# Supplementary material
Source: PubMed Central journal article supplement (PMC4651756)
Supplement: NIHMS729683-supplement-2.pdf [file NIHMS729683-supplement-2.pdf]

**Supplemental Table 1.** Percent BrdU incorporation. The value of each replicate and average of the percentage of BrdU positive cells is shown for knockdown of each gene. Knockdown of genes resulting in BrdU incorporation 3 standard deviations above or below the mean is also denoted.

| Gene Symbol   | Gene ID | Replicate 1 | Replicate 2 | Replicate 3 | Average | >3 Std Dev from mean |
|---------------|---------|-------------|-------------|-------------|---------|----------------------|
| PSMB1         | 5689    | 0.0%        | 0.0%        | 0.0%        | 0.0%    | *                    |
| POLR2E        | 5434    | 0.0%        | 0.0%        | 0.0%        | 0.0%    | *                    |
| PSMD12        | 5718    | 0.0%        | 0.0%        | 0.0%        | 0.0%    | *                    |
| ZNF558        | 148156  | 0.0%        | 0.0%        | 0.0%        | 0.0%    | *                    |
| KIAA1604      | 57703   | 0.0%        | 0.0%        | 0.0%        | 0.0%    | *                    |
| TINP1         | 10412   | 0.0%        | 0.0%        | 0.0%        | 0.0%    | *                    |
| FBXO5         | 26271   | 0.0%        | 0.0%        | 0.0%        | 0.0%    | *                    |
| CDC40         | 51362   | 0.0%        | 0.0%        | 0.0%        | 0.0%    | *                    |
| TK1           | 7083    | 0.0%        | 0.0%        | 0.0%        | 0.0%    | *                    |
| RPL8          | 6132    | 0.0%        | 0.0%        | 0.0%        | 0.0%    | *                    |
| CRNKL1        | 51340   | 0.0%        | 0.0%        | 0.0%        | 0.0%    | *                    |
| SNRPA1        | 6627    | 0.0%        | 0.0%        | 0.0%        | 0.0%    | *                    |
| SF3B1         | 23451   | 0.0%        | 0.0%        | 0.0%        | 0.0%    | *                    |
| SF3A3         | 10946   | 0.0%        | 0.0%        | 0.0%        | 0.0%    | *                    |
| RPL41         | 6171    | 0.0%        | 0.0%        | 0.0%        | 0.0%    | *                    |
| RPL7          | 6129    | 0.0%        | 0.0%        | 0.0%        | 0.0%    | *                    |
| PSMC1         | 5700    | 0.0%        | 0.0%        | 0.0%        | 0.0%    | *                    |
| PSMD3         | 5709    | 0.0%        | 0.0%        | 0.0%        | 0.0%    | *                    |
| FLJ12572      | 64927   | 0.0%        | 0.0%        | 0.0%        | 0.0%    | *                    |
| SF3B2         | 10992   | 0.0%        | 0.0%        | 0.0%        | 0.0%    | *                    |
| GRB2          | 2885    | 0.0%        | 0.0%        | 0.0%        | 0.0%    | *                    |
| PSMD2         | 5708    | 0.0%        | 0.0%        | 0.0%        | 0.0%    | *                    |
| RPL13         | 6137    | 0.0%        | 0.0%        | 0.0%        | 0.0%    | *                    |
| IMP1G1        | 3617    | 0.0%        | 0.0%        | 0.0%        | 0.0%    | *                    |
| RPL11         | 6135    | 0.0%        | 0.0%        | 0.0%        | 0.0%    | *                    |
| C22ORF19      | 8563    | 0.0%        | 0.0%        | 0.0%        | 0.0%    | *                    |
| RPL23         | 9349    | 0.0%        | 0.0%        | 0.0%        | 0.0%    | *                    |
| P14           | 51639   | 0.0%        | 0.0%        | 0.0%        | 0.0%    | *                    |
| PSMA7         | 5688    | 0.0%        | 0.0%        | 0.0%        | 0.0%    | *                    |
| PSMD8         | 5714    | 0.0%        | 0.0%        | 0.0%        | 0.0%    | *                    |
| RPL24         | 6152    | 0.0%        | 0.0%        | 0.0%        | 0.0%    | *                    |
| C13ORF22      | 10208   | 0.0%        | 0.0%        | 0.0%        | 0.0%    | *                    |
| PTK9L         | 11344   | 0.0%        | 0.0%        | 0.0%        | 0.0%    | *                    |
| RASGRP2       | 10235   | 0.0%        | 0.0%        | 0.0%        | 0.0%    | *                    |
| PSMB6         | 5694    | 0.0%        | 0.0%        | 0.0%        | 0.0%    | *                    |
| PSMD7         | 5713    | 0.0%        | 0.0%        | 0.0%        | 0.0%    | *                    |
| NGFB          | 4803    | 0.0%        | 0.0%        | 0.0%        | 0.0%    | *                    |
| PSMB3         | 5691    | 0.0%        | 0.0%        | 0.0%        | 0.0%    | *                    |
| C9ORF99       | 84263   | 0.0%        | 0.0%        | 0.0%        | 0.0%    | *                    |
| EIF354        | 8666    | 0.0%        | 0.0%        | 0.0%        | 0.0%    | *                    |
| FLJ16030      | 339559  | 0.0%        | 0.0%        | 0.0%        | 0.0%    | *                    |
| PSMA6         | 5687    | 0.0%        | 0.0%        | 0.0%        | 0.0%    | *                    |
| RPL17         | 6139    | 0.0%        | 0.0%        | 0.0%        | 0.0%    | *                    |
| PIK3R2        | 5296    | 0.0%        | 0.0%        | 0.0%        | 0.0%    | *                    |
| SPIRE2        | 84501   | 0.0%        | 0.0%        | 0.0%        | 0.0%    | *                    |
| NHP2L1        | 4809    | 0.0%        | 0.0%        | 0.0%        | 0.0%    | *                    |
| EPHB2         | 2048    | 0.0%        | 0.0%        | 0.0%        | 0.0%    | *                    |
| OR10A2        | 341276  | 0.0%        | 0.0%        | 0.0%        | 0.0%    | *                    |
| EIF4A1        | 1973    | 0.0%        | 0.0%        | 0.0%        | 0.0%    | *                    |
| SLU7          | 10569   | 0.0%        | 0.0%        | 0.0%        | 0.0%    | *                    |
| SNRPD2        | 6633    | 0.0%        | 0.0%        | 0.0%        | 0.0%    | *                    |
| PSMD11        | 5717    | 0.0%        | 0.0%        | 0.0%        | 0.0%    | *                    |
| RPL7A         | 6130    | 0.0%        | 0.0%        | 0.0%        | 0.0%    | *                    |
| RNPC2         | 9584    | 0.0%        | 0.0%        | 0.0%        | 0.0%    | *                    |
| GNAI3         | 2773    | 0.0%        | 0.0%        | 0.0%        | 0.0%    | *                    |
| TOP1MT        | 116447  | 0.0%        | 0.0%        | 0.0%        | 0.0%    | *                    |
| SLCGA13       | 6540    | 0.0%        | 0.0%        | 0.0%        | 0.0%    | *                    |
| FCHO1         | 23149   | 0.0%        | 0.0%        | 0.0%        | 0.0%    | *                    |
| C19ORF29      | 58509   | 0.0%        | 0.0%        | 0.0%        | 0.0%    | *                    |
| LOC644414     | 644414  | 0.0%        | 0.0%        | 0.0%        | 0.0%    | *                    |
| SFRS3         | 6428    | 0.0%        | 0.0%        | 0.0%        | 0.0%    | *                    |
| RPL3          | 6122    | 0.0%        | 0.0%        | 0.0%        | 0.0%    | *                    |
| RPS10         | 6204    | 0.0%        | 0.0%        | 0.0%        | 0.0%    | *                    |
| RPL36         | 25873   | 0.0%        | 0.0%        | 0.0%        | 0.0%    | *                    |
| MGC52423      | 149466  | 0.0%        | 0.0%        | 0.0%        | 0.0%    | *                    |
| SNRPD3        | 6634    | 0.0%        | 0.0%        | 0.0%        | 0.0%    | *                    |
| SF3B3         | 23450   | 0.0%        | 0.0%        | 0.0%        | 0.0%    | *                    |
| SNRPB         | 6628    | 0.0%        | 0.0%        | 0.0%        | 0.0%    | *                    |
| RPS7          | 6201    | 0.0%        | 0.0%        | 0.0%        | 0.0%    | *                    |
| MFAP1         | 4236    | 0.0%        | 0.0%        | 0.0%        | 0.0%    | *                    |
| CRSP2         | 9282    | 0.0%        | 0.0%        | 0.0%        | 0.0%    | *                    |
| SNRPF         | 6636    | 0.0%        | 0.0%        | 0.0%        | 0.0%    | *                    |
| HES4          | 57801   | 0.0%        | 0.0%        | 0.0%        | 0.0%    | *                    |
| DDX48         | 9775    | 0.0%        | 0.0%        | 0.0%        | 0.0%    | *                    |
| RPL27         | 6155    | 0.0%        | 0.0%        | 0.0%        | 0.0%    | *                    |
| GPR147        | 64106   | 0.0%        | 0.0%        | 0.0%        | 0.0%    | *                    |
| HECTD2        | 143279  | 0.0%        | 0.0%        | 0.0%        | 0.0%    | *                    |
| FLJ10199      | 55092   | 0.0%        | 0.0%        | 0.0%        | 0.0%    | *                    |
| IK            | 3550    | 0.0%        | 0.0%        | 0.0%        | 0.0%    | *                    |
| RPL35A        | 6165    | 0.0%        | 0.0%        | 0.0%        | 0.0%    | *                    |
| TRIB3         | 57761   | 0.0%        | 0.0%        | 0.0%        | 0.0%    | *                    |
| P5326         | 83638   | 0.0%        | 0.0%        | 0.0%        | 0.0%    | *                    |
| TMPPRSS6      | 164656  | 0.0%        | 0.0%        | 0.0%        | 0.0%    | *                    |
| DKFZp434N2030 | 91298   | 0.0%        | 0.0%        | 0.0%        | 0.0%    | *                    |
| NUSAP1        | 51203   | 0.0%        | 0.0%        | 0.0%        | 0.0%    | *                    |
| PSMD1         | 5707    | 0.0%        | 0.0%        | 0.0%        | 0.0%    | *                    |
| RPL19         | 6143    | 0.0%        | 0.0%        | 0.0%        | 0.0%    | *                    |
| SON           | 6651    | 0.0%        | 0.0%        | 0.0%        | 0.0%    | *                    |
| ARRDC2        | 27106   | 0.0%        | 0.0%        | 0.0%        | 0.0%    | *                    |
| RAN           | 5901    | 0.0%        | 0.0%        | 0.0%        | 0.0%    | *                    |
| RPL37A        | 6168    | 0.0%        | 0.0%        | 0.0%        | 0.0%    | *                    |

|               |        |       |       |       |      |   |
|---------------|--------|-------|-------|-------|------|---|
| RPL14         | 9045   | 0.0%  | 0.0%  | 0.0%  | 0.0% | * |
| MGC5352       | 192111 | 0.0%  | 0.0%  | 0.0%  | 0.0% | * |
| RPS28         | 6234   | 0.0%  | 0.0%  | 0.0%  | 0.0% | * |
| PRPF8         | 10594  | 0.0%  | 0.0%  | 0.0%  | 0.0% | * |
| NUMA1         | 4926   | 0.0%  | 0.0%  | 0.0%  | 0.0% | * |
| PLK1          | 5347   | 0.0%  | 0.0%  | 0.0%  | 0.0% | * |
| QP-C          | 27089  | 0.0%  | 0.0%  | 0.0%  | 0.0% | * |
| ARCN1         | 372    | 0.0%  | 0.0%  | 0.0%  | 0.0% | * |
| COPB          | 1315   | 0.0%  | 0.0%  | 0.0%  | 0.0% | * |
| UBC           | 7316   | 0.0%  | 0.0%  | 0.0%  | 0.0% | * |
| RPS29         | 6235   | 0.0%  | 0.0%  | 0.0%  | 0.0% | * |
| BC-2          | 27243  | 0.0%  | 0.0%  | 0.0%  | 0.0% | * |
| LOC92154      | 92154  | 0.0%  | 2.3%  | 0.0%  | 0.8% | * |
| ALDOA         | 226    | 1.1%  | 0.0%  | 1.7%  | 0.9% | * |
| NACA          | 4666   | 0.0%  | 0.0%  | 3.0%  | 1.0% | * |
| US-200KD      | 23020  | 3.0%  | 0.0%  | 0.0%  | 1.0% | * |
| PSMC5         | 5705   | 0.0%  | 0.0%  | 3.3%  | 1.1% | * |
| U2AF1         | 7307   | 3.4%  | 0.0%  | 0.0%  | 1.1% | * |
| CRSP8         | 9442   | 1.9%  | 1.8%  | 0.0%  | 1.2% | * |
| DHX8          | 1659   | 0.0%  | 3.8%  | 0.0%  | 1.3% | * |
| US-116KD      | 9343   | 4.2%  | 0.0%  | 0.0%  | 1.4% | * |
| SURB7         | 9412   | 4.5%  | 0.0%  | 0.0%  | 1.5% | * |
| SF3B5         | 83443  | 0.0%  | 4.5%  | 0.0%  | 1.5% | * |
| PCF11         | 51585  | 5.0%  | 0.0%  | 0.0%  | 1.7% | * |
| RPL6          | 6128   | 5.0%  | 0.0%  | 0.0%  | 1.7% | * |
| HSPC242       | 51537  | 5.0%  | 0.0%  | 0.0%  | 1.7% | * |
| KCTD11        | 147040 | 0.0%  | 5.1%  | 0.0%  | 1.7% | * |
| XEDAR         | 60401  | 0.0%  | 2.2%  | 3.7%  | 2.0% | * |
| POLR2B        | 5431   | 0.0%  | 5.9%  | 0.0%  | 2.0% | * |
| RP11-493K23.2 | 645974 | 5.9%  | 0.0%  | 0.0%  | 2.0% | * |
| RPL4          | 6124   | 0.0%  | 0.0%  | 5.9%  | 2.0% | * |
| PSMA1         | 5682   | 0.0%  | 0.0%  | 5.9%  | 2.0% | * |
| ORSV1         | 81696  | 6.3%  | 0.0%  | 0.0%  | 2.1% | * |
| POLR2F        | 5435   | 6.7%  | 0.0%  | 0.0%  | 2.2% | * |
| PSMC6         | 5706   | 6.7%  | 0.0%  | 0.0%  | 2.2% | * |
| NUP93         | 9688   | 6.7%  | 0.0%  | 0.0%  | 2.2% | * |
| RPL10A        | 4736   | 0.0%  | 0.0%  | 6.7%  | 2.2% | * |
| JAG2          | 3714   | 3.2%  | 3.6%  | 0.0%  | 2.3% | * |
| UBL5          | 59286  | 0.0%  | 7.1%  | 0.0%  | 2.4% | * |
| EIF1AX        | 1964   | 7.1%  | 0.0%  | 0.0%  | 2.4% | * |
| KLF1          | 10661  | 1.2%  | 1.1%  | 5.0%  | 2.5% | * |
| CPSF1         | 29894  | 7.7%  | 0.0%  | 0.0%  | 2.6% | * |
| GPR15         | 2838   | 0.0%  | 0.0%  | 7.7%  | 2.6% | * |
| FAU           | 2197   | 7.7%  | 0.0%  | 0.0%  | 2.6% | * |
| NQO3A2        | 51706  | 0.0%  | 4.0%  | 3.7%  | 2.6% | * |
| PRKAG3        | 53632  | 2.6%  | 5.3%  | 0.0%  | 2.6% | * |
| PDE9A         | 5152   | 3.3%  | 2.8%  | 2.0%  | 2.7% | * |
| LRAT          | 9227   | 0.0%  | 0.0%  | 8.3%  | 2.8% | * |
| PSMB5         | 5693   | 0.0%  | 8.3%  | 0.0%  | 2.8% | * |
| EDD1          | 51366  | 8.3%  | 0.0%  | 0.0%  | 2.8% | * |
| COPG          | 22820  | 8.3%  | 0.0%  | 0.0%  | 2.8% | * |
| GNPDA1        | 10007  | 8.3%  | 0.0%  | 0.0%  | 2.8% | * |
| RNASE6        | 6039   | 0.0%  | 2.4%  | 6.1%  | 2.8% | * |
| PLCD4         | 84812  | 1.7%  | 0.0%  | 6.8%  | 2.8% | * |
| LOC345079     | 345079 | 0.0%  | 3.3%  | 5.4%  | 2.9% | * |
| PRSS22        | 64063  | 4.3%  | 1.3%  | 3.2%  | 2.9% | * |
| STAR          | 6770   | 6.1%  | 0.0%  | 3.0%  | 3.0% | * |
| HRH1          | 3269   | 0.0%  | 0.0%  | 9.1%  | 3.0% | * |
| NUP205        | 23165  | 0.0%  | 9.1%  | 0.0%  | 3.0% | * |
| RPS21         | 6227   | 9.1%  | 0.0%  | 0.0%  | 3.0% | * |
| RPL21         | 6144   | 0.0%  | 9.1%  | 0.0%  | 3.0% | * |
| BAMBI         | 25805  | 0.0%  | 0.0%  | 9.1%  | 3.0% | * |
| LSM2          | 57819  | 9.1%  | 0.0%  | 0.0%  | 3.0% | * |
| H17           | 55572  | 9.4%  | 0.0%  | 0.0%  | 3.1% | * |
| BCL2          | 596    | 0.0%  | 0.0%  | 9.4%  | 3.1% | * |
| EIF3S2        | 8668   | 9.5%  | 0.0%  | 0.0%  | 3.2% | * |
| RAB43         | 339122 | 0.0%  | 0.0%  | 9.6%  | 3.2% | * |
| MAN2B2        | 23324  | 5.9%  | 0.0%  | 3.8%  | 3.2% | * |
| EIF5A2        | 56648  | 0.0%  | 0.0%  | 10.0% | 3.3% | * |
| RPS3A         | 6189   | 0.0%  | 10.0% | 0.0%  | 3.3% | * |
| RPL12         | 6136   | 10.0% | 0.0%  | 0.0%  | 3.3% | * |
| ASB14         | 142686 | 3.9%  | 0.0%  | 6.2%  | 3.4% | * |
| NFYB          | 4801   | 1.7%  | 3.6%  | 4.8%  | 3.4% | * |
| SF3A1         | 10291  | 5.6%  | 0.0%  | 4.5%  | 3.4% | * |
| PCCB          | 5096   | 7.5%  | 0.0%  | 2.9%  | 3.5% | * |
| TBX2          | 6909   | 0.0%  | 10.5% | 0.0%  | 3.5% | * |
| FLJ10904      | 55255  | 3.0%  | 4.9%  | 2.6%  | 3.5% | * |
| SNRPG         | 6637   | 3.0%  | 2.1%  | 5.4%  | 3.5% | * |
| BPHL          | 670    | 1.1%  | 0.0%  | 9.7%  | 3.6% | * |
| PAM           | 5066   | 0.0%  | 10.8% | 0.0%  | 3.6% | * |
| NIFUN         | 23479  | 4.1%  | 0.0%  | 6.8%  | 3.6% | * |
| FLJ13150      | 79871  | 4.9%  | 3.8%  | 2.3%  | 3.7% | * |
| PHF1          | 5252   | 2.9%  | 3.8%  | 4.3%  | 3.7% | * |
| PSMD6         | 9861   | 11.1% | 0.0%  | 0.0%  | 3.7% | * |
| KIAA1160      | 57461  | 11.1% | 0.0%  | 0.0%  | 3.7% | * |
| RPL18         | 6141   | 11.1% | 0.0%  | 0.0%  | 3.7% | * |
| COPA          | 1314   | 0.0%  | 0.0%  | 11.1% | 3.7% | * |
| SEMA6B        | 10501  | 0.0%  | 0.0%  | 11.1% | 3.7% | * |
| RRM2          | 6241   | 4.8%  | 0.0%  | 6.7%  | 3.8% | * |
| MYST1         | 84148  | 5.0%  | 0.0%  | 6.5%  | 3.8% | * |
| MLLT1         | 4298   | 0.0%  | 2.6%  | 8.9%  | 3.8% | * |
| LOC144983     | 144983 | 0.0%  | 7.1%  | 4.3%  | 3.8% | * |
| PDCC5         | 9141   | 0.0%  | 0.0%  | 11.5% | 3.8% | * |
| SIRT3         | 23410  | 0.0%  | 11.8% | 0.0%  | 3.9% | * |
| SMU1          | 55234  | 11.8% | 0.0%  | 0.0%  | 3.9% | * |
| PSMB7         | 5695   | 11.8% | 0.0%  | 0.0%  | 3.9% | * |
| TMED3         | 23423  | 9.4%  | 0.0%  | 2.4%  | 3.9% | * |
| AURKB         | 9212   | 0.0%  | 3.8%  | 8.0%  | 3.9% | * |

|           |        |       |       |       |      |
|-----------|--------|-------|-------|-------|------|
| F12       | 2161   | 3.4%  | 2.5%  | 6.1%  | 4.0% |
| EFS       | 10278  | 4.5%  | 3.4%  | 4.3%  | 4.1% |
| GPR92     | 57121  | 0.0%  | 4.2%  | 8.2%  | 4.1% |
| PSMA4     | 5685   | 4.8%  | 7.7%  | 0.0%  | 4.2% |
| STAM      | 8027   | 0.0%  | 0.0%  | 12.5% | 4.2% |
| RAD21     | 5885   | 6.6%  | 3.0%  | 3.2%  | 4.3% |
| FLJ22688  | 80199  | 5.4%  | 1.2%  | 6.2%  | 4.3% |
| FLJ45032  | 643853 | 8.7%  | 0.0%  | 4.2%  | 4.3% |
| IFNW1     | 3467   | 0.0%  | 4.9%  | 8.0%  | 4.3% |
| RPL26     | 6154   | 0.0%  | 9.1%  | 3.8%  | 4.3% |
| ESM1      | 11082  | 5.1%  | 0.0%  | 7.9%  | 4.3% |
| LG14      | 163175 | 0.0%  | 0.0%  | 13.0% | 4.3% |
| RPL9      | 6133   | 0.0%  | 0.0%  | 13.0% | 4.3% |
| JPH3      | 57338  | 8.9%  | 1.9%  | 2.3%  | 4.4% |
| XPO1      | 7514   | 8.0%  | 1.6%  | 3.6%  | 4.4% |
| RPL5      | 6125   | 9.1%  | 0.0%  | 4.2%  | 4.4% |
| ZNF573    | 126231 | 0.0%  | 0.0%  | 13.3% | 4.4% |
| ABCG1     | 9619   | 13.3% | 0.0%  | 0.0%  | 4.4% |
| OPRS1     | 10280  | 8.3%  | 0.0%  | 5.0%  | 4.4% |
| FLJ20558  | 54980  | 6.2%  | 1.9%  | 5.4%  | 4.5% |
| RAB1B     | 81876  | 4.9%  | 5.0%  | 3.6%  | 4.5% |
| GPR146    | 115330 | 6.4%  | 3.8%  | 3.4%  | 4.6% |
| RPS14     | 6208   | 7.1%  | 0.0%  | 6.7%  | 4.6% |
| GPX3      | 2878   | 9.4%  | 0.0%  | 4.5%  | 4.6% |
| GGT1      | 2678   | 0.0%  | 0.0%  | 13.9% | 4.6% |
| CD28      | 940    | 2.9%  | 2.2%  | 8.9%  | 4.6% |
| RAMP      | 51514  | 0.0%  | 0.0%  | 14.3% | 4.8% |
| PSMC2     | 5701   | 0.0%  | 0.0%  | 14.3% | 4.8% |
| PSMA3     | 5684   | 14.3% | 0.0%  | 0.0%  | 4.8% |
| LOC112937 | 112937 | 0.0%  | 0.0%  | 14.3% | 4.8% |
| FLJ14936  | 84950  | 14.3% | 0.0%  | 0.0%  | 4.8% |
| NEURL     | 9148   | 14.3% | 0.0%  | 0.0%  | 4.8% |
| WFIKKN    | 117166 | 14.3% | 0.0%  | 0.0%  | 4.8% |
| KCNK6     | 9424   | 7.7%  | 0.0%  | 6.7%  | 4.8% |
| OR6X1     | 390260 | 0.0%  | 9.4%  | 5.1%  | 4.8% |
| PLS1      | 5357   | 3.6%  | 0.0%  | 11.0% | 4.9% |
| RNF122    | 79845  | 5.8%  | 1.0%  | 7.9%  | 4.9% |
| PGAP1     | 80055  | 5.9%  | 3.9%  | 4.9%  | 4.9% |
| ERCC1     | 2067   | 8.7%  | 2.0%  | 4.3%  | 5.0% |
| UBA52     | 7311   | 8.3%  | 0.0%  | 6.7%  | 5.0% |
| D2LUC     | 51626  | 2.1%  | 3.1%  | 9.9%  | 5.0% |
| LTBR      | 4055   | 4.2%  | 8.3%  | 2.6%  | 5.0% |
| LSM6      | 11157  | 0.0%  | 6.5%  | 8.7%  | 5.0% |
| PLCD3     | 113026 | 12.0% | 1.8%  | 1.4%  | 5.1% |
| LOC84549  | 84549  | 7.3%  | 5.0%  | 3.0%  | 5.1% |
| SMO       | 6608   | 2.2%  | 9.0%  | 4.3%  | 5.2% |
| DOC1      | 11259  | 10.9% | 0.0%  | 4.8%  | 5.2% |
| PROL1     | 58503  | 5.0%  | 0.0%  | 10.7% | 5.2% |
| CAMKK1    | 84254  | 2.1%  | 10.0% | 3.7%  | 5.3% |
| PHLDA1    | 22822  | 0.0%  | 0.0%  | 15.9% | 5.3% |
| EPDR1     | 54749  | 0.0%  | 7.8%  | 8.1%  | 5.3% |
| LOC402176 | 402176 | 3.2%  | 8.7%  | 4.1%  | 5.3% |
| PCDHGA12  | 26025  | 5.8%  | 6.0%  | 4.2%  | 5.3% |
| EDN2      | 1907   | 4.7%  | 0.0%  | 11.4% | 5.3% |
| PCNT      | 5116   | 3.4%  | 1.9%  | 11.0% | 5.4% |
| DDX19     | 11269  | 4.3%  | 4.9%  | 7.4%  | 5.5% |
| PSMD14    | 10213  | 16.7% | 0.0%  | 0.0%  | 5.6% |
| LOC343263 | 343263 | 0.0%  | 0.0%  | 16.7% | 5.6% |
| POLR2H    | 5437   | 16.7% | 0.0%  | 0.0%  | 5.6% |
| LLGL1     | 3996   | 0.0%  | 16.7% | 0.0%  | 5.6% |
| EIF2S2    | 8894   | 16.7% | 0.0%  | 0.0%  | 5.6% |
| UNQ3045   | 389383 | 3.8%  | 2.9%  | 10.0% | 5.6% |
| ETHE1     | 23474  | 12.5% | 0.0%  | 4.3%  | 5.6% |
| PSMB4     | 5692   | 7.1%  | 0.0%  | 10.0% | 5.7% |
| CHIT1     | 1118   | 6.0%  | 5.9%  | 5.4%  | 5.7% |
| KISS1     | 3814   | 7.5%  | 2.7%  | 7.0%  | 5.7% |
| PSMB2     | 5690   | 12.5% | 4.8%  | 0.0%  | 5.8% |
| XRCC1     | 7515   | 0.0%  | 6.3%  | 11.1% | 5.8% |
| FSTL3     | 10272  | 14.7% | 2.7%  | 0.0%  | 5.8% |
| ASC       | 29108  | 5.9%  | 11.8% | 0.0%  | 5.9% |
| RPL30     | 6156   | 0.0%  | 0.0%  | 17.6% | 5.9% |
| VDRIP     | 29079  | 7.1%  | 0.0%  | 10.5% | 5.9% |
| KCNS3     | 3790   | 5.7%  | 5.7%  | 6.3%  | 5.9% |
| LOC653314 | 653314 | 10.0% | 0.0%  | 7.7%  | 5.9% |
| CIB2      | 10518  | 2.8%  | 3.2%  | 11.7% | 5.9% |
| CAPN1     | 823    | 8.6%  | 4.1%  | 5.1%  | 5.9% |
| CDCA1     | 83540  | 5.8%  | 5.4%  | 6.7%  | 5.9% |
| MTX1      | 4580   | 16.2% | 1.6%  | 0.0%  | 6.0% |
| BEX2      | 84707  | 5.8%  | 3.1%  | 9.0%  | 6.0% |
| IMP-1     | 10642  | 4.2%  | 2.1%  | 11.6% | 6.0% |
| NYD-SP14  | 83894  | 12.5% | 3.0%  | 2.5%  | 6.0% |
| EVER2     | 147138 | 6.5%  | 5.8%  | 5.9%  | 6.0% |
| TUBB4Q    | 56604  | 0.0%  | 18.2% | 0.0%  | 6.1% |
| EPRS      | 2058   | 18.2% | 0.0%  | 0.0%  | 6.1% |
| COPB2     | 9276   | 18.2% | 0.0%  | 0.0%  | 6.1% |
| FCGR2C    | 9103   | 4.9%  | 7.0%  | 6.6%  | 6.1% |
| OR13H1    | 347468 | 0.0%  | 0.0%  | 18.6% | 6.2% |
| AKT1      | 207    | 8.8%  | 6.0%  | 3.8%  | 6.2% |
| MGC45866  | 90381  | 0.0%  | 4.3%  | 14.3% | 6.2% |
| CDC2L1    | 984    | 0.0%  | 13.6% | 5.0%  | 6.2% |
| GPR132    | 29933  | 13.3% | 0.0%  | 5.4%  | 6.2% |
| ASGR1     | 432    | 8.3%  | 2.7%  | 7.8%  | 6.3% |
| HMG20B    | 10362  | 4.3%  | 6.2%  | 8.6%  | 6.4% |
| ADORA1    | 134    | 8.4%  | 5.2%  | 5.5%  | 6.4% |
| MGC4308   | 84319  | 0.0%  | 14.3% | 5.3%  | 6.5% |
| NINJ1     | 4814   | 13.3% | 0.0%  | 6.3%  | 6.5% |
| GNB1L     | 54584  | 9.7%  | 4.2%  | 5.9%  | 6.6% |
| PLOD3     | 8985   | 7.5%  | 9.8%  | 2.5%  | 6.6% |

\*  
\*  
\*

|               |        |       |       |       |      |
|---------------|--------|-------|-------|-------|------|
| FLJ12455      | 63906  | 10.3% | 3.3%  | 6.3%  | 6.6% |
| RTDR1         | 27156  | 5.3%  | 0.0%  | 14.7% | 6.7% |
| PSMA2         | 5683   | 20.0% | 0.0%  | 0.0%  | 6.7% |
| LOC127391     | 127391 | 0.0%  | 0.0%  | 20.0% | 6.7% |
| KPNB1         | 3837   | 10.0% | 10.0% | 0.0%  | 6.7% |
| C20ORF75      | 164312 | 6.7%  | 0.0%  | 13.3% | 6.7% |
| DONSON        | 29980  | 0.0%  | 0.0%  | 20.0% | 6.7% |
| FLJ32921      | 133923 | 8.5%  | 4.0%  | 7.5%  | 6.7% |
| AVPR1B        | 553    | 4.8%  | 5.7%  | 9.7%  | 6.7% |
| TMEM39A       | 55254  | 4.0%  | 5.6%  | 10.7% | 6.8% |
| TNRC5         | 10695  | 1.7%  | 11.4% | 7.3%  | 6.8% |
| ZNF148        | 7707   | 6.5%  | 6.8%  | 7.2%  | 6.8% |
| FLJ23436      | 79724  | 0.0%  | 11.4% | 9.1%  | 6.8% |
| UVRAG         | 7405   | 8.8%  | 0.0%  | 11.8% | 6.9% |
| MGC45386      | 374659 | 4.2%  | 1.7%  | 14.7% | 6.9% |
| FLJ40411      | 375316 | 4.5%  | 1.5%  | 14.6% | 6.9% |
| LOC390637     | 390637 | 3.2%  | 7.9%  | 9.6%  | 6.9% |
| FDPS          | 2224   | 8.7%  | 0.0%  | 12.1% | 6.9% |
| DNCI2         | 1781   | 11.4% | 3.7%  | 6.0%  | 7.0% |
| OR4X2         | 119764 | 7.9%  | 0.0%  | 13.2% | 7.0% |
| RFPL4B        | 442247 | 12.5% | 4.1%  | 4.7%  | 7.1% |
| CRLF3         | 51379  | 9.6%  | 5.7%  | 6.1%  | 7.1% |
| FLJ30681      | 147372 | 21.4% | 0.0%  | 0.0%  | 7.1% |
| CHAF1B        | 8208   | 21.4% | 0.0%  | 0.0%  | 7.1% |
| DGKH          | 160851 | 1.4%  | 7.1%  | 13.0% | 7.2% |
| C1orf48       | 25936  | 13.0% | 0.0%  | 8.5%  | 7.2% |
| POLE4         | 56655  | 9.2%  | 5.5%  | 6.9%  | 7.2% |
| C6ORF105      | 84830  | 9.1%  | 12.5% | 0.0%  | 7.2% |
| LRP8          | 7804   | 6.1%  | 6.7%  | 8.8%  | 7.2% |
| RP11-159H20.4 | 442425 | 3.9%  | 13.8% | 4.0%  | 7.2% |
| MADD          | 8567   | 21.7% | 0.0%  | 0.0%  | 7.2% |
| FAF1          | 11124  | 12.1% | 0.0%  | 9.7%  | 7.3% |
| C20ORF55      | 83541  | 0.0%  | 7.7%  | 14.3% | 7.3% |
| STGGAL2       | 84620  | 14.8% | 1.8%  | 5.5%  | 7.3% |
| CNIH3         | 149111 | 8.1%  | 8.2%  | 5.9%  | 7.4% |
| TMOD4         | 29765  | 4.0%  | 12.5% | 5.7%  | 7.4% |
| CNKSR1        | 10256  | 10.4% | 0.0%  | 11.8% | 7.4% |
| HIST1H2B0     | 8348   | 11.8% | 0.0%  | 10.5% | 7.4% |
| TBC1D16       | 125058 | 3.2%  | 8.6%  | 10.4% | 7.4% |
| FLJ12700      | 79970  | 2.3%  | 9.0%  | 11.0% | 7.5% |
| AGPAT3        | 56894  | 0.0%  | 0.0%  | 22.4% | 7.5% |
| CDKN1C        | 1028   | 4.7%  | 6.7%  | 11.0% | 7.5% |
| EIF3S8        | 8663   | 12.5% | 10.0% | 0.0%  | 7.5% |
| OR11L1        | 391189 | 10.3% | 8.3%  | 3.8%  | 7.5% |
| SMUG1         | 23583  | 18.7% | 2.2%  | 1.7%  | 7.5% |
| MTBP          | 27085  | 9.1%  | 5.7%  | 7.8%  | 7.5% |
| SLC6A5        | 9152   | 7.6%  | 7.1%  | 7.9%  | 7.5% |
| FGF22         | 27006  | 14.3% | 0.0%  | 8.3%  | 7.5% |
| DUSP4         | 1846   | 5.5%  | 6.9%  | 10.3% | 7.6% |
| SAP30         | 8819   | 9.4%  | 4.0%  | 9.3%  | 7.6% |
| CDH16         | 1014   | 9.3%  | 2.8%  | 10.7% | 7.6% |
| CCL3L3        | 414062 | 0.0%  | 6.3%  | 16.4% | 7.6% |
| RYD5          | 147199 | 6.0%  | 4.3%  | 12.6% | 7.6% |
| USP20         | 10868  | 8.7%  | 8.3%  | 6.0%  | 7.7% |
| PSMD4         | 5710   | 0.0%  | 12.5% | 10.7% | 7.7% |
| GPR123        | 84435  | 6.9%  | 10.5% | 5.8%  | 7.7% |
| HSU79274      | 29902  | 2.6%  | 3.4%  | 17.3% | 7.7% |
| MARCH4        | 57574  | 10.0% | 13.3% | 0.0%  | 7.8% |
| APOA2         | 336    | 11.8% | 3.8%  | 7.8%  | 7.8% |
| RPS18         | 6222   | 17.4% | 3.7%  | 2.4%  | 7.8% |
| FHL2          | 2274   | 5.3%  | 2.8%  | 15.4% | 7.8% |
| SSTR5         | 6755   | 8.5%  | 7.7%  | 7.4%  | 7.8% |
| POLR2C        | 5432   | 9.7%  | 3.8%  | 10.0% | 7.8% |
| FES           | 2242   | 7.0%  | 9.4%  | 7.2%  | 7.9% |
| SERTAD1       | 29950  | 8.2%  | 11.4% | 4.1%  | 7.9% |
| SNRPD1        | 6632   | 6.9%  | 5.7%  | 11.1% | 7.9% |
| LAIR1         | 3903   | 8.9%  | 3.3%  | 11.6% | 7.9% |
| LOC57146      | 57146  | 8.2%  | 4.2%  | 11.4% | 7.9% |
| C21ORF62      | 56245  | 0.0%  | 0.0%  | 23.8% | 7.9% |
| PCTK1         | 5127   | 0.0%  | 7.1%  | 16.7% | 7.9% |
| LOC153328     | 153328 | 4.2%  | 10.6% | 9.2%  | 8.0% |
| CTSC          | 1075   | 24.0% | 0.0%  | 0.0%  | 8.0% |
| UNQ470        | 375704 | 1.6%  | 14.5% | 7.9%  | 8.0% |
| LRAP          | 64167  | 10.7% | 6.3%  | 7.0%  | 8.0% |
| PLA1A         | 51365  | 3.7%  | 13.9% | 6.5%  | 8.0% |
| HSD17B1       | 3292   | 11.0% | 2.5%  | 10.7% | 8.0% |
| NSBP1         | 79366  | 6.8%  | 8.2%  | 9.1%  | 8.0% |
| PPGB          | 5476   | 11.0% | 7.5%  | 5.6%  | 8.1% |
| UBE2L3        | 7332   | 12.5% | 4.8%  | 6.9%  | 8.1% |
| PRPF19        | 27339  | 12.1% | 10.3% | 1.9%  | 8.1% |
| ENPP2         | 5168   | 4.0%  | 9.3%  | 11.1% | 8.1% |
| TRIM31        | 11074  | 12.9% | 4.7%  | 6.8%  | 8.1% |
| LOC126917     | 126917 | 6.0%  | 4.2%  | 14.2% | 8.1% |
| RNF4          | 6047   | 11.1% | 6.7%  | 6.7%  | 8.1% |
| GSTK1         | 373156 | 10.0% | 6.9%  | 7.6%  | 8.2% |
| INSM1         | 3642   | 11.5% | 3.8%  | 9.2%  | 8.2% |
| FLJ14566      | 84892  | 10.0% | 6.3%  | 8.3%  | 8.2% |
| TFF3          | 7033   | 9.4%  | 0.0%  | 15.2% | 8.2% |
| CART          | 9607   | 2.6%  | 2.6%  | 19.4% | 8.2% |
| LOC653499     | 653499 | 8.3%  | 7.4%  | 8.9%  | 8.2% |
| FLJ20010      | 54494  | 9.4%  | 5.7%  | 9.6%  | 8.2% |
| DUB1A         | 402164 | 4.0%  | 6.6%  | 14.2% | 8.2% |
| LCK           | 3932   | 7.5%  | 4.3%  | 12.9% | 8.3% |
| MGC35138      | 256329 | 8.2%  | 7.1%  | 9.4%  | 8.3% |
| FLJ31121      | 153527 | 11.6% | 8.3%  | 4.9%  | 8.3% |
| EMX1          | 2016   | 0.0%  | 0.0%  | 24.9% | 8.3% |
| RPL38         | 6169   | 10.0% | 4.3%  | 10.5% | 8.3% |
| SHOX2         | 6474   | 11.0% | 7.4%  | 6.6%  | 8.3% |

|           |           |       |       |       |      |
|-----------|-----------|-------|-------|-------|------|
| C11ORF13  | 8045      | 7.7%  | 6.9%  | 10.3% | 8.3% |
| RBBP9     | 10741     | 0.0%  | 25.0% | 0.0%  | 8.3% |
| PLCL2     | 23228     | 0.0%  | 25.0% | 0.0%  | 8.3% |
| CWF19L2   | 143884    | 25.0% | 0.0%  | 0.0%  | 8.3% |
| SFPQ      | 6421      | 0.0%  | 0.0%  | 25.0% | 8.3% |
| AQR       | 9716      | 25.0% | 0.0%  | 0.0%  | 8.3% |
| FYCO1     | 79443     | 13.4% | 6.8%  | 4.8%  | 8.4% |
| ETFA      | 2108      | 10.6% | 6.8%  | 7.6%  | 8.4% |
| LOC388910 | 388910    | 10.8% | 7.1%  | 7.1%  | 8.4% |
| APS       | 10603     | 9.7%  | 5.3%  | 10.2% | 8.4% |
| CYP3A43   | 64816     | 10.3% | 0.0%  | 14.8% | 8.4% |
| C19ORF14  | 284403    | 2.1%  | 9.5%  | 13.5% | 8.4% |
| ADCY9     | 115       | 12.4% | 4.7%  | 8.1%  | 8.4% |
| LOC90580  | 90580     | 5.2%  | 5.0%  | 15.0% | 8.4% |
| ABCE1     | 6059      | 21.2% | 0.0%  | 4.1%  | 8.4% |
| CRYBB1    | 1414      | 0.0%  | 18.2% | 7.1%  | 8.4% |
| ZNF141    | 7700      | 20.4% | 2.2%  | 2.9%  | 8.5% |
| PLEKHJ1   | 55111     | 4.3%  | 7.4%  | 13.8% | 8.5% |
| CLCN3     | 1182      | 15.3% | 0.0%  | 10.2% | 8.5% |
| CKAP5     | 9793      | 13.6% | 4.8%  | 7.1%  | 8.5% |
| NAT6      | 24142     | 19.4% | 0.6%  | 5.6%  | 8.5% |
| PL6       | 11070     | 9.3%  | 10.8% | 5.5%  | 8.5% |
| TRG20     | 84246     | 3.3%  | 9.8%  | 12.5% | 8.5% |
| POLA2     | 23649     | 1.5%  | 7.1%  | 16.9% | 8.5% |
| DDX53     | 168400    | 9.2%  | 5.4%  | 11.1% | 8.6% |
| DZIP3     | 9666      | 9.1%  | 4.2%  | 12.5% | 8.6% |
| LOC339231 | 339231    | 16.7% | 0.0%  | 9.1%  | 8.6% |
| C19ORF24  | 55009     | 7.7%  | 18.2% | 0.0%  | 8.6% |
| STARD13   | 90627     | 7.1%  | 0.0%  | 18.8% | 8.6% |
| SHFM3     | 6468      | 11.1% | 11.1% | 3.7%  | 8.6% |
| SBK1      | 388228    | 4.9%  | 7.5%  | 13.5% | 8.6% |
| LOC342897 | 342897    | 6.4%  | 6.6%  | 13.0% | 8.7% |
| ZNF205    | 7755      | 0.0%  | 10.0% | 16.0% | 8.7% |
| ACP2      | 53        | 9.5%  | 5.9%  | 10.7% | 8.7% |
| HEATR1    | 55127     | 13.0% | 7.8%  | 5.3%  | 8.7% |
| CEACAM7   | 1087      | 3.8%  | 10.8% | 11.6% | 8.7% |
| LOC201175 | 201175    | 14.3% | 4.4%  | 7.5%  | 8.7% |
| MINA      | 84864     | 7.7%  | 9.7%  | 8.8%  | 8.7% |
| SDCBP     | 6386      | 22.9% | 2.0%  | 1.4%  | 8.7% |
| STX12     | 23673     | 20.0% | 0.0%  | 6.3%  | 8.8% |
| BRF1      | 2972      | 7.5%  | 0.0%  | 18.8% | 8.8% |
| IRF5      | 3663      | 11.2% | 11.4% | 3.7%  | 8.8% |
| ARID1A    | 8289      | 10.2% | 3.2%  | 12.9% | 8.8% |
| ZNF342    | 162979    | 5.3%  | 9.6%  | 11.5% | 8.8% |
| HOXB13    | 10481     | 18.1% | 4.0%  | 4.3%  | 8.8% |
| HMGB2     | 3148      | 16.7% | 0.0%  | 9.8%  | 8.8% |
| KRTAP6-3  | 337968    | 10.1% | 11.6% | 4.8%  | 8.8% |
| AXUD1     | 64651     | 3.2%  | 13.1% | 10.3% | 8.9% |
| SPINK5    | 11005     | 13.6% | 5.5%  | 7.6%  | 8.9% |
| LYPLA2    | 11313     | 6.7%  | 20.0% | 0.0%  | 8.9% |
| PSMD13    | 5719      | 9.2%  | 9.2%  | 8.3%  | 8.9% |
| ENTPD1    | 953       | 7.3%  | 11.8% | 7.7%  | 8.9% |
| C19orf71  | 100128569 | 14.3% | 0.0%  | 12.5% | 8.9% |
| IL17RE    | 132014    | 7.3%  | 10.1% | 9.4%  | 8.9% |
| HIST1H4D  | 8360      | 4.8%  | 13.0% | 9.2%  | 9.0% |
| LOC96610  | 96610     | 12.7% | 5.7%  | 8.5%  | 9.0% |
| TM4SF7    | 7106      | 7.8%  | 5.8%  | 13.3% | 9.0% |
| SDC3      | 9672      | 14.1% | 4.1%  | 8.9%  | 9.0% |
| FIGN      | 55137     | 7.4%  | 4.9%  | 14.9% | 9.1% |
| GPR17     | 2840      | 0.0%  | 10.5% | 16.7% | 9.1% |
| AIRE      | 326       | 13.9% | 2.2%  | 11.1% | 9.1% |
| KCNC3     | 3748      | 12.5% | 0.0%  | 14.7% | 9.1% |
| CGI-41    | 51093     | 6.8%  | 9.8%  | 10.6% | 9.1% |
| PDGFA     | 5154      | 11.5% | 5.4%  | 10.4% | 9.1% |
| SLC2A8    | 29988     | 0.0%  | 27.3% | 0.0%  | 9.1% |
| NF2       | 4771      | 7.1%  | 2.1%  | 18.0% | 9.1% |
| LOC155435 | 155435    | 11.0% | 3.5%  | 12.8% | 9.1% |
| CKN1      | 1161      | 15.0% | 9.1%  | 3.2%  | 9.1% |
| MICA      | 4276      | 14.1% | 2.5%  | 10.8% | 9.1% |
| MX2       | 4600      | 11.3% | 6.5%  | 9.7%  | 9.1% |
| BSND      | 7809      | 11.5% | 5.8%  | 10.1% | 9.2% |
| MED6      | 10001     | 9.0%  | 9.8%  | 8.8%  | 9.2% |
| PARP6     | 56965     | 5.6%  | 10.3% | 11.8% | 9.2% |
| FFAR1     | 2864      | 7.7%  | 8.2%  | 11.7% | 9.2% |
| ERBP      | 30836     | 7.8%  | 4.2%  | 15.6% | 9.2% |
| DHX29     | 54505     | 8.3%  | 4.3%  | 15.0% | 9.2% |
| MMP26     | 56547     | 9.6%  | 11.4% | 6.7%  | 9.2% |
| MED28     | 80306     | 11.1% | 2.9%  | 13.8% | 9.3% |
| FLJ12975  | 79867     | 6.2%  | 2.9%  | 18.7% | 9.3% |
| KCNJ14    | 3770      | 18.5% | 0.0%  | 9.3%  | 9.3% |
| SGOL1     | 151648    | 7.1%  | 16.7% | 4.0%  | 9.3% |
| TMOD3     | 29766     | 9.6%  | 10.6% | 7.6%  | 9.3% |
| COPZ1     | 22818     | 15.4% | 0.0%  | 12.5% | 9.3% |
| GPR18     | 2841      | 5.0%  | 11.3% | 11.6% | 9.3% |
| ABI1      | 10006     | 0.0%  | 8.0%  | 20.0% | 9.3% |
| THBS4     | 7060      | 11.5% | 13.4% | 3.0%  | 9.3% |
| PLGLB1    | 5343      | 0.0%  | 4.3%  | 23.7% | 9.3% |
| EOS       | 260429    | 12.1% | 3.7%  | 12.2% | 9.4% |
| KIAA0999  | 23387     | 9.4%  | 9.9%  | 8.8%  | 9.4% |
| OR8B12    | 219858    | 9.8%  | 4.1%  | 14.3% | 9.4% |
| KRTAP5-7  | 440050    | 12.0% | 4.0%  | 12.2% | 9.4% |
| FXYD3     | 5349      | 16.1% | 1.8%  | 10.4% | 9.4% |
| CORO2A    | 7464      | 15.8% | 0.0%  | 12.5% | 9.4% |
| LSM8      | 51691     | 14.8% | 8.3%  | 5.3%  | 9.5% |
| POFUT1    | 23509     | 6.3%  | 11.1% | 11.0% | 9.5% |
| C6ORF64   | 55776     | 4.0%  | 15.9% | 8.6%  | 9.5% |
| ZIM2      | 23619     | 8.3%  | 3.2%  | 17.0% | 9.5% |
| GLRA4     | 441509    | 11.0% | 4.3%  | 13.2% | 9.5% |

|              |        |       |       |       |       |
|--------------|--------|-------|-------|-------|-------|
| FLJ22938     | 79729  | 5.0%  | 0.0%  | 23.5% | 9.5%  |
| ATP5G2       | 517    | 9.3%  | 6.1%  | 13.1% | 9.5%  |
| C6ORF85      | 63027  | 8.2%  | 5.5%  | 14.8% | 9.5%  |
| LOC349236    | 349236 | 7.4%  | 6.6%  | 14.7% | 9.6%  |
| HINT2        | 84681  | 10.5% | 0.0%  | 18.2% | 9.6%  |
| SLC23A2      | 9962   | 5.9%  | 7.2%  | 15.6% | 9.6%  |
| MGC12466     | 93474  | 7.5%  | 3.6%  | 17.7% | 9.6%  |
| ZNF537       | 57616  | 8.7%  | 2.9%  | 17.2% | 9.6%  |
| DKFZP761A132 | 84256  | 10.9% | 5.5%  | 12.4% | 9.6%  |
| MGC5395      | 79026  | 6.3%  | 9.5%  | 13.0% | 9.6%  |
| TGFB3        | 7043   | 13.0% | 11.6% | 4.2%  | 9.6%  |
| C1QTNF6      | 114904 | 4.4%  | 12.5% | 11.9% | 9.6%  |
| ONECUT2      | 9480   | 14.1% | 10.6% | 4.2%  | 9.6%  |
| LONRF2       | 164832 | 11.6% | 0.0%  | 17.3% | 9.6%  |
| RPP25        | 54913  | 18.2% | 0.0%  | 10.7% | 9.6%  |
| UNK          | 85451  | 12.7% | 8.6%  | 7.8%  | 9.7%  |
| GOLGA2       | 2801   | 11.8% | 8.7%  | 8.6%  | 9.7%  |
| ZNF599       | 148103 | 7.9%  | 10.3% | 10.9% | 9.7%  |
| GPR88        | 54112  | 8.2%  | 10.8% | 10.2% | 9.7%  |
| LOC157570    | 157570 | 8.8%  | 4.4%  | 15.9% | 9.7%  |
| PPP1CC       | 5501   | 0.0%  | 12.8% | 16.4% | 9.7%  |
| LOC91461     | 91461  | 5.7%  | 4.1%  | 19.4% | 9.7%  |
| ZNF580       | 51157  | 5.6%  | 0.0%  | 23.7% | 9.7%  |
| FLJ32965     | 139422 | 10.8% | 7.0%  | 11.5% | 9.7%  |
| MGC88387     | 400569 | 5.1%  | 11.3% | 12.9% | 9.7%  |
| LMOD1        | 25802  | 13.3% | 0.0%  | 15.9% | 9.7%  |
| ATP6VOD1     | 9114   | 18.3% | 7.8%  | 3.2%  | 9.7%  |
| TUBA6        | 84790  | 14.3% | 8.3%  | 6.7%  | 9.8%  |
| MLL4         | 9757   | 13.6% | 2.5%  | 13.3% | 9.8%  |
| KATNB1       | 10300  | 5.4%  | 16.3% | 7.6%  | 9.8%  |
| G10          | 8896   | 6.0%  | 7.2%  | 16.2% | 9.8%  |
| MS4A2        | 2206   | 9.2%  | 2.7%  | 17.5% | 9.8%  |
| NPDC1        | 56654  | 15.3% | 2.4%  | 11.7% | 9.8%  |
| MAN1C1       | 57134  | 14.7% | 12.3% | 2.4%  | 9.8%  |
| SOD2         | 6648   | 15.2% | 6.4%  | 8.0%  | 9.8%  |
| COX6A1       | 1337   | 14.6% | 8.8%  | 6.1%  | 9.9%  |
| KIAA1536     | 57658  | 8.2%  | 3.3%  | 18.0% | 9.9%  |
| FARS2        | 10667  | 13.2% | 8.8%  | 7.6%  | 9.9%  |
| LTA          | 4049   | 7.1%  | 9.5%  | 12.9% | 9.9%  |
| ANKFY1       | 51479  | 7.7%  | 5.3%  | 16.7% | 9.9%  |
| FLJ00060     | 90011  | 7.7%  | 5.9%  | 16.1% | 9.9%  |
| BRI3BP       | 140707 | 3.3%  | 10.1% | 16.3% | 9.9%  |
| ELF4         | 2000   | 14.3% | 0.0%  | 15.4% | 9.9%  |
| LRRN5        | 10446  | 14.4% | 11.6% | 3.7%  | 9.9%  |
| K6IRS2       | 140807 | 12.0% | 7.2%  | 10.6% | 9.9%  |
| SFXN4        | 119559 | 8.8%  | 2.8%  | 18.3% | 10.0% |
| MGC61598     | 441478 | 11.3% | 6.8%  | 11.7% | 10.0% |
| ESR1         | 2099   | 0.0%  | 7.1%  | 22.7% | 10.0% |
| GAJ          | 84057  | 5.4%  | 4.9%  | 19.6% | 10.0% |
| MAT2A        | 4144   | 30.0% | 0.0%  | 0.0%  | 10.0% |
| SYNGR4       | 23546  | 0.0%  | 13.3% | 16.7% | 10.0% |
| HUWE1        | 10075  | 8.2%  | 7.1%  | 14.7% | 10.0% |
| KIAA1007     | 23019  | 9.0%  | 4.8%  | 16.3% | 10.0% |
| NPIP         | 9284   | 6.5%  | 12.3% | 11.3% | 10.0% |
| MGC15730     | 84966  | 10.0% | 3.4%  | 16.7% | 10.0% |
| NTHL1        | 4913   | 5.6%  | 16.4% | 8.1%  | 10.0% |
| LOC203427    | 203427 | 12.5% | 0.0%  | 17.6% | 10.0% |
| MGC13272     | 84315  | 12.0% | 7.0%  | 11.1% | 10.1% |
| GJB6         | 10804  | 14.4% | 1.1%  | 14.7% | 10.1% |
| VDAC2        | 7417   | 17.1% | 3.8%  | 9.4%  | 10.1% |
| PHF5A        | 84844  | 19.1% | 6.7%  | 4.5%  | 10.1% |
| HNRPH1       | 3187   | 15.5% | 5.9%  | 8.8%  | 10.1% |
| SLC5A10      | 125206 | 22.7% | 4.3%  | 3.2%  | 10.1% |
| KA35         | 390792 | 9.2%  | 9.3%  | 11.8% | 10.1% |
| KCNS2        | 3788   | 13.3% | 7.3%  | 9.8%  | 10.1% |
| FLJ36335     | 89766  | 22.7% | 0.0%  | 7.7%  | 10.1% |
| CHST7        | 56548  | 5.3%  | 17.0% | 8.2%  | 10.1% |
| DGKA         | 1606   | 2.5%  | 10.4% | 17.5% | 10.1% |
| RPS4Y2       | 140032 | 4.7%  | 8.4%  | 17.4% | 10.2% |
| hCG_1794298  | 728858 | 4.7%  | 10.6% | 15.2% | 10.2% |
| APOE         | 348    | 11.1% | 8.3%  | 11.1% | 10.2% |
| MANEA        | 79694  | 3.8%  | 10.5% | 16.2% | 10.2% |
| ILVBL        | 10994  | 16.7% | 1.9%  | 12.1% | 10.2% |
| ATP6AP1      | 537    | 13.2% | 6.2%  | 11.3% | 10.2% |
| BIRC2        | 329    | 14.8% | 7.0%  | 8.9%  | 10.2% |
| EB-1         | 56899  | 11.1% | 7.1%  | 12.5% | 10.3% |
| ZNF364       | 27246  | 30.8% | 0.0%  | 0.0%  | 10.3% |
| FKSG14       | 64105  | 7.4%  | 2.4%  | 21.1% | 10.3% |
| LOC163590    | 163590 | 10.5% | 8.4%  | 11.9% | 10.3% |
| RUVBL1       | 8607   | 12.5% | 12.5% | 5.9%  | 10.3% |
| TALDO1       | 6888   | 21.6% | 1.4%  | 7.9%  | 10.3% |
| CCDC5        | 115106 | 13.8% | 7.7%  | 9.4%  | 10.3% |
| BDP1         | 55814  | 14.3% | 0.0%  | 16.7% | 10.3% |
| C1QTNF7      | 114905 | 15.2% | 0.0%  | 15.9% | 10.4% |
| PTGFRN       | 5738   | 11.6% | 3.5%  | 16.0% | 10.4% |
| FLJ45778     | 374872 | 6.6%  | 2.3%  | 22.3% | 10.4% |
| IDH3B        | 3420   | 23.5% | 5.0%  | 2.7%  | 10.4% |
| ADARB2       | 105    | 0.0%  | 0.0%  | 31.3% | 10.4% |
| GPR20        | 2843   | 12.9% | 11.0% | 7.3%  | 10.4% |
| IGLL1        | 3543   | 13.6% | 9.5%  | 8.2%  | 10.5% |
| CDC25A       | 993    | 8.9%  | 13.0% | 9.4%  | 10.5% |
| PX19         | 27166  | 9.5%  | 4.6%  | 17.3% | 10.5% |
| LG13         | 203190 | 13.3% | 10.0% | 8.1%  | 10.5% |
| RASAL2       | 9462   | 10.6% | 12.3% | 8.5%  | 10.5% |
| IL1RAP       | 3556   | 8.9%  | 8.9%  | 13.7% | 10.5% |
| SSTR4        | 6754   | 3.3%  | 4.9%  | 23.4% | 10.5% |
| GALNTL2      | 117248 | 16.1% | 2.5%  | 13.0% | 10.5% |
| NFIB         | 4781   | 20.3% | 4.1%  | 7.2%  | 10.5% |

|           |           |       |       |       |       |
|-----------|-----------|-------|-------|-------|-------|
| OR10G9    | 219870    | 9.9%  | 8.5%  | 13.2% | 10.5% |
| MIZF      | 25988     | 9.3%  | 12.3% | 10.1% | 10.5% |
| BHMT      | 635       | 10.4% | 13.6% | 7.7%  | 10.6% |
| LOC81558  | 81558     | 7.8%  | 9.7%  | 14.2% | 10.6% |
| GAD1      | 2571      | 3.0%  | 8.7%  | 20.0% | 10.6% |
| PLA2G4B   | 100137049 | 20.0% | 0.0%  | 11.8% | 10.6% |
| ITGAD     | 3681      | 14.3% | 0.0%  | 17.5% | 10.6% |
| RNF130    | 55819     | 10.4% | 9.2%  | 12.1% | 10.6% |
| SCTR      | 6344      | 11.5% | 7.4%  | 13.0% | 10.6% |
| FOXD4     | 2298      | 13.2% | 3.6%  | 15.0% | 10.6% |
| ISLZ      | 64843     | 17.6% | 0.0%  | 14.3% | 10.6% |
| C20ORF129 | 81610     | 21.9% | 10.2% | 0.0%  | 10.7% |
| MGC29463  | 202052    | 14.3% | 8.9%  | 8.9%  | 10.7% |
| ZFYVE9    | 9372      | 10.9% | 6.8%  | 14.4% | 10.7% |
| TZFP      | 27033     | 7.1%  | 5.7%  | 19.3% | 10.7% |
| CRTAM     | 56253     | 16.7% | 8.3%  | 7.1%  | 10.7% |
| MGC10433  | 79171     | 3.1%  | 5.3%  | 23.8% | 10.7% |
| CYP19A1   | 1588      | 12.4% | 8.6%  | 11.2% | 10.7% |
| GRCC10    | 113246    | 6.3%  | 7.4%  | 18.5% | 10.7% |
| CYP21A2   | 1589      | 23.6% | 0.0%  | 8.6%  | 10.7% |
| LOC284106 | 284106    | 3.0%  | 14.3% | 14.9% | 10.7% |
| MOBK12A   | 126308    | 5.1%  | 5.1%  | 22.1% | 10.8% |
| BTG2      | 7832      | 20.0% | 2.5%  | 9.8%  | 10.8% |
| CHST12    | 55501     | 13.4% | 3.9%  | 15.0% | 10.8% |
| PDCD7     | 10081     | 7.8%  | 6.1%  | 18.4% | 10.8% |
| FOXD2     | 2306      | 20.0% | 5.0%  | 7.4%  | 10.8% |
| SNTG1     | 54212     | 9.4%  | 8.9%  | 14.0% | 10.8% |
| NSMCE1    | 197370    | 11.5% | 8.3%  | 12.5% | 10.8% |
| DPF1      | 8193      | 12.9% | 10.8% | 8.7%  | 10.8% |
| FLJ12806  | 64853     | 3.4%  | 11.7% | 17.4% | 10.8% |
| CUL2      | 8453      | 14.6% | 0.0%  | 17.8% | 10.8% |
| C6ORF146  | 222826    | 12.2% | 8.5%  | 11.7% | 10.8% |
| MYLK      | 4638      | 0.0%  | 14.3% | 18.2% | 10.8% |
| PPARD     | 5467      | 5.6%  | 12.0% | 14.9% | 10.8% |
| BHD       | 201163    | 7.5%  | 5.4%  | 19.6% | 10.8% |
| NCBP1     | 4686      | 17.6% | 9.1%  | 5.8%  | 10.8% |
| LOC124773 | 124773    | 12.8% | 7.2%  | 12.5% | 10.9% |
| ASE-1     | 10849     | 11.2% | 4.4%  | 17.0% | 10.9% |
| TNFRSF13C | 115650    | 11.1% | 8.8%  | 12.7% | 10.9% |
| IPO13     | 9670      | 16.3% | 10.8% | 5.5%  | 10.9% |
| FLJ12998  | 64779     | 3.7%  | 1.1%  | 27.8% | 10.9% |
| SLC17A3   | 10786     | 10.5% | 4.7%  | 17.4% | 10.9% |
| FLJ32011  | 148930    | 3.0%  | 3.1%  | 26.6% | 10.9% |
| ELN       | 2006      | 0.0%  | 7.7%  | 25.0% | 10.9% |
| SHFM1     | 7979      | 23.2% | 1.8%  | 7.7%  | 10.9% |
| XDH       | 7498      | 11.2% | 12.4% | 9.2%  | 10.9% |
| FLJ14490  | 84879     | 6.9%  | 7.6%  | 18.3% | 10.9% |
| PKIG      | 11142     | 10.7% | 6.5%  | 15.6% | 10.9% |
| SYTL5     | 94122     | 15.5% | 6.4%  | 11.0% | 11.0% |
| RNF113A   | 7737      | 21.7% | 8.8%  | 2.4%  | 11.0% |
| D21S2056E | 8568      | 9.6%  | 11.8% | 11.5% | 11.0% |
| BMI1      | 648       | 13.3% | 10.3% | 9.4%  | 11.0% |
| INH1A     | 3623      | 10.0% | 7.4%  | 15.6% | 11.0% |
| FBXO41    | 150726    | 17.0% | 3.3%  | 12.6% | 11.0% |
| PICALM    | 8301      | 21.4% | 4.5%  | 7.1%  | 11.0% |
| MGC26963  | 166929    | 4.7%  | 15.1% | 13.2% | 11.0% |
| IGF2      | 3481      | 13.9% | 5.6%  | 13.7% | 11.0% |
| UNQ739    | 375567    | 0.0%  | 9.1%  | 24.0% | 11.0% |
| EYA2      | 2139      | 10.6% | 9.3%  | 13.2% | 11.0% |
| RGS20     | 8601      | 8.0%  | 5.1%  | 20.1% | 11.1% |
| ELAC1     | 55520     | 13.5% | 4.6%  | 15.1% | 11.1% |
| GHRL      | 51738     | 10.5% | 5.0%  | 17.7% | 11.1% |
| DLL4      | 54567     | 0.0%  | 21.7% | 11.5% | 11.1% |
| FLJ90805  | 284339    | 8.1%  | 7.7%  | 17.5% | 11.1% |
| MGEA5     | 10724     | 6.6%  | 15.2% | 11.5% | 11.1% |
| ZNF619    | 285267    | 0.0%  | 0.0%  | 33.3% | 11.1% |
| NXF1      | 10482     | 0.0%  | 0.0%  | 33.3% | 11.1% |
| XAB2      | 56949     | 33.3% | 0.0%  | 0.0%  | 11.1% |
| EFNB1     | 1947      | 16.7% | 0.0%  | 16.7% | 11.1% |
| CPSF3     | 51692     | 6.0%  | 18.3% | 9.1%  | 11.1% |
| KCNMB1    | 3779      | 10.1% | 8.3%  | 14.9% | 11.1% |
| C9ORF115  | 138428    | 18.6% | 2.7%  | 12.1% | 11.1% |
| NTSR2     | 23620     | 10.3% | 5.5%  | 17.6% | 11.1% |
| ANGPTL3   | 27329     | 7.5%  | 15.1% | 10.9% | 11.2% |
| SEMA3F    | 6405      | 5.0%  | 13.5% | 15.0% | 11.2% |
| SFXN5     | 94097     | 10.0% | 12.6% | 10.9% | 11.2% |
| TEAD2     | 8463      | 18.1% | 9.5%  | 5.9%  | 11.2% |
| KRT24     | 192666    | 12.9% | 10.2% | 10.4% | 11.2% |
| COPS8     | 10920     | 0.0%  | 15.8% | 17.8% | 11.2% |
| FLJ22353  | 79639     | 12.4% | 4.1%  | 17.0% | 11.2% |
| AF15Q14   | 57082     | 9.1%  | 8.3%  | 16.1% | 11.2% |
| SOAT2     | 8435      | 24.5% | 1.2%  | 7.9%  | 11.2% |
| RPA1      | 6117      | 6.8%  | 13.2% | 13.6% | 11.2% |
| LBH       | 81606     | 22.0% | 0.0%  | 11.7% | 11.2% |
| PBX3      | 5090      | 16.7% | 4.6%  | 12.4% | 11.2% |
| TM4SF19   | 116211    | 17.4% | 10.0% | 6.3%  | 11.2% |
| SIL       | 6491      | 15.2% | 12.8% | 5.8%  | 11.2% |
| CGI-37    | 51388     | 6.9%  | 12.7% | 14.1% | 11.2% |
| ENO1      | 2023      | 11.0% | 6.6%  | 16.1% | 11.2% |
| CGI-128   | 51647     | 6.8%  | 11.3% | 15.7% | 11.3% |
| PERQ1     | 64599     | 8.8%  | 14.8% | 10.2% | 11.3% |
| MGC33407  | 284382    | 7.8%  | 11.8% | 14.3% | 11.3% |
| SLC35A5   | 55032     | 10.0% | 9.5%  | 14.3% | 11.3% |
| SNAPC3    | 6619      | 14.3% | 9.3%  | 10.3% | 11.3% |
| LOC200159 | 200159    | 11.8% | 5.4%  | 16.7% | 11.3% |
| EDG2      | 1902      | 0.0%  | 12.5% | 21.4% | 11.3% |
| CPSF2     | 53981     | 25.9% | 4.5%  | 3.6%  | 11.3% |
| IL15RA    | 3601      | 8.1%  | 15.6% | 10.2% | 11.3% |

|           |        |       |       |       |       |
|-----------|--------|-------|-------|-------|-------|
| NRAS      | 4893   | 12.9% | 0.0%  | 21.1% | 11.3% |
| YAP       | 55249  | 6.8%  | 14.1% | 13.1% | 11.3% |
| FLJ22531  | 79703  | 11.7% | 5.5%  | 16.8% | 11.3% |
| LOC126374 | 126374 | 5.0%  | 7.1%  | 21.9% | 11.3% |
| SDF2      | 6388   | 2.3%  | 13.9% | 17.8% | 11.3% |
| HSPA5     | 3309   | 19.0% | 0.0%  | 15.0% | 11.3% |
| NR0B2     | 8431   | 15.0% | 7.8%  | 11.2% | 11.4% |
| SERPINC1  | 462    | 6.3%  | 14.3% | 13.4% | 11.4% |
| LOC144245 | 144245 | 20.0% | 5.0%  | 9.2%  | 11.4% |
| IL28A     | 282616 | 14.3% | 5.9%  | 13.9% | 11.4% |
| CCL23     | 6368   | 1.9%  | 10.4% | 21.8% | 11.4% |
| MGC15631  | 84839  | 12.1% | 6.2%  | 15.9% | 11.4% |
| PAK7      | 57144  | 9.8%  | 15.4% | 9.0%  | 11.4% |
| COX7C     | 1350   | 17.4% | 7.9%  | 8.9%  | 11.4% |
| TIP120A   | 55832  | 2.7%  | 13.0% | 18.5% | 11.4% |
| MGC14141  | 85014  | 5.4%  | 10.9% | 17.9% | 11.4% |
| STARD3    | 10948  | 4.6%  | 11.5% | 18.2% | 11.4% |
| RNF38     | 152006 | 21.2% | 5.3%  | 7.8%  | 11.4% |
| GN5       | 2787   | 0.0%  | 11.5% | 22.7% | 11.4% |
| ITGB4     | 3691   | 15.4% | 6.4%  | 12.4% | 11.4% |
| RAB27A    | 5873   | 20.3% | 4.6%  | 9.4%  | 11.4% |
| C10ORF86  | 54780  | 6.8%  | 15.4% | 12.1% | 11.4% |
| PANK4     | 55229  | 15.3% | 9.6%  | 9.5%  | 11.5% |
| GM2A      | 2760   | 13.1% | 11.9% | 9.4%  | 11.5% |
| MC3R      | 4159   | 13.6% | 13.6% | 7.1%  | 11.5% |
| ABC9      | 23457  | 6.7%  | 10.5% | 17.2% | 11.5% |
| ADRB1     | 153    | 8.5%  | 11.3% | 14.7% | 11.5% |
| FLJ20582  | 54989  | 10.4% | 6.4%  | 17.5% | 11.5% |
| SCAMP2    | 10066  | 16.1% | 9.1%  | 9.2%  | 11.5% |
| FLJ20296  | 54884  | 12.5% | 6.3%  | 15.6% | 11.5% |
| DDX42     | 11325  | 11.1% | 8.7%  | 14.7% | 11.5% |
| LOC57821  | 57821  | 8.0%  | 4.8%  | 21.7% | 11.5% |
| LCE2C     | 353140 | 12.0% | 3.5%  | 19.1% | 11.5% |
| LYZL6     | 57151  | 15.8% | 5.9%  | 12.9% | 11.5% |
| LOC148418 | 148418 | 12.4% | 5.3%  | 16.8% | 11.5% |
| GGT1      | 2678   | 26.3% | 0.0%  | 8.3%  | 11.5% |
| ATOH8     | 84913  | 10.3% | 6.2%  | 18.2% | 11.6% |
| CLTCL1    | 8218   | 19.5% | 2.8%  | 12.4% | 11.6% |
| NXT1      | 29107  | 19.0% | 8.2%  | 7.4%  | 11.6% |
| KLRC3     | 3823   | 10.6% | 11.4% | 12.6% | 11.6% |
| CSTF1     | 1477   | 16.2% | 8.8%  | 9.8%  | 11.6% |
| CSF2      | 1437   | 19.1% | 2.5%  | 13.1% | 11.6% |
| NCF2      | 4688   | 9.9%  | 5.0%  | 19.9% | 11.6% |
| SMYD3     | 64754  | 12.5% | 0.0%  | 22.2% | 11.6% |
| OR10S1    | 219873 | 22.2% | 0.0%  | 12.5% | 11.6% |
| CILP2     | 148113 | 16.0% | 6.5%  | 12.2% | 11.6% |
| OPLAH     | 26873  | 15.3% | 2.5%  | 17.0% | 11.6% |
| DUSP15    | 128853 | 9.0%  | 20.0% | 5.8%  | 11.6% |
| CLIC4     | 25932  | 22.6% | 3.5%  | 8.8%  | 11.6% |
| LOC414059 | 414059 | 13.1% | 6.3%  | 15.5% | 11.6% |
| IL20RA    | 53832  | 12.0% | 10.8% | 12.2% | 11.6% |
| NPHP1     | 4867   | 8.9%  | 15.2% | 10.9% | 11.7% |
| CKAP4     | 10970  | 12.6% | 6.7%  | 15.6% | 11.7% |
| ACSL1     | 2180   | 12.4% | 8.2%  | 14.4% | 11.7% |
| F8A3      | 474384 | 13.2% | 11.1% | 10.7% | 11.7% |
| FLJ34283  | 347862 | 10.2% | 4.8%  | 20.0% | 11.7% |
| ATP6V1H   | 51606  | 13.2% | 8.2%  | 13.7% | 11.7% |
| SNPH      | 9751   | 0.0%  | 21.7% | 13.3% | 11.7% |
| QSCN6     | 5768   | 11.5% | 11.5% | 12.2% | 11.7% |
| LMBR1L    | 55716  | 11.1% | 14.3% | 9.7%  | 11.7% |
| ARL10A    | 285598 | 8.2%  | 6.1%  | 20.8% | 11.7% |
| NBS1      | 4683   | 18.1% | 7.2%  | 9.9%  | 11.7% |
| OR2A1     | 346528 | 10.6% | 12.9% | 11.7% | 11.7% |
| C16orf50  | 84229  | 11.2% | 10.8% | 13.3% | 11.8% |
| ZBTB12    | 221527 | 14.3% | 0.0%  | 21.1% | 11.8% |
| CALB2     | 794    | 21.1% | 4.6%  | 9.7%  | 11.8% |
| SLC26A8   | 116369 | 7.9%  | 8.3%  | 19.2% | 11.8% |
| EDG5      | 9294   | 15.6% | 0.0%  | 19.8% | 11.8% |
| RGR       | 5995   | 4.3%  | 19.6% | 11.4% | 11.8% |
| MOC52     | 4338   | 27.4% | 8.0%  | 0.0%  | 11.8% |
| CER1      | 9350   | 11.0% | 10.2% | 14.3% | 11.8% |
| U2AF2     | 11338  | 27.5% | 6.6%  | 1.5%  | 11.8% |
| AMPD2     | 271    | 10.9% | 11.3% | 13.4% | 11.8% |
| YIF1      | 10897  | 5.1%  | 16.1% | 14.3% | 11.8% |
| HKR3      | 3104   | 15.2% | 4.6%  | 15.8% | 11.9% |
| PRKCSH    | 5589   | 17.3% | 8.8%  | 9.5%  | 11.9% |
| MFRP      | 83552  | 16.7% | 6.3%  | 12.6% | 11.9% |
| FLJ22419  | 79750  | 14.7% | 3.9%  | 17.0% | 11.9% |
| RPS17     | 6218   | 0.0%  | 12.5% | 23.1% | 11.9% |
| MGC4504   | 79094  | 7.1%  | 7.2%  | 21.3% | 11.9% |
| C20ORF22  | 26090  | 11.8% | 9.8%  | 14.0% | 11.9% |
| GRID2     | 2895   | 18.3% | 2.9%  | 14.4% | 11.9% |
| CDK9      | 1025   | 5.7%  | 19.0% | 10.9% | 11.9% |
| ADH5      | 128    | 20.4% | 4.0%  | 11.3% | 11.9% |
| LOC257177 | 257177 | 9.9%  | 10.1% | 15.6% | 11.9% |
| IDH3G     | 3421   | 11.1% | 5.3%  | 19.2% | 11.9% |
| OR111     | 126370 | 10.9% | 8.7%  | 16.2% | 11.9% |
| GMNN      | 51053  | 30.8% | 0.0%  | 5.0%  | 11.9% |
| SLC26A9   | 115019 | 18.7% | 7.4%  | 9.7%  | 11.9% |
| TGFB2     | 7042   | 13.6% | 8.7%  | 13.5% | 11.9% |
| MYH3      | 4621   | 16.1% | 7.1%  | 12.6% | 11.9% |
| MGC10204  | 126133 | 13.6% | 6.6%  | 15.6% | 11.9% |
| THOC4     | 10189  | 2.0%  | 6.3%  | 27.5% | 12.0% |
| MGC17624  | 404550 | 6.6%  | 2.2%  | 27.1% | 12.0% |
| P66ALPHA  | 54815  | 14.4% | 3.8%  | 17.6% | 12.0% |
| TP53NP2   | 58476  | 2.2%  | 20.3% | 13.4% | 12.0% |
| G6PD      | 2539   | 15.8% | 10.7% | 9.4%  | 12.0% |
| GTF2A2    | 2958   | 10.5% | 5.8%  | 19.8% | 12.0% |



|           |        |       |       |       |       |
|-----------|--------|-------|-------|-------|-------|
| F8A2      | 474383 | 23.3% | 7.0%  | 5.7%  | 12.0% |
| MCC       | 4163   | 10.9% | 14.3% | 10.9% | 12.0% |
| KIAA0073  | 23398  | 10.9% | 8.2%  | 17.0% | 12.0% |
| HOXB7     | 3217   | 5.3%  | 9.4%  | 21.4% | 12.0% |
| IL17E     | 64806  | 9.0%  | 3.6%  | 23.6% | 12.0% |
| C6ORF106  | 64771  | 6.8%  | 11.0% | 18.3% | 12.0% |
| MLN       | 4295   | 9.7%  | 10.2% | 16.3% | 12.1% |
| PLRG1     | 5356   | 22.2% | 11.1% | 2.9%  | 12.1% |
| LOC200008 | 200008 | 11.1% | 4.5%  | 20.6% | 12.1% |
| BRE       | 9577   | 3.9%  | 25.8% | 6.5%  | 12.1% |
| LASS4     | 79603  | 11.9% | 9.2%  | 15.2% | 12.1% |
| SLC7A4    | 6545   | 10.4% | 6.9%  | 18.9% | 12.1% |
| DLG7      | 9787   | 11.9% | 16.8% | 7.6%  | 12.1% |
| ZNF366    | 167465 | 16.0% | 12.2% | 8.1%  | 12.1% |
| B3GAT2    | 135152 | 16.4% | 7.7%  | 12.2% | 12.1% |
| C10ORF46  | 143384 | 14.4% | 6.4%  | 15.6% | 12.1% |
| MKI67IP   | 84365  | 23.1% | 13.3% | 0.0%  | 12.1% |
| GTFA3     | 2971   | 18.9% | 5.7%  | 11.8% | 12.1% |
| ORS162    | 81282  | 10.2% | 7.9%  | 18.4% | 12.1% |
| THAP4     | 51078  | 8.1%  | 5.7%  | 22.6% | 12.2% |
| KCNK16    | 83795  | 15.9% | 10.6% | 9.9%  | 12.2% |
| CCNC      | 892    | 17.2% | 3.0%  | 16.3% | 12.2% |
| STX5A     | 6811   | 7.5%  | 7.8%  | 21.2% | 12.2% |
| IDH3A     | 3419   | 13.4% | 8.7%  | 14.5% | 12.2% |
| SPSB4     | 92369  | 10.2% | 9.3%  | 17.1% | 12.2% |
| PFTK1     | 5218   | 9.3%  | 12.6% | 14.7% | 12.2% |
| FBXO30    | 84085  | 16.3% | 6.6%  | 13.7% | 12.2% |
| GPR109A   | 338442 | 8.5%  | 18.6% | 9.5%  | 12.2% |
| CGI-116   | 51019  | 10.0% | 5.8%  | 20.8% | 12.2% |
| UBE2E2    | 7325   | 12.1% | 10.9% | 13.5% | 12.2% |
| TNIP3     | 79931  | 13.3% | 14.3% | 9.0%  | 12.2% |
| DPP3      | 10072  | 16.2% | 8.8%  | 11.5% | 12.2% |
| LGALS3BP  | 3959   | 26.9% | 3.8%  | 5.8%  | 12.2% |
| RPS27A    | 6233   | 12.0% | 12.8% | 11.8% | 12.2% |
| ZBTB38    | 253461 | 14.3% | 8.6%  | 13.7% | 12.2% |
| G0S2      | 50486  | 8.3%  | 11.6% | 16.7% | 12.2% |
| FLJ20343  | 54902  | 21.2% | 6.3%  | 9.1%  | 12.2% |
| LOC130355 | 130355 | 14.2% | 11.0% | 11.5% | 12.2% |
| ZNF136    | 7695   | 11.7% | 20.0% | 5.0%  | 12.2% |
| ORS1T1    | 401665 | 16.7% | 0.0%  | 20.0% | 12.2% |
| MAGEE1    | 57692  | 20.0% | 0.0%  | 16.7% | 12.2% |
| PRKCI     | 5584   | 9.2%  | 9.2%  | 18.3% | 12.2% |
| ACTB      | 60     | 15.4% | 15.0% | 6.4%  | 12.2% |
| PPEF2     | 5470   | 20.9% | 9.5%  | 6.3%  | 12.3% |
| LOC125704 | 125704 | 20.7% | 5.4%  | 10.6% | 12.3% |
| LOC136306 | 136306 | 7.1%  | 4.7%  | 25.0% | 12.3% |
| CYP11B2   | 1585   | 10.5% | 11.3% | 15.0% | 12.3% |
| PPARG     | 5468   | 14.9% | 11.9% | 10.0% | 12.3% |
| MIRGPRX1  | 259249 | 14.3% | 9.0%  | 13.5% | 12.3% |
| FLJ25530  | 220296 | 8.2%  | 10.9% | 17.8% | 12.3% |
| CSNK1A1L  | 122011 | 11.6% | 10.6% | 14.6% | 12.3% |
| ONCUT1    | 3175   | 12.4% | 10.6% | 13.9% | 12.3% |
| PTK2B     | 2185   | 12.7% | 11.1% | 13.1% | 12.3% |
| KIAA1862  | 84626  | 6.0%  | 15.8% | 15.2% | 12.3% |
| CLCA3     | 9629   | 16.4% | 6.4%  | 14.1% | 12.3% |
| FLJ21075  | 80099  | 0.0%  | 0.0%  | 37.0% | 12.3% |
| CCT3      | 7203   | 8.7%  | 0.0%  | 28.3% | 12.3% |
| LOC338328 | 338328 | 12.3% | 10.3% | 14.4% | 12.3% |
| ZNF219    | 51222  | 17.6% | 10.5% | 8.8%  | 12.3% |
| CEPT1     | 10390  | 19.4% | 2.6%  | 15.0% | 12.3% |
| C10ORF22  | 80267  | 6.3%  | 7.7%  | 23.1% | 12.3% |
| ARC92     | 81857  | 3.4%  | 8.9%  | 24.7% | 12.3% |
| GRIK4     | 2900   | 13.2% | 8.3%  | 15.5% | 12.4% |
| FAM24B    | 196792 | 15.4% | 2.8%  | 18.9% | 12.4% |
| TGIF      | 7050   | 17.5% | 8.6%  | 11.1% | 12.4% |
| ABHD1     | 84696  | 12.3% | 4.9%  | 19.9% | 12.4% |
| SH2B      | 25970  | 12.8% | 6.4%  | 18.0% | 12.4% |
| NEU1      | 4758   | 12.4% | 8.4%  | 16.4% | 12.4% |
| LNK2      | 222484 | 18.0% | 4.0%  | 15.2% | 12.4% |
| LEPRE1    | 64175  | 12.1% | 5.5%  | 19.7% | 12.4% |
| MMAB      | 326625 | 10.3% | 9.6%  | 17.3% | 12.4% |
| ABCB6     | 10058  | 16.3% | 7.4%  | 13.6% | 12.4% |
| CROCC     | 9696   | 13.0% | 4.7%  | 19.6% | 12.4% |
| IKBKE     | 9641   | 10.4% | 10.7% | 16.3% | 12.4% |
| ZFP67     | 51043  | 21.2% | 7.0%  | 9.1%  | 12.4% |
| KIAA1441  | 57592  | 6.7%  | 5.1%  | 25.5% | 12.4% |
| LR8       | 28959  | 10.0% | 2.3%  | 25.0% | 12.4% |
| KIAA0669  | 9819   | 5.3%  | 20.6% | 11.5% | 12.4% |
| MGC33584  | 285971 | 8.7%  | 8.4%  | 20.2% | 12.5% |
| PCSK9     | 255738 | 19.8% | 10.4% | 7.1%  | 12.5% |
| SLC35E4   | 339665 | 20.0% | 10.5% | 6.9%  | 12.5% |
| NFE2      | 4778   | 14.9% | 8.8%  | 13.7% | 12.5% |
| HLA-DPB1  | 3115   | 15.4% | 1.6%  | 20.5% | 12.5% |
| SLC14A2   | 8170   | 20.4% | 8.2%  | 8.9%  | 12.5% |
| LRP11     | 84918  | 15.9% | 10.4% | 11.3% | 12.5% |
| SSTR3     | 6753   | 14.7% | 10.8% | 12.1% | 12.5% |
| GMPS      | 8833   | 23.6% | 6.0%  | 7.9%  | 12.5% |
| MRPL46    | 26589  | 3.8%  | 11.7% | 22.1% | 12.5% |
| B7        | 10233  | 13.9% | 9.1%  | 14.6% | 12.5% |
| CHAD      | 1101   | 23.2% | 4.2%  | 10.3% | 12.5% |
| RPS12     | 6206   | 8.3%  | 11.1% | 18.2% | 12.5% |
| SDK1      | 221935 | 16.7% | 7.8%  | 13.2% | 12.5% |
| MGC33329  | 256979 | 9.6%  | 5.8%  | 22.3% | 12.6% |
| ORC6L     | 23594  | 0.0%  | 33.3% | 4.3%  | 12.6% |
| ALS2CR12  | 130540 | 13.7% | 13.6% | 10.3% | 12.6% |
| MTF1      | 4520   | 17.9% | 1.8%  | 18.0% | 12.6% |
| SMPD2     | 6610   | 14.6% | 12.9% | 10.2% | 12.6% |
| THOC2     | 57187  | 8.9%  | 7.4%  | 21.4% | 12.6% |

|              |        |       |       |       |       |
|--------------|--------|-------|-------|-------|-------|
| PP3856       | 93100  | 29.4% | 8.3%  | 0.0%  | 12.6% |
| FLJ22173     | 80111  | 11.4% | 7.4%  | 19.0% | 12.6% |
| PKIB         | 5570   | 19.4% | 10.8% | 7.6%  | 12.6% |
| KCNIP4       | 80333  | 21.5% | 3.0%  | 13.3% | 12.6% |
| WNT4         | 54361  | 0.0%  | 7.1%  | 30.6% | 12.6% |
| HSPC009      | 28958  | 5.2%  | 8.4%  | 24.2% | 12.6% |
| FLJ32452     | 93058  | 2.3%  | 16.1% | 19.5% | 12.6% |
| FLJ39630     | 286183 | 11.0% | 5.3%  | 21.6% | 12.6% |
| WBSCR5       | 7462   | 13.6% | 2.1%  | 22.1% | 12.6% |
| GMPPB        | 29925  | 10.5% | 17.5% | 9.8%  | 12.6% |
| DBR1         | 51163  | 21.3% | 8.9%  | 7.7%  | 12.6% |
| GPR35        | 2859   | 10.3% | 7.4%  | 20.2% | 12.6% |
| ZNF91        | 7644   | 5.9%  | 13.0% | 19.0% | 12.7% |
| FAM108A2     | 653401 | 27.2% | 4.4%  | 6.4%  | 12.7% |
| FLJ10496     | 55152  | 7.0%  | 6.1%  | 24.9% | 12.7% |
| DPYSL2       | 1808   | 26.4% | 8.9%  | 2.7%  | 12.7% |
| PC326        | 55827  | 11.2% | 12.5% | 14.3% | 12.7% |
| VGLL1        | 51442  | 16.7% | 21.4% | 0.0%  | 12.7% |
| BIRC5        | 332    | 11.6% | 10.4% | 16.1% | 12.7% |
| RASL12       | 51285  | 13.4% | 8.4%  | 16.4% | 12.7% |
| FLJ22175     | 80233  | 20.0% | 0.0%  | 18.2% | 12.7% |
| RPS5         | 6193   | 20.0% | 0.0%  | 18.2% | 12.7% |
| HSPF1        | 3336   | 11.8% | 16.0% | 10.4% | 12.7% |
| GEMIN4       | 50628  | 8.5%  | 9.6%  | 20.1% | 12.7% |
| CBARA1       | 10367  | 10.9% | 13.1% | 14.2% | 12.7% |
| QPR1         | 23475  | 9.9%  | 14.8% | 13.5% | 12.7% |
| STAMBP       | 10617  | 10.8% | 10.7% | 16.7% | 12.7% |
| RPLP0        | 6175   | 15.0% | 20.8% | 2.4%  | 12.8% |
| RGMA         | 56963  | 7.4%  | 13.2% | 17.7% | 12.8% |
| CACNG7       | 59284  | 12.9% | 9.8%  | 15.5% | 12.8% |
| FLJ10081     | 55683  | 20.3% | 14.2% | 3.8%  | 12.8% |
| RP6-166C19.3 | 728082 | 3.6%  | 11.7% | 23.0% | 12.8% |
| LOC197322    | 197322 | 4.9%  | 9.8%  | 23.7% | 12.8% |
| PBX1         | 5087   | 16.7% | 11.0% | 10.7% | 12.8% |
| BLM          | 641    | 12.3% | 5.1%  | 20.9% | 12.8% |
| PWWP1        | 154150 | 15.0% | 8.7%  | 14.6% | 12.8% |
| PTPN9        | 5780   | 8.2%  | 17.7% | 12.5% | 12.8% |
| CCNA1        | 8900   | 8.1%  | 14.7% | 15.5% | 12.8% |
| OR5M11       | 219487 | 22.6% | 11.3% | 4.6%  | 12.8% |
| TMC7         | 79905  | 14.7% | 15.5% | 8.3%  | 12.8% |
| USP37        | 57695  | 17.3% | 8.5%  | 12.7% | 12.8% |
| MGC23280     | 147015 | 34.8% | 0.0%  | 3.7%  | 12.8% |
| GNG8         | 94235  | 8.7%  | 10.5% | 19.4% | 12.9% |
| SPFH2        | 11160  | 13.8% | 7.0%  | 17.8% | 12.9% |
| SIHBP1       | 22827  | 11.0% | 11.0% | 16.7% | 12.9% |
| LIG3         | 3980   | 20.4% | 15.6% | 2.6%  | 12.9% |
| SLC25A21     | 89874  | 2.3%  | 16.7% | 19.7% | 12.9% |
| LOC58489     | 58489  | 14.3% | 6.7%  | 17.7% | 12.9% |
| RNF10        | 9921   | 21.3% | 6.2%  | 11.2% | 12.9% |
| ELAVL4       | 1996   | 13.6% | 8.1%  | 17.0% | 12.9% |
| CDW52        | 1043   | 11.7% | 10.2% | 16.8% | 12.9% |
| FLJ32734     | 146849 | 9.2%  | 10.6% | 18.9% | 12.9% |
| GALNTL4      | 374378 | 13.3% | 14.4% | 11.0% | 12.9% |
| GDNF         | 2668   | 6.6%  | 23.4% | 8.8%  | 12.9% |
| DJ971N18.2   | 56255  | 19.6% | 5.6%  | 13.6% | 12.9% |
| GLCCI1       | 113263 | 14.2% | 11.1% | 13.5% | 12.9% |
| PARC         | 23113  | 22.0% | 5.9%  | 10.9% | 12.9% |
| PLOD         | 5351   | 10.5% | 12.2% | 16.1% | 12.9% |
| GCH1         | 2643   | 5.1%  | 4.7%  | 29.0% | 12.9% |
| RRN3         | 54700  | 23.1% | 8.9%  | 6.9%  | 13.0% |
| GABRG2       | 2566   | 11.4% | 11.3% | 16.1% | 13.0% |
| TTYH1        | 57348  | 27.8% | 3.5%  | 7.7%  | 13.0% |
| BAT5         | 7920   | 4.5%  | 14.8% | 19.6% | 13.0% |
| ADORA3       | 140    | 18.4% | 7.1%  | 13.4% | 13.0% |
| OR1B1        | 347169 | 15.3% | 7.6%  | 16.1% | 13.0% |
| METR1        | 79006  | 12.5% | 16.3% | 10.1% | 13.0% |
| ARG1         | 383    | 18.7% | 9.0%  | 11.4% | 13.0% |
| LOC401940    | 401940 | 14.8% | 3.1%  | 21.2% | 13.0% |
| LDHAL6A      | 160287 | 15.3% | 2.0%  | 21.7% | 13.0% |
| ELA3A        | 10136  | 19.4% | 6.7%  | 13.0% | 13.0% |
| FLJ32356     | 144717 | 11.2% | 14.3% | 13.6% | 13.0% |
| CEECAM1      | 51148  | 31.0% | 4.4%  | 3.7%  | 13.0% |
| CDCAS        | 113130 | 7.7%  | 8.3%  | 23.1% | 13.0% |
| GPR61        | 83873  | 15.7% | 12.5% | 10.9% | 13.0% |
| PEX13        | 5194   | 19.6% | 6.6%  | 12.9% | 13.0% |
| TRIM25       | 7706   | 22.0% | 5.6%  | 11.5% | 13.0% |
| FLJ20272     | 55622  | 9.9%  | 9.3%  | 20.0% | 13.0% |
| MGC14288     | 84987  | 7.1%  | 3.1%  | 28.9% | 13.1% |
| ERCC6        | 2074   | 33.7% | 3.6%  | 1.9%  | 13.1% |
| FLJ25989     | 347516 | 9.0%  | 6.8%  | 23.5% | 13.1% |
| RAB20        | 55647  | 20.6% | 9.3%  | 9.3%  | 13.1% |
| UBE2U        | 148581 | 7.2%  | 14.2% | 17.8% | 13.1% |
| LDLR         | 3949   | 24.6% | 6.7%  | 7.9%  | 13.1% |
| ITGA9        | 3680   | 15.6% | 4.9%  | 18.7% | 13.1% |
| KIAA0685     | 9701   | 9.1%  | 5.9%  | 24.3% | 13.1% |
| PADI2        | 11240  | 12.8% | 17.9% | 8.6%  | 13.1% |
| PTGES        | 9536   | 13.3% | 13.6% | 12.3% | 13.1% |
| YTS21        | 91746  | 9.5%  | 5.3%  | 24.4% | 13.1% |
| ITTC14       | 151613 | 12.0% | 10.9% | 16.4% | 13.1% |
| PTDSR        | 23210  | 0.0%  | 14.3% | 25.0% | 13.1% |
| RPS13        | 6207   | 14.3% | 0.0%  | 25.0% | 13.1% |
| RBM8A        | 9939   | 14.3% | 0.0%  | 25.0% | 13.1% |
| LOC143941    | 143941 | 26.9% | 9.0%  | 3.4%  | 13.1% |
| SCARA3       | 51435  | 16.7% | 9.0%  | 13.6% | 13.1% |
| OR4K2        | 390431 | 16.5% | 6.8%  | 16.1% | 13.1% |
| DNAH7        | 56171  | 13.8% | 10.9% | 14.7% | 13.1% |
| MAP1LC3C     | 440738 | 16.0% | 15.7% | 7.7%  | 13.1% |
| ERF          | 2077   | 24.6% | 7.9%  | 6.8%  | 13.1% |

|              |        |       |       |       |       |
|--------------|--------|-------|-------|-------|-------|
| RYBP         | 23429  | 16.0% | 12.9% | 10.5% | 13.1% |
| ZDHH13       | 54503  | 14.5% | 8.2%  | 16.8% | 13.2% |
| CTXN1        | 404217 | 16.0% | 9.4%  | 14.0% | 13.2% |
| CD79A        | 973    | 17.3% | 11.1% | 11.1% | 13.2% |
| FOSL1        | 8061   | 9.5%  | 13.9% | 16.1% | 13.2% |
| HSPC056      | 25852  | 10.6% | 9.5%  | 19.5% | 13.2% |
| KIAA0431     | 23300  | 11.5% | 14.3% | 13.7% | 13.2% |
| PDZK3        | 23037  | 11.5% | 8.7%  | 19.3% | 13.2% |
| ATG9B        | 285973 | 17.1% | 6.4%  | 16.1% | 13.2% |
| ORC1L        | 4998   | 13.0% | 11.0% | 15.5% | 13.2% |
| RPS24        | 6229   | 33.3% | 0.0%  | 6.3%  | 13.2% |
| NETO1        | 81832  | 17.1% | 12.5% | 10.0% | 13.2% |
| MS4A7        | 58475  | 13.6% | 11.2% | 14.9% | 13.2% |
| STX1B2       | 112755 | 18.8% | 4.0%  | 16.9% | 13.2% |
| ITLN2        | 142683 | 11.5% | 17.6% | 10.5% | 13.2% |
| SIPL         | 55256  | 13.8% | 10.8% | 15.1% | 13.2% |
| MED8         | 112950 | 13.2% | 7.5%  | 19.0% | 13.2% |
| CRK7         | 51755  | 5.7%  | 23.1% | 11.0% | 13.2% |
| RAP2B        | 5912   | 11.7% | 14.8% | 13.2% | 13.2% |
| USH1G        | 124590 | 11.5% | 14.2% | 14.1% | 13.2% |
| PLXNB1       | 5364   | 16.0% | 7.7%  | 16.0% | 13.2% |
| PTPNS1L2     | 128646 | 15.0% | 9.1%  | 15.6% | 13.3% |
| FOXD4L3      | 387054 | 16.7% | 6.8%  | 16.3% | 13.3% |
| MUSTN1       | 389125 | 0.0%  | 9.1%  | 30.8% | 13.3% |
| ATP6VOC      | 527    | 20.5% | 17.5% | 1.9%  | 13.3% |
| TENS1        | 64759  | 22.2% | 0.0%  | 17.6% | 13.3% |
| KRT5         | 3852   | 11.3% | 13.7% | 14.8% | 13.3% |
| SLC37A4      | 2542   | 10.9% | 18.0% | 11.0% | 13.3% |
| KIAA1280     | 55841  | 11.9% | 7.4%  | 20.6% | 13.3% |
| IGFBP7       | 3490   | 10.6% | 9.7%  | 19.6% | 13.3% |
| GTFA2A1      | 2957   | 14.4% | 8.2%  | 17.3% | 13.3% |
| KIAA1906     | 114795 | 7.4%  | 12.5% | 20.1% | 13.3% |
| ATOX1        | 475    | 0.0%  | 0.0%  | 40.0% | 13.3% |
| MAP2K3       | 5606   | 10.8% | 16.3% | 12.9% | 13.3% |
| SOX14        | 8403   | 13.0% | 16.7% | 10.3% | 13.4% |
| ELKS         | 23085  | 10.3% | 4.7%  | 25.0% | 13.4% |
| MAD2L1       | 4085   | 17.4% | 6.7%  | 16.0% | 13.4% |
| BFSP1        | 631    | 10.8% | 6.8%  | 22.4% | 13.4% |
| GRIK5        | 2901   | 17.8% | 10.8% | 11.5% | 13.4% |
| DDEF1L       | 55616  | 13.7% | 10.7% | 15.8% | 13.4% |
| PLXDC2       | 84898  | 18.2% | 11.0% | 10.9% | 13.4% |
| SEMG1        | 6406   | 19.0% | 12.2% | 8.9%  | 13.4% |
| RNF34        | 80196  | 15.5% | 11.8% | 12.8% | 13.4% |
| ELA2A        | 63036  | 17.3% | 7.7%  | 15.1% | 13.4% |
| SCLY         | 51540  | 13.9% | 8.1%  | 18.2% | 13.4% |
| PHF12        | 57649  | 17.7% | 13.3% | 9.1%  | 13.4% |
| MGC35555     | 340419 | 14.7% | 3.2%  | 22.3% | 13.4% |
| FLJ22955     | 79877  | 14.7% | 9.5%  | 16.0% | 13.4% |
| FKSG83       | 83954  | 16.5% | 11.6% | 12.1% | 13.4% |
| MGC8902      | 284565 | 6.0%  | 11.0% | 23.2% | 13.4% |
| HTF9C        | 27037  | 7.7%  | 17.4% | 15.2% | 13.4% |
| FLJ37659     | 286499 | 14.1% | 6.2%  | 20.0% | 13.4% |
| CAPZB        | 832    | 9.4%  | 17.2% | 13.7% | 13.4% |
| SNCAIP       | 9627   | 11.5% | 12.2% | 16.6% | 13.4% |
| USP39        | 10713  | 13.3% | 12.2% | 14.7% | 13.4% |
| SCAP1        | 8631   | 9.3%  | 14.1% | 16.9% | 13.4% |
| SEC22L3      | 9117   | 8.6%  | 5.7%  | 26.1% | 13.4% |
| C20ORF132    | 140699 | 13.1% | 12.9% | 14.3% | 13.4% |
| DKFZP564B167 | 25874  | 16.7% | 7.3%  | 16.4% | 13.4% |
| NALP14       | 338323 | 17.5% | 14.4% | 8.5%  | 13.4% |
| CBLN1L1      | 140689 | 18.5% | 3.7%  | 18.2% | 13.4% |
| SH3GL2       | 6456   | 15.4% | 9.8%  | 15.2% | 13.5% |
| APRT         | 353    | 17.8% | 7.8%  | 14.8% | 13.5% |
| COG4         | 25839  | 16.2% | 7.1%  | 17.1% | 13.5% |
| PRX          | 57716  | 16.7% | 12.5% | 11.3% | 13.5% |
| CNR2         | 1269   | 15.9% | 7.0%  | 17.5% | 13.5% |
| PPM1A        | 5494   | 9.1%  | 18.4% | 12.9% | 13.5% |
| FLJ11806     | 79882  | 15.0% | 5.4%  | 20.0% | 13.5% |
| SPPL3        | 121665 | 14.1% | 18.1% | 8.2%  | 13.5% |
| SIRT5        | 23408  | 15.6% | 7.6%  | 17.3% | 13.5% |
| DKFZP762O076 | 55529  | 18.7% | 8.8%  | 12.9% | 13.5% |
| ANKRD15      | 23189  | 12.1% | 14.0% | 14.4% | 13.5% |
| GRK6         | 2870   | 9.6%  | 13.7% | 17.1% | 13.5% |
| FOXN4        | 121643 | 0.0%  | 22.5% | 18.0% | 13.5% |
| POLR1B       | 84172  | 24.4% | 7.1%  | 9.0%  | 13.5% |
| SMARCD3      | 6604   | 12.9% | 9.8%  | 17.8% | 13.5% |
| KCNQ3        | 3786   | 23.3% | 4.1%  | 13.2% | 13.5% |
| PRPF3        | 9129   | 15.4% | 13.3% | 11.8% | 13.5% |
| AGT          | 183    | 18.8% | 6.9%  | 14.9% | 13.5% |
| ZSIG11       | 51368  | 11.6% | 5.5%  | 23.5% | 13.5% |
| DUPD1        | 338599 | 13.6% | 9.3%  | 17.7% | 13.5% |
| OXT          | 5020   | 9.2%  | 20.0% | 11.4% | 13.5% |
| G6ORF198     | 167838 | 12.4% | 3.5%  | 24.7% | 13.5% |
| DNAJC14      | 85406  | 9.7%  | 18.9% | 12.1% | 13.5% |
| ABHD2        | 11057  | 14.3% | 14.7% | 11.6% | 13.5% |
| NRBF2        | 29982  | 16.9% | 5.9%  | 17.8% | 13.5% |
| PTGS1        | 5742   | 15.7% | 7.9%  | 17.0% | 13.5% |
| H1FOO        | 132243 | 13.2% | 15.3% | 12.2% | 13.5% |
| ARL10B       | 127829 | 10.9% | 7.2%  | 22.6% | 13.5% |
| KRTHA3A      | 3883   | 21.9% | 7.7%  | 11.1% | 13.6% |
| LOC388730    | 388730 | 8.8%  | 6.0%  | 25.9% | 13.6% |
| GPR144       | 347088 | 7.3%  | 15.5% | 17.9% | 13.6% |
| ORS2B2       | 255725 | 23.2% | 9.5%  | 8.0%  | 13.6% |
| KIAA1193     | 54531  | 9.7%  | 0.8%  | 30.1% | 13.6% |
| TNFRSF10A    | 8797   | 24.7% | 7.8%  | 8.3%  | 13.6% |
| TRIP3        | 9326   | 20.2% | 9.5%  | 11.1% | 13.6% |
| PIIG         | 9360   | 10.0% | 16.8% | 14.0% | 13.6% |
| ZNF71        | 58491  | 6.2%  | 14.7% | 19.9% | 13.6% |

|              |        |       |       |       |       |
|--------------|--------|-------|-------|-------|-------|
| LOC115811    | 115811 | 3.9%  | 7.7%  | 29.1% | 13.6% |
| CYP2D6       | 1565   | 24.8% | 8.8%  | 7.2%  | 13.6% |
| PRPF18       | 8559   | 20.0% | 11.8% | 9.0%  | 13.6% |
| CMT4B2       | 81846  | 10.5% | 4.2%  | 26.2% | 13.6% |
| GMRP-1       | 84280  | 20.7% | 5.7%  | 14.4% | 13.6% |
| UBAD1        | 10422  | 13.0% | 10.4% | 17.4% | 13.6% |
| MGC45474     | 126969 | 15.7% | 11.4% | 13.8% | 13.6% |
| LOC401647    | 401647 | 10.0% | 8.5%  | 22.4% | 13.6% |
| SH3GL1       | 6455   | 4.4%  | 15.9% | 20.7% | 13.7% |
| SPACA3       | 124912 | 17.9% | 5.3%  | 17.7% | 13.7% |
| HSU79266     | 29901  | 10.1% | 4.2%  | 26.8% | 13.7% |
| ZNRD1        | 30834  | 18.1% | 9.4%  | 13.6% | 13.7% |
| MCP          | 4179   | 0.0%  | 12.5% | 28.6% | 13.7% |
| NEDD1        | 121441 | 10.9% | 14.8% | 15.3% | 13.7% |
| KRT76        | 51350  | 19.0% | 11.0% | 11.0% | 13.7% |
| DCT          | 1638   | 19.2% | 13.4% | 8.4%  | 13.7% |
| SLC4A2       | 6522   | 17.4% | 12.8% | 10.9% | 13.7% |
| CAMK2B       | 816    | 17.0% | 9.9%  | 14.1% | 13.7% |
| DRD5         | 1816   | 18.8% | 4.2%  | 18.1% | 13.7% |
| DHODH        | 1723   | 19.8% | 13.2% | 8.1%  | 13.7% |
| ASB3         | 51130  | 11.5% | 0.0%  | 29.6% | 13.7% |
| MAFB         | 9935   | 10.0% | 14.3% | 16.9% | 13.7% |
| TM7SF2       | 7108   | 14.1% | 14.9% | 12.2% | 13.7% |
| LOC653282    | 653282 | 19.0% | 4.1%  | 18.1% | 13.7% |
| EXOSC1       | 51013  | 12.8% | 8.7%  | 19.7% | 13.7% |
| TFPT         | 29844  | 3.1%  | 12.4% | 25.7% | 13.7% |
| KIAA0934     | 22982  | 6.7%  | 11.0% | 23.5% | 13.7% |
| WDR5         | 11091  | 8.8%  | 7.8%  | 24.5% | 13.7% |
| TCEAL6       | 158931 | 13.6% | 8.2%  | 19.4% | 13.7% |
| ST7          | 7982   | 11.5% | 15.7% | 14.0% | 13.7% |
| WT1          | 7490   | 11.7% | 14.0% | 15.6% | 13.7% |
| PRIM2A       | 5558   | 23.5% | 12.0% | 5.7%  | 13.8% |
| KLK5         | 25818  | 16.1% | 13.5% | 11.7% | 13.8% |
| C6ORF145     | 221749 | 15.7% | 12.0% | 13.5% | 13.8% |
| PHF6         | 84295  | 16.4% | 8.4%  | 16.5% | 13.8% |
| LCE2A        | 353139 | 8.7%  | 12.7% | 19.9% | 13.8% |
| CCM2         | 83605  | 5.6%  | 13.7% | 21.9% | 13.8% |
| ISL1         | 3670   | 17.1% | 12.3% | 11.9% | 13.8% |
| INTS12       | 57117  | 17.0% | 8.3%  | 16.0% | 13.8% |
| STARD4       | 134429 | 22.6% | 5.7%  | 13.0% | 13.8% |
| LOC126248    | 126248 | 23.1% | 7.7%  | 10.5% | 13.8% |
| PON1         | 5444   | 10.7% | 17.8% | 12.8% | 13.8% |
| LRP6         | 4040   | 23.6% | 9.3%  | 8.4%  | 13.8% |
| OR2G3        | 81469  | 15.2% | 5.7%  | 20.4% | 13.8% |
| CXCL2        | 2920   | 18.5% | 8.5%  | 14.3% | 13.8% |
| RNF24        | 11237  | 18.3% | 11.6% | 11.5% | 13.8% |
| DDX50        | 79009  | 16.1% | 6.3%  | 18.9% | 13.8% |
| T2BP         | 92610  | 12.3% | 10.5% | 18.6% | 13.8% |
| LOC401898    | 401898 | 9.1%  | 15.4% | 16.9% | 13.8% |
| RPS6KB2      | 6199   | 14.7% | 15.3% | 11.3% | 13.8% |
| AVPR2        | 554    | 12.2% | 18.9% | 10.2% | 13.8% |
| WDR33        | 55339  | 19.1% | 10.0% | 12.2% | 13.8% |
| FLJ22344     | 79772  | 11.8% | 7.4%  | 22.2% | 13.8% |
| CAPG         | 822    | 10.0% | 13.9% | 17.5% | 13.8% |
| C11ORF5      | 741    | 4.9%  | 5.9%  | 30.6% | 13.8% |
| KIAA0663     | 9877   | 8.2%  | 7.2%  | 26.0% | 13.8% |
| CEBPB        | 1051   | 20.0% | 16.8% | 4.6%  | 13.8% |
| DERL3        | 91319  | 16.7% | 9.1%  | 15.7% | 13.8% |
| RPS6KB1      | 6198   | 13.8% | 13.9% | 13.8% | 13.8% |
| SPG7         | 6687   | 9.6%  | 17.6% | 14.2% | 13.8% |
| FLJ10945     | 55267  | 16.2% | 4.2%  | 21.1% | 13.8% |
| AQP3         | 360    | 6.3%  | 7.1%  | 28.0% | 13.8% |
| C6ORF109     | 25844  | 6.1%  | 10.1% | 25.3% | 13.8% |
| C14ORF124    | 56948  | 15.6% | 10.5% | 15.4% | 13.8% |
| COL9A1       | 1297   | 10.7% | 11.5% | 19.3% | 13.8% |
| RP11-56A21.1 | 387680 | 18.0% | 9.9%  | 13.6% | 13.8% |
| HIF3A        | 64344  | 10.0% | 8.8%  | 22.7% | 13.9% |
| OR13D1       | 286365 | 14.8% | 9.7%  | 17.0% | 13.9% |
| KIAA0792     | 9725   | 7.9%  | 9.7%  | 24.0% | 13.9% |
| FLJ32191     | 147923 | 9.2%  | 11.4% | 20.9% | 13.9% |
| SKIV2L2      | 23517  | 8.7%  | 16.2% | 16.7% | 13.9% |
| ZNF45        | 7596   | 20.0% | 9.1%  | 12.5% | 13.9% |
| GPR44        | 11251  | 5.3%  | 16.0% | 20.4% | 13.9% |
| KIAA0789     | 9671   | 22.1% | 4.5%  | 15.0% | 13.9% |
| ADCY5        | 111    | 14.1% | 14.7% | 12.7% | 13.9% |
| SOC51        | 8651   | 13.7% | 11.5% | 16.3% | 13.9% |
| AMT          | 275    | 22.7% | 6.1%  | 12.8% | 13.9% |
| ALOX15B      | 247    | 9.7%  | 11.4% | 20.5% | 13.9% |
| WFIKKNRP     | 124857 | 11.6% | 8.8%  | 21.2% | 13.9% |
| PML          | 5371   | 21.9% | 5.7%  | 14.0% | 13.9% |
| DPYD         | 1806   | 30.9% | 0.8%  | 10.0% | 13.9% |
| MGC34648     | 199870 | 10.2% | 7.9%  | 23.5% | 13.9% |
| DOCK9        | 23348  | 21.8% | 4.5%  | 15.4% | 13.9% |
| SMYD1        | 150572 | 13.7% | 14.2% | 13.8% | 13.9% |
| ADRA1D       | 146    | 15.7% | 14.5% | 11.6% | 13.9% |
| IMMP2L       | 83943  | 19.9% | 9.1%  | 12.7% | 13.9% |
| SIAT4A       | 6482   | 15.0% | 9.8%  | 16.9% | 13.9% |
| FLJ37078     | 222183 | 22.2% | 7.5%  | 12.0% | 13.9% |
| PPP1R11      | 6992   | 22.2% | 5.4%  | 14.2% | 13.9% |
| PRG2         | 5553   | 18.5% | 6.7%  | 16.6% | 13.9% |
| LOC390928    | 390928 | 14.1% | 17.3% | 10.4% | 13.9% |
| PPAN         | 56342  | 16.7% | 9.8%  | 15.3% | 13.9% |
| TLK1         | 9874   | 12.5% | 11.7% | 17.7% | 14.0% |
| FLJ20254     | 54867  | 31.3% | 0.0%  | 10.6% | 14.0% |
| DTYMK        | 1841   | 12.9% | 20.9% | 8.0%  | 14.0% |
| OR8S1        | 341568 | 15.8% | 5.3%  | 20.8% | 14.0% |
| FLJ12604     | 79674  | 12.4% | 6.7%  | 22.7% | 14.0% |
| CRYGS        | 1427   | 8.3%  | 21.6% | 11.9% | 14.0% |

|               |        |       |       |       |       |
|---------------|--------|-------|-------|-------|-------|
| UNC93B1       | 81622  | 11.0% | 9.1%  | 21.8% | 14.0% |
| TAS2R9        | 50835  | 10.2% | 17.1% | 14.7% | 14.0% |
| DNAI1         | 27019  | 12.2% | 16.5% | 13.2% | 14.0% |
| ACY1          | 95     | 20.1% | 12.4% | 9.5%  | 14.0% |
| TACC3         | 10460  | 18.8% | 12.5% | 10.7% | 14.0% |
| UBE2V2        | 7336   | 18.2% | 8.0%  | 15.8% | 14.0% |
| GZMK          | 3003   | 16.8% | 13.9% | 11.2% | 14.0% |
| CD200R        | 131450 | 8.4%  | 8.5%  | 25.2% | 14.0% |
| P38IP         | 55578  | 13.1% | 12.6% | 16.4% | 14.0% |
| VPRBP         | 9730   | 17.5% | 14.0% | 10.6% | 14.0% |
| ADCY2         | 108    | 17.7% | 8.0%  | 16.4% | 14.0% |
| SRRM2         | 23524  | 8.0%  | 9.1%  | 25.0% | 14.0% |
| AD-017        | 55830  | 29.0% | 7.7%  | 5.5%  | 14.0% |
| HNRPC         | 3183   | 13.3% | 12.1% | 16.7% | 14.0% |
| DKFZP434C245  | 25886  | 12.9% | 12.4% | 16.8% | 14.0% |
| PRDM9         | 56979  | 14.5% | 11.0% | 16.5% | 14.0% |
| GGN           | 199720 | 13.7% | 14.4% | 14.0% | 14.0% |
| KLRD1         | 3824   | 22.3% | 10.0% | 9.8%  | 14.1% |
| TRIM69        | 140691 | 11.4% | 15.5% | 15.3% | 14.1% |
| TCF7L1        | 83439  | 17.4% | 1.3%  | 23.5% | 14.1% |
| MGC:13379     | 51259  | 12.9% | 9.7%  | 19.5% | 14.1% |
| COL4A4        | 1286   | 18.4% | 8.7%  | 15.1% | 14.1% |
| EIF2B4        | 8890   | 14.7% | 17.8% | 9.7%  | 14.1% |
| C7            | 730    | 8.0%  | 17.6% | 16.7% | 14.1% |
| DVL1          | 1855   | 7.1%  | 10.9% | 24.2% | 14.1% |
| C20ORF12      | 55184  | 7.0%  | 13.2% | 22.1% | 14.1% |
| RDX           | 5962   | 14.6% | 12.8% | 14.9% | 14.1% |
| ZNF185        | 7739   | 16.7% | 10.2% | 15.4% | 14.1% |
| FLJ20160      | 54842  | 14.3% | 13.4% | 14.6% | 14.1% |
| NGB           | 58157  | 16.0% | 16.5% | 9.8%  | 14.1% |
| HSD17B7       | 51478  | 20.7% | 4.7%  | 16.9% | 14.1% |
| FKSG24        | 84769  | 20.2% | 4.8%  | 17.3% | 14.1% |
| LOH12CR1      | 118426 | 6.7%  | 10.6% | 25.1% | 14.1% |
| ARPC1A        | 10552  | 6.2%  | 15.9% | 20.3% | 14.1% |
| KRTHB2        | 3888   | 8.6%  | 9.7%  | 24.2% | 14.1% |
| P2RX2         | 22953  | 14.3% | 13.3% | 14.9% | 14.1% |
| P518          | 347148 | 24.6% | 9.1%  | 8.7%  | 14.1% |
| GNB5          | 10681  | 20.3% | 12.0% | 10.2% | 14.1% |
| IGBP1         | 3476   | 11.9% | 16.7% | 13.8% | 14.1% |
| HOXA5         | 3202   | 24.6% | 4.3%  | 13.5% | 14.2% |
| RPL34         | 6164   | 19.9% | 9.6%  | 12.9% | 14.2% |
| D2HGDH        | 728294 | 9.3%  | 16.4% | 16.7% | 14.2% |
| ARSF          | 416    | 26.9% | 9.2%  | 6.4%  | 14.2% |
| FOXD4L1       | 200350 | 14.8% | 17.6% | 10.1% | 14.2% |
| SCRG1         | 11341  | 16.8% | 12.8% | 13.0% | 14.2% |
| SCN5A         | 6331   | 19.5% | 5.9%  | 17.1% | 14.2% |
| GPM6A         | 2823   | 21.1% | 7.0%  | 14.4% | 14.2% |
| PCDHA10       | 56139  | 5.9%  | 11.1% | 25.6% | 14.2% |
| RUNX3         | 864    | 9.8%  | 15.6% | 17.1% | 14.2% |
| MPL           | 4352   | 21.5% | 7.8%  | 13.2% | 14.2% |
| POGZ          | 23126  | 14.9% | 14.3% | 13.4% | 14.2% |
| ADAM15        | 8751   | 19.4% | 11.7% | 11.6% | 14.2% |
| EVA1          | 10205  | 7.6%  | 15.9% | 19.1% | 14.2% |
| NUPL1         | 9818   | 7.0%  | 15.2% | 20.4% | 14.2% |
| FLJ36155      | 148979 | 6.5%  | 9.9%  | 26.3% | 14.2% |
| MGC16491      | 115572 | 4.4%  | 8.6%  | 29.6% | 14.2% |
| DKFZP434N1817 | 84077  | 14.5% | 7.7%  | 20.5% | 14.2% |
| TFG           | 10342  | 8.3%  | 20.4% | 13.9% | 14.2% |
| CD19          | 930    | 7.7%  | 16.7% | 18.3% | 14.2% |
| TRIM45        | 80263  | 15.2% | 17.8% | 9.7%  | 14.2% |
| XPC           | 7508   | 18.5% | 14.6% | 9.6%  | 14.2% |
| RASAL1        | 8437   | 17.7% | 11.3% | 13.7% | 14.2% |
| FEN1          | 2237   | 19.3% | 10.7% | 12.7% | 14.2% |
| FREB          | 84824  | 15.7% | 6.9%  | 20.1% | 14.2% |
| LOC51236      | 51236  | 13.0% | 12.3% | 17.5% | 14.2% |
| P8            | 26471  | 12.9% | 6.3%  | 23.5% | 14.2% |
| GCGR          | 2642   | 15.3% | 10.1% | 17.3% | 14.2% |
| GOR           | 254958 | 15.9% | 12.3% | 14.6% | 14.2% |
| GFRA4         | 64096  | 15.1% | 8.5%  | 19.2% | 14.3% |
| RBBP6         | 5930   | 25.0% | 5.7%  | 12.1% | 14.3% |
| KIAA1468      | 57614  | 9.0%  | 14.0% | 19.7% | 14.3% |
| NR2E3         | 10002  | 24.0% | 8.4%  | 10.4% | 14.3% |
| MGC48915      | 338872 | 12.5% | 6.2%  | 24.1% | 14.3% |
| CGI-94        | 51118  | 10.8% | 6.5%  | 25.5% | 14.3% |
| ALG3          | 10195  | 26.3% | 5.4%  | 11.1% | 14.3% |
| LAPTM5        | 7805   | 10.5% | 11.9% | 20.5% | 14.3% |
| PPAP2C        | 8612   | 20.0% | 13.3% | 9.5%  | 14.3% |
| ATP5E         | 514    | 21.2% | 12.8% | 8.8%  | 14.3% |
| SLC2A7        | 155184 | 11.5% | 14.7% | 16.7% | 14.3% |
| TIGD5         | 84948  | 15.3% | 16.3% | 11.4% | 14.3% |
| SCN4A         | 6329   | 17.5% | 6.9%  | 18.6% | 14.3% |
| PPA2          | 27068  | 13.7% | 12.6% | 16.7% | 14.3% |
| GPR109B       | 8843   | 15.4% | 9.7%  | 17.9% | 14.3% |
| EN2           | 2020   | 17.0% | 15.6% | 10.5% | 14.3% |
| LIAS          | 11019  | 11.8% | 16.8% | 14.5% | 14.3% |
| C9ORF12       | 64768  | 17.3% | 9.8%  | 15.9% | 14.3% |
| CHRM2         | 1129   | 12.3% | 13.9% | 16.9% | 14.4% |
| FLJ14834      | 84935  | 14.3% | 6.8%  | 22.0% | 14.4% |
| PGF           | 5228   | 19.7% | 8.7%  | 14.7% | 14.4% |
| LOXL1         | 4016   | 18.5% | 7.2%  | 17.4% | 14.4% |
| KIAA0882      | 23158  | 12.6% | 10.3% | 20.2% | 14.4% |
| MLST01        | 55711  | 22.4% | 14.5% | 6.2%  | 14.4% |
| POLA          | 5422   | 25.9% | 9.9%  | 7.3%  | 14.4% |
| LTBP2         | 4053   | 16.7% | 17.9% | 8.6%  | 14.4% |
| PCDHA9        | 9752   | 20.0% | 6.5%  | 16.7% | 14.4% |
| POR           | 5447   | 12.8% | 15.3% | 15.1% | 14.4% |
| FLJ14009      | 79816  | 8.8%  | 4.5%  | 29.8% | 14.4% |
| IBRDC2        | 255488 | 16.3% | 12.6% | 14.3% | 14.4% |

|            |        |       |       |       |       |
|------------|--------|-------|-------|-------|-------|
| ZNF620     | 253639 | 13.6% | 14.7% | 14.9% | 14.4% |
| LMAN1L     | 79748  | 5.4%  | 17.1% | 20.6% | 14.4% |
| DEFA4      | 1669   | 8.8%  | 13.8% | 20.6% | 14.4% |
| P2RY14     | 9934   | 18.3% | 11.0% | 14.0% | 14.4% |
| OR10AG1    | 282770 | 8.0%  | 14.4% | 20.8% | 14.4% |
| VPS16      | 64601  | 3.8%  | 18.5% | 20.9% | 14.4% |
| PRICKLE2   | 166336 | 28.3% | 4.3%  | 10.6% | 14.4% |
| ST6GALNAC2 | 10610  | 16.3% | 11.2% | 15.8% | 14.4% |
| LASS1      | 10715  | 12.7% | 12.8% | 17.7% | 14.4% |
| CXADR      | 1525   | 14.3% | 6.1%  | 22.9% | 14.4% |
| PPARGC1A   | 10891  | 14.7% | 9.8%  | 18.8% | 14.4% |
| HRASLS3    | 11145  | 14.9% | 9.5%  | 18.9% | 14.4% |
| FPGS       | 2356   | 12.1% | 14.7% | 16.5% | 14.4% |
| CPS1       | 1373   | 24.2% | 7.5%  | 11.5% | 14.4% |
| ZNF354C    | 30832  | 18.3% | 13.5% | 11.5% | 14.4% |
| FLJ14827   | 84934  | 11.7% | 6.2%  | 25.4% | 14.4% |
| TIM14      | 131118 | 6.7%  | 20.0% | 16.7% | 14.4% |
| C14ORF92   | 9878   | 0.0%  | 33.3% | 10.0% | 14.4% |
| DDA3       | 84722  | 11.8% | 8.9%  | 22.7% | 14.4% |
| TOSO       | 9214   | 8.7%  | 7.2%  | 27.4% | 14.4% |
| EIF2C4     | 192670 | 16.9% | 7.4%  | 19.1% | 14.4% |
| ADH7       | 131    | 27.0% | 4.0%  | 12.4% | 14.4% |
| MGC11266   | 79172  | 16.0% | 16.5% | 10.9% | 14.5% |
| KCNJ15     | 3772   | 19.3% | 8.7%  | 15.4% | 14.5% |
| C14ORF108  | 55745  | 13.8% | 12.9% | 16.7% | 14.5% |
| MFAP4      | 4239   | 14.6% | 13.7% | 15.1% | 14.5% |
| RANBP17    | 64901  | 16.8% | 14.8% | 11.8% | 14.5% |
| FEM1A      | 55527  | 16.0% | 9.6%  | 17.9% | 14.5% |
| NAPA       | 8775   | 16.7% | 12.5% | 14.3% | 14.5% |
| MGC26856   | 256710 | 15.1% | 6.6%  | 21.8% | 14.5% |
| MAGEA10    | 4109   | 22.0% | 6.8%  | 14.6% | 14.5% |
| GGTL4      | 91227  | 13.2% | 20.5% | 9.8%  | 14.5% |
| CBLC       | 23624  | 9.8%  | 14.3% | 19.4% | 14.5% |
| NUP153     | 9972   | 15.7% | 13.3% | 14.5% | 14.5% |
| FLJ43692   | 445328 | 13.0% | 14.4% | 16.2% | 14.5% |
| KCNH6      | 81033  | 18.3% | 8.2%  | 17.0% | 14.5% |
| CGA        | 1081   | 10.3% | 12.2% | 21.0% | 14.5% |
| IL5        | 3567   | 15.6% | 14.4% | 13.6% | 14.5% |
| PLCG1      | 5335   | 22.6% | 5.8%  | 15.3% | 14.5% |
| UGT8       | 7368   | 14.7% | 10.0% | 18.9% | 14.5% |
| LOC124842  | 124842 | 12.1% | 13.2% | 18.3% | 14.5% |
| PPP2R5D    | 5528   | 16.6% | 16.5% | 10.5% | 14.5% |
| ALDH1A3    | 220    | 20.0% | 9.5%  | 14.2% | 14.5% |
| LOC92689   | 92689  | 17.5% | 16.3% | 9.9%  | 14.5% |
| HAK        | 115701 | 14.5% | 14.8% | 14.3% | 14.6% |
| CXORF6     | 10046  | 11.9% | 14.9% | 16.9% | 14.6% |
| TRIM62     | 55223  | 17.6% | 6.9%  | 19.2% | 14.6% |
| SUPT3H     | 8464   | 14.2% | 15.5% | 14.0% | 14.6% |
| RHOT1      | 55288  | 0.0%  | 31.3% | 12.5% | 14.6% |
| PPP1R1A    | 5502   | 10.8% | 23.3% | 9.7%  | 14.6% |
| CTDP1      | 9150   | 16.0% | 16.9% | 10.9% | 14.6% |
| TCIRG1     | 10312  | 14.2% | 14.6% | 15.0% | 14.6% |
| CACNA1E    | 777    | 19.6% | 10.4% | 13.8% | 14.6% |
| MRGPRF     | 219928 | 4.9%  | 22.4% | 16.5% | 14.6% |
| DUX4       | 22947  | 20.0% | 7.1%  | 16.7% | 14.6% |
| TBL3       | 10607  | 11.6% | 20.0% | 12.2% | 14.6% |
| MGC33889   | 286514 | 15.8% | 3.6%  | 24.5% | 14.6% |
| POLE2      | 5427   | 29.0% | 5.2%  | 9.6%  | 14.6% |
| BOP1       | 23246  | 17.5% | 17.4% | 9.0%  | 14.6% |
| SV2C       | 22987  | 7.2%  | 12.0% | 24.7% | 14.6% |
| WASPIP     | 7456   | 8.9%  | 1.7%  | 33.3% | 14.6% |
| PIR        | 8544   | 11.7% | 17.4% | 14.9% | 14.6% |
| SLC34A3    | 142680 | 18.5% | 5.8%  | 19.7% | 14.6% |
| ZNF200     | 7752   | 7.1%  | 15.8% | 21.0% | 14.6% |
| PSTPIP2    | 9050   | 9.6%  | 13.6% | 20.8% | 14.7% |
| CCT8       | 10694  | 19.0% | 17.2% | 7.7%  | 14.7% |
| C9ORF83    | 51510  | 14.4% | 10.6% | 19.0% | 14.7% |
| OPN15W     | 611    | 15.2% | 11.6% | 17.2% | 14.7% |
| NCR3       | 259197 | 20.3% | 8.6%  | 15.2% | 14.7% |
| OR2J2      | 26707  | 4.2%  | 23.5% | 16.3% | 14.7% |
| FLJ10547   | 55721  | 9.4%  | 8.3%  | 26.3% | 14.7% |
| TMC2       | 117532 | 17.9% | 11.9% | 14.2% | 14.7% |
| NRXN1      | 9378   | 13.3% | 8.8%  | 21.9% | 14.7% |
| HLA-DMA    | 3108   | 18.3% | 11.5% | 14.3% | 14.7% |
| GRHPR      | 9380   | 14.6% | 11.9% | 17.5% | 14.7% |
| OR5K2      | 402135 | 14.0% | 15.5% | 14.6% | 14.7% |
| FLJ30656   | 124801 | 11.5% | 13.0% | 19.6% | 14.7% |
| FLJ38964   | 161253 | 11.8% | 5.6%  | 26.7% | 14.7% |
| TCAP       | 8557   | 11.1% | 7.5%  | 25.5% | 14.7% |
| FLNA       | 2316   | 23.2% | 8.8%  | 12.1% | 14.7% |
| IL11       | 3589   | 13.5% | 16.7% | 14.0% | 14.7% |
| FLJ25124   | 148741 | 12.5% | 8.9%  | 22.7% | 14.7% |
| NUP133     | 55746  | 18.6% | 5.9%  | 19.6% | 14.7% |
| TRIM54     | 57159  | 17.4% | 10.1% | 16.7% | 14.7% |
| PIPSK1A    | 8394   | 16.8% | 11.4% | 16.0% | 14.7% |
| LOC155054  | 155054 | 9.4%  | 11.3% | 23.5% | 14.7% |
| NMI        | 9111   | 18.2% | 13.5% | 12.5% | 14.7% |
| RCN2       | 5955   | 16.4% | 8.4%  | 19.4% | 14.7% |
| ITLL1      | 25809  | 16.3% | 12.8% | 15.1% | 14.7% |
| HS6ST2     | 90161  | 8.4%  | 18.4% | 17.4% | 14.7% |
| FLJ39369   | 126549 | 22.7% | 5.2%  | 16.4% | 14.7% |
| ANGPTL4    | 51129  | 6.3%  | 12.1% | 25.9% | 14.8% |
| ZNF215     | 7762   | 23.5% | 4.3%  | 16.5% | 14.8% |
| SNAP29     | 9342   | 17.9% | 4.4%  | 22.0% | 14.8% |
| RHOV       | 171177 | 22.5% | 7.0%  | 14.8% | 14.8% |
| C19ORF6    | 91304  | 8.4%  | 17.2% | 18.8% | 14.8% |
| FLJ10134   | 55076  | 11.4% | 5.0%  | 27.9% | 14.8% |
| LOC202459  | 202459 | 12.5% | 9.1%  | 22.8% | 14.8% |

|               |           |       |       |       |       |
|---------------|-----------|-------|-------|-------|-------|
| SF3B4         | 10262     | 24.6% | 8.3%  | 11.4% | 14.8% |
| PEX10         | 5192      | 15.7% | 11.3% | 17.3% | 14.8% |
| AHCYL1        | 10768     | 18.0% | 10.0% | 16.4% | 14.8% |
| ASMT          | 438       | 15.0% | 11.1% | 18.3% | 14.8% |
| TAL1          | 6886      | 29.6% | 4.0%  | 10.8% | 14.8% |
| TIMM23        | 10431     | 21.4% | 9.1%  | 13.9% | 14.8% |
| OXGR1         | 27199     | 7.8%  | 11.8% | 24.8% | 14.8% |
| SPI1          | 6688      | 0.0%  | 11.1% | 33.3% | 14.8% |
| SLCGA15       | 55117     | 28.3% | 4.4%  | 11.8% | 14.8% |
| TSP50         | 29122     | 24.4% | 8.6%  | 11.4% | 14.8% |
| CCNK          | 8812      | 22.7% | 6.9%  | 14.8% | 14.8% |
| MGC2494       | 65990     | 14.7% | 3.7%  | 26.1% | 14.8% |
| CRLF2         | 64109     | 10.5% | 13.7% | 20.2% | 14.8% |
| DOC2A         | 8448      | 10.8% | 17.2% | 16.5% | 14.8% |
| LIME1         | 54923     | 27.5% | 4.6%  | 12.4% | 14.8% |
| SLAMF1        | 6504      | 14.6% | 14.6% | 15.3% | 14.8% |
| KIAA0892      | 23383     | 18.6% | 13.5% | 12.4% | 14.8% |
| VPS35         | 55737     | 18.5% | 8.8%  | 17.2% | 14.8% |
| TAAAR5        | 9038      | 15.4% | 13.0% | 16.1% | 14.8% |
| WDR8          | 49856     | 27.6% | 0.0%  | 16.9% | 14.8% |
| WFDC8         | 90199     | 10.9% | 7.8%  | 25.8% | 14.8% |
| GPR128        | 84873     | 16.3% | 12.5% | 15.7% | 14.8% |
| EEA1          | 8411      | 14.7% | 11.4% | 18.3% | 14.8% |
| DKKL1-PENDING | 27120     | 13.0% | 14.6% | 16.9% | 14.8% |
| ZNF42         | 7593      | 15.8% | 12.0% | 16.6% | 14.8% |
| RGS9          | 8787      | 20.3% | 9.9%  | 14.3% | 14.8% |
| GBP3          | 2635      | 12.3% | 7.9%  | 24.4% | 14.8% |
| MIRGPRX4      | 117196    | 15.3% | 13.5% | 15.8% | 14.8% |
| MGC44505      | 339779    | 17.4% | 3.1%  | 24.1% | 14.8% |
| MDM2          | 4193      | 19.0% | 13.0% | 12.5% | 14.9% |
| DKFZP4341116  | 25962     | 11.3% | 7.9%  | 25.4% | 14.9% |
| COX15         | 1355      | 20.9% | 8.4%  | 15.2% | 14.9% |
| DKFZP7621137  | 136051    | 21.9% | 2.7%  | 20.0% | 14.9% |
| STN2          | 85439     | 13.3% | 12.5% | 18.8% | 14.9% |
| CT47.8        | 728049    | 17.8% | 14.5% | 12.2% | 14.9% |
| ZNF589        | 51385     | 11.9% | 17.5% | 15.2% | 14.9% |
| UBIAD1        | 29914     | 7.7%  | 14.0% | 22.9% | 14.9% |
| CUGBP1        | 10658     | 16.0% | 15.6% | 13.0% | 14.9% |
| C6ORF195      | 154386    | 19.1% | 9.5%  | 16.0% | 14.9% |
| LOC339456     | 339456    | 21.3% | 11.6% | 11.7% | 14.9% |
| AGPAT1        | 10554     | 12.0% | 3.3%  | 29.4% | 14.9% |
| PARG1         | 9411      | 9.2%  | 3.0%  | 32.5% | 14.9% |
| SURF4         | 6836      | 13.1% | 16.8% | 14.7% | 14.9% |
| ZNF254        | 9534      | 17.6% | 9.5%  | 17.6% | 14.9% |
| RCN3          | 57333     | 19.1% | 13.1% | 12.5% | 14.9% |
| PIPSKL1       | 138429    | 18.3% | 13.4% | 13.0% | 14.9% |
| INA           | 9118      | 25.2% | 9.0%  | 10.4% | 14.9% |
| DKFZP434G0625 | 91584     | 13.0% | 9.4%  | 22.2% | 14.9% |
| C2            | 717       | 21.7% | 11.2% | 11.7% | 14.9% |
| DAP3          | 7818      | 22.3% | 9.1%  | 13.3% | 14.9% |
| KIAA1449      | 57599     | 5.6%  | 14.0% | 25.0% | 14.9% |
| ATP6V1C2      | 245973    | 11.5% | 17.2% | 16.0% | 14.9% |
| OR1D2         | 4991      | 9.0%  | 21.3% | 14.4% | 14.9% |
| C14ORF148     | 122945    | 17.1% | 4.3%  | 23.2% | 14.9% |
| FLJ31300      | 131669    | 15.3% | 14.8% | 14.6% | 14.9% |
| SFTPD         | 6441      | 12.7% | 22.4% | 9.6%  | 14.9% |
| VAX2          | 25806     | 13.8% | 16.0% | 14.9% | 14.9% |
| PHLDA3        | 23612     | 21.7% | 11.4% | 11.6% | 14.9% |
| ZNF507        | 22847     | 16.1% | 13.5% | 15.1% | 14.9% |
| LOC339448     | 339448    | 17.2% | 8.4%  | 19.1% | 14.9% |
| TDRD5         | 163589    | 10.2% | 13.3% | 21.3% | 14.9% |
| TAPBP         | 6892      | 17.2% | 11.3% | 16.3% | 14.9% |
| MMP20         | 9313      | 19.7% | 13.7% | 11.3% | 14.9% |
| CYP26A1       | 1592      | 20.1% | 9.6%  | 15.0% | 14.9% |
| NOC4          | 10328     | 17.3% | 9.5%  | 17.9% | 14.9% |
| SLC7A1        | 6541      | 16.7% | 9.5%  | 18.6% | 14.9% |
| LOC139886     | 139886    | 16.1% | 11.3% | 17.3% | 14.9% |
| ADAM20        | 8748      | 15.5% | 13.4% | 15.9% | 14.9% |
| FCGR1C        | 100132417 | 22.0% | 11.1% | 11.7% | 14.9% |
| GATA2         | 2624      | 15.7% | 9.1%  | 20.0% | 14.9% |
| FANCD2        | 2177      | 8.3%  | 19.7% | 16.8% | 14.9% |
| CDC37         | 11140     | 17.6% | 7.3%  | 19.9% | 14.9% |
| MIP           | 4284      | 10.8% | 16.3% | 17.8% | 14.9% |
| TPH2          | 121278    | 14.7% | 13.8% | 16.3% | 14.9% |
| MGC34837      | 127795    | 11.3% | 8.5%  | 25.0% | 14.9% |
| ORMDL3        | 94103     | 18.8% | 0.0%  | 26.1% | 14.9% |
| SPA17         | 53340     | 11.9% | 17.1% | 15.8% | 14.9% |
| DCXR          | 51181     | 27.7% | 5.5%  | 11.7% | 15.0% |
| IL1RL1        | 9173      | 18.5% | 8.8%  | 17.5% | 15.0% |
| OR2G6         | 391211    | 13.2% | 16.0% | 15.7% | 15.0% |
| PSMB10        | 5699      | 12.9% | 17.4% | 14.6% | 15.0% |
| SYPL2         | 284612    | 13.8% | 18.3% | 12.8% | 15.0% |
| FKBP14        | 55033     | 15.2% | 9.2%  | 20.5% | 15.0% |
| PR1           | 140738    | 14.7% | 13.1% | 17.0% | 15.0% |
| PAGE-5        | 90737     | 17.4% | 9.3%  | 18.2% | 15.0% |
| FH            | 2271      | 24.7% | 5.8%  | 14.4% | 15.0% |
| HSXIAPAF1     | 54739     | 9.4%  | 10.9% | 24.5% | 15.0% |
| HDAC9         | 9734      | 20.6% | 10.4% | 13.9% | 15.0% |
| SPG21         | 51324     | 19.0% | 11.2% | 14.8% | 15.0% |
| LILRA3        | 11026     | 22.0% | 17.5% | 5.4%  | 15.0% |
| NY-SAR-41     | 343099    | 13.1% | 12.6% | 19.2% | 15.0% |
| MYST4         | 23522     | 22.6% | 12.9% | 9.4%  | 15.0% |
| RANBP1        | 5902      | 17.1% | 15.0% | 12.9% | 15.0% |
| CENPB         | 1059      | 22.0% | 6.6%  | 16.4% | 15.0% |
| RPS4X         | 6191      | 12.5% | 14.3% | 18.2% | 15.0% |
| DDI2          | 84301     | 29.6% | 10.1% | 5.2%  | 15.0% |
| OR10A5        | 144124    | 20.2% | 8.1%  | 16.7% | 15.0% |
| MGC3123       | 79089     | 10.8% | 14.2% | 19.9% | 15.0% |

|           |        |       |       |       |       |
|-----------|--------|-------|-------|-------|-------|
| SDS       | 10993  | 23.0% | 11.7% | 10.3% | 15.0% |
| SFRS8     | 6433   | 15.6% | 12.9% | 16.6% | 15.0% |
| GLYCTK    | 132158 | 16.7% | 19.1% | 9.2%  | 15.0% |
| ULK2      | 9706   | 12.2% | 15.4% | 17.4% | 15.0% |
| LOC401250 | 401250 | 16.2% | 8.6%  | 20.3% | 15.0% |
| OAT       | 4942   | 20.6% | 7.5%  | 16.9% | 15.0% |
| TTC7B     | 145567 | 11.3% | 14.5% | 19.2% | 15.0% |
| PCDHA3    | 56145  | 22.4% | 11.6% | 11.1% | 15.0% |
| FBXW10    | 10517  | 15.2% | 14.5% | 15.4% | 15.0% |
| PSG4      | 5672   | 17.3% | 10.4% | 17.4% | 15.0% |
| CHGB      | 1114   | 11.0% | 18.1% | 16.0% | 15.0% |
| PDCD2     | 5134   | 12.6% | 20.4% | 12.2% | 15.0% |
| LOC51315  | 51315  | 14.9% | 14.0% | 16.3% | 15.0% |
| LGALS13   | 29124  | 13.7% | 16.8% | 14.7% | 15.0% |
| HDHD4     | 140838 | 9.4%  | 22.4% | 13.3% | 15.0% |
| COAS2     | 164022 | 11.9% | 4.5%  | 28.8% | 15.0% |
| FLJ22875  | 84191  | 4.6%  | 8.3%  | 32.3% | 15.1% |
| SURF5     | 6837   | 16.7% | 10.3% | 18.2% | 15.1% |
| ODD       | 130497 | 19.7% | 6.2%  | 19.3% | 15.1% |
| DUSTYPK   | 25778  | 8.5%  | 22.9% | 13.8% | 15.1% |
| PTK2      | 5747   | 17.9% | 6.3%  | 20.9% | 15.1% |
| HTR1F     | 3355   | 16.0% | 12.3% | 16.9% | 15.1% |
| SPTAN1    | 6709   | 22.6% | 10.0% | 12.6% | 15.1% |
| DCAMKL1   | 9201   | 15.0% | 16.1% | 14.1% | 15.1% |
| MATK      | 4145   | 13.8% | 14.3% | 17.1% | 15.1% |
| GPHN      | 10243  | 22.4% | 10.1% | 12.7% | 15.1% |
| SP1       | 6667   | 11.1% | 9.1%  | 25.0% | 15.1% |
| FLJ10997  | 55279  | 9.1%  | 5.3%  | 30.8% | 15.1% |
| UBE4B     | 10277  | 15.5% | 11.9% | 17.8% | 15.1% |
| ATF2      | 1386   | 23.4% | 7.8%  | 14.0% | 15.1% |
| UCK1      | 83549  | 0.0%  | 22.2% | 23.0% | 15.1% |
| ANKRD2    | 26287  | 17.0% | 12.7% | 15.5% | 15.1% |
| CNGA3     | 1261   | 16.0% | 8.7%  | 20.5% | 15.1% |
| CNNE2     | 9134   | 28.6% | 0.0%  | 16.7% | 15.1% |
| MRPL30    | 51263  | 15.6% | 6.6%  | 23.1% | 15.1% |
| FZD6      | 8323   | 13.0% | 18.8% | 13.4% | 15.1% |
| C20ORF18  | 10616  | 22.2% | 9.8%  | 13.3% | 15.1% |
| DDX23     | 9416   | 24.4% | 8.0%  | 12.9% | 15.1% |
| CLTB      | 1212   | 23.1% | 22.2% | 0.0%  | 15.1% |
| CRYBA4    | 1413   | 12.7% | 11.3% | 21.3% | 15.1% |
| UCHL3     | 7347   | 12.9% | 15.4% | 17.1% | 15.1% |
| OVTN      | 341277 | 12.9% | 10.8% | 21.6% | 15.1% |
| LOC65122  | 65122  | 12.7% | 7.0%  | 25.7% | 15.1% |
| INMT      | 11185  | 17.5% | 11.6% | 16.3% | 15.1% |
| BHLHB2    | 8553   | 26.6% | 7.5%  | 11.2% | 15.1% |
| FLJ32831  | 145858 | 15.0% | 10.7% | 19.7% | 15.1% |
| CCNB1     | 891    | 14.3% | 0.0%  | 31.1% | 15.1% |
| MGC21644  | 153768 | 10.1% | 7.5%  | 27.7% | 15.1% |
| HLC5      | 3141   | 16.3% | 9.4%  | 19.7% | 15.1% |
| ORMDL2    | 29095  | 29.2% | 8.6%  | 7.5%  | 15.1% |
| PIGM      | 93183  | 15.3% | 14.1% | 16.0% | 15.1% |
| IL6       | 3569   | 21.3% | 10.4% | 13.7% | 15.1% |
| ATP8B4    | 79895  | 16.7% | 14.2% | 14.4% | 15.1% |
| CYP2C9    | 1559   | 6.6%  | 24.7% | 14.1% | 15.1% |
| LOC114659 | 114659 | 18.7% | 0.0%  | 26.7% | 15.1% |
| ADH1A     | 124    | 19.1% | 16.1% | 10.2% | 15.1% |
| CKLF5F3   | 123920 | 21.8% | 12.5% | 11.1% | 15.1% |
| PTCRA     | 171558 | 23.6% | 9.6%  | 12.2% | 15.1% |
| IL10RA    | 3587   | 25.4% | 13.4% | 6.6%  | 15.1% |
| FLJ12438  | 60672  | 9.7%  | 16.2% | 19.5% | 15.2% |
| FLJ11017  | 55286  | 6.7%  | 13.5% | 25.3% | 15.2% |
| CPNE5     | 57699  | 17.4% | 13.1% | 15.0% | 15.2% |
| PCSK2     | 5126   | 22.7% | 10.5% | 12.2% | 15.2% |
| KCNK9     | 51305  | 19.4% | 9.7%  | 16.4% | 15.2% |
| LOC339324 | 339324 | 19.4% | 6.7%  | 19.4% | 15.2% |
| MGC43690  | 253769 | 12.0% | 5.0%  | 28.6% | 15.2% |
| GSTO1     | 9446   | 15.8% | 15.7% | 14.0% | 15.2% |
| CLDN6     | 9074   | 17.9% | 8.0%  | 19.6% | 15.2% |
| FNDCS     | 252995 | 15.7% | 10.0% | 19.8% | 15.2% |
| GAB2      | 9846   | 12.2% | 13.1% | 20.2% | 15.2% |
| ADARB1    | 104    | 21.9% | 11.3% | 12.3% | 15.2% |
| ETF1      | 2107   | 43.1% | 2.5%  | 0.0%  | 15.2% |
| ZNF34     | 80778  | 13.7% | 17.8% | 14.1% | 15.2% |
| OXTR      | 5021   | 9.8%  | 19.3% | 16.5% | 15.2% |
| TARP      | 445347 | 19.3% | 9.3%  | 17.0% | 15.2% |
| PIK3CA    | 5290   | 23.9% | 0.0%  | 21.7% | 15.2% |
| LOC441161 | 441161 | 0.0%  | 7.1%  | 38.5% | 15.2% |
| MGC26999  | 169966 | 13.4% | 6.4%  | 25.9% | 15.2% |
| ELOVL7    | 79993  | 24.8% | 9.2%  | 11.6% | 15.2% |
| FLJ14050  | 79927  | 12.0% | 6.0%  | 27.7% | 15.2% |
| SLC6A17   | 388662 | 21.1% | 13.0% | 11.6% | 15.2% |
| C20ORF71  | 128861 | 21.2% | 8.6%  | 15.9% | 15.2% |
| OR7G2     | 390882 | 11.0% | 20.5% | 14.2% | 15.2% |
| FLJ46536  | 285180 | 8.9%  | 16.5% | 20.3% | 15.2% |
| ARSD      | 414    | 19.1% | 12.9% | 13.6% | 15.2% |
| PCDHB12   | 56124  | 3.3%  | 25.6% | 16.7% | 15.2% |
| PHLDA2    | 7262   | 22.2% | 10.7% | 12.7% | 15.2% |
| LOC91942  | 91942  | 9.4%  | 9.6%  | 26.7% | 15.2% |
| TMPPRS59  | 360200 | 32.5% | 4.3%  | 8.8%  | 15.2% |
| CREBL1    | 1388   | 9.1%  | 22.4% | 14.2% | 15.2% |
| HOXD4     | 3233   | 17.8% | 8.6%  | 19.2% | 15.2% |
| SYTL4     | 94121  | 18.3% | 4.6%  | 22.8% | 15.2% |
| IFITM2    | 10581  | 8.5%  | 12.2% | 24.9% | 15.2% |
| KCTD4     | 386618 | 17.0% | 8.2%  | 20.5% | 15.2% |
| SERPINF2  | 5345   | 9.1%  | 15.1% | 21.5% | 15.2% |
| PB1       | 55193  | 11.0% | 7.7%  | 26.9% | 15.2% |
| NGL-1     | 57689  | 13.3% | 8.6%  | 23.8% | 15.2% |
| HPD       | 3242   | 17.5% | 14.4% | 13.8% | 15.2% |



|               |        |       |       |       |       |
|---------------|--------|-------|-------|-------|-------|
| ATP2B2        | 491    | 34.6% | 5.1%  | 6.0%  | 15.2% |
| NFKB2         | 4791   | 11.5% | 18.9% | 15.4% | 15.3% |
| DKFZP762C1112 | 169200 | 16.8% | 4.7%  | 24.3% | 15.3% |
| IL8           | 3576   | 20.7% | 7.4%  | 17.6% | 15.3% |
| MGC11242      | 79170  | 18.9% | 11.3% | 15.5% | 15.3% |
| FLJ32844      | 199221 | 11.8% | 2.3%  | 31.7% | 15.3% |
| CNTN2         | 6900   | 19.6% | 10.6% | 15.6% | 15.3% |
| CDC25C        | 995    | 12.9% | 19.8% | 13.1% | 15.3% |
| KNG1          | 3827   | 15.2% | 10.0% | 20.6% | 15.3% |
| C6ORF111      | 25957  | 23.9% | 9.6%  | 12.3% | 15.3% |
| KIAA2018      | 205717 | 8.6%  | 14.9% | 22.3% | 15.3% |
| KIAA0795      | 23276  | 17.0% | 15.4% | 13.4% | 15.3% |
| ZNF408        | 79797  | 25.0% | 5.6%  | 15.3% | 15.3% |
| RPS11         | 6205   | 0.0%  | 9.5%  | 36.4% | 15.3% |
| NCLN          | 56926  | 17.1% | 6.6%  | 22.2% | 15.3% |
| LHX9          | 56956  | 6.8%  | 14.1% | 25.1% | 15.3% |
| FLJ20514      | 54960  | 7.4%  | 10.1% | 28.4% | 15.3% |
| LOC389792     | 389792 | 14.7% | 10.8% | 20.4% | 15.3% |
| LOC128710     | 128710 | 17.2% | 5.4%  | 23.4% | 15.3% |
| ARHGAP24      | 83478  | 17.1% | 14.6% | 14.3% | 15.3% |
| HPSE          | 10855  | 15.7% | 13.3% | 16.9% | 15.3% |
| ZNF597        | 146434 | 21.1% | 7.1%  | 17.8% | 15.3% |
| KCTD10        | 83892  | 12.8% | 8.7%  | 24.5% | 15.3% |
| FLJ21628      | 80108  | 18.0% | 13.3% | 14.7% | 15.3% |
| DUB3          | 377630 | 26.7% | 5.2%  | 14.1% | 15.3% |
| FLJ13639      | 79758  | 13.3% | 12.3% | 20.4% | 15.4% |
| ARFGAP3       | 26286  | 31.8% | 4.6%  | 9.7%  | 15.4% |
| FAH           | 2184   | 36.0% | 2.7%  | 7.4%  | 15.4% |
| MGC33338      | 126823 | 20.4% | 11.9% | 13.8% | 15.4% |
| FLJ21127      | 79600  | 13.7% | 11.7% | 20.7% | 15.4% |
| LOC652433     | 652433 | 21.7% | 10.0% | 14.4% | 15.4% |
| PSD           | 5662   | 20.1% | 12.9% | 13.1% | 15.4% |
| HSPC159       | 29094  | 19.8% | 7.3%  | 19.0% | 15.4% |
| IMAGE:4907098 | 192134 | 21.7% | 11.8% | 12.7% | 15.4% |
| SLC9A3        | 6550   | 19.5% | 13.7% | 12.9% | 15.4% |
| PHB           | 5245   | 27.1% | 5.3%  | 13.8% | 15.4% |
| NAP1L3        | 4675   | 23.1% | 0.0%  | 23.1% | 15.4% |
| CSN2          | 1447   | 16.4% | 18.4% | 11.4% | 15.4% |
| GRM4          | 2914   | 17.4% | 15.2% | 13.5% | 15.4% |
| MCSP          | 4184   | 18.2% | 11.3% | 16.7% | 15.4% |
| MGC40178      | 122046 | 14.2% | 11.6% | 20.3% | 15.4% |
| PCBD          | 5092   | 21.7% | 13.2% | 11.3% | 15.4% |
| HSPC016       | 51372  | 8.9%  | 16.1% | 21.2% | 15.4% |
| MOG           | 4340   | 15.0% | 17.5% | 13.7% | 15.4% |
| CIB1          | 10519  | 15.6% | 15.8% | 14.7% | 15.4% |
| PDZK7         | 79955  | 10.3% | 13.5% | 22.3% | 15.4% |
| PIGR          | 5284   | 16.6% | 9.3%  | 20.3% | 15.4% |
| ADMIR         | 11318  | 17.3% | 15.5% | 13.5% | 15.4% |
| UBE2D3        | 7323   | 19.7% | 16.7% | 9.8%  | 15.4% |
| EPX           | 8288   | 16.3% | 11.1% | 18.9% | 15.4% |
| SCOTIN        | 51246  | 5.8%  | 23.4% | 17.1% | 15.4% |
| TES           | 26136  | 13.6% | 14.0% | 18.6% | 15.4% |
| PYGO2         | 90780  | 18.8% | 10.8% | 16.7% | 15.4% |
| CYP26B1       | 56603  | 14.1% | 11.7% | 20.4% | 15.4% |
| PAIP2         | 51247  | 15.4% | 18.2% | 12.7% | 15.4% |
| CCL7          | 6354   | 15.9% | 14.8% | 15.5% | 15.4% |
| LALBA         | 3906   | 16.8% | 13.0% | 16.5% | 15.4% |
| FLJ10781      | 55228  | 15.2% | 11.8% | 19.2% | 15.4% |
| CLECSF1       | 10143  | 24.8% | 4.9%  | 16.6% | 15.4% |
| SRP54         | 6729   | 23.8% | 12.5% | 10.0% | 15.4% |
| VKORC1        | 79001  | 13.0% | 15.6% | 17.8% | 15.4% |
| GSPT1         | 2935   | 20.2% | 12.4% | 13.8% | 15.4% |
| FLJ14639      | 84901  | 9.9%  | 7.9%  | 28.5% | 15.4% |
| USH3A         | 7401   | 16.8% | 7.5%  | 22.0% | 15.4% |
| NIPA          | 51530  | 13.2% | 6.9%  | 26.2% | 15.4% |
| CDC45L        | 8318   | 12.0% | 14.9% | 19.5% | 15.4% |
| MAG           | 4099   | 21.6% | 10.6% | 14.2% | 15.5% |
| FLJ35093      | 374986 | 10.1% | 19.0% | 17.2% | 15.5% |
| KHDRBS1       | 10657  | 27.9% | 7.0%  | 11.5% | 15.5% |
| INTERSEX      | 55588  | 9.5%  | 17.1% | 19.8% | 15.5% |
| GTTF2E1       | 2960   | 20.2% | 9.4%  | 16.8% | 15.5% |
| CACNG3        | 10368  | 15.5% | 13.7% | 17.2% | 15.5% |
| NLGN3         | 54413  | 16.9% | 13.3% | 16.2% | 15.5% |
| MGC35366      | 144193 | 7.6%  | 9.8%  | 29.1% | 15.5% |
| SART3         | 9733   | 12.0% | 17.4% | 17.1% | 15.5% |
| SUV420H2      | 84787  | 21.5% | 9.5%  | 15.4% | 15.5% |
| PDE6A         | 5145   | 14.2% | 16.5% | 15.7% | 15.5% |
| HRASLS2       | 54979  | 18.3% | 9.3%  | 18.8% | 15.5% |
| TU12B1-TY     | 51559  | 13.8% | 10.6% | 22.0% | 15.5% |
| AGPAT2        | 10555  | 20.6% | 14.9% | 10.9% | 15.5% |
| C9ORF88       | 64855  | 15.3% | 9.6%  | 21.6% | 15.5% |
| OR10V1        | 390201 | 18.3% | 13.8% | 14.4% | 15.5% |
| DCX           | 1641   | 14.6% | 16.8% | 15.0% | 15.5% |
| PIK4CA        | 5297   | 17.0% | 16.8% | 12.6% | 15.5% |
| SATB1         | 6304   | 17.5% | 13.2% | 15.7% | 15.5% |
| SCDR9         | 345275 | 26.0% | 5.6%  | 14.8% | 15.5% |
| PLOD2         | 5352   | 27.4% | 9.7%  | 9.4%  | 15.5% |
| PROP1         | 5626   | 12.7% | 23.0% | 10.8% | 15.5% |
| NME2          | 4831   | 17.0% | 16.3% | 13.2% | 15.5% |
| KIF25         | 3834   | 21.6% | 6.6%  | 18.3% | 15.5% |
| SKP1A         | 6500   | 20.0% | 11.3% | 15.2% | 15.5% |
| FAM110C       | 642273 | 21.4% | 16.1% | 9.0%  | 15.5% |
| DEFB116       | 245930 | 13.2% | 14.1% | 19.3% | 15.5% |
| ZNF223        | 7766   | 20.2% | 11.3% | 15.0% | 15.5% |
| BTC           | 685    | 11.5% | 15.9% | 19.2% | 15.5% |
| TPM4          | 7171   | 30.5% | 11.7% | 4.4%  | 15.5% |
| IHPK3         | 117283 | 9.5%  | 11.9% | 25.3% | 15.6% |
| CEL           | 1056   | 20.4% | 9.8%  | 16.5% | 15.6% |

|           |        |       |       |       |       |
|-----------|--------|-------|-------|-------|-------|
| NRIP1     | 8204   | 25.9% | 6.6%  | 14.2% | 15.6% |
| KIAA1553  | 57673  | 10.3% | 14.0% | 22.4% | 15.6% |
| HSF1      | 3297   | 22.2% | 8.2%  | 16.3% | 15.6% |
| SOX10     | 6663   | 17.2% | 13.7% | 15.9% | 15.6% |
| HOXA10    | 3206   | 22.6% | 14.9% | 9.2%  | 15.6% |
| C20ORF9   | 51098  | 11.9% | 8.1%  | 26.7% | 15.6% |
| WNT9B     | 7484   | 18.6% | 17.0% | 11.1% | 15.6% |
| MAGE4     | 81557  | 10.4% | 14.8% | 21.6% | 15.6% |
| SUPT5H    | 6829   | 14.3% | 18.2% | 14.3% | 15.6% |
| KRTHA1    | 3881   | 19.6% | 10.5% | 16.7% | 15.6% |
| FGFR1     | 2260   | 16.7% | 16.3% | 13.8% | 15.6% |
| CLDN14    | 23562  | 19.0% | 15.2% | 12.5% | 15.6% |
| C14ORF120 | 25983  | 18.3% | 18.0% | 10.5% | 15.6% |
| MDH1      | 4190   | 22.9% | 10.8% | 13.0% | 15.6% |
| C6orf173  | 387103 | 9.2%  | 20.7% | 16.9% | 15.6% |
| PREB      | 10113  | 15.4% | 17.9% | 13.5% | 15.6% |
| GPI       | 2821   | 21.3% | 11.6% | 13.9% | 15.6% |
| NME1-NME2 | 654364 | 15.4% | 15.3% | 16.2% | 15.6% |
| TIMM50    | 92609  | 10.7% | 16.9% | 19.2% | 15.6% |
| SLC37A1   | 54020  | 14.3% | 11.1% | 21.5% | 15.6% |
| EDG4      | 9170   | 11.6% | 20.8% | 14.5% | 15.6% |
| EGFL4     | 1954   | 16.7% | 11.6% | 18.5% | 15.6% |
| LLGL2     | 3993   | 17.6% | 15.3% | 13.9% | 15.6% |
| ALG5      | 29880  | 11.8% | 14.6% | 20.4% | 15.6% |
| ENPP4     | 22875  | 18.5% | 10.5% | 17.9% | 15.6% |
| RNF165    | 494470 | 15.0% | 17.1% | 14.8% | 15.6% |
| PHOX2A    | 401    | 19.5% | 9.4%  | 18.0% | 15.6% |
| HIST3H3   | 8290   | 26.0% | 6.9%  | 14.0% | 15.6% |
| TRIM39    | 56658  | 20.1% | 8.8%  | 18.0% | 15.6% |
| SFRS1     | 6426   | 29.2% | 8.5%  | 9.2%  | 15.6% |
| OR13F1    | 138805 | 1.9%  | 13.1% | 31.9% | 15.6% |
| DRD3      | 1814   | 18.6% | 14.1% | 14.3% | 15.6% |
| DNAJC6    | 9829   | 4.4%  | 18.1% | 24.4% | 15.6% |
| GRIK1     | 2897   | 22.5% | 3.8%  | 20.6% | 15.6% |
| GEMIN5    | 25929  | 25.1% | 12.7% | 9.2%  | 15.6% |
| FLJ13912  | 64785  | 10.3% | 6.9%  | 29.8% | 15.7% |
| POP1      | 10940  | 17.1% | 13.5% | 16.3% | 15.7% |
| JAM2      | 58494  | 9.7%  | 16.0% | 21.2% | 15.7% |
| C7orf6    | 219285 | 17.4% | 13.5% | 16.1% | 15.7% |
| KIAA1163  | 57463  | 15.9% | 2.9%  | 28.2% | 15.7% |
| CRK       | 1398   | 17.1% | 18.8% | 11.2% | 15.7% |
| MGC5242   | 78996  | 17.4% | 16.0% | 13.5% | 15.7% |
| LRRN6A    | 84894  | 14.3% | 7.5%  | 25.2% | 15.7% |
| C6ORF75   | 60487  | 17.1% | 6.2%  | 23.8% | 15.7% |
| ITGB1BP1  | 9270   | 19.6% | 8.6%  | 18.7% | 15.7% |
| TPM2      | 7169   | 15.5% | 10.5% | 21.0% | 15.7% |
| SET8      | 387893 | 21.3% | 2.7%  | 23.0% | 15.7% |
| RPP14     | 11102  | 24.4% | 15.2% | 7.5%  | 15.7% |
| DEGS2     | 123099 | 25.3% | 10.0% | 11.8% | 15.7% |
| KIAA0913  | 23053  | 25.6% | 7.1%  | 14.3% | 15.7% |
| TBX10     | 347853 | 24.7% | 9.7%  | 12.7% | 15.7% |
| B4GALT5   | 9334   | 24.7% | 9.0%  | 13.4% | 15.7% |
| SCO1      | 6341   | 22.7% | 14.3% | 10.1% | 15.7% |
| FKBP10    | 60681  | 11.1% | 18.5% | 17.5% | 15.7% |
| OSTBETA   | 123264 | 19.2% | 20.0% | 7.9%  | 15.7% |
| LOC114990 | 114990 | 16.6% | 5.4%  | 25.2% | 15.7% |
| VIM       | 7431   | 19.6% | 12.3% | 15.3% | 15.7% |
| SNARK     | 81788  | 12.8% | 16.3% | 18.1% | 15.7% |
| IRF7      | 3665   | 16.9% | 13.6% | 16.7% | 15.7% |
| FOXC1     | 2296   | 23.9% | 3.7%  | 19.6% | 15.7% |
| GPR37L1   | 9283   | 9.1%  | 17.6% | 20.5% | 15.7% |
| RPS4Y1    | 6192   | 8.2%  | 13.5% | 25.6% | 15.7% |
| MGC5178   | 79008  | 16.7% | 7.9%  | 22.7% | 15.7% |
| RARG      | 5916   | 15.8% | 9.6%  | 21.8% | 15.7% |
| CSTB      | 1476   | 14.5% | 12.7% | 20.0% | 15.7% |
| SOCS2     | 8835   | 7.9%  | 21.4% | 17.9% | 15.7% |
| SLC25A6   | 293    | 11.8% | 14.3% | 21.1% | 15.7% |
| KIAA1706  | 80820  | 29.0% | 5.4%  | 12.9% | 15.7% |
| FLJ31528  | 146705 | 9.0%  | 11.4% | 26.8% | 15.7% |
| HIMAP4    | 55303  | 17.8% | 4.0%  | 25.5% | 15.8% |
| FLJ13955  | 79815  | 10.1% | 5.8%  | 31.4% | 15.8% |
| C2ORF16   | 84226  | 0.0%  | 10.4% | 36.8% | 15.8% |
| TUBB4     | 10381  | 17.4% | 7.1%  | 22.7% | 15.8% |
| FLJ46675  | 146754 | 15.7% | 9.6%  | 22.0% | 15.8% |
| SCGB1D1   | 10648  | 12.1% | 23.8% | 11.3% | 15.8% |
| SNAG1     | 112574 | 0.0%  | 27.3% | 20.0% | 15.8% |
| NAGLU     | 4669   | 11.7% | 12.6% | 22.9% | 15.8% |
| MGC40179  | 115795 | 16.4% | 15.2% | 15.7% | 15.8% |
| HE9       | 127670 | 13.9% | 5.9%  | 27.5% | 15.8% |
| NPYSR     | 4889   | 19.0% | 11.5% | 16.8% | 15.8% |
| PRB2      | 653247 | 21.9% | 9.9%  | 15.5% | 15.8% |
| NKD1      | 85407  | 15.1% | 15.7% | 16.5% | 15.8% |
| LOC130951 | 130951 | 11.1% | 11.4% | 24.9% | 15.8% |
| 24432     | 65057  | 16.5% | 12.5% | 18.4% | 15.8% |
| FBXW5     | 54461  | 14.9% | 12.4% | 20.1% | 15.8% |
| TAA6      | 319100 | 17.8% | 17.3% | 12.2% | 15.8% |
| RCOR3     | 55758  | 20.5% | 10.2% | 16.7% | 15.8% |
| ST8SIA1   | 6489   | 9.1%  | 10.0% | 28.3% | 15.8% |
| FLJ20581  | 54988  | 10.4% | 12.0% | 25.0% | 15.8% |
| ALS2CR19  | 117583 | 15.7% | 8.6%  | 23.1% | 15.8% |
| LPL       | 4023   | 13.5% | 12.6% | 21.3% | 15.8% |
| TMEM57    | 55219  | 30.8% | 16.7% | 0.0%  | 15.8% |
| PPT2      | 9374   | 16.3% | 13.5% | 17.6% | 15.8% |
| SPRR2E    | 6704   | 16.0% | 13.6% | 17.9% | 15.8% |
| KRTHA2    | 3882   | 11.0% | 11.7% | 24.8% | 15.8% |
| FAM12B    | 64184  | 19.7% | 13.9% | 13.9% | 15.8% |
| CHRNA7    | 1139   | 21.1% | 11.0% | 15.3% | 15.8% |
| SPINT1    | 6692   | 22.4% | 9.9%  | 15.1% | 15.8% |

|               |        |       |       |       |       |
|---------------|--------|-------|-------|-------|-------|
| GJB3          | 2707   | 13.3% | 20.5% | 13.7% | 15.8% |
| SULT1A4       | 445329 | 24.9% | 8.1%  | 14.5% | 15.8% |
| RNASE13       | 440163 | 14.4% | 16.0% | 17.1% | 15.8% |
| FLJ21106      | 80167  | 14.1% | 11.6% | 21.7% | 15.8% |
| HRH2          | 3274   | 15.0% | 12.5% | 20.0% | 15.8% |
| ST3GAL3       | 6487   | 10.1% | 16.7% | 20.7% | 15.8% |
| TIMM13        | 26517  | 4.8%  | 23.5% | 19.2% | 15.8% |
| SFRP1         | 6422   | 19.9% | 8.9%  | 18.7% | 15.8% |
| CST8          | 10047  | 17.4% | 21.1% | 9.1%  | 15.8% |
| KCNK7         | 10089  | 18.2% | 6.8%  | 22.5% | 15.8% |
| MYH1          | 4619   | 22.3% | 11.0% | 14.3% | 15.9% |
| MSL3L1        | 10943  | 22.7% | 9.1%  | 15.7% | 15.9% |
| FLJ32855      | 80125  | 8.4%  | 16.3% | 22.8% | 15.9% |
| MMP27         | 64066  | 25.0% | 12.0% | 10.6% | 15.9% |
| PIWIL3        | 440822 | 22.0% | 16.7% | 8.9%  | 15.9% |
| CALML5        | 51806  | 21.4% | 11.2% | 15.0% | 15.9% |
| SSR1          | 6745   | 7.4%  | 23.3% | 16.9% | 15.9% |
| LRR17         | 10234  | 13.7% | 11.5% | 22.4% | 15.9% |
| GPRC5B        | 51704  | 12.9% | 18.1% | 16.5% | 15.9% |
| FLJ20084      | 54814  | 14.7% | 18.0% | 14.9% | 15.9% |
| C1orf45       | 448834 | 33.3% | 0.0%  | 14.3% | 15.9% |
| FLJ20399      | 54920  | 14.4% | 8.6%  | 24.7% | 15.9% |
| PTPN3         | 5774   | 21.2% | 13.3% | 13.2% | 15.9% |
| ASTN          | 460    | 18.8% | 8.9%  | 19.9% | 15.9% |
| ZBTB7         | 51341  | 23.6% | 13.2% | 10.8% | 15.9% |
| KHDRB53       | 10656  | 26.3% | 10.4% | 11.0% | 15.9% |
| PDE1A         | 5136   | 31.4% | 4.5%  | 11.8% | 15.9% |
| KIAA0543      | 23145  | 12.1% | 10.4% | 25.2% | 15.9% |
| RBX1          | 9978   | 22.2% | 5.0%  | 20.4% | 15.9% |
| LENG4         | 79143  | 15.2% | 10.3% | 22.1% | 15.9% |
| LEP17         | 353145 | 19.9% | 8.7%  | 19.1% | 15.9% |
| BAPX1         | 579    | 14.2% | 12.3% | 21.2% | 15.9% |
| NDUFA9        | 4704   | 17.9% | 13.8% | 16.0% | 15.9% |
| GPR23         | 2846   | 14.7% | 14.4% | 18.6% | 15.9% |
| NEF3          | 4741   | 16.7% | 4.4%  | 26.7% | 15.9% |
| LOC146712     | 146712 | 11.4% | 11.4% | 25.0% | 15.9% |
| DMRT1         | 63947  | 12.1% | 19.4% | 16.2% | 15.9% |
| SCN9A         | 6335   | 18.1% | 9.2%  | 20.5% | 15.9% |
| PRG2          | 79948  | 11.9% | 14.8% | 21.0% | 15.9% |
| GPR173        | 54328  | 19.9% | 21.4% | 6.5%  | 15.9% |
| RIMS4         | 140730 | 18.7% | 14.3% | 14.8% | 15.9% |
| IRX5          | 10265  | 16.8% | 20.2% | 10.8% | 15.9% |
| HIST1H3H      | 8357   | 28.0% | 15.0% | 4.8%  | 15.9% |
| SF3A2         | 8175   | 27.8% | 20.0% | 0.0%  | 15.9% |
| LOC65243      | 65243  | 15.7% | 5.5%  | 26.6% | 15.9% |
| MGC59937      | 375791 | 12.2% | 23.1% | 12.5% | 15.9% |
| MGC15397      | 90407  | 10.8% | 10.6% | 26.4% | 15.9% |
| FMR2          | 2334   | 12.0% | 7.2%  | 28.6% | 15.9% |
| LMX1B         | 4010   | 13.9% | 19.8% | 14.2% | 15.9% |
| SLPI          | 6590   | 18.5% | 11.1% | 18.3% | 15.9% |
| UNQ827        | 400830 | 15.1% | 8.1%  | 24.6% | 15.9% |
| C9ORF61       | 9413   | 20.7% | 16.7% | 10.5% | 15.9% |
| DKFZP566M1046 | 84067  | 21.3% | 5.3%  | 21.2% | 15.9% |
| LRP2          | 4036   | 23.4% | 4.4%  | 20.1% | 15.9% |
| CTGLF4        | 653268 | 16.5% | 10.6% | 20.8% | 15.9% |
| UBE2J1        | 51465  | 16.0% | 16.9% | 14.9% | 15.9% |
| MGRN1         | 23295  | 21.5% | 9.3%  | 17.1% | 16.0% |
| CTSE          | 1510   | 14.6% | 11.4% | 21.8% | 16.0% |
| FKBP6         | 8468   | 25.8% | 3.4%  | 18.8% | 16.0% |
| LOC388633     | 388633 | 20.5% | 3.2%  | 24.2% | 16.0% |
| SLC22A13      | 9390   | 24.1% | 8.0%  | 15.7% | 16.0% |
| FLJ46154      | 196296 | 16.2% | 4.1%  | 27.7% | 16.0% |
| FLJ46072      | 286077 | 14.2% | 18.6% | 15.1% | 16.0% |
| STAT6         | 6778   | 26.7% | 9.3%  | 11.9% | 16.0% |
| FLJ23514      | 60494  | 7.3%  | 17.2% | 23.4% | 16.0% |
| KIAA1107      | 23285  | 14.2% | 16.8% | 16.9% | 16.0% |
| ASB1          | 51665  | 17.8% | 11.3% | 18.8% | 16.0% |
| MGC16943      | 112479 | 6.0%  | 23.1% | 18.8% | 16.0% |
| OR2B11        | 127623 | 29.5% | 9.3%  | 9.2%  | 16.0% |
| TRIP6         | 7205   | 26.3% | 10.0% | 11.6% | 16.0% |
| KIAA1586      | 57691  | 14.3% | 19.3% | 14.4% | 16.0% |
| UBE2R2        | 54926  | 23.4% | 7.3%  | 17.2% | 16.0% |
| EPHA5         | 2044   | 20.4% | 15.3% | 12.2% | 16.0% |
| NDUFA6        | 4700   | 5.0%  | 13.8% | 29.2% | 16.0% |
| FLJ45651      | 123745 | 11.0% | 15.3% | 21.7% | 16.0% |
| PTPRU         | 10076  | 11.5% | 27.8% | 8.7%  | 16.0% |
| IL12RB1       | 3594   | 18.0% | 6.5%  | 23.5% | 16.0% |
| LOC158724     | 158724 | 9.5%  | 9.9%  | 28.6% | 16.0% |
| EGFL5         | 1955   | 9.7%  | 12.0% | 26.3% | 16.0% |
| RAB5C         | 5878   | 34.0% | 8.1%  | 5.8%  | 16.0% |
| DDX3X         | 1654   | 24.0% | 7.7%  | 16.3% | 16.0% |
| LOC91120      | 91120  | 14.7% | 13.2% | 20.1% | 16.0% |
| EIF5A         | 1984   | 17.4% | 8.9%  | 21.7% | 16.0% |
| KIF1C         | 10749  | 17.6% | 8.2%  | 22.2% | 16.0% |
| AASDH         | 132949 | 18.5% | 13.4% | 16.1% | 16.0% |
| SSPN          | 8082   | 15.6% | 12.7% | 19.8% | 16.0% |
| PPP4C         | 5531   | 22.5% | 20.8% | 4.8%  | 16.0% |
| WNT7B         | 7477   | 14.5% | 13.1% | 20.5% | 16.0% |
| FOXF1         | 2294   | 25.6% | 10.5% | 11.9% | 16.0% |
| CRHR1         | 1394   | 23.6% | 15.7% | 8.8%  | 16.0% |
| HUMGT198A     | 29893  | 15.0% | 5.0%  | 28.1% | 16.0% |
| ARHGAP11A     | 9824   | 12.6% | 21.9% | 13.6% | 16.0% |
| SLC27A5       | 10998  | 17.7% | 8.4%  | 21.9% | 16.0% |
| LIN7B         | 64130  | 18.9% | 10.5% | 18.7% | 16.0% |
| MGC24137      | 143503 | 22.0% | 13.6% | 12.5% | 16.0% |
| PTPN18        | 26469  | 13.6% | 19.0% | 15.5% | 16.0% |
| LOC442582     | 442582 | 5.1%  | 20.0% | 23.0% | 16.0% |
| GABRB2        | 2561   | 23.9% | 6.0%  | 18.2% | 16.0% |

|               |        |       |       |       |       |
|---------------|--------|-------|-------|-------|-------|
| BST2          | 684    | 16.8% | 15.3% | 16.1% | 16.0% |
| MGC35402      | 399669 | 28.9% | 15.6% | 3.6%  | 16.0% |
| MGC13125      | 84811  | 9.1%  | 6.0%  | 33.0% | 16.0% |
| RP11-186O14.2 | 643414 | 15.6% | 12.8% | 19.8% | 16.0% |
| CLIC6         | 54102  | 15.0% | 17.2% | 16.0% | 16.0% |
| HDAC7A        | 51564  | 17.8% | 15.2% | 15.1% | 16.0% |
| LOC283116     | 283116 | 20.2% | 11.3% | 16.7% | 16.1% |
| NAGPA         | 51172  | 32.5% | 6.6%  | 9.0%  | 16.1% |
| KIAA1126      | 57210  | 5.6%  | 10.3% | 32.3% | 16.1% |
| KIAA0020      | 9933   | 10.8% | 14.3% | 23.1% | 16.1% |
| ENAH          | 55740  | 13.5% | 15.4% | 19.3% | 16.1% |
| C14ORF150     | 112840 | 18.1% | 7.5%  | 22.6% | 16.1% |
| TBX19         | 9095   | 23.6% | 6.8%  | 17.8% | 16.1% |
| HNRPAB        | 3182   | 14.6% | 15.5% | 18.1% | 16.1% |
| HHLA3         | 11147  | 21.9% | 7.9%  | 18.5% | 16.1% |
| MAP1LC3A      | 84557  | 11.9% | 22.0% | 14.3% | 16.1% |
| HPRP8BP       | 9410   | 15.4% | 12.4% | 20.4% | 16.1% |
| FLJ25555      | 124930 | 17.4% | 17.5% | 13.3% | 16.1% |
| ZNF407        | 55628  | 23.0% | 4.9%  | 20.4% | 16.1% |
| PLA2G6        | 8398   | 11.6% | 17.9% | 18.8% | 16.1% |
| CGB2          | 114336 | 21.7% | 12.3% | 14.3% | 16.1% |
| ABCG4         | 64137  | 21.8% | 18.0% | 8.5%  | 16.1% |
| LACTB2        | 51110  | 26.2% | 9.6%  | 12.5% | 16.1% |
| TLR7          | 51284  | 31.7% | 1.9%  | 14.6% | 16.1% |
| PAP           | 5068   | 28.0% | 5.1%  | 15.3% | 16.1% |
| PON3          | 5446   | 25.4% | 8.4%  | 14.5% | 16.1% |
| BZRPL1        | 222642 | 29.4% | 5.1%  | 13.9% | 16.1% |
| NPHS2         | 7827   | 22.1% | 12.3% | 14.0% | 16.1% |
| LOC387778     | 387778 | 5.7%  | 4.9%  | 37.7% | 16.1% |
| FSCN3         | 29999  | 22.4% | 12.4% | 13.6% | 16.1% |
| NEUROG3       | 50674  | 28.8% | 7.7%  | 11.9% | 16.1% |
| NESG1         | 25790  | 8.0%  | 18.4% | 22.0% | 16.1% |
| RERE          | 473    | 15.7% | 17.8% | 14.9% | 16.1% |
| ACRV1         | 56     | 9.4%  | 13.3% | 25.7% | 16.1% |
| REG4          | 83998  | 15.4% | 20.2% | 12.7% | 16.1% |
| OR1D5         | 8386   | 7.6%  | 22.5% | 18.3% | 16.1% |
| WNT3A         | 89780  | 13.7% | 15.8% | 18.9% | 16.1% |
| DDR2          | 4921   | 10.8% | 22.9% | 14.7% | 16.1% |
| YY2           | 404281 | 14.1% | 16.0% | 18.3% | 16.1% |
| GATAD1        | 57798  | 15.2% | 15.8% | 17.5% | 16.1% |
| SYMPK         | 8189   | 26.9% | 11.8% | 9.8%  | 16.1% |
| NDUFC2        | 4718   | 14.1% | 18.4% | 16.0% | 16.2% |
| IVL           | 3713   | 10.3% | 14.6% | 23.5% | 16.2% |
| ARVCF         | 421    | 16.4% | 10.3% | 21.7% | 16.2% |
| FPRL2         | 2359   | 17.9% | 17.9% | 12.7% | 16.2% |
| RORC          | 6097   | 13.2% | 16.1% | 19.2% | 16.2% |
| AEBP1         | 165    | 15.2% | 8.3%  | 25.0% | 16.2% |
| RAB17         | 64284  | 16.5% | 13.1% | 18.9% | 16.2% |
| ENTPD5        | 957    | 34.5% | 6.0%  | 8.0%  | 16.2% |
| E2F4          | 1874   | 26.3% | 7.1%  | 15.1% | 16.2% |
| KRT3          | 3850   | 27.6% | 0.0%  | 20.9% | 16.2% |
| SH2D3C        | 10044  | 23.4% | 12.5% | 12.7% | 16.2% |
| AGXT2L1       | 64850  | 12.5% | 9.4%  | 26.7% | 16.2% |
| CSF1R         | 1436   | 16.4% | 15.2% | 17.0% | 16.2% |
| CD1D          | 912    | 16.3% | 15.1% | 17.2% | 16.2% |
| HSPC148       | 51503  | 20.9% | 12.5% | 15.2% | 16.2% |
| KIF9          | 64147  | 19.6% | 14.4% | 14.5% | 16.2% |
| LOC152877     | 152877 | 12.4% | 11.1% | 25.1% | 16.2% |
| GRAMD3        | 65983  | 24.0% | 9.2%  | 15.4% | 16.2% |
| C20ORF106     | 200232 | 9.3%  | 15.0% | 24.2% | 16.2% |
| ELMO3         | 79767  | 22.0% | 11.5% | 15.1% | 16.2% |
| BANP          | 54971  | 23.2% | 9.3%  | 16.1% | 16.2% |
| MGC26885      | 124044 | 16.2% | 5.7%  | 26.7% | 16.2% |
| TEX10         | 54881  | 32.6% | 8.1%  | 7.9%  | 16.2% |
| NKIRAS1       | 28512  | 26.4% | 11.5% | 10.7% | 16.2% |
| ZFPL1         | 7542   | 16.1% | 15.6% | 17.0% | 16.2% |
| PPBP          | 5473   | 21.6% | 5.8%  | 21.3% | 16.2% |
| MRGBPRG       | 386746 | 15.5% | 14.2% | 19.0% | 16.2% |
| DHX15         | 1665   | 18.8% | 12.4% | 17.5% | 16.2% |
| RAB39B        | 116442 | 28.4% | 5.3%  | 15.0% | 16.2% |
| AD023         | 57409  | 19.8% | 6.7%  | 22.2% | 16.2% |
| CDA08         | 81533  | 13.3% | 10.3% | 25.1% | 16.2% |
| C11ORF16      | 56673  | 20.7% | 6.3%  | 21.8% | 16.2% |
| ATP6V1G2      | 534    | 9.9%  | 24.0% | 14.8% | 16.3% |
| KIFC3         | 3801   | 30.2% | 9.8%  | 8.8%  | 16.3% |
| MGC15407      | 112942 | 17.3% | 11.5% | 20.0% | 16.3% |
| TRIP13        | 9319   | 11.8% | 13.4% | 23.6% | 16.3% |
| DKFZP667B1218 | 201626 | 14.3% | 6.4%  | 28.1% | 16.3% |
| CDK5R1        | 8851   | 17.4% | 11.4% | 20.0% | 16.3% |
| DDX1          | 1653   | 28.6% | 4.3%  | 15.9% | 16.3% |
| KCNE2         | 9992   | 25.6% | 8.4%  | 14.9% | 16.3% |
| RNF123        | 63891  | 16.4% | 9.9%  | 22.6% | 16.3% |
| RNASEH2A      | 10535  | 20.3% | 17.3% | 11.3% | 16.3% |
| P30           | 201161 | 13.8% | 14.1% | 20.9% | 16.3% |
| ZNF646        | 9726   | 17.9% | 8.5%  | 22.4% | 16.3% |
| TXNDC9        | 10190  | 14.8% | 14.8% | 19.3% | 16.3% |
| ATP6V1A       | 523    | 14.7% | 18.0% | 16.1% | 16.3% |
| MGC34079      | 147687 | 19.3% | 10.3% | 19.4% | 16.3% |
| MEST          | 4232   | 16.9% | 18.4% | 13.6% | 16.3% |
| POLR2G        | 5436   | 25.0% | 3.2%  | 20.7% | 16.3% |
| DKFZP434L142  | 51313  | 8.7%  | 14.5% | 25.7% | 16.3% |
| BAT2          | 7916   | 23.2% | 8.2%  | 17.6% | 16.3% |
| HDAC8         | 55869  | 25.7% | 6.6%  | 16.7% | 16.3% |
| FER1L3        | 26509  | 17.0% | 12.5% | 19.4% | 16.3% |
| ACTA2         | 59     | 16.7% | 13.5% | 18.8% | 16.3% |
| PDZK4         | 57595  | 15.3% | 16.7% | 16.9% | 16.3% |
| SFRS9         | 8683   | 19.2% | 7.6%  | 22.2% | 16.3% |
| PPP6C         | 5537   | 14.9% | 22.7% | 11.4% | 16.3% |

|           |        |       |       |       |       |
|-----------|--------|-------|-------|-------|-------|
| SLC12A3   | 6559   | 26.4% | 7.0%  | 15.6% | 16.3% |
| FLJ20758  | 55037  | 13.3% | 9.8%  | 25.8% | 16.3% |
| CHST6     | 4166   | 16.8% | 12.8% | 19.4% | 16.3% |
| C10ORF89  | 118672 | 16.9% | 19.6% | 12.5% | 16.3% |
| PPRC1     | 23082  | 7.5%  | 23.5% | 18.1% | 16.3% |
| ZXDB      | 158586 | 19.3% | 19.0% | 10.7% | 16.3% |
| IL9       | 3578   | 19.0% | 15.6% | 14.4% | 16.3% |
| ENTPD7    | 57089  | 15.0% | 12.1% | 21.9% | 16.3% |
| LOC405753 | 405753 | 19.4% | 4.7%  | 25.0% | 16.3% |
| CTDSP1    | 58190  | 10.0% | 22.7% | 16.4% | 16.4% |
| SSTR2     | 6752   | 19.0% | 14.8% | 15.4% | 16.4% |
| MYL1      | 4632   | 23.6% | 13.0% | 12.4% | 16.4% |
| KIN       | 22944  | 19.2% | 17.5% | 12.4% | 16.4% |
| RGN       | 9104   | 25.0% | 9.6%  | 14.5% | 16.4% |
| CSHL1     | 1444   | 20.0% | 21.6% | 7.5%  | 16.4% |
| FTSJ1     | 24140  | 12.5% | 21.6% | 15.0% | 16.4% |
| MDC1      | 9656   | 24.3% | 9.6%  | 15.2% | 16.4% |
| JUND      | 3727   | 19.1% | 7.7%  | 22.2% | 16.4% |
| C20ORF27  | 54976  | 15.9% | 15.6% | 17.6% | 16.4% |
| LOC126017 | 126017 | 13.8% | 7.7%  | 27.7% | 16.4% |
| RTN2      | 6253   | 19.0% | 14.3% | 15.8% | 16.4% |
| AES       | 166    | 19.6% | 16.8% | 12.8% | 16.4% |
| ORZA25    | 392138 | 12.5% | 25.0% | 11.6% | 16.4% |
| DEFB125   | 245938 | 7.6%  | 18.4% | 23.1% | 16.4% |
| DCN       | 1634   | 22.1% | 9.3%  | 17.7% | 16.4% |
| FIP1L1    | 81608  | 26.7% | 11.7% | 10.7% | 16.4% |
| ZNF238    | 10472  | 16.2% | 11.3% | 21.6% | 16.4% |
| KIAA0563  | 9884   | 16.2% | 20.0% | 12.9% | 16.4% |
| TAS2R39   | 259285 | 6.7%  | 22.1% | 20.3% | 16.4% |
| KIAA0436  | 9581   | 8.8%  | 20.3% | 20.0% | 16.4% |
| ARID3B    | 10620  | 9.8%  | 15.3% | 24.1% | 16.4% |
| PXMP4     | 11264  | 11.3% | 18.9% | 19.0% | 16.4% |
| HRMT1L6   | 55170  | 19.9% | 15.7% | 13.7% | 16.4% |
| PCSK1N    | 27344  | 17.0% | 5.5%  | 26.7% | 16.4% |
| MGC23244  | 126259 | 12.3% | 14.0% | 22.9% | 16.4% |
| FLJ12895  | 65982  | 16.1% | 7.9%  | 25.1% | 16.4% |
| RPS9      | 6203   | 14.3% | 11.1% | 23.8% | 16.4% |
| KLHL15    | 80311  | 24.4% | 11.4% | 13.4% | 16.4% |
| SCNN1D    | 6339   | 20.3% | 11.1% | 17.8% | 16.4% |
| TCF3      | 6929   | 9.9%  | 24.6% | 14.8% | 16.4% |
| LIN9      | 286826 | 6.7%  | 23.7% | 18.8% | 16.4% |
| TCEB1     | 6921   | 10.1% | 24.8% | 14.3% | 16.4% |
| ATP6V1G1  | 9550   | 15.5% | 19.3% | 14.5% | 16.4% |
| LCMT2     | 9836   | 18.8% | 19.2% | 11.3% | 16.4% |
| GOSR1     | 9527   | 13.6% | 18.9% | 16.7% | 16.4% |
| FLJ11021  | 65117  | 15.1% | 3.8%  | 30.4% | 16.4% |
| BCLP      | 113452 | 8.4%  | 11.9% | 29.0% | 16.4% |
| MGC3731   | 79159  | 16.6% | 10.0% | 22.6% | 16.4% |
| FOLR2     | 2350   | 23.2% | 6.5%  | 19.5% | 16.4% |
| GTf2B     | 2959   | 21.9% | 16.4% | 11.0% | 16.4% |
| PLA2G3    | 50487  | 21.2% | 9.1%  | 19.0% | 16.4% |
| ZNF550    | 162972 | 19.7% | 14.3% | 15.3% | 16.4% |
| CA3       | 761    | 8.3%  | 22.3% | 18.7% | 16.4% |
| SPACA1    | 81833  | 15.0% | 13.2% | 21.1% | 16.4% |
| TP73L     | 8626   | 15.5% | 10.7% | 23.1% | 16.4% |
| POU3F3    | 5455   | 26.7% | 0.0%  | 22.6% | 16.4% |
| ADFP      | 123    | 27.5% | 8.5%  | 13.3% | 16.4% |
| LOC57168  | 57168  | 24.6% | 3.3%  | 21.4% | 16.4% |
| FLJ31265  | 131870 | 22.8% | 8.0%  | 18.6% | 16.4% |
| PRKWNK1   | 65125  | 15.5% | 22.8% | 11.1% | 16.4% |
| IL1A      | 3552   | 27.1% | 3.6%  | 18.7% | 16.4% |
| SMPD3     | 55512  | 22.9% | 12.0% | 14.5% | 16.4% |
| KIAA1052  | 22897  | 12.5% | 12.3% | 24.6% | 16.5% |
| FLJ46481  | 389197 | 11.6% | 15.6% | 22.2% | 16.5% |
| TSPYL2    | 64061  | 25.7% | 15.9% | 7.8%  | 16.5% |
| FLJ40243  | 133558 | 19.7% | 12.4% | 17.3% | 16.5% |
| FGG       | 2266   | 18.3% | 14.5% | 16.5% | 16.5% |
| STCH      | 6782   | 20.2% | 18.5% | 10.7% | 16.5% |
| TSPAN-1   | 10103  | 12.6% | 11.2% | 25.6% | 16.5% |
| ACACB     | 32     | 23.2% | 6.3%  | 19.9% | 16.5% |
| LOC163782 | 163782 | 12.1% | 9.7%  | 27.6% | 16.5% |
| MYT1L     | 23040  | 20.0% | 15.4% | 14.0% | 16.5% |
| LOC154288 | 154288 | 11.3% | 11.0% | 27.2% | 16.5% |
| CCR8      | 1237   | 16.7% | 13.3% | 19.4% | 16.5% |
| FLJ22301  | 79894  | 13.2% | 12.1% | 24.2% | 16.5% |
| GRIN2D    | 2906   | 20.1% | 13.3% | 16.1% | 16.5% |
| RGPR      | 89866  | 12.8% | 17.2% | 19.4% | 16.5% |
| FLJ12787  | 84135  | 13.1% | 18.3% | 18.1% | 16.5% |
| FLJ13149  | 60493  | 20.7% | 9.0%  | 19.8% | 16.5% |
| H1FO      | 3005   | 22.6% | 10.0% | 16.8% | 16.5% |
| AANAT     | 15     | 20.1% | 8.7%  | 20.6% | 16.5% |
| MRPS23    | 51649  | 10.5% | 21.7% | 17.3% | 16.5% |
| SNAPC2    | 6618   | 22.6% | 8.9%  | 18.0% | 16.5% |
| ICAM3     | 3385   | 18.5% | 20.2% | 10.8% | 16.5% |
| GJB4      | 127534 | 27.7% | 7.4%  | 14.3% | 16.5% |
| LOC401827 | 401827 | 17.8% | 10.7% | 21.1% | 16.5% |
| FLJ31434  | 149175 | 12.7% | 6.3%  | 30.6% | 16.5% |
| FRMD3     | 257019 | 14.7% | 11.0% | 23.8% | 16.5% |
| UBN1      | 29855  | 18.5% | 15.5% | 15.6% | 16.5% |
| FLJ22104  | 65084  | 15.4% | 3.5%  | 30.7% | 16.5% |
| TNFRSF6B  | 8771   | 6.5%  | 14.8% | 28.4% | 16.5% |
| LOC91937  | 91937  | 10.9% | 9.3%  | 29.4% | 16.5% |
| TMEM35    | 59353  | 21.0% | 12.9% | 15.7% | 16.5% |
| KCNA1     | 3736   | 22.8% | 6.9%  | 19.9% | 16.5% |
| DNCL2B    | 83657  | 28.9% | 11.5% | 9.2%  | 16.5% |
| G6PC      | 2538   | 14.5% | 18.9% | 16.2% | 16.5% |
| MO25      | 51719  | 14.0% | 10.3% | 25.3% | 16.5% |
| ZFP42     | 132625 | 15.5% | 19.7% | 14.4% | 16.5% |

|               |           |       |       |       |       |
|---------------|-----------|-------|-------|-------|-------|
| FLJ12748      | 79929     | 11.8% | 9.8%  | 28.0% | 16.5% |
| LOC286148     | 286148    | 17.4% | 4.8%  | 27.5% | 16.5% |
| KNTC2         | 10403     | 20.0% | 0.0%  | 29.6% | 16.5% |
| PP2447        | 80305     | 6.5%  | 12.2% | 30.9% | 16.5% |
| FLJ23614      | 203523    | 15.4% | 17.6% | 16.6% | 16.5% |
| POLR2J3       | 548644    | 21.1% | 3.2%  | 25.4% | 16.6% |
| FLJ25056      | 196446    | 7.6%  | 8.3%  | 33.7% | 16.6% |
| KUB3          | 91419     | 14.3% | 25.3% | 10.0% | 16.6% |
| ITGA3         | 3675      | 12.9% | 17.6% | 19.1% | 16.6% |
| ZFYVE28       | 57732     | 15.4% | 15.0% | 19.3% | 16.6% |
| TCTE3         | 6991      | 15.5% | 9.7%  | 24.5% | 16.6% |
| MGC10715      | 79175     | 12.8% | 16.4% | 20.5% | 16.6% |
| LOC51233      | 51233     | 20.8% | 13.6% | 15.3% | 16.6% |
| ZC3HDC8       | 84524     | 20.7% | 9.1%  | 19.9% | 16.6% |
| LOC196463     | 196463    | 17.3% | 12.7% | 19.8% | 16.6% |
| PDGFRA        | 5156      | 20.6% | 11.7% | 17.4% | 16.6% |
| MLC15A        | 140465    | 1.8%  | 12.8% | 35.1% | 16.6% |
| PHOX2B        | 8929      | 28.7% | 6.2%  | 14.8% | 16.6% |
| DEFB136       | 613209    | 25.2% | 8.5%  | 16.1% | 16.6% |
| HERC2         | 8924      | 27.5% | 7.2%  | 15.1% | 16.6% |
| EPN1          | 29924     | 20.4% | 16.3% | 13.1% | 16.6% |
| TSTA3         | 7264      | 20.0% | 8.3%  | 21.5% | 16.6% |
| IFIT4         | 3437      | 11.7% | 20.4% | 17.6% | 16.6% |
| FLJ23598      | 79841     | 17.7% | 17.8% | 14.3% | 16.6% |
| TAF6L         | 10629     | 25.9% | 13.3% | 10.6% | 16.6% |
| SMAP-1        | 55898     | 15.6% | 6.3%  | 27.9% | 16.6% |
| SEC22L2       | 26984     | 17.2% | 7.4%  | 25.2% | 16.6% |
| NYD-SP12      | 83893     | 17.6% | 10.6% | 21.6% | 16.6% |
| RAPSN         | 5913      | 23.6% | 9.3%  | 16.9% | 16.6% |
| MGC33486      | 256472    | 13.6% | 13.7% | 22.6% | 16.6% |
| FLJ42925      | 347404    | 13.3% | 11.2% | 25.4% | 16.6% |
| BARX1         | 56033     | 19.0% | 17.9% | 12.9% | 16.6% |
| KIAA0446      | 9673      | 20.3% | 12.4% | 17.2% | 16.6% |
| GPKOW         | 27238     | 23.1% | 14.3% | 12.5% | 16.6% |
| VTN           | 7448      | 14.2% | 21.2% | 14.5% | 16.6% |
| TRPC4         | 7223      | 23.2% | 11.7% | 15.0% | 16.6% |
| CD247         | 919       | 22.8% | 12.4% | 14.8% | 16.6% |
| SLC4A7        | 9497      | 27.0% | 10.2% | 12.8% | 16.6% |
| EYA4          | 2070      | 20.1% | 15.0% | 14.8% | 16.6% |
| FARP1         | 10160     | 25.0% | 19.1% | 5.8%  | 16.6% |
| SYT11         | 23208     | 25.5% | 14.5% | 9.9%  | 16.6% |
| BRD7          | 29117     | 13.3% | 10.4% | 26.3% | 16.6% |
| LOC644006     | 644006    | 23.5% | 9.2%  | 17.3% | 16.6% |
| CACNA1H       | 8912      | 15.0% | 16.9% | 18.0% | 16.6% |
| HMG1          | 3150      | 18.4% | 9.1%  | 22.4% | 16.7% |
| CML2          | 51471     | 18.7% | 17.4% | 13.8% | 16.7% |
| LCE4A         | 199834    | 19.6% | 11.5% | 18.9% | 16.7% |
| SNX8          | 29886     | 10.7% | 18.9% | 20.4% | 16.7% |
| CXCL6         | 6372      | 11.0% | 14.0% | 24.9% | 16.7% |
| PVR           | 5817      | 50.0% | 0.0%  | 0.0%  | 16.7% |
| KIAA1949      | 170954    | 17.7% | 7.7%  | 24.6% | 16.7% |
| SORCS2        | 57537     | 20.6% | 15.4% | 14.0% | 16.7% |
| ASC1P100      | 84164     | 16.8% | 7.3%  | 25.9% | 16.7% |
| DKFZP761E198  | 91056     | 17.0% | 11.1% | 22.0% | 16.7% |
| MGC20983      | 115948    | 25.4% | 11.3% | 13.4% | 16.7% |
| DNAJC5        | 80331     | 25.8% | 16.3% | 7.9%  | 16.7% |
| PANK2         | 80025     | 15.1% | 17.9% | 17.1% | 16.7% |
| NUDT13        | 25961     | 21.1% | 6.4%  | 22.6% | 16.7% |
| MGC52498      | 348378    | 17.4% | 13.3% | 19.4% | 16.7% |
| CDK2          | 1017      | 19.6% | 17.5% | 13.0% | 16.7% |
| NFS1          | 9054      | 21.7% | 0.0%  | 28.3% | 16.7% |
| RPL28         | 6158      | 23.5% | 10.1% | 16.4% | 16.7% |
| SCARF1        | 8578      | 22.8% | 15.7% | 11.6% | 16.7% |
| FHOD1         | 29109     | 21.6% | 12.9% | 15.6% | 16.7% |
| ANKRD10       | 55608     | 17.6% | 17.3% | 15.2% | 16.7% |
| GAGE8         | 100101629 | 27.3% | 8.9%  | 13.9% | 16.7% |
| CRISP2        | 7180      | 31.6% | 6.7%  | 11.7% | 16.7% |
| TDG           | 6996      | 15.6% | 18.8% | 15.7% | 16.7% |
| RP6-166C19.1  | 728096    | 23.1% | 12.4% | 14.7% | 16.7% |
| PIN4          | 5303      | 26.7% | 10.9% | 12.6% | 16.7% |
| MFNG          | 4242      | 22.8% | 12.0% | 15.3% | 16.7% |
| DKFZP566N034  | 81615     | 13.4% | 7.6%  | 29.1% | 16.7% |
| C16ORF34      | 90861     | 11.5% | 19.2% | 19.4% | 16.7% |
| UQCRB         | 7381      | 18.4% | 21.8% | 10.0% | 16.7% |
| TCEB3         | 6924      | 23.2% | 10.1% | 16.9% | 16.7% |
| FLJ20604      | 54995     | 16.1% | 8.6%  | 25.5% | 16.7% |
| RHOU          | 58480     | 18.3% | 12.1% | 19.8% | 16.7% |
| SHBG          | 6462      | 11.6% | 16.9% | 21.6% | 16.7% |
| GHRH          | 2691      | 19.6% | 7.3%  | 23.3% | 16.7% |
| C17orf41      | 79915     | 18.8% | 9.5%  | 21.9% | 16.7% |
| IRLB          | 10260     | 21.1% | 13.3% | 15.8% | 16.7% |
| C21ORF107     | 54014     | 18.1% | 7.9%  | 24.2% | 16.7% |
| OTUD7         | 161725    | 14.1% | 10.6% | 25.6% | 16.7% |
| HIST1H2AG     | 8969      | 16.9% | 16.3% | 16.9% | 16.7% |
| FLJ30313      | 253868    | 15.9% | 20.2% | 14.1% | 16.7% |
| ZNHIT1        | 10467     | 16.1% | 10.8% | 23.3% | 16.7% |
| GPR45         | 11250     | 16.5% | 14.3% | 19.3% | 16.7% |
| LOC347487     | 347487    | 10.5% | 11.1% | 28.6% | 16.7% |
| DKFZP586L0724 | 25926     | 15.9% | 19.5% | 14.8% | 16.7% |
| PAWR          | 5074      | 15.7% | 11.6% | 22.9% | 16.7% |
| NEUGRIN       | 51335     | 7.7%  | 11.1% | 31.4% | 16.7% |
| STK24         | 8428      | 15.8% | 14.1% | 20.2% | 16.7% |
| UNQ644        | 374918    | 11.9% | 11.9% | 26.4% | 16.7% |
| MGC52022      | 375346    | 13.8% | 5.9%  | 30.5% | 16.7% |
| LOC388818     | 388818    | 14.0% | 6.4%  | 29.8% | 16.7% |
| KIAA1509      | 440193    | 25.7% | 14.3% | 10.3% | 16.8% |
| WDHD1         | 11169     | 25.5% | 11.4% | 13.4% | 16.8% |
| LOC387733     | 387733    | 14.0% | 12.2% | 24.0% | 16.8% |

|              |        |       |       |       |       |
|--------------|--------|-------|-------|-------|-------|
| KSR2         | 283455 | 8.9%  | 17.1% | 24.3% | 16.8% |
| KCN7         | 3743   | 18.7% | 10.4% | 21.1% | 16.8% |
| STX11        | 8676   | 15.8% | 14.6% | 19.8% | 16.8% |
| SMP3         | 80235  | 29.6% | 6.6%  | 14.1% | 16.8% |
| CRYAA        | 1409   | 13.7% | 17.1% | 19.4% | 16.8% |
| GLRA1        | 2741   | 12.5% | 7.3%  | 30.5% | 16.8% |
| NP0007       | 57414  | 11.6% | 15.0% | 23.7% | 16.8% |
| SLC2A2       | 6514   | 9.1%  | 14.3% | 26.9% | 16.8% |
| OR6C3        | 254786 | 13.7% | 17.0% | 19.6% | 16.8% |
| NCALD        | 83988  | 5.8%  | 23.3% | 21.2% | 16.8% |
| DDOST        | 1650   | 20.9% | 10.9% | 18.5% | 16.8% |
| MYBPC3       | 4607   | 29.2% | 12.3% | 8.9%  | 16.8% |
| PEX7         | 5191   | 16.1% | 15.2% | 19.0% | 16.8% |
| FLJ14825     | 84933  | 13.5% | 15.5% | 21.3% | 16.8% |
| LOC389816    | 389816 | 15.5% | 7.4%  | 27.4% | 16.8% |
| SERPINH1     | 871    | 15.1% | 16.6% | 18.7% | 16.8% |
| FLJ14001     | 79730  | 24.8% | 18.8% | 6.8%  | 16.8% |
| PLAC4        | 191585 | 17.2% | 13.8% | 19.3% | 16.8% |
| KIAA0258     | 9827   | 25.0% | 16.5% | 8.9%  | 16.8% |
| IL18BP       | 10068  | 24.2% | 10.6% | 15.5% | 16.8% |
| CYB561       | 1534   | 21.4% | 11.5% | 17.4% | 16.8% |
| RP6-166C19.4 | 728075 | 18.0% | 17.8% | 14.6% | 16.8% |
| GATA1        | 2623   | 30.7% | 5.5%  | 14.2% | 16.8% |
| FLJ12118     | 79587  | 17.3% | 4.7%  | 28.4% | 16.8% |
| PAEP         | 5047   | 22.6% | 15.4% | 12.3% | 16.8% |
| MAN2A2       | 4122   | 17.9% | 12.7% | 19.7% | 16.8% |
| NOMO2        | 283820 | 13.6% | 18.2% | 18.6% | 16.8% |
| FLJ21148     | 79918  | 13.0% | 16.8% | 20.5% | 16.8% |
| RNF151       | 146310 | 23.1% | 10.5% | 16.8% | 16.8% |
| FZD3         | 7976   | 20.7% | 14.8% | 14.9% | 16.8% |
| DBC1         | 1620   | 19.3% | 14.5% | 16.7% | 16.8% |
| GPR68        | 8111   | 21.7% | 14.0% | 14.8% | 16.8% |
| C9ORF11      | 54586  | 23.8% | 11.0% | 15.6% | 16.8% |
| IL17R        | 23765  | 25.4% | 15.3% | 9.7%  | 16.8% |
| TNXB         | 7148   | 13.9% | 18.5% | 18.1% | 16.8% |
| PRKCE        | 5581   | 17.5% | 13.3% | 19.7% | 16.8% |
| BCL2A1       | 597    | 35.2% | 7.2%  | 8.1%  | 16.8% |
| RAMP3        | 10268  | 34.9% | 6.6%  | 8.9%  | 16.8% |
| TRIP4        | 9325   | 18.7% | 11.6% | 20.2% | 16.8% |
| OATL1        | 4943   | 11.1% | 13.3% | 26.2% | 16.8% |
| FAM3A        | 60343  | 28.6% | 9.1%  | 12.8% | 16.8% |
| GDI2         | 2665   | 19.4% | 11.7% | 19.4% | 16.8% |
| GPR48        | 55366  | 12.7% | 22.6% | 15.2% | 16.8% |
| K6HF         | 9119   | 14.4% | 15.7% | 20.4% | 16.8% |
| SPANXA1      | 30014  | 5.3%  | 29.6% | 15.6% | 16.8% |
| MRPL41       | 64975  | 14.6% | 19.4% | 16.6% | 16.8% |
| PPP2CZ       | 333926 | 21.4% | 14.1% | 15.0% | 16.8% |
| C6ORF125     | 84300  | 15.5% | 15.7% | 19.3% | 16.8% |
| ACCN2        | 41     | 22.5% | 6.6%  | 21.4% | 16.8% |
| KAL1         | 3730   | 25.8% | 10.2% | 14.6% | 16.9% |
| LOC339123    | 339123 | 11.9% | 10.7% | 28.0% | 16.9% |
| FGF9         | 2254   | 24.2% | 13.3% | 13.1% | 16.9% |
| KLF16        | 83855  | 28.6% | 9.0%  | 13.0% | 16.9% |
| EVI2B        | 2124   | 22.3% | 10.7% | 17.6% | 16.9% |
| PTE2B        | 122970 | 19.6% | 15.3% | 15.6% | 16.9% |
| ZNF33B       | 7582   | 17.9% | 17.4% | 15.2% | 16.9% |
| GJA8         | 2703   | 30.3% | 8.3%  | 12.0% | 16.9% |
| ELL          | 8178   | 30.3% | 6.4%  | 13.9% | 16.9% |
| ALG2         | 85365  | 20.5% | 19.6% | 10.5% | 16.9% |
| HSPC142      | 29086  | 10.0% | 9.7%  | 30.8% | 16.9% |
| KIAA0317     | 9870   | 22.1% | 12.6% | 15.8% | 16.9% |
| DEFB110      | 245913 | 29.5% | 9.5%  | 11.6% | 16.9% |
| B3GALT3      | 8706   | 26.5% | 14.2% | 10.0% | 16.9% |
| ATP6V1E1     | 529    | 19.6% | 7.3%  | 23.7% | 16.9% |
| AP153        | 130340 | 15.6% | 18.2% | 16.9% | 16.9% |
| CD5L         | 922    | 18.4% | 11.0% | 21.3% | 16.9% |
| VRK1         | 7443   | 17.6% | 23.1% | 9.9%  | 16.9% |
| C1ORF17      | 23127  | 12.0% | 7.7%  | 31.0% | 16.9% |
| RAP2C        | 57826  | 20.0% | 12.5% | 18.2% | 16.9% |
| C1ORF34      | 22996  | 25.7% | 7.5%  | 17.4% | 16.9% |
| PGM2         | 55276  | 13.8% | 13.1% | 23.9% | 16.9% |
| HIS1         | 10614  | 16.4% | 10.1% | 24.3% | 16.9% |
| LOC728137    | 728137 | 27.1% | 4.3%  | 19.3% | 16.9% |
| LOC222171    | 222171 | 15.7% | 12.4% | 22.6% | 16.9% |
| ZNF75A       | 7627   | 23.3% | 12.1% | 15.3% | 16.9% |
| PIK3C2B      | 5287   | 12.5% | 19.4% | 18.8% | 16.9% |
| BAI3         | 577    | 16.9% | 15.3% | 18.5% | 16.9% |
| ATRNL1       | 26033  | 0.0%  | 30.8% | 20.0% | 16.9% |
| KCTD14       | 65987  | 25.3% | 5.7%  | 19.7% | 16.9% |
| LOC284948    | 284948 | 15.0% | 14.9% | 20.9% | 16.9% |
| ARPC3        | 10094  | 28.1% | 6.4%  | 16.3% | 16.9% |
| MYL7         | 58498  | 17.0% | 21.4% | 12.4% | 16.9% |
| FOSL2        | 2355   | 27.2% | 12.3% | 11.3% | 16.9% |
| TBC1D4       | 9882   | 14.3% | 16.1% | 20.4% | 16.9% |
| SMARCB1      | 6598   | 10.4% | 22.2% | 18.2% | 16.9% |
| GPR153       | 387509 | 19.4% | 10.0% | 21.4% | 16.9% |
| CTH          | 1491   | 21.2% | 10.8% | 18.8% | 16.9% |
| ZFYVE26      | 23503  | 24.0% | 13.8% | 13.0% | 16.9% |
| PET112L      | 5188   | 31.1% | 9.2%  | 10.5% | 16.9% |
| HIST1H3D     | 8351   | 20.6% | 8.5%  | 21.8% | 16.9% |
| SPTBN1       | 6711   | 19.0% | 6.3%  | 25.5% | 16.9% |
| STS          | 6764   | 24.5% | 12.7% | 13.6% | 16.9% |
| SGCA         | 6442   | 32.2% | 4.3%  | 14.3% | 16.9% |
| BRPF3        | 27154  | 19.6% | 13.3% | 18.0% | 16.9% |
| KIF5B        | 3799   | 23.7% | 8.6%  | 18.5% | 16.9% |
| VN1R2        | 317701 | 21.6% | 15.1% | 14.2% | 16.9% |
| PROCR        | 10544  | 16.5% | 15.3% | 19.0% | 16.9% |
| CD80         | 941    | 20.3% | 8.4%  | 22.2% | 16.9% |

|               |           |       |       |       |       |
|---------------|-----------|-------|-------|-------|-------|
| RCD-8         | 23644     | 15.0% | 16.8% | 19.1% | 17.0% |
| PES1          | 23481     | 22.8% | 11.3% | 16.8% | 17.0% |
| C20ORF165     | 128497    | 13.6% | 15.2% | 22.0% | 17.0% |
| GUCA2B        | 2981      | 21.2% | 11.8% | 17.9% | 17.0% |
| PERLD1        | 93210     | 23.7% | 8.8%  | 18.4% | 17.0% |
| DKFZP547C195  | 257160    | 22.5% | 15.4% | 13.0% | 17.0% |
| TAS2R38       | 5726      | 14.5% | 16.0% | 20.4% | 17.0% |
| PLXNA1        | 5361      | 17.2% | 26.0% | 7.7%  | 17.0% |
| LOC653140     | 653140    | 17.4% | 7.2%  | 26.4% | 17.0% |
| SMYD5         | 10322     | 23.1% | 5.3%  | 22.5% | 17.0% |
| F2RL1         | 2150      | 12.8% | 14.7% | 23.5% | 17.0% |
| C1QA          | 712       | 20.8% | 11.1% | 19.0% | 17.0% |
| CTDSP2        | 10106     | 14.1% | 19.7% | 17.1% | 17.0% |
| COP           | 114769    | 20.0% | 15.0% | 16.0% | 17.0% |
| C21ORF55      | 54943     | 9.9%  | 14.8% | 26.3% | 17.0% |
| DNAJB2        | 3300      | 0.0%  | 23.5% | 27.4% | 17.0% |
| IL28B         | 282617    | 27.3% | 12.9% | 10.7% | 17.0% |
| KRTHA6        | 8689      | 15.7% | 13.3% | 22.0% | 17.0% |
| LOC54103      | 54103     | 14.5% | 22.8% | 13.7% | 17.0% |
| UBE1          | 7317      | 27.0% | 9.1%  | 14.9% | 17.0% |
| GSH-2         | 170825    | 11.4% | 4.1%  | 35.5% | 17.0% |
| SLC35A4       | 113829    | 25.2% | 12.0% | 13.7% | 17.0% |
| NYD-SP28      | 85478     | 13.0% | 10.4% | 27.5% | 17.0% |
| HELIC1        | 10973     | 19.1% | 15.8% | 16.1% | 17.0% |
| KCTD18        | 130535    | 3.6%  | 23.2% | 24.1% | 17.0% |
| EIF3S1        | 8669      | 15.7% | 19.4% | 15.9% | 17.0% |
| NTSE          | 4907      | 18.1% | 15.0% | 18.0% | 17.0% |
| C20ORF126     | 81572     | 16.9% | 13.0% | 21.1% | 17.0% |
| FGL2          | 10875     | 27.3% | 12.6% | 11.2% | 17.0% |
| ZNF70         | 7621      | 18.4% | 8.6%  | 24.0% | 17.0% |
| IL8RA         | 3577      | 20.6% | 12.9% | 17.5% | 17.0% |
| HAX1          | 10456     | 19.0% | 10.9% | 21.1% | 17.0% |
| MYO48         | 140597    | 16.6% | 10.1% | 24.3% | 17.0% |
| ROXAN         | 23264     | 16.2% | 9.5%  | 25.4% | 17.0% |
| FLJ32000      | 149465    | 15.0% | 11.8% | 24.3% | 17.0% |
| TREM11        | 340205    | 27.6% | 12.9% | 10.5% | 17.0% |
| DERPC         | 54921     | 18.1% | 2.8%  | 30.2% | 17.0% |
| ANKRD16       | 54522     | 22.0% | 12.4% | 16.7% | 17.0% |
| GLRA3         | 8001      | 17.9% | 12.9% | 20.3% | 17.0% |
| C10ORF94      | 93426     | 17.4% | 14.9% | 18.8% | 17.0% |
| TRIM6-TRIM34  | 445372    | 13.0% | 13.0% | 25.0% | 17.0% |
| TRPV6         | 55503     | 15.1% | 20.1% | 15.9% | 17.0% |
| GPR41         | 2865      | 16.1% | 16.2% | 18.7% | 17.0% |
| EME1          | 146956    | 18.8% | 8.8%  | 23.6% | 17.0% |
| FGF14         | 2259      | 9.6%  | 18.2% | 23.3% | 17.0% |
| MSRA          | 4482      | 13.3% | 15.4% | 22.4% | 17.0% |
| FLJ12519      | 84128     | 21.7% | 18.2% | 11.2% | 17.0% |
| KILLIN        | 100144748 | 25.8% | 11.7% | 13.7% | 17.0% |
| PHGDHL1       | 337867    | 15.3% | 9.7%  | 26.2% | 17.0% |
| TMEM48        | 55706     | 17.7% | 14.2% | 19.3% | 17.0% |
| MYADM         | 91663     | 25.7% | 8.0%  | 17.5% | 17.0% |
| JMID2C        | 23081     | 16.7% | 13.6% | 20.9% | 17.0% |
| RP6-166C19.5  | 728072    | 27.4% | 14.9% | 8.9%  | 17.0% |
| SNX3          | 8724      | 23.6% | 9.3%  | 18.2% | 17.1% |
| ARTS-1        | 51752     | 27.5% | 9.9%  | 13.7% | 17.1% |
| LOC147991     | 147991    | 11.2% | 9.5%  | 30.5% | 17.1% |
| GPR135        | 64582     | 18.0% | 18.0% | 15.1% | 17.1% |
| ATP7A         | 538       | 29.3% | 6.1%  | 15.7% | 17.1% |
| HCA112        | 55365     | 13.6% | 10.0% | 27.6% | 17.1% |
| NDUF85        | 4711      | 21.7% | 17.3% | 12.2% | 17.1% |
| FBXL17        | 64839     | 26.0% | 9.3%  | 15.9% | 17.1% |
| C18ORF43      | 10650     | 17.9% | 14.9% | 18.4% | 17.1% |
| PSMC4         | 5704      | 24.6% | 10.9% | 15.7% | 17.1% |
| LOC128954     | 128954    | 12.1% | 12.5% | 26.7% | 17.1% |
| KIAA0602      | 23241     | 18.5% | 6.2%  | 26.5% | 17.1% |
| DNAJC5B       | 85479     | 25.4% | 14.7% | 11.1% | 17.1% |
| E2F2          | 1870      | 33.9% | 8.4%  | 9.0%  | 17.1% |
| C14ORF46      | 91750     | 15.9% | 13.4% | 21.9% | 17.1% |
| DYRK3         | 8444      | 15.6% | 19.2% | 16.4% | 17.1% |
| IMPA1         | 3612      | 16.1% | 18.4% | 16.8% | 17.1% |
| HOOK2         | 29911     | 17.9% | 13.3% | 20.1% | 17.1% |
| DKFZP434H0115 | 83538     | 13.2% | 4.4%  | 33.6% | 17.1% |
| GPX4          | 2879      | 38.8% | 3.0%  | 9.4%  | 17.1% |
| C6ORF142      | 90523     | 26.2% | 17.4% | 7.6%  | 17.1% |
| DICER1        | 23405     | 13.4% | 5.4%  | 32.4% | 17.1% |
| FLJ16353      | 440077    | 8.8%  | 11.3% | 31.2% | 17.1% |
| TIAF1         | 9220      | 13.5% | 13.5% | 24.2% | 17.1% |
| GSTM3         | 2947      | 16.8% | 18.9% | 15.6% | 17.1% |
| NOG           | 9241      | 22.4% | 12.3% | 16.7% | 17.1% |
| DDB1          | 1642      | 25.2% | 14.3% | 11.9% | 17.1% |
| NBPF10        | 440673    | 18.9% | 9.5%  | 22.9% | 17.1% |
| RFNG          | 5986      | 14.9% | 13.5% | 22.9% | 17.1% |
| PDCC6         | 10016     | 26.3% | 9.1%  | 15.9% | 17.1% |
| TAS2R60       | 338398    | 25.4% | 13.9% | 12.1% | 17.1% |
| MARCH3        | 115123    | 18.3% | 17.4% | 15.6% | 17.1% |
| AD158         | 84230     | 19.0% | 6.1%  | 26.2% | 17.1% |
| LYG2          | 254773    | 30.7% | 6.3%  | 14.4% | 17.1% |
| SYT1          | 6857      | 27.1% | 9.4%  | 14.9% | 17.1% |
| LOC221711     | 221711    | 20.2% | 7.6%  | 23.6% | 17.1% |
| SLC13A3       | 64849     | 21.6% | 13.8% | 16.0% | 17.1% |
| DNC1          | 1780      | 18.7% | 13.4% | 19.3% | 17.1% |
| PRM2          | 5620      | 13.0% | 13.3% | 25.0% | 17.1% |
| C10ORF90      | 118611    | 19.1% | 20.8% | 11.5% | 17.1% |
| IFRG28        | 64108     | 4.3%  | 25.9% | 21.2% | 17.1% |
| BCL2L1        | 598       | 26.6% | 12.5% | 12.3% | 17.1% |
| MAGEC3        | 139081    | 14.0% | 19.2% | 18.2% | 17.1% |
| APC           | 324       | 17.7% | 19.9% | 13.8% | 17.1% |
| CCL3L1        | 6349      | 21.1% | 13.3% | 17.0% | 17.1% |



|               |        |       |       |       |       |
|---------------|--------|-------|-------|-------|-------|
| MGC5576       | 79022  | 19.6% | 12.7% | 19.1% | 17.1% |
| PHPT1         | 29085  | 16.8% | 18.6% | 16.0% | 17.1% |
| LOC728215     | 728215 | 18.1% | 14.2% | 19.1% | 17.1% |
| HSPH1         | 10808  | 30.0% | 8.9%  | 12.5% | 17.1% |
| MGC50853      | 399665 | 6.5%  | 12.5% | 32.5% | 17.2% |
| HBE1          | 3046   | 22.7% | 16.6% | 12.2% | 17.2% |
| SMARCD2       | 6603   | 8.7%  | 24.3% | 18.5% | 17.2% |
| HAPLN3        | 145864 | 18.1% | 12.6% | 20.7% | 17.2% |
| RNF175        | 285533 | 20.2% | 16.7% | 14.6% | 17.2% |
| ACAD9         | 28976  | 19.8% | 12.4% | 19.3% | 17.2% |
| SYNCOILIN     | 81493  | 18.0% | 9.0%  | 24.5% | 17.2% |
| LSM4          | 25804  | 17.4% | 9.1%  | 25.0% | 17.2% |
| GPR151        | 134391 | 18.6% | 10.3% | 22.6% | 17.2% |
| ELF2          | 1998   | 18.1% | 16.7% | 16.7% | 17.2% |
| HLA-F         | 3134   | 13.7% | 21.4% | 16.4% | 17.2% |
| LOXL4         | 84171  | 31.5% | 5.0%  | 15.0% | 17.2% |
| F2R           | 2149   | 22.1% | 11.1% | 18.4% | 17.2% |
| RPN1          | 6184   | 21.4% | 8.7%  | 21.4% | 17.2% |
| GPR84         | 53831  | 16.4% | 16.3% | 18.9% | 17.2% |
| M96           | 22823  | 22.9% | 11.2% | 17.4% | 17.2% |
| SERPINA1      | 5265   | 23.8% | 12.5% | 15.3% | 17.2% |
| COP55         | 10987  | 21.3% | 11.4% | 18.9% | 17.2% |
| TAC3          | 6866   | 27.6% | 8.0%  | 16.0% | 17.2% |
| LARS          | 51520  | 33.6% | 5.7%  | 12.3% | 17.2% |
| LRRFIP2       | 9209   | 16.9% | 21.1% | 13.6% | 17.2% |
| KIAA1271      | 57506  | 20.0% | 11.3% | 20.3% | 17.2% |
| SEPHS2        | 22928  | 15.6% | 16.7% | 19.3% | 17.2% |
| TRIO          | 7204   | 19.6% | 14.3% | 17.7% | 17.2% |
| RALY          | 22913  | 20.7% | 21.2% | 9.8%  | 17.2% |
| FANCE         | 2178   | 29.1% | 7.2%  | 15.3% | 17.2% |
| DKFZP564I0422 | 83591  | 16.0% | 7.9%  | 27.7% | 17.2% |
| OR4E2         | 26686  | 21.6% | 16.4% | 13.7% | 17.2% |
| FMNL3         | 91010  | 29.1% | 9.6%  | 12.8% | 17.2% |
| SDSL          | 113675 | 28.1% | 7.2%  | 16.3% | 17.2% |
| PCQAP         | 51586  | 19.3% | 14.4% | 17.9% | 17.2% |
| OR52D1        | 390066 | 3.7%  | 26.4% | 21.6% | 17.2% |
| HRPT2         | 79577  | 15.2% | 9.7%  | 26.7% | 17.2% |
| SLC24A2       | 25769  | 18.7% | 11.9% | 21.0% | 17.2% |
| PD2           | 54623  | 10.2% | 8.4%  | 33.1% | 17.2% |
| LBX1          | 10660  | 28.3% | 7.9%  | 15.5% | 17.2% |
| EDG6          | 8698   | 19.4% | 12.5% | 19.7% | 17.2% |
| PTPRN         | 5798   | 21.5% | 19.1% | 11.1% | 17.2% |
| MGC11134      | 83707  | 17.2% | 15.0% | 19.5% | 17.2% |
| WEE1          | 7465   | 26.7% | 0.0%  | 25.0% | 17.2% |
| INCENP        | 3619   | 8.3%  | 20.0% | 23.3% | 17.2% |
| ATAD3A        | 55210  | 8.3%  | 14.5% | 28.8% | 17.2% |
| PCDHB11       | 56125  | 22.7% | 10.8% | 18.2% | 17.2% |
| BIRC6         | 57448  | 20.5% | 7.9%  | 23.3% | 17.2% |
| SFR57         | 6432   | 14.9% | 28.5% | 8.3%  | 17.2% |
| NPL4          | 55666  | 19.1% | 13.1% | 19.4% | 17.2% |
| KCNE3         | 10008  | 28.5% | 8.2%  | 14.9% | 17.2% |
| CD37          | 951    | 17.7% | 9.8%  | 24.2% | 17.2% |
| IGSF4C        | 199731 | 10.1% | 9.4%  | 32.2% | 17.2% |
| FLJ21103      | 79607  | 10.4% | 13.7% | 27.6% | 17.2% |
| KHDRBS2       | 202559 | 16.3% | 14.7% | 20.7% | 17.2% |
| FLJ12750      | 79720  | 19.5% | 11.9% | 20.3% | 17.2% |
| FLJ13089      | 80018  | 19.7% | 10.7% | 21.3% | 17.2% |
| NTSR1         | 4923   | 16.3% | 18.0% | 17.4% | 17.2% |
| RBM25         | 58517  | 14.7% | 14.5% | 22.5% | 17.2% |
| XCR1          | 2829   | 20.3% | 15.0% | 16.5% | 17.2% |
| ATP51         | 521    | 18.0% | 16.3% | 17.5% | 17.3% |
| AQP10         | 89872  | 42.9% | 4.4%  | 4.5%  | 17.3% |
| CHEK1         | 1111   | 11.8% | 15.0% | 25.0% | 17.3% |
| RHOF          | 54509  | 29.8% | 6.4%  | 15.6% | 17.3% |
| FLJ20297      | 55627  | 15.6% | 11.4% | 24.7% | 17.3% |
| LOC124446     | 124446 | 17.0% | 13.7% | 21.1% | 17.3% |
| OR6C2         | 341416 | 10.8% | 10.2% | 30.8% | 17.3% |
| SALL3         | 27164  | 22.2% | 5.9%  | 23.7% | 17.3% |
| NIPBL         | 25836  | 21.4% | 13.5% | 16.8% | 17.3% |
| FLJ14525      | 84886  | 15.9% | 13.0% | 22.9% | 17.3% |
| TDE2L         | 347735 | 22.5% | 11.8% | 17.5% | 17.3% |
| FLJ25680      | 134187 | 26.2% | 14.4% | 11.2% | 17.3% |
| 384D8-2       | 29781  | 17.4% | 12.6% | 21.8% | 17.3% |
| MT1X          | 4501   | 10.0% | 16.6% | 25.2% | 17.3% |
| GFRA1         | 2674   | 10.5% | 22.7% | 18.6% | 17.3% |
| EHF           | 26298  | 18.8% | 14.7% | 18.3% | 17.3% |
| FLJ25323      | 374470 | 19.7% | 5.8%  | 26.2% | 17.3% |
| CXCL11        | 6373   | 28.9% | 7.9%  | 15.1% | 17.3% |
| ATP2B3        | 492    | 25.6% | 8.9%  | 17.3% | 17.3% |
| PRB3          | 5544   | 19.3% | 18.8% | 13.8% | 17.3% |
| WINS1         | 55180  | 12.8% | 7.9%  | 31.2% | 17.3% |
| PKDREJ        | 10343  | 30.5% | 9.2%  | 12.1% | 17.3% |
| TRAF4         | 9618   | 26.2% | 13.5% | 12.2% | 17.3% |
| ECHDC3        | 79746  | 19.7% | 15.0% | 17.2% | 17.3% |
| ERCC2         | 2068   | 27.9% | 6.3%  | 17.7% | 17.3% |
| SIX1          | 6495   | 17.9% | 13.0% | 21.0% | 17.3% |
| NISCH         | 11188  | 25.0% | 10.2% | 16.7% | 17.3% |
| CHD1L         | 9557   | 18.8% | 23.4% | 9.8%  | 17.3% |
| JRF6          | 3664   | 15.4% | 17.2% | 19.3% | 17.3% |
| SMC1L1        | 8243   | 15.1% | 21.4% | 15.4% | 17.3% |
| AP4S1         | 11154  | 17.9% | 25.2% | 8.8%  | 17.3% |
| EDF1          | 8721   | 30.1% | 12.8% | 9.0%  | 17.3% |
| NTNG1         | 22854  | 13.8% | 17.9% | 20.3% | 17.3% |
| NDUF58        | 4728   | 31.8% | 7.8%  | 12.3% | 17.3% |
| SMARCC1       | 6599   | 21.0% | 10.5% | 20.5% | 17.3% |
| MATN1         | 4146   | 14.0% | 17.0% | 20.9% | 17.3% |
| MGC71999      | 342538 | 10.2% | 14.9% | 26.8% | 17.3% |
| LOC51249      | 51249  | 18.1% | 4.8%  | 29.0% | 17.3% |

|           |        |       |       |       |       |
|-----------|--------|-------|-------|-------|-------|
| SLC22A5   | 6584   | 11.8% | 18.8% | 21.4% | 17.3% |
| KCN11     | 3758   | 20.5% | 16.6% | 14.9% | 17.3% |
| FGF4      | 2249   | 16.8% | 13.6% | 21.5% | 17.3% |
| LOC120824 | 120824 | 21.2% | 10.3% | 20.5% | 17.3% |
| AF5Q31    | 27125  | 18.1% | 14.2% | 19.7% | 17.3% |
| MAP2K7    | 5609   | 16.4% | 15.7% | 19.9% | 17.3% |
| RRAGA     | 10670  | 27.5% | 8.0%  | 16.5% | 17.3% |
| GPR42     | 2866   | 15.7% | 21.6% | 14.7% | 17.3% |
| BANK1     | 55024  | 22.2% | 15.0% | 14.8% | 17.3% |
| STYK1     | 55359  | 6.2%  | 21.3% | 24.5% | 17.3% |
| SLC35E1   | 79939  | 28.8% | 10.2% | 13.0% | 17.3% |
| TGFA      | 7039   | 25.7% | 7.5%  | 18.8% | 17.3% |
| DGCR14    | 8220   | 14.6% | 17.0% | 20.4% | 17.3% |
| LAMR1     | 3921   | 16.7% | 21.1% | 14.3% | 17.3% |
| MS4A3     | 932    | 13.6% | 14.3% | 24.1% | 17.3% |
| ZNF155    | 7711   | 19.5% | 18.4% | 14.2% | 17.3% |
| HTR5A     | 3361   | 18.9% | 19.3% | 13.8% | 17.3% |
| ANG       | 283    | 21.4% | 13.8% | 16.8% | 17.3% |
| KIAA0256  | 9728   | 25.0% | 14.8% | 12.2% | 17.4% |
| LOC388389 | 388389 | 13.3% | 13.4% | 25.4% | 17.4% |
| MRPL28    | 10573  | 7.9%  | 21.1% | 23.1% | 17.4% |
| SPRED2    | 200734 | 13.8% | 14.3% | 24.1% | 17.4% |
| CA6       | 765    | 20.0% | 10.8% | 21.3% | 17.4% |
| GNAL      | 2774   | 21.2% | 10.9% | 20.0% | 17.4% |
| SNX11     | 29916  | 23.6% | 10.3% | 18.2% | 17.4% |
| SPP1      | 6696   | 7.9%  | 18.8% | 25.4% | 17.4% |
| ST8SIAG   | 338596 | 18.6% | 9.8%  | 23.8% | 17.4% |
| APOL4     | 80832  | 19.8% | 17.0% | 15.4% | 17.4% |
| PBEF1     | 10135  | 30.3% | 8.9%  | 12.9% | 17.4% |
| FLJ43860  | 389690 | 20.7% | 14.0% | 17.5% | 17.4% |
| OCM       | 4951   | 24.5% | 16.2% | 11.4% | 17.4% |
| MDFI      | 4188   | 20.7% | 18.5% | 12.9% | 17.4% |
| DUSP18    | 150290 | 19.9% | 23.3% | 8.9%  | 17.4% |
| FLJ31052  | 127943 | 16.4% | 9.7%  | 26.1% | 17.4% |
| NDE1      | 54820  | 11.2% | 21.2% | 19.7% | 17.4% |
| FLJ20449  | 54937  | 19.3% | 9.8%  | 23.1% | 17.4% |
| SLC6A16   | 28968  | 12.8% | 19.8% | 19.6% | 17.4% |
| MDS032    | 55850  | 19.1% | 9.0%  | 24.1% | 17.4% |
| AFTIPHLIN | 54812  | 11.7% | 19.6% | 20.9% | 17.4% |
| KCNK5     | 8645   | 22.7% | 7.3%  | 22.3% | 17.4% |
| NOL5A     | 10528  | 22.0% | 9.4%  | 20.8% | 17.4% |
| SMPDL3B   | 27293  | 28.0% | 8.1%  | 16.1% | 17.4% |
| MYH13     | 8735   | 22.3% | 12.8% | 17.1% | 17.4% |
| GJA5      | 2702   | 22.3% | 18.5% | 11.4% | 17.4% |
| FLJ10099  | 55069  | 9.0%  | 9.9%  | 33.3% | 17.4% |
| MGC3234   | 66005  | 14.6% | 15.6% | 22.0% | 17.4% |
| CRYZ      | 1429   | 11.0% | 17.1% | 24.2% | 17.4% |
| LOC155100 | 155100 | 19.3% | 17.7% | 15.2% | 17.4% |
| CHKA      | 1119   | 15.4% | 20.6% | 16.2% | 17.4% |
| CLECSF2   | 9976   | 16.3% | 14.5% | 21.5% | 17.4% |
| OR2S2     | 56656  | 19.1% | 21.8% | 11.4% | 17.4% |
| CNKSR2    | 22866  | 19.2% | 18.2% | 14.9% | 17.4% |
| C10RF24   | 116496 | 12.1% | 8.2%  | 32.1% | 17.4% |
| FLJ25070  | 55599  | 11.2% | 13.5% | 27.6% | 17.4% |
| RNF126    | 55658  | 22.4% | 12.9% | 17.0% | 17.4% |
| OR1F1     | 4992   | 30.8% | 12.9% | 8.6%  | 17.4% |
| SFRP5     | 6425   | 22.3% | 10.4% | 19.7% | 17.4% |
| ILF3      | 3609   | 21.7% | 17.2% | 13.4% | 17.4% |
| AQP5      | 362    | 21.2% | 9.2%  | 21.9% | 17.4% |
| MGC45871  | 359845 | 16.3% | 8.4%  | 27.7% | 17.4% |
| FAM31C    | 79958  | 18.2% | 10.8% | 23.4% | 17.5% |
| LOC124512 | 124512 | 24.2% | 14.6% | 13.6% | 17.5% |
| GPR73L1   | 128674 | 19.3% | 15.0% | 18.1% | 17.5% |
| ITGB1BP3  | 27231  | 31.1% | 6.0%  | 15.2% | 17.5% |
| TBXA2R    | 6915   | 21.8% | 13.5% | 17.1% | 17.5% |
| BACH      | 11332  | 6.7%  | 19.9% | 25.7% | 17.5% |
| DLGAP1    | 9229   | 29.8% | 11.5% | 11.1% | 17.5% |
| CAV3      | 859    | 17.4% | 15.7% | 19.2% | 17.5% |
| UAP1      | 6675   | 21.7% | 0.0%  | 30.7% | 17.5% |
| HPS4      | 89781  | 21.2% | 8.9%  | 22.3% | 17.5% |
| ADHFE1    | 137872 | 30.0% | 14.7% | 7.7%  | 17.5% |
| MRPS12    | 6183   | 14.3% | 15.7% | 22.5% | 17.5% |
| CCL14     | 6358   | 18.8% | 11.4% | 22.2% | 17.5% |
| KIAA0556  | 23247  | 17.2% | 13.2% | 22.1% | 17.5% |
| FAM20B    | 9917   | 27.0% | 15.5% | 10.0% | 17.5% |
| LOC90557  | 90557  | 17.3% | 4.9%  | 30.3% | 17.5% |
| UMPK      | 7371   | 20.3% | 13.2% | 19.0% | 17.5% |
| PLD3      | 23646  | 13.0% | 20.0% | 19.5% | 17.5% |
| ELSPBP1   | 64100  | 9.5%  | 26.5% | 16.5% | 17.5% |
| C10ORF71  | 118461 | 21.9% | 10.0% | 20.6% | 17.5% |
| STAT4     | 6775   | 26.1% | 6.4%  | 20.0% | 17.5% |
| KIR3DP1   | 768329 | 12.4% | 15.7% | 24.5% | 17.5% |
| FLJ22662  | 79887  | 19.7% | 8.1%  | 24.7% | 17.5% |
| DDO       | 8528   | 19.7% | 16.4% | 16.5% | 17.5% |
| PITX3     | 5309   | 19.1% | 19.0% | 14.5% | 17.5% |
| PRAME     | 23532  | 22.3% | 18.1% | 12.2% | 17.5% |
| LOC392979 | 392979 | 14.5% | 5.7%  | 32.4% | 17.5% |
| DNMT3L    | 29947  | 20.1% | 8.0%  | 24.5% | 17.5% |
| NPY2R     | 4887   | 17.4% | 15.2% | 20.0% | 17.5% |
| CYP2C18   | 1562   | 24.7% | 9.5%  | 18.3% | 17.5% |
| ZNF137    | 7696   | 20.4% | 14.2% | 18.0% | 17.5% |
| FLJ38822  | 388646 | 11.1% | 14.8% | 26.7% | 17.5% |
| C10ORF87  | 118663 | 17.7% | 9.3%  | 25.6% | 17.5% |
| LOC51326  | 51326  | 4.8%  | 18.4% | 29.4% | 17.5% |
| UNC13C    | 440279 | 8.0%  | 13.2% | 31.4% | 17.5% |
| GALNT8    | 26290  | 21.4% | 11.2% | 20.0% | 17.5% |
| LOC391123 | 391123 | 17.4% | 13.3% | 21.9% | 17.5% |
| RND1      | 27289  | 22.0% | 18.9% | 11.7% | 17.5% |

|           |        |       |       |       |       |
|-----------|--------|-------|-------|-------|-------|
| LOC115098 | 115098 | 14.7% | 15.0% | 22.9% | 17.5% |
| TOP3B     | 8940   | 23.1% | 12.4% | 17.0% | 17.5% |
| PCYOX1    | 51449  | 18.7% | 13.7% | 20.2% | 17.5% |
| DIO1      | 1733   | 30.6% | 11.3% | 10.7% | 17.5% |
| FLJ11036  | 55287  | 13.8% | 14.6% | 24.3% | 17.5% |
| ASB15     | 142685 | 22.4% | 11.5% | 18.7% | 17.5% |
| LZT51     | 11178  | 10.3% | 12.1% | 30.2% | 17.5% |
| PXMP3     | 5828   | 16.0% | 14.1% | 22.5% | 17.5% |
| LLT1      | 29121  | 16.1% | 12.2% | 24.3% | 17.5% |
| CGI-14    | 51005  | 28.0% | 10.6% | 14.0% | 17.5% |
| HBD       | 3045   | 22.0% | 17.0% | 13.6% | 17.5% |
| LOC283687 | 283687 | 7.2%  | 8.5%  | 37.0% | 17.5% |
| WWP2      | 11060  | 15.1% | 13.6% | 24.0% | 17.5% |
| FOLR1     | 2348   | 16.9% | 18.5% | 17.3% | 17.5% |
| EPHB3     | 2049   | 15.7% | 23.2% | 13.7% | 17.5% |
| P2RXL1    | 9127   | 20.4% | 11.7% | 20.6% | 17.5% |
| SDR-O     | 121214 | 20.0% | 13.0% | 19.6% | 17.5% |
| MRPL23    | 6150   | 17.4% | 12.4% | 22.8% | 17.6% |
| CPN2      | 1370   | 20.3% | 18.1% | 14.3% | 17.6% |
| KPNB3     | 3843   | 26.0% | 14.3% | 12.3% | 17.6% |
| WDR12     | 55759  | 36.5% | 0.0%  | 16.2% | 17.6% |
| STARD10   | 10809  | 21.0% | 23.3% | 8.4%  | 17.6% |
| PRO0971   | 55435  | 16.0% | 20.0% | 16.7% | 17.6% |
| TNFRSF7   | 939    | 21.3% | 19.4% | 11.9% | 17.6% |
| RTP2      | 344892 | 26.4% | 10.5% | 15.8% | 17.6% |
| FXR2      | 9513   | 22.7% | 20.5% | 9.5%  | 17.6% |
| LZTR1     | 8216   | 31.0% | 4.0%  | 17.6% | 17.6% |
| ARNTL2    | 56938  | 22.7% | 13.0% | 17.0% | 17.6% |
| MGC10992  | 92922  | 12.8% | 23.3% | 16.7% | 17.6% |
| KIAA1128  | 54462  | 25.3% | 9.4%  | 18.0% | 17.6% |
| PUM1      | 9698   | 23.6% | 15.9% | 13.2% | 17.6% |
| ABCD4     | 5826   | 22.7% | 13.4% | 16.6% | 17.6% |
| LOC340527 | 340527 | 20.9% | 7.0%  | 24.8% | 17.6% |
| THRAP1    | 9969   | 21.6% | 13.7% | 17.4% | 17.6% |
| POU3F1    | 5453   | 25.5% | 16.4% | 10.8% | 17.6% |
| TKTL1     | 8277   | 23.5% | 7.6%  | 21.6% | 17.6% |
| CEACAM4   | 1089   | 26.5% | 9.3%  | 17.0% | 17.6% |
| NUP43     | 348995 | 5.9%  | 23.3% | 23.5% | 17.6% |
| FTSJ2     | 29960  | 13.9% | 18.6% | 20.2% | 17.6% |
| BCAS4     | 55653  | 16.3% | 18.9% | 17.6% | 17.6% |
| MGC17299  | 128218 | 20.4% | 10.3% | 22.0% | 17.6% |
| CDH15     | 1013   | 23.1% | 8.7%  | 21.0% | 17.6% |
| FLJ22746  | 79843  | 9.9%  | 15.9% | 27.0% | 17.6% |
| AOX1      | 316    | 29.5% | 11.9% | 11.4% | 17.6% |
| MGC45840  | 283229 | 21.6% | 12.8% | 18.4% | 17.6% |
| LMO7      | 4008   | 23.0% | 10.8% | 19.1% | 17.6% |
| TFDP2     | 7029   | 19.7% | 17.5% | 15.6% | 17.6% |
| GPR155    | 151556 | 24.0% | 9.5%  | 19.3% | 17.6% |
| WDR34     | 89891  | 15.3% | 20.0% | 17.5% | 17.6% |
| IGFBP4    | 3487   | 16.1% | 18.0% | 18.7% | 17.6% |
| MGC10646  | 84779  | 11.9% | 19.4% | 21.5% | 17.6% |
| GABRQ     | 55879  | 23.7% | 14.8% | 14.3% | 17.6% |
| PECAM1    | 5175   | 21.0% | 19.9% | 11.9% | 17.6% |
| RGS2      | 5997   | 15.2% | 18.2% | 19.5% | 17.6% |
| CGI-69    | 51629  | 19.4% | 8.6%  | 24.8% | 17.6% |
| SESN3     | 143686 | 11.5% | 21.8% | 19.5% | 17.6% |
| SYNPO     | 11346  | 14.8% | 22.4% | 15.6% | 17.6% |
| MOXD1     | 26002  | 15.9% | 13.4% | 23.5% | 17.6% |
| UTX       | 7403   | 0.0%  | 42.9% | 10.0% | 17.6% |
| DDX3Y     | 8653   | 33.9% | 5.3%  | 13.7% | 17.6% |
| KCND3     | 3752   | 25.2% | 10.8% | 16.8% | 17.6% |
| FBXL7     | 23194  | 23.9% | 13.0% | 16.0% | 17.6% |
| OR3A4     | 390756 | 29.2% | 11.1% | 12.6% | 17.6% |
| C20ORF135 | 140701 | 21.6% | 21.7% | 9.6%  | 17.6% |
| SNX22     | 79856  | 11.5% | 14.7% | 26.6% | 17.6% |
| OR2T29    | 343563 | 25.7% | 20.0% | 7.1%  | 17.6% |
| NAALADL2  | 254827 | 28.0% | 16.5% | 8.4%  | 17.6% |
| GRP       | 2922   | 10.5% | 22.2% | 20.1% | 17.6% |
| FLJ21159  | 79884  | 19.6% | 4.6%  | 28.7% | 17.6% |
| LOC389384 | 389384 | 9.7%  | 11.9% | 31.3% | 17.6% |
| ARHGAP6   | 395    | 28.4% | 12.3% | 12.1% | 17.6% |
| OTX1      | 5013   | 24.6% | 16.2% | 12.1% | 17.6% |
| KIAA1393  | 57570  | 20.5% | 9.2%  | 23.1% | 17.6% |
| NUP88     | 4927   | 16.3% | 14.3% | 22.3% | 17.6% |
| STS       | 412    | 33.3% | 8.6%  | 11.0% | 17.6% |
| PRSS21    | 10942  | 21.8% | 14.5% | 16.6% | 17.6% |
| FLJ20580  | 54987  | 15.7% | 13.3% | 23.9% | 17.6% |
| FLJ10665  | 55200  | 10.0% | 26.2% | 16.7% | 17.6% |
| CLPX      | 10845  | 16.9% | 22.4% | 13.7% | 17.6% |
| EBF       | 1879   | 18.1% | 7.4%  | 27.4% | 17.7% |
| SLC25A20  | 788    | 13.8% | 16.6% | 22.5% | 17.7% |
| LEF1      | 51176  | 16.8% | 23.8% | 12.4% | 17.7% |
| VPS11     | 55823  | 9.8%  | 21.5% | 21.7% | 17.7% |
| RARRES1   | 5918   | 30.0% | 14.3% | 8.7%  | 17.7% |
| GMEB2     | 26205  | 22.0% | 20.6% | 10.4% | 17.7% |
| MGC13017  | 91368  | 22.8% | 18.7% | 11.5% | 17.7% |
| BYSL      | 705    | 18.2% | 13.7% | 21.2% | 17.7% |
| LOC401494 | 401494 | 14.6% | 9.0%  | 29.5% | 17.7% |
| FAM19A1   | 407738 | 22.1% | 10.9% | 20.0% | 17.7% |
| OR51M1    | 390059 | 34.1% | 12.7% | 6.2%  | 17.7% |
| C11ORF31  | 280636 | 21.8% | 12.6% | 18.6% | 17.7% |
| TNFRSF12A | 51330  | 10.2% | 17.5% | 25.3% | 17.7% |
| PPP1R9B   | 84687  | 28.3% | 11.1% | 13.6% | 17.7% |
| GALT      | 2592   | 26.9% | 4.1%  | 22.0% | 17.7% |
| ABCD1     | 215    | 20.0% | 11.2% | 21.8% | 17.7% |
| ACACA     | 31     | 26.8% | 12.4% | 13.8% | 17.7% |
| FLJ14627  | 84900  | 22.5% | 11.8% | 18.7% | 17.7% |
| KCNH8     | 131096 | 18.2% | 14.6% | 20.3% | 17.7% |

|           |        |       |       |       |       |
|-----------|--------|-------|-------|-------|-------|
| SLC5A12   | 159963 | 18.0% | 12.4% | 22.7% | 17.7% |
| SYTL3     | 94120  | 19.0% | 17.5% | 16.5% | 17.7% |
| COMMD2    | 51122  | 16.7% | 15.1% | 21.4% | 17.7% |
| TCP10     | 6953   | 17.0% | 13.7% | 22.3% | 17.7% |
| SLA/LP    | 51091  | 18.5% | 10.5% | 24.1% | 17.7% |
| FLJ10439  | 54663  | 13.7% | 8.3%  | 31.0% | 17.7% |
| HTR6      | 3362   | 21.7% | 18.9% | 12.5% | 17.7% |
| MGC48986  | 161753 | 11.3% | 13.7% | 28.1% | 17.7% |
| PCBP2     | 5094   | 27.5% | 12.7% | 13.0% | 17.7% |
| LOC51244  | 51244  | 16.6% | 6.1%  | 30.4% | 17.7% |
| MGC33382  | 162681 | 8.1%  | 14.7% | 30.3% | 17.7% |
| MGC40222  | 221718 | 18.3% | 12.7% | 22.1% | 17.7% |
| C19ORF10  | 56005  | 20.3% | 14.6% | 18.3% | 17.7% |
| SERPINA6  | 866    | 18.8% | 10.4% | 24.0% | 17.7% |
| STK19     | 8859   | 18.1% | 23.0% | 12.1% | 17.7% |
| ZNF483    | 158399 | 17.2% | 14.5% | 21.5% | 17.7% |
| MYO1G     | 64005  | 24.3% | 15.9% | 13.0% | 17.7% |
| LOC130502 | 130502 | 9.8%  | 10.4% | 32.9% | 17.7% |
| NUDT9     | 53343  | 23.1% | 18.2% | 11.9% | 17.7% |
| MGC24665  | 116028 | 18.2% | 11.0% | 24.0% | 17.7% |
| LRRC27    | 80313  | 17.6% | 12.3% | 23.2% | 17.7% |
| LOC90379  | 90379  | 28.2% | 12.0% | 13.0% | 17.7% |
| MDM4      | 4194   | 24.0% | 9.0%  | 20.2% | 17.7% |
| TXNL5     | 84817  | 23.6% | 14.0% | 15.6% | 17.7% |
| OR2T3     | 343173 | 21.1% | 19.8% | 12.4% | 17.7% |
| SLC16A5   | 9121   | 15.8% | 16.3% | 21.1% | 17.7% |
| TMEM103   | 54859  | 16.5% | 19.7% | 17.1% | 17.7% |
| GRIA2     | 2891   | 24.3% | 11.9% | 17.1% | 17.7% |
| LOC55924  | 55924  | 33.6% | 9.5%  | 10.1% | 17.7% |
| MGC17791  | 126282 | 15.5% | 13.8% | 24.0% | 17.8% |
| AVP1      | 60370  | 11.5% | 15.1% | 26.6% | 17.8% |
| SRISNF2L  | 23132  | 16.1% | 20.2% | 17.0% | 17.8% |
| TNFRSF5   | 958    | 17.1% | 20.7% | 15.5% | 17.8% |
| RTKN      | 6242   | 0.0%  | 24.7% | 28.6% | 17.8% |
| SIPA1     | 6494   | 18.3% | 10.6% | 24.4% | 17.8% |
| TFEC      | 22797  | 20.1% | 9.1%  | 24.0% | 17.8% |
| HRH3      | 11255  | 14.8% | 19.7% | 18.8% | 17.8% |
| BRF2      | 55290  | 21.4% | 13.0% | 18.9% | 17.8% |
| TNFSF7    | 970    | 22.5% | 9.4%  | 21.3% | 17.8% |
| NXP3      | 11248  | 20.0% | 14.8% | 18.5% | 17.8% |
| ACTN1     | 87     | 23.0% | 16.2% | 14.1% | 17.8% |
| ORZD3     | 120775 | 17.1% | 17.8% | 18.4% | 17.8% |
| MDAC1     | 147744 | 27.7% | 13.1% | 12.5% | 17.8% |
| LOC645037 | 645037 | 19.0% | 18.5% | 15.8% | 17.8% |
| RALGPS2   | 55103  | 24.6% | 15.9% | 12.8% | 17.8% |
| MCMDC1    | 254394 | 13.7% | 18.5% | 21.1% | 17.8% |
| NPM1      | 4869   | 17.9% | 15.0% | 20.4% | 17.8% |
| TAZ       | 6901   | 21.3% | 4.8%  | 27.3% | 17.8% |
| CAPN5     | 726    | 20.0% | 11.0% | 22.3% | 17.8% |
| FLJ22833  | 64859  | 16.6% | 19.4% | 17.3% | 17.8% |
| SLCO2B1   | 11309  | 10.6% | 26.4% | 16.3% | 17.8% |
| LOC388595 | 388595 | 20.1% | 11.3% | 22.0% | 17.8% |
| TIMM44    | 10469  | 33.3% | 2.8%  | 17.2% | 17.8% |
| LOC284402 | 284402 | 11.5% | 20.3% | 21.5% | 17.8% |
| GPR82     | 27197  | 13.6% | 19.1% | 20.6% | 17.8% |
| GZMM      | 3004   | 15.6% | 26.9% | 10.9% | 17.8% |
| GLP2R     | 9340   | 16.5% | 16.5% | 20.3% | 17.8% |
| FZD1      | 8321   | 14.5% | 15.7% | 23.1% | 17.8% |
| SNF1LK    | 150094 | 15.7% | 17.8% | 19.8% | 17.8% |
| COL22A1   | 169044 | 14.5% | 15.1% | 23.8% | 17.8% |
| RYR2      | 6262   | 26.6% | 3.4%  | 23.4% | 17.8% |
| NQO2      | 4835   | 18.3% | 13.8% | 21.3% | 17.8% |
| RAP2A     | 5911   | 23.2% | 11.5% | 18.8% | 17.8% |
| UBE3A     | 7337   | 23.9% | 7.9%  | 21.5% | 17.8% |
| LOC374395 | 374395 | 29.6% | 9.7%  | 14.0% | 17.8% |
| UBOX5     | 22888  | 18.2% | 19.4% | 15.8% | 17.8% |
| REST      | 5978   | 19.0% | 12.6% | 21.7% | 17.8% |
| MYBBP1A   | 10514  | 18.1% | 21.0% | 14.3% | 17.8% |
| COTL1     | 23406  | 16.8% | 21.9% | 14.7% | 17.8% |
| SMC2L1    | 10592  | 20.3% | 12.1% | 21.0% | 17.8% |
| SELV      | 348303 | 16.6% | 20.2% | 16.7% | 17.8% |
| ATG4D     | 84971  | 27.1% | 16.4% | 10.0% | 17.8% |
| C1ORF25   | 81627  | 24.2% | 13.8% | 15.4% | 17.8% |
| PSMF1     | 9491   | 17.2% | 20.4% | 15.9% | 17.8% |
| TRPM3     | 80036  | 20.8% | 7.3%  | 25.4% | 17.8% |
| LOC283677 | 283677 | 13.3% | 5.3%  | 34.9% | 17.8% |
| PLAA      | 9373   | 25.9% | 10.8% | 16.9% | 17.8% |
| ZNF621    | 285268 | 17.3% | 14.6% | 21.6% | 17.8% |
| LONRF3    | 79836  | 16.9% | 17.5% | 19.1% | 17.8% |
| GPR162    | 27239  | 14.9% | 22.5% | 16.1% | 17.8% |
| FLJ33318  | 162461 | 10.8% | 18.0% | 24.8% | 17.8% |
| QARS      | 5859   | 15.0% | 25.3% | 13.2% | 17.8% |
| KIAA1361  | 57551  | 20.4% | 17.9% | 15.2% | 17.8% |
| LOC644890 | 644890 | 21.1% | 10.0% | 22.4% | 17.8% |
| EXTL2     | 2135   | 34.1% | 5.9%  | 13.5% | 17.8% |
| C18ORF10  | 25941  | 18.1% | 13.3% | 22.2% | 17.8% |
| TITF1     | 7080   | 24.7% | 16.6% | 12.3% | 17.8% |
| SLC25A26  | 115286 | 4.1%  | 23.6% | 25.9% | 17.8% |
| DLX2      | 1746   | 28.8% | 8.7%  | 16.0% | 17.9% |
| PPP2R2A   | 5520   | 26.1% | 18.0% | 9.4%  | 17.9% |
| AGTPBP1   | 23287  | 19.9% | 15.0% | 18.6% | 17.9% |
| ZNF513    | 130557 | 24.4% | 17.6% | 11.6% | 17.9% |
| KLHL2     | 11275  | 4.3%  | 18.9% | 30.3% | 17.9% |
| XPMC2H    | 57109  | 23.4% | 15.5% | 14.7% | 17.9% |
| C13ORF9   | 51028  | 14.6% | 18.6% | 20.3% | 17.9% |
| FUK       | 197258 | 14.7% | 21.1% | 17.8% | 17.9% |
| SNAI2     | 6591   | 22.4% | 7.0%  | 24.2% | 17.9% |
| BMPR1A    | 657    | 8.1%  | 20.5% | 25.0% | 17.9% |

|               |        |       |       |       |       |
|---------------|--------|-------|-------|-------|-------|
| LRP4          | 4038   | 25.4% | 15.3% | 12.9% | 17.9% |
| NOLA2         | 55651  | 17.7% | 14.6% | 21.3% | 17.9% |
| MGC26988      | 153745 | 7.3%  | 14.5% | 31.8% | 17.9% |
| ITGA4         | 3676   | 30.1% | 7.0%  | 16.5% | 17.9% |
| SIRT6         | 51548  | 15.3% | 22.5% | 15.7% | 17.9% |
| RP6-166C19.10 | 728036 | 23.7% | 4.4%  | 25.4% | 17.9% |
| LRG1          | 116844 | 14.1% | 20.5% | 19.0% | 17.9% |
| SFXN1         | 94081  | 17.5% | 17.2% | 18.9% | 17.9% |
| CKM           | 1158   | 18.3% | 19.4% | 16.0% | 17.9% |
| C1QR1         | 22918  | 15.3% | 16.1% | 22.2% | 17.9% |
| LOC90835      | 90835  | 21.6% | 20.4% | 11.7% | 17.9% |
| MTUS1         | 57509  | 17.8% | 10.4% | 25.4% | 17.9% |
| DOC-1R        | 10263  | 10.8% | 11.7% | 31.1% | 17.9% |
| HSBP1         | 3281   | 16.0% | 13.7% | 24.0% | 17.9% |
| LOC389541     | 389541 | 9.7%  | 18.5% | 25.5% | 17.9% |
| RAB1A         | 5861   | 17.9% | 19.7% | 16.1% | 17.9% |
| EPS8L1        | 54869  | 16.6% | 20.1% | 17.0% | 17.9% |
| HOXC10        | 3226   | 21.8% | 10.5% | 21.3% | 17.9% |
| FLJ34443      | 285464 | 19.2% | 7.4%  | 27.1% | 17.9% |
| NELL1         | 4745   | 12.2% | 7.9%  | 33.5% | 17.9% |
| PRKAA2        | 5563   | 17.2% | 14.3% | 22.2% | 17.9% |
| MOX2          | 4345   | 13.1% | 14.7% | 25.8% | 17.9% |
| SH3BP2        | 6452   | 11.8% | 27.7% | 14.3% | 17.9% |
| SOC53         | 9021   | 18.4% | 13.8% | 21.5% | 17.9% |
| FLJ25143      | 130813 | 12.8% | 16.8% | 24.1% | 17.9% |
| KCTD15        | 79047  | 12.7% | 17.3% | 23.7% | 17.9% |
| LIG1          | 3978   | 29.7% | 10.7% | 13.3% | 17.9% |
| RP6-166C19.6  | 728062 | 22.7% | 12.5% | 18.5% | 17.9% |
| ADCY3         | 109    | 22.4% | 12.6% | 18.7% | 17.9% |
| C10ORF13      | 143282 | 26.2% | 2.8%  | 24.8% | 17.9% |
| MGC33692      | 414918 | 14.1% | 10.6% | 29.1% | 17.9% |
| TOR3A         | 64222  | 17.3% | 15.3% | 21.2% | 17.9% |
| LOC90353      | 90353  | 13.2% | 11.0% | 29.6% | 17.9% |
| TUBG1         | 7283   | 19.6% | 15.5% | 18.8% | 17.9% |
| CKLFSF5       | 116173 | 14.6% | 10.6% | 28.6% | 17.9% |
| ASCL3         | 56676  | 18.6% | 19.7% | 15.5% | 17.9% |
| LOC146909     | 146909 | 6.1%  | 19.7% | 27.9% | 17.9% |
| TCF4          | 6925   | 12.6% | 16.5% | 24.7% | 17.9% |
| UBE1C         | 9039   | 27.4% | 8.8%  | 17.6% | 17.9% |
| SEMA4F        | 10505  | 19.8% | 16.4% | 17.7% | 17.9% |
| FLJ32859      | 152405 | 19.5% | 8.1%  | 26.2% | 17.9% |
| THRAP2        | 23389  | 31.1% | 10.8% | 11.9% | 17.9% |
| GDF15         | 9518   | 12.3% | 17.9% | 23.7% | 17.9% |
| OR52N2        | 390077 | 16.0% | 13.8% | 24.1% | 17.9% |
| HECTD3        | 79654  | 14.4% | 17.5% | 22.0% | 17.9% |
| C4.4A         | 27076  | 13.2% | 16.4% | 24.3% | 17.9% |
| ERV3          | 2086   | 12.6% | 20.3% | 21.0% | 18.0% |
| ELOVL3        | 83401  | 22.9% | 12.7% | 18.3% | 18.0% |
| DHR53         | 9249   | 21.0% | 8.4%  | 24.4% | 18.0% |
| HAL           | 3034   | 10.3% | 20.8% | 22.8% | 18.0% |
| KIAA2022      | 340533 | 8.0%  | 17.7% | 28.2% | 18.0% |
| APBA1         | 320    | 22.4% | 2.5%  | 28.9% | 18.0% |
| MAPK1         | 5594   | 16.9% | 17.2% | 19.8% | 18.0% |
| RENBP         | 5973   | 43.2% | 10.7% | 0.0%  | 18.0% |
| SCN3B         | 55800  | 24.5% | 10.2% | 19.2% | 18.0% |
| LOC388581     | 388581 | 1.9%  | 32.7% | 19.3% | 18.0% |
| SCUBE3        | 222663 | 10.3% | 22.5% | 21.1% | 18.0% |
| PDCD1LG2      | 80380  | 12.7% | 9.2%  | 32.0% | 18.0% |
| RNF7          | 9616   | 26.0% | 17.2% | 10.8% | 18.0% |
| DPF2          | 5977   | 20.4% | 16.6% | 16.9% | 18.0% |
| SLC24A4       | 123041 | 31.5% | 7.4%  | 15.0% | 18.0% |
| NCOA3         | 8202   | 18.1% | 20.6% | 15.3% | 18.0% |
| TRPM8         | 79054  | 20.3% | 8.4%  | 25.2% | 18.0% |
| BTN1A1        | 696    | 15.4% | 13.5% | 25.0% | 18.0% |
| NR4A3         | 8013   | 15.3% | 22.3% | 16.3% | 18.0% |
| IGSF8         | 93185  | 21.7% | 19.4% | 12.9% | 18.0% |
| C20ORF85      | 128602 | 21.3% | 14.7% | 17.9% | 18.0% |
| NR1H4         | 9971   | 23.2% | 14.1% | 16.7% | 18.0% |
| FLJ23447      | 79883  | 18.5% | 6.8%  | 28.7% | 18.0% |
| SAFB2         | 9667   | 28.5% | 11.2% | 14.3% | 18.0% |
| ADAM8         | 101    | 26.3% | 9.5%  | 18.2% | 18.0% |
| E2IG5         | 26355  | 20.5% | 10.3% | 23.2% | 18.0% |
| MGC3101       | 79007  | 14.6% | 13.5% | 25.9% | 18.0% |
| HERV-FRD      | 405754 | 16.7% | 21.5% | 15.8% | 18.0% |
| CUTL2         | 23316  | 20.4% | 9.7%  | 23.9% | 18.0% |
| LY6D          | 8581   | 22.6% | 14.9% | 16.5% | 18.0% |
| MIG-6         | 54206  | 16.2% | 18.9% | 18.9% | 18.0% |
| ALDH6A1       | 4329   | 17.9% | 9.6%  | 26.5% | 18.0% |
| KIAA0992      | 23022  | 12.0% | 12.6% | 29.4% | 18.0% |
| OR4S2         | 219431 | 25.7% | 16.5% | 11.9% | 18.0% |
| LOC392360     | 392360 | 24.7% | 9.2%  | 20.2% | 18.0% |
| DRE1          | 54800  | 16.8% | 8.3%  | 29.0% | 18.0% |
| DLD           | 1738   | 24.0% | 10.4% | 19.7% | 18.0% |
| LOC283337     | 283337 | 13.2% | 17.9% | 23.0% | 18.0% |
| CXXC1         | 30827  | 24.3% | 18.9% | 10.8% | 18.0% |
| PRKAG2        | 51422  | 15.5% | 21.2% | 17.4% | 18.0% |
| EOMES         | 8320   | 22.4% | 11.6% | 20.1% | 18.0% |
| NTSC2L1       | 221294 | 16.9% | 14.5% | 22.6% | 18.0% |
| FLJ25200      | 151651 | 21.7% | 5.7%  | 26.6% | 18.0% |
| STXBP5        | 134957 | 25.8% | 19.6% | 8.8%  | 18.0% |
| LOC387921     | 387921 | 17.7% | 22.6% | 13.8% | 18.0% |
| C10ORF82      | 143379 | 25.9% | 7.2%  | 21.1% | 18.0% |
| NALP11        | 204801 | 14.4% | 23.5% | 16.2% | 18.0% |
| CTAG1B        | 1485   | 21.9% | 13.8% | 18.5% | 18.0% |
| FLJ14054      | 79614  | 17.1% | 7.8%  | 29.3% | 18.0% |
| MGC13114      | 84326  | 17.1% | 14.2% | 22.8% | 18.0% |
| SLC16A3       | 9123   | 22.8% | 11.2% | 20.1% | 18.0% |
| FLJ39599      | 255027 | 8.8%  | 15.2% | 30.2% | 18.0% |

|             |        |       |       |       |       |
|-------------|--------|-------|-------|-------|-------|
| POLE3       | 54107  | 26.3% | 15.3% | 12.6% | 18.0% |
| KRT14       | 3861   | 0.0%  | 29.9% | 24.3% | 18.0% |
| bA16L21.2.1 | 548645 | 15.2% | 11.4% | 27.6% | 18.0% |
| PPAN-P2RY11 | 692312 | 8.8%  | 18.2% | 27.1% | 18.0% |
| ABCA5       | 23461  | 20.5% | 17.3% | 16.4% | 18.1% |
| HPR         | 3250   | 15.6% | 18.2% | 20.4% | 18.1% |
| ERN2        | 10595  | 19.2% | 17.5% | 17.4% | 18.1% |
| ZNF350      | 59348  | 11.5% | 15.1% | 27.5% | 18.1% |
| C17ORF32    | 147007 | 19.4% | 11.0% | 23.8% | 18.1% |
| MEIS3       | 56917  | 13.9% | 21.1% | 19.2% | 18.1% |
| CNOT6L      | 246175 | 18.5% | 24.2% | 11.5% | 18.1% |
| ACADVL      | 37     | 20.1% | 12.1% | 22.0% | 18.1% |
| ACP5        | 54     | 13.6% | 24.1% | 16.5% | 18.1% |
| CSNK1A1     | 1452   | 22.1% | 14.1% | 18.0% | 18.1% |
| BAD         | 572    | 10.7% | 21.3% | 22.3% | 18.1% |
| AURKA       | 6790   | 15.6% | 23.1% | 15.6% | 18.1% |
| TM7SF1      | 7107   | 27.1% | 12.8% | 14.3% | 18.1% |
| 8D6A        | 51293  | 17.9% | 13.0% | 23.3% | 18.1% |
| WFDC5       | 149708 | 12.1% | 27.3% | 14.9% | 18.1% |
| FLJ21144    | 64789  | 8.1%  | 23.0% | 23.2% | 18.1% |
| CATSPER4    | 378807 | 13.7% | 16.3% | 24.3% | 18.1% |
| PLDN        | 26258  | 25.0% | 14.3% | 14.9% | 18.1% |
| KIAA1143    | 57456  | 22.2% | 17.9% | 14.2% | 18.1% |
| APOB        | 338    | 20.1% | 17.4% | 16.7% | 18.1% |
| BCAP31      | 10134  | 27.9% | 12.6% | 13.7% | 18.1% |
| MEF2C       | 4208   | 13.2% | 24.9% | 16.1% | 18.1% |
| BHLHB4      | 128408 | 15.2% | 20.6% | 18.4% | 18.1% |
| SFRS15      | 57466  | 27.3% | 9.9%  | 17.0% | 18.1% |
| LOC51204    | 51204  | 18.0% | 8.2%  | 28.1% | 18.1% |
| PKD2        | 5164   | 11.5% | 13.5% | 29.2% | 18.1% |
| C1S         | 716    | 23.4% | 17.9% | 13.0% | 18.1% |
| GPR101      | 83550  | 20.5% | 17.1% | 16.7% | 18.1% |
| BOLA2       | 552900 | 19.4% | 11.9% | 23.0% | 18.1% |
| MGC8721     | 51669  | 21.5% | 8.7%  | 24.1% | 18.1% |
| M17S2       | 4077   | 8.3%  | 20.0% | 26.0% | 18.1% |
| COMT        | 1312   | 27.6% | 15.0% | 11.6% | 18.1% |
| KIAA1183    | 57469  | 22.7% | 18.2% | 13.4% | 18.1% |
| MGC14817    | 84298  | 24.5% | 12.1% | 17.7% | 18.1% |
| KIAA1202    | 57477  | 18.1% | 12.7% | 23.5% | 18.1% |
| PSAPL1      | 768239 | 15.3% | 11.1% | 27.9% | 18.1% |
| HAVCR2      | 84868  | 20.6% | 18.2% | 15.5% | 18.1% |
| UNQ8193     | 139322 | 20.3% | 11.3% | 22.7% | 18.1% |
| HES1        | 3280   | 24.2% | 14.2% | 16.0% | 18.1% |
| STK33       | 65975  | 15.1% | 22.2% | 17.1% | 18.1% |
| MRPL17      | 63875  | 19.1% | 19.5% | 15.7% | 18.1% |
| KIAA1446    | 57596  | 17.3% | 22.3% | 14.8% | 18.1% |
| TNFSF6      | 356    | 14.7% | 8.9%  | 30.7% | 18.1% |
| COL11A2     | 1302   | 10.0% | 14.3% | 30.1% | 18.1% |
| MPZL1       | 9019   | 20.0% | 10.5% | 23.8% | 18.1% |
| MGC33424    | 143888 | 20.1% | 16.9% | 17.4% | 18.1% |
| BCDO2       | 83875  | 21.1% | 15.0% | 18.2% | 18.1% |
| 7H3         | 85360  | 17.8% | 8.4%  | 28.1% | 18.1% |
| TEPP        | 374739 | 24.2% | 8.1%  | 22.0% | 18.1% |
| UBE2E1      | 7324   | 19.0% | 14.3% | 21.1% | 18.1% |
| FBP1        | 2203   | 20.2% | 25.0% | 9.2%  | 18.1% |
| LOC130576   | 130576 | 12.9% | 14.7% | 26.8% | 18.1% |
| GHSR        | 2693   | 25.9% | 6.4%  | 22.1% | 18.1% |
| LOC124220   | 124220 | 24.3% | 21.1% | 8.9%  | 18.1% |
| DIPA        | 11007  | 11.7% | 24.2% | 18.4% | 18.1% |
| HIPK4       | 147746 | 19.0% | 23.4% | 11.9% | 18.1% |
| CTNINBL1    | 56259  | 14.7% | 21.2% | 18.5% | 18.1% |
| NUDT1       | 4521   | 15.6% | 26.2% | 12.6% | 18.1% |
| LOC389421   | 389421 | 16.4% | 11.2% | 26.7% | 18.1% |
| HOXD11      | 3237   | 19.0% | 16.4% | 19.0% | 18.1% |
| CKLFSF6     | 54918  | 16.7% | 13.3% | 24.4% | 18.1% |
| G6PC3       | 92579  | 17.1% | 24.7% | 12.6% | 18.1% |
| RAB2B       | 84932  | 21.1% | 21.4% | 12.0% | 18.1% |
| MIXL1       | 83881  | 20.2% | 17.1% | 17.2% | 18.1% |
| C20ORF136   | 140700 | 18.5% | 17.4% | 18.5% | 18.1% |
| BMP4        | 652    | 24.8% | 12.3% | 17.3% | 18.1% |
| MGC20481    | 90416  | 12.0% | 23.8% | 18.7% | 18.1% |
| KIAA0924    | 22834  | 16.3% | 9.9%  | 28.3% | 18.1% |
| FLJ35808    | 284076 | 18.4% | 8.2%  | 27.8% | 18.1% |
| SLC27A1     | 376497 | 24.4% | 11.0% | 19.0% | 18.1% |
| VEGFB       | 7423   | 17.6% | 19.6% | 17.2% | 18.2% |
| CNAP1       | 9918   | 14.1% | 17.1% | 23.3% | 18.2% |
| PKD1        | 5163   | 19.1% | 23.7% | 11.7% | 18.2% |
| ZSCAN1      | 284312 | 13.8% | 23.6% | 17.1% | 18.2% |
| FETUB       | 26998  | 28.3% | 16.8% | 9.4%  | 18.2% |
| RSN         | 6249   | 15.7% | 15.5% | 23.3% | 18.2% |
| MGC20533    | 93323  | 16.5% | 12.4% | 25.6% | 18.2% |
| TMEM42      | 131616 | 15.4% | 13.7% | 25.4% | 18.2% |
| PKN3        | 29941  | 21.2% | 14.2% | 19.1% | 18.2% |
| SUCLA2      | 8803   | 33.8% | 10.6% | 10.1% | 18.2% |
| SPATA2      | 9825   | 30.2% | 3.6%  | 20.7% | 18.2% |
| SLC28A3     | 64078  | 22.3% | 16.6% | 15.6% | 18.2% |
| C18ORF26    | 284254 | 21.4% | 14.2% | 19.0% | 18.2% |
| F2RL3       | 9002   | 26.5% | 13.6% | 14.5% | 18.2% |
| GSTA1       | 2938   | 20.4% | 11.5% | 22.6% | 18.2% |
| MGC40157    | 125144 | 21.1% | 15.0% | 18.5% | 18.2% |
| FLJ36445    | 163183 | 14.8% | 8.7%  | 31.1% | 18.2% |
| BCMP11      | 155465 | 19.4% | 7.2%  | 27.9% | 18.2% |
| ARPCS       | 10092  | 19.8% | 12.6% | 22.2% | 18.2% |
| NES         | 10763  | 17.9% | 27.9% | 8.8%  | 18.2% |
| FLJ20013    | 54784  | 16.8% | 16.0% | 21.7% | 18.2% |
| PLAG1       | 5324   | 19.9% | 17.0% | 17.6% | 18.2% |
| MOS         | 4342   | 10.7% | 26.7% | 17.2% | 18.2% |
| MDS1        | 4197   | 28.7% | 10.0% | 16.0% | 18.2% |

|              |        |       |       |       |       |
|--------------|--------|-------|-------|-------|-------|
| JUN          | 3725   | 19.3% | 14.4% | 21.0% | 18.2% |
| FLJ11078     | 55295  | 27.8% | 8.2%  | 18.6% | 18.2% |
| TMEM27       | 57393  | 14.3% | 23.9% | 16.4% | 18.2% |
| TM45F18      | 116441 | 18.6% | 14.2% | 21.8% | 18.2% |
| ERK8         | 225689 | 16.7% | 18.4% | 19.6% | 18.2% |
| RAB25        | 57111  | 24.6% | 7.1%  | 22.9% | 18.2% |
| LOC149018    | 149018 | 20.0% | 0.0%  | 34.6% | 18.2% |
| UNC5D        | 137970 | 33.3% | 2.6%  | 18.7% | 18.2% |
| CSNK1G1      | 53944  | 23.2% | 19.2% | 12.2% | 18.2% |
| PCP4         | 5121   | 8.0%  | 28.4% | 18.2% | 18.2% |
| FLJ22761     | 80201  | 23.6% | 11.7% | 19.3% | 18.2% |
| MGC21518     | 147184 | 22.3% | 19.4% | 12.9% | 18.2% |
| NR2F2        | 7026   | 34.0% | 5.7%  | 15.0% | 18.2% |
| HOMER2       | 9455   | 16.8% | 19.6% | 18.3% | 18.2% |
| STIM1        | 6786   | 18.8% | 11.4% | 24.5% | 18.2% |
| MRPL42       | 28977  | 13.7% | 20.2% | 20.7% | 18.2% |
| KRTAP18-11   | 386678 | 15.8% | 15.5% | 23.4% | 18.2% |
| MGC61550     | 348110 | 28.6% | 4.4%  | 21.7% | 18.2% |
| TRIM48       | 79097  | 24.4% | 10.5% | 19.8% | 18.2% |
| ZNF324       | 25799  | 24.9% | 6.6%  | 23.2% | 18.2% |
| ZNF442       | 79973  | 6.7%  | 16.0% | 32.0% | 18.2% |
| LOC90522     | 90522  | 16.5% | 10.9% | 27.3% | 18.2% |
| PPYR1        | 5540   | 20.0% | 16.8% | 17.9% | 18.2% |
| LOC441376    | 441376 | 10.0% | 23.8% | 20.9% | 18.2% |
| C1QG         | 714    | 18.0% | 23.3% | 13.3% | 18.2% |
| LUZP6        | 767558 | 27.9% | 15.0% | 11.8% | 18.2% |
| DDX47        | 51202  | 17.9% | 19.0% | 17.8% | 18.2% |
| FLJ20557     | 55659  | 21.5% | 7.7%  | 25.4% | 18.2% |
| RECQL5       | 9400   | 20.8% | 10.8% | 23.2% | 18.2% |
| G3BP2        | 9908   | 13.8% | 23.6% | 17.3% | 18.2% |
| SV2A         | 9900   | 23.6% | 11.5% | 19.6% | 18.2% |
| FBXO27       | 126433 | 19.0% | 15.6% | 20.2% | 18.3% |
| OR6Q1        | 219952 | 17.4% | 18.6% | 18.8% | 18.3% |
| MARVELD2     | 153562 | 30.7% | 5.6%  | 18.5% | 18.3% |
| IGFBP6       | 3489   | 21.9% | 16.7% | 16.2% | 18.3% |
| OR5M9        | 390162 | 20.6% | 19.7% | 14.5% | 18.3% |
| MC2R         | 4158   | 24.8% | 13.0% | 16.9% | 18.3% |
| SLC29A3      | 55315  | 26.1% | 13.6% | 15.1% | 18.3% |
| FLJ10874     | 55248  | 18.2% | 5.9%  | 30.7% | 18.3% |
| TCP1         | 6950   | 27.5% | 9.4%  | 17.9% | 18.3% |
| UGT1A7       | 54577  | 31.5% | 16.1% | 7.2%  | 18.3% |
| FLJ35821     | 160419 | 20.8% | 10.4% | 23.5% | 18.3% |
| DDX5         | 1655   | 23.1% | 13.6% | 18.1% | 18.3% |
| SIN3A        | 25942  | 26.7% | 10.5% | 17.6% | 18.3% |
| FBXL16       | 146330 | 23.6% | 15.6% | 15.6% | 18.3% |
| SLC38A1      | 81539  | 37.0% | 5.1%  | 12.6% | 18.3% |
| MGC33948     | 160140 | 18.1% | 10.5% | 26.2% | 18.3% |
| FGF5         | 2250   | 19.3% | 12.1% | 23.4% | 18.3% |
| TNKS1BP1     | 85456  | 18.3% | 12.2% | 24.3% | 18.3% |
| ASB13        | 79754  | 19.6% | 14.3% | 20.9% | 18.3% |
| MGC40214     | 137682 | 15.4% | 10.2% | 29.1% | 18.3% |
| SHMT1        | 6470   | 21.2% | 11.6% | 22.0% | 18.3% |
| TSPO         | 706    | 27.7% | 9.8%  | 17.3% | 18.3% |
| SEC10L1      | 10640  | 15.6% | 11.8% | 27.5% | 18.3% |
| KCTD12       | 115207 | 21.0% | 15.3% | 18.5% | 18.3% |
| VN1R5        | 317705 | 17.2% | 16.3% | 21.4% | 18.3% |
| P101-PI3K    | 23533  | 18.1% | 24.6% | 12.2% | 18.3% |
| PRKX         | 5613   | 14.0% | 22.8% | 18.1% | 18.3% |
| NY-REN-41    | 91057  | 22.7% | 10.2% | 22.0% | 18.3% |
| ADNP         | 23394  | 25.8% | 14.9% | 14.2% | 18.3% |
| SMAD6        | 4091   | 21.6% | 19.7% | 13.6% | 18.3% |
| LOC255313    | 255313 | 13.3% | 11.7% | 29.9% | 18.3% |
| CCS          | 9973   | 31.2% | 9.8%  | 13.9% | 18.3% |
| GATM         | 2628   | 29.3% | 5.9%  | 19.6% | 18.3% |
| AMY2A        | 279    | 12.7% | 21.9% | 20.3% | 18.3% |
| DPM3         | 54344  | 20.0% | 15.2% | 19.7% | 18.3% |
| C6ORF167     | 253714 | 28.3% | 19.8% | 6.7%  | 18.3% |
| CACNG2       | 10369  | 34.4% | 4.9%  | 15.6% | 18.3% |
| SPPL2A       | 84888  | 25.5% | 10.2% | 19.2% | 18.3% |
| PGBD5        | 79605  | 29.6% | 9.1%  | 16.2% | 18.3% |
| KIAA0605     | 9719   | 15.8% | 17.9% | 21.2% | 18.3% |
| USP40        | 55230  | 13.7% | 21.0% | 20.2% | 18.3% |
| USP15        | 9958   | 23.3% | 13.2% | 18.4% | 18.3% |
| C7ORF34      | 135927 | 19.8% | 20.1% | 15.0% | 18.3% |
| STAB2        | 55576  | 22.8% | 21.0% | 11.1% | 18.3% |
| UBR1         | 197131 | 27.0% | 12.5% | 15.4% | 18.3% |
| SV2B         | 9899   | 16.6% | 24.0% | 14.4% | 18.3% |
| LOC646498    | 646498 | 14.3% | 15.8% | 24.9% | 18.3% |
| EVPL         | 2125   | 13.9% | 15.9% | 25.1% | 18.3% |
| SLC25A22     | 79751  | 26.5% | 16.1% | 12.3% | 18.3% |
| PTCH2        | 8643   | 16.5% | 14.4% | 24.0% | 18.3% |
| IMPDH2       | 3615   | 26.5% | 12.5% | 16.1% | 18.3% |
| MIA3         | 375056 | 27.0% | 18.7% | 9.3%  | 18.3% |
| LOC127665    | 127665 | 14.2% | 5.8%  | 35.0% | 18.3% |
| HSF4         | 3299   | 20.7% | 11.5% | 22.8% | 18.3% |
| CHRNA        | 1146   | 17.6% | 20.5% | 16.9% | 18.3% |
| ZNF265       | 9406   | 20.8% | 6.1%  | 28.1% | 18.3% |
| OR5W2        | 390148 | 19.6% | 18.5% | 17.0% | 18.3% |
| KIAA1797     | 54914  | 20.6% | 12.4% | 22.0% | 18.3% |
| PIGT         | 51604  | 18.4% | 13.4% | 23.2% | 18.3% |
| LOC653275    | 653275 | 13.1% | 16.9% | 25.0% | 18.3% |
| DKFZP564M182 | 26156  | 21.3% | 8.8%  | 24.9% | 18.3% |
| SMPD1        | 6609   | 8.3%  | 30.0% | 16.7% | 18.3% |
| MAGEC1       | 9947   | 24.2% | 13.2% | 17.6% | 18.3% |
| LOC115704    | 115704 | 15.0% | 11.0% | 29.0% | 18.3% |
| TAT          | 6898   | 33.1% | 4.0%  | 17.9% | 18.3% |
| LOC84518     | 84518  | 22.4% | 14.7% | 17.9% | 18.3% |
| ZNF626       | 199777 | 22.0% | 18.2% | 14.8% | 18.3% |

|               |        |       |       |       |       |
|---------------|--------|-------|-------|-------|-------|
| EAF1          | 85403  | 9.0%  | 20.0% | 26.0% | 18.3% |
| MYH10         | 4628   | 22.0% | 11.2% | 21.9% | 18.3% |
| LOC283232     | 283232 | 15.8% | 20.9% | 18.4% | 18.3% |
| FARSLA        | 2193   | 35.0% | 8.6%  | 11.4% | 18.3% |
| FBXO18        | 84893  | 31.5% | 14.2% | 9.4%  | 18.3% |
| TMEM18        | 129787 | 30.3% | 12.2% | 12.6% | 18.3% |
| NANOG         | 79923  | 13.5% | 22.8% | 18.8% | 18.3% |
| DKFZP434G072  | 84103  | 19.3% | 10.4% | 25.3% | 18.3% |
| RABGAP1       | 23637  | 18.0% | 18.4% | 18.6% | 18.4% |
| FLJ13052      | 65220  | 21.0% | 17.7% | 16.4% | 18.4% |
| NAT9          | 26151  | 29.2% | 10.5% | 15.4% | 18.4% |
| BECN1         | 8678   | 13.3% | 19.0% | 22.7% | 18.4% |
| CPO           | 130749 | 20.0% | 14.6% | 20.4% | 18.4% |
| FASTK         | 10922  | 25.2% | 16.0% | 13.8% | 18.4% |
| CYP2A6        | 1548   | 25.3% | 14.5% | 15.4% | 18.4% |
| PCNA          | 5111   | 28.9% | 18.3% | 7.9%  | 18.4% |
| CCND1         | 595    | 23.7% | 11.3% | 20.2% | 18.4% |
| CBFA2T1       | 862    | 23.7% | 11.4% | 20.0% | 18.4% |
| FLJ10706      | 55732  | 17.8% | 13.2% | 24.1% | 18.4% |
| NDUF57        | 374291 | 17.9% | 9.4%  | 27.9% | 18.4% |
| FHR-4         | 10877  | 18.2% | 7.7%  | 29.2% | 18.4% |
| MGCC3207      | 84245  | 27.6% | 14.2% | 13.4% | 18.4% |
| ITGA11        | 22801  | 10.5% | 21.2% | 23.4% | 18.4% |
| SYT14         | 255928 | 14.8% | 17.4% | 22.9% | 18.4% |
| CGI-150       | 51031  | 23.6% | 6.1%  | 25.4% | 18.4% |
| FLJ10661      | 55199  | 18.1% | 14.3% | 22.6% | 18.4% |
| CDH10         | 1008   | 10.8% | 22.2% | 22.1% | 18.4% |
| FLJ25179      | 144568 | 15.5% | 18.7% | 20.9% | 18.4% |
| PCYT1B        | 9468   | 23.3% | 12.2% | 19.6% | 18.4% |
| SIGLEC11      | 114132 | 17.0% | 21.4% | 16.8% | 18.4% |
| KIAA0644      | 9865   | 28.3% | 7.1%  | 19.7% | 18.4% |
| MAFK          | 7975   | 21.0% | 18.6% | 15.6% | 18.4% |
| CORO1A        | 11151  | 10.1% | 21.2% | 23.8% | 18.4% |
| ANXA1         | 301    | 26.1% | 14.2% | 14.8% | 18.4% |
| MUC16         | 94025  | 17.6% | 0.0%  | 37.5% | 18.4% |
| NUT           | 256646 | 27.8% | 15.8% | 11.5% | 18.4% |
| MEFV          | 4210   | 19.2% | 12.2% | 23.8% | 18.4% |
| FABP6         | 2172   | 15.0% | 16.9% | 23.3% | 18.4% |
| TXNRD2        | 10587  | 18.0% | 20.4% | 16.8% | 18.4% |
| LOC388284     | 388284 | 26.9% | 18.0% | 10.3% | 18.4% |
| EGR4          | 1961   | 20.6% | 19.7% | 14.8% | 18.4% |
| TREM1         | 54210  | 8.5%  | 28.5% | 18.2% | 18.4% |
| FLJ20200      | 54854  | 17.0% | 17.5% | 20.6% | 18.4% |
| MGC3329       | 79066  | 21.8% | 11.6% | 21.8% | 18.4% |
| HBG2          | 3048   | 32.3% | 7.9%  | 15.0% | 18.4% |
| P2RY1         | 5028   | 14.3% | 16.9% | 24.0% | 18.4% |
| PCDHB7        | 56129  | 19.1% | 17.0% | 19.1% | 18.4% |
| ILIRN         | 3557   | 18.7% | 17.7% | 18.8% | 18.4% |
| GRTF1         | 79774  | 17.6% | 20.2% | 17.5% | 18.4% |
| MGAT2         | 4247   | 33.6% | 5.4%  | 16.2% | 18.4% |
| FLJ35725      | 152992 | 21.7% | 11.2% | 22.3% | 18.4% |
| GIB1          | 2705   | 17.3% | 17.9% | 20.0% | 18.4% |
| SMARCD1       | 56916  | 25.0% | 11.6% | 18.6% | 18.4% |
| C7ORF27       | 221927 | 16.7% | 18.9% | 19.7% | 18.4% |
| TLX2          | 3196   | 25.8% | 11.1% | 18.4% | 18.4% |
| GRPR          | 2925   | 14.5% | 21.9% | 18.9% | 18.4% |
| THOC1         | 9984   | 20.4% | 12.1% | 22.8% | 18.4% |
| C20ORF54      | 113278 | 20.5% | 18.1% | 16.7% | 18.4% |
| FLJ10241      | 55101  | 25.4% | 11.6% | 18.3% | 18.4% |
| PTPN13        | 5783   | 19.0% | 18.1% | 18.2% | 18.4% |
| RNF135        | 84282  | 20.9% | 11.1% | 23.3% | 18.4% |
| NOD3          | 197358 | 15.7% | 10.1% | 29.5% | 18.4% |
| CAP1          | 10487  | 24.2% | 14.1% | 17.1% | 18.4% |
| DKFZP761L1518 | 115399 | 15.0% | 11.5% | 28.8% | 18.4% |
| LRPPRC        | 10128  | 18.6% | 18.5% | 18.3% | 18.4% |
| PDPK1         | 5170   | 16.4% | 18.9% | 20.1% | 18.5% |
| CPT2          | 1376   | 23.9% | 6.0%  | 25.4% | 18.5% |
| NPC1L1        | 29881  | 22.4% | 12.4% | 20.5% | 18.5% |
| SEC14L4       | 284904 | 28.1% | 13.2% | 14.0% | 18.5% |
| RP11-444E17.5 | 441151 | 21.7% | 13.9% | 19.7% | 18.5% |
| PCSK6         | 5046   | 18.7% | 19.4% | 17.3% | 18.5% |
| ANXA4         | 307    | 13.0% | 20.0% | 22.4% | 18.5% |
| ACBD7         | 414149 | 14.0% | 21.4% | 20.0% | 18.5% |
| LRRC3         | 81543  | 19.4% | 17.4% | 18.5% | 18.5% |
| DDX41         | 51428  | 28.8% | 15.8% | 10.8% | 18.5% |
| FLJ10307      | 55113  | 9.9%  | 13.0% | 32.5% | 18.5% |
| PACAP         | 51237  | 13.0% | 20.0% | 22.4% | 18.5% |
| ZNF206        | 84891  | 10.1% | 10.4% | 34.9% | 18.5% |
| BIRC3         | 330    | 23.3% | 11.9% | 20.2% | 18.5% |
| AFP           | 174    | 32.2% | 10.9% | 12.4% | 18.5% |
| LOC201895     | 201895 | 38.5% | 5.3%  | 11.7% | 18.5% |
| FLJ32786      | 136332 | 17.6% | 10.8% | 27.0% | 18.5% |
| IMP4          | 92856  | 27.3% | 12.2% | 16.0% | 18.5% |
| STX10         | 8677   | 6.5%  | 23.1% | 25.9% | 18.5% |
| FLJ37099      | 163259 | 23.9% | 8.2%  | 23.3% | 18.5% |
| APOD          | 347    | 19.4% | 18.1% | 18.0% | 18.5% |
| CHST1         | 8534   | 22.6% | 15.8% | 17.1% | 18.5% |
| LILRB3        | 11025  | 9.3%  | 17.2% | 29.0% | 18.5% |
| ADAM30        | 11085  | 28.1% | 17.0% | 10.4% | 18.5% |
| LOC129285     | 129285 | 17.7% | 6.2%  | 31.7% | 18.5% |
| HAVCR1        | 26762  | 17.8% | 19.4% | 18.2% | 18.5% |
| GAL3ST4       | 79690  | 12.8% | 25.5% | 17.2% | 18.5% |
| SIM1          | 6492   | 32.1% | 8.0%  | 15.4% | 18.5% |
| FLJ38508      | 160428 | 24.3% | 6.5%  | 24.7% | 18.5% |
| ZNF536        | 9745   | 8.6%  | 16.9% | 30.0% | 18.5% |
| EXOSC3        | 51010  | 23.9% | 18.8% | 12.8% | 18.5% |
| LOC338773     | 338773 | 12.9% | 13.4% | 29.2% | 18.5% |
| ZNF25         | 219749 | 16.5% | 19.9% | 19.1% | 18.5% |



|           |        |       |       |       |       |
|-----------|--------|-------|-------|-------|-------|
| SYT3      | 84258  | 18.4% | 21.7% | 15.5% | 18.5% |
| HMG1A1    | 3159   | 16.1% | 18.5% | 20.9% | 18.5% |
| GANAB     | 23193  | 28.8% | 11.7% | 15.1% | 18.5% |
| CTAGE1    | 64693  | 23.7% | 18.3% | 13.6% | 18.5% |
| SNX9      | 51429  | 27.5% | 12.2% | 15.8% | 18.5% |
| BCAR3     | 8412   | 27.2% | 18.3% | 10.1% | 18.5% |
| LOC340075 | 340075 | 2.9%  | 12.8% | 39.9% | 18.5% |
| MYT1      | 4661   | 25.9% | 15.7% | 14.0% | 18.5% |
| IL3       | 3562   | 13.5% | 25.2% | 16.9% | 18.5% |
| FLJ22056  | 64423  | 15.4% | 18.2% | 22.0% | 18.5% |
| PPP3CA    | 5530   | 15.5% | 21.2% | 18.9% | 18.5% |
| GLB1      | 2720   | 16.1% | 18.5% | 21.0% | 18.5% |
| DGAT2L4   | 158835 | 20.3% | 15.9% | 19.4% | 18.5% |
| NVL       | 4931   | 19.5% | 15.1% | 21.0% | 18.5% |
| MGC16044  | 91523  | 22.0% | 5.6%  | 28.1% | 18.5% |
| LOC90333  | 90333  | 7.3%  | 13.8% | 34.5% | 18.5% |
| CADPS2    | 93664  | 24.8% | 12.9% | 17.9% | 18.5% |
| MAPK3     | 5595   | 20.2% | 19.0% | 16.5% | 18.5% |
| BAZ1B     | 9031   | 20.9% | 16.8% | 17.9% | 18.5% |
| SNX15     | 29907  | 14.1% | 22.1% | 19.5% | 18.5% |
| MGC10772  | 80758  | 22.4% | 16.6% | 16.6% | 18.5% |
| FLJ11331  | 55345  | 13.6% | 16.7% | 25.4% | 18.5% |
| PLCB4     | 5332   | 16.0% | 20.8% | 18.9% | 18.5% |
| C20ORF26  | 26074  | 20.7% | 15.2% | 19.7% | 18.5% |
| SSNA1     | 8636   | 7.5%  | 23.7% | 24.5% | 18.5% |
| CCR12     | 9034   | 18.3% | 19.4% | 17.9% | 18.6% |
| EFNA2     | 1943   | 20.8% | 17.5% | 17.4% | 18.6% |
| C14ORF114 | 55218  | 20.0% | 0.0%  | 35.7% | 18.6% |
| GPR119    | 139760 | 27.7% | 18.0% | 10.0% | 18.6% |
| LOC167127 | 167127 | 22.8% | 16.7% | 16.2% | 18.6% |
| C5ORF12   | 256987 | 20.1% | 11.2% | 24.4% | 18.6% |
| FLJ20701  | 55022  | 22.8% | 17.4% | 15.5% | 18.6% |
| SMOC1     | 64093  | 25.6% | 11.5% | 18.6% | 18.6% |
| ATP2A1    | 487    | 18.8% | 14.7% | 22.1% | 18.6% |
| NAT8L     | 339983 | 19.2% | 14.3% | 22.2% | 18.6% |
| KIAA0773  | 9715   | 22.0% | 17.2% | 16.4% | 18.6% |
| LGALS8    | 3964   | 18.2% | 7.7%  | 29.8% | 18.6% |
| KIAA0133  | 9816   | 24.4% | 9.1%  | 22.2% | 18.6% |
| FLJ23476  | 79693  | 17.2% | 10.4% | 28.1% | 18.6% |
| FLJ11305  | 55795  | 15.9% | 10.2% | 29.6% | 18.6% |
| C5R1      | 728    | 20.6% | 14.5% | 20.6% | 18.6% |
| SGPP1     | 81537  | 15.0% | 20.8% | 19.9% | 18.6% |
| FLJ10260  | 55106  | 27.1% | 14.3% | 14.3% | 18.6% |
| DEFB103B  | 414325 | 25.8% | 12.3% | 17.6% | 18.6% |
| FLJ20481  | 54947  | 21.8% | 5.6%  | 28.3% | 18.6% |
| CX3CR1    | 1524   | 17.0% | 19.0% | 19.7% | 18.6% |
| CLYBL     | 171425 | 28.5% | 10.9% | 16.3% | 18.6% |
| FLJ21168  | 80143  | 15.2% | 13.8% | 26.7% | 18.6% |
| C20ORF111 | 51526  | 13.9% | 20.7% | 21.2% | 18.6% |
| POLI      | 11201  | 31.4% | 9.0%  | 15.4% | 18.6% |
| BCAR1     | 9564   | 21.3% | 15.3% | 19.1% | 18.6% |
| P2RY2     | 5029   | 22.5% | 9.2%  | 24.0% | 18.6% |
| SEC14L1   | 6397   | 35.5% | 10.5% | 9.8%  | 18.6% |
| C1GALT2   | 29071  | 13.4% | 14.9% | 27.4% | 18.6% |
| QKI       | 9444   | 18.6% | 16.3% | 20.8% | 18.6% |
| FLJ33207  | 339855 | 19.5% | 5.8%  | 30.4% | 18.6% |
| TGM4      | 7047   | 26.7% | 13.4% | 15.7% | 18.6% |
| C10ORF3   | 55165  | 14.4% | 8.0%  | 33.3% | 18.6% |
| HS3ST5    | 222537 | 22.2% | 9.4%  | 24.2% | 18.6% |
| IL1RL2    | 8808   | 20.5% | 16.4% | 18.8% | 18.6% |
| SFRS2     | 6427   | 26.2% | 7.9%  | 21.7% | 18.6% |
| MRPL32    | 64983  | 28.3% | 8.8%  | 18.6% | 18.6% |
| SEC22L1   | 9554   | 18.4% | 16.7% | 20.6% | 18.6% |
| OLFM1L2B  | 25903  | 14.4% | 21.7% | 19.7% | 18.6% |
| MBD2      | 8932   | 18.8% | 23.6% | 13.4% | 18.6% |
| C21ORF18  | 54093  | 16.8% | 22.2% | 16.8% | 18.6% |
| OLFM3     | 118427 | 12.8% | 15.5% | 27.5% | 18.6% |
| KIAA0467  | 23334  | 27.9% | 10.9% | 16.9% | 18.6% |
| ATP1B1    | 481    | 31.0% | 5.4%  | 19.4% | 18.6% |
| NIF3L1BP1 | 80145  | 22.2% | 14.4% | 19.2% | 18.6% |
| MARGPRE   | 116534 | 21.5% | 17.7% | 16.6% | 18.6% |
| CASKIN2   | 57513  | 24.6% | 9.3%  | 21.9% | 18.6% |
| LOC285527 | 285527 | 17.4% | 13.6% | 24.8% | 18.6% |
| STK22B    | 23617  | 15.6% | 20.0% | 20.2% | 18.6% |
| C20ORF149 | 79144  | 19.3% | 21.6% | 14.9% | 18.6% |
| FLJ12056  | 79998  | 10.6% | 21.9% | 23.3% | 18.6% |
| HIST1H2AD | 3013   | 19.9% | 11.2% | 24.8% | 18.6% |
| WFDC10A   | 140832 | 29.8% | 12.4% | 13.6% | 18.6% |
| GAS       | 2520   | 23.2% | 15.4% | 17.2% | 18.6% |
| EIF2S3    | 1968   | 26.3% | 11.7% | 17.9% | 18.6% |
| AKT1S1    | 84335  | 11.8% | 23.9% | 20.2% | 18.6% |
| PPP1R3D   | 5509   | 28.0% | 13.0% | 14.8% | 18.6% |
| ZXDA      | 7789   | 21.5% | 17.1% | 17.2% | 18.6% |
| KIAA1272  | 57186  | 13.8% | 8.2%  | 33.9% | 18.6% |
| CROT      | 54677  | 28.6% | 17.4% | 9.9%  | 18.6% |
| EBI2      | 1880   | 22.4% | 15.1% | 18.5% | 18.6% |
| KIAA1924  | 197335 | 20.1% | 17.8% | 18.0% | 18.6% |
| ARL6IP5   | 10550  | 17.6% | 29.5% | 8.8%  | 18.6% |
| IFRD2     | 7866   | 25.0% | 20.1% | 10.7% | 18.6% |
| HOXC12    | 3228   | 20.1% | 19.5% | 16.3% | 18.6% |
| OR10Q1    | 219960 | 20.0% | 12.2% | 23.7% | 18.6% |
| GTSE1     | 51512  | 20.9% | 13.6% | 21.4% | 18.6% |
| PRODH2    | 58510  | 25.1% | 14.5% | 16.3% | 18.6% |
| CCT6A     | 908    | 25.1% | 10.6% | 20.2% | 18.6% |
| LOC644168 | 644168 | 30.1% | 6.1%  | 19.7% | 18.6% |
| GPR78     | 27201  | 17.1% | 18.0% | 20.8% | 18.6% |
| KIAA1463  | 57609  | 9.6%  | 10.9% | 35.4% | 18.6% |
| DUSP5     | 1847   | 14.6% | 18.2% | 23.0% | 18.6% |

|              |           |       |       |       |       |
|--------------|-----------|-------|-------|-------|-------|
| KLF14        | 136259    | 15.4% | 13.4% | 27.1% | 18.6% |
| TAS2R1       | 259287    | 12.6% | 19.4% | 24.0% | 18.6% |
| PDCL3        | 79031     | 25.4% | 18.3% | 12.2% | 18.6% |
| ZNF548       | 147694    | 10.9% | 24.5% | 20.6% | 18.6% |
| STX17        | 55014     | 27.3% | 10.7% | 17.9% | 18.6% |
| GDF3         | 9573      | 23.1% | 14.0% | 18.8% | 18.6% |
| PRV1         | 57126     | 25.1% | 10.1% | 20.7% | 18.6% |
| PDCL2        | 132954    | 17.2% | 13.4% | 25.4% | 18.7% |
| ARHGFE12     | 23365     | 21.3% | 18.0% | 16.7% | 18.7% |
| CG88         | 94115     | 16.3% | 20.7% | 19.0% | 18.7% |
| LOC201191    | 201191    | 19.9% | 15.6% | 20.4% | 18.7% |
| KRTHB1       | 3887      | 23.2% | 20.0% | 12.8% | 18.7% |
| BRCC2        | 414899    | 11.7% | 24.1% | 20.2% | 18.7% |
| SEC14L2      | 23541     | 27.7% | 9.3%  | 19.0% | 18.7% |
| OPRD1        | 4985      | 23.1% | 12.6% | 20.3% | 18.7% |
| TACR2        | 6865      | 22.7% | 19.0% | 14.3% | 18.7% |
| ARHGDI       | 396       | 22.3% | 11.9% | 21.8% | 18.7% |
| PKD2L1       | 9033      | 27.1% | 8.4%  | 20.5% | 18.7% |
| HIST1H4F     | 8361      | 28.7% | 8.4%  | 18.9% | 18.7% |
| NKD2         | 85409     | 34.2% | 6.9%  | 14.9% | 18.7% |
| ZNF647       | 58500     | 17.6% | 6.5%  | 31.9% | 18.7% |
| WDR35        | 57539     | 20.7% | 19.4% | 15.9% | 18.7% |
| CSTF2T       | 23283     | 24.2% | 17.1% | 14.7% | 18.7% |
| S100A2       | 6273      | 17.1% | 24.8% | 14.1% | 18.7% |
| CRYZL1       | 9946      | 32.2% | 8.6%  | 15.2% | 18.7% |
| CASA         | 763       | 21.2% | 15.1% | 19.7% | 18.7% |
| PITPNB       | 23760     | 18.2% | 18.7% | 19.1% | 18.7% |
| LOC283726    | 283726    | 16.3% | 8.3%  | 31.4% | 18.7% |
| RPUSD2       | 27079     | 26.4% | 11.6% | 18.0% | 18.7% |
| MGC45416     | 132299    | 10.3% | 12.3% | 33.4% | 18.7% |
| SCA2         | 6311      | 19.5% | 12.5% | 24.0% | 18.7% |
| CDX2         | 1045      | 16.5% | 14.8% | 24.7% | 18.7% |
| SLC39A12     | 221074    | 22.4% | 16.8% | 16.9% | 18.7% |
| MGC15882     | 84970     | 12.6% | 12.4% | 31.1% | 18.7% |
| KIAA1001     | 22901     | 18.9% | 23.0% | 14.2% | 18.7% |
| C9ORF123     | 90871     | 21.0% | 12.5% | 22.5% | 18.7% |
| DUSP1        | 1843      | 22.9% | 16.5% | 16.7% | 18.7% |
| PREI3        | 25843     | 19.0% | 16.4% | 20.7% | 18.7% |
| PURB         | 5814      | 16.7% | 21.1% | 18.3% | 18.7% |
| ZCCHC11      | 23318     | 21.6% | 9.6%  | 24.8% | 18.7% |
| ZNF294       | 26046     | 16.3% | 18.1% | 21.7% | 18.7% |
| EPS8         | 2059      | 24.7% | 16.7% | 14.7% | 18.7% |
| GULP1        | 51454     | 21.6% | 12.3% | 22.3% | 18.7% |
| MAP4K4       | 9448      | 24.4% | 16.9% | 14.9% | 18.7% |
| DYNC1H1      | 1778      | 24.9% | 8.0%  | 23.2% | 18.7% |
| PGAM2        | 5224      | 15.3% | 21.7% | 19.1% | 18.7% |
| FLJ00133     | 25992     | 15.3% | 25.2% | 15.7% | 18.7% |
| C2ORF18      | 54978     | 15.4% | 17.1% | 23.5% | 18.7% |
| DDX18        | 8886      | 22.9% | 11.1% | 22.1% | 18.7% |
| FAM72A       | 653573    | 14.7% | 18.8% | 22.7% | 18.7% |
| CHST10       | 9486      | 24.5% | 14.4% | 17.2% | 18.7% |
| ZNF482       | 10773     | 16.0% | 17.8% | 22.3% | 18.7% |
| MGC39633     | 153733    | 17.7% | 14.6% | 23.8% | 18.7% |
| MGC45491     | 221416    | 13.2% | 15.0% | 28.0% | 18.7% |
| UQCRH        | 7388      | 24.0% | 8.6%  | 23.5% | 18.7% |
| BATF         | 10538     | 27.7% | 15.0% | 13.4% | 18.7% |
| FLJ25590     | 283416    | 20.5% | 20.2% | 15.5% | 18.7% |
| KCNQ2        | 3785      | 20.5% | 17.5% | 18.2% | 18.7% |
| CYP2A7       | 1549      | 25.6% | 11.8% | 18.8% | 18.7% |
| ZBTB42       | 100128927 | 14.2% | 13.4% | 28.6% | 18.7% |
| ARHGFE17     | 9828      | 23.0% | 18.9% | 14.4% | 18.7% |
| CRABP2       | 1382      | 23.5% | 8.4%  | 24.3% | 18.7% |
| NARS         | 4677      | 12.6% | 20.9% | 22.7% | 18.7% |
| SEEL         | 8796      | 23.7% | 8.4%  | 24.2% | 18.7% |
| RNF139       | 11236     | 25.3% | 8.0%  | 22.9% | 18.7% |
| GCKR         | 2646      | 20.3% | 14.7% | 21.1% | 18.7% |
| PADI3        | 51702     | 15.5% | 14.9% | 25.9% | 18.7% |
| MGC46496     | 285555    | 21.0% | 21.8% | 13.5% | 18.7% |
| ZFP64        | 55734     | 31.5% | 6.8%  | 17.9% | 18.7% |
| AYP1         | 84153     | 22.1% | 11.1% | 23.1% | 18.7% |
| THY1         | 7070      | 26.3% | 19.6% | 10.3% | 18.7% |
| LHX5         | 64211     | 25.0% | 0.0%  | 31.3% | 18.8% |
| ILKAP        | 80895     | 19.6% | 16.3% | 20.3% | 18.8% |
| PHF21B       | 112885    | 26.9% | 12.4% | 16.9% | 18.8% |
| HSPA2        | 3306      | 21.3% | 19.0% | 15.9% | 18.8% |
| CGN          | 57530     | 11.4% | 26.0% | 18.9% | 18.8% |
| KREMEN2      | 79412     | 28.5% | 6.0%  | 21.8% | 18.8% |
| CCL11        | 6356      | 17.9% | 23.0% | 15.4% | 18.8% |
| FCN3         | 8547      | 14.1% | 10.4% | 31.8% | 18.8% |
| RGS11        | 8786      | 19.1% | 22.6% | 14.6% | 18.8% |
| AOF1         | 221656    | 20.4% | 16.8% | 19.0% | 18.8% |
| MGC13045     | 84304     | 17.8% | 19.1% | 19.4% | 18.8% |
| CHRD         | 8646      | 23.5% | 15.0% | 17.7% | 18.8% |
| SAMSN1       | 64092     | 28.8% | 8.3%  | 19.1% | 18.8% |
| BAIAP2       | 10458     | 28.8% | 18.3% | 9.1%  | 18.8% |
| NADSYN1      | 55191     | 20.7% | 11.4% | 24.2% | 18.8% |
| RP6-166C19.9 | 728042    | 22.1% | 18.4% | 15.8% | 18.8% |
| PTGER3       | 5733      | 20.5% | 24.4% | 11.3% | 18.8% |
| WISP3        | 8838      | 31.8% | 7.5%  | 17.0% | 18.8% |
| FLJ46082     | 389799    | 21.0% | 17.2% | 18.2% | 18.8% |
| PTPRO        | 5800      | 24.6% | 20.8% | 10.9% | 18.8% |
| TMEM19       | 55266     | 22.2% | 9.1%  | 25.0% | 18.8% |
| OR4D6        | 219983    | 16.2% | 17.1% | 23.1% | 18.8% |
| MSX2         | 4488      | 26.2% | 15.3% | 14.8% | 18.8% |
| PTN          | 5764      | 20.4% | 15.9% | 20.0% | 18.8% |
| PRPF4B       | 8899      | 14.7% | 21.3% | 20.3% | 18.8% |
| CH25H        | 9023      | 11.8% | 17.2% | 27.3% | 18.8% |
| BRD1         | 23774     | 16.7% | 21.7% | 18.0% | 18.8% |

|           |        |       |       |       |       |
|-----------|--------|-------|-------|-------|-------|
| FLJ35728  | 164127 | 15.1% | 12.0% | 29.3% | 18.8% |
| CA8       | 767    | 21.9% | 10.2% | 24.3% | 18.8% |
| MYH9      | 4627   | 20.5% | 20.5% | 15.3% | 18.8% |
| MAST3     | 23031  | 22.3% | 14.0% | 20.0% | 18.8% |
| PRKCZ     | 5590   | 17.9% | 13.0% | 25.4% | 18.8% |
| KIAA0286  | 23306  | 36.4% | 20.0% | 0.0%  | 18.8% |
| C14ORF4   | 64207  | 32.6% | 10.2% | 13.6% | 18.8% |
| SLC29A4   | 222962 | 7.8%  | 29.8% | 18.7% | 18.8% |
| ATP2B4    | 493    | 33.2% | 10.9% | 12.3% | 18.8% |
| DDB2      | 1643   | 18.4% | 17.4% | 20.6% | 18.8% |
| CPT1C     | 126129 | 22.2% | 11.7% | 22.6% | 18.8% |
| EIF3K     | 27335  | 27.7% | 17.1% | 11.6% | 18.8% |
| LOC441061 | 441061 | 25.9% | 4.8%  | 25.7% | 18.8% |
| ADH4      | 127    | 19.3% | 21.9% | 15.2% | 18.8% |
| ACLY      | 47     | 30.3% | 9.6%  | 16.5% | 18.8% |
| PCDHGA5   | 56110  | 14.8% | 7.7%  | 33.9% | 18.8% |
| FTCD      | 10841  | 13.5% | 14.4% | 28.5% | 18.8% |
| RPS23     | 6228   | 16.8% | 16.3% | 23.3% | 18.8% |
| MGC33370  | 257044 | 15.0% | 15.1% | 26.3% | 18.8% |
| GAPDH     | 2597   | 22.1% | 13.2% | 21.2% | 18.8% |
| OR51G1    | 79324  | 24.8% | 12.4% | 19.2% | 18.8% |
| EHD1      | 10938  | 21.5% | 20.0% | 14.9% | 18.8% |
| PRNP      | 79033  | 11.2% | 20.3% | 24.9% | 18.8% |
| FLJ37300  | 124602 | 18.8% | 4.3%  | 33.3% | 18.8% |
| KCNK4     | 3749   | 23.8% | 6.5%  | 26.2% | 18.8% |
| FAM83G    | 644815 | 10.9% | 23.9% | 21.6% | 18.8% |
| CMIP      | 80790  | 22.9% | 14.6% | 18.9% | 18.8% |
| MUC17     | 140453 | 13.0% | 17.0% | 26.5% | 18.8% |
| KIAA1944  | 121256 | 17.2% | 13.9% | 25.4% | 18.8% |
| SPAG4     | 6676   | 27.3% | 19.1% | 10.1% | 18.8% |
| HS3ST2    | 9956   | 12.5% | 11.1% | 32.9% | 18.8% |
| NTN2L     | 4917   | 23.9% | 14.0% | 18.6% | 18.8% |
| PUM2      | 23369  | 16.6% | 22.5% | 17.5% | 18.8% |
| GLRX      | 2745   | 28.4% | 11.9% | 16.2% | 18.8% |
| SSX4B     | 548313 | 27.8% | 12.9% | 15.8% | 18.8% |
| VNN2      | 8875   | 16.7% | 17.5% | 22.3% | 18.8% |
| SLC6A20   | 54716  | 41.6% | 2.8%  | 12.2% | 18.8% |
| C19ORF21  | 126353 | 18.8% | 13.8% | 23.9% | 18.8% |
| CCK       | 885    | 21.9% | 16.0% | 18.6% | 18.8% |
| PXMMP2    | 5827   | 30.4% | 3.9%  | 22.3% | 18.8% |
| ZFH4      | 79776  | 17.0% | 5.2%  | 34.4% | 18.9% |
| PROSAP1P1 | 9762   | 19.8% | 16.5% | 20.2% | 18.9% |
| TERF2     | 7014   | 7.8%  | 15.6% | 33.1% | 18.9% |
| C10ORF57  | 80195  | 22.6% | 11.3% | 22.7% | 18.9% |
| PLK3      | 1263   | 16.6% | 25.8% | 14.2% | 18.9% |
| LCAT      | 3931   | 17.2% | 21.2% | 18.2% | 18.9% |
| GCNT7     | 140687 | 11.2% | 24.5% | 20.9% | 18.9% |
| LOC388407 | 388407 | 19.8% | 9.3%  | 27.5% | 18.9% |
| FTSJ3     | 117246 | 23.0% | 13.8% | 19.8% | 18.9% |
| MATN2     | 4147   | 25.8% | 9.1%  | 21.8% | 18.9% |
| LOC51337  | 51337  | 24.2% | 7.7%  | 24.7% | 18.9% |
| TA-NFKBH  | 84807  | 6.2%  | 21.9% | 28.6% | 18.9% |
| GNB2      | 2783   | 33.8% | 16.3% | 6.5%  | 18.9% |
| SELM      | 140606 | 27.2% | 18.9% | 10.5% | 18.9% |
| FLNC      | 2318   | 21.1% | 16.3% | 19.3% | 18.9% |
| KIAA1524  | 57650  | 18.6% | 21.2% | 16.9% | 18.9% |
| MRPS30    | 10884  | 17.7% | 17.5% | 21.5% | 18.9% |
| PADI6     | 353238 | 26.0% | 14.8% | 15.8% | 18.9% |
| CCNB2     | 9133   | 16.7% | 20.7% | 19.2% | 18.9% |
| MGC32104  | 147657 | 21.7% | 6.5%  | 28.4% | 18.9% |
| LOC51058  | 51058  | 17.5% | 12.5% | 26.7% | 18.9% |
| AK1       | 203    | 20.7% | 13.6% | 22.4% | 18.9% |
| FOS       | 2353   | 29.8% | 15.0% | 11.9% | 18.9% |
| PINK1     | 65018  | 20.8% | 17.4% | 18.5% | 18.9% |
| FLJ11457  | 79809  | 21.1% | 8.1%  | 27.4% | 18.9% |
| C20ORF40  | 149986 | 18.3% | 8.5%  | 29.9% | 18.9% |
| ITGB3     | 3690   | 39.4% | 4.9%  | 12.3% | 18.9% |
| GLDC      | 2731   | 21.2% | 13.5% | 22.0% | 18.9% |
| ETS1      | 2113   | 29.3% | 8.7%  | 18.7% | 18.9% |
| DNASE1L1  | 1774   | 20.6% | 22.0% | 14.1% | 18.9% |
| ANKRD9    | 122416 | 31.3% | 9.1%  | 16.3% | 18.9% |
| CD36      | 948    | 22.3% | 12.6% | 21.8% | 18.9% |
| FBXO2     | 26232  | 27.6% | 20.3% | 8.9%  | 18.9% |
| TOB2      | 10766  | 25.3% | 16.2% | 15.2% | 18.9% |
| NUCB1     | 4924   | 19.6% | 14.4% | 22.7% | 18.9% |
| GRB7      | 2886   | 20.0% | 17.9% | 18.8% | 18.9% |
| C10ORF70  | 55847  | 11.7% | 15.3% | 29.7% | 18.9% |
| LBX2      | 85474  | 21.4% | 15.8% | 19.5% | 18.9% |
| GDF10     | 2662   | 13.3% | 25.0% | 18.4% | 18.9% |
| KCNAB1    | 7881   | 27.8% | 15.2% | 13.7% | 18.9% |
| TMLHE     | 55217  | 16.7% | 27.2% | 12.8% | 18.9% |
| FLJ20397  | 54919  | 15.4% | 15.1% | 26.3% | 18.9% |
| FLJ34306  | 374819 | 17.4% | 13.1% | 26.3% | 18.9% |
| MFAP5     | 8076   | 20.9% | 18.7% | 17.2% | 18.9% |
| GDF11     | 10220  | 26.8% | 7.8%  | 22.2% | 18.9% |
| ABHD7     | 253152 | 23.1% | 14.7% | 19.0% | 18.9% |
| KIAA1856  | 84629  | 13.3% | 27.7% | 15.8% | 18.9% |
| LOC389549 | 389549 | 16.2% | 13.1% | 27.5% | 18.9% |
| SLMAP     | 7871   | 24.3% | 12.5% | 20.0% | 18.9% |
| PDZK8     | 118987 | 13.5% | 22.0% | 21.3% | 18.9% |
| SOS1      | 6654   | 18.7% | 21.7% | 16.5% | 18.9% |
| NDUFV2    | 4729   | 29.4% | 10.9% | 16.5% | 18.9% |
| FUT2      | 2524   | 20.7% | 13.6% | 22.6% | 18.9% |
| TUBGCP5   | 114791 | 21.3% | 16.3% | 19.3% | 18.9% |
| DMRT1     | 1761   | 22.8% | 17.8% | 16.3% | 18.9% |
| FLJ14888  | 84942  | 23.4% | 11.4% | 22.0% | 18.9% |
| RDH5      | 5959   | 36.1% | 5.5%  | 15.2% | 18.9% |
| GRM5      | 2915   | 20.1% | 18.5% | 18.2% | 18.9% |

|           |        |       |       |       |       |
|-----------|--------|-------|-------|-------|-------|
| ABTB1     | 80325  | 24.3% | 13.4% | 19.1% | 18.9% |
| ARG99     | 83857  | 22.5% | 11.4% | 22.9% | 18.9% |
| FGF1      | 2246   | 23.0% | 15.4% | 18.4% | 18.9% |
| MRPL15    | 29088  | 18.5% | 18.7% | 19.7% | 18.9% |
| PHF21A    | 51317  | 19.4% | 15.5% | 21.9% | 18.9% |
| TBC1D10   | 83874  | 13.8% | 14.5% | 28.6% | 18.9% |
| LOC389158 | 389158 | 18.7% | 15.9% | 22.3% | 18.9% |
| C20ORF59  | 63910  | 10.4% | 21.8% | 24.6% | 18.9% |
| PPID      | 5481   | 29.4% | 15.1% | 12.3% | 18.9% |
| KCNJ10    | 3766   | 26.4% | 12.8% | 17.6% | 19.0% |
| SERPIN1   | 5274   | 22.5% | 18.0% | 16.3% | 19.0% |
| CACNB3    | 784    | 24.8% | 6.8%  | 25.3% | 19.0% |
| SPRN      | 92170  | 11.7% | 11.0% | 34.2% | 19.0% |
| NMBR      | 4829   | 21.7% | 14.9% | 20.2% | 19.0% |
| FLJ32771  | 220004 | 26.3% | 14.6% | 16.0% | 19.0% |
| KIAA1344  | 57544  | 17.4% | 14.1% | 25.3% | 19.0% |
| PPP1R14B  | 26472  | 17.3% | 22.3% | 17.3% | 19.0% |
| NXF       | 266743 | 17.2% | 21.3% | 18.5% | 19.0% |
| SYNGAP1   | 8831   | 20.0% | 21.6% | 15.3% | 19.0% |
| CYP4F8    | 11283  | 14.1% | 12.4% | 30.4% | 19.0% |
| MGC23985  | 389336 | 24.3% | 19.2% | 13.4% | 19.0% |
| GSR       | 2936   | 12.2% | 24.1% | 20.6% | 19.0% |
| BLP2      | 80213  | 15.4% | 7.2%  | 34.4% | 19.0% |
| RASA1     | 5921   | 22.6% | 17.3% | 17.0% | 19.0% |
| EZH2      | 2146   | 20.6% | 15.8% | 20.5% | 19.0% |
| MTHFS     | 10588  | 28.6% | 16.1% | 12.3% | 19.0% |
| KCMF1     | 56888  | 26.7% | 13.3% | 16.9% | 19.0% |
| HRMT1L1   | 3275   | 16.1% | 8.1%  | 32.7% | 19.0% |
| FAM9A     | 171482 | 12.1% | 26.0% | 18.8% | 19.0% |
| SMARCA5   | 8467   | 26.3% | 14.8% | 15.8% | 19.0% |
| RBM24     | 221662 | 20.2% | 17.3% | 19.5% | 19.0% |
| FMN2      | 56776  | 20.0% | 10.7% | 26.3% | 19.0% |
| DXS9879E  | 8270   | 23.9% | 10.7% | 22.4% | 19.0% |
| NAPSA     | 9476   | 18.9% | 29.1% | 9.0%  | 19.0% |
| UPK1B     | 7348   | 19.6% | 19.1% | 18.2% | 19.0% |
| RECQL4    | 9401   | 15.3% | 22.4% | 19.3% | 19.0% |
| LOC389766 | 389766 | 23.8% | 14.8% | 18.4% | 19.0% |
| SKP2      | 6502   | 25.5% | 11.6% | 19.9% | 19.0% |
| FLJ31196  | 146802 | 14.9% | 7.0%  | 35.1% | 19.0% |
| MARK4     | 57787  | 17.5% | 18.2% | 21.3% | 19.0% |
| HCN4      | 10021  | 24.1% | 9.0%  | 24.0% | 19.0% |
| FLJ38596  | 644809 | 29.6% | 18.7% | 8.7%  | 19.0% |
| KLHL1     | 57626  | 13.5% | 16.3% | 27.3% | 19.0% |
| HSPA8     | 3312   | 17.1% | 9.4%  | 30.5% | 19.0% |
| LGALS12   | 85329  | 18.3% | 11.8% | 26.8% | 19.0% |
| HIST1H1D  | 3007   | 38.5% | 12.5% | 6.1%  | 19.0% |
| RGS1      | 5996   | 16.7% | 22.9% | 17.4% | 19.0% |
| C14ORF94  | 54930  | 23.7% | 7.9%  | 25.4% | 19.0% |
| CIC       | 23152  | 11.5% | 18.4% | 27.2% | 19.0% |
| SERPIN5   | 5268   | 18.4% | 9.2%  | 29.4% | 19.0% |
| TRIM29    | 23650  | 24.5% | 12.5% | 20.1% | 19.0% |
| ZNF83     | 55769  | 26.7% | 6.2%  | 24.1% | 19.0% |
| GMPPA     | 29926  | 20.8% | 18.6% | 17.7% | 19.0% |
| ID4       | 3400   | 33.5% | 13.5% | 10.1% | 19.0% |
| MAF       | 4094   | 26.4% | 17.7% | 13.0% | 19.0% |
| EIF357    | 8664   | 31.7% | 16.7% | 8.7%  | 19.0% |
| NURIT     | 220082 | 19.4% | 6.0%  | 31.7% | 19.0% |
| RNF168    | 165918 | 25.1% | 13.7% | 18.3% | 19.0% |
| HIST1H4C  | 8364   | 28.9% | 12.2% | 15.9% | 19.0% |
| MRP63     | 78988  | 27.4% | 4.7%  | 24.9% | 19.0% |
| OR11A1    | 26531  | 30.0% | 15.2% | 11.9% | 19.0% |
| MSH5      | 4439   | 25.0% | 16.9% | 15.2% | 19.0% |
| ATP1A1    | 476    | 25.5% | 23.2% | 8.4%  | 19.0% |
| OR4N2     | 390429 | 17.4% | 17.6% | 22.0% | 19.0% |
| MGC11061  | 84272  | 13.2% | 17.3% | 26.6% | 19.0% |
| FLJ32871  | 146279 | 9.8%  | 24.3% | 23.0% | 19.0% |
| PRKCB1    | 5579   | 15.8% | 28.7% | 12.7% | 19.0% |
| RBMX      | 27316  | 36.8% | 2.7%  | 17.6% | 19.0% |
| PPP2R4    | 5524   | 17.9% | 24.3% | 14.8% | 19.0% |
| SLC6A12   | 6539   | 35.2% | 6.3%  | 15.6% | 19.0% |
| MAGEA12   | 4111   | 21.8% | 18.9% | 16.4% | 19.0% |
| VHL       | 7428   | 21.7% | 16.9% | 18.5% | 19.0% |
| HTR1E     | 3354   | 19.2% | 17.4% | 20.5% | 19.0% |
| LOC93380  | 93380  | 20.0% | 17.3% | 19.8% | 19.0% |
| LOC283331 | 283331 | 10.7% | 22.7% | 23.7% | 19.0% |
| SOX13     | 9580   | 17.9% | 19.6% | 19.7% | 19.0% |
| CA12      | 771    | 21.0% | 21.9% | 14.2% | 19.0% |
| HOUA6     | 3203   | 22.7% | 17.2% | 17.2% | 19.0% |
| ALAS2     | 212    | 27.3% | 10.6% | 19.2% | 19.0% |
| C10ORF95  | 79946  | 20.0% | 14.9% | 22.2% | 19.0% |
| IPO11     | 51194  | 25.0% | 13.0% | 19.2% | 19.0% |
| FLJ35782  | 170062 | 22.3% | 11.4% | 23.5% | 19.1% |
| FLJ46354  | 374977 | 21.7% | 6.9%  | 28.5% | 19.1% |
| C18ORF37  | 125476 | 29.6% | 15.9% | 11.7% | 19.1% |
| C18ORF11  | 64762  | 17.5% | 17.9% | 21.8% | 19.1% |
| RFWD3     | 55159  | 27.9% | 10.0% | 19.3% | 19.1% |
| INHBC     | 3626   | 28.6% | 7.5%  | 21.1% | 19.1% |
| DUSP13    | 51207  | 21.3% | 21.8% | 14.1% | 19.1% |
| UNQ6122   | 388611 | 13.3% | 14.3% | 29.5% | 19.1% |
| AF1Q      | 10962  | 17.8% | 16.7% | 22.7% | 19.1% |
| LOC388394 | 388394 | 5.9%  | 23.5% | 27.8% | 19.1% |
| OR2M7     | 391196 | 18.2% | 19.1% | 19.9% | 19.1% |
| HIP1R     | 9026   | 25.3% | 20.3% | 11.7% | 19.1% |
| PRRX2     | 51450  | 25.3% | 15.3% | 16.7% | 19.1% |
| RC3       | 23312  | 12.5% | 20.5% | 24.2% | 19.1% |
| EGFL7     | 51162  | 19.3% | 21.4% | 16.5% | 19.1% |
| MGC4728   | 374928 | 18.6% | 13.2% | 25.4% | 19.1% |
| H2AFJ     | 55766  | 20.5% | 19.2% | 17.5% | 19.1% |

|              |           |       |       |       |       |
|--------------|-----------|-------|-------|-------|-------|
| ELLS1        | 222166    | 24.8% | 6.8%  | 25.6% | 19.1% |
| CPD          | 1362      | 24.6% | 13.0% | 19.6% | 19.1% |
| XAB1         | 11321     | 28.1% | 15.8% | 13.3% | 19.1% |
| DST          | 667       | 21.8% | 19.4% | 16.1% | 19.1% |
| B3GALT6      | 126792    | 24.6% | 12.6% | 20.1% | 19.1% |
| VEZATTN      | 55591     | 28.0% | 10.2% | 19.0% | 19.1% |
| NCF4         | 4689      | 25.2% | 13.3% | 18.7% | 19.1% |
| RNF32        | 140545    | 28.9% | 14.0% | 14.3% | 19.1% |
| GPR161       | 23432     | 18.9% | 23.9% | 14.5% | 19.1% |
| C14ORF54     | 161142    | 18.2% | 20.5% | 18.6% | 19.1% |
| RLN1         | 6013      | 21.0% | 10.4% | 25.8% | 19.1% |
| FLJ40343     | 284573    | 18.5% | 15.3% | 23.5% | 19.1% |
| FST          | 10468     | 24.7% | 12.3% | 20.3% | 19.1% |
| CYP4X1       | 260293    | 21.6% | 17.1% | 18.6% | 19.1% |
| C6ORF191     | 253582    | 22.1% | 19.2% | 15.9% | 19.1% |
| CDC91L1      | 128869    | 19.4% | 20.0% | 17.9% | 19.1% |
| HIST1H3J     | 8356      | 24.0% | 19.7% | 13.6% | 19.1% |
| GCC2         | 9648      | 22.1% | 20.4% | 14.7% | 19.1% |
| REPS2        | 9185      | 17.6% | 13.1% | 26.5% | 19.1% |
| ESR2         | 2100      | 10.2% | 29.8% | 17.2% | 19.1% |
| KIAA0802     | 23255     | 31.7% | 7.0%  | 18.6% | 19.1% |
| MAZ          | 4150      | 19.8% | 14.2% | 23.3% | 19.1% |
| C19ORF13     | 26065     | 14.3% | 18.2% | 24.8% | 19.1% |
| IL9R         | 3581      | 14.8% | 21.4% | 21.1% | 19.1% |
| LOC388962    | 388962    | 14.5% | 12.6% | 30.1% | 19.1% |
| MCART2       | 147407    | 21.4% | 18.3% | 17.5% | 19.1% |
| RAD52B       | 201299    | 15.5% | 13.4% | 28.4% | 19.1% |
| CRX          | 1406      | 13.7% | 24.2% | 19.4% | 19.1% |
| MDS031       | 55849     | 20.7% | 11.9% | 24.7% | 19.1% |
| OR56A1       | 120796    | 19.7% | 10.4% | 27.2% | 19.1% |
| GSS          | 2937      | 23.4% | 22.7% | 11.2% | 19.1% |
| VGCNL1       | 259232    | 19.7% | 16.7% | 20.9% | 19.1% |
| ASB16        | 92591     | 14.9% | 20.6% | 21.8% | 19.1% |
| GPR175       | 131601    | 20.0% | 12.6% | 24.7% | 19.1% |
| RAX          | 30062     | 26.6% | 15.4% | 15.3% | 19.1% |
| FAM47E       | 100129583 | 12.5% | 21.7% | 23.2% | 19.1% |
| ACADS        | 35        | 23.4% | 10.1% | 23.8% | 19.1% |
| C19ORF15     | 57828     | 27.2% | 15.7% | 14.4% | 19.1% |
| FLJ13220     | 60558     | 19.3% | 6.6%  | 31.5% | 19.1% |
| OR10H2       | 26538     | 20.8% | 12.5% | 24.0% | 19.1% |
| PLCB3        | 5331      | 22.9% | 12.2% | 22.3% | 19.1% |
| SMG1         | 23049     | 18.5% | 20.7% | 18.2% | 19.1% |
| FLJ21657     | 64417     | 17.3% | 9.7%  | 30.4% | 19.1% |
| DKFZP547H025 | 56918     | 28.9% | 13.8% | 14.6% | 19.1% |
| KCNH7        | 90134     | 26.0% | 11.0% | 20.4% | 19.1% |
| SAGE1        | 55511     | 30.6% | 19.9% | 6.9%  | 19.1% |
| GRK7         | 131890    | 15.7% | 17.3% | 24.4% | 19.1% |
| RKHD1        | 399664    | 22.0% | 12.0% | 23.4% | 19.1% |
| KNS2         | 3831      | 23.8% | 20.5% | 13.1% | 19.1% |
| RNASE4       | 6038      | 22.6% | 15.4% | 19.4% | 19.1% |
| NMNAT3       | 349565    | 34.5% | 5.6%  | 17.3% | 19.1% |
| C14ORF9      | 90809     | 15.6% | 13.2% | 28.6% | 19.1% |
| ZC3HAV1      | 56829     | 20.4% | 16.8% | 20.3% | 19.1% |
| LOC92346     | 92346     | 7.2%  | 16.2% | 34.1% | 19.1% |
| GAPDS        | 26330     | 31.7% | 10.7% | 15.0% | 19.1% |
| CDCA7        | 83879     | 21.2% | 23.6% | 12.6% | 19.1% |
| DNAJC1       | 64215     | 27.4% | 19.3% | 10.7% | 19.1% |
| HTR1A        | 3350      | 15.5% | 22.4% | 19.5% | 19.1% |
| CCNA2        | 890       | 31.1% | 15.4% | 11.0% | 19.2% |
| EIF4E2       | 9470      | 22.7% | 16.3% | 18.5% | 19.2% |
| MCFP         | 55972     | 16.7% | 13.1% | 27.6% | 19.2% |
| MGC32124     | 124936    | 22.7% | 16.5% | 18.3% | 19.2% |
| B4GALT2      | 8704      | 25.4% | 6.5%  | 25.5% | 19.2% |
| LPIN3        | 64900     | 23.3% | 15.7% | 18.4% | 19.2% |
| TTF2         | 8458      | 17.9% | 17.6% | 22.0% | 19.2% |
| SGNE1        | 6447      | 22.3% | 9.9%  | 25.3% | 19.2% |
| NOL9         | 79707     | 20.0% | 16.5% | 21.0% | 19.2% |
| MRS2L        | 57380     | 32.3% | 15.3% | 9.8%  | 19.2% |
| CD207        | 50489     | 24.8% | 12.4% | 20.2% | 19.2% |
| GCN1L1       | 10985     | 24.8% | 15.3% | 17.4% | 19.2% |
| RENT1        | 5976      | 27.3% | 11.9% | 18.3% | 19.2% |
| ZNF543       | 125919    | 18.9% | 16.7% | 21.9% | 19.2% |
| GUCY1A2      | 2977      | 34.1% | 8.5%  | 14.8% | 19.2% |
| LOC51333     | 51333     | 21.8% | 10.5% | 25.2% | 19.2% |
| LOC440905    | 440905    | 24.6% | 22.7% | 10.1% | 19.2% |
| ENG          | 2022      | 14.1% | 21.3% | 22.1% | 19.2% |
| SLC13A1      | 6561      | 22.0% | 13.4% | 22.2% | 19.2% |
| NOTCH3       | 4854      | 23.3% | 14.6% | 19.6% | 19.2% |
| POPC2        | 64091     | 9.8%  | 17.3% | 30.4% | 19.2% |
| SP192        | 60313     | 25.2% | 6.1%  | 26.2% | 19.2% |
| EIF4ENIF1    | 56478     | 19.9% | 20.7% | 17.0% | 19.2% |
| ACAS2L       | 84532     | 14.7% | 26.3% | 16.5% | 19.2% |
| ARHGAP20     | 57569     | 29.7% | 10.8% | 17.0% | 19.2% |
| SLC25A19     | 60386     | 15.1% | 14.9% | 27.5% | 19.2% |
| HEY2         | 23493     | 19.5% | 12.2% | 25.9% | 19.2% |
| INPPL1       | 3636      | 18.6% | 19.0% | 20.0% | 19.2% |
| PDLIM3       | 27295     | 31.7% | 8.4%  | 17.4% | 19.2% |
| DNM2         | 1785      | 19.2% | 16.9% | 21.4% | 19.2% |
| CCNB1IP1     | 57820     | 23.4% | 17.4% | 16.8% | 19.2% |
| UNC84B       | 25777     | 22.9% | 13.7% | 21.0% | 19.2% |
| MGC48628     | 401145    | 20.0% | 12.0% | 25.6% | 19.2% |
| GRM6         | 2916      | 19.4% | 17.8% | 20.3% | 19.2% |
| SCPEP1       | 59342     | 27.4% | 9.6%  | 20.6% | 19.2% |
| FLJ22582     | 80115     | 15.7% | 12.3% | 29.6% | 19.2% |
| SELPLG       | 6404      | 29.7% | 8.8%  | 19.1% | 19.2% |
| POLR2I       | 5438      | 16.0% | 14.9% | 26.8% | 19.2% |
| DMXL1        | 1657      | 25.4% | 21.8% | 10.4% | 19.2% |
| DEFB104B     | 503618    | 31.0% | 15.8% | 10.8% | 19.2% |

|           |        |       |       |       |       |
|-----------|--------|-------|-------|-------|-------|
| TSPYL5    | 85453  | 23.9% | 17.4% | 16.3% | 19.2% |
| C17ORF27  | 57674  | 20.1% | 15.9% | 21.6% | 19.2% |
| KIAA1530  | 57654  | 33.6% | 15.0% | 9.0%  | 19.2% |
| MGC19764  | 162394 | 31.5% | 8.3%  | 17.9% | 19.2% |
| ATP11C    | 286410 | 13.7% | 27.4% | 16.5% | 19.2% |
| NAC3IN    | 23301  | 12.0% | 15.1% | 30.5% | 19.2% |
| MEF2D     | 4209   | 17.2% | 16.2% | 24.2% | 19.2% |
| FLJ38705  | 286128 | 23.9% | 9.8%  | 23.9% | 19.2% |
| HOZFP     | 152518 | 18.7% | 11.4% | 27.6% | 19.2% |
| ULBP2     | 80328  | 15.0% | 20.5% | 22.1% | 19.2% |
| KLRC2     | 3822   | 23.8% | 21.2% | 12.6% | 19.2% |
| ZSWIM1    | 90204  | 14.0% | 25.4% | 18.3% | 19.2% |
| CD72      | 971    | 22.3% | 12.5% | 22.8% | 19.2% |
| DPGR1     | 135656 | 28.0% | 13.4% | 16.3% | 19.2% |
| FLJ10948  | 55268  | 16.3% | 7.2%  | 34.1% | 19.2% |
| BCL6B     | 255877 | 15.4% | 15.8% | 26.4% | 19.2% |
| LTB4R2    | 56413  | 23.6% | 20.3% | 13.7% | 19.2% |
| GMIP      | 51291  | 10.8% | 26.8% | 20.1% | 19.2% |
| FLJ34154  | 283450 | 20.5% | 13.9% | 23.3% | 19.2% |
| AKAP9     | 10142  | 24.7% | 14.8% | 18.2% | 19.2% |
| MOCS3     | 27304  | 27.3% | 14.7% | 15.6% | 19.2% |
| LCE3D     | 84648  | 30.0% | 21.4% | 6.3%  | 19.2% |
| MAK       | 4117   | 22.7% | 20.0% | 15.0% | 19.2% |
| CCR3      | 1232   | 19.2% | 19.1% | 19.4% | 19.2% |
| FLJ40321  | 284355 | 16.0% | 23.9% | 17.8% | 19.2% |
| JUNB      | 3726   | 25.5% | 21.2% | 10.9% | 19.2% |
| SECP43    | 54952  | 17.5% | 11.0% | 29.2% | 19.2% |
| TRIM3     | 10612  | 22.8% | 17.0% | 17.9% | 19.2% |
| VIPR1     | 7433   | 17.4% | 17.9% | 22.4% | 19.2% |
| TRIM4     | 89122  | 15.2% | 16.9% | 25.7% | 19.2% |
| LOC339457 | 339457 | 22.7% | 17.3% | 17.7% | 19.2% |
| GIYD1     | 548593 | 25.0% | 17.5% | 15.2% | 19.2% |
| LOC387755 | 387755 | 24.3% | 7.2%  | 26.2% | 19.2% |
| ARIH1     | 25820  | 20.6% | 13.0% | 24.1% | 19.2% |
| ABCC12    | 94160  | 29.3% | 11.4% | 17.0% | 19.2% |
| FBXO3     | 26273  | 17.1% | 16.6% | 24.1% | 19.2% |
| OR4K17    | 390436 | 19.2% | 17.2% | 21.4% | 19.2% |
| FLJ14957  | 84952  | 15.7% | 12.3% | 29.8% | 19.3% |
| MTNR1B    | 4544   | 23.8% | 9.9%  | 24.0% | 19.3% |
| ITGB8     | 3696   | 23.2% | 12.3% | 22.2% | 19.3% |
| MYB       | 4602   | 27.6% | 17.1% | 13.0% | 19.3% |
| CD38      | 952    | 17.4% | 16.6% | 23.7% | 19.3% |
| BPY2IP1   | 55201  | 16.2% | 9.7%  | 31.9% | 19.3% |
| C19ORF23  | 148046 | 18.0% | 17.0% | 22.7% | 19.3% |
| D4ST1     | 113189 | 24.8% | 9.3%  | 23.7% | 19.3% |
| PGAM1     | 5223   | 19.8% | 23.2% | 14.8% | 19.3% |
| ITSN2     | 50618  | 17.9% | 19.8% | 20.0% | 19.3% |
| FLJ14768  | 84922  | 10.4% | 7.9%  | 39.5% | 19.3% |
| C1ORF29   | 10964  | 27.0% | 13.0% | 17.7% | 19.3% |
| HMG4      | 10473  | 21.9% | 14.6% | 21.3% | 19.3% |
| OR9A4     | 130075 | 23.2% | 18.9% | 15.6% | 19.3% |
| KIAA1068  | 23386  | 13.4% | 17.4% | 26.9% | 19.3% |
| DLX4      | 1748   | 35.4% | 10.0% | 12.4% | 19.3% |
| ZNF423    | 23090  | 27.2% | 16.1% | 14.4% | 19.3% |
| C20ORF166 | 128826 | 23.2% | 16.7% | 18.0% | 19.3% |
| RHOA      | 387    | 25.1% | 18.4% | 14.3% | 19.3% |
| NDUFV1    | 4723   | 15.9% | 22.3% | 19.6% | 19.3% |
| RAB42     | 115273 | 23.5% | 15.6% | 18.7% | 19.3% |
| SP5       | 389058 | 20.5% | 22.1% | 15.3% | 19.3% |
| SSA2      | 6738   | 14.5% | 13.5% | 29.8% | 19.3% |
| HEMK1     | 51409  | 23.1% | 12.5% | 22.2% | 19.3% |
| WBP2      | 23558  | 22.2% | 16.4% | 19.2% | 19.3% |
| AGMAT     | 79814  | 21.3% | 17.8% | 18.7% | 19.3% |
| MAC30     | 27346  | 22.0% | 11.6% | 24.2% | 19.3% |
| FOXE1     | 2304   | 27.3% | 9.1%  | 21.5% | 19.3% |
| SIDT2     | 51092  | 13.4% | 16.8% | 27.6% | 19.3% |
| GPR116    | 221395 | 19.6% | 19.4% | 18.9% | 19.3% |
| GAL3ST3   | 89792  | 10.7% | 21.2% | 25.9% | 19.3% |
| STK32A    | 202374 | 22.3% | 16.8% | 18.8% | 19.3% |
| FLJ90166  | 164284 | 14.1% | 12.7% | 31.1% | 19.3% |
| HPS1      | 3257   | 26.1% | 16.2% | 15.6% | 19.3% |
| SAA2      | 6289   | 22.3% | 20.3% | 15.2% | 19.3% |
| TAF10     | 6881   | 13.5% | 19.8% | 24.6% | 19.3% |
| MBNL2     | 10150  | 16.4% | 16.2% | 25.3% | 19.3% |
| FECH      | 2235   | 17.4% | 21.3% | 19.1% | 19.3% |
| ERCC4     | 2072   | 19.3% | 16.2% | 22.4% | 19.3% |
| PRG4      | 10216  | 30.2% | 14.3% | 13.4% | 19.3% |
| LOC56902  | 56902  | 18.0% | 11.0% | 28.9% | 19.3% |
| MCM2      | 4171   | 27.6% | 8.0%  | 22.3% | 19.3% |
| DNCL2A    | 83658  | 24.4% | 14.7% | 18.8% | 19.3% |
| KIAA1018  | 22909  | 23.7% | 9.7%  | 24.6% | 19.3% |
| PCDHGA6   | 56109  | 16.5% | 21.2% | 20.2% | 19.3% |
| C10ORF32  | 119032 | 26.8% | 18.5% | 12.6% | 19.3% |
| BLNK      | 29760  | 7.1%  | 15.4% | 35.4% | 19.3% |
| SLC6A7    | 6534   | 22.3% | 18.2% | 17.4% | 19.3% |
| RAC1      | 5879   | 26.6% | 10.0% | 21.2% | 19.3% |
| RNF44     | 22838  | 26.4% | 18.2% | 13.3% | 19.3% |
| MASS1     | 84059  | 19.2% | 19.0% | 19.6% | 19.3% |
| HSPB1     | 3315   | 18.6% | 11.8% | 27.5% | 19.3% |
| ZNRF2     | 223082 | 17.5% | 16.8% | 23.6% | 19.3% |
| MGC39724  | 149685 | 13.9% | 19.4% | 24.7% | 19.3% |
| FLJ10490  | 55150  | 28.5% | 9.9%  | 19.5% | 19.3% |
| ATP11B    | 23200  | 21.5% | 16.3% | 20.1% | 19.3% |
| SPTB      | 6710   | 28.1% | 12.5% | 17.4% | 19.3% |
| TMF1      | 7110   | 21.9% | 14.0% | 22.0% | 19.3% |
| KCNH1     | 3756   | 21.8% | 18.3% | 17.9% | 19.3% |
| LOC255374 | 255374 | 18.5% | 18.3% | 21.2% | 19.3% |
| MGC16385  | 92806  | 10.3% | 18.5% | 29.2% | 19.3% |

|              |        |       |       |       |       |
|--------------|--------|-------|-------|-------|-------|
| FLJ42654     | 127845 | 13.9% | 13.9% | 30.1% | 19.3% |
| KRT7         | 3855   | 28.9% | 17.1% | 11.9% | 19.3% |
| IGJ          | 3512   | 21.9% | 19.4% | 16.7% | 19.3% |
| CAGLP        | 163688 | 15.7% | 17.5% | 24.7% | 19.3% |
| SRI          | 6717   | 15.2% | 15.8% | 27.0% | 19.3% |
| TPT1         | 7178   | 18.0% | 17.4% | 22.6% | 19.3% |
| FLJ20308     | 54890  | 14.9% | 18.1% | 25.0% | 19.3% |
| BMP88        | 656    | 19.5% | 19.7% | 18.8% | 19.3% |
| POLR2L       | 5441   | 28.0% | 9.6%  | 20.4% | 19.3% |
| GPR156       | 165829 | 19.9% | 18.2% | 19.9% | 19.3% |
| MGC27019     | 150483 | 20.1% | 19.2% | 18.6% | 19.3% |
| NT5C2        | 22978  | 19.0% | 20.9% | 18.1% | 19.3% |
| TYRO3        | 7301   | 24.1% | 14.9% | 19.0% | 19.3% |
| DOK2         | 9046   | 22.5% | 15.1% | 20.3% | 19.3% |
| Sep-01       | 54464  | 16.8% | 17.5% | 23.7% | 19.3% |
| LOC91661     | 91661  | 22.6% | 4.2%  | 31.2% | 19.3% |
| OGFRL1       | 79627  | 27.7% | 11.4% | 19.0% | 19.3% |
| PRSS2        | 5645   | 12.6% | 19.0% | 26.4% | 19.3% |
| ADAMTS1      | 9510   | 15.9% | 22.0% | 20.1% | 19.3% |
| PPFIA4       | 8497   | 18.6% | 24.2% | 15.3% | 19.3% |
| DMPK         | 1760   | 17.9% | 17.4% | 22.7% | 19.3% |
| NME4         | 4833   | 20.9% | 22.9% | 14.2% | 19.3% |
| OTUD4        | 54726  | 27.3% | 8.8%  | 22.0% | 19.3% |
| CLIC1        | 1192   | 24.4% | 15.1% | 18.6% | 19.3% |
| DAZ          | 1617   | 18.4% | 14.3% | 25.4% | 19.4% |
| DGUOK        | 1716   | 17.4% | 28.2% | 12.5% | 19.4% |
| LOC338879    | 338879 | 14.3% | 11.0% | 32.8% | 19.4% |
| MAPKBIP2     | 23542  | 21.3% | 16.7% | 20.1% | 19.4% |
| IGF2R        | 3482   | 23.6% | 13.8% | 20.6% | 19.4% |
| PCYT1A       | 5130   | 24.8% | 11.1% | 22.2% | 19.4% |
| SLC39A7      | 7922   | 23.7% | 21.7% | 12.6% | 19.4% |
| RXRA         | 6256   | 23.5% | 21.9% | 12.7% | 19.4% |
| UGCG         | 7357   | 21.6% | 20.3% | 16.2% | 19.4% |
| KHK          | 3795   | 20.7% | 18.8% | 18.6% | 19.4% |
| UPP2         | 151531 | 26.4% | 14.5% | 17.1% | 19.4% |
| FBXW11       | 23291  | 19.9% | 17.2% | 20.9% | 19.4% |
| ABCB11       | 8647   | 37.5% | 8.9%  | 11.7% | 19.4% |
| RUVBL2       | 10856  | 14.2% | 20.0% | 23.9% | 19.4% |
| TDGF1        | 6997   | 15.2% | 22.9% | 20.0% | 19.4% |
| FLT4         | 2324   | 9.7%  | 31.9% | 16.5% | 19.4% |
| RHOBTB3      | 22836  | 19.4% | 18.0% | 20.7% | 19.4% |
| SLC6A1       | 6529   | 35.3% | 9.5%  | 13.3% | 19.4% |
| KIAA1765     | 85443  | 23.6% | 16.7% | 17.8% | 19.4% |
| SS18         | 6760   | 20.7% | 19.1% | 18.3% | 19.4% |
| PRDM2        | 7799   | 24.1% | 14.6% | 19.4% | 19.4% |
| LOC440093    | 440093 | 20.0% | 16.3% | 21.8% | 19.4% |
| RASD2        | 23551  | 22.2% | 24.2% | 11.7% | 19.4% |
| KCNK1        | 3775   | 26.7% | 11.1% | 20.3% | 19.4% |
| MGC32871     | 119467 | 19.4% | 12.0% | 26.7% | 19.4% |
| MGC9564      | 113235 | 43.0% | 5.8%  | 9.4%  | 19.4% |
| ZNF286       | 57335  | 25.4% | 13.1% | 19.6% | 19.4% |
| MGC16279     | 85002  | 20.5% | 12.7% | 25.0% | 19.4% |
| BCAS3        | 54828  | 28.9% | 15.2% | 14.0% | 19.4% |
| FLJ11142     | 55779  | 11.2% | 14.0% | 32.9% | 19.4% |
| GPR34        | 2857   | 17.3% | 23.5% | 17.4% | 19.4% |
| DKFZP564M082 | 25906  | 12.5% | 9.3%  | 36.4% | 19.4% |
| PGBD3        | 267004 | 13.0% | 15.3% | 29.8% | 19.4% |
| ACTG1        | 71     | 21.8% | 19.1% | 17.2% | 19.4% |
| CD1E         | 913    | 16.5% | 14.4% | 27.3% | 19.4% |
| DNAH3        | 55567  | 35.0% | 10.5% | 12.7% | 19.4% |
| FN3KRP       | 79672  | 18.8% | 21.6% | 17.9% | 19.4% |
| HLA-C        | 3107   | 14.8% | 29.7% | 13.7% | 19.4% |
| FLJ10521     | 55160  | 11.3% | 16.9% | 29.9% | 19.4% |
| CRIM1        | 51232  | 9.9%  | 32.8% | 15.5% | 19.4% |
| KCTD20       | 222658 | 25.0% | 11.1% | 22.1% | 19.4% |
| KIAA0186     | 9837   | 15.0% | 18.4% | 24.8% | 19.4% |
| FLJ25422     | 202151 | 10.8% | 16.6% | 30.8% | 19.4% |
| CASP8AP2     | 9994   | 19.2% | 24.6% | 14.4% | 19.4% |
| DNMBP        | 23268  | 22.2% | 10.1% | 25.9% | 19.4% |
| KRTAP4-14    | 85282  | 31.8% | 4.5%  | 21.9% | 19.4% |
| LOC283849    | 283849 | 11.6% | 22.0% | 24.6% | 19.4% |
| PISD         | 23761  | 25.3% | 17.2% | 15.8% | 19.4% |
| ADAMTSL1     | 92949  | 27.7% | 23.4% | 7.1%  | 19.4% |
| BCL2L14      | 79370  | 27.3% | 16.7% | 14.3% | 19.4% |
| SCAP2        | 8935   | 20.8% | 15.7% | 21.7% | 19.4% |
| CAND2        | 23066  | 27.7% | 13.9% | 16.6% | 19.4% |
| TMEFF2       | 23671  | 22.5% | 18.5% | 17.2% | 19.4% |
| BUB3         | 9184   | 17.2% | 17.8% | 23.2% | 19.4% |
| CENTB1       | 9744   | 21.2% | 14.1% | 23.0% | 19.4% |
| GPRCGA       | 222545 | 16.4% | 19.6% | 22.2% | 19.4% |
| ZNF575       | 284346 | 17.1% | 21.6% | 19.5% | 19.4% |
| FLJ90396     | 163049 | 12.6% | 23.2% | 22.5% | 19.4% |
| GPC5         | 2262   | 36.3% | 8.0%  | 14.0% | 19.4% |
| IERS         | 51278  | 25.9% | 25.0% | 7.3%  | 19.4% |
| PPAPDC2      | 403313 | 21.7% | 21.6% | 14.9% | 19.4% |
| CSORF19      | 51308  | 20.2% | 15.2% | 22.9% | 19.4% |
| SUCLG2       | 8801   | 23.2% | 21.1% | 14.0% | 19.4% |
| TUBA3        | 7846   | 5.9%  | 19.0% | 33.3% | 19.4% |
| PRH          | 51052  | 13.7% | 22.9% | 21.6% | 19.4% |
| TGM5         | 9333   | 20.3% | 15.8% | 22.2% | 19.4% |
| KIF26B       | 55083  | 23.8% | 16.8% | 17.6% | 19.4% |
| SMAD3        | 4088   | 27.7% | 11.4% | 19.2% | 19.4% |
| REPIN1       | 29803  | 21.8% | 17.2% | 19.3% | 19.4% |
| RAD9B        | 144715 | 22.8% | 15.5% | 19.9% | 19.4% |
| R30953_1     | 56269  | 13.5% | 17.5% | 27.3% | 19.4% |
| KCNK4        | 50801  | 23.3% | 16.0% | 18.9% | 19.4% |
| GTL3         | 29105  | 10.9% | 21.5% | 25.9% | 19.4% |
| SAFB         | 6294   | 11.7% | 28.4% | 18.1% | 19.4% |

|               |        |       |       |       |       |
|---------------|--------|-------|-------|-------|-------|
| GDF8          | 2660   | 16.3% | 19.2% | 22.8% | 19.4% |
| FGIF          | 54851  | 9.0%  | 13.5% | 35.8% | 19.4% |
| FLJ23129      | 79819  | 17.1% | 15.8% | 25.4% | 19.4% |
| PHF11         | 51131  | 20.5% | 14.5% | 23.3% | 19.4% |
| PAX7          | 5081   | 19.9% | 19.9% | 18.5% | 19.4% |
| C6ORF55       | 51534  | 17.8% | 19.4% | 21.1% | 19.4% |
| PDE5A         | 8654   | 26.8% | 15.2% | 16.4% | 19.4% |
| DIP13B        | 55198  | 27.2% | 21.5% | 9.7%  | 19.4% |
| PRRG2         | 5639   | 17.4% | 18.3% | 22.7% | 19.4% |
| GFRA2         | 2675   | 27.5% | 11.9% | 19.0% | 19.4% |
| MGC39696      | 255193 | 18.6% | 16.3% | 23.4% | 19.4% |
| WBP4          | 11193  | 13.0% | 19.6% | 25.7% | 19.4% |
| LOC150379     | 150379 | 13.5% | 19.7% | 25.1% | 19.4% |
| LRRC10        | 376132 | 20.4% | 18.8% | 19.1% | 19.4% |
| FBLN2         | 2199   | 13.0% | 19.6% | 25.7% | 19.4% |
| HLA-DRB1      | 3123   | 24.0% | 9.0%  | 25.3% | 19.4% |
| MLYCD         | 23417  | 22.6% | 17.4% | 18.3% | 19.5% |
| BCAN          | 63827  | 23.4% | 15.3% | 19.6% | 19.5% |
| PLSCR1        | 5359   | 22.5% | 7.7%  | 28.1% | 19.5% |
| NR5A2         | 2494   | 33.1% | 10.8% | 14.5% | 19.5% |
| CHRM4         | 1132   | 18.6% | 17.5% | 22.2% | 19.5% |
| LGALS4        | 3960   | 18.7% | 21.2% | 18.5% | 19.5% |
| GPR3          | 2827   | 0.0%  | 40.0% | 18.4% | 19.5% |
| BLR1          | 643    | 23.3% | 13.1% | 21.9% | 19.5% |
| FLJ10579      | 55177  | 19.3% | 13.9% | 25.2% | 19.5% |
| KIAA1579      | 55225  | 19.9% | 15.0% | 23.5% | 19.5% |
| BBS5          | 129880 | 10.0% | 23.5% | 24.9% | 19.5% |
| LOC550631     | 550631 | 25.8% | 15.5% | 17.1% | 19.5% |
| YARS          | 8565   | 19.4% | 19.0% | 20.0% | 19.5% |
| ZG16          | 123887 | 18.4% | 15.8% | 24.2% | 19.5% |
| BCL2L2        | 599    | 20.3% | 20.3% | 17.8% | 19.5% |
| CALN1         | 83698  | 22.4% | 17.3% | 18.8% | 19.5% |
| FLJ35843      | 160762 | 16.6% | 10.3% | 31.5% | 19.5% |
| THRAP6        | 90390  | 25.0% | 15.6% | 17.8% | 19.5% |
| CACNG4        | 27092  | 27.0% | 10.0% | 21.5% | 19.5% |
| CYP39A1       | 51302  | 33.1% | 11.9% | 13.4% | 19.5% |
| ARF3          | 377    | 30.9% | 9.6%  | 17.9% | 19.5% |
| GALR1         | 2587   | 21.6% | 20.2% | 16.6% | 19.5% |
| HSPCB         | 3326   | 23.2% | 15.4% | 19.8% | 19.5% |
| GABRA6        | 2559   | 24.3% | 14.5% | 19.6% | 19.5% |
| DKFZP434F2021 | 25871  | 18.7% | 21.7% | 18.0% | 19.5% |
| RBP7          | 116362 | 19.3% | 19.4% | 19.7% | 19.5% |
| OSBP16        | 114880 | 31.5% | 12.8% | 14.1% | 19.5% |
| VMD2L1        | 54831  | 19.5% | 14.3% | 24.6% | 19.5% |
| DFFA          | 1676   | 19.0% | 16.5% | 23.0% | 19.5% |
| TRHR          | 7201   | 27.0% | 21.2% | 10.3% | 19.5% |
| KIF22         | 3835   | 30.6% | 10.9% | 16.9% | 19.5% |
| MITF          | 4286   | 23.3% | 12.7% | 22.5% | 19.5% |
| COPEB         | 1316   | 28.9% | 14.8% | 14.8% | 19.5% |
| GBL           | 64223  | 20.0% | 23.1% | 15.4% | 19.5% |
| PAFAH1B2      | 5049   | 22.6% | 13.2% | 22.6% | 19.5% |
| P2RX3         | 5024   | 30.1% | 6.8%  | 21.5% | 19.5% |
| PTPRC         | 5788   | 14.5% | 31.7% | 12.2% | 19.5% |
| KIAA0298      | 9866   | 14.4% | 17.5% | 26.6% | 19.5% |
| IRAK2         | 3656   | 15.6% | 22.7% | 20.2% | 19.5% |
| PDGFRB        | 5159   | 19.9% | 18.8% | 19.9% | 19.5% |
| FHL3          | 2275   | 22.9% | 10.2% | 25.5% | 19.5% |
| RAPH1         | 65059  | 14.5% | 24.0% | 20.0% | 19.5% |
| C14ORF152     | 90050  | 22.5% | 16.1% | 19.9% | 19.5% |
| IDI2          | 91734  | 19.4% | 19.5% | 19.6% | 19.5% |
| ASPA          | 443    | 18.4% | 17.0% | 23.2% | 19.5% |
| KCNIP2        | 30819  | 27.8% | 11.0% | 19.8% | 19.5% |
| NUDT10        | 170685 | 10.3% | 25.9% | 22.4% | 19.5% |
| KIAA1510      | 57642  | 32.0% | 3.2%  | 23.3% | 19.5% |
| FLJ20032      | 54790  | 19.0% | 16.4% | 23.2% | 19.5% |
| C2ORF23       | 65055  | 12.7% | 11.0% | 34.8% | 19.5% |
| CRYAB         | 1410   | 22.0% | 18.8% | 17.7% | 19.5% |
| CHIC2         | 26511  | 18.5% | 24.9% | 15.1% | 19.5% |
| C5ORF6        | 51307  | 21.3% | 9.7%  | 27.5% | 19.5% |
| MAML3         | 55534  | 33.8% | 6.8%  | 17.9% | 19.5% |
| KCND2         | 3751   | 18.6% | 16.1% | 23.8% | 19.5% |
| MYH7          | 4625   | 37.7% | 5.5%  | 15.3% | 19.5% |
| LOC115294     | 115294 | 20.5% | 17.7% | 20.3% | 19.5% |
| ZFYVE1        | 53349  | 22.3% | 18.7% | 17.5% | 19.5% |
| SLC4A1AP      | 22950  | 29.1% | 13.1% | 16.4% | 19.5% |
| DKFZP564K2062 | 25880  | 14.9% | 11.8% | 31.8% | 19.5% |
| MGC14151      | 84316  | 31.8% | 12.1% | 14.6% | 19.5% |
| FLJ40432      | 151195 | 21.3% | 19.9% | 17.4% | 19.5% |
| CENPH         | 64946  | 19.5% | 16.8% | 22.3% | 19.5% |
| DHX33         | 56919  | 19.2% | 18.8% | 20.5% | 19.5% |
| CASP5         | 838    | 24.4% | 10.7% | 23.5% | 19.5% |
| KCNG1         | 3755   | 23.8% | 17.5% | 17.3% | 19.5% |
| XAGE-5        | 170627 | 17.4% | 15.2% | 26.0% | 19.5% |
| SLAMF9        | 89886  | 30.3% | 21.5% | 6.8%  | 19.5% |
| DIO3          | 1735   | 15.9% | 14.1% | 28.6% | 19.5% |
| TMCC3         | 57458  | 28.4% | 15.6% | 14.6% | 19.5% |
| GABRG1        | 2565   | 30.3% | 10.9% | 17.4% | 19.5% |
| SLC23A1       | 9963   | 28.0% | 15.9% | 14.7% | 19.5% |
| BC002942      | 91289  | 16.8% | 14.8% | 27.0% | 19.5% |
| CYP11B1       | 1584   | 20.6% | 18.2% | 19.8% | 19.5% |
| ABC87         | 22     | 15.2% | 16.1% | 27.3% | 19.5% |
| SLC9A5        | 6553   | 22.5% | 14.2% | 21.9% | 19.5% |
| OR2A1         | 81392  | 14.1% | 16.2% | 28.4% | 19.5% |
| FLJ36525      | 259173 | 15.6% | 12.0% | 31.0% | 19.5% |
| IREM2         | 342510 | 19.4% | 10.0% | 29.2% | 19.5% |
| SRRM1         | 10250  | 9.0%  | 21.2% | 28.4% | 19.5% |
| MAPK8IP1      | 9479   | 28.7% | 15.1% | 14.8% | 19.5% |
| TECTA         | 7007   | 26.5% | 9.9%  | 22.3% | 19.5% |



|              |        |       |       |       |       |
|--------------|--------|-------|-------|-------|-------|
| FLJ10996     | 54520  | 15.6% | 13.4% | 29.6% | 19.5% |
| GPR157       | 80045  | 21.6% | 18.1% | 18.9% | 19.5% |
| HP           | 3240   | 19.4% | 12.5% | 26.8% | 19.5% |
| NONO         | 4841   | 15.5% | 15.1% | 28.1% | 19.5% |
| SLC22A9      | 114571 | 22.1% | 21.4% | 15.1% | 19.5% |
| FLJ10539     | 55164  | 19.0% | 7.9%  | 31.7% | 19.5% |
| CLCNKB       | 1188   | 22.6% | 13.3% | 22.8% | 19.6% |
| PRKACG       | 5568   | 26.2% | 17.9% | 14.6% | 19.6% |
| EML4         | 27436  | 19.6% | 18.2% | 20.9% | 19.6% |
| TCP11        | 6954   | 19.0% | 11.9% | 27.8% | 19.6% |
| ACVR1C       | 130399 | 14.9% | 18.5% | 25.3% | 19.6% |
| ZNF383       | 163087 | 17.9% | 12.2% | 28.6% | 19.6% |
| ALOXE3       | 59344  | 25.6% | 9.2%  | 23.8% | 19.6% |
| TCF12        | 6938   | 26.8% | 10.7% | 21.3% | 19.6% |
| CFHL2        | 3080   | 17.4% | 12.4% | 28.9% | 19.6% |
| CDC10        | 989    | 29.2% | 13.0% | 16.5% | 19.6% |
| CPAMD8       | 27151  | 12.9% | 24.7% | 21.2% | 19.6% |
| LOC342357    | 342357 | 29.0% | 16.2% | 13.5% | 19.6% |
| CLSTN2       | 64084  | 26.4% | 20.0% | 12.3% | 19.6% |
| KIAA0355     | 9710   | 25.5% | 10.9% | 22.3% | 19.6% |
| EIF4E        | 1977   | 31.7% | 4.4%  | 22.6% | 19.6% |
| LOC388503    | 388503 | 25.4% | 17.6% | 15.7% | 19.6% |
| ORS1B2       | 79345  | 15.3% | 21.3% | 22.1% | 19.6% |
| KCNK12       | 56660  | 21.4% | 15.6% | 21.7% | 19.6% |
| PRKRIR       | 5612   | 18.0% | 22.0% | 18.8% | 19.6% |
| FADD         | 8772   | 22.4% | 16.0% | 20.3% | 19.6% |
| LOC283871    | 283871 | 20.6% | 20.3% | 17.9% | 19.6% |
| RP11-564C4.1 | 653308 | 10.9% | 15.7% | 32.2% | 19.6% |
| LOC90378     | 90378  | 12.8% | 13.5% | 32.4% | 19.6% |
| TIAM1        | 7074   | 18.0% | 16.9% | 23.9% | 19.6% |
| SLC27A3      | 11000  | 29.2% | 16.9% | 12.7% | 19.6% |
| ALX3         | 257    | 20.8% | 10.3% | 27.6% | 19.6% |
| TMEM20       | 159371 | 11.4% | 22.3% | 25.2% | 19.6% |
| SPSB3        | 90864  | 28.3% | 6.7%  | 23.8% | 19.6% |
| FLJ11773     | 60673  | 19.1% | 11.7% | 28.0% | 19.6% |
| GBE1         | 2632   | 24.3% | 12.3% | 22.2% | 19.6% |
| C9ORF24      | 84688  | 17.7% | 22.3% | 18.8% | 19.6% |
| KIAA1093     | 23112  | 18.5% | 13.2% | 27.1% | 19.6% |
| FLJ20232     | 54471  | 20.2% | 13.5% | 25.1% | 19.6% |
| DEAD1        | 134637 | 20.3% | 14.3% | 24.2% | 19.6% |
| FLJ13491     | 79676  | 19.0% | 9.9%  | 30.0% | 19.6% |
| RTCD1        | 8634   | 18.5% | 15.0% | 25.4% | 19.6% |
| MPP4         | 58538  | 20.4% | 19.6% | 18.8% | 19.6% |
| FMR1NB       | 158521 | 22.7% | 19.0% | 17.1% | 19.6% |
| ICOSL        | 23308  | 16.3% | 18.5% | 24.0% | 19.6% |
| C9ORF10      | 23196  | 21.8% | 22.8% | 14.2% | 19.6% |
| JMJD1C       | 221037 | 27.0% | 10.7% | 21.1% | 19.6% |
| ZNF606       | 80095  | 20.2% | 16.7% | 22.0% | 19.6% |
| MF12         | 4241   | 23.2% | 16.2% | 19.4% | 19.6% |
| EPPB9        | 27077  | 13.4% | 12.6% | 32.9% | 19.6% |
| FBXO40       | 51725  | 19.5% | 19.5% | 19.9% | 19.6% |
| SWAP70       | 23075  | 14.8% | 21.6% | 22.4% | 19.6% |
| MCM3AP       | 8888   | 13.3% | 25.1% | 20.4% | 19.6% |
| CNP          | 1267   | 28.4% | 10.3% | 20.2% | 19.6% |
| TMEM41B      | 440026 | 19.0% | 12.4% | 27.4% | 19.6% |
| PBX4         | 80714  | 25.3% | 16.4% | 17.1% | 19.6% |
| SGCE         | 8910   | 21.1% | 16.7% | 21.1% | 19.6% |
| DR1          | 1810   | 27.9% | 4.9%  | 26.1% | 19.6% |
| NEDD5        | 4735   | 14.9% | 14.5% | 29.4% | 19.6% |
| STOML3       | 161003 | 27.3% | 15.4% | 16.2% | 19.6% |
| C6ORF150     | 115004 | 15.4% | 26.5% | 16.9% | 19.6% |
| LOC255189    | 255189 | 27.5% | 19.2% | 12.2% | 19.6% |
| FLJ10925     | 55262  | 17.8% | 14.2% | 26.8% | 19.6% |
| MGLL         | 11343  | 24.0% | 12.3% | 22.5% | 19.6% |
| COL6A3       | 1293   | 27.2% | 18.0% | 13.7% | 19.6% |
| UBE2F        | 140739 | 27.0% | 15.2% | 16.7% | 19.6% |
| GK2          | 2712   | 20.1% | 19.5% | 19.3% | 19.6% |
| MGC14156     | 84992  | 10.7% | 26.4% | 21.9% | 19.6% |
| HTRA         | 3360   | 24.0% | 14.4% | 20.5% | 19.6% |
| ERO1L        | 30001  | 19.0% | 7.8%  | 32.1% | 19.6% |
| SERPINB9     | 5272   | 20.1% | 12.3% | 26.5% | 19.6% |
| YIPF2        | 78992  | 23.9% | 19.4% | 15.6% | 19.6% |
| SLC12A6      | 9990   | 12.3% | 29.0% | 17.6% | 19.6% |
| AAT1         | 89876  | 19.5% | 8.7%  | 30.7% | 19.6% |
| HAAO         | 23498  | 34.7% | 11.4% | 12.8% | 19.6% |
| TNNT2        | 7139   | 19.1% | 23.3% | 16.5% | 19.6% |
| URKL1        | 54963  | 25.1% | 15.5% | 18.3% | 19.6% |
| MGC71745     | 133418 | 22.9% | 10.0% | 26.0% | 19.6% |
| HSPC163      | 29097  | 8.7%  | 30.0% | 20.3% | 19.6% |
| C19ORF32     | 92840  | 25.3% | 12.9% | 20.7% | 19.6% |
| ZNF570       | 148268 | 21.4% | 12.5% | 25.0% | 19.6% |
| PIB5PA       | 27124  | 12.8% | 21.8% | 24.3% | 19.6% |
| VIPR2        | 7434   | 19.3% | 18.9% | 20.7% | 19.6% |
| ACCN3        | 9311   | 23.9% | 14.7% | 20.3% | 19.6% |
| RARRES2      | 5919   | 34.3% | 8.3%  | 16.4% | 19.6% |
| KIAA1533     | 57655  | 13.4% | 14.4% | 31.1% | 19.6% |
| MALT1        | 10892  | 29.2% | 17.0% | 12.7% | 19.7% |
| FOXF2        | 2295   | 28.7% | 15.9% | 14.3% | 19.7% |
| DPYS         | 1807   | 30.2% | 3.6%  | 25.1% | 19.7% |
| MGC2749      | 79036  | 21.4% | 12.3% | 25.2% | 19.7% |
| ESPN         | 83715  | 10.8% | 14.8% | 33.3% | 19.7% |
| EIF353       | 8667   | 35.0% | 14.3% | 9.7%  | 19.7% |
| MGC26690     | 145773 | 21.7% | 10.4% | 26.9% | 19.7% |
| NEU3         | 10825  | 25.0% | 16.6% | 17.4% | 19.7% |
| COQ4         | 51117  | 21.0% | 13.9% | 24.1% | 19.7% |
| LRRC34       | 151827 | 25.4% | 14.1% | 19.5% | 19.7% |
| NPDD14       | 57035  | 19.0% | 11.6% | 28.4% | 19.7% |
| SLC38A6      | 145389 | 26.4% | 23.1% | 9.5%  | 19.7% |

|               |        |       |       |       |       |
|---------------|--------|-------|-------|-------|-------|
| SHC1          | 6464   | 21.3% | 19.2% | 18.5% | 19.7% |
| RAI16         | 64760  | 24.1% | 21.4% | 13.5% | 19.7% |
| NPAT          | 4863   | 28.2% | 9.4%  | 21.4% | 19.7% |
| NRF1          | 4899   | 18.6% | 18.3% | 22.1% | 19.7% |
| BAAT          | 570    | 19.5% | 13.6% | 25.9% | 19.7% |
| NOTCH1        | 4851   | 37.7% | 7.3%  | 14.0% | 19.7% |
| MFSD1         | 64747  | 17.8% | 21.9% | 19.2% | 19.7% |
| CGI-121       | 51002  | 13.2% | 19.2% | 26.6% | 19.7% |
| PTGFR         | 5737   | 15.7% | 25.7% | 17.6% | 19.7% |
| TARBP1        | 6894   | 28.0% | 14.5% | 16.5% | 19.7% |
| XKR9          | 389668 | 15.1% | 17.2% | 26.7% | 19.7% |
| SLC30A4       | 7782   | 20.3% | 22.4% | 16.3% | 19.7% |
| GPSN2         | 9524   | 28.4% | 14.4% | 16.2% | 19.7% |
| LOC51270      | 51270  | 19.4% | 8.9%  | 30.7% | 19.7% |
| KIAA0141      | 9812   | 16.7% | 14.2% | 28.2% | 19.7% |
| C6ORF80       | 25901  | 20.2% | 6.1%  | 32.7% | 19.7% |
| ATBF1         | 463    | 29.5% | 15.6% | 14.0% | 19.7% |
| FLJ20125      | 54826  | 19.5% | 8.6%  | 31.0% | 19.7% |
| DUSP10        | 11221  | 14.5% | 26.4% | 18.1% | 19.7% |
| F25965        | 55957  | 24.4% | 11.0% | 23.6% | 19.7% |
| SLC22A18      | 5002   | 19.5% | 14.2% | 25.4% | 19.7% |
| MGC29784      | 285367 | 20.4% | 9.9%  | 28.8% | 19.7% |
| MGC41945      | 138724 | 23.6% | 10.8% | 24.6% | 19.7% |
| ATRX          | 546    | 22.0% | 13.4% | 23.6% | 19.7% |
| STAF65(GAMMA) | 9913   | 13.8% | 15.6% | 29.6% | 19.7% |
| FLJ25444      | 254158 | 17.0% | 13.6% | 28.4% | 19.7% |
| LYPLA3        | 23659  | 26.4% | 13.6% | 19.0% | 19.7% |
| CNR1          | 1268   | 19.4% | 17.5% | 22.2% | 19.7% |
| FGF20         | 26281  | 32.2% | 10.2% | 16.7% | 19.7% |
| MYL3          | 4634   | 26.4% | 16.4% | 16.3% | 19.7% |
| DNAJA2        | 10294  | 14.7% | 20.6% | 23.8% | 19.7% |
| STK38         | 11329  | 14.8% | 25.9% | 18.4% | 19.7% |
| MCM5          | 4174   | 22.0% | 18.2% | 18.8% | 19.7% |
| RDHE2         | 195814 | 32.8% | 14.2% | 12.1% | 19.7% |
| SLC22A3       | 6581   | 22.8% | 16.1% | 20.1% | 19.7% |
| PORCN         | 64840  | 17.1% | 13.7% | 28.3% | 19.7% |
| RAB31         | 11031  | 25.2% | 17.2% | 16.7% | 19.7% |
| C6ORF21       | 259215 | 9.1%  | 30.0% | 20.0% | 19.7% |
| PDE10A        | 10846  | 18.1% | 16.0% | 25.0% | 19.7% |
| IFNA14        | 3448   | 21.6% | 18.7% | 18.8% | 19.7% |
| DHX38         | 9785   | 29.6% | 11.4% | 18.1% | 19.7% |
| C22ORF5       | 25829  | 30.4% | 9.3%  | 19.4% | 19.7% |
| IDH1          | 3417   | 20.2% | 14.2% | 24.7% | 19.7% |
| FLJ23018      | 79868  | 16.7% | 7.6%  | 34.8% | 19.7% |
| PDE6H         | 5149   | 35.1% | 10.1% | 13.9% | 19.7% |
| TFCP2         | 7024   | 25.2% | 18.3% | 15.6% | 19.7% |
| TDE2          | 57515  | 21.8% | 5.8%  | 31.4% | 19.7% |
| DEFB106       | 245909 | 25.9% | 0.0%  | 33.2% | 19.7% |
| PAF53         | 64425  | 23.8% | 12.7% | 22.6% | 19.7% |
| OR10H5        | 284433 | 29.9% | 12.0% | 17.3% | 19.7% |
| RAI17         | 57178  | 23.0% | 16.9% | 19.3% | 19.7% |
| HPGD          | 3248   | 21.8% | 14.7% | 22.6% | 19.7% |
| NT5C          | 30833  | 15.4% | 12.5% | 31.3% | 19.7% |
| PRO0149       | 29035  | 19.4% | 16.7% | 23.1% | 19.7% |
| RG56          | 9628   | 34.8% | 16.7% | 7.7%  | 19.7% |
| RAC2          | 5880   | 29.6% | 8.5%  | 21.0% | 19.7% |
| SC65          | 10609  | 6.7%  | 33.3% | 19.1% | 19.7% |
| CNGA1         | 1259   | 25.4% | 14.4% | 19.4% | 19.7% |
| FLJ10052      | 55061  | 15.5% | 23.6% | 20.1% | 19.7% |
| AUP1          | 550    | 13.7% | 18.5% | 26.9% | 19.7% |
| NAALAD2       | 10003  | 23.3% | 20.6% | 15.3% | 19.7% |
| BCL3          | 602    | 13.3% | 16.9% | 29.0% | 19.7% |
| UBE2T         | 29089  | 23.0% | 16.7% | 19.6% | 19.7% |
| SH2D3A        | 10045  | 18.9% | 21.8% | 18.5% | 19.7% |
| CYP46A1       | 10858  | 21.2% | 19.3% | 18.7% | 19.7% |
| HYPB          | 29072  | 27.3% | 7.8%  | 24.1% | 19.7% |
| PP            | 5464   | 24.4% | 17.4% | 17.4% | 19.7% |
| ORGA2         | 8590   | 25.5% | 13.0% | 20.7% | 19.7% |
| HAN11         | 10238  | 16.9% | 14.8% | 27.5% | 19.7% |
| FGF18         | 8817   | 18.9% | 15.3% | 25.0% | 19.7% |
| Sep-15        | 9403   | 31.3% | 13.3% | 14.6% | 19.7% |
| OSTM1         | 28962  | 31.7% | 14.8% | 12.7% | 19.7% |
| MIG12         | 58526  | 17.3% | 18.8% | 23.1% | 19.7% |
| POU2F3        | 25833  | 28.0% | 7.3%  | 23.9% | 19.7% |
| BTD           | 686    | 20.7% | 13.7% | 24.8% | 19.7% |
| PIGF          | 5281   | 20.9% | 19.5% | 18.8% | 19.7% |
| ARHGAP4       | 393    | 23.5% | 13.5% | 22.2% | 19.7% |
| DKFZP762K222  | 56977  | 25.1% | 6.2%  | 27.9% | 19.7% |
| CGI-115       | 51018  | 23.0% | 14.6% | 21.6% | 19.7% |
| PROK1         | 84432  | 25.9% | 19.0% | 14.3% | 19.7% |
| ADRA1B        | 147    | 14.5% | 24.5% | 20.2% | 19.7% |
| CTSS          | 1520   | 18.2% | 21.0% | 20.0% | 19.7% |
| GPR           | 11245  | 17.0% | 24.6% | 17.6% | 19.7% |
| SLC37A2       | 219855 | 18.9% | 11.6% | 28.7% | 19.7% |
| F9            | 2158   | 27.8% | 21.0% | 10.5% | 19.8% |
| ARX           | 170302 | 26.5% | 14.4% | 18.4% | 19.8% |
| WBSCR17       | 64409  | 33.1% | 6.3%  | 19.8% | 19.8% |
| ELAC2         | 60528  | 21.9% | 18.1% | 19.3% | 19.8% |
| MRPS10        | 55173  | 25.8% | 13.5% | 19.9% | 19.8% |
| FLJ10613      | 54552  | 18.9% | 15.5% | 24.9% | 19.8% |
| GNG11         | 2791   | 18.4% | 13.2% | 27.7% | 19.8% |
| ORSH2         | 79310  | 27.3% | 19.0% | 13.0% | 19.8% |
| CPNE6         | 9362   | 28.3% | 17.4% | 13.7% | 19.8% |
| RALB          | 5899   | 17.4% | 21.1% | 20.8% | 19.8% |
| ZNF384        | 171017 | 20.8% | 15.3% | 23.1% | 19.8% |
| KIFC2         | 90990  | 17.0% | 13.7% | 28.6% | 19.8% |
| LAMB2         | 3913   | 29.2% | 13.6% | 16.6% | 19.8% |
| ACP6          | 51205  | 21.0% | 22.2% | 16.1% | 19.8% |

|               |        |       |       |       |       |
|---------------|--------|-------|-------|-------|-------|
| ACTR10        | 55860  | 20.0% | 24.3% | 15.0% | 19.8% |
| CCT8L2        | 150160 | 26.6% | 11.1% | 21.6% | 19.8% |
| DEDD2         | 162989 | 15.9% | 21.1% | 22.3% | 19.8% |
| TDRD9         | 122402 | 22.2% | 10.3% | 26.8% | 19.8% |
| ATAD2         | 29028  | 24.1% | 15.4% | 19.8% | 19.8% |
| OPN1LW        | 5956   | 18.8% | 24.9% | 15.7% | 19.8% |
| PALM2-AKAP2   | 445815 | 34.9% | 16.5% | 7.9%  | 19.8% |
| DCTN6         | 10671  | 21.2% | 26.3% | 11.8% | 19.8% |
| SYT14L        | 83851  | 15.4% | 13.6% | 30.3% | 19.8% |
| ANXA8         | 244    | 32.7% | 9.7%  | 17.0% | 19.8% |
| COLM          | 342035 | 16.2% | 9.8%  | 33.3% | 19.8% |
| DAPK3         | 1613   | 17.9% | 20.5% | 20.9% | 19.8% |
| HBA1          | 3039   | 12.1% | 26.1% | 21.2% | 19.8% |
| Sep-06        | 23157  | 23.3% | 17.6% | 18.5% | 19.8% |
| SAE1          | 10055  | 20.0% | 15.4% | 23.9% | 19.8% |
| OTOR          | 56914  | 29.9% | 16.8% | 12.7% | 19.8% |
| TH1L          | 51497  | 11.7% | 20.4% | 27.3% | 19.8% |
| TARDBP        | 23435  | 20.5% | 19.0% | 19.9% | 19.8% |
| LOC200933     | 200933 | 25.3% | 13.4% | 20.7% | 19.8% |
| PCDHGC5       | 56097  | 26.6% | 20.3% | 12.4% | 19.8% |
| SOC57         | 30837  | 17.7% | 18.1% | 23.6% | 19.8% |
| OGDH          | 4967   | 27.8% | 13.8% | 17.8% | 19.8% |
| ARID4B        | 51742  | 16.7% | 19.2% | 23.5% | 19.8% |
| FAT           | 2195   | 23.9% | 14.9% | 20.6% | 19.8% |
| LOXL3         | 84695  | 19.9% | 9.1%  | 30.3% | 19.8% |
| DGAT1         | 8694   | 26.5% | 10.9% | 21.9% | 19.8% |
| DKFZP434H2226 | 92255  | 21.5% | 13.9% | 24.0% | 19.8% |
| CHD2          | 1106   | 19.5% | 13.4% | 26.4% | 19.8% |
| FAM31B        | 163486 | 12.4% | 11.6% | 35.4% | 19.8% |
| SIX5          | 147912 | 22.3% | 12.4% | 24.7% | 19.8% |
| PFKFB2        | 5208   | 8.0%  | 25.0% | 26.4% | 19.8% |
| MGC4645       | 79446  | 16.3% | 16.3% | 26.8% | 19.8% |
| FLJ20152      | 54463  | 17.1% | 10.7% | 31.7% | 19.8% |
| SH3BP1        | 23616  | 19.9% | 16.3% | 23.2% | 19.8% |
| BTBD14A       | 138151 | 20.5% | 24.5% | 14.4% | 19.8% |
| CRNN          | 49860  | 29.1% | 14.2% | 16.2% | 19.8% |
| SLC17A2       | 10246  | 23.4% | 26.7% | 9.3%  | 19.8% |
| FLJ38984      | 127703 | 21.8% | 14.3% | 23.3% | 19.8% |
| EXT2          | 2132   | 27.3% | 13.5% | 18.7% | 19.8% |
| LANCL1        | 10314  | 18.0% | 21.6% | 19.8% | 19.8% |
| MGC35097      | 200942 | 20.8% | 12.5% | 26.1% | 19.8% |
| OSBPL3        | 26031  | 22.1% | 20.1% | 17.2% | 19.8% |
| COIL          | 8161   | 32.2% | 11.2% | 16.1% | 19.8% |
| HAND1         | 9421   | 19.9% | 17.9% | 21.7% | 19.8% |
| CENPJ         | 55835  | 26.1% | 11.7% | 21.7% | 19.8% |
| EF2K          | 29904  | 15.6% | 23.8% | 20.1% | 19.8% |
| BRRN1         | 23397  | 18.5% | 13.9% | 27.1% | 19.8% |
| PAR6G         | 84552  | 26.8% | 15.2% | 17.5% | 19.8% |
| KRTHB3        | 3889   | 24.1% | 9.7%  | 25.7% | 19.8% |
| SCGB3A1       | 92304  | 18.4% | 26.3% | 14.8% | 19.8% |
| BACH2         | 60468  | 37.2% | 8.6%  | 13.7% | 19.8% |
| HYOU1         | 10525  | 33.0% | 14.3% | 12.2% | 19.8% |
| TMPPRS11F     | 389208 | 20.2% | 16.4% | 22.9% | 19.8% |
| GABRB3        | 2562   | 33.0% | 9.0%  | 17.6% | 19.8% |
| GT2F2         | 2963   | 23.8% | 18.5% | 17.2% | 19.8% |
| TMEM50A       | 23585  | 13.9% | 19.4% | 26.2% | 19.8% |
| FZD2          | 2535   | 20.3% | 23.4% | 15.8% | 19.8% |
| NUDC          | 10726  | 10.8% | 26.0% | 22.7% | 19.8% |
| LRRC14        | 9684   | 27.9% | 13.1% | 18.5% | 19.8% |
| AKAP5         | 9495   | 36.5% | 7.9%  | 15.0% | 19.8% |
| FAIM2         | 23017  | 18.9% | 18.6% | 22.0% | 19.8% |
| C10ORF47      | 254427 | 21.5% | 23.2% | 14.8% | 19.8% |
| LRP1          | 4035   | 22.6% | 20.1% | 16.8% | 19.8% |
| HOM-TE5-85    | 51213  | 11.5% | 13.3% | 34.7% | 19.8% |
| HTATSF1       | 27336  | 23.3% | 21.1% | 15.2% | 19.8% |
| OR1L1         | 26737  | 16.9% | 19.4% | 23.2% | 19.8% |
| PRAM-1        | 84106  | 9.6%  | 19.9% | 30.0% | 19.8% |
| RGS14         | 10636  | 14.1% | 19.1% | 26.4% | 19.8% |
| FLJ37131      | 286122 | 13.3% | 13.5% | 32.7% | 19.8% |
| CDC25B        | 994    | 13.7% | 27.8% | 18.0% | 19.8% |
| FLJ37562      | 134553 | 18.4% | 12.1% | 29.0% | 19.8% |
| GIF           | 2694   | 14.1% | 23.6% | 21.9% | 19.8% |
| SLC26A3       | 1811   | 22.4% | 15.6% | 21.6% | 19.9% |
| YAF2          | 10138  | 31.5% | 7.4%  | 20.7% | 19.9% |
| SIGLEC10      | 89790  | 26.3% | 17.0% | 16.2% | 19.9% |
| ADAMTS10      | 81794  | 29.3% | 14.6% | 15.6% | 19.9% |
| FKRP          | 79147  | 25.9% | 15.4% | 18.3% | 19.9% |
| TNNI3K        | 51086  | 22.4% | 14.1% | 23.2% | 19.9% |
| STRN4         | 29888  | 19.6% | 19.0% | 21.0% | 19.9% |
| OR51V1        | 283111 | 28.9% | 13.5% | 17.2% | 19.9% |
| GPBAR1        | 151306 | 21.0% | 18.5% | 20.1% | 19.9% |
| HRMT1L4       | 56341  | 14.1% | 22.6% | 22.8% | 19.9% |
| UBXD4         | 165324 | 20.9% | 16.5% | 22.1% | 19.9% |
| TRIB1         | 10221  | 15.5% | 19.8% | 24.3% | 19.9% |
| C10ORF83      | 118812 | 20.0% | 15.8% | 23.8% | 19.9% |
| LOC65121      | 65121  | 22.8% | 10.5% | 26.4% | 19.9% |
| SRC           | 6714   | 15.0% | 23.5% | 21.1% | 19.9% |
| CYP2J2        | 1573   | 15.8% | 19.6% | 24.2% | 19.9% |
| PTPMT1        | 114971 | 16.0% | 23.7% | 19.9% | 19.9% |
| OR2Z1         | 284383 | 24.8% | 19.2% | 15.6% | 19.9% |
| LOC221955     | 221955 | 21.7% | 17.9% | 19.9% | 19.9% |
| ZNF285        | 26974  | 21.1% | 8.0%  | 30.6% | 19.9% |
| CCNE1         | 898    | 22.3% | 5.5%  | 31.8% | 19.9% |
| ASIP          | 434    | 19.5% | 20.6% | 19.5% | 19.9% |
| DPH2L2        | 1802   | 14.5% | 12.0% | 33.1% | 19.9% |
| FLJ13096      | 80067  | 12.3% | 14.9% | 32.4% | 19.9% |
| JAK2          | 3717   | 25.5% | 9.1%  | 25.0% | 19.9% |
| LOC90342      | 90342  | 19.2% | 13.8% | 26.6% | 19.9% |

|               |        |       |       |       |       |
|---------------|--------|-------|-------|-------|-------|
| NELF          | 26012  | 15.0% | 17.5% | 27.1% | 19.9% |
| C20ORF39      | 79953  | 23.6% | 15.8% | 20.2% | 19.9% |
| PRKCM         | 5587   | 26.5% | 14.6% | 18.5% | 19.9% |
| HCFC2         | 29915  | 16.8% | 22.3% | 20.5% | 19.9% |
| HAPLN2        | 60484  | 28.0% | 17.6% | 14.0% | 19.9% |
| CCDC6         | 8030   | 14.2% | 24.2% | 21.3% | 19.9% |
| TMEM16E       | 203859 | 20.9% | 18.6% | 20.2% | 19.9% |
| HADH2         | 3028   | 26.6% | 13.6% | 19.5% | 19.9% |
| ATP1B3        | 483    | 25.9% | 14.7% | 19.0% | 19.9% |
| LRRCS         | 55144  | 25.6% | 17.8% | 16.3% | 19.9% |
| PGM3          | 5238   | 13.6% | 14.1% | 32.0% | 19.9% |
| C21ORF33      | 8209   | 21.6% | 27.4% | 10.6% | 19.9% |
| FRAP1         | 2475   | 26.9% | 21.6% | 11.1% | 19.9% |
| MGC26594      | 403314 | 13.8% | 25.3% | 20.5% | 19.9% |
| HSPC152       | 51504  | 20.6% | 22.1% | 17.0% | 19.9% |
| UPK1A         | 11045  | 20.0% | 15.3% | 24.4% | 19.9% |
| KIAA0922      | 23240  | 38.2% | 11.3% | 10.2% | 19.9% |
| MYO1D         | 4642   | 12.4% | 19.9% | 27.5% | 19.9% |
| C6ORF49       | 29964  | 20.8% | 17.3% | 21.6% | 19.9% |
| FLJ12949      | 65095  | 12.7% | 23.9% | 23.1% | 19.9% |
| RRAS          | 6237   | 23.9% | 16.1% | 19.8% | 19.9% |
| VEGF          | 7422   | 21.1% | 17.2% | 21.4% | 19.9% |
| MGC32020      | 91442  | 19.5% | 16.1% | 24.1% | 19.9% |
| B3GNT7        | 93010  | 22.2% | 15.0% | 22.6% | 19.9% |
| C3ORF4        | 56650  | 15.6% | 11.0% | 33.2% | 19.9% |
| CPB1          | 1360   | 24.7% | 16.2% | 18.8% | 19.9% |
| TSPYL6        | 388951 | 14.8% | 21.1% | 23.9% | 19.9% |
| WBSCR1        | 7458   | 26.3% | 13.5% | 20.0% | 19.9% |
| IFIT5         | 24138  | 17.6% | 12.0% | 30.1% | 19.9% |
| ARHE          | 390    | 23.3% | 17.9% | 18.6% | 19.9% |
| EGFL8         | 80864  | 17.0% | 18.9% | 23.8% | 19.9% |
| ZCWCC1        | 22880  | 10.8% | 9.8%  | 39.2% | 19.9% |
| C7ORF31       | 136895 | 22.3% | 17.4% | 20.1% | 19.9% |
| NPR1          | 4881   | 21.0% | 17.1% | 21.6% | 19.9% |
| SLC12A2       | 6558   | 25.8% | 17.0% | 17.0% | 19.9% |
| ID3           | 3399   | 17.0% | 14.4% | 28.4% | 19.9% |
| MUTYH         | 4595   | 26.5% | 16.8% | 16.5% | 19.9% |
| HSD3B2        | 3284   | 22.3% | 15.4% | 22.2% | 19.9% |
| ZNF512        | 84450  | 18.1% | 16.0% | 25.7% | 19.9% |
| PECR          | 55825  | 33.9% | 13.5% | 12.4% | 19.9% |
| APBB1         | 322    | 27.4% | 11.7% | 20.7% | 19.9% |
| IMAGE:4215339 | 113177 | 16.7% | 7.8%  | 35.3% | 19.9% |
| CHRNA9        | 55584  | 25.3% | 11.2% | 23.3% | 19.9% |
| CHD6          | 84181  | 22.7% | 17.2% | 20.0% | 19.9% |
| ELF5          | 2001   | 30.7% | 10.8% | 18.3% | 19.9% |
| SFRS16        | 11129  | 16.8% | 18.3% | 24.7% | 19.9% |
| KIAA1826      | 84437  | 32.8% | 8.8%  | 18.3% | 20.0% |
| ADRB3         | 155    | 26.0% | 20.0% | 13.8% | 20.0% |
| CUTC          | 51076  | 29.2% | 12.9% | 17.7% | 20.0% |
| LRRC29        | 26231  | 25.8% | 12.7% | 21.4% | 20.0% |
| SP7           | 121340 | 22.0% | 18.2% | 19.6% | 20.0% |
| PEPP2         | 54477  | 29.9% | 12.9% | 17.1% | 20.0% |
| SALL2         | 6297   | 36.5% | 11.5% | 11.8% | 20.0% |
| TXNL4         | 10907  | 32.0% | 4.1%  | 23.8% | 20.0% |
| LOC401498     | 401498 | 28.4% | 18.1% | 13.4% | 20.0% |
| SEC61B        | 10952  | 5.9%  | 30.0% | 24.0% | 20.0% |
| TAC4          | 255061 | 12.1% | 17.3% | 30.5% | 20.0% |
| STK35         | 140901 | 18.6% | 15.5% | 25.7% | 20.0% |
| SLC10A2       | 6555   | 17.8% | 19.0% | 23.1% | 20.0% |
| LOC51693      | 51693  | 17.6% | 8.5%  | 33.8% | 20.0% |
| FLJ23554      | 79864  | 18.5% | 13.0% | 28.4% | 20.0% |
| TNFAIP8       | 25816  | 21.8% | 15.8% | 22.4% | 20.0% |
| IER2          | 9592   | 13.0% | 29.2% | 17.7% | 20.0% |
| MET           | 4233   | 25.6% | 19.9% | 14.5% | 20.0% |
| DLP           | 54957  | 14.1% | 21.9% | 23.9% | 20.0% |
| E46L          | 25814  | 28.1% | 10.2% | 21.6% | 20.0% |
| TFB1M         | 51106  | 22.7% | 23.6% | 13.6% | 20.0% |
| MYBPC2        | 4606   | 17.6% | 19.9% | 22.5% | 20.0% |
| MGC43122      | 151477 | 18.9% | 11.2% | 29.9% | 20.0% |
| SORD          | 6652   | 27.0% | 10.3% | 22.6% | 20.0% |
| LOC128344     | 128344 | 9.5%  | 20.5% | 29.9% | 20.0% |
| APBA3         | 9546   | 25.4% | 10.0% | 24.6% | 20.0% |
| MGC29937      | 123207 | 16.2% | 14.3% | 29.4% | 20.0% |
| KCTD6         | 200845 | 32.1% | 8.9%  | 19.0% | 20.0% |
| FLJ38968      | 120534 | 14.7% | 15.3% | 29.9% | 20.0% |
| FLJ20156      | 54839  | 17.5% | 7.1%  | 35.4% | 20.0% |
| TOR1B         | 27348  | 24.0% | 12.2% | 23.8% | 20.0% |
| MGC3130       | 78995  | 14.9% | 11.5% | 33.6% | 20.0% |
| SRPR          | 6734   | 24.0% | 17.1% | 18.9% | 20.0% |
| DKFZP434H2215 | 54752  | 18.9% | 9.3%  | 31.8% | 20.0% |
| MGC955        | 79078  | 18.1% | 17.1% | 24.8% | 20.0% |
| SLC24A3       | 57419  | 23.5% | 23.3% | 13.2% | 20.0% |
| FLJ20249      | 54865  | 20.8% | 12.8% | 26.4% | 20.0% |
| NPAS3         | 64067  | 26.2% | 18.6% | 15.2% | 20.0% |
| CHIA          | 27159  | 20.3% | 21.7% | 18.0% | 20.0% |
| UBTD1         | 80019  | 19.9% | 20.9% | 19.3% | 20.0% |
| DKFZP451J0118 | 200081 | 19.7% | 11.0% | 29.3% | 20.0% |
| FLJ23469      | 79763  | 26.2% | 16.7% | 17.0% | 20.0% |
| FLJ23657      | 152816 | 8.4%  | 21.7% | 29.9% | 20.0% |
| MT            | 27349  | 26.7% | 23.5% | 9.8%  | 20.0% |
| TOLLIP        | 54472  | 14.4% | 31.5% | 14.1% | 20.0% |
| ULBP1         | 80329  | 22.9% | 20.8% | 16.3% | 20.0% |
| LOC652759     | 652759 | 26.3% | 8.9%  | 24.9% | 20.0% |
| FBLP-1        | 54751  | 10.0% | 50.0% | 0.0%  | 20.0% |
| LOC389151     | 389151 | 35.0% | 0.0%  | 25.0% | 20.0% |
| RHAG          | 6005   | 22.9% | 14.3% | 22.8% | 20.0% |
| BTF3          | 689    | 41.2% | 6.1%  | 12.8% | 20.0% |
| VCX           | 26609  | 30.8% | 17.8% | 11.5% | 20.0% |

|              |           |       |       |       |       |
|--------------|-----------|-------|-------|-------|-------|
| ABCA7        | 10347     | 27.1% | 19.5% | 13.3% | 20.0% |
| FREQ         | 23413     | 21.8% | 16.7% | 21.5% | 20.0% |
| OAZ3         | 51686     | 16.5% | 23.8% | 19.7% | 20.0% |
| CPM          | 1368      | 23.4% | 20.7% | 15.9% | 20.0% |
| FKHL18       | 2307      | 26.5% | 13.0% | 20.5% | 20.0% |
| FLJ23231     | 80149     | 25.3% | 10.2% | 24.6% | 20.0% |
| RGPD1        | 400966    | 12.0% | 27.7% | 20.3% | 20.0% |
| LARGE        | 9215      | 23.2% | 14.4% | 22.4% | 20.0% |
| FUT4         | 2526      | 20.8% | 10.5% | 28.8% | 20.0% |
| FUT8         | 2530      | 25.6% | 11.6% | 22.8% | 20.0% |
| TRIM73       | 375593    | 19.5% | 16.8% | 23.8% | 20.0% |
| RNF166       | 115992    | 22.5% | 16.1% | 21.5% | 20.0% |
| MELK         | 9833      | 20.4% | 17.9% | 21.8% | 20.0% |
| RNF190       | 162333    | 21.6% | 13.2% | 25.3% | 20.0% |
| NXX2-8       | 26257     | 17.1% | 16.0% | 27.0% | 20.0% |
| DKFZP564D172 | 83989     | 17.6% | 15.4% | 27.1% | 20.0% |
| ZNF704       | 619279    | 29.0% | 18.2% | 12.9% | 20.0% |
| POMT1        | 10585     | 21.3% | 18.6% | 20.2% | 20.0% |
| CETN2        | 1069      | 27.1% | 15.2% | 17.7% | 20.0% |
| ZNF79        | 7633      | 0.0%  | 21.1% | 39.0% | 20.0% |
| ID2          | 3398      | 17.7% | 10.4% | 32.0% | 20.0% |
| NRP2         | 8828      | 22.7% | 17.8% | 19.6% | 20.0% |
| CREBBP       | 1387      | 32.2% | 12.4% | 15.5% | 20.0% |
| RAB39        | 54734     | 11.0% | 18.5% | 30.5% | 20.0% |
| KCTD5        | 54442     | 23.6% | 16.4% | 20.1% | 20.0% |
| CTPS2        | 56474     | 28.4% | 12.2% | 19.5% | 20.0% |
| OAZ2         | 4947      | 22.8% | 18.2% | 19.1% | 20.0% |
| ITGB4BP      | 3692      | 23.3% | 16.9% | 20.0% | 20.0% |
| PRKAA1       | 5562      | 16.4% | 17.6% | 26.1% | 20.0% |
| RAB27B       | 5874      | 15.7% | 14.8% | 29.7% | 20.0% |
| SPSB1        | 80176     | 21.8% | 14.3% | 24.0% | 20.0% |
| MARS         | 4141      | 36.1% | 12.6% | 11.4% | 20.0% |
| RNU3IP2      | 9136      | 18.6% | 23.4% | 18.1% | 20.0% |
| ZNF530       | 348327    | 24.2% | 14.4% | 21.6% | 20.0% |
| RP6-166C19.2 | 728090    | 15.7% | 21.0% | 23.4% | 20.0% |
| HS25T1       | 9653      | 30.6% | 15.8% | 13.7% | 20.0% |
| LHX8         | 431707    | 10.1% | 22.4% | 27.6% | 20.1% |
| TADA3L       | 10474     | 24.4% | 12.8% | 22.9% | 20.1% |
| ZNF559       | 84527     | 27.3% | 14.5% | 18.3% | 20.1% |
| PROZ         | 8858      | 28.5% | 10.3% | 21.4% | 20.1% |
| LOC113251    | 113251    | 20.3% | 6.1%  | 33.8% | 20.1% |
| SLC25A2      | 83884     | 30.8% | 8.9%  | 20.5% | 20.1% |
| PBOV1        | 59351     | 30.7% | 13.2% | 16.2% | 20.1% |
| MBTPS2       | 51360     | 24.5% | 12.6% | 23.1% | 20.1% |
| SERPINB6     | 5269      | 23.9% | 17.9% | 18.4% | 20.1% |
| TMC4         | 147798    | 20.3% | 26.5% | 13.4% | 20.1% |
| MGC2744      | 80755     | 23.0% | 21.7% | 15.5% | 20.1% |
| TTYH3        | 80727     | 29.2% | 16.2% | 14.8% | 20.1% |
| FLJ11267     | 56260     | 14.8% | 17.4% | 28.0% | 20.1% |
| CRAMPL1      | 57585     | 15.4% | 26.6% | 18.2% | 20.1% |
| FBXO15       | 201456    | 23.5% | 16.0% | 20.7% | 20.1% |
| LOC152573    | 152573    | 13.0% | 21.1% | 26.1% | 20.1% |
| KIAA0774     | 23281     | 13.3% | 25.3% | 21.6% | 20.1% |
| ZNF233       | 353355    | 19.1% | 25.7% | 15.3% | 20.1% |
| CRHR2        | 1395      | 18.5% | 22.1% | 19.6% | 20.1% |
| FLJ11220     | 54665     | 13.4% | 17.6% | 29.2% | 20.1% |
| HSPB9        | 94086     | 19.1% | 16.8% | 24.3% | 20.1% |
| ATP5H        | 10476     | 24.4% | 13.4% | 22.4% | 20.1% |
| MGC23937     | 139596    | 11.9% | 25.1% | 23.3% | 20.1% |
| POPS         | 51367     | 21.6% | 22.0% | 16.6% | 20.1% |
| GAL          | 51083     | 22.7% | 19.3% | 18.2% | 20.1% |
| LAMB3        | 3914      | 21.5% | 22.3% | 16.5% | 20.1% |
| CST4         | 1472      | 33.7% | 14.9% | 11.7% | 20.1% |
| GP9          | 2815      | 20.4% | 15.8% | 24.0% | 20.1% |
| NMNAT1       | 64802     | 30.9% | 7.6%  | 21.7% | 20.1% |
| EXOSC9       | 5393      | 21.5% | 17.1% | 21.7% | 20.1% |
| TFDP1        | 7027      | 29.8% | 9.3%  | 21.2% | 20.1% |
| HSPG2        | 3339      | 21.4% | 21.3% | 17.6% | 20.1% |
| LAMP1        | 3916      | 27.4% | 16.2% | 16.6% | 20.1% |
| C14ORF126    | 112487    | 30.4% | 15.7% | 14.1% | 20.1% |
| IIMP-2       | 10644     | 23.7% | 13.3% | 23.2% | 20.1% |
| SLC41A3      | 54946     | 20.5% | 21.4% | 18.4% | 20.1% |
| APXL         | 357       | 24.9% | 14.9% | 20.5% | 20.1% |
| TTC15        | 51112     | 32.9% | 17.3% | 10.1% | 20.1% |
| C4ORF15      | 79441     | 23.3% | 16.8% | 20.2% | 20.1% |
| HOBX4        | 3214      | 14.9% | 20.9% | 24.4% | 20.1% |
| LOC390999    | 390999    | 18.4% | 11.5% | 30.4% | 20.1% |
| GALNT1       | 2589      | 32.4% | 9.4%  | 18.5% | 20.1% |
| CSORF11      | 167410    | 16.1% | 19.3% | 24.9% | 20.1% |
| HOXC6        | 3223      | 23.1% | 12.8% | 24.4% | 20.1% |
| LOC100128731 | 100128731 | 10.0% | 27.8% | 22.5% | 20.1% |
| GTPBP3       | 84705     | 20.0% | 13.1% | 27.2% | 20.1% |
| TRPS1        | 7227      | 28.6% | 13.8% | 17.9% | 20.1% |
| LOC221143    | 221143    | 17.8% | 7.0%  | 35.5% | 20.1% |
| ALDH3A1      | 218       | 14.1% | 19.3% | 26.9% | 20.1% |
| SHRM         | 57619     | 16.7% | 11.9% | 31.8% | 20.1% |
| PKFB1        | 5207      | 13.9% | 30.1% | 16.3% | 20.1% |
| LNX1         | 84708     | 30.7% | 11.7% | 17.9% | 20.1% |
| LPI          | 149998    | 25.4% | 15.2% | 19.7% | 20.1% |
| LILRA1       | 11024     | 31.5% | 14.9% | 13.9% | 20.1% |
| TGM3         | 7053      | 35.7% | 12.7% | 11.9% | 20.1% |
| FLJ20619     | 55001     | 22.1% | 18.1% | 20.2% | 20.1% |
| ZNF587       | 84914     | 14.9% | 25.4% | 20.1% | 20.1% |
| MRPS17       | 51373     | 29.7% | 18.6% | 12.0% | 20.1% |
| PBXIP1       | 57326     | 25.3% | 17.9% | 17.2% | 20.1% |
| NIFIE14      | 10430     | 27.0% | 10.6% | 22.8% | 20.1% |
| C10ORF19     | 116461    | 24.8% | 19.5% | 16.1% | 20.1% |
| GALR2        | 8811      | 23.4% | 24.3% | 12.7% | 20.1% |

|              |        |       |       |       |       |
|--------------|--------|-------|-------|-------|-------|
| RP11-413M3.2 | 728489 | 15.4% | 20.1% | 24.9% | 20.1% |
| HK1          | 3098   | 22.7% | 18.0% | 19.6% | 20.1% |
| LOC340745    | 340745 | 13.2% | 18.5% | 28.6% | 20.1% |
| MGC13057     | 84281  | 8.9%  | 27.3% | 24.2% | 20.1% |
| C9ORF96      | 169436 | 19.6% | 23.7% | 17.1% | 20.1% |
| KLK1         | 3816   | 25.9% | 19.2% | 15.3% | 20.1% |
| MXD3         | 83463  | 22.4% | 19.4% | 18.6% | 20.1% |
| FLJ41238     | 285386 | 19.9% | 17.0% | 23.4% | 20.1% |
| HEYL         | 26508  | 30.5% | 8.1%  | 21.8% | 20.1% |
| OR13C2       | 392376 | 33.3% | 4.1%  | 23.0% | 20.1% |
| ATP5O        | 539    | 22.1% | 16.6% | 21.7% | 20.1% |
| IGSF6        | 10261  | 19.5% | 18.4% | 22.5% | 20.1% |
| PPT1         | 5538   | 14.4% | 16.9% | 29.1% | 20.1% |
| ST6GALNAC3   | 256435 | 18.7% | 15.8% | 25.9% | 20.1% |
| HNRPD        | 3184   | 17.9% | 24.1% | 18.4% | 20.1% |
| BRCA1        | 672    | 22.3% | 16.0% | 22.1% | 20.1% |
| DHRX         | 207063 | 18.2% | 16.7% | 25.6% | 20.1% |
| B4GALT3      | 8703   | 25.3% | 19.3% | 15.8% | 20.1% |
| C11ORF8      | 744    | 27.3% | 16.9% | 16.2% | 20.1% |
| CD9          | 928    | 16.9% | 21.9% | 21.6% | 20.1% |
| RHBG         | 57127  | 16.8% | 21.4% | 22.2% | 20.1% |
| GAGED2       | 9503   | 18.6% | 11.5% | 30.3% | 20.1% |
| MGC34805     | 160298 | 17.9% | 13.3% | 29.2% | 20.1% |
| TM4SF11      | 51090  | 27.3% | 14.0% | 19.2% | 20.1% |
| AP2M1        | 1173   | 19.6% | 19.4% | 21.4% | 20.1% |
| SSFA2        | 6744   | 33.3% | 15.4% | 11.7% | 20.1% |
| FANCA        | 2175   | 22.0% | 15.3% | 23.2% | 20.1% |
| TSPY2        | 64591  | 22.8% | 14.3% | 23.4% | 20.1% |
| DGKQ         | 1609   | 20.8% | 20.2% | 19.5% | 20.2% |
| TNFSF13B     | 10673  | 25.8% | 18.4% | 16.2% | 20.2% |
| SOX21        | 11166  | 29.1% | 16.7% | 14.7% | 20.2% |
| NEUROD1      | 4760   | 30.7% | 15.3% | 14.5% | 20.2% |
| ALS2CR8      | 79800  | 23.2% | 18.4% | 18.9% | 20.2% |
| LMNA         | 4000   | 18.8% | 11.8% | 29.9% | 20.2% |
| MBP          | 4155   | 25.5% | 15.8% | 19.2% | 20.2% |
| LOC552891    | 552891 | 17.9% | 29.2% | 13.3% | 20.2% |
| C11ORF30     | 56946  | 19.3% | 19.2% | 22.0% | 20.2% |
| SYT8         | 90019  | 7.4%  | 28.3% | 24.7% | 20.2% |
| MARCN1       | 55016  | 27.3% | 21.4% | 11.8% | 20.2% |
| TRFP         | 9477   | 19.7% | 26.9% | 13.8% | 20.2% |
| JK           | 51347  | 20.9% | 17.8% | 21.8% | 20.2% |
| HS3ST3B1     | 9953   | 20.0% | 18.5% | 22.0% | 20.2% |
| MRPL4        | 51073  | 31.6% | 12.5% | 16.4% | 20.2% |
| IL4          | 3565   | 30.5% | 10.0% | 20.1% | 20.2% |
| C20ORF160    | 140706 | 27.8% | 14.6% | 18.1% | 20.2% |
| COL4A3       | 1285   | 36.5% | 12.5% | 11.5% | 20.2% |
| DCBLD2       | 131566 | 21.4% | 20.4% | 18.7% | 20.2% |
| NFATS        | 10725  | 28.1% | 5.6%  | 26.8% | 20.2% |
| CACH-1       | 134526 | 17.6% | 21.0% | 21.9% | 20.2% |
| FCGRT        | 2217   | 25.7% | 8.8%  | 26.1% | 20.2% |
| MYBL2        | 4605   | 10.5% | 0.0%  | 50.0% | 20.2% |
| REV3L        | 5980   | 24.1% | 16.9% | 19.5% | 20.2% |
| SPAM1        | 6677   | 26.9% | 16.7% | 16.9% | 20.2% |
| NKX2-2       | 4821   | 25.6% | 13.8% | 21.1% | 20.2% |
| FLJ10900     | 55253  | 13.5% | 18.7% | 28.4% | 20.2% |
| C1ORF21      | 81563  | 30.5% | 10.7% | 19.3% | 20.2% |
| LOC440456    | 440456 | 22.7% | 15.8% | 22.1% | 20.2% |
| FLJ21616     | 79618  | 14.7% | 18.2% | 27.6% | 20.2% |
| SR140        | 23350  | 33.0% | 15.3% | 12.2% | 20.2% |
| HELB         | 92797  | 24.0% | 14.2% | 22.4% | 20.2% |
| POLR1A       | 25885  | 23.3% | 24.2% | 13.1% | 20.2% |
| GAS2         | 2620   | 15.7% | 18.8% | 26.1% | 20.2% |
| KCNK1        | 3746   | 22.1% | 14.5% | 24.0% | 20.2% |
| PDE8A        | 5151   | 27.1% | 17.8% | 15.7% | 20.2% |
| C10ORF33     | 84795  | 27.0% | 15.7% | 17.8% | 20.2% |
| SFRS2IP      | 9169   | 18.2% | 19.3% | 23.1% | 20.2% |
| FLJ35119     | 126074 | 16.9% | 11.7% | 31.9% | 20.2% |
| ENPP3        | 5169   | 23.3% | 17.4% | 19.9% | 20.2% |
| CD5          | 921    | 26.9% | 10.9% | 22.8% | 20.2% |
| PDZK1IP1     | 10158  | 17.0% | 22.2% | 21.4% | 20.2% |
| DEFB130      | 245940 | 23.7% | 22.0% | 14.9% | 20.2% |
| MCOLN2       | 255231 | 25.0% | 13.7% | 21.9% | 20.2% |
| TUSC3        | 7991   | 22.5% | 12.2% | 26.0% | 20.2% |
| CCR5         | 1234   | 21.0% | 18.6% | 21.0% | 20.2% |
| LIMS2        | 55679  | 19.3% | 21.1% | 20.3% | 20.2% |
| PAX1         | 5075   | 22.6% | 19.5% | 18.5% | 20.2% |
| GPR54        | 84634  | 23.0% | 17.0% | 20.6% | 20.2% |
| TEX13A       | 56157  | 10.3% | 28.0% | 22.3% | 20.2% |
| MGC16309     | 90506  | 21.3% | 20.4% | 19.0% | 20.2% |
| EPHB6        | 2051   | 23.9% | 13.8% | 23.0% | 20.2% |
| NAP1L1       | 4673   | 15.6% | 21.0% | 24.0% | 20.2% |
| TIEG         | 7071   | 15.2% | 23.7% | 21.8% | 20.2% |
| OR4N5        | 390437 | 21.7% | 25.0% | 13.9% | 20.2% |
| GDAP2        | 54834  | 16.8% | 26.1% | 17.8% | 20.2% |
| DDX11        | 1663   | 22.9% | 14.9% | 22.8% | 20.2% |
| OGT          | 8473   | 24.4% | 13.0% | 23.2% | 20.2% |
| KRT8         | 3856   | 27.8% | 17.2% | 15.6% | 20.2% |
| C1QTNF5      | 114902 | 31.8% | 13.3% | 15.6% | 20.2% |
| CUL5         | 8065   | 22.6% | 13.2% | 24.9% | 20.2% |
| INCA1        | 388324 | 26.8% | 8.7%  | 25.1% | 20.2% |
| UPK3B        | 80761  | 12.9% | 27.3% | 20.5% | 20.2% |
| STAC         | 6769   | 10.7% | 20.8% | 29.2% | 20.2% |
| RPS16        | 6217   | 16.0% | 9.8%  | 34.9% | 20.2% |
| RBM4         | 5936   | 27.4% | 21.4% | 11.9% | 20.2% |
| RPH3A        | 22895  | 24.6% | 17.5% | 18.6% | 20.2% |
| FBXW9        | 84261  | 24.5% | 17.7% | 18.5% | 20.2% |
| COPE         | 11316  | 30.1% | 15.4% | 15.1% | 20.2% |
| TCBA1        | 154215 | 25.7% | 12.6% | 22.3% | 20.2% |

|                |        |       |       |       |       |
|----------------|--------|-------|-------|-------|-------|
| COL23A1        | 91522  | 20.8% | 20.7% | 19.2% | 20.2% |
| TA-KRP         | 84541  | 20.1% | 16.1% | 24.4% | 20.2% |
| SPATC1         | 375686 | 9.2%  | 28.8% | 22.7% | 20.2% |
| CRADD          | 8738   | 33.6% | 10.4% | 16.7% | 20.2% |
| LOC92691       | 92691  | 15.3% | 6.8%  | 38.6% | 20.2% |
| SPTBN2         | 6712   | 20.9% | 22.8% | 17.0% | 20.2% |
| SNRPC          | 6631   | 14.3% | 14.0% | 32.5% | 20.2% |
| GPR143         | 4935   | 28.6% | 17.8% | 14.3% | 20.2% |
| NEK4           | 6787   | 23.5% | 16.5% | 20.8% | 20.2% |
| CKLFSF7        | 112616 | 24.3% | 15.9% | 20.6% | 20.2% |
| MAML2          | 84441  | 25.1% | 12.1% | 23.5% | 20.2% |
| FLJ13611       | 80006  | 18.7% | 17.4% | 24.6% | 20.2% |
| POLR2A         | 5430   | 17.5% | 17.2% | 26.1% | 20.2% |
| NRG1           | 3084   | 23.2% | 15.8% | 21.8% | 20.2% |
| SPATA5         | 166378 | 16.9% | 13.8% | 30.0% | 20.2% |
| MSLN           | 10232  | 21.6% | 14.0% | 25.1% | 20.2% |
| DSCR3          | 10311  | 25.3% | 19.8% | 15.7% | 20.2% |
| FLJ14721       | 84915  | 18.0% | 16.5% | 26.3% | 20.2% |
| TBL1X          | 6907   | 26.1% | 15.5% | 19.2% | 20.2% |
| C20ORF67       | 63935  | 17.1% | 25.4% | 18.2% | 20.2% |
| MAPKAPK2       | 9261   | 10.1% | 29.5% | 21.2% | 20.2% |
| XPO4           | 64328  | 31.0% | 14.3% | 15.5% | 20.2% |
| TIPARP         | 25976  | 26.0% | 17.7% | 17.1% | 20.3% |
| CARD12         | 58484  | 30.9% | 12.7% | 17.1% | 20.3% |
| CPA3           | 1359   | 16.4% | 19.0% | 25.4% | 20.3% |
| MGC26598       | 196477 | 23.6% | 11.9% | 25.3% | 20.3% |
| ADRBK1         | 156    | 16.8% | 22.0% | 22.0% | 20.3% |
| SLC26A4        | 5172   | 28.6% | 9.9%  | 22.3% | 20.3% |
| AARSL          | 57505  | 19.4% | 13.5% | 27.9% | 20.3% |
| C20ORF24       | 55969  | 25.3% | 20.1% | 15.4% | 20.3% |
| FLJ23356       | 84197  | 25.5% | 22.4% | 12.9% | 20.3% |
| PSPC1          | 55269  | 18.2% | 19.1% | 23.6% | 20.3% |
| NCF1           | 653361 | 23.4% | 22.0% | 15.5% | 20.3% |
| FLJ25410       | 124404 | 16.0% | 18.2% | 26.6% | 20.3% |
| TAF1A          | 9015   | 21.6% | 13.4% | 25.8% | 20.3% |
| GSTP1          | 2950   | 33.1% | 13.1% | 14.6% | 20.3% |
| TP53I5         | 338440 | 18.1% | 17.8% | 25.0% | 20.3% |
| PURG           | 29942  | 21.3% | 17.8% | 21.8% | 20.3% |
| S100A11        | 6282   | 16.7% | 27.8% | 16.4% | 20.3% |
| TAF13          | 6884   | 22.4% | 15.0% | 23.5% | 20.3% |
| DCLRE1B        | 64858  | 30.5% | 6.9%  | 23.5% | 20.3% |
| MAP3K4         | 4216   | 19.0% | 23.7% | 18.2% | 20.3% |
| FLJ20366       | 55638  | 26.5% | 20.4% | 14.0% | 20.3% |
| UIP1           | 55559  | 25.4% | 16.9% | 18.5% | 20.3% |
| CDK8           | 1024   | 16.2% | 20.0% | 24.6% | 20.3% |
| TTK            | 7272   | 16.1% | 14.3% | 30.4% | 20.3% |
| CPT1B          | 1375   | 24.6% | 13.9% | 22.4% | 20.3% |
| LOC91272       | 91272  | 28.3% | 18.3% | 14.2% | 20.3% |
| TMSNB          | 11013  | 21.7% | 17.5% | 21.7% | 20.3% |
| CAPON          | 9722   | 20.0% | 10.6% | 30.3% | 20.3% |
| LCE5A          | 254910 | 33.6% | 3.4%  | 23.9% | 20.3% |
| LOC340061      | 340061 | 24.6% | 14.8% | 21.5% | 20.3% |
| DDX52          | 11056  | 20.8% | 19.3% | 20.7% | 20.3% |
| ASB18          | 401036 | 20.9% | 18.9% | 21.1% | 20.3% |
| NOPE           | 57722  | 18.3% | 10.5% | 32.1% | 20.3% |
| C6ORF110       | 55362  | 16.2% | 24.7% | 20.1% | 20.3% |
| TRIM74         | 378108 | 15.7% | 22.6% | 22.7% | 20.3% |
| MRPS7          | 51081  | 27.5% | 16.2% | 17.2% | 20.3% |
| NUP54          | 53371  | 23.4% | 25.0% | 12.5% | 20.3% |
| NHLH1          | 4807   | 20.0% | 23.6% | 17.4% | 20.3% |
| KIF1           | 3833   | 28.6% | 17.2% | 15.2% | 20.3% |
| CP             | 1356   | 22.9% | 19.9% | 18.1% | 20.3% |
| KIAA0310       | 9919   | 21.8% | 24.5% | 14.6% | 20.3% |
| LEPR           | 3953   | 19.6% | 17.2% | 24.1% | 20.3% |
| PRKAR1A        | 5573   | 22.1% | 24.8% | 14.1% | 20.3% |
| KRT16          | 3868   | 34.5% | 6.7%  | 19.7% | 20.3% |
| GDF9           | 2661   | 20.2% | 21.5% | 19.2% | 20.3% |
| SKIV2L         | 6499   | 33.7% | 15.7% | 11.6% | 20.3% |
| GSTA3          | 2940   | 27.0% | 12.7% | 21.2% | 20.3% |
| LOC144501      | 144501 | 20.9% | 12.3% | 27.7% | 20.3% |
| CATSPER3       | 347732 | 23.8% | 14.8% | 22.3% | 20.3% |
| VDP            | 8615   | 15.7% | 19.9% | 25.3% | 20.3% |
| CHRD1          | 91851  | 33.3% | 17.3% | 10.3% | 20.3% |
| NR2F1          | 7025   | 25.3% | 7.5%  | 28.1% | 20.3% |
| LBR            | 3930   | 18.0% | 13.3% | 29.7% | 20.3% |
| ZNF586         | 54807  | 17.7% | 20.1% | 23.2% | 20.3% |
| SPSB2          | 84727  | 22.9% | 24.3% | 13.8% | 20.3% |
| DDIT4L         | 115265 | 22.1% | 14.2% | 24.7% | 20.3% |
| NRG3           | 10718  | 24.4% | 16.1% | 20.5% | 20.3% |
| SIRPB2         | 55423  | 15.5% | 8.3%  | 37.2% | 20.3% |
| CXORF15        | 55787  | 35.9% | 13.3% | 11.8% | 20.3% |
| MGC2477        | 79081  | 6.4%  | 23.3% | 31.3% | 20.3% |
| L3MBTL2        | 83746  | 23.1% | 17.7% | 20.2% | 20.3% |
| USP1           | 7398   | 32.9% | 13.6% | 14.5% | 20.3% |
| NGFRAP1        | 27018  | 29.0% | 13.0% | 19.0% | 20.3% |
| RRAGC          | 64121  | 30.2% | 19.3% | 11.5% | 20.3% |
| GPR6           | 2830   | 22.8% | 15.3% | 22.9% | 20.3% |
| C8ORF23        | 654463 | 22.0% | 10.3% | 28.7% | 20.3% |
| MYO1E          | 4643   | 23.4% | 18.2% | 19.4% | 20.3% |
| DKFZP686A01247 | 22998  | 11.8% | 24.7% | 24.5% | 20.3% |
| KIAA0831       | 22863  | 27.2% | 17.4% | 16.4% | 20.3% |
| PRRG3          | 79057  | 37.5% | 12.1% | 11.4% | 20.3% |
| FLJ35838       | 163479 | 20.0% | 7.7%  | 33.3% | 20.3% |
| RUNX2          | 860    | 21.6% | 26.3% | 13.2% | 20.3% |
| FANCC          | 2176   | 21.7% | 13.2% | 26.1% | 20.3% |
| C14ORF31       | 122786 | 18.1% | 18.1% | 24.8% | 20.3% |
| ZNF490         | 57474  | 21.2% | 21.0% | 18.8% | 20.3% |
| LOC127262      | 127262 | 23.2% | 7.8%  | 30.1% | 20.3% |

|               |        |       |       |       |       |
|---------------|--------|-------|-------|-------|-------|
| NPAS2         | 4862   | 38.0% | 6.6%  | 16.5% | 20.3% |
| KLK6          | 5653   | 22.2% | 13.3% | 25.6% | 20.3% |
| MGC11332      | 84804  | 17.8% | 16.3% | 27.0% | 20.3% |
| SPRN          | 503542 | 25.0% | 8.9%  | 27.1% | 20.3% |
| KCNH4         | 23415  | 26.7% | 16.1% | 18.3% | 20.4% |
| FLJ10514      | 55157  | 16.3% | 8.5%  | 36.2% | 20.4% |
| CD209L        | 10332  | 29.2% | 4.4%  | 27.4% | 20.4% |
| FLJ40121      | 284083 | 16.4% | 7.5%  | 37.1% | 20.4% |
| RP1           | 6101   | 17.6% | 11.1% | 32.4% | 20.4% |
| KIAA1212      | 55704  | 28.8% | 14.9% | 17.4% | 20.4% |
| EXT1          | 2131   | 25.6% | 16.5% | 18.9% | 20.4% |
| KCNN1         | 3780   | 26.3% | 11.0% | 23.8% | 20.4% |
| TNC           | 3371   | 16.7% | 24.4% | 20.0% | 20.4% |
| LYZ           | 4069   | 22.7% | 17.9% | 20.4% | 20.4% |
| LOC388125     | 388125 | 17.4% | 13.5% | 30.2% | 20.4% |
| FLJ12525      | 81887  | 13.7% | 10.1% | 37.3% | 20.4% |
| ORS5D13       | 390142 | 26.1% | 16.5% | 18.5% | 20.4% |
| SNCB          | 6620   | 19.3% | 21.4% | 20.3% | 20.4% |
| C9ORF100      | 84904  | 23.1% | 16.7% | 21.3% | 20.4% |
| UNQ9391       | 203074 | 32.9% | 13.2% | 15.0% | 20.4% |
| MBD3L1        | 85509  | 25.4% | 18.7% | 17.0% | 20.4% |
| TUFT1         | 7286   | 31.2% | 9.5%  | 20.4% | 20.4% |
| GLULD1        | 51557  | 33.0% | 17.1% | 11.0% | 20.4% |
| FLJ22578      | 79922  | 28.4% | 17.0% | 15.7% | 20.4% |
| APOBEC3B      | 9582   | 31.3% | 10.0% | 19.8% | 20.4% |
| SCGF          | 6320   | 29.4% | 11.1% | 20.6% | 20.4% |
| LOC128977     | 128977 | 14.3% | 35.7% | 11.1% | 20.4% |
| MBD5          | 55777  | 15.1% | 14.4% | 31.6% | 20.4% |
| TIGD3         | 220359 | 22.8% | 18.4% | 19.9% | 20.4% |
| SERPINB11     | 89778  | 23.5% | 21.3% | 16.3% | 20.4% |
| TRPM7         | 54822  | 17.2% | 32.0% | 12.0% | 20.4% |
| WDSUB1        | 151525 | 25.0% | 22.2% | 13.9% | 20.4% |
| LOC129531     | 129531 | 19.9% | 9.0%  | 32.2% | 20.4% |
| SEMA4C        | 54910  | 15.6% | 16.4% | 29.2% | 20.4% |
| WISP2         | 8839   | 23.7% | 18.1% | 19.3% | 20.4% |
| FLJ13072      | 91646  | 17.2% | 11.5% | 32.5% | 20.4% |
| CUBN          | 8029   | 33.9% | 9.6%  | 17.7% | 20.4% |
| C21ORF70      | 85395  | 29.5% | 10.7% | 20.9% | 20.4% |
| TNFRSF17      | 608    | 37.3% | 3.8%  | 20.0% | 20.4% |
| BTG3          | 10950  | 21.5% | 23.5% | 16.1% | 20.4% |
| RAD51         | 5888   | 20.6% | 26.5% | 14.1% | 20.4% |
| UROS          | 7390   | 21.2% | 20.0% | 20.0% | 20.4% |
| PRB1          | 5542   | 10.6% | 20.9% | 29.6% | 20.4% |
| OFD1          | 8481   | 27.7% | 14.3% | 19.2% | 20.4% |
| CPLX1         | 10815  | 24.7% | 10.0% | 26.5% | 20.4% |
| FLJ20202      | 54855  | 18.4% | 15.8% | 26.9% | 20.4% |
| BCKDHA        | 593    | 29.7% | 16.3% | 15.1% | 20.4% |
| CRABP1        | 1381   | 27.8% | 15.7% | 17.6% | 20.4% |
| ELF1          | 1997   | 33.1% | 10.4% | 17.7% | 20.4% |
| OR4F16        | 81399  | 12.4% | 22.0% | 26.8% | 20.4% |
| AAMP          | 14     | 21.3% | 13.1% | 26.8% | 20.4% |
| DBN1          | 1627   | 27.6% | 18.1% | 15.5% | 20.4% |
| PAN3          | 255967 | 25.2% | 12.1% | 23.9% | 20.4% |
| SULT1C2       | 27233  | 34.4% | 14.4% | 12.4% | 20.4% |
| EPOR          | 2057   | 21.4% | 17.6% | 22.2% | 20.4% |
| ASB12         | 142689 | 26.4% | 22.3% | 12.5% | 20.4% |
| FLJ36561      | 150248 | 29.8% | 12.9% | 18.5% | 20.4% |
| SIX4          | 51804  | 28.9% | 10.9% | 21.4% | 20.4% |
| STAT1         | 6772   | 19.9% | 23.1% | 18.2% | 20.4% |
| OR6B1         | 135946 | 21.1% | 21.1% | 19.0% | 20.4% |
| TNRC4         | 11189  | 22.8% | 13.5% | 25.0% | 20.4% |
| H41           | 55573  | 22.6% | 20.1% | 18.6% | 20.4% |
| PGM1          | 5236   | 26.9% | 13.0% | 21.3% | 20.4% |
| TMPRSS4       | 56649  | 24.1% | 13.6% | 23.6% | 20.4% |
| DHRS4         | 10901  | 12.9% | 20.9% | 27.4% | 20.4% |
| ETFB          | 2109   | 30.2% | 8.9%  | 22.1% | 20.4% |
| DKFZP586M1120 | 83450  | 19.4% | 19.2% | 22.7% | 20.4% |
| PDZK6         | 27152  | 19.8% | 16.8% | 24.6% | 20.4% |
| CDYL2         | 124359 | 19.0% | 17.7% | 24.6% | 20.4% |
| SIAH2         | 6478   | 15.6% | 29.5% | 16.2% | 20.4% |
| WASL          | 8976   | 19.9% | 23.3% | 18.1% | 20.4% |
| PSG9          | 5678   | 21.3% | 14.0% | 26.0% | 20.4% |
| C10ORF93      | 255352 | 25.2% | 23.5% | 12.6% | 20.4% |
| OIP106        | 22906  | 21.2% | 21.6% | 18.5% | 20.4% |
| DKFZP762A217  | 160335 | 20.9% | 10.1% | 30.3% | 20.4% |
| TNFSF4        | 7292   | 17.7% | 26.2% | 17.4% | 20.4% |
| SCNM1         | 79005  | 18.8% | 28.6% | 14.0% | 20.4% |
| Sep-09        | 10801  | 17.3% | 22.8% | 21.3% | 20.4% |
| IL17RD        | 54756  | 26.7% | 16.5% | 18.2% | 20.4% |
| SOM           | 57822  | 15.7% | 29.1% | 16.4% | 20.4% |
| SLC25A30      | 253512 | 29.1% | 14.8% | 17.4% | 20.4% |
| PMS1          | 5378   | 31.6% | 23.0% | 6.7%  | 20.4% |
| LOC493860     | 493860 | 21.5% | 12.5% | 27.4% | 20.4% |
| SLC29A2       | 3177   | 24.2% | 12.2% | 25.0% | 20.4% |
| RASGEF1A      | 221002 | 25.4% | 9.7%  | 26.1% | 20.4% |
| FLII          | 2314   | 19.0% | 20.9% | 21.3% | 20.4% |
| NAGS          | 162417 | 28.8% | 18.8% | 13.7% | 20.4% |
| NDOR1         | 27158  | 26.3% | 13.7% | 21.4% | 20.4% |
| P2RY10        | 27334  | 19.4% | 24.2% | 17.8% | 20.4% |
| RHOBTB2       | 23221  | 24.1% | 9.1%  | 28.1% | 20.4% |
| CENTG3        | 116988 | 25.0% | 12.0% | 24.4% | 20.5% |
| PDZRN3        | 23024  | 19.0% | 24.5% | 17.9% | 20.5% |
| CMTM1         | 113540 | 15.2% | 21.4% | 24.7% | 20.5% |
| KTN1          | 3895   | 23.6% | 13.5% | 24.3% | 20.5% |
| MGC45441      | 149473 | 26.1% | 13.1% | 22.1% | 20.5% |
| HMGN3         | 9324   | 28.4% | 14.3% | 18.7% | 20.5% |
| LOC440957     | 440957 | 33.3% | 15.6% | 12.4% | 20.5% |
| GPR73         | 10887  | 24.0% | 18.2% | 19.1% | 20.5% |



|             |        |       |       |       |       |
|-------------|--------|-------|-------|-------|-------|
| ATG7        | 10533  | 14.8% | 25.2% | 21.4% | 20.5% |
| GIP         | 2695   | 11.3% | 27.6% | 22.4% | 20.5% |
| MGC24381    | 115939 | 12.4% | 15.6% | 33.3% | 20.5% |
| DNAH8       | 1769   | 26.2% | 14.0% | 21.2% | 20.5% |
| DF          | 1675   | 24.7% | 23.7% | 12.9% | 20.5% |
| KIAA1623    | 57719  | 19.6% | 12.4% | 29.4% | 20.5% |
| MGC11257    | 84310  | 21.2% | 20.0% | 20.2% | 20.5% |
| FLJ12436    | 79714  | 10.1% | 25.9% | 25.3% | 20.5% |
| PPP2R2D     | 55844  | 14.0% | 27.8% | 19.6% | 20.5% |
| WRAP53      | 55135  | 13.4% | 17.5% | 30.5% | 20.5% |
| HSPC063     | 29068  | 14.5% | 8.4%  | 38.6% | 20.5% |
| ZNF189      | 7743   | 10.5% | 26.0% | 25.0% | 20.5% |
| MGC13024    | 93129  | 20.8% | 14.4% | 26.3% | 20.5% |
| P2RY5       | 10161  | 25.6% | 14.1% | 21.7% | 20.5% |
| SLC22A4     | 6583   | 22.3% | 16.7% | 22.5% | 20.5% |
| SOCS4       | 122809 | 19.2% | 21.1% | 21.1% | 20.5% |
| SERPINB10   | 5273   | 21.7% | 15.5% | 24.2% | 20.5% |
| GCAT        | 23464  | 31.7% | 14.2% | 15.5% | 20.5% |
| PRDX5       | 25824  | 26.8% | 19.2% | 15.4% | 20.5% |
| CCL13       | 6357   | 29.8% | 11.4% | 20.2% | 20.5% |
| COX11       | 1353   | 30.1% | 14.0% | 17.3% | 20.5% |
| ZC3HDC7     | 29066  | 16.3% | 11.0% | 34.2% | 20.5% |
| SLIT3       | 6586   | 26.8% | 17.1% | 17.6% | 20.5% |
| SEMA7A      | 8482   | 24.5% | 15.0% | 22.0% | 20.5% |
| LRFN4       | 78999  | 33.3% | 13.7% | 14.4% | 20.5% |
| CCNG2       | 901    | 19.9% | 19.5% | 22.1% | 20.5% |
| PDGFC       | 56034  | 32.0% | 14.6% | 14.9% | 20.5% |
| FLJ10458    | 54475  | 14.2% | 22.0% | 25.3% | 20.5% |
| ATP5J       | 522    | 23.8% | 15.3% | 22.3% | 20.5% |
| ACO1        | 48     | 37.8% | 9.3%  | 14.4% | 20.5% |
| NSE2        | 157638 | 25.2% | 14.7% | 21.7% | 20.5% |
| NAT5        | 51126  | 32.8% | 15.4% | 13.2% | 20.5% |
| MGC50273    | 408029 | 36.6% | 12.1% | 12.8% | 20.5% |
| TSFM        | 10102  | 26.1% | 14.9% | 20.5% | 20.5% |
| LOC284680   | 284680 | 34.3% | 11.7% | 15.6% | 20.5% |
| FLJ35630    | 166379 | 26.0% | 8.1%  | 27.4% | 20.5% |
| PPEF1       | 5475   | 27.3% | 16.0% | 18.2% | 20.5% |
| KA36        | 125115 | 21.1% | 16.6% | 23.9% | 20.5% |
| CYP7A1      | 1581   | 32.4% | 9.4%  | 19.7% | 20.5% |
| MCSR        | 4161   | 18.5% | 24.1% | 19.0% | 20.5% |
| MT1A        | 4489   | 20.8% | 20.5% | 20.2% | 20.5% |
| PDE7A       | 5150   | 24.3% | 10.6% | 26.7% | 20.5% |
| SLC35A3     | 23443  | 34.7% | 9.5%  | 17.3% | 20.5% |
| OR10J5      | 127385 | 16.5% | 20.0% | 25.1% | 20.5% |
| OBP2A       | 29991  | 19.0% | 18.4% | 24.1% | 20.5% |
| KIAA0759    | 23357  | 13.8% | 13.3% | 34.4% | 20.5% |
| PCDHB15     | 56121  | 15.6% | 19.2% | 26.8% | 20.5% |
| SENP1       | 29843  | 20.0% | 21.6% | 19.9% | 20.5% |
| CHRNA2      | 1135   | 28.8% | 6.3%  | 26.5% | 20.5% |
| PP784       | 114932 | 18.4% | 14.9% | 28.3% | 20.5% |
| PCDHB3      | 56132  | 14.9% | 26.3% | 20.5% | 20.5% |
| NXT2        | 55916  | 18.7% | 19.6% | 23.3% | 20.5% |
| NMT1        | 4836   | 16.9% | 17.7% | 27.0% | 20.5% |
| NOVA1       | 4857   | 7.8%  | 21.5% | 32.3% | 20.5% |
| C7ORF26     | 79034  | 19.5% | 17.7% | 24.3% | 20.5% |
| CHRNA1      | 1134   | 20.9% | 20.1% | 20.6% | 20.5% |
| ST8SIA2     | 8128   | 24.4% | 15.1% | 22.0% | 20.5% |
| GPR142      | 350383 | 23.1% | 17.3% | 21.1% | 20.5% |
| CLK1        | 1195   | 22.4% | 20.5% | 18.7% | 20.5% |
| FLJ37118    | 148345 | 19.9% | 15.2% | 26.5% | 20.5% |
| ZA20D1      | 56957  | 26.6% | 13.0% | 22.0% | 20.5% |
| C9ORF64     | 84267  | 28.5% | 24.8% | 8.3%  | 20.5% |
| MECP2       | 4204   | 35.5% | 6.8%  | 19.4% | 20.5% |
| CHGN        | 55790  | 24.4% | 21.9% | 15.3% | 20.5% |
| ARMC3       | 219681 | 19.5% | 19.7% | 22.5% | 20.5% |
| PLAGL2      | 5326   | 27.2% | 16.2% | 18.2% | 20.5% |
| FLJ10647    | 55194  | 14.9% | 14.9% | 31.8% | 20.5% |
| HUMAUAANTIG | 29889  | 21.6% | 23.2% | 16.9% | 20.5% |
| MYCT1       | 80177  | 14.6% | 20.7% | 26.3% | 20.5% |
| AP2S1       | 1175   | 20.1% | 26.4% | 15.1% | 20.5% |
| TRIM47      | 91107  | 26.4% | 17.0% | 18.3% | 20.6% |
| MGC33371    | 143684 | 16.6% | 19.9% | 25.2% | 20.6% |
| RHOD        | 29984  | 23.7% | 24.5% | 13.5% | 20.6% |
| GNB4        | 59345  | 19.0% | 19.3% | 23.4% | 20.6% |
| CXCR3       | 2833   | 27.7% | 15.7% | 18.3% | 20.6% |
| FLJ31413    | 155061 | 17.9% | 21.1% | 22.6% | 20.6% |
| BAT4        | 7918   | 19.7% | 21.7% | 20.3% | 20.6% |
| OPN1MW      | 2652   | 21.2% | 20.7% | 19.8% | 20.6% |
| IFNA4       | 3441   | 15.2% | 26.1% | 20.4% | 20.6% |
| HSRG1       | 22879  | 11.7% | 13.1% | 36.9% | 20.6% |
| RBM21       | 64852  | 14.6% | 12.5% | 34.6% | 20.6% |
| ETAA16      | 54465  | 19.5% | 13.8% | 28.4% | 20.6% |
| GALNT10     | 55568  | 31.4% | 9.3%  | 21.1% | 20.6% |
| ZNF272      | 10794  | 16.6% | 19.4% | 25.7% | 20.6% |
| ITGB6       | 3694   | 19.0% | 17.1% | 25.6% | 20.6% |
| GDDR        | 200504 | 17.4% | 17.5% | 26.8% | 20.6% |
| TBDN100     | 80155  | 24.8% | 15.6% | 21.3% | 20.6% |
| HIST1H3C    | 8352   | 33.5% | 16.5% | 11.7% | 20.6% |
| C20ORF79    | 140856 | 20.5% | 18.4% | 22.8% | 20.6% |
| FLJ39441    | 144108 | 18.7% | 14.8% | 28.2% | 20.6% |
| FBXO42      | 54455  | 25.5% | 19.1% | 17.1% | 20.6% |
| LOC255783   | 255783 | 23.7% | 13.8% | 24.2% | 20.6% |
| APOA1       | 335    | 19.1% | 21.7% | 21.0% | 20.6% |
| NEO1        | 4756   | 20.4% | 20.9% | 20.4% | 20.6% |
| FLJ46831    | 399823 | 18.7% | 14.1% | 28.9% | 20.6% |
| MMRN2       | 79812  | 34.7% | 14.2% | 12.8% | 20.6% |
| WDR40B      | 139170 | 21.4% | 20.8% | 19.5% | 20.6% |
| B3GALT2     | 8707   | 24.9% | 15.0% | 21.9% | 20.6% |

|           |        |       |       |       |       |
|-----------|--------|-------|-------|-------|-------|
| TNR       | 7143   | 25.5% | 16.1% | 20.2% | 20.6% |
| PDEF6G    | 5148   | 33.3% | 6.7%  | 21.7% | 20.6% |
| LOC112714 | 112714 | 20.5% | 9.3%  | 31.9% | 20.6% |
| HSA9947   | 23400  | 26.9% | 14.6% | 20.3% | 20.6% |
| SLC8A1    | 6546   | 32.1% | 7.1%  | 22.6% | 20.6% |
| RHOT2     | 89941  | 29.8% | 13.6% | 18.4% | 20.6% |
| LOC285033 | 285033 | 14.3% | 28.9% | 18.6% | 20.6% |
| LRRC8     | 56262  | 29.4% | 10.9% | 21.4% | 20.6% |
| CACNG1    | 786    | 23.8% | 9.6%  | 28.3% | 20.6% |
| AKAP4     | 8852   | 29.7% | 11.7% | 20.3% | 20.6% |
| ASXL2     | 55252  | 22.3% | 14.7% | 24.8% | 20.6% |
| GSN       | 2934   | 24.0% | 22.1% | 15.7% | 20.6% |
| WFDC1     | 58189  | 20.4% | 16.8% | 24.6% | 20.6% |
| TRPV3     | 162514 | 28.2% | 10.5% | 23.1% | 20.6% |
| DUSP7     | 1849   | 20.8% | 26.3% | 14.7% | 20.6% |
| FLJ10569  | 55174  | 15.1% | 15.4% | 31.3% | 20.6% |
| TAAAR8    | 83551  | 17.6% | 19.9% | 24.2% | 20.6% |
| LASS6     | 253782 | 28.6% | 10.9% | 22.3% | 20.6% |
| FBP2      | 8789   | 16.4% | 30.7% | 14.7% | 20.6% |
| NHLH2     | 4808   | 20.0% | 19.4% | 22.4% | 20.6% |
| PIGO      | 84720  | 28.6% | 12.4% | 20.8% | 20.6% |
| LOC374920 | 374920 | 26.4% | 17.7% | 17.6% | 20.6% |
| ELA3B     | 23436  | 27.0% | 9.9%  | 24.8% | 20.6% |
| SP2       | 6668   | 25.1% | 18.4% | 18.2% | 20.6% |
| CCL26     | 10344  | 24.4% | 19.7% | 17.7% | 20.6% |
| PCOLCE2   | 26577  | 20.0% | 13.3% | 28.5% | 20.6% |
| TTC7A     | 57217  | 11.1% | 8.7%  | 42.0% | 20.6% |
| F2        | 2147   | 21.9% | 17.6% | 22.3% | 20.6% |
| LOC652591 | 652591 | 19.2% | 22.5% | 20.1% | 20.6% |
| MGC26605  | 143471 | 17.1% | 24.3% | 20.4% | 20.6% |
| PFAS      | 5198   | 25.0% | 14.5% | 22.3% | 20.6% |
| FLJ21986  | 79974  | 31.4% | 16.4% | 14.1% | 20.6% |
| KIAA1450  | 96459  | 23.2% | 12.5% | 26.1% | 20.6% |
| ANKRD22   | 118932 | 20.0% | 20.9% | 20.9% | 20.6% |
| MFHAS1    | 9258   | 15.7% | 17.2% | 28.9% | 20.6% |
| OR3A3     | 8392   | 26.0% | 7.6%  | 28.3% | 20.6% |
| SPY1      | 245711 | 20.6% | 16.9% | 24.3% | 20.6% |
| KIAA0690  | 23223  | 10.2% | 28.0% | 23.7% | 20.6% |
| LOC392509 | 392509 | 18.8% | 15.1% | 28.0% | 20.6% |
| C7ORF21   | 83590  | 21.2% | 8.9%  | 31.8% | 20.6% |
| AURKC     | 6795   | 20.1% | 23.5% | 18.2% | 20.6% |
| TRIM68    | 55128  | 27.9% | 10.0% | 23.9% | 20.6% |
| TLP       | 401262 | 8.9%  | 24.9% | 28.1% | 20.6% |
| KIAA0157  | 23172  | 16.6% | 25.1% | 20.2% | 20.6% |
| C1GALT1   | 56913  | 20.6% | 21.4% | 19.9% | 20.6% |
| COX6C     | 1345   | 19.4% | 12.6% | 29.9% | 20.6% |
| WDR13     | 64743  | 23.6% | 21.5% | 16.8% | 20.6% |
| CACNG8    | 59283  | 35.9% | 10.6% | 15.4% | 20.6% |
| SLC8A3    | 6547   | 16.5% | 14.4% | 31.0% | 20.6% |
| MYOCD     | 93649  | 22.7% | 21.2% | 18.0% | 20.6% |
| ATP5L     | 10632  | 21.2% | 25.4% | 15.3% | 20.6% |
| RARS      | 5917   | 20.5% | 18.8% | 22.6% | 20.6% |
| GSTT2     | 2953   | 23.7% | 13.8% | 24.4% | 20.6% |
| FLJ30990  | 150737 | 18.5% | 11.3% | 32.1% | 20.6% |
| EXOC2     | 55770  | 16.4% | 22.8% | 22.7% | 20.6% |
| EST1B     | 23381  | 14.1% | 13.8% | 34.0% | 20.6% |
| HOKA2     | 3199   | 23.7% | 23.4% | 14.8% | 20.6% |
| MGC4251   | 84336  | 26.0% | 9.3%  | 26.6% | 20.6% |
| ZNF143    | 7702   | 16.7% | 25.7% | 19.6% | 20.6% |
| C9ORF158  | 81932  | 37.5% | 18.2% | 6.3%  | 20.6% |
| LTB       | 4050   | 18.3% | 11.8% | 31.8% | 20.6% |
| CAMKK2    | 10645  | 23.6% | 15.9% | 22.5% | 20.6% |
| ZNF396    | 252884 | 21.5% | 16.3% | 24.1% | 20.6% |
| NRP1      | 8829   | 15.7% | 20.6% | 25.7% | 20.7% |
| SLN       | 6588   | 12.3% | 22.6% | 27.0% | 20.7% |
| XPNPEP1   | 7511   | 18.0% | 17.8% | 26.1% | 20.7% |
| MPP6      | 51678  | 31.5% | 15.5% | 14.9% | 20.7% |
| FLJ23518  | 79780  | 19.5% | 5.5%  | 37.0% | 20.7% |
| LOC90321  | 90321  | 20.8% | 20.0% | 21.1% | 20.7% |
| EHHADH    | 1962   | 31.2% | 12.6% | 18.1% | 20.7% |
| PRPF31    | 26121  | 30.0% | 18.2% | 13.8% | 20.7% |
| ENDOG     | 2021   | 28.2% | 14.1% | 19.7% | 20.7% |
| FLJ38507  | 389136 | 20.4% | 17.3% | 24.2% | 20.7% |
| PIP5K3    | 200576 | 23.0% | 16.7% | 22.3% | 20.7% |
| B3GNT1    | 10678  | 21.4% | 18.5% | 22.2% | 20.7% |
| KIAA1712  | 80817  | 26.9% | 18.1% | 16.9% | 20.7% |
| GRIN3B    | 116444 | 22.2% | 16.1% | 23.6% | 20.7% |
| HGFAC     | 3083   | 21.9% | 9.7%  | 30.4% | 20.7% |
| C14ORF156 | 81892  | 24.5% | 22.6% | 14.9% | 20.7% |
| FLJ21069  | 79745  | 22.9% | 10.6% | 28.5% | 20.7% |
| KCNQ4     | 9132   | 28.9% | 16.5% | 16.7% | 20.7% |
| HYPE      | 11153  | 15.1% | 22.2% | 24.7% | 20.7% |
| COL11A1   | 1301   | 32.5% | 11.5% | 17.9% | 20.7% |
| GSTZ1     | 2954   | 30.8% | 15.3% | 15.9% | 20.7% |
| MAST4     | 375449 | 20.1% | 15.9% | 26.0% | 20.7% |
| OVCA2     | 124641 | 18.8% | 18.1% | 25.1% | 20.7% |
| GBP5      | 115362 | 11.8% | 30.1% | 20.1% | 20.7% |
| LAMB4     | 22798  | 23.5% | 18.2% | 20.3% | 20.7% |
| TOPK      | 55872  | 14.2% | 24.5% | 23.3% | 20.7% |
| HIST1H4K  | 8362   | 19.4% | 19.2% | 23.5% | 20.7% |
| ITPKC     | 80271  | 24.4% | 18.5% | 19.2% | 20.7% |
| KIAA1036  | 22846  | 21.0% | 16.3% | 24.8% | 20.7% |
| PCGF2     | 7703   | 19.1% | 19.6% | 23.3% | 20.7% |
| SETD1A    | 9739   | 33.8% | 6.5%  | 21.7% | 20.7% |
| EPHB4     | 2050   | 20.7% | 24.8% | 16.6% | 20.7% |
| ADSSL1    | 122622 | 17.5% | 20.5% | 24.1% | 20.7% |
| CD84      | 8832   | 25.4% | 17.2% | 19.5% | 20.7% |
| C9ORF59   | 286336 | 11.0% | 18.0% | 33.0% | 20.7% |

|           |        |       |       |       |       |
|-----------|--------|-------|-------|-------|-------|
| C9ORF138  | 158297 | 25.0% | 14.4% | 22.7% | 20.7% |
| ZNF394    | 84124  | 20.5% | 19.0% | 22.6% | 20.7% |
| HAT       | 9407   | 22.9% | 24.6% | 14.6% | 20.7% |
| NID67     | 85027  | 24.7% | 15.9% | 21.5% | 20.7% |
| OPTN      | 10133  | 27.2% | 23.7% | 11.2% | 20.7% |
| LOC339834 | 339834 | 11.5% | 17.8% | 32.8% | 20.7% |
| DHX34     | 9704   | 26.7% | 13.4% | 22.0% | 20.7% |
| TSHB      | 7252   | 25.9% | 13.8% | 22.4% | 20.7% |
| FRAG1     | 27315  | 27.3% | 21.4% | 13.4% | 20.7% |
| ABHD9     | 79852  | 24.9% | 12.8% | 24.4% | 20.7% |
| PCDH813   | 56123  | 20.2% | 20.8% | 21.1% | 20.7% |
| CGB5      | 93659  | 20.3% | 25.9% | 15.8% | 20.7% |
| LOC606495 | 606495 | 23.8% | 20.7% | 17.6% | 20.7% |
| SIAT9     | 8869   | 19.4% | 21.1% | 21.6% | 20.7% |
| SDK2      | 54549  | 32.1% | 17.8% | 12.3% | 20.7% |
| HIAN6     | 155038 | 21.0% | 10.7% | 30.4% | 20.7% |
| FLJ13456  | 79699  | 21.0% | 14.9% | 26.2% | 20.7% |
| COX7A2    | 1347   | 17.5% | 23.3% | 21.3% | 20.7% |
| FLJ20436  | 54934  | 28.7% | 10.5% | 23.0% | 20.7% |
| MOSPD1    | 56180  | 31.8% | 14.5% | 15.8% | 20.7% |
| GARNL3    | 84253  | 14.0% | 17.1% | 31.0% | 20.7% |
| CML66     | 84955  | 13.2% | 19.8% | 29.1% | 20.7% |
| SYNGR1    | 9145   | 13.2% | 25.9% | 23.1% | 20.7% |
| UBE2D1    | 7321   | 24.8% | 19.8% | 17.6% | 20.7% |
| CDK10     | 8558   | 12.6% | 21.8% | 27.8% | 20.7% |
| PJA1      | 64219  | 18.4% | 20.5% | 23.3% | 20.7% |
| MGC11386  | 85019  | 23.0% | 12.0% | 27.2% | 20.7% |
| DHX9      | 1660   | 22.2% | 20.2% | 19.7% | 20.7% |
| WDFY2     | 115825 | 26.1% | 22.4% | 13.6% | 20.7% |
| TOMM34    | 10953  | 22.0% | 22.0% | 18.2% | 20.7% |
| ARH       | 26119  | 24.5% | 19.7% | 18.0% | 20.7% |
| GBA2      | 57704  | 22.6% | 16.1% | 23.5% | 20.7% |
| SEC63     | 11231  | 24.6% | 15.8% | 21.7% | 20.7% |
| GPA33     | 10223  | 32.4% | 17.8% | 12.0% | 20.7% |
| KIAA1542  | 57661  | 22.4% | 19.3% | 20.4% | 20.7% |
| SLC5A6    | 8884   | 41.2% | 7.8%  | 13.2% | 20.7% |
| C1orf166  | 79594  | 25.1% | 13.1% | 24.1% | 20.7% |
| DEGS      | 8560   | 26.2% | 14.1% | 21.9% | 20.7% |
| PSME4     | 23198  | 20.3% | 16.5% | 25.4% | 20.7% |
| PDE8B     | 8622   | 28.6% | 20.3% | 13.4% | 20.7% |
| RAD51L3   | 5892   | 32.0% | 12.3% | 17.9% | 20.7% |
| NPR2      | 4882   | 22.4% | 19.5% | 20.3% | 20.7% |
| FLJ11286  | 55337  | 29.2% | 11.8% | 21.3% | 20.7% |
| ZNF576    | 79177  | 18.0% | 20.8% | 23.5% | 20.7% |
| MTRF1     | 9617   | 33.2% | 10.6% | 18.5% | 20.7% |
| GL009     | 84522  | 21.3% | 18.5% | 22.5% | 20.7% |
| MLLT6     | 4302   | 22.9% | 15.8% | 23.6% | 20.7% |
| LOC653978 | 653978 | 27.1% | 14.1% | 21.0% | 20.8% |
| C2ORF7    | 84279  | 25.1% | 17.6% | 19.5% | 20.8% |
| TRIM17    | 51127  | 29.7% | 15.2% | 17.4% | 20.8% |
| MAGEA9    | 4108   | 26.3% | 25.2% | 10.8% | 20.8% |
| STAMBPL1  | 57559  | 31.5% | 11.2% | 19.6% | 20.8% |
| JRAK1     | 3654   | 10.5% | 29.5% | 22.3% | 20.8% |
| SCN2A2    | 6326   | 25.8% | 18.6% | 17.9% | 20.8% |
| ZNF336    | 64412  | 16.6% | 14.4% | 31.3% | 20.8% |
| EHD4      | 30844  | 25.1% | 7.4%  | 29.8% | 20.8% |
| SLITRK4   | 139065 | 28.8% | 11.8% | 21.6% | 20.8% |
| PIWIL1    | 9271   | 21.1% | 18.3% | 22.8% | 20.8% |
| SLC35F3   | 148641 | 24.6% | 18.9% | 18.8% | 20.8% |
| DLAD      | 58511  | 13.9% | 22.9% | 25.4% | 20.8% |
| C14orf145 | 145508 | 35.0% | 15.3% | 11.9% | 20.8% |
| KLRC1     | 3821   | 21.5% | 22.7% | 18.1% | 20.8% |
| RSPRY1    | 89970  | 30.4% | 13.9% | 17.9% | 20.8% |
| XRCC5     | 7520   | 32.5% | 11.1% | 18.6% | 20.8% |
| HRI       | 27102  | 19.7% | 22.4% | 20.2% | 20.8% |
| RAP1GDS1  | 5910   | 23.5% | 13.3% | 25.5% | 20.8% |
| TGOLN2    | 10618  | 22.0% | 15.6% | 24.7% | 20.8% |
| RDH10     | 157506 | 34.8% | 12.5% | 15.0% | 20.8% |
| MIR16     | 51573  | 34.9% | 8.5%  | 18.9% | 20.8% |
| DDX21     | 9188   | 25.3% | 17.0% | 20.0% | 20.8% |
| LOC440836 | 440836 | 28.3% | 17.2% | 16.9% | 20.8% |
| TESSP2    | 339906 | 28.1% | 20.1% | 14.1% | 20.8% |
| TBL1Y     | 90665  | 31.2% | 19.7% | 11.3% | 20.8% |
| SLC2A1    | 6513   | 32.1% | 17.4% | 12.8% | 20.8% |
| ZFP36     | 7538   | 20.5% | 20.3% | 21.6% | 20.8% |
| POLR3F    | 10621  | 35.3% | 21.7% | 5.3%  | 20.8% |
| AKR1C1    | 1645   | 19.0% | 16.7% | 26.6% | 20.8% |
| GASP      | 9737   | 30.2% | 16.9% | 15.2% | 20.8% |
| LOC283951 | 283951 | 13.6% | 19.3% | 29.4% | 20.8% |
| TGDS      | 23483  | 28.6% | 12.1% | 21.6% | 20.8% |
| LOC402644 | 402644 | 25.8% | 20.6% | 16.0% | 20.8% |
| CTS2      | 1522   | 26.8% | 15.4% | 20.1% | 20.8% |
| TMEM2     | 23670  | 27.9% | 17.2% | 17.2% | 20.8% |
| C10ORF80  | 159686 | 17.5% | 19.7% | 25.1% | 20.8% |
| ASS       | 445    | 26.4% | 15.4% | 20.5% | 20.8% |
| ENO2      | 2026   | 25.9% | 21.3% | 15.1% | 20.8% |
| DLC2      | 140735 | 24.6% | 20.5% | 17.3% | 20.8% |
| UBE2O     | 63893  | 29.2% | 10.7% | 22.4% | 20.8% |
| TRPM2     | 7226   | 27.8% | 15.8% | 18.8% | 20.8% |
| C9ORF112  | 92715  | 19.2% | 11.8% | 31.4% | 20.8% |
| DXYS155E  | 8227   | 15.8% | 16.9% | 29.6% | 20.8% |
| LIFR      | 3977   | 31.1% | 13.7% | 17.5% | 20.8% |
| KIAA1219  | 57148  | 20.0% | 17.4% | 24.9% | 20.8% |
| PTHLH     | 5744   | 30.9% | 19.5% | 11.9% | 20.8% |
| PIK3R4    | 30849  | 12.5% | 25.8% | 24.1% | 20.8% |
| PCDHA13   | 56136  | 25.5% | 23.2% | 13.6% | 20.8% |
| MGC39520  | 196472 | 18.3% | 8.7%  | 35.4% | 20.8% |
| EVI2A     | 2123   | 24.4% | 24.4% | 13.6% | 20.8% |

|             |        |       |       |       |       |
|-------------|--------|-------|-------|-------|-------|
| FLJ90579    | 283310 | 16.2% | 8.5%  | 37.6% | 20.8% |
| HLA-DOB     | 3112   | 28.6% | 15.4% | 18.4% | 20.8% |
| SLC4A5      | 57835  | 22.6% | 25.0% | 14.8% | 20.8% |
| LOC134548   | 134548 | 16.4% | 22.4% | 23.6% | 20.8% |
| HSPCO49     | 29062  | 23.7% | 27.0% | 11.7% | 20.8% |
| FLJ10815    | 55238  | 31.0% | 11.6% | 19.8% | 20.8% |
| HRMT1L2     | 3276   | 25.0% | 20.4% | 17.0% | 20.8% |
| C14ORF35    | 122830 | 20.9% | 20.7% | 20.9% | 20.8% |
| NR1D2       | 9975   | 27.2% | 13.0% | 22.2% | 20.8% |
| IHH         | 3549   | 28.9% | 22.1% | 11.4% | 20.8% |
| UBXD1       | 80700  | 26.6% | 8.9%  | 26.9% | 20.8% |
| KCNK10      | 54207  | 21.2% | 11.1% | 30.2% | 20.8% |
| TRIM5       | 85363  | 30.1% | 15.9% | 16.4% | 20.8% |
| LOC286097   | 286097 | 19.6% | 11.3% | 31.6% | 20.8% |
| LOC340595   | 340595 | 22.0% | 7.1%  | 33.3% | 20.8% |
| BAHD1       | 22893  | 22.0% | 15.0% | 25.4% | 20.8% |
| FSCN1       | 6624   | 31.1% | 21.8% | 9.5%  | 20.8% |
| RNF207      | 388591 | 24.3% | 20.4% | 17.7% | 20.8% |
| VTI1B       | 10490  | 29.2% | 15.2% | 18.1% | 20.8% |
| GPR19       | 2842   | 15.3% | 26.9% | 20.2% | 20.8% |
| ODF3        | 113746 | 20.9% | 12.3% | 29.2% | 20.8% |
| MGC26718    | 440482 | 25.9% | 21.4% | 15.1% | 20.8% |
| KCNB2       | 9312   | 29.8% | 6.4%  | 26.2% | 20.8% |
| NAGA        | 4668   | 22.7% | 17.7% | 22.0% | 20.8% |
| OTOA        | 146183 | 24.1% | 20.1% | 18.3% | 20.8% |
| MGC39827    | 160777 | 22.2% | 7.0%  | 33.2% | 20.8% |
| ARHGEF1     | 9138   | 12.8% | 20.6% | 29.1% | 20.8% |
| GPATC1      | 55094  | 20.4% | 13.0% | 29.1% | 20.8% |
| MARVELD3    | 91862  | 26.7% | 19.5% | 16.3% | 20.8% |
| SLC34A2     | 10568  | 21.7% | 17.1% | 23.7% | 20.8% |
| MGC14289    | 92092  | 19.3% | 16.3% | 26.9% | 20.8% |
| SLC18A1     | 6570   | 19.0% | 18.5% | 25.0% | 20.8% |
| FLJ20920    | 80221  | 28.6% | 16.1% | 17.8% | 20.8% |
| D2S448      | 7837   | 20.3% | 15.3% | 26.9% | 20.8% |
| SCN1B       | 6324   | 32.6% | 13.6% | 16.4% | 20.8% |
| CAPS2       | 84698  | 20.5% | 15.8% | 26.2% | 20.8% |
| DAZL        | 1618   | 33.7% | 11.7% | 17.1% | 20.8% |
| SMAP        | 10944  | 16.7% | 16.5% | 29.2% | 20.8% |
| CBX8        | 57332  | 27.1% | 27.3% | 8.0%  | 20.8% |
| PDE3A       | 5139   | 14.5% | 22.5% | 25.5% | 20.8% |
| AACS        | 65985  | 22.0% | 22.1% | 18.4% | 20.8% |
| CETN3       | 1070   | 21.6% | 22.7% | 18.3% | 20.8% |
| MGC11335    | 81577  | 19.3% | 17.6% | 25.6% | 20.8% |
| DOK5L       | 220164 | 17.8% | 5.4%  | 39.2% | 20.8% |
| TNFSF5      | 959    | 18.4% | 22.4% | 21.7% | 20.8% |
| APOL5       | 80831  | 36.7% | 12.6% | 13.2% | 20.8% |
| HNRPF       | 3185   | 24.7% | 14.8% | 23.0% | 20.8% |
| SLC7A10     | 56301  | 17.7% | 25.7% | 19.1% | 20.8% |
| CCNT2       | 905    | 32.3% | 11.3% | 18.9% | 20.8% |
| ULBP3       | 79465  | 18.3% | 23.7% | 20.5% | 20.8% |
| HNRPL1      | 343069 | 20.7% | 21.5% | 20.3% | 20.8% |
| KIF2B       | 84643  | 25.4% | 22.0% | 15.2% | 20.8% |
| ELP4        | 26610  | 28.7% | 7.6%  | 26.2% | 20.8% |
| ENTPD3      | 956    | 17.6% | 28.0% | 16.9% | 20.8% |
| MYO7A       | 4647   | 23.3% | 23.7% | 15.5% | 20.8% |
| GAP43       | 2596   | 21.0% | 25.0% | 16.6% | 20.8% |
| RAPGEF1     | 2889   | 28.2% | 21.4% | 12.9% | 20.8% |
| NOD9        | 79671  | 27.3% | 8.4%  | 26.9% | 20.8% |
| FLJ11795    | 79722  | 20.2% | 17.0% | 25.3% | 20.8% |
| C8ORF4      | 56892  | 17.6% | 19.8% | 25.1% | 20.9% |
| GMFB        | 2764   | 14.5% | 18.9% | 29.1% | 20.9% |
| ANXA3       | 306    | 34.2% | 8.4%  | 20.0% | 20.9% |
| NDEL1       | 81565  | 26.4% | 12.8% | 23.3% | 20.9% |
| RNASE1      | 6035   | 21.5% | 25.2% | 15.9% | 20.9% |
| PCTP        | 58488  | 16.3% | 23.5% | 22.8% | 20.9% |
| GLRA2       | 2742   | 22.5% | 17.7% | 22.4% | 20.9% |
| SRD5A2      | 6716   | 22.1% | 9.0%  | 31.5% | 20.9% |
| C10ORF55    | 414236 | 37.7% | 4.7%  | 20.2% | 20.9% |
| TNRC15      | 26058  | 26.7% | 11.5% | 24.4% | 20.9% |
| OR4N4       | 283694 | 23.3% | 14.7% | 24.5% | 20.9% |
| MARK1       | 4139   | 20.8% | 23.8% | 18.0% | 20.9% |
| ROPN1B      | 152015 | 32.1% | 14.5% | 16.0% | 20.9% |
| GM117       | 148423 | 23.4% | 10.7% | 28.5% | 20.9% |
| HSA277841   | 55421  | 14.0% | 26.0% | 22.6% | 20.9% |
| IL13        | 3596   | 28.4% | 17.6% | 16.5% | 20.9% |
| DKK1        | 22943  | 27.7% | 13.1% | 21.9% | 20.9% |
| RP11-1913.3 | 401541 | 24.4% | 15.3% | 22.9% | 20.9% |
| FLJ35880    | 256076 | 14.7% | 25.2% | 22.7% | 20.9% |
| SPRR4       | 163778 | 29.5% | 16.2% | 16.9% | 20.9% |
| TNFRSF10B   | 8795   | 26.5% | 12.0% | 24.1% | 20.9% |
| BRAP        | 8315   | 26.6% | 17.1% | 18.9% | 20.9% |
| COL9A2      | 1298   | 19.6% | 14.7% | 28.4% | 20.9% |
| ZHX1        | 11244  | 19.6% | 22.5% | 20.6% | 20.9% |
| H2AFB1      | 474382 | 23.1% | 16.0% | 23.5% | 20.9% |
| FBXO9       | 26268  | 22.7% | 15.3% | 24.6% | 20.9% |
| RTN4IP1     | 84816  | 23.2% | 17.3% | 22.1% | 20.9% |
| UXT         | 8409   | 23.8% | 17.9% | 21.0% | 20.9% |
| ZNF625      | 90589  | 17.8% | 18.4% | 26.5% | 20.9% |
| ZNF174      | 7727   | 27.8% | 15.5% | 19.3% | 20.9% |
| LRRCS1      | 220074 | 29.3% | 16.4% | 17.0% | 20.9% |
| OTUB2       | 78990  | 29.7% | 14.8% | 18.2% | 20.9% |
| HRLP5       | 117245 | 18.0% | 14.0% | 30.6% | 20.9% |
| FLJ23751    | 92370  | 21.9% | 19.7% | 21.0% | 20.9% |
| ASCC1       | 51008  | 24.5% | 24.2% | 14.0% | 20.9% |
| PKD1        | 5310   | 30.4% | 15.7% | 16.5% | 20.9% |
| HIST1H3I    | 8354   | 30.4% | 19.8% | 12.5% | 20.9% |
| GGCX        | 2677   | 30.3% | 11.0% | 21.4% | 20.9% |
| KCNV2       | 169522 | 27.8% | 14.4% | 20.5% | 20.9% |

|                 |        |       |       |       |       |
|-----------------|--------|-------|-------|-------|-------|
| FGD6            | 55785  | 22.7% | 20.5% | 19.5% | 20.9% |
| RETN            | 56729  | 27.6% | 14.6% | 20.5% | 20.9% |
| OR6C75          | 390323 | 33.3% | 20.1% | 9.2%  | 20.9% |
| GCNT2           | 2651   | 28.6% | 14.5% | 19.6% | 20.9% |
| DAG1            | 1605   | 21.1% | 16.3% | 25.2% | 20.9% |
| POLDIP3         | 84271  | 13.8% | 14.6% | 34.3% | 20.9% |
| HSA9761         | 27292  | 44.7% | 13.2% | 4.8%  | 20.9% |
| WNT5A           | 7474   | 30.4% | 13.3% | 18.9% | 20.9% |
| LOC401052       | 401052 | 23.4% | 18.9% | 20.4% | 20.9% |
| LOC162427       | 162427 | 11.1% | 29.6% | 22.0% | 20.9% |
| SGCG            | 6445   | 19.1% | 22.7% | 20.9% | 20.9% |
| TBC1D10C        | 374403 | 21.1% | 20.4% | 21.2% | 20.9% |
| ACSL4           | 2182   | 16.3% | 17.5% | 28.9% | 20.9% |
| LOC92312        | 92312  | 30.6% | 15.8% | 16.3% | 20.9% |
| C11ORF24        | 53838  | 27.0% | 19.1% | 16.6% | 20.9% |
| HNRPH2          | 3188   | 29.5% | 17.9% | 15.2% | 20.9% |
| LOC284058       | 284058 | 15.5% | 7.4%  | 39.7% | 20.9% |
| GOPC            | 57120  | 28.6% | 16.2% | 18.0% | 20.9% |
| KIAA0103        | 9694   | 12.1% | 21.0% | 29.6% | 20.9% |
| FADS3           | 3995   | 52.6% | 3.3%  | 6.8%  | 20.9% |
| KIAA1229        | 57489  | 15.0% | 24.3% | 23.4% | 20.9% |
| JTB             | 10899  | 28.7% | 14.6% | 19.4% | 20.9% |
| DNAJA1          | 3301   | 18.7% | 22.1% | 21.9% | 20.9% |
| GOLGA5          | 9950   | 17.7% | 23.9% | 21.1% | 20.9% |
| BICC1           | 80114  | 27.3% | 20.1% | 15.3% | 20.9% |
| NAT1            | 9      | 31.1% | 12.0% | 19.7% | 20.9% |
| ISG20           | 3669   | 18.1% | 18.7% | 25.9% | 20.9% |
| FLJ36198        | 219990 | 21.2% | 18.2% | 23.4% | 20.9% |
| C9ORF23         | 138716 | 20.4% | 19.5% | 22.8% | 20.9% |
| SCNN1B          | 6338   | 24.7% | 8.4%  | 29.6% | 20.9% |
| LPHN3           | 23284  | 20.2% | 22.4% | 20.1% | 20.9% |
| PCOLCE          | 5118   | 31.0% | 2.4%  | 29.4% | 20.9% |
| SLC35B2         | 347734 | 17.5% | 24.0% | 21.2% | 20.9% |
| TH              | 7054   | 32.0% | 17.2% | 13.5% | 20.9% |
| FLJ16478        | 440695 | 29.8% | 15.4% | 17.6% | 20.9% |
| HDGFRP3         | 50810  | 20.3% | 14.7% | 27.8% | 20.9% |
| C6ORF182        | 285753 | 17.6% | 28.2% | 16.9% | 20.9% |
| COQ3            | 51805  | 20.6% | 20.6% | 21.6% | 20.9% |
| ARMC6           | 93436  | 14.3% | 16.7% | 31.8% | 20.9% |
| ORSAK2          | 390181 | 28.5% | 19.0% | 15.2% | 20.9% |
| MAP2            | 4133   | 27.0% | 27.6% | 8.2%  | 20.9% |
| IFNG            | 3458   | 28.4% | 15.3% | 19.1% | 20.9% |
| CEMP1           | 752014 | 26.7% | 14.9% | 21.2% | 20.9% |
| FLJ32499        | 124637 | 16.8% | 15.2% | 30.8% | 20.9% |
| EFNA3           | 1944   | 16.7% | 19.7% | 26.3% | 20.9% |
| PLCG2           | 5336   | 23.8% | 16.5% | 22.5% | 20.9% |
| MRPL34          | 64981  | 16.8% | 20.6% | 25.3% | 20.9% |
| TNFSF12-TNFSF13 | 407977 | 21.7% | 19.3% | 21.8% | 20.9% |
| FLJ20542        | 54973  | 29.1% | 10.0% | 23.7% | 20.9% |
| ATAD1           | 84896  | 20.9% | 10.5% | 31.4% | 20.9% |
| SHD             | 56961  | 13.7% | 25.5% | 23.5% | 20.9% |
| SLC10A3         | 8273   | 22.0% | 18.0% | 22.8% | 20.9% |
| OLR1            | 4973   | 31.5% | 14.3% | 17.0% | 20.9% |
| STMN1           | 3925   | 31.0% | 12.4% | 19.5% | 20.9% |
| LOC83693        | 83693  | 27.0% | 12.1% | 23.7% | 20.9% |
| FLJ37927        | 166979 | 33.7% | 16.2% | 13.0% | 20.9% |
| HDGF            | 3068   | 20.3% | 18.0% | 24.5% | 20.9% |
| RELA            | 5970   | 15.6% | 23.9% | 23.3% | 20.9% |
| LOC159090       | 159090 | 18.3% | 19.5% | 25.0% | 20.9% |
| TTPA            | 7274   | 21.9% | 17.0% | 23.9% | 20.9% |
| PITX2           | 5308   | 24.8% | 14.0% | 24.0% | 20.9% |
| DEK             | 7913   | 23.5% | 19.9% | 19.4% | 20.9% |
| TRPCS           | 7224   | 28.5% | 9.7%  | 24.6% | 20.9% |
| TOE1            | 114034 | 20.6% | 16.8% | 25.4% | 20.9% |
| MGC4707         | 79096  | 12.1% | 13.7% | 37.0% | 20.9% |
| ADRB2           | 154    | 20.7% | 16.6% | 25.5% | 20.9% |
| OPN4            | 94233  | 21.4% | 19.8% | 21.7% | 21.0% |
| FLJ40137        | 124817 | 16.5% | 16.6% | 29.7% | 21.0% |
| TNMD            | 64102  | 19.0% | 23.6% | 20.3% | 21.0% |
| DKFZP434B0335   | 25851  | 24.9% | 16.4% | 21.5% | 21.0% |
| SMARCA3         | 6596   | 29.3% | 21.4% | 12.2% | 21.0% |
| OR2F1           | 26211  | 26.3% | 11.3% | 25.3% | 21.0% |
| GAS8            | 2622   | 24.4% | 16.5% | 22.0% | 21.0% |
| CSK             | 1445   | 17.7% | 16.0% | 29.2% | 21.0% |
| TMPRSS7         | 344805 | 21.1% | 17.6% | 24.2% | 21.0% |
| PAPOLB          | 56903  | 15.3% | 29.6% | 17.9% | 21.0% |
| EGLN3           | 112399 | 22.0% | 15.2% | 25.7% | 21.0% |
| RBMY1B          | 378948 | 23.7% | 17.5% | 21.7% | 21.0% |
| RRAGB           | 10325  | 24.6% | 17.5% | 20.8% | 21.0% |
| C9ORF21         | 195827 | 40.3% | 7.4%  | 15.2% | 21.0% |
| OR2T10          | 127069 | 19.5% | 21.6% | 21.8% | 21.0% |
| TPD52           | 7163   | 15.4% | 25.8% | 21.7% | 21.0% |
| RETNLB          | 84666  | 30.6% | 14.8% | 17.5% | 21.0% |
| FLJ12800        | 64925  | 22.9% | 13.6% | 26.4% | 21.0% |
| SART2           | 29940  | 18.7% | 8.4%  | 35.8% | 21.0% |
| OR10G4          | 390264 | 29.7% | 16.3% | 16.9% | 21.0% |
| SCAMP3          | 10067  | 27.5% | 17.0% | 18.4% | 21.0% |
| GALM            | 130589 | 18.9% | 14.8% | 29.2% | 21.0% |
| FLJ13576        | 64418  | 23.5% | 10.8% | 28.6% | 21.0% |
| FLJ31139        | 285315 | 12.1% | 19.6% | 31.2% | 21.0% |
| SLC25A4         | 291    | 29.6% | 15.7% | 17.6% | 21.0% |
| CAS1            | 64921  | 18.9% | 22.3% | 21.8% | 21.0% |
| ESRRBL1         | 55081  | 19.8% | 13.7% | 29.4% | 21.0% |
| TU3A            | 11170  | 16.5% | 23.8% | 22.6% | 21.0% |
| FLJ13848        | 79829  | 23.0% | 13.9% | 26.0% | 21.0% |
| CTSL            | 1514   | 23.8% | 16.1% | 23.0% | 21.0% |
| ZNF197          | 10168  | 31.1% | 14.5% | 17.4% | 21.0% |
| LCP1            | 3936   | 12.0% | 18.4% | 32.5% | 21.0% |

|              |        |       |       |       |       |
|--------------|--------|-------|-------|-------|-------|
| SLC16A8      | 23539  | 27.2% | 16.7% | 19.1% | 21.0% |
| PIGN         | 23556  | 19.1% | 21.7% | 22.1% | 21.0% |
| TAF1         | 6872   | 12.2% | 25.3% | 25.5% | 21.0% |
| PDHX         | 8050   | 22.6% | 13.5% | 26.9% | 21.0% |
| DEFB112      | 245915 | 16.1% | 24.1% | 22.8% | 21.0% |
| HHEX         | 3087   | 15.4% | 19.8% | 27.8% | 21.0% |
| KIAA1181     | 57222  | 22.0% | 9.9%  | 31.2% | 21.0% |
| NICE-4       | 9898   | 14.9% | 9.2%  | 38.9% | 21.0% |
| PIK3AP1      | 118788 | 20.1% | 20.4% | 22.5% | 21.0% |
| CCNI         | 10983  | 31.1% | 15.3% | 16.7% | 21.0% |
| ALAD         | 210    | 25.8% | 12.3% | 24.9% | 21.0% |
| HIST1H1B     | 3009   | 15.4% | 27.5% | 20.2% | 21.0% |
| LAK          | 80216  | 24.7% | 18.4% | 20.0% | 21.0% |
| MTIF3        | 219402 | 25.9% | 9.1%  | 28.1% | 21.0% |
| KCNB1        | 3745   | 19.3% | 19.0% | 24.8% | 21.0% |
| TAF7L        | 54457  | 22.4% | 19.7% | 21.0% | 21.0% |
| VAMP5        | 10791  | 18.2% | 19.2% | 25.6% | 21.0% |
| ZNF333       | 84449  | 28.6% | 14.2% | 20.3% | 21.0% |
| PP1201       | 64114  | 24.8% | 14.2% | 24.0% | 21.0% |
| GK001        | 57003  | 17.6% | 13.7% | 31.8% | 21.0% |
| C20ORF43     | 51507  | 18.0% | 18.0% | 27.0% | 21.0% |
| PLA2G1B      | 5319   | 20.7% | 20.5% | 21.9% | 21.0% |
| DKFZP761B128 | 144348 | 19.7% | 19.8% | 23.6% | 21.0% |
| UNQ9372      | 388364 | 18.1% | 19.0% | 26.0% | 21.0% |
| IL18         | 3606   | 26.6% | 20.5% | 16.0% | 21.0% |
| FLJ20403     | 284695 | 18.2% | 14.1% | 30.7% | 21.0% |
| SVIL         | 6840   | 34.7% | 9.8%  | 18.6% | 21.0% |
| SLC25A23     | 79085  | 14.4% | 27.6% | 21.1% | 21.0% |
| LOC221710    | 221710 | 26.3% | 18.7% | 18.1% | 21.0% |
| C10ORF111    | 221060 | 44.4% | 5.9%  | 12.8% | 21.0% |
| ALDH1L1      | 10840  | 21.0% | 22.1% | 20.0% | 21.0% |
| PKK4         | 5166   | 18.0% | 23.9% | 21.2% | 21.0% |
| ELOVL5       | 60481  | 18.3% | 17.6% | 27.1% | 21.0% |
| KIAA0514     | 9721   | 19.1% | 16.3% | 27.7% | 21.0% |
| HMMR         | 3161   | 23.7% | 13.7% | 25.8% | 21.0% |
| ARPC4        | 10093  | 25.6% | 18.3% | 19.2% | 21.0% |
| MAT1A        | 4143   | 15.5% | 26.5% | 21.1% | 21.0% |
| FOXO3A       | 2309   | 30.8% | 16.2% | 16.1% | 21.0% |
| FXYD4        | 53828  | 21.6% | 18.2% | 23.4% | 21.0% |
| H2AFY2       | 55506  | 20.0% | 14.7% | 28.4% | 21.0% |
| BCL6         | 604    | 30.8% | 16.6% | 15.8% | 21.0% |
| IER3         | 8870   | 17.1% | 22.4% | 23.6% | 21.0% |
| C14ORF155    | 84075  | 23.0% | 20.9% | 19.3% | 21.0% |
| NXK2-5       | 1482   | 23.9% | 17.7% | 21.5% | 21.0% |
| CHIC1        | 53344  | 24.7% | 14.0% | 24.4% | 21.0% |
| TSN          | 7247   | 19.7% | 19.1% | 24.3% | 21.0% |
| MGC4549      | 84337  | 14.1% | 22.0% | 27.0% | 21.0% |
| DDX39        | 10212  | 25.8% | 19.9% | 17.5% | 21.0% |
| RXR8         | 6257   | 38.5% | 8.0%  | 16.7% | 21.0% |
| LRRN1        | 57633  | 23.6% | 14.2% | 25.4% | 21.0% |
| EDG3         | 1903   | 19.9% | 26.7% | 16.5% | 21.0% |
| LOC346653    | 346653 | 24.4% | 13.3% | 25.4% | 21.0% |
| FLJ11016     | 55285  | 21.4% | 13.0% | 28.7% | 21.0% |
| LOC51252     | 51252  | 30.2% | 13.0% | 19.9% | 21.0% |
| OR1072       | 128360 | 39.9% | 10.9% | 12.4% | 21.0% |
| LOC133957    | 133957 | 17.2% | 15.4% | 30.5% | 21.0% |
| ACPP         | 55     | 14.4% | 33.1% | 15.7% | 21.0% |
| ITIH4        | 3700   | 33.9% | 11.3% | 17.9% | 21.0% |
| FLJ11749     | 79643  | 22.2% | 15.4% | 25.6% | 21.1% |
| MYO1C        | 4641   | 16.7% | 16.8% | 29.7% | 21.1% |
| SEMA4A       | 64218  | 29.2% | 7.4%  | 26.5% | 21.1% |
| FLJ22028     | 79912  | 25.9% | 21.3% | 16.0% | 21.1% |
| MGC35308     | 285800 | 22.2% | 24.7% | 16.2% | 21.1% |
| COMMD7       | 149951 | 16.2% | 26.3% | 20.7% | 21.1% |
| SFI1         | 9814   | 30.4% | 14.1% | 18.6% | 21.1% |
| FNTB         | 2342   | 18.5% | 22.8% | 21.9% | 21.1% |
| MGC35295     | 219995 | 30.4% | 13.0% | 19.8% | 21.1% |
| IDI1         | 3422   | 32.3% | 17.6% | 13.3% | 21.1% |
| RENG         | 85004  | 21.2% | 23.8% | 18.2% | 21.1% |
| OAS2         | 4939   | 34.6% | 12.7% | 15.9% | 21.1% |
| KCNRG        | 283518 | 23.5% | 14.6% | 25.1% | 21.1% |
| CDX1         | 1044   | 32.3% | 16.6% | 14.3% | 21.1% |
| FLJ13725     | 79567  | 16.4% | 10.6% | 36.2% | 21.1% |
| REV1L        | 51455  | 33.3% | 12.4% | 17.4% | 21.1% |
| FLJ23263     | 80185  | 18.6% | 14.8% | 29.9% | 21.1% |
| INSRR        | 3645   | 22.5% | 25.0% | 15.7% | 21.1% |
| EFHD2        | 79180  | 10.3% | 22.0% | 31.0% | 21.1% |
| GPR31        | 2853   | 29.2% | 14.6% | 19.4% | 21.1% |
| ENSA         | 2029   | 23.8% | 13.8% | 25.6% | 21.1% |
| PRND         | 23627  | 38.5% | 12.5% | 12.2% | 21.1% |
| OR2T34       | 127068 | 24.2% | 18.7% | 20.3% | 21.1% |
| MGAT4B       | 11282  | 19.8% | 21.5% | 22.0% | 21.1% |
| PCDH18       | 54510  | 25.5% | 17.4% | 20.3% | 21.1% |
| ADAM11       | 4185   | 22.8% | 16.2% | 24.2% | 21.1% |
| MGC18079     | 146395 | 17.3% | 11.0% | 34.9% | 21.1% |
| NDUF87       | 4713   | 28.7% | 17.7% | 16.8% | 21.1% |
| CARD8        | 22900  | 23.4% | 21.6% | 18.2% | 21.1% |
| OLIG2        | 10215  | 29.4% | 13.9% | 19.9% | 21.1% |
| CPR8         | 9236   | 17.4% | 25.0% | 20.8% | 21.1% |
| HRNR         | 388697 | 27.7% | 21.2% | 14.4% | 21.1% |
| CYP11B1      | 1545   | 26.0% | 15.6% | 21.6% | 21.1% |
| SOC          | 91544  | 25.2% | 14.5% | 23.5% | 21.1% |
| C10ORF10     | 11067  | 20.8% | 18.3% | 24.2% | 21.1% |
| MGC2655      | 79228  | 11.2% | 12.1% | 40.0% | 21.1% |
| DMN          | 23336  | 25.4% | 18.8% | 19.1% | 21.1% |
| FLJ10979     | 55275  | 15.7% | 14.8% | 32.8% | 21.1% |
| OBP2B        | 29989  | 30.4% | 14.5% | 18.4% | 21.1% |
| PIK3R3       | 8503   | 15.4% | 21.0% | 26.9% | 21.1% |

|               |        |       |       |       |       |
|---------------|--------|-------|-------|-------|-------|
| LOC643905     | 643905 | 12.2% | 22.4% | 28.7% | 21.1% |
| DEFB103A      | 55894  | 22.7% | 24.7% | 15.9% | 21.1% |
| KCNG4         | 93107  | 27.3% | 18.7% | 17.3% | 21.1% |
| HMGCR         | 3156   | 32.6% | 9.0%  | 21.7% | 21.1% |
| CHRNA10       | 57053  | 36.8% | 10.7% | 15.7% | 21.1% |
| CACNA2D1      | 781    | 27.8% | 7.7%  | 27.8% | 21.1% |
| CDKN1A        | 1026   | 18.1% | 17.5% | 27.7% | 21.1% |
| MGC45780      | 286133 | 15.1% | 14.8% | 33.4% | 21.1% |
| ADCY4         | 196883 | 18.8% | 14.3% | 30.1% | 21.1% |
| ZNF140        | 7699   | 27.1% | 17.6% | 18.6% | 21.1% |
| LOC643834     | 643834 | 24.8% | 18.6% | 19.9% | 21.1% |
| LOC345651     | 345651 | 21.2% | 16.3% | 25.9% | 21.1% |
| PHACTR1       | 221692 | 23.0% | 21.4% | 18.9% | 21.1% |
| TBPL2         | 387332 | 20.3% | 19.3% | 23.8% | 21.1% |
| PEX6          | 5190   | 20.9% | 28.3% | 14.1% | 21.1% |
| RDH14         | 57665  | 31.3% | 12.5% | 19.6% | 21.1% |
| OR4D1         | 26689  | 18.0% | 19.5% | 25.8% | 21.1% |
| CHD3          | 1107   | 20.4% | 25.5% | 17.4% | 21.1% |
| CPNE1         | 8904   | 18.1% | 14.0% | 31.2% | 21.1% |
| CCBP2         | 1238   | 22.2% | 16.9% | 24.2% | 21.1% |
| LOC147166     | 147166 | 20.3% | 21.0% | 22.1% | 21.1% |
| MTA1          | 9112   | 22.6% | 20.3% | 20.4% | 21.1% |
| ACADL         | 33     | 26.2% | 16.9% | 20.2% | 21.1% |
| C1orf204      | 284677 | 28.0% | 18.9% | 16.4% | 21.1% |
| GIMAP6        | 474344 | 21.5% | 19.7% | 22.1% | 21.1% |
| DKFZP586J0619 | 26173  | 17.8% | 13.1% | 32.4% | 21.1% |
| MGC13102      | 84283  | 17.5% | 13.6% | 32.2% | 21.1% |
| UBE2E3        | 10477  | 29.6% | 7.1%  | 26.6% | 21.1% |
| FLJ31659      | 152756 | 27.0% | 26.7% | 9.6%  | 21.1% |
| GFR3          | 2676   | 27.3% | 14.9% | 21.1% | 21.1% |
| PKD1L2        | 114780 | 31.3% | 11.1% | 21.0% | 21.1% |
| AKTIP         | 64400  | 28.1% | 14.8% | 20.4% | 21.1% |
| NOLA          | 8715   | 27.3% | 18.8% | 17.3% | 21.1% |
| CRSP6         | 9440   | 32.4% | 8.7%  | 22.2% | 21.1% |
| LOC283129     | 283129 | 31.4% | 12.9% | 19.0% | 21.1% |
| GTPBP5        | 26164  | 17.6% | 25.1% | 20.6% | 21.1% |
| SLC6A9        | 6536   | 26.6% | 21.8% | 14.9% | 21.1% |
| CHEK2         | 11200  | 11.6% | 31.8% | 20.0% | 21.1% |
| RFK           | 55312  | 15.0% | 21.6% | 26.8% | 21.1% |
| ABP1          | 26     | 33.5% | 15.3% | 14.6% | 21.1% |
| KIAA0828      | 23382  | 21.9% | 23.4% | 18.1% | 21.1% |
| MRPL24        | 79590  | 22.2% | 15.6% | 25.6% | 21.1% |
| KCNK17        | 89822  | 31.3% | 11.2% | 20.9% | 21.1% |
| DKFZP564J047  | 84066  | 22.9% | 9.9%  | 30.5% | 21.1% |
| RRS1          | 23212  | 27.3% | 14.5% | 21.6% | 21.1% |
| ENPP7         | 339221 | 23.7% | 20.3% | 19.3% | 21.1% |
| ACE2          | 59272  | 26.0% | 21.4% | 16.0% | 21.1% |
| GABRR2        | 2570   | 23.4% | 18.6% | 21.4% | 21.1% |
| ATP5D         | 513    | 25.3% | 21.3% | 16.8% | 21.1% |
| LUC7L         | 55692  | 21.3% | 19.5% | 22.5% | 21.1% |
| SET7          | 80854  | 21.1% | 24.7% | 17.6% | 21.1% |
| MMP28         | 79148  | 35.0% | 13.9% | 14.6% | 21.1% |
| IRF1          | 3659   | 24.8% | 18.7% | 19.9% | 21.1% |
| HOMER3        | 9454   | 16.2% | 24.5% | 22.8% | 21.1% |
| CYFIP1        | 23191  | 26.1% | 13.9% | 23.5% | 21.1% |
| TNIP1         | 10318  | 25.8% | 19.0% | 18.6% | 21.1% |
| MGC04005      | 257415 | 15.1% | 17.2% | 31.1% | 21.1% |
| HSYN          | 55188  | 20.3% | 18.9% | 24.1% | 21.1% |
| NR2C2         | 7182   | 39.5% | 10.4% | 13.5% | 21.1% |
| SGK           | 6446   | 24.2% | 25.2% | 13.9% | 21.1% |
| STC1          | 6781   | 21.6% | 25.1% | 16.7% | 21.1% |
| CXCR6         | 10663  | 22.6% | 26.1% | 14.7% | 21.1% |
| TRIP          | 10293  | 19.1% | 22.8% | 21.5% | 21.1% |
| MESDC1        | 59274  | 24.1% | 25.2% | 14.1% | 21.1% |
| LIPT1         | 51601  | 33.6% | 15.4% | 14.5% | 21.1% |
| TLX3          | 30012  | 22.1% | 19.7% | 21.6% | 21.1% |
| UNQ473        | 284340 | 20.6% | 25.0% | 17.8% | 21.1% |
| GCDH          | 2639   | 34.1% | 12.9% | 16.4% | 21.1% |
| AGC1          | 176    | 20.1% | 13.6% | 29.7% | 21.1% |
| IGSF4B        | 57863  | 18.1% | 14.4% | 31.0% | 21.1% |
| TOMM40        | 10452  | 23.3% | 24.0% | 16.2% | 21.1% |
| CHRN1         | 1140   | 20.7% | 14.3% | 28.4% | 21.1% |
| CBX4          | 8535   | 17.2% | 17.9% | 28.3% | 21.1% |
| CHST5         | 23563  | 11.3% | 24.5% | 27.6% | 21.1% |
| FLJ14624      | 84899  | 17.4% | 18.5% | 27.6% | 21.1% |
| SLITRK2       | 84631  | 28.4% | 17.6% | 17.4% | 21.1% |
| DCUN1D4       | 23142  | 24.3% | 16.9% | 22.3% | 21.1% |
| TPMT          | 7172   | 20.9% | 12.2% | 30.4% | 21.1% |
| CCL5          | 6352   | 21.0% | 27.3% | 15.1% | 21.1% |
| LOC132430     | 132430 | 15.9% | 23.7% | 23.9% | 21.2% |
| RBM14         | 10432  | 24.2% | 13.0% | 26.3% | 21.2% |
| TRIB2         | 28951  | 15.4% | 25.4% | 22.7% | 21.2% |
| DUSP2         | 1844   | 25.5% | 24.2% | 13.8% | 21.2% |
| PLTP          | 5360   | 22.2% | 18.2% | 23.0% | 21.2% |
| MARCH2        | 51257  | 17.5% | 21.0% | 25.0% | 21.2% |
| GAA           | 2548   | 11.7% | 24.7% | 27.0% | 21.2% |
| TRPC6         | 7225   | 27.5% | 17.8% | 18.2% | 21.2% |
| ETV5          | 2119   | 34.6% | 12.7% | 16.2% | 21.2% |
| PP1665        | 81544  | 25.9% | 11.0% | 26.6% | 21.2% |
| FLJ45537      | 401535 | 32.8% | 17.8% | 12.8% | 21.2% |
| SLC20A2       | 6575   | 28.2% | 12.5% | 22.8% | 21.2% |
| TIMM8A        | 1678   | 20.9% | 20.0% | 22.6% | 21.2% |
| MPPE1         | 65258  | 21.4% | 19.7% | 22.4% | 21.2% |
| MGC33630      | 144406 | 19.9% | 10.2% | 33.3% | 21.2% |
| SFMBT1        | 51460  | 14.6% | 18.7% | 30.2% | 21.2% |
| FLJ14966      | 84953  | 33.3% | 4.3%  | 25.8% | 21.2% |
| SSH3          | 54961  | 18.6% | 29.4% | 15.5% | 21.2% |
| DSCR5         | 51227  | 15.8% | 13.5% | 34.2% | 21.2% |

|           |        |       |       |       |       |
|-----------|--------|-------|-------|-------|-------|
| KIAA1305  | 57523  | 15.6% | 20.3% | 27.5% | 21.2% |
| ZNF9      | 7555   | 24.7% | 16.2% | 22.6% | 21.2% |
| C7ORF20   | 51608  | 17.8% | 25.0% | 20.7% | 21.2% |
| C20ORF19  | 55857  | 14.8% | 18.8% | 29.9% | 21.2% |
| HSPC129   | 51496  | 18.2% | 15.5% | 29.8% | 21.2% |
| CRYL1     | 51084  | 23.6% | 25.8% | 14.1% | 21.2% |
| DDX25     | 29118  | 21.3% | 22.5% | 19.8% | 21.2% |
| NXF3      | 56000  | 21.5% | 20.8% | 21.2% | 21.2% |
| LACE1     | 246269 | 28.4% | 14.0% | 21.2% | 21.2% |
| LASP1     | 3927   | 16.9% | 24.4% | 22.2% | 21.2% |
| ACTL7A    | 10881  | 21.6% | 19.2% | 22.8% | 21.2% |
| SCAMP5    | 192683 | 17.0% | 17.0% | 29.5% | 21.2% |
| PODXL     | 5420   | 12.9% | 17.7% | 32.9% | 21.2% |
| ZNF35     | 7584   | 27.9% | 14.7% | 20.9% | 21.2% |
| FLJ22729  | 79736  | 24.9% | 9.8%  | 28.8% | 21.2% |
| NEUROD2   | 4761   | 36.9% | 12.0% | 14.6% | 21.2% |
| CTSF      | 8722   | 29.7% | 12.4% | 21.4% | 21.2% |
| BXMAS2-10 | 219970 | 30.3% | 17.0% | 16.2% | 21.2% |
| PTD015    | 28971  | 13.0% | 14.2% | 36.4% | 21.2% |
| SPRR2G    | 6706   | 23.5% | 25.6% | 14.4% | 21.2% |
| SUV420H1  | 51111  | 29.5% | 14.5% | 19.6% | 21.2% |
| CCL28     | 56477  | 31.3% | 14.1% | 18.2% | 21.2% |
| PFS2      | 51659  | 26.5% | 7.1%  | 30.0% | 21.2% |
| KCNMB4    | 27345  | 23.4% | 19.9% | 20.3% | 21.2% |
| MBD1      | 4152   | 36.8% | 10.9% | 15.9% | 21.2% |
| KLHL13    | 90293  | 12.8% | 28.3% | 22.5% | 21.2% |
| A4GALT    | 53947  | 23.4% | 20.5% | 19.7% | 21.2% |
| CIZ1      | 25792  | 31.4% | 13.6% | 18.5% | 21.2% |
| CGI-04    | 51067  | 12.9% | 26.3% | 24.4% | 21.2% |
| OR12D3    | 81797  | 28.4% | 11.9% | 23.2% | 21.2% |
| ANXA10    | 11199  | 23.1% | 27.0% | 13.6% | 21.2% |
| CYP2F1    | 1572   | 37.2% | 11.1% | 15.3% | 21.2% |
| GAS2L1    | 10634  | 26.4% | 21.7% | 15.4% | 21.2% |
| ADCY6     | 112    | 17.6% | 23.0% | 23.0% | 21.2% |
| FLJ21439  | 80208  | 24.2% | 12.0% | 27.5% | 21.2% |
| CRAT      | 1384   | 18.6% | 26.6% | 18.5% | 21.2% |
| AP4M1     | 9179   | 18.5% | 16.3% | 28.9% | 21.2% |
| KLF15     | 28999  | 30.5% | 9.5%  | 23.7% | 21.2% |
| SPTLC1    | 10558  | 31.3% | 17.5% | 14.8% | 21.2% |
| DEFB128   | 245939 | 18.4% | 19.1% | 26.0% | 21.2% |
| PLXND1    | 23129  | 20.0% | 17.3% | 26.3% | 21.2% |
| TPRT      | 23590  | 27.6% | 22.5% | 13.5% | 21.2% |
| KIAA0082  | 23070  | 15.8% | 30.9% | 16.9% | 21.2% |
| CTGLF3    | 414189 | 22.0% | 13.1% | 28.5% | 21.2% |
| MGC52010  | 91582  | 26.0% | 14.1% | 23.5% | 21.2% |
| GPX7      | 2882   | 17.0% | 20.2% | 26.4% | 21.2% |
| CAM-KIIN  | 94032  | 19.8% | 16.7% | 27.2% | 21.2% |
| SLC6A11   | 6538   | 25.6% | 17.5% | 20.5% | 21.2% |
| OPCML     | 4978   | 32.4% | 7.9%  | 23.3% | 21.2% |
| BBOX1     | 8424   | 29.9% | 10.8% | 22.9% | 21.2% |
| TM4SF20   | 79853  | 23.3% | 20.4% | 19.9% | 21.2% |
| TIRAP     | 114609 | 22.5% | 13.0% | 28.2% | 21.2% |
| BCAP29    | 55973  | 15.9% | 24.1% | 23.6% | 21.2% |
| WFDC11    | 259239 | 18.2% | 18.5% | 26.9% | 21.2% |
| CASP14    | 23581  | 26.8% | 23.1% | 13.7% | 21.2% |
| UNQ501    | 374882 | 35.0% | 12.8% | 15.9% | 21.2% |
| ARHGAP1   | 392    | 26.1% | 15.9% | 21.7% | 21.2% |
| FLJ35155  | 152002 | 13.6% | 20.4% | 29.6% | 21.2% |
| POU5F1    | 5460   | 29.3% | 9.3%  | 25.0% | 21.2% |
| RASSF5    | 83593  | 18.8% | 23.3% | 21.6% | 21.2% |
| SMAP1     | 60682  | 33.1% | 13.0% | 17.6% | 21.2% |
| FLJ25449  | 151649 | 19.5% | 25.9% | 18.2% | 21.2% |
| MGC39662  | 131831 | 19.6% | 14.2% | 29.9% | 21.2% |
| RPIB9     | 154661 | 18.1% | 26.8% | 18.8% | 21.2% |
| TOMM70A   | 9868   | 21.0% | 24.2% | 18.5% | 21.2% |
| SNX25     | 83891  | 25.5% | 11.0% | 27.1% | 21.2% |
| C14ORF37  | 145407 | 15.3% | 19.9% | 28.4% | 21.2% |
| MGC4767   | 84274  | 18.8% | 23.0% | 21.9% | 21.2% |
| LOC339896 | 339896 | 32.1% | 12.6% | 19.0% | 21.2% |
| FLJ11301  | 55341  | 21.0% | 11.8% | 30.9% | 21.2% |
| MLR1      | 254251 | 22.9% | 12.5% | 28.3% | 21.2% |
| C21ORF29  | 54084  | 29.9% | 16.4% | 17.4% | 21.2% |
| STIM2     | 57620  | 17.9% | 20.2% | 25.6% | 21.2% |
| MYO18B    | 84700  | 26.5% | 16.7% | 20.5% | 21.2% |
| BAX       | 581    | 36.1% | 11.8% | 15.8% | 21.2% |
| FLJ45744  | 388531 | 10.7% | 16.7% | 36.2% | 21.2% |
| ZPBP      | 11055  | 19.8% | 18.6% | 25.3% | 21.2% |
| MGC3040   | 66000  | 15.4% | 8.3%  | 40.0% | 21.2% |
| FLJ13910  | 64795  | 14.7% | 18.8% | 30.3% | 21.2% |
| TWIST2    | 117581 | 37.5% | 8.0%  | 18.2% | 21.2% |
| CKLFSF2   | 146225 | 22.3% | 14.4% | 27.0% | 21.2% |
| LOC339168 | 339168 | 15.9% | 19.3% | 28.5% | 21.2% |
| ABCF2     | 10061  | 23.7% | 21.2% | 18.9% | 21.2% |
| FLJ38190  | 123591 | 15.7% | 7.5%  | 40.5% | 21.2% |
| VWF       | 7450   | 19.9% | 17.2% | 26.6% | 21.2% |
| CRA       | 10903  | 23.3% | 13.8% | 26.6% | 21.2% |
| LANCL2    | 55915  | 31.3% | 16.7% | 15.8% | 21.2% |
| ING3      | 54556  | 23.0% | 15.8% | 25.0% | 21.2% |
| EREG      | 2069   | 26.9% | 21.0% | 15.9% | 21.2% |
| HAGHL     | 84264  | 37.0% | 4.8%  | 21.9% | 21.2% |
| CDC23     | 8697   | 30.2% | 9.1%  | 24.4% | 21.2% |
| FZD4      | 8322   | 27.5% | 20.0% | 16.3% | 21.3% |
| RDH11     | 51109  | 29.9% | 16.6% | 17.2% | 21.3% |
| ZNF629    | 23361  | 16.7% | 28.8% | 18.3% | 21.3% |
| SARA1     | 56681  | 20.9% | 13.8% | 29.0% | 21.3% |
| FLJ11323  | 55344  | 27.1% | 18.1% | 18.6% | 21.3% |
| ORGF1     | 343169 | 27.3% | 13.2% | 23.2% | 21.3% |
| CLU10S    | 574016 | 18.1% | 24.1% | 21.6% | 21.3% |



|              |        |       |       |       |       |
|--------------|--------|-------|-------|-------|-------|
| OR13C8       | 138802 | 17.1% | 23.8% | 22.9% | 21.3% |
| VRK3         | 51231  | 22.8% | 21.6% | 19.4% | 21.3% |
| CREB3L3      | 84699  | 27.7% | 14.1% | 21.9% | 21.3% |
| C21ORF91     | 54149  | 36.1% | 12.0% | 15.7% | 21.3% |
| FLJ39827     | 139285 | 21.6% | 17.1% | 25.1% | 21.3% |
| LOC135935    | 135935 | 19.5% | 12.5% | 31.8% | 21.3% |
| FLJ22635     | 80162  | 22.6% | 19.6% | 21.6% | 21.3% |
| MASP1        | 5648   | 32.6% | 13.1% | 18.1% | 21.3% |
| CDY2         | 9426   | 26.9% | 17.9% | 19.0% | 21.3% |
| SBZF3        | 57116  | 21.5% | 10.9% | 31.4% | 21.3% |
| EXTL1        | 2134   | 25.1% | 16.8% | 21.9% | 21.3% |
| FLJ31842     | 148534 | 21.9% | 14.2% | 27.7% | 21.3% |
| GOLGA6       | 55889  | 19.0% | 20.4% | 24.4% | 21.3% |
| PPIH         | 10465  | 27.9% | 13.4% | 22.5% | 21.3% |
| BAG4         | 9530   | 19.8% | 14.1% | 30.0% | 21.3% |
| AMOT         | 154796 | 36.3% | 11.6% | 16.0% | 21.3% |
| TNF          | 7124   | 34.2% | 15.7% | 13.9% | 21.3% |
| CTLA4        | 1493   | 27.6% | 20.1% | 16.1% | 21.3% |
| NOSTRIN      | 115677 | 27.0% | 21.9% | 14.9% | 21.3% |
| TRAPP6B      | 122553 | 19.1% | 23.5% | 21.2% | 21.3% |
| DDX58        | 23586  | 26.1% | 11.1% | 26.7% | 21.3% |
| C16ORF3      | 750    | 15.7% | 20.2% | 27.9% | 21.3% |
| PF4          | 5196   | 25.8% | 13.2% | 24.8% | 21.3% |
| CLIC2        | 1193   | 27.8% | 12.1% | 23.9% | 21.3% |
| H2-ALPHA     | 113457 | 17.5% | 22.8% | 23.6% | 21.3% |
| UBE2I        | 7329   | 26.1% | 21.9% | 15.8% | 21.3% |
| GAB3         | 139716 | 46.3% | 0.0%  | 17.5% | 21.3% |
| MKRN1        | 23608  | 20.6% | 22.3% | 20.9% | 21.3% |
| KIAA1729     | 85460  | 16.6% | 19.5% | 27.7% | 21.3% |
| LARS2        | 23395  | 23.4% | 11.4% | 29.1% | 21.3% |
| ZNF382       | 84911  | 14.2% | 29.5% | 20.2% | 21.3% |
| C21ORF6      | 10069  | 23.8% | 17.9% | 22.2% | 21.3% |
| KIAA2026     | 158358 | 21.3% | 9.9%  | 32.7% | 21.3% |
| SRD5A2L2     | 253017 | 23.3% | 28.0% | 12.6% | 21.3% |
| MGC26744     | 132989 | 16.1% | 18.8% | 29.0% | 21.3% |
| FLJ39237     | 375607 | 20.6% | 17.9% | 25.4% | 21.3% |
| MGC5508      | 79073  | 19.4% | 14.3% | 30.2% | 21.3% |
| HSPC128      | 29080  | 19.7% | 17.7% | 26.4% | 21.3% |
| SLC41A2      | 84102  | 29.4% | 22.0% | 12.4% | 21.3% |
| KRTAP13-1    | 140258 | 37.0% | 16.0% | 11.0% | 21.3% |
| MGC26710     | 150280 | 25.9% | 13.8% | 24.2% | 21.3% |
| C6orf58      | 352999 | 16.8% | 18.0% | 29.1% | 21.3% |
| STH          | 246744 | 15.8% | 21.4% | 26.7% | 21.3% |
| MORF4L2      | 9643   | 17.7% | 32.1% | 14.1% | 21.3% |
| IL1F7        | 27178  | 15.1% | 13.2% | 35.6% | 21.3% |
| TXN2         | 25828  | 30.9% | 15.9% | 17.1% | 21.3% |
| GPR7         | 2831   | 18.8% | 16.4% | 28.6% | 21.3% |
| ZFP95        | 23660  | 26.3% | 13.1% | 24.5% | 21.3% |
| MCM6         | 4175   | 21.7% | 20.7% | 21.5% | 21.3% |
| PLCL4        | 9651   | 32.0% | 11.4% | 20.5% | 21.3% |
| EPIM         | 2054   | 32.7% | 11.7% | 19.6% | 21.3% |
| IRS1         | 3667   | 31.0% | 20.4% | 12.5% | 21.3% |
| MESP2        | 145873 | 32.8% | 16.8% | 14.3% | 21.3% |
| TFF1         | 7031   | 26.3% | 14.0% | 23.7% | 21.3% |
| FLJ45530     | 400555 | 14.3% | 28.6% | 21.1% | 21.3% |
| RASGEF1C     | 255426 | 37.1% | 9.7%  | 17.1% | 21.3% |
| FLJ13479     | 79759  | 26.5% | 13.1% | 24.3% | 21.3% |
| ERVWE1       | 30816  | 15.3% | 20.2% | 28.5% | 21.3% |
| ELA1         | 1990   | 20.6% | 18.8% | 24.5% | 21.3% |
| SILV         | 6490   | 27.3% | 20.9% | 15.7% | 21.3% |
| TNFRSF10D    | 8793   | 29.2% | 16.5% | 18.3% | 21.3% |
| C2F          | 10436  | 22.8% | 16.7% | 24.5% | 21.3% |
| FLJ14981     | 84954  | 17.8% | 14.5% | 31.6% | 21.3% |
| VAC14        | 55697  | 20.5% | 13.8% | 29.7% | 21.3% |
| GSG1         | 83445  | 14.7% | 26.4% | 22.9% | 21.3% |
| MGC41943     | 340307 | 29.1% | 18.5% | 16.4% | 21.3% |
| ORS1B6       | 390058 | 16.4% | 17.0% | 30.5% | 21.3% |
| DKFZP5641122 | 25974  | 15.9% | 13.9% | 34.2% | 21.3% |
| VG5Q         | 55109  | 25.3% | 15.5% | 23.1% | 21.3% |
| RAMP1        | 10267  | 23.0% | 29.3% | 11.7% | 21.3% |
| CLCN2        | 1181   | 22.2% | 14.2% | 27.6% | 21.3% |
| C10ORF72     | 196740 | 27.4% | 20.7% | 15.8% | 21.3% |
| LOC55954     | 55954  | 21.9% | 9.0%  | 33.1% | 21.3% |
| FLJ11342     | 55347  | 12.3% | 18.5% | 33.2% | 21.3% |
| PNRC2        | 55629  | 26.2% | 22.3% | 15.5% | 21.3% |
| SPATA6       | 54558  | 21.8% | 20.0% | 22.2% | 21.3% |
| LOC285016    | 285016 | 21.9% | 5.0%  | 37.0% | 21.3% |
| KCNG2        | 26251  | 13.3% | 20.0% | 30.6% | 21.3% |
| APOBEC3G     | 60489  | 32.7% | 15.0% | 16.3% | 21.3% |
| DBI          | 1622   | 17.7% | 19.7% | 26.6% | 21.3% |
| ANKRD1       | 27063  | 34.3% | 10.8% | 18.8% | 21.3% |
| GRID1        | 2894   | 24.7% | 10.7% | 28.6% | 21.3% |
| GALNT7       | 51809  | 38.9% | 7.5%  | 17.5% | 21.3% |
| LOC151963    | 151963 | 19.6% | 6.6%  | 37.8% | 21.3% |
| C10ORF38     | 221061 | 28.0% | 15.5% | 20.4% | 21.3% |
| PDC          | 5132   | 27.3% | 10.8% | 25.8% | 21.3% |
| MGC20579     | 348013 | 20.9% | 13.2% | 29.9% | 21.3% |
| TUBB         | 7280   | 41.3% | 3.5%  | 19.2% | 21.3% |
| LPHN2        | 23266  | 16.9% | 19.4% | 27.7% | 21.3% |
| LOC90313     | 90313  | 23.9% | 13.2% | 26.9% | 21.3% |
| CORO2B       | 10391  | 21.8% | 19.9% | 22.3% | 21.3% |
| T1A-2        | 10630  | 18.8% | 6.7%  | 38.6% | 21.3% |
| CFL1         | 1072   | 14.3% | 27.4% | 22.3% | 21.3% |
| HCG3         | 414061 | 32.8% | 20.1% | 11.1% | 21.3% |
| LOC51321     | 51321  | 26.5% | 9.2%  | 28.3% | 21.3% |
| C14ORF21     | 161424 | 19.5% | 26.9% | 17.6% | 21.3% |
| STAT5B       | 6777   | 36.2% | 7.1%  | 20.6% | 21.3% |
| CELSR3       | 1951   | 21.2% | 22.8% | 20.0% | 21.3% |

|               |           |       |       |       |       |
|---------------|-----------|-------|-------|-------|-------|
| AIM2          | 9447      | 29.6% | 13.4% | 21.0% | 21.3% |
| RUSC2         | 9853      | 20.3% | 25.6% | 18.1% | 21.3% |
| TTF1          | 7270      | 26.1% | 12.2% | 25.8% | 21.3% |
| ATAD3B        | 83858     | 24.6% | 21.8% | 17.6% | 21.3% |
| SMAD5         | 4090      | 26.0% | 15.5% | 22.6% | 21.3% |
| CITED1        | 4435      | 21.6% | 22.6% | 19.9% | 21.3% |
| C20ORF70      | 140683    | 34.3% | 16.1% | 13.6% | 21.3% |
| MGC26979      | 91147     | 32.0% | 8.9%  | 23.1% | 21.3% |
| DCDC2         | 51473     | 17.7% | 20.2% | 26.1% | 21.3% |
| OR4C11        | 219429    | 17.5% | 23.0% | 23.6% | 21.3% |
| FLJ90024      | 129303    | 24.0% | 10.8% | 29.2% | 21.3% |
| LOC388701     | 388701    | 18.3% | 18.9% | 26.9% | 21.3% |
| IPMK          | 253430    | 17.3% | 22.9% | 23.9% | 21.4% |
| GIT2          | 9815      | 20.8% | 14.5% | 28.8% | 21.4% |
| BTA1          | 9044      | 28.2% | 17.2% | 18.6% | 21.4% |
| FBXO28        | 23219     | 27.2% | 14.6% | 22.2% | 21.4% |
| FLJ12994      | 64864     | 21.9% | 10.4% | 31.8% | 21.4% |
| LMNB2         | 84823     | 27.1% | 17.5% | 19.4% | 21.4% |
| TRIM23        | 373       | 29.5% | 16.6% | 18.0% | 21.4% |
| CSNK1E        | 1454      | 34.0% | 14.3% | 15.8% | 21.4% |
| TPP2          | 7174      | 24.4% | 20.1% | 19.6% | 21.4% |
| FAM32A        | 26017     | 27.4% | 12.8% | 23.8% | 21.4% |
| NRN1          | 51299     | 28.3% | 17.5% | 18.3% | 21.4% |
| IFI16         | 3428      | 18.8% | 12.5% | 32.8% | 21.4% |
| GCG           | 2641      | 22.0% | 27.5% | 14.6% | 21.4% |
| DISC1         | 27185     | 25.4% | 21.3% | 17.4% | 21.4% |
| FLJ12973      | 79968     | 16.5% | 17.6% | 30.1% | 21.4% |
| FNS           | 56935     | 19.0% | 18.2% | 26.9% | 21.4% |
| ZNF74         | 7625      | 24.3% | 19.4% | 20.4% | 21.4% |
| OR4C6         | 219432    | 16.7% | 16.7% | 30.8% | 21.4% |
| UTS2D         | 257313    | 21.4% | 17.5% | 25.2% | 21.4% |
| RP11-219C24.2 | 654348    | 21.9% | 21.3% | 20.9% | 21.4% |
| PHLDB2        | 90102     | 17.7% | 22.6% | 23.8% | 21.4% |
| LOC123169     | 123169    | 18.9% | 19.5% | 25.7% | 21.4% |
| ARR3          | 407       | 28.6% | 21.1% | 14.5% | 21.4% |
| DKK3          | 27122     | 25.5% | 18.1% | 20.6% | 21.4% |
| MGC2803       | 79002     | 18.1% | 19.6% | 26.4% | 21.4% |
| HIPK1         | 204851    | 23.5% | 18.3% | 22.3% | 21.4% |
| GPR74         | 10886     | 29.8% | 16.5% | 17.9% | 21.4% |
| MMS19L        | 64210     | 37.2% | 7.5%  | 19.4% | 21.4% |
| PLB1          | 151056    | 30.8% | 13.5% | 19.8% | 21.4% |
| RCOR2         | 283248    | 26.5% | 17.9% | 19.7% | 21.4% |
| LOC728635     | 728635    | 22.5% | 12.5% | 29.1% | 21.4% |
| ERAS          | 3266      | 25.2% | 26.7% | 12.3% | 21.4% |
| FLJ12529      | 79869     | 31.3% | 12.5% | 20.4% | 21.4% |
| JARID2        | 3720      | 22.8% | 26.7% | 14.6% | 21.4% |
| MYLIP         | 29116     | 25.4% | 18.8% | 20.0% | 21.4% |
| MUF1          | 10489     | 19.3% | 16.0% | 28.8% | 21.4% |
| KCNE1L        | 23630     | 30.7% | 11.5% | 22.0% | 21.4% |
| MYO1B         | 4430      | 25.0% | 14.1% | 25.1% | 21.4% |
| NRG2          | 9542      | 32.8% | 11.3% | 20.1% | 21.4% |
| LMCD1         | 29995     | 14.0% | 22.4% | 27.8% | 21.4% |
| CABP5         | 56344     | 26.6% | 21.7% | 15.9% | 21.4% |
| SLC2A10       | 81031     | 32.7% | 12.8% | 18.7% | 21.4% |
| TA-PP2C       | 160760    | 26.3% | 22.7% | 15.1% | 21.4% |
| TMPPRS513     | 84000     | 19.6% | 22.1% | 22.4% | 21.4% |
| DGKD          | 8527      | 20.2% | 27.5% | 16.4% | 21.4% |
| GPR126        | 57211     | 20.8% | 22.4% | 20.9% | 21.4% |
| NRBP          | 29959     | 28.8% | 24.7% | 10.7% | 21.4% |
| SH3GLB1       | 51100     | 28.7% | 19.5% | 16.0% | 21.4% |
| LOC83468      | 83468     | 27.2% | 14.0% | 23.0% | 21.4% |
| FLJ16237      | 392636    | 27.0% | 16.7% | 20.5% | 21.4% |
| PPM1D         | 8493      | 21.3% | 25.0% | 17.9% | 21.4% |
| FLJ12788      | 64427     | 12.5% | 23.0% | 28.7% | 21.4% |
| LATS2         | 26524     | 17.7% | 22.3% | 24.2% | 21.4% |
| UPB1          | 51733     | 26.5% | 21.1% | 16.6% | 21.4% |
| MGC23908      | 91408     | 14.1% | 18.3% | 31.7% | 21.4% |
| SDHC          | 6391      | 18.7% | 16.7% | 28.8% | 21.4% |
| VGLL4         | 9686      | 27.5% | 12.3% | 24.5% | 21.4% |
| PLCE1         | 51196     | 26.6% | 9.1%  | 28.4% | 21.4% |
| CDK3          | 1018      | 14.9% | 30.5% | 18.9% | 21.4% |
| PF20          | 79582     | 14.0% | 14.5% | 35.7% | 21.4% |
| SCXA          | 100129885 | 38.6% | 10.6% | 15.0% | 21.4% |
| HCG9          | 10255     | 27.2% | 16.3% | 20.8% | 21.4% |
| SLC5A1        | 6523      | 25.4% | 17.2% | 21.6% | 21.4% |
| AAK1          | 22848     | 17.1% | 16.0% | 31.2% | 21.4% |
| SLC27A4       | 10999     | 22.1% | 25.2% | 17.0% | 21.4% |
| TATDN1        | 83940     | 29.6% | 10.0% | 24.6% | 21.4% |
| EIF355        | 8665      | 29.5% | 11.7% | 23.0% | 21.4% |
| GLTSCR2       | 29997     | 32.1% | 9.5%  | 22.6% | 21.4% |
| KCNE1         | 3753      | 16.6% | 22.0% | 25.6% | 21.4% |
| UNQ9341       | 283420    | 21.8% | 15.2% | 27.2% | 21.4% |
| KIAA0174      | 9798      | 26.3% | 12.0% | 25.9% | 21.4% |
| ATF3          | 467       | 23.6% | 18.8% | 21.9% | 21.4% |
| SCYE1         | 9255      | 29.2% | 11.1% | 24.0% | 21.4% |
| CDCL5         | 988       | 10.0% | 15.8% | 38.5% | 21.4% |
| ATP13A4       | 84239     | 30.0% | 19.3% | 15.0% | 21.4% |
| BCNP1         | 199786    | 14.9% | 20.4% | 28.9% | 21.4% |
| SCRT2         | 85508     | 28.0% | 16.3% | 19.9% | 21.4% |
| SLC25A25      | 114789    | 27.4% | 16.8% | 20.1% | 21.4% |
| CYP51A1       | 1595      | 23.9% | 13.5% | 26.9% | 21.4% |
| TMEPAI        | 56937     | 19.7% | 23.6% | 21.0% | 21.4% |
| SCGB2A1       | 4246      | 26.0% | 19.8% | 18.5% | 21.4% |
| MLL3          | 58508     | 26.5% | 15.1% | 22.6% | 21.4% |
| C20ORF72      | 92667     | 19.7% | 26.6% | 18.0% | 21.4% |
| KIAA1539      | 80256     | 30.1% | 17.4% | 16.7% | 21.4% |
| C9ORF26       | 90865     | 24.6% | 14.1% | 25.6% | 21.4% |
| ORM1          | 5004      | 18.2% | 21.5% | 24.6% | 21.4% |

|           |        |       |       |       |       |
|-----------|--------|-------|-------|-------|-------|
| FLJ36870  | 285349 | 22.3% | 16.9% | 25.1% | 21.4% |
| CD33L3    | 284266 | 15.8% | 21.8% | 26.6% | 21.4% |
| MTM1      | 4534   | 22.5% | 24.2% | 17.6% | 21.4% |
| LTK       | 4058   | 23.2% | 21.1% | 20.0% | 21.4% |
| FLJ10634  | 55192  | 18.5% | 11.5% | 34.3% | 21.4% |
| MRPL12    | 6182   | 27.4% | 21.9% | 15.0% | 21.4% |
| SPN       | 6693   | 28.2% | 17.8% | 18.4% | 21.4% |
| CHR415SYT | 401135 | 23.3% | 21.1% | 20.0% | 21.4% |
| MYL6      | 4637   | 27.3% | 19.2% | 17.9% | 21.4% |
| PACSIN1   | 29993  | 10.5% | 30.4% | 23.4% | 21.4% |
| FAM3C     | 10447  | 18.9% | 21.0% | 24.4% | 21.4% |
| SERTAD2   | 9792   | 29.2% | 15.5% | 19.7% | 21.4% |
| COX17     | 10063  | 20.8% | 16.5% | 27.0% | 21.4% |
| LOC554235 | 554235 | 35.8% | 12.5% | 16.0% | 21.4% |
| CLU11     | 27098  | 38.2% | 13.3% | 12.8% | 21.4% |
| LOC653192 | 653192 | 35.6% | 12.7% | 16.1% | 21.4% |
| TAIP-2    | 80034  | 25.3% | 18.1% | 21.0% | 21.4% |
| FUT6      | 2528   | 23.1% | 23.8% | 17.4% | 21.4% |
| C20ORF99  | 85364  | 19.5% | 23.1% | 21.7% | 21.4% |
| CITED2    | 10370  | 14.7% | 23.8% | 25.9% | 21.5% |
| NR2C1     | 7181   | 19.5% | 26.3% | 18.6% | 21.5% |
| GMEB1     | 10691  | 29.9% | 18.8% | 15.6% | 21.5% |
| LOC401546 | 401546 | 19.0% | 21.9% | 23.5% | 21.5% |
| C1ORF26   | 54823  | 15.5% | 29.3% | 19.5% | 21.5% |
| ZNF584    | 201514 | 33.3% | 11.8% | 19.3% | 21.5% |
| USP9Y     | 8287   | 22.9% | 19.2% | 22.3% | 21.5% |
| MBIP      | 51562  | 20.7% | 17.4% | 26.3% | 21.5% |
| FLJ31978  | 144423 | 29.9% | 19.6% | 14.8% | 21.5% |
| LZTS2     | 84445  | 25.7% | 15.8% | 22.9% | 21.5% |
| FCER1A    | 2205   | 22.0% | 21.9% | 20.5% | 21.5% |
| THOC3     | 84321  | 38.0% | 15.1% | 11.2% | 21.5% |
| ABLIM2    | 84448  | 30.9% | 13.2% | 20.3% | 21.5% |
| FLJ12969  | 64860  | 20.1% | 18.5% | 25.8% | 21.5% |
| TGFBRAP1  | 9392   | 21.0% | 13.4% | 30.0% | 21.5% |
| SLC22A1LS | 5003   | 28.5% | 10.6% | 25.4% | 21.5% |
| SERPINE2  | 5270   | 27.5% | 17.9% | 19.0% | 21.5% |
| TRUB2     | 26995  | 16.1% | 21.7% | 26.6% | 21.5% |
| TSRC1     | 54507  | 18.0% | 20.2% | 26.1% | 21.5% |
| MGC4266   | 84766  | 19.6% | 9.8%  | 34.9% | 21.5% |
| WBP11     | 51729  | 34.5% | 16.8% | 13.1% | 21.5% |
| PRDM12    | 59335  | 22.2% | 14.5% | 27.7% | 21.5% |
| LIP8      | 116840 | 20.8% | 17.1% | 26.6% | 21.5% |
| GAGE6     | 2578   | 28.8% | 18.4% | 17.2% | 21.5% |
| ADAM23    | 8745   | 26.0% | 18.8% | 19.6% | 21.5% |
| LOC342096 | 342096 | 20.9% | 18.0% | 25.6% | 21.5% |
| C1ORF54   | 79630  | 21.6% | 22.5% | 20.3% | 21.5% |
| LG8       | 122042 | 19.0% | 22.0% | 23.4% | 21.5% |
| CENTB5    | 116983 | 23.7% | 16.7% | 24.1% | 21.5% |
| LOC91801  | 91801  | 19.5% | 10.6% | 34.3% | 21.5% |
| MAF1      | 84232  | 25.9% | 21.8% | 16.8% | 21.5% |
| TSPAN16   | 26526  | 23.9% | 13.6% | 26.9% | 21.5% |
| RDH8      | 50700  | 34.5% | 5.8%  | 24.1% | 21.5% |
| C1ORF16   | 9887   | 13.0% | 10.1% | 41.3% | 21.5% |
| LOC51054  | 51054  | 21.3% | 15.6% | 27.5% | 21.5% |
| HSCARG    | 57407  | 15.8% | 20.5% | 28.2% | 21.5% |
| ZNF708    | 7562   | 31.0% | 18.8% | 14.6% | 21.5% |
| KRTAP1-3  | 81850  | 27.2% | 14.3% | 23.0% | 21.5% |
| PCDHGA3   | 56112  | 19.7% | 18.2% | 26.5% | 21.5% |
| FA2H      | 79152  | 34.6% | 13.7% | 16.1% | 21.5% |
| IGSF4D    | 253559 | 29.3% | 16.7% | 18.5% | 21.5% |
| MTA3      | 57504  | 19.3% | 20.6% | 24.6% | 21.5% |
| ERO1LB    | 56605  | 26.5% | 17.9% | 20.1% | 21.5% |
| BUCS1     | 116285 | 35.8% | 15.2% | 13.5% | 21.5% |
| HMGB1     | 3146   | 20.4% | 13.7% | 30.4% | 21.5% |
| CHST11    | 50515  | 31.2% | 9.3%  | 24.0% | 21.5% |
| DNTT      | 1791   | 26.8% | 16.4% | 21.3% | 21.5% |
| TAF7      | 6879   | 22.4% | 15.1% | 26.9% | 21.5% |
| LOC375748 | 375748 | 26.7% | 19.6% | 18.2% | 21.5% |
| SIPA1L3   | 23094  | 25.9% | 19.8% | 18.8% | 21.5% |
| C9ORF117  | 286207 | 15.2% | 18.8% | 30.5% | 21.5% |
| LOC343071 | 343071 | 18.3% | 17.2% | 28.9% | 21.5% |
| TFAP2B    | 7021   | 32.3% | 17.8% | 14.4% | 21.5% |
| KIAA1196  | 57473  | 21.7% | 19.3% | 23.5% | 21.5% |
| BDH       | 622    | 28.3% | 13.4% | 22.8% | 21.5% |
| KCNA2     | 3737   | 21.8% | 16.7% | 26.0% | 21.5% |
| CCL20     | 6364   | 26.6% | 18.1% | 19.7% | 21.5% |
| FRMD1     | 79981  | 36.9% | 14.7% | 12.9% | 21.5% |
| CSF3      | 1440   | 26.1% | 12.1% | 26.3% | 21.5% |
| LOC285382 | 285382 | 11.7% | 36.7% | 16.0% | 21.5% |
| OR4D2     | 124538 | 18.9% | 24.6% | 21.0% | 21.5% |
| C1R       | 715    | 21.4% | 21.8% | 21.3% | 21.5% |
| DEHAL1    | 389434 | 25.7% | 17.0% | 21.8% | 21.5% |
| C20orf186 | 149954 | 23.9% | 17.3% | 23.3% | 21.5% |
| ANK3      | 288    | 16.1% | 22.9% | 25.5% | 21.5% |
| SPRY4     | 81848  | 31.9% | 18.7% | 13.9% | 21.5% |
| MRPS18B   | 28973  | 27.5% | 16.3% | 20.7% | 21.5% |
| ANK2      | 287    | 23.6% | 23.8% | 17.1% | 21.5% |
| IGSF1     | 3547   | 28.0% | 12.3% | 24.2% | 21.5% |
| TMIE      | 259236 | 11.5% | 27.6% | 25.4% | 21.5% |
| CNGB1     | 1258   | 27.4% | 15.9% | 21.2% | 21.5% |
| LDHD      | 197257 | 25.4% | 13.0% | 26.1% | 21.5% |
| HHLA2     | 11148  | 18.4% | 23.9% | 22.2% | 21.5% |
| PFKFB3    | 5209   | 22.7% | 24.9% | 16.9% | 21.5% |
| GPR65     | 8477   | 14.9% | 24.3% | 25.3% | 21.5% |
| CYP26C1   | 340665 | 15.0% | 19.1% | 30.4% | 21.5% |
| LRR1M3    | 347731 | 26.0% | 19.3% | 19.2% | 21.5% |
| HTR1D     | 3352   | 18.2% | 25.0% | 21.3% | 21.5% |
| DEFB113   | 245927 | 25.3% | 21.5% | 17.8% | 21.5% |

|           |        |       |       |       |       |
|-----------|--------|-------|-------|-------|-------|
| DC12      | 56941  | 24.8% | 15.8% | 24.0% | 21.5% |
| HT2R55    | 353164 | 23.0% | 13.7% | 27.8% | 21.5% |
| LOC388815 | 388815 | 13.5% | 22.6% | 28.4% | 21.5% |
| SDHB      | 6390   | 22.3% | 21.6% | 20.7% | 21.5% |
| DJ12208.2 | 57226  | 20.8% | 13.9% | 29.8% | 21.5% |
| LOC151871 | 151871 | 17.0% | 13.7% | 33.8% | 21.5% |
| NKTR      | 4820   | 13.2% | 33.0% | 18.4% | 21.5% |
| OTP       | 23440  | 19.8% | 29.8% | 14.9% | 21.5% |
| CX40.1    | 219770 | 19.8% | 25.5% | 19.3% | 21.5% |
| HIC1      | 3090   | 28.1% | 13.4% | 23.1% | 21.5% |
| ZNF278    | 23598  | 22.7% | 20.5% | 21.4% | 21.5% |
| EMR4      | 326342 | 24.1% | 13.9% | 26.6% | 21.5% |
| HIST1H3E  | 8353   | 24.4% | 20.0% | 20.2% | 21.5% |
| ELAVL1    | 1994   | 31.5% | 12.5% | 20.6% | 21.5% |
| CSNK1D    | 1453   | 18.7% | 22.7% | 23.2% | 21.5% |
| KIAA1023  | 23288  | 27.9% | 20.1% | 16.5% | 21.5% |
| TRIM67    | 440730 | 19.6% | 18.6% | 26.4% | 21.5% |
| ITGA5     | 3678   | 29.9% | 10.7% | 23.9% | 21.5% |
| H2AFX     | 3014   | 21.0% | 11.3% | 32.3% | 21.5% |
| ABCG8     | 64241  | 25.9% | 14.9% | 23.8% | 21.5% |
| AKR1C3    | 8644   | 32.5% | 15.1% | 17.1% | 21.5% |
| ANKRD36   | 375248 | 23.1% | 19.0% | 22.4% | 21.5% |
| OR2H3     | 7932   | 12.6% | 17.4% | 34.6% | 21.5% |
| OR2G2     | 81470  | 23.0% | 15.9% | 25.7% | 21.5% |
| LOC201164 | 201164 | 15.7% | 25.5% | 23.5% | 21.5% |
| BAI1      | 575    | 17.9% | 22.6% | 24.1% | 21.5% |
| CCL21     | 6366   | 21.8% | 30.2% | 12.7% | 21.5% |
| COMMD9    | 29099  | 21.4% | 21.6% | 21.6% | 21.5% |
| EMP1      | 2012   | 36.2% | 12.5% | 15.9% | 21.5% |
| SULT6B1   | 391365 | 17.6% | 31.2% | 15.8% | 21.5% |
| SYNPO2    | 171024 | 19.0% | 29.0% | 16.7% | 21.5% |
| NDUFA1    | 4694   | 23.2% | 18.7% | 22.7% | 21.5% |
| MGC10471  | 81576  | 14.8% | 20.0% | 29.8% | 21.5% |
| FLJ22054  | 79612  | 15.4% | 26.7% | 22.5% | 21.5% |
| FLJ33620  | 151790 | 18.6% | 27.8% | 18.2% | 21.6% |
| RFX2      | 5990   | 23.8% | 13.1% | 27.7% | 21.6% |
| F7        | 2155   | 8.1%  | 37.5% | 19.0% | 21.6% |
| ATF6      | 22926  | 33.3% | 10.2% | 21.1% | 21.6% |
| PLEKH1    | 219790 | 23.8% | 14.0% | 26.8% | 21.6% |
| RAFTLUN   | 23180  | 22.0% | 11.6% | 31.1% | 21.6% |
| RAI3      | 9052   | 21.1% | 22.4% | 21.1% | 21.6% |
| DHRS8     | 51170  | 25.0% | 18.1% | 21.6% | 21.6% |
| RYR3      | 6263   | 23.5% | 19.8% | 21.3% | 21.6% |
| C1QTNF2   | 114898 | 32.3% | 7.5%  | 24.9% | 21.6% |
| DCTN1     | 1639   | 29.9% | 10.5% | 24.3% | 21.6% |
| LOC284013 | 284013 | 27.3% | 15.9% | 21.4% | 21.6% |
| PRSS8     | 5652   | 30.5% | 20.9% | 13.3% | 21.6% |
| FCGR3A    | 2214   | 13.4% | 15.2% | 36.1% | 21.6% |
| MTMR4     | 9110   | 21.1% | 22.6% | 21.0% | 21.6% |
| MPO       | 4353   | 25.3% | 15.7% | 23.7% | 21.6% |
| LOC113444 | 113444 | 18.1% | 12.0% | 34.6% | 21.6% |
| MMP10     | 4319   | 31.6% | 12.5% | 20.5% | 21.6% |
| LOC51066  | 51066  | 16.9% | 23.2% | 24.6% | 21.6% |
| PPAT      | 5471   | 32.0% | 17.6% | 15.0% | 21.6% |
| DPF3      | 8110   | 30.8% | 14.9% | 19.0% | 21.6% |
| KIAA1764  | 85444  | 16.1% | 21.0% | 27.6% | 21.6% |
| FLJ45850  | 388569 | 21.0% | 11.6% | 32.1% | 21.6% |
| ZNF80     | 7634   | 23.7% | 21.8% | 19.2% | 21.6% |
| TWISTNB   | 221830 | 18.1% | 26.9% | 19.7% | 21.6% |
| RALGDS    | 5900   | 30.7% | 16.1% | 17.9% | 21.6% |
| CHRNA5    | 1138   | 21.0% | 16.9% | 26.9% | 21.6% |
| BTNL8     | 79908  | 20.0% | 22.5% | 22.2% | 21.6% |
| ZNF6      | 7552   | 20.2% | 11.3% | 33.2% | 21.6% |
| HERC6     | 55008  | 29.7% | 14.8% | 20.2% | 21.6% |
| OSGEP     | 55644  | 27.3% | 15.2% | 22.3% | 21.6% |
| AKR1C4    | 1109   | 32.7% | 9.0%  | 23.0% | 21.6% |
| OSBPL5    | 114879 | 31.0% | 19.7% | 14.1% | 21.6% |
| MGC50721  | 255762 | 22.6% | 21.9% | 20.2% | 21.6% |
| MAN2C1    | 4123   | 24.2% | 19.1% | 21.5% | 21.6% |
| SAMD7     | 344658 | 19.5% | 20.0% | 25.3% | 21.6% |
| KIAA1956  | 147686 | 15.6% | 16.2% | 33.0% | 21.6% |
| MGC4809   | 91860  | 14.6% | 9.7%  | 40.4% | 21.6% |
| ZNF410    | 57862  | 21.0% | 19.9% | 23.9% | 21.6% |
| CIDEB     | 27141  | 12.5% | 25.2% | 27.0% | 21.6% |
| CHCHD7    | 79145  | 27.0% | 17.2% | 20.5% | 21.6% |
| HIC       | 29969  | 16.7% | 14.2% | 33.9% | 21.6% |
| ANAPC4    | 29945  | 15.6% | 23.5% | 25.7% | 21.6% |
| STEAP     | 26872  | 27.6% | 11.0% | 26.1% | 21.6% |
| HECW1     | 23072  | 23.4% | 19.9% | 21.4% | 21.6% |
| PRKCA     | 5578   | 26.9% | 22.0% | 15.8% | 21.6% |
| LYZL1     | 84569  | 32.4% | 10.4% | 22.0% | 21.6% |
| ZBTB9     | 221504 | 26.5% | 18.4% | 19.9% | 21.6% |
| CDH17     | 1015   | 23.6% | 21.3% | 19.9% | 21.6% |
| HHIP      | 64399  | 15.4% | 22.4% | 27.0% | 21.6% |
| TNFSF18   | 8995   | 26.8% | 20.2% | 17.8% | 21.6% |
| LGALS14   | 56891  | 29.8% | 16.2% | 18.8% | 21.6% |
| MYCBPAP   | 84073  | 23.8% | 16.0% | 25.1% | 21.6% |
| OR2B2     | 81697  | 21.2% | 26.7% | 16.9% | 21.6% |
| MGC35194  | 93190  | 20.2% | 18.0% | 26.7% | 21.6% |
| FLJ22570  | 79930  | 17.4% | 20.9% | 26.4% | 21.6% |
| PTGES2    | 80142  | 21.4% | 23.6% | 19.7% | 21.6% |
| FLJ16139  | 440097 | 22.4% | 15.2% | 27.2% | 21.6% |
| F8        | 2157   | 32.9% | 16.5% | 15.4% | 21.6% |
| PRG3      | 10394  | 30.4% | 15.1% | 19.3% | 21.6% |
| ANXA7     | 310    | 22.2% | 20.3% | 22.4% | 21.6% |
| CALM3     | 808    | 15.7% | 22.0% | 27.1% | 21.6% |
| KCNA3     | 3738   | 34.5% | 9.2%  | 21.1% | 21.6% |
| POT1      | 25913  | 20.4% | 19.4% | 25.0% | 21.6% |

|              |           |       |       |       |       |
|--------------|-----------|-------|-------|-------|-------|
| LOC283755    | 283755    | 23.7% | 25.4% | 15.8% | 21.6% |
| PLIN         | 5346      | 30.3% | 10.0% | 24.5% | 21.6% |
| HOKA9        | 3205      | 30.8% | 20.1% | 13.9% | 21.6% |
| MRPL37       | 51253     | 25.1% | 23.3% | 16.4% | 21.6% |
| ENTH         | 9685      | 26.2% | 4.1%  | 34.5% | 21.6% |
| FNBP1        | 23048     | 15.5% | 27.3% | 22.0% | 21.6% |
| MAGED1       | 9500      | 16.1% | 29.9% | 18.8% | 21.6% |
| KCTD2        | 23510     | 32.7% | 10.6% | 21.6% | 21.6% |
| LOC340529    | 340529    | 20.6% | 9.6%  | 34.6% | 21.6% |
| KLF3         | 51274     | 27.2% | 15.9% | 21.8% | 21.6% |
| PDP2         | 57546     | 19.5% | 24.3% | 21.0% | 21.6% |
| UBXD2        | 23190     | 38.4% | 12.2% | 14.2% | 21.6% |
| RGS17        | 26575     | 29.4% | 19.8% | 15.6% | 21.6% |
| SLC17A4      | 10050     | 31.4% | 10.9% | 22.6% | 21.6% |
| PRKWNK2      | 65268     | 15.4% | 26.4% | 23.1% | 21.6% |
| ME2          | 4200      | 21.7% | 21.2% | 22.0% | 21.6% |
| ANGPTL5      | 253935    | 20.0% | 31.8% | 13.0% | 21.6% |
| RNF17        | 56163     | 26.7% | 13.2% | 25.0% | 21.6% |
| GPR139       | 124274    | 30.8% | 18.1% | 16.0% | 21.6% |
| CHSY1        | 22856     | 36.8% | 8.8%  | 19.3% | 21.6% |
| SEC23B       | 10483     | 13.6% | 19.6% | 31.7% | 21.6% |
| DHX16        | 8449      | 38.0% | 8.0%  | 18.9% | 21.6% |
| VHLL         | 391104    | 18.5% | 16.6% | 29.8% | 21.6% |
| TNNI2        | 7136      | 26.2% | 23.0% | 15.7% | 21.6% |
| LOC80298     | 80298     | 18.3% | 23.9% | 22.7% | 21.6% |
| FAM13A1      | 10144     | 31.3% | 20.4% | 13.2% | 21.6% |
| DKFZP434G156 | 64753     | 15.2% | 23.6% | 26.1% | 21.6% |
| OVOL1        | 5017      | 23.2% | 14.3% | 27.4% | 21.6% |
| GPR110       | 266977    | 27.8% | 20.6% | 16.5% | 21.6% |
| C6ORF129     | 154467    | 20.3% | 21.5% | 23.1% | 21.6% |
| NR1I2        | 8856      | 33.3% | 13.5% | 18.1% | 21.6% |
| LMO6         | 4007      | 29.8% | 17.3% | 17.8% | 21.6% |
| CCL17        | 6361      | 17.0% | 26.5% | 21.4% | 21.6% |
| DNAH11       | 8701      | 23.2% | 21.8% | 19.9% | 21.6% |
| ALAS1        | 211       | 26.6% | 20.2% | 18.2% | 21.6% |
| STK17B       | 9262      | 19.6% | 25.4% | 19.9% | 21.6% |
| TRAF6        | 7189      | 22.5% | 20.1% | 22.3% | 21.6% |
| RHCG         | 51458     | 30.7% | 10.6% | 23.6% | 21.6% |
| OR5AP2       | 338675    | 24.2% | 12.8% | 27.9% | 21.6% |
| UGT1A10      | 54575     | 32.9% | 11.7% | 20.3% | 21.6% |
| ENPP5        | 59084     | 17.7% | 21.8% | 25.4% | 21.6% |
| FLJ14753     | 84641     | 20.9% | 14.0% | 30.0% | 21.6% |
| DLAT         | 1737      | 25.8% | 22.4% | 16.7% | 21.6% |
| GREB1        | 9687      | 22.9% | 18.5% | 23.5% | 21.6% |
| TRPV5        | 56302     | 25.4% | 18.7% | 20.8% | 21.6% |
| HIC2         | 23119     | 30.1% | 16.1% | 18.7% | 21.6% |
| C14ORF171    | 57156     | 24.6% | 23.7% | 16.6% | 21.6% |
| LOC728656    | 728656    | 15.6% | 18.5% | 30.8% | 21.6% |
| FBXL15       | 79176     | 20.1% | 21.4% | 23.4% | 21.6% |
| FLJ21174     | 79921     | 22.7% | 10.2% | 32.1% | 21.6% |
| HPS6         | 79803     | 20.5% | 22.1% | 22.3% | 21.6% |
| DACT2        | 168002    | 29.2% | 9.6%  | 26.0% | 21.6% |
| KIAA1789     | 84460     | 21.8% | 4.8%  | 38.4% | 21.6% |
| NOLA1        | 54433     | 13.3% | 25.0% | 26.6% | 21.6% |
| FLJ10415     | 55139     | 25.6% | 22.8% | 16.6% | 21.6% |
| S100A8       | 6279      | 16.2% | 24.3% | 24.5% | 21.6% |
| PCDHA1       | 56147     | 28.0% | 14.3% | 22.6% | 21.6% |
| EBNA1BP2     | 10969     | 12.6% | 29.7% | 22.6% | 21.6% |
| TCTE1L       | 6990      | 12.6% | 16.9% | 35.5% | 21.6% |
| RABL4        | 11020     | 37.2% | 10.7% | 17.0% | 21.6% |
| NRBP2        | 340371    | 25.5% | 20.4% | 19.1% | 21.6% |
| DRCTNBN1A    | 84668     | 16.0% | 12.2% | 36.8% | 21.7% |
| MID2         | 11043     | 38.1% | 10.0% | 16.8% | 21.7% |
| DUSP22       | 56940     | 29.2% | 21.4% | 14.3% | 21.7% |
| TNNI3        | 7137      | 34.3% | 9.5%  | 21.1% | 21.7% |
| AP2B1        | 163       | 24.4% | 19.3% | 21.3% | 21.7% |
| CTMP         | 117145    | 16.2% | 18.8% | 29.9% | 21.7% |
| MAP2K1IP1    | 8649      | 18.2% | 18.4% | 28.4% | 21.7% |
| CDH23        | 64072     | 24.8% | 19.6% | 20.6% | 21.7% |
| NPL          | 80896     | 24.7% | 21.0% | 19.3% | 21.7% |
| TMSB10       | 9168      | 19.4% | 19.5% | 26.0% | 21.7% |
| KRTAP3-3     | 85293     | 23.5% | 14.5% | 27.0% | 21.7% |
| MGC2963      | 83460     | 18.2% | 17.9% | 28.9% | 21.7% |
| LRRN3        | 54674     | 22.8% | 23.8% | 18.4% | 21.7% |
| FGR          | 2268      | 17.1% | 30.1% | 17.8% | 21.7% |
| LOC100130958 | 100130958 | 25.1% | 16.5% | 23.4% | 21.7% |
| MGC34728     | 152065    | 18.2% | 25.6% | 21.2% | 21.7% |
| RASSF1       | 11186     | 22.0% | 23.9% | 19.2% | 21.7% |
| USH1C        | 10083     | 38.6% | 15.6% | 10.8% | 21.7% |
| P2RY11       | 5032      | 20.0% | 20.0% | 25.0% | 21.7% |
| PPP3R1       | 5534      | 18.9% | 31.8% | 14.3% | 21.7% |
| LIF          | 3976      | 20.0% | 19.0% | 26.0% | 21.7% |
| CNNM1        | 26507     | 22.8% | 16.7% | 25.4% | 21.7% |
| EIF2B5       | 8893      | 28.6% | 10.0% | 26.4% | 21.7% |
| PLCD1        | 5333      | 25.3% | 11.8% | 28.0% | 21.7% |
| FLJ00038     | 375690    | 22.6% | 18.5% | 23.9% | 21.7% |
| NDNL2        | 56160     | 18.7% | 19.3% | 27.0% | 21.7% |
| FLJ20313     | 54893     | 16.1% | 14.1% | 34.9% | 21.7% |
| SETBP1       | 26040     | 27.6% | 25.7% | 11.7% | 21.7% |
| TBX6         | 6911      | 26.0% | 8.3%  | 30.7% | 21.7% |
| IPO8         | 10526     | 22.8% | 19.6% | 22.6% | 21.7% |
| WARP         | 64856     | 20.0% | 14.0% | 31.1% | 21.7% |
| SFRS4        | 6429      | 28.0% | 20.4% | 16.7% | 21.7% |
| NFE2L2       | 4780      | 17.9% | 22.8% | 24.4% | 21.7% |
| FLJ13868     | 64755     | 21.5% | 20.0% | 23.5% | 21.7% |
| RBM6         | 10180     | 24.5% | 13.7% | 26.9% | 21.7% |
| TOMM20       | 9804      | 27.0% | 27.3% | 10.7% | 21.7% |
| MGC29729     | 92002     | 15.4% | 22.6% | 27.0% | 21.7% |

|               |        |       |       |       |       |
|---------------|--------|-------|-------|-------|-------|
| FOXK1         | 221937 | 32.9% | 12.9% | 19.3% | 21.7% |
| PLSCR2        | 57047  | 26.4% | 26.3% | 12.3% | 21.7% |
| FLJ13236      | 79962  | 31.9% | 13.5% | 19.7% | 21.7% |
| ARRDC1        | 92714  | 26.1% | 19.4% | 19.6% | 21.7% |
| C10ORF6       | 55719  | 21.5% | 21.3% | 22.3% | 21.7% |
| MGC50372      | 253143 | 14.5% | 11.8% | 38.7% | 21.7% |
| GIPR          | 2696   | 21.8% | 25.0% | 18.3% | 21.7% |
| FAM26B        | 51063  | 21.4% | 18.6% | 25.2% | 21.7% |
| PGGT1B        | 5229   | 21.9% | 19.6% | 23.6% | 21.7% |
| MRPS35        | 60488  | 21.1% | 22.4% | 21.6% | 21.7% |
| MGC33094      | 159163 | 16.8% | 11.3% | 37.0% | 21.7% |
| DC13          | 56942  | 18.8% | 18.6% | 27.6% | 21.7% |
| SLAMF6        | 114836 | 35.9% | 13.8% | 15.4% | 21.7% |
| LOC285429     | 285429 | 10.5% | 26.8% | 27.8% | 21.7% |
| EGR2          | 1959   | 16.2% | 28.3% | 20.6% | 21.7% |
| DDX49         | 54555  | 24.0% | 28.5% | 12.6% | 21.7% |
| FLJ39963      | 349075 | 18.4% | 20.6% | 26.1% | 21.7% |
| EMR1          | 2015   | 26.1% | 18.8% | 20.2% | 21.7% |
| FLJ10847      | 55244  | 21.4% | 8.3%  | 35.4% | 21.7% |
| PUS3          | 83480  | 17.2% | 21.1% | 26.8% | 21.7% |
| PTPLB         | 201562 | 24.5% | 23.3% | 17.3% | 21.7% |
| NMES1         | 84419  | 21.9% | 20.3% | 23.0% | 21.7% |
| KIF26A        | 26153  | 33.8% | 19.6% | 11.7% | 21.7% |
| PIAS2         | 9063   | 31.8% | 13.7% | 19.6% | 21.7% |
| DC2           | 58505  | 31.2% | 10.9% | 23.0% | 21.7% |
| C6ORF11       | 9277   | 6.9%  | 29.3% | 28.9% | 21.7% |
| MGC35521      | 246330 | 20.5% | 27.8% | 16.8% | 21.7% |
| LY86          | 9450   | 31.7% | 16.4% | 17.0% | 21.7% |
| TBPL1         | 9519   | 28.6% | 16.8% | 19.8% | 21.7% |
| BAL           | 83666  | 18.0% | 22.8% | 24.3% | 21.7% |
| PLN           | 5350   | 25.5% | 22.5% | 17.0% | 21.7% |
| MDS010        | 56983  | 14.6% | 20.0% | 30.6% | 21.7% |
| LOC389119     | 389119 | 20.8% | 19.4% | 24.9% | 21.7% |
| FLJ34969      | 201627 | 11.7% | 18.1% | 35.4% | 21.7% |
| KCNQ1         | 3784   | 25.1% | 12.4% | 27.6% | 21.7% |
| HBXAP         | 51773  | 35.6% | 9.3%  | 20.2% | 21.7% |
| GTPBP1        | 9567   | 17.6% | 10.0% | 37.5% | 21.7% |
| CLC           | 1178   | 26.6% | 20.1% | 18.5% | 21.7% |
| FNBP4         | 23360  | 21.6% | 20.7% | 22.9% | 21.7% |
| EBAF          | 7044   | 30.8% | 16.9% | 17.5% | 21.7% |
| LOC112476     | 112476 | 14.6% | 15.2% | 35.4% | 21.7% |
| MARCH8        | 220972 | 19.9% | 20.1% | 25.2% | 21.7% |
| CARD15        | 64127  | 33.2% | 9.0%  | 23.0% | 21.7% |
| DUSP14        | 11072  | 18.6% | 20.9% | 25.6% | 21.7% |
| FLJ10504      | 55154  | 20.9% | 19.6% | 24.7% | 21.7% |
| CASB          | 11238  | 38.5% | 11.6% | 15.1% | 21.7% |
| PSMD5         | 5711   | 17.1% | 21.6% | 26.5% | 21.7% |
| PP1L1         | 51645  | 26.8% | 17.5% | 21.0% | 21.7% |
| SNAP91        | 9892   | 23.6% | 25.7% | 15.9% | 21.7% |
| CYP2E1        | 1571   | 39.0% | 9.0%  | 17.2% | 21.7% |
| KIAA1002      | 22864  | 24.3% | 20.3% | 20.6% | 21.7% |
| FLJ12057      | 79825  | 24.3% | 14.2% | 26.8% | 21.7% |
| FLJ20641      | 55010  | 14.1% | 22.7% | 28.4% | 21.7% |
| BIRC7         | 79444  | 23.7% | 15.5% | 26.0% | 21.7% |
| FLJ32115      | 121506 | 9.3%  | 27.6% | 28.3% | 21.7% |
| DDX43         | 55510  | 27.7% | 27.7% | 9.8%  | 21.7% |
| KATNAL2       | 83473  | 32.3% | 18.1% | 14.9% | 21.7% |
| CSTA          | 1475   | 38.0% | 15.8% | 11.4% | 21.7% |
| ANKRD34       | 284615 | 31.1% | 16.6% | 17.5% | 21.7% |
| SCMH1         | 22955  | 29.1% | 14.0% | 22.1% | 21.7% |
| MYH2          | 4620   | 33.1% | 9.8%  | 22.3% | 21.7% |
| PQLC1         | 80148  | 26.3% | 16.1% | 22.8% | 21.7% |
| FOXN1         | 8456   | 22.1% | 21.6% | 21.5% | 21.7% |
| CDKL3         | 51265  | 24.2% | 19.9% | 21.2% | 21.7% |
| F11           | 2160   | 31.5% | 15.2% | 18.6% | 21.7% |
| MGC26717      | 285237 | 15.8% | 16.1% | 33.3% | 21.7% |
| PTCHD1        | 139411 | 29.7% | 14.8% | 20.8% | 21.7% |
| FLJ40873      | 200132 | 24.4% | 9.2%  | 31.7% | 21.7% |
| DPP8          | 54878  | 21.6% | 27.5% | 16.1% | 21.8% |
| TAF3          | 284467 | 26.4% | 20.9% | 17.9% | 21.8% |
| CD86          | 942    | 21.7% | 24.9% | 18.6% | 21.8% |
| RHCE          | 6006   | 25.4% | 17.3% | 22.5% | 21.8% |
| CRYM          | 1428   | 19.8% | 25.0% | 20.4% | 21.8% |
| LOC388799     | 388799 | 18.3% | 22.9% | 24.1% | 21.8% |
| GSTO2         | 119391 | 19.9% | 25.0% | 20.4% | 21.8% |
| EIF4E3        | 317649 | 23.6% | 14.8% | 26.8% | 21.8% |
| LOC201229     | 201229 | 25.0% | 14.8% | 25.5% | 21.8% |
| ACTC          | 70     | 25.6% | 8.0%  | 31.7% | 21.8% |
| SLC43A1       | 8501   | 30.6% | 13.8% | 20.8% | 21.8% |
| FLJ32784      | 127731 | 20.5% | 22.1% | 22.7% | 21.8% |
| TNFRSF10C     | 8794   | 22.3% | 22.5% | 20.5% | 21.8% |
| HNRNP-G-T     | 27288  | 17.7% | 22.9% | 24.7% | 21.8% |
| SLC22A15      | 55356  | 24.6% | 22.3% | 18.4% | 21.8% |
| DNAH5         | 1767   | 18.7% | 22.0% | 24.6% | 21.8% |
| SUFU          | 51684  | 33.7% | 14.9% | 16.7% | 21.8% |
| LOC644997     | 644997 | 10.9% | 29.4% | 25.0% | 21.8% |
| GRIA1         | 2890   | 35.5% | 10.2% | 19.7% | 21.8% |
| DKFZP566J2046 | 81889  | 26.2% | 16.7% | 22.5% | 21.8% |
| B3GALT5       | 10317  | 23.4% | 23.9% | 18.1% | 21.8% |
| TNFSF8        | 944    | 33.6% | 17.3% | 14.4% | 21.8% |
| MGC26818      | 127281 | 18.9% | 16.2% | 30.3% | 21.8% |
| ZNF330        | 27309  | 28.8% | 15.8% | 20.7% | 21.8% |
| SLC6A8        | 6535   | 23.7% | 19.6% | 22.0% | 21.8% |
| SDCCAG8       | 10806  | 23.1% | 21.3% | 20.9% | 21.8% |
| CD2BP2        | 10421  | 16.5% | 20.6% | 28.2% | 21.8% |
| NCR1          | 9437   | 21.4% | 19.1% | 24.8% | 21.8% |
| ITPKA         | 3706   | 25.1% | 20.1% | 20.1% | 21.8% |
| PPP2R5A       | 5525   | 33.3% | 20.8% | 11.2% | 21.8% |

|              |        |       |       |       |       |
|--------------|--------|-------|-------|-------|-------|
| FABP1        | 2168   | 23.2% | 21.8% | 20.4% | 21.8% |
| RBAK         | 57786  | 33.5% | 10.8% | 21.1% | 21.8% |
| EYA3         | 2140   | 32.2% | 19.1% | 14.0% | 21.8% |
| COVA1        | 10495  | 14.7% | 19.0% | 31.6% | 21.8% |
| ZNF151       | 7709   | 31.8% | 18.4% | 15.2% | 21.8% |
| MGC20419     | 112970 | 22.2% | 21.1% | 22.1% | 21.8% |
| SPFH1        | 10613  | 17.8% | 15.6% | 32.0% | 21.8% |
| TTLL2        | 83887  | 15.4% | 14.3% | 35.7% | 21.8% |
| FLJ33810     | 283422 | 19.9% | 16.8% | 28.7% | 21.8% |
| FLJ20280     | 54876  | 14.8% | 30.4% | 20.2% | 21.8% |
| MGC40579     | 256356 | 24.3% | 17.8% | 23.3% | 21.8% |
| SERPING1     | 710    | 28.6% | 15.8% | 21.0% | 21.8% |
| FAM9B        | 171483 | 16.9% | 22.7% | 25.8% | 21.8% |
| NFYA         | 4800   | 20.6% | 24.7% | 20.1% | 21.8% |
| ZNF577       | 84765  | 15.9% | 28.8% | 20.7% | 21.8% |
| FLJ45212     | 399879 | 17.7% | 14.0% | 33.8% | 21.8% |
| TBRG4        | 9238   | 36.8% | 12.2% | 16.5% | 21.8% |
| C4ORF8       | 8603   | 34.8% | 18.3% | 12.3% | 21.8% |
| TUBA1        | 7277   | 27.3% | 10.3% | 27.8% | 21.8% |
| IL18RAP      | 8807   | 21.2% | 25.0% | 19.2% | 21.8% |
| ZD52F10      | 93099  | 17.3% | 13.3% | 34.8% | 21.8% |
| MMP2         | 4313   | 25.4% | 21.9% | 18.2% | 21.8% |
| DKFZP564C186 | 26155  | 20.5% | 18.9% | 26.0% | 21.8% |
| GOSR2        | 9570   | 26.2% | 19.5% | 19.7% | 21.8% |
| PGLS         | 25796  | 31.1% | 10.7% | 23.6% | 21.8% |
| OR51E2       | 81285  | 17.4% | 22.8% | 25.3% | 21.8% |
| FLJ32915     | 219844 | 22.7% | 14.2% | 28.5% | 21.8% |
| NCK2         | 8440   | 23.8% | 17.4% | 24.2% | 21.8% |
| WDR37        | 22884  | 27.8% | 22.7% | 14.9% | 21.8% |
| CACNA2D3     | 55799  | 27.1% | 14.4% | 23.9% | 21.8% |
| SLC35F5      | 80255  | 30.4% | 22.0% | 13.1% | 21.8% |
| HIST1H4J     | 8363   | 22.8% | 21.6% | 21.1% | 21.8% |
| GBP4         | 115361 | 26.6% | 18.8% | 20.1% | 21.8% |
| ITGB1BP2     | 26548  | 16.1% | 23.5% | 25.8% | 21.8% |
| CLEC4E       | 26253  | 28.9% | 19.5% | 17.1% | 21.8% |
| SLC23A3      | 151295 | 20.2% | 23.0% | 22.2% | 21.8% |
| LOC55831     | 55831  | 17.5% | 14.4% | 33.6% | 21.8% |
| AMY2B        | 280    | 24.7% | 21.8% | 19.0% | 21.8% |
| IRF2BP2      | 359948 | 33.1% | 20.5% | 11.9% | 21.8% |
| KCNJ9        | 3765   | 30.5% | 9.3%  | 25.6% | 21.8% |
| FMOD         | 2331   | 38.9% | 11.8% | 14.8% | 21.8% |
| CLDN17       | 26285  | 27.2% | 26.9% | 11.4% | 21.8% |
| TULP1        | 7287   | 31.0% | 11.4% | 23.1% | 21.8% |
| FGF8         | 2253   | 31.6% | 19.1% | 14.7% | 21.8% |
| ZADH1        | 145482 | 31.2% | 15.2% | 19.0% | 21.8% |
| SGCZ         | 137868 | 24.9% | 12.1% | 28.5% | 21.8% |
| FLJ32001     | 163882 | 22.2% | 12.5% | 30.8% | 21.8% |
| CGI-48       | 51096  | 18.5% | 17.3% | 29.6% | 21.8% |
| BIRC8        | 112401 | 26.3% | 22.1% | 17.1% | 21.8% |
| CXXC4        | 80319  | 35.7% | 10.3% | 19.4% | 21.8% |
| LOC131368    | 131368 | 17.5% | 23.9% | 24.1% | 21.8% |
| SHANK1       | 50944  | 19.3% | 21.3% | 24.9% | 21.8% |
| LRRC24       | 441381 | 23.2% | 16.6% | 25.8% | 21.8% |
| CUGBP2       | 10659  | 33.5% | 12.6% | 19.4% | 21.8% |
| ANXA9        | 8416   | 20.3% | 20.5% | 24.7% | 21.8% |
| RAD18        | 56852  | 25.7% | 16.7% | 23.1% | 21.8% |
| GPR43        | 2867   | 27.2% | 20.7% | 17.6% | 21.8% |
| MYF5         | 4617   | 45.5% | 7.9%  | 12.2% | 21.8% |
| TMEM89       | 440955 | 34.6% | 15.0% | 15.9% | 21.8% |
| MGC20255     | 90324  | 19.8% | 21.1% | 24.7% | 21.8% |
| GPR154       | 387129 | 20.0% | 27.9% | 17.6% | 21.8% |
| DHPS         | 1725   | 24.1% | 16.3% | 25.1% | 21.8% |
| MGC39581     | 257062 | 24.7% | 10.6% | 30.2% | 21.8% |
| TRIM58       | 25893  | 31.0% | 11.1% | 23.4% | 21.8% |
| FBXO31       | 79791  | 20.8% | 19.2% | 25.5% | 21.8% |
| LOC389677    | 389677 | 23.3% | 10.4% | 31.8% | 21.8% |
| SOC56        | 9306   | 21.5% | 17.5% | 26.5% | 21.8% |
| NUDT15       | 55270  | 26.1% | 14.8% | 24.6% | 21.8% |
| TRIM2        | 23321  | 21.6% | 24.8% | 19.1% | 21.8% |
| APOL3        | 80833  | 33.3% | 15.5% | 16.8% | 21.9% |
| CROC4        | 10485  | 15.2% | 27.8% | 22.5% | 21.9% |
| OR4K14       | 122740 | 29.7% | 14.0% | 21.9% | 21.9% |
| SLC25A10     | 1468   | 23.6% | 22.6% | 19.4% | 21.9% |
| SLC16A4      | 9122   | 25.8% | 11.6% | 28.2% | 21.9% |
| IRX4         | 50805  | 28.1% | 16.5% | 21.0% | 21.9% |
| CDH1         | 999    | 18.5% | 15.9% | 31.2% | 21.9% |
| MAP2K5       | 5607   | 20.5% | 19.8% | 25.2% | 21.9% |
| MGC13170     | 84798  | 17.4% | 13.8% | 34.4% | 21.9% |
| STX7         | 8417   | 27.3% | 16.5% | 21.8% | 21.9% |
| NCBP2        | 22916  | 32.3% | 14.3% | 19.0% | 21.9% |
| H2AFY        | 9555   | 37.3% | 17.0% | 11.3% | 21.9% |
| C20ORF139    | 140809 | 29.4% | 16.6% | 19.6% | 21.9% |
| SLC7A2       | 6542   | 26.2% | 23.5% | 16.0% | 21.9% |
| ALPPL2       | 251    | 16.4% | 29.9% | 19.4% | 21.9% |
| C10ORF27     | 219793 | 39.3% | 15.3% | 11.0% | 21.9% |
| C9ORF74      | 81605  | 19.7% | 17.3% | 28.5% | 21.9% |
| SNIP1        | 79753  | 21.8% | 13.7% | 30.1% | 21.9% |
| AK7          | 122481 | 24.4% | 22.6% | 18.6% | 21.9% |
| LOC124402    | 124402 | 20.2% | 18.1% | 27.4% | 21.9% |
| CY5          | 1528   | 25.0% | 15.7% | 24.9% | 21.9% |
| HDC          | 3067   | 29.5% | 21.3% | 14.9% | 21.9% |
| TNRC6        | 27327  | 27.5% | 8.8%  | 29.3% | 21.9% |
| LOC164153    | 164153 | 23.3% | 14.4% | 27.9% | 21.9% |
| MRPL54       | 116541 | 35.6% | 12.8% | 17.2% | 21.9% |
| FUBP1        | 8880   | 34.4% | 14.3% | 16.9% | 21.9% |
| PAQR4        | 124222 | 17.9% | 18.8% | 29.0% | 21.9% |
| GRM2         | 2912   | 30.1% | 16.7% | 18.8% | 21.9% |
| KIAA1632     | 57724  | 32.4% | 8.9%  | 24.3% | 21.9% |

|               |        |       |       |       |       |
|---------------|--------|-------|-------|-------|-------|
| GPR83         | 10888  | 20.5% | 24.2% | 20.9% | 21.9% |
| CARD4         | 10392  | 20.6% | 18.4% | 26.6% | 21.9% |
| RNF152        | 220441 | 23.0% | 15.7% | 26.9% | 21.9% |
| HSD3B7        | 80270  | 21.4% | 21.5% | 22.8% | 21.9% |
| SOX8          | 30812  | 27.7% | 21.0% | 17.0% | 21.9% |
| MADCAM1       | 8174   | 35.7% | 13.6% | 16.3% | 21.9% |
| FLJ20291      | 54883  | 19.3% | 19.8% | 26.5% | 21.9% |
| HSPC154       | 29090  | 11.5% | 26.9% | 27.3% | 21.9% |
| MGC23401      | 196441 | 19.9% | 15.5% | 30.2% | 21.9% |
| COH1          | 157680 | 19.4% | 17.2% | 29.0% | 21.9% |
| PSKH1         | 5681   | 19.8% | 23.4% | 22.5% | 21.9% |
| FLJ39822      | 151258 | 23.7% | 16.1% | 25.8% | 21.9% |
| DAB2          | 1601   | 26.7% | 17.0% | 22.0% | 21.9% |
| BCOR          | 54880  | 24.0% | 18.4% | 23.2% | 21.9% |
| SPIN3         | 169981 | 20.0% | 20.7% | 25.0% | 21.9% |
| FLJ23550      | 80133  | 20.7% | 9.3%  | 35.7% | 21.9% |
| BDKRB1        | 623    | 23.1% | 21.2% | 21.3% | 21.9% |
| FLJ38973      | 205327 | 18.3% | 24.2% | 23.2% | 21.9% |
| HSFY1         | 86614  | 26.7% | 16.0% | 22.9% | 21.9% |
| C12ORF5       | 57103  | 23.5% | 10.6% | 31.6% | 21.9% |
| KIF15         | 56992  | 28.4% | 21.8% | 15.5% | 21.9% |
| HYAL2         | 8692   | 36.4% | 7.1%  | 22.2% | 21.9% |
| HSPB7         | 27129  | 23.5% | 20.3% | 21.8% | 21.9% |
| TLR9          | 54106  | 27.3% | 27.0% | 11.3% | 21.9% |
| KIAA1982      | 170960 | 27.7% | 14.1% | 23.8% | 21.9% |
| NAB2          | 4665   | 23.6% | 11.6% | 30.5% | 21.9% |
| FLJ23577      | 79925  | 25.9% | 24.3% | 15.5% | 21.9% |
| KLF7          | 8609   | 22.3% | 20.6% | 22.8% | 21.9% |
| MANBAL        | 63905  | 13.9% | 26.4% | 25.4% | 21.9% |
| FKBP9         | 11328  | 32.8% | 10.6% | 22.3% | 21.9% |
| ALG1          | 56052  | 27.0% | 13.7% | 24.9% | 21.9% |
| C9ORF95       | 54981  | 20.4% | 21.0% | 24.3% | 21.9% |
| CST1          | 1469   | 30.6% | 18.0% | 17.0% | 21.9% |
| CALB3         | 795    | 13.7% | 21.3% | 30.7% | 21.9% |
| FLJ40452      | 115708 | 23.1% | 9.9%  | 32.7% | 21.9% |
| USP14         | 9097   | 29.7% | 12.8% | 23.2% | 21.9% |
| ST8SIA5       | 29906  | 23.7% | 18.1% | 23.9% | 21.9% |
| PKD1L3        | 342372 | 26.8% | 13.6% | 25.3% | 21.9% |
| SNX14         | 57231  | 23.6% | 22.3% | 19.8% | 21.9% |
| TEKT1         | 83659  | 20.0% | 18.2% | 27.5% | 21.9% |
| LIMK2         | 3985   | 20.1% | 25.1% | 20.5% | 21.9% |
| FBXL4         | 26235  | 29.7% | 16.9% | 19.1% | 21.9% |
| C20ORF20      | 55257  | 24.8% | 16.7% | 24.2% | 21.9% |
| CABLES1       | 91768  | 23.2% | 22.5% | 20.0% | 21.9% |
| MORC          | 27136  | 28.8% | 6.3%  | 30.6% | 21.9% |
| FLJ36749      | 283571 | 17.8% | 17.7% | 30.3% | 21.9% |
| SLC22A7       | 10864  | 24.6% | 17.7% | 23.4% | 21.9% |
| NBL1          | 4681   | 27.7% | 19.9% | 18.1% | 21.9% |
| GPR141        | 353345 | 24.8% | 16.4% | 24.5% | 21.9% |
| RNPEP         | 6051   | 25.2% | 23.4% | 17.1% | 21.9% |
| TATDN2        | 9797   | 23.8% | 25.0% | 17.0% | 21.9% |
| LOC441054     | 441054 | 28.1% | 20.9% | 16.7% | 21.9% |
| ZNF2          | 7549   | 28.8% | 16.3% | 20.6% | 21.9% |
| PNCK          | 139728 | 18.5% | 25.0% | 22.2% | 21.9% |
| B3GAT3        | 26229  | 36.3% | 13.3% | 16.1% | 21.9% |
| ERCC5         | 2073   | 32.8% | 17.9% | 15.1% | 21.9% |
| C6ORF139      | 55166  | 16.4% | 8.8%  | 40.6% | 21.9% |
| KPTN          | 11133  | 39.1% | 10.2% | 16.5% | 21.9% |
| GLB1L         | 79411  | 27.9% | 20.0% | 17.8% | 21.9% |
| DCD           | 117159 | 22.2% | 23.5% | 20.0% | 21.9% |
| CLSPN         | 63967  | 17.1% | 17.4% | 31.3% | 21.9% |
| BAG2          | 9532   | 26.4% | 16.1% | 23.3% | 21.9% |
| ZNF499        | 84878  | 21.3% | 20.7% | 23.8% | 21.9% |
| PIAS1         | 8554   | 29.0% | 14.8% | 22.0% | 21.9% |
| SPRED1        | 161742 | 33.7% | 13.8% | 18.2% | 21.9% |
| DKFZP564J0863 | 25923  | 20.8% | 16.8% | 28.3% | 21.9% |
| ZNFN1A2       | 22807  | 22.4% | 21.3% | 22.1% | 21.9% |
| ZNF444        | 55311  | 29.2% | 19.1% | 17.5% | 21.9% |
| KCNK13        | 56659  | 24.7% | 6.9%  | 34.2% | 21.9% |
| CBLN2         | 147381 | 16.8% | 18.7% | 30.4% | 21.9% |
| FLJ25770      | 339965 | 24.8% | 21.5% | 19.5% | 21.9% |
| BMP1          | 649    | 31.2% | 18.3% | 16.3% | 21.9% |
| CRIP2         | 1397   | 33.9% | 15.6% | 16.4% | 21.9% |
| SSH1          | 54434  | 16.8% | 25.6% | 23.3% | 21.9% |
| EGFR          | 1956   | 19.1% | 21.0% | 25.7% | 21.9% |
| SCA1          | 6310   | 23.6% | 21.9% | 20.3% | 21.9% |
| LSM10         | 84967  | 26.6% | 20.7% | 18.5% | 21.9% |
| FLJ31810      | 158038 | 20.6% | 8.8%  | 36.4% | 21.9% |
| EIF2B1        | 1967   | 15.8% | 26.9% | 23.1% | 21.9% |
| SYT10         | 341359 | 17.7% | 17.6% | 30.5% | 21.9% |
| WBSCR20C      | 260294 | 31.8% | 12.3% | 21.7% | 21.9% |
| LHCGR         | 3973   | 27.2% | 19.7% | 18.9% | 21.9% |
| C8ORF13       | 83648  | 18.8% | 21.5% | 25.6% | 21.9% |
| MGC17839      | 219902 | 18.0% | 15.1% | 32.7% | 21.9% |
| SMNDC1        | 10285  | 28.6% | 15.3% | 22.0% | 21.9% |
| CD99          | 4267   | 32.7% | 16.3% | 16.9% | 21.9% |
| FGF3          | 2248   | 30.9% | 9.3%  | 25.6% | 21.9% |
| FLJ14011      | 63934  | 13.1% | 33.5% | 19.2% | 21.9% |
| SLC30A8       | 169026 | 33.7% | 19.2% | 13.0% | 21.9% |
| MTAC2D1       | 123036 | 37.8% | 15.7% | 12.4% | 21.9% |
| CHRFAM7A      | 89832  | 17.1% | 18.7% | 30.0% | 21.9% |
| PDE3B         | 5140   | 19.0% | 22.3% | 24.6% | 21.9% |
| BF            | 629    | 23.4% | 20.0% | 22.4% | 21.9% |
| EMD           | 2010   | 20.9% | 15.7% | 29.3% | 21.9% |
| LOC142910     | 142910 | 16.5% | 21.3% | 28.0% | 22.0% |
| ERAL1         | 26284  | 31.9% | 11.0% | 23.0% | 22.0% |
| PRKWINK3      | 65267  | 22.1% | 24.3% | 19.5% | 22.0% |
| ING5          | 84289  | 29.9% | 16.4% | 19.5% | 22.0% |



|               |        |       |       |       |       |
|---------------|--------|-------|-------|-------|-------|
| ZNF485        | 220992 | 20.5% | 19.6% | 25.8% | 22.0% |
| COL8A1        | 1295   | 24.5% | 19.3% | 22.1% | 22.0% |
| LOC91431      | 91431  | 25.3% | 15.8% | 24.7% | 22.0% |
| NAV2          | 89797  | 18.8% | 23.8% | 23.3% | 22.0% |
| DLG1          | 1739   | 23.6% | 25.8% | 16.5% | 22.0% |
| LOC374768     | 374768 | 11.7% | 20.6% | 33.5% | 22.0% |
| CHTF18        | 63922  | 32.4% | 20.4% | 13.1% | 22.0% |
| DKFZP564D0478 | 84065  | 26.3% | 15.3% | 24.3% | 22.0% |
| LOC387601     | 387601 | 22.0% | 24.8% | 19.1% | 22.0% |
| GSDM          | 284110 | 15.4% | 24.0% | 26.5% | 22.0% |
| EXOSC8        | 11340  | 20.0% | 22.0% | 23.9% | 22.0% |
| LOC387775     | 387775 | 17.9% | 18.3% | 29.8% | 22.0% |
| GUK1          | 2987   | 26.9% | 18.1% | 20.9% | 22.0% |
| JPH4          | 84502  | 28.0% | 23.4% | 14.5% | 22.0% |
| LRRC6         | 23639  | 23.2% | 15.2% | 27.5% | 22.0% |
| FLJ25952      | 253832 | 18.7% | 18.8% | 28.4% | 22.0% |
| GTF3C3        | 9330   | 28.6% | 15.2% | 22.1% | 22.0% |
| CDH18         | 1016   | 25.4% | 18.2% | 22.2% | 22.0% |
| RHPN2         | 85415  | 28.0% | 18.7% | 19.2% | 22.0% |
| RNF215        | 200312 | 26.4% | 19.7% | 19.8% | 22.0% |
| IQSEC3        | 440073 | 30.2% | 9.1%  | 26.7% | 22.0% |
| PTPN23        | 25930  | 25.4% | 22.2% | 18.3% | 22.0% |
| C13ORF11      | 55002  | 24.8% | 19.8% | 21.3% | 22.0% |
| TTMP          | 79669  | 14.7% | 25.3% | 26.0% | 22.0% |
| EPAS1         | 2034   | 33.8% | 11.5% | 20.6% | 22.0% |
| PELO          | 53918  | 30.8% | 12.1% | 23.0% | 22.0% |
| BTBD3         | 22903  | 18.2% | 20.8% | 26.9% | 22.0% |
| DHRS6         | 56898  | 34.2% | 15.5% | 16.3% | 22.0% |
| MYL4          | 4635   | 26.4% | 17.4% | 22.1% | 22.0% |
| SELB          | 60678  | 25.6% | 23.9% | 16.4% | 22.0% |
| LOC124411     | 124411 | 20.1% | 18.7% | 27.1% | 22.0% |
| ABCC11        | 85320  | 24.7% | 19.6% | 21.6% | 22.0% |
| C6ORF205      | 394263 | 22.9% | 28.9% | 14.2% | 22.0% |
| MGC12981      | 84317  | 16.3% | 26.2% | 23.5% | 22.0% |
| HCFC1         | 3054   | 27.6% | 17.8% | 20.5% | 22.0% |
| ANXA6         | 309    | 18.3% | 17.8% | 29.9% | 22.0% |
| UGT1A9        | 54600  | 32.4% | 12.8% | 20.7% | 22.0% |
| AKAP3         | 10566  | 35.4% | 14.4% | 16.2% | 22.0% |
| KIAA0657      | 23363  | 25.9% | 13.8% | 26.2% | 22.0% |
| FLJ38615      | 161502 | 20.8% | 20.7% | 24.4% | 22.0% |
| CYB561D2      | 11068  | 27.7% | 24.1% | 14.1% | 22.0% |
| LOC124976     | 124976 | 22.3% | 20.0% | 23.6% | 22.0% |
| KIAA0649      | 9858   | 25.0% | 23.1% | 17.9% | 22.0% |
| DKFZP434E2321 | 91409  | 20.1% | 16.6% | 29.3% | 22.0% |
| HOMER1        | 9456   | 23.7% | 20.8% | 21.5% | 22.0% |
| APOF          | 319    | 19.1% | 21.2% | 25.6% | 22.0% |
| IL7R          | 3575   | 30.7% | 18.2% | 17.0% | 22.0% |
| PROSC         | 11212  | 29.7% | 21.1% | 15.2% | 22.0% |
| FLJ46838      | 440865 | 24.8% | 18.5% | 22.6% | 22.0% |
| HDGF2         | 84717  | 20.9% | 16.0% | 29.1% | 22.0% |
| GRLF1         | 2909   | 16.9% | 26.3% | 22.8% | 22.0% |
| PHKG1         | 5260   | 25.0% | 23.0% | 18.0% | 22.0% |
| OR114         | 254973 | 23.3% | 23.0% | 19.7% | 22.0% |
| CD244         | 51744  | 38.1% | 5.8%  | 22.1% | 22.0% |
| JAK1          | 3716   | 18.2% | 34.6% | 13.2% | 22.0% |
| FLJ32702      | 123775 | 14.6% | 20.9% | 30.4% | 22.0% |
| IGFBP2        | 3485   | 35.2% | 9.6%  | 21.2% | 22.0% |
| ILT7          | 23547  | 15.7% | 17.6% | 32.7% | 22.0% |
| OR9K2         | 441639 | 30.7% | 18.1% | 17.2% | 22.0% |
| WNT1          | 7471   | 25.0% | 15.7% | 25.3% | 22.0% |
| FOXD4B        | 349334 | 23.2% | 20.3% | 22.5% | 22.0% |
| FBXO7         | 25793  | 26.0% | 18.8% | 21.1% | 22.0% |
| GTDC1         | 79712  | 31.0% | 18.8% | 16.2% | 22.0% |
| C14ORF87      | 51218  | 17.7% | 20.5% | 27.8% | 22.0% |
| MGC33488      | 90326  | 21.9% | 15.3% | 28.9% | 22.0% |
| GABRA5        | 2558   | 28.1% | 9.5%  | 28.5% | 22.0% |
| LOC285908     | 285908 | 25.7% | 16.2% | 24.2% | 22.0% |
| FLJ40869      | 348654 | 22.8% | 15.5% | 27.6% | 22.0% |
| G1P3          | 2537   | 23.0% | 18.3% | 24.7% | 22.0% |
| LYZL2         | 119180 | 26.1% | 17.4% | 22.5% | 22.0% |
| FLJ22329      | 79709  | 22.7% | 14.9% | 28.4% | 22.0% |
| ST18          | 9705   | 36.8% | 7.6%  | 21.7% | 22.0% |
| PKIA          | 5569   | 19.3% | 22.8% | 23.9% | 22.0% |
| GAS7          | 8522   | 35.1% | 13.2% | 17.7% | 22.0% |
| L1CAM         | 3897   | 16.2% | 25.1% | 24.8% | 22.0% |
| TUBE1         | 51175  | 26.1% | 18.6% | 21.3% | 22.0% |
| LOC642446     | 642446 | 30.0% | 17.1% | 18.9% | 22.0% |
| CA2           | 760    | 39.6% | 10.9% | 15.5% | 22.0% |
| ARK5          | 9891   | 15.4% | 29.7% | 20.9% | 22.0% |
| REPS1         | 85021  | 22.8% | 15.5% | 27.7% | 22.0% |
| TRIM60        | 166655 | 21.9% | 22.0% | 22.2% | 22.0% |
| LOC388969     | 388969 | 24.8% | 9.7%  | 31.6% | 22.0% |
| CCNH          | 902    | 35.3% | 10.5% | 20.2% | 22.0% |
| CGI-127       | 51646  | 16.6% | 15.3% | 34.1% | 22.0% |
| LOC440087     | 440087 | 16.8% | 21.8% | 27.5% | 22.0% |
| C9ORF48       | 347240 | 40.9% | 10.1% | 15.1% | 22.0% |
| LOC388649     | 388649 | 18.6% | 20.4% | 27.1% | 22.0% |
| CYP3A5        | 1577   | 21.9% | 22.7% | 21.5% | 22.0% |
| LGALS2        | 3957   | 20.1% | 25.2% | 20.8% | 22.0% |
| PTGIS         | 5740   | 28.7% | 19.1% | 18.2% | 22.0% |
| RP11-31H15.5  | 442444 | 24.3% | 19.3% | 22.5% | 22.0% |
| ARAF1         | 369    | 20.6% | 25.8% | 19.7% | 22.0% |
| MARCH6        | 10299  | 26.2% | 20.4% | 19.4% | 22.0% |
| AP1B1         | 162    | 34.8% | 12.1% | 19.1% | 22.0% |
| MGC35212      | 254528 | 28.6% | 9.6%  | 28.0% | 22.0% |
| MGC33864      | 151188 | 24.5% | 11.2% | 30.4% | 22.0% |
| FLJ14146      | 79762  | 21.5% | 24.1% | 20.5% | 22.0% |
| LGALS9        | 3965   | 39.2% | 14.5% | 12.4% | 22.0% |

|              |        |       |       |       |       |
|--------------|--------|-------|-------|-------|-------|
| HRASLS       | 57110  | 23.4% | 21.2% | 21.5% | 22.0% |
| FLJ13941     | 79906  | 20.8% | 21.8% | 23.5% | 22.0% |
| PPAP2A       | 8611   | 19.8% | 25.9% | 20.4% | 22.0% |
| NRIP2        | 83714  | 29.4% | 12.2% | 24.5% | 22.0% |
| EGLN2        | 112398 | 20.5% | 20.3% | 25.2% | 22.0% |
| USP18        | 11274  | 22.9% | 26.5% | 16.7% | 22.0% |
| TNRC11       | 9968   | 21.0% | 18.5% | 26.7% | 22.0% |
| VENTX2       | 27287  | 35.4% | 17.5% | 13.2% | 22.0% |
| DZIP1        | 22873  | 28.0% | 21.5% | 16.6% | 22.0% |
| LOC122258    | 122258 | 20.7% | 19.3% | 26.1% | 22.0% |
| OR6C70       | 390327 | 17.4% | 24.5% | 24.2% | 22.0% |
| DKFZP434K046 | 57017  | 20.6% | 19.1% | 26.5% | 22.0% |
| OR2T1        | 266996 | 25.1% | 22.4% | 18.6% | 22.0% |
| SUV39H2      | 79723  | 36.0% | 10.8% | 19.3% | 22.0% |
| ACVRL1       | 94     | 21.9% | 23.6% | 20.6% | 22.0% |
| MGC15763     | 92106  | 28.5% | 12.3% | 25.4% | 22.0% |
| FLJ13841     | 79755  | 19.6% | 15.7% | 30.8% | 22.0% |
| DNB5         | 50651  | 24.8% | 16.7% | 24.6% | 22.0% |
| MAML1        | 9794   | 20.9% | 19.9% | 25.3% | 22.0% |
| GPR114       | 221188 | 31.8% | 19.3% | 15.0% | 22.0% |
| FLJ35802     | 168975 | 22.0% | 19.0% | 25.2% | 22.0% |
| FLJ22794     | 63901  | 12.0% | 18.4% | 35.7% | 22.0% |
| ETEA         | 23197  | 26.3% | 11.7% | 28.2% | 22.1% |
| NR1D1        | 9572   | 27.4% | 17.1% | 21.6% | 22.1% |
| SIGLEC5      | 8778   | 23.1% | 18.9% | 24.2% | 22.1% |
| NUP155       | 9631   | 28.7% | 11.0% | 26.5% | 22.1% |
| HEXB         | 3074   | 37.7% | 8.2%  | 20.3% | 22.1% |
| OR2B3        | 442184 | 33.8% | 19.0% | 13.4% | 22.1% |
| CDT6         | 10218  | 23.6% | 16.8% | 25.8% | 22.1% |
| TRPA1        | 8989   | 30.2% | 15.3% | 20.7% | 22.1% |
| LOC339210    | 339210 | 12.4% | 28.1% | 25.6% | 22.1% |
| NAPB         | 63908  | 32.8% | 16.8% | 16.5% | 22.1% |
| TGFB1        | 7040   | 15.1% | 25.0% | 26.1% | 22.1% |
| MGC13186     | 84284  | 20.4% | 13.4% | 32.4% | 22.1% |
| ASAH1        | 27163  | 21.3% | 19.4% | 25.5% | 22.1% |
| SRPUL        | 27286  | 19.9% | 17.6% | 28.7% | 22.1% |
| FLJ22457     | 79961  | 21.9% | 20.0% | 24.3% | 22.1% |
| CPSF6        | 11052  | 14.8% | 26.3% | 25.0% | 22.1% |
| FAM11A       | 84548  | 11.4% | 23.4% | 31.3% | 22.1% |
| MUTED        | 63915  | 28.0% | 17.2% | 21.0% | 22.1% |
| ORSD14       | 219436 | 31.3% | 18.8% | 16.0% | 22.1% |
| FLJ12571     | 79989  | 27.7% | 12.2% | 26.3% | 22.1% |
| FLJ44060     | 346288 | 12.7% | 25.4% | 28.1% | 22.1% |
| LIR9         | 353514 | 16.9% | 27.5% | 21.8% | 22.1% |
| FLJ10587     | 55181  | 9.3%  | 23.5% | 33.3% | 22.1% |
| OR56A4       | 120793 | 26.3% | 14.8% | 25.1% | 22.1% |
| ACTL6        | 51412  | 17.0% | 30.0% | 19.2% | 22.1% |
| DDAH2        | 23564  | 23.6% | 18.3% | 24.3% | 22.1% |
| C9ORF85      | 138241 | 21.3% | 16.8% | 28.2% | 22.1% |
| TNFRSF13B    | 23495  | 21.0% | 20.2% | 25.0% | 22.1% |
| BGR          | 81616  | 24.8% | 25.4% | 16.0% | 22.1% |
| ARHGAP28     | 79822  | 21.0% | 24.7% | 20.6% | 22.1% |
| RPS6KA1      | 6195   | 18.2% | 25.4% | 22.7% | 22.1% |
| KIAA1432     | 57589  | 35.4% | 11.8% | 19.0% | 22.1% |
| GPD1L        | 23171  | 27.3% | 26.8% | 12.1% | 22.1% |
| LOC388659    | 284611 | 23.6% | 14.1% | 28.6% | 22.1% |
| FLJ11175     | 55784  | 28.4% | 8.5%  | 29.3% | 22.1% |
| KRTAP1-5     | 83895  | 30.5% | 11.2% | 24.5% | 22.1% |
| RAI14        | 26064  | 16.0% | 29.1% | 21.2% | 22.1% |
| FLJ20273     | 54502  | 28.2% | 19.1% | 18.9% | 22.1% |
| DIRAS1       | 148252 | 21.9% | 27.2% | 17.1% | 22.1% |
| FLJ20054     | 54530  | 24.8% | 18.7% | 22.8% | 22.1% |
| WIT-1        | 51352  | 15.5% | 10.6% | 40.1% | 22.1% |
| MGC35033     | 121273 | 26.3% | 19.2% | 20.7% | 22.1% |
| SLC16A13     | 201232 | 28.6% | 17.6% | 20.0% | 22.1% |
| LPXN         | 9404   | 22.4% | 10.5% | 33.3% | 22.1% |
| PKNOX2       | 63876  | 21.8% | 18.8% | 25.7% | 22.1% |
| RBPSUHL      | 11317  | 24.5% | 21.7% | 20.1% | 22.1% |
| UNQ2446      | 123904 | 23.8% | 11.1% | 31.4% | 22.1% |
| EPS15        | 2060   | 18.2% | 28.6% | 19.5% | 22.1% |
| PPM1E        | 22843  | 19.9% | 29.2% | 17.2% | 22.1% |
| FLJ10826     | 55239  | 15.9% | 32.6% | 17.8% | 22.1% |
| FLJ13291     | 84138  | 19.9% | 11.2% | 35.3% | 22.1% |
| FGFR1OP2     | 26127  | 22.8% | 20.5% | 23.0% | 22.1% |
| MOBK12C      | 148932 | 33.3% | 17.3% | 15.7% | 22.1% |
| EPB41        | 2035   | 19.6% | 17.7% | 29.0% | 22.1% |
| KIAA1950     | 155185 | 13.5% | 15.9% | 36.9% | 22.1% |
| MSC          | 9242   | 21.1% | 21.4% | 23.7% | 22.1% |
| ASMTL        | 8623   | 29.9% | 15.0% | 21.4% | 22.1% |
| FBXO32       | 114907 | 22.6% | 22.3% | 21.5% | 22.1% |
| CPEB1        | 64506  | 24.8% | 13.7% | 27.8% | 22.1% |
| PACS1        | 55690  | 28.5% | 17.3% | 20.6% | 22.1% |
| PBP          | 5037   | 21.2% | 16.0% | 29.2% | 22.1% |
| MYOM2        | 9172   | 18.6% | 21.6% | 26.2% | 22.1% |
| DOK1         | 1796   | 14.7% | 30.0% | 21.6% | 22.1% |
| GPR148       | 344561 | 21.7% | 23.6% | 20.9% | 22.1% |
| TRAF1        | 7185   | 22.6% | 21.3% | 22.5% | 22.1% |
| DRIM         | 27340  | 24.9% | 21.3% | 20.1% | 22.1% |
| SMCR7        | 125170 | 25.0% | 24.8% | 16.5% | 22.1% |
| ZNF234       | 10780  | 19.7% | 28.6% | 18.1% | 22.1% |
| SLC25A31     | 83447  | 7.9%  | 28.5% | 29.9% | 22.1% |
| ZMAT4        | 79698  | 27.0% | 24.8% | 14.5% | 22.1% |
| MJD          | 4287   | 28.8% | 13.1% | 24.5% | 22.1% |
| PDZK2        | 79849  | 17.9% | 20.9% | 27.5% | 22.1% |
| GTF2H4       | 2968   | 27.0% | 21.8% | 17.6% | 22.1% |
| ETV2         | 2116   | 35.8% | 15.8% | 14.7% | 22.1% |
| MGC47816     | 284716 | 27.9% | 11.8% | 26.7% | 22.1% |
| PSCDBP       | 9595   | 21.4% | 18.6% | 26.4% | 22.1% |

|               |        |       |       |       |       |
|---------------|--------|-------|-------|-------|-------|
| SNX16         | 64089  | 14.0% | 26.6% | 25.8% | 22.1% |
| SLC2A11       | 66035  | 28.6% | 18.7% | 19.1% | 22.1% |
| C4ORF9        | 8602   | 14.1% | 33.3% | 19.0% | 22.1% |
| HMX2          | 3167   | 26.9% | 22.8% | 16.7% | 22.1% |
| MERTK         | 10461  | 19.4% | 27.4% | 19.6% | 22.1% |
| C1QB          | 713    | 18.8% | 33.3% | 14.3% | 22.1% |
| SYTL1         | 84958  | 32.8% | 18.8% | 14.7% | 22.1% |
| SCG2          | 7857   | 29.1% | 20.2% | 17.1% | 22.1% |
| SCARB2        | 950    | 26.1% | 20.2% | 20.1% | 22.1% |
| LOC653659     | 653659 | 22.6% | 19.4% | 24.4% | 22.1% |
| OR2L3         | 391192 | 31.3% | 18.0% | 17.2% | 22.1% |
| C14ORF127     | 80224  | 12.8% | 12.1% | 41.4% | 22.1% |
| FLJ45459      | 127687 | 19.6% | 14.3% | 32.5% | 22.1% |
| TBX1          | 6899   | 30.1% | 9.5%  | 26.9% | 22.1% |
| MAGEC2        | 51438  | 15.4% | 22.5% | 28.5% | 22.1% |
| UGT2B28       | 54490  | 35.5% | 17.1% | 13.8% | 22.1% |
| MVP           | 9961   | 24.7% | 18.0% | 23.7% | 22.1% |
| C20ORF172     | 79980  | 21.1% | 20.2% | 25.1% | 22.1% |
| CAMKIIALPHA   | 55450  | 27.8% | 18.3% | 20.3% | 22.1% |
| UNQ5783       | 388325 | 14.5% | 20.0% | 32.0% | 22.1% |
| NFKBIE        | 4794   | 38.1% | 10.9% | 17.4% | 22.1% |
| FKBP5         | 2289   | 23.6% | 17.1% | 25.8% | 22.1% |
| LOC404636     | 404636 | 15.7% | 20.9% | 29.8% | 22.1% |
| BTNL9         | 153579 | 24.8% | 26.4% | 15.2% | 22.1% |
| BPIL2         | 254240 | 24.1% | 28.4% | 13.9% | 22.1% |
| GOLGIN-67     | 23015  | 22.7% | 16.1% | 27.7% | 22.1% |
| SERHL         | 94009  | 18.4% | 23.2% | 24.8% | 22.1% |
| GALGT2        | 124872 | 28.7% | 13.9% | 23.8% | 22.1% |
| TMEM30B       | 161291 | 26.6% | 20.8% | 19.1% | 22.1% |
| LOC390110     | 390110 | 27.0% | 22.4% | 17.0% | 22.1% |
| ANUB1         | 93550  | 11.9% | 30.4% | 24.1% | 22.1% |
| AMN           | 81693  | 27.0% | 22.4% | 17.0% | 22.1% |
| FLJ40298      | 129852 | 31.9% | 18.1% | 16.4% | 22.1% |
| PNLDC1        | 154197 | 35.2% | 11.7% | 19.5% | 22.1% |
| DDX28         | 55794  | 30.2% | 16.7% | 19.6% | 22.1% |
| PPARA         | 5465   | 18.0% | 14.3% | 34.1% | 22.1% |
| METTL1        | 4234   | 27.6% | 11.2% | 27.6% | 22.1% |
| LPFR2         | 64748  | 28.9% | 20.9% | 16.7% | 22.1% |
| KMO           | 8564   | 25.4% | 18.6% | 22.6% | 22.2% |
| B3GALT7       | 374907 | 20.2% | 23.5% | 22.8% | 22.2% |
| GPR4          | 2828   | 18.6% | 19.9% | 27.9% | 22.2% |
| MYC           | 4609   | 20.8% | 21.8% | 23.9% | 22.2% |
| PPP1R16A      | 84988  | 30.4% | 14.7% | 21.4% | 22.2% |
| PKP3          | 11187  | 13.0% | 23.9% | 29.5% | 22.2% |
| OR1E1         | 8387   | 27.6% | 23.5% | 15.5% | 22.2% |
| DIAPH3        | 81624  | 29.5% | 15.6% | 21.5% | 22.2% |
| PDE4C         | 5143   | 19.9% | 22.0% | 24.6% | 22.2% |
| LKAP          | 9665   | 16.2% | 22.4% | 27.9% | 22.2% |
| C6ORF60       | 79632  | 25.4% | 22.8% | 18.3% | 22.2% |
| PCAF          | 8850   | 17.3% | 21.7% | 27.5% | 22.2% |
| DKFZP761P211  | 375057 | 25.5% | 12.2% | 28.8% | 22.2% |
| GTFC4         | 9329   | 27.5% | 21.5% | 17.5% | 22.2% |
| NFIX          | 4784   | 43.1% | 9.9%  | 13.5% | 22.2% |
| FLJ23342      | 79684  | 21.5% | 18.9% | 26.1% | 22.2% |
| FAP           | 2191   | 26.8% | 16.6% | 23.1% | 22.2% |
| DKFZP586D0919 | 25895  | 12.9% | 12.2% | 41.4% | 22.2% |
| DECR1         | 1666   | 16.3% | 27.8% | 22.4% | 22.2% |
| C2ORF3        | 6936   | 20.0% | 17.9% | 28.6% | 22.2% |
| TCFL5         | 10732  | 22.6% | 28.5% | 15.4% | 22.2% |
| HSPB2         | 3316   | 29.4% | 20.1% | 17.0% | 22.2% |
| TMEM16F       | 196527 | 16.7% | 27.2% | 22.7% | 22.2% |
| PDLM4         | 8572   | 22.8% | 23.7% | 20.1% | 22.2% |
| PAIP1         | 10605  | 28.8% | 22.7% | 15.1% | 22.2% |
| DGKG          | 1608   | 28.3% | 14.3% | 24.0% | 22.2% |
| SMURF2        | 64750  | 31.8% | 14.6% | 20.2% | 22.2% |
| STAF42        | 117143 | 21.3% | 17.2% | 28.0% | 22.2% |
| KRT25D        | 162605 | 19.9% | 22.7% | 24.0% | 22.2% |
| LOC389932     | 389932 | 31.4% | 11.1% | 24.1% | 22.2% |
| RC3H1         | 149041 | 34.8% | 11.6% | 20.1% | 22.2% |
| BPGM          | 669    | 31.6% | 16.5% | 18.5% | 22.2% |
| EF1B2         | 1933   | 25.8% | 24.4% | 16.4% | 22.2% |
| RFXANK        | 8625   | 21.9% | 19.3% | 25.4% | 22.2% |
| MRPL47        | 57129  | 15.9% | 21.5% | 29.2% | 22.2% |
| SULT1A3       | 6818   | 31.9% | 16.2% | 18.4% | 22.2% |
| MGC27169      | 338094 | 21.7% | 12.7% | 32.1% | 22.2% |
| HIST2H2BE     | 8349   | 31.7% | 14.8% | 20.1% | 22.2% |
| MAPK12        | 6300   | 13.8% | 32.1% | 20.6% | 22.2% |
| TJP2          | 9414   | 17.0% | 24.5% | 25.1% | 22.2% |
| APEX2         | 27301  | 23.2% | 22.6% | 20.8% | 22.2% |
| SPEC1         | 56882  | 26.2% | 8.5%  | 31.9% | 22.2% |
| A1BG          | 1      | 17.8% | 30.0% | 18.8% | 22.2% |
| RPE65         | 6121   | 22.9% | 22.3% | 21.4% | 22.2% |
| SIN3B         | 23309  | 25.4% | 23.8% | 17.4% | 22.2% |
| MRE11A        | 4361   | 23.8% | 19.9% | 22.9% | 22.2% |
| HUMAGCCB      | 29890  | 11.6% | 17.4% | 37.6% | 22.2% |
| RBAF600       | 23352  | 23.5% | 9.2%  | 34.0% | 22.2% |
| SHB           | 6461   | 27.5% | 21.9% | 17.2% | 22.2% |
| MGC20470      | 143630 | 14.2% | 20.0% | 32.4% | 22.2% |
| FLJ14154      | 79903  | 30.4% | 22.2% | 14.0% | 22.2% |
| GPR77         | 27202  | 25.2% | 14.1% | 27.4% | 22.2% |
| PGAM4         | 441531 | 21.5% | 26.4% | 18.7% | 22.2% |
| AFM           | 173    | 22.5% | 20.4% | 23.8% | 22.2% |
| PTD004        | 29789  | 11.7% | 24.2% | 30.7% | 22.2% |
| FLJ30707      | 220108 | 25.8% | 22.3% | 18.5% | 22.2% |
| PIPSK2C       | 79837  | 17.5% | 28.3% | 20.8% | 22.2% |
| KLK11         | 11012  | 25.9% | 23.7% | 17.0% | 22.2% |
| TXNDC3        | 51314  | 23.1% | 25.7% | 17.8% | 22.2% |
| SP4           | 6671   | 33.3% | 14.7% | 18.6% | 22.2% |

|              |           |       |       |       |       |
|--------------|-----------|-------|-------|-------|-------|
| APOBEC1      | 339       | 24.2% | 18.7% | 23.7% | 22.2% |
| TRIM71       | 131405    | 23.6% | 20.1% | 22.9% | 22.2% |
| LY64         | 4064      | 24.5% | 16.7% | 25.4% | 22.2% |
| PARD6B       | 84612     | 18.6% | 24.2% | 23.8% | 22.2% |
| CBFA2T3      | 863       | 16.7% | 0.0%  | 50.0% | 22.2% |
| TDRKH        | 11022     | 35.5% | 14.2% | 17.0% | 22.2% |
| TOP1         | 7150      | 30.0% | 14.3% | 22.4% | 22.2% |
| TCF7         | 6932      | 27.6% | 10.6% | 28.5% | 22.2% |
| GPR55        | 9290      | 20.9% | 22.1% | 23.6% | 22.2% |
| LOC199675    | 199675    | 25.5% | 16.1% | 25.1% | 22.2% |
| ZAK          | 51776     | 23.4% | 27.6% | 15.7% | 22.2% |
| MEGF10       | 84466     | 12.8% | 29.0% | 24.8% | 22.2% |
| LACRT        | 90070     | 20.0% | 23.5% | 23.2% | 22.2% |
| LOR          | 4014      | 39.3% | 11.6% | 15.7% | 22.2% |
| LOC388381    | 388381    | 33.8% | 23.3% | 9.6%  | 22.2% |
| ICK          | 22858     | 18.6% | 28.8% | 19.3% | 22.2% |
| HEPN1        | 641654    | 13.6% | 30.6% | 22.5% | 22.2% |
| PTE1         | 10005     | 25.5% | 23.0% | 18.2% | 22.2% |
| ZNF717       | 100131827 | 15.0% | 21.0% | 30.7% | 22.2% |
| WASF1        | 8936      | 20.4% | 20.2% | 26.2% | 22.2% |
| ABCA12       | 26154     | 25.9% | 23.3% | 17.5% | 22.2% |
| GPR39        | 2863      | 32.6% | 10.7% | 23.4% | 22.2% |
| NOL8         | 55035     | 26.6% | 22.0% | 18.2% | 22.2% |
| ADK          | 132       | 27.9% | 18.3% | 20.5% | 22.2% |
| DKFZP4340047 | 26083     | 33.1% | 13.3% | 20.4% | 22.2% |
| ZPBP2        | 124626    | 16.4% | 20.8% | 29.5% | 22.2% |
| PDE1B        | 5153      | 26.5% | 9.1%  | 31.1% | 22.2% |
| ZP1          | 22917     | 11.8% | 21.5% | 33.4% | 22.2% |
| TARSL1       | 80222     | 22.3% | 14.8% | 29.7% | 22.3% |
| GLRB         | 2743      | 27.5% | 12.9% | 26.4% | 22.3% |
| ASPSCR1      | 79058     | 33.6% | 14.7% | 18.5% | 22.3% |
| DKFZP434M202 | 126668    | 16.3% | 31.5% | 18.9% | 22.3% |
| MBD6         | 114785    | 25.0% | 25.2% | 16.5% | 22.3% |
| NEIL2        | 252969    | 21.7% | 18.8% | 26.3% | 22.3% |
| RAB37        | 326624    | 29.8% | 17.2% | 19.8% | 22.3% |
| PUNC         | 9543      | 24.0% | 16.1% | 26.7% | 22.3% |
| MC1R         | 4157      | 21.3% | 19.0% | 26.5% | 22.3% |
| GH2          | 2689      | 27.9% | 21.0% | 17.9% | 22.3% |
| MGC14126     | 84984     | 16.6% | 17.3% | 32.9% | 22.3% |
| RNF8         | 9025      | 22.3% | 20.4% | 24.0% | 22.3% |
| BBS2         | 583       | 24.6% | 14.8% | 27.4% | 22.3% |
| STK22C       | 81629     | 34.7% | 15.2% | 16.9% | 22.3% |
| PGLYRP3      | 114771    | 23.0% | 16.9% | 26.9% | 22.3% |
| PCF          | 5199      | 11.6% | 17.3% | 37.9% | 22.3% |
| TTID         | 9499      | 20.1% | 19.5% | 27.1% | 22.3% |
| ZZZ3         | 26009     | 30.4% | 18.9% | 17.5% | 22.3% |
| FLJ12592     | 84129     | 28.4% | 21.7% | 16.7% | 22.3% |
| AP1GBP1      | 11276     | 20.6% | 21.9% | 24.2% | 22.3% |
| GJA1         | 2697      | 37.2% | 11.3% | 18.3% | 22.3% |
| CXCL16       | 58191     | 27.7% | 14.3% | 24.8% | 22.3% |
| SLC8A2       | 6543      | 25.9% | 15.0% | 25.9% | 22.3% |
| ARFIP1       | 27236     | 24.6% | 20.6% | 21.6% | 22.3% |
| WDR11        | 55717     | 17.7% | 14.3% | 34.8% | 22.3% |
| KBTBD2       | 25948     | 28.8% | 14.6% | 23.5% | 22.3% |
| LOC253827    | 253827    | 19.8% | 21.8% | 25.3% | 22.3% |
| DOK4         | 55715     | 16.0% | 30.1% | 20.7% | 22.3% |
| SPINT3       | 10816     | 16.4% | 23.1% | 27.3% | 22.3% |
| LTB4DH       | 22949     | 21.2% | 23.4% | 22.2% | 22.3% |
| TRIM44       | 54765     | 27.2% | 16.8% | 22.8% | 22.3% |
| RAVER1       | 125950    | 29.3% | 20.9% | 16.6% | 22.3% |
| KCNN3        | 3782      | 27.6% | 11.6% | 27.6% | 22.3% |
| AQP8         | 343       | 37.3% | 19.2% | 10.3% | 22.3% |
| DEFA3        | 1668      | 26.2% | 22.2% | 18.5% | 22.3% |
| TAF5         | 6877      | 21.4% | 18.3% | 27.1% | 22.3% |
| KLF13        | 51621     | 30.9% | 15.0% | 20.9% | 22.3% |
| ACVR1B       | 91        | 17.4% | 21.4% | 28.1% | 22.3% |
| CAP2         | 10486     | 13.7% | 27.3% | 25.8% | 22.3% |
| FIGNL1       | 63979     | 20.0% | 20.8% | 26.1% | 22.3% |
| TAS2R10      | 50839     | 16.7% | 28.6% | 21.6% | 22.3% |
| ZIC5         | 85416     | 25.3% | 20.5% | 21.1% | 22.3% |
| PRKCL2       | 5586      | 23.0% | 23.9% | 20.0% | 22.3% |
| PFDN1        | 5201      | 29.1% | 14.5% | 23.2% | 22.3% |
| LOC729747    | 729747    | 21.7% | 17.1% | 28.0% | 22.3% |
| FLJ21415     | 79794     | 28.8% | 5.8%  | 32.3% | 22.3% |
| C6ORF151     | 154007    | 23.2% | 15.1% | 28.6% | 22.3% |
| PKNOX1       | 5316      | 21.5% | 22.2% | 23.1% | 22.3% |
| PRKCABP      | 9463      | 21.9% | 16.3% | 28.7% | 22.3% |
| LECT1        | 11061     | 25.2% | 15.6% | 26.1% | 22.3% |
| DKFZP761H039 | 55530     | 28.0% | 17.3% | 21.5% | 22.3% |
| GUCY2D       | 3000      | 31.2% | 19.6% | 16.1% | 22.3% |
| PRSS15       | 9361      | 19.0% | 0.0%  | 47.8% | 22.3% |
| PARK7        | 11315     | 38.2% | 10.0% | 18.7% | 22.3% |
| OR2A4        | 79541     | 25.6% | 19.0% | 22.4% | 22.3% |
| C11ORF4      | 56834     | 18.2% | 21.4% | 27.3% | 22.3% |
| GSTT1        | 2952      | 30.8% | 17.8% | 18.2% | 22.3% |
| LOC340843    | 340843    | 24.4% | 17.4% | 25.1% | 22.3% |
| LOC120224    | 120224    | 13.7% | 18.0% | 35.2% | 22.3% |
| MARK2        | 2011      | 24.2% | 20.5% | 22.1% | 22.3% |
| ZNF572       | 137209    | 28.6% | 14.9% | 23.5% | 22.3% |
| LOC339105    | 339105    | 23.8% | 19.8% | 23.3% | 22.3% |
| PRKRIP1      | 79706     | 23.0% | 17.8% | 26.2% | 22.3% |
| LOC493856    | 493856    | 25.1% | 22.0% | 19.8% | 22.3% |
| FLJ32447     | 151278    | 20.0% | 19.3% | 27.6% | 22.3% |
| MAMDC1       | 161357    | 14.4% | 16.7% | 35.8% | 22.3% |
| MSRB         | 22921     | 23.5% | 20.9% | 22.4% | 22.3% |
| CCL4         | 6351      | 29.4% | 0.0%  | 37.5% | 22.3% |
| HSPC023      | 28974     | 20.9% | 17.1% | 28.9% | 22.3% |
| EFG2         | 84340     | 22.4% | 18.8% | 25.7% | 22.3% |

|              |        |       |       |       |       |
|--------------|--------|-------|-------|-------|-------|
| CAT          | 847    | 15.9% | 28.7% | 22.4% | 22.3% |
| LOC643812    | 643812 | 19.0% | 22.0% | 25.9% | 22.3% |
| SERPINB12    | 89777  | 26.3% | 20.6% | 19.9% | 22.3% |
| C1orf162     | 128346 | 16.4% | 16.0% | 34.5% | 22.3% |
| PS1D         | 51538  | 24.0% | 13.3% | 29.7% | 22.3% |
| LOC93081     | 93081  | 8.9%  | 21.1% | 36.9% | 22.3% |
| SCAND1       | 51282  | 37.8% | 18.2% | 11.0% | 22.3% |
| LOC93109     | 93109  | 18.1% | 26.3% | 22.5% | 22.3% |
| CMRF35       | 10871  | 27.0% | 15.8% | 24.1% | 22.3% |
| UBE1L2       | 55236  | 24.8% | 19.9% | 22.3% | 22.3% |
| MSR1         | 4481   | 26.4% | 13.8% | 26.7% | 22.3% |
| NOX1         | 27035  | 21.9% | 20.2% | 24.9% | 22.3% |
| RARSL        | 57038  | 35.7% | 18.5% | 12.8% | 22.3% |
| ACBD4        | 79777  | 27.2% | 10.4% | 29.3% | 22.3% |
| PSMD10       | 5716   | 23.5% | 19.2% | 24.2% | 22.3% |
| ORS2A1       | 23538  | 27.9% | 20.8% | 18.3% | 22.3% |
| LOC345557    | 345557 | 20.8% | 25.9% | 20.3% | 22.3% |
| NPTX1        | 4884   | 29.5% | 11.5% | 25.9% | 22.3% |
| RBPMS2       | 348093 | 20.1% | 20.8% | 26.1% | 22.3% |
| SAMD8        | 142891 | 37.5% | 20.4% | 9.1%  | 22.3% |
| FZD7         | 8324   | 20.4% | 25.8% | 20.7% | 22.3% |
| TERF2IP      | 54386  | 24.1% | 18.3% | 24.5% | 22.3% |
| C2ORF24      | 27013  | 20.2% | 27.8% | 18.9% | 22.3% |
| C2ORF32      | 25927  | 21.3% | 20.7% | 25.0% | 22.3% |
| FAT4         | 79633  | 30.3% | 16.1% | 20.5% | 22.3% |
| LRRC15       | 131578 | 20.5% | 10.9% | 35.5% | 22.3% |
| GTF2IRD2     | 84163  | 23.5% | 23.1% | 20.4% | 22.3% |
| CDC14B       | 8555   | 27.4% | 19.8% | 19.8% | 22.3% |
| ORS5M10      | 390167 | 30.8% | 21.4% | 14.9% | 22.3% |
| LRRC2        | 79442  | 25.9% | 13.4% | 27.7% | 22.3% |
| PDCL         | 5082   | 29.7% | 6.3%  | 31.0% | 22.3% |
| BOC          | 91653  | 34.4% | 4.8%  | 27.8% | 22.3% |
| SH3BGR12     | 83699  | 27.0% | 14.3% | 25.7% | 22.3% |
| OR4A5        | 81318  | 17.5% | 23.1% | 26.4% | 22.3% |
| CXCL14       | 9547   | 31.9% | 14.6% | 20.5% | 22.3% |
| CTEN         | 84951  | 15.8% | 27.7% | 23.6% | 22.3% |
| PNLIPRP2     | 5408   | 22.9% | 17.7% | 26.4% | 22.3% |
| RGL3         | 57139  | 28.9% | 16.9% | 21.2% | 22.3% |
| SOX9         | 6662   | 34.5% | 13.9% | 18.6% | 22.3% |
| CSRP2BP      | 57325  | 21.2% | 24.2% | 21.7% | 22.3% |
| HIST2HZAB    | 317772 | 32.5% | 9.1%  | 25.5% | 22.3% |
| LTB4R        | 1241   | 9.3%  | 26.1% | 31.6% | 22.3% |
| PLP2         | 5355   | 25.9% | 20.7% | 20.4% | 22.3% |
| ALDH3A2      | 224    | 26.3% | 13.4% | 27.3% | 22.3% |
| TRIM37       | 4591   | 24.2% | 18.7% | 24.2% | 22.3% |
| FLJ39647     | 284099 | 25.8% | 18.2% | 23.0% | 22.3% |
| MCRS1        | 10445  | 17.7% | 15.1% | 34.2% | 22.3% |
| KIAA0368     | 23392  | 32.5% | 10.2% | 24.3% | 22.3% |
| HOKA4        | 3201   | 24.7% | 12.7% | 29.6% | 22.3% |
| C14ORF68     | 283600 | 36.6% | 10.3% | 20.2% | 22.3% |
| MATN4        | 8785   | 15.8% | 18.5% | 32.8% | 22.3% |
| KIAA1040     | 23041  | 13.6% | 30.3% | 23.2% | 22.4% |
| PTPDC1       | 138639 | 20.1% | 25.4% | 21.5% | 22.4% |
| LOC51057     | 51057  | 20.7% | 21.7% | 24.7% | 22.4% |
| ZNF281       | 23528  | 27.5% | 24.4% | 15.2% | 22.4% |
| LOC90799     | 90799  | 20.3% | 15.5% | 31.3% | 22.4% |
| GPHB5        | 122876 | 20.2% | 25.8% | 21.1% | 22.4% |
| PGLYRP4      | 57115  | 32.8% | 16.5% | 17.7% | 22.4% |
| ZNF256       | 10172  | 16.7% | 26.7% | 23.7% | 22.4% |
| NGLY1        | 55768  | 20.4% | 13.2% | 33.5% | 22.4% |
| TRIM11       | 81559  | 27.8% | 10.6% | 28.7% | 22.4% |
| HCA127       | 55906  | 29.3% | 15.9% | 21.9% | 22.4% |
| MGCS1025     | 353149 | 28.0% | 17.9% | 21.1% | 22.4% |
| HMCN1        | 83872  | 23.3% | 16.0% | 27.8% | 22.4% |
| IL1R2        | 7850   | 28.3% | 19.0% | 19.8% | 22.4% |
| LISCH7       | 51599  | 23.5% | 22.9% | 20.7% | 22.4% |
| CMYA3        | 129446 | 25.6% | 19.1% | 22.4% | 22.4% |
| CTXL         | 23584  | 24.3% | 25.0% | 17.8% | 22.4% |
| CRY2         | 1408   | 24.5% | 18.2% | 24.5% | 22.4% |
| TERT         | 7015   | 24.6% | 20.4% | 22.1% | 22.4% |
| H2AFB        | 83740  | 29.3% | 7.8%  | 30.0% | 22.4% |
| AASDHPPT     | 60496  | 19.8% | 21.8% | 25.4% | 22.4% |
| C9ORF55      | 55667  | 17.8% | 15.4% | 34.0% | 22.4% |
| FLJ39660     | 284992 | 27.0% | 20.2% | 19.8% | 22.4% |
| STK17A       | 9263   | 21.5% | 23.7% | 21.9% | 22.4% |
| SCRN2        | 90507  | 21.8% | 19.9% | 25.3% | 22.4% |
| CACNA1F      | 778    | 23.6% | 17.3% | 26.2% | 22.4% |
| DNALI1       | 7802   | 18.8% | 24.6% | 23.7% | 22.4% |
| KRTAP5-8     | 57830  | 28.0% | 21.7% | 17.4% | 22.4% |
| APOA1BP      | 128240 | 32.1% | 14.4% | 20.7% | 22.4% |
| F11R         | 50848  | 32.9% | 16.1% | 18.2% | 22.4% |
| FLJ20130     | 54830  | 20.4% | 13.7% | 33.0% | 22.4% |
| LYAR         | 55646  | 31.0% | 18.4% | 17.7% | 22.4% |
| LPA          | 4018   | 30.5% | 17.6% | 19.0% | 22.4% |
| SSR3         | 6747   | 25.4% | 23.9% | 17.8% | 22.4% |
| RIS1         | 25907  | 16.0% | 15.0% | 36.2% | 22.4% |
| PCDHGB7      | 56099  | 35.1% | 15.0% | 17.0% | 22.4% |
| UGT2B7       | 7364   | 38.4% | 14.7% | 14.0% | 22.4% |
| OGDHL        | 55753  | 33.3% | 19.1% | 14.7% | 22.4% |
| SH3TC1       | 54436  | 25.9% | 21.3% | 19.9% | 22.4% |
| SCT          | 6343   | 23.3% | 25.9% | 17.9% | 22.4% |
| SORCS3       | 22986  | 23.3% | 20.3% | 23.5% | 22.4% |
| PDIK1L       | 149420 | 20.2% | 22.7% | 24.2% | 22.4% |
| MGCS0104     | 341032 | 14.1% | 19.1% | 33.9% | 22.4% |
| IPLA2(GAMMA) | 50640  | 34.9% | 11.6% | 20.7% | 22.4% |
| DCTN4        | 51164  | 19.1% | 22.7% | 25.4% | 22.4% |
| GPLD1        | 2822   | 17.4% | 13.5% | 36.3% | 22.4% |
| FDFT1        | 2222   | 23.7% | 23.2% | 20.3% | 22.4% |

|               |        |       |       |       |       |
|---------------|--------|-------|-------|-------|-------|
| FBXL14        | 144699 | 25.2% | 15.6% | 26.3% | 22.4% |
| APOC1         | 341    | 30.5% | 19.4% | 17.2% | 22.4% |
| SPOCK3        | 50859  | 35.1% | 11.3% | 20.8% | 22.4% |
| PKD1L1        | 168507 | 35.6% | 21.8% | 9.7%  | 22.4% |
| CDC42EP3      | 10602  | 26.1% | 23.3% | 17.7% | 22.4% |
| CD44          | 960    | 38.5% | 19.8% | 8.9%  | 22.4% |
| C14ORF138     | 79609  | 30.6% | 17.1% | 19.6% | 22.4% |
| ABHD3         | 171586 | 33.0% | 10.5% | 23.6% | 22.4% |
| LOC339398     | 339398 | 15.2% | 17.6% | 34.4% | 22.4% |
| EMID2         | 136227 | 28.1% | 24.0% | 15.1% | 22.4% |
| KIAA0562      | 9731   | 25.8% | 14.8% | 26.6% | 22.4% |
| AHR           | 196    | 21.5% | 24.7% | 20.9% | 22.4% |
| LPAL2         | 80350  | 40.8% | 26.4% | 0.0%  | 22.4% |
| PHF8          | 23133  | 26.7% | 24.1% | 16.3% | 22.4% |
| LYPLAL1       | 127018 | 20.0% | 19.9% | 27.2% | 22.4% |
| DTX4          | 23220  | 25.0% | 19.9% | 22.3% | 22.4% |
| BCKDHB        | 594    | 19.7% | 28.6% | 18.9% | 22.4% |
| DET1          | 55070  | 29.0% | 14.6% | 23.6% | 22.4% |
| YWHAE         | 7531   | 25.5% | 19.2% | 22.5% | 22.4% |
| VPS54         | 51542  | 24.5% | 22.3% | 20.4% | 22.4% |
| LRRC39        | 127495 | 16.7% | 25.8% | 24.8% | 22.4% |
| CD1C          | 911    | 22.9% | 23.8% | 20.5% | 22.4% |
| FLJ32370      | 137695 | 25.1% | 19.2% | 22.9% | 22.4% |
| DKFZP434B168  | 25896  | 28.6% | 16.1% | 22.5% | 22.4% |
| KBTBD3        | 143879 | 27.2% | 27.6% | 12.4% | 22.4% |
| CDS2          | 8760   | 24.9% | 17.9% | 24.4% | 22.4% |
| JBROD1        | 154214 | 20.4% | 21.4% | 25.3% | 22.4% |
| HSD17B8       | 7923   | 40.5% | 8.5%  | 18.2% | 22.4% |
| PCGF1         | 84759  | 26.6% | 18.9% | 21.7% | 22.4% |
| LASS5         | 91012  | 19.6% | 20.6% | 27.0% | 22.4% |
| MFAP3L        | 9848   | 26.5% | 25.0% | 15.7% | 22.4% |
| PADI4         | 23569  | 41.2% | 10.4% | 15.6% | 22.4% |
| KRTAP3-1      | 83896  | 24.4% | 21.5% | 21.4% | 22.4% |
| AGTRL1        | 187    | 20.5% | 20.8% | 25.9% | 22.4% |
| MGC10993      | 80775  | 25.7% | 19.8% | 21.8% | 22.4% |
| SCN7A         | 6332   | 16.7% | 19.0% | 31.6% | 22.4% |
| ENTPD6        | 955    | 25.1% | 23.8% | 18.4% | 22.4% |
| ANKRD17       | 26057  | 28.1% | 19.1% | 20.1% | 22.4% |
| FLJ23375      | 80021  | 31.3% | 13.9% | 22.0% | 22.4% |
| C10ORF25      | 220979 | 19.1% | 27.2% | 21.0% | 22.4% |
| ROPN1         | 54763  | 26.9% | 14.4% | 25.9% | 22.4% |
| AKIP          | 54998  | 23.7% | 24.8% | 18.8% | 22.4% |
| KLC2          | 64837  | 21.8% | 23.4% | 22.0% | 22.4% |
| BACH1         | 571    | 27.9% | 16.8% | 22.6% | 22.4% |
| LOC90637      | 90637  | 18.7% | 21.3% | 27.3% | 22.4% |
| DNAJB8        | 165721 | 23.8% | 18.4% | 25.1% | 22.4% |
| HOXD10        | 3236   | 32.0% | 20.2% | 15.1% | 22.4% |
| NFIA          | 4774   | 23.1% | 16.4% | 27.8% | 22.4% |
| POLR2K        | 5440   | 45.7% | 6.2%  | 15.4% | 22.4% |
| TXNDC8        | 255220 | 23.9% | 9.0%  | 34.4% | 22.4% |
| SULT1C1       | 6819   | 23.8% | 14.9% | 28.6% | 22.4% |
| LOC390874     | 390874 | 18.0% | 17.8% | 31.5% | 22.4% |
| TCF2          | 6928   | 29.1% | 18.5% | 19.7% | 22.4% |
| MBC2          | 23344  | 16.7% | 22.5% | 28.0% | 22.4% |
| FOXD4L5       | 653427 | 28.8% | 23.2% | 15.3% | 22.4% |
| CBFB          | 865    | 28.0% | 18.1% | 21.2% | 22.4% |
| NGEF          | 25791  | 24.6% | 19.6% | 23.1% | 22.4% |
| CSRP2         | 1466   | 22.2% | 21.6% | 23.5% | 22.4% |
| SPPL2B        | 56928  | 26.7% | 24.7% | 16.0% | 22.4% |
| USP3          | 9960   | 23.2% | 16.2% | 27.9% | 22.4% |
| HKR2          | 342945 | 21.8% | 22.4% | 23.1% | 22.4% |
| MGC5356       | 79025  | 16.7% | 13.4% | 37.3% | 22.4% |
| MRPS28        | 28957  | 12.0% | 27.3% | 28.0% | 22.4% |
| NHS           | 4810   | 33.7% | 22.2% | 11.5% | 22.4% |
| CAMK2G        | 818    | 23.3% | 24.2% | 19.9% | 22.4% |
| SLCO3A1       | 28232  | 23.3% | 25.3% | 18.7% | 22.5% |
| SUGT1         | 10910  | 37.6% | 16.8% | 13.0% | 22.5% |
| HSPC065       | 29070  | 20.4% | 13.2% | 33.7% | 22.5% |
| HSPASBP1      | 54972  | 21.2% | 12.5% | 33.7% | 22.5% |
| HCAP-G        | 64151  | 16.5% | 17.3% | 33.6% | 22.5% |
| IL12B         | 3593   | 19.9% | 27.8% | 19.7% | 22.5% |
| MIRAB13       | 85377  | 21.1% | 22.4% | 23.8% | 22.5% |
| FLI42526      | 222194 | 18.3% | 8.7%  | 40.4% | 22.5% |
| EME2          | 197342 | 29.3% | 19.4% | 18.7% | 22.5% |
| TST           | 7263   | 35.4% | 3.4%  | 28.5% | 22.5% |
| PHF17         | 79960  | 29.3% | 17.9% | 20.1% | 22.5% |
| C22ORF4       | 25771  | 18.1% | 18.1% | 31.2% | 22.5% |
| ADCK4         | 79934  | 23.1% | 24.4% | 19.9% | 22.5% |
| DEFB1         | 1672   | 24.3% | 11.9% | 31.2% | 22.5% |
| SPCS3         | 60559  | 15.9% | 27.0% | 24.5% | 22.5% |
| RBM11         | 54033  | 29.4% | 18.1% | 19.9% | 22.5% |
| LOC90355      | 90355  | 22.0% | 14.9% | 30.5% | 22.5% |
| LOC441027     | 441027 | 19.5% | 9.1%  | 38.8% | 22.5% |
| SCHIP1        | 29970  | 22.2% | 22.4% | 22.7% | 22.5% |
| CACNG6        | 59285  | 22.0% | 23.6% | 21.8% | 22.5% |
| PDGFRL        | 5157   | 20.3% | 24.2% | 22.9% | 22.5% |
| LOC388610     | 388610 | 19.3% | 24.9% | 23.2% | 22.5% |
| FBXL19        | 54620  | 30.2% | 9.7%  | 27.5% | 22.5% |
| OPN1MW2       | 728458 | 16.2% | 23.1% | 28.1% | 22.5% |
| DEFB137       | 613210 | 31.0% | 20.3% | 16.1% | 22.5% |
| RASSF6        | 166824 | 23.1% | 22.8% | 21.5% | 22.5% |
| RNASE2        | 6036   | 28.5% | 16.0% | 22.8% | 22.5% |
| LOC153364     | 153364 | 20.3% | 27.8% | 19.3% | 22.5% |
| TMOD1         | 7111   | 16.7% | 26.5% | 24.3% | 22.5% |
| TLOC1         | 7095   | 18.8% | 20.7% | 27.9% | 22.5% |
| DKFZP547K1113 | 374655 | 17.2% | 15.1% | 35.2% | 22.5% |
| SLITRK1       | 114798 | 23.4% | 25.9% | 18.1% | 22.5% |
| UGT2B15       | 7366   | 25.2% | 16.4% | 25.8% | 22.5% |

|              |           |       |       |       |       |
|--------------|-----------|-------|-------|-------|-------|
| SERPIN2      | 5055      | 21.8% | 24.9% | 20.7% | 22.5% |
| MGC49942     | 124944    | 16.1% | 23.6% | 27.7% | 22.5% |
| DOK5         | 55816     | 28.3% | 22.1% | 17.0% | 22.5% |
| CPEB3        | 22849     | 35.9% | 11.8% | 19.7% | 22.5% |
| FLJ10178     | 55086     | 12.8% | 20.1% | 34.6% | 22.5% |
| ET           | 79157     | 25.3% | 7.5%  | 34.6% | 22.5% |
| UEVLD        | 55293     | 30.3% | 14.0% | 23.2% | 22.5% |
| TIC          | 23550     | 26.8% | 14.5% | 26.1% | 22.5% |
| FLJ37970     | 283234    | 25.5% | 19.3% | 22.7% | 22.5% |
| HSA275986    | 55802     | 18.9% | 18.7% | 29.9% | 22.5% |
| LOC92558     | 92558     | 19.8% | 18.4% | 29.3% | 22.5% |
| TUBB2        | 10383     | 23.9% | 21.5% | 22.0% | 22.5% |
| C14ORF118    | 55668     | 37.3% | 16.5% | 13.7% | 22.5% |
| TAF2         | 338811    | 16.0% | 15.3% | 36.2% | 22.5% |
| HIST1H2BG    | 8339      | 19.0% | 19.7% | 28.7% | 22.5% |
| KPNA1        | 3836      | 23.9% | 13.0% | 30.5% | 22.5% |
| CPA1         | 1357      | 29.3% | 25.7% | 12.4% | 22.5% |
| ACRBP        | 84519     | 19.2% | 22.8% | 25.4% | 22.5% |
| FLJ35976     | 284618    | 15.4% | 16.8% | 35.3% | 22.5% |
| LOC390688    | 390688    | 33.3% | 17.7% | 16.5% | 22.5% |
| RDBP         | 7936      | 22.8% | 26.8% | 17.9% | 22.5% |
| C20ORF30     | 29058     | 36.4% | 9.1%  | 22.0% | 22.5% |
| PCDH17       | 27253     | 18.0% | 26.5% | 23.0% | 22.5% |
| ZNF208       | 7757      | 23.6% | 19.1% | 24.8% | 22.5% |
| AD-003       | 28989     | 18.3% | 25.3% | 23.9% | 22.5% |
| FOX1         | 2297      | 31.1% | 23.5% | 12.9% | 22.5% |
| SLC35A2      | 7355      | 23.1% | 17.3% | 27.1% | 22.5% |
| CREB3L2      | 64764     | 26.9% | 24.2% | 16.4% | 22.5% |
| C13ORF7      | 79596     | 25.5% | 18.7% | 23.3% | 22.5% |
| HNRPA2B1     | 3181      | 30.1% | 13.8% | 23.6% | 22.5% |
| LOC134147    | 134147    | 31.4% | 19.4% | 16.7% | 22.5% |
| LOC253982    | 253982    | 20.7% | 29.2% | 17.6% | 22.5% |
| MGC48625     | 342926    | 22.9% | 10.9% | 33.7% | 22.5% |
| ODF1         | 4956      | 28.4% | 19.7% | 19.4% | 22.5% |
| TSLP         | 85480     | 35.4% | 14.3% | 17.8% | 22.5% |
| TRPV4        | 59341     | 45.3% | 12.5% | 9.7%  | 22.5% |
| SLC1A3       | 6507      | 24.6% | 21.8% | 21.1% | 22.5% |
| MAN2A1       | 4124      | 20.7% | 19.0% | 27.8% | 22.5% |
| DKFZP761C169 | 65056     | 21.1% | 15.5% | 31.0% | 22.5% |
| DPYSL4       | 10570     | 23.8% | 25.8% | 18.0% | 22.5% |
| OPN3         | 23596     | 26.8% | 20.8% | 19.9% | 22.5% |
| HTR3A        | 3359      | 27.8% | 17.5% | 22.2% | 22.5% |
| KCNA5        | 3741      | 30.5% | 20.6% | 16.4% | 22.5% |
| APOBEC3C     | 27350     | 37.7% | 10.4% | 19.4% | 22.5% |
| TPK1         | 27010     | 28.9% | 16.3% | 22.3% | 22.5% |
| NARF         | 26502     | 33.6% | 10.7% | 23.2% | 22.5% |
| IKBK1        | 8517      | 21.6% | 25.0% | 20.9% | 22.5% |
| INPP4B       | 8821      | 17.4% | 24.8% | 25.4% | 22.5% |
| SPANXB2      | 100133171 | 14.9% | 25.4% | 27.3% | 22.5% |
| SRPX         | 8406      | 32.5% | 12.0% | 23.1% | 22.5% |
| AMY1C        | 278       | 18.2% | 28.1% | 21.3% | 22.5% |
| FCN2         | 2220      | 33.3% | 10.8% | 23.4% | 22.5% |
| CBX7         | 23492     | 32.6% | 16.7% | 18.3% | 22.5% |
| PGM2L1       | 283209    | 26.2% | 19.7% | 21.7% | 22.5% |
| FLJ21128     | 80153     | 23.0% | 12.6% | 32.0% | 22.5% |
| LY9          | 4063      | 20.7% | 17.8% | 29.1% | 22.5% |
| UNQ1849      | 253558    | 30.6% | 17.8% | 19.2% | 22.5% |
| AK3L2        | 387851    | 15.8% | 27.4% | 24.3% | 22.5% |
| FCGR3B       | 2215      | 24.0% | 21.7% | 21.9% | 22.5% |
| MGC31963     | 112770    | 17.3% | 24.1% | 26.2% | 22.5% |
| ATP8A2       | 51761     | 25.2% | 21.5% | 20.8% | 22.5% |
| FLJ21749     | 80194     | 27.1% | 21.2% | 19.3% | 22.5% |
| SH2D2A       | 9047      | 28.6% | 17.2% | 21.8% | 22.5% |
| LSM3         | 27258     | 43.3% | 6.7%  | 17.6% | 22.5% |
| PPP1R3B      | 79660     | 25.8% | 17.9% | 23.9% | 22.5% |
| CACNB4       | 785       | 22.5% | 11.4% | 33.7% | 22.5% |
| IL22RA2      | 116379    | 30.1% | 20.6% | 16.9% | 22.5% |
| ZNF192       | 7745      | 15.6% | 28.4% | 23.6% | 22.5% |
| MGC33600     | 202500    | 17.4% | 36.4% | 13.8% | 22.5% |
| VPS29        | 51699     | 32.5% | 15.2% | 19.8% | 22.5% |
| KCNK3        | 3777      | 22.6% | 18.8% | 26.3% | 22.5% |
| SUCLG1       | 8802      | 33.3% | 14.9% | 19.4% | 22.5% |
| FLJ23790     | 157769    | 20.4% | 16.7% | 30.5% | 22.5% |
| C20ORF29     | 55317     | 25.7% | 18.1% | 23.9% | 22.5% |
| FLJ22679     | 84187     | 17.3% | 17.4% | 32.9% | 22.5% |
| HSPC111      | 51491     | 21.1% | 24.3% | 22.2% | 22.5% |
| BUB1         | 699       | 15.2% | 21.6% | 30.8% | 22.5% |
| MAP1D        | 254042    | 26.1% | 24.1% | 17.4% | 22.5% |
| PTX1         | 51290     | 16.5% | 24.0% | 27.1% | 22.5% |
| STMN2        | 11075     | 27.0% | 19.1% | 21.5% | 22.5% |
| TRIM72       | 493829    | 24.1% | 25.2% | 18.3% | 22.5% |
| MGC57359     | 441272    | 21.2% | 27.6% | 18.9% | 22.5% |
| NOS2A        | 4843      | 28.5% | 16.3% | 22.8% | 22.5% |
| PPIE         | 10450     | 25.6% | 24.6% | 17.4% | 22.6% |
| C19ORF27     | 81926     | 20.3% | 21.9% | 25.5% | 22.6% |
| FLJ45235     | 339416    | 22.6% | 20.8% | 24.3% | 22.6% |
| POLB         | 5423      | 25.6% | 23.4% | 18.6% | 22.6% |
| EMX2         | 2018      | 21.7% | 16.8% | 29.2% | 22.6% |
| MANSC1       | 54682     | 29.9% | 17.6% | 20.2% | 22.6% |
| STARD7       | 56910     | 28.7% | 19.2% | 19.8% | 22.6% |
| MGC17330     | 113791    | 22.6% | 14.5% | 30.5% | 22.6% |
| SLC9A4       | 389015    | 27.1% | 28.0% | 12.6% | 22.6% |
| LOC126075    | 126075    | 40.7% | 9.9%  | 17.1% | 22.6% |
| AHSG         | 197       | 28.2% | 19.8% | 19.6% | 22.6% |
| DSC1         | 1823      | 22.1% | 20.2% | 25.4% | 22.6% |
| GUCA1A       | 2978      | 25.9% | 18.4% | 23.3% | 22.6% |
| NUDT4        | 11163     | 21.2% | 26.8% | 19.6% | 22.6% |
| ADA          | 100       | 27.7% | 21.6% | 18.3% | 22.6% |

|              |           |       |       |       |       |
|--------------|-----------|-------|-------|-------|-------|
| ROBO4        | 54538     | 24.0% | 21.1% | 22.5% | 22.6% |
| SLC30A2      | 7780      | 28.1% | 16.8% | 22.8% | 22.6% |
| MLL2         | 8085      | 22.8% | 15.8% | 29.1% | 22.6% |
| MGC13183     | 84318     | 21.7% | 18.7% | 27.4% | 22.6% |
| PRCD         | 768206    | 27.3% | 19.5% | 20.9% | 22.6% |
| BICD1        | 636       | 33.0% | 16.1% | 18.6% | 22.6% |
| DAB1         | 1600      | 31.0% | 13.5% | 23.2% | 22.6% |
| LOC390231    | 390231    | 29.3% | 14.0% | 24.5% | 22.6% |
| C20ORF100    | 84969     | 15.0% | 11.1% | 41.6% | 22.6% |
| MGC24039     | 160518    | 36.3% | 10.0% | 21.4% | 22.6% |
| MGC10485     | 112936    | 17.8% | 12.2% | 37.7% | 22.6% |
| REP15        | 387849    | 12.9% | 25.6% | 29.2% | 22.6% |
| LOC283130    | 283130    | 25.6% | 12.8% | 29.4% | 22.6% |
| LOC340654    | 340654    | 26.3% | 26.4% | 15.0% | 22.6% |
| FLJ38991     | 285521    | 14.3% | 23.3% | 30.2% | 22.6% |
| NPM2         | 10361     | 31.2% | 19.4% | 17.1% | 22.6% |
| FBS1         | 64319     | 22.9% | 15.3% | 29.6% | 22.6% |
| SLAC2-B      | 23086     | 30.5% | 12.5% | 24.7% | 22.6% |
| ATP10A       | 57194     | 40.4% | 15.5% | 11.9% | 22.6% |
| HADH5C       | 3033      | 25.1% | 16.0% | 26.6% | 22.6% |
| GPR172A      | 79581     | 32.4% | 14.0% | 21.3% | 22.6% |
| PMP2         | 5375      | 27.4% | 20.7% | 19.8% | 22.6% |
| FLJ32679     | 440321    | 27.1% | 16.4% | 24.2% | 22.6% |
| OR2W5        | 441932    | 27.1% | 19.3% | 21.4% | 22.6% |
| ASF1B        | 55723     | 32.4% | 14.3% | 21.1% | 22.6% |
| TAPBPL       | 55080     | 28.6% | 16.5% | 22.7% | 22.6% |
| MAPK10       | 5602      | 20.4% | 30.1% | 17.2% | 22.6% |
| LOC400451    | 400451    | 28.0% | 24.2% | 15.6% | 22.6% |
| DRD1         | 1812      | 20.3% | 24.1% | 23.3% | 22.6% |
| SELO         | 83642     | 27.2% | 12.8% | 27.8% | 22.6% |
| C16ORF33     | 79622     | 31.4% | 14.0% | 22.3% | 22.6% |
| PTPRT        | 11122     | 24.4% | 24.1% | 19.3% | 22.6% |
| C9orf106     | 414318    | 15.7% | 27.8% | 24.3% | 22.6% |
| RIOK3        | 8780      | 21.1% | 27.5% | 19.2% | 22.6% |
| ZNFN1A5      | 64376     | 20.2% | 19.1% | 28.4% | 22.6% |
| ASPN         | 54829     | 19.2% | 23.1% | 25.5% | 22.6% |
| LOC100129550 | 100129550 | 27.2% | 23.5% | 17.1% | 22.6% |
| AP1M1        | 8907      | 19.5% | 26.9% | 21.4% | 22.6% |
| MOGAT2       | 80168     | 26.2% | 17.2% | 24.4% | 22.6% |
| C10ORF92     | 54777     | 35.2% | 22.0% | 10.6% | 22.6% |
| C20ORF65     | 149699    | 14.1% | 23.5% | 30.2% | 22.6% |
| ABCD3        | 5825      | 30.6% | 11.7% | 25.5% | 22.6% |
| C14ORF160    | 79944     | 25.8% | 22.1% | 19.9% | 22.6% |
| OR5A2        | 219981    | 34.2% | 22.3% | 11.3% | 22.6% |
| FBXW12       | 285231    | 25.2% | 16.4% | 26.2% | 22.6% |
| UBE1DC1      | 79876     | 22.4% | 14.0% | 31.3% | 22.6% |
| PPP1R3A      | 5506      | 30.5% | 19.4% | 17.9% | 22.6% |
| NFKBIB       | 4793      | 23.2% | 20.6% | 24.0% | 22.6% |
| TBN          | 129685    | 36.0% | 12.0% | 19.8% | 22.6% |
| APOA4        | 337       | 34.9% | 9.2%  | 23.8% | 22.6% |
| PARK2        | 5071      | 27.5% | 17.8% | 22.5% | 22.6% |
| TNFRSF11A    | 8792      | 27.6% | 13.5% | 26.6% | 22.6% |
| RSHL2        | 83861     | 26.9% | 7.6%  | 33.3% | 22.6% |
| C9ORF84      | 158401    | 39.7% | 14.2% | 13.9% | 22.6% |
| TCEB2        | 6923      | 40.8% | 11.3% | 15.7% | 22.6% |
| C2ORF11      | 130132    | 24.5% | 9.3%  | 34.1% | 22.6% |
| PTPN11       | 5781      | 27.1% | 27.1% | 13.6% | 22.6% |
| CYP4A11      | 1579      | 30.7% | 14.5% | 22.7% | 22.6% |
| COMT1D1      | 118881    | 17.2% | 24.1% | 26.5% | 22.6% |
| MLSTD2       | 84188     | 31.2% | 20.1% | 16.6% | 22.6% |
| C21ORF25     | 25966     | 28.2% | 21.0% | 18.7% | 22.6% |
| FLJ25371     | 152940    | 27.9% | 24.6% | 15.4% | 22.6% |
| ST3GAL6      | 10402     | 17.2% | 20.7% | 30.0% | 22.6% |
| PRKY         | 5616      | 16.8% | 26.2% | 24.9% | 22.6% |
| C9ORF66      | 157983    | 26.2% | 17.5% | 24.2% | 22.6% |
| AIM1         | 202       | 30.6% | 19.5% | 17.7% | 22.6% |
| CUL1         | 8454      | 20.0% | 21.2% | 26.7% | 22.6% |
| FKBP1A       | 2280      | 28.3% | 17.9% | 21.7% | 22.6% |
| FLJ23560     | 79738     | 25.4% | 14.0% | 28.5% | 22.6% |
| OR11H12      | 440153    | 23.8% | 23.3% | 20.8% | 22.6% |
| AGXT         | 189       | 25.4% | 20.0% | 22.5% | 22.6% |
| KIAA2010     | 55671     | 22.3% | 14.6% | 31.0% | 22.6% |
| SFRS12       | 140890    | 27.8% | 25.8% | 14.3% | 22.6% |
| B4GALT1      | 2683      | 38.8% | 5.1%  | 24.0% | 22.6% |
| GADD45GIP1   | 90480     | 42.0% | 21.0% | 4.9%  | 22.6% |
| CNN3         | 1266      | 30.8% | 18.0% | 19.1% | 22.6% |
| SLC36A3      | 285641    | 30.6% | 13.2% | 24.0% | 22.6% |
| TGM7         | 116179    | 21.4% | 17.8% | 28.7% | 22.6% |
| COLEC12      | 81035     | 35.6% | 14.2% | 18.0% | 22.6% |
| LOC91614     | 91614     | 21.7% | 16.5% | 29.7% | 22.6% |
| DKFZP566M114 | 84068     | 23.7% | 20.6% | 23.7% | 22.6% |
| OR10A6       | 390093    | 30.8% | 13.2% | 23.9% | 22.6% |
| CLNS1A       | 1207      | 23.2% | 21.4% | 23.3% | 22.6% |
| DBCCR1L      | 339479    | 22.4% | 23.2% | 22.4% | 22.6% |
| BCCIP        | 56647     | 23.8% | 19.8% | 24.3% | 22.6% |
| RABL2A       | 11159     | 28.2% | 23.8% | 15.9% | 22.6% |
| GADD45A      | 1647      | 20.1% | 26.2% | 21.5% | 22.6% |
| MHC2TA       | 4261      | 30.7% | 16.1% | 21.1% | 22.6% |
| PDHB         | 5162      | 24.4% | 16.9% | 26.6% | 22.6% |
| PLAT         | 5327      | 26.6% | 24.6% | 16.7% | 22.6% |
| LOC164395    | 164395    | 20.1% | 24.1% | 23.8% | 22.6% |
| IL28RA       | 163702    | 27.6% | 16.0% | 24.4% | 22.6% |
| GABRE        | 2564      | 25.5% | 19.7% | 22.7% | 22.6% |
| TNFRSF11B    | 4982      | 21.4% | 21.8% | 24.7% | 22.6% |
| ITGB3BP      | 23421     | 16.7% | 23.3% | 27.9% | 22.6% |
| F13A1        | 2162      | 34.4% | 15.1% | 18.4% | 22.6% |
| KIAA1005     | 23322     | 17.5% | 20.9% | 29.5% | 22.6% |
| TAX1BP1      | 8887      | 17.9% | 23.0% | 27.0% | 22.6% |



|           |        |       |       |       |       |
|-----------|--------|-------|-------|-------|-------|
| DNASE1L2  | 1775   | 20.1% | 23.5% | 24.4% | 22.6% |
| ABCA2     | 20     | 40.4% | 13.3% | 14.3% | 22.6% |
| ORTA10    | 390892 | 26.1% | 13.9% | 28.0% | 22.6% |
| CKLF      | 51192  | 16.1% | 27.2% | 24.6% | 22.6% |
| CGB7      | 94027  | 19.0% | 20.4% | 28.5% | 22.6% |
| KRT4      | 3851   | 28.9% | 16.8% | 22.3% | 22.6% |
| SFMBT2    | 57713  | 22.4% | 25.0% | 20.5% | 22.6% |
| WHSC1     | 7468   | 17.8% | 22.5% | 27.7% | 22.7% |
| TIA1      | 7072   | 27.4% | 18.4% | 22.2% | 22.7% |
| MOBK1B    | 55233  | 11.1% | 20.0% | 36.8% | 22.7% |
| FLJ34588  | 221154 | 18.2% | 12.3% | 37.5% | 22.7% |
| ZNF85     | 7639   | 23.0% | 21.3% | 23.7% | 22.7% |
| NIP       | 90527  | 18.8% | 17.2% | 32.0% | 22.7% |
| FLJ10769  | 55739  | 19.4% | 22.5% | 26.0% | 22.7% |
| C15ORF12  | 55272  | 20.2% | 15.2% | 32.5% | 22.7% |
| MKRN2     | 23609  | 23.7% | 29.6% | 14.7% | 22.7% |
| PNMT      | 5409   | 30.3% | 25.0% | 12.7% | 22.7% |
| MGC2474   | 65988  | 28.5% | 20.4% | 19.0% | 22.7% |
| KPNA5     | 3841   | 26.7% | 25.1% | 16.2% | 22.7% |
| C1ORF37   | 92703  | 23.7% | 12.3% | 31.9% | 22.7% |
| UQCR      | 10975  | 21.4% | 25.3% | 21.2% | 22.7% |
| PIK3C3    | 5289   | 21.7% | 26.0% | 20.3% | 22.7% |
| SEC6L1    | 11336  | 20.6% | 17.8% | 29.7% | 22.7% |
| LOC284123 | 284123 | 19.7% | 13.3% | 34.9% | 22.7% |
| MAGEA2B   | 266740 | 22.4% | 14.7% | 30.9% | 22.7% |
| C14ORF119 | 55017  | 23.7% | 29.4% | 14.9% | 22.7% |
| TMEM10    | 93377  | 17.7% | 25.5% | 24.8% | 22.7% |
| ZNFN1A3   | 22806  | 26.3% | 14.4% | 27.3% | 22.7% |
| ADAM7     | 8756   | 23.6% | 31.1% | 13.3% | 22.7% |
| PPP3R2    | 5535   | 24.4% | 18.0% | 25.6% | 22.7% |
| C6ORF68   | 116150 | 20.2% | 15.0% | 32.8% | 22.7% |
| MAS1      | 4142   | 23.9% | 21.5% | 22.6% | 22.7% |
| C14ORF6   | 122651 | 17.8% | 12.4% | 37.8% | 22.7% |
| C20orf134 | 170487 | 29.4% | 12.8% | 25.8% | 22.7% |
| ZNF503    | 84858  | 35.1% | 11.6% | 21.3% | 22.7% |
| APRG1     | 339883 | 33.2% | 9.1%  | 25.8% | 22.7% |
| C4A       | 720    | 19.1% | 21.4% | 27.5% | 22.7% |
| GAGE8     | 26749  | 29.2% | 24.2% | 14.7% | 22.7% |
| PMS2L5    | 5383   | 30.2% | 15.6% | 22.2% | 22.7% |
| THEA      | 26027  | 29.5% | 27.5% | 11.1% | 22.7% |
| RBPSUH    | 3516   | 23.1% | 20.8% | 24.2% | 22.7% |
| OTOG      | 340990 | 25.9% | 21.0% | 21.2% | 22.7% |
| CHDH      | 55349  | 19.3% | 16.6% | 32.1% | 22.7% |
| CALU      | 813    | 18.0% | 25.3% | 24.8% | 22.7% |
| PAK4      | 10298  | 23.2% | 28.1% | 16.7% | 22.7% |
| GNPAT     | 8443   | 32.7% | 13.7% | 21.6% | 22.7% |
| CSDA      | 8531   | 27.2% | 20.0% | 20.8% | 22.7% |
| CCNG1     | 900    | 29.8% | 19.9% | 18.3% | 22.7% |
| PTPN1     | 5770   | 31.3% | 19.0% | 17.8% | 22.7% |
| RCOR1     | 23186  | 24.2% | 21.3% | 22.6% | 22.7% |
| GALE      | 2582   | 25.7% | 14.0% | 28.4% | 22.7% |
| HTRA3     | 94031  | 20.9% | 19.9% | 27.3% | 22.7% |
| HIST1H4H  | 8365   | 30.0% | 29.7% | 8.3%  | 22.7% |
| PIK4CB    | 5298   | 23.7% | 23.5% | 20.9% | 22.7% |
| PHF14     | 9678   | 23.2% | 22.6% | 22.3% | 22.7% |
| FLJ12681  | 64788  | 21.6% | 16.9% | 29.5% | 22.7% |
| OR1L3     | 26735  | 16.9% | 18.9% | 32.3% | 22.7% |
| FLJ10276  | 55108  | 19.5% | 21.4% | 27.1% | 22.7% |
| C10ORF48  | 283078 | 18.7% | 13.5% | 35.9% | 22.7% |
| HSPA12B   | 116835 | 22.1% | 24.9% | 21.1% | 22.7% |
| KIAA1115  | 22870  | 23.7% | 23.4% | 21.0% | 22.7% |
| PIGL      | 9487   | 23.3% | 20.0% | 24.8% | 22.7% |
| SARM1     | 23098  | 16.0% | 23.9% | 28.2% | 22.7% |
| C4ORF14   | 84273  | 39.2% | 12.0% | 17.0% | 22.7% |
| GTF2H3    | 2967   | 32.4% | 18.3% | 17.4% | 22.7% |
| CAMK2D    | 817    | 26.9% | 18.2% | 23.1% | 22.7% |
| ASTL      | 431705 | 31.7% | 13.6% | 22.8% | 22.7% |
| FKBP1B    | 2281   | 26.5% | 14.7% | 26.9% | 22.7% |
| LGALS3    | 3958   | 18.5% | 25.9% | 23.6% | 22.7% |
| ALG10     | 84920  | 21.4% | 22.8% | 23.9% | 22.7% |
| ACTN4     | 81     | 27.8% | 17.4% | 22.9% | 22.7% |
| XCL2      | 6846   | 25.2% | 28.0% | 14.9% | 22.7% |
| HLA-DRB5  | 3127   | 31.8% | 17.6% | 18.6% | 22.7% |
| LOC344191 | 344191 | 21.9% | 16.8% | 29.4% | 22.7% |
| FNDC3B    | 64778  | 24.7% | 20.4% | 23.0% | 22.7% |
| ARID2     | 196528 | 28.7% | 21.4% | 18.1% | 22.7% |
| HEAB      | 10978  | 40.0% | 5.8%  | 22.3% | 22.7% |
| FLJ33167  | 201973 | 21.0% | 17.9% | 29.2% | 22.7% |
| POLL      | 27343  | 35.1% | 17.7% | 15.4% | 22.7% |
| OR2A2     | 442361 | 17.2% | 30.8% | 20.1% | 22.7% |
| POLN      | 353497 | 36.0% | 10.6% | 21.5% | 22.7% |
| GP6       | 51206  | 30.7% | 7.9%  | 29.5% | 22.7% |
| FLJ44838  | 644767 | 22.5% | 16.4% | 29.2% | 22.7% |
| MGC4171   | 79153  | 24.3% | 24.0% | 19.8% | 22.7% |
| GARS      | 2617   | 21.0% | 20.8% | 26.3% | 22.7% |
| KIAA1411  | 57579  | 23.1% | 16.7% | 28.3% | 22.7% |
| FLJ40722  | 285966 | 23.1% | 20.2% | 24.9% | 22.7% |
| THBS2     | 7058   | 22.8% | 19.3% | 26.0% | 22.7% |
| OTX2      | 5015   | 22.4% | 20.4% | 25.4% | 22.7% |
| LONRF1    | 91694  | 28.7% | 20.4% | 19.1% | 22.7% |
| KIAA0196  | 9897   | 18.1% | 21.7% | 28.3% | 22.7% |
| FLJ33360  | 401172 | 21.5% | 23.6% | 23.1% | 22.7% |
| SOX3      | 6658   | 26.1% | 26.5% | 15.6% | 22.7% |
| FLJ33718  | 285489 | 18.3% | 14.3% | 35.6% | 22.7% |
| DAP13     | 55967  | 17.3% | 11.9% | 38.9% | 22.7% |
| ETV4      | 2118   | 35.5% | 21.5% | 11.1% | 22.7% |
| LOC401387 | 401387 | 27.4% | 20.8% | 20.0% | 22.7% |
| NR4A1     | 3164   | 37.5% | 16.8% | 13.9% | 22.7% |

|                |        |       |       |       |       |
|----------------|--------|-------|-------|-------|-------|
| SFRS11         | 9295   | 25.9% | 22.8% | 19.4% | 22.7% |
| GRM7           | 2917   | 21.9% | 21.9% | 24.4% | 22.7% |
| CHORDC1        | 26973  | 26.1% | 24.3% | 17.8% | 22.7% |
| MAOB           | 4129   | 21.3% | 24.2% | 22.7% | 22.7% |
| SSB            | 6741   | 30.0% | 18.2% | 20.0% | 22.7% |
| LEMD2          | 221496 | 34.9% | 16.7% | 16.6% | 22.7% |
| UNC93A         | 54346  | 25.4% | 22.3% | 20.5% | 22.7% |
| RHOH           | 399    | 24.1% | 18.0% | 26.1% | 22.7% |
| SOX15          | 6665   | 26.1% | 18.8% | 23.3% | 22.7% |
| ICOS           | 29851  | 37.7% | 6.5%  | 24.0% | 22.7% |
| FLJ11029       | 55771  | 26.8% | 12.0% | 29.4% | 22.7% |
| LOC284434      | 284434 | 24.3% | 9.0%  | 34.9% | 22.7% |
| PRAP1          | 118471 | 31.6% | 19.2% | 17.4% | 22.7% |
| FADS1          | 3992   | 29.8% | 12.2% | 26.2% | 22.7% |
| DKFZP586P0123  | 26005  | 6.1%  | 28.7% | 33.3% | 22.7% |
| G22P1          | 2547   | 31.7% | 13.5% | 23.0% | 22.7% |
| MPN            | 83886  | 28.6% | 29.5% | 10.1% | 22.7% |
| IMP5           | 162540 | 23.8% | 29.8% | 14.6% | 22.7% |
| KRTAP5-5       | 439915 | 17.0% | 23.2% | 28.0% | 22.7% |
| MYOM3          | 127294 | 29.2% | 14.3% | 24.7% | 22.7% |
| LOC790955      | 790955 | 17.7% | 27.5% | 23.0% | 22.7% |
| ITPA           | 3704   | 28.3% | 10.9% | 29.0% | 22.7% |
| FLJ25224       | 120406 | 19.6% | 12.0% | 36.6% | 22.7% |
| CS             | 1431   | 36.8% | 13.2% | 18.1% | 22.7% |
| BAG3           | 9531   | 35.5% | 21.4% | 11.3% | 22.7% |
| RAB41          | 347517 | 18.9% | 19.9% | 29.4% | 22.7% |
| LOC402573      | 402573 | 31.9% | 17.5% | 18.8% | 22.7% |
| DDIT3          | 1649   | 14.4% | 26.2% | 27.6% | 22.7% |
| USP48          | 84196  | 27.2% | 16.8% | 24.2% | 22.7% |
| TLR8           | 51311  | 22.0% | 23.7% | 22.5% | 22.7% |
| KIF18A         | 81930  | 29.1% | 20.2% | 19.0% | 22.7% |
| CLDN1          | 9076   | 22.4% | 15.7% | 30.2% | 22.7% |
| DHRS1          | 115817 | 26.7% | 16.0% | 25.5% | 22.7% |
| GALNT2         | 2590   | 28.1% | 14.6% | 25.5% | 22.7% |
| SPIN2          | 54466  | 19.9% | 8.9%  | 39.4% | 22.7% |
| BRPF1          | 7862   | 26.5% | 22.7% | 19.0% | 22.7% |
| CAPN9          | 10753  | 28.3% | 24.1% | 15.8% | 22.8% |
| FBXL5          | 26234  | 24.2% | 12.9% | 31.2% | 22.8% |
| ATG12          | 9140   | 29.7% | 23.0% | 15.6% | 22.8% |
| NFAM1          | 150372 | 22.3% | 29.6% | 16.4% | 22.8% |
| CASR           | 846    | 27.2% | 19.7% | 21.3% | 22.8% |
| OMG            | 4974   | 25.1% | 20.8% | 22.4% | 22.8% |
| ZNF202         | 7753   | 27.7% | 26.2% | 14.4% | 22.8% |
| FLJ22170       | 80169  | 23.2% | 15.6% | 29.5% | 22.8% |
| PPP1R16B       | 26051  | 24.2% | 27.8% | 16.3% | 22.8% |
| KRTAP9-2       | 83899  | 26.1% | 20.3% | 21.8% | 22.8% |
| LOC401509      | 401509 | 30.3% | 14.5% | 23.5% | 22.8% |
| GNA12          | 2768   | 29.2% | 17.3% | 21.8% | 22.8% |
| MYST2          | 11143  | 27.0% | 20.1% | 21.2% | 22.8% |
| AP1M2          | 10053  | 35.4% | 20.0% | 12.9% | 22.8% |
| ARHGEF16       | 27237  | 25.3% | 20.2% | 22.8% | 22.8% |
| PTOV1          | 53635  | 25.1% | 23.2% | 20.0% | 22.8% |
| FLJ20522       | 54965  | 21.5% | 17.2% | 29.6% | 22.8% |
| LILRA2         | 11027  | 11.9% | 33.2% | 23.2% | 22.8% |
| FLJ44290       | 375347 | 19.0% | 27.9% | 21.4% | 22.8% |
| PSMAL/GCP III  | 219595 | 22.0% | 22.2% | 24.1% | 22.8% |
| PAPPA          | 5069   | 28.0% | 19.3% | 21.0% | 22.8% |
| HADHA          | 3030   | 24.1% | 23.5% | 20.7% | 22.8% |
| GLA            | 2717   | 18.1% | 23.9% | 26.4% | 22.8% |
| PDZK10         | 9758   | 16.4% | 20.6% | 31.3% | 22.8% |
| LOC389874      | 389874 | 15.6% | 21.0% | 31.8% | 22.8% |
| LOC120379      | 120379 | 23.3% | 13.1% | 31.9% | 22.8% |
| ORS12          | 390064 | 34.2% | 22.0% | 12.1% | 22.8% |
| ALB            | 213    | 27.7% | 10.3% | 30.3% | 22.8% |
| LOC132671      | 132671 | 28.5% | 19.0% | 20.8% | 22.8% |
| APLP1          | 333    | 32.1% | 22.2% | 14.0% | 22.8% |
| ATP6V0A2       | 23545  | 19.7% | 21.1% | 27.6% | 22.8% |
| ZNFN1A1        | 10320  | 37.4% | 14.6% | 16.3% | 22.8% |
| PLCZ1          | 89869  | 18.5% | 25.8% | 24.0% | 22.8% |
| MASP2          | 10747  | 19.8% | 25.4% | 23.1% | 22.8% |
| C6ORF143       | 222584 | 14.4% | 16.9% | 37.1% | 22.8% |
| MGC26989       | 254268 | 17.2% | 27.0% | 24.2% | 22.8% |
| PITPN          | 5306   | 31.3% | 12.0% | 25.1% | 22.8% |
| INDO           | 3620   | 21.8% | 19.8% | 26.7% | 22.8% |
| SOC5           | 9655   | 20.0% | 21.5% | 26.9% | 22.8% |
| C14ORF154      | 84193  | 21.1% | 14.4% | 33.0% | 22.8% |
| PGRMC1         | 10857  | 24.1% | 17.4% | 26.9% | 22.8% |
| EEF1G          | 1937   | 28.3% | 16.9% | 23.1% | 22.8% |
| LOC283514      | 283514 | 32.9% | 14.3% | 21.2% | 22.8% |
| FLJ22318       | 64777  | 19.4% | 12.6% | 36.4% | 22.8% |
| MULK           | 55750  | 19.6% | 25.9% | 22.9% | 22.8% |
| C19ORF19       | 284451 | 31.4% | 13.7% | 23.3% | 22.8% |
| ETFDH          | 2110   | 21.8% | 20.4% | 26.1% | 22.8% |
| DERA           | 51071  | 27.8% | 22.4% | 18.2% | 22.8% |
| MRAS           | 22808  | 21.6% | 24.8% | 22.0% | 22.8% |
| DKFZP761017121 | 84247  | 21.7% | 21.7% | 25.0% | 22.8% |
| MPZ            | 4359   | 31.4% | 9.7%  | 27.3% | 22.8% |
| SDCBP2         | 27111  | 24.0% | 21.7% | 22.7% | 22.8% |
| SUPPT6H        | 6830   | 36.4% | 16.7% | 15.4% | 22.8% |
| SOX12          | 6666   | 23.0% | 20.6% | 24.8% | 22.8% |
| CD96           | 10225  | 25.4% | 19.1% | 23.9% | 22.8% |
| ZNF313         | 55905  | 23.4% | 19.6% | 25.4% | 22.8% |
| MGC24132       | 131965 | 34.3% | 12.5% | 21.6% | 22.8% |
| FXYD6          | 53826  | 33.2% | 14.1% | 21.1% | 22.8% |
| GOLGA7         | 51125  | 23.1% | 22.4% | 22.9% | 22.8% |
| ZNF262         | 9202   | 28.4% | 12.2% | 27.9% | 22.8% |
| EIF2AK4        | 440275 | 22.5% | 28.6% | 17.4% | 22.8% |
| C2ORF17        | 79137  | 15.4% | 18.4% | 34.6% | 22.8% |

|           |           |       |       |       |       |
|-----------|-----------|-------|-------|-------|-------|
| LOC284274 | 284274    | 21.3% | 18.7% | 28.5% | 22.8% |
| PTGER1    | 5731      | 18.8% | 23.8% | 25.9% | 22.8% |
| DSG2      | 1829      | 33.7% | 24.4% | 10.3% | 22.8% |
| DCI       | 1632      | 19.2% | 19.3% | 30.0% | 22.8% |
| GABRD     | 2563      | 28.9% | 18.5% | 21.1% | 22.8% |
| POU2F2    | 5452      | 16.5% | 22.7% | 29.3% | 22.8% |
| NCR2      | 9436      | 26.5% | 21.7% | 20.2% | 22.8% |
| LOC401190 | 401190    | 20.9% | 21.2% | 26.3% | 22.8% |
| LOC654346 | 654346    | 31.8% | 27.3% | 9.4%  | 22.8% |
| KLF8      | 11279     | 21.7% | 19.9% | 26.9% | 22.8% |
| LOC154907 | 154907    | 21.3% | 20.8% | 26.3% | 22.8% |
| FBXL8     | 55336     | 23.3% | 13.5% | 31.7% | 22.8% |
| PFKP      | 5214      | 23.2% | 24.7% | 20.6% | 22.8% |
| PGS1      | 9489      | 22.2% | 17.2% | 29.1% | 22.8% |
| OPA3      | 80207     | 25.8% | 18.6% | 24.1% | 22.8% |
| DNAJB5    | 25822     | 32.8% | 15.3% | 20.3% | 22.8% |
| RAB40C    | 57799     | 30.8% | 21.0% | 16.8% | 22.8% |
| KIAA0767  | 23151     | 16.1% | 29.4% | 23.0% | 22.8% |
| PRSSL1    | 400668    | 23.0% | 25.9% | 19.6% | 22.8% |
| GPR8      | 2832      | 25.1% | 25.7% | 17.7% | 22.8% |
| TLE1      | 7088      | 39.4% | 3.9%  | 25.2% | 22.8% |
| ZWINT     | 11130     | 21.4% | 24.7% | 22.3% | 22.8% |
| CHRN3     | 1142      | 33.3% | 13.5% | 21.7% | 22.8% |
| SERF2     | 10169     | 42.7% | 12.5% | 13.3% | 22.8% |
| NPY       | 4852      | 29.3% | 14.2% | 25.1% | 22.8% |
| PVALB     | 5816      | 29.1% | 22.6% | 16.7% | 22.8% |
| CLECSF8   | 338339    | 23.8% | 16.0% | 28.7% | 22.8% |
| PTEN      | 5728      | 24.0% | 20.5% | 24.0% | 22.8% |
| ZNF515    | 169792    | 20.9% | 13.8% | 33.9% | 22.8% |
| FLJ11506  | 79719     | 19.4% | 24.6% | 24.5% | 22.8% |
| TAS2R5    | 54429     | 21.2% | 31.8% | 15.5% | 22.8% |
| OR5H6     | 79295     | 27.1% | 21.7% | 19.7% | 22.8% |
| RBM9      | 23543     | 24.6% | 12.9% | 31.0% | 22.8% |
| PAI-RBP1  | 26135     | 23.3% | 22.4% | 22.8% | 22.8% |
| IFNA7     | 3444      | 26.6% | 17.5% | 24.4% | 22.8% |
| ADRA2A    | 150       | 24.3% | 23.4% | 20.8% | 22.8% |
| ACOX3     | 8310      | 31.9% | 20.7% | 15.9% | 22.8% |
| ARMET     | 7873      | 34.5% | 12.6% | 21.4% | 22.8% |
| PRKCL1    | 5585      | 26.8% | 20.6% | 21.2% | 22.8% |
| CLDN8     | 9073      | 32.7% | 22.8% | 13.1% | 22.8% |
| KIAA0931  | 23035     | 26.8% | 18.1% | 23.7% | 22.8% |
| AKAP7     | 9465      | 40.9% | 27.6% | 0.0%  | 22.8% |
| C22ORF9   | 23313     | 21.0% | 25.4% | 22.2% | 22.8% |
| TMC3      | 342125    | 19.3% | 27.9% | 21.4% | 22.8% |
| FUT3      | 2525      | 35.5% | 12.7% | 20.4% | 22.8% |
| EYA1      | 2138      | 27.2% | 19.9% | 21.4% | 22.8% |
| ITPR2     | 3709      | 26.9% | 17.7% | 23.9% | 22.9% |
| ZDHHC5    | 25921     | 18.2% | 16.3% | 34.1% | 22.9% |
| FLJ36779  | 158055    | 23.8% | 11.0% | 33.8% | 22.9% |
| SLC25A13  | 10165     | 21.9% | 19.6% | 27.1% | 22.9% |
| RGPD2     | 729857    | 30.0% | 12.2% | 26.3% | 22.9% |
| LOC338692 | 338692    | 16.7% | 22.8% | 29.1% | 22.9% |
| TCF20     | 6942      | 25.3% | 23.4% | 19.9% | 22.9% |
| PRSS12    | 8492      | 27.2% | 25.1% | 16.2% | 22.9% |
| FLJ14281  | 79982     | 18.6% | 22.8% | 27.2% | 22.9% |
| HSPA1L    | 3305      | 28.9% | 13.8% | 25.9% | 22.9% |
| NPY1R     | 4886      | 19.1% | 28.3% | 21.2% | 22.9% |
| OR6N2     | 81442     | 30.5% | 23.8% | 14.3% | 22.9% |
| BSPH1     | 100131137 | 41.5% | 9.1%  | 18.0% | 22.9% |
| PTPRZ1    | 5803      | 18.0% | 26.1% | 24.5% | 22.9% |
| POLR3C    | 10623     | 23.1% | 25.2% | 20.3% | 22.9% |
| SCN2B     | 6327      | 23.2% | 17.6% | 27.8% | 22.9% |
| HNT       | 50863     | 28.3% | 15.4% | 24.9% | 22.9% |
| COQ6      | 51004     | 21.3% | 15.1% | 32.1% | 22.9% |
| COL10A1   | 1300      | 30.2% | 9.5%  | 28.9% | 22.9% |
| JMJD3     | 23135     | 30.1% | 20.2% | 18.3% | 22.9% |
| MGC10765  | 79269     | 20.4% | 16.6% | 31.6% | 22.9% |
| TPD52L2   | 7165      | 19.4% | 24.0% | 25.2% | 22.9% |
| UNQ5782   | 387837    | 16.3% | 23.8% | 28.4% | 22.9% |
| LOC390927 | 390927    | 28.7% | 8.4%  | 31.5% | 22.9% |
| FLJ34960  | 257240    | 18.0% | 26.5% | 24.1% | 22.9% |
| LHFPL1    | 340596    | 19.0% | 18.6% | 31.0% | 22.9% |
| SLC17A8   | 246213    | 40.4% | 12.2% | 16.0% | 22.9% |
| WNT2B     | 7482      | 29.0% | 13.0% | 26.6% | 22.9% |
| ANXA13    | 312       | 21.1% | 23.0% | 24.5% | 22.9% |
| ECM1      | 1893      | 13.0% | 17.6% | 37.9% | 22.9% |
| C12ORF2   | 11228     | 26.1% | 13.1% | 29.4% | 22.9% |
| OAS1      | 4938      | 27.9% | 17.2% | 23.5% | 22.9% |
| FLJ35530  | 400798    | 23.2% | 17.0% | 28.4% | 22.9% |
| C2ORF28   | 51374     | 21.1% | 22.9% | 24.6% | 22.9% |
| NP25      | 29114     | 26.7% | 5.0%  | 36.9% | 22.9% |
| GYG2      | 8908      | 21.6% | 23.4% | 23.6% | 22.9% |
| GRK5      | 2869      | 24.8% | 16.2% | 27.6% | 22.9% |
| OR10R2    | 343406    | 30.2% | 23.4% | 15.1% | 22.9% |
| LEFTB     | 10637     | 19.3% | 11.1% | 38.3% | 22.9% |
| S100A16   | 140576    | 32.0% | 15.3% | 21.4% | 22.9% |
| PPM2C     | 54704     | 30.7% | 26.5% | 11.5% | 22.9% |
| FLJ10292  | 55110     | 35.7% | 11.2% | 21.7% | 22.9% |
| LOC147965 | 147965    | 19.6% | 22.5% | 26.6% | 22.9% |
| FLJ32752  | 144132    | 20.3% | 14.5% | 33.9% | 22.9% |
| CST7      | 8530      | 29.0% | 25.2% | 14.4% | 22.9% |
| CYP4A22   | 284541    | 28.8% | 19.1% | 20.8% | 22.9% |
| C1ORF42   | 54544     | 27.9% | 26.9% | 13.9% | 22.9% |
| STK10     | 6793      | 25.3% | 22.6% | 20.7% | 22.9% |
| CASP10    | 843       | 30.7% | 21.8% | 16.2% | 22.9% |
| SLC35B4   | 84912     | 24.3% | 22.2% | 22.2% | 22.9% |
| DELGEF    | 26297     | 11.8% | 21.6% | 35.2% | 22.9% |
| CXorf39   | 139231    | 17.7% | 25.1% | 25.9% | 22.9% |

|               |        |       |       |       |       |
|---------------|--------|-------|-------|-------|-------|
| RNF169        | 254225 | 28.6% | 18.6% | 21.5% | 22.9% |
| OLIG3         | 167826 | 22.4% | 21.2% | 25.1% | 22.9% |
| NR3C1         | 2908   | 25.9% | 17.2% | 25.6% | 22.9% |
| RABGGTA       | 5875   | 37.7% | 17.1% | 13.9% | 22.9% |
| APBPB1        | 8883   | 29.8% | 13.5% | 25.4% | 22.9% |
| CYP20A1       | 57404  | 21.0% | 19.3% | 28.4% | 22.9% |
| ZNF275        | 10838  | 23.9% | 21.9% | 23.0% | 22.9% |
| LOC129607     | 129607 | 18.6% | 27.4% | 22.7% | 22.9% |
| LAMB1         | 3912   | 27.5% | 20.9% | 20.3% | 22.9% |
| C12ORF22      | 81566  | 20.1% | 16.6% | 32.0% | 22.9% |
| ZIC1          | 7545   | 27.9% | 19.7% | 21.1% | 22.9% |
| ANXA2         | 302    | 24.3% | 23.3% | 21.1% | 22.9% |
| UNC50         | 25972  | 21.8% | 18.0% | 28.8% | 22.9% |
| C8B           | 732    | 24.2% | 20.7% | 23.8% | 22.9% |
| LOC161823     | 161823 | 23.7% | 21.6% | 23.4% | 22.9% |
| LOC401565     | 401565 | 30.8% | 19.4% | 18.4% | 22.9% |
| LOC137886     | 137886 | 24.1% | 24.9% | 19.8% | 22.9% |
| COLEC10       | 10584  | 27.7% | 23.7% | 17.3% | 22.9% |
| ARHGAP18      | 93663  | 29.3% | 20.5% | 18.8% | 22.9% |
| TACR3         | 6870   | 24.9% | 24.5% | 19.4% | 22.9% |
| CUL4B         | 8450   | 27.5% | 19.7% | 21.6% | 22.9% |
| NUP210        | 23225  | 35.0% | 20.4% | 13.3% | 22.9% |
| NR3C2         | 4306   | 36.5% | 11.0% | 21.2% | 22.9% |
| HCRTR1        | 3061   | 26.5% | 23.1% | 19.1% | 22.9% |
| GRINA         | 2907   | 32.4% | 15.4% | 20.9% | 22.9% |
| RNF41         | 10193  | 29.2% | 22.5% | 17.1% | 22.9% |
| ALKBH2        | 121642 | 26.1% | 14.5% | 28.2% | 22.9% |
| C7ORF36       | 57002  | 29.3% | 22.2% | 17.3% | 22.9% |
| FASN          | 2194   | 21.1% | 12.0% | 35.7% | 22.9% |
| FLJ21308      | 79668  | 24.6% | 16.8% | 27.4% | 22.9% |
| ECE1          | 1889   | 24.9% | 17.9% | 26.0% | 22.9% |
| MGC33214      | 153396 | 17.6% | 27.2% | 24.0% | 22.9% |
| CORO1C        | 23603  | 22.6% | 20.3% | 25.9% | 22.9% |
| NTRK2         | 4915   | 22.4% | 24.4% | 22.0% | 22.9% |
| CGI-62        | 51101  | 23.8% | 13.8% | 31.3% | 22.9% |
| ADAM17        | 6868   | 21.7% | 31.5% | 15.6% | 22.9% |
| FAM16AX       | 8226   | 30.9% | 18.5% | 19.3% | 22.9% |
| WDFY4         | 57705  | 29.1% | 24.4% | 15.2% | 22.9% |
| DC-UBP        | 92181  | 21.4% | 17.8% | 29.6% | 22.9% |
| PLEC1         | 5339   | 26.4% | 22.1% | 20.3% | 22.9% |
| KIAA0863      | 22850  | 26.4% | 17.1% | 25.3% | 22.9% |
| RFP           | 5987   | 20.8% | 24.7% | 23.4% | 22.9% |
| SEMA4G        | 57715  | 38.0% | 15.7% | 15.1% | 22.9% |
| SGCD          | 6444   | 23.4% | 24.1% | 21.3% | 22.9% |
| FLJ42957      | 400077 | 26.3% | 17.1% | 25.5% | 22.9% |
| RHD           | 6007   | 20.5% | 17.6% | 30.8% | 22.9% |
| KIAA1598      | 57698  | 25.5% | 20.8% | 22.5% | 22.9% |
| C20ORF42      | 55612  | 25.7% | 19.8% | 23.3% | 22.9% |
| CRIP1         | 1396   | 23.5% | 25.6% | 19.7% | 22.9% |
| MGC22679      | 151230 | 22.4% | 18.7% | 27.7% | 22.9% |
| MIB2          | 142678 | 26.2% | 17.2% | 25.4% | 22.9% |
| C22ORF3       | 25807  | 11.7% | 18.8% | 38.4% | 22.9% |
| LOC347527     | 347527 | 34.9% | 12.2% | 21.7% | 23.0% |
| ABCA4         | 24     | 35.0% | 11.3% | 22.6% | 23.0% |
| C20ORF144     | 128864 | 24.0% | 26.5% | 18.3% | 23.0% |
| HSPA12A       | 259217 | 26.9% | 19.1% | 22.9% | 23.0% |
| PAPD5         | 64282  | 30.5% | 14.2% | 24.1% | 23.0% |
| FLJ20421      | 54928  | 19.8% | 23.1% | 26.0% | 23.0% |
| IGFALS        | 3483   | 21.3% | 28.7% | 18.8% | 23.0% |
| DKFZP667B0210 | 253738 | 25.0% | 21.4% | 22.4% | 23.0% |
| THNSL1        | 79896  | 24.2% | 24.9% | 19.8% | 23.0% |
| PRIC285       | 85441  | 25.4% | 15.3% | 28.2% | 23.0% |
| FRAT1         | 10023  | 32.9% | 16.1% | 19.9% | 23.0% |
| BAI2          | 576    | 31.1% | 15.5% | 22.2% | 23.0% |
| FLJ20323      | 54468  | 16.7% | 21.0% | 31.2% | 23.0% |
| FLJ25976      | 283579 | 18.4% | 20.8% | 29.7% | 23.0% |
| FBXO10        | 26267  | 20.3% | 16.4% | 32.2% | 23.0% |
| YIPF1         | 54432  | 30.2% | 18.9% | 19.8% | 23.0% |
| WDR4          | 10785  | 15.2% | 25.0% | 28.7% | 23.0% |
| CEND3         | 896    | 21.0% | 7.5%  | 40.4% | 23.0% |
| GUCY1B3       | 2983   | 26.6% | 21.1% | 21.2% | 23.0% |
| MLCK          | 91807  | 24.7% | 18.8% | 25.4% | 23.0% |
| ARS           | 57152  | 23.8% | 16.1% | 28.9% | 23.0% |
| HSPC132       | 51499  | 12.4% | 21.2% | 35.3% | 23.0% |
| IL4I1         | 259307 | 37.3% | 11.8% | 19.7% | 23.0% |
| CENPF         | 1063   | 27.5% | 19.0% | 22.4% | 23.0% |
| FLJ90652      | 283899 | 22.3% | 16.9% | 29.7% | 23.0% |
| STX3A         | 6809   | 29.2% | 18.2% | 21.4% | 23.0% |
| PP591         | 80308  | 33.3% | 12.3% | 23.3% | 23.0% |
| LOC388585     | 388585 | 22.4% | 17.6% | 28.9% | 23.0% |
| ZFP28         | 140612 | 33.7% | 19.3% | 15.9% | 23.0% |
| LOC90529      | 90529  | 27.4% | 20.7% | 20.8% | 23.0% |
| MRC1L1        | 414308 | 25.2% | 26.8% | 16.9% | 23.0% |
| LOC390667     | 390667 | 21.2% | 27.2% | 20.5% | 23.0% |
| LOC56964      | 56964  | 32.6% | 18.2% | 18.2% | 23.0% |
| PIGB          | 9488   | 28.0% | 24.7% | 16.2% | 23.0% |
| CARD11        | 84433  | 28.1% | 18.7% | 22.1% | 23.0% |
| KIAA0372      | 9652   | 25.5% | 22.7% | 20.7% | 23.0% |
| CHD8          | 57680  | 20.0% | 16.9% | 32.0% | 23.0% |
| FLJ10116      | 55686  | 25.7% | 4.2%  | 39.0% | 23.0% |
| SLC22A17      | 51310  | 29.0% | 16.5% | 23.4% | 23.0% |
| MRPL9         | 65005  | 34.9% | 17.8% | 16.3% | 23.0% |
| RNF144        | 9781   | 28.9% | 20.4% | 19.7% | 23.0% |
| NPR3          | 4883   | 25.3% | 19.8% | 23.9% | 23.0% |
| GALNT4        | 8693   | 29.2% | 17.0% | 22.7% | 23.0% |
| TMPRSS5       | 80975  | 21.7% | 19.3% | 28.0% | 23.0% |
| MED25         | 55090  | 36.4% | 5.0%  | 27.6% | 23.0% |
| CNGA2         | 1260   | 27.4% | 9.6%  | 32.0% | 23.0% |

|           |        |       |       |       |       |
|-----------|--------|-------|-------|-------|-------|
| AGTR2     | 186    | 24.8% | 17.4% | 26.7% | 23.0% |
| GPRC5C    | 55890  | 28.0% | 22.8% | 18.2% | 23.0% |
| ENTPD2    | 954    | 28.3% | 22.3% | 18.4% | 23.0% |
| PCDHGA9   | 56107  | 18.2% | 23.2% | 27.6% | 23.0% |
| E2F3      | 1871   | 32.8% | 11.6% | 24.6% | 23.0% |
| ARHGEF6   | 9459   | 25.2% | 22.3% | 21.5% | 23.0% |
| TAS2R16   | 50833  | 26.1% | 19.0% | 23.8% | 23.0% |
| CCM1      | 889    | 13.2% | 31.5% | 24.2% | 23.0% |
| IL4R      | 3566   | 22.0% | 23.8% | 23.2% | 23.0% |
| EDG1      | 1901   | 14.9% | 26.9% | 27.2% | 23.0% |
| SCML1     | 6322   | 26.6% | 21.1% | 21.3% | 23.0% |
| PNRC1     | 10957  | 19.3% | 27.9% | 21.8% | 23.0% |
| OR5BU1    | 401994 | 25.9% | 19.8% | 23.3% | 23.0% |
| MGC33302  | 256471 | 22.5% | 15.9% | 30.6% | 23.0% |
| POU4F1    | 5457   | 47.8% | 6.3%  | 14.9% | 23.0% |
| ING1L     | 3622   | 30.0% | 18.2% | 20.8% | 23.0% |
| MGC45731  | 90874  | 21.2% | 15.0% | 32.8% | 23.0% |
| UBE2S     | 27338  | 28.9% | 21.7% | 18.4% | 23.0% |
| CCL27     | 10850  | 39.5% | 11.5% | 18.0% | 23.0% |
| ENO3      | 2027   | 26.9% | 23.1% | 19.0% | 23.0% |
| DNAJB9    | 4189   | 21.4% | 18.3% | 29.3% | 23.0% |
| PHF20     | 51230  | 30.0% | 15.0% | 24.0% | 23.0% |
| CXCL10    | 3627   | 31.9% | 17.3% | 19.8% | 23.0% |
| GRIA4     | 2893   | 26.1% | 20.8% | 22.2% | 23.0% |
| CFH       | 3075   | 17.3% | 24.8% | 27.0% | 23.0% |
| GRIN2B    | 2904   | 28.2% | 15.5% | 25.3% | 23.0% |
| SMCR8     | 140775 | 25.4% | 13.5% | 30.2% | 23.0% |
| LOC401720 | 401720 | 26.1% | 16.5% | 26.4% | 23.0% |
| KRTCAP2   | 200185 | 33.7% | 14.5% | 20.9% | 23.0% |
| DO        | 420    | 36.9% | 13.3% | 18.8% | 23.0% |
| KRTAP3-2  | 83897  | 35.4% | 14.7% | 18.9% | 23.0% |
| MLLT3     | 4300   | 21.2% | 28.6% | 19.3% | 23.0% |
| LOC57019  | 57019  | 22.6% | 16.1% | 30.3% | 23.0% |
| HNF4A     | 3172   | 29.7% | 17.4% | 21.9% | 23.0% |
| TRAF2     | 7186   | 21.4% | 14.3% | 33.3% | 23.0% |
| RIN1      | 9610   | 35.7% | 0.0%  | 33.3% | 23.0% |
| ARGBP2    | 8470   | 18.0% | 19.3% | 31.7% | 23.0% |
| PLCB2     | 5330   | 36.7% | 9.0%  | 23.4% | 23.0% |
| MPST      | 4357   | 18.0% | 29.8% | 21.3% | 23.0% |
| LOC340156 | 340156 | 24.1% | 26.7% | 18.2% | 23.0% |
| USHBP1    | 83878  | 21.2% | 25.4% | 22.4% | 23.0% |
| PCDHGB1   | 56104  | 32.8% | 13.6% | 22.6% | 23.0% |
| JM11      | 90060  | 26.2% | 12.1% | 30.8% | 23.0% |
| LOC90525  | 90525  | 24.4% | 11.3% | 33.3% | 23.0% |
| LOC147111 | 147111 | 18.0% | 23.9% | 27.2% | 23.0% |
| BCAT1     | 586    | 23.8% | 20.2% | 25.1% | 23.0% |
| SLC35C2   | 51006  | 25.0% | 13.5% | 30.6% | 23.0% |
| HNRPL     | 3191   | 19.0% | 18.1% | 32.0% | 23.0% |
| FLJ11767  | 79645  | 32.8% | 15.2% | 21.0% | 23.0% |
| CD7       | 924    | 20.0% | 25.6% | 23.4% | 23.0% |
| C6ORF78   | 221301 | 23.1% | 20.9% | 25.1% | 23.0% |
| ATXN2L    | 11273  | 26.2% | 20.5% | 22.4% | 23.0% |
| KCNJ5     | 3762   | 35.0% | 17.8% | 16.3% | 23.0% |
| TNFRSF1B  | 7133   | 21.1% | 17.5% | 30.4% | 23.0% |
| LOC159091 | 159091 | 20.7% | 26.2% | 22.2% | 23.0% |
| SBLF      | 11037  | 14.6% | 26.6% | 27.9% | 23.0% |
| C9ORF20   | 158135 | 18.8% | 22.3% | 28.0% | 23.0% |
| LMTK2     | 22853  | 22.6% | 26.9% | 19.5% | 23.0% |
| ARHGEF4   | 50649  | 19.4% | 26.1% | 23.5% | 23.0% |
| RHPN1     | 114822 | 27.2% | 24.3% | 17.6% | 23.0% |
| UGT1A5    | 54579  | 21.7% | 21.4% | 26.0% | 23.0% |
| SLC39A4   | 55630  | 18.9% | 24.5% | 25.8% | 23.0% |
| OTOP2     | 92736  | 37.0% | 12.3% | 19.8% | 23.0% |
| C5ORF14   | 79770  | 37.2% | 10.2% | 21.8% | 23.0% |
| PKP4      | 8502   | 22.9% | 21.9% | 24.3% | 23.0% |
| FLJ33069  | 137835 | 17.5% | 9.1%  | 42.5% | 23.0% |
| MGC29671  | 201305 | 27.2% | 21.9% | 20.0% | 23.0% |
| ZDHHC18   | 84243  | 23.3% | 20.5% | 25.3% | 23.0% |
| LOC144404 | 144404 | 18.1% | 23.0% | 28.0% | 23.0% |
| ALOX15    | 246    | 27.5% | 20.7% | 20.9% | 23.0% |
| PTDSS2    | 81490  | 28.0% | 18.6% | 22.5% | 23.0% |
| KIAA1881  | 729359 | 21.8% | 20.8% | 26.5% | 23.0% |
| C20ORF155 | 54675  | 27.2% | 18.0% | 23.9% | 23.0% |
| FLJ90013  | 202018 | 15.8% | 25.0% | 28.3% | 23.0% |
| CNTN1     | 1272   | 25.2% | 25.2% | 18.8% | 23.0% |
| ADAM9     | 8754   | 26.5% | 26.5% | 16.2% | 23.0% |
| OAZ1      | 4946   | 21.4% | 18.5% | 29.2% | 23.0% |
| ZFPM1     | 161882 | 30.2% | 14.7% | 24.2% | 23.0% |
| FLJ32658  | 147872 | 24.5% | 19.0% | 25.7% | 23.0% |
| ZNF598    | 90850  | 25.0% | 16.7% | 27.5% | 23.0% |
| SCOC      | 60592  | 26.4% | 21.1% | 21.6% | 23.0% |
| MRPS36    | 92259  | 25.0% | 25.3% | 18.8% | 23.0% |
| RNF113B   | 140432 | 31.2% | 16.0% | 22.0% | 23.0% |
| SSX1      | 6756   | 22.7% | 19.3% | 27.2% | 23.0% |
| URP2      | 83706  | 20.4% | 27.0% | 21.7% | 23.0% |
| PLEKHG3   | 26030  | 22.0% | 16.1% | 31.1% | 23.0% |
| STYX      | 6815   | 21.6% | 28.0% | 19.5% | 23.0% |
| STARD8    | 9754   | 14.7% | 34.3% | 20.1% | 23.0% |
| EAT2      | 117157 | 18.7% | 27.9% | 22.6% | 23.0% |
| KIAA0376  | 23384  | 20.2% | 15.7% | 33.2% | 23.0% |
| CPNE3     | 8895   | 25.5% | 22.0% | 21.6% | 23.1% |
| LOC375323 | 375323 | 16.6% | 15.6% | 37.0% | 23.1% |
| SLC34A1   | 6569   | 20.8% | 25.4% | 23.0% | 23.1% |
| UBE2D2    | 7322   | 26.3% | 12.5% | 30.3% | 23.1% |
| LOC150356 | 150356 | 22.5% | 23.5% | 23.1% | 23.1% |
| TMEM4     | 10330  | 23.6% | 24.7% | 20.9% | 23.1% |
| FLJ39576  | 285525 | 18.0% | 15.0% | 36.1% | 23.1% |
| CSF2RA    | 1438   | 26.7% | 18.4% | 24.1% | 23.1% |

|              |        |       |       |       |       |
|--------------|--------|-------|-------|-------|-------|
| PHOSPHO2     | 493911 | 24.6% | 23.0% | 21.6% | 23.1% |
| COPS6        | 10980  | 19.0% | 22.4% | 27.7% | 23.1% |
| LOC133619    | 133619 | 33.3% | 15.1% | 20.8% | 23.1% |
| PEX19        | 5824   | 27.4% | 18.3% | 23.5% | 23.1% |
| ACATE2       | 23597  | 26.7% | 20.0% | 22.4% | 23.1% |
| ARFGAP1      | 55738  | 30.4% | 17.8% | 21.0% | 23.1% |
| ASCL2        | 430    | 25.9% | 18.6% | 24.8% | 23.1% |
| P15RS        | 55197  | 29.5% | 19.2% | 20.5% | 23.1% |
| PLAUR        | 5329   | 27.6% | 19.7% | 21.9% | 23.1% |
| SH3BP4       | 23677  | 14.4% | 28.7% | 26.1% | 23.1% |
| KIF23        | 9493   | 37.0% | 16.2% | 16.0% | 23.1% |
| DDC          | 1644   | 28.1% | 13.9% | 27.2% | 23.1% |
| PCDH21       | 92211  | 38.6% | 18.3% | 12.4% | 23.1% |
| FLJ11200     | 55325  | 27.8% | 19.6% | 21.8% | 23.1% |
| SLC36A2      | 153201 | 33.0% | 21.6% | 14.6% | 23.1% |
| VBP1         | 7411   | 21.8% | 20.3% | 27.1% | 23.1% |
| LOC340578    | 340578 | 11.9% | 13.7% | 43.5% | 23.1% |
| OLFM12A      | 169611 | 27.6% | 21.2% | 20.4% | 23.1% |
| PFKM         | 5213   | 24.4% | 23.1% | 21.7% | 23.1% |
| ZNHIT4       | 83444  | 27.3% | 20.5% | 21.5% | 23.1% |
| SMPX         | 23676  | 22.8% | 19.0% | 27.5% | 23.1% |
| CTSO         | 1519   | 23.3% | 23.2% | 22.7% | 23.1% |
| LOC221091    | 221091 | 27.9% | 16.2% | 25.1% | 23.1% |
| FLJ00012     | 89849  | 15.0% | 13.0% | 41.3% | 23.1% |
| COLQ         | 8292   | 35.7% | 21.2% | 12.4% | 23.1% |
| SPEC2        | 56990  | 34.3% | 14.4% | 20.5% | 23.1% |
| ABCG2        | 9429   | 29.4% | 16.9% | 23.0% | 23.1% |
| SF4          | 57794  | 32.7% | 18.5% | 18.1% | 23.1% |
| FLJ37464     | 283848 | 23.0% | 17.4% | 28.9% | 23.1% |
| HIST1H1E     | 3008   | 23.5% | 22.0% | 23.8% | 23.1% |
| TRPM6        | 140803 | 25.8% | 16.5% | 27.0% | 23.1% |
| EVL          | 51466  | 26.0% | 24.6% | 18.7% | 23.1% |
| SFTPA1       | 6435   | 21.1% | 20.0% | 28.2% | 23.1% |
| D8S2298E     | 7993   | 24.0% | 13.5% | 31.7% | 23.1% |
| SOX18        | 54345  | 26.4% | 20.0% | 22.9% | 23.1% |
| PEPP-2       | 84528  | 37.1% | 10.3% | 21.9% | 23.1% |
| OR6C76       | 390326 | 19.7% | 18.1% | 31.4% | 23.1% |
| XKRX         | 402415 | 14.9% | 18.6% | 35.7% | 23.1% |
| DKFZP56K0524 | 26095  | 15.3% | 29.1% | 24.8% | 23.1% |
| SPAST        | 6683   | 33.8% | 18.2% | 17.3% | 23.1% |
| MAP4K2       | 5871   | 13.4% | 29.6% | 26.3% | 23.1% |
| SLC7A9       | 11136  | 25.7% | 18.3% | 25.3% | 23.1% |
| ANKRD3       | 54101  | 25.4% | 21.0% | 22.9% | 23.1% |
| NOL1         | 4839   | 29.4% | 19.6% | 20.3% | 23.1% |
| DKK4         | 27121  | 20.2% | 21.1% | 28.0% | 23.1% |
| CD24         | 934    | 21.0% | 24.8% | 23.5% | 23.1% |
| NRG4         | 145957 | 27.1% | 17.1% | 25.1% | 23.1% |
| TACSTD1      | 4072   | 19.0% | 25.8% | 24.5% | 23.1% |
| FLJ44112     | 374467 | 10.5% | 24.5% | 34.2% | 23.1% |
| ZNF495       | 79149  | 21.7% | 20.1% | 27.6% | 23.1% |
| ST6GALNAC1   | 55808  | 17.2% | 23.0% | 29.1% | 23.1% |
| UNQ1940      | 389558 | 23.0% | 18.6% | 27.7% | 23.1% |
| FHL5         | 9457   | 31.9% | 14.4% | 23.0% | 23.1% |
| NOL3         | 8996   | 25.9% | 25.3% | 18.1% | 23.1% |
| FLJ38716     | 126868 | 19.8% | 16.4% | 33.2% | 23.1% |
| C15ORF20     | 80119  | 23.7% | 21.6% | 24.0% | 23.1% |
| MGC3265      | 78991  | 21.3% | 21.9% | 26.1% | 23.1% |
| PLG          | 5340   | 32.0% | 13.0% | 24.3% | 23.1% |
| PPP1R14A     | 94274  | 30.4% | 21.5% | 17.5% | 23.1% |
| LOC343505    | 343505 | 20.6% | 26.2% | 22.6% | 23.1% |
| CEP192       | 55125  | 23.3% | 16.7% | 29.4% | 23.1% |
| IRX3         | 79191  | 30.4% | 17.7% | 21.2% | 23.1% |
| CTRL         | 1506   | 18.1% | 21.6% | 29.7% | 23.1% |
| DRAP1        | 10589  | 24.7% | 24.0% | 20.6% | 23.1% |
| GRIK3        | 2899   | 30.6% | 17.1% | 21.6% | 23.1% |
| BARHL2       | 343472 | 28.0% | 25.9% | 15.4% | 23.1% |
| NRAP         | 4892   | 33.3% | 23.3% | 12.7% | 23.1% |
| OR8U1        | 219417 | 21.8% | 20.7% | 26.9% | 23.1% |
| MAD1L1       | 8379   | 12.1% | 29.5% | 27.7% | 23.1% |
| SLC38A3      | 10991  | 33.8% | 12.0% | 23.5% | 23.1% |
| MAGEB4       | 4115   | 22.8% | 27.9% | 18.6% | 23.1% |
| HAO1         | 54363  | 39.1% | 13.8% | 16.4% | 23.1% |
| FLJ12847     | 79648  | 21.5% | 24.7% | 23.1% | 23.1% |
| DPYSL5       | 56896  | 31.7% | 12.7% | 25.0% | 23.1% |
| CTNS         | 1497   | 31.3% | 19.1% | 18.9% | 23.1% |
| SIX2         | 10736  | 35.6% | 20.7% | 13.0% | 23.1% |
| OR13C5       | 138799 | 19.3% | 20.6% | 29.4% | 23.1% |
| KCTD9        | 54793  | 25.3% | 24.2% | 19.9% | 23.1% |
| MGC52057     | 130574 | 29.2% | 20.9% | 19.3% | 23.1% |
| PACRG        | 135138 | 43.2% | 13.1% | 13.0% | 23.1% |
| HAP1         | 9001   | 20.0% | 23.8% | 25.5% | 23.1% |
| LRPAP1       | 4043   | 20.7% | 15.2% | 33.4% | 23.1% |
| CMKLR1       | 1240   | 26.6% | 21.4% | 21.3% | 23.1% |
| RPIA         | 22934  | 25.0% | 21.4% | 23.0% | 23.1% |
| ALPHA4GNT    | 51146  | 29.1% | 18.0% | 22.3% | 23.1% |
| PTHR1        | 5745   | 25.5% | 19.7% | 24.2% | 23.1% |
| PGPL         | 8225   | 27.7% | 12.1% | 29.7% | 23.1% |
| HBB          | 3043   | 28.2% | 13.5% | 27.7% | 23.1% |
| ANP32E       | 81611  | 30.3% | 15.2% | 23.8% | 23.1% |
| CBLL1        | 79872  | 33.6% | 14.4% | 21.3% | 23.1% |
| HIRA         | 7290   | 32.3% | 20.3% | 16.9% | 23.1% |
| ZNF557       | 79230  | 32.3% | 17.1% | 20.0% | 23.1% |
| OR1K1        | 392392 | 22.7% | 18.5% | 28.2% | 23.1% |
| SLC11A1      | 6556   | 17.7% | 24.2% | 27.5% | 23.1% |
| UNQ3112      | 399967 | 21.2% | 12.5% | 35.8% | 23.1% |
| P2RY4        | 5030   | 34.7% | 20.5% | 14.3% | 23.1% |
| G6ORF149     | 57128  | 21.7% | 18.7% | 29.0% | 23.1% |
| ABAT         | 18     | 32.8% | 21.3% | 15.3% | 23.1% |

|               |        |       |       |       |       |
|---------------|--------|-------|-------|-------|-------|
| CNTNAP2       | 26047  | 33.7% | 18.0% | 17.7% | 23.1% |
| NFASC         | 23114  | 24.5% | 22.3% | 22.7% | 23.1% |
| YBX1          | 4904   | 34.2% | 12.3% | 22.9% | 23.1% |
| LOC653319     | 653319 | 23.0% | 21.6% | 24.8% | 23.1% |
| DERP6         | 23587  | 19.9% | 13.6% | 35.9% | 23.1% |
| TJP1          | 7082   | 24.2% | 26.3% | 18.9% | 23.1% |
| GALNT5        | 11227  | 23.2% | 23.5% | 22.8% | 23.1% |
| DKFZP564F0522 | 25940  | 22.1% | 7.1%  | 40.2% | 23.1% |
| PLA2G2E       | 30814  | 22.8% | 18.9% | 27.7% | 23.1% |
| RBBP8         | 5932   | 16.1% | 29.6% | 23.8% | 23.2% |
| TIMP4         | 7079   | 24.8% | 18.4% | 26.3% | 23.2% |
| ST6GALNAC5    | 81849  | 30.0% | 18.1% | 21.3% | 23.2% |
| ZNF291        | 49855  | 29.5% | 17.9% | 22.0% | 23.2% |
| SLC25A3       | 5250   | 26.0% | 26.1% | 17.4% | 23.2% |
| WIG1          | 64393  | 23.0% | 11.3% | 35.1% | 23.2% |
| FLJ39370      | 132720 | 27.5% | 17.8% | 24.2% | 23.2% |
| RRM1          | 6240   | 29.7% | 16.7% | 23.0% | 23.2% |
| GPT2          | 84706  | 24.5% | 25.5% | 19.5% | 23.2% |
| GGH           | 8836   | 29.4% | 19.3% | 20.8% | 23.2% |
| SLCO1B3       | 28234  | 31.4% | 14.6% | 23.5% | 23.2% |
| GJA10         | 81025  | 21.9% | 15.3% | 32.3% | 23.2% |
| PEX11G        | 92960  | 26.8% | 22.4% | 20.2% | 23.2% |
| C15ORF21      | 283651 | 24.3% | 19.0% | 26.2% | 23.2% |
| KIAA0683      | 9894   | 23.8% | 26.2% | 19.5% | 23.2% |
| NDRG1         | 10397  | 22.4% | 21.2% | 25.9% | 23.2% |
| LOC134492     | 134492 | 22.1% | 17.2% | 30.3% | 23.2% |
| AMBN          | 258    | 31.0% | 20.0% | 18.5% | 23.2% |
| DPEP1         | 1800   | 30.1% | 25.5% | 13.8% | 23.2% |
| ZFAND6        | 54469  | 32.3% | 15.1% | 22.1% | 23.2% |
| PLD2          | 5338   | 25.1% | 11.7% | 32.7% | 23.2% |
| PRF1          | 5551   | 20.7% | 27.1% | 21.6% | 23.2% |
| FLJ12953      | 84058  | 14.5% | 35.2% | 19.7% | 23.2% |
| SPRR3         | 6707   | 31.1% | 20.8% | 17.6% | 23.2% |
| GDF6          | 392255 | 24.5% | 18.3% | 26.7% | 23.2% |
| CTAG1A        | 246100 | 18.2% | 24.9% | 26.4% | 23.2% |
| TCF19         | 6941   | 26.6% | 20.2% | 22.6% | 23.2% |
| RAB36         | 9609   | 34.9% | 20.0% | 14.6% | 23.2% |
| RFX5          | 5993   | 28.8% | 23.0% | 17.8% | 23.2% |
| RFX4          | 5992   | 23.9% | 19.2% | 26.3% | 23.2% |
| HIRIP3        | 8479   | 7.6%  | 42.0% | 19.9% | 23.2% |
| GPR107        | 57720  | 28.0% | 21.6% | 19.9% | 23.2% |
| MYO9A         | 4649   | 26.5% | 21.5% | 21.6% | 23.2% |
| PIGK          | 10026  | 29.1% | 19.1% | 21.3% | 23.2% |
| SAST          | 22983  | 19.9% | 25.6% | 24.0% | 23.2% |
| NALP1         | 22861  | 15.7% | 12.5% | 41.3% | 23.2% |
| KIAA0232      | 9778   | 18.8% | 23.8% | 26.9% | 23.2% |
| DPT           | 1805   | 32.3% | 20.0% | 17.3% | 23.2% |
| INVS          | 27130  | 31.0% | 23.5% | 15.1% | 23.2% |
| HERC1         | 8925   | 30.3% | 13.9% | 25.3% | 23.2% |
| LMX1A         | 4009   | 27.1% | 21.8% | 20.6% | 23.2% |
| CCL3          | 6348   | 25.8% | 16.7% | 27.0% | 23.2% |
| PRDM16        | 63976  | 16.4% | 21.8% | 31.3% | 23.2% |
| ABCA3         | 21     | 23.5% | 17.9% | 28.2% | 23.2% |
| ARTN          | 9048   | 10.5% | 26.7% | 32.4% | 23.2% |
| IFI35         | 3430   | 26.8% | 23.9% | 18.9% | 23.2% |
| MGST2         | 4258   | 25.6% | 17.6% | 26.3% | 23.2% |
| C9ORF156      | 51531  | 28.8% | 19.7% | 21.0% | 23.2% |
| ZP4           | 57829  | 33.9% | 12.5% | 23.2% | 23.2% |
| STAT2         | 6773   | 30.4% | 18.4% | 20.8% | 23.2% |
| FLJ22624      | 79866  | 19.2% | 17.3% | 33.1% | 23.2% |
| HTO17         | 57408  | 14.3% | 24.3% | 31.0% | 23.2% |
| SCGB1D4       | 404552 | 23.2% | 23.3% | 23.1% | 23.2% |
| FLJ90119      | 144110 | 15.8% | 22.3% | 31.5% | 23.2% |
| JJAZ1         | 23512  | 28.6% | 19.4% | 21.6% | 23.2% |
| FLJ10287      | 54482  | 21.4% | 19.4% | 28.8% | 23.2% |
| PGK2          | 5232   | 24.9% | 27.8% | 16.8% | 23.2% |
| MGC30208      | 255043 | 22.8% | 22.3% | 24.5% | 23.2% |
| RAB8B         | 51762  | 31.9% | 20.1% | 17.6% | 23.2% |
| PHF19         | 26147  | 27.0% | 18.5% | 24.1% | 23.2% |
| TP53BP1       | 7158   | 25.2% | 22.9% | 21.5% | 23.2% |
| FBXO11        | 80204  | 27.4% | 22.6% | 19.5% | 23.2% |
| CD1A          | 909    | 27.2% | 22.1% | 20.3% | 23.2% |
| CALR3         | 125972 | 38.1% | 18.9% | 12.6% | 23.2% |
| OR4L1         | 122742 | 36.2% | 22.3% | 11.2% | 23.2% |
| GRK4          | 2868   | 26.5% | 20.7% | 22.4% | 23.2% |
| SORT1         | 6272   | 22.9% | 16.5% | 30.3% | 23.2% |
| LOC653566     | 653566 | 30.9% | 19.4% | 19.3% | 23.2% |
| SLC22A12      | 116085 | 29.9% | 19.4% | 20.3% | 23.2% |
| TACR1         | 6869   | 23.7% | 25.5% | 20.5% | 23.2% |
| CACNA2D2      | 9254   | 33.2% | 16.1% | 20.3% | 23.2% |
| OR4Q3         | 441669 | 22.2% | 22.7% | 24.7% | 23.2% |
| CRY1          | 1407   | 22.3% | 27.6% | 19.7% | 23.2% |
| GBA           | 2629   | 33.0% | 18.1% | 18.5% | 23.2% |
| SYT13         | 57586  | 18.4% | 23.9% | 27.3% | 23.2% |
| USP26         | 83844  | 21.5% | 25.2% | 23.0% | 23.2% |
| ZNF518        | 9849   | 36.5% | 21.5% | 11.6% | 23.2% |
| FOXE3         | 2301   | 29.5% | 21.3% | 18.8% | 23.2% |
| LOC93343      | 93343  | 30.6% | 12.3% | 26.7% | 23.2% |
| ICEBERG       | 59082  | 20.2% | 35.1% | 14.4% | 23.2% |
| BIN1          | 274    | 33.8% | 16.8% | 19.0% | 23.2% |
| C9ORF150      | 286343 | 34.2% | 17.2% | 18.2% | 23.2% |
| CUTL1         | 1523   | 37.1% | 11.3% | 21.2% | 23.2% |
| DVL3          | 1857   | 27.6% | 22.4% | 19.6% | 23.2% |
| HCRT          | 3060   | 27.6% | 26.4% | 15.6% | 23.2% |
| FAM26A        | 119395 | 23.6% | 28.1% | 18.0% | 23.2% |
| OR1A1         | 8383   | 21.1% | 25.0% | 23.6% | 23.2% |
| ARID4A        | 5926   | 26.2% | 25.1% | 18.4% | 23.2% |
| JRKL          | 8690   | 23.6% | 18.8% | 27.2% | 23.2% |

|               |        |       |       |       |       |
|---------------|--------|-------|-------|-------|-------|
| OR10Z1        | 128368 | 26.3% | 20.2% | 23.2% | 23.2% |
| UCP1          | 7350   | 38.1% | 10.0% | 21.6% | 23.2% |
| GABRG3        | 2567   | 23.3% | 18.0% | 28.4% | 23.2% |
| CDAN1         | 146059 | 24.6% | 20.7% | 24.4% | 23.2% |
| C14ORF80      | 283643 | 29.8% | 30.0% | 9.9%  | 23.2% |
| UMOD          | 7369   | 22.2% | 21.9% | 25.5% | 23.2% |
| DKFZP547A023  | 55917  | 22.4% | 19.9% | 27.4% | 23.2% |
| FREM1         | 158326 | 24.8% | 22.7% | 22.1% | 23.2% |
| GRN           | 2896   | 30.8% | 17.5% | 21.4% | 23.2% |
| DKFZP434G0625 | 91584  | 43.3% | 10.7% | 15.7% | 23.2% |
| DRF1          | 80174  | 18.1% | 24.8% | 26.8% | 23.2% |
| FXYD7         | 53822  | 26.6% | 22.5% | 20.6% | 23.2% |
| PRRG4         | 79056  | 24.6% | 20.7% | 24.4% | 23.2% |
| SNRPA         | 6626   | 34.3% | 14.1% | 21.2% | 23.2% |
| DNAJC4        | 3338   | 33.3% | 23.5% | 12.8% | 23.2% |
| PDE6B         | 5158   | 31.2% | 15.1% | 23.4% | 23.2% |
| PTPN12        | 5782   | 27.1% | 23.9% | 18.7% | 23.2% |
| PDE11A        | 50940  | 26.3% | 26.8% | 16.6% | 23.2% |
| LOC90167      | 90167  | 28.7% | 14.6% | 26.4% | 23.2% |
| CIA51         | 114548 | 36.4% | 14.2% | 19.1% | 23.2% |
| C18ORF4       | 92126  | 17.5% | 22.1% | 30.1% | 23.2% |
| LIM2          | 3982   | 26.8% | 17.2% | 25.7% | 23.2% |
| PTGS2         | 5743   | 32.9% | 15.5% | 21.3% | 23.2% |
| TMEM16B       | 57101  | 17.7% | 23.0% | 29.0% | 23.2% |
| CYP2A13       | 1553   | 34.1% | 15.8% | 19.8% | 23.2% |
| KYNU          | 8942   | 24.4% | 22.8% | 22.5% | 23.2% |
| TRPC4AP       | 26133  | 18.6% | 23.3% | 27.9% | 23.2% |
| CMRF-35H      | 11314  | 18.6% | 20.6% | 30.4% | 23.2% |
| NFE2L1        | 4779   | 29.4% | 19.0% | 21.3% | 23.2% |
| LITAF         | 9516   | 21.9% | 27.2% | 20.7% | 23.2% |
| MAPK6         | 5597   | 20.6% | 31.6% | 17.5% | 23.2% |
| USP6NL        | 9712   | 16.0% | 23.7% | 30.0% | 23.2% |
| FLJ25471      | 137902 | 25.2% | 26.5% | 18.0% | 23.2% |
| RBMY1E        | 378950 | 40.2% | 10.9% | 18.7% | 23.2% |
| ZNF214        | 7761   | 24.2% | 21.9% | 23.6% | 23.2% |
| CNN2          | 1265   | 23.7% | 22.7% | 23.3% | 23.2% |
| OR2TG         | 254879 | 12.6% | 22.3% | 34.9% | 23.2% |
| PRMT7         | 54496  | 34.9% | 18.6% | 16.3% | 23.2% |
| ATG4C         | 84938  | 27.2% | 22.9% | 19.7% | 23.3% |
| CRYBB2        | 1415   | 34.9% | 16.4% | 18.4% | 23.3% |
| STK11IP       | 114790 | 20.0% | 24.0% | 25.8% | 23.3% |
| ADAMTS18      | 170692 | 23.3% | 24.8% | 21.7% | 23.3% |
| HPX           | 3263   | 31.7% | 23.1% | 15.0% | 23.3% |
| ICMT          | 23463  | 31.0% | 16.1% | 22.7% | 23.3% |
| IL13RA1       | 3597   | 22.1% | 27.6% | 20.1% | 23.3% |
| POLH          | 5429   | 35.9% | 14.6% | 19.2% | 23.3% |
| SCUBE1        | 80274  | 25.9% | 18.5% | 25.3% | 23.3% |
| C10ORF74      | 221035 | 26.4% | 11.6% | 31.8% | 23.3% |
| CACNA1C       | 775    | 32.4% | 10.0% | 27.4% | 23.3% |
| MEIS1         | 4211   | 26.9% | 0.0%  | 42.9% | 23.3% |
| C9orf157      | 402381 | 24.8% | 19.1% | 25.9% | 23.3% |
| BIN3          | 55909  | 35.2% | 12.9% | 21.6% | 23.3% |
| HTR3E         | 285242 | 25.6% | 20.5% | 23.6% | 23.3% |
| TEX14         | 56155  | 20.6% | 27.8% | 21.4% | 23.3% |
| ATP5B         | 506    | 30.8% | 18.2% | 20.8% | 23.3% |
| AMPD3         | 272    | 31.9% | 9.0%  | 29.0% | 23.3% |
| SUPV3L1       | 6832   | 27.7% | 16.2% | 25.8% | 23.3% |
| COBLL1        | 22837  | 33.7% | 19.8% | 16.3% | 23.3% |
| MGC17943      | 90488  | 17.4% | 29.8% | 22.6% | 23.3% |
| TNNC1         | 7134   | 18.8% | 13.0% | 38.0% | 23.3% |
| GPAM          | 57678  | 19.4% | 28.4% | 22.0% | 23.3% |
| HPRT1         | 3251   | 18.9% | 23.7% | 27.2% | 23.3% |
| ALDH3B2       | 222    | 36.9% | 15.1% | 17.8% | 23.3% |
| CLPP          | 8192   | 18.9% | 38.1% | 12.9% | 23.3% |
| AGTR1         | 185    | 30.9% | 25.2% | 13.7% | 23.3% |
| TUBGCP2       | 10844  | 25.0% | 20.9% | 24.0% | 23.3% |
| SLC25A37      | 51312  | 32.7% | 12.6% | 24.5% | 23.3% |
| TAF4A         | 151647 | 25.0% | 12.7% | 32.2% | 23.3% |
| FBXO17        | 115290 | 27.9% | 16.1% | 25.8% | 23.3% |
| PDCD6IP       | 10015  | 14.9% | 21.6% | 33.3% | 23.3% |
| ZNF435        | 80345  | 21.6% | 16.8% | 31.4% | 23.3% |
| C20ORF161     | 90203  | 24.4% | 12.3% | 33.1% | 23.3% |
| FLJ39458      | 401474 | 14.6% | 19.7% | 35.5% | 23.3% |
| POLG2         | 11232  | 20.6% | 22.3% | 27.0% | 23.3% |
| LYRIC         | 92140  | 23.9% | 11.8% | 34.2% | 23.3% |
| SQLE          | 6713   | 17.0% | 27.8% | 25.1% | 23.3% |
| NCAM2         | 4685   | 30.8% | 31.5% | 7.6%  | 23.3% |
| APEH          | 327    | 30.1% | 18.6% | 21.1% | 23.3% |
| C16ORF35      | 8131   | 31.1% | 28.9% | 9.9%  | 23.3% |
| KCNJ3         | 3760   | 23.8% | 15.6% | 30.4% | 23.3% |
| NMUR2         | 56923  | 25.0% | 20.4% | 24.5% | 23.3% |
| CACNA1A       | 773    | 26.7% | 17.0% | 26.2% | 23.3% |
| ATP5C1        | 509    | 25.1% | 19.3% | 25.5% | 23.3% |
| CEBPA         | 1050   | 29.9% | 11.7% | 28.3% | 23.3% |
| FLJ14397      | 84865  | 14.6% | 23.4% | 31.9% | 23.3% |
| GOLGA3        | 2802   | 24.6% | 16.9% | 28.4% | 23.3% |
| GIC1          | 125111 | 38.8% | 16.7% | 14.3% | 23.3% |
| PRTG          | 283659 | 22.5% | 26.6% | 20.8% | 23.3% |
| STAB1         | 23166  | 25.7% | 20.5% | 23.7% | 23.3% |
| RP1-93H18.5   | 441168 | 14.0% | 23.7% | 32.2% | 23.3% |
| MGC39518      | 285172 | 22.0% | 9.6%  | 38.3% | 23.3% |
| KAAG1         | 353219 | 24.3% | 17.0% | 28.6% | 23.3% |
| MCF2L         | 23263  | 24.6% | 19.9% | 25.4% | 23.3% |
| SDHA          | 6389   | 23.2% | 19.4% | 27.3% | 23.3% |
| FDXR          | 2232   | 24.3% | 26.3% | 19.3% | 23.3% |
| TFAP2BL1      | 83741  | 39.5% | 10.1% | 20.4% | 23.3% |
| IFNA17        | 3451   | 24.5% | 25.1% | 20.3% | 23.3% |
| RHOG          | 391    | 25.2% | 19.5% | 25.2% | 23.3% |



|              |        |       |       |       |       |
|--------------|--------|-------|-------|-------|-------|
| MGC22793     | 221908 | 17.6% | 30.8% | 21.5% | 23.3% |
| GIB5         | 2709   | 35.8% | 13.7% | 20.4% | 23.3% |
| RY1          | 11017  | 32.3% | 15.0% | 22.6% | 23.3% |
| HOXA3        | 3200   | 31.4% | 20.6% | 17.9% | 23.3% |
| MYBPH        | 4608   | 15.3% | 24.2% | 30.4% | 23.3% |
| IDS          | 3423   | 32.5% | 14.2% | 23.2% | 23.3% |
| C1orf190     | 541468 | 23.8% | 28.3% | 17.9% | 23.3% |
| PPP1R2       | 5504   | 29.5% | 19.9% | 20.5% | 23.3% |
| SLC29A1      | 2030   | 27.7% | 14.7% | 27.6% | 23.3% |
| TMEM16A      | 55107  | 30.4% | 23.2% | 16.3% | 23.3% |
| H63          | 113201 | 33.3% | 14.3% | 22.3% | 23.3% |
| PDIR         | 10954  | 20.2% | 26.6% | 23.2% | 23.3% |
| MYLC2PL      | 93408  | 29.9% | 18.7% | 21.3% | 23.3% |
| RELN         | 5649   | 27.7% | 26.4% | 15.9% | 23.3% |
| MGAT1        | 4245   | 31.6% | 15.3% | 23.1% | 23.3% |
| ZNF36        | 7586   | 17.9% | 16.2% | 35.9% | 23.3% |
| TRPV1        | 7442   | 21.6% | 19.6% | 28.7% | 23.3% |
| ZIC3         | 7547   | 24.8% | 16.4% | 28.8% | 23.3% |
| C14ORF112    | 51241  | 25.7% | 22.0% | 22.2% | 23.3% |
| C13ORF3      | 221150 | 35.7% | 21.7% | 12.5% | 23.3% |
| DHTKD1       | 55526  | 21.1% | 18.4% | 30.4% | 23.3% |
| ZNF335       | 63925  | 34.4% | 13.2% | 22.4% | 23.3% |
| KIAA1913     | 114801 | 36.3% | 12.5% | 21.2% | 23.3% |
| GATA5        | 140628 | 36.3% | 12.8% | 20.9% | 23.3% |
| DKFZP564O243 | 25864  | 29.1% | 14.4% | 26.4% | 23.3% |
| C9ORF28      | 89853  | 28.1% | 18.1% | 23.8% | 23.3% |
| RAB3D        | 9545   | 25.3% | 27.2% | 17.5% | 23.3% |
| FLJ90575     | 257236 | 10.5% | 31.9% | 27.5% | 23.3% |
| EPLIN        | 51474  | 27.4% | 11.8% | 30.8% | 23.3% |
| ATP5F1       | 515    | 20.8% | 18.9% | 30.3% | 23.3% |
| CDRT1        | 374286 | 26.9% | 30.5% | 12.5% | 23.3% |
| HIP-55       | 28988  | 24.1% | 15.2% | 30.7% | 23.3% |
| IPO9         | 55705  | 35.7% | 14.9% | 19.4% | 23.3% |
| KIF2         | 3796   | 25.5% | 22.6% | 21.8% | 23.3% |
| DHX32        | 55760  | 29.3% | 24.1% | 16.5% | 23.3% |
| HOXA11       | 3207   | 30.6% | 14.0% | 25.3% | 23.3% |
| C20ORF103    | 24141  | 31.0% | 15.6% | 23.4% | 23.3% |
| FZD8         | 8325   | 22.6% | 23.9% | 23.5% | 23.3% |
| CARD9        | 64170  | 37.0% | 15.5% | 17.6% | 23.3% |
| FLJ40773     | 200150 | 23.7% | 22.9% | 23.4% | 23.3% |
| TBX15        | 6913   | 37.8% | 14.7% | 17.5% | 23.3% |
| USP52        | 9924   | 30.9% | 30.8% | 8.3%  | 23.3% |
| FLJ21924     | 79832  | 27.7% | 19.4% | 23.0% | 23.3% |
| FLJ32825     | 148870 | 26.1% | 10.7% | 33.2% | 23.3% |
| SLC17A6      | 57084  | 35.7% | 15.2% | 19.1% | 23.3% |
| ZNF566       | 84924  | 23.1% | 18.6% | 28.3% | 23.3% |
| KIAA0478     | 9923   | 19.8% | 18.4% | 31.9% | 23.3% |
| BOLL         | 66037  | 30.6% | 12.8% | 26.6% | 23.3% |
| C6ORF15      | 29113  | 29.8% | 16.5% | 23.8% | 23.3% |
| SRPK1        | 6732   | 28.5% | 22.9% | 18.7% | 23.3% |
| RPS27L       | 51065  | 24.1% | 19.2% | 26.8% | 23.3% |
| STK29        | 9024   | 19.2% | 36.1% | 14.8% | 23.3% |
| SALL1        | 6299   | 21.8% | 19.0% | 29.2% | 23.3% |
| ST3GAL4      | 6484   | 29.6% | 29.2% | 11.2% | 23.4% |
| FLJ13448     | 80219  | 19.9% | 22.3% | 27.8% | 23.4% |
| PSG11        | 5680   | 21.1% | 25.0% | 24.0% | 23.4% |
| MIDORI       | 57538  | 25.0% | 30.8% | 14.3% | 23.4% |
| HMP19        | 51617  | 30.2% | 19.5% | 20.4% | 23.4% |
| TNPO1        | 3842   | 30.5% | 19.0% | 20.6% | 23.4% |
| ITCH         | 83737  | 29.2% | 15.6% | 25.2% | 23.4% |
| MGC39350     | 159013 | 19.9% | 25.2% | 24.9% | 23.4% |
| SNURF        | 8926   | 19.2% | 20.7% | 30.1% | 23.4% |
| USP11        | 8237   | 25.3% | 18.8% | 25.9% | 23.4% |
| C9ORF126     | 286205 | 26.7% | 20.7% | 22.7% | 23.4% |
| LOC199964    | 199964 | 21.1% | 18.0% | 31.0% | 23.4% |
| PKD2L2       | 27039  | 28.6% | 17.8% | 23.7% | 23.4% |
| LW-1         | 51402  | 16.6% | 17.2% | 36.3% | 23.4% |
| MTO1         | 25821  | 23.4% | 27.3% | 19.4% | 23.4% |
| PDGFD        | 80310  | 27.4% | 21.6% | 21.1% | 23.4% |
| PRDM15       | 63977  | 27.7% | 24.1% | 18.3% | 23.4% |
| INSL4        | 3641   | 31.3% | 22.0% | 16.8% | 23.4% |
| ADCYAP1      | 116    | 25.9% | 21.1% | 23.2% | 23.4% |
| C17ORF28     | 283987 | 31.3% | 19.1% | 19.6% | 23.4% |
| CCKAR        | 886    | 28.5% | 23.9% | 17.6% | 23.4% |
| SIRT2        | 22933  | 36.5% | 9.1%  | 24.5% | 23.4% |
| LOC284194    | 284194 | 28.8% | 25.0% | 16.3% | 23.4% |
| DKFZP547N043 | 83932  | 19.3% | 13.2% | 37.6% | 23.4% |
| BEX1         | 55859  | 29.6% | 22.5% | 17.9% | 23.4% |
| FLJ14007     | 79752  | 25.8% | 14.0% | 30.3% | 23.4% |
| BBS4         | 585    | 31.7% | 20.5% | 17.8% | 23.4% |
| CD276        | 80381  | 35.6% | 12.7% | 21.7% | 23.4% |
| MKKS         | 8195   | 20.3% | 28.8% | 21.1% | 23.4% |
| LOC124491    | 124491 | 26.1% | 18.3% | 25.7% | 23.4% |
| 182-FIP      | 57532  | 24.9% | 13.1% | 32.1% | 23.4% |
| PGCP         | 10404  | 24.7% | 24.9% | 20.6% | 23.4% |
| GALNT3       | 2591   | 18.3% | 21.9% | 29.9% | 23.4% |
| TGIF2        | 60436  | 29.7% | 16.1% | 24.3% | 23.4% |
| TRIM6        | 117854 | 29.8% | 12.9% | 27.4% | 23.4% |
| PMPCA        | 23203  | 21.3% | 26.7% | 22.1% | 23.4% |
| VPS41        | 27072  | 24.6% | 20.5% | 25.0% | 23.4% |
| HSPC105      | 93517  | 39.6% | 12.7% | 17.8% | 23.4% |
| PROX1        | 5629   | 27.2% | 18.8% | 24.2% | 23.4% |
| CLCN7        | 1186   | 32.5% | 10.5% | 27.2% | 23.4% |
| ZCCHC6       | 79670  | 29.2% | 26.5% | 14.5% | 23.4% |
| LOC150763    | 150763 | 27.4% | 13.3% | 29.5% | 23.4% |
| MGC33607     | 256309 | 21.0% | 14.9% | 34.2% | 23.4% |
| IF           | 3426   | 30.4% | 19.8% | 20.0% | 23.4% |
| ORS2N1       | 79473  | 24.7% | 23.0% | 22.5% | 23.4% |

|               |        |       |       |       |       |
|---------------|--------|-------|-------|-------|-------|
| THSD3         | 145501 | 23.5% | 25.1% | 21.6% | 23.4% |
| TBP           | 6908   | 21.4% | 13.2% | 35.5% | 23.4% |
| SETDB2        | 83852  | 29.7% | 9.2%  | 31.2% | 23.4% |
| LRTM2         | 654429 | 31.3% | 17.9% | 21.0% | 23.4% |
| SNAPC4        | 6621   | 34.0% | 18.3% | 17.9% | 23.4% |
| F3            | 2152   | 34.2% | 13.7% | 22.3% | 23.4% |
| LOC150159     | 150159 | 19.0% | 19.0% | 32.2% | 23.4% |
| OR10W1        | 81341  | 17.2% | 41.0% | 11.9% | 23.4% |
| KCNK2         | 3776   | 26.6% | 13.6% | 29.9% | 23.4% |
| CDH24         | 64403  | 14.4% | 25.3% | 30.4% | 23.4% |
| C6ORF194      | 222698 | 20.2% | 20.2% | 29.8% | 23.4% |
| AKR1CL1       | 340811 | 13.8% | 23.2% | 33.2% | 23.4% |
| NDFIP2        | 54602  | 14.3% | 25.8% | 30.1% | 23.4% |
| TAO1          | 9344   | 29.6% | 23.3% | 17.3% | 23.4% |
| P11           | 8909   | 26.9% | 16.0% | 27.3% | 23.4% |
| FANK1         | 92565  | 26.9% | 16.0% | 27.2% | 23.4% |
| LOC388722     | 388722 | 18.6% | 24.6% | 27.0% | 23.4% |
| PDE2A         | 5138   | 23.0% | 23.0% | 24.2% | 23.4% |
| RASGRF1       | 5923   | 14.1% | 30.0% | 26.1% | 23.4% |
| ZBTB4         | 57659  | 22.3% | 18.5% | 29.4% | 23.4% |
| RELL1         | 768211 | 25.6% | 23.3% | 21.3% | 23.4% |
| ARHGFE9       | 23229  | 27.2% | 22.6% | 20.4% | 23.4% |
| ANGPT1        | 284    | 28.7% | 18.4% | 23.1% | 23.4% |
| ANKRD7        | 56311  | 24.5% | 28.3% | 17.5% | 23.4% |
| C19ORF12      | 83636  | 31.6% | 19.9% | 18.7% | 23.4% |
| EFHD1         | 80303  | 34.7% | 11.9% | 23.6% | 23.4% |
| WDR44         | 54521  | 10.6% | 26.5% | 33.1% | 23.4% |
| SBB154        | 126119 | 13.3% | 27.8% | 29.1% | 23.4% |
| SLC31A1       | 1317   | 19.3% | 15.1% | 35.8% | 23.4% |
| ZNF415        | 55786  | 33.7% | 10.0% | 26.5% | 23.4% |
| FLJ20071      | 54808  | 30.1% | 17.0% | 23.0% | 23.4% |
| APBB1IP       | 54518  | 28.1% | 14.6% | 27.5% | 23.4% |
| MGC70857      | 414919 | 23.1% | 21.8% | 25.3% | 23.4% |
| FLJ14800      | 84926  | 19.3% | 12.6% | 38.4% | 23.4% |
| C6ORF153      | 88745  | 21.5% | 28.9% | 19.9% | 23.4% |
| HMG1L1        | 10357  | 33.9% | 12.7% | 23.7% | 23.4% |
| OR51D1        | 390038 | 25.0% | 20.0% | 25.3% | 23.4% |
| FLJ25059      | 196294 | 47.8% | 5.2%  | 17.3% | 23.4% |
| HGF           | 3082   | 22.5% | 22.5% | 25.3% | 23.4% |
| LDB3          | 11155  | 29.9% | 25.1% | 15.3% | 23.4% |
| ACE           | 1636   | 31.8% | 23.6% | 14.9% | 23.4% |
| KIAA1727      | 85462  | 29.1% | 22.6% | 18.6% | 23.4% |
| NAB1          | 4664   | 22.4% | 14.3% | 33.6% | 23.4% |
| RANGNRF       | 29098  | 19.8% | 24.1% | 26.4% | 23.4% |
| FLJ10803      | 55744  | 18.5% | 19.9% | 31.8% | 23.4% |
| LOC164045     | 164045 | 26.8% | 16.6% | 26.9% | 23.4% |
| OR1J4         | 26219  | 25.2% | 23.0% | 22.1% | 23.4% |
| KLK8          | 11202  | 20.8% | 25.9% | 23.5% | 23.4% |
| LYSAL1        | 9583   | 24.8% | 18.4% | 27.2% | 23.4% |
| DKFZP564G2022 | 25963  | 18.8% | 19.6% | 32.0% | 23.4% |
| LOX           | 4015   | 25.1% | 23.2% | 22.0% | 23.4% |
| EPN2          | 22905  | 23.7% | 17.0% | 29.6% | 23.4% |
| C10orf8       | 390664 | 27.8% | 16.4% | 26.1% | 23.4% |
| LOC554251     | 554251 | 28.2% | 17.0% | 25.1% | 23.4% |
| FLJ23588      | 64800  | 35.2% | 13.9% | 21.2% | 23.4% |
| KIAA1009      | 22832  | 13.1% | 22.1% | 35.1% | 23.4% |
| FBXL18        | 80028  | 30.0% | 13.4% | 26.9% | 23.4% |
| FLJ10581      | 55178  | 35.1% | 13.0% | 22.2% | 23.4% |
| HAMP          | 57817  | 30.0% | 25.2% | 15.1% | 23.4% |
| TBC1D2        | 55357  | 25.4% | 18.3% | 26.5% | 23.4% |
| LOC345222     | 345222 | 30.0% | 16.6% | 23.7% | 23.4% |
| HIG1          | 25994  | 20.3% | 13.6% | 36.3% | 23.4% |
| LOC115950     | 115950 | 19.9% | 12.0% | 38.3% | 23.4% |
| PDCC1         | 5133   | 25.3% | 23.3% | 21.8% | 23.4% |
| FLJ10726      | 55216  | 27.9% | 14.3% | 28.2% | 23.4% |
| C21ORF58      | 54058  | 26.7% | 19.0% | 24.7% | 23.4% |
| PSAT1         | 29968  | 33.6% | 12.2% | 24.6% | 23.4% |
| SNX17         | 9784   | 22.5% | 19.8% | 28.0% | 23.4% |
| LSM7          | 51690  | 19.4% | 20.0% | 30.9% | 23.4% |
| ESSPL         | 345062 | 27.7% | 18.2% | 24.4% | 23.4% |
| PTGER2        | 5732   | 22.3% | 23.5% | 24.5% | 23.4% |
| PEX5L         | 51555  | 23.5% | 15.2% | 31.6% | 23.4% |
| MGC5987       | 145553 | 24.0% | 18.9% | 27.4% | 23.4% |
| MGC10986      | 80774  | 21.1% | 22.7% | 26.6% | 23.4% |
| P2RX5         | 5026   | 34.2% | 11.3% | 24.8% | 23.4% |
| TAS2R7        | 50837  | 25.0% | 27.4% | 17.9% | 23.4% |
| LMAN2L        | 81562  | 28.0% | 21.8% | 20.5% | 23.4% |
| NRK           | 203447 | 24.5% | 23.0% | 22.8% | 23.4% |
| ACSL5         | 51703  | 32.2% | 17.0% | 21.1% | 23.4% |
| CXCL1         | 2919   | 19.9% | 25.2% | 25.3% | 23.4% |
| ZNF19         | 7567   | 28.5% | 20.2% | 21.6% | 23.4% |
| BHMT2         | 23743  | 46.2% | 5.8%  | 18.3% | 23.4% |
| OR10P1        | 121130 | 29.7% | 30.0% | 10.7% | 23.4% |
| EID3          | 493861 | 27.8% | 18.4% | 24.2% | 23.4% |
| FLJ42486      | 388021 | 17.1% | 24.9% | 28.4% | 23.5% |
| KRTAP20-1     | 337975 | 28.7% | 21.3% | 20.3% | 23.5% |
| ELP3          | 55140  | 29.9% | 17.4% | 23.1% | 23.5% |
| OR52E6        | 390078 | 25.4% | 22.3% | 22.6% | 23.5% |
| C11ORF2       | 738    | 34.1% | 18.2% | 18.1% | 23.5% |
| ZDHC12        | 84885  | 19.8% | 28.1% | 22.5% | 23.5% |
| DPP9          | 91039  | 29.7% | 18.6% | 22.0% | 23.5% |
| ZNF16         | 7564   | 21.2% | 28.6% | 20.6% | 23.5% |
| PTPN6         | 5777   | 25.7% | 24.4% | 20.2% | 23.5% |
| KIAA0182      | 23199  | 33.1% | 17.2% | 20.1% | 23.5% |
| ATP13A3       | 79572  | 29.4% | 20.2% | 20.8% | 23.5% |
| EPB41L4A      | 64097  | 19.5% | 23.0% | 27.8% | 23.5% |
| SPRYD5        | 84767  | 20.6% | 22.2% | 27.6% | 23.5% |
| APLP2         | 334    | 30.0% | 20.8% | 19.6% | 23.5% |

|           |        |       |       |       |       |
|-----------|--------|-------|-------|-------|-------|
| SIVA      | 10572  | 30.9% | 22.8% | 16.7% | 23.5% |
| EVC2      | 132884 | 33.4% | 13.9% | 23.0% | 23.5% |
| TBK1      | 29110  | 24.9% | 22.9% | 22.5% | 23.5% |
| CLCA2     | 9635   | 27.4% | 19.5% | 23.5% | 23.5% |
| CABYR     | 26256  | 19.5% | 22.0% | 28.9% | 23.5% |
| MASA      | 58478  | 25.0% | 19.3% | 26.1% | 23.5% |
| KLK13     | 26085  | 25.0% | 22.8% | 22.6% | 23.5% |
| CD3D      | 915    | 26.3% | 19.7% | 24.4% | 23.5% |
| OR13G1    | 441933 | 30.8% | 19.1% | 20.6% | 23.5% |
| FLJ23074  | 80122  | 24.6% | 21.1% | 24.7% | 23.5% |
| OR5T1     | 390155 | 25.6% | 20.3% | 24.4% | 23.5% |
| DRP2      | 1821   | 30.9% | 14.6% | 24.9% | 23.5% |
| MAPK8     | 5599   | 20.8% | 29.2% | 20.4% | 23.5% |
| LRRIQ2    | 79598  | 29.9% | 25.0% | 15.5% | 23.5% |
| CGI-09    | 51605  | 31.8% | 15.3% | 23.3% | 23.5% |
| HIP2      | 3093   | 26.0% | 20.7% | 23.8% | 23.5% |
| GNPMB     | 10457  | 18.2% | 20.8% | 31.3% | 23.5% |
| KCNF1     | 3754   | 28.8% | 19.6% | 22.1% | 23.5% |
| IL5RA     | 3568   | 34.8% | 14.3% | 21.4% | 23.5% |
| NCOR1     | 9611   | 29.0% | 18.8% | 22.7% | 23.5% |
| MTFMT     | 123263 | 26.8% | 23.9% | 19.7% | 23.5% |
| SH120     | 51463  | 24.4% | 18.9% | 27.1% | 23.5% |
| MAGEA8    | 4107   | 33.6% | 22.7% | 14.2% | 23.5% |
| HIPK3     | 10114  | 26.2% | 27.0% | 17.3% | 23.5% |
| SNRPE     | 6635   | 27.7% | 25.5% | 17.3% | 23.5% |
| DLL3      | 10683  | 37.0% | 22.2% | 11.2% | 23.5% |
| HLA-DQA1  | 3117   | 36.4% | 15.2% | 18.8% | 23.5% |
| SLC18A2   | 6571   | 28.0% | 22.3% | 20.2% | 23.5% |
| CLEC10A   | 10462  | 31.1% | 18.2% | 21.1% | 23.5% |
| MGC29643  | 116372 | 20.4% | 14.5% | 35.6% | 23.5% |
| MGC33926  | 130733 | 25.0% | 13.3% | 32.2% | 23.5% |
| AP1S1     | 1174   | 28.7% | 23.3% | 18.5% | 23.5% |
| TOPBP1    | 11073  | 17.2% | 24.9% | 28.4% | 23.5% |
| TAF4      | 6874   | 26.0% | 18.4% | 26.1% | 23.5% |
| CLCA1     | 1179   | 32.5% | 13.6% | 24.3% | 23.5% |
| FLJ32310  | 123624 | 27.7% | 17.6% | 25.2% | 23.5% |
| ANKRD13   | 88455  | 23.0% | 12.5% | 35.0% | 23.5% |
| PODN      | 127435 | 27.5% | 19.6% | 23.3% | 23.5% |
| ATOH1     | 474    | 31.4% | 17.4% | 21.7% | 23.5% |
| USP35     | 57558  | 30.6% | 15.6% | 24.3% | 23.5% |
| C20ORF108 | 116151 | 26.5% | 23.3% | 20.7% | 23.5% |
| ACCN5     | 51802  | 37.1% | 12.8% | 20.5% | 23.5% |
| CDY       | 203611 | 17.0% | 28.8% | 24.7% | 23.5% |
| HARSL     | 23438  | 23.2% | 29.5% | 17.7% | 23.5% |
| DNAH9     | 1770   | 25.9% | 26.4% | 18.2% | 23.5% |
| PTF1A     | 256297 | 42.3% | 13.8% | 14.3% | 23.5% |
| JUB       | 84962  | 31.9% | 17.1% | 21.6% | 23.5% |
| FLJ23451  | 79823  | 21.9% | 16.7% | 31.9% | 23.5% |
| CPSF5     | 11051  | 17.0% | 22.9% | 30.5% | 23.5% |
| EML5      | 161436 | 29.5% | 12.5% | 28.5% | 23.5% |
| SKB1      | 10419  | 24.3% | 24.2% | 22.0% | 23.5% |
| INPP4A    | 3631   | 18.4% | 30.7% | 21.4% | 23.5% |
| WRNIP1    | 56897  | 36.1% | 19.3% | 15.2% | 23.5% |
| NME1      | 4830   | 26.5% | 16.9% | 27.1% | 23.5% |
| OR4F5     | 79501  | 15.3% | 33.3% | 21.9% | 23.5% |
| NSDHL     | 50814  | 33.5% | 21.5% | 15.5% | 23.5% |
| RCP9      | 27297  | 10.5% | 26.3% | 33.7% | 23.5% |
| LIPE      | 3991   | 31.0% | 18.1% | 21.5% | 23.5% |
| ORSU1     | 442191 | 21.3% | 20.7% | 28.5% | 23.5% |
| DGAT2L3   | 158833 | 25.0% | 23.8% | 21.8% | 23.5% |
| ZNF339    | 58495  | 17.0% | 25.0% | 28.6% | 23.5% |
| HEXA      | 3073   | 31.9% | 17.2% | 21.4% | 23.5% |
| TAS2R14   | 50840  | 25.3% | 14.7% | 30.6% | 23.5% |
| FLJ10652  | 55196  | 25.7% | 14.3% | 30.6% | 23.5% |
| HSPC182   | 29101  | 19.2% | 15.4% | 36.0% | 23.5% |
| UBE2A     | 7319   | 27.8% | 18.9% | 23.9% | 23.5% |
| FLJ2494   | 79873  | 21.0% | 17.6% | 32.0% | 23.5% |
| MMRP19    | 51074  | 15.6% | 20.4% | 34.6% | 23.5% |
| PIPSK2B   | 8396   | 15.9% | 27.1% | 27.5% | 23.5% |
| LGMN      | 5641   | 26.3% | 16.8% | 27.5% | 23.5% |
| ACAT2     | 39     | 40.4% | 14.2% | 15.9% | 23.5% |
| FOXA2     | 3170   | 21.7% | 20.0% | 28.8% | 23.5% |
| NSUN2     | 54888  | 16.7% | 26.9% | 27.0% | 23.5% |
| MEOX2     | 4223   | 23.7% | 16.6% | 30.3% | 23.5% |
| BID       | 637    | 30.5% | 18.0% | 22.1% | 23.5% |
| EVER1     | 11322  | 32.4% | 19.6% | 18.6% | 23.5% |
| OTC       | 5009   | 19.6% | 25.8% | 25.2% | 23.5% |
| SIRT7     | 51547  | 24.9% | 20.4% | 25.3% | 23.5% |
| PAX6      | 5080   | 27.0% | 21.5% | 22.1% | 23.5% |
| FLJ20257  | 56257  | 21.9% | 26.3% | 22.5% | 23.5% |
| PAX2      | 5076   | 24.0% | 20.6% | 26.0% | 23.5% |
| C18ORF1   | 753    | 27.5% | 14.2% | 28.9% | 23.5% |
| PCDH84    | 56131  | 25.0% | 24.0% | 21.6% | 23.5% |
| PCOTH     | 542767 | 37.9% | 18.0% | 14.7% | 23.5% |
| SSBP3     | 23648  | 25.8% | 19.2% | 25.6% | 23.5% |
| MXRA7     | 439921 | 8.1%  | 41.5% | 21.0% | 23.5% |
| ZBTB16    | 7704   | 25.8% | 28.5% | 16.4% | 23.5% |
| CRKL      | 1399   | 18.3% | 24.0% | 28.4% | 23.5% |
| PHF3      | 23469  | 19.2% | 17.4% | 34.1% | 23.5% |
| ERG       | 2078   | 32.5% | 15.6% | 22.6% | 23.5% |
| FLJ10374  | 55702  | 18.6% | 21.2% | 30.8% | 23.5% |
| PIPSK1B   | 8395   | 22.1% | 28.7% | 19.8% | 23.5% |
| COX4I2    | 84701  | 27.7% | 13.7% | 29.2% | 23.5% |
| C7ORF32   | 155066 | 19.9% | 26.5% | 24.2% | 23.5% |
| LIN28     | 79727  | 29.2% | 19.4% | 22.0% | 23.5% |
| MGC11349  | 79364  | 23.5% | 19.6% | 27.5% | 23.5% |
| AKR1B10   | 57016  | 25.7% | 25.7% | 19.3% | 23.5% |
| USP44     | 84101  | 23.1% | 19.1% | 28.5% | 23.5% |

|           |        |       |       |       |       |
|-----------|--------|-------|-------|-------|-------|
| MXD4      | 10608  | 17.3% | 33.1% | 20.2% | 23.5% |
| GF1B      | 8328   | 33.5% | 15.9% | 21.2% | 23.5% |
| UHKM1     | 127933 | 27.6% | 24.2% | 18.9% | 23.5% |
| WNT10A    | 80326  | 24.1% | 17.9% | 28.7% | 23.5% |
| C11ORF15  | 56674  | 19.5% | 17.4% | 33.8% | 23.6% |
| KCNJ4     | 3761   | 33.7% | 13.6% | 23.3% | 23.6% |
| JARID1C   | 8242   | 27.6% | 22.6% | 20.5% | 23.6% |
| RINT-1    | 60561  | 22.9% | 22.0% | 25.7% | 23.6% |
| MRPS11    | 64963  | 33.0% | 11.9% | 25.8% | 23.6% |
| P2RX4     | 5025   | 32.4% | 7.9%  | 30.4% | 23.6% |
| PPP1R15B  | 84919  | 33.6% | 19.2% | 17.8% | 23.6% |
| MGC4562   | 115752 | 14.8% | 28.1% | 27.8% | 23.6% |
| C9ORF98   | 158067 | 33.1% | 16.7% | 20.9% | 23.6% |
| SULT4A1   | 25830  | 34.5% | 9.7%  | 26.5% | 23.6% |
| APBB2     | 323    | 24.4% | 19.8% | 26.4% | 23.6% |
| PAPOLG    | 64895  | 27.5% | 18.8% | 24.3% | 23.6% |
| PDZK11    | 51248  | 14.7% | 19.8% | 36.1% | 23.6% |
| LOC340351 | 340351 | 20.1% | 15.4% | 35.2% | 23.6% |
| MGC72075  | 340277 | 12.7% | 26.5% | 31.4% | 23.6% |
| SBDS      | 51119  | 24.5% | 22.2% | 24.1% | 23.6% |
| LOC51035  | 51035  | 11.5% | 38.5% | 20.7% | 23.6% |
| SIRT4     | 23409  | 27.7% | 23.2% | 19.8% | 23.6% |
| FLJ10055  | 55062  | 19.4% | 20.0% | 31.3% | 23.6% |
| NUP62     | 23636  | 17.9% | 31.5% | 21.2% | 23.6% |
| DDEF2     | 8853   | 20.3% | 25.9% | 24.5% | 23.6% |
| KIAA1737  | 85457  | 32.9% | 12.1% | 25.7% | 23.6% |
| GPR81     | 27198  | 22.9% | 24.4% | 23.4% | 23.6% |
| LCN10     | 414332 | 30.7% | 16.0% | 24.0% | 23.6% |
| CYP27A1   | 1593   | 25.4% | 18.3% | 27.0% | 23.6% |
| KRT6IRS   | 112802 | 23.8% | 25.1% | 21.7% | 23.6% |
| SF1       | 7536   | 25.0% | 16.4% | 29.3% | 23.6% |
| UCP3      | 7352   | 23.1% | 23.3% | 24.3% | 23.6% |
| MMP7      | 4316   | 32.5% | 15.5% | 22.6% | 23.6% |
| ADM2      | 79924  | 33.8% | 21.8% | 15.1% | 23.6% |
| COX5A     | 9377   | 35.9% | 11.9% | 23.0% | 23.6% |
| LOXL2     | 4017   | 19.2% | 25.4% | 26.1% | 23.6% |
| C9ORF103  | 414328 | 21.6% | 19.4% | 29.8% | 23.6% |
| UFD1L     | 7353   | 23.7% | 26.9% | 20.1% | 23.6% |
| HSF2BP    | 11077  | 22.2% | 20.2% | 28.3% | 23.6% |
| C3ORF10   | 55845  | 29.6% | 13.3% | 27.8% | 23.6% |
| CAMK1     | 8536   | 26.3% | 22.5% | 21.9% | 23.6% |
| KIAA1345  | 57545  | 21.0% | 26.9% | 22.8% | 23.6% |
| GADD45B   | 4616   | 26.1% | 27.3% | 17.3% | 23.6% |
| P53AIP1   | 63970  | 14.4% | 30.5% | 25.9% | 23.6% |
| TAAAR9    | 134860 | 27.2% | 24.5% | 19.1% | 23.6% |
| MDM1      | 56890  | 33.0% | 13.0% | 24.8% | 23.6% |
| TCEAL8    | 90843  | 20.5% | 14.2% | 36.0% | 23.6% |
| HEY1      | 23462  | 33.3% | 17.8% | 19.6% | 23.6% |
| HOXD13    | 3239   | 29.3% | 16.7% | 24.7% | 23.6% |
| SFRS5     | 6430   | 19.4% | 26.3% | 25.1% | 23.6% |
| FLJ22671  | 79919  | 26.7% | 21.9% | 22.2% | 23.6% |
| MAP2K1    | 5604   | 21.4% | 31.3% | 18.0% | 23.6% |
| SPANXB1   | 728695 | 33.1% | 11.3% | 26.3% | 23.6% |
| GJA7      | 10052  | 38.1% | 14.5% | 18.1% | 23.6% |
| HYAL4     | 23553  | 25.7% | 19.9% | 25.2% | 23.6% |
| GALNACT-2 | 55454  | 27.5% | 23.8% | 19.5% | 23.6% |
| PITPNM2   | 57605  | 31.0% | 10.9% | 28.9% | 23.6% |
| PPFIA1    | 8500   | 24.6% | 29.2% | 17.0% | 23.6% |
| FLJ20534  | 54969  | 19.1% | 22.8% | 28.9% | 23.6% |
| FLJ33814  | 150275 | 25.2% | 14.9% | 30.7% | 23.6% |
| RABL5     | 64792  | 33.3% | 16.8% | 20.7% | 23.6% |
| SMBP      | 56889  | 26.6% | 21.2% | 23.0% | 23.6% |
| PPIL3     | 53938  | 22.0% | 24.5% | 24.3% | 23.6% |
| U2AF1L2   | 8233   | 19.8% | 22.6% | 28.4% | 23.6% |
| ZNF496    | 84838  | 26.0% | 20.7% | 24.1% | 23.6% |
| GCS1      | 7841   | 34.5% | 11.9% | 24.5% | 23.6% |
| GLS2      | 27165  | 26.6% | 19.1% | 25.1% | 23.6% |
| TOCA1     | 54874  | 22.1% | 17.8% | 30.9% | 23.6% |
| ZBTB2     | 57621  | 24.5% | 25.9% | 20.5% | 23.6% |
| RPGR      | 6103   | 15.1% | 27.3% | 28.4% | 23.6% |
| CLGN      | 1047   | 20.6% | 23.3% | 27.0% | 23.6% |
| LOC128153 | 128153 | 30.1% | 17.4% | 23.3% | 23.6% |
| SERPINA12 | 145264 | 26.4% | 28.5% | 15.9% | 23.6% |
| FGF6      | 2251   | 23.3% | 25.0% | 22.5% | 23.6% |
| TMEM1     | 7109   | 29.9% | 23.1% | 17.8% | 23.6% |
| GMDS      | 2762   | 25.4% | 15.5% | 30.0% | 23.6% |
| CSE-C     | 54414  | 20.6% | 17.5% | 32.8% | 23.6% |
| TAF4B     | 6875   | 23.7% | 21.0% | 26.2% | 23.6% |
| OSM       | 5008   | 36.5% | 21.7% | 12.7% | 23.6% |
| STK3      | 6788   | 14.9% | 29.8% | 26.1% | 23.6% |
| DSP       | 1832   | 32.6% | 18.8% | 19.6% | 23.6% |
| BLMH      | 642    | 25.2% | 20.3% | 25.4% | 23.6% |
| NOR1      | 127700 | 25.9% | 24.4% | 20.5% | 23.6% |
| HDAC6     | 10013  | 31.5% | 15.5% | 23.9% | 23.6% |
| MGC11308  | 84975  | 24.7% | 12.7% | 33.5% | 23.6% |
| BTLA      | 151888 | 23.1% | 25.9% | 21.9% | 23.6% |
| C22ORF18  | 79019  | 24.5% | 32.7% | 13.7% | 23.6% |
| LOC124245 | 124245 | 18.3% | 25.4% | 27.2% | 23.6% |
| WDR17     | 116966 | 23.2% | 17.1% | 30.6% | 23.6% |
| AP1G1     | 164    | 25.3% | 22.7% | 22.9% | 23.6% |
| AP3M2     | 10947  | 31.6% | 15.6% | 23.7% | 23.6% |
| SEMA6C    | 10500  | 27.1% | 22.4% | 21.4% | 23.6% |
| BRAF      | 673    | 30.8% | 22.2% | 17.9% | 23.6% |
| TIRP      | 353376 | 22.8% | 17.7% | 30.4% | 23.6% |
| SLC5A3    | 6526   | 23.6% | 22.7% | 24.6% | 23.6% |
| ZNF501    | 115560 | 30.2% | 19.4% | 21.3% | 23.6% |
| SLC35B1   | 10237  | 38.2% | 12.2% | 20.5% | 23.6% |
| C10ORF59  | 55328  | 25.8% | 28.9% | 16.2% | 23.6% |

|               |        |       |       |       |       |
|---------------|--------|-------|-------|-------|-------|
| FERD3L        | 222894 | 28.6% | 21.1% | 21.2% | 23.6% |
| CELSR1        | 9620   | 28.1% | 20.9% | 21.9% | 23.6% |
| DNASE2        | 1777   | 27.5% | 18.8% | 24.6% | 23.6% |
| MPP7          | 143098 | 33.9% | 23.1% | 13.9% | 23.6% |
| KIAA0912      | 22995  | 19.9% | 16.2% | 34.9% | 23.6% |
| PAPSS2        | 9060   | 26.0% | 16.0% | 28.9% | 23.6% |
| ZAP128        | 10965  | 24.1% | 20.6% | 26.2% | 23.6% |
| NXK6-1        | 4825   | 38.0% | 17.3% | 15.6% | 23.6% |
| RASGRP1       | 10125  | 29.3% | 20.9% | 20.7% | 23.6% |
| ITGBL1        | 9358   | 9.2%  | 27.3% | 34.4% | 23.6% |
| B3GTL         | 145173 | 20.1% | 13.4% | 37.4% | 23.6% |
| FLJ10375      | 55129  | 10.1% | 26.3% | 34.5% | 23.6% |
| DPM2          | 8818   | 20.0% | 35.1% | 15.8% | 23.6% |
| LOC338761     | 338761 | 20.4% | 16.0% | 34.5% | 23.6% |
| DYRK4         | 8798   | 27.1% | 24.1% | 19.6% | 23.6% |
| KIAA0117      | 23029  | 20.6% | 21.2% | 29.1% | 23.6% |
| LOC286187     | 286187 | 37.9% | 19.5% | 13.6% | 23.6% |
| PSENE1        | 55851  | 38.5% | 21.5% | 11.0% | 23.6% |
| MGC11324      | 84803  | 25.4% | 18.0% | 27.5% | 23.6% |
| LEPREL2       | 10536  | 28.3% | 23.9% | 18.7% | 23.6% |
| CDR2          | 1039   | 33.3% | 5.3%  | 32.4% | 23.6% |
| SPATA7        | 55812  | 12.6% | 30.4% | 28.0% | 23.7% |
| IGF1          | 3479   | 19.1% | 30.8% | 21.0% | 23.7% |
| CAMTA2        | 23125  | 34.9% | 17.9% | 18.2% | 23.7% |
| CCNL1         | 57018  | 28.1% | 19.9% | 22.9% | 23.7% |
| CHKB          | 1120   | 24.6% | 30.3% | 16.1% | 23.7% |
| DKFZP434B1231 | 91156  | 24.0% | 21.5% | 25.4% | 23.7% |
| BGN           | 633    | 31.4% | 14.5% | 25.1% | 23.7% |
| UNC13A        | 23025  | 27.7% | 28.3% | 14.9% | 23.7% |
| PSG8          | 440533 | 18.6% | 24.3% | 28.1% | 23.7% |
| TMEM49        | 81671  | 26.0% | 20.0% | 25.0% | 23.7% |
| PTDSS1        | 9791   | 27.2% | 23.8% | 20.0% | 23.7% |
| PTPRA         | 5786   | 33.5% | 22.7% | 14.7% | 23.7% |
| KIAA1190      | 92999  | 20.8% | 20.9% | 29.3% | 23.7% |
| BMX           | 660    | 23.7% | 26.9% | 20.3% | 23.7% |
| RFX1          | 5989   | 25.9% | 16.0% | 29.1% | 23.7% |
| ZNF398        | 57541  | 29.7% | 21.5% | 19.8% | 23.7% |
| TAF6          | 6878   | 18.0% | 34.5% | 18.5% | 23.7% |
| TRIM43        | 129868 | 31.7% | 22.7% | 16.6% | 23.7% |
| OCLN          | 4950   | 35.7% | 15.0% | 20.2% | 23.7% |
| PGBD2         | 267002 | 22.4% | 18.3% | 30.3% | 23.7% |
| HTR2B         | 3357   | 25.4% | 22.2% | 23.4% | 23.7% |
| ABCA10        | 10349  | 32.4% | 17.4% | 21.1% | 23.7% |
| RWDD2         | 112611 | 28.9% | 22.9% | 19.1% | 23.7% |
| PPP2R2C       | 5522   | 27.8% | 20.8% | 22.4% | 23.7% |
| FBXO4         | 26272  | 39.4% | 8.1%  | 23.5% | 23.7% |
| OR10K2        | 391107 | 38.1% | 14.0% | 19.0% | 23.7% |
| MYO9B         | 4650   | 24.5% | 24.5% | 22.1% | 23.7% |
| HH114         | 84529  | 20.2% | 17.0% | 33.8% | 23.7% |
| AIPL1         | 23746  | 28.9% | 15.8% | 26.3% | 23.7% |
| AAAS          | 8086   | 24.4% | 19.2% | 27.4% | 23.7% |
| FLJ25351      | 151254 | 24.6% | 25.1% | 21.3% | 23.7% |
| LOC148898     | 148898 | 29.1% | 16.9% | 25.1% | 23.7% |
| FLJ20718      | 55027  | 23.9% | 16.8% | 30.3% | 23.7% |
| KIAA1467      | 57613  | 22.7% | 21.7% | 26.6% | 23.7% |
| FLJ38348      | 253635 | 21.5% | 14.6% | 34.9% | 23.7% |
| CFTR          | 1080   | 29.9% | 19.7% | 21.4% | 23.7% |
| AMELY         | 266    | 32.6% | 10.7% | 27.7% | 23.7% |
| COX7A1        | 1346   | 21.9% | 25.8% | 23.3% | 23.7% |
| LOC126208     | 126208 | 22.9% | 28.3% | 19.8% | 23.7% |
| FLJ25076      | 134111 | 28.9% | 18.8% | 23.3% | 23.7% |
| CHD1          | 1105   | 28.6% | 11.5% | 30.9% | 23.7% |
| KLP1          | 57106  | 20.0% | 16.4% | 34.7% | 23.7% |
| LOC130617     | 130617 | 20.9% | 21.2% | 28.9% | 23.7% |
| FBXL13        | 222235 | 28.1% | 14.8% | 28.1% | 23.7% |
| ORST2         | 219464 | 26.1% | 21.2% | 23.7% | 23.7% |
| TMPT          | 83862  | 18.1% | 22.7% | 30.3% | 23.7% |
| LOC118430     | 118430 | 27.5% | 16.3% | 27.3% | 23.7% |
| LOC51123      | 51123  | 27.7% | 10.5% | 32.9% | 23.7% |
| GGTLA4        | 92086  | 18.9% | 19.2% | 33.0% | 23.7% |
| PRNP          | 5621   | 16.1% | 27.5% | 27.5% | 23.7% |
| DSPP          | 1834   | 28.1% | 18.3% | 24.7% | 23.7% |
| CALM1         | 801    | 19.5% | 25.3% | 26.3% | 23.7% |
| CENPE         | 1062   | 22.6% | 15.4% | 33.0% | 23.7% |
| CARS          | 833    | 30.5% | 21.7% | 18.9% | 23.7% |
| RAB2          | 5862   | 31.0% | 20.5% | 19.6% | 23.7% |
| OR2T8         | 343172 | 27.9% | 19.8% | 23.4% | 23.7% |
| FBXO22        | 26263  | 24.6% | 14.7% | 31.8% | 23.7% |
| LOC163223     | 163223 | 29.9% | 9.8%  | 31.4% | 23.7% |
| CGRRF1        | 10668  | 29.2% | 11.7% | 30.1% | 23.7% |
| RP13-36C9.3   | 441519 | 27.2% | 20.7% | 23.2% | 23.7% |
| KBTBD1        | 401265 | 14.8% | 20.9% | 35.5% | 23.7% |
| DKFZP566D1346 | 81573  | 19.4% | 21.3% | 30.4% | 23.7% |
| ZNF582        | 147948 | 34.0% | 16.8% | 20.2% | 23.7% |
| HPS3          | 84343  | 23.0% | 21.5% | 26.7% | 23.7% |
| TRIT1         | 54802  | 39.1% | 17.5% | 14.5% | 23.7% |
| IL17D         | 53342  | 26.1% | 21.3% | 23.7% | 23.7% |
| UGT1A8        | 54576  | 42.9% | 10.5% | 17.7% | 23.7% |
| EXOSC5        | 56915  | 19.0% | 12.9% | 39.2% | 23.7% |
| CYP1A2        | 1544   | 36.0% | 24.0% | 11.1% | 23.7% |
| MAP3K6        | 9064   | 25.2% | 29.4% | 16.5% | 23.7% |
| MPDU1         | 9526   | 35.9% | 18.8% | 16.4% | 23.7% |
| SCD5          | 79966  | 36.3% | 17.8% | 17.1% | 23.7% |
| UNC84A        | 23353  | 22.7% | 23.8% | 24.6% | 23.7% |
| CD164L1       | 57124  | 20.9% | 18.2% | 32.0% | 23.7% |
| CILP          | 8483   | 23.1% | 31.5% | 16.4% | 23.7% |
| SGSH          | 6448   | 19.9% | 27.5% | 23.8% | 23.7% |
| DBP           | 1628   | 26.1% | 15.3% | 29.6% | 23.7% |

|               |           |       |       |       |       |
|---------------|-----------|-------|-------|-------|-------|
| MUC4          | 4585      | 31.0% | 22.0% | 18.1% | 23.7% |
| SFTPC         | 6440      | 27.4% | 14.6% | 29.1% | 23.7% |
| LAX1          | 54900     | 23.8% | 22.1% | 25.2% | 23.7% |
| S100A12       | 6283      | 38.6% | 14.6% | 17.8% | 23.7% |
| PHBX          | 5251      | 26.1% | 26.5% | 18.5% | 23.7% |
| KRTHB4        | 3890      | 15.0% | 21.3% | 34.8% | 23.7% |
| MGC16733      | 92105     | 24.9% | 23.2% | 23.1% | 23.7% |
| GNG2          | 54331     | 27.2% | 15.5% | 28.4% | 23.7% |
| ZFP161        | 7541      | 19.1% | 21.5% | 30.5% | 23.7% |
| MGC4368       | 79415     | 17.4% | 31.5% | 22.2% | 23.7% |
| TREM2         | 54209     | 19.8% | 27.1% | 24.2% | 23.7% |
| HERC3         | 8916      | 30.6% | 20.0% | 20.5% | 23.7% |
| SEMA3B        | 7869      | 30.4% | 21.6% | 19.1% | 23.7% |
| UBE2J2        | 118424    | 22.1% | 23.3% | 25.7% | 23.7% |
| CLCNKA        | 1187      | 20.5% | 27.9% | 22.7% | 23.7% |
| ASCL1         | 429       | 31.9% | 14.4% | 24.8% | 23.7% |
| ZNF317        | 57693     | 33.1% | 17.3% | 20.8% | 23.7% |
| RABAC1        | 10567     | 31.2% | 21.2% | 18.8% | 23.7% |
| EVIS          | 7813      | 24.4% | 24.7% | 22.1% | 23.7% |
| RDH12         | 145226    | 32.1% | 14.3% | 24.7% | 23.7% |
| HLA-DMB       | 3109      | 30.9% | 19.9% | 20.4% | 23.7% |
| FLJ14871      | 84940     | 14.8% | 18.3% | 38.0% | 23.7% |
| LOC138046     | 138046    | 28.2% | 16.1% | 26.8% | 23.7% |
| KIF20A        | 10112     | 21.3% | 23.2% | 26.7% | 23.7% |
| ADAMTS15      | 170689    | 33.1% | 22.3% | 15.7% | 23.7% |
| CPLX3         | 594855    | 18.5% | 26.0% | 26.7% | 23.7% |
| WDR22         | 8816      | 18.0% | 22.6% | 30.5% | 23.7% |
| YLPM1         | 56252     | 23.4% | 17.6% | 30.2% | 23.7% |
| LOC492311     | 492311    | 31.3% | 19.4% | 20.5% | 23.7% |
| NTF5          | 4909      | 22.9% | 29.6% | 18.7% | 23.7% |
| LRRC4B        | 94030     | 28.0% | 21.4% | 21.7% | 23.7% |
| ZNF452        | 114821    | 20.7% | 18.3% | 32.2% | 23.7% |
| INSL6         | 11172     | 18.1% | 28.1% | 25.0% | 23.7% |
| SKI           | 6497      | 22.6% | 15.2% | 33.3% | 23.7% |
| IGFBP1        | 3484      | 25.2% | 24.1% | 21.9% | 23.7% |
| SNX13         | 23161     | 25.6% | 28.0% | 17.6% | 23.7% |
| AQP7          | 364       | 37.6% | 10.3% | 23.2% | 23.7% |
| FLJ10408      | 55138     | 13.5% | 22.5% | 35.3% | 23.7% |
| C20ORF46      | 55321     | 23.6% | 22.3% | 25.3% | 23.7% |
| CYP2B6        | 1555      | 32.1% | 25.2% | 13.9% | 23.7% |
| FLJ38101      | 255919    | 26.6% | 10.7% | 33.8% | 23.7% |
| AMID          | 84883     | 24.0% | 23.2% | 24.0% | 23.7% |
| FAM24A        | 118670    | 22.9% | 22.3% | 25.9% | 23.7% |
| DKFZP313G1735 | 153642    | 30.4% | 14.5% | 26.3% | 23.7% |
| LOC339451     | 339451    | 21.2% | 19.0% | 31.1% | 23.7% |
| AP3S2         | 10239     | 27.0% | 25.6% | 18.6% | 23.7% |
| EI24          | 9538      | 22.9% | 29.4% | 18.9% | 23.7% |
| MRO           | 83876     | 37.2% | 17.0% | 17.0% | 23.7% |
| AKAP13        | 11214     | 28.4% | 20.6% | 22.2% | 23.7% |
| FLJ20014      | 54785     | 23.5% | 6.7%  | 41.0% | 23.7% |
| ADAMTS4       | 9507      | 26.5% | 24.3% | 20.5% | 23.7% |
| PAX3          | 5077      | 26.6% | 15.6% | 29.1% | 23.7% |
| CSORF5        | 51306     | 35.9% | 13.8% | 21.5% | 23.7% |
| ABI3          | 51225     | 28.7% | 24.5% | 18.1% | 23.7% |
| TRIM9         | 114088    | 25.6% | 27.5% | 18.2% | 23.7% |
| HECA          | 51696     | 28.8% | 19.7% | 22.7% | 23.7% |
| SP140         | 11262     | 28.8% | 21.9% | 20.6% | 23.7% |
| BCS1L         | 617       | 33.9% | 23.2% | 14.2% | 23.7% |
| C9ORF16       | 79095     | 34.1% | 13.2% | 24.0% | 23.7% |
| TBX4          | 9496      | 25.9% | 18.0% | 27.3% | 23.7% |
| LOC100127889  | 100127889 | 28.8% | 20.4% | 22.1% | 23.7% |
| STK32B        | 55351     | 22.3% | 27.7% | 21.2% | 23.7% |
| H0XB8         | 3218      | 33.9% | 14.8% | 22.6% | 23.8% |
| NPTXR         | 23467     | 30.4% | 17.2% | 23.7% | 23.8% |
| FLJ38944      | 126272    | 26.8% | 19.4% | 25.1% | 23.8% |
| KIAA0564      | 23078     | 24.8% | 24.7% | 21.8% | 23.8% |
| ARSA          | 410       | 29.3% | 23.4% | 18.6% | 23.8% |
| IDE           | 3416      | 28.5% | 26.3% | 16.5% | 23.8% |
| LIPG          | 9388      | 31.9% | 12.3% | 27.0% | 23.8% |
| POU2F1        | 5451      | 36.1% | 14.3% | 20.8% | 23.8% |
| APEX1         | 328       | 28.2% | 21.3% | 21.8% | 23.8% |
| RHOC          | 389       | 26.2% | 22.4% | 22.8% | 23.8% |
| EDG7          | 23566     | 28.8% | 20.3% | 22.2% | 23.8% |
| M6PRBP1       | 10226     | 20.7% | 27.0% | 23.6% | 23.8% |
| P4HA1         | 5033      | 24.5% | 15.6% | 31.2% | 23.8% |
| PTK9          | 5756      | 26.4% | 21.3% | 23.6% | 23.8% |
| S0X2          | 6657      | 19.6% | 29.3% | 22.4% | 23.8% |
| GANC          | 2595      | 32.9% | 17.4% | 21.0% | 23.8% |
| KAT3          | 56267     | 31.4% | 17.8% | 22.1% | 23.8% |
| NAP1L4        | 4676      | 26.4% | 20.4% | 24.4% | 23.8% |
| ADAM12        | 8038      | 31.2% | 14.8% | 25.3% | 23.8% |
| ZNF121        | 7675      | 15.7% | 23.2% | 32.3% | 23.8% |
| ADAM19        | 8728      | 29.5% | 15.2% | 26.5% | 23.8% |
| RIPK1         | 8737      | 25.1% | 19.2% | 27.0% | 23.8% |
| FLJ32743      | 220136    | 15.2% | 16.6% | 39.5% | 23.8% |
| C4ORF6        | 10141     | 28.2% | 24.6% | 18.5% | 23.8% |
| FLJ21511      | 80157     | 20.3% | 28.0% | 23.1% | 23.8% |
| EED           | 8726      | 40.0% | 10.4% | 20.9% | 23.8% |
| KIAA1033      | 23325     | 39.3% | 19.2% | 12.8% | 23.8% |
| ZNF502        | 91392     | 33.9% | 16.6% | 20.8% | 23.8% |
| SLC35C1       | 55343     | 28.8% | 19.6% | 22.9% | 23.8% |
| A2M           | 2         | 24.4% | 27.1% | 19.8% | 23.8% |
| KIAA1914      | 84632     | 34.4% | 21.7% | 15.2% | 23.8% |
| HTR3D         | 200909    | 27.8% | 15.5% | 28.1% | 23.8% |
| GPX2          | 2877      | 40.2% | 12.2% | 18.9% | 23.8% |
| SEMA6D        | 80031     | 31.1% | 18.7% | 21.5% | 23.8% |
| AXIN1         | 8312      | 35.1% | 24.6% | 11.6% | 23.8% |
| UNC5CL        | 222643    | 31.4% | 10.7% | 29.3% | 23.8% |

|               |        |       |       |       |       |
|---------------|--------|-------|-------|-------|-------|
| ZBTB5         | 9925   | 34.0% | 23.8% | 13.5% | 23.8% |
| OAS3          | 4940   | 29.5% | 13.8% | 28.1% | 23.8% |
| SORCS1        | 114815 | 31.8% | 21.4% | 18.1% | 23.8% |
| MCART1        | 92014  | 34.6% | 17.4% | 19.4% | 23.8% |
| JMJ2D         | 55693  | 33.4% | 20.2% | 17.7% | 23.8% |
| ZNF510        | 22869  | 26.4% | 26.2% | 18.8% | 23.8% |
| ACHE          | 43     | 24.8% | 22.2% | 24.3% | 23.8% |
| MGC15668      | 84842  | 14.5% | 17.7% | 39.1% | 23.8% |
| TAAR2         | 9287   | 21.2% | 24.3% | 25.8% | 23.8% |
| FLJ31340      | 222223 | 17.1% | 17.8% | 36.5% | 23.8% |
| GNLY          | 10578  | 14.6% | 26.9% | 29.8% | 23.8% |
| GPD1          | 2819   | 25.5% | 27.2% | 18.6% | 23.8% |
| FLJ13213      | 79811  | 22.5% | 14.9% | 34.0% | 23.8% |
| GJA3          | 2700   | 20.6% | 26.7% | 24.1% | 23.8% |
| TRA16         | 126382 | 28.9% | 27.6% | 14.8% | 23.8% |
| ITGAE         | 3682   | 40.2% | 6.2%  | 24.9% | 23.8% |
| GNPTAG        | 84572  | 25.0% | 21.2% | 25.2% | 23.8% |
| PITPNM1       | 9600   | 34.8% | 17.8% | 18.8% | 23.8% |
| SPAG5         | 10615  | 16.3% | 31.4% | 23.6% | 23.8% |
| C9ORF77       | 51104  | 19.3% | 23.6% | 28.5% | 23.8% |
| MTCP1         | 4515   | 24.9% | 25.2% | 21.3% | 23.8% |
| HSD11B2       | 3291   | 20.9% | 24.4% | 26.0% | 23.8% |
| TCEAL1        | 9338   | 30.4% | 12.1% | 28.9% | 23.8% |
| GPR10         | 2834   | 27.1% | 22.4% | 21.9% | 23.8% |
| WNT3          | 7473   | 34.9% | 25.0% | 11.5% | 23.8% |
| SOX17         | 64321  | 30.9% | 18.1% | 22.4% | 23.8% |
| AQP4          | 361    | 25.7% | 24.3% | 21.4% | 23.8% |
| CD74          | 972    | 26.3% | 14.0% | 31.1% | 23.8% |
| IFNAR1        | 3454   | 37.9% | 13.1% | 20.4% | 23.8% |
| CSEN          | 30818  | 29.2% | 17.4% | 24.7% | 23.8% |
| IFNA5         | 3442   | 22.6% | 17.7% | 31.1% | 23.8% |
| FLJ10853      | 55246  | 20.4% | 15.8% | 35.2% | 23.8% |
| LOC387911     | 387911 | 29.7% | 15.9% | 25.8% | 23.8% |
| FLJ38159      | 220388 | 15.0% | 24.7% | 31.6% | 23.8% |
| FLJ12584      | 80210  | 20.0% | 24.8% | 26.6% | 23.8% |
| ZIC2          | 7546   | 29.1% | 16.7% | 25.6% | 23.8% |
| DKFZP434J0113 | 84070  | 22.9% | 26.5% | 22.1% | 23.8% |
| ARHGAP12      | 94134  | 34.3% | 12.1% | 25.0% | 23.8% |
| UFC1          | 51506  | 33.9% | 14.4% | 23.1% | 23.8% |
| G1P2          | 9636   | 16.0% | 19.0% | 36.4% | 23.8% |
| SWS1          | 125150 | 23.9% | 7.7%  | 39.9% | 23.8% |
| SLC3A1        | 6519   | 25.2% | 10.4% | 35.8% | 23.8% |
| CSNK1G3       | 1456   | 25.5% | 22.0% | 24.0% | 23.8% |
| ANKRD32       | 84250  | 19.5% | 28.2% | 23.7% | 23.8% |
| PAFAH2        | 5051   | 31.7% | 8.0%  | 31.7% | 23.8% |
| CGB           | 1082   | 33.3% | 22.9% | 15.2% | 23.8% |
| FLJ22471      | 80212  | 19.3% | 20.8% | 31.3% | 23.8% |
| TK2           | 7084   | 21.2% | 27.3% | 22.9% | 23.8% |
| LOC441282     | 441282 | 22.0% | 11.8% | 37.6% | 23.8% |
| LOC346673     | 346673 | 23.7% | 12.0% | 35.8% | 23.8% |
| RCBTB1        | 55213  | 30.9% | 17.8% | 22.7% | 23.8% |
| CGI-51        | 25813  | 13.1% | 24.7% | 33.6% | 23.8% |
| CBWD3         | 445571 | 27.9% | 22.5% | 21.1% | 23.8% |
| MRPS31        | 10240  | 31.6% | 17.0% | 22.8% | 23.8% |
| FLJ14451      | 84872  | 16.2% | 16.1% | 39.2% | 23.8% |
| FLJ20321      | 54897  | 21.2% | 15.6% | 34.6% | 23.8% |
| MGC61716      | 130916 | 17.2% | 27.3% | 27.0% | 23.8% |
| ZFPM2         | 23414  | 28.1% | 20.7% | 22.6% | 23.8% |
| PTP4A2        | 8073   | 28.8% | 27.9% | 14.8% | 23.8% |
| ADPRH         | 141    | 41.8% | 19.2% | 10.4% | 23.8% |
| MRPL38        | 64978  | 22.8% | 18.7% | 30.0% | 23.8% |
| NEU4          | 129807 | 29.9% | 17.9% | 23.6% | 23.8% |
| TP73          | 7161   | 22.5% | 21.5% | 27.5% | 23.8% |
| LYPLA1        | 10434  | 25.2% | 26.2% | 20.0% | 23.8% |
| AP4B1         | 10717  | 33.6% | 15.0% | 22.9% | 23.8% |
| ZDHHC2        | 51201  | 26.9% | 26.9% | 17.6% | 23.8% |
| RABGGTB       | 5876   | 30.6% | 17.5% | 23.3% | 23.8% |
| MS4A5         | 64232  | 22.8% | 25.0% | 23.7% | 23.8% |
| KDELR3        | 11015  | 27.7% | 19.8% | 24.0% | 23.8% |
| ILF2          | 3608   | 24.0% | 23.2% | 24.3% | 23.8% |
| STXBP6        | 29091  | 28.4% | 16.5% | 26.5% | 23.8% |
| ORSAC2        | 81050  | 26.9% | 18.5% | 26.1% | 23.8% |
| APOC3         | 345    | 27.0% | 23.9% | 20.6% | 23.8% |
| ZNF38         | 7589   | 26.7% | 20.9% | 24.0% | 23.8% |
| PKLR          | 5313   | 16.0% | 34.1% | 21.4% | 23.8% |
| ANKRD24       | 170961 | 26.7% | 25.6% | 19.3% | 23.8% |
| ROBO2         | 6092   | 29.1% | 23.1% | 19.3% | 23.8% |
| ZSWIM4        | 65249  | 14.3% | 29.3% | 27.9% | 23.8% |
| DMC1          | 11144  | 19.1% | 19.7% | 32.7% | 23.8% |
| RCL1          | 10171  | 28.0% | 16.6% | 26.8% | 23.8% |
| DOCK3         | 1795   | 27.7% | 25.8% | 18.0% | 23.8% |
| LOC284207     | 284207 | 19.0% | 25.5% | 27.0% | 23.8% |
| TOMM22        | 56993  | 29.7% | 21.1% | 20.7% | 23.8% |
| PPIL4         | 85313  | 35.4% | 10.8% | 25.4% | 23.8% |
| COL18A1       | 80781  | 26.6% | 28.6% | 16.4% | 23.8% |
| NNMT          | 4837   | 20.0% | 20.9% | 30.6% | 23.8% |
| ZNF101        | 94039  | 27.5% | 23.6% | 20.5% | 23.8% |
| MTHFD2        | 10797  | 22.4% | 23.9% | 25.2% | 23.8% |
| NME6          | 10201  | 25.8% | 25.6% | 20.1% | 23.8% |
| CDKN3         | 1033   | 18.9% | 25.8% | 26.9% | 23.8% |
| FLJ11004      | 55282  | 19.3% | 21.7% | 30.5% | 23.8% |
| HPCA          | 3208   | 27.1% | 20.2% | 24.2% | 23.8% |
| HBZ           | 3050   | 38.7% | 13.7% | 19.1% | 23.8% |
| PHEMX         | 10077  | 13.4% | 14.3% | 43.9% | 23.8% |
| PGPEP1        | 54858  | 25.4% | 20.4% | 25.7% | 23.8% |
| HSFY2         | 159119 | 16.4% | 19.8% | 35.3% | 23.8% |
| KRT25C        | 342574 | 28.5% | 13.6% | 29.5% | 23.8% |
| CDC42BPA      | 8476   | 25.7% | 16.7% | 29.2% | 23.8% |

|              |        |       |       |       |       |
|--------------|--------|-------|-------|-------|-------|
| MGC16372     | 92749  | 19.2% | 14.0% | 38.3% | 23.8% |
| MGC11256     | 79174  | 24.1% | 21.1% | 26.3% | 23.9% |
| PLD1         | 5337   | 25.9% | 15.5% | 30.1% | 23.9% |
| ALG8         | 79053  | 38.1% | 11.8% | 21.7% | 23.9% |
| CREB3L4      | 148327 | 35.5% | 25.0% | 11.1% | 23.9% |
| ZNF434       | 54925  | 26.6% | 22.6% | 22.3% | 23.9% |
| MPHOSPH6     | 10200  | 27.3% | 39.3% | 5.0%  | 23.9% |
| GNRH2        | 2797   | 17.4% | 34.3% | 19.9% | 23.9% |
| WISP1        | 8840   | 30.4% | 20.7% | 20.5% | 23.9% |
| PCDHGB3      | 56102  | 25.3% | 18.5% | 27.7% | 23.9% |
| MCM7         | 4176   | 29.4% | 14.5% | 27.6% | 23.9% |
| PURA         | 5813   | 32.8% | 18.4% | 20.4% | 23.9% |
| C14ORF104    | 55172  | 23.9% | 24.4% | 23.3% | 23.9% |
| LOC51234     | 51234  | 27.6% | 14.1% | 29.9% | 23.9% |
| CDKN2B       | 1030   | 22.1% | 32.0% | 17.5% | 23.9% |
| MTVR1        | 23625  | 27.5% | 15.1% | 29.0% | 23.9% |
| JAG1         | 182    | 22.1% | 24.7% | 24.7% | 23.9% |
| NUDT3        | 11165  | 36.5% | 23.4% | 11.7% | 23.9% |
| HSPC171      | 29100  | 28.0% | 25.5% | 18.1% | 23.9% |
| ATG10        | 83734  | 32.9% | 15.6% | 23.2% | 23.9% |
| STX19        | 415117 | 29.6% | 22.7% | 19.3% | 23.9% |
| HIST1H4B     | 8366   | 34.6% | 15.3% | 21.7% | 23.9% |
| FOXP3        | 50943  | 25.5% | 16.1% | 30.0% | 23.9% |
| SUV39H1      | 6839   | 34.1% | 11.9% | 25.6% | 23.9% |
| POU3F4       | 5456   | 9.5%  | 41.7% | 20.4% | 23.9% |
| KIRREL       | 55243  | 23.8% | 23.1% | 24.7% | 23.9% |
| PEL1         | 57162  | 40.8% | 11.1% | 19.7% | 23.9% |
| FLJ38451     | 126375 | 23.1% | 23.5% | 25.0% | 23.9% |
| STEAP4       | 79689  | 12.3% | 29.7% | 29.7% | 23.9% |
| ST14         | 6768   | 27.1% | 18.3% | 26.2% | 23.9% |
| PSK-1        | 26470  | 23.2% | 20.1% | 28.3% | 23.9% |
| SLC25A35     | 399512 | 9.7%  | 31.2% | 30.7% | 23.9% |
| BARX2        | 8538   | 25.5% | 21.2% | 24.9% | 23.9% |
| GTF2I        | 2969   | 33.0% | 18.2% | 20.5% | 23.9% |
| N4BP1        | 9683   | 19.8% | 25.3% | 26.5% | 23.9% |
| FBXO16       | 157574 | 29.1% | 20.0% | 22.5% | 23.9% |
| TCEB3B       | 51224  | 35.3% | 10.8% | 25.5% | 23.9% |
| PSCD2        | 9266   | 30.0% | 20.1% | 21.6% | 23.9% |
| LOC441476    | 441476 | 26.7% | 22.4% | 22.5% | 23.9% |
| FAM3B        | 54097  | 26.1% | 25.2% | 20.4% | 23.9% |
| STATH        | 6779   | 27.7% | 15.9% | 28.0% | 23.9% |
| SYNE2        | 23224  | 34.1% | 20.4% | 17.1% | 23.9% |
| CHRND        | 1144   | 22.6% | 22.6% | 26.4% | 23.9% |
| GPR37        | 2861   | 26.4% | 20.8% | 24.4% | 23.9% |
| FLOT2        | 2319   | 36.7% | 12.1% | 22.8% | 23.9% |
| CCL16        | 6360   | 27.7% | 22.9% | 21.1% | 23.9% |
| LGR6         | 59352  | 24.6% | 22.5% | 24.6% | 23.9% |
| CDO1         | 1036   | 34.8% | 11.1% | 25.8% | 23.9% |
| SMC5L1       | 23137  | 20.4% | 23.2% | 28.1% | 23.9% |
| ZBED4        | 9889   | 36.3% | 19.5% | 15.9% | 23.9% |
| LOC388403    | 388403 | 24.1% | 15.0% | 32.6% | 23.9% |
| CTAG3        | 285782 | 28.1% | 15.4% | 28.1% | 23.9% |
| LOC129881    | 129881 | 38.3% | 21.0% | 12.4% | 23.9% |
| BEXL1        | 56271  | 32.4% | 19.9% | 19.4% | 23.9% |
| PPP3CC       | 5533   | 23.6% | 31.6% | 16.5% | 23.9% |
| NCAM1        | 4684   | 21.6% | 27.3% | 22.7% | 23.9% |
| SEC24A       | 10802  | 32.7% | 21.2% | 17.8% | 23.9% |
| OR4F15       | 390649 | 26.0% | 21.2% | 24.5% | 23.9% |
| Clorf164     | 55182  | 35.4% | 16.1% | 20.2% | 23.9% |
| TEAD4        | 7004   | 36.5% | 16.2% | 19.0% | 23.9% |
| MAL2         | 114569 | 29.1% | 17.8% | 24.8% | 23.9% |
| RP13-15M17.2 | 199953 | 26.1% | 24.6% | 21.0% | 23.9% |
| TNFRSF19L    | 84957  | 35.4% | 14.4% | 22.0% | 23.9% |
| THRAP5       | 10025  | 37.4% | 14.3% | 20.0% | 23.9% |
| C9ORF36      | 26165  | 20.2% | 19.1% | 32.4% | 23.9% |
| ACAT1        | 38     | 33.7% | 20.5% | 17.4% | 23.9% |
| BNC1         | 646    | 31.4% | 20.0% | 20.2% | 23.9% |
| CORO1B       | 57175  | 23.1% | 23.1% | 25.5% | 23.9% |
| HIST1H4L     | 8368   | 17.3% | 28.6% | 25.8% | 23.9% |
| SLC5A5       | 6528   | 23.5% | 22.3% | 25.9% | 23.9% |
| TROAP        | 10024  | 22.4% | 23.2% | 26.2% | 23.9% |
| LOC389813    | 389813 | 32.0% | 20.6% | 19.1% | 23.9% |
| TPCN2        | 219931 | 18.6% | 19.1% | 33.9% | 23.9% |
| VEGFC        | 7424   | 15.7% | 28.3% | 27.7% | 23.9% |
| ROR1         | 4919   | 18.7% | 31.9% | 21.1% | 23.9% |
| CHFR         | 55743  | 27.0% | 17.9% | 26.8% | 23.9% |
| SLC12A1      | 6557   | 28.6% | 20.4% | 22.7% | 23.9% |
| ZMYND12      | 84217  | 31.1% | 21.3% | 19.4% | 23.9% |
| ACAD8        | 27034  | 20.5% | 18.0% | 33.2% | 23.9% |
| ADPRHL1      | 113622 | 12.6% | 24.7% | 34.5% | 23.9% |
| DUSP19       | 142679 | 22.4% | 31.0% | 18.3% | 23.9% |
| RNF149       | 284996 | 25.2% | 23.0% | 23.5% | 23.9% |
| ALDH8A1      | 64577  | 32.9% | 17.1% | 21.8% | 23.9% |
| PPP1R14C     | 81706  | 30.8% | 24.2% | 16.7% | 23.9% |
| MGC23947     | 56849  | 25.6% | 18.7% | 27.4% | 23.9% |
| LOC204474    | 204474 | 21.4% | 17.6% | 32.7% | 23.9% |
| FAM14B       | 122509 | 23.1% | 22.0% | 26.7% | 23.9% |
| C9ORF60      | 10444  | 19.5% | 15.2% | 37.1% | 23.9% |
| OR5AU1       | 390445 | 33.6% | 16.9% | 21.3% | 23.9% |
| PGK1         | 5230   | 22.7% | 22.5% | 26.6% | 23.9% |
| TNFSF10      | 8743   | 34.3% | 8.6%  | 28.9% | 23.9% |
| CSorf18      | 7905   | 21.7% | 21.6% | 28.4% | 23.9% |
| FKSG87       | 83953  | 19.3% | 15.0% | 37.5% | 23.9% |
| AIM1L        | 55057  | 15.0% | 22.7% | 34.1% | 23.9% |
| TMPRSS2      | 7113   | 27.6% | 19.5% | 24.7% | 23.9% |
| CDW92        | 23446  | 28.9% | 22.1% | 20.7% | 23.9% |
| RAD51L1      | 5890   | 24.4% | 31.0% | 16.3% | 23.9% |
| COP53        | 8533   | 32.5% | 22.6% | 16.6% | 23.9% |



|               |        |       |       |       |       |
|---------------|--------|-------|-------|-------|-------|
| IL2RA         | 3559   | 27.2% | 23.9% | 20.7% | 23.9% |
| CHRNA4        | 1137   | 32.2% | 14.5% | 25.1% | 23.9% |
| RNMT          | 8731   | 21.8% | 20.8% | 29.2% | 23.9% |
| TULP2         | 7288   | 29.0% | 10.6% | 32.2% | 23.9% |
| SECISBP2      | 79048  | 20.9% | 24.6% | 26.3% | 23.9% |
| FLJ32549      | 144577 | 17.1% | 20.4% | 34.4% | 23.9% |
| LAG3          | 3902   | 27.5% | 16.3% | 28.1% | 23.9% |
| KIAA0674      | 23307  | 28.3% | 17.6% | 25.9% | 23.9% |
| EIF2C3        | 192669 | 38.1% | 8.5%  | 25.2% | 23.9% |
| MORG1         | 84292  | 37.3% | 19.6% | 14.9% | 23.9% |
| C14ORF8       | 122664 | 17.6% | 20.5% | 33.7% | 23.9% |
| C20ORF17      | 128553 | 15.4% | 12.3% | 44.1% | 23.9% |
| ABLIM1        | 3983   | 25.0% | 23.4% | 23.4% | 23.9% |
| OR5D18        | 219438 | 23.1% | 21.8% | 26.9% | 23.9% |
| ASB8          | 140461 | 24.6% | 24.2% | 23.0% | 23.9% |
| FTHL17        | 53940  | 37.9% | 18.9% | 15.0% | 23.9% |
| C18ORF17      | 125488 | 35.1% | 18.3% | 18.4% | 23.9% |
| ARPC2         | 10109  | 28.6% | 15.1% | 28.1% | 23.9% |
| C16ORF5       | 29965  | 25.7% | 22.2% | 23.9% | 23.9% |
| CCL22         | 6367   | 26.8% | 23.4% | 21.6% | 23.9% |
| C14ORF166     | 51637  | 30.8% | 22.4% | 18.7% | 23.9% |
| ANKRD6        | 22881  | 33.3% | 15.4% | 23.2% | 23.9% |
| C19ORF28      | 126321 | 22.4% | 17.8% | 31.7% | 23.9% |
| C10ORF78      | 119392 | 25.0% | 21.4% | 25.4% | 23.9% |
| ADAMTS2       | 9509   | 29.5% | 19.4% | 23.0% | 23.9% |
| OR2Y1         | 134083 | 17.7% | 27.3% | 26.9% | 23.9% |
| FLJ32440      | 286053 | 31.7% | 9.2%  | 31.0% | 23.9% |
| CCDC2         | 80173  | 21.8% | 18.9% | 31.1% | 24.0% |
| MGC21675      | 92070  | 24.8% | 11.7% | 35.3% | 24.0% |
| C11ORF11      | 747    | 18.3% | 23.5% | 30.0% | 24.0% |
| LIMS3         | 96626  | 36.1% | 21.1% | 14.7% | 24.0% |
| VEST1         | 116328 | 26.2% | 21.4% | 24.3% | 24.0% |
| UNQ338        | 646962 | 29.7% | 17.0% | 25.2% | 24.0% |
| SGEF          | 26084  | 34.5% | 19.8% | 17.6% | 24.0% |
| NALP12        | 91662  | 30.8% | 18.0% | 23.1% | 24.0% |
| PCDHA5        | 56143  | 29.2% | 22.5% | 20.2% | 24.0% |
| RAB34         | 83871  | 24.3% | 19.0% | 28.5% | 24.0% |
| DLX6          | 1750   | 30.4% | 17.2% | 24.2% | 24.0% |
| INSIG2        | 51141  | 18.9% | 30.6% | 22.4% | 24.0% |
| C6ORF113      | 221302 | 37.8% | 15.3% | 18.9% | 24.0% |
| CORIN         | 10699  | 28.4% | 23.4% | 20.1% | 24.0% |
| CENTD3        | 64411  | 8.0%  | 27.2% | 36.7% | 24.0% |
| XLKD1         | 10894  | 23.7% | 16.3% | 31.9% | 24.0% |
| TP53I3        | 9540   | 28.7% | 13.8% | 29.4% | 24.0% |
| FLJ42117      | 200844 | 30.7% | 17.5% | 23.7% | 24.0% |
| LOC646603     | 646603 | 24.8% | 21.1% | 26.0% | 24.0% |
| SRA1          | 10011  | 17.1% | 23.8% | 31.0% | 24.0% |
| SDHD          | 6392   | 37.7% | 14.4% | 19.8% | 24.0% |
| FBXL11        | 22992  | 27.2% | 25.2% | 19.5% | 24.0% |
| HCS1          | 10870  | 27.7% | 23.3% | 20.9% | 24.0% |
| GT2H2         | 2966   | 22.0% | 25.6% | 24.3% | 24.0% |
| C20ORF7       | 79133  | 29.0% | 16.6% | 26.3% | 24.0% |
| TNFSF9        | 8744   | 28.0% | 19.5% | 24.4% | 24.0% |
| 7A5           | 346389 | 26.9% | 20.6% | 24.4% | 24.0% |
| ST13          | 6767   | 18.0% | 27.9% | 26.0% | 24.0% |
| STOML1        | 9399   | 22.1% | 24.4% | 25.4% | 24.0% |
| NIF3L1        | 60491  | 30.0% | 12.5% | 29.5% | 24.0% |
| WDR18         | 57418  | 28.9% | 21.8% | 21.2% | 24.0% |
| POU4F2        | 5458   | 39.7% | 17.6% | 14.6% | 24.0% |
| KBTBD4        | 55709  | 26.2% | 17.8% | 28.0% | 24.0% |
| TRIM63        | 84676  | 26.2% | 19.7% | 26.0% | 24.0% |
| C3ORF1        | 51300  | 21.2% | 23.1% | 27.6% | 24.0% |
| LOC202134     | 202134 | 18.4% | 25.7% | 27.8% | 24.0% |
| RANBP6        | 26953  | 30.3% | 19.8% | 21.9% | 24.0% |
| C20ORF141     | 128653 | 21.4% | 21.9% | 28.7% | 24.0% |
| CFHL5         | 81494  | 20.5% | 12.7% | 38.7% | 24.0% |
| COMMD1        | 150684 | 24.1% | 23.7% | 24.1% | 24.0% |
| MGC20410      | 116071 | 24.3% | 8.6%  | 39.1% | 24.0% |
| NCOA4         | 8031   | 18.1% | 24.3% | 29.5% | 24.0% |
| LOC114926     | 114926 | 19.9% | 25.3% | 26.8% | 24.0% |
| SAC           | 55811  | 23.7% | 12.4% | 35.8% | 24.0% |
| PRPH          | 5630   | 23.0% | 28.9% | 20.1% | 24.0% |
| LSAMP         | 4045   | 28.6% | 20.3% | 23.0% | 24.0% |
| IMMT          | 10989  | 25.3% | 23.3% | 23.4% | 24.0% |
| FLJ41287      | 388121 | 19.4% | 17.1% | 35.5% | 24.0% |
| PDCD10        | 11235  | 38.5% | 12.2% | 21.3% | 24.0% |
| TCP10L        | 140290 | 24.5% | 16.5% | 31.0% | 24.0% |
| SRPRB         | 58477  | 24.7% | 24.3% | 23.0% | 24.0% |
| ZNF611        | 81856  | 26.7% | 24.8% | 20.5% | 24.0% |
| CA11          | 770    | 22.5% | 17.8% | 31.6% | 24.0% |
| C10ORF28      | 27291  | 5.6%  | 24.0% | 42.4% | 24.0% |
| HELZ          | 9931   | 21.6% | 19.7% | 30.7% | 24.0% |
| PRAMEF9       | 343070 | 21.7% | 22.7% | 27.6% | 24.0% |
| HLA-DQB1      | 3119   | 32.3% | 17.1% | 22.6% | 24.0% |
| DKFZP761B0514 | 84249  | 25.3% | 20.3% | 26.4% | 24.0% |
| DNAJA3        | 9093   | 30.4% | 23.3% | 18.3% | 24.0% |
| MTP           | 4547   | 24.6% | 25.7% | 21.8% | 24.0% |
| SCML4         | 256380 | 32.9% | 21.0% | 18.2% | 24.0% |
| WNT9A         | 7483   | 32.7% | 19.2% | 20.1% | 24.0% |
| SLC35D2       | 11046  | 29.3% | 15.9% | 26.7% | 24.0% |
| FLJ20255      | 54868  | 27.8% | 20.6% | 23.5% | 24.0% |
| RBL2          | 5934   | 30.8% | 19.6% | 21.6% | 24.0% |
| C9ORF68       | 55064  | 34.0% | 20.1% | 17.9% | 24.0% |
| C6orf26       | 401251 | 32.4% | 19.8% | 19.9% | 24.0% |
| FLJ44216      | 375484 | 20.2% | 23.1% | 28.8% | 24.0% |
| KRT6L         | 338785 | 27.3% | 30.0% | 14.7% | 24.0% |
| DGKK          | 139189 | 24.1% | 23.7% | 24.2% | 24.0% |
| HN1           | 51155  | 27.6% | 21.9% | 22.5% | 24.0% |

|              |           |       |       |       |       |
|--------------|-----------|-------|-------|-------|-------|
| C6ORF65      | 221336    | 32.1% | 28.8% | 11.1% | 24.0% |
| PHACS        | 84680     | 31.9% | 15.0% | 25.2% | 24.0% |
| LOC100134257 | 100134257 | 29.0% | 24.6% | 18.5% | 24.0% |
| GMFG         | 9535      | 26.4% | 23.2% | 22.5% | 24.0% |
| NDUFS2       | 4720      | 19.4% | 21.6% | 31.0% | 24.0% |
| PREP         | 5550      | 32.0% | 19.3% | 20.8% | 24.0% |
| MAGEA6       | 4105      | 24.1% | 23.4% | 24.6% | 24.0% |
| MGC35274     | 256586    | 25.4% | 20.4% | 26.2% | 24.0% |
| CAPN12       | 147968    | 40.0% | 15.0% | 17.0% | 24.0% |
| FLJ35681     | 283897    | 24.0% | 20.2% | 27.8% | 24.0% |
| EPB49        | 2039      | 17.2% | 28.5% | 26.4% | 24.0% |
| FJX1         | 24147     | 22.6% | 12.1% | 37.4% | 24.0% |
| TRMT1        | 55687     | 35.0% | 12.5% | 24.6% | 24.0% |
| FLJ12770     | 84134     | 24.9% | 11.8% | 35.4% | 24.0% |
| CNOT8        | 9337      | 28.4% | 20.4% | 23.3% | 24.0% |
| PASK         | 23178     | 22.1% | 27.8% | 22.2% | 24.0% |
| EPB41L3      | 23136     | 27.3% | 13.4% | 31.4% | 24.0% |
| CD2          | 914       | 30.6% | 25.1% | 16.4% | 24.0% |
| CYP1A1       | 1543      | 27.4% | 23.4% | 21.3% | 24.0% |
| NEK5         | 341676    | 26.8% | 23.4% | 21.9% | 24.0% |
| JMJD5        | 79831     | 19.8% | 25.3% | 27.1% | 24.0% |
| AGPAT4       | 56895     | 31.0% | 11.4% | 29.7% | 24.0% |
| EAP30        | 11267     | 16.0% | 24.1% | 31.9% | 24.0% |
| LOC51668     | 51668     | 25.0% | 11.1% | 36.0% | 24.0% |
| ADSL         | 158       | 31.9% | 21.4% | 18.8% | 24.0% |
| MAB21L2      | 10586     | 39.0% | 9.8%  | 23.3% | 24.0% |
| C9ORF13      | 79987     | 26.8% | 13.0% | 32.3% | 24.0% |
| CD6          | 923       | 30.2% | 29.0% | 12.9% | 24.0% |
| ZHX2         | 22882     | 38.0% | 13.6% | 20.6% | 24.0% |
| C9ORF76      | 80010     | 19.9% | 16.7% | 35.5% | 24.0% |
| PTGDS        | 5730      | 28.4% | 24.3% | 19.4% | 24.0% |
| XRCC2        | 7516      | 28.2% | 20.6% | 23.3% | 24.0% |
| GGT2         | 728441    | 22.7% | 19.5% | 29.9% | 24.0% |
| LOC388323    | 388323    | 29.2% | 0.0%  | 43.0% | 24.0% |
| STAG3        | 10734     | 19.7% | 24.5% | 28.0% | 24.0% |
| LOC497190    | 497190    | 28.3% | 21.3% | 22.5% | 24.0% |
| LOC348094    | 348094    | 19.7% | 21.6% | 30.9% | 24.0% |
| PRDX3        | 10935     | 25.0% | 17.9% | 29.2% | 24.0% |
| HERPUD1      | 9709      | 34.5% | 17.2% | 20.4% | 24.0% |
| NP220        | 27332     | 21.5% | 21.8% | 28.8% | 24.0% |
| SLCO4A1      | 28231     | 19.1% | 27.7% | 25.4% | 24.0% |
| SLC25A34     | 284723    | 20.5% | 13.3% | 38.4% | 24.0% |
| C9ORF3       | 84909     | 27.8% | 23.5% | 20.9% | 24.0% |
| MAGEB6       | 158809    | 32.7% | 19.8% | 19.6% | 24.1% |
| ALLC         | 55821     | 31.8% | 15.7% | 24.7% | 24.1% |
| ASF1A        | 25842     | 23.9% | 20.6% | 27.6% | 24.1% |
| ACN9         | 57001     | 38.4% | 14.5% | 19.3% | 24.1% |
| MGC34132     | 285203    | 22.6% | 16.9% | 32.6% | 24.1% |
| FLJ12363     | 84127     | 21.4% | 28.9% | 21.8% | 24.1% |
| SRDS5A1      | 6715      | 17.8% | 27.0% | 27.3% | 24.1% |
| SENP3        | 26168     | 26.4% | 28.2% | 17.6% | 24.1% |
| C20ORF14     | 24148     | 10.8% | 25.6% | 35.7% | 24.1% |
| THRB         | 7068      | 27.7% | 26.4% | 18.1% | 24.1% |
| UGT2A1       | 10941     | 32.4% | 11.1% | 28.6% | 24.1% |
| KIAA1811     | 84446     | 25.6% | 21.8% | 24.8% | 24.1% |
| DEFB121      | 245934    | 32.3% | 24.5% | 15.4% | 24.1% |
| AMOTL1       | 154810    | 38.1% | 14.1% | 19.9% | 24.1% |
| ABI3BP       | 25890     | 32.8% | 22.3% | 17.0% | 24.1% |
| SLC7A3       | 84889     | 40.8% | 9.6%  | 21.8% | 24.1% |
| RGC32        | 28984     | 31.5% | 9.7%  | 31.0% | 24.1% |
| TRIM14       | 9830      | 30.4% | 18.5% | 23.3% | 24.1% |
| MLH1         | 4292      | 38.2% | 15.8% | 18.1% | 24.1% |
| PRSS23       | 11098     | 27.2% | 31.8% | 13.1% | 24.1% |
| LRRC19       | 64922     | 21.9% | 25.1% | 25.2% | 24.1% |
| ZNF403       | 79893     | 26.8% | 17.9% | 27.4% | 24.1% |
| CD4          | 920       | 25.2% | 24.1% | 23.0% | 24.1% |
| B3GALT4      | 8705      | 33.9% | 10.8% | 27.6% | 24.1% |
| CAPN13       | 92291     | 25.9% | 21.0% | 25.3% | 24.1% |
| TRH          | 7200      | 30.8% | 19.0% | 22.4% | 24.1% |
| DHRS2        | 10202     | 24.2% | 27.0% | 20.9% | 24.1% |
| GLRX2        | 51022     | 27.0% | 23.3% | 21.9% | 24.1% |
| MAPK7        | 5598      | 24.6% | 18.7% | 28.9% | 24.1% |
| PPP2CA       | 5515      | 27.5% | 27.2% | 17.6% | 24.1% |
| DHH          | 50846     | 30.5% | 30.0% | 11.7% | 24.1% |
| FLJ33084     | 149483    | 25.5% | 13.2% | 33.6% | 24.1% |
| MGC9084      | 92342     | 24.8% | 17.4% | 30.0% | 24.1% |
| CT45-4       | 441520    | 29.5% | 17.3% | 25.5% | 24.1% |
| CSMD1        | 64478     | 29.9% | 19.7% | 22.7% | 24.1% |
| ZMYND15      | 84225     | 28.4% | 23.9% | 19.9% | 24.1% |
| CIT          | 11113     | 20.3% | 25.8% | 26.2% | 24.1% |
| LOC129138    | 129138    | 36.4% | 15.4% | 20.5% | 24.1% |
| TRPC7        | 57113     | 28.8% | 26.4% | 17.0% | 24.1% |
| GRM1         | 2911      | 25.5% | 18.3% | 28.4% | 24.1% |
| ARHGFE5      | 7984      | 36.5% | 10.3% | 25.5% | 24.1% |
| LOC401067    | 401067    | 21.7% | 15.6% | 34.9% | 24.1% |
| FLJ10460     | 55142     | 31.3% | 9.3%  | 31.8% | 24.1% |
| GPR26        | 2849      | 28.2% | 20.7% | 23.4% | 24.1% |
| SERPINB7     | 8710      | 29.1% | 21.4% | 21.8% | 24.1% |
| TRIM55       | 84675     | 27.7% | 18.2% | 26.4% | 24.1% |
| SMURF1       | 57154     | 32.4% | 18.8% | 21.1% | 24.1% |
| FURIN        | 5045      | 27.7% | 20.5% | 24.1% | 24.1% |
| ATP6VOE      | 8992      | 26.2% | 25.1% | 21.0% | 24.1% |
| EID2         | 163126    | 25.8% | 21.4% | 25.1% | 24.1% |
| HUMPPA       | 30850     | 21.8% | 25.0% | 25.5% | 24.1% |
| SURF2        | 6835      | 26.9% | 24.8% | 20.6% | 24.1% |
| PARN         | 5073      | 23.4% | 24.5% | 24.4% | 24.1% |
| TBC1D8       | 11138     | 23.8% | 19.7% | 28.8% | 24.1% |
| FLJ20626     | 55663     | 34.2% | 22.3% | 15.8% | 24.1% |

|              |        |       |       |       |       |
|--------------|--------|-------|-------|-------|-------|
| FLJ25692     | 157777 | 28.5% | 19.9% | 23.9% | 24.1% |
| NT5C1A       | 84618  | 18.3% | 38.5% | 15.6% | 24.1% |
| DYX1C1       | 161582 | 17.6% | 27.3% | 27.5% | 24.1% |
| SNX24        | 28966  | 25.9% | 20.3% | 26.1% | 24.1% |
| KIAA0319     | 9856   | 34.5% | 20.3% | 17.5% | 24.1% |
| MGC33887     | 201134 | 27.9% | 15.1% | 29.3% | 24.1% |
| MGC10233     | 219899 | 18.6% | 35.0% | 18.6% | 24.1% |
| OR56B4       | 196335 | 38.2% | 15.4% | 18.8% | 24.1% |
| BARHL1       | 56751  | 37.5% | 14.7% | 20.1% | 24.1% |
| MGC3121      | 78994  | 36.2% | 13.8% | 22.3% | 24.1% |
| SAP18        | 10284  | 40.2% | 12.2% | 19.9% | 24.1% |
| 3'HEXO       | 90459  | 25.0% | 21.6% | 25.7% | 24.1% |
| C9ORF93      | 203238 | 29.1% | 22.5% | 20.7% | 24.1% |
| LOC63928     | 63928  | 25.8% | 27.4% | 19.1% | 24.1% |
| BMP5         | 653    | 30.2% | 20.5% | 21.6% | 24.1% |
| APOB48R      | 55911  | 31.0% | 16.1% | 25.2% | 24.1% |
| TSGA2        | 89765  | 32.9% | 14.5% | 24.9% | 24.1% |
| GPAT2        | 55105  | 26.1% | 21.2% | 25.1% | 24.1% |
| C1ORF32      | 387597 | 33.5% | 16.6% | 22.3% | 24.1% |
| FLJ10201     | 55689  | 25.7% | 13.2% | 33.4% | 24.1% |
| OR911        | 219954 | 11.5% | 36.2% | 24.6% | 24.1% |
| UNQ483       | 388555 | 16.7% | 18.4% | 37.3% | 24.1% |
| OR8J3        | 81168  | 29.6% | 19.7% | 23.0% | 24.1% |
| VPS33A       | 65082  | 28.0% | 23.4% | 20.9% | 24.1% |
| SLC20A1      | 6574   | 26.7% | 24.6% | 21.0% | 24.1% |
| LOC91752     | 91752  | 25.5% | 14.6% | 32.2% | 24.1% |
| LOC400566    | 400566 | 19.6% | 21.4% | 31.3% | 24.1% |
| EFG1         | 85476  | 30.3% | 22.3% | 19.8% | 24.1% |
| FAS          | 355    | 22.8% | 22.2% | 27.4% | 24.1% |
| AGER         | 177    | 33.8% | 20.2% | 18.3% | 24.1% |
| TBX3         | 6926   | 38.1% | 12.0% | 22.2% | 24.1% |
| SCGB2A2      | 4250   | 33.6% | 22.0% | 16.7% | 24.1% |
| EBF2         | 64641  | 20.7% | 19.1% | 32.5% | 24.1% |
| LMTK3        | 114783 | 17.9% | 33.2% | 21.4% | 24.1% |
| KCNJ12       | 3768   | 32.0% | 19.0% | 21.4% | 24.1% |
| FLJ20171     | 54845  | 31.7% | 11.2% | 29.4% | 24.1% |
| GALNTL5      | 168391 | 30.3% | 20.8% | 21.4% | 24.1% |
| IL17C        | 27189  | 20.6% | 28.5% | 23.4% | 24.1% |
| LOC138255    | 138255 | 22.9% | 25.9% | 23.6% | 24.1% |
| SIAH1        | 6477   | 26.7% | 29.3% | 16.4% | 24.1% |
| LOC90826     | 90826  | 30.4% | 18.0% | 24.0% | 24.1% |
| SPAG9        | 9043   | 24.4% | 20.3% | 27.8% | 24.1% |
| ALCAM        | 214    | 21.5% | 23.9% | 27.0% | 24.1% |
| TXNDC12      | 51060  | 22.2% | 25.1% | 25.2% | 24.1% |
| LOC146542    | 146542 | 26.8% | 13.2% | 32.4% | 24.1% |
| NIPAZ        | 81614  | 20.9% | 21.1% | 30.5% | 24.1% |
| FLJ12886     | 56006  | 27.1% | 7.7%  | 37.6% | 24.1% |
| IL26         | 55801  | 29.1% | 23.0% | 20.3% | 24.1% |
| PRG-3        | 54886  | 27.2% | 13.5% | 31.7% | 24.1% |
| C6ORF81      | 221481 | 29.5% | 19.7% | 23.2% | 24.1% |
| ZNF232       | 7775   | 29.0% | 18.9% | 24.5% | 24.1% |
| LATS1        | 9113   | 18.8% | 29.3% | 24.4% | 24.2% |
| ZNF133       | 7692   | 30.9% | 20.1% | 21.5% | 24.2% |
| AHI1         | 54806  | 25.0% | 29.3% | 18.1% | 24.2% |
| UBQLN2       | 29978  | 17.4% | 26.9% | 28.2% | 24.2% |
| LOC90736     | 90736  | 25.7% | 21.8% | 25.0% | 24.2% |
| SDC1         | 6382   | 37.6% | 19.9% | 15.0% | 24.2% |
| NEK7         | 140609 | 23.9% | 26.1% | 22.4% | 24.2% |
| ITR          | 160897 | 23.6% | 9.6%  | 39.3% | 24.2% |
| NF1          | 4763   | 27.7% | 20.2% | 24.5% | 24.2% |
| OR2D2        | 120776 | 28.3% | 25.2% | 19.0% | 24.2% |
| OR7G3        | 390883 | 25.4% | 30.0% | 17.1% | 24.2% |
| LOC113730    | 113730 | 21.3% | 19.4% | 31.8% | 24.2% |
| LOC151194    | 151194 | 24.5% | 9.2%  | 38.7% | 24.2% |
| NDUFA4       | 4697   | 30.3% | 19.5% | 22.7% | 24.2% |
| MGC40047     | 284521 | 17.6% | 22.7% | 32.2% | 24.2% |
| MAGED2       | 10916  | 25.5% | 18.4% | 28.6% | 24.2% |
| MAK3         | 80218  | 33.0% | 18.3% | 21.2% | 24.2% |
| CNTF         | 1270   | 19.2% | 25.8% | 27.6% | 24.2% |
| FOXJ1        | 2302   | 33.3% | 26.7% | 12.5% | 24.2% |
| MRPL49       | 740    | 32.3% | 18.7% | 21.5% | 24.2% |
| INS          | 3630   | 33.9% | 16.2% | 22.4% | 24.2% |
| ITGA8        | 8516   | 23.3% | 26.0% | 23.2% | 24.2% |
| NT5C1B       | 93034  | 22.0% | 27.5% | 23.1% | 24.2% |
| DKFZP564B147 | 26071  | 24.5% | 18.6% | 29.5% | 24.2% |
| RBP3         | 5949   | 26.5% | 24.8% | 21.2% | 24.2% |
| LRMP         | 4033   | 31.0% | 27.3% | 14.2% | 24.2% |
| EFEMP2       | 30008  | 32.3% | 11.6% | 28.7% | 24.2% |
| C18orf56     | 494514 | 29.7% | 20.3% | 22.5% | 24.2% |
| ISGF3G       | 10379  | 38.2% | 13.8% | 20.5% | 24.2% |
| OFCC1        | 266553 | 27.9% | 27.0% | 17.5% | 24.2% |
| HS3ST1       | 9957   | 25.7% | 21.9% | 25.0% | 24.2% |
| NS           | 26354  | 25.5% | 13.2% | 33.9% | 24.2% |
| ZNF567       | 163081 | 32.8% | 18.5% | 21.3% | 24.2% |
| FPRL1        | 2358   | 29.3% | 19.2% | 24.1% | 24.2% |
| AMICA        | 120425 | 17.9% | 24.0% | 30.7% | 24.2% |
| IL7          | 3574   | 27.8% | 24.5% | 20.2% | 24.2% |
| NDST1        | 3340   | 28.9% | 17.8% | 25.9% | 24.2% |
| CACNB2       | 783    | 33.1% | 13.5% | 26.0% | 24.2% |
| DREV1        | 51108  | 23.5% | 15.6% | 33.4% | 24.2% |
| ZNF160       | 90338  | 33.2% | 20.0% | 19.4% | 24.2% |
| ASNA1        | 439    | 37.8% | 18.2% | 16.6% | 24.2% |
| DLEC1        | 9940   | 28.8% | 18.8% | 25.0% | 24.2% |
| KRTAP5-2     | 440021 | 29.9% | 25.0% | 17.7% | 24.2% |
| HINT1        | 3094   | 21.7% | 19.7% | 31.2% | 24.2% |
| PDLIM2       | 64236  | 30.6% | 16.7% | 25.3% | 24.2% |
| TRIM43       | 129868 | 25.7% | 19.1% | 27.8% | 24.2% |
| IKKBK        | 3551   | 14.3% | 30.4% | 27.8% | 24.2% |

|               |        |       |       |       |       |
|---------------|--------|-------|-------|-------|-------|
| RNF185        | 91445  | 25.1% | 18.0% | 29.5% | 24.2% |
| FLJ11151      | 55313  | 27.2% | 27.3% | 18.1% | 24.2% |
| P66BETA       | 57459  | 29.6% | 21.5% | 21.5% | 24.2% |
| PTPRM         | 5797   | 26.8% | 20.5% | 25.3% | 24.2% |
| ECHS1         | 1892   | 32.9% | 15.9% | 23.8% | 24.2% |
| PYM           | 84305  | 25.7% | 11.2% | 35.7% | 24.2% |
| ACOT1         | 641371 | 34.3% | 11.3% | 27.0% | 24.2% |
| NAGK          | 55577  | 17.5% | 29.4% | 25.7% | 24.2% |
| RNASE8        | 122665 | 31.3% | 16.6% | 24.7% | 24.2% |
| FAM8A1        | 51439  | 33.5% | 19.6% | 19.5% | 24.2% |
| PHACTR4       | 65979  | 14.9% | 33.8% | 24.0% | 24.2% |
| DRD4          | 1815   | 31.0% | 21.3% | 20.3% | 24.2% |
| FXC1          | 26515  | 35.0% | 11.2% | 26.4% | 24.2% |
| C10ORF81      | 79949  | 18.5% | 26.4% | 27.7% | 24.2% |
| LOC81569      | 81569  | 18.4% | 21.2% | 33.0% | 24.2% |
| NFATC4        | 4776   | 27.6% | 23.7% | 21.3% | 24.2% |
| LOC283385     | 283385 | 22.0% | 23.7% | 26.9% | 24.2% |
| C1ORF9        | 51430  | 20.0% | 17.6% | 35.0% | 24.2% |
| KRTHA8        | 8687   | 33.3% | 16.1% | 23.2% | 24.2% |
| MGC15523      | 124565 | 32.7% | 17.9% | 22.0% | 24.2% |
| SLC5A7        | 60482  | 33.5% | 18.2% | 20.9% | 24.2% |
| SLC13A4       | 26266  | 23.7% | 27.0% | 22.0% | 24.2% |
| LBP           | 3929   | 34.9% | 11.1% | 26.6% | 24.2% |
| APTX          | 54840  | 18.6% | 27.5% | 26.5% | 24.2% |
| TXN           | 7295   | 35.6% | 22.1% | 14.9% | 24.2% |
| AZU1          | 566    | 31.8% | 21.1% | 19.7% | 24.2% |
| ARS2          | 51593  | 25.0% | 14.3% | 33.3% | 24.2% |
| ADAMTS7       | 11173  | 28.7% | 22.1% | 21.9% | 24.2% |
| MARLIN1       | 152789 | 19.7% | 13.3% | 39.7% | 24.2% |
| FAM18B        | 51030  | 33.4% | 19.0% | 20.2% | 24.2% |
| LSECTIN       | 339390 | 19.4% | 21.2% | 32.0% | 24.2% |
| MTAP          | 4507   | 30.1% | 16.6% | 25.9% | 24.2% |
| BNIP1         | 149428 | 24.7% | 20.5% | 27.4% | 24.2% |
| DEFA1         | 1667   | 30.6% | 18.6% | 23.4% | 24.2% |
| CASC1         | 55259  | 13.7% | 27.0% | 31.9% | 24.2% |
| LOC401429     | 155060 | 32.6% | 16.0% | 24.1% | 24.2% |
| MGC39558      | 148789 | 34.2% | 18.9% | 19.5% | 24.2% |
| LOC123872     | 123872 | 18.5% | 15.3% | 38.8% | 24.2% |
| BAIAP1        | 9223   | 20.4% | 33.9% | 18.3% | 24.2% |
| CCT2          | 10576  | 30.0% | 19.3% | 23.3% | 24.2% |
| CATSPER2      | 117155 | 31.1% | 19.0% | 22.6% | 24.2% |
| MYR8          | 23026  | 15.7% | 24.5% | 32.5% | 24.2% |
| OR4K15        | 81127  | 28.7% | 23.1% | 20.8% | 24.2% |
| TMEM33        | 55161  | 29.3% | 26.8% | 16.5% | 24.2% |
| C14ORF130     | 55148  | 38.9% | 17.9% | 15.9% | 24.2% |
| FOX11         | 2300   | 21.8% | 18.6% | 32.3% | 24.2% |
| HMG2          | 8091   | 23.8% | 27.2% | 21.7% | 24.2% |
| SLC6A6        | 6533   | 29.9% | 25.6% | 17.1% | 24.2% |
| KND1C1        | 85442  | 29.7% | 20.9% | 22.0% | 24.2% |
| EML2          | 24139  | 25.4% | 20.2% | 27.0% | 24.2% |
| NOKO1         | 124056 | 35.0% | 26.2% | 11.4% | 24.2% |
| BRMS1         | 25855  | 34.6% | 18.7% | 19.4% | 24.2% |
| BLK           | 640    | 33.6% | 16.4% | 22.7% | 24.2% |
| FOXP4         | 116113 | 16.7% | 29.3% | 26.7% | 24.2% |
| RG9MTD1       | 54931  | 35.2% | 14.8% | 22.7% | 24.2% |
| TLR10         | 81793  | 25.7% | 18.6% | 28.4% | 24.2% |
| HTRA4         | 203100 | 25.6% | 23.0% | 24.1% | 24.2% |
| AGTRAP        | 57085  | 25.0% | 29.4% | 18.3% | 24.2% |
| STXB3         | 6814   | 24.5% | 23.4% | 24.7% | 24.2% |
| UMPS          | 7372   | 25.2% | 24.7% | 22.8% | 24.2% |
| LEAP-2        | 116842 | 22.9% | 20.6% | 29.2% | 24.2% |
| MN1           | 4330   | 28.8% | 23.9% | 20.0% | 24.2% |
| IFI27         | 3429   | 25.0% | 24.4% | 23.2% | 24.2% |
| HMG20A        | 10363  | 36.1% | 16.3% | 20.3% | 24.2% |
| DJ328E19.C1.1 | 25832  | 22.7% | 15.2% | 34.8% | 24.2% |
| CASP9         | 842    | 24.4% | 22.7% | 25.6% | 24.2% |
| GALNT9        | 50614  | 29.9% | 16.1% | 26.6% | 24.2% |
| SLC10A1       | 6554   | 33.5% | 24.0% | 15.2% | 24.2% |
| NDUF811       | 54539  | 28.4% | 13.7% | 30.5% | 24.2% |
| LCN8          | 138307 | 31.1% | 18.9% | 22.7% | 24.2% |
| NMT2          | 9397   | 26.7% | 23.7% | 22.3% | 24.2% |
| PER3          | 8863   | 25.6% | 28.1% | 18.9% | 24.2% |
| FCER2         | 2208   | 34.1% | 14.7% | 23.9% | 24.2% |
| TNFRSF14      | 8764   | 31.9% | 22.9% | 17.9% | 24.2% |
| SLC31A2       | 1318   | 27.5% | 20.2% | 25.1% | 24.2% |
| RASD1         | 51655  | 19.0% | 26.6% | 27.1% | 24.2% |
| ASB2          | 51676  | 21.1% | 26.8% | 24.8% | 24.2% |
| PEX5          | 5830   | 19.4% | 25.3% | 28.1% | 24.2% |
| PNPLA2        | 57104  | 22.8% | 32.3% | 17.7% | 24.2% |
| TRIP12        | 9320   | 24.8% | 21.7% | 26.2% | 24.2% |
| CHCHD4        | 131474 | 26.1% | 22.1% | 24.6% | 24.2% |
| CCAR1         | 55749  | 17.8% | 23.0% | 32.0% | 24.2% |
| LRCH3         | 84859  | 18.5% | 26.4% | 27.8% | 24.2% |
| TAGLN2        | 8407   | 24.7% | 26.5% | 21.5% | 24.2% |
| MGC54289      | 128338 | 24.7% | 16.7% | 31.4% | 24.2% |
| C20ORF13      | 55617  | 30.2% | 16.7% | 25.9% | 24.2% |
| LSM11         | 134353 | 23.6% | 22.1% | 27.1% | 24.3% |
| TBC1D1        | 23216  | 25.9% | 22.3% | 24.6% | 24.3% |
| CLU           | 1191   | 22.6% | 27.3% | 22.8% | 24.3% |
| NTRK3         | 4916   | 28.7% | 20.3% | 23.8% | 24.3% |
| NCOR2         | 9612   | 23.9% | 23.9% | 24.9% | 24.3% |
| LOC283985     | 283985 | 21.8% | 20.8% | 30.2% | 24.3% |
| TMX2          | 51075  | 23.5% | 24.5% | 24.8% | 24.3% |
| KIAA0377      | 9677   | 32.9% | 27.1% | 12.8% | 24.3% |
| B3GALT1       | 8708   | 24.9% | 29.0% | 18.9% | 24.3% |
| PANK1         | 53354  | 23.7% | 24.7% | 24.4% | 24.3% |
| FLJ23091      | 79971  | 21.0% | 15.7% | 36.1% | 24.3% |
| CARM1         | 10498  | 35.9% | 14.7% | 22.1% | 24.3% |

|              |        |       |       |       |       |
|--------------|--------|-------|-------|-------|-------|
| DKFZP434B227 | 84223  | 19.2% | 18.2% | 35.3% | 24.3% |
| TRPM4        | 54795  | 23.8% | 19.1% | 29.9% | 24.3% |
| ELOVL4       | 6785   | 25.0% | 19.4% | 28.4% | 24.3% |
| MAP1A        | 4130   | 30.3% | 22.3% | 20.1% | 24.3% |
| TUBGCP6      | 85378  | 31.4% | 19.4% | 22.0% | 24.3% |
| NAP1L2       | 4674   | 28.1% | 17.2% | 27.5% | 24.3% |
| IL21R        | 50615  | 20.8% | 26.0% | 25.9% | 24.3% |
| MGC10911     | 84262  | 32.5% | 15.9% | 24.4% | 24.3% |
| SOST         | 50964  | 31.3% | 19.4% | 22.2% | 24.3% |
| FGF23        | 8074   | 20.9% | 26.2% | 25.6% | 24.3% |
| IFIX         | 149628 | 26.0% | 6.9%  | 39.9% | 24.3% |
| OSBPL1A      | 114876 | 26.5% | 23.2% | 23.1% | 24.3% |
| RBM23        | 55147  | 33.9% | 15.3% | 23.6% | 24.3% |
| LOC136263    | 136263 | 26.3% | 15.5% | 31.0% | 24.3% |
| GRAP         | 10750  | 23.1% | 25.5% | 24.2% | 24.3% |
| OSTALPHA     | 200931 | 37.3% | 13.6% | 21.9% | 24.3% |
| KIF1B        | 23095  | 27.7% | 26.6% | 18.5% | 24.3% |
| AKAP2        | 11217  | 29.9% | 20.7% | 22.3% | 24.3% |
| ACY-3        | 91703  | 29.2% | 23.7% | 19.9% | 24.3% |
| MBD4         | 8930   | 29.3% | 19.3% | 24.3% | 24.3% |
| TEX13B       | 56156  | 42.3% | 11.1% | 19.4% | 24.3% |
| LOC151835    | 151835 | 17.9% | 19.6% | 35.4% | 24.3% |
| FLJ22349     | 79879  | 26.6% | 17.2% | 29.0% | 24.3% |
| CBFA2T2      | 9139   | 24.7% | 29.8% | 18.4% | 24.3% |
| PCLKC        | 54825  | 24.4% | 23.0% | 25.4% | 24.3% |
| C7ORF9       | 64111  | 24.0% | 15.5% | 33.3% | 24.3% |
| USP51        | 158880 | 28.2% | 19.5% | 25.1% | 24.3% |
| GPR103       | 84109  | 25.9% | 20.6% | 26.4% | 24.3% |
| GALGT        | 2583   | 33.1% | 19.2% | 20.5% | 24.3% |
| NAT2         | 10     | 17.9% | 17.7% | 37.3% | 24.3% |
| GABRR3       | 200959 | 31.1% | 19.9% | 21.9% | 24.3% |
| RAB6C        | 84084  | 45.5% | 7.7%  | 19.7% | 24.3% |
| COX7A2L      | 9167   | 27.9% | 24.3% | 20.7% | 24.3% |
| HOXC13       | 3229   | 37.9% | 20.3% | 14.6% | 24.3% |
| VPS13C       | 54832  | 20.5% | 29.4% | 22.9% | 24.3% |
| ADAMTS8      | 11095  | 30.2% | 21.9% | 20.8% | 24.3% |
| LOC220416    | 220416 | 28.2% | 13.4% | 31.3% | 24.3% |
| LOC222967    | 222967 | 39.5% | 20.2% | 13.1% | 24.3% |
| LOC200030    | 200030 | 22.6% | 19.2% | 31.0% | 24.3% |
| GAL3ST1      | 9514   | 33.9% | 18.2% | 20.7% | 24.3% |
| MGC21688     | 131408 | 17.7% | 18.5% | 36.7% | 24.3% |
| GNA11        | 2767   | 26.6% | 23.4% | 22.9% | 24.3% |
| FLJ31166     | 120939 | 22.1% | 17.3% | 33.5% | 24.3% |
| SGPP2        | 130367 | 27.9% | 25.3% | 19.7% | 24.3% |
| LOC441518    | 441518 | 20.1% | 27.5% | 25.2% | 24.3% |
| C2ORF29      | 55571  | 32.4% | 18.1% | 22.4% | 24.3% |
| CALML3       | 810    | 31.6% | 16.7% | 24.6% | 24.3% |
| SDAD1        | 55153  | 19.8% | 28.0% | 25.0% | 24.3% |
| CUL4A        | 8451   | 24.2% | 18.4% | 30.3% | 24.3% |
| FLJ13215     | 80071  | 17.8% | 27.6% | 27.5% | 24.3% |
| SCD          | 6319   | 27.4% | 22.9% | 22.5% | 24.3% |
| ABCA6        | 23460  | 21.3% | 26.6% | 25.0% | 24.3% |
| RICS         | 9743   | 26.3% | 21.9% | 24.7% | 24.3% |
| SPRED3       | 399473 | 29.7% | 16.4% | 26.8% | 24.3% |
| NSG-X        | 27099  | 22.7% | 16.1% | 34.0% | 24.3% |
| CFHL1        | 3078   | 24.5% | 17.9% | 30.5% | 24.3% |
| FLJ13305     | 84140  | 35.3% | 16.7% | 20.9% | 24.3% |
| FMO5         | 2330   | 30.6% | 24.5% | 17.8% | 24.3% |
| LOC90288     | 90288  | 19.3% | 16.0% | 37.6% | 24.3% |
| LOC127253    | 127253 | 17.1% | 27.9% | 27.8% | 24.3% |
| MTHFD2L      | 441024 | 30.3% | 20.6% | 22.0% | 24.3% |
| OR2C3        | 81472  | 30.4% | 13.0% | 29.5% | 24.3% |
| DIBD1        | 79796  | 19.4% | 20.5% | 33.0% | 24.3% |
| RRP22        | 10633  | 26.4% | 23.1% | 23.4% | 24.3% |
| NRXN3        | 9369   | 28.2% | 27.3% | 17.4% | 24.3% |
| PCNX         | 22990  | 38.3% | 11.7% | 22.9% | 24.3% |
| BBX          | 56987  | 30.0% | 20.1% | 22.8% | 24.3% |
| MLH3         | 27030  | 42.0% | 12.9% | 18.1% | 24.3% |
| SMS          | 6611   | 25.9% | 21.2% | 25.8% | 24.3% |
| LOC90639     | 90639  | 20.7% | 25.9% | 26.4% | 24.3% |
| DLX1         | 1745   | 15.6% | 24.0% | 33.3% | 24.3% |
| PSFL         | 83464  | 39.7% | 11.3% | 21.9% | 24.3% |
| SNTB1        | 6641   | 18.6% | 20.6% | 33.7% | 24.3% |
| PHKA1        | 5255   | 17.2% | 28.7% | 27.1% | 24.3% |
| TXNDC4       | 23071  | 25.2% | 27.1% | 20.6% | 24.3% |
| FUT1         | 2523   | 31.2% | 24.7% | 17.1% | 24.3% |
| CGI-12       | 51001  | 20.6% | 21.1% | 31.2% | 24.3% |
| ORSM3        | 219482 | 36.7% | 17.0% | 19.2% | 24.3% |
| SFRS14       | 10147  | 24.5% | 18.8% | 29.6% | 24.3% |
| MGC39725     | 132141 | 24.5% | 14.0% | 34.4% | 24.3% |
| MGC5306      | 79101  | 23.4% | 16.1% | 33.4% | 24.3% |
| HNRPA0       | 10949  | 28.4% | 26.2% | 18.4% | 24.3% |
| GALNT14      | 79623  | 33.2% | 13.9% | 25.9% | 24.3% |
| FLJ43093     | 401258 | 32.1% | 21.3% | 19.6% | 24.3% |
| GNG7         | 2788   | 27.4% | 14.2% | 31.3% | 24.3% |
| GPR85        | 54329  | 26.9% | 22.4% | 23.7% | 24.3% |
| FLJ32954     | 151393 | 20.6% | 17.7% | 34.6% | 24.3% |
| USP47        | 55031  | 21.8% | 29.2% | 22.0% | 24.3% |
| NANS         | 54187  | 21.7% | 32.3% | 19.0% | 24.3% |
| HLA-DPA1     | 3113   | 33.3% | 18.7% | 20.9% | 24.3% |
| IGF2AS       | 51214  | 33.4% | 19.6% | 19.9% | 24.3% |
| ADRBK2       | 157    | 19.4% | 24.0% | 29.6% | 24.3% |
| DDX54        | 79039  | 32.3% | 12.6% | 28.0% | 24.3% |
| PSTPIP1      | 9051   | 37.8% | 21.5% | 13.7% | 24.3% |
| WBSR22       | 114049 | 19.4% | 23.4% | 30.2% | 24.3% |
| C9ORF47      | 286223 | 27.3% | 13.3% | 32.4% | 24.3% |
| CEACAM1      | 634    | 29.8% | 25.3% | 17.9% | 24.3% |
| PAX4         | 5078   | 31.4% | 18.0% | 23.5% | 24.3% |

|              |        |       |       |       |       |
|--------------|--------|-------|-------|-------|-------|
| ERCC3        | 2071   | 36.4% | 18.5% | 18.1% | 24.3% |
| GFPT2        | 9945   | 28.3% | 23.0% | 21.7% | 24.3% |
| TGFBFR1      | 7046   | 26.8% | 19.9% | 26.3% | 24.3% |
| STK23        | 26576  | 26.2% | 20.3% | 26.5% | 24.3% |
| C20ORF23     | 55614  | 30.2% | 20.3% | 22.5% | 24.3% |
| RBMV1A1      | 5940   | 31.0% | 17.3% | 24.7% | 24.3% |
| GALNT12      | 79695  | 29.6% | 20.1% | 23.4% | 24.3% |
| USP16        | 10600  | 34.0% | 16.8% | 22.2% | 24.3% |
| SEZ6L        | 23544  | 35.7% | 9.3%  | 28.0% | 24.3% |
| GNRHR        | 2798   | 27.8% | 22.0% | 23.2% | 24.3% |
| C6ORF62      | 81688  | 21.8% | 31.0% | 20.3% | 24.3% |
| SOX11        | 6664   | 24.6% | 18.8% | 29.6% | 24.3% |
| C1D          | 10438  | 30.7% | 20.1% | 22.3% | 24.3% |
| SHANK2       | 22941  | 29.8% | 25.5% | 17.6% | 24.3% |
| LOC126731    | 126731 | 20.4% | 27.5% | 25.2% | 24.3% |
| LOC126295    | 126295 | 18.2% | 27.6% | 27.2% | 24.3% |
| LCN12        | 286256 | 30.3% | 15.8% | 27.0% | 24.3% |
| HMOX1        | 3162   | 37.0% | 20.6% | 15.4% | 24.3% |
| UBL4         | 8266   | 27.2% | 24.9% | 20.9% | 24.3% |
| MRC1         | 4360   | 38.8% | 12.8% | 21.4% | 24.3% |
| FLJ20898     | 79652  | 16.8% | 23.5% | 32.7% | 24.3% |
| AVP          | 551    | 25.8% | 16.7% | 30.5% | 24.3% |
| KCNK15       | 60598  | 26.7% | 22.0% | 24.4% | 24.3% |
| STK11        | 6794   | 16.8% | 22.6% | 33.6% | 24.4% |
| IFNA8        | 3445   | 30.3% | 23.5% | 19.2% | 24.4% |
| LOC145497    | 145497 | 21.6% | 22.8% | 28.7% | 24.4% |
| IRAK3        | 11213  | 15.4% | 31.1% | 26.5% | 24.4% |
| LOC56181     | 56181  | 13.4% | 20.3% | 39.4% | 24.4% |
| NXF5         | 55998  | 32.5% | 13.0% | 27.6% | 24.4% |
| GALC         | 2581   | 19.4% | 31.0% | 22.7% | 24.4% |
| KIAA0648     | 23244  | 20.3% | 23.6% | 29.2% | 24.4% |
| FLJ39378     | 353116 | 28.9% | 25.4% | 18.8% | 24.4% |
| VCP          | 7415   | 38.9% | 14.5% | 19.7% | 24.4% |
| CRYBB3       | 1417   | 30.7% | 25.7% | 16.7% | 24.4% |
| C1ORF27      | 54953  | 20.7% | 18.5% | 33.9% | 24.4% |
| OR9Q2        | 219957 | 28.7% | 18.8% | 25.6% | 24.4% |
| LOC55974     | 55974  | 27.4% | 17.9% | 27.8% | 24.4% |
| VN1R4        | 317703 | 28.5% | 24.0% | 20.6% | 24.4% |
| KIAA1185     | 57470  | 31.0% | 14.5% | 27.6% | 24.4% |
| ARNT         | 405    | 26.2% | 20.2% | 26.7% | 24.4% |
| C22ORF11     | 26150  | 18.3% | 29.4% | 25.3% | 24.4% |
| FLJ35220     | 284131 | 27.8% | 24.7% | 20.6% | 24.4% |
| ID1          | 3397   | 34.8% | 21.5% | 16.8% | 24.4% |
| LOC219854    | 219854 | 25.0% | 26.6% | 21.5% | 24.4% |
| COL19A1      | 1310   | 23.5% | 15.1% | 34.5% | 24.4% |
| MCM4         | 4173   | 25.0% | 23.1% | 25.0% | 24.4% |
| ABCC10       | 89845  | 30.9% | 19.7% | 22.6% | 24.4% |
| PLA2G2D      | 26279  | 27.1% | 22.0% | 24.0% | 24.4% |
| GSH1         | 219409 | 33.3% | 18.0% | 21.8% | 24.4% |
| TEGT         | 7009   | 26.0% | 29.4% | 17.8% | 24.4% |
| RNH          | 6050   | 31.0% | 19.0% | 23.2% | 24.4% |
| ARHGEF11     | 9826   | 25.6% | 27.7% | 19.7% | 24.4% |
| FLJ23825     | 284004 | 17.7% | 25.2% | 30.2% | 24.4% |
| FKBP7        | 51661  | 26.7% | 25.7% | 20.7% | 24.4% |
| SPAG11A      | 653423 | 40.0% | 21.3% | 11.9% | 24.4% |
| NPC1         | 4864   | 32.1% | 24.7% | 16.4% | 24.4% |
| SPON1        | 10418  | 33.1% | 18.7% | 21.4% | 24.4% |
| AGXT2        | 64902  | 31.8% | 7.4%  | 33.9% | 24.4% |
| FLJ11838     | 79717  | 28.2% | 20.4% | 24.5% | 24.4% |
| LCN6         | 158062 | 37.7% | 22.7% | 12.8% | 24.4% |
| SLAMF8       | 56833  | 33.3% | 21.9% | 17.9% | 24.4% |
| DKFZP572C163 | 26149  | 19.6% | 26.2% | 27.4% | 24.4% |
| MGC35118     | 145942 | 26.2% | 10.6% | 36.4% | 24.4% |
| GLI3         | 2737   | 30.3% | 16.3% | 26.6% | 24.4% |
| KRT19        | 3880   | 18.6% | 23.0% | 31.5% | 24.4% |
| FLJ20487     | 54949  | 18.5% | 24.9% | 29.7% | 24.4% |
| DNASE1       | 1773   | 35.3% | 18.3% | 19.5% | 24.4% |
| KIAA0582     | 23177  | 24.7% | 11.9% | 36.6% | 24.4% |
| TOP3A        | 7156   | 27.1% | 18.0% | 28.1% | 24.4% |
| BARD1        | 580    | 26.5% | 19.7% | 26.9% | 24.4% |
| NAT8         | 9027   | 24.8% | 26.1% | 22.4% | 24.4% |
| ADCY1        | 107    | 29.5% | 21.8% | 21.9% | 24.4% |
| ATP5A1       | 498    | 31.0% | 21.8% | 20.4% | 24.4% |
| KIAA1287     | 57508  | 21.0% | 16.7% | 35.5% | 24.4% |
| ABC4         | 5244   | 36.2% | 15.2% | 21.7% | 24.4% |
| SLC24A1      | 9187   | 23.3% | 23.7% | 26.2% | 24.4% |
| GALNT6       | 11226  | 18.8% | 35.1% | 19.2% | 24.4% |
| PRAMEF4      | 400735 | 28.6% | 20.1% | 24.5% | 24.4% |
| KIAA0652     | 9776   | 24.6% | 22.8% | 25.8% | 24.4% |
| LOC144233    | 144233 | 25.5% | 20.4% | 27.3% | 24.4% |
| TAF12        | 6883   | 23.8% | 22.7% | 26.7% | 24.4% |
| PCGF3        | 10336  | 27.7% | 18.0% | 27.4% | 24.4% |
| CDK4         | 1019   | 27.1% | 22.8% | 23.4% | 24.4% |
| MK-STYX      | 51657  | 28.6% | 23.7% | 20.9% | 24.4% |
| KRT13        | 3860   | 15.2% | 23.6% | 34.5% | 24.4% |
| LAPTM4B      | 55353  | 28.6% | 21.0% | 23.7% | 24.4% |
| MGC2574      | 79080  | 21.0% | 27.8% | 24.4% | 24.4% |
| TTMA         | 645369 | 23.6% | 27.4% | 22.3% | 24.4% |
| YME1L1       | 10730  | 32.4% | 21.4% | 19.5% | 24.4% |
| PIWIL2       | 55124  | 26.4% | 18.5% | 28.3% | 24.4% |
| FLJ32745     | 165055 | 29.1% | 20.6% | 23.6% | 24.4% |
| FLJ10159     | 55084  | 22.2% | 21.9% | 29.1% | 24.4% |
| AKR7A3       | 22977  | 25.0% | 19.5% | 28.8% | 24.4% |
| MRPS5        | 64969  | 26.2% | 22.8% | 24.2% | 24.4% |
| NEURL2       | 140825 | 33.7% | 17.5% | 22.0% | 24.4% |
| TRIM40       | 135644 | 32.9% | 24.3% | 16.0% | 24.4% |
| ELTD1        | 64123  | 19.0% | 24.7% | 29.5% | 24.4% |
| TRIP10       | 9322   | 29.2% | 27.0% | 17.1% | 24.4% |

|           |        |       |       |       |       |
|-----------|--------|-------|-------|-------|-------|
| FLJ23049  | 79740  | 26.7% | 23.7% | 22.9% | 24.4% |
| HSPB3     | 8988   | 33.6% | 23.5% | 16.2% | 24.4% |
| LOC343637 | 343637 | 20.6% | 21.4% | 31.2% | 24.4% |
| HIST1H2AE | 3012   | 31.1% | 24.9% | 17.3% | 24.4% |
| ZNF529    | 57711  | 37.3% | 14.1% | 21.9% | 24.4% |
| KCNE4     | 23704  | 30.7% | 18.8% | 23.8% | 24.4% |
| FLJ23322  | 80020  | 23.2% | 12.8% | 37.2% | 24.4% |
| ASPRV1    | 151516 | 18.8% | 28.6% | 25.8% | 24.4% |
| FLJ23420  | 80131  | 26.2% | 12.9% | 34.2% | 24.4% |
| UNQ2754   | 389610 | 16.3% | 24.6% | 32.4% | 24.4% |
| EFO1      | 114799 | 29.4% | 15.2% | 28.6% | 24.4% |
| FLJ12650  | 79570  | 18.5% | 24.6% | 30.2% | 24.4% |
| FLJ10901  | 55765  | 29.3% | 10.4% | 33.6% | 24.4% |
| LOC201725 | 201725 | 26.0% | 22.8% | 24.5% | 24.4% |
| TG        | 7038   | 32.6% | 24.2% | 16.4% | 24.4% |
| KCNMB2    | 10242  | 32.1% | 17.0% | 24.1% | 24.4% |
| CISH      | 1154   | 33.8% | 21.1% | 18.3% | 24.4% |
| NPHS1     | 4868   | 30.1% | 22.8% | 20.4% | 24.4% |
| UBE2Q1    | 55585  | 30.2% | 20.6% | 22.4% | 24.4% |
| C11ORF1   | 64776  | 25.5% | 26.5% | 21.3% | 24.4% |
| DACH1     | 1602   | 46.2% | 5.0%  | 22.2% | 24.4% |
| NOLA3     | 55505  | 18.5% | 21.5% | 33.3% | 24.4% |
| RAB7L1    | 8934   | 33.3% | 12.7% | 27.3% | 24.4% |
| BIMPER    | 168667 | 25.7% | 18.3% | 29.3% | 24.4% |
| FBXL6     | 26233  | 34.9% | 16.7% | 21.8% | 24.4% |
| KCTD3     | 51133  | 27.5% | 17.5% | 28.3% | 24.4% |
| GPSM1     | 26086  | 31.9% | 16.2% | 25.1% | 24.4% |
| ASRGL1    | 80150  | 38.4% | 11.9% | 23.0% | 24.4% |
| C17ORF31  | 23293  | 30.6% | 19.1% | 23.6% | 24.4% |
| E2IG4     | 25987  | 20.8% | 23.8% | 28.7% | 24.4% |
| IGF1R     | 3480   | 28.1% | 27.1% | 18.1% | 24.4% |
| WDR59     | 79726  | 24.7% | 21.7% | 27.0% | 24.4% |
| AKR7A2    | 8574   | 25.3% | 23.1% | 24.9% | 24.4% |
| SHAX3     | 92421  | 22.6% | 21.1% | 29.6% | 24.4% |
| LOC152185 | 152185 | 23.7% | 16.6% | 33.0% | 24.4% |
| LOC391723 | 391723 | 28.9% | 18.4% | 26.1% | 24.4% |
| HSPA14    | 51182  | 38.6% | 18.5% | 16.2% | 24.4% |
| LOC92270  | 92270  | 41.4% | 11.1% | 20.8% | 24.4% |
| ZNF295    | 49854  | 34.5% | 24.4% | 14.5% | 24.4% |
| EIF4EBP3  | 8637   | 23.1% | 22.2% | 28.0% | 24.4% |
| NOPD1     | 221078 | 23.4% | 20.2% | 29.7% | 24.4% |
| TGM6      | 343641 | 31.8% | 21.1% | 20.5% | 24.4% |
| DSG4      | 147409 | 35.8% | 11.0% | 26.6% | 24.4% |
| RTN4RL1   | 146760 | 34.0% | 25.0% | 14.3% | 24.4% |
| UQCRCF1   | 7386   | 24.5% | 16.9% | 32.0% | 24.4% |
| FBXL10    | 84678  | 29.8% | 17.8% | 25.7% | 24.4% |
| MARCH7    | 64844  | 25.2% | 19.3% | 28.8% | 24.5% |
| MIA       | 8190   | 32.9% | 18.4% | 22.1% | 24.5% |
| TTC4      | 7268   | 39.0% | 15.5% | 18.9% | 24.5% |
| LOC129530 | 129530 | 36.3% | 16.4% | 20.7% | 24.5% |
| NME5      | 8382   | 23.6% | 28.2% | 21.6% | 24.5% |
| LOC388199 | 388199 | 15.0% | 32.7% | 25.7% | 24.5% |
| GPR108    | 56927  | 28.2% | 20.8% | 24.4% | 24.5% |
| ASB10     | 136371 | 26.0% | 21.3% | 26.0% | 24.5% |
| JARID1B   | 10765  | 22.4% | 20.5% | 30.4% | 24.5% |
| ZBTB39    | 9880   | 26.1% | 27.6% | 19.7% | 24.5% |
| CDSN      | 1041   | 26.2% | 19.9% | 27.3% | 24.5% |
| ZNF7      | 7553   | 30.9% | 18.6% | 23.9% | 24.5% |
| AMPD1     | 270    | 27.4% | 23.8% | 22.3% | 24.5% |
| MFN2      | 9927   | 30.2% | 23.3% | 19.8% | 24.5% |
| C12ORF14  | 58516  | 25.9% | 15.3% | 32.2% | 24.5% |
| VGLL2     | 245806 | 31.7% | 23.2% | 18.6% | 24.5% |
| SLC16A10  | 117247 | 22.9% | 18.6% | 31.9% | 24.5% |
| WFDC6     | 140870 | 34.4% | 17.0% | 21.9% | 24.5% |
| FLJ22709  | 79629  | 30.5% | 6.6%  | 36.3% | 24.5% |
| SIGIRR    | 59307  | 34.1% | 20.6% | 18.6% | 24.5% |
| CCNL2     | 81669  | 23.0% | 28.2% | 22.2% | 24.5% |
| FGF13     | 2258   | 30.1% | 17.0% | 26.4% | 24.5% |
| MSH3      | 4437   | 30.6% | 19.2% | 23.6% | 24.5% |
| TMEM8     | 58986  | 30.0% | 23.9% | 19.5% | 24.5% |
| P2RY12    | 64805  | 22.6% | 23.9% | 26.9% | 24.5% |
| GAGE2     | 2574   | 25.9% | 29.4% | 18.1% | 24.5% |
| CD209     | 30835  | 25.8% | 18.8% | 28.8% | 24.5% |
| MRPL50    | 54534  | 36.2% | 18.7% | 18.6% | 24.5% |
| ZNF41     | 7592   | 35.4% | 17.5% | 20.5% | 24.5% |
| LILRB5    | 10990  | 27.0% | 28.3% | 18.1% | 24.5% |
| NUDT17    | 200035 | 30.4% | 20.1% | 23.0% | 24.5% |
| CABC1     | 56997  | 19.2% | 28.6% | 25.6% | 24.5% |
| TAB3      | 257397 | 13.4% | 21.1% | 39.0% | 24.5% |
| EIF3S6IP  | 51386  | 39.8% | 16.0% | 17.7% | 24.5% |
| MTCH1     | 23787  | 23.2% | 19.4% | 30.8% | 24.5% |
| MAP3K2    | 10746  | 27.1% | 24.9% | 21.4% | 24.5% |
| FLJ33817  | 124997 | 28.9% | 11.9% | 32.7% | 24.5% |
| RGS19     | 10287  | 31.4% | 21.5% | 20.5% | 24.5% |
| CTSG      | 1511   | 35.2% | 26.7% | 11.5% | 24.5% |
| SPINT2    | 10653  | 33.3% | 21.9% | 18.4% | 24.5% |
| CSRP3     | 8048   | 19.8% | 20.0% | 33.7% | 24.5% |
| EXOSC6    | 118460 | 24.3% | 22.0% | 27.1% | 24.5% |
| LOC390535 | 390535 | 15.9% | 23.6% | 34.0% | 24.5% |
| VTCN1     | 79679  | 25.7% | 21.5% | 26.3% | 24.5% |
| PIK3C2G   | 5288   | 25.1% | 25.1% | 23.2% | 24.5% |
| CSMD2     | 114784 | 34.9% | 17.5% | 21.1% | 24.5% |
| CD151     | 977    | 35.7% | 24.0% | 13.8% | 24.5% |
| KIAA0391  | 9692   | 17.6% | 19.8% | 36.1% | 24.5% |
| TULP4     | 56995  | 30.1% | 20.6% | 22.8% | 24.5% |
| TBC1D7    | 51256  | 26.8% | 21.4% | 25.3% | 24.5% |
| ITK       | 3702   | 17.1% | 27.6% | 28.8% | 24.5% |
| NPC2      | 10577  | 12.7% | 32.2% | 28.6% | 24.5% |

|              |        |       |       |       |       |
|--------------|--------|-------|-------|-------|-------|
| MRPL20       | 55052  | 18.9% | 26.1% | 28.5% | 24.5% |
| CACNA1G      | 8913   | 34.2% | 14.4% | 24.9% | 24.5% |
| TREM5        | 124599 | 30.0% | 21.3% | 22.2% | 24.5% |
| NSSATP13TP2  | 220323 | 27.9% | 14.1% | 31.5% | 24.5% |
| NAPG         | 8774   | 22.6% | 15.7% | 35.2% | 24.5% |
| DSCAM        | 1826   | 32.5% | 18.7% | 22.3% | 24.5% |
| STRAP        | 11171  | 21.4% | 18.2% | 34.0% | 24.5% |
| CXORF17      | 54954  | 24.8% | 17.3% | 31.4% | 24.5% |
| BTBD4        | 140685 | 25.9% | 15.9% | 31.7% | 24.5% |
| MAD2L1BP     | 9587   | 37.6% | 16.6% | 19.3% | 24.5% |
| GCL          | 64395  | 31.0% | 22.9% | 19.5% | 24.5% |
| SCRIB        | 23513  | 32.0% | 22.2% | 19.4% | 24.5% |
| CCR9         | 10803  | 30.7% | 16.3% | 26.5% | 24.5% |
| OR8K3        | 219473 | 28.9% | 30.5% | 14.1% | 24.5% |
| OR9G4        | 283189 | 33.1% | 18.0% | 22.3% | 24.5% |
| FLJ10330     | 55119  | 27.3% | 10.9% | 35.4% | 24.5% |
| EFNB2        | 1948   | 28.3% | 23.1% | 22.2% | 24.5% |
| HRC          | 3270   | 24.8% | 22.9% | 25.8% | 24.5% |
| STX8         | 9482   | 45.7% | 8.8%  | 19.0% | 24.5% |
| FANCB        | 2187   | 37.3% | 16.4% | 19.8% | 24.5% |
| CA14         | 23632  | 36.4% | 15.4% | 21.8% | 24.5% |
| FMNL1        | 752    | 27.6% | 17.9% | 28.0% | 24.5% |
| SLC5A4       | 6527   | 27.5% | 23.3% | 22.7% | 24.5% |
| TEK          | 7010   | 23.9% | 33.1% | 16.4% | 24.5% |
| AQP2         | 359    | 26.5% | 33.9% | 13.1% | 24.5% |
| LOC152831    | 152831 | 25.5% | 23.8% | 24.2% | 24.5% |
| PRDM1        | 639    | 30.4% | 19.4% | 23.8% | 24.5% |
| LOC284001    | 284001 | 23.7% | 20.0% | 29.9% | 24.5% |
| RFT1         | 91869  | 24.8% | 22.5% | 26.2% | 24.5% |
| DKFZP564J102 | 25854  | 29.5% | 16.2% | 27.9% | 24.5% |
| IL1RAPL2     | 26280  | 21.6% | 28.1% | 23.9% | 24.5% |
| RAB11-FIP2   | 22841  | 19.8% | 25.9% | 27.9% | 24.5% |
| ALX4         | 60529  | 23.0% | 31.9% | 18.6% | 24.5% |
| SDCCAG33     | 10194  | 25.8% | 6.5%  | 41.3% | 24.5% |
| NY-REN-58    | 51134  | 20.4% | 15.3% | 37.9% | 24.5% |
| ICAM2        | 3384   | 22.5% | 24.7% | 26.4% | 24.5% |
| ULK1         | 8408   | 23.2% | 30.1% | 20.2% | 24.5% |
| C8G          | 733    | 32.6% | 21.6% | 19.3% | 24.5% |
| CENTD2       | 116985 | 24.8% | 24.2% | 24.6% | 24.5% |
| DGCR6L       | 85359  | 28.2% | 19.2% | 26.2% | 24.5% |
| CAMSAP1      | 157922 | 29.1% | 14.6% | 29.8% | 24.5% |
| LOC643226    | 643226 | 31.5% | 21.1% | 21.0% | 24.5% |
| ZDHHC9       | 51114  | 44.3% | 11.0% | 18.3% | 24.5% |
| CACNA1D      | 776    | 25.0% | 26.7% | 21.9% | 24.5% |
| UNQ9438      | 387990 | 34.7% | 23.0% | 15.9% | 24.5% |
| MGC15677     | 84964  | 19.1% | 22.8% | 31.7% | 24.5% |
| MLNR         | 2862   | 32.0% | 23.6% | 18.0% | 24.5% |
| NDUF810      | 4716   | 30.1% | 18.9% | 24.6% | 24.5% |
| TBC1D17      | 79735  | 27.9% | 23.3% | 22.4% | 24.5% |
| LRFN2        | 57497  | 28.2% | 19.4% | 26.0% | 24.5% |
| IGFL2        | 147920 | 29.4% | 19.6% | 24.6% | 24.5% |
| IL1F6        | 27179  | 21.3% | 22.2% | 30.1% | 24.5% |
| C21ORF59     | 56683  | 24.4% | 22.7% | 26.4% | 24.5% |
| FLJ32894     | 144360 | 25.3% | 29.7% | 18.7% | 24.5% |
| MYPN         | 84665  | 25.7% | 24.4% | 23.5% | 24.5% |
| FGF12        | 2257   | 18.2% | 19.0% | 36.4% | 24.5% |
| MRPL51       | 51258  | 23.2% | 22.3% | 28.1% | 24.5% |
| MGC14560     | 51184  | 15.4% | 12.4% | 45.7% | 24.5% |
| KIF4A        | 24137  | 25.9% | 20.4% | 27.2% | 24.5% |
| ATG4B        | 23192  | 29.9% | 18.7% | 25.0% | 24.5% |
| ATP4B        | 496    | 38.5% | 12.4% | 22.7% | 24.5% |
| EPS8L2       | 64787  | 34.0% | 18.2% | 21.5% | 24.5% |
| SND1         | 27044  | 28.1% | 24.4% | 21.1% | 24.5% |
| GPR32        | 2854   | 21.6% | 25.1% | 26.9% | 24.5% |
| KPNA3        | 3839   | 40.7% | 14.1% | 18.8% | 24.5% |
| NAP5         | 344148 | 27.6% | 20.3% | 25.7% | 24.5% |
| PCDHB10      | 56126  | 28.9% | 24.2% | 20.5% | 24.5% |
| GPR1         | 2825   | 25.8% | 23.8% | 24.0% | 24.5% |
| MRPS27       | 23107  | 26.1% | 23.8% | 23.7% | 24.5% |
| MRPL21       | 219927 | 19.4% | 27.0% | 27.3% | 24.5% |
| DAOA         | 267012 | 27.4% | 26.5% | 19.8% | 24.5% |
| LOC440350    | 440350 | 28.2% | 18.5% | 26.9% | 24.5% |
| MAPRE1       | 22919  | 22.1% | 22.6% | 29.0% | 24.5% |
| SLC27A6      | 28965  | 35.2% | 15.5% | 23.0% | 24.5% |
| IRF2BP1      | 26145  | 27.1% | 21.5% | 25.0% | 24.5% |
| TSPAN14      | 81619  | 25.9% | 22.3% | 25.4% | 24.6% |
| SFRP4        | 6424   | 27.9% | 30.7% | 15.1% | 24.6% |
| SLC7A11      | 23657  | 29.5% | 21.4% | 22.7% | 24.6% |
| PLA2G12A     | 81579  | 33.5% | 12.7% | 27.5% | 24.6% |
| OPHN1        | 4983   | 24.1% | 25.5% | 24.1% | 24.6% |
| RPS6K1       | 26750  | 23.9% | 26.2% | 23.6% | 24.6% |
| NR2F6        | 2063   | 27.7% | 20.0% | 26.0% | 24.6% |
| OR6C1        | 390321 | 29.3% | 24.9% | 19.4% | 24.6% |
| FLJ46061     | 256949 | 21.9% | 29.0% | 22.8% | 24.6% |
| ABHD8        | 79575  | 26.6% | 23.3% | 23.8% | 24.6% |
| ORS2W1       | 120787 | 34.7% | 24.9% | 14.1% | 24.6% |
| PRDM11       | 56981  | 30.3% | 19.8% | 23.5% | 24.6% |
| HIAT1        | 64645  | 19.9% | 33.9% | 19.9% | 24.6% |
| LOC91464     | 91464  | 22.1% | 20.2% | 31.4% | 24.6% |
| MORF4        | 10934  | 23.6% | 28.1% | 22.0% | 24.6% |
| OCIA         | 54940  | 18.6% | 16.2% | 38.9% | 24.6% |
| KIAA1447     | 57597  | 18.3% | 26.9% | 28.5% | 24.6% |
| P4HA3        | 283208 | 31.6% | 14.6% | 27.5% | 24.6% |
| WHSC1L1      | 54904  | 29.2% | 21.3% | 23.2% | 24.6% |
| CARD6        | 84674  | 21.6% | 21.9% | 30.2% | 24.6% |
| C9ORF54      | 84895  | 22.1% | 17.5% | 34.1% | 24.6% |
| NT5M         | 56953  | 22.0% | 29.1% | 22.6% | 24.6% |
| LRDD         | 55367  | 19.7% | 26.5% | 27.5% | 24.6% |



|              |        |       |       |       |       |
|--------------|--------|-------|-------|-------|-------|
| RBM35B       | 80004  | 24.1% | 23.2% | 26.4% | 24.6% |
| MTSS1        | 9788   | 21.4% | 22.1% | 30.1% | 24.6% |
| FLJ32783     | 158787 | 21.8% | 27.6% | 24.3% | 24.6% |
| LOC390226    | 390226 | 27.6% | 18.0% | 28.1% | 24.6% |
| MGC2650      | 79090  | 16.9% | 26.4% | 30.4% | 24.6% |
| SLC26A11     | 284129 | 34.1% | 19.4% | 20.2% | 24.6% |
| GPR52        | 9293   | 30.2% | 23.9% | 19.7% | 24.6% |
| DKFZP7790175 | 374899 | 28.4% | 21.5% | 23.8% | 24.6% |
| ZNF273       | 10793  | 25.1% | 29.0% | 19.5% | 24.6% |
| TAL2         | 6887   | 33.7% | 18.6% | 21.4% | 24.6% |
| PTTG2        | 10744  | 25.2% | 24.2% | 24.4% | 24.6% |
| FCGR1A       | 2209   | 26.2% | 15.8% | 31.8% | 24.6% |
| MAP2K4       | 6416   | 23.7% | 27.2% | 22.8% | 24.6% |
| HOXC11       | 3227   | 29.5% | 17.5% | 26.7% | 24.6% |
| ZIM3         | 114026 | 27.6% | 19.9% | 26.2% | 24.6% |
| KIAA0664     | 23277  | 33.3% | 18.0% | 22.4% | 24.6% |
| UGT2B11      | 10720  | 28.4% | 22.7% | 22.7% | 24.6% |
| PDE4A        | 5141   | 29.7% | 17.7% | 26.3% | 24.6% |
| FAM49B       | 51571  | 33.8% | 14.5% | 25.4% | 24.6% |
| MGAT5        | 4249   | 32.9% | 17.9% | 22.9% | 24.6% |
| GCET2        | 257144 | 32.2% | 15.4% | 26.1% | 24.6% |
| MGC34761     | 283971 | 21.6% | 23.1% | 29.0% | 24.6% |
| CSPG4        | 1464   | 35.7% | 19.0% | 19.1% | 24.6% |
| ARG2         | 384    | 29.4% | 22.4% | 21.9% | 24.6% |
| DKFZP5660084 | 25979  | 31.7% | 21.7% | 20.3% | 24.6% |
| HLC-8        | 55028  | 27.3% | 14.5% | 31.9% | 24.6% |
| FLJ32569     | 148811 | 35.3% | 20.4% | 18.0% | 24.6% |
| MGC3036      | 65999  | 21.7% | 22.5% | 29.5% | 24.6% |
| CSTL1        | 128817 | 22.6% | 34.6% | 16.5% | 24.6% |
| RAB5B        | 5869   | 34.3% | 28.8% | 10.6% | 24.6% |
| LOC387758    | 387758 | 27.3% | 21.1% | 25.4% | 24.6% |
| HIF1A        | 3091   | 33.5% | 15.2% | 25.0% | 24.6% |
| LOC389072    | 389072 | 25.1% | 29.9% | 18.7% | 24.6% |
| LOC340602    | 340602 | 21.6% | 27.0% | 25.2% | 24.6% |
| FSHR         | 2492   | 25.7% | 22.3% | 25.8% | 24.6% |
| BBC3         | 27113  | 16.7% | 24.2% | 32.9% | 24.6% |
| CA10         | 56934  | 31.1% | 18.8% | 23.8% | 24.6% |
| KIAA1596     | 57697  | 21.1% | 25.5% | 27.1% | 24.6% |
| PPAPDC1      | 196051 | 28.2% | 30.9% | 14.6% | 24.6% |
| GUSB         | 2990   | 35.8% | 17.4% | 20.6% | 24.6% |
| SH3MD2       | 57630  | 29.9% | 19.9% | 23.9% | 24.6% |
| CABP2        | 51475  | 23.4% | 20.9% | 29.5% | 24.6% |
| TRIM46       | 80128  | 28.2% | 20.1% | 25.4% | 24.6% |
| ZNF175       | 7728   | 34.7% | 17.9% | 21.1% | 24.6% |
| FLJ22557     | 79768  | 22.5% | 27.0% | 24.3% | 24.6% |
| ZNF560       | 147741 | 34.8% | 22.7% | 16.3% | 24.6% |
| OR4D5        | 219875 | 32.4% | 20.3% | 21.1% | 24.6% |
| MAP3K11      | 4296   | 24.9% | 22.2% | 26.7% | 24.6% |
| NYD-SP21     | 84689  | 23.9% | 34.3% | 15.6% | 24.6% |
| MGC10540     | 84313  | 25.6% | 20.9% | 27.2% | 24.6% |
| DEF6         | 50619  | 20.9% | 22.2% | 30.7% | 24.6% |
| PDE4D        | 5144   | 31.2% | 20.7% | 21.9% | 24.6% |
| OR2AT4       | 341152 | 36.4% | 19.4% | 18.0% | 24.6% |
| ARMCX1       | 51309  | 14.5% | 18.7% | 40.6% | 24.6% |
| PCDHA7       | 56141  | 20.0% | 26.9% | 26.9% | 24.6% |
| PPFIA3       | 8541   | 23.2% | 29.5% | 21.1% | 24.6% |
| FLJ20847     | 55048  | 27.1% | 29.1% | 17.6% | 24.6% |
| CCL25        | 6370   | 30.0% | 24.3% | 19.5% | 24.6% |
| AMY1B        | 277    | 21.3% | 17.3% | 35.2% | 24.6% |
| YTHDF3       | 253943 | 23.0% | 21.7% | 29.2% | 24.6% |
| ARID3C       | 138715 | 40.5% | 13.8% | 19.5% | 24.6% |
| MYO5A        | 4644   | 25.7% | 25.1% | 23.1% | 24.6% |
| AHSA1        | 10598  | 32.7% | 21.0% | 20.2% | 24.6% |
| HOXB9        | 3219   | 28.7% | 17.0% | 28.2% | 24.6% |
| FLJ41131     | 284325 | 32.1% | 21.3% | 20.4% | 24.6% |
| SPANX-N5     | 494197 | 16.6% | 32.3% | 25.0% | 24.6% |
| HSD17B3      | 3293   | 22.9% | 24.8% | 26.2% | 24.6% |
| CLDN9        | 9080   | 18.3% | 23.2% | 32.4% | 24.6% |
| PIAS4        | 51588  | 37.3% | 15.6% | 21.0% | 24.6% |
| FOXM1        | 2305   | 33.5% | 21.1% | 19.3% | 24.6% |
| HCRTR2       | 3062   | 25.8% | 26.4% | 21.7% | 24.6% |
| RBMS2        | 5939   | 37.1% | 11.9% | 24.9% | 24.6% |
| FLJ10213     | 55096  | 28.0% | 21.5% | 24.3% | 24.6% |
| THTPA        | 79178  | 28.3% | 27.8% | 17.8% | 24.6% |
| SCDR10       | 374875 | 15.7% | 18.4% | 39.8% | 24.6% |
| FBXL3P       | 26223  | 33.0% | 15.3% | 25.6% | 24.6% |
| OCA2         | 4948   | 26.8% | 17.2% | 29.9% | 24.6% |
| PCDHGC4      | 56098  | 22.7% | 27.4% | 23.8% | 24.6% |
| MCF2L2       | 23101  | 42.3% | 12.3% | 19.3% | 24.6% |
| OCLM         | 10896  | 26.2% | 26.5% | 21.2% | 24.6% |
| APXL2        | 134549 | 19.6% | 19.5% | 34.8% | 24.6% |
| CAMK1D       | 57118  | 19.0% | 31.0% | 24.0% | 24.6% |
| ROBO3        | 64221  | 36.0% | 19.7% | 18.2% | 24.6% |
| MAPT         | 4137   | 33.3% | 11.1% | 29.5% | 24.6% |
| ENC1         | 8507   | 23.8% | 19.8% | 30.4% | 24.6% |
| C9ORF111     | 375775 | 37.3% | 13.5% | 23.1% | 24.6% |
| PTTG1IP      | 754    | 34.8% | 21.1% | 18.0% | 24.6% |
| CDKN2C       | 1031   | 29.5% | 21.5% | 22.9% | 24.6% |
| NFKBIL1      | 4795   | 32.2% | 12.3% | 29.4% | 24.6% |
| LOC255743    | 255743 | 28.4% | 24.7% | 20.9% | 24.6% |
| C10ORF45     | 83641  | 17.9% | 21.6% | 34.4% | 24.6% |
| FLJ31795     | 124808 | 23.9% | 18.1% | 32.0% | 24.6% |
| GPR111       | 222611 | 25.3% | 22.6% | 26.1% | 24.7% |
| GSDMDC1      | 79792  | 32.0% | 21.8% | 20.2% | 24.7% |
| MFN1         | 55669  | 31.5% | 23.2% | 19.2% | 24.7% |
| FBXW8        | 26259  | 32.5% | 18.1% | 23.4% | 24.7% |
| CASP4        | 837    | 35.7% | 25.5% | 12.8% | 24.7% |
| LOC727936    | 727936 | 23.5% | 21.3% | 29.1% | 24.7% |

|              |        |       |       |       |       |
|--------------|--------|-------|-------|-------|-------|
| HIST1H3A     | 8350   | 29.6% | 18.1% | 26.3% | 24.7% |
| PLCB1        | 23236  | 31.3% | 18.2% | 24.5% | 24.7% |
| DHRS4L2      | 317749 | 35.6% | 16.8% | 21.6% | 24.7% |
| SPAG1        | 6674   | 14.3% | 25.6% | 34.0% | 24.7% |
| KLRF1        | 51348  | 24.2% | 28.8% | 20.9% | 24.7% |
| C10ORF30     | 222389 | 37.1% | 17.9% | 18.9% | 24.7% |
| CXCL5        | 6374   | 37.9% | 21.5% | 14.5% | 24.7% |
| UNQ846       | 131920 | 23.7% | 19.2% | 31.1% | 24.7% |
| MEA          | 4201   | 27.5% | 12.6% | 33.8% | 24.7% |
| ZNF135       | 7694   | 35.0% | 19.2% | 19.8% | 24.7% |
| MATN3        | 4148   | 27.0% | 25.1% | 21.8% | 24.7% |
| BRS3         | 680    | 27.6% | 19.9% | 26.4% | 24.7% |
| ZNF26        | 7574   | 32.5% | 14.5% | 26.9% | 24.7% |
| TEX9         | 374618 | 23.1% | 22.5% | 28.4% | 24.7% |
| EMR2         | 30817  | 23.7% | 32.5% | 17.8% | 24.7% |
| ARL6IP4      | 51329  | 21.4% | 24.7% | 28.0% | 24.7% |
| MAPBP1P      | 28956  | 23.5% | 19.0% | 31.4% | 24.7% |
| MAPK9        | 5601   | 23.1% | 19.0% | 31.9% | 24.7% |
| IRF4         | 3662   | 32.4% | 18.3% | 23.3% | 24.7% |
| DDX6         | 1656   | 30.6% | 22.3% | 21.1% | 24.7% |
| CRB2         | 286204 | 25.5% | 18.3% | 30.2% | 24.7% |
| FLJ10986     | 55277  | 25.7% | 28.1% | 20.3% | 24.7% |
| SLC25A27     | 9481   | 30.0% | 22.0% | 21.9% | 24.7% |
| MPEG1        | 219972 | 31.4% | 19.2% | 23.4% | 24.7% |
| LOC146822    | 146822 | 19.2% | 23.9% | 31.0% | 24.7% |
| C20ORF4      | 25980  | 25.7% | 32.1% | 16.2% | 24.7% |
| PGA5         | 5222   | 26.5% | 28.0% | 19.5% | 24.7% |
| LOC317671    | 317671 | 21.1% | 28.0% | 25.0% | 24.7% |
| ACTR2        | 10097  | 26.3% | 16.0% | 31.7% | 24.7% |
| LY64         | 4064   | 23.6% | 13.4% | 37.0% | 24.7% |
| MMP23B       | 8510   | 29.9% | 20.6% | 23.6% | 24.7% |
| FIGF         | 2277   | 29.7% | 23.7% | 20.6% | 24.7% |
| GP1BA        | 2811   | 37.7% | 15.8% | 20.6% | 24.7% |
| LOC283537    | 283537 | 23.0% | 23.0% | 28.0% | 24.7% |
| FLJ14103     | 79742  | 19.4% | 17.6% | 37.1% | 24.7% |
| LOC343521    | 343521 | 17.2% | 19.8% | 37.1% | 24.7% |
| PSCD3        | 9265   | 32.6% | 21.7% | 19.7% | 24.7% |
| PRY          | 9081   | 38.8% | 12.8% | 22.5% | 24.7% |
| SHC3         | 53358  | 21.6% | 22.9% | 29.5% | 24.7% |
| EIF4EBP1     | 1978   | 25.0% | 29.8% | 19.3% | 24.7% |
| DSCR9        | 257203 | 16.9% | 27.1% | 30.0% | 24.7% |
| OR10J3       | 441911 | 17.6% | 23.1% | 33.3% | 24.7% |
| NROB1        | 190    | 21.4% | 20.0% | 32.7% | 24.7% |
| ABHD5        | 51099  | 29.7% | 18.3% | 26.1% | 24.7% |
| DTX2         | 113878 | 34.2% | 19.7% | 20.2% | 24.7% |
| TNS          | 7145   | 21.1% | 21.7% | 31.3% | 24.7% |
| LOC352909    | 352909 | 19.0% | 18.3% | 36.8% | 24.7% |
| VAV3         | 10451  | 36.5% | 16.3% | 21.3% | 24.7% |
| DNAJC11      | 55735  | 20.4% | 19.6% | 34.1% | 24.7% |
| KIAA1754L    | 150771 | 33.0% | 10.9% | 30.2% | 24.7% |
| SPAG7        | 9552   | 24.3% | 15.6% | 34.1% | 24.7% |
| GABPB2       | 2553   | 28.5% | 19.1% | 26.5% | 24.7% |
| PIRS1        | 10635  | 19.8% | 26.6% | 27.7% | 24.7% |
| FLJ25439     | 153657 | 30.1% | 16.2% | 27.7% | 24.7% |
| PYC1         | 260434 | 35.7% | 15.1% | 23.3% | 24.7% |
| TTC10        | 8100   | 24.6% | 11.0% | 38.5% | 24.7% |
| LOC90668     | 90668  | 30.8% | 14.3% | 29.0% | 24.7% |
| TXNL1        | 9352   | 42.7% | 10.5% | 20.9% | 24.7% |
| GZMH         | 2999   | 32.6% | 20.5% | 21.0% | 24.7% |
| SAT2         | 112483 | 27.9% | 28.5% | 17.7% | 24.7% |
| HEMGN        | 55363  | 35.7% | 22.4% | 16.0% | 24.7% |
| ATOH7        | 220202 | 30.9% | 16.7% | 26.5% | 24.7% |
| DCPS         | 28960  | 27.8% | 13.8% | 32.4% | 24.7% |
| SCRN3        | 79634  | 21.4% | 24.3% | 28.3% | 24.7% |
| RAB33A       | 9363   | 32.1% | 14.6% | 27.4% | 24.7% |
| FLJ20277     | 55624  | 23.4% | 14.6% | 36.1% | 24.7% |
| TIGD7        | 91151  | 24.2% | 23.6% | 26.3% | 24.7% |
| TMEFF1       | 8577   | 32.7% | 19.8% | 21.6% | 24.7% |
| D6S2654E     | 26240  | 18.7% | 15.5% | 39.9% | 24.7% |
| CYR61        | 3491   | 35.4% | 17.7% | 21.0% | 24.7% |
| C6ORF188     | 254228 | 27.6% | 18.5% | 28.1% | 24.7% |
| CAV1         | 857    | 32.2% | 26.1% | 15.8% | 24.7% |
| JTV1         | 7965   | 28.4% | 24.6% | 21.2% | 24.7% |
| DKFZP547C176 | 55531  | 25.6% | 15.8% | 32.8% | 24.7% |
| C10ORF91     | 170393 | 30.1% | 16.4% | 27.7% | 24.7% |
| LOC646480    | 646480 | 27.3% | 13.2% | 33.7% | 24.7% |
| GSTA4        | 2941   | 29.5% | 19.9% | 24.8% | 24.7% |
| UPF3B        | 65109  | 20.3% | 25.6% | 28.3% | 24.7% |
| GNRH1        | 2796   | 23.8% | 25.8% | 24.6% | 24.7% |
| DHCR24       | 1718   | 38.3% | 17.7% | 18.1% | 24.7% |
| DKC1         | 1736   | 23.3% | 19.6% | 31.3% | 24.7% |
| CES1         | 1066   | 22.0% | 25.7% | 26.5% | 24.7% |
| KLK9         | 284366 | 28.7% | 21.0% | 24.5% | 24.7% |
| CGI-01       | 51603  | 26.6% | 25.7% | 21.8% | 24.7% |
| LOC400746    | 400746 | 23.5% | 19.3% | 31.4% | 24.7% |
| OR4A47       | 403253 | 25.0% | 21.7% | 27.5% | 24.7% |
| PPP1R1C      | 151242 | 28.4% | 27.4% | 18.4% | 24.7% |
| DERL2        | 51009  | 27.4% | 18.8% | 28.0% | 24.7% |
| KRT2A        | 3849   | 28.7% | 24.3% | 21.2% | 24.7% |
| CTS2         | 1515   | 31.6% | 22.0% | 20.5% | 24.7% |
| MGC46719     | 128077 | 20.1% | 16.5% | 37.7% | 24.7% |
| CGI-63       | 51102  | 27.3% | 21.4% | 25.5% | 24.7% |
| QTRT1        | 81890  | 31.7% | 16.9% | 25.5% | 24.7% |
| ZDHH22       | 283576 | 35.4% | 19.6% | 19.2% | 24.7% |
| FLG          | 2312   | 24.8% | 25.6% | 23.8% | 24.7% |
| MGC23918     | 151903 | 15.1% | 22.6% | 36.5% | 24.7% |
| VSIG1        | 340547 | 31.4% | 27.3% | 15.6% | 24.7% |
| EDEM1        | 9695   | 31.8% | 23.2% | 19.1% | 24.7% |

|               |        |       |       |       |       |
|---------------|--------|-------|-------|-------|-------|
| KLPH          | 197021 | 35.3% | 17.4% | 21.4% | 24.7% |
| AKAP11        | 11215  | 33.7% | 21.5% | 19.0% | 24.7% |
| TBL1XR1       | 79718  | 26.2% | 14.3% | 33.7% | 24.7% |
| GCSH          | 2653   | 39.6% | 13.4% | 21.3% | 24.7% |
| THSD1         | 55901  | 23.0% | 23.8% | 27.5% | 24.7% |
| SLC22A11      | 55867  | 36.1% | 13.0% | 25.1% | 24.7% |
| LOC219527     | 219527 | 22.3% | 19.0% | 32.9% | 24.7% |
| LOC389118     | 389118 | 26.6% | 27.0% | 20.7% | 24.7% |
| MYH7B         | 57644  | 25.2% | 20.1% | 28.9% | 24.7% |
| CLK2          | 1196   | 23.1% | 26.1% | 25.0% | 24.7% |
| VCY           | 9084   | 18.8% | 25.5% | 30.0% | 24.7% |
| MGC34713      | 285600 | 26.6% | 9.8%  | 37.8% | 24.7% |
| C10ORF56      | 219654 | 18.7% | 25.7% | 29.8% | 24.7% |
| TNP1          | 7141   | 35.0% | 9.0%  | 30.2% | 24.7% |
| OSAP          | 84709  | 26.7% | 26.3% | 21.2% | 24.7% |
| FLJ36888      | 126526 | 32.7% | 18.6% | 23.0% | 24.7% |
| HOXD3         | 3232   | 23.1% | 26.8% | 24.3% | 24.7% |
| CCL15         | 6359   | 23.7% | 23.2% | 27.4% | 24.7% |
| KIAA1268      | 54625  | 40.5% | 15.8% | 18.0% | 24.7% |
| AZLD1         | 87769  | 20.6% | 23.8% | 29.8% | 24.7% |
| KRTAP12-2     | 353323 | 39.4% | 18.2% | 16.7% | 24.7% |
| ASB4          | 51666  | 31.9% | 16.1% | 26.3% | 24.7% |
| BTRC          | 8945   | 29.4% | 19.7% | 25.1% | 24.7% |
| HOOK3         | 84376  | 29.9% | 20.9% | 23.5% | 24.7% |
| KENAE         | 202243 | 26.6% | 19.5% | 28.2% | 24.7% |
| SMN2          | 6607   | 25.4% | 27.1% | 21.8% | 24.8% |
| PRPS11        | 221823 | 22.4% | 28.6% | 23.2% | 24.8% |
| RBBP5         | 5929   | 30.1% | 29.2% | 14.9% | 24.8% |
| SLC16A12      | 387700 | 28.3% | 16.1% | 29.8% | 24.8% |
| HERC5         | 51191  | 27.4% | 15.9% | 31.0% | 24.8% |
| OR2T35        | 403244 | 30.5% | 12.5% | 31.3% | 24.8% |
| ME3           | 10873  | 24.2% | 22.9% | 27.2% | 24.8% |
| KLHL8         | 57563  | 25.1% | 20.4% | 28.7% | 24.8% |
| DKFZP56400523 | 84060  | 36.3% | 16.1% | 21.9% | 24.8% |
| LOC389852     | 389852 | 23.3% | 23.8% | 27.2% | 24.8% |
| MCM8          | 84515  | 39.7% | 15.3% | 19.2% | 24.8% |
| TSPY1         | 7258   | 35.3% | 16.7% | 22.3% | 24.8% |
| HLA-B         | 3106   | 30.2% | 18.3% | 25.7% | 24.8% |
| SLITRK5       | 26050  | 19.0% | 18.4% | 36.9% | 24.8% |
| ORSP3         | 120066 | 24.3% | 23.3% | 26.7% | 24.8% |
| DKFZP727A071  | 25973  | 20.7% | 22.7% | 30.9% | 24.8% |
| LOC646627     | 646627 | 10.3% | 29.9% | 34.0% | 24.8% |
| MCLC          | 23155  | 30.4% | 22.0% | 21.9% | 24.8% |
| COL8A2        | 1296   | 36.4% | 15.6% | 22.2% | 24.8% |
| ZNF268        | 10795  | 28.3% | 21.5% | 24.5% | 24.8% |
| FBN1          | 2200   | 27.7% | 20.7% | 25.9% | 24.8% |
| FLJ10378      | 55132  | 26.7% | 19.8% | 27.8% | 24.8% |
| PRICKLE1      | 144165 | 23.1% | 30.2% | 21.0% | 24.8% |
| HSPC138       | 51501  | 16.7% | 22.8% | 34.8% | 24.8% |
| ATPIF1        | 93974  | 29.4% | 15.8% | 29.1% | 24.8% |
| RANBP3        | 8498   | 31.0% | 25.5% | 17.7% | 24.8% |
| SELK          | 58515  | 36.5% | 13.5% | 24.3% | 24.8% |
| LOC148206     | 148206 | 32.1% | 13.3% | 28.9% | 24.8% |
| DGAT2         | 84649  | 28.9% | 17.6% | 27.8% | 24.8% |
| FLJ30525      | 113802 | 17.2% | 32.5% | 24.7% | 24.8% |
| CEBPD         | 1052   | 26.8% | 31.5% | 16.0% | 24.8% |
| CCND2         | 894    | 26.1% | 17.2% | 31.1% | 24.8% |
| CDH4          | 1002   | 29.1% | 22.9% | 22.3% | 24.8% |
| FLJ32112      | 127428 | 27.8% | 18.8% | 27.8% | 24.8% |
| SLC9A9        | 285195 | 26.7% | 24.8% | 22.8% | 24.8% |
| GOLT1B        | 51026  | 26.1% | 21.9% | 26.3% | 24.8% |
| ADAM10        | 102    | 33.0% | 23.0% | 18.3% | 24.8% |
| NTN1          | 9423   | 29.8% | 16.1% | 28.5% | 24.8% |
| FLJ45645      | 375287 | 23.1% | 15.3% | 35.9% | 24.8% |
| POLR3H        | 171568 | 35.0% | 15.7% | 23.6% | 24.8% |
| GYS2          | 2998   | 21.6% | 15.6% | 37.1% | 24.8% |
| NEXN          | 91624  | 28.9% | 26.4% | 19.0% | 24.8% |
| MTF           | 94033  | 27.6% | 18.2% | 28.6% | 24.8% |
| RNF14         | 9604   | 31.1% | 17.9% | 25.4% | 24.8% |
| LOC115861     | 115861 | 30.3% | 18.0% | 26.0% | 24.8% |
| FUSSEL18      | 652991 | 33.8% | 13.9% | 26.7% | 24.8% |
| CSS3          | 337876 | 52.0% | 4.4%  | 17.9% | 24.8% |
| LYK5          | 92335  | 17.4% | 26.9% | 30.0% | 24.8% |
| LOC203076     | 203076 | 26.3% | 29.6% | 18.4% | 24.8% |
| ACSL6         | 23305  | 38.3% | 15.8% | 20.3% | 24.8% |
| SRCRB4D       | 136853 | 28.8% | 23.0% | 22.6% | 24.8% |
| SEMA4D        | 10507  | 18.6% | 21.6% | 34.2% | 24.8% |
| ESRRA         | 2101   | 29.2% | 16.5% | 28.7% | 24.8% |
| KIAA1679      | 80731  | 19.7% | 22.1% | 32.6% | 24.8% |
| NLGN2         | 57555  | 32.8% | 19.0% | 22.6% | 24.8% |
| MGC14327      | 94107  | 26.5% | 16.6% | 31.4% | 24.8% |
| LAMA5         | 3911   | 32.7% | 15.7% | 25.9% | 24.8% |
| THAP1         | 55145  | 28.6% | 20.3% | 25.5% | 24.8% |
| ALMS1         | 7840   | 38.6% | 22.7% | 13.1% | 24.8% |
| FLJ34633      | 126695 | 28.2% | 19.0% | 27.2% | 24.8% |
| DDI1          | 414301 | 12.5% | 31.0% | 31.0% | 24.8% |
| EXOSC2        | 23404  | 35.4% | 21.7% | 17.3% | 24.8% |
| ARL10C        | 55207  | 22.3% | 17.9% | 34.2% | 24.8% |
| FLJ30834      | 132332 | 25.4% | 17.3% | 31.7% | 24.8% |
| SLC30A9       | 10463  | 23.1% | 19.5% | 31.8% | 24.8% |
| ATM           | 472    | 31.5% | 19.4% | 23.5% | 24.8% |
| NMB           | 4828   | 31.9% | 18.2% | 24.3% | 24.8% |
| ZNF10         | 7556   | 33.1% | 29.5% | 11.8% | 24.8% |
| USP5          | 8078   | 31.4% | 25.6% | 17.4% | 24.8% |
| MINK          | 50488  | 25.4% | 25.5% | 23.6% | 24.8% |
| ACTR6         | 64431  | 14.5% | 31.1% | 28.8% | 24.8% |
| PRSS1         | 5644   | 30.9% | 24.1% | 19.4% | 24.8% |
| TNRC9         | 27324  | 18.2% | 21.4% | 34.8% | 24.8% |

|               |        |       |       |       |       |
|---------------|--------|-------|-------|-------|-------|
| GSK3A         | 2931   | 27.4% | 24.1% | 22.9% | 24.8% |
| HTO36         | 81888  | 33.7% | 14.8% | 26.0% | 24.8% |
| DNAH6         | 1768   | 29.5% | 20.8% | 24.1% | 24.8% |
| UPK2          | 7379   | 28.3% | 25.6% | 20.5% | 24.8% |
| LOC340168     | 340168 | 29.5% | 18.3% | 26.7% | 24.8% |
| AASS          | 10157  | 24.2% | 29.2% | 21.0% | 24.8% |
| SRP14         | 6727   | 35.3% | 18.2% | 21.0% | 24.8% |
| FLJ12587      | 64410  | 24.8% | 24.5% | 25.1% | 24.8% |
| FLJ20265      | 54872  | 29.4% | 14.5% | 30.5% | 24.8% |
| FKBP11        | 51303  | 31.9% | 14.5% | 28.0% | 24.8% |
| CCR2          | 1231   | 26.6% | 20.6% | 27.2% | 24.8% |
| FLJ32942      | 121355 | 28.2% | 17.7% | 28.6% | 24.8% |
| OR10G3        | 26533  | 35.2% | 17.6% | 21.6% | 24.8% |
| CRSP3         | 9439   | 24.4% | 20.6% | 29.5% | 24.8% |
| LOC343413     | 343413 | 26.5% | 11.6% | 36.4% | 24.8% |
| PPFIBP2       | 8495   | 23.4% | 27.8% | 23.3% | 24.8% |
| LOC284739     | 284739 | 30.3% | 21.6% | 22.6% | 24.8% |
| SLIC1         | 124460 | 31.0% | 16.2% | 27.3% | 24.8% |
| TNFAIP2       | 7127   | 34.9% | 18.1% | 21.4% | 24.8% |
| RAB11-FIP4    | 84440  | 27.5% | 20.2% | 26.9% | 24.8% |
| SSA1          | 6737   | 33.7% | 17.1% | 23.7% | 24.8% |
| SLC15A1       | 6564   | 25.5% | 25.2% | 23.8% | 24.8% |
| KIAA1404      | 57169  | 35.3% | 15.1% | 24.0% | 24.8% |
| FLJ20716      | 55026  | 25.5% | 16.5% | 32.5% | 24.8% |
| AHRR          | 57491  | 30.6% | 24.7% | 19.2% | 24.8% |
| MGC13040      | 85016  | 26.5% | 18.6% | 29.3% | 24.8% |
| DNCL1         | 8655   | 25.1% | 27.6% | 21.8% | 24.8% |
| AADAT         | 51166  | 16.9% | 28.1% | 29.5% | 24.8% |
| LIMK1         | 3984   | 19.5% | 23.3% | 31.7% | 24.8% |
| KIAA1970      | 124454 | 15.4% | 19.3% | 39.8% | 24.8% |
| DSCR10        | 259234 | 18.8% | 19.3% | 36.4% | 24.8% |
| LOC285331     | 285331 | 24.6% | 17.8% | 32.1% | 24.8% |
| TAS2R49       | 259295 | 28.1% | 17.1% | 29.3% | 24.8% |
| SLC25A11      | 8402   | 27.3% | 37.3% | 10.0% | 24.8% |
| FLJ43505      | 400823 | 36.8% | 19.5% | 18.3% | 24.8% |
| YWHAB         | 7529   | 22.2% | 16.2% | 36.2% | 24.8% |
| OAZIN         | 51582  | 26.1% | 27.3% | 21.1% | 24.8% |
| FLJ12892      | 64770  | 23.3% | 26.7% | 24.6% | 24.8% |
| KIAA1171      | 57465  | 26.7% | 13.0% | 34.9% | 24.8% |
| LOC203547     | 203547 | 32.4% | 14.4% | 27.7% | 24.8% |
| MGC17301      | 196410 | 16.0% | 27.7% | 30.8% | 24.8% |
| KRT20         | 54474  | 27.4% | 21.1% | 26.1% | 24.8% |
| FLJ32416      | 126306 | 18.8% | 21.2% | 34.6% | 24.8% |
| GAN           | 8139   | 28.9% | 24.4% | 21.3% | 24.8% |
| ZNF385        | 25946  | 25.4% | 27.8% | 21.4% | 24.9% |
| SLC41A1       | 254428 | 30.4% | 18.6% | 25.5% | 24.9% |
| DKFZP686L1814 | 132660 | 16.7% | 26.3% | 31.6% | 24.9% |
| CDK2AP1       | 8099   | 37.7% | 10.3% | 26.5% | 24.9% |
| CUZD1         | 50624  | 32.5% | 19.8% | 22.3% | 24.9% |
| PIM1          | 5292   | 24.3% | 26.7% | 23.6% | 24.9% |
| TAS2R3        | 50831  | 29.7% | 19.9% | 24.9% | 24.9% |
| RP1L1         | 94137  | 32.3% | 21.0% | 21.3% | 24.9% |
| CNOT7         | 29883  | 27.1% | 24.2% | 23.3% | 24.9% |
| TRIM8         | 81603  | 32.0% | 22.1% | 20.5% | 24.9% |
| C13ORF6       | 84945  | 30.0% | 22.8% | 21.8% | 24.9% |
| TOB1          | 10140  | 30.5% | 24.2% | 19.9% | 24.9% |
| PIP3-E        | 26034  | 29.0% | 21.3% | 24.2% | 24.9% |
| SH3BGR        | 6450   | 34.5% | 12.6% | 27.5% | 24.9% |
| NDUF82        | 4708   | 27.4% | 15.7% | 31.5% | 24.9% |
| DUSP3         | 1845   | 27.7% | 30.9% | 16.0% | 24.9% |
| ZNF526        | 116115 | 21.6% | 32.1% | 20.9% | 24.9% |
| CRB3          | 92359  | 39.2% | 19.4% | 16.0% | 24.9% |
| FLJ38753      | 127707 | 23.8% | 18.0% | 32.7% | 24.9% |
| SLC4A3        | 6508   | 34.3% | 19.8% | 20.6% | 24.9% |
| TETTRAN       | 10227  | 25.0% | 26.4% | 23.2% | 24.9% |
| FLJ90709      | 153129 | 22.4% | 27.9% | 24.3% | 24.9% |
| LGP1          | 84514  | 23.5% | 21.3% | 29.8% | 24.9% |
| GPR124        | 25960  | 25.5% | 30.0% | 19.1% | 24.9% |
| ZNF585B       | 92285  | 32.5% | 18.4% | 23.7% | 24.9% |
| ANKRD20A2     | 441430 | 34.5% | 20.8% | 19.3% | 24.9% |
| PRKAG1        | 5571   | 22.2% | 22.7% | 29.7% | 24.9% |
| TMED5         | 50999  | 28.8% | 27.6% | 18.2% | 24.9% |
| PPP4R1        | 9989   | 33.3% | 16.9% | 24.4% | 24.9% |
| PCBP4         | 57060  | 28.1% | 20.0% | 26.5% | 24.9% |
| PITX1         | 5307   | 36.7% | 21.3% | 16.6% | 24.9% |
| LOC120237     | 120237 | 25.3% | 22.1% | 27.3% | 24.9% |
| DKFZP761D221  | 84251  | 17.8% | 15.3% | 41.5% | 24.9% |
| C18ORF34      | 374864 | 20.8% | 26.5% | 27.4% | 24.9% |
| RAB7          | 7879   | 36.2% | 22.5% | 16.0% | 24.9% |
| HSD17B12      | 51144  | 31.7% | 18.8% | 24.2% | 24.9% |
| GGPS1         | 9453   | 22.1% | 23.1% | 29.5% | 24.9% |
| SCRN1         | 9805   | 30.3% | 26.6% | 17.7% | 24.9% |
| LOC284307     | 284307 | 27.9% | 14.7% | 32.1% | 24.9% |
| GABRA1        | 2554   | 30.9% | 14.9% | 28.9% | 24.9% |
| CHI3L2        | 1117   | 24.5% | 21.8% | 28.4% | 24.9% |
| KIAA1407      | 57577  | 34.8% | 17.8% | 22.1% | 24.9% |
| ABT1          | 29777  | 31.4% | 17.9% | 25.3% | 24.9% |
| KBTBD6        | 89890  | 24.9% | 21.2% | 28.6% | 24.9% |
| FLJ37964      | 284486 | 24.2% | 27.2% | 23.2% | 24.9% |
| CYP27B1       | 1594   | 19.4% | 31.5% | 23.9% | 24.9% |
| DAZAP1        | 26528  | 29.5% | 17.6% | 27.6% | 24.9% |
| FLJ16008      | 339761 | 30.3% | 16.7% | 27.7% | 24.9% |
| WAC           | 51322  | 15.9% | 29.5% | 29.3% | 24.9% |
| TRAG3         | 9598   | 14.1% | 25.7% | 34.9% | 24.9% |
| DEPDC6        | 64798  | 21.5% | 27.6% | 25.5% | 24.9% |
| PTPRB         | 5787   | 27.1% | 24.3% | 23.3% | 24.9% |
| UBE1L         | 7318   | 30.2% | 20.1% | 24.4% | 24.9% |
| LMOD3         | 56203  | 34.4% | 20.8% | 19.5% | 24.9% |

|               |        |       |       |       |       |
|---------------|--------|-------|-------|-------|-------|
| PAPPA2        | 60676  | 26.3% | 25.5% | 22.9% | 24.9% |
| ADAM2         | 2515   | 25.8% | 27.9% | 21.0% | 24.9% |
| NUP98         | 4928   | 39.6% | 12.9% | 22.1% | 24.9% |
| PRKAR2A       | 5576   | 20.3% | 28.9% | 25.5% | 24.9% |
| TCFL1         | 6944   | 19.4% | 22.2% | 33.1% | 24.9% |
| GPR172B       | 55065  | 21.7% | 25.0% | 28.0% | 24.9% |
| PAMCI         | 9182   | 25.4% | 18.1% | 31.3% | 24.9% |
| DRG2          | 1819   | 30.5% | 17.2% | 27.0% | 24.9% |
| DIABLO        | 56616  | 36.7% | 15.0% | 22.9% | 24.9% |
| KIAA1967      | 57805  | 26.6% | 30.5% | 17.6% | 24.9% |
| SDFR1         | 27020  | 38.8% | 16.2% | 19.7% | 24.9% |
| VNN1          | 8876   | 42.6% | 15.0% | 17.2% | 24.9% |
| CDC42EP4      | 23580  | 30.4% | 21.1% | 23.2% | 24.9% |
| FRS3          | 10817  | 34.6% | 13.3% | 26.8% | 24.9% |
| C6ORF74       | 51020  | 37.0% | 14.7% | 23.0% | 24.9% |
| PARVB         | 29780  | 30.5% | 23.8% | 20.4% | 24.9% |
| MTR           | 4548   | 35.6% | 17.4% | 21.8% | 24.9% |
| FUT11         | 170384 | 32.3% | 21.4% | 21.1% | 24.9% |
| PPIL2         | 23759  | 29.2% | 24.6% | 20.9% | 24.9% |
| BAG1          | 573    | 27.8% | 23.2% | 23.8% | 24.9% |
| IQCB1         | 9657   | 22.2% | 24.7% | 27.9% | 24.9% |
| FLJ10891      | 55762  | 21.8% | 31.1% | 21.9% | 24.9% |
| PTMA          | 5757   | 32.2% | 19.6% | 23.0% | 24.9% |
| PRAF2         | 11230  | 27.5% | 25.0% | 22.3% | 24.9% |
| PNUTL1        | 5413   | 31.5% | 14.8% | 28.5% | 24.9% |
| DUOX1         | 53905  | 27.3% | 18.7% | 28.8% | 24.9% |
| PEL12         | 57161  | 20.7% | 27.0% | 27.1% | 24.9% |
| SRMS          | 6725   | 22.1% | 23.7% | 29.0% | 24.9% |
| IL23R         | 149233 | 34.5% | 14.9% | 25.4% | 24.9% |
| WBSCR24       | 155382 | 34.8% | 16.1% | 23.8% | 24.9% |
| SNRPN         | 6638   | 24.7% | 25.8% | 24.3% | 24.9% |
| KIAA1194      | 57472  | 32.8% | 18.0% | 23.9% | 24.9% |
| UNQ541        | 389376 | 30.3% | 14.9% | 29.6% | 24.9% |
| ZNF99         | 7652   | 29.2% | 27.2% | 18.4% | 24.9% |
| DKFZP547B1713 | 128061 | 28.7% | 16.3% | 29.8% | 24.9% |
| HNRNPA3       | 220988 | 22.8% | 13.6% | 38.4% | 24.9% |
| DDX10         | 1662   | 33.7% | 13.5% | 27.6% | 24.9% |
| YTHDF2        | 51441  | 30.9% | 21.2% | 22.7% | 24.9% |
| FOXP1         | 27086  | 37.7% | 12.7% | 24.4% | 24.9% |
| SPATS1        | 221409 | 21.5% | 23.6% | 29.6% | 24.9% |
| HDAC11        | 79885  | 34.6% | 21.0% | 19.2% | 24.9% |
| ITPR1         | 3708   | 31.2% | 18.3% | 25.2% | 24.9% |
| SEN2          | 59343  | 40.5% | 10.2% | 24.1% | 24.9% |
| DQX1          | 165545 | 29.7% | 18.8% | 26.3% | 24.9% |
| C6ORF130      | 221443 | 22.4% | 21.8% | 30.6% | 24.9% |
| LOC115509     | 115509 | 32.5% | 16.5% | 25.8% | 24.9% |
| CDC20         | 991    | 31.9% | 18.6% | 24.2% | 24.9% |
| ADAM32        | 203102 | 29.0% | 30.8% | 15.0% | 24.9% |
| LOC374569     | 374569 | 32.4% | 21.8% | 20.6% | 24.9% |
| CDH7          | 1005   | 32.0% | 19.1% | 23.7% | 24.9% |
| MGC16664      | 148753 | 22.1% | 26.7% | 26.0% | 24.9% |
| TSPYL4        | 23270  | 30.9% | 18.6% | 25.4% | 24.9% |
| C18ORF14      | 79839  | 19.9% | 26.8% | 28.1% | 24.9% |
| ACAA2         | 10449  | 29.9% | 18.4% | 26.6% | 24.9% |
| ZNF358        | 140467 | 31.3% | 17.7% | 25.9% | 24.9% |
| UNC5B         | 219699 | 27.8% | 18.8% | 28.2% | 24.9% |
| KRTAP4-7      | 85287  | 35.7% | 13.4% | 25.7% | 24.9% |
| MYO1F         | 4542   | 29.8% | 18.3% | 26.7% | 24.9% |
| CYP3A4        | 1576   | 26.9% | 20.7% | 27.3% | 24.9% |
| TRRAP         | 8295   | 34.8% | 15.3% | 24.8% | 24.9% |
| K5B           | 196374 | 23.5% | 28.5% | 22.8% | 24.9% |
| C21ORF127     | 29104  | 35.3% | 20.4% | 19.1% | 24.9% |
| CYP2R1        | 120227 | 28.9% | 22.8% | 23.2% | 24.9% |
| OR4S1         | 256148 | 25.5% | 23.1% | 26.2% | 24.9% |
| MPN2          | 339501 | 26.2% | 25.4% | 23.3% | 24.9% |
| FLJ10719      | 55215  | 26.1% | 17.7% | 31.0% | 24.9% |
| PCDH8         | 5100   | 37.1% | 19.2% | 18.6% | 24.9% |
| APPL          | 26060  | 21.4% | 16.6% | 36.9% | 24.9% |
| FOSB          | 2354   | 31.1% | 16.9% | 26.8% | 24.9% |
| THAP11        | 57215  | 25.4% | 26.6% | 22.8% | 24.9% |
| ECEL1         | 9427   | 23.0% | 22.0% | 29.9% | 24.9% |
| SDCCAG1       | 9147   | 34.5% | 23.0% | 17.4% | 24.9% |
| TCEA1         | 6917   | 33.7% | 21.1% | 20.1% | 24.9% |
| C6ORF48       | 50854  | 24.4% | 15.3% | 35.1% | 24.9% |
| C11ORF17      | 56672  | 26.1% | 22.1% | 26.7% | 24.9% |
| SLCO5A1       | 81796  | 38.2% | 11.0% | 25.6% | 24.9% |
| LOC203522     | 203522 | 23.9% | 19.0% | 31.9% | 24.9% |
| BFAR          | 51283  | 27.0% | 26.1% | 21.8% | 24.9% |
| UNG           | 7374   | 30.1% | 19.3% | 25.5% | 25.0% |
| DSTN          | 11034  | 29.8% | 14.1% | 31.0% | 25.0% |
| CABP1         | 9478   | 23.8% | 21.3% | 29.8% | 25.0% |
| AFAR3         | 246181 | 35.6% | 17.4% | 21.9% | 25.0% |
| FLJ90650      | 206338 | 26.1% | 31.3% | 17.4% | 25.0% |
| C14ORF149     | 112849 | 19.6% | 22.4% | 32.8% | 25.0% |
| CDC47L        | 55536  | 28.7% | 14.1% | 32.1% | 25.0% |
| NEUROD4       | 58158  | 31.6% | 21.7% | 21.6% | 25.0% |
| VAMP4         | 8674   | 33.6% | 22.8% | 18.4% | 25.0% |
| B4GALT4       | 8702   | 31.5% | 20.6% | 22.8% | 25.0% |
| PUSL1         | 126789 | 29.1% | 21.0% | 24.9% | 25.0% |
| LILRB2        | 10288  | 34.8% | 26.2% | 13.8% | 25.0% |
| FLJ45079      | 400624 | 26.3% | 25.5% | 23.1% | 25.0% |
| BRIP1         | 83990  | 33.9% | 12.1% | 28.9% | 25.0% |
| C6orf120      | 387263 | 29.0% | 20.3% | 25.7% | 25.0% |
| APITD1        | 378708 | 17.3% | 30.0% | 27.6% | 25.0% |
| C22ORF2       | 25776  | 25.0% | 17.8% | 32.1% | 25.0% |
| NID           | 4811   | 17.8% | 17.5% | 39.5% | 25.0% |
| FLJ33215      | 259282 | 20.5% | 19.5% | 34.9% | 25.0% |
| MTB           | 54892  | 20.0% | 19.9% | 35.0% | 25.0% |

|            |           |       |       |       |       |
|------------|-----------|-------|-------|-------|-------|
| IL8RB      | 3579      | 28.0% | 23.6% | 23.3% | 25.0% |
| LOC388939  | 388939    | 26.9% | 17.0% | 31.0% | 25.0% |
| C20ORF151  | 140893    | 36.8% | 5.4%  | 32.7% | 25.0% |
| ANP32D     | 23519     | 30.8% | 22.6% | 21.5% | 25.0% |
| ASNS       | 440       | 24.5% | 22.2% | 28.3% | 25.0% |
| KIAA0090   | 23065     | 27.2% | 22.2% | 25.5% | 25.0% |
| TAS2R46    | 259292    | 35.1% | 23.1% | 16.7% | 25.0% |
| CPNE2      | 221184    | 15.2% | 30.0% | 29.7% | 25.0% |
| TMOD2      | 29767     | 40.9% | 15.8% | 18.2% | 25.0% |
| RDH13      | 112724    | 26.8% | 21.2% | 27.0% | 25.0% |
| FLJ45139   | 400867    | 24.5% | 26.1% | 24.3% | 25.0% |
| SAA4       | 6291      | 30.7% | 26.4% | 17.8% | 25.0% |
| LEPREL1    | 55214     | 24.5% | 32.3% | 18.2% | 25.0% |
| HOXB5      | 3215      | 20.9% | 18.9% | 35.1% | 25.0% |
| DPP10      | 57628     | 34.0% | 21.2% | 19.7% | 25.0% |
| KIAA1008   | 22894     | 29.0% | 28.4% | 17.5% | 25.0% |
| FCHSD1     | 89848     | 21.7% | 29.7% | 23.5% | 25.0% |
| SLC22A16   | 85413     | 32.1% | 25.1% | 17.8% | 25.0% |
| ZCCHC5     | 203430    | 27.8% | 28.9% | 18.2% | 25.0% |
| LOC90268   | 90268     | 23.1% | 24.3% | 27.5% | 25.0% |
| RANBP10    | 57610     | 28.5% | 22.4% | 24.1% | 25.0% |
| FKBP3      | 2287      | 25.6% | 27.0% | 22.4% | 25.0% |
| ADP-GK     | 83440     | 30.5% | 24.5% | 20.0% | 25.0% |
| OR8A1      | 390275    | 21.3% | 25.4% | 28.2% | 25.0% |
| IMPG2      | 50939     | 23.8% | 27.7% | 23.5% | 25.0% |
| DPCD       | 25911     | 24.5% | 21.5% | 29.0% | 25.0% |
| CYP24A1    | 1591      | 37.1% | 17.6% | 20.2% | 25.0% |
| BCLAF1     | 9774      | 41.5% | 14.4% | 19.0% | 25.0% |
| MGC14376   | 84981     | 42.3% | 14.6% | 18.1% | 25.0% |
| ELOVL1     | 64834     | 29.4% | 23.6% | 21.9% | 25.0% |
| TIE        | 7075      | 34.3% | 15.5% | 25.1% | 25.0% |
| FLJ40296   | 122183    | 21.1% | 31.9% | 22.0% | 25.0% |
| GRM8       | 2918      | 32.6% | 21.5% | 20.9% | 25.0% |
| RALGPS1    | 9649      | 30.0% | 22.7% | 22.3% | 25.0% |
| POPDC3     | 64208     | 33.0% | 24.3% | 17.7% | 25.0% |
| C6ORF134   | 79969     | 36.3% | 24.8% | 13.9% | 25.0% |
| SPIB       | 6689      | 19.1% | 33.8% | 22.1% | 25.0% |
| FLJ32642   | 137492    | 26.7% | 20.9% | 27.4% | 25.0% |
| RABIF      | 5877      | 32.0% | 19.3% | 23.6% | 25.0% |
| OSBP       | 5007      | 32.3% | 21.7% | 21.0% | 25.0% |
| UBE2L6     | 9246      | 32.9% | 19.3% | 22.8% | 25.0% |
| HIST1H1T   | 3010      | 22.3% | 15.5% | 37.2% | 25.0% |
| EFEMP1     | 2202      | 25.3% | 24.7% | 24.9% | 25.0% |
| FLJ39873   | 201633    | 23.1% | 22.3% | 29.6% | 25.0% |
| SNN        | 8303      | 27.3% | 29.1% | 18.6% | 25.0% |
| PAX9       | 5083      | 26.2% | 28.7% | 20.1% | 25.0% |
| SPANXC     | 64663     | 35.7% | 13.6% | 25.6% | 25.0% |
| CXorf64    | 100130613 | 29.9% | 19.9% | 25.2% | 25.0% |
| CES3       | 23491     | 29.9% | 30.4% | 14.7% | 25.0% |
| CYB5-M     | 80777     | 23.4% | 24.4% | 27.2% | 25.0% |
| C17ORF38   | 146850    | 31.3% | 23.1% | 20.6% | 25.0% |
| MAT2B      | 27430     | 31.3% | 19.2% | 24.6% | 25.0% |
| RPL36AL    | 6166      | 29.0% | 18.7% | 27.3% | 25.0% |
| LOC340554  | 340554    | 23.7% | 25.3% | 26.0% | 25.0% |
| VAMP2      | 6844      | 26.6% | 21.7% | 26.7% | 25.0% |
| HLX1       | 3142      | 29.0% | 20.4% | 25.6% | 25.0% |
| FLJ32363   | 375444    | 17.5% | 25.0% | 32.5% | 25.0% |
| C14ORF49   | 161176    | 35.0% | 24.1% | 15.9% | 25.0% |
| C10orf62   | 414157    | 25.9% | 27.4% | 21.7% | 25.0% |
| RAB14      | 51552     | 33.1% | 20.1% | 21.8% | 25.0% |
| FLJ30046   | 122060    | 26.4% | 19.7% | 28.9% | 25.0% |
| CLTC       | 1213      | 33.5% | 22.4% | 19.2% | 25.0% |
| HRIHF82122 | 11078     | 25.5% | 17.6% | 31.9% | 25.0% |
| FBXO8      | 26269     | 40.7% | 19.4% | 14.9% | 25.0% |
| MCAM       | 4162      | 26.4% | 33.0% | 15.7% | 25.0% |
| ZMYND10    | 51364     | 33.7% | 20.4% | 20.9% | 25.0% |
| C13ORF24   | 10464     | 29.8% | 15.2% | 30.1% | 25.0% |
| COG5       | 10466     | 30.1% | 19.7% | 25.2% | 25.0% |
| PDCD8      | 9131      | 26.7% | 23.0% | 25.4% | 25.0% |
| CD14       | 929       | 31.5% | 21.1% | 22.5% | 25.0% |
| MCOLN1     | 57192     | 33.6% | 10.1% | 31.4% | 25.0% |
| SERPINA10  | 51156     | 37.4% | 14.4% | 23.3% | 25.0% |
| INPP5D     | 3635      | 29.3% | 23.4% | 22.3% | 25.0% |
| SEC8L1     | 60412     | 16.7% | 24.7% | 33.7% | 25.0% |
| FLJ45880   | 389114    | 21.3% | 23.1% | 30.7% | 25.0% |
| C13ORF1    | 57213     | 31.0% | 16.5% | 27.6% | 25.0% |
| LOC400509  | 400509    | 20.3% | 30.2% | 24.5% | 25.0% |
| TUBD1      | 51174     | 22.0% | 30.3% | 22.8% | 25.0% |
| LOC51334   | 51334     | 19.9% | 17.7% | 37.4% | 25.0% |
| CNNM3      | 26505     | 28.9% | 19.3% | 26.9% | 25.0% |
| APM-1      | 201501    | 21.8% | 20.7% | 32.5% | 25.0% |
| FLJ12541   | 64220     | 15.0% | 20.6% | 39.4% | 25.0% |
| NPPA       | 4878      | 37.8% | 20.5% | 16.8% | 25.0% |
| OSBPL10    | 114884    | 32.4% | 18.2% | 24.5% | 25.0% |
| DDX24      | 57062     | 21.9% | 34.8% | 18.4% | 25.0% |
| FLJ31295   | 121274    | 15.9% | 24.6% | 34.6% | 25.0% |
| PRDM5      | 11107     | 28.1% | 26.2% | 20.8% | 25.0% |
| FSD1       | 79187     | 31.7% | 14.4% | 28.9% | 25.0% |
| FLJ22843   | 80258     | 18.8% | 18.6% | 37.7% | 25.0% |
| KRTAP18-8  | 386681    | 14.0% | 17.9% | 43.1% | 25.0% |
| MGC20398   | 91603     | 25.0% | 16.0% | 34.1% | 25.0% |
| C7ORF35    | 85025     | 24.0% | 24.6% | 26.5% | 25.0% |
| PPP1R1B    | 84152     | 35.0% | 18.8% | 21.3% | 25.0% |
| JDP2       | 122953    | 35.5% | 18.2% | 21.4% | 25.0% |
| GHR        | 2690      | 40.6% | 14.9% | 19.7% | 25.0% |
| ATP10B     | 23120     | 37.5% | 14.2% | 23.4% | 25.0% |
| LOC400120  | 400120    | 20.2% | 23.7% | 31.2% | 25.0% |
| HLF        | 3131      | 32.4% | 24.4% | 18.3% | 25.0% |

|               |           |       |       |       |       |
|---------------|-----------|-------|-------|-------|-------|
| TM6SF1        | 53346     | 32.9% | 21.9% | 20.3% | 25.0% |
| EF1D          | 1936      | 27.8% | 19.0% | 28.2% | 25.0% |
| LOC285148     | 285148    | 21.9% | 20.3% | 33.0% | 25.0% |
| SETDB1        | 9869      | 34.5% | 16.2% | 24.4% | 25.0% |
| AKNA          | 80709     | 24.2% | 29.8% | 21.1% | 25.0% |
| NT5C3         | 51251     | 15.7% | 39.1% | 20.4% | 25.0% |
| CNTN6         | 27255     | 35.5% | 20.3% | 19.3% | 25.0% |
| WASF3         | 10810     | 34.2% | 14.6% | 26.3% | 25.0% |
| SESTD1        | 91404     | 33.1% | 20.4% | 21.6% | 25.0% |
| VILL          | 50853     | 33.3% | 19.3% | 22.5% | 25.0% |
| RBBP7         | 5931      | 29.5% | 18.2% | 27.5% | 25.0% |
| CYCS          | 54205     | 30.6% | 19.4% | 25.1% | 25.0% |
| PGM5          | 5239      | 26.5% | 17.5% | 31.1% | 25.0% |
| FLJ25421      | 150350    | 26.0% | 19.9% | 29.3% | 25.1% |
| B3GNT3        | 10331     | 33.3% | 19.1% | 22.7% | 25.1% |
| MYO1A         | 4640      | 31.3% | 20.8% | 23.1% | 25.1% |
| ATP8B3        | 148229    | 31.7% | 18.6% | 24.9% | 25.1% |
| HTR1B         | 3351      | 30.6% | 23.8% | 20.8% | 25.1% |
| FRMPD2        | 143162    | 44.7% | 10.5% | 20.0% | 25.1% |
| H3F3A         | 3020      | 15.7% | 25.9% | 33.6% | 25.1% |
| DEFB107B      | 503614    | 18.3% | 22.6% | 34.3% | 25.1% |
| LOC388551     | 388551    | 26.8% | 13.6% | 34.7% | 25.1% |
| MLL5          | 55904     | 26.9% | 13.6% | 34.7% | 25.1% |
| ZNF511        | 118472    | 21.3% | 20.9% | 33.0% | 25.1% |
| ACOT6         | 641372    | 31.2% | 29.2% | 14.8% | 25.1% |
| ACSL3         | 2181      | 22.4% | 23.9% | 28.9% | 25.1% |
| TUBB          | 203068    | 22.2% | 23.4% | 29.5% | 25.1% |
| DKFZP434K1421 | 84081     | 14.3% | 14.1% | 46.8% | 25.1% |
| PMVK          | 10654     | 15.0% | 25.1% | 35.1% | 25.1% |
| GPR115        | 221393    | 21.5% | 23.9% | 29.8% | 25.1% |
| IFRG15        | 64163     | 28.0% | 20.5% | 26.6% | 25.1% |
| PCBD2         | 84105     | 19.8% | 20.2% | 35.2% | 25.1% |
| TUBB4         | 10382     | 21.1% | 10.1% | 43.9% | 25.1% |
| ADCY8         | 114       | 34.2% | 13.8% | 27.1% | 25.1% |
| CFL2          | 1073      | 26.5% | 23.5% | 25.2% | 25.1% |
| OR7E24        | 26648     | 29.3% | 28.6% | 17.3% | 25.1% |
| RRAGD         | 58528     | 26.5% | 25.7% | 23.1% | 25.1% |
| POLR2J        | 5439      | 33.1% | 16.8% | 25.3% | 25.1% |
| VCP1P1        | 80124     | 20.5% | 28.7% | 26.0% | 25.1% |
| RIN2          | 54453     | 14.1% | 30.7% | 30.4% | 25.1% |
| AP2E          | 339488    | 15.4% | 24.8% | 35.0% | 25.1% |
| OR11H1        | 81061     | 34.5% | 19.8% | 20.9% | 25.1% |
| RFXAP         | 5994      | 19.5% | 24.4% | 31.3% | 25.1% |
| NAV3          | 89795     | 30.6% | 19.1% | 25.5% | 25.1% |
| LOC126298     | 126298    | 27.0% | 12.1% | 36.0% | 25.1% |
| FOXRI         | 283150    | 29.7% | 18.3% | 27.2% | 25.1% |
| KIR3DL1       | 3811      | 28.9% | 27.4% | 18.9% | 25.1% |
| C14ORF101     | 54916     | 36.1% | 23.6% | 15.5% | 25.1% |
| LCN7          | 64129     | 28.6% | 20.0% | 26.7% | 25.1% |
| WDR70         | 55100     | 20.4% | 23.7% | 31.2% | 25.1% |
| NYD-SP20      | 84690     | 18.0% | 24.1% | 33.2% | 25.1% |
| RGS7          | 6000      | 26.2% | 28.6% | 20.5% | 25.1% |
| OACT1         | 154141    | 21.1% | 19.2% | 34.9% | 25.1% |
| HSC20         | 150274    | 31.8% | 8.6%  | 34.9% | 25.1% |
| ZNF142        | 7701      | 36.2% | 26.5% | 12.6% | 25.1% |
| C1orf151      | 440574    | 30.0% | 18.2% | 27.1% | 25.1% |
| LOC399726     | 399726    | 22.5% | 18.9% | 33.9% | 25.1% |
| RAB30         | 27314     | 31.9% | 17.7% | 25.7% | 25.1% |
| FLJ21919      | 65123     | 30.9% | 15.8% | 28.7% | 25.1% |
| TPI1          | 7167      | 21.4% | 26.5% | 27.4% | 25.1% |
| PEA15         | 8682      | 35.4% | 15.0% | 24.9% | 25.1% |
| FBXO21        | 23014     | 24.0% | 27.4% | 23.9% | 25.1% |
| C18ORF9       | 79959     | 14.3% | 27.1% | 33.8% | 25.1% |
| TBC1D14       | 57533     | 31.4% | 20.4% | 23.5% | 25.1% |
| KIAA0753      | 9851      | 24.8% | 23.0% | 27.5% | 25.1% |
| RAB4A         | 5867      | 24.9% | 25.5% | 24.9% | 25.1% |
| GCLM          | 2730      | 35.7% | 18.6% | 21.0% | 25.1% |
| POLD1         | 5424      | 43.5% | 20.0% | 11.8% | 25.1% |
| FBXO46        | 23403     | 31.4% | 18.3% | 25.6% | 25.1% |
| TESK2         | 10420     | 22.7% | 25.2% | 27.4% | 25.1% |
| FLJ11280      | 55793     | 23.3% | 11.5% | 40.5% | 25.1% |
| RIT2          | 6014      | 39.2% | 10.9% | 25.2% | 25.1% |
| OTUB1         | 55611     | 32.2% | 17.9% | 25.2% | 25.1% |
| HIST1H2BA     | 255626    | 34.0% | 20.4% | 20.9% | 25.1% |
| SUMO1         | 7341      | 29.5% | 20.4% | 25.4% | 25.1% |
| FLJ14345      | 79788     | 15.7% | 29.9% | 29.7% | 25.1% |
| BRUNOL4       | 56853     | 32.5% | 16.0% | 26.8% | 25.1% |
| RASGEF1B      | 153020    | 26.2% | 36.4% | 12.7% | 25.1% |
| TAS2R13       | 50838     | 39.8% | 19.8% | 15.8% | 25.1% |
| TRIML1        | 339976    | 27.2% | 19.5% | 28.6% | 25.1% |
| HCN2          | 610       | 32.5% | 20.0% | 22.8% | 25.1% |
| ZCWPW1        | 55063     | 29.1% | 22.8% | 23.4% | 25.1% |
| LOC100131897  | 100131897 | 22.7% | 24.8% | 27.9% | 25.1% |
| GABRB1        | 2560      | 33.2% | 16.1% | 26.0% | 25.1% |
| DMRTA1        | 63951     | 31.9% | 23.4% | 20.0% | 25.1% |
| FLJ44299      | 339145    | 24.6% | 19.7% | 31.0% | 25.1% |
| FRDA          | 2395      | 23.6% | 22.3% | 29.5% | 25.1% |
| FLJ14668      | 84908     | 15.8% | 24.2% | 35.4% | 25.1% |
| C10ORF35      | 219738    | 27.2% | 27.6% | 20.5% | 25.1% |
| PCDHGB5       | 56101     | 32.6% | 19.9% | 22.8% | 25.1% |
| COL4A2        | 1284      | 14.6% | 33.3% | 27.4% | 25.1% |
| GOT1          | 2805      | 33.7% | 15.6% | 26.1% | 25.1% |
| LOC399940     | 399940    | 25.6% | 23.7% | 26.1% | 25.1% |
| TTC17         | 55761     | 24.1% | 29.3% | 22.0% | 25.1% |
| DKFZP761I2123 | 83637     | 19.7% | 23.2% | 32.4% | 25.1% |
| DJ159A19.3    | 27245     | 19.1% | 24.7% | 31.6% | 25.1% |
| ORS2L1        | 338751    | 30.4% | 23.6% | 21.3% | 25.1% |
| BCL10         | 8915      | 31.4% | 20.9% | 23.0% | 25.1% |

|           |        |       |       |       |       |
|-----------|--------|-------|-------|-------|-------|
| H2AFB2    | 474381 | 26.0% | 27.5% | 21.9% | 25.1% |
| LEP       | 3952   | 41.7% | 14.8% | 18.8% | 25.1% |
| OR5B17    | 219965 | 35.1% | 15.4% | 24.9% | 25.1% |
| MCM3      | 4172   | 30.3% | 23.2% | 21.9% | 25.1% |
| XPOT      | 11260  | 18.9% | 30.0% | 26.5% | 25.1% |
| SLC24A5   | 283652 | 38.0% | 18.8% | 18.7% | 25.1% |
| H3F3B     | 3021   | 27.6% | 27.8% | 20.0% | 25.1% |
| MYOM1     | 8736   | 28.6% | 20.7% | 26.1% | 25.1% |
| RBM7      | 10179  | 24.0% | 30.7% | 20.7% | 25.1% |
| DNA2L     | 1763   | 36.5% | 19.7% | 19.3% | 25.1% |
| ITGAM     | 3684   | 25.9% | 21.5% | 28.0% | 25.1% |
| ZNF21     | 7569   | 29.4% | 15.5% | 30.5% | 25.1% |
| C20ORF121 | 79183  | 35.1% | 21.0% | 19.4% | 25.1% |
| LOC389860 | 389860 | 20.3% | 26.3% | 28.8% | 25.1% |
| C6ORF213  | 134829 | 14.6% | 27.1% | 33.8% | 25.1% |
| SYT9      | 143425 | 33.3% | 17.6% | 24.5% | 25.1% |
| C18ORF22  | 79863  | 29.6% | 13.3% | 32.5% | 25.1% |
| MAGI-3    | 260425 | 22.4% | 29.1% | 23.9% | 25.1% |
| NEUROG2   | 63973  | 29.1% | 20.9% | 25.4% | 25.1% |
| TP53      | 7157   | 38.2% | 11.7% | 25.5% | 25.1% |
| SH3GL3    | 6457   | 29.2% | 20.3% | 25.9% | 25.1% |
| KIAA0427  | 9811   | 25.7% | 22.8% | 27.0% | 25.1% |
| DDX55     | 57696  | 37.4% | 16.0% | 22.1% | 25.1% |
| OR8J1     | 219477 | 22.9% | 25.9% | 26.6% | 25.1% |
| PTRH2     | 51651  | 14.8% | 27.6% | 33.1% | 25.1% |
| ACTL7B    | 10880  | 27.8% | 21.0% | 26.7% | 25.1% |
| PDLIM1    | 9124   | 29.1% | 20.9% | 25.5% | 25.1% |
| EXOSC7    | 23016  | 29.1% | 19.3% | 27.1% | 25.1% |
| MART2     | 55733  | 27.3% | 20.2% | 27.9% | 25.1% |
| M11S1     | 4076   | 22.5% | 16.9% | 36.0% | 25.1% |
| DNAJB6    | 10049  | 38.9% | 13.2% | 23.4% | 25.1% |
| GAGED3    | 9502   | 22.0% | 23.3% | 30.1% | 25.1% |
| CLDN4     | 1364   | 27.0% | 17.6% | 30.8% | 25.1% |
| SLC43A3   | 29015  | 27.4% | 19.7% | 28.3% | 25.2% |
| RBKS      | 64080  | 24.8% | 23.0% | 27.7% | 25.2% |
| FLJ33979  | 196074 | 29.3% | 23.3% | 22.9% | 25.2% |
| OR10G8    | 219869 | 34.7% | 8.7%  | 32.1% | 25.2% |
| C21ORF66  | 94104  | 14.3% | 33.0% | 28.2% | 25.2% |
| HSD17B6   | 8630   | 27.5% | 15.3% | 32.6% | 25.2% |
| ENPEP     | 2028   | 31.6% | 23.9% | 19.9% | 25.2% |
| COX8A     | 1351   | 27.3% | 24.5% | 23.6% | 25.2% |
| C20ORF44  | 55245  | 31.6% | 18.2% | 25.7% | 25.2% |
| OR5K1     | 26339  | 36.5% | 9.6%  | 29.4% | 25.2% |
| LOC199920 | 199920 | 26.5% | 26.9% | 22.1% | 25.2% |
| MGC10820  | 84734  | 29.0% | 16.6% | 29.9% | 25.2% |
| TM6SF2    | 53345  | 18.5% | 24.7% | 32.3% | 25.2% |
| OR4C12    | 283093 | 22.8% | 20.1% | 32.7% | 25.2% |
| C10ORF76  | 79591  | 22.7% | 23.4% | 29.4% | 25.2% |
| FILIP1    | 27145  | 34.8% | 14.4% | 26.2% | 25.2% |
| KCNG3     | 170850 | 28.9% | 23.1% | 23.5% | 25.2% |
| PRH1      | 5554   | 29.2% | 22.2% | 24.1% | 25.2% |
| PRKD2     | 25865  | 26.1% | 28.0% | 21.4% | 25.2% |
| DUSP11    | 8446   | 23.3% | 32.1% | 20.1% | 25.2% |
| C11ORF23  | 55291  | 23.8% | 10.8% | 41.0% | 25.2% |
| NKIR      | 146722 | 27.5% | 16.9% | 31.1% | 25.2% |
| AR        | 367    | 29.9% | 19.4% | 26.3% | 25.2% |
| LHX4      | 89884  | 30.4% | 16.4% | 28.7% | 25.2% |
| USP10     | 9100   | 34.5% | 21.1% | 20.0% | 25.2% |
| FLJ26175  | 388566 | 19.0% | 22.2% | 34.3% | 25.2% |
| IFNGR1    | 3459   | 38.0% | 15.1% | 22.4% | 25.2% |
| LOC203413 | 203413 | 28.0% | 18.8% | 28.7% | 25.2% |
| KIAA0415  | 9907   | 37.2% | 26.2% | 12.2% | 25.2% |
| FLJ40083  | 348807 | 27.3% | 15.6% | 32.7% | 25.2% |
| USP19     | 10869  | 29.0% | 22.9% | 23.7% | 25.2% |
| TRPM1     | 4308   | 34.8% | 16.5% | 24.3% | 25.2% |
| ACBD5     | 91452  | 22.0% | 20.1% | 33.5% | 25.2% |
| KIAA1295  | 285590 | 22.2% | 29.9% | 23.5% | 25.2% |
| PPP1R12B  | 4660   | 24.4% | 26.2% | 25.0% | 25.2% |
| REC14     | 80349  | 18.5% | 11.1% | 46.0% | 25.2% |
| CXCL13    | 10563  | 16.2% | 30.5% | 28.9% | 25.2% |
| TBCA      | 6902   | 28.0% | 21.4% | 26.2% | 25.2% |
| UBE3C     | 9690   | 33.1% | 24.7% | 17.9% | 25.2% |
| TPO       | 7173   | 28.6% | 23.2% | 23.8% | 25.2% |
| TENC1     | 23371  | 22.7% | 26.5% | 26.4% | 25.2% |
| ACOXL     | 55289  | 19.2% | 25.2% | 31.1% | 25.2% |
| OR6G6     | 283365 | 23.1% | 32.7% | 19.9% | 25.2% |
| NCN       | 23154  | 32.2% | 21.2% | 22.2% | 25.2% |
| ZC3HDC6   | 376940 | 28.3% | 14.9% | 32.4% | 25.2% |
| TFAP2C    | 7022   | 21.3% | 23.9% | 30.4% | 25.2% |
| ACYP2     | 98     | 15.5% | 27.8% | 32.3% | 25.2% |
| FUT7      | 2529   | 36.7% | 10.7% | 28.1% | 25.2% |
| RNF133    | 168433 | 21.5% | 25.4% | 28.7% | 25.2% |
| C6ORF27   | 80737  | 25.0% | 29.1% | 21.5% | 25.2% |
| TGM2      | 7052   | 32.8% | 16.1% | 26.7% | 25.2% |
| ARP3BETA  | 57180  | 23.3% | 17.4% | 35.0% | 25.2% |
| AKR1C2    | 1646   | 24.7% | 22.8% | 28.0% | 25.2% |
| HBP17     | 9982   | 20.1% | 28.2% | 27.3% | 25.2% |
| MPP1      | 4354   | 27.8% | 24.5% | 23.3% | 25.2% |
| RBMX2     | 51634  | 37.0% | 17.1% | 21.5% | 25.2% |
| PTER      | 9317   | 34.7% | 10.0% | 30.9% | 25.2% |
| ZNF505    | 81931  | 24.4% | 15.3% | 35.8% | 25.2% |
| MGC4606   | 79447  | 22.0% | 18.9% | 34.8% | 25.2% |
| GJA12     | 57165  | 23.9% | 27.4% | 24.3% | 25.2% |
| ZDHC19    | 131540 | 30.7% | 17.3% | 27.7% | 25.2% |
| KPNA2     | 3838   | 30.1% | 20.9% | 24.6% | 25.2% |
| C17ORF35  | 8834   | 23.3% | 27.1% | 25.3% | 25.2% |
| ADAM33    | 80332  | 20.5% | 29.5% | 25.6% | 25.2% |
| C14ORF111 | 51077  | 28.3% | 19.4% | 27.8% | 25.2% |



|               |           |       |       |       |       |
|---------------|-----------|-------|-------|-------|-------|
| MGC5139       | 84747     | 38.4% | 20.0% | 17.2% | 25.2% |
| WBP1          | 23559     | 31.3% | 19.0% | 25.3% | 25.2% |
| SLC36A1       | 206358    | 37.6% | 12.5% | 25.5% | 25.2% |
| CXCR4         | 7852      | 27.0% | 19.6% | 29.0% | 25.2% |
| KIAA1754      | 85450     | 23.2% | 23.8% | 28.6% | 25.2% |
| PENK          | 5179      | 35.1% | 19.4% | 21.1% | 25.2% |
| ANXA8L1       | 653145    | 20.3% | 39.0% | 16.4% | 25.2% |
| F8A           | 8263      | 31.0% | 11.1% | 33.6% | 25.2% |
| BST1          | 683       | 33.4% | 18.0% | 24.2% | 25.2% |
| TFCP2L2       | 29841     | 22.0% | 11.9% | 41.8% | 25.2% |
| SEC3L1        | 55763     | 21.6% | 34.4% | 19.6% | 25.2% |
| TSARG6        | 374407    | 27.7% | 19.7% | 28.3% | 25.2% |
| ING4          | 51147     | 32.5% | 19.1% | 24.0% | 25.2% |
| C14ORF123     | 29082     | 20.8% | 16.6% | 38.3% | 25.2% |
| MYOHD1        | 80179     | 40.8% | 8.3%  | 26.5% | 25.2% |
| DKFZP564O1664 | 81556     | 18.7% | 23.4% | 33.5% | 25.2% |
| ALS2CR3       | 66008     | 33.1% | 24.5% | 18.1% | 25.2% |
| C12ORF10      | 60314     | 22.9% | 26.4% | 26.4% | 25.2% |
| DLG5          | 9231      | 24.8% | 21.4% | 29.4% | 25.2% |
| PRKAR2B       | 5577      | 31.1% | 27.3% | 17.3% | 25.2% |
| CGB1          | 114335    | 34.0% | 22.2% | 19.5% | 25.2% |
| EMILIN1       | 11117     | 33.5% | 17.2% | 25.0% | 25.2% |
| GRASP         | 160622    | 30.1% | 16.2% | 29.4% | 25.2% |
| CTF1          | 1489      | 38.7% | 13.0% | 24.0% | 25.2% |
| LOC400506     | 400506    | 39.5% | 13.4% | 22.7% | 25.2% |
| CKLFSF4       | 146223    | 23.1% | 25.4% | 27.2% | 25.2% |
| LIPF          | 8513      | 26.8% | 27.1% | 21.8% | 25.2% |
| CNO           | 55330     | 22.7% | 21.7% | 31.2% | 25.2% |
| SEPX1         | 51734     | 19.7% | 33.9% | 22.1% | 25.2% |
| CDK7          | 1022      | 23.2% | 31.3% | 21.3% | 25.2% |
| HP1-BP74      | 50809     | 23.6% | 17.6% | 34.5% | 25.2% |
| FLJ44635      | 392490    | 26.3% | 24.2% | 25.1% | 25.2% |
| NKX2-3        | 159296    | 35.2% | 11.0% | 29.4% | 25.2% |
| PMCH          | 5367      | 26.4% | 22.7% | 26.6% | 25.2% |
| PMM2          | 5373      | 34.8% | 17.1% | 23.9% | 25.2% |
| KIF3B         | 9371      | 27.3% | 24.0% | 24.3% | 25.2% |
| KIAA1919      | 91749     | 26.6% | 26.9% | 22.2% | 25.2% |
| LOC123876     | 123876    | 31.0% | 25.0% | 19.7% | 25.2% |
| SERPINA5      | 5104      | 31.8% | 17.5% | 26.4% | 25.2% |
| LOC388135     | 388135    | 27.9% | 21.1% | 26.7% | 25.2% |
| LOC55565      | 55565     | 16.7% | 24.2% | 34.9% | 25.2% |
| CDS3          | 963       | 25.3% | 28.8% | 21.6% | 25.2% |
| OGN           | 4969      | 27.7% | 17.0% | 31.0% | 25.2% |
| SS18L1        | 26039     | 32.0% | 18.4% | 25.3% | 25.2% |
| LSP1          | 4046      | 22.7% | 27.7% | 25.3% | 25.2% |
| IDH2          | 3418      | 41.2% | 18.6% | 15.9% | 25.2% |
| UBE2C         | 11065     | 31.1% | 22.9% | 21.7% | 25.2% |
| HDAC2         | 3066      | 36.4% | 16.8% | 22.6% | 25.2% |
| MAPKAP1       | 79109     | 37.9% | 17.5% | 20.4% | 25.2% |
| MYOC          | 4653      | 34.1% | 19.7% | 22.0% | 25.2% |
| JRK           | 8629      | 34.2% | 17.3% | 24.2% | 25.2% |
| SSTR1         | 6751      | 27.9% | 20.3% | 27.5% | 25.2% |
| FLJ32880      | 254187    | 28.7% | 22.2% | 24.9% | 25.2% |
| AVEN          | 57099     | 27.2% | 19.3% | 29.2% | 25.2% |
| CCR1          | 1230      | 26.1% | 25.2% | 24.5% | 25.2% |
| TNPO3         | 23534     | 32.7% | 15.5% | 27.5% | 25.2% |
| IRTA2         | 83416     | 22.7% | 22.3% | 30.8% | 25.2% |
| KRTHA4        | 3885      | 31.9% | 18.5% | 25.3% | 25.2% |
| ASH1L         | 55870     | 30.3% | 26.1% | 19.4% | 25.3% |
| APOC4         | 346       | 36.3% | 10.5% | 28.9% | 25.3% |
| FVT1          | 2531      | 21.5% | 25.0% | 29.2% | 25.3% |
| INSR          | 3643      | 25.6% | 23.9% | 26.2% | 25.3% |
| BRD2          | 6046      | 19.4% | 21.4% | 34.9% | 25.3% |
| FLJ38607      | 199699    | 22.2% | 17.5% | 36.1% | 25.3% |
| C20ORF114     | 92747     | 32.8% | 22.7% | 20.3% | 25.3% |
| C9ORF102      | 56959     | 33.6% | 17.8% | 24.4% | 25.3% |
| LOC150786     | 150786    | 25.9% | 28.0% | 21.9% | 25.3% |
| C21ORF2       | 755       | 31.0% | 27.4% | 17.4% | 25.3% |
| C10ORF53      | 282966    | 31.4% | 19.1% | 25.3% | 25.3% |
| DDX51         | 317781    | 21.5% | 33.2% | 21.1% | 25.3% |
| SKIP          | 51763     | 31.5% | 22.4% | 21.8% | 25.3% |
| RIC-8         | 60626     | 16.2% | 35.9% | 23.7% | 25.3% |
| MGC42105      | 167359    | 22.9% | 21.3% | 31.6% | 25.3% |
| DKK2          | 27123     | 25.7% | 18.3% | 31.8% | 25.3% |
| PHF7          | 51533     | 33.2% | 16.7% | 25.9% | 25.3% |
| MRV1          | 10335     | 25.3% | 21.1% | 29.5% | 25.3% |
| PR48          | 28227     | 23.9% | 32.8% | 19.2% | 25.3% |
| ZNF574        | 64763     | 26.3% | 28.1% | 21.4% | 25.3% |
| SIL1          | 64374     | 21.4% | 23.0% | 31.4% | 25.3% |
| C5ORF3        | 10827     | 30.1% | 24.4% | 21.2% | 25.3% |
| C6ORF31       | 80863     | 25.6% | 22.5% | 27.7% | 25.3% |
| USP4          | 7375      | 28.2% | 26.4% | 21.2% | 25.3% |
| C20ORF36      | 55251     | 23.3% | 21.6% | 30.9% | 25.3% |
| DAO           | 1610      | 26.7% | 27.2% | 22.0% | 25.3% |
| ZFP36L1       | 677       | 34.2% | 19.2% | 22.4% | 25.3% |
| PIP3AP        | 54545     | 30.9% | 12.5% | 32.5% | 25.3% |
| ARID5A        | 10865     | 35.9% | 21.3% | 18.6% | 25.3% |
| FLJ14502      | 90417     | 23.8% | 31.6% | 20.5% | 25.3% |
| PCDH86        | 56130     | 22.1% | 27.1% | 26.6% | 25.3% |
| MAMDC2        | 256691    | 32.3% | 24.4% | 19.1% | 25.3% |
| LOC89944      | 89944     | 31.3% | 19.7% | 24.9% | 25.3% |
| FAM48B1       | 100130302 | 12.1% | 31.3% | 32.4% | 25.3% |
| KGIRS4        | 121391    | 22.3% | 21.0% | 32.6% | 25.3% |
| MYLK2         | 85366     | 22.1% | 24.3% | 29.4% | 25.3% |
| ATP12A        | 479       | 32.8% | 21.0% | 22.1% | 25.3% |
| TM7SF4        | 81501     | 32.2% | 22.0% | 21.7% | 25.3% |
| C10L1         | 10882     | 27.3% | 28.8% | 19.8% | 25.3% |
| MYCL1         | 4610      | 38.8% | 12.6% | 24.4% | 25.3% |

|              |        |       |       |       |       |
|--------------|--------|-------|-------|-------|-------|
| OKL38        | 29948  | 23.7% | 30.8% | 21.4% | 25.3% |
| HYAL1        | 3373   | 25.7% | 24.8% | 25.4% | 25.3% |
| SMTN         | 6525   | 30.2% | 24.4% | 21.3% | 25.3% |
| EP300        | 2033   | 31.8% | 23.1% | 20.9% | 25.3% |
| FLJ10350     | 55700  | 23.3% | 16.1% | 36.4% | 25.3% |
| PRM1         | 5619   | 24.4% | 26.3% | 25.2% | 25.3% |
| C20ORF38     | 55304  | 28.9% | 19.4% | 27.6% | 25.3% |
| BAT2D1       | 23215  | 26.1% | 21.6% | 28.3% | 25.3% |
| HTATIP       | 10524  | 41.6% | 17.6% | 16.7% | 25.3% |
| ADAMTS12     | 81792  | 33.2% | 25.2% | 17.5% | 25.3% |
| SLC22A1      | 6580   | 35.0% | 16.2% | 24.7% | 25.3% |
| CTTN         | 2017   | 13.6% | 33.5% | 28.8% | 25.3% |
| ITGA2        | 3673   | 30.5% | 26.2% | 19.2% | 25.3% |
| LOC220929    | 220929 | 14.9% | 28.7% | 32.4% | 25.3% |
| MGC33190     | 222255 | 18.2% | 21.2% | 36.5% | 25.3% |
| YWHAH        | 7533   | 26.2% | 24.9% | 24.8% | 25.3% |
| FN3K         | 64122  | 28.5% | 20.1% | 27.3% | 25.3% |
| MBD3L2       | 125997 | 42.2% | 13.1% | 20.6% | 25.3% |
| MMP24        | 10893  | 38.1% | 17.2% | 20.6% | 25.3% |
| GLE1L        | 2733   | 29.2% | 24.6% | 22.1% | 25.3% |
| DLX5         | 1749   | 33.8% | 21.9% | 20.3% | 25.3% |
| MRPL3        | 11222  | 39.0% | 14.1% | 22.7% | 25.3% |
| KIAA1838     | 84498  | 23.2% | 26.5% | 26.2% | 25.3% |
| OSBPL11      | 114885 | 22.7% | 22.7% | 30.5% | 25.3% |
| ACTR1A       | 10121  | 26.1% | 25.5% | 24.4% | 25.3% |
| LOC157567    | 157567 | 24.6% | 22.8% | 28.5% | 25.3% |
| GPR2         | 2826   | 20.7% | 31.3% | 24.0% | 25.3% |
| SEC24D       | 9871   | 31.1% | 18.5% | 26.4% | 25.3% |
| LOC120526    | 120526 | 17.4% | 30.7% | 27.9% | 25.3% |
| FLJ21908     | 79657  | 26.2% | 29.3% | 20.5% | 25.3% |
| FLJ35382     | 163859 | 20.4% | 14.7% | 40.9% | 25.3% |
| MSL2L1       | 55167  | 27.8% | 26.1% | 22.1% | 25.3% |
| C6ORF157     | 90025  | 38.5% | 17.1% | 20.4% | 25.3% |
| THAP6        | 152815 | 28.6% | 25.4% | 22.0% | 25.3% |
| VTI1A        | 143187 | 33.8% | 22.4% | 19.8% | 25.3% |
| STMN3        | 50861  | 33.3% | 15.2% | 27.5% | 25.3% |
| ZNF297       | 9278   | 18.8% | 16.0% | 41.2% | 25.3% |
| MGC41816     | 51239  | 28.0% | 17.9% | 30.1% | 25.3% |
| KIAA1909     | 153478 | 31.9% | 22.4% | 21.7% | 25.3% |
| GSTM2        | 2946   | 35.4% | 18.0% | 22.6% | 25.3% |
| CRTC2        | 200186 | 32.8% | 33.1% | 10.0% | 25.3% |
| KLK10        | 5655   | 22.9% | 36.6% | 16.5% | 25.3% |
| TSC22D1      | 8848   | 24.4% | 21.6% | 30.0% | 25.3% |
| LOC81691     | 81691  | 30.3% | 23.4% | 22.2% | 25.3% |
| SCGB1A1      | 7356   | 25.5% | 26.4% | 24.0% | 25.3% |
| PANX3        | 116337 | 32.1% | 23.5% | 20.4% | 25.3% |
| CINP         | 51550  | 28.3% | 29.1% | 18.6% | 25.3% |
| F5           | 2153   | 21.4% | 22.8% | 31.7% | 25.3% |
| HDCMA18P     | 51574  | 32.7% | 18.0% | 25.2% | 25.3% |
| SLITRK6      | 84189  | 34.6% | 17.8% | 23.5% | 25.3% |
| MDH2         | 4191   | 32.0% | 21.1% | 22.9% | 25.3% |
| TFE3         | 7030   | 50.3% | 11.1% | 14.5% | 25.3% |
| RFX3         | 5991   | 24.3% | 20.4% | 31.3% | 25.3% |
| MRGPRX2      | 117194 | 27.1% | 19.9% | 28.9% | 25.3% |
| MT4          | 84560  | 33.6% | 21.2% | 21.2% | 25.3% |
| TIMP1        | 7076   | 22.5% | 26.0% | 27.5% | 25.3% |
| MGC4172      | 79154  | 31.8% | 28.6% | 15.6% | 25.3% |
| GYPC         | 2995   | 27.4% | 21.9% | 26.7% | 25.3% |
| MGC14386     | 91433  | 34.9% | 21.2% | 19.9% | 25.3% |
| TNFSF14      | 8740   | 32.9% | 15.5% | 27.6% | 25.3% |
| ITPK1        | 3705   | 17.5% | 26.8% | 31.7% | 25.3% |
| BDNF         | 627    | 39.1% | 13.1% | 23.8% | 25.3% |
| CTSK         | 1513   | 21.4% | 23.5% | 31.1% | 25.3% |
| RPUSD1       | 113000 | 23.9% | 18.7% | 33.4% | 25.3% |
| TMEM29       | 29057  | 29.7% | 30.4% | 15.9% | 25.3% |
| DKFZP434C212 | 26130  | 20.8% | 22.4% | 32.9% | 25.3% |
| C7ORF11      | 136647 | 39.3% | 15.8% | 20.9% | 25.3% |
| FLJ20530     | 55656  | 25.4% | 13.4% | 37.2% | 25.3% |
| SMARCD1      | 6602   | 27.1% | 28.2% | 20.7% | 25.3% |
| HSPA1A       | 3303   | 32.5% | 13.7% | 29.9% | 25.3% |
| PAPLN        | 89932  | 10.6% | 33.3% | 32.1% | 25.3% |
| SYNE1        | 23345  | 31.8% | 22.7% | 21.6% | 25.3% |
| BPY2B        | 442867 | 37.8% | 23.8% | 14.5% | 25.4% |
| ZDHHC4       | 55146  | 22.9% | 21.4% | 31.8% | 25.4% |
| LOC649055    | 649055 | 38.2% | 12.9% | 25.0% | 25.4% |
| SYT12        | 91683  | 29.1% | 25.8% | 21.1% | 25.4% |
| C6ORF162     | 57150  | 20.9% | 34.3% | 20.9% | 25.4% |
| B3GNT6       | 11041  | 29.3% | 13.6% | 33.3% | 25.4% |
| CRISP1       | 167    | 35.8% | 19.1% | 21.1% | 25.4% |
| EMP2         | 2013   | 23.0% | 27.8% | 25.3% | 25.4% |
| PPP1R9A      | 55607  | 22.0% | 24.9% | 29.2% | 25.4% |
| PTHR2        | 5746   | 29.0% | 21.3% | 25.7% | 25.4% |
| KLRG1        | 10219  | 30.5% | 17.4% | 28.1% | 25.4% |
| SLC30A10     | 55532  | 23.5% | 19.8% | 32.8% | 25.4% |
| M-RIP        | 23164  | 21.5% | 23.1% | 31.5% | 25.4% |
| KCNQ5        | 56479  | 31.9% | 22.7% | 21.5% | 25.4% |
| ATPAF2       | 91647  | 29.5% | 25.9% | 20.7% | 25.4% |
| BAZA2A       | 11176  | 26.0% | 28.7% | 21.4% | 25.4% |
| OSCAR        | 126014 | 21.7% | 27.2% | 27.1% | 25.4% |
| FLJ12484     | 64782  | 17.3% | 32.2% | 26.6% | 25.4% |
| TNKS2        | 80351  | 47.0% | 11.3% | 17.7% | 25.4% |
| LOC340267    | 340267 | 23.7% | 23.0% | 29.4% | 25.4% |
| TRPV2        | 51393  | 26.1% | 17.5% | 32.4% | 25.4% |
| RNF182       | 221687 | 36.7% | 16.6% | 22.8% | 25.4% |
| CGREF1       | 10669  | 32.4% | 16.2% | 27.5% | 25.4% |
| FABP5        | 2171   | 25.7% | 20.1% | 30.4% | 25.4% |
| MAD2L2       | 10459  | 42.9% | 10.0% | 23.3% | 25.4% |
| KRTAP21-2    | 337978 | 33.2% | 20.5% | 22.4% | 25.4% |

|             |        |       |       |       |       |
|-------------|--------|-------|-------|-------|-------|
| C21ORF5     | 9980   | 12.5% | 20.4% | 43.2% | 25.4% |
| PAK2        | 5062   | 31.5% | 27.8% | 16.8% | 25.4% |
| WARS2       | 10352  | 45.6% | 10.7% | 19.8% | 25.4% |
| COMMD5      | 28991  | 28.8% | 15.7% | 31.6% | 25.4% |
| EIF2AK3     | 9451   | 24.8% | 29.1% | 22.2% | 25.4% |
| HMGCL       | 3155   | 35.2% | 14.0% | 27.0% | 25.4% |
| SEC24C      | 9632   | 28.3% | 20.9% | 26.9% | 25.4% |
| ACTR1B      | 10120  | 32.0% | 19.6% | 24.6% | 25.4% |
| NUP188      | 23511  | 24.6% | 24.5% | 27.1% | 25.4% |
| ARHGAP17    | 55114  | 25.3% | 29.9% | 20.9% | 25.4% |
| HOXC4       | 3221   | 27.7% | 16.4% | 32.0% | 25.4% |
| KIF21A      | 55605  | 30.5% | 22.3% | 23.3% | 25.4% |
| AKT2        | 208    | 25.8% | 24.3% | 26.1% | 25.4% |
| C6ORF29     | 80736  | 24.2% | 23.6% | 28.3% | 25.4% |
| FLJ40629    | 150468 | 28.4% | 9.6%  | 38.1% | 25.4% |
| PKM2        | 5315   | 29.9% | 19.9% | 26.3% | 25.4% |
| GPX5        | 2880   | 33.3% | 16.0% | 26.8% | 25.4% |
| FLJ20485    | 54517  | 22.3% | 17.2% | 36.6% | 25.4% |
| CDADC1      | 81602  | 25.2% | 20.4% | 30.6% | 25.4% |
| SLC30A5     | 64924  | 30.5% | 23.7% | 21.9% | 25.4% |
| FLJ25415    | 150709 | 20.8% | 17.4% | 38.0% | 25.4% |
| HOXD9       | 3235   | 25.4% | 25.1% | 25.7% | 25.4% |
| CHN2        | 1124   | 29.3% | 25.6% | 21.3% | 25.4% |
| PTP4A3      | 11156  | 29.7% | 31.8% | 14.7% | 25.4% |
| RASA4       | 10156  | 18.2% | 35.1% | 22.9% | 25.4% |
| PKP2        | 5318   | 25.0% | 25.0% | 26.2% | 25.4% |
| SLC22A14    | 9389   | 34.0% | 16.7% | 25.5% | 25.4% |
| CYP4F12     | 66002  | 31.8% | 23.6% | 20.8% | 25.4% |
| OR6T1       | 219874 | 26.6% | 23.2% | 26.4% | 25.4% |
| ADD3        | 120    | 39.4% | 16.2% | 20.6% | 25.4% |
| SLC4A8      | 9498   | 26.0% | 19.6% | 30.6% | 25.4% |
| LNK         | 10019  | 22.8% | 12.8% | 40.5% | 25.4% |
| LCMR1       | 219541 | 26.3% | 24.9% | 25.0% | 25.4% |
| POLG        | 5428   | 26.6% | 24.8% | 24.8% | 25.4% |
| C6ORF102    | 221458 | 24.1% | 29.9% | 22.2% | 25.4% |
| C22orf36    | 388886 | 33.3% | 11.1% | 31.7% | 25.4% |
| OR2C1       | 4993   | 34.7% | 21.3% | 20.2% | 25.4% |
| CCR4        | 1233   | 27.8% | 23.4% | 25.0% | 25.4% |
| MAP3K15     | 389840 | 26.1% | 25.3% | 24.8% | 25.4% |
| KRTAP5-1    | 387264 | 31.8% | 19.7% | 24.7% | 25.4% |
| EXOC7       | 23265  | 35.0% | 13.4% | 27.8% | 25.4% |
| APCS        | 325    | 36.1% | 19.4% | 20.7% | 25.4% |
| GABPA       | 2551   | 23.2% | 25.0% | 28.0% | 25.4% |
| GKN1        | 56287  | 24.8% | 21.0% | 30.4% | 25.4% |
| GPR87       | 53836  | 32.4% | 19.2% | 24.6% | 25.4% |
| FABP7       | 2173   | 28.8% | 23.8% | 23.6% | 25.4% |
| FLJ25067    | 149840 | 27.5% | 27.5% | 21.2% | 25.4% |
| FLJ34512    | 124093 | 19.7% | 20.7% | 35.9% | 25.4% |
| SSR2        | 6746   | 27.6% | 23.8% | 24.8% | 25.4% |
| CD69        | 969    | 29.8% | 25.6% | 20.8% | 25.4% |
| SLC35E3     | 55508  | 38.5% | 14.4% | 23.4% | 25.4% |
| FLJ22222    | 79701  | 31.0% | 19.9% | 25.3% | 25.4% |
| B4GALNAC-T3 | 283358 | 29.6% | 20.6% | 26.1% | 25.4% |
| OR6S1       | 341799 | 22.1% | 31.1% | 23.0% | 25.4% |
| SLC30A7     | 148867 | 37.1% | 15.0% | 24.2% | 25.4% |
| CPXM        | 56265  | 24.3% | 34.1% | 17.8% | 25.4% |
| LOC348174   | 348174 | 29.8% | 25.4% | 21.0% | 25.4% |
| PANK3       | 79646  | 20.7% | 27.3% | 28.3% | 25.4% |
| PGBD4       | 161779 | 26.2% | 35.4% | 14.7% | 25.4% |
| LOC113655   | 113655 | 29.8% | 20.0% | 26.4% | 25.4% |
| FLJ32685    | 152110 | 26.4% | 29.4% | 20.5% | 25.4% |
| MYO15A      | 51168  | 22.9% | 23.1% | 30.2% | 25.4% |
| TMEM7       | 83597  | 22.0% | 17.4% | 36.9% | 25.4% |
| SPINK5L3    | 153218 | 33.2% | 22.4% | 20.7% | 25.4% |
| OR4F6       | 390648 | 19.7% | 23.8% | 32.8% | 25.4% |
| IL1F9       | 56300  | 24.6% | 28.3% | 23.4% | 25.4% |
| TMEM16C     | 63982  | 19.0% | 29.5% | 27.8% | 25.4% |
| MME         | 4311   | 25.6% | 27.5% | 23.1% | 25.4% |
| OTEX        | 158800 | 19.5% | 27.1% | 29.6% | 25.4% |
| NET1        | 10276  | 25.0% | 23.2% | 28.1% | 25.4% |
| GTFR2RD2B   | 389524 | 29.8% | 29.0% | 17.5% | 25.4% |
| ARV1        | 64801  | 27.6% | 17.1% | 31.6% | 25.4% |
| PDE6C       | 5146   | 30.2% | 20.7% | 25.4% | 25.4% |
| SH3KBP1     | 30011  | 24.3% | 26.0% | 26.0% | 25.4% |
| FHIT        | 2272   | 35.4% | 18.3% | 22.6% | 25.4% |
| MGC35169    | 121793 | 23.1% | 24.5% | 28.7% | 25.4% |
| THAP9       | 79725  | 38.4% | 17.9% | 19.9% | 25.4% |
| SNRK        | 54861  | 26.1% | 22.2% | 28.0% | 25.4% |
| GBAS        | 2631   | 33.9% | 29.1% | 13.2% | 25.4% |
| BAK1        | 578    | 34.0% | 18.4% | 23.9% | 25.4% |
| DTNB        | 1838   | 35.6% | 31.9% | 8.8%  | 25.4% |
| PNLIP       | 5406   | 25.4% | 34.1% | 16.7% | 25.4% |
| CLDN10      | 9071   | 31.6% | 29.5% | 15.2% | 25.4% |
| RPS6KA6     | 27330  | 20.7% | 21.3% | 34.3% | 25.4% |
| CLK3        | 1198   | 19.0% | 31.3% | 26.0% | 25.4% |
| SIT         | 27240  | 31.5% | 14.7% | 30.1% | 25.4% |
| ITM2C       | 81618  | 27.2% | 33.8% | 15.4% | 25.4% |
| FOXA1       | 3169   | 18.6% | 26.1% | 31.6% | 25.4% |
| ABCC3       | 8714   | 30.6% | 21.1% | 24.6% | 25.4% |
| RAD23B      | 5887   | 45.8% | 13.2% | 17.3% | 25.4% |
| TMEM24      | 9854   | 34.8% | 22.5% | 19.1% | 25.4% |
| MAP4K1      | 11184  | 26.3% | 22.7% | 27.3% | 25.4% |
| PCK1        | 5105   | 28.5% | 28.1% | 19.8% | 25.4% |
| KIAA1573    | 57685  | 20.5% | 18.8% | 37.0% | 25.4% |
| ABI2        | 10152  | 33.8% | 23.1% | 19.4% | 25.4% |
| OR8H2       | 390151 | 23.7% | 26.0% | 26.5% | 25.4% |
| FLJ38377    | 205147 | 28.2% | 19.9% | 28.2% | 25.4% |
| KIAA0406    | 9675   | 27.7% | 19.8% | 28.8% | 25.4% |

|               |        |       |       |       |       |
|---------------|--------|-------|-------|-------|-------|
| CDKN1B        | 1027   | 18.8% | 34.6% | 22.9% | 25.4% |
| FLN29         | 10906  | 25.2% | 24.9% | 26.3% | 25.4% |
| OR4K5         | 79317  | 28.9% | 19.6% | 27.8% | 25.4% |
| LAMA1         | 284217 | 20.2% | 30.6% | 25.6% | 25.4% |
| ODC-P         | 113451 | 41.2% | 18.5% | 16.6% | 25.4% |
| TSNAXIP1      | 55815  | 23.7% | 22.8% | 29.8% | 25.4% |
| FLJ38608      | 132228 | 22.5% | 17.7% | 36.1% | 25.4% |
| OLFM4         | 10562  | 21.1% | 25.8% | 29.5% | 25.4% |
| PRRX1         | 5396   | 31.2% | 21.5% | 23.6% | 25.5% |
| CTTNBP2       | 83992  | 28.7% | 21.2% | 26.5% | 25.5% |
| STC2          | 8614   | 36.9% | 22.7% | 16.7% | 25.5% |
| BLVRB         | 645    | 33.9% | 21.5% | 21.0% | 25.5% |
| PSPH          | 5723   | 33.5% | 19.3% | 23.5% | 25.5% |
| THOP1         | 7064   | 26.4% | 29.0% | 21.0% | 25.5% |
| KCNA6         | 3742   | 28.0% | 27.3% | 21.0% | 25.5% |
| RAD23A        | 5886   | 38.7% | 16.3% | 21.4% | 25.5% |
| SRPK2         | 6733   | 21.6% | 24.9% | 29.9% | 25.5% |
| SLC25A29      | 123096 | 33.7% | 12.3% | 30.4% | 25.5% |
| GPD2          | 2820   | 33.0% | 26.7% | 16.7% | 25.5% |
| TBX22         | 50945  | 35.4% | 21.4% | 19.5% | 25.5% |
| MAPK4         | 5596   | 21.7% | 24.9% | 29.8% | 25.5% |
| PARP1         | 142    | 33.0% | 23.0% | 20.3% | 25.5% |
| BCL2L10       | 10017  | 28.4% | 11.9% | 36.1% | 25.5% |
| RGS16         | 6004   | 41.2% | 17.8% | 17.4% | 25.5% |
| NDUFA5        | 4698   | 23.8% | 26.5% | 26.1% | 25.5% |
| SEMA5A        | 9037   | 28.2% | 20.3% | 27.9% | 25.5% |
| RAB11B        | 9230   | 25.5% | 29.6% | 21.3% | 25.5% |
| ACA1          | 30     | 26.6% | 27.2% | 22.6% | 25.5% |
| DUSP21        | 63904  | 23.8% | 32.6% | 20.0% | 25.5% |
| MRPS2         | 51116  | 36.5% | 21.1% | 18.8% | 25.5% |
| MAFF          | 23764  | 27.8% | 20.4% | 28.2% | 25.5% |
| SPATA5L1      | 79029  | 26.7% | 23.7% | 26.1% | 25.5% |
| MIST1         | 168620 | 21.7% | 14.1% | 40.6% | 25.5% |
| JPH2          | 57158  | 17.1% | 36.4% | 22.9% | 25.5% |
| BPIL1         | 80341  | 29.8% | 22.3% | 24.4% | 25.5% |
| ESRRB         | 2103   | 36.1% | 18.3% | 22.0% | 25.5% |
| DIA1          | 1727   | 41.7% | 19.5% | 15.2% | 25.5% |
| LOC152519     | 152519 | 14.5% | 24.4% | 37.6% | 25.5% |
| DCLRE1C       | 64421  | 28.7% | 21.3% | 26.3% | 25.5% |
| LOC161247     | 161247 | 30.7% | 25.0% | 20.8% | 25.5% |
| TNFRSF21      | 27242  | 34.2% | 18.0% | 24.3% | 25.5% |
| SERP1         | 27230  | 27.2% | 30.9% | 18.4% | 25.5% |
| TMPPRS11A     | 339967 | 33.6% | 13.1% | 29.8% | 25.5% |
| SLC10A6       | 345274 | 25.5% | 28.6% | 22.3% | 25.5% |
| FOXR2         | 139628 | 34.1% | 17.5% | 24.8% | 25.5% |
| POLRMT        | 5442   | 38.7% | 15.8% | 22.0% | 25.5% |
| RNF170        | 81790  | 33.8% | 12.3% | 30.3% | 25.5% |
| ALDOB         | 229    | 34.9% | 7.3%  | 34.3% | 25.5% |
| CTCF          | 140690 | 35.1% | 14.8% | 26.5% | 25.5% |
| GOLPH3L       | 55204  | 27.4% | 27.0% | 22.1% | 25.5% |
| SHH           | 6469   | 30.2% | 15.4% | 30.9% | 25.5% |
| JMID4         | 65094  | 35.1% | 19.3% | 22.1% | 25.5% |
| ZNF193        | 7746   | 38.8% | 17.5% | 20.1% | 25.5% |
| ABCA9         | 10350  | 34.1% | 19.4% | 22.9% | 25.5% |
| IQSEC1        | 9922   | 30.6% | 25.9% | 20.0% | 25.5% |
| AMD1          | 262    | 29.2% | 25.2% | 22.1% | 25.5% |
| HPCAL4        | 51440  | 19.1% | 24.4% | 33.0% | 25.5% |
| MMP8          | 4317   | 27.6% | 27.1% | 21.9% | 25.5% |
| DKFZP434L0117 | 64793  | 28.1% | 14.5% | 34.0% | 25.5% |
| FLJ40172      | 285051 | 23.2% | 29.4% | 23.9% | 25.5% |
| FLJ14466      | 84876  | 22.1% | 26.9% | 27.5% | 25.5% |
| C4BPA         | 722    | 34.3% | 21.8% | 20.4% | 25.5% |
| DDAH1         | 23576  | 35.9% | 14.6% | 26.0% | 25.5% |
| FLJ36754      | 285672 | 26.2% | 29.1% | 21.2% | 25.5% |
| BCAT2         | 587    | 25.3% | 25.0% | 26.2% | 25.5% |
| CENTA2        | 55803  | 27.6% | 25.3% | 23.6% | 25.5% |
| FLJ13391      | 84141  | 15.1% | 32.8% | 28.6% | 25.5% |
| FLJ20507      | 55654  | 26.7% | 14.7% | 35.0% | 25.5% |
| GAF1          | 26056  | 23.7% | 30.3% | 22.5% | 25.5% |
| SARS2         | 54938  | 22.7% | 18.6% | 35.3% | 25.5% |
| GP2           | 2813   | 28.9% | 27.0% | 20.6% | 25.5% |
| SNTB2         | 6645   | 36.6% | 20.5% | 19.5% | 25.5% |
| GOLGA8B       | 440270 | 30.9% | 23.7% | 22.0% | 25.5% |
| HTR3C         | 170572 | 36.2% | 7.9%  | 32.4% | 25.5% |
| MGC34032      | 204962 | 25.5% | 18.7% | 32.3% | 25.5% |
| GEMIN6        | 79833  | 29.5% | 21.3% | 25.8% | 25.5% |
| SPINK9        | 643394 | 34.1% | 20.7% | 21.8% | 25.5% |
| CASC3         | 22794  | 20.7% | 32.1% | 23.7% | 25.5% |
| C20ORF3       | 57136  | 36.4% | 21.9% | 18.2% | 25.5% |
| DNABJ7        | 150353 | 28.9% | 24.7% | 23.0% | 25.5% |
| FLJ45422      | 441140 | 20.2% | 29.3% | 27.0% | 25.5% |
| CPXM2         | 119587 | 26.5% | 21.0% | 29.1% | 25.5% |
| FBXL20        | 84961  | 32.3% | 18.5% | 25.8% | 25.5% |
| ZNF551        | 90233  | 38.6% | 23.4% | 14.5% | 25.5% |
| ENTPD8        | 377841 | 29.0% | 28.7% | 18.8% | 25.5% |
| SPRY3         | 10251  | 28.6% | 25.1% | 22.9% | 25.5% |
| ACTA1         | 58     | 39.9% | 24.9% | 11.8% | 25.5% |
| LOC139793     | 139793 | 22.2% | 31.3% | 23.1% | 25.5% |
| KIAA1434      | 56261  | 16.2% | 24.2% | 36.2% | 25.5% |
| EPB42         | 2038   | 28.3% | 23.1% | 25.1% | 25.5% |
| VMD2L2        | 266675 | 25.1% | 18.3% | 33.2% | 25.5% |
| ICAM1         | 3383   | 19.1% | 23.5% | 33.9% | 25.5% |
| BHLHB5        | 27319  | 29.8% | 23.7% | 23.2% | 25.5% |
| KIAA1958      | 158405 | 20.8% | 26.5% | 29.2% | 25.5% |
| MKL1          | 57591  | 29.6% | 22.4% | 24.5% | 25.5% |
| RALA          | 5898   | 31.1% | 15.3% | 30.2% | 25.5% |
| FAM35A        | 54537  | 23.3% | 30.1% | 23.2% | 25.5% |
| FLJ21945      | 80304  | 26.0% | 17.4% | 33.2% | 25.5% |

|              |           |       |       |       |       |
|--------------|-----------|-------|-------|-------|-------|
| FLJ31818     | 154743    | 22.6% | 25.6% | 28.4% | 25.5% |
| UBA2         | 10054     | 20.1% | 30.0% | 26.5% | 25.5% |
| LOC388931    | 388931    | 34.2% | 26.3% | 16.1% | 25.5% |
| KIAA1977     | 124401    | 24.2% | 13.4% | 39.0% | 25.5% |
| SPHAR        | 10638     | 29.4% | 18.0% | 29.1% | 25.5% |
| UBE2H        | 7328      | 23.2% | 20.6% | 32.8% | 25.5% |
| PLEKHB1      | 58473     | 32.3% | 16.1% | 28.2% | 25.5% |
| LOC388753    | 388753    | 27.0% | 22.4% | 27.1% | 25.5% |
| PIA53        | 10401     | 19.4% | 26.0% | 31.2% | 25.5% |
| RASEF        | 158158    | 28.5% | 30.5% | 17.5% | 25.5% |
| BTBD11       | 121551    | 31.1% | 26.2% | 19.3% | 25.5% |
| VIT          | 5212      | 29.5% | 23.2% | 24.0% | 25.5% |
| LOC400673    | 400673    | 22.2% | 15.5% | 38.9% | 25.5% |
| DEFB127      | 140850    | 28.0% | 27.1% | 21.5% | 25.5% |
| SLC13A2      | 9058      | 29.3% | 31.1% | 16.3% | 25.5% |
| SEC31L1      | 22872     | 29.2% | 26.2% | 21.2% | 25.5% |
| ORS5B12      | 390191    | 37.6% | 20.3% | 18.8% | 25.5% |
| SLC9A6       | 10479     | 28.4% | 25.8% | 22.4% | 25.5% |
| OR8B3        | 390271    | 20.2% | 30.6% | 25.9% | 25.5% |
| GPR113       | 165082    | 24.1% | 29.5% | 23.1% | 25.5% |
| MAS1L        | 116511    | 31.3% | 19.2% | 26.1% | 25.5% |
| ZNF645       | 158506    | 32.6% | 20.1% | 23.9% | 25.5% |
| MYO5C        | 55930     | 37.1% | 22.5% | 17.0% | 25.5% |
| GDF7         | 151449    | 26.7% | 25.8% | 24.1% | 25.5% |
| MGC33894     | 256302    | 19.6% | 30.3% | 26.8% | 25.5% |
| TCFL4        | 6945      | 40.4% | 14.1% | 22.2% | 25.5% |
| CTHRC1       | 115908    | 33.9% | 20.3% | 22.5% | 25.5% |
| PPM1G        | 5496      | 25.5% | 28.5% | 22.7% | 25.6% |
| SIRPB1       | 10326     | 22.3% | 24.6% | 29.7% | 25.6% |
| ADAM21       | 8747      | 28.7% | 19.6% | 28.4% | 25.6% |
| DLNB14       | 338657    | 15.4% | 34.5% | 26.7% | 25.6% |
| SPANX-N4     | 441525    | 21.7% | 17.0% | 38.0% | 25.6% |
| FRZB         | 2487      | 30.0% | 26.9% | 19.8% | 25.6% |
| PEX16        | 9409      | 31.9% | 16.3% | 28.5% | 25.6% |
| AZ11         | 22994     | 29.1% | 21.9% | 25.7% | 25.6% |
| LOC653404    | 653404    | 24.8% | 25.8% | 26.0% | 25.6% |
| HADHB        | 3032      | 28.5% | 21.1% | 27.0% | 25.6% |
| MONDOA       | 22877     | 20.6% | 29.6% | 26.5% | 25.6% |
| HDAC4        | 9759      | 29.0% | 27.9% | 19.8% | 25.6% |
| ERAF         | 51327     | 27.0% | 21.9% | 27.7% | 25.6% |
| LOC100132247 | 100132247 | 20.1% | 30.1% | 26.5% | 25.6% |
| LGICZ        | 353174    | 21.8% | 30.7% | 24.3% | 25.6% |
| SMARCA1      | 6594      | 32.5% | 29.9% | 14.3% | 25.6% |
| PAPSS1       | 9061      | 34.0% | 19.2% | 23.5% | 25.6% |
| SIK2         | 23235     | 21.7% | 27.6% | 27.5% | 25.6% |
| IL12RB2      | 3595      | 31.5% | 16.8% | 28.3% | 25.6% |
| USP43        | 124739    | 35.1% | 15.8% | 25.8% | 25.6% |
| BMF          | 90427     | 36.0% | 20.1% | 20.6% | 25.6% |
| RAB26        | 25837     | 45.4% | 15.4% | 16.0% | 25.6% |
| LOC132321    | 132321    | 26.1% | 25.6% | 25.0% | 25.6% |
| LUM          | 4060      | 30.6% | 28.8% | 17.3% | 25.6% |
| GAMT         | 2593      | 33.2% | 19.4% | 24.1% | 25.6% |
| KLKB1        | 3818      | 41.5% | 12.7% | 22.5% | 25.6% |
| ZC3HDC1      | 64761     | 26.5% | 20.7% | 29.5% | 25.6% |
| OXR1         | 55074     | 29.8% | 32.6% | 14.4% | 25.6% |
| LRRK2        | 120892    | 25.1% | 28.7% | 22.9% | 25.6% |
| WBSCR28      | 135886    | 39.9% | 21.0% | 15.9% | 25.6% |
| OR5H1        | 26341     | 36.5% | 19.3% | 20.9% | 25.6% |
| ALOX12       | 239       | 29.3% | 15.3% | 32.2% | 25.6% |
| OR4K13       | 390433    | 24.4% | 24.4% | 28.0% | 25.6% |
| PRDM13       | 59336     | 32.8% | 17.5% | 26.4% | 25.6% |
| OR11H4       | 390442    | 33.3% | 14.8% | 28.6% | 25.6% |
| FLJ35779     | 134359    | 27.5% | 23.1% | 26.1% | 25.6% |
| WDR21        | 26094     | 26.2% | 19.1% | 31.4% | 25.6% |
| DEFB124      | 245937    | 32.6% | 21.1% | 23.1% | 25.6% |
| MMP1         | 4312      | 27.3% | 27.9% | 21.5% | 25.6% |
| AFMID        | 125061    | 30.9% | 18.8% | 27.1% | 25.6% |
| LOC619208    | 619208    | 30.7% | 21.7% | 24.4% | 25.6% |
| TIMM9        | 26520     | 40.1% | 21.8% | 14.7% | 25.6% |
| LOC125893    | 125893    | 26.2% | 15.7% | 34.9% | 25.6% |
| MBNL1        | 4154      | 26.2% | 27.1% | 23.5% | 25.6% |
| ZDHC16       | 84287     | 29.7% | 25.0% | 22.0% | 25.6% |
| SN           | 6614      | 28.3% | 13.5% | 35.0% | 25.6% |
| COX6B2       | 125965    | 25.2% | 23.9% | 27.7% | 25.6% |
| PPP2R1B      | 5519      | 26.1% | 29.9% | 20.8% | 25.6% |
| LOC132203    | 132203    | 17.2% | 33.7% | 25.9% | 25.6% |
| OR1M1        | 125963    | 34.1% | 26.0% | 16.7% | 25.6% |
| SPHK1        | 8877      | 23.2% | 21.2% | 32.4% | 25.6% |
| SGTB         | 54557     | 22.6% | 30.5% | 23.6% | 25.6% |
| MFAP3        | 4238      | 43.0% | 14.3% | 19.4% | 25.6% |
| LOC283551    | 283551    | 28.6% | 19.6% | 28.6% | 25.6% |
| ASAH1        | 427       | 14.3% | 25.0% | 37.5% | 25.6% |
| PCSK4        | 54760     | 32.5% | 25.2% | 19.1% | 25.6% |
| USF1         | 7391      | 31.8% | 18.7% | 26.3% | 25.6% |
| AMOTL2       | 51421     | 33.1% | 21.8% | 21.8% | 25.6% |
| RXFP4        | 339403    | 20.6% | 30.7% | 25.5% | 25.6% |
| CLDN19       | 149461    | 28.3% | 21.4% | 27.1% | 25.6% |
| DOT1L        | 84444     | 29.3% | 26.7% | 20.8% | 25.6% |
| HES6         | 55502     | 36.0% | 21.3% | 19.4% | 25.6% |
| HM13         | 81502     | 26.6% | 22.6% | 27.7% | 25.6% |
| LOC223075    | 223075    | 23.3% | 14.1% | 39.4% | 25.6% |
| SPOP         | 8405      | 29.7% | 23.7% | 23.4% | 25.6% |
| SKIP         | 80309     | 25.3% | 21.7% | 29.7% | 25.6% |
| PDYN         | 5173      | 40.2% | 11.7% | 24.8% | 25.6% |
| BZRAP1       | 9256      | 28.2% | 27.2% | 21.4% | 25.6% |
| NDUFB4       | 4710      | 23.4% | 18.5% | 35.0% | 25.6% |
| LAT          | 27040     | 37.8% | 24.5% | 14.5% | 25.6% |
| ELOVL6       | 79071     | 43.5% | 11.6% | 21.8% | 25.6% |

|              |        |       |       |       |       |
|--------------|--------|-------|-------|-------|-------|
| PHIP         | 55023  | 37.1% | 16.4% | 23.3% | 25.6% |
| FOX1         | 2299   | 29.7% | 14.7% | 32.4% | 25.6% |
| MOBK12B      | 79817  | 43.3% | 9.0%  | 24.6% | 25.6% |
| HBXIP        | 10542  | 34.9% | 20.1% | 21.8% | 25.6% |
| KRTAP12-1    | 353332 | 15.8% | 29.6% | 31.5% | 25.6% |
| LOC139067    | 139067 | 27.8% | 17.5% | 31.5% | 25.6% |
| TRALPUSH     | 116931 | 32.4% | 19.6% | 24.8% | 25.6% |
| LOC389941    | 389941 | 19.1% | 20.9% | 36.9% | 25.6% |
| CHST9        | 83539  | 33.5% | 17.2% | 26.1% | 25.6% |
| C6ORF47      | 57827  | 28.1% | 17.0% | 31.7% | 25.6% |
| IL1RL1LG     | 11018  | 22.2% | 30.8% | 23.9% | 25.6% |
| SLC4A9       | 83697  | 32.4% | 23.8% | 20.7% | 25.6% |
| ZNF253       | 56242  | 22.0% | 23.6% | 31.3% | 25.6% |
| RANBP9       | 10048  | 32.3% | 15.4% | 29.2% | 25.6% |
| MGC13034     | 134288 | 26.3% | 30.3% | 20.2% | 25.6% |
| RBP5         | 83758  | 38.5% | 20.6% | 17.7% | 25.6% |
| LOC158830    | 158830 | 28.8% | 24.9% | 23.1% | 25.6% |
| MS4A8B       | 83661  | 33.9% | 20.2% | 22.7% | 25.6% |
| FLJ25339     | 221191 | 35.7% | 24.1% | 17.0% | 25.6% |
| RHBD1        | 9028   | 36.0% | 12.2% | 28.7% | 25.6% |
| HIRIP5       | 27247  | 40.2% | 15.9% | 20.7% | 25.6% |
| RAB9A        | 9367   | 29.1% | 26.7% | 21.1% | 25.6% |
| SMARCA2      | 6595   | 28.8% | 27.0% | 21.0% | 25.6% |
| SYNJ2BP      | 55333  | 21.4% | 24.4% | 31.1% | 25.6% |
| RBM17        | 84991  | 43.2% | 10.5% | 23.1% | 25.6% |
| TDRD7        | 23424  | 27.3% | 23.8% | 25.8% | 25.6% |
| MDS006       | 56985  | 23.2% | 18.7% | 34.9% | 25.6% |
| ANKRD50      | 57182  | 18.7% | 22.8% | 35.4% | 25.6% |
| RAB3GAP1     | 22930  | 25.5% | 26.6% | 24.8% | 25.6% |
| TRNT1        | 51095  | 40.3% | 12.2% | 24.4% | 25.6% |
| CYB5R2       | 51700  | 35.6% | 21.3% | 19.9% | 25.6% |
| GRIP2        | 80852  | 30.9% | 13.1% | 32.9% | 25.6% |
| BMPR2        | 659    | 15.3% | 30.2% | 31.4% | 25.6% |
| FLJ11730     | 64769  | 25.2% | 25.5% | 26.2% | 25.6% |
| CGI-49       | 51097  | 22.5% | 24.1% | 30.3% | 25.6% |
| CXORF53      | 79184  | 19.0% | 17.1% | 40.8% | 25.6% |
| COL6A1       | 1291   | 31.0% | 18.2% | 27.7% | 25.6% |
| VPREB1       | 7441   | 39.8% | 17.8% | 19.3% | 25.6% |
| C14ORF147    | 171546 | 19.4% | 33.6% | 24.0% | 25.6% |
| COL7A1       | 1294   | 20.6% | 26.8% | 29.5% | 25.6% |
| HYDIN        | 54768  | 30.9% | 19.8% | 26.2% | 25.6% |
| CCT4         | 10575  | 43.1% | 17.7% | 16.1% | 25.6% |
| LOC653121    | 653121 | 19.4% | 24.8% | 32.7% | 25.6% |
| JMJ1D1A      | 55818  | 23.5% | 24.4% | 29.1% | 25.6% |
| CT45-1       | 541466 | 29.8% | 26.6% | 20.6% | 25.6% |
| P29          | 25949  | 29.0% | 20.6% | 27.3% | 25.6% |
| SPCS1        | 28972  | 33.3% | 18.4% | 25.2% | 25.6% |
| G6PC2        | 57818  | 30.5% | 27.0% | 19.5% | 25.7% |
| ADAMTS9      | 56999  | 28.8% | 26.0% | 22.3% | 25.7% |
| POUF1        | 5463   | 23.4% | 31.2% | 22.4% | 25.7% |
| FLJ25467     | 152206 | 22.1% | 22.8% | 32.1% | 25.7% |
| ZNF334       | 55713  | 25.0% | 18.9% | 33.1% | 25.7% |
| TEX15        | 56154  | 38.4% | 18.2% | 20.4% | 25.7% |
| C7ORF10      | 79783  | 30.9% | 14.5% | 31.6% | 25.7% |
| ZBTB11       | 27107  | 20.7% | 26.4% | 29.9% | 25.7% |
| PAFAH1B3     | 5050   | 33.4% | 24.5% | 19.0% | 25.7% |
| PRDM14       | 63978  | 38.1% | 12.5% | 26.4% | 25.7% |
| TNFAIP3      | 7128   | 35.3% | 17.2% | 24.4% | 25.7% |
| HGD          | 3081   | 29.1% | 21.2% | 26.7% | 25.7% |
| IMPDH1       | 3614   | 34.6% | 14.9% | 27.5% | 25.7% |
| TP53INP1     | 94241  | 26.7% | 30.5% | 19.7% | 25.7% |
| BCM1O1       | 53630  | 33.1% | 25.1% | 18.8% | 25.7% |
| IL17F        | 112744 | 23.8% | 25.3% | 27.8% | 25.7% |
| AGPS         | 8540   | 35.7% | 17.8% | 23.4% | 25.7% |
| GLT6D1       | 360203 | 34.9% | 23.5% | 18.6% | 25.7% |
| RP6-213H19.1 | 51765  | 21.0% | 26.3% | 29.7% | 25.7% |
| ADAMTS19     | 171019 | 27.5% | 18.9% | 30.6% | 25.7% |
| DRB1         | 129831 | 16.5% | 33.3% | 27.2% | 25.7% |
| MGC24047     | 149563 | 28.3% | 24.3% | 24.4% | 25.7% |
| GUCA1C       | 9626   | 36.8% | 20.6% | 19.6% | 25.7% |
| HP55         | 11234  | 28.0% | 25.7% | 23.3% | 25.7% |
| C9ORF43      | 257169 | 31.2% | 15.3% | 30.5% | 25.7% |
| FLJ46079     | 440307 | 24.5% | 23.0% | 29.5% | 25.7% |
| MYO6         | 4646   | 25.2% | 29.1% | 22.6% | 25.7% |
| KCTD8        | 386617 | 42.5% | 10.8% | 23.7% | 25.7% |
| IL10RB       | 3588   | 36.9% | 14.7% | 25.5% | 25.7% |
| TBC1D21      | 161514 | 29.8% | 23.1% | 24.0% | 25.7% |
| LRR1C16      | 55604  | 27.7% | 30.4% | 19.0% | 25.7% |
| RP11-11C5.2  | 440145 | 35.9% | 19.0% | 22.1% | 25.7% |
| PCGF6        | 84108  | 41.0% | 20.9% | 15.1% | 25.7% |
| XPO5         | 57510  | 37.3% | 18.6% | 21.2% | 25.7% |
| ARFGF2       | 10564  | 17.5% | 35.6% | 23.9% | 25.7% |
| PYGL         | 5836   | 42.6% | 18.6% | 15.9% | 25.7% |
| KRTAP5-11    | 440051 | 28.8% | 23.1% | 25.1% | 25.7% |
| CYP2C19      | 1557   | 34.8% | 18.5% | 23.7% | 25.7% |
| MAP1LC3B     | 81631  | 35.7% | 18.9% | 22.4% | 25.7% |
| GSTM1        | 2944   | 26.3% | 25.2% | 25.6% | 25.7% |
| MRPS18A      | 55168  | 25.3% | 24.8% | 27.0% | 25.7% |
| LIN7A        | 8825   | 29.3% | 19.7% | 28.1% | 25.7% |
| RTEL1        | 51750  | 42.3% | 11.9% | 22.8% | 25.7% |
| KIAA1904     | 114794 | 25.0% | 26.0% | 26.1% | 25.7% |
| TBC1D13      | 54662  | 17.7% | 34.8% | 24.5% | 25.7% |
| USP12        | 219333 | 33.1% | 22.8% | 21.1% | 25.7% |
| KIAA0140     | 9679   | 17.2% | 29.6% | 30.2% | 25.7% |
| FLJ21742     | 84167  | 19.7% | 27.4% | 29.9% | 25.7% |
| BTBD5        | 54813  | 21.4% | 19.5% | 36.1% | 25.7% |
| COL4A5       | 1287   | 29.3% | 17.0% | 30.8% | 25.7% |
| DKFZP434C171 | 26112  | 20.5% | 32.5% | 24.1% | 25.7% |

|              |        |       |       |       |       |
|--------------|--------|-------|-------|-------|-------|
| DNMT1        | 1786   | 30.0% | 22.3% | 24.7% | 25.7% |
| TNNT3        | 7140   | 30.0% | 24.7% | 22.4% | 25.7% |
| CCR7         | 1236   | 27.2% | 17.1% | 32.7% | 25.7% |
| PSCD1        | 9267   | 41.2% | 16.7% | 19.2% | 25.7% |
| TDO2         | 6999   | 26.9% | 26.8% | 23.5% | 25.7% |
| DKFZP761B107 | 91050  | 47.1% | 17.8% | 12.2% | 25.7% |
| PKP1         | 5317   | 33.5% | 23.0% | 20.6% | 25.7% |
| GALP         | 85569  | 35.8% | 28.7% | 12.6% | 25.7% |
| DCLRE1A      | 9937   | 23.6% | 28.2% | 25.4% | 25.7% |
| HNRPA1       | 3178   | 35.0% | 20.0% | 22.1% | 25.7% |
| C14ORF32     | 93487  | 37.1% | 26.9% | 13.0% | 25.7% |
| RBL1         | 5933   | 23.2% | 28.3% | 25.6% | 25.7% |
| NCOA5        | 57727  | 25.6% | 16.4% | 35.1% | 25.7% |
| MST1         | 4485   | 28.3% | 29.6% | 19.2% | 25.7% |
| NDUF81       | 4707   | 38.6% | 11.8% | 26.7% | 25.7% |
| PRTN3        | 5657   | 25.3% | 29.0% | 22.8% | 25.7% |
| AMMECR1      | 9949   | 23.3% | 29.5% | 24.3% | 25.7% |
| C6ORF108     | 10591  | 34.8% | 18.8% | 23.4% | 25.7% |
| MMAA         | 166785 | 26.6% | 22.7% | 27.7% | 25.7% |
| CSTF2        | 1478   | 31.2% | 18.9% | 27.1% | 25.7% |
| LOC348180    | 348180 | 34.2% | 27.3% | 15.6% | 25.7% |
| COMMD6       | 170622 | 31.3% | 22.4% | 23.4% | 25.7% |
| TRADD        | 8717   | 37.7% | 15.1% | 24.3% | 25.7% |
| TRIM41       | 90933  | 27.3% | 22.9% | 26.8% | 25.7% |
| MGC10744     | 84314  | 26.8% | 12.6% | 37.7% | 25.7% |
| C1ORF8       | 9528   | 23.6% | 22.0% | 31.4% | 25.7% |
| CKLFSF8      | 152189 | 21.7% | 29.3% | 26.0% | 25.7% |
| MPHOSPH10    | 10199  | 27.9% | 27.5% | 21.8% | 25.7% |
| FLJ25955     | 164781 | 23.6% | 19.2% | 34.4% | 25.7% |
| GPC6         | 10082  | 42.3% | 25.7% | 9.1%  | 25.7% |
| FLJ32949     | 283417 | 20.0% | 16.1% | 41.0% | 25.7% |
| KIAA1217     | 56243  | 35.8% | 28.0% | 13.3% | 25.7% |
| COL5A1       | 1289   | 29.7% | 20.2% | 27.2% | 25.7% |
| CCL19        | 6363   | 33.2% | 22.6% | 21.3% | 25.7% |
| INSM2        | 84684  | 31.3% | 21.3% | 24.6% | 25.7% |
| FLJ13119     | 79631  | 32.6% | 20.6% | 23.9% | 25.7% |
| GNA15        | 2769   | 28.3% | 21.4% | 27.4% | 25.7% |
| B2M          | 567    | 35.6% | 15.0% | 26.4% | 25.7% |
| SE57-1       | 80323  | 23.1% | 20.9% | 33.1% | 25.7% |
| KIAA0404     | 23130  | 28.8% | 24.2% | 24.2% | 25.7% |
| RHBF1        | 64285  | 24.5% | 29.2% | 23.4% | 25.7% |
| CBX6         | 23466  | 29.4% | 22.2% | 25.6% | 25.7% |
| FLRT1        | 23769  | 28.7% | 21.6% | 26.9% | 25.7% |
| MYST3        | 7994   | 33.3% | 15.3% | 28.5% | 25.7% |
| IBTK         | 25998  | 35.8% | 31.1% | 10.2% | 25.7% |
| C6ORF82      | 51596  | 28.4% | 17.0% | 31.7% | 25.7% |
| KLF4         | 9314   | 35.0% | 19.7% | 22.4% | 25.7% |
| UBE3B        | 89910  | 29.8% | 17.4% | 30.0% | 25.7% |
| PNPO         | 55163  | 33.1% | 22.8% | 21.3% | 25.7% |
| TXNDC5       | 81567  | 26.9% | 20.8% | 29.4% | 25.7% |
| USP53        | 54532  | 34.4% | 14.2% | 28.5% | 25.7% |
| PAQR6        | 79957  | 24.8% | 26.7% | 25.6% | 25.7% |
| ZNF609       | 23060  | 28.2% | 23.4% | 25.5% | 25.7% |
| RAB12        | 201475 | 34.3% | 20.2% | 22.6% | 25.7% |
| GC           | 2638   | 23.0% | 25.5% | 28.7% | 25.7% |
| UBB          | 7314   | 39.1% | 16.5% | 21.5% | 25.7% |
| GOT2         | 2806   | 26.9% | 28.4% | 21.8% | 25.7% |
| BMS1L        | 9790   | 29.1% | 24.1% | 24.0% | 25.7% |
| STK38L       | 23012  | 34.1% | 23.2% | 19.9% | 25.7% |
| MESDC2       | 23184  | 27.2% | 24.7% | 25.2% | 25.7% |
| PMAIP1       | 5366   | 19.0% | 26.7% | 31.5% | 25.7% |
| CDCP1        | 64866  | 26.7% | 21.7% | 28.7% | 25.7% |
| SLC25A15     | 10166  | 32.5% | 17.5% | 27.2% | 25.7% |
| LCN9         | 392399 | 40.7% | 19.7% | 16.7% | 25.7% |
| LOC339977    | 339977 | 31.2% | 22.8% | 23.2% | 25.7% |
| DCUN1D2      | 55208  | 34.0% | 17.8% | 25.4% | 25.7% |
| SREBF1       | 6720   | 34.6% | 26.2% | 16.4% | 25.7% |
| CIRBP        | 1153   | 24.5% | 25.0% | 27.7% | 25.7% |
| SLC11A2      | 4891   | 26.7% | 22.9% | 27.6% | 25.7% |
| ASAH3L       | 340485 | 30.8% | 17.4% | 29.0% | 25.7% |
| WBSCR20A     | 55695  | 25.0% | 21.8% | 30.4% | 25.7% |
| LASS3        | 204219 | 27.3% | 27.1% | 22.8% | 25.7% |
| FLJ20531     | 55657  | 15.0% | 32.9% | 29.3% | 25.7% |
| FLJ14803     | 84928  | 21.7% | 28.3% | 27.2% | 25.7% |
| SEPP1        | 6414   | 25.5% | 32.7% | 19.0% | 25.7% |
| OR6B2        | 389090 | 38.2% | 17.7% | 21.3% | 25.7% |
| SRD5A2L      | 79644  | 28.8% | 18.5% | 29.9% | 25.7% |
| PPP2CB       | 5516   | 36.0% | 25.6% | 15.6% | 25.7% |
| TDRD1        | 56165  | 16.9% | 32.7% | 27.5% | 25.7% |
| SNAP23       | 8773   | 27.4% | 23.9% | 25.9% | 25.7% |
| LOC401944    | 401944 | 27.3% | 27.5% | 22.4% | 25.7% |
| KIAA1608     | 57706  | 25.6% | 27.2% | 24.4% | 25.7% |
| FLJ10700     | 55731  | 16.3% | 30.5% | 30.5% | 25.7% |
| GK           | 2710   | 25.7% | 23.2% | 28.3% | 25.7% |
| LOC131076    | 131076 | 32.4% | 11.1% | 33.8% | 25.7% |
| RFWD2        | 64326  | 32.9% | 23.3% | 21.0% | 25.7% |
| LOC729974    | 729974 | 24.6% | 14.3% | 38.3% | 25.7% |
| STARD6       | 147323 | 33.3% | 19.2% | 24.7% | 25.7% |
| SLC38A2      | 54407  | 32.3% | 22.2% | 22.8% | 25.7% |
| MGC13159     | 85013  | 21.7% | 17.6% | 37.9% | 25.7% |
| TBX18        | 9096   | 27.5% | 17.6% | 32.2% | 25.7% |
| SMARCC2      | 6601   | 39.3% | 21.2% | 16.8% | 25.7% |
| SITPEC       | 51295  | 26.1% | 11.1% | 40.0% | 25.7% |
| WSB1         | 26118  | 30.8% | 20.9% | 25.6% | 25.7% |
| NIT2         | 56954  | 26.8% | 16.7% | 33.7% | 25.8% |
| MPRG         | 54852  | 37.1% | 25.7% | 14.5% | 25.8% |
| KRT6E        | 286887 | 17.0% | 26.2% | 34.1% | 25.8% |
| PDE1C        | 5137   | 24.8% | 20.9% | 31.6% | 25.8% |

|              |        |       |       |       |       |
|--------------|--------|-------|-------|-------|-------|
| GAS6         | 2621   | 19.6% | 33.8% | 23.9% | 25.8% |
| PTAFR        | 5724   | 31.5% | 23.6% | 22.2% | 25.8% |
| NR6A1        | 2649   | 33.4% | 33.4% | 11.7% | 25.8% |
| LOC730394    | 730394 | 36.3% | 22.3% | 18.7% | 25.8% |
| SLC7A5       | 8140   | 35.5% | 22.8% | 19.0% | 25.8% |
| OR2T11       | 127077 | 28.8% | 25.5% | 23.0% | 25.8% |
| FRB21        | 360023 | 18.5% | 28.5% | 30.3% | 25.8% |
| RAC3         | 5881   | 33.7% | 21.7% | 21.9% | 25.8% |
| LPPR4        | 9890   | 19.7% | 37.8% | 19.8% | 25.8% |
| ROS1         | 6098   | 20.1% | 31.0% | 26.2% | 25.8% |
| FLJ20422     | 54929  | 18.1% | 22.1% | 37.1% | 25.8% |
| FLJ45831     | 400576 | 23.1% | 25.6% | 28.6% | 25.8% |
| SI           | 6476   | 32.2% | 17.1% | 28.0% | 25.8% |
| AMIGO2       | 347902 | 28.3% | 25.3% | 23.6% | 25.8% |
| PIPSK1C      | 23396  | 22.6% | 25.6% | 29.1% | 25.8% |
| S100Z        | 170591 | 30.7% | 18.3% | 28.3% | 25.8% |
| SULT2B1      | 6820   | 31.1% | 17.4% | 28.8% | 25.8% |
| N-PAC        | 84656  | 24.6% | 30.7% | 22.1% | 25.8% |
| BMP2K        | 55589  | 24.4% | 22.8% | 30.1% | 25.8% |
| FLJ38819     | 257629 | 19.7% | 17.4% | 40.2% | 25.8% |
| KRTAP19-3    | 337970 | 35.1% | 16.2% | 26.0% | 25.8% |
| MGMT         | 4255   | 32.0% | 18.3% | 27.1% | 25.8% |
| TNFRSF4      | 7293   | 25.5% | 24.0% | 27.9% | 25.8% |
| TXNIP        | 10628  | 28.7% | 23.2% | 25.4% | 25.8% |
| ACCN4        | 55515  | 34.9% | 23.6% | 18.9% | 25.8% |
| CAMK4        | 814    | 29.1% | 23.3% | 25.0% | 25.8% |
| C1ORF14      | 81626  | 29.1% | 28.0% | 20.2% | 25.8% |
| AKR1D1       | 6718   | 35.3% | 21.3% | 20.8% | 25.8% |
| ZNF30        | 90075  | 40.7% | 18.5% | 18.1% | 25.8% |
| INSL5        | 10022  | 38.9% | 16.4% | 22.1% | 25.8% |
| LCN2         | 3934   | 27.4% | 27.6% | 22.3% | 25.8% |
| PRO1853      | 55471  | 35.6% | 19.3% | 22.5% | 25.8% |
| FLJ21816     | 79728  | 36.2% | 21.2% | 19.9% | 25.8% |
| ZNF431       | 170959 | 17.2% | 34.1% | 26.1% | 25.8% |
| NANOS2       | 339345 | 22.0% | 24.7% | 30.7% | 25.8% |
| LOC91966     | 91966  | 29.1% | 27.1% | 21.2% | 25.8% |
| RPN2         | 6185   | 33.0% | 23.6% | 20.8% | 25.8% |
| C1ORF33      | 51154  | 31.3% | 21.4% | 24.6% | 25.8% |
| MGC29814     | 283991 | 27.3% | 28.3% | 21.8% | 25.8% |
| NEDD4        | 4734   | 27.8% | 25.5% | 24.0% | 25.8% |
| NPTX2        | 4885   | 27.6% | 22.9% | 26.9% | 25.8% |
| FLJ39421     | 284185 | 15.3% | 19.0% | 43.0% | 25.8% |
| MTHFR        | 4524   | 28.7% | 18.9% | 29.8% | 25.8% |
| AIP1         | 9863   | 16.7% | 25.0% | 35.7% | 25.8% |
| OR4F21       | 441308 | 26.7% | 25.7% | 25.0% | 25.8% |
| C14ORF115    | 55237  | 22.8% | 27.3% | 27.3% | 25.8% |
| ZMYND17      | 118490 | 28.4% | 30.8% | 18.2% | 25.8% |
| BMP10        | 27302  | 33.3% | 28.2% | 15.8% | 25.8% |
| KIAA1221     | 84146  | 25.4% | 28.0% | 24.0% | 25.8% |
| MGC15875     | 85007  | 24.6% | 33.1% | 19.7% | 25.8% |
| SORL1        | 6653   | 33.3% | 24.5% | 19.5% | 25.8% |
| C7ORF28B     | 221960 | 29.3% | 24.2% | 23.9% | 25.8% |
| DHX30        | 22907  | 32.6% | 21.9% | 22.9% | 25.8% |
| USF2         | 7392   | 41.9% | 16.2% | 19.3% | 25.8% |
| REM1         | 28954  | 20.9% | 29.0% | 27.5% | 25.8% |
| C8orf22      | 492307 | 36.9% | 22.8% | 17.7% | 25.8% |
| MAP2K2       | 5605   | 26.7% | 33.8% | 16.9% | 25.8% |
| YIPF6        | 286451 | 32.5% | 25.3% | 19.7% | 25.8% |
| SUMF1        | 285362 | 35.8% | 21.8% | 19.8% | 25.8% |
| IFRD1        | 3475   | 41.6% | 12.6% | 23.2% | 25.8% |
| FLJ36601     | 286464 | 28.4% | 23.0% | 26.0% | 25.8% |
| LOC644150    | 644150 | 23.7% | 28.6% | 25.2% | 25.8% |
| KIAA0555     | 9832   | 24.2% | 15.7% | 37.5% | 25.8% |
| S100A6       | 6277   | 20.6% | 30.1% | 26.7% | 25.8% |
| C10ORF4      | 118924 | 31.1% | 26.7% | 19.5% | 25.8% |
| SPARC        | 6678   | 31.3% | 22.9% | 23.3% | 25.8% |
| SRP19        | 6728   | 28.0% | 26.7% | 22.7% | 25.8% |
| NRCAM        | 4897   | 36.4% | 16.6% | 24.5% | 25.8% |
| ADAMTS3      | 9508   | 21.9% | 32.0% | 23.5% | 25.8% |
| LOC116143    | 116143 | 30.4% | 25.3% | 21.7% | 25.8% |
| FLJ30058     | 158763 | 32.4% | 20.0% | 25.0% | 25.8% |
| PLSCR4       | 57088  | 38.7% | 13.2% | 25.5% | 25.8% |
| ERMAP        | 114625 | 28.7% | 27.3% | 21.5% | 25.8% |
| ZFYVE27      | 118813 | 34.8% | 19.1% | 23.5% | 25.8% |
| NSD1         | 64324  | 30.2% | 24.2% | 23.0% | 25.8% |
| DHR57        | 51635  | 25.3% | 28.7% | 23.4% | 25.8% |
| RBMY1D       | 378949 | 31.5% | 20.2% | 25.8% | 25.8% |
| PTK7         | 5754   | 25.6% | 26.3% | 25.6% | 25.8% |
| CYBA         | 1535   | 37.1% | 24.1% | 16.3% | 25.8% |
| HPN          | 3249   | 28.9% | 19.9% | 28.7% | 25.8% |
| DKFZP434H132 | 56905  | 24.0% | 17.3% | 36.2% | 25.8% |
| SFTPA2       | 6436   | 28.4% | 19.4% | 29.7% | 25.8% |
| DFFB         | 1677   | 27.7% | 24.4% | 25.3% | 25.8% |
| ITGAX        | 3687   | 34.6% | 19.6% | 23.3% | 25.8% |
| TUB          | 7275   | 26.3% | 21.8% | 29.4% | 25.8% |
| PFKL         | 5211   | 18.6% | 33.5% | 25.3% | 25.8% |
| MCTS1        | 28985  | 34.2% | 11.9% | 31.3% | 25.8% |
| LHFPL2       | 10184  | 42.9% | 17.9% | 16.7% | 25.8% |
| TACC2        | 10579  | 31.3% | 16.2% | 30.0% | 25.8% |
| CEACAM8      | 1088   | 22.6% | 23.2% | 31.7% | 25.8% |
| CECR6        | 27439  | 34.0% | 28.0% | 15.5% | 25.8% |
| CNNM2        | 54805  | 20.5% | 40.9% | 16.0% | 25.8% |
| DLL1         | 28514  | 21.3% | 18.2% | 37.9% | 25.8% |
| LYPD2        | 137797 | 28.1% | 21.3% | 28.1% | 25.8% |
| OR13C3       | 138803 | 24.1% | 19.8% | 33.6% | 25.8% |
| MAFG         | 4097   | 39.6% | 18.2% | 19.7% | 25.8% |
| IFIT1L       | 439996 | 29.2% | 22.5% | 25.8% | 25.8% |
| USP21        | 27005  | 24.4% | 30.8% | 22.3% | 25.8% |



|           |        |       |       |       |       |
|-----------|--------|-------|-------|-------|-------|
| CST2      | 1470   | 23.7% | 23.4% | 30.4% | 25.8% |
| FLJ25818  | 146779 | 23.6% | 13.6% | 40.2% | 25.8% |
| CABLES2   | 81928  | 38.5% | 27.3% | 11.6% | 25.8% |
| FBLN1     | 2192   | 15.7% | 37.2% | 24.6% | 25.8% |
| KLF2      | 10365  | 28.4% | 25.9% | 23.1% | 25.8% |
| MLF1      | 4291   | 33.6% | 11.7% | 32.2% | 25.8% |
| MOBP      | 4336   | 34.6% | 16.3% | 26.7% | 25.8% |
| MYRIP     | 25924  | 36.0% | 19.9% | 21.6% | 25.8% |
| TREH      | 11181  | 40.6% | 10.0% | 26.9% | 25.8% |
| CDGAP     | 57514  | 45.0% | 14.5% | 18.0% | 25.8% |
| SIMP      | 201595 | 27.6% | 29.7% | 20.3% | 25.8% |
| DEFB107A  | 245910 | 22.9% | 25.0% | 29.6% | 25.8% |
| TM2D2     | 83877  | 40.4% | 16.5% | 20.6% | 25.8% |
| WSB2      | 55884  | 27.0% | 21.0% | 29.6% | 25.8% |
| LRRC31    | 79782  | 33.4% | 23.3% | 20.8% | 25.8% |
| MGC45438  | 146556 | 17.0% | 24.6% | 35.9% | 25.8% |
| FKBP4     | 2288   | 28.6% | 17.6% | 31.4% | 25.8% |
| C20ORF102 | 128434 | 25.2% | 31.9% | 20.4% | 25.8% |
| RIT1      | 6016   | 40.2% | 13.6% | 23.7% | 25.8% |
| FLJ36878  | 284114 | 18.8% | 22.4% | 36.4% | 25.8% |
| DUX5      | 26581  | 26.3% | 21.9% | 29.3% | 25.8% |
| F13B      | 2165   | 35.4% | 15.1% | 27.0% | 25.8% |
| PRKCDBP   | 112464 | 26.7% | 24.2% | 26.7% | 25.8% |
| MUT       | 4594   | 28.0% | 24.1% | 25.4% | 25.8% |
| OR5P2     | 120065 | 40.0% | 15.8% | 21.7% | 25.8% |
| C13ORF18  | 80183  | 35.9% | 16.7% | 24.9% | 25.8% |
| MGC33637  | 161829 | 26.7% | 15.2% | 35.6% | 25.8% |
| MNAT1     | 4331   | 25.3% | 24.9% | 27.3% | 25.8% |
| YPEL1     | 29799  | 37.8% | 19.4% | 20.4% | 25.8% |
| FLJ22160  | 79637  | 15.4% | 37.5% | 24.6% | 25.8% |
| NRS5A1    | 2516   | 30.4% | 28.1% | 19.0% | 25.8% |
| KEL       | 3792   | 25.0% | 26.9% | 25.6% | 25.8% |
| AMY1A     | 276    | 18.8% | 46.7% | 12.1% | 25.8% |
| CNOT10    | 25904  | 23.4% | 27.5% | 26.7% | 25.8% |
| FLJ31606  | 124045 | 25.5% | 17.7% | 34.3% | 25.8% |
| TAF5L     | 27097  | 29.5% | 29.7% | 18.4% | 25.8% |
| PCDHGB4   | 8641   | 32.2% | 24.5% | 20.9% | 25.9% |
| C21ORF106 | 23181  | 29.4% | 36.3% | 11.9% | 25.9% |
| CYP17A1   | 1586   | 27.8% | 17.9% | 31.8% | 25.9% |
| NDST4     | 64579  | 42.4% | 14.3% | 20.8% | 25.9% |
| R29124_1  | 90273  | 29.2% | 15.9% | 32.5% | 25.9% |
| OR5212    | 143502 | 27.7% | 23.2% | 26.6% | 25.9% |
| BRP44L    | 51660  | 19.2% | 33.3% | 25.0% | 25.9% |
| LOC653483 | 653483 | 25.5% | 26.6% | 25.4% | 25.9% |
| LOC84661  | 84661  | 36.9% | 27.4% | 13.3% | 25.9% |
| LUZP1     | 7798   | 27.9% | 31.1% | 18.6% | 25.9% |
| USP7      | 7874   | 26.3% | 34.4% | 16.9% | 25.9% |
| C14ORF143 | 90141  | 18.6% | 32.8% | 26.2% | 25.9% |
| TRIM26    | 7726   | 30.9% | 15.3% | 31.4% | 25.9% |
| ZNF547    | 284306 | 29.1% | 20.8% | 27.7% | 25.9% |
| CNIH      | 10175  | 37.5% | 15.6% | 24.5% | 25.9% |
| CHUK      | 1147   | 29.9% | 27.9% | 19.9% | 25.9% |
| OLIG1     | 116448 | 32.2% | 21.3% | 24.1% | 25.9% |
| FLJ23548  | 79642  | 30.0% | 25.0% | 22.6% | 25.9% |
| SLC26A7   | 115111 | 36.4% | 14.0% | 27.3% | 25.9% |
| LDHC      | 3948   | 33.3% | 13.6% | 30.6% | 25.9% |
| TRIM      | 50852  | 20.7% | 27.3% | 29.5% | 25.9% |
| FLJ43752  | 401253 | 39.3% | 19.0% | 19.4% | 25.9% |
| ALDH1A2   | 8854   | 36.3% | 24.9% | 16.4% | 25.9% |
| LAP3      | 51056  | 35.9% | 18.2% | 23.5% | 25.9% |
| TUBB6     | 84617  | 42.1% | 14.2% | 21.3% | 25.9% |
| POUZAF1   | 5450   | 31.8% | 23.1% | 22.8% | 25.9% |
| AZGP1     | 563    | 30.9% | 24.1% | 22.7% | 25.9% |
| TOX       | 9760   | 37.7% | 18.7% | 21.2% | 25.9% |
| ZNF532    | 55205  | 39.6% | 15.1% | 22.9% | 25.9% |
| FMO1      | 2326   | 30.8% | 21.9% | 24.9% | 25.9% |
| ATP1B2    | 482    | 31.3% | 22.6% | 23.7% | 25.9% |
| PLA2G12B  | 84647  | 17.5% | 32.4% | 27.7% | 25.9% |
| SNCG      | 6623   | 26.2% | 35.8% | 15.6% | 25.9% |
| KATNAL1   | 84056  | 25.4% | 33.5% | 18.8% | 25.9% |
| DDR1      | 780    | 27.2% | 25.5% | 24.9% | 25.9% |
| PSORS1C2  | 170680 | 20.8% | 23.9% | 33.0% | 25.9% |
| SLAMF7    | 57823  | 35.4% | 14.9% | 27.4% | 25.9% |
| NEK11     | 79858  | 31.8% | 26.5% | 19.3% | 25.9% |
| SLC9A1    | 6548   | 28.1% | 20.6% | 29.0% | 25.9% |
| HOXA1     | 3198   | 30.1% | 24.5% | 23.1% | 25.9% |
| PPP1R8    | 5511   | 21.1% | 34.2% | 22.3% | 25.9% |
| YBX2      | 51087  | 28.7% | 26.4% | 22.5% | 25.9% |
| MCOLN3    | 55283  | 29.3% | 23.6% | 24.7% | 25.9% |
| FLJ35954  | 166968 | 18.3% | 27.9% | 31.4% | 25.9% |
| GPR50     | 9248   | 23.3% | 22.8% | 31.5% | 25.9% |
| TTC18     | 118491 | 26.2% | 24.4% | 27.0% | 25.9% |
| ASB11     | 140456 | 25.0% | 27.2% | 25.5% | 25.9% |
| CXORF1    | 9142   | 36.9% | 12.2% | 28.6% | 25.9% |
| GFPT1     | 2673   | 35.5% | 16.5% | 25.6% | 25.9% |
| SCN4B     | 6330   | 29.0% | 19.3% | 29.4% | 25.9% |
| MRPS26    | 64949  | 42.6% | 19.4% | 15.8% | 25.9% |
| PRO2730   | 80335  | 28.9% | 19.7% | 29.1% | 25.9% |
| OSMR      | 9180   | 35.1% | 18.5% | 24.1% | 25.9% |
| ABCF3     | 55324  | 28.6% | 28.1% | 21.0% | 25.9% |
| LOC401137 | 401137 | 30.5% | 20.5% | 26.7% | 25.9% |
| IFITM1    | 8519   | 24.3% | 30.3% | 23.1% | 25.9% |
| UNC5C     | 8633   | 33.0% | 22.0% | 22.6% | 25.9% |
| FGD5      | 152273 | 26.6% | 25.4% | 25.8% | 25.9% |
| GALNTL1   | 57452  | 36.6% | 20.9% | 20.1% | 25.9% |
| CLIC5     | 53405  | 36.8% | 12.6% | 28.2% | 25.9% |
| FKBPL     | 63943  | 26.0% | 31.0% | 20.7% | 25.9% |
| EWSR1     | 2130   | 23.7% | 22.3% | 31.7% | 25.9% |

|               |        |       |       |       |       |
|---------------|--------|-------|-------|-------|-------|
| ATF7IP        | 55729  | 37.0% | 12.0% | 28.7% | 25.9% |
| SUSD3         | 203328 | 33.8% | 21.5% | 22.4% | 25.9% |
| MGC14839      | 91894  | 22.9% | 26.0% | 28.8% | 25.9% |
| SELENBP1      | 8991   | 36.4% | 19.0% | 22.4% | 25.9% |
| CACNB1        | 782    | 34.1% | 19.3% | 24.3% | 25.9% |
| BTBD14B       | 112939 | 25.0% | 25.9% | 26.8% | 25.9% |
| FLJ14249      | 64342  | 25.3% | 21.8% | 30.6% | 25.9% |
| DDN           | 23109  | 39.6% | 21.5% | 16.7% | 25.9% |
| WBSCR18       | 84277  | 37.8% | 13.5% | 26.5% | 25.9% |
| AQP9          | 366    | 34.1% | 19.5% | 24.1% | 25.9% |
| OR6B3         | 150681 | 28.7% | 23.6% | 25.5% | 25.9% |
| LDHA          | 3939   | 31.9% | 21.1% | 24.7% | 25.9% |
| RAPGEF4       | 11069  | 39.8% | 21.3% | 16.6% | 25.9% |
| TMC1          | 117531 | 45.3% | 20.9% | 11.5% | 25.9% |
| SLC25A18      | 83733  | 33.0% | 28.4% | 16.4% | 25.9% |
| SEC24B        | 10427  | 30.7% | 22.0% | 25.1% | 25.9% |
| PGLYRP1       | 8993   | 25.5% | 22.0% | 30.2% | 25.9% |
| MTNRP1A       | 4543   | 28.5% | 27.8% | 21.4% | 25.9% |
| EIF3S9        | 8662   | 30.6% | 26.8% | 20.4% | 25.9% |
| FYN           | 2534   | 22.3% | 27.5% | 28.0% | 25.9% |
| ARSB          | 411    | 28.3% | 23.5% | 26.0% | 25.9% |
| ZNF179        | 7732   | 25.2% | 26.2% | 26.4% | 25.9% |
| SFXN3         | 81855  | 30.8% | 24.7% | 22.3% | 25.9% |
| KIAA1363      | 57552  | 33.2% | 21.2% | 23.3% | 25.9% |
| KHSRP         | 8570   | 25.0% | 36.4% | 16.4% | 25.9% |
| IFI30         | 10437  | 36.5% | 20.2% | 21.1% | 25.9% |
| SCARB1        | 949    | 21.2% | 26.1% | 30.5% | 25.9% |
| C2GNT3        | 51301  | 26.0% | 24.1% | 27.7% | 25.9% |
| PDHA2         | 5161   | 44.4% | 20.0% | 13.3% | 25.9% |
| PGR           | 5241   | 22.6% | 25.0% | 30.2% | 25.9% |
| C6ORF89       | 221477 | 28.7% | 28.8% | 20.3% | 25.9% |
| NDUF88        | 4714   | 29.0% | 19.2% | 29.6% | 25.9% |
| RAB9P40       | 10244  | 40.3% | 9.8%  | 27.7% | 25.9% |
| KRT25B        | 353288 | 25.3% | 26.7% | 25.8% | 25.9% |
| DKFZP434P0316 | 84074  | 30.1% | 16.4% | 31.2% | 25.9% |
| RC3H2         | 54542  | 32.6% | 18.5% | 26.7% | 25.9% |
| LOH11CR2A     | 4013   | 34.9% | 16.1% | 26.8% | 25.9% |
| RAB22A        | 57403  | 37.1% | 28.0% | 12.7% | 25.9% |
| PCP2          | 126006 | 38.0% | 22.5% | 17.3% | 25.9% |
| FLJ45455      | 388336 | 37.1% | 17.8% | 22.9% | 25.9% |
| GSTM5         | 2949   | 26.3% | 25.3% | 26.2% | 25.9% |
| FLJ42461      | 342527 | 25.4% | 10.7% | 41.7% | 25.9% |
| CYBASC3       | 220002 | 20.4% | 27.9% | 29.5% | 25.9% |
| CEBPE         | 1053   | 33.3% | 22.2% | 22.3% | 25.9% |
| C6ORF168      | 84553  | 25.0% | 27.3% | 25.6% | 25.9% |
| ORS2N4        | 390072 | 36.4% | 25.7% | 15.6% | 25.9% |
| DKFZP566E144  | 25996  | 26.7% | 25.8% | 25.3% | 25.9% |
| UBL3          | 5412   | 34.4% | 11.1% | 32.4% | 25.9% |
| FLJ43654      | 375341 | 23.1% | 22.2% | 32.5% | 25.9% |
| ZNF287        | 57336  | 29.7% | 20.0% | 28.1% | 25.9% |
| COL27A1       | 85301  | 28.9% | 32.5% | 16.5% | 25.9% |
| NRGN          | 4900   | 31.6% | 21.1% | 25.2% | 25.9% |
| SNTG2         | 54221  | 27.5% | 28.3% | 22.1% | 25.9% |
| HCMOGT-1      | 92521  | 20.7% | 19.6% | 37.6% | 26.0% |
| SLC32A1       | 140679 | 27.8% | 22.8% | 27.2% | 26.0% |
| HPCAL1        | 3241   | 41.7% | 22.2% | 14.0% | 26.0% |
| ARFRP2        | 54622  | 24.7% | 33.2% | 19.9% | 26.0% |
| MRPL10        | 124995 | 33.3% | 24.0% | 20.6% | 26.0% |
| SCN1A         | 6323   | 29.6% | 19.1% | 29.1% | 26.0% |
| MXRA8         | 54587  | 25.5% | 30.9% | 21.5% | 26.0% |
| WWP1          | 11059  | 25.9% | 21.5% | 30.4% | 26.0% |
| CHN1          | 1123   | 22.1% | 19.9% | 35.9% | 26.0% |
| NKIRAS2       | 28511  | 29.8% | 27.0% | 21.1% | 26.0% |
| FIBP          | 9158   | 31.8% | 21.3% | 24.9% | 26.0% |
| N4BP3         | 23138  | 27.1% | 22.0% | 28.8% | 26.0% |
| ARL1          | 400    | 30.3% | 17.1% | 30.5% | 26.0% |
| ATP2C1        | 27032  | 32.9% | 17.5% | 27.5% | 26.0% |
| PROSAPIP2     | 9755   | 21.1% | 21.4% | 35.5% | 26.0% |
| EVC           | 2121   | 26.0% | 23.4% | 28.5% | 26.0% |
| FLJ11712      | 79621  | 23.4% | 22.8% | 31.7% | 26.0% |
| TMEM26        | 219623 | 24.4% | 20.9% | 32.6% | 26.0% |
| 15E1.2        | 283459 | 34.8% | 20.0% | 23.1% | 26.0% |
| FLJ46321      | 389763 | 30.8% | 22.0% | 25.2% | 26.0% |
| ORS1A7        | 119687 | 27.6% | 24.5% | 25.8% | 26.0% |
| ARPP-21       | 10777  | 32.3% | 13.7% | 31.9% | 26.0% |
| IVD           | 3712   | 29.6% | 20.0% | 28.3% | 26.0% |
| MOSPD2        | 158747 | 25.7% | 24.8% | 27.4% | 26.0% |
| APLN          | 8862   | 25.2% | 27.7% | 25.0% | 26.0% |
| NPEPL1        | 79716  | 32.6% | 24.2% | 21.1% | 26.0% |
| ARHGAP15      | 55843  | 38.6% | 14.8% | 24.4% | 26.0% |
| CEACAM6       | 4680   | 29.4% | 25.8% | 22.7% | 26.0% |
| FLJ23441      | 79731  | 26.3% | 27.4% | 24.2% | 26.0% |
| MGC34680      | 124935 | 24.3% | 23.0% | 30.6% | 26.0% |
| SEC23IP       | 11196  | 26.7% | 17.7% | 33.6% | 26.0% |
| MGC10500      | 83719  | 27.3% | 20.4% | 30.2% | 26.0% |
| SSX4          | 6759   | 27.9% | 17.4% | 32.7% | 26.0% |
| KRTAP8-1      | 337879 | 34.9% | 25.9% | 17.1% | 26.0% |
| LOC91689      | 91689  | 23.2% | 21.4% | 33.3% | 26.0% |
| GSDML         | 55876  | 28.6% | 22.2% | 27.1% | 26.0% |
| TBCC          | 6903   | 28.9% | 16.8% | 32.2% | 26.0% |
| DEFB123       | 245936 | 35.2% | 26.4% | 16.4% | 26.0% |
| DNCL12        | 1783   | 33.9% | 17.4% | 26.6% | 26.0% |
| MGC70924      | 284338 | 32.8% | 27.8% | 17.4% | 26.0% |
| C9ORF79       | 286234 | 16.0% | 40.0% | 22.0% | 26.0% |
| AFAP          | 60312  | 40.1% | 17.9% | 19.9% | 26.0% |
| NGFR          | 4804   | 37.7% | 11.7% | 28.6% | 26.0% |
| GPHA2         | 170589 | 16.4% | 27.5% | 34.0% | 26.0% |
| KCNJ13        | 3769   | 34.2% | 16.2% | 27.5% | 26.0% |

|               |        |       |       |       |       |
|---------------|--------|-------|-------|-------|-------|
| KIAA1069      | 23007  | 43.4% | 12.4% | 22.1% | 26.0% |
| VPS13A        | 23230  | 37.0% | 27.0% | 14.0% | 26.0% |
| RAB6IP1       | 23258  | 20.2% | 32.2% | 25.6% | 26.0% |
| DAXX          | 1616   | 38.3% | 18.6% | 21.1% | 26.0% |
| FLJ40365      | 126402 | 23.9% | 22.8% | 31.3% | 26.0% |
| ATP6VOB       | 533    | 44.2% | 23.1% | 10.7% | 26.0% |
| NOLC1         | 9221   | 30.0% | 28.0% | 20.0% | 26.0% |
| UNQ2541       | 389812 | 35.9% | 15.0% | 27.1% | 26.0% |
| BENE          | 7851   | 22.2% | 23.6% | 32.2% | 26.0% |
| OR12D2        | 26529  | 41.7% | 19.7% | 16.6% | 26.0% |
| ZDHH15        | 158866 | 42.2% | 18.5% | 17.2% | 26.0% |
| BLZF1         | 8548   | 36.6% | 18.9% | 22.5% | 26.0% |
| OR13C9        | 286362 | 38.7% | 17.6% | 21.8% | 26.0% |
| DLST          | 1743   | 27.4% | 23.4% | 27.2% | 26.0% |
| Sep-10        | 151011 | 31.5% | 22.3% | 24.1% | 26.0% |
| TAF1L         | 138474 | 27.7% | 24.7% | 25.6% | 26.0% |
| ZNF146        | 7705   | 29.7% | 30.6% | 17.7% | 26.0% |
| SYT5          | 6861   | 29.9% | 26.5% | 21.6% | 26.0% |
| CST11         | 140880 | 29.0% | 28.0% | 21.0% | 26.0% |
| GUCY2F        | 2986   | 29.6% | 28.7% | 19.7% | 26.0% |
| PHF13         | 148479 | 23.8% | 25.8% | 28.5% | 26.0% |
| HSPBAP1       | 79663  | 20.4% | 29.4% | 28.2% | 26.0% |
| SEC14L3       | 266629 | 42.9% | 13.3% | 21.8% | 26.0% |
| RUFY1         | 80230  | 26.3% | 24.2% | 27.5% | 26.0% |
| XYLB          | 9942   | 26.2% | 28.7% | 23.1% | 26.0% |
| KIAA1804      | 84451  | 21.8% | 27.2% | 29.1% | 26.0% |
| GUP1          | 145781 | 22.9% | 25.5% | 29.6% | 26.0% |
| SUMO3         | 6612   | 38.3% | 25.1% | 14.6% | 26.0% |
| VIP           | 7432   | 27.2% | 27.2% | 23.6% | 26.0% |
| FLJ11752      | 92344  | 27.4% | 32.8% | 17.8% | 26.0% |
| SFR56         | 6431   | 36.2% | 21.1% | 20.8% | 26.0% |
| REG1B         | 5968   | 29.9% | 25.0% | 23.2% | 26.0% |
| FZD10         | 11211  | 28.8% | 26.4% | 22.9% | 26.0% |
| CD3G          | 917    | 33.2% | 18.4% | 26.4% | 26.0% |
| PDZRN4        | 29951  | 24.1% | 30.3% | 23.6% | 26.0% |
| LRCH4         | 4034   | 35.2% | 18.8% | 24.0% | 26.0% |
| LOC348801     | 348801 | 31.5% | 16.6% | 30.0% | 26.0% |
| KIAA1889      | 114786 | 29.7% | 12.6% | 35.7% | 26.0% |
| SLC25A36      | 55186  | 35.8% | 19.7% | 22.5% | 26.0% |
| C22ORF1       | 758    | 22.4% | 20.2% | 35.4% | 26.0% |
| MYO5B         | 4645   | 32.4% | 23.3% | 22.4% | 26.0% |
| UNQ429        | 130120 | 21.1% | 26.2% | 30.7% | 26.0% |
| SPG3A         | 51062  | 30.6% | 18.3% | 29.2% | 26.0% |
| UCP2          | 7351   | 26.2% | 27.3% | 24.5% | 26.0% |
| XYLT2         | 64132  | 37.3% | 20.6% | 20.1% | 26.0% |
| ELMO2         | 63916  | 42.7% | 18.8% | 16.5% | 26.0% |
| PLA2G2A       | 5320   | 29.3% | 29.7% | 19.0% | 26.0% |
| CART1         | 8092   | 26.8% | 22.2% | 29.1% | 26.0% |
| PRES          | 375611 | 34.0% | 16.8% | 27.2% | 26.0% |
| CTBP1         | 1487   | 29.8% | 18.8% | 29.5% | 26.0% |
| NKPD1         | 284353 | 27.4% | 17.2% | 33.4% | 26.0% |
| NOX3          | 50508  | 35.7% | 18.3% | 24.1% | 26.0% |
| ITPKB         | 3707   | 27.3% | 32.8% | 18.0% | 26.0% |
| ZNF319        | 57567  | 26.5% | 24.0% | 27.6% | 26.0% |
| CALCR         | 799    | 24.3% | 22.9% | 30.9% | 26.0% |
| EDN1          | 1906   | 29.6% | 32.2% | 16.3% | 26.0% |
| FAM36A        | 116228 | 27.3% | 25.4% | 25.4% | 26.0% |
| DKFZP434O0213 | 91355  | 26.3% | 14.8% | 37.0% | 26.0% |
| DAP           | 1611   | 26.2% | 28.3% | 23.6% | 26.0% |
| TTC1          | 7265   | 25.9% | 25.7% | 26.5% | 26.0% |
| EPC2          | 26122  | 33.1% | 29.2% | 15.8% | 26.0% |
| CLK4          | 57396  | 17.9% | 29.8% | 30.4% | 26.0% |
| IGSF11        | 152404 | 18.8% | 30.8% | 28.6% | 26.0% |
| MGC15606      | 91775  | 19.1% | 24.8% | 34.2% | 26.0% |
| C10ORF99      | 387695 | 13.9% | 42.1% | 22.1% | 26.0% |
| C10ORF11      | 83938  | 28.1% | 24.8% | 25.3% | 26.0% |
| SHKBP1        | 92799  | 28.7% | 25.6% | 23.8% | 26.0% |
| VASP          | 7408   | 30.2% | 23.5% | 24.4% | 26.0% |
| PLXNB3        | 5365   | 31.4% | 22.2% | 24.4% | 26.0% |
| BBP           | 83941  | 22.6% | 20.0% | 35.5% | 26.0% |
| DPAGT1        | 1798   | 32.2% | 15.9% | 30.1% | 26.0% |
| PRY2          | 442862 | 31.5% | 18.9% | 27.8% | 26.0% |
| TKT           | 7086   | 25.0% | 22.7% | 30.5% | 26.0% |
| LOC441150     | 441150 | 28.8% | 26.8% | 22.5% | 26.0% |
| TMEM17        | 200728 | 34.4% | 27.6% | 16.1% | 26.0% |
| EPS15L1       | 58513  | 36.3% | 22.3% | 19.6% | 26.0% |
| METTL3        | 56339  | 35.0% | 19.0% | 24.1% | 26.0% |
| DARS          | 1615   | 27.3% | 21.7% | 29.2% | 26.0% |
| DKFZP547E052  | 84236  | 26.3% | 25.0% | 26.8% | 26.0% |
| SEC11L1       | 23478  | 31.6% | 35.7% | 10.9% | 26.0% |
| LOC644096     | 644096 | 23.1% | 27.4% | 27.7% | 26.0% |
| ZNF274        | 10782  | 31.2% | 23.0% | 24.0% | 26.0% |
| ARSE          | 415    | 35.4% | 21.9% | 20.9% | 26.0% |
| R-SPONDIN     | 284654 | 13.5% | 30.9% | 33.7% | 26.1% |
| PME-1         | 51400  | 31.6% | 20.2% | 26.3% | 26.1% |
| LRFN3         | 79414  | 36.4% | 16.0% | 25.8% | 26.1% |
| KCNJ11        | 3767   | 29.5% | 24.9% | 23.8% | 26.1% |
| FLJ12448      | 64897  | 28.6% | 28.3% | 21.3% | 26.1% |
| GLTSCR1       | 29998  | 22.0% | 32.1% | 24.0% | 26.1% |
| CALD1         | 800    | 29.1% | 23.1% | 26.0% | 26.1% |
| PDIP          | 64714  | 31.9% | 19.8% | 26.5% | 26.1% |
| CCL4L1        | 9560   | 19.0% | 32.4% | 26.7% | 26.1% |
| INM01         | 157695 | 31.2% | 23.6% | 23.4% | 26.1% |
| ECE2          | 9718   | 30.2% | 22.0% | 26.0% | 26.1% |
| APOBEC3A      | 200315 | 35.8% | 20.6% | 21.7% | 26.1% |
| LOC441294     | 441294 | 32.2% | 25.3% | 20.7% | 26.1% |
| MUC2          | 4583   | 31.8% | 15.9% | 30.4% | 26.1% |
| UNG2          | 10309  | 35.3% | 20.5% | 22.4% | 26.1% |

|               |           |       |       |       |       |
|---------------|-----------|-------|-------|-------|-------|
| NALP2         | 55655     | 28.7% | 16.4% | 33.1% | 26.1% |
| RPL39L        | 116832    | 22.0% | 28.3% | 27.9% | 26.1% |
| OR5A51        | 219447    | 31.5% | 27.5% | 19.2% | 26.1% |
| RP4-622L5     | 56063     | 28.3% | 22.1% | 27.8% | 26.1% |
| FATE1         | 89885     | 32.7% | 21.7% | 23.8% | 26.1% |
| MGC3248       | 84516     | 26.9% | 20.7% | 30.6% | 26.1% |
| SPANX-N1      | 494118    | 20.6% | 16.5% | 41.2% | 26.1% |
| FUS           | 2521      | 43.0% | 20.9% | 14.3% | 26.1% |
| RHO           | 6010      | 29.9% | 22.1% | 26.2% | 26.1% |
| TJP3          | 27134     | 24.3% | 18.1% | 35.8% | 26.1% |
| TRIM56        | 81844     | 28.0% | 23.7% | 26.5% | 26.1% |
| LOC643847     | 643847    | 23.9% | 29.3% | 25.0% | 26.1% |
| OR2T12        | 127064    | 37.8% | 23.2% | 17.2% | 26.1% |
| PLGL          | 5342      | 35.3% | 29.7% | 13.3% | 26.1% |
| ZNF20         | 7568      | 26.2% | 26.0% | 26.0% | 26.1% |
| RNF6          | 6049      | 25.7% | 30.9% | 21.6% | 26.1% |
| EIF4G2        | 1982      | 32.3% | 24.2% | 21.8% | 26.1% |
| PMFBP1        | 83449     | 32.6% | 23.3% | 22.3% | 26.1% |
| SPATA9        | 83890     | 33.9% | 25.3% | 19.1% | 26.1% |
| TSP-NY        | 84660     | 24.8% | 19.4% | 34.1% | 26.1% |
| BPI           | 671       | 28.0% | 28.6% | 21.7% | 26.1% |
| CENTD1        | 116984    | 24.2% | 19.8% | 34.2% | 26.1% |
| TRIM35        | 23087     | 21.9% | 31.4% | 24.9% | 26.1% |
| TRAF3         | 7187      | 28.2% | 27.7% | 22.3% | 26.1% |
| TRAPP5        | 126003    | 23.7% | 29.6% | 25.0% | 26.1% |
| KIAA1078      | 23271     | 30.4% | 21.7% | 26.2% | 26.1% |
| LOC100132832  | 100132832 | 29.4% | 24.8% | 24.0% | 26.1% |
| FEZ1          | 9638      | 19.4% | 24.7% | 34.1% | 26.1% |
| MGC35048      | 124152    | 23.0% | 24.1% | 31.1% | 26.1% |
| UNQ9356       | 389400    | 34.2% | 19.0% | 25.1% | 26.1% |
| TRIM59        | 286827    | 37.9% | 18.8% | 21.6% | 26.1% |
| CENTG2        | 116987    | 25.8% | 28.4% | 24.1% | 26.1% |
| ARGFX         | 503582    | 34.4% | 18.0% | 25.8% | 26.1% |
| PIK3CD        | 5293      | 27.6% | 27.2% | 23.5% | 26.1% |
| CASP6         | 839       | 25.6% | 27.4% | 25.2% | 26.1% |
| THEM2         | 55856     | 28.2% | 24.0% | 26.1% | 26.1% |
| ADIPOR1       | 51094     | 33.9% | 24.9% | 19.5% | 26.1% |
| STUB1         | 10273     | 23.8% | 21.9% | 32.7% | 26.1% |
| ZBTB33        | 10009     | 31.9% | 19.6% | 26.7% | 26.1% |
| PNLIPRP1      | 5407      | 43.8% | 15.7% | 18.8% | 26.1% |
| HOXC9         | 3225      | 32.8% | 20.1% | 25.4% | 26.1% |
| FLJ32830      | 256957    | 19.4% | 17.7% | 41.1% | 26.1% |
| NYX           | 60506     | 50.0% | 15.8% | 12.5% | 26.1% |
| SNX19         | 399979    | 28.8% | 13.1% | 36.4% | 26.1% |
| MGC33839      | 125875    | 25.2% | 23.9% | 29.2% | 26.1% |
| PGLYRP2       | 114770    | 39.4% | 13.1% | 25.7% | 26.1% |
| FLJ25286      | 153443    | 25.5% | 16.8% | 36.0% | 26.1% |
| INPP1         | 3628      | 34.7% | 28.9% | 14.6% | 26.1% |
| PTRF          | 284119    | 34.2% | 23.2% | 20.9% | 26.1% |
| DKFZP434K1172 | 83446     | 30.8% | 19.5% | 27.9% | 26.1% |
| CTBS          | 1486      | 33.3% | 22.9% | 22.1% | 26.1% |
| WNK4          | 65266     | 21.8% | 33.3% | 23.2% | 26.1% |
| YAP1          | 10413     | 30.2% | 21.2% | 26.9% | 26.1% |
| FLJ21839      | 60509     | 31.9% | 21.6% | 24.8% | 26.1% |
| LY6E          | 4061      | 17.7% | 20.9% | 39.7% | 26.1% |
| ELK4          | 2005      | 34.2% | 21.2% | 23.0% | 26.1% |
| CRB1          | 23418     | 26.1% | 33.7% | 18.6% | 26.1% |
| ANK1          | 286       | 29.1% | 23.4% | 25.8% | 26.1% |
| ITGB7         | 3695      | 29.2% | 26.2% | 23.0% | 26.1% |
| CDS1          | 1040      | 16.8% | 21.4% | 40.2% | 26.1% |
| ASP           | 83853     | 33.9% | 21.4% | 23.0% | 26.1% |
| NXPH1         | 30010     | 32.4% | 7.9%  | 38.0% | 26.1% |
| CYB561D1      | 284613    | 32.7% | 20.9% | 24.7% | 26.1% |
| PON2          | 5445      | 25.6% | 32.8% | 20.0% | 26.1% |
| HSD3B1        | 3283      | 28.1% | 26.5% | 23.7% | 26.1% |
| TRPC1         | 7220      | 36.2% | 20.5% | 21.6% | 26.1% |
| SKD3          | 81570     | 27.7% | 18.8% | 31.8% | 26.1% |
| TMED6         | 146456    | 40.5% | 14.7% | 23.1% | 26.1% |
| MGC15716      | 84330     | 17.5% | 16.3% | 44.6% | 26.1% |
| LOC113179     | 113179    | 33.0% | 16.2% | 29.1% | 26.1% |
| ZNRF4         | 148066    | 24.3% | 34.4% | 19.6% | 26.1% |
| MGC8974       | 115353    | 24.3% | 21.0% | 33.1% | 26.1% |
| APOC2         | 344       | 25.9% | 23.9% | 28.6% | 26.1% |
| INSL3         | 3640      | 21.9% | 35.8% | 20.7% | 26.1% |
| AVPR1A        | 552       | 25.1% | 20.7% | 32.5% | 26.1% |
| RAD54L        | 8438      | 25.2% | 27.7% | 25.5% | 26.1% |
| ANKH          | 56172     | 14.4% | 30.2% | 33.8% | 26.1% |
| GNAI2         | 2771      | 28.0% | 24.2% | 26.2% | 26.1% |
| GPAA1         | 8733      | 31.3% | 17.6% | 29.4% | 26.1% |
| LOC144100     | 144100    | 19.8% | 27.7% | 30.9% | 26.1% |
| SDCCAG10      | 10283     | 32.5% | 18.7% | 27.2% | 26.1% |
| MOBK11A       | 92597     | 31.5% | 14.6% | 32.3% | 26.1% |
| ABCG5         | 64240     | 35.6% | 18.9% | 23.8% | 26.1% |
| BBS1          | 582       | 30.0% | 24.0% | 24.4% | 26.1% |
| TBC1D3G       | 654341    | 38.0% | 22.3% | 18.1% | 26.1% |
| OR52R1        | 119695    | 26.8% | 24.3% | 27.3% | 26.1% |
| SENP8         | 123228    | 17.4% | 31.4% | 29.6% | 26.1% |
| CACNA1B       | 774       | 26.8% | 21.9% | 29.7% | 26.1% |
| CLN5          | 1203      | 35.2% | 27.3% | 15.9% | 26.1% |
| UNQ698        | 374897    | 29.4% | 18.4% | 30.7% | 26.1% |
| LOC338949     | 338949    | 27.2% | 21.8% | 29.3% | 26.1% |
| DKFZP434L1717 | 84076     | 33.6% | 16.7% | 28.2% | 26.1% |
| FLJ37543      | 285668    | 31.8% | 25.5% | 21.1% | 26.1% |
| PIK3CG        | 5294      | 26.7% | 29.7% | 22.0% | 26.1% |
| PC4           | 10923     | 21.3% | 23.6% | 33.5% | 26.1% |
| SMAD7         | 4092      | 31.5% | 17.0% | 29.9% | 26.1% |
| PXT1          | 222659    | 26.8% | 17.9% | 33.7% | 26.1% |
| EPHX1         | 2052      | 29.9% | 22.8% | 25.7% | 26.1% |

|            |        |       |       |       |       |
|------------|--------|-------|-------|-------|-------|
| FLJ35773   | 162387 | 23.5% | 27.7% | 27.2% | 26.1% |
| UPF3A      | 65110  | 26.3% | 26.0% | 26.1% | 26.1% |
| KIAA0676   | 23061  | 18.5% | 17.4% | 42.5% | 26.1% |
| KRTAP15-1  | 254950 | 33.3% | 21.7% | 23.4% | 26.1% |
| LOC153222  | 153222 | 26.7% | 29.8% | 21.9% | 26.1% |
| UNQ6411    | 401027 | 26.8% | 29.9% | 21.7% | 26.1% |
| PPIL5      | 122769 | 23.4% | 33.8% | 21.2% | 26.1% |
| ADAMTS16   | 170690 | 26.5% | 29.8% | 22.1% | 26.1% |
| KLK4       | 9622   | 34.9% | 23.1% | 20.5% | 26.1% |
| BACE2      | 25825  | 31.0% | 27.9% | 19.6% | 26.1% |
| GNB1       | 2782   | 32.5% | 20.3% | 25.6% | 26.1% |
| CBLB       | 868    | 29.3% | 20.9% | 28.2% | 26.1% |
| MMP9       | 4318   | 33.9% | 22.0% | 22.5% | 26.1% |
| SPR        | 6697   | 25.9% | 19.5% | 33.1% | 26.1% |
| LAMC3      | 10319  | 32.4% | 23.1% | 23.0% | 26.1% |
| KIAA0625   | 23064  | 18.3% | 32.6% | 27.5% | 26.1% |
| C14ORF2    | 9556   | 36.2% | 14.5% | 27.7% | 26.1% |
| MGC72001   | 344752 | 37.8% | 19.5% | 21.1% | 26.1% |
| FBXO47     | 494188 | 28.4% | 25.7% | 24.3% | 26.1% |
| ABCA13     | 154664 | 19.9% | 31.0% | 27.6% | 26.1% |
| FAM22G     | 441457 | 18.7% | 37.7% | 22.0% | 26.1% |
| PMP22      | 5376   | 39.8% | 16.8% | 21.9% | 26.1% |
| FHOD3      | 80206  | 26.7% | 25.2% | 26.5% | 26.2% |
| ATP13A     | 57130  | 35.3% | 16.5% | 26.7% | 26.2% |
| RASGRF2    | 5924   | 22.5% | 24.9% | 31.1% | 26.2% |
| OR8B8      | 26493  | 29.2% | 23.6% | 25.7% | 26.2% |
| PRIMA1     | 145270 | 36.0% | 23.6% | 18.8% | 26.2% |
| FLJ22490   | 79848  | 26.6% | 17.2% | 34.7% | 26.2% |
| C14ORF103  | 55102  | 31.4% | 21.9% | 25.2% | 26.2% |
| PCDH9      | 5101   | 30.7% | 19.2% | 28.5% | 26.2% |
| LRP12      | 29967  | 19.3% | 31.6% | 27.6% | 26.2% |
| SPANXF1    | 171490 | 37.2% | 19.2% | 22.0% | 26.2% |
| VMD2L3     | 144453 | 28.9% | 23.0% | 26.6% | 26.2% |
| SRR        | 63826  | 30.3% | 26.8% | 21.3% | 26.2% |
| C9ORF116   | 138162 | 33.9% | 28.4% | 16.1% | 26.2% |
| NALP5      | 126206 | 33.0% | 27.1% | 18.4% | 26.2% |
| OCRL       | 4952   | 27.0% | 22.6% | 28.9% | 26.2% |
| CTGF       | 1490   | 32.6% | 25.9% | 20.0% | 26.2% |
| BLOC1S1    | 2647   | 33.8% | 21.9% | 22.8% | 26.2% |
| UBE2V1     | 7335   | 36.8% | 16.8% | 24.9% | 26.2% |
| OR2AG1     | 144125 | 13.3% | 36.6% | 28.6% | 26.2% |
| LOC285311  | 285311 | 20.0% | 19.5% | 39.0% | 26.2% |
| ADCYAP1R1  | 117    | 27.4% | 23.1% | 28.0% | 26.2% |
| KAI1       | 3732   | 18.8% | 21.9% | 37.7% | 26.2% |
| SLC7A6     | 9057   | 30.3% | 22.6% | 25.5% | 26.2% |
| PARG       | 8505   | 22.7% | 28.4% | 27.5% | 26.2% |
| ABHD6      | 57406  | 24.2% | 28.3% | 26.0% | 26.2% |
| VAV1       | 7409   | 28.4% | 20.9% | 29.2% | 26.2% |
| TRIM65     | 201292 | 35.2% | 12.9% | 30.4% | 26.2% |
| SNX2       | 6643   | 19.3% | 30.4% | 28.8% | 26.2% |
| WBP5       | 51186  | 28.0% | 27.6% | 22.9% | 26.2% |
| SUCNR1     | 56670  | 18.2% | 29.3% | 31.0% | 26.2% |
| DISP2      | 85455  | 35.3% | 26.8% | 16.3% | 26.2% |
| HSU24186   | 29935  | 23.5% | 17.8% | 37.2% | 26.2% |
| IFNA6      | 3443   | 37.1% | 20.7% | 20.8% | 26.2% |
| SNHG3-RCC1 | 751867 | 22.2% | 26.5% | 29.8% | 26.2% |
| JPH1       | 56704  | 33.3% | 16.8% | 28.4% | 26.2% |
| FLJ40597   | 165631 | 26.5% | 27.0% | 25.1% | 26.2% |
| FLJ38426   | 283742 | 23.8% | 19.0% | 35.8% | 26.2% |
| SC5DL      | 6309   | 30.3% | 19.2% | 29.0% | 26.2% |
| STRN3      | 29966  | 27.2% | 30.6% | 20.7% | 26.2% |
| KIAA0247   | 9766   | 29.0% | 18.7% | 30.8% | 26.2% |
| C15ORF15   | 51187  | 32.5% | 18.2% | 27.8% | 26.2% |
| ZCCHC7     | 84186  | 31.0% | 24.7% | 22.8% | 26.2% |
| KIAA1847   | 84619  | 21.4% | 29.7% | 27.5% | 26.2% |
| KIAA2002   | 79834  | 29.1% | 18.4% | 31.0% | 26.2% |
| MGC10946   | 80763  | 27.3% | 19.9% | 31.3% | 26.2% |
| MGC21394   | 404203 | 23.7% | 16.3% | 38.6% | 26.2% |
| EEF1A2     | 1917   | 41.4% | 21.0% | 16.1% | 26.2% |
| LOC653111  | 653111 | 34.3% | 16.9% | 27.3% | 26.2% |
| CHCHD6     | 84303  | 33.9% | 24.2% | 20.5% | 26.2% |
| IREB2      | 3658   | 32.9% | 23.3% | 22.3% | 26.2% |
| CERK       | 64781  | 27.3% | 28.7% | 22.5% | 26.2% |
| RBM5       | 10181  | 30.5% | 28.4% | 19.6% | 26.2% |
| MRPS16     | 51021  | 23.7% | 26.8% | 28.0% | 26.2% |
| APG-1      | 22824  | 40.0% | 14.8% | 23.7% | 26.2% |
| RPS6K11    | 83694  | 16.1% | 25.6% | 36.8% | 26.2% |
| LPIN1      | 23175  | 33.8% | 26.6% | 18.1% | 26.2% |
| STXBP1     | 6812   | 26.9% | 27.9% | 23.7% | 26.2% |
| TRO        | 7216   | 26.3% | 23.6% | 28.7% | 26.2% |
| C9ORF39    | 54875  | 36.8% | 27.5% | 14.3% | 26.2% |
| RNP24      | 10959  | 26.7% | 20.8% | 31.1% | 26.2% |
| COX10      | 1352   | 27.5% | 23.6% | 27.5% | 26.2% |
| TPH1       | 7166   | 39.0% | 22.0% | 17.6% | 26.2% |
| LOC220032  | 220032 | 28.3% | 22.1% | 28.2% | 26.2% |
| TADA2L     | 6871   | 31.6% | 20.8% | 26.2% | 26.2% |
| ANKRD30A   | 91074  | 33.9% | 18.0% | 26.7% | 26.2% |
| LOC286075  | 286075 | 26.0% | 15.6% | 37.0% | 26.2% |
| LGP2       | 79132  | 25.1% | 21.9% | 31.6% | 26.2% |
| MAL        | 4118   | 32.1% | 23.9% | 22.6% | 26.2% |
| MCF2       | 4168   | 37.3% | 15.5% | 25.8% | 26.2% |
| USP33      | 23032  | 38.6% | 21.3% | 18.7% | 26.2% |
| MGC16186   | 84332  | 13.9% | 36.7% | 28.0% | 26.2% |
| DPRX       | 503834 | 47.2% | 15.9% | 15.6% | 26.2% |
| MAPRE3     | 22924  | 33.2% | 23.9% | 21.5% | 26.2% |
| TNFSF5IP1  | 56984  | 34.6% | 23.0% | 21.0% | 26.2% |
| SID5       | 84296  | 24.8% | 14.7% | 39.1% | 26.2% |
| LOC646754  | 646754 | 27.8% | 22.7% | 28.1% | 26.2% |

|            |           |       |       |       |       |
|------------|-----------|-------|-------|-------|-------|
| FLJ33590   | 285093    | 30.8% | 23.9% | 24.0% | 26.2% |
| TFB2M      | 64216     | 31.6% | 25.0% | 22.0% | 26.2% |
| HAPLN1     | 1404      | 29.4% | 27.6% | 21.7% | 26.2% |
| BOMB       | 80014     | 14.8% | 27.6% | 36.2% | 26.2% |
| GPR56      | 9289      | 33.9% | 21.0% | 23.7% | 26.2% |
| SPO11      | 23626     | 20.0% | 33.9% | 24.8% | 26.2% |
| ZNF271     | 10778     | 25.0% | 14.6% | 39.1% | 26.2% |
| NTE        | 10908     | 27.8% | 26.9% | 23.9% | 26.2% |
| CD63       | 967       | 21.7% | 27.6% | 29.4% | 26.2% |
| KIAA0523   | 23302     | 11.4% | 22.0% | 45.3% | 26.2% |
| PLXNC1     | 10154     | 19.0% | 28.3% | 31.3% | 26.2% |
| SSX5       | 6758      | 22.3% | 26.8% | 29.5% | 26.2% |
| FLJ38792   | 284186    | 37.8% | 15.4% | 25.5% | 26.2% |
| POGK       | 57645     | 35.0% | 15.2% | 28.5% | 26.2% |
| OR1G1      | 8390      | 30.6% | 24.6% | 23.4% | 26.2% |
| VAPA       | 9218      | 23.8% | 24.4% | 30.5% | 26.2% |
| SLC39A6    | 25800     | 41.6% | 18.5% | 18.6% | 26.2% |
| C22ORF13   | 83606     | 26.2% | 30.7% | 21.8% | 26.2% |
| ARL8       | 221079    | 22.1% | 16.5% | 40.2% | 26.2% |
| NARG2      | 79664     | 22.5% | 29.8% | 26.4% | 26.2% |
| LOC653689  | 653689    | 33.5% | 21.9% | 23.2% | 26.2% |
| SH3TC2     | 79628     | 32.6% | 20.4% | 25.6% | 26.2% |
| OR1C1      | 26188     | 23.1% | 24.4% | 31.1% | 26.2% |
| STK16      | 8576      | 25.2% | 24.9% | 28.6% | 26.2% |
| PTTG1      | 9232      | 25.8% | 22.5% | 30.4% | 26.2% |
| EPC1       | 80314     | 35.0% | 17.1% | 26.6% | 26.2% |
| PDLIM7     | 9260      | 39.1% | 22.2% | 17.4% | 26.2% |
| EIF356     | 3646      | 27.9% | 15.8% | 35.0% | 26.2% |
| RPIP8      | 10900     | 37.1% | 14.9% | 26.7% | 26.2% |
| TLK2       | 11011     | 27.3% | 21.6% | 29.8% | 26.2% |
| HOXD1      | 3231      | 32.3% | 17.2% | 29.2% | 26.2% |
| C9ORF52    | 158219    | 34.1% | 25.9% | 18.7% | 26.2% |
| SOX30      | 11063     | 32.9% | 23.2% | 22.6% | 26.2% |
| NLK        | 51701     | 20.1% | 33.7% | 24.9% | 26.2% |
| ZNF445     | 353274    | 44.6% | 16.5% | 17.6% | 26.2% |
| SP6        | 80320     | 31.1% | 16.9% | 30.8% | 26.2% |
| DLEU7      | 220107    | 30.1% | 23.8% | 24.8% | 26.2% |
| AOAH       | 313       | 34.6% | 22.2% | 21.9% | 26.2% |
| MMP16      | 4325      | 23.3% | 25.9% | 29.5% | 26.2% |
| RIPK3      | 11035     | 25.4% | 28.2% | 25.1% | 26.2% |
| ZNF33A     | 7581      | 30.5% | 18.9% | 29.3% | 26.2% |
| INSIG1     | 3638      | 36.2% | 18.2% | 24.3% | 26.2% |
| LOC283989  | 283989    | 20.5% | 26.2% | 32.0% | 26.2% |
| MGC5509    | 79074     | 22.2% | 18.1% | 38.5% | 26.2% |
| DTX1       | 1840      | 26.0% | 23.9% | 28.9% | 26.2% |
| SPUF       | 29937     | 21.6% | 31.9% | 25.2% | 26.2% |
| ZRANB3     | 84083     | 36.6% | 21.0% | 21.1% | 26.2% |
| IRF2       | 3660      | 26.3% | 25.4% | 27.1% | 26.2% |
| B4GALT7    | 11285     | 23.7% | 26.1% | 29.0% | 26.2% |
| OR4C45     | 403257    | 25.4% | 24.8% | 28.5% | 26.2% |
| SCNN1G     | 6340      | 36.0% | 14.6% | 28.2% | 26.2% |
| RAB23      | 51715     | 33.6% | 15.0% | 30.1% | 26.2% |
| HARS2      | 92675     | 18.8% | 31.8% | 28.2% | 26.3% |
| NYD-SP29   | 126820    | 29.3% | 21.3% | 28.2% | 26.3% |
| TJP4       | 93643     | 28.9% | 17.8% | 32.0% | 26.3% |
| RAB11-FIP3 | 9727      | 18.8% | 17.6% | 42.4% | 26.3% |
| BM88       | 51286     | 29.8% | 16.9% | 32.0% | 26.3% |
| GABBR1     | 2550      | 24.5% | 24.7% | 29.5% | 26.3% |
| CLASP1     | 23332     | 29.9% | 31.0% | 17.8% | 26.3% |
| SLC19A3    | 80704     | 39.0% | 16.3% | 23.5% | 26.3% |
| GPR21      | 2844      | 22.2% | 27.5% | 29.1% | 26.3% |
| FLJ40089   | 120935    | 31.6% | 18.9% | 28.3% | 26.3% |
| FLJ32796   | 149647    | 25.5% | 24.7% | 28.6% | 26.3% |
| LOC196541  | 196541    | 37.9% | 19.1% | 21.8% | 26.3% |
| KIAA1409   | 57578     | 28.6% | 27.4% | 22.8% | 26.3% |
| USP49      | 25862     | 33.8% | 18.8% | 26.1% | 26.3% |
| RASA2      | 5922      | 30.0% | 26.6% | 22.2% | 26.3% |
| CLCN1      | 1180      | 36.9% | 16.8% | 25.1% | 26.3% |
| C6ORF201   | 404220    | 26.3% | 17.8% | 34.7% | 26.3% |
| SARA2      | 51128     | 21.7% | 27.4% | 29.7% | 26.3% |
| CALM2      | 805       | 21.2% | 30.7% | 26.9% | 26.3% |
| CENPC1     | 1060      | 28.6% | 22.6% | 27.6% | 26.3% |
| L3MBTL3    | 84456     | 22.5% | 20.3% | 35.9% | 26.3% |
| CES2       | 8824      | 40.2% | 15.6% | 23.0% | 26.3% |
| ABC88      | 11194     | 34.5% | 23.8% | 20.5% | 26.3% |
| SCAMP4     | 113178    | 30.8% | 27.0% | 21.0% | 26.3% |
| FLJ33008   | 145748    | 24.6% | 27.3% | 26.9% | 26.3% |
| SP3        | 6670      | 33.2% | 19.7% | 25.8% | 26.3% |
| PYCR2      | 29920     | 39.7% | 16.5% | 22.6% | 26.3% |
| C9ORF4     | 23732     | 30.6% | 22.6% | 25.6% | 26.3% |
| RGL1       | 23179     | 30.0% | 20.4% | 28.5% | 26.3% |
| SIGLEC7    | 27036     | 36.0% | 29.5% | 13.3% | 26.3% |
| PP35       | 11062     | 22.2% | 22.3% | 34.4% | 26.3% |
| LOC254531  | 254531    | 29.9% | 20.2% | 28.7% | 26.3% |
| TTL        | 150465    | 26.3% | 17.5% | 35.0% | 26.3% |
| NR2E1      | 7101      | 30.6% | 19.0% | 29.3% | 26.3% |
| RGS5       | 8490      | 25.6% | 19.1% | 34.0% | 26.3% |
| SHMT2      | 6472      | 35.9% | 18.5% | 24.4% | 26.3% |
| MAP7       | 9053      | 31.2% | 26.6% | 21.1% | 26.3% |
| IBSP       | 3381      | 36.4% | 18.3% | 24.1% | 26.3% |
| JMJD7      | 100137047 | 30.7% | 18.0% | 30.2% | 26.3% |
| TRIM64     | 120146    | 34.0% | 20.9% | 24.0% | 26.3% |
| KATNA1     | 11104     | 30.7% | 16.8% | 31.4% | 26.3% |
| RAP140     | 23272     | 18.7% | 25.2% | 35.0% | 26.3% |
| ALOX5AP    | 241       | 40.0% | 10.7% | 28.2% | 26.3% |
| IL16       | 3603      | 29.8% | 16.2% | 32.9% | 26.3% |
| NDUF56     | 4726      | 37.2% | 17.1% | 24.5% | 26.3% |
| PTPRH      | 5794      | 18.5% | 27.9% | 32.5% | 26.3% |

|               |           |       |       |       |       |
|---------------|-----------|-------|-------|-------|-------|
| CDH20         | 28316     | 35.9% | 24.1% | 18.8% | 26.3% |
| PHTF1         | 10745     | 30.2% | 20.5% | 28.1% | 26.3% |
| SP110         | 3431      | 30.3% | 27.1% | 21.4% | 26.3% |
| SURF1         | 6834      | 36.0% | 18.6% | 24.3% | 26.3% |
| LOC389170     | 389170    | 18.6% | 29.8% | 30.4% | 26.3% |
| CHRNA3        | 1136      | 32.9% | 19.6% | 26.3% | 26.3% |
| HSPD1         | 3329      | 40.7% | 14.1% | 24.1% | 26.3% |
| UBE2Z         | 65264     | 28.4% | 23.2% | 27.2% | 26.3% |
| GPR22         | 2845      | 19.7% | 31.4% | 27.8% | 26.3% |
| KCTD13        | 253980    | 32.7% | 16.2% | 30.0% | 26.3% |
| VAX1          | 11023     | 31.3% | 26.5% | 21.0% | 26.3% |
| RCN1          | 5954      | 32.6% | 28.2% | 18.1% | 26.3% |
| DKFZP547D2210 | 196500    | 29.3% | 19.0% | 30.6% | 26.3% |
| CGI-143       | 51027     | 15.1% | 22.7% | 41.1% | 26.3% |
| CRR9          | 81037     | 21.6% | 20.1% | 37.2% | 26.3% |
| NDUFAF1       | 51103     | 33.3% | 25.8% | 19.7% | 26.3% |
| SPANX-N2      | 494119    | 29.3% | 18.8% | 30.8% | 26.3% |
| SGKL          | 23678     | 25.6% | 27.2% | 26.0% | 26.3% |
| DMTF1         | 9988      | 40.8% | 21.2% | 16.9% | 26.3% |
| MRPL43        | 84545     | 30.0% | 18.4% | 30.5% | 26.3% |
| LOC146562     | 146562    | 25.5% | 21.9% | 31.5% | 26.3% |
| IFT140        | 9742      | 40.6% | 14.6% | 23.6% | 26.3% |
| PHF10         | 55274     | 30.5% | 20.6% | 27.8% | 26.3% |
| FAM7A2        | 89839     | 29.4% | 27.0% | 22.5% | 26.3% |
| DNAJ13        | 23317     | 27.8% | 28.6% | 22.5% | 26.3% |
| ICF45         | 54974     | 23.0% | 18.6% | 37.4% | 26.3% |
| LOC650137     | 650137    | 30.4% | 21.1% | 27.4% | 26.3% |
| CENT1A        | 11033     | 38.8% | 21.6% | 18.6% | 26.3% |
| GATA6         | 2627      | 46.8% | 13.0% | 19.2% | 26.3% |
| C7ORF3        | 64434     | 29.2% | 23.3% | 26.4% | 26.3% |
| MGC26694      | 284439    | 27.4% | 15.5% | 36.0% | 26.3% |
| LOC63920      | 63920     | 18.4% | 29.8% | 30.8% | 26.3% |
| POU1F1        | 5449      | 31.7% | 27.6% | 19.6% | 26.3% |
| ABO           | 28        | 50.5% | 15.1% | 13.4% | 26.3% |
| GCNT1         | 2650      | 26.3% | 22.6% | 30.0% | 26.3% |
| OR1J1         | 347168    | 29.4% | 18.8% | 30.8% | 26.3% |
| FLJ21062      | 79846     | 32.4% | 25.1% | 21.5% | 26.3% |
| ANKMY1        | 51281     | 37.5% | 19.1% | 22.3% | 26.3% |
| OR5B2         | 390190    | 34.4% | 14.5% | 30.1% | 26.3% |
| SLC6A3        | 6531      | 39.7% | 18.3% | 21.0% | 26.3% |
| L3MBTL4       | 91133     | 32.5% | 29.3% | 17.2% | 26.3% |
| DKFZP586B1621 | 26007     | 23.2% | 17.7% | 38.1% | 26.3% |
| TM4SF5        | 9032      | 32.4% | 28.6% | 18.0% | 26.3% |
| SELS          | 55829     | 29.2% | 25.0% | 24.7% | 26.3% |
| FLJ38335      | 162282    | 19.6% | 24.2% | 35.1% | 26.3% |
| ZNF627        | 199692    | 27.8% | 24.1% | 27.1% | 26.3% |
| ARIH2         | 10425     | 21.1% | 28.7% | 29.1% | 26.3% |
| KLHDC2        | 23588     | 29.2% | 28.1% | 21.6% | 26.3% |
| C6ORF83       | 113402    | 20.2% | 29.5% | 29.3% | 26.3% |
| RPL26L1       | 51121     | 37.5% | 23.4% | 18.1% | 26.3% |
| ROGD1         | 79641     | 28.1% | 24.1% | 26.7% | 26.3% |
| ZNF471        | 57573     | 28.0% | 22.3% | 28.8% | 26.3% |
| RNASE12       | 493901    | 36.8% | 14.9% | 27.3% | 26.3% |
| SPAG6         | 9576      | 30.5% | 32.3% | 16.2% | 26.3% |
| OR2T2         | 401992    | 27.6% | 23.0% | 28.4% | 26.3% |
| NYD-SP17      | 84692     | 16.8% | 35.5% | 26.7% | 26.3% |
| CX62          | 84694     | 27.3% | 26.7% | 25.1% | 26.3% |
| FLJ32009      | 220001    | 24.7% | 11.5% | 42.8% | 26.3% |
| MOGAT1        | 116255    | 32.7% | 21.9% | 24.4% | 26.3% |
| RRAD          | 6236      | 35.8% | 18.6% | 24.6% | 26.3% |
| TMCC1         | 23023     | 28.6% | 25.5% | 25.0% | 26.3% |
| FAM38A        | 9780      | 35.2% | 21.3% | 22.6% | 26.3% |
| LMAN2         | 10960     | 38.8% | 19.3% | 21.0% | 26.3% |
| HEPH          | 9843      | 37.5% | 22.4% | 19.1% | 26.3% |
| RBM19         | 9904      | 39.5% | 15.7% | 23.8% | 26.3% |
| OR9A2         | 135924    | 31.7% | 28.0% | 19.3% | 26.3% |
| KIFAP3        | 22920     | 39.2% | 24.5% | 15.3% | 26.3% |
| TTC3          | 7267      | 32.5% | 19.7% | 26.8% | 26.3% |
| ANKRD27       | 84079     | 39.2% | 22.9% | 16.9% | 26.3% |
| UTP14C        | 9724      | 23.1% | 27.8% | 28.2% | 26.3% |
| EIF4G1        | 1981      | 41.5% | 11.6% | 25.9% | 26.3% |
| PC            | 5091      | 29.1% | 24.9% | 25.1% | 26.3% |
| SOLH          | 6650      | 31.4% | 30.0% | 17.7% | 26.4% |
| ADORA2A       | 135       | 29.1% | 27.3% | 22.7% | 26.4% |
| SLC9A3R2      | 9351      | 32.0% | 21.3% | 25.8% | 26.4% |
| TOMM6         | 100188893 | 28.2% | 34.9% | 15.9% | 26.4% |
| ZNF354A       | 6940      | 37.8% | 20.7% | 20.5% | 26.4% |
| KREMEN1       | 83999     | 26.0% | 27.9% | 25.2% | 26.4% |
| RAE1          | 8480      | 28.7% | 25.6% | 24.7% | 26.4% |
| ACADM         | 34        | 38.7% | 18.1% | 22.3% | 26.4% |
| FLJ20186      | 54849     | 28.1% | 20.4% | 30.6% | 26.4% |
| OR4M1         | 441670    | 35.9% | 15.9% | 27.3% | 26.4% |
| MGC33510      | 254778    | 24.3% | 23.2% | 31.6% | 26.4% |
| MTMR1         | 8776      | 36.0% | 23.4% | 19.7% | 26.4% |
| ANKRD23       | 200539    | 31.0% | 17.4% | 30.7% | 26.4% |
| C2ORF13       | 200558    | 37.3% | 26.6% | 15.2% | 26.4% |
| PAPD4         | 167153    | 21.2% | 32.7% | 25.2% | 26.4% |
| LOC119710     | 119710    | 21.4% | 32.1% | 25.6% | 26.4% |
| TNPO2         | 30000     | 34.4% | 22.2% | 22.5% | 26.4% |
| TPTE2         | 93492     | 25.8% | 35.0% | 18.2% | 26.4% |
| ZNF212        | 7988      | 34.0% | 18.8% | 26.3% | 26.4% |
| INHBA         | 3624      | 24.7% | 29.5% | 24.9% | 26.4% |
| TLR6          | 10333     | 28.2% | 31.2% | 19.7% | 26.4% |
| OR10A4        | 283297    | 30.8% | 29.7% | 18.7% | 26.4% |
| CALCRL        | 10203     | 30.6% | 30.7% | 17.8% | 26.4% |
| MTX2          | 10651     | 32.1% | 18.8% | 28.2% | 26.4% |
| DKFZP434C184  | 399474    | 22.4% | 23.4% | 33.3% | 26.4% |
| RECK          | 8434      | 30.0% | 20.2% | 28.9% | 26.4% |

|              |        |       |       |       |       |
|--------------|--------|-------|-------|-------|-------|
| CELSR2       | 1952   | 35.1% | 22.2% | 21.9% | 26.4% |
| PCDH4        | 56144  | 44.7% | 19.4% | 15.0% | 26.4% |
| FLJ35696     | 388341 | 23.4% | 22.9% | 32.8% | 26.4% |
| CHD9         | 80205  | 29.8% | 24.2% | 25.1% | 26.4% |
| SLC1A6       | 6511   | 32.6% | 19.3% | 27.3% | 26.4% |
| DLG4         | 1742   | 25.7% | 26.1% | 27.4% | 26.4% |
| MGC35261     | 139212 | 22.2% | 18.1% | 38.8% | 26.4% |
| MAN1B1       | 11253  | 24.6% | 21.3% | 33.3% | 26.4% |
| PPM1L        | 151742 | 29.3% | 30.7% | 19.2% | 26.4% |
| IL29         | 282618 | 26.3% | 23.3% | 29.6% | 26.4% |
| AD-020       | 56900  | 22.7% | 14.9% | 41.5% | 26.4% |
| SLC2A6       | 11182  | 28.1% | 26.0% | 25.1% | 26.4% |
| SEMA4B       | 10509  | 21.7% | 22.3% | 35.2% | 26.4% |
| FBXL2        | 25827  | 29.2% | 20.0% | 30.0% | 26.4% |
| HUS1         | 3364   | 28.3% | 29.8% | 21.1% | 26.4% |
| TLL1         | 7092   | 33.1% | 29.3% | 16.8% | 26.4% |
| LOC139135    | 139135 | 34.8% | 16.7% | 27.7% | 26.4% |
| AICDA        | 57379  | 27.1% | 24.2% | 27.9% | 26.4% |
| DOC2B        | 8447   | 33.7% | 23.5% | 22.0% | 26.4% |
| PEPD         | 5184   | 27.0% | 30.6% | 21.7% | 26.4% |
| IPP          | 3652   | 32.8% | 21.7% | 24.7% | 26.4% |
| ME1          | 4199   | 23.0% | 28.3% | 27.9% | 26.4% |
| HBG1         | 3047   | 21.9% | 29.2% | 28.2% | 26.4% |
| POTE2        | 445582 | 26.0% | 24.1% | 29.2% | 26.4% |
| C17ORF37     | 84299  | 38.7% | 15.4% | 25.2% | 26.4% |
| KIF13A       | 63971  | 33.9% | 18.2% | 27.2% | 26.4% |
| VPS39        | 23339  | 27.9% | 25.0% | 26.4% | 26.4% |
| DXS9928E     | 9130   | 28.7% | 20.9% | 29.6% | 26.4% |
| SLC4A10      | 57282  | 29.4% | 26.7% | 23.2% | 26.4% |
| YTHDC2       | 64848  | 42.1% | 15.3% | 21.9% | 26.4% |
| FLJ37874     | 338699 | 19.1% | 34.8% | 25.4% | 26.4% |
| KIAA1718     | 80853  | 36.9% | 13.6% | 28.8% | 26.4% |
| LOC389708    | 286319 | 23.8% | 14.8% | 40.6% | 26.4% |
| RNF148       | 378925 | 29.0% | 30.5% | 19.7% | 26.4% |
| EGFL11       | 346007 | 23.6% | 26.2% | 29.4% | 26.4% |
| FLJ21019     | 79990  | 21.2% | 21.2% | 36.8% | 26.4% |
| C6ORF152     | 167691 | 29.9% | 31.8% | 17.7% | 26.4% |
| CPA4         | 51200  | 36.2% | 15.1% | 28.0% | 26.4% |
| MLLT2        | 4299   | 25.7% | 17.9% | 35.7% | 26.4% |
| TSPAN13      | 27075  | 31.0% | 25.3% | 23.0% | 26.4% |
| SLC39A2      | 29986  | 27.1% | 25.2% | 27.0% | 26.4% |
| ASGR2        | 433    | 27.8% | 31.7% | 19.7% | 26.4% |
| NETO2        | 81831  | 31.7% | 25.5% | 22.1% | 26.4% |
| C8ORF20      | 80346  | 19.4% | 19.1% | 40.8% | 26.4% |
| KCTD17       | 79734  | 34.7% | 25.5% | 19.1% | 26.4% |
| SPINK1       | 6690   | 35.0% | 20.0% | 24.3% | 26.4% |
| SNX27        | 81609  | 36.7% | 29.3% | 13.3% | 26.4% |
| DIO2         | 1734   | 33.8% | 23.2% | 22.3% | 26.4% |
| ADCY7        | 113    | 32.2% | 26.0% | 21.1% | 26.4% |
| OSBP18       | 114882 | 33.4% | 21.6% | 24.2% | 26.4% |
| FLJ33860     | 284756 | 27.7% | 21.4% | 30.2% | 26.4% |
| TSGA10       | 80705  | 36.4% | 25.8% | 17.2% | 26.4% |
| LOC90693     | 90693  | 25.7% | 17.4% | 36.2% | 26.4% |
| MAGEA3       | 4102   | 31.9% | 19.8% | 27.6% | 26.4% |
| ST8SIA4      | 7903   | 39.1% | 23.9% | 16.4% | 26.4% |
| SEMA3E       | 9723   | 27.6% | 26.4% | 25.3% | 26.4% |
| NEK1         | 4750   | 33.3% | 29.0% | 17.0% | 26.4% |
| MGC34799     | 284359 | 24.7% | 15.9% | 38.8% | 26.4% |
| PPP1R7       | 5510   | 33.3% | 28.8% | 17.2% | 26.4% |
| MGC2463      | 79037  | 31.5% | 21.6% | 26.3% | 26.4% |
| IRX2         | 153572 | 35.6% | 31.3% | 12.5% | 26.4% |
| CEBPG        | 1054   | 25.8% | 27.5% | 26.0% | 26.4% |
| KIAA1049     | 22980  | 25.1% | 17.8% | 36.4% | 26.4% |
| PDXK         | 8566   | 25.6% | 29.3% | 24.3% | 26.4% |
| OR4F4        | 26682  | 28.6% | 30.5% | 20.3% | 26.4% |
| NTS          | 4922   | 34.2% | 19.7% | 25.4% | 26.4% |
| TIMM8B       | 26521  | 25.6% | 40.6% | 13.1% | 26.4% |
| POP7         | 10248  | 43.5% | 17.7% | 18.2% | 26.4% |
| SLC2A5       | 6518   | 36.7% | 20.5% | 22.1% | 26.4% |
| PCCA         | 5095   | 32.7% | 21.3% | 25.3% | 26.4% |
| VSIG4        | 11326  | 30.1% | 24.1% | 25.2% | 26.5% |
| TLR5         | 7100   | 35.9% | 21.9% | 21.6% | 26.5% |
| THAP7        | 80764  | 32.9% | 25.3% | 21.2% | 26.5% |
| VDAC1        | 7416   | 32.0% | 12.1% | 35.2% | 26.5% |
| TPCN1        | 53373  | 34.0% | 17.3% | 28.1% | 26.5% |
| LMNL         | 89782  | 31.0% | 27.3% | 21.1% | 26.5% |
| ZP3          | 7784   | 39.0% | 18.1% | 22.3% | 26.5% |
| MRRF         | 92399  | 35.8% | 29.4% | 14.2% | 26.5% |
| USP27X       | 389856 | 29.0% | 26.2% | 24.2% | 26.5% |
| BRUNOL6      | 60677  | 37.8% | 17.8% | 23.8% | 26.5% |
| MPI          | 4351   | 32.9% | 28.8% | 17.6% | 26.5% |
| MGC45428     | 166614 | 31.9% | 28.2% | 19.4% | 26.5% |
| DXS1283E     | 8228   | 43.8% | 20.3% | 15.4% | 26.5% |
| LOC440503    | 440503 | 25.5% | 20.3% | 33.5% | 26.5% |
| VGF          | 7425   | 31.1% | 17.5% | 30.8% | 26.5% |
| DKFZP434C131 | 25989  | 30.3% | 25.8% | 23.3% | 26.5% |
| TFEB         | 7942   | 26.5% | 25.2% | 27.7% | 26.5% |
| DPP7         | 29952  | 31.1% | 22.3% | 26.1% | 26.5% |
| FLJ20533     | 54968  | 24.5% | 25.8% | 29.0% | 26.5% |
| LRRIQ1       | 84125  | 38.5% | 20.9% | 20.1% | 26.5% |
| HSMDPKIN     | 55561  | 32.3% | 24.5% | 22.6% | 26.5% |
| FSHPRH1      | 2491   | 36.9% | 19.2% | 23.3% | 26.5% |
| DSCR1L1      | 10231  | 27.4% | 21.8% | 30.2% | 26.5% |
| ITGA10       | 8515   | 21.9% | 26.8% | 30.8% | 26.5% |
| LOC338759    | 359787 | 18.1% | 25.3% | 36.0% | 26.5% |
| KLHL22       | 84861  | 30.9% | 22.8% | 25.7% | 26.5% |
| POM121L2     | 94026  | 23.8% | 30.4% | 25.2% | 26.5% |
| CDH26        | 60437  | 29.0% | 25.0% | 25.4% | 26.5% |



|             |           |       |       |       |       |
|-------------|-----------|-------|-------|-------|-------|
| DMBT1       | 1755      | 28.3% | 22.7% | 28.5% | 26.5% |
| CLSTN1      | 22883     | 31.9% | 22.2% | 25.3% | 26.5% |
| ARF4        | 378       | 37.8% | 18.9% | 22.8% | 26.5% |
| FLJ22555    | 79568     | 18.9% | 24.9% | 35.7% | 26.5% |
| OR51F1      | 256892    | 26.8% | 25.3% | 27.3% | 26.5% |
| PRR3        | 80742     | 39.5% | 19.0% | 21.0% | 26.5% |
| LOC374654   | 374654    | 23.6% | 10.0% | 45.8% | 26.5% |
| PPP2R5C     | 5527      | 23.0% | 36.1% | 20.4% | 26.5% |
| MGC20235    | 113277    | 25.5% | 27.1% | 26.8% | 26.5% |
| NR1H2       | 7376      | 24.2% | 27.5% | 27.8% | 26.5% |
| FLJ32028    | 201799    | 22.3% | 13.2% | 43.9% | 26.5% |
| Nov-01      | 143501    | 26.5% | 20.4% | 32.6% | 26.5% |
| ABCD2       | 225       | 35.6% | 16.4% | 27.5% | 26.5% |
| LOC157697   | 157697    | 30.1% | 16.1% | 33.3% | 26.5% |
| TRY1        | 136541    | 26.1% | 26.0% | 27.3% | 26.5% |
| DSCR4       | 10281     | 21.1% | 24.5% | 33.9% | 26.5% |
| NMNAT2      | 23057     | 34.2% | 15.8% | 29.5% | 26.5% |
| ZNF81       | 347344    | 38.4% | 22.2% | 18.9% | 26.5% |
| GPR152      | 390212    | 20.5% | 29.5% | 29.5% | 26.5% |
| TIMELESS    | 8914      | 35.4% | 17.1% | 27.0% | 26.5% |
| HCK         | 3055      | 29.9% | 31.3% | 18.3% | 26.5% |
| FLJ30596    | 133686    | 24.3% | 24.4% | 30.8% | 26.5% |
| KIAA0522    | 23096     | 28.2% | 18.3% | 33.0% | 26.5% |
| OASL        | 8638      | 36.6% | 15.8% | 27.1% | 26.5% |
| CPA2        | 1358      | 34.7% | 17.9% | 26.9% | 26.5% |
| RCHY1       | 25898     | 21.8% | 29.8% | 27.9% | 26.5% |
| LOC92235    | 92235     | 27.8% | 21.7% | 30.0% | 26.5% |
| LOC143458   | 143458    | 28.8% | 17.4% | 33.3% | 26.5% |
| SLC25A17    | 10478     | 22.2% | 32.4% | 24.9% | 26.5% |
| SLC26A2     | 1836      | 31.7% | 20.6% | 27.2% | 26.5% |
| CTR1        | 1504      | 27.9% | 23.7% | 27.9% | 26.5% |
| RGS12       | 6002      | 32.5% | 24.7% | 22.4% | 26.5% |
| PCDH19      | 57526     | 30.0% | 23.1% | 26.4% | 26.5% |
| GPM6B       | 2824      | 33.6% | 23.3% | 22.6% | 26.5% |
| LY6H        | 4062      | 41.1% | 16.8% | 21.6% | 26.5% |
| C3orf74     | 100128378 | 32.4% | 30.1% | 17.0% | 26.5% |
| CSE1L       | 1434      | 33.4% | 18.3% | 27.8% | 26.5% |
| DEFB129     | 140881    | 21.8% | 29.2% | 28.6% | 26.5% |
| DGCR6       | 8214      | 27.0% | 30.8% | 21.7% | 26.5% |
| G6ORF136    | 221545    | 19.2% | 27.5% | 32.9% | 26.5% |
| KCNU1       | 157855    | 35.7% | 21.3% | 22.5% | 26.5% |
| ATP2B1      | 490       | 40.0% | 19.1% | 20.5% | 26.5% |
| PLEKHA4     | 57664     | 29.3% | 25.2% | 25.0% | 26.5% |
| TCEA3       | 6920      | 32.1% | 22.2% | 25.2% | 26.5% |
| ADPRTL3     | 10039     | 40.3% | 20.9% | 18.3% | 26.5% |
| C13ORF10    | 64062     | 29.9% | 21.2% | 28.5% | 26.5% |
| ORTC1       | 26664     | 33.0% | 24.7% | 21.9% | 26.5% |
| GTTF2E      | 2961      | 33.0% | 22.4% | 24.2% | 26.5% |
| LOC122618   | 122618    | 40.1% | 18.5% | 20.9% | 26.5% |
| C20ORF81    | 64773     | 28.2% | 19.0% | 32.4% | 26.5% |
| FND3        | 22862     | 18.8% | 27.3% | 33.4% | 26.5% |
| CCIN        | 881       | 31.6% | 22.2% | 25.8% | 26.5% |
| TEC         | 7006      | 27.4% | 24.5% | 27.8% | 26.5% |
| CLCN6       | 1185      | 23.7% | 28.2% | 27.7% | 26.5% |
| CAMTA1      | 23261     | 32.7% | 20.2% | 26.7% | 26.5% |
| RNF146      | 81847     | 25.0% | 23.2% | 31.4% | 26.5% |
| SEBOX       | 645832    | 29.6% | 24.6% | 25.4% | 26.5% |
| TUWD12      | 282809    | 20.1% | 21.0% | 38.5% | 26.5% |
| ASB7        | 140460    | 35.1% | 23.0% | 21.5% | 26.5% |
| LOC89887    | 89887     | 29.9% | 24.5% | 25.2% | 26.5% |
| MMP17       | 4326      | 33.3% | 30.0% | 16.3% | 26.5% |
| SH3MD4      | 344558    | 35.5% | 18.5% | 25.5% | 26.5% |
| NID2        | 22795     | 28.7% | 28.2% | 22.8% | 26.5% |
| THBS1       | 7057      | 29.0% | 26.7% | 23.9% | 26.5% |
| PLCL1       | 5334      | 19.0% | 37.3% | 23.4% | 26.5% |
| PHYHIPL     | 84457     | 34.1% | 18.5% | 27.0% | 26.5% |
| LOC90624    | 90624     | 24.1% | 22.1% | 33.5% | 26.5% |
| HRH4        | 59340     | 30.2% | 26.9% | 22.5% | 26.5% |
| HORMAD1     | 84072     | 38.1% | 16.3% | 25.2% | 26.5% |
| YTHDF1      | 54915     | 33.5% | 22.3% | 23.8% | 26.5% |
| BRD3        | 8019      | 26.4% | 31.9% | 21.4% | 26.5% |
| RHOQ        | 23433     | 36.2% | 17.5% | 26.0% | 26.5% |
| XBP1        | 7494      | 33.6% | 26.4% | 19.7% | 26.5% |
| PDIA6       | 10130     | 36.5% | 19.7% | 23.4% | 26.5% |
| CBR1        | 873       | 22.4% | 36.5% | 20.8% | 26.5% |
| EHMT1       | 79813     | 34.6% | 17.3% | 27.8% | 26.5% |
| LRRTM1      | 347730    | 33.5% | 26.8% | 19.3% | 26.6% |
| PLEKHE1     | 23239     | 34.8% | 18.7% | 26.2% | 26.6% |
| NPHP4       | 261734    | 24.2% | 27.0% | 28.4% | 26.6% |
| KIAA0318    | 23504     | 30.7% | 15.6% | 33.3% | 26.6% |
| FLJ31846    | 160857    | 30.0% | 17.2% | 32.4% | 26.6% |
| KRTAP5-3    | 387266    | 36.1% | 18.2% | 25.4% | 26.6% |
| C21ORF45    | 54069     | 38.3% | 22.5% | 18.9% | 26.6% |
| UBE2B       | 7320      | 31.6% | 19.1% | 29.0% | 26.6% |
| ZFP106      | 64397     | 33.9% | 18.9% | 26.9% | 26.6% |
| GLCE        | 26035     | 27.5% | 28.7% | 23.5% | 26.6% |
| DCUN1D3     | 123879    | 32.3% | 10.0% | 37.4% | 26.6% |
| HS6ST3      | 266722    | 44.1% | 12.6% | 23.0% | 26.6% |
| RNF2        | 6045      | 33.7% | 19.7% | 26.3% | 26.6% |
| RP11-95H8.1 | 642265    | 25.8% | 20.2% | 33.8% | 26.6% |
| LOC51760    | 51760     | 34.6% | 20.5% | 24.6% | 26.6% |
| PROS1       | 5627      | 26.2% | 20.1% | 33.3% | 26.6% |
| NDP         | 4693      | 32.4% | 20.6% | 26.8% | 26.6% |
| FEM1B       | 10116     | 31.1% | 27.1% | 21.5% | 26.6% |
| EBPL        | 84650     | 42.0% | 16.8% | 21.0% | 26.6% |
| MGC50811    | 375307    | 32.2% | 31.0% | 16.4% | 26.6% |
| ARD1        | 8260      | 30.1% | 21.1% | 28.6% | 26.6% |
| LOC643904   | 643904    | 34.1% | 21.7% | 23.8% | 26.6% |

|           |        |       |       |       |       |
|-----------|--------|-------|-------|-------|-------|
| ARFIP2    | 23647  | 26.6% | 22.8% | 30.3% | 26.6% |
| NCKIP5D   | 51517  | 34.5% | 23.5% | 21.7% | 26.6% |
| PTPN2     | 5771   | 27.3% | 27.9% | 24.5% | 26.6% |
| TUFM      | 7284   | 29.6% | 21.8% | 28.3% | 26.6% |
| HBLD2     | 81689  | 20.5% | 30.8% | 28.4% | 26.6% |
| ZSWIM2    | 151112 | 26.0% | 16.8% | 36.9% | 26.6% |
| CHGA      | 1113   | 25.5% | 26.8% | 27.4% | 26.6% |
| KIF5A     | 3798   | 32.7% | 19.7% | 27.4% | 26.6% |
| C6ORF66   | 29078  | 28.4% | 26.4% | 25.0% | 26.6% |
| DEPDC2    | 80243  | 34.5% | 25.8% | 19.4% | 26.6% |
| GTPBP4    | 23560  | 28.6% | 22.3% | 28.8% | 26.6% |
| ITTC8     | 123016 | 31.9% | 21.7% | 26.1% | 26.6% |
| HTR7      | 3363   | 28.0% | 18.7% | 33.1% | 26.6% |
| GUCY1A3   | 2982   | 32.5% | 26.0% | 21.2% | 26.6% |
| ZNF198    | 7750   | 28.0% | 24.4% | 27.4% | 26.6% |
| SEMA3A    | 10371  | 26.8% | 23.0% | 29.9% | 26.6% |
| LGALS1    | 3956   | 32.2% | 22.5% | 25.1% | 26.6% |
| OXCT1     | 5019   | 41.6% | 14.6% | 23.6% | 26.6% |
| LOC283431 | 283431 | 28.5% | 19.6% | 31.6% | 26.6% |
| BTG1      | 694    | 30.1% | 24.9% | 24.8% | 26.6% |
| CX36      | 57369  | 32.0% | 14.0% | 33.8% | 26.6% |
| CASKIN1   | 57524  | 46.9% | 15.5% | 17.3% | 26.6% |
| PEPP3     | 22874  | 22.4% | 21.2% | 36.2% | 26.6% |
| KIAA1456  | 57604  | 36.1% | 26.3% | 17.4% | 26.6% |
| LOC257106 | 257106 | 34.2% | 16.9% | 28.7% | 26.6% |
| FRMPD1    | 22844  | 27.4% | 25.9% | 26.5% | 26.6% |
| ARHGFE3   | 50650  | 25.5% | 21.6% | 32.6% | 26.6% |
| TAS2R40   | 259286 | 30.3% | 28.8% | 20.8% | 26.6% |
| CCR6      | 1235   | 26.6% | 23.6% | 29.5% | 26.6% |
| MEPE      | 56955  | 32.8% | 23.7% | 23.2% | 26.6% |
| MRPL40    | 64976  | 35.1% | 22.4% | 22.4% | 26.6% |
| SATB2     | 23314  | 29.3% | 25.8% | 24.7% | 26.6% |
| VPREB3    | 29802  | 30.4% | 26.0% | 23.3% | 26.6% |
| KIAA1374  | 57560  | 19.4% | 21.8% | 38.6% | 26.6% |
| TMEM25    | 84866  | 21.6% | 30.0% | 28.2% | 26.6% |
| UBP1      | 7342   | 34.7% | 22.8% | 22.3% | 26.6% |
| TR2IT1    | 645840 | 25.9% | 28.5% | 25.4% | 26.6% |
| MGC33835  | 222662 | 26.1% | 13.8% | 39.9% | 26.6% |
| C14ORF129 | 51527  | 36.2% | 16.6% | 27.1% | 26.6% |
| KIAA0100  | 9703   | 30.2% | 26.0% | 23.6% | 26.6% |
| OR8K5     | 219453 | 30.9% | 22.8% | 26.1% | 26.6% |
| TNFSF15   | 9966   | 29.9% | 22.2% | 27.7% | 26.6% |
| LEMD1     | 93273  | 39.3% | 17.1% | 23.4% | 26.6% |
| FBXO6     | 26270  | 29.1% | 23.7% | 27.1% | 26.6% |
| BNIP1     | 662    | 29.9% | 21.3% | 28.6% | 26.6% |
| MGC35043  | 255119 | 33.5% | 20.2% | 26.1% | 26.6% |
| CAV2      | 858    | 27.5% | 30.1% | 22.2% | 26.6% |
| SQSTM1    | 8878   | 27.4% | 23.5% | 28.9% | 26.6% |
| EPB41L1   | 2036   | 27.3% | 21.4% | 31.1% | 26.6% |
| LOC143241 | 143241 | 16.0% | 31.7% | 32.2% | 26.6% |
| FLJ36004  | 160492 | 15.1% | 27.0% | 37.8% | 26.6% |
| PCBP3     | 54039  | 24.6% | 34.0% | 21.3% | 26.6% |
| USP6      | 9098   | 31.4% | 18.9% | 29.5% | 26.6% |
| IRX1      | 79192  | 32.9% | 22.1% | 24.9% | 26.6% |
| ZNF307    | 387032 | 35.7% | 21.1% | 23.0% | 26.6% |
| CD109     | 135228 | 30.1% | 19.3% | 30.5% | 26.6% |
| PTPRD     | 5789   | 27.1% | 30.6% | 22.2% | 26.6% |
| SUMO2     | 6613   | 34.1% | 25.3% | 20.5% | 26.6% |
| TGFB2     | 7048   | 23.2% | 28.5% | 28.3% | 26.6% |
| DNM3      | 26052  | 25.4% | 27.3% | 27.2% | 26.6% |
| NYD-SP18  | 84691  | 39.7% | 12.7% | 27.5% | 26.6% |
| LIPH      | 200879 | 24.7% | 30.1% | 25.1% | 26.6% |
| ATP5S     | 27109  | 41.0% | 20.4% | 18.5% | 26.6% |
| WDR71     | 80227  | 28.5% | 19.1% | 32.3% | 26.6% |
| COASY     | 80347  | 29.9% | 24.0% | 26.0% | 26.6% |
| TRERF1    | 55809  | 35.6% | 24.3% | 19.9% | 26.6% |
| DNAJD1    | 29103  | 30.6% | 19.3% | 30.0% | 26.6% |
| OR9G1     | 390174 | 29.9% | 29.3% | 20.6% | 26.6% |
| THG-1     | 81628  | 32.1% | 23.1% | 24.8% | 26.6% |
| PPL       | 5493   | 28.8% | 16.5% | 34.6% | 26.6% |
| MAP3K5    | 4217   | 20.6% | 29.8% | 29.5% | 26.6% |
| GRIPAP1   | 56850  | 22.2% | 34.8% | 22.9% | 26.6% |
| KRT10     | 3858   | 31.5% | 30.1% | 18.2% | 26.6% |
| OSR2      | 116039 | 27.2% | 22.4% | 30.3% | 26.6% |
| PRSS3     | 5646   | 23.4% | 24.5% | 32.0% | 26.6% |
| MYO7B     | 4648   | 33.6% | 23.7% | 22.7% | 26.6% |
| SP100     | 6672   | 32.8% | 28.3% | 18.9% | 26.6% |
| LOC130940 | 130940 | 37.2% | 26.7% | 16.0% | 26.6% |
| GLUD2     | 2747   | 29.0% | 25.3% | 25.7% | 26.6% |
| PRDM10    | 56980  | 25.1% | 28.8% | 26.0% | 26.6% |
| LACTB     | 114294 | 35.8% | 15.4% | 28.8% | 26.6% |
| CHRM1     | 1128   | 24.1% | 24.5% | 31.3% | 26.6% |
| CTPS      | 1503   | 32.9% | 17.6% | 29.5% | 26.6% |
| NDFIP1    | 80762  | 25.3% | 25.2% | 29.4% | 26.6% |
| NEB       | 4703   | 30.4% | 15.3% | 34.3% | 26.7% |
| VANGL1    | 81839  | 31.7% | 24.6% | 23.7% | 26.7% |
| BTN2A1    | 11120  | 34.4% | 32.6% | 13.0% | 26.7% |
| ART3      | 419    | 35.1% | 20.1% | 24.8% | 26.7% |
| ARC       | 23237  | 33.0% | 19.0% | 28.0% | 26.7% |
| IL2RB     | 3560   | 18.8% | 38.6% | 22.6% | 26.7% |
| STX6      | 10228  | 45.3% | 19.4% | 15.3% | 26.7% |
| OR11G2    | 390439 | 35.0% | 18.0% | 27.0% | 26.7% |
| ZNF263    | 10127  | 37.1% | 20.4% | 22.5% | 26.7% |
| HSPC121   | 51495  | 29.8% | 19.9% | 30.3% | 26.7% |
| GEMIN7    | 79760  | 29.4% | 29.6% | 20.9% | 26.7% |
| ALDH1B1   | 219    | 33.6% | 17.2% | 29.2% | 26.7% |
| ORSR1     | 219479 | 32.8% | 27.8% | 19.4% | 26.7% |
| CNTNAP1   | 8506   | 30.0% | 29.4% | 20.6% | 26.7% |

|               |        |       |       |       |       |
|---------------|--------|-------|-------|-------|-------|
| RBM18         | 92400  | 33.8% | 23.7% | 22.4% | 26.7% |
| KIAA1971      | 123720 | 21.2% | 24.4% | 34.5% | 26.7% |
| FLJ10637      | 55726  | 22.8% | 24.8% | 32.3% | 26.7% |
| MLZE          | 56169  | 39.3% | 20.0% | 20.7% | 26.7% |
| UBPH          | 56061  | 21.8% | 25.0% | 33.2% | 26.7% |
| MGC40397      | 121053 | 30.6% | 21.7% | 27.7% | 26.7% |
| SPTBN4        | 57731  | 21.1% | 26.1% | 32.8% | 26.7% |
| CTSB          | 1508   | 27.5% | 23.8% | 28.7% | 26.7% |
| TRAF5         | 7188   | 33.7% | 22.4% | 23.8% | 26.7% |
| AOC3          | 8639   | 40.9% | 21.2% | 18.0% | 26.7% |
| ADAMDEC1      | 27299  | 34.7% | 28.1% | 17.2% | 26.7% |
| SLC26A10      | 65012  | 33.3% | 20.4% | 26.3% | 26.7% |
| C2ORF26       | 65124  | 19.6% | 22.9% | 37.6% | 26.7% |
| GABRA4        | 2557   | 33.2% | 24.1% | 22.8% | 26.7% |
| ARMC2         | 84071  | 33.6% | 25.5% | 20.9% | 26.7% |
| BCL11A        | 53335  | 29.7% | 22.5% | 27.7% | 26.7% |
| OSRF          | 23548  | 24.1% | 28.5% | 27.5% | 26.7% |
| SIPA1L1       | 26037  | 33.8% | 23.7% | 22.5% | 26.7% |
| KIAA0998      | 23093  | 17.9% | 32.6% | 29.5% | 26.7% |
| RRH           | 10692  | 34.6% | 23.8% | 21.7% | 26.7% |
| RPE           | 6120   | 27.6% | 29.4% | 23.0% | 26.7% |
| MGAT3         | 4248   | 27.6% | 23.9% | 28.4% | 26.7% |
| FLJ34922      | 91607  | 29.2% | 18.2% | 32.6% | 26.7% |
| MS44A4        | 51338  | 14.4% | 26.8% | 38.8% | 26.7% |
| LEREP04       | 55854  | 30.6% | 21.3% | 28.2% | 26.7% |
| ERN1          | 2081   | 21.9% | 24.6% | 33.4% | 26.7% |
| ZZEF1         | 23140  | 27.3% | 15.7% | 37.1% | 26.7% |
| NODAL         | 4838   | 27.3% | 26.7% | 26.1% | 26.7% |
| HABP4         | 22927  | 39.4% | 24.9% | 15.7% | 26.7% |
| PROC          | 5624   | 28.8% | 21.3% | 29.9% | 26.7% |
| PTCHD3        | 374308 | 29.5% | 20.7% | 29.8% | 26.7% |
| NMUR1         | 10316  | 31.3% | 23.3% | 25.5% | 26.7% |
| SPINK2        | 6691   | 27.8% | 16.5% | 35.7% | 26.7% |
| ACTN2         | 88     | 34.3% | 23.2% | 22.6% | 26.7% |
| BPY2          | 9083   | 31.4% | 27.4% | 21.3% | 26.7% |
| LOC751071     | 751071 | 27.7% | 28.9% | 23.5% | 26.7% |
| EEF1A1        | 1915   | 34.0% | 25.0% | 21.1% | 26.7% |
| CHCHD1        | 118487 | 36.7% | 25.3% | 18.0% | 26.7% |
| CYBRD1        | 79901  | 35.3% | 24.4% | 20.4% | 26.7% |
| GNG3          | 2785   | 37.3% | 21.2% | 21.6% | 26.7% |
| MR-1          | 25953  | 18.7% | 27.5% | 33.9% | 26.7% |
| F10           | 2159   | 35.5% | 33.5% | 11.1% | 26.7% |
| TRIM75        | 391714 | 35.4% | 20.4% | 24.2% | 26.7% |
| PRSS25        | 27429  | 38.2% | 28.9% | 13.0% | 26.7% |
| PVRL1         | 5818   | 32.2% | 26.6% | 21.2% | 26.7% |
| C9ORF80       | 58493  | 21.5% | 23.6% | 35.0% | 26.7% |
| C6ORF93       | 84946  | 27.5% | 21.5% | 31.1% | 26.7% |
| C1ORF38       | 9473   | 32.8% | 16.4% | 30.8% | 26.7% |
| EIF2C2        | 27161  | 33.5% | 17.4% | 29.2% | 26.7% |
| GNAZ          | 2781   | 40.5% | 26.1% | 13.4% | 26.7% |
| LOC255798     | 255798 | 16.0% | 30.8% | 33.2% | 26.7% |
| LRP16         | 28992  | 25.5% | 27.0% | 27.5% | 26.7% |
| DNAJC8        | 22826  | 24.2% | 20.5% | 35.5% | 26.7% |
| C20ORF77      | 58490  | 27.6% | 24.7% | 27.9% | 26.7% |
| TPPP          | 11076  | 29.4% | 26.8% | 23.9% | 26.7% |
| SLC19A2       | 10560  | 29.5% | 23.9% | 26.8% | 26.7% |
| PIP           | 5304   | 37.0% | 25.3% | 17.8% | 26.7% |
| MUC1          | 4582   | 34.3% | 19.3% | 26.4% | 26.7% |
| CTSW          | 1521   | 28.5% | 24.1% | 27.5% | 26.7% |
| HS3ST3A1      | 9955   | 35.1% | 25.1% | 19.9% | 26.7% |
| MC4R          | 4160   | 20.7% | 30.3% | 29.1% | 26.7% |
| OGG1          | 4968   | 28.9% | 25.8% | 25.4% | 26.7% |
| NYREN18       | 51667  | 27.4% | 19.5% | 33.1% | 26.7% |
| TTR           | 7276   | 42.9% | 17.7% | 19.5% | 26.7% |
| NFIL3         | 4783   | 30.4% | 24.1% | 25.6% | 26.7% |
| FLJ10922      | 55260  | 10.3% | 41.6% | 28.2% | 26.7% |
| C10ORF118     | 55088  | 25.9% | 27.7% | 26.5% | 26.7% |
| RAI1          | 10743  | 22.2% | 25.5% | 32.4% | 26.7% |
| MYO3A         | 53904  | 28.6% | 26.5% | 25.0% | 26.7% |
| SCUBE2        | 57758  | 39.6% | 19.3% | 21.2% | 26.7% |
| PRKCN         | 23683  | 29.5% | 24.7% | 25.9% | 26.7% |
| NME3          | 4832   | 25.3% | 25.0% | 29.9% | 26.7% |
| SYT2          | 127833 | 29.5% | 25.6% | 25.1% | 26.7% |
| CDC2          | 983    | 29.4% | 30.9% | 19.9% | 26.7% |
| TIGD2         | 166815 | 22.3% | 39.8% | 18.0% | 26.7% |
| ASB17         | 127247 | 36.2% | 22.9% | 21.1% | 26.7% |
| ITSN1         | 6453   | 31.7% | 21.0% | 27.5% | 26.7% |
| LCMT1         | 51451  | 31.4% | 21.0% | 27.8% | 26.7% |
| NVD-SP26      | 85438  | 32.9% | 16.4% | 30.9% | 26.7% |
| DYSF          | 8291   | 33.3% | 27.5% | 19.3% | 26.7% |
| FNDC1         | 84624  | 38.1% | 14.8% | 27.2% | 26.7% |
| DKFZP434C0631 | 144203 | 23.6% | 24.7% | 31.8% | 26.7% |
| LOC339184     | 339184 | 25.3% | 24.0% | 30.9% | 26.7% |
| SYNJ1         | 8867   | 22.0% | 36.3% | 21.9% | 26.7% |
| TNFSF11       | 8600   | 30.1% | 24.6% | 25.5% | 26.7% |
| GDI1          | 2664   | 32.8% | 21.3% | 26.0% | 26.7% |
| STRC          | 161497 | 31.5% | 25.2% | 23.5% | 26.7% |
| SLC1A5        | 6510   | 35.1% | 17.8% | 27.4% | 26.7% |
| VANGL2        | 57216  | 15.3% | 37.2% | 27.6% | 26.7% |
| DRD2          | 1813   | 24.0% | 32.0% | 24.2% | 26.7% |
| CHST2         | 9435   | 32.6% | 19.6% | 28.0% | 26.7% |
| MLL           | 4297   | 34.7% | 22.8% | 22.6% | 26.7% |
| C11ORF9       | 745    | 37.4% | 23.3% | 19.4% | 26.7% |
| OOSP          | 83882  | 29.3% | 24.2% | 26.7% | 26.7% |
| SHC2          | 25759  | 23.1% | 35.0% | 22.1% | 26.7% |
| CENTB2        | 23527  | 37.8% | 20.6% | 21.8% | 26.7% |
| FMO2          | 2327   | 29.7% | 24.4% | 26.1% | 26.7% |
| LOC146713     | 146713 | 24.0% | 24.8% | 31.4% | 26.7% |

|                |           |       |       |       |       |
|----------------|-----------|-------|-------|-------|-------|
| BICD2          | 23299     | 41.4% | 21.1% | 17.8% | 26.7% |
| BCL7A          | 605       | 27.4% | 26.6% | 26.2% | 26.7% |
| LGR5           | 8549      | 34.9% | 23.4% | 21.8% | 26.7% |
| BETA4GALNAC-T4 | 338707    | 35.6% | 17.7% | 26.9% | 26.7% |
| ICAM4          | 3386      | 34.0% | 21.8% | 24.4% | 26.7% |
| PABPC5         | 140886    | 30.3% | 31.7% | 18.2% | 26.7% |
| FLJ25006       | 124923    | 23.9% | 26.9% | 29.4% | 26.7% |
| TFPI           | 7035      | 22.3% | 31.5% | 26.4% | 26.7% |
| CASQ1          | 844       | 30.6% | 30.8% | 18.8% | 26.7% |
| ZBTB26         | 57684     | 24.5% | 19.8% | 35.9% | 26.7% |
| RORA           | 6095      | 25.3% | 22.1% | 32.9% | 26.7% |
| SCRT1          | 83482     | 37.2% | 26.8% | 16.3% | 26.7% |
| HIST1H2BK      | 85236     | 32.4% | 24.5% | 23.4% | 26.7% |
| C16ORF7        | 9605      | 19.1% | 39.4% | 21.6% | 26.7% |
| CLEC4C         | 170482    | 35.9% | 17.2% | 27.1% | 26.7% |
| CDC42BPB       | 9578      | 25.3% | 29.2% | 25.8% | 26.7% |
| HNF4G          | 3174      | 30.6% | 17.2% | 32.5% | 26.7% |
| BMP8A          | 353500    | 32.8% | 24.2% | 23.3% | 26.7% |
| TSPAN11        | 441631    | 33.3% | 20.5% | 26.4% | 26.7% |
| HMGCS2         | 3158      | 29.0% | 16.1% | 35.1% | 26.7% |
| SLC9A3R1       | 9368      | 43.6% | 12.4% | 24.3% | 26.8% |
| LEPROTL1       | 23484     | 34.4% | 23.7% | 22.1% | 26.8% |
| LOC343066      | 343066    | 30.6% | 15.9% | 33.7% | 26.8% |
| WFDC10B        | 280664    | 29.1% | 22.9% | 28.3% | 26.8% |
| OR5K3          | 403277    | 28.0% | 23.8% | 28.5% | 26.8% |
| SLC1A1         | 6505      | 28.7% | 23.4% | 28.2% | 26.8% |
| PLAGL1         | 5325      | 34.7% | 23.2% | 22.3% | 26.8% |
| MG15476        | 147906    | 18.8% | 28.9% | 32.6% | 26.8% |
| PCK2           | 5106      | 25.0% | 35.8% | 19.4% | 26.8% |
| GCHFR          | 2644      | 29.8% | 27.8% | 22.7% | 26.8% |
| TPM3           | 7170      | 36.1% | 28.9% | 15.3% | 26.8% |
| CXorf34        | 79979     | 32.1% | 28.4% | 19.8% | 26.8% |
| C9ORF72        | 203228    | 23.8% | 33.3% | 23.1% | 26.8% |
| NME7           | 29922     | 31.3% | 24.5% | 24.5% | 26.8% |
| OR1D4          | 8385      | 36.2% | 22.0% | 22.0% | 26.8% |
| GLRXL          | 100132510 | 26.0% | 33.3% | 21.0% | 26.8% |
| TP53RK         | 112858    | 22.9% | 26.3% | 31.1% | 26.8% |
| FLJ13386       | 80254     | 36.5% | 15.8% | 28.0% | 26.8% |
| CEP72          | 55722     | 28.9% | 19.5% | 31.9% | 26.8% |
| DLGAP3         | 58512     | 31.6% | 22.4% | 26.3% | 26.8% |
| GNAT2          | 2780      | 25.2% | 30.8% | 24.4% | 26.8% |
| SIGLEC11       | 89858     | 28.1% | 25.9% | 26.2% | 26.8% |
| INPP5A         | 3632      | 26.5% | 33.3% | 20.5% | 26.8% |
| KNSL8          | 89953     | 29.0% | 22.2% | 29.2% | 26.8% |
| DKFZP434C0328  | 54762     | 42.9% | 16.4% | 21.1% | 26.8% |
| FLNB           | 2317      | 41.9% | 20.2% | 18.3% | 26.8% |
| FLJ10786       | 55231     | 16.6% | 28.4% | 35.3% | 26.8% |
| PHC2           | 1912      | 29.4% | 20.6% | 30.3% | 26.8% |
| OR52J3         | 119679    | 34.0% | 23.6% | 22.7% | 26.8% |
| CAPN11         | 11131     | 23.1% | 24.9% | 32.3% | 26.8% |
| MGC4293        | 83475     | 35.6% | 27.7% | 17.0% | 26.8% |
| C1ORF35        | 79169     | 30.1% | 22.5% | 27.7% | 26.8% |
| C20ORF116      | 65992     | 25.0% | 25.5% | 29.8% | 26.8% |
| OBSCN          | 84033     | 30.9% | 17.8% | 31.6% | 26.8% |
| FLJ11336       | 55346     | 30.9% | 25.3% | 24.2% | 26.8% |
| RAB3B          | 5865      | 41.6% | 15.2% | 23.5% | 26.8% |
| RIOK1          | 83732     | 30.5% | 27.9% | 21.9% | 26.8% |
| C7ORF24        | 79017     | 35.5% | 23.8% | 21.1% | 26.8% |
| DKFZP547E1010  | 26097     | 17.7% | 31.2% | 31.4% | 26.8% |
| GUCA2A         | 2980      | 36.9% | 22.1% | 21.3% | 26.8% |
| ACTR3          | 10096     | 31.8% | 16.3% | 32.2% | 26.8% |
| DAPK2          | 23604     | 24.1% | 27.6% | 28.6% | 26.8% |
| LGTN           | 1939      | 35.7% | 16.4% | 28.2% | 26.8% |
| IER3IP1        | 51124     | 32.8% | 21.7% | 25.8% | 26.8% |
| SEC31L2        | 25956     | 31.8% | 20.7% | 27.8% | 26.8% |
| FLJ10300       | 55112     | 13.7% | 31.5% | 35.2% | 26.8% |
| PRDX4          | 10549     | 31.3% | 18.6% | 30.4% | 26.8% |
| E2F7           | 144455    | 37.2% | 22.5% | 20.6% | 26.8% |
| CXCL9          | 4283      | 30.7% | 20.7% | 29.0% | 26.8% |
| PHC3           | 80012     | 25.0% | 31.6% | 23.7% | 26.8% |
| OR52A5         | 390054    | 37.5% | 20.7% | 22.2% | 26.8% |
| CDYL           | 9425      | 29.1% | 17.3% | 33.9% | 26.8% |
| LOC130106      | 130106    | 31.4% | 26.5% | 22.4% | 26.8% |
| BSN            | 8927      | 34.3% | 20.1% | 25.9% | 26.8% |
| FUT10          | 84750     | 31.4% | 19.8% | 29.2% | 26.8% |
| FLJ32110       | 219578    | 25.1% | 22.1% | 33.2% | 26.8% |
| CORT           | 1325      | 33.7% | 24.2% | 22.5% | 26.8% |
| LOC196264      | 196264    | 33.0% | 17.6% | 29.7% | 26.8% |
| COLEC11        | 78989     | 24.3% | 24.0% | 32.0% | 26.8% |
| KIAA1815       | 79956     | 35.0% | 28.1% | 17.3% | 26.8% |
| FLJ32384       | 124790    | 27.5% | 15.0% | 37.8% | 26.8% |
| SLC25A14       | 9016      | 23.9% | 27.5% | 29.0% | 26.8% |
| KIAA2028       | 130271    | 29.8% | 24.0% | 26.6% | 26.8% |
| DNAPTP6        | 26010     | 22.5% | 23.2% | 34.7% | 26.8% |
| DDX56          | 54606     | 32.5% | 17.9% | 30.1% | 26.8% |
| MYH4           | 4622      | 49.1% | 13.8% | 17.5% | 26.8% |
| TNFRSF9        | 3604      | 31.8% | 17.5% | 31.1% | 26.8% |
| RTBDN          | 83546     | 41.3% | 16.1% | 23.1% | 26.8% |
| FLJ21687       | 79917     | 27.6% | 31.0% | 21.8% | 26.8% |
| HSPCA          | 3320      | 37.1% | 15.6% | 27.7% | 26.8% |
| UNQ467         | 388533    | 34.5% | 23.7% | 22.2% | 26.8% |
| XK             | 7504      | 25.8% | 26.9% | 27.7% | 26.8% |
| TORC3          | 64784     | 23.7% | 28.4% | 28.3% | 26.8% |
| OR4D11         | 219986    | 37.9% | 19.6% | 22.9% | 26.8% |
| GIPC2          | 54810     | 25.9% | 30.2% | 24.3% | 26.8% |
| SNAI1          | 6615      | 28.2% | 32.3% | 19.9% | 26.8% |
| NCOA6          | 23054     | 27.1% | 24.3% | 29.0% | 26.8% |
| UBXD3          | 127733    | 30.5% | 21.5% | 28.5% | 26.8% |

|              |        |       |       |       |       |
|--------------|--------|-------|-------|-------|-------|
| PRSS16       | 10279  | 33.9% | 18.4% | 28.0% | 26.8% |
| EML1         | 2009   | 37.6% | 15.8% | 27.0% | 26.8% |
| LTBP3        | 4054   | 34.7% | 18.8% | 26.9% | 26.8% |
| JMJD1B       | 51780  | 45.1% | 21.3% | 14.1% | 26.8% |
| KIF14        | 9928   | 37.2% | 18.5% | 24.7% | 26.8% |
| ZNF331       | 55422  | 33.1% | 28.8% | 18.6% | 26.8% |
| ATP1B4       | 23439  | 32.0% | 22.6% | 25.8% | 26.8% |
| RPL3L        | 6123   | 37.9% | 16.8% | 25.8% | 26.8% |
| KL           | 9365   | 38.0% | 15.0% | 27.4% | 26.8% |
| GEFT         | 115557 | 26.6% | 30.4% | 23.5% | 26.8% |
| CANX         | 821    | 38.6% | 16.8% | 25.1% | 26.8% |
| TIGD6        | 81789  | 21.3% | 33.0% | 26.2% | 26.8% |
| SYCP3        | 50511  | 26.2% | 30.7% | 23.6% | 26.8% |
| EPPK1        | 83481  | 36.9% | 20.1% | 23.4% | 26.8% |
| GNAS         | 2778   | 25.3% | 35.1% | 20.1% | 26.8% |
| KPNA4        | 3840   | 41.3% | 16.8% | 22.3% | 26.8% |
| PNLIPRP3     | 119548 | 28.9% | 22.4% | 29.1% | 26.8% |
| MGC33846     | 220382 | 28.9% | 25.0% | 26.5% | 26.8% |
| TERF1        | 7013   | 32.6% | 23.6% | 24.2% | 26.8% |
| C3AR1        | 719    | 23.4% | 32.6% | 24.4% | 26.8% |
| PEX3         | 8504   | 32.1% | 24.6% | 23.8% | 26.8% |
| FLJ11164     | 55316  | 18.2% | 30.7% | 31.6% | 26.8% |
| MEF2D        | 4209   | 30.3% | 19.8% | 30.4% | 26.8% |
| MYO22        | 51778  | 22.4% | 23.1% | 35.0% | 26.8% |
| BRI3         | 25798  | 34.1% | 18.8% | 27.5% | 26.8% |
| ESX1L        | 80712  | 24.6% | 22.8% | 33.1% | 26.8% |
| MELL1        | 79258  | 33.3% | 23.9% | 23.3% | 26.8% |
| FAM12A       | 10876  | 17.4% | 37.0% | 26.1% | 26.8% |
| APIN         | 54959  | 26.6% | 26.2% | 27.7% | 26.8% |
| S100A14      | 57402  | 31.7% | 19.8% | 29.0% | 26.8% |
| MCL1         | 4170   | 37.0% | 18.5% | 25.0% | 26.8% |
| CAMK1G       | 57172  | 31.2% | 32.7% | 16.6% | 26.8% |
| RASGRP4      | 115727 | 41.9% | 18.5% | 20.2% | 26.8% |
| FLJ20331     | 55631  | 28.2% | 15.2% | 37.1% | 26.8% |
| LOC643418    | 643418 | 34.6% | 20.8% | 25.1% | 26.8% |
| ATP6V1B2     | 526    | 31.3% | 27.7% | 21.5% | 26.8% |
| RREB1        | 6239   | 26.6% | 27.6% | 26.4% | 26.8% |
| RIN3         | 79890  | 35.3% | 18.0% | 27.2% | 26.8% |
| CRTAC1       | 55118  | 24.9% | 26.0% | 29.7% | 26.8% |
| T            | 6862   | 27.8% | 25.0% | 27.8% | 26.8% |
| TNNC2        | 7125   | 33.3% | 17.4% | 29.8% | 26.8% |
| TP53BP2      | 7159   | 29.9% | 25.0% | 25.7% | 26.8% |
| TWSG1        | 57045  | 43.3% | 21.6% | 15.7% | 26.8% |
| FLJ25773     | 283598 | 21.9% | 31.2% | 27.5% | 26.8% |
| FLJ20519     | 54964  | 22.5% | 19.4% | 38.6% | 26.8% |
| NDST3        | 9348   | 29.2% | 30.9% | 20.5% | 26.8% |
| DTX3         | 196403 | 46.7% | 7.7%  | 26.2% | 26.8% |
| PTMS         | 5763   | 22.7% | 25.3% | 32.6% | 26.9% |
| C7ORF28A     | 51622  | 40.7% | 24.3% | 15.6% | 26.9% |
| POLR3D       | 661    | 39.3% | 26.1% | 15.1% | 26.9% |
| KIAA0433     | 23262  | 27.6% | 26.7% | 26.2% | 26.9% |
| LRBA         | 987    | 32.7% | 26.6% | 21.3% | 26.9% |
| NFIC         | 4782   | 24.4% | 25.8% | 30.4% | 26.9% |
| ATF7IP2      | 80063  | 33.0% | 25.2% | 22.4% | 26.9% |
| CDC2L2       | 728642 | 28.8% | 24.1% | 27.6% | 26.9% |
| KDELR1       | 10945  | 39.5% | 24.3% | 16.7% | 26.9% |
| CDH3         | 1001   | 28.3% | 21.3% | 30.9% | 26.9% |
| ZDHH21       | 340481 | 38.5% | 22.7% | 19.4% | 26.9% |
| VRK2         | 7444   | 29.6% | 22.5% | 28.4% | 26.9% |
| KCTD16       | 57528  | 28.6% | 27.8% | 24.2% | 26.9% |
| TINF2        | 26277  | 12.0% | 34.3% | 34.3% | 26.9% |
| IMAGE3451454 | 116841 | 21.8% | 21.0% | 37.8% | 26.9% |
| GBX2         | 2637   | 35.1% | 18.7% | 26.8% | 26.9% |
| RAB3-GAP150  | 25782  | 36.8% | 16.4% | 27.4% | 26.9% |
| EIF2S1       | 1965   | 28.8% | 25.1% | 26.7% | 26.9% |
| RPL7L1       | 285855 | 26.3% | 30.3% | 23.9% | 26.9% |
| CCKBR        | 887    | 26.0% | 30.1% | 24.4% | 26.9% |
| TM9SF2       | 9375   | 33.8% | 27.8% | 19.0% | 26.9% |
| IL13RA2      | 3598   | 27.4% | 28.6% | 24.6% | 26.9% |
| ABC1         | 63897  | 22.9% | 24.4% | 33.2% | 26.9% |
| CCDC8        | 83987  | 41.0% | 15.7% | 23.9% | 26.9% |
| PIGW         | 284098 | 26.4% | 23.2% | 31.0% | 26.9% |
| ZMYND11      | 10771  | 31.5% | 24.5% | 24.6% | 26.9% |
| CORO7        | 79585  | 24.4% | 30.9% | 25.3% | 26.9% |
| LENG9        | 94059  | 35.5% | 23.6% | 21.4% | 26.9% |
| DAZAP2       | 9802   | 39.5% | 24.9% | 16.3% | 26.9% |
| OR8U8        | 504189 | 24.6% | 17.9% | 38.1% | 26.9% |
| KIAA1853     | 84530  | 39.0% | 19.9% | 21.7% | 26.9% |
| TAS2R1       | 50834  | 38.3% | 18.4% | 23.9% | 26.9% |
| PPM1B        | 5495   | 31.2% | 29.5% | 20.0% | 26.9% |
| C6ORF210     | 57107  | 31.6% | 26.4% | 22.6% | 26.9% |
| TRAP1        | 10131  | 32.9% | 17.7% | 30.1% | 26.9% |
| NQO1         | 1728   | 33.1% | 24.8% | 22.8% | 26.9% |
| GCM1         | 8521   | 32.7% | 24.2% | 23.8% | 26.9% |
| D4S234E      | 27065  | 35.5% | 18.1% | 27.1% | 26.9% |
| DIRC1        | 116093 | 38.1% | 20.1% | 22.5% | 26.9% |
| IL23A        | 51561  | 24.2% | 26.5% | 30.0% | 26.9% |
| SLC30A1      | 7779   | 38.1% | 17.7% | 24.9% | 26.9% |
| ZNF228       | 7771   | 34.7% | 21.2% | 24.8% | 26.9% |
| BAP1         | 8314   | 39.2% | 23.2% | 18.3% | 26.9% |
| LOC56931     | 56931  | 25.0% | 37.5% | 18.2% | 26.9% |
| LOC131149    | 131149 | 26.2% | 24.2% | 30.2% | 26.9% |
| OR6N1        | 128372 | 49.0% | 21.3% | 10.4% | 26.9% |
| RLN2         | 6019   | 30.0% | 23.8% | 26.9% | 26.9% |
| GPR125       | 166647 | 22.5% | 33.5% | 24.7% | 26.9% |
| MAGOH        | 4116   | 24.3% | 26.9% | 29.6% | 26.9% |
| DKFZ434G0522 | 54758  | 25.6% | 11.8% | 43.3% | 26.9% |
| MPHOSPH1     | 9585   | 43.1% | 16.0% | 21.6% | 26.9% |

|           |        |       |       |       |       |
|-----------|--------|-------|-------|-------|-------|
| YVHAZ     | 7534   | 34.9% | 25.0% | 20.8% | 26.9% |
| RABL2B    | 11158  | 35.7% | 17.9% | 27.1% | 26.9% |
| LOC440348 | 440348 | 45.3% | 19.0% | 16.3% | 26.9% |
| CREG2     | 200407 | 30.2% | 30.9% | 19.6% | 26.9% |
| C1RL      | 51279  | 32.1% | 25.5% | 23.2% | 26.9% |
| RVK       | 6259   | 24.7% | 30.4% | 25.7% | 26.9% |
| TOMM7     | 54543  | 24.6% | 35.7% | 20.4% | 26.9% |
| TEBP      | 10728  | 31.3% | 14.3% | 35.1% | 26.9% |
| DDHD1     | 80821  | 31.1% | 24.2% | 25.4% | 26.9% |
| TRPM5     | 29850  | 35.9% | 18.1% | 26.8% | 26.9% |
| ZNF37A    | 7587   | 31.3% | 22.7% | 26.7% | 26.9% |
| PPIB      | 5479   | 26.5% | 24.1% | 30.2% | 26.9% |
| PITPNM3   | 83394  | 32.1% | 21.7% | 27.0% | 26.9% |
| C14ORF169 | 79697  | 33.3% | 21.7% | 25.7% | 26.9% |
| EPHA4     | 2043   | 27.1% | 26.6% | 27.1% | 26.9% |
| ZBTB24    | 9841   | 25.5% | 32.8% | 22.5% | 26.9% |
| PLA2R1    | 22925  | 36.9% | 19.5% | 24.3% | 26.9% |
| S100A10   | 6281   | 39.2% | 19.8% | 21.8% | 26.9% |
| RAG2      | 5897   | 32.4% | 25.0% | 23.4% | 26.9% |
| MGC17337  | 91283  | 26.0% | 27.4% | 27.4% | 26.9% |
| FLJ14503  | 256714 | 24.6% | 26.4% | 29.7% | 26.9% |
| GPT       | 2875   | 30.5% | 26.9% | 23.4% | 26.9% |
| EPHB1     | 2047   | 26.9% | 25.8% | 28.1% | 26.9% |
| ZNF177    | 7730   | 23.1% | 26.6% | 31.0% | 26.9% |
| FLJ31164  | 203062 | 22.5% | 23.6% | 34.8% | 26.9% |
| CD97      | 976    | 25.0% | 29.8% | 26.0% | 26.9% |
| CASQ2     | 845    | 36.7% | 17.4% | 26.8% | 26.9% |
| GYPA      | 2993   | 27.6% | 25.2% | 27.9% | 26.9% |
| MAP3K7IP1 | 10454  | 26.5% | 29.7% | 24.6% | 26.9% |
| NDUF51    | 4719   | 33.2% | 23.3% | 24.3% | 26.9% |
| IL1B      | 3553   | 33.5% | 24.6% | 22.7% | 26.9% |
| AQP12     | 375318 | 29.2% | 23.2% | 28.4% | 26.9% |
| SGK2      | 10110  | 26.0% | 24.3% | 30.5% | 26.9% |
| ZNF624    | 57547  | 34.1% | 30.4% | 16.3% | 26.9% |
| MSX1      | 4487   | 29.8% | 24.7% | 26.3% | 26.9% |
| SSTK-IP   | 128229 | 23.6% | 21.7% | 35.6% | 26.9% |
| D15WSU75E | 27351  | 34.4% | 17.7% | 28.7% | 26.9% |
| SYPL1     | 6856   | 33.9% | 23.2% | 23.7% | 26.9% |
| HTN3      | 3347   | 35.1% | 19.5% | 26.2% | 26.9% |
| FLJ21901  | 79675  | 23.1% | 25.6% | 32.1% | 26.9% |
| C20ORF45  | 51012  | 28.0% | 28.6% | 24.3% | 26.9% |
| KCNAB3    | 9196   | 32.4% | 20.0% | 28.5% | 26.9% |
| VXC-C     | 425054 | 33.3% | 27.0% | 20.5% | 26.9% |
| RGS13     | 6003   | 37.7% | 18.8% | 24.3% | 26.9% |
| MDH1B     | 130752 | 27.2% | 28.6% | 25.1% | 26.9% |
| C20orf117 | 140710 | 36.4% | 20.4% | 24.1% | 26.9% |
| SLC35F4   | 341880 | 34.5% | 25.1% | 21.3% | 26.9% |
| NALP4     | 147945 | 16.7% | 31.6% | 32.5% | 26.9% |
| FLJ25102  | 348738 | 26.1% | 25.7% | 29.1% | 26.9% |
| AEGP      | 158056 | 23.8% | 29.2% | 27.8% | 27.0% |
| AIP       | 9049   | 19.0% | 30.5% | 31.3% | 27.0% |
| OR10A7    | 121364 | 32.1% | 27.0% | 21.7% | 27.0% |
| ACTR5     | 79913  | 36.7% | 27.4% | 16.7% | 27.0% |
| DT1P1A10  | 90121  | 30.7% | 12.6% | 37.6% | 27.0% |
| FUT9      | 10690  | 23.8% | 21.1% | 35.9% | 27.0% |
| SPACA5B   | 729201 | 30.1% | 19.8% | 31.0% | 27.0% |
| RNF121    | 55298  | 30.1% | 19.0% | 31.7% | 27.0% |
| PTPN4     | 5775   | 31.4% | 31.8% | 17.6% | 27.0% |
| RPP21     | 79897  | 28.7% | 36.0% | 16.2% | 27.0% |
| FOLH1     | 2346   | 40.3% | 14.5% | 26.1% | 27.0% |
| LAIR2     | 3904   | 33.7% | 19.4% | 27.8% | 27.0% |
| RUTBC3    | 27352  | 27.7% | 21.7% | 31.4% | 27.0% |
| KCNIP1    | 30820  | 31.9% | 27.4% | 21.7% | 27.0% |
| FLJ23861  | 151050 | 33.4% | 30.2% | 17.3% | 27.0% |
| DDX46     | 9879   | 37.2% | 16.7% | 27.0% | 27.0% |
| ZC3H3     | 23144  | 28.2% | 32.5% | 20.1% | 27.0% |
| HIAN7     | 168537 | 19.3% | 20.0% | 41.6% | 27.0% |
| CDC34     | 997    | 30.2% | 21.3% | 29.4% | 27.0% |
| LTBP1     | 4052   | 33.3% | 28.0% | 19.6% | 27.0% |
| LOC390243 | 390243 | 37.0% | 14.8% | 29.2% | 27.0% |
| PNKP      | 11284  | 29.0% | 28.6% | 23.3% | 27.0% |
| RTN1      | 6252   | 31.6% | 24.1% | 25.2% | 27.0% |
| LOC340542 | 340542 | 23.5% | 26.0% | 31.5% | 27.0% |
| DDX12     | 440081 | 26.0% | 30.5% | 24.4% | 27.0% |
| SYNJ2     | 8871   | 27.1% | 28.6% | 25.2% | 27.0% |
| GPC2      | 221914 | 21.1% | 30.3% | 29.6% | 27.0% |
| LOC401272 | 9729   | 27.0% | 25.9% | 27.9% | 27.0% |
| LOC441581 | 441581 | 27.2% | 28.0% | 25.7% | 27.0% |
| GBP1      | 2633   | 31.0% | 29.3% | 20.7% | 27.0% |
| MDA5      | 64135  | 34.7% | 21.4% | 24.8% | 27.0% |
| SIRT1     | 23411  | 28.6% | 23.2% | 29.1% | 27.0% |
| VMD2      | 7439   | 21.8% | 13.3% | 45.8% | 27.0% |
| FLJ25416  | 220042 | 27.1% | 27.3% | 26.5% | 27.0% |
| NOS3      | 4846   | 38.3% | 22.2% | 20.5% | 27.0% |
| CABP4     | 57010  | 31.7% | 22.1% | 27.2% | 27.0% |
| FLJ42177  | 401271 | 33.8% | 20.9% | 26.3% | 27.0% |
| BBS7      | 55212  | 35.5% | 25.1% | 20.4% | 27.0% |
| KIAA1576  | 57687  | 33.2% | 23.6% | 24.2% | 27.0% |
| PI3       | 5266   | 36.0% | 20.6% | 24.4% | 27.0% |
| COG6      | 57511  | 35.4% | 16.3% | 29.2% | 27.0% |
| CEAL1     | 56971  | 39.4% | 26.7% | 14.9% | 27.0% |
| RNF5      | 6048   | 23.3% | 20.9% | 36.7% | 27.0% |
| FLJ10404  | 54540  | 28.3% | 19.6% | 33.0% | 27.0% |
| UGCGL2    | 55757  | 23.6% | 33.6% | 23.8% | 27.0% |
| FLJ32332  | 132160 | 28.9% | 35.2% | 16.9% | 27.0% |
| FLJ10204  | 55093  | 22.8% | 27.0% | 31.2% | 27.0% |
| ODZ2      | 57451  | 29.2% | 25.5% | 26.3% | 27.0% |
| ITGA1     | 3672   | 27.9% | 19.8% | 33.2% | 27.0% |

|              |           |       |       |       |       |
|--------------|-----------|-------|-------|-------|-------|
| NHLRC1       | 378884    | 26.7% | 26.6% | 27.7% | 27.0% |
| SBF1         | 6305      | 28.0% | 31.5% | 21.4% | 27.0% |
| EMILIN3      | 90187     | 16.9% | 32.1% | 32.0% | 27.0% |
| LILRB4       | 11006     | 38.7% | 20.8% | 21.6% | 27.0% |
| G3BP         | 10146     | 24.8% | 27.3% | 28.9% | 27.0% |
| DNAJC16      | 23341     | 29.9% | 24.9% | 26.1% | 27.0% |
| AGA          | 175       | 34.3% | 26.1% | 20.6% | 27.0% |
| SLC25A16     | 8034      | 30.6% | 24.0% | 26.5% | 27.0% |
| DHX35        | 60625     | 25.3% | 30.6% | 25.1% | 27.0% |
| MSMB         | 4477      | 35.8% | 25.1% | 20.1% | 27.0% |
| AUH          | 549       | 38.3% | 25.2% | 17.5% | 27.0% |
| EGFL3        | 1953      | 35.6% | 15.0% | 30.5% | 27.0% |
| CD3E         | 916       | 34.6% | 28.6% | 17.8% | 27.0% |
| PTGER4       | 5734      | 35.2% | 23.2% | 22.6% | 27.0% |
| ABCB10       | 23456     | 27.8% | 33.2% | 20.0% | 27.0% |
| CD226        | 10666     | 33.7% | 23.3% | 24.0% | 27.0% |
| DLGAP2       | 9228      | 33.0% | 28.2% | 19.8% | 27.0% |
| SHPRH        | 257218    | 36.6% | 19.8% | 24.7% | 27.0% |
| LOC283377    | 283377    | 29.9% | 20.9% | 30.2% | 27.0% |
| ZNF639       | 51193     | 31.8% | 28.4% | 20.8% | 27.0% |
| HS747E2A     | 25770     | 34.6% | 12.9% | 33.5% | 27.0% |
| FBXO25       | 26260     | 29.9% | 22.3% | 28.9% | 27.0% |
| PMM1         | 5372      | 28.9% | 20.5% | 31.6% | 27.0% |
| NIPSNAP1     | 8508      | 37.4% | 24.6% | 19.1% | 27.0% |
| KLK14        | 43847     | 24.0% | 36.6% | 20.4% | 27.0% |
| FKSG44       | 83786     | 35.5% | 26.5% | 19.1% | 27.0% |
| NBPF10       | 100132406 | 36.0% | 30.6% | 14.5% | 27.0% |
| SLC10A4      | 201780    | 28.1% | 28.2% | 24.8% | 27.0% |
| FGL1         | 2267      | 32.5% | 18.1% | 30.4% | 27.0% |
| ANKRD20A     | 84210     | 25.3% | 23.0% | 32.8% | 27.0% |
| IFNA21       | 3452      | 32.1% | 26.7% | 22.3% | 27.0% |
| MAPKAPK3     | 7867      | 17.9% | 31.5% | 31.7% | 27.0% |
| HSPC135      | 29083     | 35.1% | 19.1% | 26.9% | 27.0% |
| KIAA0265     | 23008     | 16.6% | 29.8% | 34.7% | 27.0% |
| FPR1         | 2357      | 23.0% | 32.7% | 25.4% | 27.0% |
| CASK         | 8573      | 19.7% | 26.9% | 34.5% | 27.0% |
| KRTAP13-2    | 337959    | 29.2% | 30.0% | 21.9% | 27.0% |
| FLJ10980     | 56204     | 29.9% | 21.4% | 29.8% | 27.0% |
| OGFR         | 11054     | 27.3% | 22.4% | 31.4% | 27.0% |
| XPO7         | 23039     | 33.2% | 23.1% | 24.8% | 27.0% |
| tcag7.926    | 402715    | 31.6% | 29.9% | 19.6% | 27.0% |
| CXORF23      | 256643    | 23.7% | 31.5% | 25.9% | 27.0% |
| EHD3         | 30845     | 37.1% | 25.2% | 18.7% | 27.0% |
| CKMT2        | 1160      | 32.9% | 26.0% | 22.2% | 27.0% |
| MSH6         | 2956      | 28.1% | 10.1% | 42.9% | 27.0% |
| OR1S1        | 219959    | 33.3% | 17.6% | 30.1% | 27.0% |
| MMP12        | 4321      | 33.7% | 30.2% | 17.2% | 27.0% |
| CA13         | 377677    | 21.6% | 35.1% | 24.3% | 27.0% |
| HABP2        | 3026      | 31.4% | 25.1% | 24.7% | 27.0% |
| CSF1         | 1435      | 25.1% | 24.6% | 31.4% | 27.0% |
| FLJ10379     | 55133     | 28.8% | 12.7% | 39.7% | 27.0% |
| OMP          | 4975      | 28.2% | 24.0% | 28.8% | 27.0% |
| RAB6A        | 5870      | 34.2% | 18.3% | 28.6% | 27.0% |
| C19orf69     | 100170765 | 33.2% | 25.5% | 22.4% | 27.0% |
| GALNT13      | 114805    | 26.0% | 33.5% | 21.7% | 27.0% |
| FLJ22374     | 84182     | 17.3% | 32.9% | 30.9% | 27.0% |
| SEC13L1      | 6396      | 30.8% | 29.0% | 21.3% | 27.0% |
| PLEKHB2      | 55041     | 27.8% | 27.1% | 26.2% | 27.0% |
| MAP3K7       | 6885      | 35.5% | 21.5% | 24.1% | 27.0% |
| FLJ10748     | 55220     | 25.4% | 21.1% | 34.6% | 27.0% |
| DUSP9        | 1852      | 32.3% | 20.1% | 28.8% | 27.0% |
| KIAA1715     | 80856     | 31.1% | 28.9% | 21.2% | 27.0% |
| AKR1CL2      | 83592     | 38.9% | 20.4% | 21.8% | 27.0% |
| GPR145       | 84539     | 40.2% | 22.8% | 18.2% | 27.0% |
| BMP6         | 654       | 34.4% | 22.9% | 23.9% | 27.0% |
| TRAPPC3      | 27095     | 30.0% | 25.6% | 25.5% | 27.0% |
| LOC201158    | 201158    | 23.4% | 20.7% | 37.0% | 27.0% |
| KIAA1912     | 114800    | 30.0% | 16.0% | 35.1% | 27.0% |
| P2RY6        | 5031      | 26.7% | 33.8% | 20.6% | 27.0% |
| CRHBP        | 1393      | 26.9% | 26.4% | 27.9% | 27.0% |
| OR52K2       | 119774    | 26.3% | 20.9% | 33.9% | 27.0% |
| D1S155E      | 7812      | 21.2% | 21.7% | 38.2% | 27.0% |
| C8orf58      | 541565    | 41.2% | 19.0% | 21.0% | 27.0% |
| MGC13096     | 84306     | 18.7% | 29.1% | 33.3% | 27.0% |
| COL3A1       | 1281      | 25.0% | 18.8% | 37.4% | 27.1% |
| ISYNA1       | 51477     | 26.0% | 18.4% | 36.8% | 27.1% |
| SLC1A2       | 6506      | 31.1% | 19.0% | 31.0% | 27.1% |
| KIAA0274     | 9896      | 39.5% | 17.4% | 24.3% | 27.1% |
| TCN2         | 6948      | 28.8% | 20.7% | 31.7% | 27.1% |
| FLJ35827     | 256364    | 26.1% | 23.8% | 31.3% | 27.1% |
| P2RX1        | 5023      | 30.0% | 25.4% | 25.8% | 27.1% |
| MTERF        | 7978      | 30.6% | 24.8% | 25.7% | 27.1% |
| ANAPC13      | 25847     | 35.4% | 21.2% | 24.5% | 27.1% |
| MICB         | 4277      | 29.6% | 29.2% | 22.4% | 27.1% |
| PKHD1        | 5314      | 22.5% | 24.3% | 34.4% | 27.1% |
| PRODH        | 5625      | 30.8% | 30.4% | 20.0% | 27.1% |
| ZNF521       | 25925     | 31.9% | 26.3% | 23.0% | 27.1% |
| OR5M1        | 390168    | 43.1% | 19.7% | 18.4% | 27.1% |
| GRM3         | 2913      | 25.5% | 32.4% | 23.2% | 27.1% |
| DKFZP56C0424 | 26099     | 28.5% | 22.2% | 30.5% | 27.1% |
| VAMP3        | 9341      | 45.5% | 25.2% | 10.5% | 27.1% |
| MRPS9        | 64965     | 18.3% | 32.3% | 30.6% | 27.1% |
| S100A15      | 338324    | 29.5% | 20.9% | 30.7% | 27.1% |
| COMP         | 1311      | 30.2% | 18.7% | 32.4% | 27.1% |
| TMED9        | 54732     | 28.3% | 19.2% | 33.7% | 27.1% |
| PAXIP1L      | 22976     | 27.4% | 18.5% | 35.3% | 27.1% |
| OR4P4        | 81300     | 36.2% | 30.7% | 14.3% | 27.1% |
| SS18L2       | 51188     | 27.3% | 23.5% | 30.4% | 27.1% |

|           |           |       |       |       |       |
|-----------|-----------|-------|-------|-------|-------|
| RPL32     | 6161      | 31.0% | 19.7% | 30.5% | 27.1% |
| DMGDH     | 29958     | 36.8% | 16.0% | 28.5% | 27.1% |
| MGC3196   | 79064     | 44.4% | 14.6% | 22.2% | 27.1% |
| GPR24     | 2847      | 35.0% | 19.6% | 26.6% | 27.1% |
| OVCH1     | 341350    | 25.5% | 29.2% | 26.5% | 27.1% |
| ATRN      | 8455      | 37.9% | 28.1% | 15.2% | 27.1% |
| NASP      | 4678      | 34.6% | 25.6% | 21.0% | 27.1% |
| PRKAB1    | 5564      | 25.1% | 36.1% | 20.1% | 27.1% |
| C6ORF79   | 63933     | 26.9% | 21.5% | 32.9% | 27.1% |
| FLT3      | 2322      | 24.8% | 22.6% | 33.9% | 27.1% |
| MGC46534  | 127002    | 19.6% | 35.3% | 26.4% | 27.1% |
| LOC196394 | 196394    | 25.0% | 20.7% | 35.6% | 27.1% |
| MRPS14    | 63931     | 35.6% | 17.1% | 28.5% | 27.1% |
| SPC24     | 147841    | 32.1% | 19.7% | 29.5% | 27.1% |
| ARHGFE10  | 9639      | 20.5% | 27.8% | 33.0% | 27.1% |
| DSCR2     | 8624      | 33.5% | 16.5% | 31.3% | 27.1% |
| JM1       | 28952     | 26.0% | 18.3% | 37.0% | 27.1% |
| ASTN2     | 23245     | 38.1% | 25.1% | 18.0% | 27.1% |
| SLC35F1   | 222553    | 23.3% | 24.6% | 33.5% | 27.1% |
| NK4       | 9235      | 21.0% | 27.6% | 32.7% | 27.1% |
| OR8D1     | 283159    | 27.6% | 28.9% | 24.8% | 27.1% |
| NXN       | 64359     | 36.2% | 14.4% | 30.7% | 27.1% |
| MGC40499  | 245812    | 31.7% | 25.2% | 24.3% | 27.1% |
| IL1R1     | 3554      | 32.5% | 21.2% | 27.5% | 27.1% |
| HLA-DRA   | 3122      | 28.1% | 24.8% | 28.4% | 27.1% |
| KIAA1161  | 57462     | 33.1% | 20.6% | 27.6% | 27.1% |
| UPLP      | 100134938 | 41.3% | 25.9% | 14.1% | 27.1% |
| UST       | 10090     | 34.5% | 23.6% | 23.2% | 27.1% |
| FLJ30655  | 132320    | 28.7% | 16.0% | 36.6% | 27.1% |
| IL1F8     | 27177     | 42.0% | 15.6% | 23.8% | 27.1% |
| SIAT7D    | 27090     | 34.0% | 24.8% | 22.5% | 27.1% |
| ATP6VOA1  | 535       | 26.1% | 38.0% | 17.2% | 27.1% |
| TEX261    | 113419    | 29.0% | 23.6% | 28.7% | 27.1% |
| C10ORF125 | 282969    | 31.6% | 22.3% | 27.4% | 27.1% |
| LOC375133 | 375133    | 32.8% | 22.7% | 25.8% | 27.1% |
| RNF31     | 55072     | 27.1% | 20.9% | 33.3% | 27.1% |
| RPUSD4    | 84881     | 35.9% | 27.0% | 18.4% | 27.1% |
| BSCL2     | 26580     | 37.6% | 20.1% | 23.6% | 27.1% |
| TMPPRS12  | 283471    | 35.0% | 21.4% | 24.9% | 27.1% |
| NAP1L5    | 266812    | 41.2% | 24.0% | 16.2% | 27.1% |
| NARFL     | 64428     | 31.1% | 24.2% | 26.0% | 27.1% |
| S100A13   | 6284      | 24.2% | 22.0% | 35.2% | 27.1% |
| TNN       | 63923     | 17.2% | 30.5% | 33.6% | 27.1% |
| PEX11B    | 8799      | 40.5% | 24.9% | 16.0% | 27.1% |
| ATP9B     | 374868    | 35.3% | 15.8% | 30.3% | 27.1% |
| PTK6      | 5753      | 28.9% | 19.3% | 33.2% | 27.1% |
| OR6K6     | 128371    | 31.5% | 29.8% | 20.1% | 27.1% |
| GARP      | 2615      | 24.9% | 23.7% | 32.8% | 27.1% |
| HEBP2     | 23593     | 32.6% | 28.5% | 20.3% | 27.1% |
| CDC14A    | 8556      | 35.3% | 26.9% | 19.2% | 27.1% |
| C10ORF97  | 80013     | 22.7% | 37.5% | 21.2% | 27.1% |
| KLHL3     | 26249     | 22.1% | 26.6% | 32.7% | 27.1% |
| COG8      | 84342     | 28.8% | 23.6% | 29.0% | 27.1% |
| POLR1D    | 51082     | 36.5% | 25.4% | 19.5% | 27.1% |
| EBP       | 10682     | 27.4% | 29.0% | 24.9% | 27.1% |
| ZNF650    | 130507    | 23.0% | 36.5% | 21.9% | 27.1% |
| WNT7A     | 7476      | 26.9% | 24.2% | 30.3% | 27.1% |
| PCTK3     | 5129      | 26.7% | 25.1% | 29.6% | 27.1% |
| CYP4V2    | 285440    | 25.4% | 35.3% | 20.7% | 27.1% |
| ARL2BP    | 23568     | 31.3% | 30.3% | 19.7% | 27.1% |
| LOC148823 | 148823    | 33.2% | 19.0% | 29.2% | 27.1% |
| RHOB      | 388       | 29.6% | 22.5% | 29.3% | 27.1% |
| EPHA6     | 285220    | 22.3% | 38.3% | 20.8% | 27.1% |
| TMEM28    | 27112     | 38.1% | 16.7% | 26.6% | 27.1% |
| MEGF11    | 84465     | 36.2% | 23.7% | 21.5% | 27.1% |
| ARPM2     | 140625    | 27.8% | 17.7% | 35.9% | 27.1% |
| GR6       | 23434     | 20.4% | 25.6% | 35.4% | 27.1% |
| COL14A1   | 7373      | 28.9% | 27.9% | 24.6% | 27.1% |
| MAN2B1    | 4125      | 27.9% | 24.4% | 29.1% | 27.1% |
| TFRC      | 7037      | 37.0% | 28.4% | 16.1% | 27.1% |
| TYSD1     | 219743    | 32.0% | 28.3% | 21.1% | 27.1% |
| CA9       | 768       | 28.5% | 23.4% | 29.6% | 27.1% |
| OR9G9     | 504191    | 22.0% | 24.1% | 35.4% | 27.1% |
| DNAJC10   | 54431     | 29.6% | 30.1% | 21.7% | 27.1% |
| GP5       | 2814      | 31.6% | 20.0% | 29.8% | 27.1% |
| MGC35206  | 339669    | 27.9% | 17.9% | 35.6% | 27.1% |
| OXER1     | 165140    | 29.7% | 23.0% | 28.8% | 27.1% |
| ARHGDI8   | 397       | 38.0% | 18.0% | 25.5% | 27.1% |
| ORSJ2     | 282775    | 40.0% | 16.7% | 24.8% | 27.1% |
| ADCK2     | 90956     | 20.4% | 30.6% | 30.5% | 27.1% |
| WIRE      | 147179    | 29.4% | 15.9% | 36.1% | 27.1% |
| DRD1IP    | 50632     | 28.0% | 23.5% | 29.9% | 27.2% |
| MAB2L1L1  | 4081      | 25.0% | 32.6% | 23.9% | 27.2% |
| BCL9L     | 283149    | 34.2% | 22.0% | 25.3% | 27.2% |
| PPARGC1B  | 133522    | 38.5% | 11.0% | 32.0% | 27.2% |
| SOX6      | 55553     | 24.0% | 28.4% | 29.0% | 27.2% |
| GLI       | 2735      | 35.9% | 25.9% | 19.6% | 27.2% |
| MGC7036   | 196383    | 15.9% | 31.3% | 34.2% | 27.2% |
| KIAA0284  | 283638    | 25.3% | 31.3% | 24.9% | 27.2% |
| MGC5601   | 80724     | 36.0% | 22.7% | 22.8% | 27.2% |
| FXYD1     | 5348      | 32.6% | 23.3% | 25.6% | 27.2% |
| CYYR1     | 116159    | 21.0% | 20.2% | 40.3% | 27.2% |
| GAGEB1    | 8712      | 22.3% | 23.2% | 36.1% | 27.2% |
| FLJ11046  | 55773     | 14.6% | 27.4% | 39.5% | 27.2% |
| VAPB      | 9217      | 35.0% | 18.7% | 27.8% | 27.2% |
| TNIK      | 23043     | 27.4% | 28.3% | 25.8% | 27.2% |
| KIF13B    | 23303     | 33.3% | 20.9% | 27.2% | 27.2% |
| MRPL48    | 51642     | 40.0% | 24.8% | 16.7% | 27.2% |



|               |           |       |       |       |       |
|---------------|-----------|-------|-------|-------|-------|
| FLJ14299      | 80139     | 22.8% | 29.2% | 29.5% | 27.2% |
| PRKDC         | 5591      | 34.3% | 30.6% | 16.6% | 27.2% |
| FLJ12666      | 79647     | 35.4% | 23.7% | 22.4% | 27.2% |
| SKIL          | 6498      | 35.2% | 16.1% | 30.2% | 27.2% |
| RASSF2        | 9770      | 30.9% | 24.4% | 26.3% | 27.2% |
| CLCN5         | 1184      | 25.5% | 22.1% | 33.9% | 27.2% |
| ZNF443        | 10224     | 39.1% | 25.5% | 16.9% | 27.2% |
| GTPBP2        | 54676     | 33.1% | 29.7% | 18.8% | 27.2% |
| C20ORF174     | 128611    | 37.0% | 26.2% | 18.4% | 27.2% |
| ATE1          | 11101     | 30.5% | 30.8% | 20.2% | 27.2% |
| MRPL33        | 9553      | 38.1% | 24.7% | 18.8% | 27.2% |
| ELF3          | 1999      | 39.1% | 23.5% | 18.9% | 27.2% |
| METAP1        | 23173     | 29.9% | 27.4% | 24.3% | 27.2% |
| SEM2          | 6407      | 33.6% | 23.2% | 24.7% | 27.2% |
| SEZ6          | 124925    | 32.0% | 21.2% | 28.3% | 27.2% |
| SCML2         | 10389     | 34.7% | 16.8% | 30.0% | 27.2% |
| MPHOSPH9      | 10198     | 42.0% | 23.1% | 16.4% | 27.2% |
| DKFZP667G2110 | 131544    | 28.9% | 25.5% | 27.1% | 27.2% |
| HDAC5         | 10014     | 38.3% | 20.6% | 22.7% | 27.2% |
| CHRD12        | 25884     | 30.5% | 24.0% | 27.1% | 27.2% |
| CGI-07        | 51068     | 24.8% | 23.6% | 33.2% | 27.2% |
| AE2           | 84224     | 22.4% | 32.1% | 27.0% | 27.2% |
| MGC33951      | 145645    | 22.3% | 17.5% | 41.7% | 27.2% |
| ARHGAP26      | 23092     | 32.0% | 17.9% | 31.7% | 27.2% |
| FLJ39575      | 286006    | 32.1% | 25.1% | 24.3% | 27.2% |
| FALZ          | 2186      | 38.1% | 19.0% | 24.5% | 27.2% |
| GRWD1         | 83743     | 31.1% | 23.6% | 26.8% | 27.2% |
| TUBGCP3       | 10426     | 30.6% | 23.6% | 27.3% | 27.2% |
| USP46         | 64854     | 26.0% | 21.0% | 34.6% | 27.2% |
| RPP38         | 10557     | 30.7% | 27.3% | 23.6% | 27.2% |
| POFUT2        | 23275     | 28.4% | 20.3% | 32.8% | 27.2% |
| LRP3          | 4037      | 36.3% | 17.4% | 27.9% | 27.2% |
| GEM           | 2669      | 32.9% | 23.1% | 25.5% | 27.2% |
| GLO1          | 2739      | 36.8% | 19.4% | 25.4% | 27.2% |
| MKNK1         | 8569      | 36.4% | 18.2% | 27.0% | 27.2% |
| TPX2          | 22974     | 42.9% | 18.8% | 20.0% | 27.2% |
| TMED7         | 51014     | 23.6% | 26.6% | 31.4% | 27.2% |
| PF6           | 200162    | 22.6% | 28.3% | 30.8% | 27.2% |
| LYZ14         | 131375    | 38.1% | 19.7% | 23.8% | 27.2% |
| C14ORF73      | 91828     | 37.0% | 20.8% | 23.8% | 27.2% |
| CD2AP         | 23607     | 27.7% | 31.6% | 22.3% | 27.2% |
| VPS52         | 6293      | 35.2% | 25.6% | 20.8% | 27.2% |
| SMAD2         | 4087      | 32.9% | 25.9% | 22.8% | 27.2% |
| MRLC2         | 103910    | 27.8% | 26.5% | 27.3% | 27.2% |
| EPB41L2       | 2037      | 41.3% | 15.5% | 24.7% | 27.2% |
| BTN3A2        | 11118     | 28.0% | 26.5% | 27.1% | 27.2% |
| ADRM1         | 11047     | 33.7% | 18.6% | 29.3% | 27.2% |
| HIVEP2        | 3097      | 36.1% | 23.2% | 22.3% | 27.2% |
| DGCR2         | 9993      | 33.5% | 22.3% | 25.8% | 27.2% |
| RAB24         | 53917     | 26.4% | 29.3% | 25.9% | 27.2% |
| PRKCC         | 5588      | 19.6% | 34.4% | 27.7% | 27.2% |
| GOLGA4        | 2803      | 37.0% | 15.0% | 29.7% | 27.2% |
| HIPK2         | 28996     | 25.3% | 37.1% | 19.2% | 27.2% |
| MGC10854      | 84260     | 37.5% | 15.1% | 29.1% | 27.2% |
| NICAL         | 64780     | 24.5% | 21.5% | 35.7% | 27.2% |
| SENP5         | 205564    | 33.8% | 32.2% | 15.7% | 27.2% |
| CYLC2         | 1539      | 29.9% | 27.8% | 23.9% | 27.2% |
| TBR1          | 10716     | 26.0% | 24.8% | 30.9% | 27.2% |
| TRIM38        | 10475     | 31.9% | 25.5% | 24.3% | 27.2% |
| DUT           | 1854      | 24.3% | 21.4% | 36.0% | 27.2% |
| NUDT2         | 318       | 33.3% | 27.7% | 20.7% | 27.2% |
| CNOT4         | 4850      | 29.2% | 25.0% | 27.5% | 27.2% |
| ABR           | 29        | 29.8% | 22.1% | 29.8% | 27.2% |
| TAGLN         | 6876      | 44.3% | 15.8% | 21.6% | 27.2% |
| FLJ16636      | 158431    | 24.2% | 23.6% | 33.9% | 27.2% |
| GDPD2         | 54857     | 41.7% | 16.8% | 23.2% | 27.2% |
| TLE4          | 7091      | 44.5% | 17.3% | 19.9% | 27.2% |
| NUP85         | 79902     | 30.6% | 23.4% | 27.7% | 27.2% |
| ANXA5         | 308       | 30.8% | 24.5% | 26.4% | 27.2% |
| ATP4A         | 495       | 24.4% | 25.8% | 31.5% | 27.2% |
| FLJ20457      | 54942     | 28.4% | 21.5% | 31.8% | 27.2% |
| ZNF266        | 10781     | 34.2% | 28.2% | 19.3% | 27.2% |
| TIZ           | 171392    | 17.7% | 31.2% | 32.9% | 27.2% |
| FGF17         | 8822      | 35.4% | 24.4% | 22.0% | 27.2% |
| CCDC152       | 100129792 | 36.4% | 23.9% | 21.4% | 27.2% |
| ABCC8         | 6833      | 28.7% | 25.3% | 27.7% | 27.2% |
| ZNF568        | 374900    | 37.9% | 19.9% | 23.9% | 27.2% |
| CALCB         | 797       | 35.7% | 22.8% | 23.3% | 27.2% |
| FBF1          | 85302     | 31.9% | 26.1% | 23.7% | 27.2% |
| SELE          | 6401      | 20.8% | 30.5% | 30.4% | 27.2% |
| CTNNA2        | 1496      | 37.0% | 14.5% | 30.2% | 27.2% |
| GTF3C1        | 2975      | 33.1% | 27.6% | 21.1% | 27.2% |
| DDX27         | 55661     | 26.0% | 29.5% | 26.3% | 27.2% |
| FLJ39743      | 283777    | 37.6% | 22.1% | 22.0% | 27.3% |
| RDS           | 5961      | 37.6% | 15.3% | 28.9% | 27.3% |
| C9ORF7        | 11094     | 31.8% | 19.0% | 30.9% | 27.3% |
| SEPW1         | 6415      | 38.9% | 19.5% | 23.4% | 27.3% |
| PKD2          | 5311      | 35.1% | 16.3% | 30.4% | 27.3% |
| PCDHGB2       | 56103     | 36.8% | 30.6% | 14.4% | 27.3% |
| GTF2F1        | 2962      | 38.3% | 20.3% | 23.2% | 27.3% |
| LOC647060     | 647060    | 26.7% | 17.2% | 37.9% | 27.3% |
| NUFIP1        | 26747     | 24.0% | 24.6% | 33.2% | 27.3% |
| RNF20         | 56254     | 38.0% | 18.8% | 25.0% | 27.3% |
| FMR1          | 2332      | 35.6% | 30.1% | 16.1% | 27.3% |
| C18ORF24      | 220134    | 19.2% | 30.6% | 32.0% | 27.3% |
| CAST          | 831       | 33.1% | 29.8% | 18.9% | 27.3% |
| KIAA1618      | 57714     | 26.0% | 19.3% | 36.5% | 27.3% |
| CAMP          | 820       | 27.5% | 23.1% | 31.2% | 27.3% |

|           |        |       |       |       |       |
|-----------|--------|-------|-------|-------|-------|
| CLOCK     | 9575   | 28.7% | 16.1% | 37.0% | 27.3% |
| TTC21A    | 199223 | 27.7% | 28.6% | 25.5% | 27.3% |
| FLJ23878  | 200172 | 22.0% | 29.4% | 30.3% | 27.3% |
| POLD4     | 57804  | 38.5% | 21.0% | 22.4% | 27.3% |
| OR4C46    | 119749 | 38.2% | 20.9% | 22.7% | 27.3% |
| KCNA10    | 3744   | 30.9% | 19.1% | 31.8% | 27.3% |
| FLJ37183  | 219293 | 19.8% | 22.0% | 40.0% | 27.3% |
| TSPAN9    | 10867  | 24.4% | 34.3% | 23.2% | 27.3% |
| PAH       | 5053   | 28.3% | 17.3% | 36.2% | 27.3% |
| NDUF54    | 4724   | 23.7% | 25.8% | 32.3% | 27.3% |
| FLJ23033  | 79739  | 22.3% | 24.0% | 35.5% | 27.3% |
| DEPC-1    | 221120 | 29.5% | 29.0% | 23.2% | 27.3% |
| C6ORF206  | 221421 | 27.2% | 30.9% | 23.7% | 27.3% |
| TRDN      | 10345  | 33.7% | 26.2% | 21.9% | 27.3% |
| P2RY13    | 53829  | 26.1% | 28.5% | 27.2% | 27.3% |
| OR10A3    | 26496  | 35.5% | 26.5% | 19.9% | 27.3% |
| TGFB111   | 7041   | 27.9% | 14.9% | 39.1% | 27.3% |
| RNF26     | 79102  | 27.2% | 22.5% | 32.1% | 27.3% |
| ZDHH23    | 254887 | 35.7% | 22.3% | 23.9% | 27.3% |
| IFITM3    | 10410  | 31.4% | 23.0% | 27.4% | 27.3% |
| ATP9A     | 10079  | 38.7% | 17.2% | 26.0% | 27.3% |
| CDX4      | 1046   | 34.4% | 26.6% | 20.8% | 27.3% |
| OSBPL7    | 114881 | 32.8% | 21.0% | 28.1% | 27.3% |
| CHRN82    | 1141   | 25.6% | 27.5% | 28.7% | 27.3% |
| LENG5     | 79042  | 29.5% | 25.3% | 27.1% | 27.3% |
| JMY       | 133746 | 34.7% | 26.8% | 20.4% | 27.3% |
| LIMS1     | 3987   | 24.5% | 22.6% | 34.8% | 27.3% |
| NOV       | 4856   | 36.8% | 27.9% | 17.1% | 27.3% |
| THAP8     | 199745 | 36.4% | 17.6% | 27.9% | 27.3% |
| FAM29A    | 54801  | 27.8% | 34.9% | 19.1% | 27.3% |
| KRTAP4-4  | 84616  | 21.3% | 32.5% | 28.1% | 27.3% |
| SLC06A1   | 133482 | 24.7% | 28.9% | 28.3% | 27.3% |
| CCBL1     | 883    | 35.6% | 14.7% | 31.6% | 27.3% |
| WFDC12    | 128488 | 30.8% | 27.4% | 23.6% | 27.3% |
| ARL2      | 402    | 31.8% | 23.0% | 27.0% | 27.3% |
| GRK1      | 6011   | 23.0% | 23.0% | 35.9% | 27.3% |
| ABC5      | 340273 | 45.4% | 22.3% | 14.2% | 27.3% |
| UGT1A1    | 54658  | 42.7% | 19.9% | 19.2% | 27.3% |
| SLC5A2    | 6524   | 31.8% | 25.3% | 24.8% | 27.3% |
| TREM12    | 79865  | 36.7% | 24.0% | 21.2% | 27.3% |
| TLN1      | 7094   | 36.1% | 26.8% | 19.0% | 27.3% |
| MRPL27    | 51264  | 36.1% | 24.4% | 21.4% | 27.3% |
| C6ORF72   | 116254 | 34.9% | 27.6% | 19.4% | 27.3% |
| KLIP1     | 79682  | 23.4% | 20.3% | 38.2% | 27.3% |
| FLJ20509  | 54956  | 35.3% | 20.1% | 26.5% | 27.3% |
| TTC6      | 115669 | 29.9% | 22.9% | 29.1% | 27.3% |
| ZNF696    | 79943  | 32.6% | 23.5% | 25.8% | 27.3% |
| SNX1      | 6642   | 37.3% | 19.4% | 25.3% | 27.3% |
| SGOL2     | 151246 | 33.6% | 22.8% | 25.5% | 27.3% |
| FLJ45803  | 399948 | 28.8% | 20.4% | 32.7% | 27.3% |
| ZNF462    | 58499  | 26.2% | 25.5% | 30.2% | 27.3% |
| COBRA1    | 25920  | 20.2% | 27.9% | 33.8% | 27.3% |
| C9ORF41   | 138199 | 12.7% | 31.4% | 37.8% | 27.3% |
| SLC16A14  | 151473 | 24.0% | 20.2% | 37.7% | 27.3% |
| B3GAT1    | 27087  | 26.1% | 28.4% | 27.5% | 27.3% |
| LETM1     | 3954   | 40.6% | 22.8% | 18.5% | 27.3% |
| TFR2      | 7036   | 31.4% | 28.7% | 21.9% | 27.3% |
| PTPN22    | 26191  | 28.8% | 29.8% | 23.4% | 27.3% |
| RUNX1     | 861    | 30.7% | 24.6% | 26.7% | 27.3% |
| CGI-90    | 51115  | 16.4% | 27.3% | 38.3% | 27.3% |
| LOC123722 | 123722 | 22.1% | 24.4% | 35.4% | 27.3% |
| SLC35D3   | 340146 | 33.2% | 20.9% | 27.9% | 27.3% |
| MGC10198  | 201965 | 27.1% | 25.8% | 29.1% | 27.3% |
| TIMP2     | 7077   | 22.4% | 31.5% | 28.1% | 27.3% |
| COX4I1    | 1327   | 36.3% | 26.2% | 19.4% | 27.3% |
| THUMP1    | 55623  | 26.3% | 30.2% | 25.5% | 27.3% |
| MOV10     | 4343   | 32.0% | 27.5% | 22.5% | 27.3% |
| FAM26C    | 255022 | 41.2% | 25.8% | 14.9% | 27.3% |
| FLJ25791  | 222521 | 24.4% | 27.3% | 30.3% | 27.3% |
| TCF23     | 150921 | 28.6% | 26.7% | 26.8% | 27.3% |
| ART1      | 417    | 28.1% | 22.5% | 31.4% | 27.3% |
| HBM       | 3042   | 30.1% | 18.2% | 33.7% | 27.3% |
| LRP2BP    | 353322 | 35.6% | 18.4% | 28.0% | 27.3% |
| LOC133308 | 133308 | 31.7% | 22.3% | 28.1% | 27.3% |
| PLEKHG1   | 57480  | 35.7% | 10.6% | 35.7% | 27.3% |
| BCORL1    | 63035  | 25.7% | 31.3% | 25.0% | 27.3% |
| OXCT2     | 64064  | 31.9% | 28.6% | 21.5% | 27.3% |
| CNTN3     | 5067   | 30.5% | 25.9% | 25.7% | 27.3% |
| OR10I1    | 26476  | 33.8% | 23.3% | 24.9% | 27.3% |
| ANGPT4    | 51378  | 33.3% | 23.9% | 24.8% | 27.3% |
| PFDN2     | 5202   | 24.1% | 28.8% | 29.1% | 27.3% |
| MID1      | 4281   | 32.3% | 27.4% | 22.3% | 27.3% |
| SLC18A3   | 6572   | 44.9% | 17.5% | 19.6% | 27.3% |
| SLC25A28  | 81894  | 37.2% | 21.2% | 23.6% | 27.3% |
| SERPINB1  | 1992   | 34.1% | 23.0% | 25.0% | 27.3% |
| DAPK1     | 1612   | 25.9% | 33.0% | 23.2% | 27.3% |
| FRG2      | 448831 | 25.7% | 25.4% | 30.9% | 27.3% |
| SSH2      | 85464  | 22.7% | 32.1% | 27.2% | 27.4% |
| ROR2      | 4920   | 23.2% | 24.7% | 34.2% | 27.4% |
| CCL24     | 6369   | 42.4% | 27.5% | 12.2% | 27.4% |
| TMP21     | 10972  | 33.3% | 20.8% | 27.9% | 27.4% |
| SIX6      | 4990   | 26.8% | 32.6% | 22.7% | 27.4% |
| ORM2      | 5005   | 29.8% | 20.3% | 32.0% | 27.4% |
| TRIM61    | 391712 | 20.8% | 31.1% | 30.2% | 27.4% |
| SLC2A3    | 6515   | 34.4% | 23.9% | 23.8% | 27.4% |
| Sep-03    | 55964  | 31.7% | 20.4% | 30.0% | 27.4% |
| FLJ31952  | 146857 | 30.5% | 27.2% | 24.4% | 27.4% |
| LOC728269 | 728269 | 34.0% | 26.1% | 22.0% | 27.4% |

|               |        |       |       |       |       |
|---------------|--------|-------|-------|-------|-------|
| CSRP1         | 1465   | 32.9% | 19.9% | 29.3% | 27.4% |
| USP30         | 84749  | 33.5% | 19.2% | 29.4% | 27.4% |
| C7ORF25       | 79020  | 39.2% | 28.6% | 14.4% | 27.4% |
| SLC30A3       | 7781   | 50.5% | 16.5% | 15.1% | 27.4% |
| PGRMC2        | 10424  | 23.5% | 24.1% | 34.5% | 27.4% |
| CREBL2        | 1389   | 41.2% | 15.7% | 25.2% | 27.4% |
| ARID1B        | 57492  | 27.2% | 33.7% | 21.2% | 27.4% |
| RUTBC1        | 9905   | 25.0% | 33.3% | 23.8% | 27.4% |
| RNUXA         | 51808  | 19.9% | 33.7% | 28.6% | 27.4% |
| CST9L         | 128821 | 31.8% | 27.7% | 22.6% | 27.4% |
| WDR67         | 93594  | 13.2% | 30.7% | 38.3% | 27.4% |
| NR4A2         | 4929   | 28.7% | 27.3% | 26.1% | 27.4% |
| FLJ35848      | 284071 | 35.6% | 25.4% | 21.1% | 27.4% |
| CNGB3         | 54714  | 22.9% | 34.6% | 24.6% | 27.4% |
| KIBRA         | 23286  | 31.5% | 25.1% | 25.5% | 27.4% |
| DKFZP564B1023 | 83479  | 30.2% | 27.6% | 24.3% | 27.4% |
| ECOP          | 81552  | 23.7% | 25.6% | 32.8% | 27.4% |
| ADH1B         | 125    | 26.3% | 33.1% | 22.8% | 27.4% |
| FLJ14166      | 79616  | 22.7% | 26.8% | 32.7% | 27.4% |
| MGC45562      | 125113 | 21.9% | 21.7% | 38.5% | 27.4% |
| CD200R2       | 344807 | 35.6% | 25.0% | 21.5% | 27.4% |
| STAT3         | 6774   | 42.2% | 16.7% | 23.3% | 27.4% |
| LOC144363     | 144363 | 20.4% | 17.7% | 44.0% | 27.4% |
| CLUU1         | 574028 | 25.5% | 29.7% | 26.9% | 27.4% |
| RNF208        | 727800 | 39.2% | 17.3% | 25.6% | 27.4% |
| IFNK          | 56832  | 31.0% | 27.8% | 23.3% | 27.4% |
| PNMA5         | 114824 | 30.6% | 30.8% | 20.8% | 27.4% |
| LOC163131     | 163131 | 24.4% | 22.8% | 34.9% | 27.4% |
| YIPF5         | 81555  | 29.9% | 26.3% | 25.9% | 27.4% |
| HIST1H2AC     | 8334   | 47.9% | 12.6% | 21.6% | 27.4% |
| RAB3C         | 115827 | 47.6% | 16.3% | 18.2% | 27.4% |
| ZNF8          | 7554   | 32.6% | 16.7% | 32.9% | 27.4% |
| C19ORF20      | 91978  | 37.2% | 21.5% | 23.4% | 27.4% |
| C9ORF100S     | 158293 | 25.8% | 18.4% | 38.0% | 27.4% |
| CRSP9         | 9443   | 37.1% | 17.2% | 27.9% | 27.4% |
| SAMD4         | 23034  | 17.2% | 26.5% | 38.5% | 27.4% |
| P4HA2         | 8974   | 36.8% | 25.6% | 19.7% | 27.4% |
| TOP2B         | 7155   | 34.1% | 18.6% | 29.5% | 27.4% |
| TRIP15        | 9318   | 29.3% | 26.7% | 26.2% | 27.4% |
| LOC51161      | 51161  | 24.5% | 25.3% | 32.4% | 27.4% |
| BAG5          | 9529   | 33.9% | 16.9% | 31.3% | 27.4% |
| KIF5C         | 3800   | 18.2% | 39.2% | 24.9% | 27.4% |
| PLA2G7        | 7941   | 32.5% | 16.9% | 32.9% | 27.4% |
| OR51S1        | 119692 | 32.4% | 26.4% | 23.4% | 27.4% |
| NRM           | 11270  | 42.5% | 18.3% | 21.3% | 27.4% |
| GGA3          | 23163  | 18.2% | 29.0% | 35.0% | 27.4% |
| ERBB3         | 2065   | 21.5% | 28.8% | 31.8% | 27.4% |
| SENP6         | 26054  | 38.9% | 25.0% | 18.3% | 27.4% |
| H2BFWT        | 158983 | 22.8% | 32.8% | 26.6% | 27.4% |
| SNAPAP        | 23557  | 27.9% | 22.4% | 32.0% | 27.4% |
| C14ORF10      | 55012  | 23.5% | 16.1% | 42.6% | 27.4% |
| LST1          | 7940   | 29.4% | 28.9% | 23.9% | 27.4% |
| PRKR          | 5610   | 23.7% | 27.6% | 30.9% | 27.4% |
| RFP2          | 10206  | 29.4% | 28.6% | 24.3% | 27.4% |
| CASP7         | 840    | 34.4% | 30.3% | 17.5% | 27.4% |
| MKLN1         | 4289   | 38.2% | 25.6% | 18.4% | 27.4% |
| GPR174        | 84636  | 26.5% | 30.8% | 24.9% | 27.4% |
| KRT23         | 25984  | 33.7% | 17.7% | 30.8% | 27.4% |
| GPR171        | 29909  | 32.6% | 22.6% | 27.1% | 27.4% |
| MYEF2         | 50804  | 33.8% | 25.5% | 22.9% | 27.4% |
| SLC7A7        | 9056   | 39.8% | 24.8% | 17.7% | 27.4% |
| ELAVL2        | 1993   | 22.0% | 26.6% | 33.7% | 27.4% |
| ARL11         | 115761 | 28.3% | 17.2% | 36.7% | 27.4% |
| SOX5          | 6660   | 27.3% | 15.8% | 39.2% | 27.4% |
| ZNF213        | 7760   | 30.6% | 25.2% | 26.5% | 27.4% |
| COL13A1       | 1305   | 25.8% | 29.3% | 27.2% | 27.4% |
| KIAA0195      | 9772   | 46.1% | 20.0% | 16.2% | 27.4% |
| EPM2AIP1      | 9852   | 16.9% | 24.5% | 40.9% | 27.4% |
| HNRPH3        | 3189   | 40.7% | 21.1% | 20.4% | 27.4% |
| FLJ26443      | 400165 | 34.7% | 18.6% | 28.9% | 27.4% |
| DKFZP761B1514 | 84248  | 18.6% | 27.1% | 36.6% | 27.4% |
| HMBS          | 3145   | 26.2% | 27.8% | 28.2% | 27.4% |
| C19ORF18      | 147685 | 34.3% | 25.4% | 22.6% | 27.4% |
| LOC390748     | 390748 | 38.6% | 20.5% | 23.2% | 27.4% |
| TSGA13        | 114960 | 30.5% | 27.2% | 24.6% | 27.4% |
| HARS          | 3035   | 37.0% | 23.8% | 21.5% | 27.4% |
| TM4SF2        | 7102   | 27.8% | 25.4% | 29.0% | 27.4% |
| TNNI1         | 7135   | 28.1% | 32.1% | 22.0% | 27.4% |
| MTRR          | 4552   | 30.5% | 24.5% | 27.3% | 27.4% |
| GARNL4        | 23108  | 35.9% | 18.5% | 27.9% | 27.4% |
| THBD          | 7056   | 35.1% | 17.8% | 29.4% | 27.4% |
| TGIF2LX       | 90316  | 36.8% | 17.0% | 28.4% | 27.4% |
| SNX7          | 51375  | 32.5% | 29.4% | 20.4% | 27.4% |
| IFNE1         | 338376 | 37.0% | 20.8% | 24.5% | 27.4% |
| DKFZP762E1312 | 55355  | 33.1% | 27.5% | 21.7% | 27.4% |
| LOC129521     | 129521 | 26.3% | 11.7% | 44.3% | 27.4% |
| LOC387638     | 387638 | 27.2% | 22.3% | 32.8% | 27.4% |
| EPGN          | 255324 | 37.4% | 20.1% | 24.8% | 27.4% |
| PIM2          | 11040  | 35.8% | 14.9% | 31.7% | 27.4% |
| DHCR7         | 1717   | 35.6% | 16.8% | 29.9% | 27.4% |
| ORSL1         | 55278  | 25.6% | 28.9% | 27.8% | 27.4% |
| KIDINS220     | 57498  | 35.3% | 22.6% | 24.3% | 27.4% |
| KIAA1698      | 80789  | 27.0% | 20.8% | 34.6% | 27.4% |
| HIST1H1A      | 3024   | 26.0% | 20.3% | 36.0% | 27.4% |
| LOC440138     | 440138 | 32.8% | 10.2% | 39.3% | 27.4% |
| SLC6A18       | 348932 | 41.7% | 22.8% | 17.8% | 27.4% |
| STRA13        | 201254 | 39.7% | 28.5% | 14.1% | 27.4% |
| PPM1F         | 9647   | 25.4% | 27.9% | 29.0% | 27.4% |

|           |        |       |       |       |       |
|-----------|--------|-------|-------|-------|-------|
| CLIPR-59  | 25999  | 22.0% | 31.3% | 29.0% | 27.4% |
| SPON2     | 10417  | 39.8% | 24.9% | 17.6% | 27.4% |
| MLPH      | 79083  | 17.5% | 31.3% | 33.6% | 27.4% |
| PSEN2     | 5664   | 29.0% | 24.2% | 29.1% | 27.4% |
| HYPK      | 25764  | 35.1% | 16.7% | 30.5% | 27.4% |
| ZNF229    | 7772   | 46.1% | 14.7% | 21.5% | 27.4% |
| HIST1H2AH | 85235  | 34.4% | 19.9% | 28.0% | 27.4% |
| ZNF562    | 54811  | 31.9% | 26.8% | 23.6% | 27.4% |
| KIAA1609  | 57707  | 36.9% | 25.9% | 19.5% | 27.4% |
| BAIAP3    | 8938   | 33.3% | 17.9% | 31.2% | 27.4% |
| SH2BP1    | 9646   | 26.8% | 18.8% | 36.8% | 27.4% |
| KIAA0146  | 23514  | 18.6% | 21.5% | 42.3% | 27.5% |
| RAB9B     | 51209  | 27.4% | 27.0% | 28.0% | 27.5% |
| DHDH      | 27294  | 28.8% | 26.6% | 27.0% | 27.5% |
| SCN11A    | 11280  | 28.2% | 26.6% | 27.6% | 27.5% |
| CLIC3     | 9022   | 32.3% | 22.0% | 28.1% | 27.5% |
| PTCD2     | 79810  | 37.6% | 22.7% | 22.0% | 27.5% |
| OR4F29    | 729759 | 29.2% | 20.0% | 33.1% | 27.5% |
| TULP3     | 7289   | 24.8% | 22.7% | 34.9% | 27.5% |
| STK31     | 56164  | 32.0% | 26.4% | 24.0% | 27.5% |
| C9ORF91   | 203197 | 25.5% | 30.6% | 26.2% | 27.5% |
| IRAK4     | 51135  | 27.0% | 25.9% | 29.4% | 27.5% |
| ADAMTSL3  | 57188  | 31.3% | 32.0% | 19.1% | 27.5% |
| ZNF593    | 51042  | 39.8% | 19.4% | 23.2% | 27.5% |
| RCV1      | 5957   | 31.1% | 22.9% | 28.4% | 27.5% |
| PHF23     | 79142  | 24.4% | 31.0% | 27.0% | 27.5% |
| SLC27A2   | 11001  | 33.5% | 19.3% | 29.6% | 27.5% |
| C10TNF4   | 114900 | 26.6% | 30.6% | 25.2% | 27.5% |
| IL22RA1   | 58985  | 35.3% | 20.7% | 26.4% | 27.5% |
| SART1     | 9092   | 36.0% | 28.8% | 17.5% | 27.5% |
| MARK3     | 4140   | 24.0% | 23.8% | 34.6% | 27.5% |
| RAB40A    | 142684 | 33.9% | 19.4% | 29.1% | 27.5% |
| TSC1      | 7248   | 34.6% | 29.1% | 18.7% | 27.5% |
| DHRS10    | 51171  | 41.3% | 22.9% | 18.2% | 27.5% |
| TMEM14C   | 51522  | 34.2% | 30.0% | 18.1% | 27.5% |
| BDG29     | 23174  | 23.4% | 15.5% | 43.6% | 27.5% |
| KRT6A     | 3853   | 47.2% | 18.8% | 16.5% | 27.5% |
| KIAA0513  | 9764   | 29.8% | 25.4% | 27.2% | 27.5% |
| PTCD1     | 26024  | 24.2% | 32.7% | 25.5% | 27.5% |
| LOC253012 | 253012 | 37.7% | 21.9% | 22.9% | 27.5% |
| MGST1     | 4257   | 35.3% | 26.2% | 20.8% | 27.5% |
| FLJ36674  | 284040 | 24.9% | 21.4% | 36.1% | 27.5% |
| RING1     | 6015   | 31.1% | 25.3% | 26.0% | 27.5% |
| RPL27A    | 6157   | 39.0% | 29.7% | 13.7% | 27.5% |
| KIAA1201  | 57476  | 26.6% | 31.6% | 24.3% | 27.5% |
| KIAA0179  | 23076  | 42.8% | 12.3% | 27.3% | 27.5% |
| MYBPC1    | 4604   | 37.9% | 18.8% | 25.8% | 27.5% |
| ZAP70     | 7535   | 24.0% | 31.1% | 27.3% | 27.5% |
| ZCCHC8    | 55596  | 26.7% | 28.9% | 26.7% | 27.5% |
| QIL1      | 125988 | 26.3% | 42.9% | 13.3% | 27.5% |
| MGAT5B    | 146664 | 35.4% | 24.3% | 22.7% | 27.5% |
| SCIN      | 85477  | 26.3% | 37.1% | 19.0% | 27.5% |
| PILRB     | 29990  | 24.4% | 25.2% | 32.9% | 27.5% |
| CREB5     | 9586   | 33.5% | 26.6% | 22.3% | 27.5% |
| FBXO34    | 55030  | 27.3% | 21.8% | 33.3% | 27.5% |
| HSN2      | 378465 | 26.3% | 23.4% | 32.7% | 27.5% |
| C21ORF57  | 54059  | 32.3% | 29.8% | 20.3% | 27.5% |
| PIGA      | 5277   | 40.2% | 10.7% | 31.6% | 27.5% |
| KLHL11    | 55175  | 24.0% | 28.6% | 29.8% | 27.5% |
| FOXG1B    | 2290   | 34.0% | 15.1% | 33.3% | 27.5% |
| PLA2G2F   | 64600  | 35.6% | 16.8% | 30.0% | 27.5% |
| CSORF16   | 285613 | 33.1% | 25.5% | 23.9% | 27.5% |
| STX16     | 8675   | 40.6% | 17.7% | 24.2% | 27.5% |
| VARS2L    | 57176  | 27.6% | 17.3% | 37.5% | 27.5% |
| GTF2H1    | 2965   | 36.3% | 22.8% | 23.4% | 27.5% |
| MTMR8     | 55613  | 32.0% | 27.6% | 22.9% | 27.5% |
| RTTN      | 25914  | 28.3% | 24.5% | 29.7% | 27.5% |
| FLJ13621  | 9662   | 22.2% | 25.0% | 35.3% | 27.5% |
| FLJ20527  | 54967  | 23.7% | 15.7% | 43.0% | 27.5% |
| SLC12A7   | 10723  | 33.5% | 24.4% | 24.6% | 27.5% |
| TRAM2     | 9697   | 23.4% | 28.0% | 31.1% | 27.5% |
| RGPD5     | 84220  | 30.1% | 26.5% | 25.9% | 27.5% |
| WBSCR16   | 81554  | 24.3% | 24.8% | 33.5% | 27.5% |
| GRIP1     | 23426  | 28.5% | 24.4% | 29.6% | 27.5% |
| CAPZA1    | 829    | 31.1% | 35.2% | 16.2% | 27.5% |
| PRDX1     | 5052   | 36.3% | 22.8% | 23.5% | 27.5% |
| SLC39A9   | 55334  | 22.4% | 35.3% | 24.8% | 27.5% |
| ZNF311    | 282890 | 28.7% | 30.5% | 23.3% | 27.5% |
| LOC441108 | 441108 | 28.0% | 32.8% | 21.8% | 27.5% |
| SNAI3     | 333929 | 36.0% | 29.0% | 17.6% | 27.5% |
| SNRP70    | 6625   | 27.7% | 29.6% | 25.2% | 27.5% |
| FOXL2     | 668    | 42.6% | 16.3% | 23.6% | 27.5% |
| HIVEP3    | 59269  | 27.5% | 25.6% | 29.4% | 27.5% |
| LSS       | 4047   | 33.1% | 22.9% | 26.5% | 27.5% |
| TFPI2     | 7980   | 23.8% | 30.6% | 28.2% | 27.5% |
| NFATC2    | 4773   | 35.4% | 19.9% | 27.2% | 27.5% |
| CCL2      | 6347   | 22.5% | 33.0% | 27.0% | 27.5% |
| LRRC1     | 55227  | 41.1% | 18.0% | 23.5% | 27.5% |
| LOC146206 | 146206 | 29.4% | 13.4% | 39.8% | 27.5% |
| FAM33A    | 348235 | 34.0% | 24.6% | 24.0% | 27.5% |
| TCN1      | 6947   | 38.2% | 21.8% | 22.6% | 27.5% |
| GCM2      | 9247   | 40.8% | 17.4% | 24.4% | 27.5% |
| NBEA      | 26960  | 26.7% | 29.3% | 26.6% | 27.5% |
| TFAM      | 7019   | 35.7% | 18.7% | 28.2% | 27.5% |
| MGC119295 | 441273 | 41.1% | 15.8% | 25.7% | 27.5% |
| HIVEP1    | 3096   | 39.0% | 20.5% | 23.1% | 27.5% |
| RPS19     | 6223   | 30.8% | 23.8% | 28.0% | 27.5% |
| GRIN2A    | 2903   | 32.5% | 22.8% | 27.3% | 27.5% |

|              |        |       |       |       |       |
|--------------|--------|-------|-------|-------|-------|
| PLEKHF2      | 79666  | 37.9% | 34.0% | 10.6% | 27.5% |
| UGGCL1       | 56886  | 30.4% | 26.2% | 26.0% | 27.5% |
| FLJ32884     | 149499 | 19.8% | 24.0% | 38.8% | 27.5% |
| PANX2        | 56666  | 29.7% | 29.8% | 23.1% | 27.5% |
| RET          | 5979   | 28.5% | 22.4% | 31.7% | 27.5% |
| PDLIM5       | 10611  | 28.2% | 27.3% | 27.0% | 27.5% |
| ELL2         | 22936  | 36.5% | 20.7% | 25.4% | 27.5% |
| MGC29649     | 283237 | 25.8% | 20.1% | 36.7% | 27.5% |
| MRPL13       | 28998  | 32.1% | 30.3% | 20.2% | 27.5% |
| PRKCG        | 5582   | 22.3% | 29.4% | 31.0% | 27.5% |
| MAP4K3       | 8491   | 20.3% | 30.7% | 31.7% | 27.5% |
| NALP10       | 338322 | 34.0% | 26.3% | 22.3% | 27.5% |
| HECTD1       | 25831  | 26.1% | 27.1% | 29.4% | 27.5% |
| TMEM47       | 83604  | 27.5% | 21.2% | 33.9% | 27.5% |
| ZNF132       | 7691   | 34.5% | 29.4% | 18.7% | 27.5% |
| LMAN1        | 3998   | 18.1% | 30.5% | 34.1% | 27.5% |
| FLJ20364     | 54908  | 27.1% | 29.5% | 26.0% | 27.5% |
| ADCK5        | 203054 | 22.6% | 28.8% | 31.3% | 27.5% |
| CTNNBIP1     | 56998  | 31.0% | 26.6% | 25.0% | 27.5% |
| FAM20A       | 54757  | 26.1% | 24.4% | 32.1% | 27.5% |
| TEX11        | 56159  | 37.9% | 23.5% | 21.3% | 27.5% |
| XG           | 7499   | 39.5% | 24.8% | 18.3% | 27.5% |
| SDBCAG84     | 51614  | 21.8% | 16.2% | 44.7% | 27.5% |
| MAWBP        | 64081  | 30.5% | 14.2% | 37.9% | 27.5% |
| CAPN3        | 825    | 31.9% | 33.1% | 17.7% | 27.5% |
| VIL2         | 7430   | 35.7% | 23.4% | 23.6% | 27.5% |
| MS4A10       | 341116 | 33.9% | 24.7% | 24.0% | 27.5% |
| INHBE        | 83729  | 34.1% | 29.1% | 19.4% | 27.5% |
| RNF13        | 11342  | 33.5% | 22.9% | 26.2% | 27.6% |
| ZRF1         | 27000  | 25.9% | 27.7% | 29.1% | 27.6% |
| SOX7         | 83595  | 28.2% | 23.8% | 30.7% | 27.6% |
| EIF4A2       | 1974   | 39.1% | 15.2% | 28.3% | 27.6% |
| THRSP        | 7069   | 36.7% | 13.8% | 32.1% | 27.6% |
| MGC5391      | 84826  | 15.2% | 33.0% | 34.5% | 27.6% |
| CPNE8        | 144402 | 32.1% | 21.6% | 29.0% | 27.6% |
| CHS1         | 1130   | 34.1% | 16.7% | 31.9% | 27.6% |
| STAC2        | 342667 | 38.3% | 24.5% | 19.8% | 27.6% |
| TRIM15       | 89870  | 36.9% | 14.5% | 31.3% | 27.6% |
| ZNF306       | 80317  | 31.4% | 32.6% | 18.8% | 27.6% |
| MEIS2        | 4212   | 28.7% | 23.7% | 30.3% | 27.6% |
| CAPZA2       | 830    | 36.3% | 25.4% | 21.1% | 27.6% |
| DKFZP434P162 | 283768 | 19.9% | 32.4% | 30.4% | 27.6% |
| CARKL        | 23729  | 35.2% | 28.2% | 19.2% | 27.6% |
| GORASP2      | 26003  | 26.1% | 27.6% | 29.1% | 27.6% |
| NPPB         | 4879   | 32.8% | 18.0% | 31.9% | 27.6% |
| C11ORF33     | 54827  | 30.4% | 26.7% | 25.5% | 27.6% |
| CHR3SYT      | 83850  | 21.9% | 27.0% | 33.8% | 27.6% |
| ULK4         | 54986  | 24.3% | 32.0% | 26.4% | 27.6% |
| TTRAP        | 51567  | 38.6% | 22.9% | 21.2% | 27.6% |
| AMIGO3       | 386724 | 29.9% | 23.0% | 29.8% | 27.6% |
| DMRTC2       | 63946  | 37.7% | 17.4% | 27.6% | 27.6% |
| HCCS         | 3052   | 32.5% | 17.1% | 33.1% | 27.6% |
| SDCCAG3      | 10807  | 35.0% | 20.4% | 27.3% | 27.6% |
| GABRR1       | 2569   | 25.4% | 32.3% | 25.0% | 27.6% |
| C2ORF22      | 130814 | 33.6% | 27.2% | 21.9% | 27.6% |
| FLJ10349     | 54707  | 24.9% | 31.7% | 26.2% | 27.6% |
| POLR2D       | 5433   | 44.6% | 16.3% | 21.8% | 27.6% |
| DAPP1        | 27071  | 34.5% | 23.4% | 24.9% | 27.6% |
| PPIC         | 5480   | 24.1% | 22.1% | 36.5% | 27.6% |
| MKNK2        | 2872   | 24.8% | 28.7% | 29.3% | 27.6% |
| EXOSC10      | 5394   | 22.6% | 32.2% | 27.9% | 27.6% |
| FLJ36208     | 283948 | 34.7% | 20.7% | 27.3% | 27.6% |
| RHOJ         | 57381  | 36.3% | 23.4% | 23.0% | 27.6% |
| MGC2776      | 80746  | 31.6% | 22.1% | 29.1% | 27.6% |
| DENND3       | 22898  | 26.0% | 29.2% | 27.5% | 27.6% |
| HR           | 55806  | 27.5% | 23.4% | 31.9% | 27.6% |
| HTO14        | 57095  | 32.2% | 12.4% | 38.2% | 27.6% |
| ARPI0        | 164668 | 19.8% | 18.9% | 44.1% | 27.6% |
| ILDR1        | 286676 | 29.5% | 25.7% | 27.5% | 27.6% |
| FLJ10006     | 55677  | 18.6% | 24.2% | 40.0% | 27.6% |
| PYCR1        | 5831   | 37.5% | 20.9% | 24.3% | 27.6% |
| BCR          | 613    | 25.2% | 24.4% | 33.1% | 27.6% |
| PSAP         | 5660   | 30.4% | 13.9% | 38.5% | 27.6% |
| FCGR1B       | 2210   | 36.7% | 22.3% | 23.8% | 27.6% |
| FLJ45187     | 387640 | 23.3% | 32.3% | 27.3% | 27.6% |
| CHM          | 1121   | 38.8% | 27.7% | 16.4% | 27.6% |
| CNOT3        | 4849   | 33.3% | 25.8% | 23.7% | 27.6% |
| LRCH2        | 57631  | 29.5% | 22.5% | 30.8% | 27.6% |
| DSG3         | 1830   | 34.4% | 23.4% | 25.0% | 27.6% |
| FAIM         | 55179  | 39.8% | 32.0% | 11.0% | 27.6% |
| RP3-402H5.2  | 442213 | 33.1% | 22.6% | 27.1% | 27.6% |
| TFCP2L1      | 29842  | 22.8% | 32.3% | 27.7% | 27.6% |
| PABPC4       | 8761   | 31.3% | 24.9% | 26.7% | 27.6% |
| FLJ35775     | 138009 | 20.5% | 35.2% | 27.2% | 27.6% |
| ZNF608       | 57507  | 33.2% | 27.3% | 22.3% | 27.6% |
| FLJ20674     | 54621  | 30.6% | 28.6% | 23.6% | 27.6% |
| PRKG2        | 5593   | 23.7% | 25.2% | 33.9% | 27.6% |
| PTPN5        | 84867  | 25.1% | 34.2% | 23.5% | 27.6% |
| FLJ31438     | 130162 | 38.9% | 19.7% | 24.2% | 27.6% |
| NEDD4L       | 23327  | 30.3% | 25.2% | 27.3% | 27.6% |
| POLR1C       | 9533   | 38.4% | 19.1% | 25.4% | 27.6% |
| DEFB118      | 117285 | 33.6% | 24.5% | 24.8% | 27.6% |
| TIMM22       | 29928  | 18.9% | 32.6% | 31.3% | 27.6% |
| RXFP3        | 51289  | 30.9% | 25.2% | 26.8% | 27.6% |
| HOXC8        | 3224   | 22.8% | 27.9% | 32.2% | 27.6% |
| SSBP4        | 170463 | 40.2% | 23.8% | 18.8% | 27.6% |
| SYT6         | 148281 | 37.4% | 21.0% | 24.5% | 27.6% |
| SLC16A7      | 9194   | 28.0% | 33.5% | 21.4% | 27.6% |

|               |        |       |       |       |       |
|---------------|--------|-------|-------|-------|-------|
| SEMA3D        | 223117 | 37.8% | 26.3% | 18.8% | 27.6% |
| C14ORF168     | 83544  | 15.4% | 39.5% | 27.9% | 27.6% |
| SLC15A3       | 51296  | 41.5% | 18.8% | 22.6% | 27.6% |
| CHD5          | 26038  | 30.3% | 26.5% | 26.1% | 27.6% |
| LYN           | 4067   | 26.0% | 24.6% | 32.2% | 27.6% |
| NKAP          | 79576  | 21.0% | 36.4% | 25.5% | 27.6% |
| FLJ20433      | 54932  | 30.1% | 25.7% | 27.1% | 27.6% |
| CPFB2         | 132864 | 24.2% | 23.8% | 35.0% | 27.6% |
| ABCF1         | 23     | 30.2% | 20.1% | 32.6% | 27.6% |
| CRYBA2        | 1412   | 34.7% | 25.8% | 22.4% | 27.6% |
| C3            | 718    | 34.4% | 18.9% | 29.6% | 27.6% |
| ATP6V0D2      | 245972 | 23.8% | 23.7% | 35.4% | 27.6% |
| CARD14        | 79092  | 26.5% | 33.3% | 23.1% | 27.6% |
| ANTXR1        | 84168  | 42.3% | 19.5% | 21.1% | 27.6% |
| MADP-1        | 85437  | 26.0% | 20.0% | 36.9% | 27.6% |
| ZNF514        | 84874  | 33.7% | 18.5% | 30.7% | 27.6% |
| LOC389293     | 389293 | 37.0% | 24.8% | 21.0% | 27.6% |
| KIAA0893      | 22911  | 20.5% | 37.5% | 24.9% | 27.6% |
| CHODL         | 140578 | 21.9% | 30.3% | 30.7% | 27.6% |
| TRIM32        | 22954  | 31.9% | 30.0% | 21.1% | 27.6% |
| HSR1S2BETA    | 55556  | 23.3% | 30.3% | 29.4% | 27.6% |
| VCY1B         | 353513 | 31.6% | 30.6% | 20.7% | 27.6% |
| C12ORF8       | 10961  | 22.0% | 24.0% | 37.0% | 27.6% |
| TMEM91        | 641649 | 31.3% | 26.7% | 25.0% | 27.6% |
| ZNF264        | 9422   | 29.8% | 29.1% | 24.0% | 27.6% |
| PTPRE         | 5791   | 26.2% | 31.8% | 25.0% | 27.6% |
| SIX3          | 6496   | 40.2% | 23.6% | 19.1% | 27.6% |
| BRODL         | 254065 | 31.5% | 19.6% | 31.8% | 27.6% |
| PPP1R3C       | 5507   | 30.3% | 31.0% | 21.6% | 27.6% |
| MGC42718      | 147719 | 24.0% | 27.5% | 31.5% | 27.6% |
| MTPN          | 136319 | 38.6% | 17.5% | 26.9% | 27.6% |
| LDOC1         | 23641  | 33.0% | 28.2% | 21.8% | 27.6% |
| UCN3          | 114131 | 26.5% | 32.5% | 24.0% | 27.6% |
| PLSCR3        | 57048  | 28.2% | 29.9% | 24.8% | 27.7% |
| XPA           | 7507   | 24.0% | 26.5% | 32.5% | 27.7% |
| LOC147808     | 147808 | 22.3% | 23.5% | 37.2% | 27.7% |
| MGC10067      | 134510 | 24.9% | 35.4% | 22.7% | 27.7% |
| SERPINA3      | 12     | 31.6% | 18.5% | 32.9% | 27.7% |
| HSH1G6        | 139562 | 20.8% | 28.6% | 33.5% | 27.7% |
| CFDP1         | 10428  | 32.9% | 24.2% | 25.9% | 27.7% |
| DISP1         | 84976  | 27.9% | 26.4% | 28.8% | 27.7% |
| CYL1          | 1538   | 34.3% | 23.4% | 25.3% | 27.7% |
| HCG27         | 253018 | 28.3% | 29.5% | 25.2% | 27.7% |
| TAF15         | 8148   | 26.7% | 22.0% | 34.3% | 27.7% |
| POLK          | 51426  | 30.2% | 23.9% | 28.9% | 27.7% |
| TACC1         | 6867   | 22.7% | 28.9% | 31.4% | 27.7% |
| SBNO1         | 55206  | 31.9% | 26.4% | 24.7% | 27.7% |
| PAOX          | 196743 | 33.0% | 27.3% | 22.7% | 27.7% |
| NFATC3        | 4775   | 29.9% | 30.4% | 22.7% | 27.7% |
| RNF19         | 25897  | 34.2% | 20.3% | 28.5% | 27.7% |
| FLJ43080      | 642987 | 38.8% | 27.7% | 16.5% | 27.7% |
| LOC54499      | 54499  | 21.5% | 25.8% | 35.7% | 27.7% |
| FLJ21827      | 56912  | 29.3% | 22.6% | 31.0% | 27.7% |
| PTPRS         | 5802   | 28.1% | 31.8% | 23.0% | 27.7% |
| KIAA0241      | 23080  | 33.7% | 20.2% | 29.1% | 27.7% |
| HSPC117       | 51493  | 26.6% | 19.4% | 37.0% | 27.7% |
| RAPGEF6       | 51735  | 34.5% | 19.5% | 29.1% | 27.7% |
| LOC113828     | 113828 | 20.8% | 26.1% | 36.2% | 27.7% |
| UNQ564        | 283298 | 24.1% | 23.9% | 35.0% | 27.7% |
| PCDH10        | 57575  | 43.6% | 24.2% | 15.3% | 27.7% |
| LOC162967     | 162967 | 34.0% | 23.3% | 25.8% | 27.7% |
| FLJ35784      | 374877 | 30.6% | 26.4% | 26.0% | 27.7% |
| UPF2          | 26019  | 24.4% | 22.1% | 36.6% | 27.7% |
| BCL7C         | 9274   | 22.2% | 31.8% | 29.0% | 27.7% |
| C6ORF4        | 10758  | 15.5% | 27.1% | 40.3% | 27.7% |
| UXS1          | 80146  | 24.1% | 32.8% | 26.2% | 27.7% |
| FHL1          | 2273   | 32.0% | 20.7% | 30.3% | 27.7% |
| TDE1          | 10955  | 36.6% | 22.2% | 24.3% | 27.7% |
| LEM3          | 23592  | 25.5% | 24.1% | 33.5% | 27.7% |
| LRR33         | 375387 | 30.6% | 27.5% | 24.9% | 27.7% |
| C9ORF90       | 203245 | 40.0% | 30.1% | 13.0% | 27.7% |
| PRR4          | 11272  | 40.5% | 23.1% | 19.5% | 27.7% |
| FLJ39502      | 285025 | 26.1% | 30.9% | 26.1% | 27.7% |
| FND4          | 64838  | 26.3% | 41.1% | 15.6% | 27.7% |
| DKFZP761P0423 | 157285 | 23.5% | 26.6% | 33.0% | 27.7% |
| RAB32         | 10981  | 37.6% | 22.7% | 22.7% | 27.7% |
| CDKL2         | 8999   | 29.0% | 29.4% | 24.6% | 27.7% |
| LRRFIP1       | 9208   | 36.1% | 24.4% | 22.5% | 27.7% |
| ASPM          | 259266 | 44.7% | 23.5% | 14.9% | 27.7% |
| RAI           | 10848  | 23.4% | 20.2% | 39.4% | 27.7% |
| FMO4          | 2329   | 32.9% | 24.0% | 26.1% | 27.7% |
| MCART6        | 401612 | 33.1% | 19.1% | 30.8% | 27.7% |
| EDG8          | 53637  | 26.0% | 28.1% | 29.0% | 27.7% |
| SLC12A9       | 56996  | 34.6% | 24.7% | 23.8% | 27.7% |
| LU            | 4059   | 39.4% | 19.5% | 24.2% | 27.7% |
| TGIF2LY       | 90655  | 20.4% | 28.4% | 34.2% | 27.7% |
| AGR2          | 10551  | 25.3% | 23.8% | 34.0% | 27.7% |
| ARHGAP15      | 22899  | 33.1% | 25.8% | 24.1% | 27.7% |
| KIF2C         | 11004  | 34.4% | 22.6% | 26.1% | 27.7% |
| MAPK14        | 1432   | 33.1% | 23.6% | 26.4% | 27.7% |
| GGA2          | 23062  | 38.8% | 25.0% | 19.4% | 27.7% |
| HIP14         | 23390  | 17.5% | 23.4% | 42.2% | 27.7% |
| MCCC2         | 64087  | 30.1% | 31.1% | 21.9% | 27.7% |
| C14ORF39      | 317761 | 26.0% | 22.0% | 35.1% | 27.7% |
| U1SNRNPBP     | 11066  | 31.5% | 24.4% | 27.2% | 27.7% |
| PPP4R2        | 151987 | 37.7% | 27.1% | 18.4% | 27.7% |
| CASP1         | 834    | 25.0% | 33.3% | 24.8% | 27.7% |
| HSPA1B        | 3304   | 32.7% | 30.7% | 19.7% | 27.7% |

|           |        |       |       |       |       |
|-----------|--------|-------|-------|-------|-------|
| RFPL1     | 5988   | 29.5% | 24.7% | 29.0% | 27.7% |
| FBXO43    | 286151 | 28.5% | 29.3% | 25.3% | 27.7% |
| NUP214    | 8021   | 30.8% | 30.5% | 21.9% | 27.7% |
| DCNP1     | 140947 | 26.5% | 24.2% | 32.5% | 27.7% |
| GOLPH4    | 27333  | 32.3% | 22.5% | 28.3% | 27.7% |
| BAT1      | 7919   | 19.8% | 30.5% | 32.8% | 27.7% |
| OR10H3    | 26532  | 24.8% | 30.0% | 28.4% | 27.7% |
| PITRM1    | 10531  | 29.3% | 32.6% | 21.3% | 27.7% |
| BIK       | 638    | 31.5% | 22.2% | 29.5% | 27.7% |
| C14ORF131 | 55778  | 40.3% | 22.1% | 20.8% | 27.7% |
| LOC342933 | 342933 | 32.1% | 22.9% | 28.2% | 27.7% |
| DOCK8     | 81704  | 6.7%  | 15.4% | 61.1% | 27.7% |
| HMX1      | 3166   | 28.6% | 25.1% | 29.5% | 27.7% |
| LOC168850 | 168850 | 23.4% | 20.7% | 39.0% | 27.7% |
| SPAG4L    | 140732 | 34.2% | 19.6% | 29.4% | 27.7% |
| C19ORF26  | 255057 | 31.0% | 29.8% | 22.4% | 27.7% |
| RORB      | 6096   | 23.7% | 24.3% | 35.1% | 27.7% |
| TBC1D20   | 128637 | 36.9% | 15.8% | 30.4% | 27.7% |
| FTL       | 2512   | 35.7% | 22.7% | 24.8% | 27.7% |
| HES3      | 390992 | 41.7% | 24.2% | 17.2% | 27.7% |
| DERL1     | 79139  | 34.0% | 24.5% | 24.7% | 27.7% |
| LOC388419 | 388419 | 29.9% | 21.3% | 32.0% | 27.7% |
| KIAA0252  | 23168  | 29.9% | 24.5% | 28.8% | 27.7% |
| TM4SF1    | 4071   | 23.9% | 33.0% | 26.2% | 27.7% |
| PKHD1L1   | 93035  | 32.1% | 17.0% | 34.0% | 27.7% |
| CLN6      | 54982  | 34.0% | 20.3% | 28.9% | 27.7% |
| MMP15     | 4324   | 25.0% | 30.1% | 28.1% | 27.7% |
| FIGLA     | 344018 | 28.4% | 28.7% | 26.1% | 27.7% |
| FLJ25801  | 205860 | 21.3% | 26.4% | 35.4% | 27.7% |
| ABHD4     | 63874  | 28.9% | 27.4% | 26.9% | 27.7% |
| PRB4      | 5545   | 32.2% | 17.9% | 33.1% | 27.7% |
| SYT15     | 83849  | 34.9% | 22.7% | 25.6% | 27.7% |
| GCK       | 2645   | 33.8% | 24.7% | 24.7% | 27.7% |
| LOC165186 | 165186 | 26.7% | 27.7% | 28.7% | 27.7% |
| ZNF259    | 8882   | 43.4% | 19.5% | 20.3% | 27.7% |
| NXPH4     | 11247  | 35.5% | 22.7% | 25.0% | 27.7% |
| MGC12966  | 84792  | 30.3% | 22.4% | 30.5% | 27.7% |
| ZMYND19   | 116225 | 33.6% | 25.4% | 24.1% | 27.7% |
| RGS10     | 6001   | 28.8% | 30.3% | 24.1% | 27.7% |
| MUS81     | 80198  | 34.1% | 26.9% | 22.2% | 27.7% |
| OPN5      | 221391 | 30.4% | 19.3% | 33.5% | 27.7% |
| S100A4    | 6275   | 22.2% | 33.5% | 27.5% | 27.7% |
| GNAQ      | 2776   | 30.4% | 29.4% | 23.4% | 27.7% |
| FLJ25369  | 200523 | 25.7% | 24.2% | 33.3% | 27.7% |
| HNRPUL1   | 11100  | 33.3% | 23.7% | 26.2% | 27.7% |
| DMRT3     | 58524  | 35.2% | 27.2% | 20.8% | 27.7% |
| FMNL2     | 114793 | 38.7% | 15.4% | 29.1% | 27.7% |
| UTRN      | 7402   | 36.4% | 18.1% | 28.8% | 27.7% |
| CKB       | 1152   | 32.8% | 21.3% | 29.1% | 27.7% |
| RAF1      | 5894   | 22.6% | 37.8% | 22.8% | 27.7% |
| FLJ11126  | 55308  | 33.5% | 26.3% | 23.5% | 27.7% |
| FBXW2     | 26190  | 34.0% | 21.6% | 27.7% | 27.8% |
| KRTHB6    | 3892   | 31.3% | 14.2% | 37.8% | 27.8% |
| SUHW4     | 54816  | 34.2% | 32.6% | 16.5% | 27.8% |
| NALP6     | 171389 | 25.5% | 16.9% | 40.9% | 27.8% |
| CRYGB     | 1419   | 47.3% | 21.2% | 14.8% | 27.8% |
| CLEC5A    | 23601  | 26.9% | 28.0% | 28.4% | 27.8% |
| LOC641522 | 641522 | 12.2% | 37.5% | 33.5% | 27.8% |
| CCHCR1    | 54535  | 25.7% | 30.0% | 27.6% | 27.8% |
| KRTAP18-7 | 386675 | 28.3% | 17.4% | 37.5% | 27.8% |
| CCT6B     | 10693  | 36.3% | 16.1% | 30.8% | 27.8% |
| LY6G6C    | 80740  | 25.4% | 29.7% | 28.2% | 27.8% |
| BMPRI1B   | 658    | 29.9% | 22.7% | 30.6% | 27.8% |
| FBN3      | 84467  | 30.2% | 29.2% | 23.9% | 27.8% |
| PNAS-4    | 51029  | 20.4% | 26.8% | 36.1% | 27.8% |
| CRTC1     | 23373  | 24.2% | 28.3% | 30.7% | 27.8% |
| CMMA1     | 1215   | 37.3% | 27.3% | 18.7% | 27.8% |
| IFT122    | 55764  | 22.7% | 23.7% | 36.9% | 27.8% |
| PCSK5     | 5125   | 26.6% | 30.8% | 25.9% | 27.8% |
| ZNF618    | 114991 | 31.9% | 23.6% | 27.7% | 27.8% |
| ARNTL     | 406    | 30.8% | 25.1% | 27.4% | 27.8% |
| PAPD1     | 55149  | 30.4% | 27.7% | 25.2% | 27.8% |
| MGC20781  | 115024 | 28.7% | 19.5% | 35.1% | 27.8% |
| LOC284018 | 284018 | 25.0% | 28.6% | 29.7% | 27.8% |
| KLHL7     | 55975  | 34.5% | 24.0% | 24.8% | 27.8% |
| PPP1R12C  | 54776  | 35.0% | 24.0% | 24.3% | 27.8% |
| KRTAP20-3 | 337985 | 38.3% | 26.0% | 19.0% | 27.8% |
| DEFA5     | 1670   | 26.2% | 24.9% | 32.3% | 27.8% |
| C10ORF68  | 79741  | 33.3% | 27.5% | 22.5% | 27.8% |
| PPHLN1    | 51535  | 30.4% | 26.1% | 26.9% | 27.8% |
| KRT15     | 3866   | 25.0% | 27.1% | 31.2% | 27.8% |
| TNFRSF19  | 55504  | 41.7% | 16.9% | 24.7% | 27.8% |
| PI4KII    | 55361  | 30.7% | 30.8% | 21.9% | 27.8% |
| PCDHGA2   | 56113  | 36.4% | 28.2% | 18.7% | 27.8% |
| GAK       | 2580   | 22.1% | 28.9% | 32.3% | 27.8% |
| MTL5      | 9633   | 30.4% | 22.7% | 30.2% | 27.8% |
| FLJ20643  | 55011  | 28.2% | 25.4% | 29.7% | 27.8% |
| MUC15     | 143662 | 39.1% | 19.9% | 24.3% | 27.8% |
| PSG1      | 5669   | 35.8% | 22.7% | 24.9% | 27.8% |
| FLI1      | 2313   | 27.8% | 24.8% | 30.8% | 27.8% |
| ZNF157    | 7712   | 32.9% | 26.4% | 24.1% | 27.8% |
| STK32C    | 282974 | 26.4% | 29.3% | 27.7% | 27.8% |
| SLCO1B1   | 10599  | 36.4% | 25.6% | 21.4% | 27.8% |
| GATA3     | 2625   | 32.8% | 24.3% | 26.3% | 27.8% |
| SLC16A11  | 162515 | 47.2% | 15.7% | 20.4% | 27.8% |
| ALDOC     | 230    | 21.8% | 32.7% | 28.8% | 27.8% |
| TDP1      | 55775  | 30.9% | 18.3% | 34.1% | 27.8% |
| LOC254359 | 254359 | 31.8% | 21.5% | 30.1% | 27.8% |

|               |        |       |       |       |       |
|---------------|--------|-------|-------|-------|-------|
| CSPG2         | 1462   | 29.3% | 18.5% | 35.6% | 27.8% |
| GST2A         | 2939   | 31.8% | 15.7% | 35.8% | 27.8% |
| PLA2G4C       | 8605   | 21.0% | 34.5% | 27.9% | 27.8% |
| GRIK2         | 2898   | 22.6% | 32.2% | 28.5% | 27.8% |
| RHBDL6        | 79651  | 24.4% | 30.5% | 28.5% | 27.8% |
| OR5111        | 390063 | 30.5% | 24.7% | 28.2% | 27.8% |
| KIAA0553      | 23131  | 24.2% | 27.1% | 32.0% | 27.8% |
| PENT          | 10400  | 24.3% | 28.0% | 31.0% | 27.8% |
| C10ORF24      | 219736 | 25.4% | 31.0% | 27.0% | 27.8% |
| LOC642678     | 642678 | 33.5% | 20.2% | 29.7% | 27.8% |
| ADCK1         | 57143  | 32.2% | 22.1% | 29.1% | 27.8% |
| ABL1          | 25     | 26.9% | 31.6% | 24.9% | 27.8% |
| ELA2          | 1991   | 34.7% | 28.5% | 20.3% | 27.8% |
| C20ORF96      | 140680 | 37.7% | 20.2% | 25.5% | 27.8% |
| GLMN          | 11146  | 32.6% | 23.2% | 27.6% | 27.8% |
| LOC493869     | 493869 | 34.8% | 17.7% | 31.0% | 27.8% |
| APOL2         | 23780  | 27.3% | 31.6% | 24.5% | 27.8% |
| FLJ10774      | 55226  | 34.5% | 27.3% | 21.6% | 27.8% |
| MFTC          | 81034  | 35.2% | 23.6% | 24.6% | 27.8% |
| SLC39A1       | 27173  | 40.4% | 28.5% | 14.5% | 27.8% |
| DNCH2         | 79659  | 22.4% | 19.7% | 41.4% | 27.8% |
| FLJ45909      | 126432 | 29.4% | 18.2% | 35.9% | 27.8% |
| MFAP2         | 4237   | 32.9% | 28.9% | 21.6% | 27.8% |
| SAT           | 6303   | 30.4% | 20.6% | 32.5% | 27.8% |
| MGC26647      | 219557 | 43.8% | 23.9% | 15.8% | 27.8% |
| FCGR2A        | 2212   | 27.9% | 23.3% | 32.3% | 27.8% |
| LOC90806      | 90806  | 23.5% | 29.4% | 30.6% | 27.8% |
| TPTE          | 7179   | 27.0% | 28.5% | 28.0% | 27.8% |
| XPR1          | 9213   | 31.7% | 26.6% | 25.2% | 27.8% |
| C14ORF122     | 51016  | 31.6% | 24.1% | 27.8% | 27.8% |
| LOC64744      | 64744  | 25.3% | 23.6% | 34.5% | 27.8% |
| EPHA2         | 1969   | 30.6% | 24.9% | 28.0% | 27.8% |
| BEAN          | 146227 | 25.5% | 32.3% | 25.7% | 27.8% |
| GPR158        | 57512  | 32.6% | 22.7% | 28.1% | 27.8% |
| MGC15937      | 92292  | 50.8% | 26.1% | 6.6%  | 27.8% |
| LOC90410      | 90410  | 30.6% | 14.8% | 38.0% | 27.8% |
| CYP2C8        | 1558   | 37.5% | 21.3% | 24.7% | 27.8% |
| AUTS2         | 26053  | 40.5% | 15.6% | 27.4% | 27.8% |
| TCL1B         | 9623   | 30.6% | 31.7% | 21.2% | 27.8% |
| FAM3D         | 131177 | 27.0% | 21.3% | 35.2% | 27.8% |
| TUSC2         | 11334  | 30.7% | 21.0% | 31.8% | 27.8% |
| ZNF77         | 58492  | 30.6% | 32.0% | 20.8% | 27.8% |
| FLJ12903      | 64766  | 25.2% | 16.6% | 41.7% | 27.8% |
| TEP1          | 7011   | 25.0% | 28.6% | 30.0% | 27.8% |
| MGA           | 23269  | 32.1% | 30.6% | 20.8% | 27.8% |
| KIR3DL3       | 115653 | 36.0% | 17.5% | 30.1% | 27.8% |
| RAG1          | 5896   | 28.4% | 26.6% | 28.6% | 27.8% |
| ICA1          | 3382   | 34.4% | 18.5% | 30.7% | 27.8% |
| SNX6          | 58533  | 16.9% | 36.5% | 30.1% | 27.8% |
| SLC9A8        | 23315  | 33.2% | 27.5% | 22.8% | 27.8% |
| WDR26         | 80232  | 37.6% | 27.7% | 18.2% | 27.8% |
| IFNGR2        | 3460   | 45.3% | 13.0% | 25.2% | 27.9% |
| C10orf54      | 64115  | 30.8% | 30.7% | 22.0% | 27.9% |
| NEK9          | 91754  | 29.1% | 29.2% | 25.3% | 27.9% |
| ZNF3          | 7551   | 25.0% | 26.5% | 32.1% | 27.9% |
| EDAR          | 10913  | 38.9% | 23.1% | 21.6% | 27.9% |
| MEP1B         | 4225   | 33.6% | 32.5% | 17.6% | 27.9% |
| ZNF545        | 284406 | 31.2% | 29.1% | 23.3% | 27.9% |
| SAMD6         | 203286 | 29.3% | 19.9% | 34.3% | 27.9% |
| MGC42090      | 256130 | 38.4% | 22.8% | 22.4% | 27.9% |
| CFHL3         | 10878  | 38.5% | 17.6% | 27.5% | 27.9% |
| WBSCR20B      | 155400 | 43.2% | 19.2% | 21.2% | 27.9% |
| GATS          | 352954 | 29.4% | 30.5% | 23.7% | 27.9% |
| ADAMTS20      | 80070  | 42.7% | 21.3% | 19.7% | 27.9% |
| CIDEA         | 1149   | 40.9% | 17.2% | 25.4% | 27.9% |
| ANKRD26       | 22852  | 31.4% | 23.8% | 28.4% | 27.9% |
| CSORF13       | 9315   | 30.2% | 18.5% | 34.9% | 27.9% |
| FLJ11127      | 54491  | 28.5% | 25.3% | 29.8% | 27.9% |
| ATF7          | 11016  | 26.6% | 26.2% | 30.7% | 27.9% |
| VAT1          | 10493  | 32.6% | 23.1% | 27.9% | 27.9% |
| DIAPH1        | 1729   | 29.4% | 25.6% | 28.6% | 27.9% |
| FLJ12443      | 79888  | 40.8% | 21.8% | 21.0% | 27.9% |
| KIAA1365      | 57554  | 23.6% | 30.2% | 29.7% | 27.9% |
| SURF6         | 6838   | 31.2% | 22.5% | 29.9% | 27.9% |
| FREM2         | 341640 | 32.9% | 22.0% | 28.8% | 27.9% |
| LOC116068     | 116068 | 31.2% | 28.3% | 24.1% | 27.9% |
| PLEKH1C1      | 10979  | 27.4% | 23.1% | 33.1% | 27.9% |
| CCDC7         | 221016 | 35.8% | 23.4% | 24.4% | 27.9% |
| NEFH          | 4744   | 44.9% | 18.3% | 20.4% | 27.9% |
| CYP2S1        | 29785  | 38.5% | 26.1% | 19.1% | 27.9% |
| PALD          | 27143  | 31.6% | 30.0% | 22.0% | 27.9% |
| ACO2          | 50     | 28.4% | 33.1% | 22.2% | 27.9% |
| PAK1IP1       | 55003  | 33.6% | 26.2% | 23.8% | 27.9% |
| MDN1          | 23195  | 32.2% | 18.3% | 33.1% | 27.9% |
| PYGB          | 5834   | 33.1% | 21.6% | 29.0% | 27.9% |
| LOC402117     | 402117 | 45.5% | 17.4% | 20.8% | 27.9% |
| DNAJC9        | 23234  | 39.4% | 20.8% | 23.4% | 27.9% |
| MGC4618       | 84286  | 27.8% | 25.0% | 30.9% | 27.9% |
| CNTNAP4       | 85445  | 22.1% | 31.8% | 29.8% | 27.9% |
| SLC25A12      | 8604   | 46.2% | 12.5% | 25.0% | 27.9% |
| DKFZP762C2414 | 339201 | 21.5% | 17.2% | 45.0% | 27.9% |
| IMPA2         | 3613   | 25.8% | 34.5% | 23.4% | 27.9% |
| R3HDM1        | 140902 | 27.2% | 30.2% | 26.3% | 27.9% |
| N4BP2         | 55728  | 31.0% | 22.7% | 30.0% | 27.9% |
| STAC3         | 246329 | 23.3% | 26.0% | 34.4% | 27.9% |
| VCAM1         | 7412   | 30.6% | 19.0% | 34.1% | 27.9% |
| DNAH1         | 25981  | 43.2% | 19.8% | 20.6% | 27.9% |
| CEI           | 153571 | 20.8% | 25.0% | 37.8% | 27.9% |



|           |        |       |       |       |       |
|-----------|--------|-------|-------|-------|-------|
| DYRK2     | 8445   | 30.9% | 25.0% | 27.8% | 27.9% |
| OR2F2     | 135948 | 40.5% | 23.4% | 19.8% | 27.9% |
| PTPN21    | 11099  | 24.3% | 34.1% | 25.2% | 27.9% |
| KIAA1377  | 57562  | 30.0% | 24.8% | 28.8% | 27.9% |
| OR7D2     | 162998 | 28.0% | 26.9% | 28.8% | 27.9% |
| IBRDC3    | 127544 | 32.6% | 19.9% | 31.2% | 27.9% |
| FBXO36    | 130888 | 34.1% | 23.0% | 26.6% | 27.9% |
| KCNH3     | 23416  | 41.3% | 16.7% | 25.7% | 27.9% |
| GIMAP5    | 55340  | 38.5% | 17.9% | 27.3% | 27.9% |
| KIAA0672  | 9912   | 28.1% | 37.2% | 18.4% | 27.9% |
| ZNF341    | 84905  | 29.2% | 20.4% | 34.1% | 27.9% |
| CHPF      | 79586  | 32.5% | 23.0% | 28.3% | 27.9% |
| SYNGR2    | 9144   | 20.7% | 22.6% | 40.4% | 27.9% |
| MAP3K9    | 4293   | 28.4% | 26.5% | 28.8% | 27.9% |
| KIF3C     | 3797   | 18.9% | 43.6% | 21.2% | 27.9% |
| SMYD2     | 56950  | 30.2% | 17.8% | 35.7% | 27.9% |
| OBRGRP    | 54741  | 25.3% | 28.2% | 30.2% | 27.9% |
| KIAA1622  | 57718  | 35.3% | 30.2% | 18.3% | 27.9% |
| MGC2629   | 84614  | 27.3% | 24.1% | 32.3% | 27.9% |
| LOC389458 | 389458 | 48.8% | 21.8% | 13.1% | 27.9% |
| ZNF596    | 169270 | 28.3% | 19.8% | 35.7% | 27.9% |
| CDC43     | 83461  | 37.7% | 24.7% | 21.3% | 27.9% |
| LOC144097 | 144097 | 32.1% | 25.3% | 26.3% | 27.9% |
| ZNF561    | 93134  | 19.5% | 30.6% | 33.6% | 27.9% |
| ADAMTS6   | 11174  | 33.9% | 25.6% | 24.3% | 27.9% |
| RS1       | 6247   | 38.1% | 19.7% | 26.0% | 27.9% |
| OR1S2     | 219958 | 33.8% | 15.6% | 34.3% | 27.9% |
| CMAS      | 55907  | 35.9% | 23.3% | 24.6% | 27.9% |
| ZNF32     | 7580   | 38.9% | 13.3% | 31.5% | 27.9% |
| KIAA1683  | 80726  | 48.2% | 22.1% | 13.4% | 27.9% |
| C6ORF197  | 55633  | 35.8% | 16.2% | 31.8% | 27.9% |
| TM9SF4    | 9777   | 25.7% | 32.9% | 25.1% | 27.9% |
| C5ORF4    | 10826  | 46.9% | 13.8% | 23.0% | 27.9% |
| TAS1R2    | 80834  | 38.6% | 29.7% | 15.5% | 27.9% |
| CLCN4     | 1183   | 33.4% | 24.8% | 25.5% | 27.9% |
| CCRL1     | 51554  | 35.7% | 19.5% | 28.6% | 27.9% |
| HBLD1     | 122961 | 23.2% | 35.8% | 24.8% | 27.9% |
| PHKA2     | 5256   | 28.0% | 28.2% | 27.6% | 27.9% |
| C21ORF7   | 56911  | 26.2% | 18.5% | 39.1% | 27.9% |
| LOC780776 | 780776 | 42.2% | 19.1% | 22.4% | 27.9% |
| MDS018    | 60490  | 36.7% | 22.6% | 24.4% | 27.9% |
| ACOX2     | 8309   | 31.9% | 25.6% | 26.3% | 27.9% |
| ATG9A     | 79065  | 34.8% | 17.4% | 31.6% | 27.9% |
| EPM2A     | 7957   | 27.9% | 28.7% | 27.2% | 27.9% |
| LOC285513 | 285513 | 19.7% | 32.9% | 31.3% | 27.9% |
| ZNF540    | 163255 | 34.7% | 26.5% | 22.5% | 27.9% |
| FLJ20584  | 54991  | 22.9% | 34.4% | 26.5% | 27.9% |
| RNGTT     | 8732   | 38.4% | 28.9% | 16.4% | 27.9% |
| PCDH82    | 56133  | 35.1% | 27.1% | 21.6% | 27.9% |
| KCNN4     | 3783   | 34.5% | 24.8% | 24.5% | 27.9% |
| SCNN1A    | 6337   | 33.2% | 23.5% | 27.0% | 27.9% |
| LOC89894  | 89894  | 23.3% | 29.3% | 31.2% | 27.9% |
| CXXCS     | 51523  | 43.8% | 21.6% | 18.4% | 27.9% |
| ACPT      | 93650  | 32.0% | 26.3% | 25.5% | 27.9% |
| TAF1C     | 9013   | 33.5% | 24.7% | 25.6% | 27.9% |
| SNCA      | 6622   | 26.0% | 30.6% | 27.2% | 27.9% |
| ERBB4     | 2066   | 22.7% | 26.9% | 34.3% | 27.9% |
| OLFM13    | 56944  | 30.1% | 25.5% | 28.2% | 27.9% |
| SPOCK     | 6695   | 30.5% | 20.3% | 33.0% | 27.9% |
| MRPS25    | 64432  | 26.1% | 27.8% | 29.9% | 27.9% |
| BET1L     | 51272  | 34.8% | 20.5% | 28.5% | 27.9% |
| EIF2A     | 83939  | 26.8% | 23.8% | 33.3% | 27.9% |
| XTP7      | 90332  | 26.2% | 23.9% | 33.7% | 27.9% |
| ENAM      | 10117  | 35.1% | 28.2% | 20.6% | 27.9% |
| POU6F2    | 11281  | 40.2% | 20.1% | 23.6% | 27.9% |
| CCNDBP1   | 23582  | 43.2% | 16.5% | 24.2% | 27.9% |
| ZNF390    | 222696 | 41.4% | 15.8% | 26.7% | 28.0% |
| KIAA2001  | 340526 | 37.1% | 18.7% | 28.0% | 28.0% |
| SLC2A4    | 6517   | 31.4% | 24.4% | 28.1% | 28.0% |
| S100A9    | 6280   | 34.7% | 27.9% | 21.2% | 28.0% |
| SPRR2B    | 6701   | 27.3% | 28.6% | 28.0% | 28.0% |
| OR2AK2    | 391191 | 33.5% | 34.1% | 16.2% | 28.0% |
| CLDN23    | 137075 | 43.6% | 22.9% | 17.3% | 28.0% |
| FLJ36090  | 153241 | 28.6% | 21.7% | 33.5% | 28.0% |
| CACNA2D4  | 93589  | 28.5% | 26.6% | 28.7% | 28.0% |
| PCSK1     | 5122   | 31.3% | 28.7% | 23.8% | 28.0% |
| FCFBP1    | 64168  | 25.9% | 30.1% | 27.8% | 28.0% |
| HT007     | 55863  | 24.8% | 24.7% | 34.3% | 28.0% |
| CDIPT     | 10423  | 34.0% | 23.6% | 26.3% | 28.0% |
| PPP1R13B  | 23368  | 35.4% | 28.2% | 20.3% | 28.0% |
| ALK       | 238    | 22.9% | 32.4% | 28.6% | 28.0% |
| PPP1CB    | 5500   | 23.5% | 30.7% | 29.7% | 28.0% |
| STIP1     | 10963  | 32.8% | 18.0% | 33.1% | 28.0% |
| MAST2     | 23139  | 19.8% | 31.2% | 32.9% | 28.0% |
| USP22     | 23326  | 22.0% | 26.1% | 35.8% | 28.0% |
| TMEM38B   | 55151  | 36.1% | 23.1% | 24.6% | 28.0% |
| OTOF      | 9381   | 36.1% | 20.0% | 27.8% | 28.0% |
| KIAA1173  | 57467  | 26.2% | 31.6% | 26.1% | 28.0% |
| C6ORF154  | 221424 | 28.9% | 20.5% | 34.5% | 28.0% |
| CYC1      | 1537   | 34.6% | 25.6% | 23.8% | 28.0% |
| LOC284323 | 284323 | 24.2% | 24.7% | 35.0% | 28.0% |
| YWHAG     | 7532   | 32.1% | 16.7% | 35.1% | 28.0% |
| CHRNE     | 1145   | 29.8% | 22.5% | 31.6% | 28.0% |
| ARL4C     | 10123  | 28.5% | 24.0% | 31.4% | 28.0% |
| SPINK5L2  | 408187 | 35.6% | 27.5% | 20.9% | 28.0% |
| OR13A1    | 79290  | 29.6% | 28.6% | 25.7% | 28.0% |
| SCN8A     | 6334   | 31.1% | 26.8% | 26.0% | 28.0% |
| CMYA1     | 165904 | 22.9% | 26.0% | 35.0% | 28.0% |

|              |        |       |       |       |       |
|--------------|--------|-------|-------|-------|-------|
| USP25        | 29761  | 38.6% | 22.0% | 23.3% | 28.0% |
| IHPK2        | 51447  | 27.9% | 27.2% | 28.9% | 28.0% |
| NMU          | 10874  | 30.1% | 25.3% | 28.5% | 28.0% |
| SPACA4       | 171169 | 31.5% | 25.3% | 27.1% | 28.0% |
| GZMA         | 3001   | 29.6% | 28.4% | 25.9% | 28.0% |
| TPSD1        | 23430  | 31.9% | 26.0% | 26.0% | 28.0% |
| COL1A1       | 1277   | 30.0% | 19.7% | 34.2% | 28.0% |
| LOC129401    | 129401 | 46.4% | 25.0% | 12.5% | 28.0% |
| ASPH         | 444    | 29.4% | 21.3% | 33.2% | 28.0% |
| C10ORF65     | 112817 | 38.5% | 18.4% | 27.0% | 28.0% |
| LY75         | 4065   | 17.8% | 38.1% | 28.0% | 28.0% |
| USP32        | 84669  | 29.5% | 30.0% | 24.5% | 28.0% |
| AGRN         | 375790 | 34.6% | 24.6% | 24.8% | 28.0% |
| KIAA1522     | 57648  | 27.8% | 29.1% | 27.1% | 28.0% |
| BZW1         | 9689   | 31.4% | 17.9% | 34.6% | 28.0% |
| RIOK2        | 55781  | 31.6% | 27.0% | 25.3% | 28.0% |
| LIPA         | 3988   | 41.3% | 16.0% | 26.7% | 28.0% |
| FLJ37396     | 285754 | 38.8% | 25.3% | 19.9% | 28.0% |
| MAGEA1       | 4100   | 28.4% | 21.6% | 34.0% | 28.0% |
| TLE3         | 7090   | 33.6% | 24.6% | 25.8% | 28.0% |
| FLJ43965     | 389206 | 29.3% | 17.9% | 36.8% | 28.0% |
| JARID1A      | 5927   | 25.9% | 31.2% | 26.9% | 28.0% |
| RNF157       | 114804 | 31.0% | 21.6% | 31.4% | 28.0% |
| MGC47869     | 144608 | 20.6% | 27.9% | 35.5% | 28.0% |
| MRPL14       | 64928  | 33.8% | 33.6% | 16.6% | 28.0% |
| DMWD         | 1762   | 24.2% | 22.1% | 37.8% | 28.0% |
| EXOC8        | 149371 | 26.3% | 30.0% | 27.7% | 28.0% |
| ARHGAP22     | 58504  | 32.2% | 27.2% | 24.7% | 28.0% |
| TRIM52       | 84851  | 36.2% | 26.5% | 21.3% | 28.0% |
| FLJ90036     | 255403 | 30.8% | 21.0% | 32.3% | 28.0% |
| DKFZP4341154 | 26100  | 27.8% | 18.6% | 37.7% | 28.0% |
| FLJ31882     | 146723 | 23.4% | 30.4% | 30.3% | 28.0% |
| ROM1         | 6094   | 36.0% | 20.2% | 27.8% | 28.0% |
| MAGEA2       | 4101   | 34.4% | 29.7% | 20.0% | 28.0% |
| ZNF595       | 152687 | 25.3% | 24.5% | 34.3% | 28.0% |
| KIAA1318     | 57529  | 24.6% | 30.0% | 29.5% | 28.0% |
| SLC39A13     | 91252  | 29.2% | 32.2% | 22.7% | 28.0% |
| HOXA13       | 3209   | 39.5% | 14.0% | 30.5% | 28.0% |
| FLJ23834     | 222256 | 43.7% | 27.2% | 13.1% | 28.0% |
| SMYD4        | 114826 | 31.3% | 25.1% | 27.6% | 28.0% |
| FLJ40160     | 128209 | 31.7% | 19.5% | 32.9% | 28.0% |
| ZNF607       | 84775  | 36.6% | 23.9% | 23.5% | 28.0% |
| PDE6D        | 5147   | 31.7% | 23.3% | 29.1% | 28.0% |
| KLHL12       | 59349  | 26.5% | 28.5% | 29.1% | 28.0% |
| EAF2         | 55840  | 34.4% | 23.2% | 26.5% | 28.0% |
| LECT2        | 3950   | 26.3% | 30.3% | 27.4% | 28.0% |
| ORSH14       | 403273 | 53.6% | 15.0% | 15.4% | 28.0% |
| TLR1         | 7096   | 27.5% | 34.8% | 21.8% | 28.0% |
| SLC38A4      | 55089  | 29.5% | 30.5% | 24.1% | 28.0% |
| OLFM2        | 93145  | 43.1% | 16.4% | 24.5% | 28.0% |
| ITLN1        | 55600  | 34.0% | 24.4% | 25.6% | 28.0% |
| MGC33365     | 205428 | 26.3% | 19.7% | 38.0% | 28.0% |
| NOXA1        | 10811  | 29.1% | 25.8% | 29.1% | 28.0% |
| SEC61A2      | 55176  | 34.4% | 28.8% | 20.8% | 28.0% |
| CKAP1        | 1155   | 35.8% | 24.1% | 24.2% | 28.0% |
| LAMP3        | 27074  | 36.6% | 25.0% | 22.4% | 28.0% |
| OR4K1        | 79544  | 34.5% | 27.2% | 22.4% | 28.0% |
| C9ORF37      | 85026  | 29.8% | 29.7% | 24.6% | 28.0% |
| ARL6IP       | 23204  | 34.7% | 9.0%  | 40.5% | 28.0% |
| VPS13D       | 55187  | 44.9% | 21.5% | 17.7% | 28.0% |
| FLJ20699     | 55020  | 24.6% | 23.3% | 36.2% | 28.0% |
| TESSP5       | 377047 | 36.6% | 22.2% | 25.3% | 28.0% |
| CD68         | 968    | 30.0% | 26.3% | 27.8% | 28.0% |
| ZAR1         | 326340 | 36.6% | 11.4% | 36.0% | 28.0% |
| LOC645922    | 645922 | 22.6% | 33.1% | 28.5% | 28.0% |
| FLJ13946     | 92104  | 33.0% | 11.7% | 39.4% | 28.0% |
| DNASE1L3     | 1776   | 23.2% | 29.8% | 31.2% | 28.0% |
| FLJ32926     | 93233  | 26.5% | 27.8% | 29.8% | 28.0% |
| CD8A         | 925    | 34.3% | 25.4% | 24.4% | 28.0% |
| IKBKAP       | 8518   | 21.6% | 34.6% | 27.9% | 28.0% |
| LOC346157    | 346157 | 32.2% | 25.2% | 26.7% | 28.0% |
| C1QL2        | 165257 | 41.8% | 22.7% | 19.5% | 28.0% |
| FLJ20605     | 54996  | 21.3% | 27.2% | 35.7% | 28.0% |
| LOC148137    | 148137 | 18.0% | 33.9% | 32.2% | 28.0% |
| ATP6V1C1     | 528    | 47.4% | 18.0% | 18.8% | 28.0% |
| MGC40107     | 254863 | 32.6% | 28.5% | 23.1% | 28.0% |
| DNM1         | 1759   | 31.4% | 29.0% | 23.7% | 28.0% |
| LMO1         | 4004   | 34.3% | 30.2% | 19.6% | 28.0% |
| IGFBP3       | 3486   | 26.5% | 28.9% | 28.7% | 28.0% |
| KLRA1        | 10748  | 33.3% | 23.3% | 27.5% | 28.0% |
| SLC1A4       | 6509   | 36.5% | 16.9% | 30.7% | 28.0% |
| PQLC2        | 54896  | 35.0% | 24.6% | 24.6% | 28.0% |
| CLDN15       | 24146  | 29.7% | 23.7% | 30.8% | 28.0% |
| KIAA1279     | 26128  | 34.4% | 28.5% | 21.2% | 28.0% |
| MAP1B        | 4131   | 23.4% | 23.9% | 36.9% | 28.0% |
| CHD7         | 55636  | 41.6% | 14.9% | 27.7% | 28.0% |
| ZSWIM3       | 140831 | 24.7% | 31.1% | 28.3% | 28.0% |
| ISLR         | 3671   | 25.8% | 32.9% | 25.4% | 28.0% |
| TMPPRS3      | 64699  | 38.4% | 21.4% | 24.4% | 28.0% |
| RTN4R        | 65078  | 36.6% | 21.4% | 26.2% | 28.1% |
| HSPA6        | 3310   | 39.4% | 20.9% | 23.9% | 28.1% |
| FLJ40125     | 147699 | 44.2% | 19.4% | 20.5% | 28.1% |
| TSPAN-2      | 10100  | 28.0% | 24.4% | 31.8% | 28.1% |
| GALNT11      | 63917  | 36.0% | 14.5% | 33.6% | 28.1% |
| PDE7B        | 27115  | 31.0% | 16.8% | 36.4% | 28.1% |
| THPO         | 7066   | 40.1% | 20.2% | 23.8% | 28.1% |
| RILP         | 83547  | 23.4% | 27.9% | 32.8% | 28.1% |
| C1ORF2       | 10712  | 26.2% | 25.8% | 32.2% | 28.1% |

|               |        |       |       |       |       |
|---------------|--------|-------|-------|-------|-------|
| ITGB1         | 3688   | 40.7% | 13.0% | 30.5% | 28.1% |
| CENPA         | 1058   | 34.4% | 24.9% | 24.9% | 28.1% |
| MAGEL2        | 54551  | 33.3% | 26.6% | 24.2% | 28.1% |
| SRP72         | 6731   | 24.0% | 29.5% | 30.6% | 28.1% |
| GCLC          | 2729   | 21.2% | 27.8% | 35.3% | 28.1% |
| CDT1          | 81620  | 46.9% | 19.2% | 18.1% | 28.1% |
| PRDM7         | 11105  | 26.5% | 32.5% | 25.3% | 28.1% |
| HRK           | 8739   | 27.3% | 26.3% | 30.7% | 28.1% |
| MGC27466      | 127396 | 24.0% | 20.4% | 39.9% | 28.1% |
| PDF           | 64146  | 35.0% | 18.2% | 30.9% | 28.1% |
| PTPRG         | 5793   | 25.7% | 34.9% | 23.7% | 28.1% |
| SPEG          | 10290  | 24.9% | 30.8% | 28.6% | 28.1% |
| CKIP-1        | 51177  | 25.5% | 22.5% | 36.3% | 28.1% |
| PORIMIN       | 114908 | 30.2% | 18.8% | 35.3% | 28.1% |
| YES1          | 7525   | 33.7% | 18.8% | 31.7% | 28.1% |
| EGLN1         | 54583  | 30.8% | 25.0% | 28.4% | 28.1% |
| WFDC2         | 10406  | 27.0% | 36.5% | 20.7% | 28.1% |
| ORSB21        | 219968 | 37.7% | 23.8% | 22.8% | 28.1% |
| MEF2B         | 4207   | 31.7% | 28.8% | 23.7% | 28.1% |
| CLASP2        | 23122  | 25.6% | 26.0% | 32.6% | 28.1% |
| HIST1H4E      | 8367   | 38.6% | 15.9% | 29.8% | 28.1% |
| CNDP1         | 84735  | 31.2% | 31.3% | 21.8% | 28.1% |
| ARHGAP19      | 84986  | 42.9% | 18.3% | 23.1% | 28.1% |
| BAT3          | 7917   | 33.9% | 20.4% | 30.0% | 28.1% |
| SLC38A5       | 92745  | 43.8% | 21.8% | 18.8% | 28.1% |
| CCL1          | 6346   | 42.6% | 18.9% | 22.7% | 28.1% |
| DND1          | 373863 | 30.5% | 21.9% | 31.9% | 28.1% |
| BUB1B         | 701    | 28.7% | 31.6% | 24.0% | 28.1% |
| C9ORF18       | 254956 | 36.8% | 17.1% | 30.4% | 28.1% |
| NALP13        | 126204 | 37.6% | 23.6% | 23.1% | 28.1% |
| PACSIN3       | 29763  | 35.9% | 24.6% | 23.8% | 28.1% |
| GREM1         | 26585  | 40.7% | 22.3% | 21.3% | 28.1% |
| LOC149830     | 149830 | 23.5% | 22.2% | 38.6% | 28.1% |
| GRIN3A        | 116443 | 29.3% | 24.7% | 30.3% | 28.1% |
| GA17          | 10480  | 24.3% | 17.9% | 42.0% | 28.1% |
| RGPD7         | 652919 | 22.9% | 28.7% | 32.7% | 28.1% |
| XRCC3         | 7517   | 35.5% | 26.4% | 22.4% | 28.1% |
| LOC392395     | 392395 | 23.9% | 29.3% | 31.1% | 28.1% |
| FLJ38482      | 201931 | 33.3% | 28.8% | 22.1% | 28.1% |
| CASP8         | 841    | 37.7% | 26.9% | 19.8% | 28.1% |
| KIAA0323      | 23351  | 35.6% | 23.2% | 25.6% | 28.1% |
| TUBB8-PENDING | 347688 | 33.9% | 22.4% | 28.0% | 28.1% |
| CBL           | 867    | 29.1% | 25.9% | 29.4% | 28.1% |
| HSPA4         | 3308   | 38.5% | 22.1% | 23.7% | 28.1% |
| PIK3CB        | 5291   | 24.1% | 36.8% | 23.4% | 28.1% |
| FOXQ1         | 94234  | 40.0% | 20.1% | 24.2% | 28.1% |
| CAD           | 790    | 31.3% | 26.4% | 26.7% | 28.1% |
| TIMP3         | 7078   | 34.5% | 26.5% | 23.3% | 28.1% |
| PEG10         | 23089  | 35.8% | 32.4% | 16.2% | 28.1% |
| FLJ37451      | 284161 | 15.3% | 28.8% | 40.2% | 28.1% |
| RQCD1         | 9125   | 28.3% | 27.6% | 28.5% | 28.1% |
| VPS18         | 57617  | 30.0% | 28.4% | 25.9% | 28.1% |
| PCDHGA10      | 56106  | 46.9% | 16.6% | 20.9% | 28.1% |
| THRAP3        | 9967   | 39.7% | 14.9% | 29.8% | 28.1% |
| G6ORF97       | 80129  | 38.1% | 20.0% | 26.3% | 28.1% |
| LOC339745     | 339745 | 33.3% | 35.6% | 15.4% | 28.1% |
| FLJ22965      | 63932  | 26.5% | 26.1% | 31.8% | 28.1% |
| FLJ35767      | 400629 | 28.9% | 35.4% | 20.1% | 28.1% |
| ED1           | 1896   | 24.1% | 31.2% | 29.1% | 28.1% |
| CUEDC2        | 79004  | 37.9% | 18.5% | 27.9% | 28.1% |
| CCT7          | 10574  | 30.3% | 27.9% | 26.2% | 28.1% |
| ASCL4         | 121549 | 25.0% | 39.7% | 19.7% | 28.1% |
| C14ORF106     | 55320  | 24.1% | 28.1% | 32.2% | 28.1% |
| HTCD37        | 58497  | 32.0% | 26.4% | 26.1% | 28.1% |
| DVL2          | 1856   | 45.8% | 19.1% | 19.5% | 28.1% |
| MGC13138      | 92595  | 47.7% | 10.0% | 26.7% | 28.1% |
| FKBP8         | 23770  | 37.3% | 28.0% | 19.1% | 28.1% |
| FEM1C         | 56929  | 31.2% | 24.6% | 28.6% | 28.1% |
| TIGD1         | 200765 | 20.3% | 33.8% | 30.3% | 28.1% |
| C7ORF19       | 80228  | 22.6% | 27.4% | 34.4% | 28.1% |
| RER1          | 11079  | 46.5% | 22.9% | 15.0% | 28.1% |
| HMGB3         | 3149   | 37.5% | 17.5% | 29.4% | 28.1% |
| SPATA1        | 64173  | 30.1% | 22.7% | 31.6% | 28.1% |
| UBE2M         | 9040   | 34.2% | 23.1% | 27.1% | 28.1% |
| DSC2          | 1824   | 41.4% | 17.8% | 25.3% | 28.1% |
| ZNF195        | 7748   | 36.0% | 21.7% | 26.7% | 28.1% |
| HRSF12        | 10247  | 36.1% | 31.9% | 16.4% | 28.1% |
| FLJ10094      | 55068  | 17.5% | 35.9% | 31.0% | 28.1% |
| MGC45873      | 148398 | 32.1% | 17.4% | 34.9% | 28.1% |
| AQP1          | 358    | 37.9% | 29.8% | 16.8% | 28.1% |
| RPS2          | 6187   | 26.0% | 28.4% | 30.1% | 28.1% |
| BCAS1         | 8537   | 40.4% | 32.7% | 11.4% | 28.1% |
| DKFZP586M1819 | 137964 | 37.6% | 19.3% | 27.6% | 28.1% |
| TTBK2         | 146057 | 30.5% | 27.4% | 26.6% | 28.2% |
| NUDT6         | 11162  | 30.7% | 31.6% | 22.1% | 28.2% |
| RAB15         | 376267 | 34.7% | 27.6% | 22.1% | 28.2% |
| KIAA1244      | 57221  | 16.1% | 27.2% | 41.2% | 28.2% |
| UNQ5792       | 387836 | 24.3% | 35.4% | 24.8% | 28.2% |
| METTL4        | 64863  | 44.7% | 23.1% | 16.6% | 28.2% |
| QDPR          | 5860   | 27.5% | 28.9% | 28.1% | 28.2% |
| CLCA4         | 22802  | 31.7% | 23.8% | 29.0% | 28.2% |
| OTOS          | 150677 | 36.9% | 32.1% | 15.5% | 28.2% |
| G6ORF51       | 112495 | 42.4% | 26.4% | 15.7% | 28.2% |
| NPS           | 594857 | 35.3% | 28.0% | 21.2% | 28.2% |
| MYCBP2        | 23077  | 35.0% | 23.7% | 25.7% | 28.2% |
| CAPNS1        | 826    | 33.1% | 32.1% | 19.4% | 28.2% |
| SPARCL1       | 8404   | 40.2% | 23.5% | 20.8% | 28.2% |
| HSMPP8        | 54737  | 34.2% | 22.0% | 28.3% | 28.2% |

|           |        |       |       |       |       |
|-----------|--------|-------|-------|-------|-------|
| CNOT2     | 4848   | 37.3% | 20.2% | 27.0% | 28.2% |
| DEAF1     | 10522  | 30.0% | 26.3% | 28.2% | 28.2% |
| FABP2     | 2169   | 36.9% | 23.4% | 24.2% | 28.2% |
| PCDH816   | 57717  | 44.0% | 19.1% | 21.4% | 28.2% |
| ANKS1     | 23294  | 18.7% | 29.6% | 36.2% | 28.2% |
| ABL2      | 27     | 27.6% | 27.6% | 29.4% | 28.2% |
| CDH13     | 1012   | 34.7% | 30.9% | 18.9% | 28.2% |
| ZNF12     | 7559   | 35.7% | 19.4% | 29.5% | 28.2% |
| PLA2G5    | 5322   | 32.8% | 18.5% | 33.2% | 28.2% |
| C7ORF23   | 79161  | 35.7% | 17.5% | 31.3% | 28.2% |
| CPVL      | 54504  | 27.0% | 25.8% | 31.8% | 28.2% |
| SLC35F2   | 54733  | 33.6% | 25.3% | 25.6% | 28.2% |
| SERPINA7  | 6906   | 41.1% | 26.3% | 17.2% | 28.2% |
| TRIAD3    | 54476  | 32.0% | 24.9% | 27.7% | 28.2% |
| C20ORF177 | 63939  | 36.0% | 24.0% | 24.6% | 28.2% |
| FLJ22609  | 63899  | 27.1% | 23.7% | 33.8% | 28.2% |
| RIMS1     | 22999  | 37.6% | 22.8% | 24.1% | 28.2% |
| RELB      | 5971   | 24.4% | 37.4% | 22.8% | 28.2% |
| UBE2D4    | 51619  | 31.7% | 26.0% | 26.9% | 28.2% |
| BCHE      | 590    | 31.6% | 30.7% | 22.3% | 28.2% |
| CBS       | 875    | 35.6% | 27.6% | 21.4% | 28.2% |
| FARSLB    | 10056  | 46.9% | 13.3% | 24.3% | 28.2% |
| FLJ36119  | 254173 | 25.7% | 23.1% | 35.8% | 28.2% |
| MPP5      | 64398  | 31.8% | 21.4% | 31.4% | 28.2% |
| PDAP1     | 11333  | 32.0% | 33.9% | 18.7% | 28.2% |
| ALDH9A1   | 223    | 40.0% | 22.3% | 22.3% | 28.2% |
| MIDN      | 90007  | 36.7% | 17.2% | 30.7% | 28.2% |
| CLDN20    | 49861  | 39.4% | 19.4% | 25.8% | 28.2% |
| CHCHD2    | 51142  | 34.6% | 21.3% | 28.7% | 28.2% |
| SLC12A5   | 57468  | 36.9% | 22.4% | 25.2% | 28.2% |
| SYNPR     | 132204 | 31.3% | 29.5% | 23.9% | 28.2% |
| CDKN2A    | 1029   | 36.6% | 24.5% | 23.6% | 28.2% |
| MGC15887  | 375061 | 22.5% | 27.6% | 34.6% | 28.2% |
| MACF1     | 23499  | 24.8% | 27.9% | 31.9% | 28.2% |
| PRPSAP2   | 5636   | 33.8% | 29.4% | 21.5% | 28.2% |
| FGA       | 2243   | 26.4% | 30.0% | 28.2% | 28.2% |
| PRCP      | 5547   | 32.8% | 23.2% | 28.6% | 28.2% |
| ZFP36L2   | 678    | 31.6% | 24.2% | 28.8% | 28.2% |
| KIAA0056  | 23310  | 27.0% | 15.6% | 42.0% | 28.2% |
| GSPT2     | 23708  | 54.3% | 16.1% | 14.2% | 28.2% |
| NIPSNAP3A | 25934  | 31.0% | 23.8% | 29.9% | 28.2% |
| C21ORF123 | 378832 | 23.5% | 32.0% | 29.1% | 28.2% |
| OR5C1     | 392391 | 45.6% | 25.6% | 13.4% | 28.2% |
| SLC16A2   | 6567   | 29.8% | 20.6% | 34.2% | 28.2% |
| DLG3      | 1741   | 28.2% | 20.0% | 36.5% | 28.2% |
| LOC285193 | 285193 | 25.0% | 25.5% | 34.1% | 28.2% |
| BAZ2B     | 29994  | 37.2% | 24.3% | 23.2% | 28.2% |
| MGC33962  | 148014 | 13.6% | 36.7% | 34.3% | 28.2% |
| ZNF613    | 79898  | 28.8% | 24.5% | 31.4% | 28.2% |
| EIF4EBP2  | 1979   | 42.3% | 15.0% | 27.3% | 28.2% |
| MLF2      | 8079   | 45.6% | 17.8% | 21.2% | 28.2% |
| SSX2IP    | 117178 | 37.0% | 24.4% | 23.3% | 28.2% |
| LOC400793 | 400793 | 26.9% | 25.8% | 32.0% | 28.2% |
| LOC652859 | 652859 | 31.1% | 25.8% | 27.8% | 28.2% |
| FLJ10761  | 55224  | 27.8% | 26.2% | 30.7% | 28.2% |
| EGR1      | 1958   | 38.5% | 25.2% | 21.0% | 28.2% |
| HSH2D     | 84941  | 32.1% | 27.7% | 24.8% | 28.2% |
| SRM       | 6723   | 35.2% | 30.9% | 18.5% | 28.2% |
| TBC1D5    | 9779   | 43.6% | 18.4% | 22.7% | 28.2% |
| GRIN1     | 2902   | 40.0% | 6.8%  | 37.9% | 28.2% |
| ASB6      | 140459 | 37.3% | 24.4% | 23.1% | 28.2% |
| UNQ755    | 643866 | 30.7% | 18.8% | 35.3% | 28.2% |
| HRAS      | 3265   | 29.3% | 25.5% | 30.0% | 28.2% |
| TMEM9     | 252839 | 31.0% | 22.9% | 30.8% | 28.2% |
| NPHP3     | 27031  | 34.1% | 27.5% | 23.1% | 28.2% |
| COPG2     | 26958  | 32.3% | 29.3% | 23.1% | 28.2% |
| ATP6V1D   | 51382  | 31.6% | 25.9% | 27.1% | 28.2% |
| TEF       | 7008   | 31.4% | 22.0% | 31.4% | 28.2% |
| NYD-SP25  | 89882  | 27.6% | 26.0% | 31.1% | 28.2% |
| SH3MD1    | 9644   | 26.6% | 28.6% | 29.6% | 28.2% |
| KIAA1387  | 57223  | 26.4% | 25.8% | 32.5% | 28.2% |
| OR10AD1   | 121275 | 31.1% | 31.6% | 21.9% | 28.2% |
| LY6G5C    | 80741  | 35.4% | 29.4% | 19.9% | 28.2% |
| NS3TP1    | 54529  | 35.2% | 28.3% | 21.2% | 28.2% |
| ITGA6     | 3655   | 31.3% | 34.4% | 19.0% | 28.2% |
| FLJ10970  | 55273  | 25.7% | 33.3% | 25.7% | 28.2% |
| GLI4      | 2738   | 38.5% | 23.9% | 22.3% | 28.2% |
| MYNN      | 55892  | 33.2% | 30.2% | 21.4% | 28.2% |
| PWDMP     | 57728  | 36.2% | 24.1% | 24.5% | 28.3% |
| SLCO1C1   | 53919  | 36.6% | 20.0% | 28.2% | 28.3% |
| NDST2     | 8509   | 31.3% | 34.6% | 18.9% | 28.3% |
| FGF11     | 2256   | 28.9% | 23.1% | 32.7% | 28.3% |
| MSI1      | 4440   | 38.3% | 12.2% | 34.3% | 28.3% |
| HSPB6     | 126393 | 35.9% | 21.6% | 27.3% | 28.3% |
| RANBP2    | 5903   | 43.5% | 18.0% | 23.3% | 28.3% |
| OR116     | 392390 | 21.8% | 28.8% | 34.2% | 28.3% |
| HDAC3     | 8841   | 48.4% | 17.5% | 18.9% | 28.3% |
| KIF12     | 113220 | 29.5% | 29.6% | 25.7% | 28.3% |
| RG9MTD2   | 93587  | 33.1% | 30.5% | 21.1% | 28.3% |
| FBLN5     | 10516  | 27.3% | 30.4% | 27.1% | 28.3% |
| ABCA8     | 10351  | 38.7% | 21.1% | 25.0% | 28.3% |
| OR4A15    | 81328  | 31.3% | 29.4% | 24.2% | 28.3% |
| MGC19780  | 199857 | 29.7% | 25.1% | 30.0% | 28.3% |
| LOC349136 | 349136 | 29.1% | 22.9% | 32.8% | 28.3% |
| EXO1      | 9156   | 37.3% | 28.6% | 18.9% | 28.3% |
| RRBP1     | 6238   | 27.3% | 26.1% | 31.5% | 28.3% |
| NRXN2     | 9379   | 32.3% | 28.0% | 24.5% | 28.3% |
| DAZ4      | 57135  | 35.0% | 31.9% | 17.9% | 28.3% |

|               |        |       |       |       |       |
|---------------|--------|-------|-------|-------|-------|
| ZNF497        | 162968 | 27.3% | 24.3% | 33.2% | 28.3% |
| GDA           | 9615   | 29.3% | 23.9% | 31.7% | 28.3% |
| RGMB          | 285704 | 39.2% | 13.1% | 32.6% | 28.3% |
| FGFR4         | 2264   | 15.2% | 27.6% | 42.0% | 28.3% |
| MGC4825       | 79135  | 28.0% | 28.1% | 28.7% | 28.3% |
| MFGE8         | 4240   | 29.0% | 25.0% | 30.8% | 28.3% |
| TWIST1        | 7291   | 31.6% | 23.5% | 29.7% | 28.3% |
| ARRDC3        | 57561  | 26.9% | 33.2% | 24.7% | 28.3% |
| ZNF239        | 8187   | 26.3% | 29.3% | 29.2% | 28.3% |
| MGC26816      | 164684 | 25.4% | 25.6% | 33.8% | 28.3% |
| LOC57228      | 57228  | 30.8% | 27.3% | 26.7% | 28.3% |
| SPIN-2        | 474343 | 21.2% | 26.9% | 36.8% | 28.3% |
| DKFZP564O0463 | 25879  | 33.9% | 21.4% | 29.5% | 28.3% |
| GNE           | 10020  | 21.6% | 29.7% | 33.5% | 28.3% |
| GBGT1         | 26301  | 40.0% | 24.9% | 20.0% | 28.3% |
| BRD8          | 10902  | 32.4% | 22.6% | 29.8% | 28.3% |
| ZWILCH        | 55055  | 40.1% | 23.8% | 21.0% | 28.3% |
| FLJ31153      | 123811 | 21.1% | 25.9% | 37.9% | 28.3% |
| IL6R          | 3570   | 28.6% | 26.4% | 29.9% | 28.3% |
| ZNRF3         | 84133  | 34.7% | 21.0% | 29.2% | 28.3% |
| STMN4         | 81551  | 36.6% | 18.2% | 30.0% | 28.3% |
| FUBP3         | 8939   | 41.4% | 17.9% | 25.5% | 28.3% |
| PGBD1         | 84547  | 29.9% | 25.9% | 29.1% | 28.3% |
| TLT4          | 285852 | 30.2% | 24.7% | 30.1% | 28.3% |
| ORC4L         | 5000   | 29.4% | 27.9% | 27.6% | 28.3% |
| UPP1          | 7378   | 30.4% | 28.4% | 26.1% | 28.3% |
| FGFR10P       | 11116  | 40.9% | 20.7% | 23.4% | 28.3% |
| C10ORF49      | 221044 | 37.3% | 21.6% | 26.1% | 28.3% |
| LOC92162      | 92162  | 29.4% | 25.0% | 30.6% | 28.3% |
| UBQLN1        | 29979  | 24.4% | 30.4% | 30.2% | 28.3% |
| CNTNAP5       | 129684 | 34.4% | 17.5% | 33.0% | 28.3% |
| DKFZP564I1922 | 25878  | 16.4% | 11.3% | 57.2% | 28.3% |
| KRT1B         | 374454 | 23.8% | 24.5% | 36.6% | 28.3% |
| FLJ45717      | 388759 | 37.9% | 21.1% | 26.0% | 28.3% |
| SLC25A1       | 6576   | 40.4% | 10.8% | 33.8% | 28.3% |
| CSN1S1        | 1446   | 27.8% | 23.0% | 34.2% | 28.3% |
| LOC149297     | 149297 | 33.1% | 26.5% | 25.4% | 28.3% |
| TXNRD3        | 114112 | 37.1% | 25.1% | 22.7% | 28.3% |
| CLDN2         | 9075   | 37.7% | 27.7% | 19.6% | 28.3% |
| PSME3         | 10197  | 42.3% | 27.3% | 15.4% | 28.3% |
| SSBP2         | 23635  | 22.9% | 37.2% | 24.9% | 28.3% |
| ACRC          | 93953  | 28.2% | 26.8% | 30.0% | 28.3% |
| PSORS1C1      | 170679 | 27.8% | 32.5% | 24.6% | 28.3% |
| OTOP1         | 133060 | 33.5% | 23.7% | 27.7% | 28.3% |
| LDB1          | 8861   | 30.9% | 30.3% | 23.7% | 28.3% |
| LHX1          | 3975   | 34.0% | 30.5% | 20.6% | 28.3% |
| TXNDC         | 81542  | 38.1% | 20.6% | 26.4% | 28.3% |
| IL15          | 3600   | 28.1% | 28.4% | 28.5% | 28.3% |
| GIMAP1        | 170575 | 25.8% | 26.9% | 32.3% | 28.3% |
| MRPS6         | 64968  | 25.4% | 24.3% | 35.3% | 28.3% |
| GADD45G       | 10912  | 33.6% | 28.9% | 22.5% | 28.3% |
| DKFZP434M0331 | 55592  | 23.1% | 24.3% | 37.6% | 28.3% |
| FLJ90165      | 124975 | 29.3% | 27.2% | 28.5% | 28.3% |
| CDK5R2        | 8941   | 19.6% | 27.5% | 37.9% | 28.3% |
| ASXL1         | 171023 | 24.9% | 32.3% | 27.8% | 28.3% |
| ACP1          | 52     | 31.0% | 34.2% | 19.9% | 28.3% |
| EHMT2         | 10919  | 40.2% | 25.0% | 19.9% | 28.3% |
| C7ORF2        | 64327  | 27.6% | 21.0% | 36.5% | 28.3% |
| ADAM28        | 10863  | 34.6% | 34.2% | 16.3% | 28.3% |
| ASAH3         | 125981 | 30.5% | 35.0% | 19.5% | 28.3% |
| C14ORF159     | 80017  | 26.8% | 30.9% | 27.3% | 28.3% |
| NCK1          | 4690   | 39.6% | 18.7% | 26.7% | 28.3% |
| LOC162073     | 162073 | 24.0% | 26.3% | 34.7% | 28.3% |
| ARHN          | 8153   | 27.5% | 30.0% | 27.5% | 28.3% |
| MGC29891      | 126626 | 41.6% | 17.2% | 26.2% | 28.3% |
| LOC126669     | 126669 | 27.2% | 26.4% | 31.4% | 28.3% |
| ATP6V1B1      | 525    | 34.6% | 8.0%  | 42.4% | 28.3% |
| SNX26         | 115703 | 37.3% | 25.0% | 22.8% | 28.3% |
| MEN1          | 4221   | 34.0% | 29.4% | 21.7% | 28.4% |
| CHST3         | 9469   | 29.1% | 30.2% | 25.8% | 28.4% |
| ABLIM3        | 22885  | 29.5% | 31.9% | 23.7% | 28.4% |
| DUSP6         | 1848   | 34.7% | 27.8% | 22.5% | 28.4% |
| KIAA0643      | 23059  | 32.5% | 17.2% | 35.4% | 28.4% |
| PRTFDC1       | 56952  | 35.0% | 29.6% | 20.4% | 28.4% |
| MGC31967      | 203260 | 26.3% | 22.6% | 36.2% | 28.4% |
| CD1B          | 910    | 29.3% | 25.0% | 30.7% | 28.4% |
| FLJ36812      | 255252 | 29.5% | 18.9% | 36.7% | 28.4% |
| GRP58         | 2923   | 35.5% | 27.5% | 22.1% | 28.4% |
| FTO           | 79068  | 39.9% | 26.0% | 19.1% | 28.4% |
| EIF1AY        | 9086   | 37.6% | 17.2% | 30.2% | 28.4% |
| PABPC3        | 5042   | 29.5% | 24.8% | 30.8% | 28.4% |
| HOP           | 84525  | 18.2% | 25.9% | 41.0% | 28.4% |
| COL17A1       | 1308   | 40.6% | 17.4% | 27.0% | 28.4% |
| LY96          | 23643  | 33.3% | 30.1% | 21.7% | 28.4% |
| NIPSNAP3B     | 55335  | 36.0% | 26.3% | 22.8% | 28.4% |
| SPTBN5        | 51332  | 38.5% | 16.4% | 30.2% | 28.4% |
| LTBP4         | 8425   | 32.3% | 27.0% | 25.9% | 28.4% |
| OR2A12        | 346525 | 31.5% | 22.1% | 31.5% | 28.4% |
| OR6C74        | 254783 | 27.2% | 30.6% | 27.3% | 28.4% |
| RAB3A         | 5864   | 29.4% | 35.9% | 19.8% | 28.4% |
| FLJ39779      | 400223 | 28.7% | 24.9% | 31.5% | 28.4% |
| LOC150383     | 150383 | 46.4% | 18.9% | 19.8% | 28.4% |
| LOC91526      | 91526  | 32.6% | 25.5% | 27.1% | 28.4% |
| PRPF4         | 9128   | 35.9% | 32.1% | 17.2% | 28.4% |
| NANOS1        | 340719 | 38.0% | 19.8% | 27.3% | 28.4% |
| SLC15A4       | 121260 | 34.0% | 22.4% | 28.8% | 28.4% |
| DEFB106B      | 503841 | 38.4% | 26.0% | 20.8% | 28.4% |
| HRMT1L3       | 10196  | 38.8% | 21.0% | 25.4% | 28.4% |

|               |           |       |       |       |       |
|---------------|-----------|-------|-------|-------|-------|
| BRDT          | 676       | 36.9% | 26.5% | 21.8% | 28.4% |
| CHST4         | 10164     | 27.0% | 22.6% | 35.6% | 28.4% |
| FLJ21820      | 60526     | 26.3% | 27.8% | 31.1% | 28.4% |
| POLE          | 5426      | 29.8% | 20.8% | 34.5% | 28.4% |
| LOC338809     | 338809    | 43.2% | 28.7% | 13.3% | 28.4% |
| TBX20         | 57057     | 27.1% | 33.5% | 24.5% | 28.4% |
| LOC92305      | 92305     | 21.3% | 29.6% | 34.3% | 28.4% |
| ACVR2         | 92        | 25.4% | 24.6% | 35.1% | 28.4% |
| NR1I3         | 9970      | 32.5% | 31.8% | 20.9% | 28.4% |
| SELL          | 6402      | 32.7% | 24.6% | 27.8% | 28.4% |
| USP28         | 57646     | 32.9% | 21.6% | 30.7% | 28.4% |
| ELOVL2        | 54898     | 38.4% | 21.0% | 25.8% | 28.4% |
| KIAA1333      | 55632     | 36.5% | 22.8% | 25.9% | 28.4% |
| CNKS3         | 154043    | 41.5% | 14.3% | 29.4% | 28.4% |
| CWF19L1       | 55280     | 41.7% | 16.3% | 27.2% | 28.4% |
| LOC150084     | 150084    | 31.3% | 23.3% | 30.6% | 28.4% |
| GATA4         | 2626      | 40.7% | 25.6% | 18.8% | 28.4% |
| bA9F1.1       | 255349    | 33.1% | 31.6% | 20.5% | 28.4% |
| HUNK          | 30811     | 35.2% | 28.9% | 21.1% | 28.4% |
| CENTG1        | 116986    | 40.2% | 20.3% | 24.6% | 28.4% |
| CPT1A         | 1374      | 23.5% | 26.1% | 35.6% | 28.4% |
| TNF3IP1       | 7126      | 26.1% | 23.6% | 35.5% | 28.4% |
| ZNF138        | 7697      | 35.2% | 22.0% | 28.0% | 28.4% |
| RTN3          | 10313     | 23.2% | 35.0% | 27.0% | 28.4% |
| EIF5          | 1983      | 44.4% | 16.0% | 24.8% | 28.4% |
| KRT25A        | 147183    | 22.6% | 23.1% | 39.5% | 28.4% |
| PTGIR         | 5739      | 29.5% | 29.6% | 26.1% | 28.4% |
| NR1H3         | 10062     | 36.6% | 24.2% | 24.4% | 28.4% |
| HLA-DOA       | 3111      | 29.6% | 23.7% | 32.0% | 28.4% |
| MGC51082      | 126299    | 22.6% | 29.5% | 33.2% | 28.4% |
| LMO2          | 4005      | 31.7% | 26.4% | 27.1% | 28.4% |
| OR2T4         | 127074    | 41.8% | 23.4% | 20.1% | 28.4% |
| MGC27016      | 166863    | 33.5% | 18.6% | 33.1% | 28.4% |
| TRIF          | 148022    | 26.1% | 27.2% | 32.0% | 28.4% |
| FLJ35834      | 154865    | 26.9% | 19.0% | 39.3% | 28.4% |
| IPF1          | 3651      | 33.2% | 33.0% | 19.1% | 28.4% |
| HGC6.3        | 100128124 | 29.0% | 29.2% | 27.1% | 28.4% |
| TBX21         | 30009     | 35.5% | 23.0% | 26.7% | 28.4% |
| SLC39A14      | 23516     | 33.7% | 25.0% | 26.6% | 28.4% |
| GNGT1         | 2792      | 36.8% | 20.5% | 28.0% | 28.4% |
| FLJ36492      | 284047    | 40.7% | 17.8% | 26.7% | 28.4% |
| GMMP2         | 51292     | 39.3% | 24.0% | 21.9% | 28.4% |
| BTBD8         | 284697    | 32.1% | 20.1% | 33.1% | 28.4% |
| AP1G2         | 8906      | 18.6% | 27.1% | 39.6% | 28.4% |
| IMP-3         | 10643     | 23.7% | 21.5% | 40.1% | 28.4% |
| FLJ30678      | 139324    | 30.4% | 21.8% | 33.1% | 28.4% |
| GCC1          | 79571     | 43.1% | 26.9% | 15.3% | 28.4% |
| SLC14A1       | 6563      | 33.3% | 25.8% | 26.2% | 28.4% |
| JOSD1         | 9929      | 26.4% | 24.9% | 34.1% | 28.4% |
| MRPL16        | 54948     | 41.7% | 12.8% | 30.8% | 28.4% |
| HS3ST4        | 9951      | 27.1% | 31.0% | 27.2% | 28.4% |
| APBP2         | 10513     | 25.7% | 23.1% | 36.4% | 28.4% |
| OC90          | 729330    | 32.5% | 19.3% | 33.5% | 28.4% |
| NLGN1         | 22871     | 43.7% | 23.2% | 18.5% | 28.4% |
| C9ORF65       | 158471    | 27.6% | 23.0% | 34.7% | 28.4% |
| PCDH7         | 5099      | 43.3% | 22.9% | 19.2% | 28.4% |
| SH3PX3        | 257364    | 37.7% | 31.7% | 15.9% | 28.4% |
| FLJ45224      | 401562    | 33.9% | 25.8% | 25.7% | 28.4% |
| LOC553158     | 553158    | 25.5% | 23.4% | 36.4% | 28.4% |
| SUOX          | 6821      | 30.4% | 25.3% | 29.6% | 28.4% |
| NUCKS         | 64710     | 20.1% | 35.6% | 29.6% | 28.4% |
| HNLF          | 222068    | 28.2% | 31.3% | 25.8% | 28.4% |
| GLUD1         | 2746      | 45.2% | 15.2% | 24.9% | 28.4% |
| MEP1A         | 4224      | 26.8% | 31.6% | 27.0% | 28.5% |
| SERP1B3       | 5275      | 33.0% | 30.4% | 22.0% | 28.5% |
| PYCS          | 5832      | 42.9% | 12.5% | 30.0% | 28.5% |
| IQGAP1        | 8826      | 27.2% | 27.1% | 31.1% | 28.5% |
| LOC124751     | 124751    | 25.2% | 20.3% | 39.9% | 28.5% |
| CDV-1         | 28981     | 23.8% | 32.8% | 28.8% | 28.5% |
| CYSLTR2       | 57105     | 23.8% | 32.1% | 29.5% | 28.5% |
| FLJ36046      | 164592    | 20.0% | 15.4% | 50.0% | 28.5% |
| DUSP23        | 54935     | 44.0% | 23.2% | 18.2% | 28.5% |
| GRAP2         | 9402      | 42.4% | 15.6% | 27.4% | 28.5% |
| EPB41L4B      | 54566     | 33.3% | 26.2% | 25.8% | 28.5% |
| PRKAR1B       | 5575      | 33.6% | 25.1% | 26.7% | 28.5% |
| FCRH1         | 115350    | 29.3% | 23.5% | 32.6% | 28.5% |
| DKFZP434O0527 | 255101    | 26.6% | 24.1% | 34.8% | 28.5% |
| ADH6          | 130       | 38.1% | 20.5% | 26.8% | 28.5% |
| PIWIL4        | 143689    | 36.9% | 24.4% | 24.1% | 28.5% |
| UBE2G2        | 7327      | 34.1% | 24.5% | 26.7% | 28.5% |
| WDR24         | 84219     | 31.2% | 31.0% | 23.2% | 28.5% |
| DFNA5         | 1687      | 36.6% | 17.9% | 30.9% | 28.5% |
| AMPH          | 273       | 28.1% | 26.0% | 31.3% | 28.5% |
| LOC56920      | 56920     | 28.0% | 31.1% | 26.3% | 28.5% |
| FLJ16231      | 388561    | 33.0% | 25.1% | 27.3% | 28.5% |
| MRPS15        | 64960     | 38.2% | 25.7% | 21.5% | 28.5% |
| LIG4          | 3981      | 40.2% | 20.3% | 25.0% | 28.5% |
| FLJ12610      | 79840     | 40.7% | 19.6% | 25.2% | 28.5% |
| LHX3          | 8022      | 38.9% | 24.5% | 22.0% | 28.5% |
| C16ORF44      | 79786     | 35.7% | 20.0% | 29.7% | 28.5% |
| SLC22A2       | 6582      | 35.0% | 28.6% | 21.8% | 28.5% |
| RAI2          | 10742     | 37.3% | 20.7% | 27.5% | 28.5% |
| CAPN7         | 23473     | 33.6% | 22.3% | 29.6% | 28.5% |
| RBM12         | 10137     | 44.2% | 10.4% | 30.9% | 28.5% |
| FUSIP1        | 10772     | 26.8% | 30.2% | 28.5% | 28.5% |
| ACDC          | 9370      | 28.2% | 20.2% | 37.1% | 28.5% |
| SLC2A13       | 114134    | 35.3% | 28.3% | 21.9% | 28.5% |
| EXOSC4        | 54512     | 43.1% | 22.4% | 20.0% | 28.5% |

|           |        |       |       |       |       |
|-----------|--------|-------|-------|-------|-------|
| TNKS      | 8658   | 39.1% | 17.3% | 29.0% | 28.5% |
| PRSS11    | 5654   | 28.8% | 39.1% | 17.6% | 28.5% |
| METT12    | 55798  | 37.1% | 22.4% | 26.0% | 28.5% |
| OR7A5     | 26659  | 40.2% | 25.3% | 19.9% | 28.5% |
| PAQR3     | 152559 | 34.1% | 23.4% | 28.0% | 28.5% |
| CLPS      | 1208   | 28.6% | 24.2% | 32.7% | 28.5% |
| LPHN1     | 22859  | 29.5% | 31.4% | 24.6% | 28.5% |
| PSMB8     | 5696   | 29.9% | 27.0% | 28.6% | 28.5% |
| MGC16028  | 112752 | 24.5% | 28.7% | 32.3% | 28.5% |
| RNF125    | 54941  | 35.9% | 26.2% | 23.4% | 28.5% |
| MYL9      | 10398  | 43.2% | 22.5% | 19.8% | 28.5% |
| KBTBD5    | 131377 | 23.2% | 32.0% | 30.3% | 28.5% |
| STAG1     | 10274  | 39.4% | 25.3% | 20.8% | 28.5% |
| TARS      | 6897   | 28.5% | 25.9% | 31.1% | 28.5% |
| MAGEE2    | 139599 | 39.9% | 17.4% | 28.2% | 28.5% |
| SLC4A1    | 6521   | 26.6% | 28.1% | 30.8% | 28.5% |
| HLA-DQA2  | 3118   | 37.3% | 22.3% | 25.9% | 28.5% |
| ADAMTS14  | 140766 | 31.3% | 27.7% | 26.5% | 28.5% |
| SCN3A     | 6328   | 36.3% | 27.7% | 21.5% | 28.5% |
| LOC339768 | 339768 | 23.7% | 31.6% | 30.3% | 28.5% |
| KIAA0409  | 23378  | 30.6% | 22.8% | 32.1% | 28.5% |
| KBTBD10   | 10324  | 34.6% | 30.5% | 20.4% | 28.5% |
| SERPINA4  | 5267   | 26.0% | 35.4% | 24.1% | 28.5% |
| CFLAR     | 8837   | 30.4% | 11.5% | 43.6% | 28.5% |
| TSPAN3    | 10099  | 30.2% | 21.7% | 33.6% | 28.5% |
| NCSTN     | 23385  | 36.6% | 32.2% | 16.8% | 28.5% |
| PCDH89    | 56127  | 35.2% | 21.8% | 28.6% | 28.5% |
| RASL10B   | 91608  | 49.2% | 21.0% | 15.5% | 28.5% |
| MEF2A     | 4205   | 34.5% | 22.0% | 29.1% | 28.5% |
| PLA2G4A   | 5321   | 48.6% | 18.8% | 18.1% | 28.5% |
| CHAC2     | 494143 | 28.0% | 24.9% | 32.7% | 28.5% |
| TIF1      | 8805   | 26.0% | 34.8% | 24.7% | 28.5% |
| MT1F      | 4494   | 39.6% | 19.0% | 27.0% | 28.5% |
| RNF12     | 51132  | 28.6% | 27.7% | 29.3% | 28.5% |
| LRRC18    | 474354 | 32.1% | 30.8% | 22.6% | 28.5% |
| CAP350    | 9857   | 19.0% | 18.8% | 47.8% | 28.5% |
| CLEC1     | 51267  | 38.8% | 18.6% | 28.2% | 28.5% |
| GABARAP   | 11337  | 34.4% | 25.4% | 25.8% | 28.5% |
| NJMU-R1   | 64149  | 24.5% | 30.9% | 30.2% | 28.5% |
| DRPLA     | 1822   | 36.4% | 21.3% | 27.9% | 28.5% |
| IRTA1     | 83417  | 32.8% | 27.6% | 25.2% | 28.5% |
| ZFYVE20   | 64145  | 24.9% | 28.5% | 32.2% | 28.5% |
| HIST4H4   | 121504 | 34.6% | 26.2% | 24.8% | 28.5% |
| PLK2      | 10769  | 24.4% | 28.0% | 33.2% | 28.5% |
| FZD9      | 8326   | 30.2% | 30.5% | 24.9% | 28.5% |
| IL17RB    | 55540  | 27.8% | 25.8% | 32.0% | 28.5% |
| MED31     | 51003  | 32.7% | 20.0% | 32.9% | 28.5% |
| UBQLN3    | 50613  | 38.0% | 23.2% | 24.4% | 28.5% |
| MAN1A2    | 10905  | 26.5% | 32.2% | 27.0% | 28.5% |
| LOC63929  | 63929  | 35.4% | 27.1% | 23.1% | 28.5% |
| HSA272196 | 55352  | 27.0% | 9.9%  | 48.7% | 28.5% |
| SUMO4     | 387082 | 25.4% | 28.6% | 31.7% | 28.5% |
| PCDH15    | 65217  | 26.4% | 32.0% | 27.2% | 28.5% |
| MYOZ3     | 91977  | 40.0% | 20.0% | 25.6% | 28.5% |
| FLJ22269  | 84179  | 25.3% | 15.7% | 44.6% | 28.5% |
| ITPR3     | 3710   | 38.8% | 19.2% | 27.6% | 28.6% |
| MUCDHL    | 53841  | 28.0% | 20.8% | 36.8% | 28.6% |
| VAMP1     | 6843   | 32.6% | 16.9% | 36.1% | 28.6% |
| FLJ31204  | 158584 | 30.6% | 28.6% | 26.5% | 28.6% |
| FLJ38736  | 256764 | 25.1% | 19.0% | 41.5% | 28.6% |
| KIAA0459  | 23252  | 25.0% | 29.4% | 31.3% | 28.6% |
| PARP4     | 143    | 33.1% | 28.2% | 24.4% | 28.6% |
| SEH1L     | 81929  | 34.0% | 31.5% | 20.1% | 28.6% |
| MDS028    | 55846  | 25.3% | 27.3% | 33.1% | 28.6% |
| AOF2      | 23028  | 39.7% | 23.9% | 22.1% | 28.6% |
| BMP15     | 9210   | 33.2% | 21.8% | 30.7% | 28.6% |
| SMARCA1   | 50485  | 32.3% | 30.8% | 22.6% | 28.6% |
| TMEM171   | 134285 | 25.1% | 31.7% | 28.8% | 28.6% |
| MGC10084  | 255520 | 25.2% | 21.9% | 38.6% | 28.6% |
| GTF3C2    | 2976   | 38.7% | 14.5% | 32.5% | 28.6% |
| SLC26A6   | 65010  | 24.6% | 24.4% | 36.6% | 28.6% |
| CTNND2    | 1501   | 25.4% | 33.6% | 26.7% | 28.6% |
| MOGAT3    | 346606 | 26.5% | 23.4% | 35.9% | 28.6% |
| ANGPT2    | 285    | 38.8% | 15.9% | 31.0% | 28.6% |
| SERPINF1  | 5176   | 31.0% | 29.8% | 24.9% | 28.6% |
| DHDD5     | 79947  | 41.3% | 20.0% | 24.4% | 28.6% |
| PLAC8     | 51316  | 27.1% | 33.8% | 24.9% | 28.6% |
| FCGR2B    | 2213   | 25.1% | 27.0% | 33.6% | 28.6% |
| LOC645432 | 645432 | 25.9% | 21.0% | 38.8% | 28.6% |
| MYOD1     | 4654   | 36.1% | 17.8% | 31.9% | 28.6% |
| ERP70     | 9601   | 27.1% | 29.9% | 28.8% | 28.6% |
| S100A5    | 6276   | 33.5% | 30.9% | 21.3% | 28.6% |
| FUT5      | 2527   | 36.8% | 21.4% | 27.5% | 28.6% |
| NFATC1    | 4772   | 37.7% | 24.1% | 24.0% | 28.6% |
| ABCC2     | 1244   | 36.0% | 26.8% | 22.9% | 28.6% |
| WDR31     | 114987 | 27.5% | 30.2% | 28.1% | 28.6% |
| ZNF354B   | 117608 | 29.9% | 27.1% | 28.8% | 28.6% |
| KIAA0460  | 23248  | 39.7% | 18.8% | 27.3% | 28.6% |
| KCTD1     | 284252 | 23.3% | 33.3% | 29.1% | 28.6% |
| SIAT7F    | 30815  | 25.6% | 31.0% | 29.1% | 28.6% |
| HoxA7     | 3204   | 25.8% | 22.4% | 37.5% | 28.6% |
| LDHB      | 3945   | 36.1% | 23.8% | 25.8% | 28.6% |
| FIBCD1    | 84929  | 29.2% | 29.9% | 26.7% | 28.6% |
| LOC149643 | 149643 | 36.5% | 26.1% | 23.2% | 28.6% |
| COG7      | 91949  | 44.9% | 24.5% | 16.3% | 28.6% |
| C9ORF78   | 51759  | 41.9% | 20.9% | 23.0% | 28.6% |
| C17       | 54360  | 21.2% | 36.1% | 28.5% | 28.6% |
| SMC4L1    | 10051  | 32.2% | 29.5% | 24.1% | 28.6% |

|                  |        |       |       |       |       |
|------------------|--------|-------|-------|-------|-------|
| LLOXNC01-237H1.1 | 282808 | 34.2% | 27.8% | 23.7% | 28.6% |
| STAT5A           | 6776   | 39.6% | 20.5% | 25.7% | 28.6% |
| CYP2U1           | 113612 | 29.7% | 22.6% | 33.5% | 28.6% |
| RB1CC1           | 9821   | 28.8% | 26.4% | 30.6% | 28.6% |
| KRTAP6-2         | 337967 | 25.3% | 36.8% | 23.6% | 28.6% |
| PHF15            | 23338  | 29.4% | 24.8% | 31.6% | 28.6% |
| COL2A1           | 1280   | 33.3% | 30.1% | 22.3% | 28.6% |
| GOLGB1           | 2804   | 27.1% | 26.9% | 31.8% | 28.6% |
| PCDH12           | 56137  | 34.9% | 22.9% | 28.0% | 28.6% |
| FUNDC1           | 139341 | 35.2% | 26.7% | 23.9% | 28.6% |
| S100B            | 6285   | 26.2% | 21.1% | 38.6% | 28.6% |
| FNTA             | 2339   | 38.0% | 25.9% | 21.9% | 28.6% |
| ZNF533           | 151126 | 30.9% | 26.3% | 28.6% | 28.6% |
| ATP5G1           | 516    | 24.0% | 21.6% | 40.2% | 28.6% |
| CYP11A1          | 1583   | 27.6% | 18.9% | 39.3% | 28.6% |
| WNT8A            | 7478   | 32.2% | 18.1% | 35.5% | 28.6% |
| LAP1B            | 26092  | 40.0% | 20.4% | 25.4% | 28.6% |
| PRKG1            | 5592   | 30.0% | 31.6% | 24.2% | 28.6% |
| GRIA3            | 2892   | 30.7% | 26.4% | 28.7% | 28.6% |
| AATF             | 26574  | 29.6% | 34.9% | 21.3% | 28.6% |
| LOC644943        | 644943 | 47.2% | 11.1% | 27.5% | 28.6% |
| DEFB134          | 613211 | 36.4% | 28.7% | 20.7% | 28.6% |
| FLJ10560         | 55171  | 34.2% | 15.7% | 35.9% | 28.6% |
| LOC91181         | 91181  | 23.9% | 25.7% | 36.3% | 28.6% |
| RNUT1            | 10073  | 24.7% | 36.8% | 24.3% | 28.6% |
| GPR64            | 10149  | 29.2% | 36.0% | 20.7% | 28.6% |
| KIAA1191         | 57179  | 50.0% | 18.0% | 17.8% | 28.6% |
| ROD1             | 9991   | 33.0% | 29.3% | 23.5% | 28.6% |
| HCN1             | 348980 | 43.8% | 17.3% | 24.8% | 28.6% |
| CHAF1A           | 10036  | 28.6% | 27.3% | 30.0% | 28.6% |
| KIAA0261         | 23063  | 21.9% | 20.0% | 43.9% | 28.6% |
| MGC48998         | 339512 | 33.3% | 13.5% | 39.1% | 28.6% |
| PFAAP5           | 10443  | 29.8% | 29.4% | 26.7% | 28.6% |
| PWP1             | 11137  | 36.9% | 26.4% | 22.6% | 28.6% |
| DKFZP76100113    | 55805  | 29.4% | 18.0% | 38.4% | 28.6% |
| UGT2B4           | 7363   | 32.4% | 23.3% | 30.2% | 28.6% |
| DACT1            | 51339  | 29.0% | 27.0% | 29.9% | 28.6% |
| FLJ30726         | 124961 | 20.2% | 23.0% | 42.7% | 28.6% |
| CEACAM3          | 1084   | 28.9% | 26.5% | 30.5% | 28.6% |
| DNAJA5           | 134218 | 25.5% | 27.8% | 32.6% | 28.6% |
| RAB18            | 22931  | 31.1% | 20.4% | 34.4% | 28.6% |
| CIR              | 9541   | 22.2% | 27.8% | 35.9% | 28.6% |
| SNX10            | 29887  | 40.1% | 21.5% | 24.2% | 28.6% |
| ARF1             | 375    | 29.7% | 27.6% | 28.6% | 28.6% |
| GMPR             | 2766   | 36.1% | 33.2% | 16.6% | 28.6% |
| WNT16            | 51384  | 38.5% | 26.1% | 21.3% | 28.6% |
| STX18            | 53407  | 25.4% | 34.8% | 25.7% | 28.6% |
| SSTK             | 83983  | 27.1% | 27.6% | 31.2% | 28.6% |
| ATP6V1F          | 9296   | 42.8% | 20.9% | 22.2% | 28.6% |
| NALP9            | 338321 | 27.5% | 21.2% | 37.1% | 28.6% |
| KIAA1701         | 80823  | 28.9% | 24.1% | 32.9% | 28.6% |
| RP4-692D3.1      | 728621 | 42.7% | 22.7% | 20.4% | 28.6% |
| SRP68            | 6730   | 29.0% | 30.2% | 26.7% | 28.6% |
| MTCH2            | 23788  | 37.0% | 25.8% | 23.1% | 28.6% |
| STRBP            | 55342  | 29.6% | 22.7% | 33.6% | 28.6% |
| CHL1             | 10752  | 34.8% | 19.5% | 31.6% | 28.6% |
| XPNP2            | 7512   | 27.9% | 38.4% | 19.6% | 28.6% |
| CXORF22          | 170063 | 46.8% | 19.4% | 19.8% | 28.6% |
| DJ462023.2       | 57185  | 32.5% | 18.0% | 35.4% | 28.6% |
| CRELD1           | 78987  | 25.8% | 21.2% | 38.9% | 28.6% |
| SAG              | 6295   | 40.5% | 22.5% | 22.9% | 28.6% |
| ARHI             | 9077   | 20.0% | 37.5% | 28.4% | 28.6% |
| CDA              | 978    | 34.1% | 24.3% | 27.5% | 28.6% |
| TTBK1            | 84630  | 27.0% | 30.5% | 28.4% | 28.6% |
| LZTFL1           | 54585  | 49.3% | 15.1% | 21.5% | 28.6% |
| TMEM46           | 387914 | 28.8% | 23.4% | 33.8% | 28.6% |
| MGC4796          | 83931  | 24.2% | 26.8% | 34.9% | 28.6% |
| PI16             | 221476 | 34.8% | 28.4% | 22.7% | 28.6% |
| ZNF439           | 90594  | 29.6% | 24.4% | 32.0% | 28.6% |
| MGC4189          | 84268  | 28.2% | 24.6% | 33.1% | 28.6% |
| PLEKH1A          | 59338  | 30.6% | 32.9% | 22.5% | 28.6% |
| LOC402682        | 402682 | 34.6% | 14.3% | 37.1% | 28.6% |
| NTF3             | 4908   | 36.8% | 17.4% | 31.7% | 28.6% |
| PFN1             | 5216   | 40.5% | 21.9% | 23.6% | 28.7% |
| ZNF592           | 9640   | 32.4% | 26.9% | 26.6% | 28.7% |
| OR2W1            | 26692  | 30.6% | 20.3% | 35.0% | 28.7% |
| SLC36A4          | 120103 | 24.5% | 33.8% | 27.7% | 28.7% |
| HES2             | 54626  | 40.2% | 20.7% | 25.1% | 28.7% |
| PSCD4            | 27128  | 34.8% | 30.6% | 20.6% | 28.7% |
| SH3YL1           | 26751  | 32.4% | 31.3% | 22.4% | 28.7% |
| DEFB105B         | 504180 | 26.8% | 27.4% | 31.8% | 28.7% |
| RAB3IP           | 117177 | 30.0% | 31.0% | 24.9% | 28.7% |
| PLXDC1           | 57125  | 36.8% | 20.5% | 28.7% | 28.7% |
| C10ORF61         | 26123  | 25.3% | 27.1% | 33.6% | 28.7% |
| DAZ3             | 57054  | 31.2% | 26.8% | 28.0% | 28.7% |
| ZNF84            | 7637   | 29.6% | 25.5% | 30.9% | 28.7% |
| MGC34290         | 120400 | 25.1% | 17.6% | 43.3% | 28.7% |
| STAG2            | 10735  | 33.6% | 22.9% | 29.4% | 28.7% |
| CXORF26          | 51260  | 30.1% | 36.6% | 19.4% | 28.7% |
| PLA2G4B          | 8681   | 29.9% | 30.9% | 25.2% | 28.7% |
| NFKBIZ           | 64332  | 32.9% | 29.5% | 23.6% | 28.7% |
| ARL3             | 403    | 34.3% | 21.6% | 30.0% | 28.7% |
| ZCWCC3           | 23515  | 19.3% | 28.1% | 38.6% | 28.7% |
| FLJ39553         | 203111 | 24.4% | 28.6% | 33.0% | 28.7% |
| KITLG            | 4254   | 26.3% | 27.1% | 32.7% | 28.7% |
| KRTAP10-10       | 353333 | 39.8% | 24.8% | 21.4% | 28.7% |
| KDEL2            | 11014  | 32.7% | 25.8% | 27.5% | 28.7% |
| BLCAP            | 10904  | 31.6% | 25.4% | 29.0% | 28.7% |



|           |        |       |       |       |       |
|-----------|--------|-------|-------|-------|-------|
| MGC44294  | 145946 | 29.5% | 20.6% | 35.9% | 28.7% |
| SHOC2     | 8036   | 31.3% | 27.7% | 27.0% | 28.7% |
| MYD88     | 4615   | 34.1% | 26.2% | 25.8% | 28.7% |
| SACM1L    | 22908  | 32.1% | 36.9% | 17.0% | 28.7% |
| TNIP2     | 79155  | 35.3% | 29.1% | 21.7% | 28.7% |
| AKAP8     | 10270  | 44.7% | 18.0% | 23.3% | 28.7% |
| KIAA1747  | 57795  | 31.4% | 25.5% | 29.1% | 28.7% |
| MRAP      | 56246  | 33.1% | 28.7% | 24.3% | 28.7% |
| EIF4B     | 1975   | 35.1% | 25.9% | 25.0% | 28.7% |
| PCDHA2    | 56146  | 37.1% | 30.1% | 18.8% | 28.7% |
| RFXDC1    | 222546 | 35.9% | 25.2% | 25.0% | 28.7% |
| C6ORF192  | 116843 | 33.7% | 25.1% | 27.3% | 28.7% |
| LOC399947 | 399947 | 38.6% | 22.2% | 25.3% | 28.7% |
| KSP37     | 83888  | 20.9% | 22.9% | 42.2% | 28.7% |
| PSMD9     | 5715   | 36.3% | 26.6% | 23.2% | 28.7% |
| ORS2E2    | 119678 | 19.0% | 32.1% | 34.9% | 28.7% |
| ALS2CR2   | 55437  | 26.4% | 36.8% | 22.9% | 28.7% |
| MGC29816  | 91782  | 25.4% | 20.1% | 40.5% | 28.7% |
| CCRN4L    | 25819  | 42.5% | 22.4% | 21.2% | 28.7% |
| FAM38B    | 63895  | 32.4% | 33.0% | 20.6% | 28.7% |
| LOC340204 | 340204 | 44.2% | 17.6% | 24.2% | 28.7% |
| CDON      | 50937  | 35.3% | 20.2% | 30.6% | 28.7% |
| TXNL2     | 10539  | 38.1% | 25.9% | 22.1% | 28.7% |
| LOC374969 | 374969 | 26.9% | 35.6% | 23.6% | 28.7% |
| CUEDC1    | 404093 | 36.2% | 30.8% | 19.1% | 28.7% |
| H2AF2     | 3015   | 34.1% | 29.5% | 22.6% | 28.7% |
| SLC7A14   | 57709  | 34.3% | 21.8% | 30.0% | 28.7% |
| FLJ30213  | 219539 | 22.8% | 17.9% | 45.4% | 28.7% |
| GAL3ST2   | 64090  | 38.1% | 22.2% | 25.8% | 28.7% |
| SYN3      | 8224   | 32.1% | 28.1% | 26.0% | 28.7% |
| ZIC4      | 84107  | 33.0% | 24.3% | 28.7% | 28.7% |
| NTRK1     | 4914   | 39.1% | 25.1% | 22.0% | 28.7% |
| FLJ43374  | 377007 | 18.5% | 33.6% | 34.0% | 28.7% |
| BITE      | 80321  | 32.0% | 25.8% | 28.3% | 28.7% |
| FLJ34658  | 133688 | 30.5% | 22.8% | 32.8% | 28.7% |
| FSD1L     | 83856  | 32.6% | 25.6% | 28.0% | 28.7% |
| EBI3      | 10148  | 35.5% | 19.7% | 30.9% | 28.7% |
| TCOF1     | 6949   | 39.0% | 26.6% | 20.5% | 28.7% |
| NYD-TSP1  | 84654  | 34.3% | 27.5% | 24.3% | 28.7% |
| H0XB2     | 3212   | 35.5% | 26.3% | 24.3% | 28.7% |
| LOC389289 | 389289 | 25.5% | 31.0% | 29.7% | 28.7% |
| MGC15737  | 85012  | 33.5% | 20.6% | 32.1% | 28.7% |
| FBXL3A    | 26224  | 35.9% | 25.6% | 24.7% | 28.7% |
| SST       | 6750   | 38.7% | 21.8% | 25.7% | 28.7% |
| KIAA0240  | 23506  | 31.3% | 32.3% | 22.6% | 28.7% |
| KIAA1443  | 57594  | 18.1% | 27.9% | 40.1% | 28.7% |
| TBXAS1    | 6916   | 28.9% | 32.3% | 25.0% | 28.7% |
| NPAS1     | 4861   | 37.0% | 18.9% | 30.3% | 28.7% |
| KIF11     | 3832   | 24.3% | 7.7%  | 54.2% | 28.7% |
| SAS       | 6302   | 22.6% | 19.5% | 44.1% | 28.7% |
| TECTB     | 6975   | 33.6% | 33.3% | 19.3% | 28.7% |
| ELYS      | 25909  | 38.0% | 25.0% | 23.2% | 28.7% |
| ELA2B     | 51032  | 34.3% | 23.8% | 28.1% | 28.7% |
| PNPT1     | 87178  | 37.6% | 30.9% | 17.7% | 28.7% |
| LOC392145 | 392145 | 30.9% | 25.7% | 29.6% | 28.7% |
| PNMA3     | 29944  | 28.6% | 27.9% | 29.7% | 28.7% |
| PRPS2     | 5634   | 16.1% | 39.6% | 30.5% | 28.7% |
| ZDHHC11   | 79844  | 23.9% | 31.7% | 30.6% | 28.7% |
| FRG1      | 2483   | 30.9% | 23.4% | 32.0% | 28.7% |
| KLHL21    | 9903   | 31.9% | 28.4% | 25.9% | 28.7% |
| EMP3      | 2014   | 31.0% | 27.2% | 28.0% | 28.7% |
| DUSP12    | 11266  | 23.5% | 36.4% | 26.3% | 28.7% |
| MYEOV     | 26579  | 33.8% | 27.9% | 24.5% | 28.7% |
| ZNF304    | 57343  | 22.0% | 32.6% | 31.6% | 28.7% |
| MTRF1L    | 54516  | 33.8% | 22.2% | 30.2% | 28.7% |
| REN       | 5972   | 29.3% | 27.1% | 29.8% | 28.7% |
| LOC146167 | 146167 | 31.3% | 29.6% | 25.3% | 28.7% |
| SLC17A5   | 26503  | 39.9% | 17.6% | 28.8% | 28.7% |
| TM9SF1    | 10548  | 30.6% | 33.1% | 22.6% | 28.7% |
| PIG5      | 94005  | 23.1% | 27.8% | 35.4% | 28.7% |
| SLC33A1   | 9197   | 33.3% | 26.7% | 26.2% | 28.7% |
| EPN3      | 55040  | 21.2% | 31.0% | 34.1% | 28.7% |
| BOK       | 666    | 22.2% | 27.9% | 36.2% | 28.7% |
| KIAA1946  | 165215 | 33.0% | 24.4% | 28.9% | 28.7% |
| CTNNB1    | 1499   | 36.3% | 31.9% | 18.0% | 28.7% |
| TMCC2     | 9911   | 27.5% | 31.7% | 27.1% | 28.7% |
| PCDHGB6   | 56100  | 20.8% | 37.2% | 28.2% | 28.7% |
| CPNE7     | 27132  | 37.7% | 18.8% | 29.8% | 28.8% |
| PROM2     | 150696 | 29.3% | 26.7% | 30.3% | 28.8% |
| KIAA0586  | 9786   | 30.1% | 27.6% | 28.5% | 28.8% |
| BLOC1S3   | 388552 | 30.9% | 32.7% | 22.7% | 28.8% |
| CLDN18    | 51208  | 34.5% | 28.8% | 23.0% | 28.8% |
| ALDR16    | 55586  | 33.3% | 22.0% | 31.0% | 28.8% |
| SPIN      | 10927  | 28.9% | 18.5% | 38.9% | 28.8% |
| USP29     | 57663  | 38.3% | 32.1% | 15.9% | 28.8% |
| MYO3B     | 140469 | 30.2% | 29.0% | 27.1% | 28.8% |
| KIAA1199  | 57214  | 31.3% | 29.9% | 25.1% | 28.8% |
| ABCC1     | 4363   | 27.9% | 26.8% | 31.5% | 28.8% |
| LRRC43    | 254050 | 25.6% | 36.5% | 24.2% | 28.8% |
| H4/o      | 554313 | 25.8% | 21.7% | 38.8% | 28.8% |
| RASSF3    | 283349 | 29.9% | 23.8% | 32.6% | 28.8% |
| LRRTM2    | 26045  | 31.5% | 17.7% | 37.1% | 28.8% |
| C20ORF175 | 140876 | 32.5% | 19.9% | 33.8% | 28.8% |
| OR2J3     | 442186 | 32.5% | 26.4% | 27.4% | 28.8% |
| PTPN14    | 5784   | 28.7% | 40.1% | 17.5% | 28.8% |
| KIAA1117  | 23033  | 28.3% | 25.8% | 32.3% | 28.8% |
| PCNXL2    | 80003  | 38.7% | 26.2% | 21.4% | 28.8% |
| SULT1B1   | 27284  | 25.8% | 28.7% | 31.8% | 28.8% |

|               |        |       |       |       |       |
|---------------|--------|-------|-------|-------|-------|
| TRIM50A       | 135892 | 36.7% | 25.8% | 23.8% | 28.8% |
| ARMC2         | 9823   | 31.4% | 33.8% | 21.1% | 28.8% |
| NPPC          | 4880   | 31.9% | 29.8% | 24.7% | 28.8% |
| TGFBR3        | 7049   | 29.8% | 30.3% | 26.3% | 28.8% |
| SLA           | 6503   | 14.3% | 34.0% | 38.1% | 28.8% |
| OR8H1         | 219469 | 34.2% | 32.7% | 19.4% | 28.8% |
| LRIG3         | 121227 | 42.9% | 20.0% | 23.5% | 28.8% |
| SLC2A3ARG     | 56731  | 31.8% | 21.6% | 33.0% | 28.8% |
| DNAJ7         | 7266   | 35.3% | 21.6% | 29.4% | 28.8% |
| MT3           | 4504   | 29.0% | 25.1% | 32.2% | 28.8% |
| LHX2          | 9355   | 31.6% | 29.8% | 25.0% | 28.8% |
| FLJ22655      | 79785  | 34.5% | 20.8% | 31.0% | 28.8% |
| TLR2          | 7097   | 24.3% | 40.8% | 21.2% | 28.8% |
| TDRD3         | 81550  | 36.0% | 27.7% | 22.7% | 28.8% |
| C10ORF58      | 84293  | 34.9% | 26.5% | 25.0% | 28.8% |
| UTP14A        | 10813  | 31.2% | 29.9% | 25.4% | 28.8% |
| FLJ12442      | 64943  | 30.8% | 23.7% | 31.9% | 28.8% |
| LOC339344     | 339344 | 42.3% | 20.8% | 23.4% | 28.8% |
| KLRC4         | 8302   | 30.2% | 33.7% | 22.5% | 28.8% |
| SLB           | 26160  | 28.3% | 14.3% | 43.8% | 28.8% |
| MGC48595      | 399671 | 32.4% | 26.8% | 27.3% | 28.8% |
| BCL11B        | 64919  | 35.8% | 28.4% | 22.2% | 28.8% |
| LOC389432     | 389432 | 22.4% | 30.9% | 33.1% | 28.8% |
| FLJ20298      | 54885  | 24.9% | 21.5% | 40.0% | 28.8% |
| STAU          | 6780   | 24.7% | 20.7% | 41.0% | 28.8% |
| VX2           | 51480  | 42.6% | 24.0% | 19.8% | 28.8% |
| MYH11         | 4629   | 42.4% | 24.6% | 19.5% | 28.8% |
| PHKB          | 5257   | 24.3% | 34.7% | 27.4% | 28.8% |
| TAZ           | 25937  | 35.9% | 18.1% | 32.5% | 28.8% |
| PGR1          | 93621  | 29.6% | 24.4% | 32.4% | 28.8% |
| B3GNT5        | 84002  | 43.4% | 11.5% | 31.5% | 28.8% |
| HSPB8         | 26353  | 27.4% | 30.1% | 29.0% | 28.8% |
| RPS6KA4       | 8986   | 21.7% | 30.9% | 33.8% | 28.8% |
| PIPSK2A       | 5305   | 30.5% | 25.9% | 30.1% | 28.8% |
| NTN4          | 59277  | 35.4% | 28.5% | 22.6% | 28.8% |
| C9ORF127      | 51754  | 33.9% | 26.4% | 26.2% | 28.8% |
| OR10K1        | 391109 | 31.6% | 29.2% | 25.7% | 28.8% |
| HIST1H3B      | 8358   | 32.2% | 31.5% | 22.8% | 28.8% |
| RAB11A        | 8766   | 32.6% | 21.5% | 32.4% | 28.8% |
| RRAS2         | 22800  | 35.9% | 23.6% | 27.0% | 28.8% |
| SRCAP         | 10847  | 27.1% | 25.9% | 33.5% | 28.8% |
| BIRC4         | 331    | 30.2% | 22.4% | 33.9% | 28.8% |
| WDTC1         | 23038  | 45.1% | 17.5% | 23.9% | 28.8% |
| HSGT1         | 11319  | 41.7% | 11.2% | 33.5% | 28.8% |
| KRTAP4-12     | 83755  | 22.5% | 30.2% | 33.8% | 28.8% |
| LOC114984     | 114984 | 33.9% | 24.1% | 28.4% | 28.8% |
| OR1N2         | 138882 | 48.1% | 13.6% | 24.8% | 28.8% |
| MTMR7         | 9108   | 29.9% | 32.3% | 24.2% | 28.8% |
| TMEM43        | 79188  | 22.4% | 28.6% | 35.6% | 28.8% |
| FAT2          | 2196   | 54.5% | 14.8% | 17.2% | 28.8% |
| KLF5          | 688    | 40.4% | 16.2% | 29.9% | 28.8% |
| SLCO4C1       | 353189 | 38.4% | 18.7% | 29.4% | 28.8% |
| NUBP1         | 4682   | 24.7% | 29.4% | 32.4% | 28.8% |
| GNG10         | 2790   | 38.0% | 19.0% | 29.5% | 28.8% |
| RBMS1         | 5937   | 38.8% | 26.2% | 21.5% | 28.8% |
| LOC93349      | 93349  | 31.3% | 31.5% | 23.7% | 28.8% |
| UBE2Q2        | 92912  | 34.9% | 17.7% | 33.9% | 28.8% |
| AADAC         | 13     | 38.2% | 22.1% | 26.3% | 28.8% |
| TANK          | 10010  | 38.9% | 25.3% | 22.3% | 28.8% |
| KIAA0143      | 23167  | 41.1% | 24.7% | 20.7% | 28.8% |
| KIAA1900      | 114792 | 26.4% | 23.8% | 36.4% | 28.8% |
| MAP3K8        | 1326   | 25.2% | 26.7% | 34.6% | 28.8% |
| FLJ10326      | 55699  | 25.8% | 25.6% | 35.1% | 28.8% |
| DSIP1         | 1831   | 24.5% | 22.9% | 39.1% | 28.8% |
| RGS8          | 85397  | 35.4% | 19.4% | 31.7% | 28.8% |
| SMC6L1        | 79677  | 25.2% | 37.6% | 23.8% | 28.8% |
| ATG16L1       | 55054  | 35.3% | 31.3% | 19.9% | 28.8% |
| ADRA2B        | 151    | 29.8% | 28.8% | 27.9% | 28.9% |
| KRT9          | 3857   | 39.1% | 25.2% | 22.3% | 28.9% |
| CDK5RAP3      | 80279  | 37.0% | 22.1% | 27.4% | 28.9% |
| OS-9          | 10956  | 30.8% | 17.4% | 38.3% | 28.9% |
| PCDH85        | 26167  | 33.3% | 22.7% | 30.5% | 28.9% |
| STX4A         | 6810   | 19.7% | 18.6% | 48.2% | 28.9% |
| ITGAL         | 3683   | 45.1% | 16.9% | 24.6% | 28.9% |
| LZIC          | 84328  | 43.1% | 18.3% | 25.2% | 28.9% |
| C10ORF104     | 119504 | 33.0% | 21.4% | 32.2% | 28.9% |
| HAO2          | 51179  | 45.3% | 23.4% | 17.8% | 28.9% |
| OPRK1         | 4986   | 31.7% | 28.1% | 26.8% | 28.9% |
| PLUNC         | 51297  | 51.0% | 12.5% | 23.1% | 28.9% |
| LOC339229     | 339229 | 36.9% | 20.1% | 29.6% | 28.9% |
| FAM40B        | 57464  | 29.9% | 28.8% | 27.9% | 28.9% |
| FLJ22595      | 80117  | 37.6% | 22.4% | 26.6% | 28.9% |
| RNF11         | 26994  | 38.8% | 23.4% | 24.4% | 28.9% |
| KIAA0350      | 23274  | 30.3% | 30.5% | 25.8% | 28.9% |
| BG1           | 23205  | 41.2% | 21.9% | 23.5% | 28.9% |
| MAGEB2        | 4113   | 39.4% | 24.6% | 22.6% | 28.9% |
| LOC136242     | 136242 | 35.5% | 22.7% | 28.4% | 28.9% |
| LOC152485     | 152485 | 36.2% | 24.6% | 25.8% | 28.9% |
| UGT1A6        | 54578  | 29.1% | 31.7% | 25.8% | 28.9% |
| PEX11A        | 8800   | 27.5% | 34.4% | 24.7% | 28.9% |
| MLR2          | 84458  | 25.4% | 25.6% | 35.6% | 28.9% |
| FER           | 2241   | 38.9% | 26.5% | 21.2% | 28.9% |
| MYL2          | 4633   | 31.8% | 31.7% | 23.1% | 28.9% |
| HD            | 3064   | 44.0% | 21.6% | 21.0% | 28.9% |
| COL4A1        | 1282   | 40.7% | 22.6% | 23.4% | 28.9% |
| ANXA11        | 311    | 39.7% | 22.5% | 24.5% | 28.9% |
| DKFZP564D1378 | 84064  | 38.8% | 19.6% | 28.2% | 28.9% |
| CPNE4         | 131034 | 33.3% | 31.5% | 21.8% | 28.9% |

|           |           |       |       |       |       |
|-----------|-----------|-------|-------|-------|-------|
| SLBP      | 7884      | 0.0%  | 20.0% | 66.7% | 28.9% |
| TSAP6     | 55240     | 38.1% | 25.2% | 23.3% | 28.9% |
| ATPAF1    | 64756     | 38.2% | 22.0% | 26.4% | 28.9% |
| HT001     | 28990     | 20.9% | 22.8% | 42.9% | 28.9% |
| BRMS1L    | 84312     | 34.0% | 22.0% | 30.7% | 28.9% |
| THRA      | 7067      | 28.1% | 26.8% | 31.8% | 28.9% |
| CD300LG   | 146894    | 39.7% | 27.3% | 19.7% | 28.9% |
| NDRG3     | 57446     | 40.3% | 19.2% | 27.2% | 28.9% |
| TOM1L1    | 10040     | 41.9% | 16.6% | 28.2% | 28.9% |
| PCM1      | 5108      | 51.9% | 16.2% | 18.6% | 28.9% |
| OMA1      | 115209    | 34.1% | 23.4% | 29.3% | 28.9% |
| MAGEA11   | 4110      | 34.3% | 22.2% | 30.1% | 28.9% |
| OPN1MW    | 2652      | 41.1% | 15.8% | 29.8% | 28.9% |
| S100A7    | 6278      | 36.8% | 21.4% | 28.4% | 28.9% |
| SNX12     | 29934     | 30.8% | 31.4% | 24.6% | 28.9% |
| BDKRB2    | 624       | 29.5% | 32.8% | 24.4% | 28.9% |
| KCNJ6     | 3763      | 41.8% | 21.5% | 23.4% | 28.9% |
| CPXCR1    | 53336     | 41.5% | 23.0% | 22.2% | 28.9% |
| TSPYL1    | 7259      | 31.9% | 23.7% | 31.2% | 28.9% |
| LOC200205 | 200205    | 26.5% | 22.7% | 37.6% | 28.9% |
| GPR160    | 26996     | 33.0% | 26.8% | 26.9% | 28.9% |
| KLK15     | 55554     | 31.5% | 35.0% | 20.2% | 28.9% |
| RNPEPL1   | 57140     | 30.1% | 28.9% | 27.7% | 28.9% |
| MGC44903  | 414060    | 18.1% | 27.0% | 41.6% | 28.9% |
| FOXJ3     | 22887     | 30.0% | 15.5% | 41.2% | 28.9% |
| GPRCSD    | 55507     | 22.4% | 41.7% | 22.7% | 28.9% |
| HELLS     | 3070      | 30.5% | 26.5% | 29.8% | 28.9% |
| WNT6      | 7475      | 39.2% | 21.9% | 25.6% | 28.9% |
| LUC7A     | 51747     | 25.6% | 26.9% | 34.2% | 28.9% |
| PPP3CB    | 5532      | 36.1% | 29.4% | 21.3% | 28.9% |
| FBXL12    | 54850     | 36.6% | 22.8% | 27.4% | 28.9% |
| STAP2     | 55620     | 28.9% | 25.1% | 32.8% | 28.9% |
| PRKRA     | 8575      | 25.5% | 30.3% | 31.0% | 28.9% |
| RABEP1    | 9135      | 23.7% | 31.0% | 32.0% | 28.9% |
| THSD2     | 84870     | 29.3% | 23.9% | 33.5% | 28.9% |
| PRKCD     | 5580      | 25.2% | 36.2% | 25.4% | 28.9% |
| NOB1P     | 28987     | 31.4% | 25.6% | 29.8% | 28.9% |
| PHYH      | 5264      | 48.5% | 13.7% | 24.5% | 28.9% |
| C20ORF128 | 128876    | 19.6% | 31.9% | 35.3% | 28.9% |
| SCGN      | 10590     | 25.4% | 32.8% | 28.6% | 28.9% |
| FLJ23471  | 79778     | 27.0% | 30.3% | 29.5% | 28.9% |
| HLA-DRB4  | 3126      | 41.2% | 21.1% | 24.6% | 28.9% |
| CTGLF1    | 119016    | 35.8% | 36.0% | 14.9% | 28.9% |
| CARHSP1   | 23589     | 35.4% | 32.6% | 18.8% | 28.9% |
| NDUF1C    | 4717      | 41.1% | 17.5% | 28.1% | 28.9% |
| GABRA2    | 2555      | 35.1% | 17.1% | 34.6% | 28.9% |
| GLTP      | 51228     | 22.0% | 27.5% | 37.3% | 28.9% |
| SCGB3A2   | 117156    | 34.1% | 21.2% | 31.5% | 28.9% |
| FLJ13111  | 80152     | 28.4% | 30.9% | 27.5% | 28.9% |
| MAGEA4    | 4103      | 37.2% | 33.0% | 16.7% | 28.9% |
| PPP1R3F   | 89801     | 48.5% | 20.5% | 17.9% | 28.9% |
| ODC1      | 4953      | 33.1% | 22.7% | 31.0% | 28.9% |
| ASL       | 435       | 26.3% | 24.1% | 36.4% | 28.9% |
| KRTCAP3   | 200634    | 31.6% | 30.8% | 24.4% | 28.9% |
| TCF15     | 6939      | 32.6% | 28.2% | 26.0% | 28.9% |
| GCA       | 25801     | 37.9% | 15.2% | 33.7% | 28.9% |
| TUSC5     | 286753    | 24.1% | 36.2% | 26.6% | 28.9% |
| FLJ31951  | 153830    | 34.7% | 26.1% | 26.0% | 28.9% |
| RAP80     | 51720     | 33.0% | 24.7% | 29.2% | 28.9% |
| MNT       | 4335      | 38.4% | 24.3% | 24.2% | 28.9% |
| GPR12     | 2835      | 28.4% | 28.6% | 29.8% | 28.9% |
| FOXD3     | 27022     | 32.6% | 30.4% | 23.8% | 28.9% |
| MDS025    | 60492     | 41.2% | 28.0% | 17.6% | 28.9% |
| MAGEB1    | 4112      | 36.7% | 26.0% | 24.1% | 28.9% |
| DLK1      | 8788      | 47.2% | 18.0% | 21.6% | 28.9% |
| DNAL4     | 10126     | 46.8% | 15.0% | 25.1% | 29.0% |
| MAP3K3    | 4215      | 25.5% | 23.9% | 37.4% | 29.0% |
| C14ORF45  | 80127     | 43.2% | 19.6% | 24.0% | 29.0% |
| TUBB1     | 81027     | 21.7% | 30.9% | 34.3% | 29.0% |
| C9ORF5    | 23731     | 35.5% | 23.1% | 28.3% | 29.0% |
| ATG5      | 9474      | 40.5% | 21.1% | 25.3% | 29.0% |
| FPGT      | 8790      | 27.4% | 37.8% | 21.7% | 29.0% |
| MGC42174  | 129563    | 33.0% | 29.6% | 24.3% | 29.0% |
| FLJ12505  | 79805     | 24.4% | 32.9% | 29.7% | 29.0% |
| FGD3      | 89846     | 30.7% | 28.8% | 27.3% | 29.0% |
| LOC441425 | 441425    | 28.4% | 28.5% | 30.0% | 29.0% |
| MMP19     | 4327      | 37.8% | 25.2% | 23.9% | 29.0% |
| LRCH1     | 23143     | 24.9% | 27.8% | 34.2% | 29.0% |
| TPM1      | 7168      | 34.1% | 26.7% | 26.1% | 29.0% |
| FLJ46688  | 440107    | 36.7% | 28.5% | 21.7% | 29.0% |
| ERBB2     | 2064      | 40.9% | 21.2% | 24.8% | 29.0% |
| DPH2L1    | 1801      | 15.8% | 40.0% | 31.1% | 29.0% |
| GTFR2IRD1 | 9569      | 31.1% | 26.0% | 29.8% | 29.0% |
| WRB       | 7485      | 37.8% | 25.1% | 24.1% | 29.0% |
| C14ORF1   | 11161     | 35.8% | 24.9% | 26.3% | 29.0% |
| LOC201176 | 201176    | 27.9% | 15.9% | 43.1% | 29.0% |
| FLJ13615  | 80184     | 25.5% | 22.3% | 39.1% | 29.0% |
| C1orf165  | 79656     | 38.1% | 23.2% | 25.6% | 29.0% |
| NP        | 4860      | 24.9% | 30.1% | 31.9% | 29.0% |
| C17orf96  | 100170841 | 37.6% | 25.6% | 23.7% | 29.0% |
| LRRC28    | 123355    | 39.3% | 21.0% | 26.6% | 29.0% |
| USP2      | 9099      | 34.1% | 17.7% | 35.1% | 29.0% |
| KCNV1     | 27012     | 31.0% | 24.4% | 31.6% | 29.0% |
| FN1       | 2335      | 39.7% | 17.3% | 29.9% | 29.0% |
| NELL2     | 4753      | 30.1% | 27.5% | 29.4% | 29.0% |
| CRLF1     | 9244      | 36.1% | 26.0% | 24.9% | 29.0% |
| EPHA8     | 2046      | 23.6% | 29.8% | 33.6% | 29.0% |
| PRIM1     | 5557      | 48.2% | 20.3% | 18.4% | 29.0% |

|               |           |       |       |       |       |
|---------------|-----------|-------|-------|-------|-------|
| KIAA0971      | 22868     | 36.4% | 21.3% | 29.2% | 29.0% |
| MRC2          | 9902      | 40.2% | 20.7% | 26.0% | 29.0% |
| C9ORF42       | 116224    | 23.0% | 31.2% | 32.7% | 29.0% |
| TSGA14        | 95681     | 40.1% | 24.9% | 22.0% | 29.0% |
| CPSF4         | 10898     | 34.9% | 28.3% | 23.8% | 29.0% |
| DKFZP586A0522 | 25840     | 27.1% | 31.2% | 28.7% | 29.0% |
| FLJ25078      | 148304    | 36.6% | 24.0% | 26.3% | 29.0% |
| FAM9C         | 171484    | 35.7% | 20.7% | 30.6% | 29.0% |
| C8A           | 731       | 28.0% | 21.6% | 37.4% | 29.0% |
| MAP3K1        | 4214      | 29.2% | 26.9% | 30.9% | 29.0% |
| ANGPTL6       | 83854     | 30.1% | 25.4% | 31.5% | 29.0% |
| SORBS3        | 10174     | 31.4% | 36.4% | 19.2% | 29.0% |
| OR51F2        | 119694    | 34.4% | 28.5% | 24.1% | 29.0% |
| ZNF491        | 126069    | 41.2% | 18.8% | 27.1% | 29.0% |
| POLS          | 11044     | 28.0% | 31.1% | 27.9% | 29.0% |
| PEX26         | 55670     | 22.2% | 33.7% | 31.1% | 29.0% |
| FLJ22390      | 64757     | 21.2% | 15.4% | 50.4% | 29.0% |
| FSTL5         | 56884     | 23.0% | 28.0% | 36.1% | 29.0% |
| FLJ33516      | 139221    | 24.4% | 14.3% | 48.3% | 29.0% |
| RP11-544M22.4 | 100131187 | 27.5% | 28.7% | 30.8% | 29.0% |
| ZNF92         | 168374    | 40.8% | 23.9% | 22.2% | 29.0% |
| CAPZA3        | 93661     | 29.8% | 25.2% | 32.0% | 29.0% |
| HIG2          | 29923     | 18.9% | 41.7% | 26.4% | 29.0% |
| HAS2          | 3037      | 33.9% | 23.8% | 29.3% | 29.0% |
| FLJ41603      | 389337    | 37.9% | 21.2% | 28.0% | 29.0% |
| UGT1A4        | 54657     | 28.7% | 29.9% | 28.4% | 29.0% |
| LOC474170     | 474170    | 24.8% | 31.2% | 31.1% | 29.0% |
| ORA416        | 81327     | 23.6% | 33.9% | 29.5% | 29.0% |
| I3CDNA73      | 10129     | 23.9% | 31.8% | 31.4% | 29.0% |
| CANP          | 374393    | 13.4% | 31.8% | 41.8% | 29.0% |
| SERTAD4       | 56256     | 40.5% | 34.0% | 12.6% | 29.0% |
| ASH2L         | 9070      | 33.2% | 18.7% | 35.2% | 29.0% |
| DKFZP434H2010 | 84069     | 16.2% | 12.5% | 58.3% | 29.0% |
| FLJ21934      | 79799     | 37.6% | 30.5% | 18.9% | 29.0% |
| C21ORF63      | 59271     | 28.5% | 23.3% | 35.3% | 29.0% |
| DNAJC3        | 5611      | 28.7% | 23.7% | 34.6% | 29.0% |
| TM7SF3        | 51768     | 42.1% | 23.7% | 21.2% | 29.0% |
| GKAP1         | 80318     | 37.9% | 25.5% | 23.7% | 29.0% |
| SLC7A8        | 23428     | 44.2% | 19.8% | 23.1% | 29.0% |
| ATPSG3        | 518       | 36.2% | 22.4% | 28.5% | 29.0% |
| HNRPDL        | 9987      | 33.8% | 27.0% | 26.2% | 29.0% |
| LAPTM4A       | 9741      | 32.7% | 24.6% | 29.8% | 29.0% |
| TLR4          | 7099      | 33.8% | 25.5% | 27.7% | 29.0% |
| IL11RA        | 3590      | 32.8% | 23.5% | 30.8% | 29.0% |
| DKFZP434K2435 | 84216     | 27.2% | 24.6% | 35.3% | 29.0% |
| OR4D10        | 390197    | 29.5% | 27.5% | 30.1% | 29.0% |
| SPATA11       | 84266     | 24.1% | 29.6% | 33.3% | 29.0% |
| LOC389834     | 389834    | 37.5% | 18.1% | 31.5% | 29.0% |
| C10ORF77      | 79847     | 33.0% | 24.8% | 29.3% | 29.0% |
| LOC134145     | 134145    | 39.0% | 31.1% | 17.1% | 29.0% |
| MMP25         | 64386     | 26.9% | 34.7% | 25.5% | 29.0% |
| PTPNS1        | 140885    | 38.3% | 26.9% | 21.9% | 29.0% |
| LOC441956     | 441956    | 31.9% | 29.5% | 25.7% | 29.0% |
| STK4          | 6789      | 32.0% | 27.3% | 27.8% | 29.0% |
| QSCN6L1       | 169714    | 34.9% | 27.5% | 24.7% | 29.0% |
| OIT3          | 170392    | 24.4% | 23.1% | 39.6% | 29.0% |
| C14ORF24      | 283635    | 27.9% | 23.6% | 35.6% | 29.0% |
| NRIP3         | 56675     | 38.3% | 24.6% | 24.3% | 29.0% |
| MRPL35        | 51318     | 41.6% | 25.5% | 20.1% | 29.0% |
| FLJ40504      | 284085    | 32.5% | 22.8% | 31.9% | 29.0% |
| DTR           | 1839      | 30.8% | 28.0% | 28.3% | 29.0% |
| BGLAP         | 632       | 39.3% | 20.6% | 27.2% | 29.1% |
| SUHW2         | 140883    | 32.2% | 26.4% | 28.6% | 29.1% |
| ANTXR2        | 118429    | 30.9% | 23.8% | 32.4% | 29.1% |
| RLN3          | 117579    | 26.2% | 29.0% | 32.0% | 29.1% |
| GPR133        | 283383    | 32.9% | 28.6% | 25.7% | 29.1% |
| GOLPH3        | 64083     | 29.9% | 35.6% | 21.7% | 29.1% |
| SLITRK3       | 22865     | 41.7% | 25.1% | 20.4% | 29.1% |
| SHREW1        | 55966     | 26.2% | 32.3% | 28.6% | 29.1% |
| MYCN          | 4613      | 30.5% | 25.3% | 31.3% | 29.1% |
| ADIPOR2       | 79602     | 37.0% | 27.5% | 22.7% | 29.1% |
| FLJ32312      | 150962    | 39.7% | 16.5% | 30.9% | 29.1% |
| NINJ2         | 4815      | 26.1% | 36.2% | 24.9% | 29.1% |
| HSPC051       | 29796     | 31.1% | 18.2% | 37.9% | 29.1% |
| KIAA0423      | 23116     | 28.6% | 26.0% | 32.6% | 29.1% |
| TSKS          | 60385     | 23.2% | 39.0% | 25.0% | 29.1% |
| IL24          | 11009     | 40.8% | 20.8% | 25.5% | 29.1% |
| PARP10        | 84875     | 33.8% | 29.4% | 24.1% | 29.1% |
| LHB           | 3972      | 28.0% | 36.8% | 22.4% | 29.1% |
| TPST2         | 8459      | 33.3% | 20.7% | 33.2% | 29.1% |
| RHBDL2        | 54933     | 34.3% | 31.9% | 21.0% | 29.1% |
| TTN           | 7273      | 57.1% | 8.5%  | 21.6% | 29.1% |
| LOC57149      | 57149     | 25.2% | 15.8% | 46.2% | 29.1% |
| C6orf174      | 387104    | 41.3% | 26.2% | 19.7% | 29.1% |
| FLJ46299      | 166348    | 31.4% | 21.9% | 33.9% | 29.1% |
| IL6ST         | 3572      | 39.1% | 19.9% | 28.3% | 29.1% |
| ALKBH         | 8846      | 31.4% | 23.2% | 32.6% | 29.1% |
| SLCO1A2       | 6579      | 36.8% | 23.9% | 26.6% | 29.1% |
| NUP50         | 10762     | 35.3% | 27.9% | 24.1% | 29.1% |
| FSHB          | 2488      | 40.7% | 27.3% | 19.2% | 29.1% |
| DNAJB11       | 51726     | 21.9% | 31.4% | 33.9% | 29.1% |
| COPS4         | 51138     | 25.6% | 34.9% | 26.8% | 29.1% |
| KARS          | 3735      | 33.6% | 29.7% | 24.0% | 29.1% |
| SLC9A11       | 284525    | 35.8% | 17.0% | 34.5% | 29.1% |
| APH-1A        | 51107     | 28.9% | 26.1% | 32.2% | 29.1% |
| C14ORF102     | 55051     | 30.9% | 30.1% | 26.3% | 29.1% |
| YY1           | 7528      | 34.3% | 24.0% | 29.0% | 29.1% |
| EIF2B3        | 8891      | 31.5% | 28.6% | 27.2% | 29.1% |

|           |           |       |       |       |       |
|-----------|-----------|-------|-------|-------|-------|
| GPR30     | 2852      | 30.1% | 22.6% | 34.6% | 29.1% |
| FLJ22789  | 84190     | 26.4% | 28.3% | 32.6% | 29.1% |
| ACCN1     | 40        | 38.6% | 16.5% | 32.2% | 29.1% |
| STOM      | 2040      | 27.9% | 31.4% | 28.0% | 29.1% |
| HSPC268   | 154791    | 29.5% | 32.1% | 25.7% | 29.1% |
| C9ORF25   | 203259    | 33.4% | 21.8% | 32.1% | 29.1% |
| THUMPD3   | 25917     | 35.1% | 29.2% | 22.9% | 29.1% |
| HTR3B     | 9177      | 37.2% | 22.3% | 27.9% | 29.1% |
| C6ORF57   | 135154    | 25.8% | 31.1% | 30.4% | 29.1% |
| OSBPL2    | 9885      | 30.8% | 28.1% | 28.5% | 29.1% |
| HOXB3     | 3213      | 49.7% | 13.0% | 24.6% | 29.1% |
| ALOX12B   | 242       | 37.7% | 32.8% | 16.8% | 29.1% |
| HSPBP1    | 23640     | 33.0% | 24.4% | 29.9% | 29.1% |
| CCDC9     | 26093     | 28.7% | 24.5% | 34.2% | 29.1% |
| PRELP     | 5549      | 32.5% | 23.6% | 31.2% | 29.1% |
| IDUA      | 3425      | 18.9% | 37.5% | 30.9% | 29.1% |
| FLJ44968  | 374887    | 33.5% | 25.9% | 28.0% | 29.1% |
| NECAP1    | 25977     | 38.7% | 16.0% | 32.7% | 29.1% |
| MST1R     | 4486      | 35.6% | 28.0% | 23.7% | 29.1% |
| FLJ35776  | 649446    | 30.2% | 25.8% | 31.4% | 29.1% |
| DAZ2      | 57055     | 42.5% | 19.4% | 25.4% | 29.1% |
| PAPOLA    | 10914     | 35.0% | 24.2% | 28.1% | 29.1% |
| ETV3      | 2117      | 32.4% | 24.8% | 30.2% | 29.1% |
| CTRC      | 11330     | 24.7% | 26.7% | 36.0% | 29.1% |
| PNMA2     | 10687     | 35.4% | 21.6% | 30.4% | 29.1% |
| UHRF1     | 29128     | 41.8% | 25.3% | 20.2% | 29.1% |
| HSPA9B    | 3313      | 27.7% | 23.6% | 36.1% | 29.1% |
| ATF1      | 466       | 40.8% | 28.2% | 18.4% | 29.1% |
| SEPT1     | 1731      | 38.3% | 16.0% | 33.1% | 29.1% |
| IL3RA     | 3563      | 33.0% | 29.0% | 25.4% | 29.1% |
| VDAC3     | 7419      | 32.1% | 23.3% | 32.0% | 29.1% |
| MIST      | 116449    | 34.0% | 24.4% | 28.9% | 29.1% |
| PPFIBP1   | 8496      | 34.7% | 20.6% | 32.2% | 29.1% |
| Clorf186  | 440712    | 31.9% | 31.3% | 24.2% | 29.1% |
| TBC1D19   | 55296     | 36.3% | 32.9% | 18.3% | 29.1% |
| SH3BGRL   | 6451      | 28.6% | 25.6% | 33.2% | 29.1% |
| PTBP1     | 5725      | 33.6% | 21.3% | 32.5% | 29.1% |
| LSM5      | 23658     | 23.6% | 34.9% | 28.9% | 29.1% |
| KIAA0961  | 22835     | 26.3% | 31.1% | 30.1% | 29.1% |
| LAMP2     | 3920      | 47.7% | 22.1% | 17.6% | 29.1% |
| IFNA16    | 3449      | 39.5% | 20.5% | 27.5% | 29.1% |
| PHF20L1   | 51105     | 41.1% | 13.7% | 32.6% | 29.1% |
| CAB39L    | 81617     | 45.0% | 21.6% | 20.8% | 29.1% |
| ACBD3     | 64746     | 34.2% | 26.5% | 26.7% | 29.1% |
| SLC25A24  | 29957     | 33.9% | 29.2% | 24.3% | 29.1% |
| NUP37     | 79023     | 31.0% | 34.8% | 21.7% | 29.2% |
| RNF25     | 64320     | 35.3% | 25.3% | 26.9% | 29.2% |
| APRN      | 23047     | 41.8% | 16.5% | 29.1% | 29.2% |
| CITED4    | 163732    | 40.3% | 29.5% | 17.6% | 29.2% |
| BASP1     | 10409     | 31.7% | 23.2% | 32.5% | 29.2% |
| KIAA1012  | 22878     | 30.2% | 34.6% | 22.6% | 29.2% |
| EHD2      | 30846     | 34.8% | 28.1% | 24.6% | 29.2% |
| C6ORF165  | 154313    | 49.3% | 14.0% | 24.1% | 29.2% |
| ASK       | 10926     | 24.2% | 36.4% | 26.9% | 29.2% |
| UTF1      | 8433      | 39.1% | 24.1% | 24.3% | 29.2% |
| MGC4766   | 83639     | 16.1% | 33.9% | 37.5% | 29.2% |
| MGC29875  | 27042     | 33.9% | 30.9% | 22.6% | 29.2% |
| KIAA0319L | 79932     | 42.9% | 26.5% | 18.2% | 29.2% |
| ZNF24     | 7572      | 34.4% | 27.1% | 26.0% | 29.2% |
| ASAH2     | 56624     | 40.7% | 18.8% | 27.9% | 29.2% |
| API5      | 8539      | 35.4% | 25.6% | 26.6% | 29.2% |
| LOC388960 | 388960    | 30.8% | 19.0% | 37.7% | 29.2% |
| NUDT8     | 254552    | 34.2% | 27.2% | 26.1% | 29.2% |
| KIF27     | 55582     | 26.4% | 29.6% | 31.6% | 29.2% |
| CTAGE4    | 100128553 | 40.9% | 21.3% | 25.2% | 29.2% |
| CSNK2A2   | 1459      | 28.2% | 29.5% | 29.9% | 29.2% |
| MGC4170   | 79158     | 19.5% | 40.2% | 27.8% | 29.2% |
| LOC729440 | 729440    | 21.6% | 36.3% | 29.6% | 29.2% |
| USP45     | 85015     | 30.2% | 29.9% | 27.4% | 29.2% |
| FGF2      | 2247      | 37.8% | 20.0% | 29.8% | 29.2% |
| KLK7      | 5650      | 27.6% | 29.5% | 30.5% | 29.2% |
| IL2       | 3558      | 22.7% | 35.9% | 29.0% | 29.2% |
| XPO6      | 23214     | 41.8% | 18.0% | 27.8% | 29.2% |
| PI4K2B    | 55300     | 30.3% | 27.6% | 29.7% | 29.2% |
| PAICS     | 10606     | 38.3% | 19.8% | 29.5% | 29.2% |
| SIGLEC6   | 946       | 31.3% | 19.0% | 37.3% | 29.2% |
| CGI-111   | 51015     | 33.6% | 28.1% | 25.9% | 29.2% |
| PDCD4     | 27250     | 42.3% | 16.9% | 28.4% | 29.2% |
| EDARADD   | 128178    | 34.2% | 32.0% | 21.4% | 29.2% |
| OR10C1    | 442194    | 34.9% | 23.4% | 29.2% | 29.2% |
| TMC5      | 79838     | 32.8% | 32.1% | 22.7% | 29.2% |
| OR4C15    | 81309     | 39.6% | 17.6% | 30.4% | 29.2% |
| MRPS33    | 51650     | 40.8% | 21.5% | 25.3% | 29.2% |
| MORF4L1   | 10933     | 25.4% | 31.1% | 31.1% | 29.2% |
| CDKL5     | 6792      | 29.6% | 28.1% | 29.9% | 29.2% |
| CAPS      | 828       | 29.7% | 22.7% | 35.2% | 29.2% |
| VCX3      | 51481     | 31.3% | 30.9% | 25.5% | 29.2% |
| ILT8      | 79168     | 25.2% | 23.9% | 38.5% | 29.2% |
| PCDHGA1   | 56114     | 36.9% | 33.0% | 17.7% | 29.2% |
| SMARCA4   | 6597      | 40.0% | 19.2% | 28.4% | 29.2% |
| CHRN4     | 1143      | 37.6% | 18.8% | 31.2% | 29.2% |
| KIAA1755  | 85449     | 29.7% | 22.1% | 35.8% | 29.2% |
| KRTHB5    | 3891      | 26.5% | 23.9% | 37.2% | 29.2% |
| ARID3A    | 1820      | 25.4% | 30.2% | 32.0% | 29.2% |
| FLJ31579  | 257068    | 39.0% | 22.8% | 25.9% | 29.2% |
| CG018     | 90634     | 34.4% | 26.0% | 27.2% | 29.2% |
| C19ORF33  | 64073     | 34.6% | 34.9% | 18.2% | 29.2% |
| MGC33530  | 222008    | 23.3% | 26.2% | 38.2% | 29.2% |

|               |        |       |       |       |       |
|---------------|--------|-------|-------|-------|-------|
| FAM64A        | 54478  | 43.4% | 19.9% | 24.3% | 29.2% |
| CPOX          | 1371   | 36.0% | 20.3% | 31.4% | 29.2% |
| DNTT1P1       | 116092 | 19.8% | 27.3% | 40.5% | 29.2% |
| LUC7L2        | 51631  | 30.9% | 28.8% | 28.0% | 29.2% |
| KIAA1086      | 23217  | 38.0% | 27.5% | 22.2% | 29.2% |
| KRT17         | 3872   | 20.4% | 25.8% | 41.5% | 29.2% |
| DEPDC4        | 120863 | 32.2% | 30.9% | 24.5% | 29.2% |
| ENDOGL1       | 9941   | 35.4% | 31.9% | 20.4% | 29.2% |
| HOOK1         | 51361  | 28.8% | 21.7% | 37.2% | 29.2% |
| DEFA6         | 1671   | 48.0% | 17.1% | 22.6% | 29.2% |
| HIBCH         | 26275  | 26.9% | 29.9% | 31.0% | 29.2% |
| DEFB111       | 245914 | 28.3% | 21.9% | 37.4% | 29.2% |
| HEL308        | 113510 | 37.6% | 12.2% | 37.9% | 29.2% |
| RPS25         | 6230   | 34.0% | 25.0% | 28.8% | 29.2% |
| NCKAP1        | 10787  | 30.1% | 23.7% | 33.9% | 29.2% |
| PPM1H         | 57460  | 38.3% | 32.6% | 16.8% | 29.2% |
| ZNF546        | 339327 | 37.6% | 29.5% | 20.6% | 29.2% |
| SLC4A4        | 8671   | 33.3% | 35.8% | 18.6% | 29.2% |
| RAB28         | 9364   | 32.8% | 19.4% | 35.6% | 29.2% |
| GYLTL1B       | 120071 | 22.1% | 30.1% | 35.6% | 29.2% |
| OR5L1         | 219437 | 37.1% | 22.3% | 28.3% | 29.2% |
| ACAS2         | 55902  | 40.5% | 15.1% | 32.1% | 29.2% |
| OR2L2         | 26246  | 28.9% | 30.4% | 28.4% | 29.2% |
| RBM3          | 5935   | 36.1% | 22.7% | 28.9% | 29.2% |
| DPEP3         | 64180  | 29.4% | 38.2% | 20.1% | 29.3% |
| THY28         | 29087  | 42.0% | 13.3% | 32.4% | 29.3% |
| FLJ11273      | 54664  | 24.4% | 15.6% | 47.7% | 29.3% |
| KIAA1841      | 84542  | 26.0% | 18.3% | 43.5% | 29.3% |
| PER1          | 5187   | 38.0% | 28.9% | 20.9% | 29.3% |
| NEFL          | 4747   | 31.1% | 33.3% | 23.4% | 29.3% |
| DDHD2         | 23259  | 30.4% | 29.8% | 27.6% | 29.3% |
| GDF5          | 8200   | 40.4% | 17.5% | 29.8% | 29.3% |
| BPNT1         | 10380  | 23.7% | 37.5% | 26.6% | 29.3% |
| C20ORF142     | 128486 | 31.7% | 37.4% | 18.6% | 29.3% |
| MSH2          | 4436   | 36.0% | 27.1% | 24.7% | 29.3% |
| C13ORF12      | 51371  | 35.8% | 22.1% | 29.9% | 29.3% |
| CDC7          | 8317   | 32.6% | 32.0% | 23.2% | 29.3% |
| FLJ40919      | 144809 | 25.1% | 34.6% | 28.2% | 29.3% |
| MRPS22        | 56945  | 37.2% | 20.2% | 30.4% | 29.3% |
| CHES1         | 1112   | 33.0% | 30.6% | 24.2% | 29.3% |
| SLC35E2       | 9906   | 31.2% | 24.2% | 32.3% | 29.3% |
| ZNF284        | 342909 | 35.9% | 22.5% | 29.5% | 29.3% |
| OR8B4         | 283162 | 36.7% | 24.5% | 26.7% | 29.3% |
| ZNF544        | 27300  | 35.3% | 25.1% | 27.4% | 29.3% |
| DKFZP686E2158 | 643155 | 33.5% | 24.6% | 29.7% | 29.3% |
| C13ORF8       | 283489 | 36.2% | 20.6% | 31.0% | 29.3% |
| MAGEB3        | 4114   | 35.8% | 36.6% | 15.4% | 29.3% |
| TLX1          | 3195   | 33.9% | 25.2% | 28.8% | 29.3% |
| ADRA1A        | 148    | 31.8% | 25.7% | 30.3% | 29.3% |
| TM45F4        | 7104   | 32.0% | 25.6% | 30.3% | 29.3% |
| APAF1         | 317    | 29.9% | 36.5% | 21.5% | 29.3% |
| POTEB         | 340441 | 36.4% | 24.6% | 26.8% | 29.3% |
| UQCRC1        | 7384   | 29.2% | 25.4% | 33.3% | 29.3% |
| HGNT-IV-H     | 25834  | 23.9% | 31.7% | 32.3% | 29.3% |
| LCA10         | 643736 | 35.3% | 13.4% | 39.2% | 29.3% |
| HKE2          | 10471  | 27.2% | 20.2% | 40.5% | 29.3% |
| LOC389123     | 389123 | 30.9% | 25.8% | 31.2% | 29.3% |
| LOC345778     | 345778 | 30.0% | 17.6% | 40.3% | 29.3% |
| COL25A1       | 84570  | 38.8% | 22.5% | 26.6% | 29.3% |
| LOC400757     | 400757 | 36.2% | 14.6% | 37.2% | 29.3% |
| FAM13C1       | 220965 | 33.4% | 27.5% | 27.0% | 29.3% |
| GBF1          | 8729   | 38.6% | 20.8% | 28.4% | 29.3% |
| KIAA1285      | 27153  | 22.2% | 29.2% | 36.4% | 29.3% |
| RAB7B         | 338382 | 27.7% | 29.0% | 31.2% | 29.3% |
| TSCOT         | 57864  | 42.7% | 11.2% | 34.1% | 29.3% |
| PP3111        | 64118  | 35.1% | 13.0% | 39.9% | 29.3% |
| MRPL53        | 116540 | 35.5% | 30.4% | 22.0% | 29.3% |
| NOL6          | 65083  | 29.2% | 24.0% | 34.7% | 29.3% |
| DEC1          | 50514  | 49.4% | 20.7% | 17.8% | 29.3% |
| PLK4          | 10733  | 14.3% | 42.9% | 30.8% | 29.3% |
| ZNF614        | 80110  | 31.5% | 24.0% | 32.5% | 29.3% |
| JARID1D       | 8284   | 29.9% | 17.6% | 40.5% | 29.3% |
| AP3D1         | 8943   | 32.3% | 28.2% | 27.4% | 29.3% |
| MICL          | 160364 | 36.5% | 25.4% | 26.1% | 29.3% |
| TMEM30A       | 55754  | 52.2% | 19.2% | 16.5% | 29.3% |
| BRD9          | 65980  | 37.9% | 22.0% | 28.0% | 29.3% |
| ARRDC4        | 91947  | 34.1% | 25.3% | 28.5% | 29.3% |
| TACSTD2       | 4070   | 37.2% | 28.8% | 21.9% | 29.3% |
| AXIN2         | 8313   | 26.7% | 34.5% | 26.8% | 29.3% |
| TAS2R50       | 259296 | 29.9% | 26.2% | 31.8% | 29.3% |
| MOV10L1       | 54456  | 34.5% | 24.8% | 28.6% | 29.3% |
| ALDH4A1       | 8659   | 27.7% | 29.2% | 31.1% | 29.3% |
| CYBB          | 1536   | 25.0% | 29.6% | 33.3% | 29.3% |
| EDN3          | 1908   | 38.0% | 19.6% | 30.3% | 29.3% |
| MLLT7         | 4303   | 44.6% | 19.5% | 23.9% | 29.3% |
| POMC          | 5443   | 35.5% | 20.8% | 31.6% | 29.3% |
| CT45-6        | 541465 | 34.0% | 26.0% | 28.1% | 29.3% |
| PSME1         | 5720   | 27.3% | 21.8% | 38.8% | 29.3% |
| CCDC50        | 152137 | 46.2% | 24.0% | 17.9% | 29.3% |
| LOC348262     | 348262 | 31.3% | 31.9% | 24.8% | 29.3% |
| ROCK2         | 9475   | 30.9% | 33.6% | 23.5% | 29.3% |
| SLC37A3       | 84255  | 40.8% | 23.0% | 24.2% | 29.3% |
| LOC440295     | 440295 | 37.9% | 28.8% | 21.4% | 29.3% |
| RAPGEFL1      | 51195  | 38.8% | 22.9% | 26.3% | 29.3% |
| OR8G2         | 26492  | 29.7% | 28.8% | 29.5% | 29.3% |
| OR7C2         | 26658  | 32.6% | 26.9% | 28.5% | 29.3% |
| SETMAR        | 6419   | 27.9% | 32.0% | 28.1% | 29.3% |
| MGC13204      | 83695  | 35.5% | 22.9% | 29.6% | 29.3% |

|               |        |       |       |       |       |
|---------------|--------|-------|-------|-------|-------|
| OR2M4         | 26245  | 39.2% | 22.6% | 26.2% | 29.3% |
| WFS1          | 7466   | 34.3% | 28.4% | 25.3% | 29.3% |
| LRRC25        | 126364 | 38.5% | 23.1% | 26.4% | 29.3% |
| FBXL22        | 283807 | 24.6% | 33.0% | 30.4% | 29.3% |
| APC2          | 10297  | 33.8% | 28.9% | 25.3% | 29.3% |
| KPNA6         | 23633  | 38.5% | 19.0% | 30.6% | 29.3% |
| DESR1         | 285381 | 27.8% | 22.8% | 37.4% | 29.4% |
| TINAG         | 27283  | 37.6% | 24.9% | 25.5% | 29.4% |
| TXNDG6        | 347736 | 48.4% | 8.3%  | 31.3% | 29.4% |
| C10ORF63      | 219670 | 36.8% | 21.8% | 29.5% | 29.4% |
| POU3F2        | 5454   | 33.6% | 31.0% | 23.5% | 29.4% |
| C10ORF84      | 63877  | 46.2% | 14.3% | 27.6% | 29.4% |
| NIBP          | 83696  | 37.0% | 27.0% | 24.1% | 29.4% |
| ZNF22         | 7570   | 35.4% | 21.0% | 31.8% | 29.4% |
| GAD2          | 2572   | 35.5% | 20.6% | 32.0% | 29.4% |
| DOCK4         | 9732   | 34.3% | 21.7% | 32.1% | 29.4% |
| MGC1136       | 78986  | 33.3% | 28.8% | 26.0% | 29.4% |
| CHRA1         | 54108  | 41.7% | 13.6% | 32.8% | 29.4% |
| ZNF433        | 163059 | 32.1% | 29.8% | 26.3% | 29.4% |
| MDK           | 4192   | 35.4% | 16.4% | 36.2% | 29.4% |
| GUCA1B        | 2979   | 37.4% | 29.7% | 21.1% | 29.4% |
| HNRPR         | 10236  | 26.8% | 28.4% | 32.9% | 29.4% |
| RAB35         | 11021  | 37.7% | 21.8% | 28.6% | 29.4% |
| DDX4          | 54514  | 34.4% | 20.7% | 33.0% | 29.4% |
| KIRREL3       | 84623  | 27.5% | 22.7% | 38.0% | 29.4% |
| EMID1         | 129080 | 36.2% | 22.4% | 29.6% | 29.4% |
| KCNA4         | 3739   | 33.1% | 36.7% | 18.3% | 29.4% |
| ZNF552        | 79818  | 35.3% | 29.7% | 23.1% | 29.4% |
| TRUB1         | 142940 | 32.3% | 25.0% | 30.8% | 29.4% |
| CSPG5         | 10675  | 33.3% | 30.2% | 24.6% | 29.4% |
| FOXP2         | 93986  | 40.7% | 19.8% | 27.7% | 29.4% |
| SOAT1         | 6646   | 21.6% | 34.6% | 32.0% | 29.4% |
| OSTF1         | 26578  | 29.5% | 29.9% | 28.8% | 29.4% |
| UNC13D        | 201294 | 42.4% | 17.1% | 28.7% | 29.4% |
| FBXO39        | 162517 | 29.5% | 25.8% | 32.9% | 29.4% |
| DAAM2         | 23500  | 38.2% | 18.8% | 31.2% | 29.4% |
| DESC1         | 28983  | 29.4% | 26.4% | 32.3% | 29.4% |
| ANP32B        | 10541  | 35.9% | 27.6% | 24.6% | 29.4% |
| MAGEA5        | 4104   | 31.2% | 34.2% | 22.8% | 29.4% |
| RAD50         | 10111  | 38.8% | 20.8% | 28.6% | 29.4% |
| KLHL9         | 55958  | 39.9% | 27.1% | 21.1% | 29.4% |
| DAD1          | 1603   | 40.8% | 25.9% | 21.5% | 29.4% |
| EFCBP2        | 54550  | 38.4% | 30.1% | 19.7% | 29.4% |
| AP3B2         | 8120   | 25.0% | 32.3% | 30.9% | 29.4% |
| FLJ37538      | 222950 | 28.1% | 23.5% | 36.5% | 29.4% |
| DKFZP564K1964 | 26022  | 30.3% | 26.5% | 31.4% | 29.4% |
| DPM1          | 8813   | 37.7% | 27.2% | 23.3% | 29.4% |
| LOC150678     | 150678 | 27.7% | 30.1% | 30.4% | 29.4% |
| RYR1          | 6261   | 29.8% | 23.4% | 35.0% | 29.4% |
| PLAC9         | 219348 | 30.4% | 29.9% | 27.9% | 29.4% |
| GRSF1         | 2926   | 40.6% | 18.8% | 28.8% | 29.4% |
| NCOA2         | 10499  | 32.7% | 26.1% | 29.4% | 29.4% |
| SERPINA9      | 327657 | 37.0% | 24.7% | 26.6% | 29.4% |
| CREG          | 8804   | 22.5% | 30.1% | 35.6% | 29.4% |
| C9orf128      | 392307 | 17.5% | 36.0% | 34.8% | 29.4% |
| ADPN          | 80339  | 39.0% | 21.5% | 27.7% | 29.4% |
| AB026190      | 27252  | 20.3% | 27.5% | 40.4% | 29.4% |
| LOC91353      | 91353  | 27.0% | 22.3% | 39.0% | 29.4% |
| GPR149        | 344758 | 26.1% | 28.1% | 34.0% | 29.4% |
| ZP2           | 7783   | 29.4% | 30.1% | 28.8% | 29.4% |
| MGC62100      | 388536 | 27.7% | 33.0% | 27.5% | 29.4% |
| GYG           | 2992   | 22.5% | 29.3% | 36.4% | 29.4% |
| FANCL         | 55120  | 43.6% | 24.1% | 20.6% | 29.4% |
| CX3CL1        | 6376   | 26.7% | 34.8% | 26.8% | 29.4% |
| RNF180        | 285671 | 37.3% | 23.3% | 27.7% | 29.4% |
| GPR75         | 10936  | 29.1% | 33.3% | 25.8% | 29.4% |
| ZFYVE16       | 9765   | 30.5% | 27.7% | 30.1% | 29.4% |
| RFPL3         | 10738  | 32.2% | 31.4% | 24.7% | 29.4% |
| TOPORS        | 10210  | 36.0% | 21.3% | 31.0% | 29.4% |
| LMO3          | 55885  | 31.3% | 36.8% | 20.2% | 29.4% |
| CHAT          | 1103   | 36.3% | 26.0% | 26.0% | 29.4% |
| SERHL2        | 253190 | 33.3% | 24.2% | 30.8% | 29.4% |
| NRF           | 55922  | 34.4% | 18.8% | 35.2% | 29.4% |
| GNA13         | 10672  | 31.6% | 33.0% | 23.7% | 29.4% |
| FLJ90650      | 206338 | 45.2% | 22.0% | 21.2% | 29.4% |
| GNG4          | 2786   | 31.0% | 27.0% | 30.4% | 29.4% |
| COL15A1       | 1306   | 44.5% | 24.6% | 19.2% | 29.4% |
| KIAA1324      | 57535  | 27.3% | 40.0% | 21.1% | 29.4% |
| ZNF426        | 79088  | 31.2% | 30.0% | 27.1% | 29.4% |
| MIB1          | 57534  | 35.9% | 26.5% | 25.9% | 29.4% |
| HLA-A         | 3105   | 37.1% | 23.0% | 28.2% | 29.4% |
| FAM14A        | 83982  | 33.9% | 31.3% | 23.1% | 29.4% |
| PRAMEF8       | 391002 | 37.6% | 14.3% | 36.5% | 29.4% |
| HIST1H2AB     | 8335   | 34.3% | 31.4% | 22.6% | 29.4% |
| LAMC2         | 3918   | 43.6% | 25.3% | 19.5% | 29.4% |
| LOC285498     | 285498 | 20.4% | 27.8% | 40.2% | 29.4% |
| CD33          | 945    | 35.7% | 25.0% | 27.6% | 29.4% |
| FLJ27505      | 389320 | 32.0% | 22.3% | 34.0% | 29.4% |
| PCDH20        | 64881  | 31.3% | 34.2% | 22.9% | 29.4% |
| POLIP2        | 26073  | 34.3% | 27.5% | 26.5% | 29.4% |
| SEPN1         | 57190  | 42.1% | 19.4% | 26.8% | 29.4% |
| GNAO1         | 2775   | 22.7% | 33.4% | 32.2% | 29.4% |
| DNPEP         | 23549  | 35.6% | 28.4% | 24.3% | 29.4% |
| C6ORF25       | 80739  | 23.3% | 40.4% | 24.6% | 29.5% |
| PCDH11Y       | 83259  | 33.3% | 26.3% | 28.7% | 29.5% |
| PALM          | 5064   | 36.4% | 28.1% | 23.8% | 29.5% |
| PLEKHF1       | 79156  | 41.8% | 26.3% | 20.3% | 29.5% |
| WWP1          | 11059  | 32.2% | 32.6% | 23.6% | 29.5% |

|               |        |       |       |       |       |
|---------------|--------|-------|-------|-------|-------|
| FLJ21865      | 64772  | 28.6% | 27.8% | 32.0% | 29.5% |
| RANGAP1       | 5905   | 28.8% | 39.9% | 19.7% | 29.5% |
| HMGCS1        | 3157   | 42.6% | 14.7% | 31.1% | 29.5% |
| PC-3          | 692094 | 36.3% | 24.4% | 27.7% | 29.5% |
| KIAA0153      | 23170  | 26.2% | 22.9% | 39.3% | 29.5% |
| HCCR1         | 25875  | 32.8% | 22.5% | 33.2% | 29.5% |
| TAS1R3        | 83756  | 35.1% | 23.9% | 29.4% | 29.5% |
| COQ7          | 10229  | 28.3% | 25.6% | 34.6% | 29.5% |
| CREB3         | 10488  | 37.1% | 30.5% | 20.8% | 29.5% |
| CAPN2         | 824    | 35.3% | 34.5% | 18.6% | 29.5% |
| UNC45B        | 146862 | 37.0% | 24.3% | 27.1% | 29.5% |
| EFHC1         | 114327 | 33.1% | 25.2% | 30.1% | 29.5% |
| LOC150297     | 150297 | 30.6% | 21.4% | 36.5% | 29.5% |
| SKIIP         | 22938  | 36.2% | 23.8% | 28.5% | 29.5% |
| CRH           | 1392   | 36.6% | 21.1% | 30.8% | 29.5% |
| TMEM5         | 10329  | 36.4% | 18.2% | 33.9% | 29.5% |
| PAFAH1B1      | 5048   | 36.8% | 30.2% | 21.4% | 29.5% |
| NUDT11        | 55190  | 37.0% | 26.1% | 25.3% | 29.5% |
| FGF21         | 26291  | 30.6% | 26.9% | 31.0% | 29.5% |
| PDZK1         | 5174   | 35.3% | 23.8% | 29.4% | 29.5% |
| NUDT12        | 83594  | 28.9% | 26.6% | 33.0% | 29.5% |
| DKFZP686G0786 | 163351 | 33.2% | 21.1% | 34.1% | 29.5% |
| ZNRF1         | 84937  | 37.3% | 22.1% | 29.1% | 29.5% |
| TPR           | 7175   | 31.2% | 16.4% | 40.9% | 29.5% |
| DOCK2         | 1794   | 38.6% | 22.9% | 27.0% | 29.5% |
| ANKK1         | 255239 | 36.5% | 26.8% | 25.2% | 29.5% |
| TTC11         | 51024  | 33.3% | 21.7% | 33.4% | 29.5% |
| FLJ32675      | 283254 | 29.6% | 26.2% | 32.7% | 29.5% |
| DDX31         | 64794  | 30.6% | 23.7% | 34.2% | 29.5% |
| FLJ20359      | 54905  | 19.2% | 33.3% | 35.9% | 29.5% |
| MAP3K14       | 9020   | 28.0% | 28.4% | 32.2% | 29.5% |
| MGC34725      | 284427 | 30.0% | 23.3% | 35.2% | 29.5% |
| MGC64882      | 348793 | 25.1% | 25.6% | 37.8% | 29.5% |
| SPG6          | 123606 | 27.2% | 24.5% | 36.9% | 29.5% |
| SCARF2        | 91179  | 28.3% | 31.7% | 28.6% | 29.5% |
| FGFR3         | 2261   | 30.8% | 31.6% | 26.2% | 29.5% |
| MTMR2         | 8898   | 29.3% | 33.7% | 25.6% | 29.5% |
| SYN1          | 6853   | 37.5% | 23.8% | 27.2% | 29.5% |
| YWHAQ         | 10971  | 33.6% | 27.3% | 27.6% | 29.5% |
| TBC1D3        | 84218  | 38.3% | 29.2% | 21.0% | 29.5% |
| C22ORF16      | 400916 | 23.6% | 30.4% | 34.5% | 29.5% |
| FLJ11259      | 55332  | 26.7% | 19.5% | 42.4% | 29.5% |
| AQP6          | 363    | 33.3% | 25.1% | 30.2% | 29.5% |
| FLJ22167      | 79583  | 40.8% | 19.4% | 28.4% | 29.5% |
| ACOX1         | 51     | 41.2% | 22.8% | 24.6% | 29.5% |
| GORASP1       | 64689  | 36.4% | 28.0% | 24.2% | 29.5% |
| CTL2          | 57153  | 37.5% | 20.4% | 30.7% | 29.5% |
| IL18R1        | 8809   | 30.0% | 23.6% | 34.9% | 29.5% |
| CBX1          | 10951  | 38.2% | 22.9% | 27.4% | 29.5% |
| CRYGD         | 1421   | 35.1% | 30.7% | 22.8% | 29.5% |
| TPD52L1       | 7164   | 39.4% | 23.4% | 25.8% | 29.5% |
| SMAD9         | 4093   | 32.4% | 20.3% | 35.9% | 29.5% |
| RASA3         | 22821  | 33.8% | 24.8% | 30.0% | 29.5% |
| CLTA          | 1211   | 20.7% | 39.7% | 28.2% | 29.5% |
| FLJ37794      | 283284 | 27.0% | 27.6% | 34.0% | 29.5% |
| KRTAP5-4      | 387267 | 31.7% | 26.1% | 30.9% | 29.5% |
| CRSP7         | 9441   | 25.0% | 34.1% | 29.5% | 29.5% |
| ALF           | 11036  | 43.2% | 19.8% | 25.7% | 29.5% |
| ZNF406        | 57623  | 22.4% | 21.3% | 44.9% | 29.5% |
| DFNB31        | 25861  | 28.6% | 29.4% | 30.6% | 29.5% |
| ZNF267        | 10308  | 37.8% | 32.3% | 18.5% | 29.5% |
| C14ORF142     | 84520  | 36.8% | 23.9% | 27.9% | 29.5% |
| CAPN6         | 827    | 33.0% | 28.2% | 27.4% | 29.6% |
| KIAA1728      | 85461  | 42.2% | 22.1% | 24.3% | 29.6% |
| CGI-119       | 51643  | 30.2% | 30.6% | 27.9% | 29.6% |
| MRPS21        | 54460  | 39.5% | 31.3% | 17.9% | 29.6% |
| CBX5          | 23468  | 41.5% | 29.8% | 17.4% | 29.6% |
| SMAD4         | 4089   | 37.4% | 23.5% | 27.7% | 29.6% |
| ZNF187        | 7741   | 38.2% | 24.1% | 26.3% | 29.6% |
| PPP2R3A       | 5523   | 29.0% | 33.5% | 26.2% | 29.6% |
| C14ORF105     | 55195  | 30.9% | 29.9% | 27.9% | 29.6% |
| RLBP1         | 6017   | 39.2% | 23.6% | 25.8% | 29.6% |
| HSPC196       | 51524  | 26.5% | 22.4% | 39.7% | 29.6% |
| GALNS         | 2588   | 32.1% | 31.2% | 25.4% | 29.6% |
| NDUF89        | 4715   | 38.8% | 23.7% | 26.2% | 29.6% |
| FOXH1         | 8928   | 46.5% | 19.4% | 22.8% | 29.6% |
| MGC10334      | 80772  | 34.7% | 28.3% | 25.7% | 29.6% |
| C10QTNF1      | 114897 | 37.2% | 22.7% | 28.9% | 29.6% |
| FLJ20719      | 55672  | 25.9% | 34.9% | 28.0% | 29.6% |
| CGI-38        | 51673  | 29.2% | 28.5% | 31.1% | 29.6% |
| C20ORF31      | 55741  | 33.1% | 27.2% | 28.4% | 29.6% |
| PCDHA6        | 56142  | 26.7% | 28.6% | 33.5% | 29.6% |
| GOLGA1        | 2800   | 28.0% | 30.5% | 30.2% | 29.6% |
| GBA3          | 57733  | 26.3% | 32.7% | 29.8% | 29.6% |
| HDLBP         | 3069   | 31.6% | 22.0% | 35.2% | 29.6% |
| ZNF181        | 339318 | 18.4% | 24.3% | 46.0% | 29.6% |
| TAGAP         | 117289 | 50.0% | 19.2% | 19.5% | 29.6% |
| C1ORF51       | 148523 | 36.9% | 19.0% | 32.8% | 29.6% |
| THAP10        | 56906  | 26.0% | 37.1% | 25.6% | 29.6% |
| NEK2          | 4751   | 25.8% | 34.2% | 28.8% | 29.6% |
| S100P         | 6286   | 28.7% | 13.7% | 46.3% | 29.6% |
| AMACO         | 340706 | 24.4% | 28.8% | 35.6% | 29.6% |
| SELP          | 6403   | 28.6% | 33.5% | 26.7% | 29.6% |
| HBQ1          | 3049   | 48.9% | 25.0% | 14.9% | 29.6% |
| EN1           | 2019   | 45.5% | 20.0% | 23.3% | 29.6% |
| PP9099        | 80301  | 20.4% | 31.7% | 36.7% | 29.6% |
| OXA1L         | 5018   | 39.9% | 31.9% | 17.0% | 29.6% |
| PARVG         | 64098  | 42.0% | 25.2% | 21.6% | 29.6% |



|               |           |       |       |       |       |
|---------------|-----------|-------|-------|-------|-------|
| FLJ32978      | 128025    | 22.7% | 32.5% | 33.6% | 29.6% |
| H1T2          | 341567    | 31.4% | 22.0% | 35.5% | 29.6% |
| RPESP         | 157869    | 43.7% | 14.8% | 30.3% | 29.6% |
| MMD           | 23531     | 46.4% | 16.6% | 25.9% | 29.6% |
| WDR7          | 23335     | 40.9% | 33.3% | 14.5% | 29.6% |
| PAG           | 55824     | 27.0% | 24.4% | 37.4% | 29.6% |
| FLJ14681      | 84910     | 29.8% | 24.0% | 35.0% | 29.6% |
| MGC12458      | 84288     | 22.7% | 33.0% | 33.1% | 29.6% |
| AFG3L2        | 10939     | 23.4% | 30.9% | 34.5% | 29.6% |
| ETNK1         | 55500     | 27.9% | 28.9% | 32.0% | 29.6% |
| FLJ20989      | 65265     | 26.0% | 29.1% | 33.7% | 29.6% |
| TESK1         | 7016      | 13.4% | 47.9% | 27.4% | 29.6% |
| APP           | 351       | 37.2% | 21.7% | 29.9% | 29.6% |
| LOC100037417  | 100037417 | 32.5% | 28.9% | 27.4% | 29.6% |
| DKFZP761A078  | 163786    | 29.5% | 24.3% | 35.0% | 29.6% |
| SHARPIN       | 81858     | 37.8% | 36.7% | 14.3% | 29.6% |
| IL31RA        | 133396    | 26.3% | 33.1% | 29.4% | 29.6% |
| LOC201243     | 201243    | 24.2% | 18.0% | 46.6% | 29.6% |
| WHSC2         | 7469      | 27.8% | 31.7% | 29.4% | 29.6% |
| DES           | 1674      | 30.3% | 21.4% | 37.2% | 29.6% |
| FAM43A        | 131583    | 40.4% | 27.1% | 21.3% | 29.6% |
| HIST1H4G      | 8369      | 28.5% | 24.1% | 36.2% | 29.6% |
| NFYC          | 4802      | 41.4% | 20.5% | 26.9% | 29.6% |
| PEO1          | 56652     | 42.3% | 15.8% | 30.8% | 29.6% |
| SYCP1         | 6847      | 35.6% | 26.1% | 27.1% | 29.6% |
| PCDH12        | 51294     | 27.2% | 28.5% | 33.1% | 29.6% |
| DNM1L         | 10059     | 30.4% | 25.6% | 32.9% | 29.6% |
| EP400         | 57634     | 25.0% | 29.8% | 34.0% | 29.6% |
| WBSCR14       | 51085     | 40.9% | 19.4% | 28.5% | 29.6% |
| PHYHD1        | 254295    | 25.8% | 27.8% | 35.3% | 29.6% |
| DKFZP761D0211 | 83986     | 22.0% | 30.7% | 36.2% | 29.6% |
| HES7          | 84667     | 29.9% | 24.2% | 34.7% | 29.6% |
| CUL7          | 9820      | 31.1% | 25.2% | 32.5% | 29.6% |
| C4BPB         | 725       | 39.6% | 20.0% | 29.2% | 29.6% |
| CAB45         | 51150     | 31.4% | 23.9% | 33.6% | 29.6% |
| STARDBNL      | 83930     | 47.6% | 25.7% | 15.7% | 29.6% |
| BCL2L12       | 83596     | 24.6% | 33.1% | 31.2% | 29.6% |
| FLJ40201      | 163747    | 15.8% | 37.7% | 35.5% | 29.6% |
| ZNF346        | 23567     | 34.2% | 31.1% | 23.6% | 29.6% |
| ANKRD25       | 25959     | 35.0% | 26.6% | 27.3% | 29.6% |
| LOC613212     | 613212    | 33.1% | 32.4% | 23.4% | 29.6% |
| BTN2A2        | 10385     | 36.1% | 27.9% | 24.9% | 29.6% |
| FLJ44054      | 643365    | 34.3% | 19.8% | 34.8% | 29.6% |
| FLJ23506      | 79891     | 22.5% | 29.1% | 37.2% | 29.6% |
| LOC146845     | 146845    | 26.4% | 22.8% | 39.6% | 29.6% |
| CLN3          | 1201      | 37.3% | 28.3% | 23.3% | 29.6% |
| TLL2          | 7093      | 34.8% | 23.3% | 30.9% | 29.6% |
| UNKL          | 64718     | 35.7% | 29.8% | 23.4% | 29.6% |
| GPR158L1      | 440435    | 37.6% | 20.2% | 31.2% | 29.6% |
| FLJ20772      | 55039     | 17.9% | 33.3% | 37.7% | 29.6% |
| LOC343702     | 343702    | 33.3% | 17.6% | 37.9% | 29.6% |
| RNF103        | 7844      | 35.8% | 22.1% | 31.0% | 29.6% |
| HIST1H2AA     | 221613    | 34.8% | 24.6% | 29.5% | 29.6% |
| SERINC4       | 619189    | 39.3% | 27.7% | 21.9% | 29.6% |
| ACVR2B        | 93        | 24.1% | 31.0% | 33.9% | 29.6% |
| NOVA2         | 4858      | 33.2% | 32.5% | 23.3% | 29.6% |
| URB           | 151887    | 32.0% | 23.3% | 33.6% | 29.6% |
| IFNA13        | 3447      | 34.8% | 29.1% | 25.1% | 29.6% |
| PNUTL2        | 5414      | 31.9% | 24.2% | 32.8% | 29.6% |
| PYGO1         | 26108     | 33.2% | 22.3% | 33.4% | 29.6% |
| KIAA0720      | 57449     | 36.0% | 30.3% | 22.7% | 29.6% |
| FLJ44894      | 664701    | 33.9% | 30.6% | 24.4% | 29.6% |
| C14ORF79      | 122616    | 36.1% | 28.0% | 24.8% | 29.6% |
| MAPK13        | 5603      | 26.1% | 30.3% | 32.6% | 29.6% |
| FADS2         | 9415      | 30.3% | 26.2% | 32.4% | 29.6% |
| DKFZP761N1114 | 148808    | 25.0% | 24.6% | 39.4% | 29.7% |
| AP3M1         | 26985     | 32.0% | 26.7% | 30.2% | 29.7% |
| ATF4          | 468       | 38.9% | 28.4% | 21.7% | 29.7% |
| ANKRD29       | 147463    | 30.6% | 23.2% | 35.2% | 29.7% |
| VSNL1         | 7447      | 18.4% | 32.7% | 37.8% | 29.7% |
| RNF167        | 26001     | 35.8% | 37.6% | 15.6% | 29.7% |
| HACE1         | 57531     | 41.1% | 18.5% | 29.3% | 29.7% |
| KIAA0853      | 23091     | 33.3% | 22.2% | 33.4% | 29.7% |
| TSPAN12       | 23554     | 36.4% | 33.2% | 19.4% | 29.7% |
| FLJ13063      | 79798     | 24.6% | 20.9% | 43.5% | 29.7% |
| DNCL1         | 51143     | 33.8% | 23.1% | 32.0% | 29.7% |
| POLQ          | 10721     | 41.4% | 24.1% | 23.5% | 29.7% |
| FLJ25393      | 159989    | 21.2% | 35.5% | 32.3% | 29.7% |
| AGL           | 178       | 35.1% | 27.5% | 26.5% | 29.7% |
| DSCR6         | 53820     | 24.1% | 22.9% | 42.0% | 29.7% |
| PROK2         | 60675     | 31.5% | 24.0% | 33.4% | 29.7% |
| CECR1         | 51816     | 35.2% | 20.6% | 33.2% | 29.7% |
| ARHGDI6       | 398       | 43.0% | 15.6% | 30.4% | 29.7% |
| RGS4          | 5999      | 26.6% | 26.7% | 35.7% | 29.7% |
| SYT4          | 6860      | 31.5% | 33.0% | 24.5% | 29.7% |
| GFO1          | 54438     | 37.6% | 23.0% | 28.4% | 29.7% |
| FLJ10074      | 55681     | 35.8% | 24.8% | 28.5% | 29.7% |
| SLC6A19       | 340024    | 28.3% | 28.9% | 31.8% | 29.7% |
| TCF1          | 6927      | 44.8% | 26.1% | 18.1% | 29.7% |
| FLJ38144      | 374879    | 20.9% | 38.1% | 30.0% | 29.7% |
| RG9MTD3       | 158234    | 29.4% | 25.2% | 34.4% | 29.7% |
| DUSP16        | 80824     | 38.0% | 28.4% | 22.6% | 29.7% |
| NEUROD6       | 63974     | 22.9% | 26.4% | 39.8% | 29.7% |
| SEC15L1       | 54536     | 34.9% | 16.9% | 37.2% | 29.7% |
| DEFB14        | 245928    | 25.9% | 30.1% | 33.1% | 29.7% |
| ORS1B4        | 79339     | 31.0% | 29.5% | 28.6% | 29.7% |
| FLJ38725      | 144811    | 22.3% | 32.2% | 34.6% | 29.7% |
| TNFSF13       | 8741      | 37.5% | 24.6% | 27.0% | 29.7% |

|               |        |       |       |       |       |
|---------------|--------|-------|-------|-------|-------|
| RBBP4         | 5928   | 38.6% | 19.4% | 31.2% | 29.7% |
| MGC33947      | 126123 | 34.1% | 20.6% | 34.4% | 29.7% |
| KRTAP9-4      | 85280  | 39.6% | 26.4% | 23.1% | 29.7% |
| IRX6          | 79190  | 41.7% | 19.2% | 28.2% | 29.7% |
| OR8G5         | 219865 | 38.3% | 31.0% | 19.8% | 29.7% |
| FLJ14075      | 79954  | 30.2% | 25.8% | 33.2% | 29.7% |
| GC20          | 10289  | 41.9% | 15.3% | 31.9% | 29.7% |
| DGCR8         | 54487  | 33.2% | 35.2% | 20.8% | 29.7% |
| GENX-3414     | 8987   | 30.7% | 34.8% | 23.7% | 29.7% |
| MAPKAPK5      | 8550   | 23.7% | 36.7% | 28.7% | 29.7% |
| SLCSA9        | 200010 | 38.8% | 25.0% | 25.3% | 29.7% |
| LIMD1         | 8994   | 30.7% | 22.9% | 35.6% | 29.7% |
| C3F           | 10162  | 30.7% | 25.4% | 33.1% | 29.7% |
| GRPEL2        | 134266 | 34.5% | 32.4% | 22.2% | 29.7% |
| ZYX           | 7791   | 23.1% | 26.5% | 39.5% | 29.7% |
| PER2          | 8864   | 30.3% | 29.4% | 29.5% | 29.7% |
| NUTF2         | 10204  | 31.0% | 22.6% | 35.5% | 29.7% |
| RNASET2       | 8635   | 33.8% | 21.9% | 33.5% | 29.7% |
| VPS8          | 23355  | 32.8% | 26.0% | 30.3% | 29.7% |
| MGC5528       | 79075  | 30.0% | 24.2% | 34.9% | 29.7% |
| LOC161931     | 161931 | 37.9% | 26.4% | 24.8% | 29.7% |
| TOP2A         | 7153   | 31.3% | 36.0% | 22.0% | 29.7% |
| C20ORF28      | 25876  | 38.6% | 27.2% | 23.4% | 29.7% |
| ZNF519        | 162655 | 34.9% | 25.9% | 28.4% | 29.7% |
| SNIP          | 80725  | 41.5% | 18.0% | 29.7% | 29.7% |
| CSPG3         | 1463   | 29.2% | 29.8% | 30.2% | 29.7% |
| GPR51         | 9568   | 34.9% | 22.1% | 32.2% | 29.7% |
| RSC1A1        | 6248   | 26.7% | 26.5% | 36.0% | 29.7% |
| LOC51059      | 51059  | 26.8% | 24.6% | 37.8% | 29.7% |
| POLM          | 27434  | 32.7% | 31.0% | 25.5% | 29.7% |
| C1orf178      | 440603 | 25.1% | 32.6% | 31.5% | 29.7% |
| PTS           | 5805   | 51.9% | 12.8% | 24.5% | 29.7% |
| CASP3         | 836    | 26.2% | 24.3% | 38.8% | 29.7% |
| LOC284390     | 284390 | 35.7% | 22.7% | 30.8% | 29.7% |
| FLJ30294      | 130827 | 28.4% | 16.7% | 44.2% | 29.7% |
| WNT5B         | 81029  | 22.2% | 28.8% | 38.2% | 29.7% |
| TSPAN18       | 90139  | 40.2% | 25.0% | 24.0% | 29.7% |
| C7ORF29       | 113763 | 31.2% | 25.7% | 32.3% | 29.7% |
| KIR2DL5B      | 553128 | 38.4% | 17.6% | 33.2% | 29.8% |
| TTC12         | 54970  | 32.9% | 27.8% | 28.6% | 29.8% |
| SPANXB2       | 64694  | 39.6% | 30.4% | 19.3% | 29.8% |
| OR8K1         | 390157 | 30.7% | 37.1% | 21.5% | 29.8% |
| FLJ10846      | 55751  | 33.2% | 16.9% | 39.2% | 29.8% |
| SC4MOL        | 6307   | 25.2% | 34.1% | 30.0% | 29.8% |
| APBA2BP       | 63941  | 28.9% | 36.2% | 24.1% | 29.8% |
| TRHDE         | 29953  | 35.6% | 22.3% | 31.4% | 29.8% |
| DBT           | 1629   | 38.0% | 17.4% | 33.9% | 29.8% |
| HCNGP         | 29115  | 40.8% | 16.3% | 32.2% | 29.8% |
| MGC15416      | 84331  | 30.2% | 27.5% | 31.7% | 29.8% |
| DGKZ          | 8525   | 31.2% | 33.0% | 25.2% | 29.8% |
| PCTK2         | 5128   | 33.1% | 31.2% | 25.1% | 29.8% |
| OR1N1         | 138883 | 37.3% | 26.0% | 26.0% | 29.8% |
| BANF1         | 8815   | 37.8% | 23.9% | 27.6% | 29.8% |
| ZNF31         | 7579   | 31.7% | 21.6% | 35.9% | 29.8% |
| FLJ20244      | 55621  | 36.4% | 27.1% | 25.8% | 29.8% |
| CRYGC         | 1420   | 31.8% | 30.0% | 27.5% | 29.8% |
| ITGA7         | 3679   | 23.7% | 28.9% | 36.7% | 29.8% |
| OR8U9         | 504190 | 43.3% | 22.9% | 23.1% | 29.8% |
| MGAM          | 8972   | 40.3% | 21.0% | 28.1% | 29.8% |
| MRPL39        | 54148  | 30.6% | 32.7% | 26.1% | 29.8% |
| OR52N5        | 390075 | 41.9% | 31.5% | 15.9% | 29.8% |
| PLAU          | 5328   | 31.7% | 18.0% | 39.6% | 29.8% |
| E4F1          | 1877   | 42.3% | 20.5% | 26.5% | 29.8% |
| SUHW3         | 55609  | 46.1% | 21.8% | 21.4% | 29.8% |
| C8ORF1        | 734    | 29.6% | 32.4% | 27.3% | 29.8% |
| EXTL3         | 2137   | 34.7% | 21.3% | 33.3% | 29.8% |
| ZFYVE19       | 84936  | 35.7% | 18.6% | 35.1% | 29.8% |
| ZNF161        | 7716   | 33.6% | 20.4% | 35.4% | 29.8% |
| GAS41         | 8089   | 34.6% | 24.6% | 30.2% | 29.8% |
| KCNK18        | 338567 | 30.9% | 29.2% | 29.3% | 29.8% |
| ZNF436        | 80818  | 37.8% | 29.5% | 22.1% | 29.8% |
| CD47          | 961    | 30.4% | 28.9% | 30.1% | 29.8% |
| STARD5        | 80765  | 36.8% | 30.1% | 22.4% | 29.8% |
| OPRM1         | 4988   | 28.6% | 24.5% | 36.3% | 29.8% |
| MGC16824      | 57020  | 33.6% | 27.1% | 28.7% | 29.8% |
| MVD           | 4597   | 34.6% | 31.6% | 23.1% | 29.8% |
| PCDHA11       | 56138  | 24.6% | 32.6% | 32.1% | 29.8% |
| ZNF524        | 147807 | 41.6% | 28.6% | 19.2% | 29.8% |
| MGC8685       | 347733 | 29.2% | 31.2% | 29.1% | 29.8% |
| LOC345456     | 345456 | 36.5% | 31.9% | 21.1% | 29.8% |
| SNAPC5        | 10302  | 35.0% | 28.9% | 25.4% | 29.8% |
| EDIL3         | 10085  | 26.7% | 41.6% | 21.1% | 29.8% |
| BRUNOL5       | 60680  | 38.8% | 24.1% | 26.4% | 29.8% |
| ZNF553        | 197407 | 35.8% | 21.2% | 32.3% | 29.8% |
| KIAA0528      | 9847   | 28.7% | 41.5% | 19.2% | 29.8% |
| ARHGAP10      | 79658  | 43.2% | 27.1% | 19.1% | 29.8% |
| OPA1          | 4976   | 32.7% | 27.9% | 28.8% | 29.8% |
| KIAA1984      | 84960  | 32.6% | 28.8% | 28.0% | 29.8% |
| ARPC1B        | 10095  | 31.3% | 32.1% | 25.9% | 29.8% |
| ETV7          | 51513  | 39.7% | 25.0% | 24.8% | 29.8% |
| ARPM1         | 84517  | 40.6% | 18.9% | 30.0% | 29.8% |
| RP11-196G18.6 | 440689 | 28.0% | 27.4% | 34.1% | 29.8% |
| PHKG2         | 5261   | 25.0% | 39.8% | 24.6% | 29.8% |
| ADPRHL2       | 54936  | 29.7% | 35.0% | 24.8% | 29.8% |
| DHX37         | 57647  | 36.0% | 22.2% | 31.2% | 29.8% |
| FAM20C        | 56975  | 32.6% | 34.3% | 22.5% | 29.8% |
| FLJ20259      | 54870  | 36.2% | 24.6% | 28.6% | 29.8% |
| FLJ13710      | 79875  | 27.2% | 30.9% | 31.3% | 29.8% |

|               |        |       |       |       |       |
|---------------|--------|-------|-------|-------|-------|
| CACNG5        | 27091  | 42.5% | 14.5% | 32.5% | 29.8% |
| UNC5A         | 90249  | 33.6% | 32.4% | 23.4% | 29.8% |
| C20ORF10      | 27296  | 39.8% | 20.3% | 29.4% | 29.8% |
| H6PD          | 9563   | 38.7% | 33.5% | 17.3% | 29.8% |
| SERPINE1      | 5054   | 41.2% | 27.0% | 21.3% | 29.8% |
| MGAT4A        | 11320  | 41.5% | 21.3% | 26.7% | 29.8% |
| DKFZP564J0123 | 25915  | 22.6% | 23.1% | 43.8% | 29.8% |
| FLJ90586      | 135932 | 26.6% | 27.8% | 35.1% | 29.8% |
| FLOT1         | 10211  | 35.3% | 29.4% | 24.8% | 29.8% |
| RPH3AL        | 9501   | 23.6% | 32.4% | 33.6% | 29.8% |
| PUS1          | 80324  | 39.2% | 15.8% | 34.5% | 29.8% |
| SHOX          | 6473   | 44.5% | 22.6% | 22.4% | 29.8% |
| EFNA5         | 1946   | 33.6% | 28.9% | 27.0% | 29.8% |
| FLJ13265      | 79935  | 25.1% | 30.5% | 33.9% | 29.8% |
| DEFB126       | 81623  | 34.4% | 22.5% | 32.6% | 29.8% |
| TRAF3IP3      | 80342  | 29.5% | 29.3% | 30.8% | 29.8% |
| PDHA1         | 5160   | 38.2% | 17.4% | 33.9% | 29.8% |
| GTF2H5        | 404672 | 34.0% | 21.5% | 34.0% | 29.8% |
| C10ORF26      | 54838  | 34.3% | 25.7% | 29.6% | 29.8% |
| FLJ30469      | 284348 | 26.4% | 23.6% | 39.6% | 29.8% |
| LASS2         | 29956  | 31.7% | 20.5% | 37.4% | 29.8% |
| TEX12         | 56158  | 36.4% | 31.0% | 22.1% | 29.8% |
| MEOX1         | 4222   | 35.3% | 21.4% | 32.9% | 29.8% |
| TSSC1         | 7260   | 40.5% | 28.9% | 20.2% | 29.8% |
| ALS2CR4       | 65062  | 34.8% | 33.6% | 21.1% | 29.9% |
| LOC150223     | 150223 | 29.5% | 20.2% | 39.9% | 29.9% |
| ZAN           | 7455   | 31.5% | 32.3% | 25.8% | 29.9% |
| LOC56901      | 56901  | 31.7% | 21.4% | 36.5% | 29.9% |
| PILRA         | 29992  | 31.2% | 23.6% | 34.8% | 29.9% |
| OR2T33        | 391195 | 27.6% | 35.2% | 26.8% | 29.9% |
| GNMT          | 27232  | 41.8% | 19.5% | 28.2% | 29.9% |
| PLXNA3        | 55558  | 33.9% | 25.8% | 29.9% | 29.9% |
| MRPL45        | 84311  | 31.4% | 25.3% | 32.9% | 29.9% |
| HTO21         | 57415  | 25.5% | 27.8% | 36.3% | 29.9% |
| NDUFS3        | 4722   | 29.6% | 31.4% | 28.6% | 29.9% |
| OR5M8         | 219484 | 33.5% | 35.2% | 20.8% | 29.9% |
| MINPP1        | 9562   | 38.8% | 26.9% | 23.8% | 29.9% |
| NTNG2         | 84628  | 40.9% | 19.0% | 29.6% | 29.9% |
| RWDD1         | 51389  | 30.4% | 19.4% | 39.8% | 29.9% |
| RNASEH1       | 246243 | 45.1% | 22.1% | 22.3% | 29.9% |
| CTSD          | 1509   | 33.2% | 25.8% | 30.6% | 29.9% |
| FXYD2         | 486    | 28.9% | 26.7% | 34.0% | 29.9% |
| ZNF300        | 91975  | 34.4% | 29.8% | 25.4% | 29.9% |
| GNB2L1        | 10399  | 43.4% | 27.6% | 18.6% | 29.9% |
| RNASEL        | 6041   | 35.4% | 28.2% | 26.0% | 29.9% |
| RPS6KA3       | 6197   | 36.3% | 33.5% | 19.8% | 29.9% |
| ALPI          | 248    | 26.4% | 38.1% | 25.1% | 29.9% |
| MGC11271      | 79173  | 24.3% | 36.5% | 28.9% | 29.9% |
| UFM1          | 51569  | 32.4% | 26.5% | 30.7% | 29.9% |
| FGD2          | 221472 | 40.4% | 31.5% | 17.7% | 29.9% |
| ZNF564        | 163050 | 44.7% | 18.9% | 26.0% | 29.9% |
| CLEC6A        | 93978  | 37.1% | 22.6% | 30.0% | 29.9% |
| SLC35D1       | 23169  | 37.3% | 33.2% | 19.1% | 29.9% |
| FLJ46266      | 399949 | 33.5% | 23.5% | 32.6% | 29.9% |
| ZADH2         | 284273 | 33.7% | 21.4% | 34.6% | 29.9% |
| ZNF600        | 162966 | 27.3% | 39.1% | 23.3% | 29.9% |
| OR4C3         | 256144 | 27.4% | 27.3% | 35.0% | 29.9% |
| LG12          | 55203  | 33.2% | 30.4% | 26.0% | 29.9% |
| CADPS         | 8618   | 36.7% | 23.8% | 29.1% | 29.9% |
| HESX1         | 8820   | 45.0% | 21.9% | 22.8% | 29.9% |
| CAST          | 26059  | 30.6% | 23.6% | 35.5% | 29.9% |
| CHPT1         | 56994  | 46.9% | 19.3% | 23.5% | 29.9% |
| MR1           | 3140   | 43.1% | 20.0% | 26.6% | 29.9% |
| NOTCH2        | 4853   | 39.6% | 26.3% | 23.8% | 29.9% |
| BLVRA         | 644    | 27.8% | 32.2% | 29.7% | 29.9% |
| FLJ44815      | 400591 | 39.8% | 22.1% | 27.8% | 29.9% |
| UTS2          | 10911  | 43.2% | 21.7% | 24.9% | 29.9% |
| GYS1          | 2997   | 35.6% | 28.2% | 25.9% | 29.9% |
| C9ORF89       | 84270  | 40.2% | 22.8% | 26.7% | 29.9% |
| C6ORF209      | 55788  | 22.0% | 17.9% | 49.8% | 29.9% |
| BTN3A1        | 11119  | 38.2% | 23.2% | 28.3% | 29.9% |
| SEC23A        | 10484  | 28.5% | 24.5% | 36.8% | 29.9% |
| STAM2         | 10254  | 34.3% | 36.7% | 18.7% | 29.9% |
| EIF2C1        | 26523  | 24.4% | 32.4% | 32.9% | 29.9% |
| RNASE7        | 84659  | 39.2% | 22.4% | 28.2% | 29.9% |
| RPL22         | 6146   | 32.4% | 20.9% | 36.4% | 29.9% |
| APOA5         | 116519 | 44.6% | 18.3% | 26.9% | 29.9% |
| C11ORF10      | 746    | 34.5% |       | 25.3% | 29.9% |
| WDR5B         | 54554  | 38.0% | 26.2% | 25.5% | 29.9% |
| SPRY1         | 10252  | 30.2% | 25.8% | 33.8% | 29.9% |
| WDRX1         | 11152  | 31.2% | 24.5% | 34.0% | 29.9% |
| ZNF615        | 284370 | 34.8% | 26.2% | 28.8% | 29.9% |
| TPST1         | 8460   | 41.1% | 27.3% | 21.4% | 29.9% |
| SH2D1A        | 4068   | 35.4% | 19.4% | 35.0% | 29.9% |
| AP3B1         | 8546   | 34.9% | 26.1% | 28.7% | 29.9% |
| NNAT          | 4826   | 35.7% | 21.1% | 32.9% | 29.9% |
| C10ORF129     | 142827 | 30.0% | 37.1% | 22.7% | 29.9% |
| GNL1          | 2794   | 43.1% | 18.6% | 28.0% | 29.9% |
| UNKL          | 64718  | 32.5% | 38.3% | 19.0% | 29.9% |
| ERBB2IP       | 55914  | 39.5% | 38.6% | 11.8% | 29.9% |
| POLD2         | 5425   | 24.4% | 26.1% | 39.2% | 29.9% |
| RPS6KA5       | 9252   | 20.0% | 39.3% | 30.4% | 29.9% |
| XYLT1         | 64131  | 28.7% | 28.1% | 32.9% | 29.9% |
| KCNT1         | 57582  | 44.5% | 12.5% | 32.8% | 29.9% |
| ABCC6         | 368    | 44.8% | 16.3% | 28.8% | 29.9% |
| RAB10         | 10890  | 32.3% | 29.9% | 27.6% | 29.9% |
| ENPP6         | 133121 | 50.5% | 14.4% | 24.9% | 29.9% |
| CDKAL1        | 54901  | 32.9% | 30.3% | 26.6% | 29.9% |

|               |        |       |       |       |       |
|---------------|--------|-------|-------|-------|-------|
| FLT3LG        | 2323   | 38.3% | 26.8% | 24.7% | 29.9% |
| SUSD1         | 64420  | 30.6% | 30.2% | 29.0% | 29.9% |
| LOC55871      | 55871  | 37.9% | 22.2% | 29.8% | 29.9% |
| LOC390598     | 390598 | 19.9% | 43.5% | 26.5% | 29.9% |
| HAT1          | 8520   | 32.0% | 28.2% | 29.6% | 29.9% |
| MAOA          | 4128   | 37.7% | 27.4% | 24.7% | 29.9% |
| C15ORF2       | 23742  | 27.6% | 30.5% | 31.7% | 29.9% |
| PPP2R5B       | 5526   | 36.8% | 33.6% | 19.4% | 29.9% |
| CARD10        | 29775  | 32.8% | 26.3% | 30.7% | 29.9% |
| TNK2          | 10188  | 18.4% | 40.9% | 30.6% | 29.9% |
| ZNF134        | 7693   | 28.8% | 34.0% | 27.1% | 29.9% |
| KIAA0963      | 22904  | 34.2% | 23.8% | 31.9% | 29.9% |
| LOC85865      | 85865  | 29.1% | 24.4% | 36.3% | 29.9% |
| IL21          | 59067  | 30.8% | 26.3% | 32.8% | 29.9% |
| FLJ10884      | 54596  | 23.4% | 28.1% | 38.4% | 29.9% |
| MAP4K5        | 11183  | 34.0% | 26.8% | 29.0% | 29.9% |
| MTMR3         | 8897   | 27.9% | 37.9% | 24.0% | 29.9% |
| DDX17         | 10521  | 25.3% | 29.1% | 35.5% | 29.9% |
| FLJ20195      | 54853  | 40.4% | 24.3% | 25.2% | 30.0% |
| FLJ13273      | 79807  | 22.4% | 26.5% | 41.0% | 30.0% |
| PIPOX         | 51268  | 45.2% | 18.5% | 26.2% | 30.0% |
| VARS2         | 7407   | 37.6% | 27.6% | 24.6% | 30.0% |
| FAAH          | 2166   | 33.2% | 32.4% | 24.2% | 30.0% |
| IMPACT        | 55364  | 30.0% | 28.1% | 31.8% | 30.0% |
| KRAS2         | 3845   | 48.0% | 13.6% | 28.3% | 30.0% |
| DCAL1         | 160365 | 37.6% | 25.3% | 27.0% | 30.0% |
| RPF1          | 80135  | 35.3% | 15.3% | 39.3% | 30.0% |
| NUDT5         | 11164  | 34.6% | 29.7% | 25.6% | 30.0% |
| RAD52         | 5893   | 43.0% | 16.3% | 30.6% | 30.0% |
| ABCB1         | 5243   | 23.1% | 31.7% | 35.1% | 30.0% |
| DCUN1D1       | 54165  | 37.1% | 17.9% | 34.8% | 30.0% |
| SYVN1         | 84447  | 35.2% | 26.7% | 28.0% | 30.0% |
| FBXO44        | 93611  | 31.8% | 23.1% | 35.0% | 30.0% |
| HRG           | 3273   | 51.1% | 14.2% | 24.5% | 30.0% |
| HUMMLC2B      | 29895  | 32.4% | 20.8% | 36.7% | 30.0% |
| CLECSF6       | 50856  | 36.4% | 9.1%  | 44.4% | 30.0% |
| DMRT2         | 10655  | 37.7% | 26.3% | 26.0% | 30.0% |
| IL19          | 29949  | 30.9% | 40.1% | 19.0% | 30.0% |
| OR5K4         | 403278 | 33.4% | 23.4% | 33.1% | 30.0% |
| E2F5          | 1875   | 28.4% | 28.2% | 33.3% | 30.0% |
| PPP1R10       | 5514   | 18.0% | 36.4% | 35.6% | 30.0% |
| TIMM17A       | 10440  | 35.6% | 33.3% | 21.0% | 30.0% |
| TSPAN8        | 7103   | 37.6% | 38.2% | 14.2% | 30.0% |
| TRIM28        | 10155  | 36.0% | 25.9% | 28.0% | 30.0% |
| ZNF221        | 7638   | 30.1% | 31.3% | 28.5% | 30.0% |
| SLIT1         | 6585   | 32.7% | 26.5% | 30.7% | 30.0% |
| DNMT3B        | 1789   | 44.9% | 19.6% | 25.5% | 30.0% |
| SLC39A10      | 57181  | 46.2% | 24.5% | 19.3% | 30.0% |
| MGC57211      | 150165 | 24.7% | 25.7% | 39.5% | 30.0% |
| MGC29898      | 133015 | 28.7% | 34.7% | 26.6% | 30.0% |
| DKFZP761P1121 | 128989 | 33.6% | 21.7% | 34.6% | 30.0% |
| RUSC1         | 23623  | 36.6% | 24.2% | 29.1% | 30.0% |
| LOC116238     | 116238 | 28.8% | 25.1% | 36.1% | 30.0% |
| PRO1580       | 55374  | 23.5% | 35.4% | 31.0% | 30.0% |
| SGCB          | 6443   | 33.8% | 26.0% | 30.2% | 30.0% |
| BCL9          | 607    | 38.1% | 24.6% | 27.2% | 30.0% |
| NOP5/NOP58    | 51602  | 40.0% | 22.4% | 27.6% | 30.0% |
| CTBP2         | 1488   | 38.8% | 23.6% | 27.6% | 30.0% |
| FLJ21347      | 64847  | 23.8% | 33.6% | 32.7% | 30.0% |
| MGC40368      | 255394 | 25.0% | 26.5% | 38.5% | 30.0% |
| PCOLN3        | 5119   | 31.5% | 27.4% | 31.1% | 30.0% |
| ZNF493        | 284443 | 24.2% | 23.4% | 42.4% | 30.0% |
| CRTAP         | 10491  | 23.0% | 39.1% | 27.9% | 30.0% |
| RP1-14N1.3    | 388698 | 35.4% | 34.8% | 19.8% | 30.0% |
| FLJ31547      | 221223 | 36.9% | 20.8% | 32.3% | 30.0% |
| NDUF83        | 4709   | 39.7% | 28.2% | 22.1% | 30.0% |
| ZNF90         | 7643   | 41.0% | 30.2% | 18.8% | 30.0% |
| C6ORF119      | 83640  | 29.7% | 25.9% | 34.5% | 30.0% |
| BTG4          | 54766  | 38.1% | 16.8% | 35.1% | 30.0% |
| FLJ11171      | 55783  | 33.0% | 35.4% | 21.6% | 30.0% |
| MDS009        | 56986  | 27.6% | 29.3% | 33.2% | 30.0% |
| NEUROG1       | 4762   | 42.9% | 23.3% | 23.9% | 30.0% |
| DNER          | 92737  | 35.1% | 17.8% | 37.2% | 30.0% |
| AOC2          | 314    | 44.7% | 21.4% | 24.0% | 30.0% |
| APOBEC3D      | 140564 | 32.0% | 25.0% | 33.1% | 30.0% |
| HECW2         | 57520  | 36.7% | 27.9% | 25.5% | 30.0% |
| OR5H15        | 403274 | 26.1% | 33.6% | 30.4% | 30.0% |
| MTHFD1L       | 25902  | 22.1% | 38.2% | 29.7% | 30.0% |
| ORZ7          | 401427 | 23.5% | 35.6% | 31.0% | 30.0% |
| MGC35154      | 165100 | 48.3% | 13.1% | 28.7% | 30.0% |
| ANPEP         | 290    | 40.5% | 24.8% | 24.7% | 30.0% |
| LOC285636     | 285636 | 39.1% | 31.1% | 19.8% | 30.0% |
| OSBP2         | 23762  | 41.2% | 26.6% | 22.3% | 30.0% |
| KRT18         | 3875   | 27.6% | 28.6% | 33.9% | 30.0% |
| CYP7B1        | 9420   | 48.9% | 10.3% | 30.9% | 30.0% |
| KIAA1238      | 57494  | 35.2% | 22.7% | 32.2% | 30.0% |
| ARHGAP21      | 57584  | 32.5% | 29.2% | 28.5% | 30.0% |
| MGC1203       | 79140  | 23.4% | 39.6% | 27.1% | 30.0% |
| PIK3C2A       | 5286   | 28.2% | 34.4% | 27.5% | 30.0% |
| NALP8         | 126205 | 23.6% | 34.6% | 31.9% | 30.0% |
| CABP7         | 164633 | 30.4% | 38.1% | 21.6% | 30.0% |
| NDRG4         | 65009  | 46.3% | 28.4% | 15.4% | 30.0% |
| RPL13A        | 23521  | 41.5% | 22.4% | 26.2% | 30.0% |
| IRF3          | 3661   | 24.8% | 26.9% | 38.5% | 30.0% |
| MRPL36        | 64979  | 31.7% | 23.4% | 35.1% | 30.0% |
| CHD4          | 1108   | 38.5% | 25.4% | 26.2% | 30.0% |
| CYP4F3        | 4051   | 34.3% | 28.2% | 27.6% | 30.0% |
| ZNF180        | 7733   | 39.5% | 25.4% | 25.2% | 30.0% |

|              |        |       |       |       |       |
|--------------|--------|-------|-------|-------|-------|
| OR10H4       | 126541 | 29.6% | 30.2% | 30.3% | 30.0% |
| LOC55971     | 55971  | 29.0% | 17.2% | 44.0% | 30.0% |
| EFNB3        | 1949   | 28.9% | 37.0% | 24.3% | 30.0% |
| C22ORF8      | 55007  | 22.7% | 24.9% | 42.6% | 30.0% |
| HTR3E        | 285242 | 29.6% | 22.8% | 37.8% | 30.0% |
| MRPL18       | 29074  | 45.0% | 25.9% | 19.2% | 30.0% |
| BNIP3        | 664    | 27.1% | 33.8% | 29.3% | 30.0% |
| CHC1L        | 1102   | 29.8% | 31.0% | 29.4% | 30.1% |
| C10ORF119    | 79892  | 42.1% | 28.7% | 19.3% | 30.1% |
| PCMT1        | 5110   | 44.0% | 21.9% | 24.3% | 30.1% |
| SCAMP1       | 9522   | 24.8% | 34.2% | 31.1% | 30.1% |
| IL1F5        | 26525  | 36.8% | 23.9% | 29.5% | 30.1% |
| ZNF46        | 7597   | 26.5% | 26.6% | 37.1% | 30.1% |
| C1QBP        | 708    | 28.2% | 26.2% | 35.8% | 30.1% |
| SPAG8        | 26206  | 52.1% | 14.4% | 23.6% | 30.1% |
| FLJ13909     | 80178  | 32.1% | 25.9% | 32.2% | 30.1% |
| SEN7         | 57337  | 33.5% | 25.7% | 31.0% | 30.1% |
| POTE15       | 339010 | 22.4% | 33.7% | 34.0% | 30.1% |
| ZNF216       | 7763   | 38.1% | 32.8% | 19.4% | 30.1% |
| ADAMTS13     | 11093  | 40.2% | 21.5% | 28.5% | 30.1% |
| ZFR          | 51663  | 29.6% | 28.8% | 31.8% | 30.1% |
| PIGH         | 5283   | 21.1% | 40.0% | 29.2% | 30.1% |
| C3ORF57      | 165679 | 39.9% | 32.4% | 18.0% | 30.1% |
| LRP10        | 26020  | 35.5% | 30.6% | 24.1% | 30.1% |
| FLJ38288     | 284309 | 30.5% | 23.9% | 35.8% | 30.1% |
| MGC20262     | 138311 | 22.9% | 28.7% | 38.6% | 30.1% |
| TMSB4X       | 7114   | 36.7% | 32.4% | 21.2% | 30.1% |
| CREB3L1      | 90993  | 37.9% | 23.1% | 29.3% | 30.1% |
| EZI          | 168544 | 28.6% | 22.4% | 39.2% | 30.1% |
| GIOT-1       | 92283  | 25.4% | 28.3% | 36.5% | 30.1% |
| KLK12        | 43849  | 28.5% | 38.7% | 23.0% | 30.1% |
| BAGES        | 85316  | 35.8% | 28.2% | 26.3% | 30.1% |
| FLJ3977      | 285605 | 27.9% | 24.2% | 38.2% | 30.1% |
| C19ORF22     | 91300  | 35.0% | 31.3% | 24.0% | 30.1% |
| OR2M2        | 391194 | 32.2% | 26.0% | 32.0% | 30.1% |
| ANKMY2       | 57037  | 39.8% | 25.3% | 25.2% | 30.1% |
| ADORA2B      | 136    | 34.2% | 30.4% | 25.7% | 30.1% |
| NDUFA2       | 4695   | 37.6% | 19.3% | 33.3% | 30.1% |
| ANP32C       | 23520  | 38.5% | 27.0% | 24.8% | 30.1% |
| IGFBP5       | 3488   | 36.4% | 25.0% | 28.9% | 30.1% |
| BA526D8.4    | 83744  | 28.5% | 23.2% | 38.6% | 30.1% |
| APCDD1       | 147495 | 19.2% | 48.6% | 22.5% | 30.1% |
| PEF1         | 553115 | 38.5% | 22.2% | 29.6% | 30.1% |
| FZD5         | 7855   | 13.3% | 39.1% | 37.8% | 30.1% |
| AGRP         | 181    | 40.6% | 33.2% | 16.5% | 30.1% |
| ODZ1         | 10178  | 27.5% | 33.7% | 29.1% | 30.1% |
| KIAA0907     | 22889  | 39.9% | 21.5% | 28.9% | 30.1% |
| ARRB1        | 408    | 35.5% | 25.0% | 29.9% | 30.1% |
| DECR2        | 26063  | 35.5% | 25.0% | 29.8% | 30.1% |
| SLC7A13      | 157724 | 43.3% | 20.3% | 26.8% | 30.1% |
| C21ORF51     | 54065  | 39.6% | 23.2% | 27.5% | 30.1% |
| LRRC4        | 64101  | 32.7% | 19.3% | 38.4% | 30.1% |
| C7ORF7       | 136991 | 26.5% | 17.4% | 46.5% | 30.1% |
| CD160        | 11126  | 35.3% | 34.3% | 20.9% | 30.1% |
| GALNAC4S-6ST | 51363  | 24.9% | 34.9% | 30.6% | 30.1% |
| CR1          | 1378   | 36.1% | 30.0% | 24.3% | 30.1% |
| ATF5         | 22809  | 36.2% | 26.3% | 27.8% | 30.1% |
| ZNF500       | 26048  | 31.7% | 28.0% | 30.8% | 30.1% |
| MOAP1        | 64112  | 38.0% | 31.8% | 20.6% | 30.1% |
| PNPLA1       | 285848 | 48.7% | 20.7% | 21.0% | 30.1% |
| CUL3         | 8452   | 43.2% | 19.8% | 27.3% | 30.1% |
| NEU2         | 4759   | 36.4% | 31.1% | 22.8% | 30.1% |
| FLJ33641     | 202309 | 19.7% | 37.2% | 33.5% | 30.1% |
| CYLN2        | 7461   | 32.6% | 29.4% | 28.4% | 30.1% |
| EIF4G3       | 8672   | 40.8% | 20.8% | 28.8% | 30.1% |
| IL22         | 50616  | 34.7% | 28.4% | 27.3% | 30.1% |
| GCNT3        | 9245   | 33.3% | 26.7% | 30.4% | 30.1% |
| GIMAP2       | 26157  | 32.8% | 35.1% | 22.5% | 30.1% |
| MAGEH1       | 28986  | 38.9% | 22.9% | 28.6% | 30.1% |
| MGC10731     | 79363  | 32.3% | 21.8% | 36.3% | 30.1% |
| ZCCHC2       | 54877  | 33.3% | 34.0% | 23.1% | 30.1% |
| LOC399818    | 399818 | 35.6% | 25.7% | 29.1% | 30.1% |
| PPP2R1A      | 5518   | 40.0% | 30.2% | 20.2% | 30.1% |
| NSE1         | 151354 | 26.7% | 26.3% | 37.5% | 30.1% |
| HCP5         | 10866  | 40.5% | 23.5% | 26.4% | 30.1% |
| CD99L2       | 83692  | 41.5% | 18.1% | 30.8% | 30.1% |
| LENG8        | 114823 | 35.0% | 24.2% | 31.2% | 30.2% |
| CTCF         | 10664  | 31.6% | 28.1% | 30.8% | 30.2% |
| FBXO33       | 254170 | 40.2% | 21.0% | 29.2% | 30.2% |
| EDNRA        | 1909   | 28.4% | 39.8% | 22.2% | 30.2% |
| ODF4         | 146852 | 37.6% | 18.8% | 34.0% | 30.2% |
| SULT1E1      | 6783   | 28.1% | 30.5% | 31.8% | 30.2% |
| HEM1         | 3071   | 32.2% | 29.5% | 28.8% | 30.2% |
| TRIM42       | 287015 | 27.0% | 30.4% | 33.1% | 30.2% |
| TCERG1       | 10915  | 33.9% | 22.8% | 33.8% | 30.2% |
| CDH6         | 1004   | 30.3% | 18.5% | 41.7% | 30.2% |
| ZNF289       | 84364  | 36.9% | 23.5% | 30.1% | 30.2% |
| GNG13        | 51764  | 31.3% | 34.3% | 24.9% | 30.2% |
| DRG1         | 4733   | 25.6% | 40.7% | 24.2% | 30.2% |
| FLJ10511     | 55156  | 24.1% | 32.5% | 33.9% | 30.2% |
| RBP4         | 5950   | 33.3% | 23.0% | 34.1% | 30.2% |
| TFAP4        | 7023   | 32.2% | 29.6% | 28.7% | 30.2% |
| C18ORF19     | 125228 | 38.4% | 25.1% | 27.0% | 30.2% |
| POLR3E       | 55718  | 50.0% | 11.1% | 29.4% | 30.2% |
| Cxor40B      | 541578 | 37.8% | 29.7% | 23.0% | 30.2% |
| MBD3         | 53615  | 35.9% | 28.5% | 26.1% | 30.2% |
| ZNF297B      | 23099  | 28.9% | 16.7% | 44.9% | 30.2% |
| QPCT         | 25797  | 27.8% | 33.7% | 29.0% | 30.2% |

|               |        |       |       |       |       |
|---------------|--------|-------|-------|-------|-------|
| TEKT3         | 64518  | 37.1% | 28.3% | 25.2% | 30.2% |
| FLJ36874      | 219988 | 33.4% | 21.7% | 35.4% | 30.2% |
| PREX1         | 57580  | 28.0% | 34.6% | 27.9% | 30.2% |
| VKORC1L1      | 154807 | 33.1% | 22.6% | 34.8% | 30.2% |
| PSG6          | 5675   | 42.1% | 24.3% | 24.2% | 30.2% |
| ABCC9         | 10060  | 34.0% | 29.4% | 27.2% | 30.2% |
| NUDT14        | 256281 | 32.7% | 35.0% | 22.9% | 30.2% |
| MLLT4         | 4301   | 25.5% | 39.5% | 25.6% | 30.2% |
| RKHD2         | 51320  | 25.5% | 32.4% | 32.6% | 30.2% |
| IRS2          | 8660   | 33.6% | 34.9% | 22.0% | 30.2% |
| FLJ39061      | 165057 | 52.9% | 15.8% | 21.9% | 30.2% |
| LPIN2         | 9663   | 28.0% | 28.8% | 33.9% | 30.2% |
| FLJ22313      | 64224  | 28.2% | 27.5% | 35.0% | 30.2% |
| OVGP1         | 5016   | 35.7% | 33.3% | 21.6% | 30.2% |
| ORF1-FL49     | 84418  | 30.9% | 19.7% | 40.0% | 30.2% |
| WFDC3         | 140686 | 28.8% | 29.7% | 32.1% | 30.2% |
| LOC145741     | 145741 | 34.4% | 23.9% | 32.3% | 30.2% |
| ATP1A3        | 478    | 36.0% | 25.9% | 28.7% | 30.2% |
| DEFB4         | 1673   | 35.2% | 28.3% | 27.1% | 30.2% |
| ARPC5L        | 81873  | 32.4% | 32.1% | 26.2% | 30.2% |
| MAPRE2        | 10982  | 25.1% | 34.6% | 30.9% | 30.2% |
| OR56B1        | 387748 | 33.8% | 28.5% | 28.4% | 30.2% |
| CTDSPL        | 10217  | 37.0% | 22.1% | 31.5% | 30.2% |
| CDH9          | 1007   | 35.7% | 22.6% | 32.4% | 30.2% |
| CD163         | 9332   | 46.6% | 19.0% | 25.1% | 30.2% |
| ACR           | 49     | 25.1% | 34.9% | 30.7% | 30.2% |
| NEIL3         | 55247  | 34.3% | 24.6% | 31.8% | 30.2% |
| TSHR          | 7253   | 28.9% | 31.4% | 30.4% | 30.2% |
| KRTAP5-6      | 440023 | 41.6% | 22.8% | 26.3% | 30.2% |
| PNMA1         | 9240   | 40.8% | 22.8% | 27.1% | 30.2% |
| KIAA1277      | 27147  | 19.3% | 38.5% | 32.9% | 30.2% |
| KLHL4         | 56062  | 48.1% | 22.0% | 20.6% | 30.2% |
| UNQ1912       | 345757 | 19.8% | 29.9% | 41.0% | 30.2% |
| TNFSF12       | 8742   | 34.8% | 32.2% | 23.7% | 30.2% |
| GFI1          | 2672   | 30.5% | 29.3% | 30.9% | 30.2% |
| HLA-G         | 3135   | 38.5% | 15.0% | 37.3% | 30.2% |
| PRG1          | 5552   | 27.0% | 20.5% | 43.2% | 30.2% |
| C2ORF15       | 150590 | 32.3% | 24.6% | 33.9% | 30.2% |
| DPEP2         | 64174  | 28.3% | 34.7% | 27.7% | 30.2% |
| GLS           | 2744   | 39.4% | 20.8% | 30.5% | 30.2% |
| CDKL1         | 8814   | 28.0% | 32.1% | 30.7% | 30.2% |
| DUX1          | 26584  | 33.5% | 29.9% | 27.4% | 30.2% |
| ACSM3         | 6296   | 43.8% | 23.6% | 23.4% | 30.3% |
| PEX12         | 5193   | 40.9% | 20.1% | 29.8% | 30.3% |
| OR2A62        | 338755 | 33.1% | 25.3% | 32.3% | 30.3% |
| BTN2A3        | 54718  | 33.6% | 25.5% | 31.7% | 30.3% |
| TRIM49        | 57093  | 34.3% | 32.4% | 24.0% | 30.3% |
| NEGR1         | 257194 | 28.8% | 31.1% | 30.9% | 30.3% |
| GRIM19        | 51079  | 32.9% | 27.1% | 30.8% | 30.3% |
| HKR1          | 284459 | 43.6% | 29.8% | 17.4% | 30.3% |
| SMOX          | 54498  | 45.3% | 21.6% | 23.9% | 30.3% |
| HIP1          | 3092   | 29.4% | 32.2% | 29.2% | 30.3% |
| PCDHGA11      | 56105  | 33.1% | 26.5% | 31.2% | 30.3% |
| RPS6KA2       | 6196   | 27.4% | 30.1% | 33.3% | 30.3% |
| HMOX2         | 3163   | 27.6% | 22.3% | 40.8% | 30.3% |
| FLJ20035      | 55601  | 43.0% | 22.5% | 25.3% | 30.3% |
| CSGLCA-T      | 54480  | 38.9% | 31.2% | 20.7% | 30.3% |
| KRTAP17-1     | 83902  | 41.2% | 24.4% | 25.2% | 30.3% |
| TIGD4         | 201798 | 35.3% | 26.6% | 28.9% | 30.3% |
| FLJ11088      | 55297  | 29.9% | 13.8% | 47.1% | 30.3% |
| MOCS1         | 4337   | 42.6% | 22.9% | 25.4% | 30.3% |
| SLC1A7        | 6512   | 40.7% | 25.9% | 24.3% | 30.3% |
| ZNF17         | 7565   | 41.2% | 21.3% | 28.3% | 30.3% |
| GJB2          | 2706   | 28.9% | 24.0% | 38.0% | 30.3% |
| SLC35A1       | 10559  | 30.2% | 33.5% | 27.2% | 30.3% |
| FOXK2         | 3607   | 30.0% | 31.9% | 29.0% | 30.3% |
| DKFZP586H2123 | 25891  | 39.9% | 24.1% | 26.9% | 30.3% |
| LOC401152     | 401152 | 34.0% | 20.2% | 36.7% | 30.3% |
| SH3D19        | 152503 | 23.9% | 29.0% | 38.0% | 30.3% |
| CDK5          | 1020   | 23.4% | 34.7% | 32.8% | 30.3% |
| ADD1          | 118    | 36.3% | 24.9% | 29.7% | 30.3% |
| S100A1        | 6271   | 34.3% | 28.9% | 27.7% | 30.3% |
| MPDZ          | 8777   | 47.1% | 20.2% | 23.6% | 30.3% |
| ZNF345        | 25850  | 31.8% | 27.1% | 32.0% | 30.3% |
| ZNF44         | 51710  | 31.4% | 26.5% | 32.9% | 30.3% |
| UGT2B17       | 7367   | 41.8% | 20.1% | 29.0% | 30.3% |
| ATP7B         | 540    | 39.1% | 25.5% | 26.3% | 30.3% |
| CYP4B1        | 1580   | 34.7% | 29.4% | 26.8% | 30.3% |
| RAD9A         | 5883   | 29.0% | 33.8% | 28.1% | 30.3% |
| MGC3794       | 261726 | 39.6% | 27.7% | 23.7% | 30.3% |
| TBC1D10B      | 26000  | 37.8% | 23.3% | 29.8% | 30.3% |
| LOC399814     | 399814 | 26.9% | 23.8% | 40.3% | 30.3% |
| UHRF2         | 115426 | 37.0% | 28.9% | 25.1% | 30.3% |
| MTMR6         | 9107   | 31.0% | 29.2% | 30.8% | 30.3% |
| LOC400258     | 400258 | 32.1% | 21.6% | 37.3% | 30.3% |
| SIP1          | 8487   | 35.5% | 23.9% | 31.6% | 30.3% |
| IL20          | 50604  | 30.2% | 29.1% | 31.6% | 30.3% |
| CETN1         | 1068   | 35.6% | 33.1% | 22.2% | 30.3% |
| ZNF248        | 57209  | 38.0% | 28.2% | 24.8% | 30.3% |
| TBC1D15       | 64786  | 37.7% | 27.5% | 25.8% | 30.3% |
| SR-A1         | 58506  | 45.7% | 31.7% | 13.7% | 30.3% |
| ABCC5         | 10057  | 28.1% | 34.8% | 28.1% | 30.3% |
| DHFR1L        | 200895 | 41.1% | 23.6% | 26.3% | 30.3% |
| ACMSD         | 130013 | 42.0% | 27.8% | 21.2% | 30.3% |
| ZNF579        | 163033 | 40.4% | 23.6% | 27.0% | 30.3% |
| COMMD10       | 51397  | 36.1% | 25.4% | 29.5% | 30.3% |
| SMARCE1       | 6605   | 43.0% | 31.6% | 16.5% | 30.3% |
| CSF2R8        | 1439   | 28.5% | 33.6% | 28.9% | 30.3% |

|               |           |       |       |       |       |
|---------------|-----------|-------|-------|-------|-------|
| CNN1          | 1264      | 39.4% | 22.2% | 29.4% | 30.3% |
| COPZ2         | 51226     | 31.9% | 30.3% | 28.8% | 30.3% |
| MMP11         | 4320      | 32.0% | 23.7% | 35.3% | 30.3% |
| FLJ12606      | 79862     | 30.7% | 30.8% | 29.6% | 30.3% |
| SET           | 6418      | 30.8% | 35.9% | 24.3% | 30.3% |
| 76P           | 27229     | 33.1% | 30.8% | 27.1% | 30.3% |
| HBS1L         | 10767     | 44.2% | 24.7% | 22.1% | 30.3% |
| TOM1L2        | 146691    | 31.8% | 25.7% | 33.6% | 30.3% |
| JMID2A        | 9682      | 36.7% | 16.5% | 37.8% | 30.3% |
| GNPNAT1       | 64841     | 25.5% | 36.7% | 28.9% | 30.3% |
| LOCS1149      | 51149     | 36.1% | 22.2% | 32.8% | 30.3% |
| OPRL1         | 4987      | 30.0% | 36.5% | 24.5% | 30.4% |
| DOCK5         | 80005     | 34.5% | 40.2% | 16.4% | 30.4% |
| C14ORF100     | 51528     | 30.7% | 22.3% | 38.0% | 30.4% |
| FAM21C        | 253725    | 28.6% | 40.8% | 21.6% | 30.4% |
| PCDHB8        | 56128     | 26.6% | 31.9% | 32.5% | 30.4% |
| ART5          | 116969    | 41.8% | 27.9% | 21.4% | 30.4% |
| C6ORF117      | 112609    | 26.9% | 28.4% | 35.7% | 30.4% |
| FLJ36070      | 284358    | 37.0% | 23.8% | 30.2% | 30.4% |
| F2RL2         | 2151      | 30.0% | 30.0% | 31.0% | 30.4% |
| LOC196913     | 196913    | 35.7% | 25.6% | 29.8% | 30.4% |
| DPP6          | 1804      | 38.1% | 28.9% | 24.1% | 30.4% |
| PRSS7         | 5651      | 34.0% | 28.8% | 28.3% | 30.4% |
| GNPDA2        | 132789    | 33.5% | 26.6% | 31.0% | 30.4% |
| RNF186        | 54546     | 24.9% | 28.7% | 37.5% | 30.4% |
| MUC20         | 200958    | 26.4% | 28.6% | 36.0% | 30.4% |
| PHF2          | 5253      | 39.4% | 28.4% | 23.2% | 30.4% |
| TMPO          | 7112      | 39.6% | 25.4% | 26.2% | 30.4% |
| PRAMEF6       | 440561    | 33.6% | 26.9% | 30.6% | 30.4% |
| BAA1C         | 79870     | 38.5% | 25.0% | 27.7% | 30.4% |
| MGEA6         | 4253      | 30.8% | 24.4% | 36.0% | 30.4% |
| CHCHD3        | 54927     | 37.2% | 36.5% | 17.4% | 30.4% |
| FLJ21125      | 79680     | 30.6% | 29.0% | 31.5% | 30.4% |
| ATP8B2        | 57198     | 29.1% | 32.3% | 29.8% | 30.4% |
| COMMD8        | 54951     | 40.2% | 23.2% | 27.8% | 30.4% |
| CBLN1         | 869       | 31.3% | 26.4% | 33.5% | 30.4% |
| DCP2          | 167227    | 32.4% | 32.3% | 26.5% | 30.4% |
| ICSBP1        | 3394      | 31.7% | 29.5% | 30.0% | 30.4% |
| EDNRB         | 1910      | 34.9% | 23.0% | 33.2% | 30.4% |
| GABARAPL1     | 23710     | 33.1% | 35.2% | 22.9% | 30.4% |
| DKFZP761L1417 | 222865    | 33.0% | 25.2% | 33.0% | 30.4% |
| SRGAP2        | 9901      | 25.4% | 37.8% | 27.9% | 30.4% |
| PVRL4         | 81607     | 29.0% | 27.1% | 35.1% | 30.4% |
| KIAA1720      | 80851     | 30.8% | 19.7% | 40.6% | 30.4% |
| SEMA5B        | 54437     | 36.1% | 27.6% | 27.5% | 30.4% |
| NUBP2         | 10101     | 36.6% | 21.3% | 33.3% | 30.4% |
| ORS11         | 10798     | 32.8% | 34.5% | 23.9% | 30.4% |
| H3Z6          | 50717     | 40.0% | 20.3% | 30.9% | 30.4% |
| ODF2          | 4957      | 52.2% | 9.2%  | 29.9% | 30.4% |
| SOS2          | 6655      | 39.4% | 28.4% | 23.4% | 30.4% |
| PERP          | 64065     | 31.6% | 26.2% | 33.4% | 30.4% |
| FLJ12644      | 65251     | 25.0% | 24.0% | 42.2% | 30.4% |
| EV11          | 2122      | 27.1% | 34.6% | 29.5% | 30.4% |
| KRT1          | 3848      | 35.1% | 32.7% | 23.4% | 30.4% |
| AZ2           | 64343     | 33.0% | 19.8% | 38.5% | 30.4% |
| CHST13        | 166012    | 33.3% | 11.8% | 46.2% | 30.4% |
| SFRP2         | 6423      | 30.1% | 34.9% | 26.3% | 30.4% |
| PTPRR         | 5801      | 39.6% | 29.9% | 21.8% | 30.4% |
| CPEB4         | 80315     | 46.8% | 21.3% | 23.2% | 30.4% |
| COL16A1       | 1307      | 24.1% | 27.4% | 39.8% | 30.4% |
| CYORF15A      | 246126    | 34.7% | 31.1% | 25.4% | 30.4% |
| GDAP1         | 54332     | 38.8% | 26.4% | 26.1% | 30.4% |
| MGC4268       | 83607     | 33.2% | 21.9% | 36.2% | 30.4% |
| PPOX          | 5498      | 51.1% | 26.8% | 13.3% | 30.4% |
| TA-LRRP       | 23507     | 39.3% | 17.1% | 34.9% | 30.4% |
| SGPL1         | 8879      | 41.6% | 24.2% | 25.5% | 30.4% |
| LOC391253     | 391253    | 22.7% | 28.2% | 40.4% | 30.4% |
| UBAP1         | 51271     | 38.7% | 21.1% | 31.6% | 30.4% |
| CD163L1       | 283316    | 39.2% | 26.5% | 25.6% | 30.4% |
| CMYA5         | 202333    | 29.5% | 39.3% | 22.6% | 30.4% |
| FGFR2         | 2263      | 35.3% | 30.7% | 25.3% | 30.4% |
| PIN1          | 5300      | 37.2% | 22.1% | 32.0% | 30.4% |
| E2IG2         | 51287     | 41.0% | 26.1% | 24.2% | 30.4% |
| FLJ12439      | 65260     | 33.8% | 25.9% | 31.6% | 30.4% |
| CDH22         | 64405     | 41.9% | 20.3% | 29.2% | 30.4% |
| OR2L3         | 391192    | 30.4% | 33.6% | 27.4% | 30.4% |
| PSARL         | 55486     | 27.5% | 24.4% | 39.4% | 30.4% |
| NDUF55        | 4725      | 38.6% | 28.4% | 24.4% | 30.4% |
| CLEC2         | 51266     | 27.0% | 25.8% | 38.5% | 30.4% |
| RARA          | 5914      | 43.1% | 26.2% | 21.9% | 30.4% |
| DEPDC5        | 9681      | 32.3% | 32.7% | 26.4% | 30.4% |
| KIR3DL2       | 3812      | 36.9% | 29.7% | 24.8% | 30.4% |
| FLJ22405      | 64419     | 34.2% | 30.4% | 26.8% | 30.5% |
| ZNF227        | 7770      | 41.1% | 25.2% | 25.1% | 30.5% |
| ADAT1         | 23536     | 48.4% | 12.2% | 30.8% | 30.5% |
| FLJ00193      | 375033    | 26.8% | 26.8% | 37.8% | 30.5% |
| CLSTN3        | 9746      | 28.9% | 31.6% | 30.8% | 30.5% |
| E(Y)2         | 56943     | 26.2% | 28.2% | 37.0% | 30.5% |
| EGFL6         | 25975     | 24.7% | 30.1% | 36.6% | 30.5% |
| TCL6          | 27004     | 39.0% | 27.1% | 25.3% | 30.5% |
| FLJ32130      | 146540    | 32.8% | 27.2% | 31.4% | 30.5% |
| SETD5         | 55209     | 28.6% | 35.3% | 27.6% | 30.5% |
| PINX1         | 54984     | 31.2% | 24.8% | 35.4% | 30.5% |
| EFA6R         | 23362     | 43.9% | 18.1% | 29.4% | 30.5% |
| DEPDC1B       | 55789     | 36.4% | 25.4% | 29.6% | 30.5% |
| CD300LD       | 100131439 | 33.6% | 17.9% | 39.8% | 30.5% |
| ARHGAP5       | 394       | 28.3% | 28.2% | 34.9% | 30.5% |
| TXNDC11       | 51061     | 38.5% | 23.2% | 29.7% | 30.5% |

|              |        |       |       |       |       |
|--------------|--------|-------|-------|-------|-------|
| ORCSL        | 5001   | 29.0% | 28.7% | 33.8% | 30.5% |
| KIAA0101     | 9768   | 37.3% | 27.6% | 26.5% | 30.5% |
| LRRC20       | 55222  | 41.7% | 27.7% | 22.0% | 30.5% |
| CLN8         | 2055   | 31.8% | 30.7% | 29.0% | 30.5% |
| PHOSPHO1     | 162466 | 30.7% | 32.9% | 27.8% | 30.5% |
| PTX3         | 5806   | 35.0% | 23.3% | 33.1% | 30.5% |
| CDCA4        | 55038  | 31.9% | 33.6% | 26.0% | 30.5% |
| VMP          | 140767 | 33.2% | 21.1% | 37.2% | 30.5% |
| GLI2         | 2736   | 38.5% | 27.6% | 25.4% | 30.5% |
| CCNF         | 899    | 27.0% | 27.7% | 36.8% | 30.5% |
| ZNF302       | 55900  | 43.4% | 28.1% | 19.9% | 30.5% |
| RSHL3        | 345895 | 37.9% | 21.2% | 32.4% | 30.5% |
| AKAP12       | 9590   | 26.9% | 29.7% | 34.8% | 30.5% |
| LOC256394    | 256394 | 32.2% | 22.9% | 36.4% | 30.5% |
| TRAM1        | 23471  | 22.2% | 34.2% | 35.1% | 30.5% |
| MGC40042     | 150365 | 16.8% | 42.7% | 32.0% | 30.5% |
| DENR         | 8562   | 31.2% | 27.7% | 32.6% | 30.5% |
| LCE6A        | 448835 | 40.9% | 29.9% | 20.7% | 30.5% |
| C20ORF112    | 140688 | 32.7% | 27.4% | 31.5% | 30.5% |
| KSR          | 8844   | 32.9% | 31.0% | 27.6% | 30.5% |
| STXBP2       | 6813   | 35.1% | 24.1% | 32.3% | 30.5% |
| TXNDC2       | 84203  | 41.0% | 25.6% | 24.9% | 30.5% |
| PXK          | 54899  | 30.7% | 39.8% | 21.1% | 30.5% |
| MLLT10       | 8028   | 35.3% | 28.2% | 28.0% | 30.5% |
| GJE1         | 349149 | 37.3% | 31.3% | 22.9% | 30.5% |
| GIPC1        | 10755  | 47.6% | 14.9% | 29.0% | 30.5% |
| C2ORF4       | 51072  | 25.1% | 31.2% | 35.2% | 30.5% |
| OR4X1        | 390113 | 31.8% | 30.0% | 29.7% | 30.5% |
| IQCJ         | 654502 | 34.6% | 24.2% | 32.8% | 30.5% |
| SLC24A6      | 80024  | 45.0% | 23.9% | 22.7% | 30.5% |
| ODZ3         | 55714  | 36.1% | 22.3% | 33.1% | 30.5% |
| DSCR1L2      | 11123  | 26.7% | 33.3% | 31.5% | 30.5% |
| MCEE         | 84693  | 36.2% | 26.9% | 28.4% | 30.5% |
| KCNJ8        | 3764   | 37.4% | 18.8% | 35.4% | 30.5% |
| FLJ20512     | 54958  | 31.3% | 23.4% | 36.9% | 30.5% |
| CCL4L2       | 388372 | 24.0% | 37.4% | 30.2% | 30.5% |
| OR5F1        | 338674 | 28.6% | 29.9% | 33.1% | 30.5% |
| DPP4         | 1803   | 31.6% | 35.8% | 24.2% | 30.5% |
| ELK3         | 2004   | 33.7% | 32.0% | 25.9% | 30.5% |
| MRPL2        | 51069  | 32.2% | 29.2% | 30.2% | 30.5% |
| FLJ40126     | 283461 | 23.5% | 24.1% | 44.0% | 30.5% |
| INOC1        | 54617  | 40.0% | 22.3% | 29.3% | 30.5% |
| DKFZP727G131 | 221786 | 21.5% | 41.2% | 29.0% | 30.5% |
| SLC12A4      | 6560   | 46.9% | 17.6% | 27.1% | 30.5% |
| CYP3A7       | 1551   | 24.1% | 32.2% | 35.4% | 30.5% |
| SERPINB3     | 6317   | 40.8% | 28.5% | 22.3% | 30.5% |
| BTNL2        | 56244  | 38.6% | 23.4% | 29.6% | 30.5% |
| PTD008       | 51398  | 35.8% | 21.7% | 34.1% | 30.5% |
| C9ORF40      | 55071  | 26.3% | 25.2% | 40.1% | 30.6% |
| VLDLR        | 7436   | 38.8% | 21.8% | 31.1% | 30.6% |
| DNABJ12      | 54788  | 30.1% | 43.2% | 18.4% | 30.6% |
| CIDE-3       | 63924  | 35.2% | 24.6% | 31.9% | 30.6% |
| LOC388650    | 388650 | 33.3% | 22.9% | 35.4% | 30.6% |
| TGFB1        | 7045   | 34.5% | 25.0% | 32.2% | 30.6% |
| FLJ20647     | 55013  | 31.6% | 25.6% | 34.5% | 30.6% |
| LOC146853    | 146853 | 32.9% | 25.7% | 33.1% | 30.6% |
| ARID5B       | 84159  | 45.0% | 15.2% | 31.4% | 30.6% |
| OR2H1        | 26716  | 33.9% | 26.9% | 30.9% | 30.6% |
| GPC3         | 2719   | 39.5% | 25.8% | 26.4% | 30.6% |
| ZFP276       | 92822  | 22.5% | 18.5% | 50.6% | 30.6% |
| ALS2CR13     | 150864 | 42.4% | 26.7% | 22.6% | 30.6% |
| GIT1         | 28964  | 31.6% | 29.6% | 30.5% | 30.6% |
| PCGF5        | 84333  | 43.4% | 28.5% | 19.7% | 30.6% |
| TIMM17B      | 10245  | 36.9% | 19.6% | 35.2% | 30.6% |
| HB-1         | 57824  | 20.3% | 28.4% | 43.0% | 30.6% |
| DLX3         | 1747   | 36.8% | 26.6% | 28.3% | 30.6% |
| SPCS2        | 9789   | 39.7% | 31.8% | 20.3% | 30.6% |
| GNA14        | 9630   | 45.5% | 20.1% | 26.2% | 30.6% |
| FLJ32421     | 148362 | 27.6% | 25.2% | 39.0% | 30.6% |
| SLC40A1      | 30061  | 30.9% | 30.6% | 30.2% | 30.6% |
| SEL1L        | 6400   | 31.9% | 25.8% | 34.0% | 30.6% |
| C9ORF75      | 286262 | 36.2% | 33.9% | 21.6% | 30.6% |
| CDK6         | 1021   | 32.0% | 32.1% | 27.7% | 30.6% |
| PHACTR3      | 116154 | 35.0% | 25.6% | 31.1% | 30.6% |
| MARCH5       | 54708  | 38.0% | 26.1% | 27.6% | 30.6% |
| CPB2         | 1361   | 31.1% | 31.3% | 29.4% | 30.6% |
| MYO10        | 4651   | 36.5% | 24.9% | 30.3% | 30.6% |
| RNF138       | 51444  | 28.3% | 31.7% | 31.8% | 30.6% |
| CETP         | 1071   | 22.7% | 34.7% | 34.3% | 30.6% |
| ACYP1        | 97     | 36.5% | 23.2% | 32.0% | 30.6% |
| PCYT2        | 5833   | 32.8% | 19.3% | 39.7% | 30.6% |
| SHANK3       | 85358  | 39.9% | 28.6% | 23.3% | 30.6% |
| KLHL5        | 51088  | 36.9% | 28.9% | 25.9% | 30.6% |
| MRPL1        | 65008  | 28.3% | 30.3% | 33.2% | 30.6% |
| ANKRA2       | 57763  | 37.3% | 20.9% | 33.6% | 30.6% |
| EPHA7        | 2045   | 30.3% | 36.2% | 25.3% | 30.6% |
| COL21A1      | 81578  | 37.1% | 24.5% | 30.2% | 30.6% |
| DGKI         | 9162   | 28.8% | 30.3% | 32.6% | 30.6% |
| ZNF528       | 84436  | 41.5% | 26.7% | 23.7% | 30.6% |
| SERPINA13    | 388007 | 39.1% | 20.6% | 32.1% | 30.6% |
| SIGLEC9      | 27180  | 29.5% | 28.2% | 34.1% | 30.6% |
| RHBDL4       | 162494 | 31.6% | 33.1% | 27.1% | 30.6% |
| OR2T27       | 403239 | 43.6% | 21.8% | 26.4% | 30.6% |
| MASTL        | 84930  | 29.8% | 35.0% | 27.0% | 30.6% |
| DEFB104      | 140596 | 44.5% | 16.9% | 30.4% | 30.6% |
| CHRM5        | 1133   | 22.6% | 33.3% | 35.9% | 30.6% |
| LOC152098    | 152098 | 29.3% | 28.8% | 33.7% | 30.6% |
| SNAP25       | 6616   | 43.5% | 20.0% | 28.4% | 30.6% |



|               |        |       |       |       |       |
|---------------|--------|-------|-------|-------|-------|
| TMEM16D       | 121601 | 23.5% | 35.4% | 32.9% | 30.6% |
| RNF183        | 138065 | 33.1% | 27.5% | 31.3% | 30.6% |
| TYK2          | 7297   | 30.8% | 32.8% | 28.3% | 30.6% |
| MLP           | 65108  | 33.6% | 26.1% | 32.2% | 30.6% |
| ECT2          | 1894   | 32.8% | 26.6% | 32.5% | 30.6% |
| ZNF451        | 26036  | 44.8% | 25.0% | 22.1% | 30.6% |
| RFFL          | 117584 | 39.1% | 23.7% | 29.1% | 30.6% |
| ESRRG         | 2104   | 45.7% | 25.0% | 21.3% | 30.6% |
| DHX57         | 90957  | 28.3% | 33.1% | 30.5% | 30.6% |
| POMT2         | 29954  | 38.2% | 22.2% | 31.5% | 30.6% |
| SLC17A7       | 57030  | 38.1% | 26.8% | 27.0% | 30.6% |
| RAB33B        | 83452  | 39.5% | 27.8% | 24.6% | 30.6% |
| EPHA3         | 2042   | 26.1% | 38.1% | 27.8% | 30.7% |
| IL1RAPL1      | 11141  | 36.8% | 24.0% | 31.2% | 30.7% |
| MDGA1         | 266727 | 28.4% | 26.6% | 37.0% | 30.7% |
| FRS2          | 10818  | 20.9% | 38.5% | 32.6% | 30.7% |
| CDH12         | 1010   | 31.2% | 27.1% | 33.7% | 30.7% |
| PCDHGA7       | 56108  | 38.4% | 29.5% | 24.2% | 30.7% |
| PRRG1         | 5638   | 33.0% | 35.0% | 24.0% | 30.7% |
| CDC48         | 55143  | 40.2% | 27.3% | 24.5% | 30.7% |
| C14ORF48      | 256369 | 40.3% | 26.9% | 24.8% | 30.7% |
| GABARAPL2     | 11345  | 30.2% | 26.8% | 35.0% | 30.7% |
| AHCY          | 191    | 30.3% | 38.0% | 23.6% | 30.7% |
| UBASH3A       | 53347  | 39.4% | 24.8% | 27.8% | 30.7% |
| DOCK1         | 1793   | 32.2% | 27.0% | 32.8% | 30.7% |
| MS4A1         | 931    | 38.8% | 21.1% | 32.1% | 30.7% |
| C10ORF22      | 84890  | 29.7% | 31.9% | 30.5% | 30.7% |
| KCNG2         | 26251  | 40.4% | 24.5% | 27.1% | 30.7% |
| FLJ20345      | 54903  | 29.2% | 24.2% | 38.7% | 30.7% |
| FAM40A        | 85369  | 42.3% | 29.3% | 20.4% | 30.7% |
| ZNF235        | 9310   | 41.6% | 24.6% | 25.9% | 30.7% |
| TLE2          | 7089   | 46.1% | 16.4% | 29.5% | 30.7% |
| HCLS1         | 3059   | 29.4% | 36.0% | 26.6% | 30.7% |
| FLJ44691      | 345193 | 29.6% | 31.0% | 31.4% | 30.7% |
| IGFBP1        | 347252 | 40.7% | 20.1% | 31.2% | 30.7% |
| UNQ9217       | 167555 | 47.5% | 23.2% | 21.4% | 30.7% |
| AKR1A1        | 10327  | 36.7% | 21.4% | 34.0% | 30.7% |
| LOC92017      | 92017  | 46.7% | 19.5% | 25.9% | 30.7% |
| RAB13         | 5872   | 34.1% | 29.7% | 28.3% | 30.7% |
| FLJ20625      | 55004  | 24.5% | 37.3% | 30.3% | 30.7% |
| DKFZP564O0823 | 25849  | 42.6% | 26.8% | 22.7% | 30.7% |
| P2RX7         | 5027   | 36.6% | 21.3% | 34.2% | 30.7% |
| SARG          | 79098  | 19.6% | 37.6% | 34.9% | 30.7% |
| IGSF4         | 23705  | 22.6% | 32.4% | 37.0% | 30.7% |
| IL17          | 3605   | 25.3% | 23.2% | 43.5% | 30.7% |
| PRCC          | 5546   | 44.0% | 25.5% | 22.6% | 30.7% |
| FXYD5         | 53827  | 36.6% | 18.8% | 36.7% | 30.7% |
| EMCN          | 51705  | 31.5% | 25.4% | 35.3% | 30.7% |
| MRPL44        | 65080  | 45.3% | 20.3% | 26.5% | 30.7% |
| PSMA5         | 5686   | 35.3% | 36.3% | 20.5% | 30.7% |
| ARHGAP9       | 64333  | 43.1% | 22.0% | 27.1% | 30.7% |
| RNASE3        | 6037   | 32.0% | 24.7% | 35.4% | 30.7% |
| USP13         | 8975   | 33.3% | 38.6% | 20.2% | 30.7% |
| KCNMA1        | 3778   | 31.5% | 28.9% | 31.7% | 30.7% |
| TSSC4         | 10078  | 28.4% | 28.8% | 35.0% | 30.7% |
| KIT           | 3815   | 37.9% | 29.4% | 24.8% | 30.7% |
| FLJ30668      | 157753 | 37.4% | 20.4% | 34.4% | 30.7% |
| LXN           | 56925  | 35.2% | 34.8% | 22.1% | 30.7% |
| ORS6A3        | 390083 | 32.1% | 30.9% | 29.2% | 30.7% |
| ACTRT1        | 139741 | 30.0% | 34.9% | 27.3% | 30.7% |
| SLC28A2       | 9153   | 44.8% | 20.1% | 27.3% | 30.7% |
| SCYL1         | 57410  | 25.0% | 31.8% | 35.3% | 30.7% |
| GPR120        | 338557 | 33.3% | 26.4% | 32.5% | 30.7% |
| HMGCLL1       | 54511  | 47.4% | 18.1% | 26.7% | 30.7% |
| KIAA0701      | 23074  | 25.8% | 25.5% | 40.9% | 30.7% |
| MGC14798      | 89978  | 24.1% | 22.2% | 45.9% | 30.7% |
| MGC50559      | 254013 | 39.3% | 17.5% | 35.4% | 30.7% |
| C10ORF137     | 26098  | 41.6% | 25.1% | 25.4% | 30.7% |
| METTL5        | 29081  | 50.5% | 14.7% | 27.0% | 30.7% |
| KIAA1414      | 54497  | 25.6% | 24.9% | 41.7% | 30.7% |
| LRRK1         | 79705  | 29.4% | 36.4% | 26.4% | 30.7% |
| RAB4B         | 53916  | 50.7% | 18.9% | 22.6% | 30.7% |
| ZNF257        | 113835 | 37.7% | 32.8% | 21.7% | 30.7% |
| HDAC10        | 83933  | 35.9% | 30.7% | 25.6% | 30.7% |
| WTAP          | 9589   | 27.4% | 30.5% | 34.3% | 30.7% |
| ADAMT5        | 11096  | 30.4% | 31.7% | 30.1% | 30.7% |
| TRAF3IP1      | 26146  | 28.6% | 34.6% | 29.1% | 30.7% |
| EVX1          | 2128   | 34.5% | 30.6% | 27.2% | 30.7% |
| CYP4F11       | 57834  | 51.8% | 13.1% | 27.3% | 30.7% |
| XRCC4         | 7518   | 29.0% | 35.9% | 27.4% | 30.7% |
| DNAJA4        | 55466  | 31.2% | 31.7% | 29.4% | 30.7% |
| USP24         | 23358  | 28.3% | 37.1% | 26.8% | 30.7% |
| ORC2L         | 4999   | 39.5% | 25.7% | 27.1% | 30.7% |
| OR8B2         | 26595  | 29.1% | 36.4% | 26.8% | 30.8% |
| TPARL         | 55858  | 37.5% | 33.3% | 21.4% | 30.8% |
| FLJ14640      | 84902  | 36.6% | 24.1% | 31.6% | 30.8% |
| SLC2A14       | 144195 | 43.9% | 28.0% | 20.4% | 30.8% |
| FBXO38        | 81545  | 29.1% | 29.8% | 33.3% | 30.8% |
| DEDD          | 9191   | 35.3% | 30.2% | 26.8% | 30.8% |
| GLYAT         | 10249  | 29.2% | 19.9% | 43.2% | 30.8% |
| TFF2          | 7032   | 36.3% | 35.2% | 20.8% | 30.8% |
| RAB6B         | 51560  | 29.4% | 35.9% | 27.0% | 30.8% |
| C10ORF42      | 90550  | 37.0% | 25.7% | 29.6% | 30.8% |
| LOC56270      | 56270  | 26.4% | 26.0% | 39.9% | 30.8% |
| SPRY2         | 10253  | 33.1% | 26.2% | 33.0% | 30.8% |
| PLA2G10       | 8399   | 37.2% | 27.0% | 28.1% | 30.8% |
| CIAO1         | 9391   | 39.2% | 26.9% | 26.1% | 30.8% |
| LOC643923     | 643923 | 41.8% | 28.9% | 21.7% | 30.8% |

|           |        |       |       |       |       |
|-----------|--------|-------|-------|-------|-------|
| MSH4      | 4438   | 34.9% | 28.9% | 28.5% | 30.8% |
| HT008     | 55852  | 31.1% | 21.7% | 39.5% | 30.8% |
| RGL2      | 5863   | 34.4% | 35.6% | 22.3% | 30.8% |
| SHCBP1    | 79801  | 39.1% | 26.7% | 26.6% | 30.8% |
| PARP2     | 10038  | 53.1% | 17.5% | 21.7% | 30.8% |
| PARD6A    | 50855  | 38.3% | 25.8% | 28.3% | 30.8% |
| TFCP2L3   | 79977  | 30.1% | 27.5% | 34.8% | 30.8% |
| HA-1      | 23526  | 30.3% | 22.0% | 40.1% | 30.8% |
| SLCSA11   | 115584 | 27.0% | 32.6% | 32.9% | 30.8% |
| PLS3      | 5358   | 32.2% | 25.5% | 34.7% | 30.8% |
| FGD1      | 2245   | 44.7% | 26.3% | 21.3% | 30.8% |
| MPP2      | 4355   | 36.3% | 24.5% | 31.7% | 30.8% |
| HSD17B2   | 3294   | 37.2% | 22.7% | 32.5% | 30.8% |
| SERPIN8   | 5271   | 32.6% | 41.4% | 18.4% | 30.8% |
| FOXD4L2   | 286380 | 43.7% | 23.5% | 25.3% | 30.8% |
| MRPL55    | 128308 | 37.3% | 20.3% | 34.9% | 30.8% |
| DUFD1     | 113115 | 23.8% | 32.0% | 36.6% | 30.8% |
| LOC129642 | 129642 | 16.5% | 40.5% | 35.5% | 30.8% |
| ZDHH14    | 79683  | 35.1% | 25.6% | 31.7% | 30.8% |
| FLJ25476  | 149076 | 32.8% | 26.3% | 33.4% | 30.8% |
| MB        | 4151   | 32.3% | 32.5% | 27.6% | 30.8% |
| LSM1      | 27257  | 36.8% | 30.1% | 25.6% | 30.8% |
| SNAPC1    | 6617   | 43.2% | 25.7% | 23.6% | 30.8% |
| FBXO24    | 26261  | 37.4% | 30.3% | 24.7% | 30.8% |
| FLJ22573  | 79713  | 32.7% | 22.4% | 37.4% | 30.8% |
| KIAA1799  | 84455  | 43.9% | 33.9% | 14.7% | 30.8% |
| HTR2A     | 3356   | 34.6% | 26.2% | 31.7% | 30.8% |
| USP38     | 84640  | 40.2% | 23.0% | 29.3% | 30.8% |
| HRB2      | 11103  | 19.0% | 31.6% | 41.9% | 30.8% |
| ZNF571    | 51276  | 43.9% | 16.5% | 32.1% | 30.8% |
| UBE2G1    | 7326   | 31.1% | 33.8% | 27.7% | 30.8% |
| GALK2     | 2585   | 31.2% | 38.8% | 22.6% | 30.8% |
| FLJ25811  | 440699 | 37.3% | 23.3% | 31.9% | 30.8% |
| GPC1      | 2817   | 40.9% | 31.2% | 20.4% | 30.8% |
| RAB40B    | 10966  | 30.9% | 28.1% | 33.6% | 30.8% |
| C9ORF114  | 51490  | 38.6% | 31.9% | 22.1% | 30.8% |
| OR6C68    | 403284 | 25.6% | 37.0% | 29.9% | 30.8% |
| BJ-TSA-9  | 84985  | 19.1% | 33.8% | 39.6% | 30.8% |
| SMILE     | 160418 | 27.1% | 25.7% | 39.7% | 30.8% |
| XRN2      | 22803  | 38.3% | 29.4% | 24.8% | 30.9% |
| CSNK2B    | 1460   | 28.3% | 33.8% | 30.5% | 30.9% |
| HOXD12    | 3238   | 38.0% | 22.7% | 31.9% | 30.9% |
| KIAA1189  | 57471  | 31.8% | 22.5% | 38.3% | 30.9% |
| LIPC      | 3990   | 36.6% | 26.9% | 29.0% | 30.9% |
| SERPIN2   | 5276   | 37.2% | 33.3% | 22.0% | 30.9% |
| C6ORF148  | 80759  | 30.8% | 25.8% | 35.9% | 30.9% |
| PPP2R5E   | 5529   | 39.5% | 27.2% | 25.8% | 30.9% |
| C7ORF33   | 202865 | 40.4% | 28.0% | 24.2% | 30.9% |
| CD8B1     | 926    | 26.2% | 34.1% | 32.3% | 30.9% |
| KIAA1543  | 57662  | 32.4% | 29.6% | 30.6% | 30.9% |
| NUPL2     | 11097  | 34.7% | 24.7% | 33.2% | 30.9% |
| ADM       | 133    | 31.5% | 28.0% | 33.1% | 30.9% |
| SLC22A8   | 9376   | 25.3% | 32.7% | 34.6% | 30.9% |
| ZDHH14    | 55625  | 32.0% | 25.6% | 35.1% | 30.9% |
| POP4      | 10775  | 35.4% | 30.0% | 27.2% | 30.9% |
| BTBD7     | 55727  | 36.2% | 25.9% | 30.5% | 30.9% |
| ZNF630    | 57232  | 37.8% | 20.6% | 34.2% | 30.9% |
| RASL11B   | 65997  | 40.1% | 26.0% | 26.5% | 30.9% |
| BAZ1A     | 11177  | 28.6% | 35.7% | 28.4% | 30.9% |
| CDC2L5    | 8621   | 27.0% | 28.4% | 37.3% | 30.9% |
| AKAP28    | 158798 | 32.0% | 32.2% | 28.5% | 30.9% |
| RP9       | 6100   | 33.5% | 22.2% | 36.9% | 30.9% |
| USP8      | 9101   | 39.9% | 35.1% | 17.6% | 30.9% |
| CXORF2    | 1527   | 27.8% | 44.1% | 20.8% | 30.9% |
| PCDHGA4   | 56111  | 28.9% | 33.2% | 30.6% | 30.9% |
| AK3L1     | 50808  | 29.5% | 36.5% | 26.7% | 30.9% |
| DUOX2     | 50506  | 30.5% | 36.9% | 25.3% | 30.9% |
| SAP30L    | 79685  | 47.7% | 19.5% | 25.5% | 30.9% |
| FLJ20489  | 55652  | 51.7% | 21.9% | 19.1% | 30.9% |
| HCN3      | 57657  | 34.1% | 31.0% | 27.6% | 30.9% |
| H1FX      | 8971   | 45.5% | 23.3% | 23.9% | 30.9% |
| RBMYL1    | 378951 | 45.3% | 22.8% | 24.6% | 30.9% |
| FLJ23311  | 79733  | 29.7% | 25.5% | 37.5% | 30.9% |
| ZNF222    | 7673   | 38.2% | 32.2% | 22.3% | 30.9% |
| NICN1     | 84276  | 33.5% | 33.1% | 26.2% | 30.9% |
| CALR      | 811    | 46.9% | 25.7% | 20.1% | 30.9% |
| C6ORF114  | 85411  | 32.0% | 34.4% | 26.3% | 30.9% |
| WRN       | 7486   | 37.4% | 30.3% | 25.0% | 30.9% |
| MACROD2   | 140733 | 33.4% | 21.7% | 37.6% | 30.9% |
| SCGB1D2   | 10647  | 31.5% | 32.4% | 28.9% | 30.9% |
| MICAL2    | 9645   | 36.0% | 25.7% | 31.0% | 30.9% |
| C6ORF70   | 55780  | 33.5% | 30.4% | 28.8% | 30.9% |
| TUBA8     | 51807  | 31.4% | 24.1% | 37.2% | 30.9% |
| SLC35B3   | 51000  | 28.7% | 27.4% | 36.6% | 30.9% |
| FLJ35695  | 400359 | 42.3% | 26.5% | 24.0% | 30.9% |
| BLOC152   | 282991 | 34.9% | 31.7% | 26.2% | 30.9% |
| NOSIP     | 51070  | 35.4% | 27.4% | 30.0% | 30.9% |
| IGHMBP2   | 3508   | 29.9% | 21.0% | 41.9% | 30.9% |
| CPLX2     | 10814  | 38.0% | 30.9% | 23.9% | 30.9% |
| THUMP2    | 80745  | 32.6% | 24.8% | 35.4% | 30.9% |
| GGTL3     | 2686   | 31.2% | 30.0% | 31.6% | 30.9% |
| MGC34647  | 146433 | 29.0% | 31.6% | 32.2% | 30.9% |
| ORS1A2    | 401667 | 33.6% | 28.9% | 30.3% | 30.9% |
| AKT3      | 10000  | 36.3% | 27.3% | 29.2% | 30.9% |
| HTATIP2   | 10553  | 39.8% | 29.4% | 23.6% | 30.9% |
| MGC2731   | 79035  | 25.5% | 34.8% | 32.5% | 30.9% |
| MIPEP     | 4285   | 32.7% | 25.0% | 35.2% | 30.9% |
| MAN1A1    | 4121   | 25.6% | 34.8% | 32.4% | 30.9% |

|           |        |       |       |       |       |
|-----------|--------|-------|-------|-------|-------|
| EPO       | 2056   | 42.9% | 24.3% | 25.7% | 30.9% |
| ANKH01    | 54882  | 29.3% | 33.8% | 29.7% | 30.9% |
| MRPL19    | 9801   | 45.7% | 26.9% | 20.2% | 30.9% |
| LOC642219 | 642219 | 41.1% | 20.2% | 31.5% | 30.9% |
| RAB31L1   | 5866   | 33.6% | 26.5% | 32.8% | 30.9% |
| RCC2      | 55920  | 36.8% | 27.0% | 29.0% | 30.9% |
| RPL37     | 6167   | 34.6% | 23.5% | 34.7% | 31.0% |
| MGST3     | 4259   | 40.3% | 24.7% | 27.9% | 31.0% |
| RFC1      | 5981   | 37.7% | 29.9% | 25.3% | 31.0% |
| OIP5      | 11339  | 24.8% | 33.7% | 34.4% | 31.0% |
| SFN       | 2810   | 42.2% | 33.2% | 17.5% | 31.0% |
| ICAM5     | 7087   | 33.5% | 24.0% | 35.3% | 31.0% |
| SLC16A9   | 220963 | 43.3% | 22.1% | 27.5% | 31.0% |
| LOC653509 | 653509 | 43.7% | 17.0% | 32.2% | 31.0% |
| KLHL10    | 317719 | 37.5% | 29.7% | 25.7% | 31.0% |
| RASIP1    | 54922  | 30.5% | 29.3% | 33.1% | 31.0% |
| DGKB      | 1607   | 27.0% | 36.9% | 29.0% | 31.0% |
| RNASE9    | 390443 | 44.4% | 21.4% | 27.1% | 31.0% |
| VPS4B     | 9525   | 38.2% | 29.2% | 25.5% | 31.0% |
| PCDH8     | 56140  | 38.8% | 32.2% | 21.9% | 31.0% |
| SDOS      | 84309  | 25.8% | 26.7% | 40.4% | 31.0% |
| RAGE      | 5891   | 28.4% | 33.3% | 31.1% | 31.0% |
| LOC729767 | 729767 | 29.0% | 36.8% | 27.0% | 31.0% |
| RP26      | 375298 | 32.4% | 20.3% | 40.2% | 31.0% |
| POLR3A    | 11128  | 24.7% | 33.1% | 35.1% | 31.0% |
| GJA4      | 2701   | 38.2% | 29.1% | 25.6% | 31.0% |
| UBAP2     | 55833  | 29.0% | 27.3% | 36.6% | 31.0% |
| ZDHH1     | 29800  | 41.1% | 23.7% | 28.1% | 31.0% |
| LENEP     | 55891  | 32.4% | 28.9% | 31.6% | 31.0% |
| ARHGFE18  | 23370  | 20.9% | 32.4% | 39.7% | 31.0% |
| C9ORF97   | 158427 | 27.7% | 34.1% | 31.1% | 31.0% |
| PRDM6     | 93166  | 47.1% | 19.6% | 26.3% | 31.0% |
| FLJ20729  | 54680  | 38.0% | 23.5% | 31.4% | 31.0% |
| AREG      | 374    | 27.6% | 30.1% | 35.2% | 31.0% |
| LOC729515 | 729515 | 29.5% | 25.8% | 37.5% | 31.0% |
| ATP11A    | 23250  | 49.1% | 17.9% | 25.9% | 31.0% |
| PARP11    | 57097  | 32.7% | 34.7% | 25.6% | 31.0% |
| FEZL      | 55079  | 31.4% | 31.1% | 30.5% | 31.0% |
| AP3S1     | 1176   | 35.6% | 33.2% | 24.2% | 31.0% |
| BPY2C     | 442868 | 35.0% | 31.5% | 26.5% | 31.0% |
| URG4      | 55665  | 43.9% | 23.6% | 25.5% | 31.0% |
| BNIP3L    | 665    | 27.7% | 32.3% | 33.0% | 31.0% |
| CNIH2     | 254263 | 45.2% | 25.4% | 22.4% | 31.0% |
| DHRS9     | 10170  | 34.2% | 31.6% | 27.2% | 31.0% |
| PCSK7     | 9159   | 37.1% | 28.2% | 27.8% | 31.0% |
| MMP13     | 4322   | 25.8% | 40.0% | 27.2% | 31.0% |
| CACNA1I   | 8911   | 41.3% | 24.0% | 27.8% | 31.0% |
| ARHGFE19  | 128272 | 41.5% | 16.4% | 35.1% | 31.0% |
| UPK3A     | 7380   | 26.2% | 36.0% | 30.8% | 31.0% |
| PTCH      | 5727   | 32.4% | 34.3% | 26.3% | 31.0% |
| FAM128A   | 653784 | 42.4% | 25.1% | 25.5% | 31.0% |
| COG2      | 22796  | 40.7% | 32.2% | 20.1% | 31.0% |
| SERAC1    | 84947  | 33.6% | 32.3% | 27.2% | 31.0% |
| KLRB1     | 3820   | 33.6% | 22.4% | 37.0% | 31.0% |
| LAMA2     | 3908   | 30.2% | 28.2% | 34.7% | 31.0% |
| NLGN4Y    | 22829  | 32.7% | 30.4% | 30.0% | 31.0% |
| KBTBD7    | 84078  | 38.7% | 25.9% | 28.5% | 31.0% |
| PAQR9     | 344838 | 47.4% | 23.4% | 22.3% | 31.0% |
| DDX20     | 11218  | 39.1% | 22.2% | 31.8% | 31.0% |
| KCND1     | 3750   | 33.1% | 26.5% | 33.5% | 31.0% |
| CDY1      | 9085   | 41.2% | 21.4% | 30.4% | 31.0% |
| RNF39     | 80352  | 44.0% | 24.2% | 24.9% | 31.0% |
| GPX6      | 257202 | 32.0% | 24.1% | 37.0% | 31.0% |
| LOC338645 | 338645 | 39.7% | 24.9% | 28.5% | 31.0% |
| MGC12197  | 51319  | 33.7% | 24.1% | 35.3% | 31.0% |
| TBCE      | 6905   | 46.6% | 17.4% | 29.1% | 31.0% |
| EIF5B     | 9669   | 40.4% | 24.7% | 28.0% | 31.0% |
| CRMP1     | 1400   | 38.2% | 25.5% | 29.5% | 31.0% |
| CSNK2A1   | 1457   | 26.9% | 38.0% | 28.3% | 31.0% |
| CDC42EP2  | 10435  | 38.5% | 25.6% | 29.1% | 31.1% |
| KRTAP4-2  | 85291  | 32.8% | 25.0% | 35.3% | 31.1% |
| LOC51136  | 51136  | 31.6% | 27.6% | 34.0% | 31.1% |
| CYORF15B  | 84663  | 38.9% | 29.3% | 24.9% | 31.1% |
| RNPC1     | 55544  | 27.5% | 26.8% | 38.9% | 31.1% |
| PNOC      | 5368   | 22.5% | 40.6% | 30.1% | 31.1% |
| DEFB105   | 245908 | 41.6% | 12.1% | 39.5% | 31.1% |
| FLJ40142  | 400073 | 39.9% | 30.6% | 22.7% | 31.1% |
| PARD3     | 56288  | 30.5% | 39.7% | 23.1% | 31.1% |
| LOC442117 | 442117 | 41.4% | 18.0% | 33.8% | 31.1% |
| TAS2R43   | 259289 | 29.8% | 30.8% | 32.6% | 31.1% |
| RPL10L    | 140801 | 30.6% | 34.7% | 27.9% | 31.1% |
| KIAA0152  | 9761   | 25.7% | 33.9% | 33.7% | 31.1% |
| DHX36     | 170506 | 37.8% | 34.7% | 20.8% | 31.1% |
| MGC34821  | 283238 | 30.2% | 24.0% | 39.0% | 31.1% |
| VDR       | 7421   | 43.7% | 29.8% | 19.8% | 31.1% |
| TCTEL1    | 6993   | 27.8% | 28.0% | 37.4% | 31.1% |
| PLEKHG2   | 64857  | 32.4% | 33.1% | 27.7% | 31.1% |
| ORS1B5    | 282763 | 37.0% | 34.1% | 22.2% | 31.1% |
| HS3ST6    | 64711  | 41.8% | 22.2% | 29.2% | 31.1% |
| ZNF494    | 201516 | 37.7% | 17.9% | 37.7% | 31.1% |
| GSTA5     | 221357 | 36.4% | 24.8% | 32.1% | 31.1% |
| ORS1A4    | 401666 | 29.6% | 19.8% | 44.0% | 31.1% |
| C9ORF125  | 84302  | 31.4% | 18.2% | 43.7% | 31.1% |
| HDAC1     | 3065   | 37.3% | 24.5% | 31.5% | 31.1% |
| FLJ20859  | 64745  | 22.8% | 30.4% | 40.1% | 31.1% |
| MMP14     | 4323   | 39.1% | 29.1% | 25.1% | 31.1% |
| MGC34732  | 220047 | 28.8% | 33.6% | 30.9% | 31.1% |
| LOC340120 | 340120 | 31.6% | 28.5% | 33.2% | 31.1% |

|           |        |       |       |       |       |
|-----------|--------|-------|-------|-------|-------|
| NF-E4     | 58160  | 44.0% | 23.6% | 25.6% | 31.1% |
| RHEB      | 6009   | 29.1% | 30.2% | 34.0% | 31.1% |
| ATP8B1    | 5205   | 39.4% | 28.1% | 25.8% | 31.1% |
| CGI-96    | 27341  | 32.9% | 24.2% | 36.2% | 31.1% |
| C19ORF2   | 8725   | 34.5% | 28.4% | 30.3% | 31.1% |
| COBL      | 23242  | 34.3% | 31.6% | 27.4% | 31.1% |
| FLJ30934  | 254122 | 38.1% | 30.9% | 24.3% | 31.1% |
| ZNF237    | 9205   | 28.6% | 27.5% | 37.3% | 31.1% |
| MKRN3     | 7681   | 33.9% | 27.7% | 31.8% | 31.1% |
| DUSP8     | 1850   | 29.8% | 36.6% | 26.9% | 31.1% |
| OR11H6    | 122748 | 47.3% | 30.1% | 16.0% | 31.1% |
| ZMPSTE24  | 10269  | 36.4% | 26.9% | 30.0% | 31.1% |
| XKRY2     | 353515 | 34.0% | 31.4% | 28.0% | 31.1% |
| FLJ25660  | 148109 | 32.2% | 13.6% | 47.5% | 31.1% |
| FCHSD2    | 9873   | 37.6% | 27.4% | 28.4% | 31.1% |
| FLJ25414  | 124783 | 27.8% | 26.9% | 38.6% | 31.1% |
| DULLARD   | 23399  | 36.4% | 26.7% | 30.3% | 31.1% |
| ARMC4     | 55130  | 31.3% | 39.3% | 22.8% | 31.1% |
| C10ORF79  | 80217  | 35.3% | 30.7% | 27.4% | 31.1% |
| MANBA     | 4126   | 28.1% | 30.3% | 35.0% | 31.1% |
| GRB10     | 2887   | 35.6% | 30.3% | 27.5% | 31.1% |
| STEAP2    | 261729 | 41.3% | 20.8% | 31.3% | 31.1% |
| COG3      | 83548  | 38.3% | 29.4% | 25.6% | 31.1% |
| CA1       | 759    | 32.0% | 35.1% | 26.3% | 31.1% |
| POU4F3    | 5459   | 31.8% | 18.5% | 43.0% | 31.1% |
| PHCA      | 55331  | 38.1% | 25.2% | 30.1% | 31.1% |
| IHPK1     | 9807   | 23.8% | 38.0% | 31.5% | 31.1% |
| SPATS2    | 65244  | 36.2% | 24.5% | 32.7% | 31.1% |
| B3GNT4    | 79369  | 50.6% | 12.3% | 30.5% | 31.1% |
| ZBED2     | 79413  | 37.4% | 19.4% | 36.5% | 31.1% |
| KIAA1582  | 57690  | 25.1% | 35.2% | 33.1% | 31.1% |
| UGDH      | 7358   | 30.9% | 25.5% | 37.0% | 31.1% |
| PGC       | 5225   | 35.1% | 27.9% | 30.4% | 31.1% |
| JAK3      | 3718   | 32.8% | 35.8% | 24.9% | 31.1% |
| PEG3      | 5178   | 39.9% | 30.4% | 23.1% | 31.1% |
| ETS2      | 2114   | 34.3% | 24.7% | 34.4% | 31.1% |
| EFNA1     | 1942   | 48.2% | 20.0% | 25.2% | 31.1% |
| FCGBP     | 8857   | 38.5% | 27.8% | 27.1% | 31.1% |
| FLJ40342  | 124989 | 30.4% | 29.1% | 34.0% | 31.1% |
| C10RF36   | 343035 | 31.4% | 35.3% | 26.7% | 31.1% |
| DLG2      | 1740   | 38.2% | 34.4% | 20.9% | 31.1% |
| ZNF337    | 26152  | 37.3% | 30.2% | 25.9% | 31.1% |
| OR4F17    | 81099  | 38.5% | 24.7% | 30.3% | 31.1% |
| C14ORF133 | 63894  | 39.4% | 28.5% | 25.5% | 31.1% |
| ZNF230    | 7773   | 47.0% | 26.4% | 20.0% | 31.2% |
| CNNM4     | 26504  | 33.0% | 31.7% | 28.8% | 31.2% |
| ENPP1     | 5167   | 34.5% | 27.6% | 31.4% | 31.2% |
| RAET1E    | 135250 | 34.8% | 40.9% | 17.8% | 31.2% |
| DYSFIP1   | 116729 | 21.6% | 26.2% | 45.7% | 31.2% |
| SDPR      | 8436   | 43.9% | 24.8% | 24.8% | 31.2% |
| CLMN      | 79789  | 36.3% | 27.6% | 29.6% | 31.2% |
| PEX1      | 5189   | 29.7% | 25.6% | 38.2% | 31.2% |
| ALOX5     | 240    | 47.0% | 26.4% | 20.1% | 31.2% |
| MGC33367  | 123970 | 32.1% | 17.9% | 43.5% | 31.2% |
| RAB5A     | 5868   | 26.9% | 28.6% | 38.1% | 31.2% |
| SAS10     | 57050  | 41.8% | 25.0% | 26.8% | 31.2% |
| LOC112703 | 112703 | 48.1% | 15.3% | 30.2% | 31.2% |
| CD79B     | 974    | 34.4% | 38.3% | 20.9% | 31.2% |
| FOXJ2     | 55810  | 31.8% | 32.5% | 29.2% | 31.2% |
| C5        | 727    | 36.8% | 29.2% | 27.5% | 31.2% |
| MGC5297   | 79072  | 34.5% | 22.6% | 36.5% | 31.2% |
| FLJ21963  | 79611  | 42.8% | 18.9% | 31.9% | 31.2% |
| CEP250    | 11190  | 32.5% | 33.0% | 28.0% | 31.2% |
| VPS26A    | 9559   | 34.2% | 30.9% | 28.5% | 31.2% |
| ANKRD12   | 23253  | 26.2% | 26.0% | 41.3% | 31.2% |
| MRPS18C   | 51023  | 24.4% | 29.3% | 39.9% | 31.2% |
| APG4A     | 115201 | 38.8% | 30.1% | 24.7% | 31.2% |
| ARRB2     | 409    | 36.0% | 33.9% | 23.7% | 31.2% |
| PITPN1    | 26207  | 46.9% | 19.8% | 26.9% | 31.2% |
| ZNF277    | 11179  | 29.3% | 23.6% | 40.6% | 31.2% |
| SELT      | 51714  | 38.7% | 36.3% | 18.6% | 31.2% |
| MGC15619  | 84329  | 37.6% | 24.3% | 31.7% | 31.2% |
| C9ORF71   | 169693 | 26.5% | 25.3% | 41.8% | 31.2% |
| AKAP1     | 8165   | 42.8% | 25.1% | 25.7% | 31.2% |
| PLAC1     | 10761  | 35.7% | 28.0% | 29.8% | 31.2% |
| IQCA      | 79781  | 24.2% | 41.2% | 28.2% | 31.2% |
| FLJ40311  | 124535 | 28.9% | 35.9% | 28.8% | 31.2% |
| SNRPB2    | 6629   | 31.1% | 27.7% | 34.9% | 31.2% |
| EPHX2     | 2053   | 40.5% | 17.6% | 35.6% | 31.2% |
| DNAJB1    | 3337   | 38.1% | 25.0% | 30.6% | 31.2% |
| ZNF14     | 7561   | 34.8% | 35.4% | 23.5% | 31.2% |
| DMP1      | 1758   | 45.5% | 22.3% | 25.9% | 31.2% |
| SARDH     | 1757   | 37.0% | 27.7% | 29.0% | 31.2% |
| KAB       | 9859   | 34.0% | 30.3% | 29.3% | 31.2% |
| EGF       | 1950   | 36.6% | 30.1% | 27.0% | 31.2% |
| KCNH5     | 27133  | 43.9% | 17.5% | 32.3% | 31.2% |
| KCTD7     | 154881 | 40.7% | 22.9% | 30.0% | 31.2% |
| SLC17A1   | 6568   | 34.1% | 30.2% | 29.4% | 31.2% |
| FABP3     | 2170   | 32.9% | 25.1% | 35.7% | 31.2% |
| CDY1B     | 253175 | 46.7% | 10.0% | 37.0% | 31.2% |
| PTPN7     | 5778   | 32.0% | 43.9% | 17.8% | 31.2% |
| CRP       | 1401   | 39.8% | 22.6% | 31.3% | 31.2% |
| AATK      | 9625   | 26.3% | 32.9% | 34.5% | 31.2% |
| TTC13     | 79573  | 39.2% | 24.1% | 30.4% | 31.2% |
| LST-3     | 338821 | 26.5% | 29.3% | 38.0% | 31.3% |
| ADAR      | 103    | 48.4% | 18.1% | 27.3% | 31.3% |
| CDK11     | 23097  | 18.8% | 34.1% | 40.9% | 31.3% |
| HTN1      | 3346   | 48.3% | 23.6% | 21.9% | 31.3% |

|           |        |       |       |       |       |
|-----------|--------|-------|-------|-------|-------|
| FABP4     | 2167   | 33.8% | 28.4% | 31.6% | 31.3% |
| PRKCB1    | 23613  | 39.9% | 27.2% | 26.6% | 31.3% |
| ARFRP1    | 10139  | 47.0% | 26.0% | 20.8% | 31.3% |
| DDIT4     | 54541  | 46.6% | 28.2% | 19.0% | 31.3% |
| ORC3L     | 23595  | 42.8% | 22.3% | 28.7% | 31.3% |
| C6ORF33   | 85315  | 24.2% | 25.9% | 43.8% | 31.3% |
| DHX40     | 79665  | 48.7% | 19.1% | 26.0% | 31.3% |
| TRPC3     | 7222   | 41.5% | 22.1% | 30.2% | 31.3% |
| SYCN      | 342898 | 39.0% | 30.4% | 24.4% | 31.3% |
| SYT7      | 9066   | 32.5% | 27.1% | 34.2% | 31.3% |
| KIAA1893  | 114787 | 31.5% | 32.6% | 29.7% | 31.3% |
| CLC       | 23529  | 32.8% | 34.3% | 26.7% | 31.3% |
| IFNA2     | 3440   | 32.1% | 27.5% | 34.2% | 31.3% |
| ZBP1      | 81030  | 34.7% | 24.3% | 34.9% | 31.3% |
| AKAP10    | 11216  | 48.0% | 20.1% | 25.8% | 31.3% |
| PF4V1     | 5197   | 39.4% | 22.8% | 31.6% | 31.3% |
| C20ORF179 | 140836 | 43.2% | 23.2% | 27.5% | 31.3% |
| ST7L      | 54879  | 31.1% | 27.3% | 35.5% | 31.3% |
| COX6B1    | 1340   | 39.7% | 25.7% | 28.5% | 31.3% |
| AMFR      | 267    | 35.8% | 23.6% | 34.4% | 31.3% |
| KIAA0092  | 9702   | 23.1% | 34.8% | 35.9% | 31.3% |
| EPST11    | 94240  | 41.6% | 26.0% | 26.2% | 31.3% |
| ZNF395    | 55893  | 23.0% | 32.8% | 38.0% | 31.3% |
| ANAPC11   | 51529  | 38.9% | 26.2% | 28.8% | 31.3% |
| CRIP1     | 9419   | 28.2% | 28.1% | 37.6% | 31.3% |
| OR1Q1     | 158131 | 38.9% | 22.9% | 32.0% | 31.3% |
| EPHA1     | 2041   | 32.8% | 33.7% | 27.4% | 31.3% |
| HYAL3     | 8372   | 36.8% | 29.8% | 27.3% | 31.3% |
| P2RY8     | 286530 | 34.3% | 25.9% | 33.6% | 31.3% |
| RNF111    | 54778  | 33.3% | 29.6% | 31.0% | 31.3% |
| DIXDC1    | 85458  | 49.3% | 17.5% | 27.1% | 31.3% |
| FLJ20045  | 54797  | 26.7% | 26.0% | 41.2% | 31.3% |
| PYCRL     | 65263  | 38.2% | 25.4% | 30.3% | 31.3% |
| C20ORF32  | 57091  | 37.4% | 27.5% | 29.0% | 31.3% |
| FLJ13614  | 84142  | 22.7% | 43.9% | 27.3% | 31.3% |
| LAMC1     | 3915   | 29.9% | 25.4% | 38.6% | 31.3% |
| RPL23A    | 6147   | 38.4% | 20.9% | 34.6% | 31.3% |
| FLJ10324  | 55698  | 36.1% | 34.7% | 23.1% | 31.3% |
| C21ORF13  | 150082 | 40.6% | 18.6% | 34.8% | 31.3% |
| ZBED3     | 84327  | 31.8% | 23.6% | 38.6% | 31.3% |
| BMSC-UBP  | 84993  | 31.7% | 27.1% | 35.1% | 31.3% |
| SLC9A10   | 285335 | 42.9% | 23.7% | 27.5% | 31.3% |
| TAX1BP3   | 30851  | 40.4% | 32.1% | 21.5% | 31.3% |
| NEK6      | 10783  | 38.3% | 30.1% | 25.6% | 31.3% |
| TMCO4     | 255104 | 40.7% | 23.7% | 29.6% | 31.3% |
| ATP1A2    | 477    | 40.1% | 25.0% | 28.9% | 31.3% |
| C6ORF163  | 206412 | 21.8% | 35.7% | 36.5% | 31.3% |
| EIF2B2    | 8892   | 46.3% | 24.4% | 23.2% | 31.3% |
| FSCN2     | 25794  | 33.8% | 30.6% | 29.6% | 31.3% |
| MATR3     | 9782   | 46.4% | 17.5% | 30.2% | 31.3% |
| LOC91137  | 91137  | 29.3% | 24.2% | 40.5% | 31.3% |
| FCER1G    | 2207   | 35.5% | 32.7% | 25.8% | 31.3% |
| VPS4A     | 27183  | 24.7% | 37.4% | 31.9% | 31.4% |
| MX1       | 4599   | 43.7% | 21.3% | 29.1% | 31.4% |
| KCNJ2     | 3759   | 32.6% | 30.0% | 31.4% | 31.4% |
| FLJ13646  | 79635  | 29.6% | 24.7% | 39.8% | 31.4% |
| PTPRK     | 5796   | 30.8% | 36.5% | 26.8% | 31.4% |
| LOC344405 | 344405 | 35.0% | 32.4% | 26.6% | 31.4% |
| SLC16A1   | 6566   | 21.4% | 21.4% | 51.2% | 31.4% |
| TATDN3    | 128387 | 42.9% | 38.1% | 13.1% | 31.4% |
| DCC       | 1630   | 35.3% | 23.5% | 35.2% | 31.4% |
| MGC11102  | 84285  | 42.9% | 27.5% | 23.7% | 31.4% |
| HAND2     | 9464   | 36.2% | 24.3% | 33.6% | 31.4% |
| GRIN2C    | 2905   | 32.5% | 19.6% | 42.0% | 31.4% |
| VAV2      | 7410   | 36.3% | 24.7% | 33.1% | 31.4% |
| SSSCA1    | 10534  | 40.4% | 28.0% | 25.7% | 31.4% |
| BMP2      | 650    | 30.5% | 25.0% | 38.6% | 31.4% |
| MRPS24    | 64951  | 35.4% | 28.9% | 29.8% | 31.4% |
| MGC14595  | 84294  | 27.0% | 25.7% | 41.4% | 31.4% |
| LPO       | 4025   | 33.3% | 36.9% | 23.9% | 31.4% |
| PHGDH     | 26227  | 35.1% | 31.4% | 27.6% | 31.4% |
| FLJ90834  | 283135 | 35.5% | 25.3% | 33.3% | 31.4% |
| DCUN1D5   | 84259  | 44.0% | 22.4% | 27.8% | 31.4% |
| FLJ23233  | 79744  | 35.2% | 23.2% | 35.6% | 31.4% |
| LCE1B     | 353132 | 41.4% | 21.3% | 31.4% | 31.4% |
| UAP1L1    | 91373  | 44.3% | 25.6% | 24.3% | 31.4% |
| TMEM31    | 203562 | 31.6% | 31.3% | 31.3% | 31.4% |
| DMAP1     | 55929  | 43.0% | 23.3% | 27.9% | 31.4% |
| MKI67     | 4288   | 30.6% | 29.1% | 34.5% | 31.4% |
| SLC39A5   | 283375 | 38.7% | 35.1% | 20.4% | 31.4% |
| KIAA1627  | 57721  | 39.0% | 25.5% | 29.6% | 31.4% |
| CD34      | 947    | 34.0% | 31.0% | 29.1% | 31.4% |
| TNFRSF1A  | 7132   | 39.3% | 23.5% | 31.3% | 31.4% |
| ITIH1     | 3697   | 35.7% | 41.7% | 16.8% | 31.4% |
| CHRNA6    | 8973   | 37.7% | 29.7% | 26.8% | 31.4% |
| MAP3K13   | 9175   | 28.6% | 37.2% | 28.3% | 31.4% |
| SHARP     | 23013  | 29.5% | 31.7% | 33.0% | 31.4% |
| ATP6V0A4  | 50617  | 43.6% | 28.8% | 21.8% | 31.4% |
| RPP40     | 10799  | 37.6% | 34.7% | 21.9% | 31.4% |
| KLC2L     | 147700 | 37.7% | 24.3% | 32.1% | 31.4% |
| ARMETL1   | 441549 | 34.2% | 26.1% | 33.8% | 31.4% |
| FLJ90661  | 146547 | 32.6% | 34.0% | 27.6% | 31.4% |
| FLJ39155  | 133584 | 15.3% | 41.5% | 37.4% | 31.4% |
| ARL9      | 132946 | 41.4% | 32.1% | 20.8% | 31.4% |
| USP9X     | 8239   | 36.3% | 36.6% | 21.3% | 31.4% |
| RPP30     | 10556  | 41.7% | 16.4% | 36.1% | 31.4% |
| CCNJ      | 54619  | 32.2% | 30.5% | 31.5% | 31.4% |
| TSPAN5    | 10098  | 38.7% | 31.0% | 24.6% | 31.4% |

|              |           |       |       |       |       |
|--------------|-----------|-------|-------|-------|-------|
| FLJ41993     | 400935    | 34.4% | 25.6% | 34.3% | 31.4% |
| FLJ23235     | 80008     | 27.2% | 23.5% | 43.6% | 31.4% |
| LOC170261    | 170261    | 35.5% | 14.7% | 44.1% | 31.4% |
| CABIN1       | 23523     | 38.1% | 21.9% | 34.3% | 31.4% |
| STK22D       | 83942     | 29.0% | 34.5% | 30.8% | 31.4% |
| SIP          | 27101     | 25.6% | 18.5% | 50.2% | 31.4% |
| ZNF549       | 256051    | 34.2% | 26.8% | 33.3% | 31.4% |
| PRAMEF7      | 441871    | 40.7% | 21.7% | 31.9% | 31.4% |
| RNF40        | 9810      | 32.5% | 34.5% | 27.4% | 31.4% |
| LOC196346    | 196346    | 43.5% | 30.2% | 20.6% | 31.4% |
| FLJ36031     | 168455    | 34.5% | 32.9% | 26.9% | 31.4% |
| SLC30A6      | 55676     | 30.7% | 27.7% | 36.0% | 31.4% |
| C2ORF25      | 27249     | 34.0% | 26.6% | 33.8% | 31.4% |
| CHST8        | 64377     | 30.1% | 32.8% | 31.5% | 31.4% |
| SLC39A3      | 29985     | 35.3% | 25.3% | 33.8% | 31.4% |
| CYGB         | 114757    | 38.7% | 35.6% | 20.0% | 31.5% |
| ARHGAP8      | 23779     | 35.5% | 21.3% | 37.5% | 31.5% |
| KCNC2        | 3747      | 39.8% | 21.1% | 33.6% | 31.5% |
| DOCK10       | 55619     | 35.4% | 25.2% | 33.8% | 31.5% |
| SPINLW1      | 57119     | 42.8% | 32.0% | 19.6% | 31.5% |
| TNK1         | 8711      | 33.4% | 36.8% | 24.1% | 31.5% |
| ADAM22       | 53616     | 34.3% | 34.7% | 25.4% | 31.5% |
| NDUFA7       | 4701      | 32.9% | 21.8% | 39.6% | 31.5% |
| UBR2         | 23304     | 38.7% | 26.5% | 29.2% | 31.5% |
| DKFZP761G058 | 152926    | 32.4% | 30.4% | 31.6% | 31.5% |
| RAB38        | 23682     | 32.0% | 31.5% | 30.9% | 31.5% |
| UGP2         | 7360      | 42.8% | 21.8% | 29.8% | 31.5% |
| LY6K         | 54742     | 43.5% | 18.3% | 32.7% | 31.5% |
| NTAN1        | 123803    | 36.3% | 31.9% | 26.2% | 31.5% |
| HFC1R1       | 54985     | 31.2% | 36.2% | 27.0% | 31.5% |
| RPA2         | 6118      | 54.4% | 28.6% | 11.5% | 31.5% |
| RGR          | 266747    | 28.7% | 31.8% | 34.0% | 31.5% |
| MGC33414     | 257101    | 28.7% | 26.2% | 39.5% | 31.5% |
| PPIF         | 10105     | 46.4% | 23.9% | 24.2% | 31.5% |
| KBTBD11      | 9920      | 29.0% | 37.1% | 28.3% | 31.5% |
| RAB21        | 23011     | 39.3% | 24.5% | 30.6% | 31.5% |
| BPIL3        | 128859    | 45.7% | 26.1% | 22.6% | 31.5% |
| LOC150368    | 150368    | 16.2% | 33.3% | 45.0% | 31.5% |
| NOMO3        | 408050    | 38.8% | 22.1% | 33.5% | 31.5% |
| SLK          | 9748      | 28.6% | 31.1% | 34.7% | 31.5% |
| ZFP90        | 146198    | 34.5% | 34.2% | 25.8% | 31.5% |
| STK36        | 27148     | 28.4% | 38.0% | 28.1% | 31.5% |
| DNAJB4       | 11080     | 39.3% | 21.1% | 34.0% | 31.5% |
| KIAA1505     | 57639     | 41.5% | 22.2% | 30.8% | 31.5% |
| SAMD3        | 154075    | 33.1% | 32.4% | 29.0% | 31.5% |
| KIAA1228     | 57488     | 29.0% | 27.3% | 38.2% | 31.5% |
| KIAA0251     | 23042     | 26.6% | 29.9% | 38.0% | 31.5% |
| ZNF563       | 147837    | 54.2% | 15.8% | 24.5% | 31.5% |
| AK3          | 205       | 32.0% | 32.3% | 30.2% | 31.5% |
| PIGC         | 5279      | 39.9% | 25.5% | 29.2% | 31.5% |
| NET-7        | 23555     | 19.8% | 38.3% | 36.5% | 31.5% |
| KIAA0329     | 9895      | 42.4% | 22.7% | 29.5% | 31.5% |
| AMACL12      | 83650     | 27.8% | 21.7% | 45.1% | 31.5% |
| LOC284021    | 284021    | 28.4% | 26.7% | 39.4% | 31.5% |
| CSN3         | 1448      | 38.9% | 29.9% | 25.7% | 31.5% |
| NOX5         | 79400     | 35.5% | 27.5% | 31.6% | 31.5% |
| CDC37L1      | 55664     | 32.3% | 26.8% | 35.5% | 31.5% |
| CRYGN        | 155051    | 34.1% | 36.5% | 24.0% | 31.5% |
| DGKE         | 8526      | 40.2% | 24.8% | 29.6% | 31.5% |
| CRBN         | 51185     | 41.2% | 23.9% | 29.5% | 31.5% |
| SFXN2        | 118980    | 32.3% | 32.7% | 29.6% | 31.5% |
| CYS1         | 192668    | 40.2% | 27.3% | 27.2% | 31.5% |
| MGC33309     | 137362    | 31.5% | 31.1% | 32.0% | 31.5% |
| FLVCR        | 28982     | 41.9% | 23.5% | 29.2% | 31.5% |
| KRTAP1-1     | 81851     | 29.2% | 39.7% | 25.7% | 31.5% |
| MARS2        | 92935     | 35.2% | 33.0% | 26.4% | 31.5% |
| CD274        | 29126     | 33.5% | 29.3% | 31.8% | 31.5% |
| CNTFR        | 1271      | 28.9% | 32.5% | 33.2% | 31.5% |
| UNC13B       | 10497     | 46.8% | 25.2% | 22.6% | 31.5% |
| RAMP2        | 10266     | 28.4% | 36.1% | 30.2% | 31.5% |
| TAAAR1       | 134864    | 35.5% | 29.9% | 29.3% | 31.5% |
| C14ORF20     | 283629    | 28.9% | 37.9% | 27.9% | 31.6% |
| LCE1E        | 353135    | 40.2% | 23.5% | 31.0% | 31.6% |
| TXK          | 7294      | 41.6% | 27.7% | 25.4% | 31.6% |
| PFN2         | 5217      | 32.2% | 32.7% | 29.8% | 31.6% |
| CD24         | 100133941 | 34.6% | 30.5% | 29.6% | 31.6% |
| KEAP1        | 9817      | 38.7% | 17.0% | 39.0% | 31.6% |
| KIAA1600     | 57700     | 35.4% | 28.9% | 30.5% | 31.6% |
| GCN5L2       | 2648      | 38.0% | 24.4% | 32.4% | 31.6% |
| CREB1        | 1385      | 38.8% | 24.2% | 31.7% | 31.6% |
| C6ORF37      | 55603     | 33.8% | 24.0% | 36.9% | 31.6% |
| OR2A42       | 402317    | 28.7% | 33.0% | 33.1% | 31.6% |
| FLJ12586     | 79673     | 24.8% | 37.0% | 32.9% | 31.6% |
| SEC11L3      | 90701     | 38.6% | 28.2% | 27.9% | 31.6% |
| RIMS2        | 9699      | 41.0% | 29.0% | 24.7% | 31.6% |
| DOLPP1       | 57171     | 36.5% | 31.9% | 26.3% | 31.6% |
| FLJ20105     | 54821     | 35.6% | 28.1% | 31.0% | 31.6% |
| SPAP1        | 79368     | 44.1% | 23.1% | 27.5% | 31.6% |
| PDXP         | 57026     | 39.5% | 31.8% | 23.5% | 31.6% |
| R3HDM        | 23518     | 27.3% | 30.2% | 37.2% | 31.6% |
| FLJ23467     | 79626     | 29.0% | 31.2% | 34.5% | 31.6% |
| BHLHB3       | 79365     | 34.6% | 32.9% | 27.4% | 31.6% |
| OR13C4       | 138804    | 34.2% | 27.6% | 33.1% | 31.6% |
| PLEKHA3      | 65977     | 44.0% | 19.7% | 31.1% | 31.6% |
| SFRS10       | 6434      | 41.0% | 31.3% | 22.6% | 31.6% |
| TUBG2        | 27175     | 31.3% | 29.7% | 33.8% | 31.6% |
| PPP1R15A     | 23645     | 31.0% | 23.1% | 40.8% | 31.6% |
| LTF          | 4057      | 30.3% | 31.3% | 33.3% | 31.6% |

|           |        |       |       |       |       |
|-----------|--------|-------|-------|-------|-------|
| KLK2      | 3817   | 43.8% | 25.0% | 26.1% | 31.6% |
| NDUF66    | 4712   | 31.0% | 32.6% | 31.3% | 31.6% |
| OR7A17    | 26333  | 36.8% | 35.0% | 23.0% | 31.6% |
| SMAD1     | 4086   | 39.7% | 26.4% | 28.7% | 31.6% |
| MSN       | 4478   | 42.9% | 29.7% | 22.3% | 31.6% |
| SAMD9     | 54809  | 32.9% | 29.4% | 32.6% | 31.6% |
| LOC442726 | 442726 | 36.1% | 22.1% | 36.7% | 31.6% |
| PSCA      | 8000   | 37.8% | 31.7% | 25.4% | 31.6% |
| ALG12     | 79087  | 39.2% | 31.3% | 24.4% | 31.6% |
| KIF17     | 57576  | 37.1% | 35.1% | 22.7% | 31.6% |
| LOC400720 | 400720 | 32.4% | 28.6% | 34.0% | 31.6% |
| CCL18     | 6362   | 37.5% | 27.9% | 29.5% | 31.6% |
| ZNF622    | 90441  | 33.9% | 29.8% | 31.3% | 31.6% |
| RTN4      | 57142  | 37.3% | 28.3% | 29.3% | 31.6% |
| FKBP2     | 2286   | 44.0% | 24.5% | 26.4% | 31.6% |
| ITGB2     | 3689   | 45.7% | 25.1% | 24.1% | 31.6% |
| CDH5      | 1003   | 33.9% | 29.1% | 31.9% | 31.6% |
| LOC400689 | 57677  | 31.8% | 29.7% | 33.5% | 31.6% |
| STK39     | 27347  | 32.3% | 29.2% | 33.4% | 31.6% |
| LOC139425 | 139425 | 49.1% | 16.1% | 29.8% | 31.6% |
| SPP2      | 6694   | 26.1% | 32.7% | 36.1% | 31.6% |
| GOLPH2    | 51280  | 34.0% | 28.5% | 32.5% | 31.7% |
| TIAL1     | 7073   | 53.6% | 22.8% | 18.6% | 31.7% |
| MRTF-B    | 57496  | 42.1% | 37.9% | 15.0% | 31.7% |
| HOXD8     | 3234   | 28.8% | 33.3% | 32.9% | 31.7% |
| C6ORF166  | 55122  | 34.8% | 31.5% | 28.7% | 31.7% |
| PVRL3     | 25945  | 29.4% | 36.2% | 29.4% | 31.7% |
| HAS1      | 3036   | 32.9% | 26.4% | 35.7% | 31.7% |
| THBS3     | 7059   | 34.8% | 17.9% | 42.3% | 31.7% |
| MGC4655   | 84752  | 50.8% | 15.6% | 28.6% | 31.7% |
| PIPPIN    | 27254  | 29.7% | 20.9% | 44.4% | 31.7% |
| DCST1     | 149095 | 40.4% | 21.1% | 33.4% | 31.7% |
| SLC4A11   | 83959  | 39.7% | 27.9% | 27.5% | 31.7% |
| CPA6      | 57094  | 42.7% | 21.8% | 30.5% | 31.7% |
| SLC6A14   | 11254  | 27.5% | 35.3% | 32.2% | 31.7% |
| FGF16     | 8823   | 45.0% | 20.9% | 29.2% | 31.7% |
| LOC286257 | 286257 | 25.5% | 20.7% | 48.9% | 31.7% |
| C14ORF28  | 122525 | 37.7% | 34.4% | 22.9% | 31.7% |
| KDR       | 3791   | 21.4% | 34.7% | 38.9% | 31.7% |
| JAM3      | 83700  | 45.8% | 17.6% | 31.6% | 31.7% |
| FLJ45557  | 642938 | 43.1% | 33.8% | 18.2% | 31.7% |
| ORST3     | 390154 | 49.1% | 21.5% | 24.5% | 31.7% |
| TTTC16    | 158248 | 21.8% | 33.9% | 39.4% | 31.7% |
| ANKIB1    | 54467  | 35.2% | 31.1% | 28.7% | 31.7% |
| TSNAX     | 7257   | 22.1% | 39.6% | 33.4% | 31.7% |
| MAP3K10   | 4294   | 29.0% | 27.4% | 38.7% | 31.7% |
| LNPEP     | 4012   | 32.9% | 31.4% | 30.8% | 31.7% |
| Raptor    | 57521  | 28.7% | 21.5% | 44.9% | 31.7% |
| IFIT2     | 3433   | 34.5% | 28.4% | 32.2% | 31.7% |
| MYBL1     | 4603   | 39.3% | 21.6% | 34.1% | 31.7% |
| WBSCR27   | 155368 | 28.2% | 23.6% | 43.3% | 31.7% |
| TNNT1     | 7138   | 29.7% | 39.6% | 25.8% | 31.7% |
| BTBD1     | 53339  | 38.4% | 22.9% | 33.8% | 31.7% |
| TAP1      | 6890   | 36.3% | 32.2% | 26.7% | 31.7% |
| LOC123688 | 123688 | 42.5% | 28.0% | 24.6% | 31.7% |
| RIMS3     | 9783   | 38.2% | 34.1% | 22.8% | 31.7% |
| ECM2      | 1842   | 35.5% | 30.4% | 29.3% | 31.7% |
| MYCBP     | 26292  | 35.7% | 40.2% | 19.3% | 31.7% |
| C20ORF58  | 128414 | 45.2% | 23.2% | 26.7% | 31.7% |
| SPTLC2    | 9517   | 37.8% | 29.5% | 27.9% | 31.7% |
| MGC16169  | 93627  | 31.1% | 32.1% | 31.9% | 31.7% |
| MGC4399   | 84275  | 32.3% | 21.9% | 41.0% | 31.7% |
| PRH2      | 5555   | 29.2% | 31.9% | 34.1% | 31.7% |
| CTNNA1    | 1495   | 33.2% | 31.5% | 30.5% | 31.7% |
| FLJ39501  | 126410 | 33.3% | 35.3% | 26.5% | 31.7% |
| LOC144347 | 144347 | 28.8% | 30.8% | 35.6% | 31.7% |
| RAB19B    | 401409 | 36.9% | 24.8% | 33.5% | 31.7% |
| CDCA2     | 157313 | 37.0% | 35.5% | 22.7% | 31.7% |
| LONP      | 83752  | 38.4% | 32.0% | 24.7% | 31.7% |
| PACSN2    | 11252  | 33.6% | 33.9% | 27.7% | 31.7% |
| HTO11     | 55855  | 21.1% | 31.5% | 42.6% | 31.7% |
| WARS      | 7453   | 39.1% | 16.1% | 40.0% | 31.7% |
| C1ORF6    | 56893  | 28.9% | 35.1% | 31.3% | 31.7% |
| COG1      | 9382   | 38.5% | 25.2% | 31.5% | 31.7% |
| ACIN1     | 22985  | 26.0% | 34.3% | 34.9% | 31.7% |
| FSIP2     | 285135 | 35.6% | 29.4% | 30.2% | 31.7% |
| FLJ20203  | 54856  | 40.0% | 32.4% | 22.9% | 31.7% |
| C9ORF58   | 83543  | 49.3% | 24.7% | 21.3% | 31.7% |
| NFKBIA    | 4792   | 51.4% | 14.4% | 29.5% | 31.8% |
| RPS3      | 6188   | 31.6% | 46.2% | 17.5% | 31.8% |
| ALDH2     | 217    | 39.8% | 20.4% | 35.0% | 31.8% |
| ELMO1     | 9844   | 43.0% | 22.0% | 30.2% | 31.8% |
| ANGPTL1   | 9068   | 40.5% | 27.6% | 27.2% | 31.8% |
| LOC92196  | 92196  | 34.7% | 34.9% | 25.7% | 31.8% |
| SLC15A2   | 6565   | 44.7% | 24.2% | 26.5% | 31.8% |
| TENR      | 132612 | 44.5% | 24.2% | 26.6% | 31.8% |
| HAPLN4    | 404037 | 34.5% | 27.2% | 33.7% | 31.8% |
| SRP46     | 10929  | 37.3% | 22.1% | 36.0% | 31.8% |
| LOC143903 | 143903 | 30.5% | 25.8% | 39.1% | 31.8% |
| GML       | 2765   | 30.4% | 32.7% | 32.2% | 31.8% |
| TRIM10    | 10107  | 28.7% | 40.2% | 26.5% | 31.8% |
| ROCK1     | 6093   | 34.8% | 27.3% | 33.2% | 31.8% |
| CPZ       | 8532   | 37.2% | 22.8% | 35.4% | 31.8% |
| SIGLEC8   | 27181  | 39.5% | 33.2% | 22.6% | 31.8% |
| C10ORF88  | 80007  | 32.7% | 28.4% | 34.3% | 31.8% |
| MESP1     | 55897  | 31.6% | 35.9% | 27.8% | 31.8% |
| ZFP1      | 162239 | 34.7% | 28.0% | 32.6% | 31.8% |
| KRTAP13-3 | 337960 | 36.7% | 35.2% | 23.5% | 31.8% |

|               |           |       |       |       |       |
|---------------|-----------|-------|-------|-------|-------|
| TFIP11        | 24144     | 41.6% | 23.5% | 30.4% | 31.8% |
| EBAG9         | 9166      | 40.1% | 26.3% | 28.9% | 31.8% |
| C2ORF21       | 285175    | 32.8% | 35.6% | 27.0% | 31.8% |
| PRR5          | 55615     | 42.1% | 24.0% | 29.3% | 31.8% |
| FLJ32940      | 126859    | 35.0% | 25.2% | 35.2% | 31.8% |
| RFC3          | 5983      | 26.7% | 32.1% | 36.6% | 31.8% |
| KIAA1026      | 23254     | 37.2% | 32.8% | 25.4% | 31.8% |
| PCDH16        | 8642      | 24.3% | 27.2% | 43.9% | 31.8% |
| CIRH1A        | 84916     | 30.8% | 23.8% | 40.9% | 31.8% |
| FLJ20477      | 55650     | 26.5% | 21.3% | 47.6% | 31.8% |
| SASH1         | 23328     | 39.3% | 27.2% | 29.0% | 31.8% |
| CHX10         | 338917    | 26.6% | 34.0% | 34.9% | 31.8% |
| ESAM          | 90952     | 33.0% | 28.1% | 34.4% | 31.8% |
| OR8D4         | 338662    | 25.0% | 30.4% | 40.1% | 31.8% |
| BXDC1         | 84154     | 34.3% | 19.5% | 41.6% | 31.8% |
| RBM10         | 8241      | 40.9% | 26.8% | 27.8% | 31.8% |
| MGC15396      | 91369     | 28.6% | 22.5% | 44.4% | 31.8% |
| SPC25         | 57405     | 35.1% | 38.0% | 22.4% | 31.8% |
| ARHGFE7       | 8874      | 42.5% | 20.4% | 32.6% | 31.8% |
| FLJ13984      | 79828     | 38.9% | 24.8% | 31.8% | 31.8% |
| WFDC9         | 259240    | 23.0% | 40.7% | 31.7% | 31.8% |
| WNT8B         | 7479      | 32.4% | 36.0% | 27.2% | 31.8% |
| C6ORF128      | 221468    | 42.3% | 26.8% | 26.4% | 31.8% |
| AEBP2         | 121536    | 39.1% | 30.1% | 26.3% | 31.8% |
| GLIPR1        | 11010     | 34.0% | 29.9% | 31.6% | 31.8% |
| ANKRD28       | 23243     | 43.9% | 20.1% | 31.5% | 31.8% |
| FLT1          | 2321      | 29.2% | 35.7% | 30.6% | 31.8% |
| RGNEF         | 64283     | 33.1% | 38.4% | 24.0% | 31.8% |
| RBM15         | 64783     | 36.9% | 31.6% | 26.9% | 31.8% |
| KRTAP25-1     | 100131902 | 43.6% | 26.0% | 25.9% | 31.8% |
| NBPF8         | 641559    | 41.1% | 26.1% | 28.3% | 31.8% |
| LOC340543     | 340543    | 29.8% | 28.2% | 37.5% | 31.8% |
| CFC1          | 55997     | 44.8% | 26.7% | 24.0% | 31.8% |
| VCL           | 7414      | 39.3% | 24.9% | 31.3% | 31.8% |
| C6ORF107      | 54887     | 40.0% | 25.7% | 29.9% | 31.9% |
| OR8G1P        | 26494     | 38.4% | 26.1% | 31.1% | 31.9% |
| C22ORF23      | 84645     | 37.4% | 29.4% | 28.7% | 31.9% |
| CCDC3         | 83643     | 37.6% | 29.8% | 28.2% | 31.9% |
| AKAP6         | 9472      | 40.6% | 25.4% | 29.6% | 31.9% |
| TMPPRS11B     | 132724    | 24.3% | 33.6% | 37.6% | 31.9% |
| CTNNA3        | 29119     | 31.9% | 19.7% | 43.9% | 31.9% |
| MBTPS1        | 8720      | 35.1% | 32.8% | 27.6% | 31.9% |
| KIAA1724      | 85465     | 44.3% | 22.8% | 28.5% | 31.9% |
| AVIL          | 10677     | 34.1% | 26.7% | 34.8% | 31.9% |
| GFER          | 2671      | 32.3% | 31.3% | 32.0% | 31.9% |
| KCNMB3        | 27094     | 33.2% | 22.3% | 40.0% | 31.9% |
| SNFT          | 55509     | 42.5% | 26.6% | 26.5% | 31.9% |
| OLFM1         | 10439     | 45.2% | 24.1% | 26.3% | 31.9% |
| DYT1          | 1861      | 34.7% | 33.9% | 27.1% | 31.9% |
| CST5          | 1473      | 39.1% | 25.6% | 30.9% | 31.9% |
| USP34         | 9736      | 33.2% | 27.6% | 34.8% | 31.9% |
| SLIT2         | 9353      | 38.7% | 29.8% | 27.2% | 31.9% |
| MYH8          | 4626      | 33.0% | 26.5% | 36.1% | 31.9% |
| RUNDC1        | 146923    | 39.4% | 20.7% | 35.5% | 31.9% |
| INS-IGF2      | 723961    | 26.2% | 42.9% | 26.6% | 31.9% |
| C1orf68       | 100129271 | 37.2% | 22.3% | 36.1% | 31.9% |
| DNAH10        | 196385    | 43.2% | 28.7% | 23.7% | 31.9% |
| OSTN          | 344901    | 47.8% | 22.3% | 25.6% | 31.9% |
| FLJ14959      | 284391    | 49.7% | 17.4% | 28.6% | 31.9% |
| MGC2747       | 79086     | 34.8% | 28.2% | 32.6% | 31.9% |
| OR7D4         | 125958    | 44.8% | 27.4% | 23.4% | 31.9% |
| SMR3B         | 10879     | 42.2% | 29.7% | 23.8% | 31.9% |
| SLC5A8        | 160728    | 45.8% | 20.7% | 29.2% | 31.9% |
| HCBP6         | 65991     | 22.2% | 22.3% | 51.2% | 31.9% |
| FLJ33674      | 285368    | 33.0% | 24.2% | 38.5% | 31.9% |
| FLJ39531      | 400360    | 34.3% | 27.0% | 34.4% | 31.9% |
| C4B           | 721       | 37.3% | 21.9% | 36.6% | 31.9% |
| MI-ER1        | 57708     | 33.3% | 35.9% | 26.5% | 31.9% |
| INHBB         | 3625      | 37.8% | 28.2% | 29.7% | 31.9% |
| OR4C16        | 219428    | 43.2% | 26.9% | 25.5% | 31.9% |
| IFIT1         | 3434      | 34.2% | 30.0% | 31.5% | 31.9% |
| HRBL          | 3268      | 39.0% | 32.1% | 24.7% | 31.9% |
| RIPK2         | 8767      | 42.4% | 18.6% | 34.7% | 31.9% |
| ZNF583        | 147949    | 35.6% | 35.3% | 24.8% | 31.9% |
| RP13-36C9.6   | 441521    | 50.0% | 30.7% | 15.0% | 31.9% |
| FLJ11184      | 55319     | 38.5% | 30.2% | 27.0% | 31.9% |
| ECH1          | 1891      | 43.5% | 20.7% | 31.6% | 31.9% |
| BAGE3         | 85318     | 28.8% | 26.9% | 40.1% | 31.9% |
| CALB1         | 793       | 48.3% | 17.8% | 29.6% | 31.9% |
| TRA2A         | 29896     | 43.1% | 24.3% | 28.3% | 31.9% |
| PDCD11        | 22984     | 34.4% | 28.8% | 32.5% | 31.9% |
| OR51L1        | 119682    | 43.7% | 24.6% | 27.5% | 31.9% |
| GTF3C5        | 9328      | 35.6% | 33.8% | 26.5% | 31.9% |
| CXCL12        | 6387      | 38.2% | 30.2% | 27.3% | 31.9% |
| MGC99813      | 130612    | 52.3% | 21.6% | 21.9% | 31.9% |
| ACBD6         | 84320     | 33.0% | 31.6% | 31.2% | 31.9% |
| DKFZP434F0318 | 81575     | 31.0% | 26.3% | 38.5% | 31.9% |
| ZDHH3         | 51304     | 41.3% | 23.6% | 30.9% | 31.9% |
| COX8C         | 341947    | 31.7% | 36.4% | 27.7% | 31.9% |
| LOC55908      | 55908     | 30.0% | 36.4% | 29.4% | 31.9% |
| HK3           | 3101      | 32.5% | 32.6% | 30.8% | 31.9% |
| SERF1A        | 8293      | 46.6% | 23.9% | 25.3% | 32.0% |
| COL24A1       | 255631    | 36.8% | 25.2% | 33.9% | 32.0% |
| SPESP1        | 246777    | 35.4% | 23.3% | 37.1% | 32.0% |
| FLJ36748      | 134265    | 28.5% | 31.0% | 36.4% | 32.0% |
| DMBX1         | 127343    | 33.3% | 33.3% | 29.2% | 32.0% |
| KCNN2         | 3781      | 31.2% | 33.9% | 30.8% | 32.0% |
| DAB2IP        | 153090    | 47.5% | 30.2% | 18.2% | 32.0% |



|               |        |       |       |       |       |
|---------------|--------|-------|-------|-------|-------|
| FLJ14431      | 84869  | 39.6% | 20.1% | 36.3% | 32.0% |
| SLC2A9        | 56606  | 63.6% | 8.3%  | 23.9% | 32.0% |
| MRCL3         | 10627  | 35.8% | 35.5% | 24.6% | 32.0% |
| IGSF10        | 285313 | 39.0% | 27.3% | 29.6% | 32.0% |
| CKS1B         | 1163   | 42.2% | 24.6% | 29.1% | 32.0% |
| COCH          | 1690   | 36.1% | 33.0% | 26.9% | 32.0% |
| VIL1          | 7429   | 34.5% | 20.8% | 40.7% | 32.0% |
| LARP5         | 23185  | 20.8% | 36.5% | 38.8% | 32.0% |
| ZRANB1        | 54764  | 33.0% | 25.2% | 37.8% | 32.0% |
| BTBD9         | 114781 | 36.1% | 18.2% | 41.8% | 32.0% |
| DKFZP434A0131 | 54441  | 47.4% | 22.4% | 26.2% | 32.0% |
| HLA-E         | 3133   | 37.4% | 30.3% | 28.3% | 32.0% |
| MVK           | 4598   | 32.1% | 36.8% | 27.1% | 32.0% |
| KRTAP5-9      | 3846   | 44.4% | 29.8% | 21.9% | 32.0% |
| DOM3Z         | 1797   | 31.3% | 26.3% | 38.5% | 32.0% |
| NFRKB         | 4798   | 28.3% | 36.7% | 31.0% | 32.0% |
| NGG7          | 4818   | 31.8% | 27.2% | 37.1% | 32.0% |
| SUMF2         | 25870  | 27.9% | 38.6% | 29.5% | 32.0% |
| TEAD3         | 7005   | 38.8% | 35.0% | 22.2% | 32.0% |
| B4GALT6       | 9331   | 34.1% | 32.7% | 29.2% | 32.0% |
| DTX3L         | 151636 | 40.6% | 22.5% | 32.9% | 32.0% |
| OR2B6         | 26212  | 41.3% | 21.9% | 32.9% | 32.0% |
| IQGAP2        | 10788  | 38.6% | 30.0% | 27.4% | 32.0% |
| CBR3          | 874    | 48.3% | 13.2% | 34.6% | 32.0% |
| SCO2          | 9997   | 35.8% | 23.2% | 37.1% | 32.0% |
| MAPK8IP3      | 23162  | 35.3% | 28.1% | 32.7% | 32.0% |
| PALM2         | 114299 | 42.0% | 21.4% | 32.6% | 32.0% |
| PHF16         | 9767   | 31.6% | 26.0% | 38.5% | 32.0% |
| MAGMAS        | 51025  | 51.2% | 18.8% | 26.0% | 32.0% |
| NSFL1C        | 55968  | 37.1% | 29.1% | 29.9% | 32.0% |
| IL31          | 386653 | 32.6% | 30.0% | 33.5% | 32.0% |
| DNAI2         | 64446  | 35.3% | 33.3% | 27.5% | 32.0% |
| STARS         | 137735 | 38.0% | 33.1% | 25.0% | 32.0% |
| NALP7         | 199713 | 47.9% | 23.0% | 25.3% | 32.0% |
| SRY           | 6736   | 44.2% | 25.6% | 26.3% | 32.0% |
| GLG1          | 2734   | 37.5% | 22.3% | 36.3% | 32.0% |
| PRKCH         | 5583   | 29.8% | 27.9% | 38.5% | 32.0% |
| SIPA1L2       | 57568  | 21.3% | 34.5% | 40.4% | 32.0% |
| MMP3          | 4314   | 34.7% | 32.4% | 29.1% | 32.0% |
| GSC           | 145258 | 37.7% | 29.5% | 29.0% | 32.0% |
| RIF1          | 55791  | 32.6% | 30.8% | 32.8% | 32.1% |
| FYB           | 2533   | 30.4% | 30.2% | 35.5% | 32.1% |
| PLVAP         | 83483  | 38.1% | 24.1% | 34.1% | 32.1% |
| LTA4H         | 4048   | 30.8% | 34.1% | 31.3% | 32.1% |
| COX5B         | 1329   | 34.9% | 29.8% | 31.5% | 32.1% |
| LOC113174     | 113174 | 31.4% | 26.5% | 38.3% | 32.1% |
| POLR3G        | 10622  | 54.1% | 18.2% | 23.9% | 32.1% |
| RABL3         | 285282 | 36.8% | 33.1% | 26.3% | 32.1% |
| SB145         | 388695 | 25.3% | 24.3% | 46.6% | 32.1% |
| SEMA6A        | 57556  | 31.6% | 30.1% | 34.4% | 32.1% |
| CSNK1G2       | 1455   | 33.0% | 39.0% | 24.2% | 32.1% |
| HYPC          | 25766  | 41.1% | 28.4% | 26.7% | 32.1% |
| AS3MT         | 57412  | 47.4% | 26.6% | 22.2% | 32.1% |
| FTH1          | 2495   | 39.7% | 30.9% | 25.7% | 32.1% |
| WFDC13        | 164237 | 42.6% | 29.5% | 24.2% | 32.1% |
| AMELX         | 265    | 37.7% | 25.5% | 33.1% | 32.1% |
| ELK1          | 2002   | 31.4% | 29.9% | 35.1% | 32.1% |
| MMRN1         | 22915  | 42.9% | 32.5% | 20.9% | 32.1% |
| COL5A2        | 1290   | 26.3% | 40.6% | 29.4% | 32.1% |
| CSF3R         | 1441   | 36.8% | 28.2% | 31.3% | 32.1% |
| CTSH          | 1512   | 37.0% | 42.0% | 17.3% | 32.1% |
| TXNRD1        | 7296   | 42.9% | 28.8% | 24.6% | 32.1% |
| GARNL1        | 253959 | 38.2% | 30.4% | 27.7% | 32.1% |
| RECQL         | 5965   | 26.8% | 25.9% | 43.7% | 32.1% |
| SLC45A3       | 85414  | 43.3% | 26.0% | 27.1% | 32.1% |
| GAB1          | 2549   | 34.0% | 29.1% | 33.2% | 32.1% |
| CST6          | 1474   | 29.5% | 36.2% | 30.6% | 32.1% |
| NCOA1         | 8648   | 36.4% | 24.7% | 35.2% | 32.1% |
| AHSA2         | 130872 | 32.4% | 39.2% | 24.7% | 32.1% |
| KIAA1959      | 84959  | 36.4% | 26.3% | 33.6% | 32.1% |
| BOLA2B        | 654483 | 41.3% | 25.7% | 29.4% | 32.1% |
| LOC200373     | 200373 | 32.0% | 21.1% | 43.3% | 32.1% |
| RBM22         | 55696  | 40.0% | 36.4% | 20.0% | 32.1% |
| S100A3        | 6274   | 40.0% | 30.2% | 26.2% | 32.1% |
| MGC39325      | 90362  | 27.1% | 37.0% | 32.2% | 32.1% |
| PIGQ          | 9091   | 36.1% | 25.8% | 34.5% | 32.1% |
| TXNDC10       | 54495  | 47.3% | 23.0% | 26.1% | 32.1% |
| ISG20L2       | 81875  | 32.3% | 27.6% | 36.4% | 32.1% |
| WDFY1         | 57590  | 36.1% | 28.9% | 31.5% | 32.1% |
| SNX5          | 27131  | 37.6% | 23.3% | 35.5% | 32.1% |
| CDK5RAP1      | 51654  | 39.8% | 18.3% | 38.4% | 32.1% |
| SERPIND1      | 3053   | 35.0% | 31.5% | 29.9% | 32.1% |
| ITGA2B        | 3674   | 27.2% | 38.1% | 31.1% | 32.2% |
| USP31         | 57478  | 36.8% | 28.6% | 31.1% | 32.2% |
| CECR5         | 27440  | 31.8% | 41.7% | 23.0% | 32.2% |
| GNG12         | 55970  | 29.6% | 26.6% | 40.2% | 32.2% |
| ZNF207        | 7756   | 46.2% | 34.1% | 16.2% | 32.2% |
| MGC15429      | 84836  | 31.3% | 29.6% | 35.6% | 32.2% |
| FGF19         | 9965   | 40.6% | 27.9% | 28.1% | 32.2% |
| ITIH3         | 3699   | 28.7% | 31.9% | 35.9% | 32.2% |
| PPY           | 5539   | 29.0% | 35.2% | 32.4% | 32.2% |
| ELL3          | 80237  | 42.5% | 21.4% | 32.7% | 32.2% |
| H-PLK         | 51351  | 39.3% | 31.0% | 26.3% | 32.2% |
| OR7G1         | 125962 | 39.0% | 25.0% | 32.5% | 32.2% |
| RAD54B        | 25788  | 46.9% | 19.0% | 30.6% | 32.2% |
| TUSC4         | 10641  | 40.7% | 25.5% | 30.3% | 32.2% |
| FRMD4         | 55691  | 23.2% | 39.8% | 33.5% | 32.2% |
| VPS24         | 51652  | 39.6% | 24.4% | 32.5% | 32.2% |

|              |        |       |       |       |       |
|--------------|--------|-------|-------|-------|-------|
| CSMD3        | 114788 | 47.7% | 35.2% | 13.6% | 32.2% |
| LHFPL3       | 375612 | 29.4% | 31.7% | 35.4% | 32.2% |
| COMMD4       | 54939  | 35.8% | 32.9% | 27.9% | 32.2% |
| RWDD3        | 25950  | 40.8% | 25.6% | 30.1% | 32.2% |
| TRIM22       | 10346  | 34.1% | 29.6% | 32.8% | 32.2% |
| DKFZP5471048 | 127254 | 35.0% | 31.0% | 30.5% | 32.2% |
| RGS18        | 64407  | 31.6% | 33.3% | 31.6% | 32.2% |
| KIAA0703     | 9914   | 36.2% | 28.6% | 31.8% | 32.2% |
| IQGAP3       | 128239 | 51.1% | 19.9% | 25.6% | 32.2% |
| RODH-4       | 8608   | 27.3% | 40.7% | 28.6% | 32.2% |
| GLIS2        | 84662  | 26.8% | 33.3% | 36.5% | 32.2% |
| NEK8         | 284086 | 36.8% | 29.0% | 30.9% | 32.2% |
| DYRK1A       | 1859   | 34.4% | 30.1% | 32.1% | 32.2% |
| FAM57A       | 79850  | 27.3% | 37.9% | 31.3% | 32.2% |
| FLJ13840     | 79802  | 34.1% | 28.5% | 34.0% | 32.2% |
| EGFL9        | 65989  | 34.5% | 26.2% | 35.9% | 32.2% |
| SRF          | 6722   | 39.2% | 32.2% | 25.2% | 32.2% |
| ORSB3        | 441608 | 35.9% | 34.0% | 26.8% | 32.2% |
| TIAM2        | 26230  | 37.5% | 29.9% | 29.2% | 32.2% |
| CST9         | 128822 | 45.6% | 24.7% | 26.3% | 32.2% |
| MARCKS       | 4082   | 33.5% | 28.9% | 34.2% | 32.2% |
| OR4D9        | 390199 | 29.7% | 37.1% | 29.9% | 32.2% |
| GPSM3        | 63940  | 40.8% | 30.5% | 25.4% | 32.2% |
| DDEF1        | 50807  | 50.3% | 22.4% | 24.0% | 32.2% |
| OSR1         | 9943   | 30.6% | 33.8% | 32.3% | 32.2% |
| C20orf118    | 140711 | 30.2% | 35.2% | 31.3% | 32.2% |
| FCMD         | 2218   | 36.0% | 28.4% | 32.2% | 32.2% |
| C10ORF12     | 26148  | 36.1% | 36.6% | 24.0% | 32.2% |
| MBNL3        | 55796  | 30.0% | 33.3% | 33.3% | 32.2% |
| FLJ44952     | 163933 | 34.8% | 18.3% | 43.6% | 32.2% |
| ZNF100       | 163227 | 44.1% | 30.4% | 22.1% | 32.2% |
| FSIP1        | 161835 | 25.9% | 36.7% | 34.0% | 32.2% |
| C15ORF17     | 57184  | 42.0% | 29.5% | 25.2% | 32.2% |
| APBA2        | 321    | 44.0% | 29.9% | 22.7% | 32.2% |
| DMD          | 1756   | 40.1% | 28.8% | 27.7% | 32.2% |
| LYG6D        | 58530  | 27.6% | 37.1% | 32.0% | 32.2% |
| C6ORF96      | 55005  | 27.8% | 32.3% | 36.6% | 32.2% |
| MGC39715     | 169166 | 34.7% | 30.1% | 31.9% | 32.2% |
| REG1A        | 5967   | 45.2% | 30.0% | 21.5% | 32.2% |
| PSG5         | 5673   | 39.4% | 33.7% | 23.7% | 32.2% |
| FGFRL1       | 53834  | 39.4% | 24.6% | 32.7% | 32.2% |
| STOML2       | 30968  | 37.4% | 24.6% | 34.7% | 32.2% |
| MEP50        | 79084  | 30.3% | 40.6% | 25.8% | 32.3% |
| ZNF565       | 147929 | 33.5% | 26.6% | 36.7% | 32.3% |
| ZFH2         | 85446  | 48.0% | 21.2% | 27.6% | 32.3% |
| ZCCHC9       | 84240  | 10.0% | 57.1% | 29.6% | 32.3% |
| DPPA4        | 55211  | 36.7% | 30.9% | 29.2% | 32.3% |
| WDR23        | 80344  | 31.6% | 32.4% | 32.8% | 32.3% |
| BTNL3        | 10917  | 44.7% | 28.4% | 23.6% | 32.3% |
| MK2S4        | 92241  | 30.2% | 34.8% | 31.8% | 32.3% |
| SERPINB4     | 6318   | 31.8% | 28.4% | 36.6% | 32.3% |
| ZNF169       | 169841 | 32.8% | 36.5% | 27.5% | 32.3% |
| KLRK1        | 22914  | 40.5% | 31.1% | 25.2% | 32.3% |
| CIB3         | 117286 | 45.2% | 16.7% | 34.9% | 32.3% |
| C6ORF158     | 167681 | 32.8% | 35.8% | 28.2% | 32.3% |
| ZBED1        | 9189   | 39.7% | 37.5% | 19.6% | 32.3% |
| E1F3S10      | 8661   | 45.8% | 14.2% | 36.9% | 32.3% |
| ST3GAL2      | 6483   | 44.1% | 23.5% | 29.3% | 32.3% |
| OTUD6B       | 51633  | 27.4% | 37.6% | 31.9% | 32.3% |
| SH2D4B       | 387694 | 33.3% | 28.4% | 35.1% | 32.3% |
| GIUSBL1      | 387036 | 34.5% | 32.1% | 30.3% | 32.3% |
| GNS          | 2799   | 44.7% | 25.4% | 26.8% | 32.3% |
| MGC17986     | 163071 | 40.7% | 32.1% | 24.1% | 32.3% |
| OR4F3        | 26683  | 29.6% | 30.7% | 36.6% | 32.3% |
| RBM16        | 22828  | 42.0% | 31.2% | 23.7% | 32.3% |
| SOX4         | 6659   | 36.8% | 34.1% | 26.0% | 32.3% |
| NDUFA10      | 4705   | 34.4% | 34.5% | 28.0% | 32.3% |
| FANCG        | 2189   | 46.3% | 24.0% | 26.6% | 32.3% |
| NNT          | 23530  | 34.2% | 33.6% | 29.1% | 32.3% |
| BNIP2        | 663    | 40.9% | 20.9% | 35.1% | 32.3% |
| BZW2         | 28969  | 40.7% | 25.0% | 31.2% | 32.3% |
| TEX27        | 60685  | 33.7% | 29.1% | 34.1% | 32.3% |
| GYPB         | 2994   | 43.9% | 24.9% | 28.1% | 32.3% |
| PAK3         | 5063   | 22.6% | 33.8% | 40.5% | 32.3% |
| VNN3         | 55350  | 36.4% | 28.2% | 32.4% | 32.3% |
| TCHHL1       | 126637 | 40.8% | 29.7% | 26.4% | 32.3% |
| ETV1         | 2115   | 29.6% | 35.1% | 32.2% | 32.3% |
| ORSAN1       | 390195 | 29.5% | 36.5% | 31.0% | 32.3% |
| PCNP         | 57092  | 41.8% | 25.6% | 29.6% | 32.3% |
| SH3BGRL3     | 83442  | 43.8% | 24.3% | 28.9% | 32.3% |
| CYFIP2       | 26999  | 39.6% | 26.5% | 31.0% | 32.3% |
| CHP          | 11261  | 25.2% | 39.7% | 32.1% | 32.3% |
| ZNF623       | 9831   | 32.8% | 29.5% | 34.7% | 32.3% |
| ETV6         | 2120   | 35.7% | 26.5% | 34.8% | 32.3% |
| ECRG4        | 84417  | 28.0% | 29.3% | 39.8% | 32.3% |
| WNT2         | 7472   | 27.3% | 33.8% | 35.9% | 32.3% |
| ORSAY1       | 343170 | 33.3% | 27.2% | 36.5% | 32.3% |
| OR10H1       | 26539  | 38.5% | 26.7% | 31.9% | 32.3% |
| C3orf65      | 646600 | 40.6% | 32.7% | 23.7% | 32.3% |
| HOXC5        | 3222   | 37.9% | 25.5% | 33.6% | 32.4% |
| FLJ35867     | 146050 | 32.5% | 33.1% | 31.4% | 32.4% |
| CDKSRAP2     | 55755  | 45.6% | 32.0% | 19.4% | 32.4% |
| DYRK1B       | 9149   | 20.8% | 44.0% | 32.2% | 32.4% |
| PSIP1        | 11168  | 37.0% | 34.9% | 25.1% | 32.4% |
| C6ORF170     | 221322 | 36.9% | 28.4% | 31.8% | 32.4% |
| CGI-105      | 51011  | 45.4% | 16.3% | 35.3% | 32.4% |
| ING1         | 3621   | 40.4% | 28.0% | 28.7% | 32.4% |
| CDR1         | 1038   | 35.9% | 22.2% | 39.0% | 32.4% |

|               |           |       |       |       |       |
|---------------|-----------|-------|-------|-------|-------|
| MGC27121      | 408263    | 43.8% | 25.2% | 28.2% | 32.4% |
| CLDN12        | 9069      | 35.4% | 28.3% | 33.5% | 32.4% |
| CNTNAP3       | 79937     | 44.4% | 21.9% | 30.9% | 32.4% |
| MTHFD1        | 4522      | 33.3% | 22.6% | 41.2% | 32.4% |
| RBPMS         | 11030     | 30.3% | 39.4% | 27.5% | 32.4% |
| CHERP         | 10523     | 30.4% | 43.1% | 23.7% | 32.4% |
| LARP          | 23367     | 21.7% | 28.1% | 47.4% | 32.4% |
| NUMBL         | 9253      | 36.0% | 34.9% | 26.3% | 32.4% |
| OR6M1         | 390261    | 39.5% | 30.4% | 27.3% | 32.4% |
| GRPEL1        | 80273     | 31.6% | 37.0% | 28.6% | 32.4% |
| FLJ38663      | 91574     | 23.6% | 35.7% | 37.8% | 32.4% |
| TMEM15        | 22845     | 29.9% | 22.2% | 45.1% | 32.4% |
| FLJ14442      | 84871     | 30.9% | 26.2% | 40.2% | 32.4% |
| CLEC7A        | 64581     | 36.5% | 24.0% | 36.6% | 32.4% |
| C8ORF21       | 286046    | 41.7% | 5.6%  | 50.0% | 32.4% |
| TD1           | 100038246 | 25.0% | 25.9% | 46.3% | 32.4% |
| PAK6          | 56924     | 30.7% | 34.0% | 32.6% | 32.4% |
| FLJ32934      | 127579    | 26.8% | 24.6% | 45.8% | 32.4% |
| PROM1         | 8842      | 41.8% | 33.3% | 22.1% | 32.4% |
| WASF2         | 10163     | 34.8% | 30.5% | 31.9% | 32.4% |
| PP8961        | 650662    | 47.3% | 31.8% | 18.2% | 32.4% |
| EPS8L3        | 79574     | 28.6% | 32.8% | 35.9% | 32.4% |
| PKMYT1        | 9088      | 25.0% | 36.5% | 35.7% | 32.4% |
| KIAA1836      | 200014    | 36.7% | 25.9% | 34.7% | 32.4% |
| PCDHAC1       | 56135     | 50.8% | 24.2% | 22.3% | 32.4% |
| RGS21         | 431704    | 33.2% | 36.2% | 27.9% | 32.4% |
| FLJ34389      | 197259    | 30.4% | 32.6% | 34.3% | 32.4% |
| MGC22960      | 387338    | 28.3% | 37.2% | 31.9% | 32.4% |
| RALBP1        | 10928     | 40.9% | 24.9% | 31.5% | 32.4% |
| DKFZP566A1524 | 81553     | 27.8% | 35.1% | 34.3% | 32.4% |
| SYNPO2L       | 79933     | 34.3% | 35.4% | 27.7% | 32.4% |
| CYSLTR1       | 10800     | 29.7% | 27.1% | 40.5% | 32.4% |
| THAP5         | 168451    | 41.4% | 35.6% | 20.3% | 32.4% |
| C10orf96      | 374355    | 36.5% | 30.9% | 29.9% | 32.4% |
| LOC220869     | 220869    | 23.0% | 38.1% | 36.2% | 32.4% |
| KCNH2         | 3757      | 22.4% | 29.8% | 45.1% | 32.4% |
| THEG          | 51298     | 28.6% | 32.0% | 36.8% | 32.4% |
| AARS          | 16        | 36.8% | 33.3% | 27.2% | 32.4% |
| SYP           | 6855      | 35.1% | 38.7% | 23.5% | 32.5% |
| TGM1          | 7051      | 46.3% | 20.5% | 30.6% | 32.5% |
| HSU79303      | 29903     | 22.2% | 33.7% | 41.4% | 32.5% |
| HBP1          | 26959     | 35.6% | 35.3% | 26.4% | 32.5% |
| UBE2W         | 55284     | 32.5% | 31.2% | 33.6% | 32.5% |
| OR13J1        | 392309    | 39.4% | 29.3% | 28.7% | 32.5% |
| LOC143678     | 143678    | 27.9% | 34.2% | 35.3% | 32.5% |
| C20ORF52      | 140823    | 37.2% | 34.2% | 25.9% | 32.5% |
| MGC71993      | 440400    | 35.9% | 43.7% | 17.8% | 32.5% |
| HPCL2         | 26061     | 46.8% | 28.3% | 22.3% | 32.5% |
| REC8L1        | 9985      | 28.5% | 24.1% | 44.8% | 32.5% |
| MGC8407       | 79012     | 36.5% | 36.3% | 24.7% | 32.5% |
| TNFRSF8       | 943       | 44.0% | 23.6% | 29.9% | 32.5% |
| TLN2          | 83660     | 35.5% | 29.1% | 32.9% | 32.5% |
| SCN10A        | 6336      | 33.3% | 31.7% | 32.5% | 32.5% |
| AP4E1         | 23431     | 31.7% | 20.7% | 45.1% | 32.5% |
| PA2G4         | 5036      | 35.7% | 34.4% | 27.4% | 32.5% |
| RP13-36C9.1   | 728911    | 38.4% | 30.0% | 29.1% | 32.5% |
| APBB3         | 10307     | 43.6% | 24.2% | 29.7% | 32.5% |
| FLJ37440      | 129804    | 36.8% | 31.0% | 29.7% | 32.5% |
| PTPLA         | 9200      | 42.5% | 27.7% | 27.4% | 32.5% |
| TMEM50B       | 757       | 32.5% | 32.3% | 32.7% | 32.5% |
| C9ORF67       | 84814     | 32.6% | 30.5% | 34.4% | 32.5% |
| FLJ20516      | 54962     | 37.0% | 23.5% | 37.1% | 32.5% |
| PSMC3         | 5702      | 38.1% | 27.0% | 32.4% | 32.5% |
| GPR62         | 118442    | 30.6% | 26.9% | 40.0% | 32.5% |
| AQP11         | 282679    | 44.0% | 21.8% | 31.7% | 32.5% |
| RHOBTB1       | 9886      | 35.4% | 26.8% | 35.3% | 32.5% |
| GDAP1L1       | 78997     | 42.8% | 22.9% | 31.8% | 32.5% |
| PNMA6A        | 84968     | 42.7% | 27.2% | 27.6% | 32.5% |
| TPSB1         | 7177      | 32.4% | 28.3% | 36.8% | 32.5% |
| DSCR1         | 1827      | 39.0% | 24.5% | 34.0% | 32.5% |
| MSI2          | 124540    | 34.7% | 23.7% | 39.1% | 32.5% |
| NXPB2         | 11249     | 46.5% | 22.9% | 28.2% | 32.5% |
| PIM3          | 415116    | 28.4% | 30.0% | 39.2% | 32.5% |
| PKD3          | 5165      | 31.1% | 34.7% | 31.7% | 32.5% |
| CTNNA1L1      | 8727      | 33.0% | 27.8% | 36.8% | 32.5% |
| TBRG1         | 84897     | 41.5% | 37.6% | 18.4% | 32.5% |
| C14ORF50      | 145376    | 36.3% | 38.5% | 22.9% | 32.5% |
| GPC4          | 2239      | 38.1% | 26.0% | 33.5% | 32.5% |
| HPSE2         | 60495     | 42.0% | 31.6% | 24.1% | 32.5% |
| LOC340069     | 340069    | 48.4% | 23.8% | 25.5% | 32.6% |
| DCTD          | 1635      | 43.8% | 33.7% | 20.2% | 32.6% |
| LOC127540     | 127540    | 32.1% | 21.3% | 44.2% | 32.6% |
| MGC20806      | 201255    | 7.7%  | 40.0% | 50.0% | 32.6% |
| GAS1          | 2619      | 36.4% | 42.5% | 18.8% | 32.6% |
| MGC22776      | 157310    | 32.0% | 20.5% | 45.2% | 32.6% |
| LOC284361     | 284361    | 32.8% | 29.8% | 35.1% | 32.6% |
| BCKDK         | 10295     | 33.0% | 32.9% | 31.8% | 32.6% |
| MIA2          | 117153    | 31.2% | 30.8% | 35.8% | 32.6% |
| LOC389833     | 389833    | 46.6% | 28.5% | 22.8% | 32.6% |
| RARRES3       | 5920      | 42.5% | 19.3% | 36.0% | 32.6% |
| PSG3          | 5671      | 44.7% | 28.4% | 24.6% | 32.6% |
| CHPPR         | 9650      | 28.9% | 35.2% | 33.7% | 32.6% |
| BTBD6         | 90135     | 39.4% | 28.7% | 29.7% | 32.6% |
| LOC388567     | 388567    | 29.8% | 28.0% | 40.0% | 32.6% |
| FLJ33790      | 283212    | 32.0% | 36.5% | 29.3% | 32.6% |
| TOM1          | 10043     | 35.0% | 36.8% | 26.0% | 32.6% |
| ZNF75         | 7626      | 39.6% | 26.1% | 32.2% | 32.6% |
| THADA         | 63892     | 40.5% | 24.4% | 32.9% | 32.6% |

|           |        |       |       |       |       |
|-----------|--------|-------|-------|-------|-------|
| BRCA2     | 675    | 34.9% | 34.7% | 28.2% | 32.6% |
| KIAA1751  | 85452  | 43.6% | 28.7% | 25.5% | 32.6% |
| WDR36     | 134430 | 44.9% | 23.7% | 29.2% | 32.6% |
| C10ORF67  | 256815 | 41.9% | 26.0% | 30.0% | 32.6% |
| TCF7L2    | 6934   | 43.6% | 27.8% | 26.5% | 32.6% |
| C20ORF35  | 55861  | 28.9% | 36.2% | 32.7% | 32.6% |
| FCRH3     | 115352 | 29.1% | 38.2% | 30.5% | 32.6% |
| RIF1      | 55183  | 31.4% | 35.4% | 31.1% | 32.6% |
| BIG1      | 10565  | 28.3% | 28.9% | 40.8% | 32.6% |
| C19ORF25  | 148223 | 42.4% | 34.0% | 21.4% | 32.6% |
| WDR40A    | 25853  | 39.3% | 33.2% | 25.4% | 32.6% |
| C6ORF203  | 51250  | 47.6% | 23.7% | 26.6% | 32.6% |
| ADAM18    | 8749   | 30.8% | 36.5% | 30.6% | 32.6% |
| BC008967  | 89927  | 32.7% | 28.8% | 36.5% | 32.6% |
| C20ORF185 | 359710 | 40.1% | 27.3% | 30.5% | 32.6% |
| STK25     | 10494  | 26.2% | 36.6% | 35.2% | 32.6% |
| TAF2      | 6873   | 29.5% | 32.5% | 36.0% | 32.7% |
| RBP1      | 5947   | 41.4% | 28.5% | 28.1% | 32.7% |
| ECGF1     | 1890   | 42.0% | 29.3% | 26.7% | 32.7% |
| ZFP91     | 80829  | 36.5% | 33.2% | 28.3% | 32.7% |
| FANCF     | 2188   | 37.0% | 37.0% | 24.0% | 32.7% |
| VPS45A    | 11311  | 36.4% | 30.2% | 31.4% | 32.7% |
| GREM2     | 64388  | 34.2% | 28.9% | 34.8% | 32.7% |
| MGC52110  | 493753 | 44.1% | 24.4% | 29.5% | 32.7% |
| ATP2A3    | 489    | 40.9% | 29.7% | 27.4% | 32.7% |
| ASB5      | 140458 | 27.7% | 36.6% | 33.7% | 32.7% |
| MGC24975  | 163154 | 43.3% | 26.5% | 28.2% | 32.7% |
| SLC6A4    | 6532   | 45.4% | 26.9% | 25.8% | 32.7% |
| POF1B     | 79983  | 31.4% | 31.8% | 34.9% | 32.7% |
| OR2K2     | 26248  | 40.2% | 32.6% | 25.3% | 32.7% |
| ATCAY     | 85300  | 35.0% | 33.2% | 29.9% | 32.7% |
| ZBTB1     | 22890  | 30.1% | 30.9% | 37.1% | 32.7% |
| C2ORF27   | 29798  | 37.5% | 36.4% | 24.2% | 32.7% |
| ARHGAP25  | 9938   | 36.9% | 32.4% | 28.8% | 32.7% |
| KIAA0980  | 22981  | 38.9% | 23.8% | 35.4% | 32.7% |
| KRTHA7    | 8688   | 40.7% | 28.6% | 28.8% | 32.7% |
| HTPAP     | 84513  | 34.5% | 25.4% | 38.2% | 32.7% |
| DSG1      | 1828   | 43.5% | 23.8% | 30.8% | 32.7% |
| SP8       | 221833 | 45.6% | 26.0% | 26.6% | 32.7% |
| C14orf174 | 161394 | 31.4% | 32.4% | 34.4% | 32.7% |
| COPS7B    | 64708  | 34.5% | 39.9% | 23.8% | 32.7% |
| CD22      | 933    | 36.5% | 26.9% | 34.8% | 32.7% |
| C20ORF178 | 128866 | 24.4% | 27.6% | 46.2% | 32.7% |
| OR10X1    | 128367 | 40.8% | 24.5% | 32.8% | 32.7% |
| PAQR7     | 164091 | 41.2% | 29.2% | 27.7% | 32.7% |
| ZNF554    | 115196 | 38.8% | 25.0% | 34.4% | 32.7% |
| PRL       | 5617   | 39.3% | 28.7% | 30.2% | 32.7% |
| NFE2L3    | 9603   | 39.6% | 28.0% | 30.6% | 32.7% |
| ZDHH8     | 29801  | 38.2% | 33.3% | 26.7% | 32.7% |
| RBM28     | 55131  | 30.1% | 33.3% | 34.8% | 32.7% |
| ANKRD21   | 317754 | 39.0% | 24.9% | 34.3% | 32.7% |
| HUS1B     | 135458 | 38.7% | 26.1% | 33.3% | 32.7% |
| ZFYVE21   | 79038  | 40.7% | 25.5% | 32.0% | 32.7% |
| FUCA2     | 2519   | 44.3% | 26.4% | 27.5% | 32.7% |
| BACE1     | 23621  | 43.2% | 26.6% | 28.4% | 32.7% |
| KIAA0895  | 23366  | 33.1% | 23.0% | 42.1% | 32.7% |
| NPM3      | 10360  | 44.3% | 27.7% | 26.3% | 32.7% |
| PHYHIP    | 9796   | 42.7% | 30.5% | 25.1% | 32.8% |
| RFC2      | 5982   | 44.4% | 27.3% | 26.6% | 32.8% |
| AKR1B1    | 231    | 38.7% | 25.0% | 34.6% | 32.8% |
| RPL10     | 6134   | 41.0% | 28.6% | 28.7% | 32.8% |
| ZNF556    | 80032  | 34.2% | 32.0% | 32.1% | 32.8% |
| OR6K3     | 391114 | 40.1% | 23.9% | 34.3% | 32.8% |
| LOC157657 | 157657 | 34.3% | 35.3% | 28.7% | 32.8% |
| GFAP      | 2670   | 40.2% | 33.1% | 25.0% | 32.8% |
| TMSL3     | 7117   | 33.0% | 32.2% | 33.1% | 32.8% |
| SLC22A6   | 9356   | 36.4% | 27.6% | 34.4% | 32.8% |
| PAX5      | 5079   | 43.0% | 22.9% | 32.5% | 32.8% |
| LRP5      | 4041   | 39.7% | 33.5% | 25.2% | 32.8% |
| ARF6      | 382    | 40.6% | 30.3% | 27.4% | 32.8% |
| YKT6      | 10652  | 32.2% | 40.9% | 25.3% | 32.8% |
| ZCCHC10   | 54819  | 43.2% | 28.9% | 26.3% | 32.8% |
| ZNF323    | 64288  | 35.2% | 30.4% | 32.8% | 32.8% |
| GNAT1     | 2779   | 25.8% | 34.0% | 38.6% | 32.8% |
| LY6G5B    | 58496  | 35.5% | 39.4% | 23.5% | 32.8% |
| SLC9A7    | 84679  | 42.5% | 31.1% | 24.8% | 32.8% |
| LOC497661 | 497661 | 36.6% | 30.7% | 31.1% | 32.8% |
| LOC391059 | 391059 | 30.5% | 27.3% | 40.6% | 32.8% |
| ZNF288    | 26137  | 31.0% | 21.4% | 46.0% | 32.8% |
| CLEC14A   | 161198 | 35.3% | 26.4% | 36.7% | 32.8% |
| FLJ10534  | 55720  | 37.0% | 37.5% | 24.0% | 32.8% |
| TRAPP4    | 51399  | 36.5% | 29.1% | 32.9% | 32.8% |
| DAAM1     | 23002  | 38.4% | 33.9% | 26.3% | 32.8% |
| DCK       | 1633   | 31.0% | 32.8% | 34.6% | 32.8% |
| AGPAT5    | 55326  | 41.2% | 26.6% | 30.7% | 32.8% |
| PZP       | 5858   | 47.3% | 31.0% | 20.2% | 32.8% |
| ERH       | 2079   | 47.6% | 23.5% | 27.4% | 32.8% |
| C1QTNF3   | 114899 | 29.7% | 35.5% | 33.3% | 32.8% |
| BNC2      | 54796  | 37.1% | 27.7% | 33.7% | 32.8% |
| COMMD3    | 23412  | 32.6% | 28.4% | 37.6% | 32.9% |
| SORBS1    | 10580  | 43.6% | 25.8% | 29.1% | 32.9% |
| FGF7      | 2252   | 37.2% | 29.1% | 32.3% | 32.9% |
| HK2       | 3099   | 37.1% | 31.3% | 30.2% | 32.9% |
| C1QDC1    | 65981  | 26.4% | 33.3% | 38.9% | 32.9% |
| LRP1B     | 53353  | 43.6% | 28.0% | 26.9% | 32.9% |
| PRC1      | 9055   | 32.5% | 39.7% | 26.4% | 32.9% |
| C14ORF140 | 79696  | 51.5% | 15.9% | 31.2% | 32.9% |
| ATP6V1G3  | 127124 | 43.8% | 22.9% | 31.9% | 32.9% |

|               |        |       |       |       |       |
|---------------|--------|-------|-------|-------|-------|
| PWWP2         | 170394 | 36.2% | 38.1% | 24.4% | 32.9% |
| NPEPPS        | 9520   | 32.7% | 36.6% | 29.4% | 32.9% |
| TIEG2         | 8462   | 49.2% | 24.9% | 24.6% | 32.9% |
| C18ORF21      | 83608  | 35.6% | 29.8% | 33.2% | 32.9% |
| MGC62094      | 203569 | 28.6% | 31.5% | 38.6% | 32.9% |
| THSD6         | 339366 | 26.6% | 28.5% | 43.6% | 32.9% |
| C2ORF30       | 27248  | 34.0% | 32.0% | 32.6% | 32.9% |
| ZNF488        | 118738 | 44.6% | 23.2% | 31.0% | 32.9% |
| LOC387856     | 387856 | 38.3% | 31.9% | 28.5% | 32.9% |
| BCAS2         | 10286  | 36.1% | 28.0% | 34.6% | 32.9% |
| INCA          | 440068 | 44.3% | 31.0% | 23.4% | 32.9% |
| FSTL4         | 23105  | 31.9% | 37.9% | 28.9% | 32.9% |
| AP2A1         | 160    | 40.0% | 38.5% | 20.3% | 32.9% |
| GPR112        | 139378 | 36.2% | 36.7% | 25.9% | 32.9% |
| LHFP          | 10186  | 43.2% | 27.1% | 28.4% | 32.9% |
| RABEP2        | 79874  | 43.1% | 29.9% | 25.8% | 32.9% |
| SNX4          | 8723   | 23.4% | 32.8% | 42.6% | 32.9% |
| OR1L8         | 138881 | 44.6% | 27.3% | 26.9% | 32.9% |
| NEBL          | 10529  | 39.2% | 22.0% | 37.6% | 32.9% |
| MAP2K6        | 5608   | 30.7% | 30.0% | 38.2% | 32.9% |
| SYS1          | 90196  | 32.4% | 36.5% | 30.0% | 32.9% |
| PLP1          | 5354   | 34.1% | 31.5% | 33.2% | 32.9% |
| NSMAF         | 8439   | 44.2% | 29.3% | 25.4% | 32.9% |
| LOC162993     | 162993 | 28.2% | 31.3% | 39.3% | 32.9% |
| IL10          | 3586   | 34.9% | 27.1% | 36.9% | 32.9% |
| TDRD6         | 221400 | 46.2% | 29.5% | 23.2% | 33.0% |
| ZNFN1A4       | 64375  | 24.5% | 36.6% | 37.7% | 33.0% |
| ALS2          | 57679  | 44.7% | 27.6% | 26.5% | 33.0% |
| CXORF21       | 80231  | 31.5% | 28.5% | 38.9% | 33.0% |
| GGTLA1        | 2687   | 29.4% | 42.5% | 27.0% | 33.0% |
| SUSD2         | 56241  | 35.6% | 31.4% | 31.9% | 33.0% |
| KIAA0280      | 23201  | 46.5% | 29.0% | 23.3% | 33.0% |
| LRIG2         | 9860   | 45.5% | 20.4% | 33.0% | 33.0% |
| LOC389827     | 389827 | 37.1% | 27.7% | 34.0% | 33.0% |
| LOC652968     | 652968 | 32.8% | 40.3% | 25.9% | 33.0% |
| LILRB1        | 10859  | 44.2% | 17.8% | 36.9% | 33.0% |
| ARL4D         | 379    | 37.5% | 9.8%  | 51.6% | 33.0% |
| SACS          | 26278  | 37.9% | 31.3% | 29.8% | 33.0% |
| IL17B         | 27190  | 40.3% | 24.2% | 34.4% | 33.0% |
| DCDC1         | 341019 | 41.8% | 23.8% | 33.3% | 33.0% |
| ZNF404        | 342908 | 48.6% | 23.2% | 27.2% | 33.0% |
| NPFF          | 8620   | 37.5% | 25.8% | 35.7% | 33.0% |
| LIN10         | 80262  | 39.3% | 27.5% | 32.1% | 33.0% |
| TCEA2         | 6919   | 42.3% | 30.1% | 26.6% | 33.0% |
| LDHAL6B       | 92483  | 32.0% | 34.4% | 32.6% | 33.0% |
| C19ORF4       | 25789  | 27.7% | 25.7% | 45.7% | 33.0% |
| TAS2R8        | 50836  | 39.0% | 28.2% | 31.8% | 33.0% |
| RUTBC2        | 129049 | 39.3% | 23.3% | 36.4% | 33.0% |
| HIST2H4       | 8370   | 35.1% | 33.3% | 30.7% | 33.0% |
| STX1A         | 6804   | 33.9% | 28.2% | 37.0% | 33.0% |
| CGI-30        | 51611  | 42.0% | 26.8% | 30.3% | 33.0% |
| TMSB4Y        | 9087   | 44.6% | 23.5% | 31.0% | 33.0% |
| TPBG          | 7162   | 52.6% | 20.5% | 26.0% | 33.0% |
| RAP1GA1       | 5909   | 52.2% | 14.5% | 32.5% | 33.0% |
| KRTAP9-3      | 83900  | 34.2% | 36.1% | 28.8% | 33.0% |
| LOC115548     | 115548 | 22.6% | 43.8% | 32.8% | 33.0% |
| ACVR1         | 90     | 30.4% | 32.9% | 35.8% | 33.0% |
| SCFD1         | 23256  | 33.3% | 17.6% | 48.1% | 33.0% |
| INADL         | 10207  | 39.1% | 31.0% | 29.1% | 33.0% |
| GRB14         | 2888   | 39.9% | 29.5% | 29.8% | 33.0% |
| KIAA1704      | 55425  | 30.3% | 33.0% | 35.9% | 33.0% |
| LOC347273     | 347273 | 40.8% | 24.1% | 34.3% | 33.0% |
| FLJ43582      | 389649 | 50.0% | 24.2% | 25.0% | 33.1% |
| COX7B2        | 170712 | 44.2% | 25.9% | 29.1% | 33.1% |
| EZH1          | 2145   | 40.7% | 28.1% | 30.4% | 33.1% |
| TAS1R1        | 80835  | 29.4% | 27.3% | 42.5% | 33.1% |
| SIDT1         | 54847  | 37.7% | 22.2% | 39.3% | 33.1% |
| CDC6          | 990    | 42.0% | 23.5% | 33.7% | 33.1% |
| CA7           | 766    | 31.7% | 26.5% | 41.1% | 33.1% |
| KIAA1822      | 84439  | 29.8% | 33.1% | 36.4% | 33.1% |
| KLHL6         | 89857  | 28.8% | 31.0% | 39.5% | 33.1% |
| FLJ31031      | 199990 | 31.1% | 30.4% | 37.7% | 33.1% |
| NFKBIL2       | 4796   | 43.3% | 29.2% | 26.8% | 33.1% |
| CCNB3         | 85417  | 40.9% | 23.1% | 35.2% | 33.1% |
| DOCK7         | 85440  | 38.7% | 29.7% | 31.0% | 33.1% |
| CDH2          | 1000   | 34.3% | 34.9% | 30.1% | 33.1% |
| GNGT2         | 2793   | 45.2% | 29.0% | 25.2% | 33.1% |
| YOD1          | 55432  | 35.0% | 30.4% | 33.9% | 33.1% |
| CAMK2A        | 815    | 26.4% | 36.5% | 36.4% | 33.1% |
| DSCAML1       | 57453  | 47.4% | 23.8% | 28.1% | 33.1% |
| FCN1          | 2219   | 37.9% | 36.1% | 25.4% | 33.1% |
| REA           | 11331  | 36.8% | 29.5% | 33.1% | 33.1% |
| C20ORF6       | 51575  | 39.7% | 28.7% | 31.0% | 33.1% |
| Sep-11        | 55752  | 40.5% | 32.6% | 26.3% | 33.1% |
| ZNF23         | 7571   | 36.7% | 32.3% | 30.4% | 33.1% |
| POLD3         | 10714  | 43.1% | 29.6% | 26.7% | 33.1% |
| ZNF18         | 7566   | 28.1% | 33.9% | 37.4% | 33.1% |
| GGA1          | 26088  | 48.0% | 29.0% | 22.4% | 33.1% |
| PPAP2B        | 8613   | 36.3% | 36.7% | 26.4% | 33.1% |
| PEX14         | 5195   | 41.7% | 33.3% | 24.4% | 33.1% |
| PFDN5         | 5204   | 37.4% | 22.2% | 39.8% | 33.1% |
| VPS28         | 51160  | 40.0% | 29.8% | 29.7% | 33.1% |
| RNF128        | 79589  | 37.6% | 38.7% | 23.2% | 33.2% |
| DKFZP434A1319 | 84080  | 24.7% | 34.0% | 40.7% | 33.2% |
| LOC157378     | 157378 | 43.6% | 29.4% | 26.4% | 33.2% |
| OR3A2         | 4995   | 30.9% | 32.2% | 36.4% | 33.2% |
| REXO1         | 57455  | 43.6% | 24.1% | 31.8% | 33.2% |
| MGC33648      | 133383 | 42.6% | 29.5% | 27.4% | 33.2% |

|             |           |       |       |       |       |
|-------------|-----------|-------|-------|-------|-------|
| KIF21B      | 23046     | 36.0% | 36.2% | 27.3% | 33.2% |
| PFN4        | 375189    | 37.6% | 35.3% | 26.5% | 33.2% |
| OR1E2       | 8388      | 37.9% | 33.7% | 27.9% | 33.2% |
| ZNF167      | 55888     | 39.8% | 31.6% | 28.2% | 33.2% |
| C10ORF107   | 219621    | 36.0% | 29.3% | 34.2% | 33.2% |
| CRISPLD2    | 83716     | 36.1% | 26.6% | 36.9% | 33.2% |
| SPATA12     | 353324    | 49.2% | 21.3% | 29.1% | 33.2% |
| MCCC1       | 56922     | 32.2% | 28.0% | 39.4% | 33.2% |
| LOC646174   | 646174    | 44.9% | 23.5% | 31.2% | 33.2% |
| CPE         | 1363      | 33.2% | 38.1% | 28.3% | 33.2% |
| BTEB1       | 687       | 51.9% | 22.5% | 25.3% | 33.2% |
| RRM2B       | 50484     | 37.4% | 26.8% | 35.4% | 33.2% |
| LOC157708   | 157708    | 34.9% | 30.0% | 34.7% | 33.2% |
| URB1        | 9875      | 38.3% | 24.0% | 37.3% | 33.2% |
| RAET1G      | 353091    | 50.0% | 26.6% | 23.1% | 33.2% |
| UNQ689      | 401138    | 35.1% | 21.9% | 42.6% | 33.2% |
| ALS2CR7     | 65061     | 37.6% | 33.5% | 28.5% | 33.2% |
| IL27RA      | 9466      | 44.6% | 21.5% | 33.5% | 33.2% |
| MTA2        | 9219      | 46.8% | 16.0% | 36.9% | 33.2% |
| PRLR        | 5618      | 30.6% | 36.7% | 32.4% | 33.2% |
| ATP10D      | 57205     | 34.8% | 34.7% | 30.1% | 33.2% |
| TRAM1L1     | 133022    | 28.6% | 32.1% | 39.0% | 33.2% |
| ORS2A4      | 390053    | 37.9% | 33.8% | 28.0% | 33.2% |
| SDC4        | 6385      | 38.9% | 38.3% | 22.5% | 33.2% |
| FLJ20245    | 54863     | 35.1% | 26.6% | 38.0% | 33.2% |
| TRAF7       | 84231     | 37.5% | 23.3% | 38.9% | 33.2% |
| ATP1A4      | 480       | 46.2% | 26.0% | 27.6% | 33.2% |
| DKFZP564157 | 54458     | 33.6% | 30.9% | 35.3% | 33.2% |
| PTPRN2      | 5799      | 35.3% | 31.7% | 32.8% | 33.2% |
| TRIM16      | 10626     | 44.0% | 25.4% | 30.3% | 33.3% |
| CATSPER1    | 117144    | 41.3% | 14.3% | 44.2% | 33.3% |
| NDRG2       | 57447     | 30.8% | 40.2% | 28.8% | 33.3% |
| hCG_2036778 | 100169851 | 30.7% | 28.0% | 41.1% | 33.3% |
| FAM57B      | 83723     | 35.8% | 35.0% | 29.1% | 33.3% |
| LOC387923   | 387923    | 42.9% | 27.6% | 29.3% | 33.3% |
| AP2A2       | 161       | 40.4% | 25.4% | 34.0% | 33.3% |
| ARL5        | 26225     | 51.1% | 31.3% | 17.4% | 33.3% |
| C6orf190    | 387357    | 40.3% | 28.2% | 31.3% | 33.3% |
| ZNF165      | 7718      | 33.0% | 32.1% | 34.7% | 33.3% |
| ALG6        | 29929     | 34.6% | 28.8% | 36.4% | 33.3% |
| MMP21       | 118856    | 37.8% | 32.0% | 30.1% | 33.3% |
| AXL         | 558       | 35.2% | 31.2% | 33.5% | 33.3% |
| FLJ46247    | 374786    | 24.7% | 34.2% | 41.0% | 33.3% |
| FLJ44048    | 401024    | 46.4% | 30.6% | 23.0% | 33.3% |
| A2BP1       | 54715     | 37.3% | 26.7% | 35.9% | 33.3% |
| NOTCH4      | 4855      | 42.3% | 30.3% | 27.4% | 33.3% |
| FLJ20097    | 55610     | 38.1% | 23.7% | 38.2% | 33.3% |
| PPP1R14D    | 54866     | 41.1% | 29.1% | 29.7% | 33.3% |
| MAGEF1      | 64110     | 36.8% | 31.3% | 31.8% | 33.3% |
| SH3GLB2     | 56904     | 36.7% | 36.0% | 27.3% | 33.3% |
| MRGPRX3     | 117195    | 29.2% | 34.4% | 36.4% | 33.3% |
| PFDN4       | 5203      | 46.1% | 25.5% | 28.4% | 33.3% |
| SPATA13     | 221178    | 47.3% | 24.5% | 28.2% | 33.3% |
| FAPP2       | 84725     | 27.5% | 33.8% | 38.7% | 33.4% |
| ADH1C       | 126       | 34.1% | 22.5% | 43.4% | 33.4% |
| SLC9A2      | 6549      | 45.8% | 23.7% | 30.5% | 33.4% |
| FGF10       | 2255      | 40.3% | 22.4% | 37.4% | 33.4% |
| THRAP4      | 9862      | 42.5% | 25.5% | 32.1% | 33.4% |
| USMG5       | 84833     | 44.4% | 25.2% | 30.5% | 33.4% |
| DNMT2       | 1787      | 40.3% | 33.9% | 25.9% | 33.4% |
| CST3        | 1471      | 58.1% | 20.2% | 21.9% | 33.4% |
| CLDN11      | 5010      | 40.5% | 27.5% | 32.1% | 33.4% |
| HNRPM       | 4670      | 47.2% | 23.1% | 29.8% | 33.4% |
| CTAG2       | 30848     | 38.8% | 27.3% | 34.0% | 33.4% |
| FLJ37357    | 284944    | 49.1% | 28.7% | 22.3% | 33.4% |
| CXXC6       | 80312     | 34.4% | 25.5% | 40.2% | 33.4% |
| OBFC1       | 79991     | 37.5% | 33.1% | 29.6% | 33.4% |
| LOC198437   | 198437    | 29.0% | 35.3% | 35.9% | 33.4% |
| VN1R1       | 57191     | 30.9% | 34.9% | 34.4% | 33.4% |
| USH2A       | 7399      | 39.4% | 35.4% | 25.4% | 33.4% |
| ZNF154      | 7710      | 50.0% | 19.9% | 30.3% | 33.4% |
| DIAPH2      | 1730      | 38.6% | 37.4% | 24.2% | 33.4% |
| C20ORF152   | 140894    | 25.9% | 31.9% | 42.4% | 33.4% |
| C9ORF9      | 11092     | 45.6% | 30.6% | 24.0% | 33.4% |
| ZNF131      | 7690      | 38.4% | 29.4% | 32.4% | 33.4% |
| MS4A6A      | 64231     | 35.9% | 28.1% | 36.2% | 33.4% |
| DCL-1       | 9936      | 39.6% | 29.4% | 31.2% | 33.4% |
| PLXNA2      | 5362      | 38.0% | 34.3% | 27.9% | 33.4% |
| RNF141      | 50862     | 30.7% | 36.3% | 33.3% | 33.4% |
| ZNF585A     | 199704    | 44.2% | 30.0% | 26.0% | 33.4% |
| TMEM23      | 259230    | 33.3% | 22.3% | 44.6% | 33.4% |
| LRSAM1      | 90678     | 30.2% | 27.0% | 43.0% | 33.4% |
| LOC130074   | 130074    | 34.8% | 30.9% | 34.5% | 33.4% |
| LAF4        | 3899      | 41.1% | 31.4% | 27.7% | 33.4% |
| RAD1        | 5810      | 33.3% | 30.4% | 36.5% | 33.4% |
| RBMS3       | 27303     | 50.4% | 23.1% | 26.8% | 33.4% |
| NIN         | 51199     | 23.9% | 35.2% | 41.2% | 33.4% |
| PRPS1       | 5631      | 27.5% | 40.9% | 31.9% | 33.4% |
| UQCRC2      | 7385      | 35.8% | 40.3% | 24.2% | 33.4% |
| TF          | 7018      | 37.0% | 24.8% | 38.6% | 33.4% |
| ARHGEF2     | 9181      | 50.0% | 30.8% | 19.5% | 33.4% |
| HRB         | 3267      | 39.5% | 23.1% | 37.7% | 33.4% |
| FDX1        | 2230      | 37.9% | 31.1% | 31.4% | 33.4% |
| UBTF        | 7343      | 30.8% | 26.1% | 43.5% | 33.4% |
| PMS2        | 5395      | 40.3% | 32.2% | 27.8% | 33.4% |
| SLC19A1     | 6573      | 37.9% | 34.2% | 28.3% | 33.4% |
| GHTM        | 27069     | 42.8% | 33.0% | 24.6% | 33.5% |
| JAPP        | 3375      | 33.8% | 26.3% | 40.2% | 33.5% |

|              |        |       |       |       |       |
|--------------|--------|-------|-------|-------|-------|
| MATP         | 51151  | 32.8% | 28.4% | 39.2% | 33.5% |
| DTNBP1       | 84062  | 53.6% | 27.8% | 18.9% | 33.5% |
| BET1         | 10282  | 33.6% | 34.7% | 32.1% | 33.5% |
| LOC442578    | 442578 | 38.3% | 34.2% | 27.8% | 33.5% |
| FLJ10871     | 55756  | 30.4% | 33.8% | 36.2% | 33.5% |
| SMPDL3A      | 10924  | 43.5% | 32.4% | 24.5% | 33.5% |
| NOS1         | 4842   | 41.8% | 31.1% | 27.6% | 33.5% |
| NLRCS        | 84166  | 48.8% | 22.2% | 29.5% | 33.5% |
| LOC374946    | 374946 | 31.1% | 32.1% | 37.3% | 33.5% |
| TCF21        | 6943   | 38.8% | 27.6% | 34.1% | 33.5% |
| APOL6        | 80830  | 38.0% | 23.4% | 39.1% | 33.5% |
| SYNGR3       | 9143   | 44.1% | 34.9% | 21.5% | 33.5% |
| RAP1B        | 5908   | 53.0% | 20.2% | 27.3% | 33.5% |
| DSPG3        | 1833   | 29.2% | 30.3% | 41.0% | 33.5% |
| CAPNS2       | 84290  | 41.1% | 28.8% | 30.7% | 33.5% |
| MYL5         | 4636   | 39.9% | 24.9% | 35.8% | 33.5% |
| PGDS         | 27306  | 38.5% | 32.2% | 29.9% | 33.5% |
| AK5          | 26289  | 31.6% | 34.7% | 34.3% | 33.5% |
| DCP1B        | 196513 | 32.5% | 23.9% | 44.3% | 33.5% |
| OR3A1        | 4994   | 48.4% | 30.0% | 22.2% | 33.5% |
| P DPR        | 55066  | 52.9% | 19.1% | 28.6% | 33.5% |
| DKFZP761H079 | 200894 | 24.3% | 43.2% | 33.1% | 33.5% |
| SYCP2        | 10388  | 33.1% | 30.4% | 37.1% | 33.5% |
| ECSM2        | 641700 | 43.8% | 20.7% | 36.2% | 33.6% |
| GPS2         | 2874   | 33.5% | 31.6% | 35.5% | 33.6% |
| MGC50722     | 399693 | 46.1% | 25.5% | 29.1% | 33.6% |
| ORSAR1       | 219493 | 50.0% | 27.1% | 23.6% | 33.6% |
| UROD         | 7389   | 37.2% | 37.8% | 25.7% | 33.6% |
| NUCB2        | 4925   | 41.7% | 34.4% | 24.7% | 33.6% |
| CIG5         | 91543  | 45.7% | 28.3% | 26.8% | 33.6% |
| SYAP1        | 94056  | 46.3% | 13.4% | 41.1% | 33.6% |
| SOD1         | 6647   | 39.4% | 36.2% | 25.2% | 33.6% |
| GZMB         | 3002   | 37.2% | 34.5% | 29.1% | 33.6% |
| XKRY         | 9082   | 34.0% | 34.2% | 32.6% | 33.6% |
| ZFD25        | 51427  | 32.3% | 31.6% | 37.0% | 33.6% |
| ZNF184       | 7738   | 37.4% | 35.3% | 28.0% | 33.6% |
| MASK-BP3     | 404734 | 45.9% | 34.9% | 20.0% | 33.6% |
| SLC25A5      | 292    | 36.7% | 31.5% | 32.6% | 33.6% |
| MUC13        | 56667  | 41.3% | 18.2% | 41.3% | 33.6% |
| PCDHB14      | 56122  | 35.9% | 32.8% | 32.2% | 33.6% |
| MRGPRD       | 116512 | 31.0% | 32.8% | 37.1% | 33.6% |
| BTN3A3       | 10384  | 38.6% | 23.7% | 38.6% | 33.6% |
| LCN1         | 3933   | 44.7% | 28.1% | 28.0% | 33.6% |
| GL004        | 56947  | 44.1% | 22.7% | 34.1% | 33.6% |
| UMP-CMPK     | 51727  | 31.3% | 42.7% | 26.9% | 33.6% |
| NDP52        | 10241  | 39.3% | 22.9% | 38.7% | 33.6% |
| AP1S2        | 8905   | 37.6% | 32.7% | 30.7% | 33.6% |
| HCCA2        | 81532  | 50.4% | 19.1% | 31.5% | 33.6% |
| JUP          | 3728   | 44.3% | 30.3% | 26.2% | 33.6% |
| ASAM         | 79827  | 43.4% | 29.0% | 28.6% | 33.6% |
| ZNF258       | 9204   | 37.7% | 32.0% | 31.3% | 33.6% |
| DKFZP564O123 | 25978  | 28.4% | 43.2% | 29.4% | 33.7% |
| GPR63        | 81491  | 34.1% | 32.5% | 34.4% | 33.7% |
| RKHD3        | 84206  | 45.5% | 26.3% | 29.2% | 33.7% |
| GAGEC1       | 9506   | 44.8% | 28.1% | 28.1% | 33.7% |
| ADRA2C       | 152    | 41.0% | 33.8% | 26.3% | 33.7% |
| RFPL2        | 10739  | 34.8% | 21.8% | 44.4% | 33.7% |
| FAM149B1     | 317662 | 40.4% | 31.9% | 28.7% | 33.7% |
| PLEKHM1      | 9842   | 33.3% | 24.3% | 43.5% | 33.7% |
| PTPRJ        | 5795   | 29.7% | 38.6% | 32.8% | 33.7% |
| UBE2NL       | 389898 | 41.2% | 29.2% | 30.8% | 33.7% |
| CHURC1       | 91612  | 32.3% | 36.3% | 32.5% | 33.7% |
| HSZFP36      | 55552  | 32.5% | 34.9% | 33.8% | 33.7% |
| IL17RC       | 84818  | 35.2% | 24.8% | 41.2% | 33.7% |
| COQ2         | 27235  | 37.9% | 28.2% | 35.1% | 33.7% |
| FLJ40235     | 284369 | 38.5% | 27.7% | 34.9% | 33.7% |
| ORZT5        | 401993 | 31.3% | 30.8% | 39.1% | 33.7% |
| NRD1         | 4898   | 39.8% | 20.6% | 40.7% | 33.7% |
| PSG7         | 5676   | 40.8% | 27.8% | 32.5% | 33.7% |
| DEFB115      | 245929 | 33.3% | 33.8% | 34.0% | 33.7% |
| ZNF43        | 7594   | 35.5% | 29.8% | 35.8% | 33.7% |
| NCOA6IP      | 96764  | 45.3% | 29.9% | 26.0% | 33.7% |
| TSC          | 54997  | 40.4% | 21.8% | 39.0% | 33.7% |
| ABCA1        | 19     | 44.9% | 35.1% | 21.1% | 33.7% |
| ARL4A        | 10124  | 38.4% | 30.1% | 32.7% | 33.7% |
| PQBP1        | 10084  | 39.4% | 32.9% | 28.9% | 33.7% |
| DDT          | 1652   | 26.7% | 13.0% | 61.5% | 33.7% |
| MGC34646     | 157807 | 40.0% | 31.3% | 29.9% | 33.8% |
| KLF12        | 11278  | 44.0% | 27.6% | 29.7% | 33.8% |
| MPV17        | 4358   | 38.9% | 35.2% | 27.2% | 33.8% |
| HOXB1        | 3211   | 45.3% | 28.1% | 27.9% | 33.8% |
| K6IRS3       | 319101 | 30.7% | 27.2% | 43.3% | 33.8% |
| MRPL52       | 122704 | 37.7% | 34.4% | 29.3% | 33.8% |
| SSR4         | 6748   | 37.5% | 34.6% | 29.2% | 33.8% |
| DKFZP434I092 | 26166  | 32.9% | 22.5% | 45.9% | 33.8% |
| CAMLG        | 819    | 35.6% | 33.1% | 32.6% | 33.8% |
| MRPS34       | 65993  | 47.4% | 30.7% | 23.3% | 33.8% |
| ZNF224       | 7767   | 44.9% | 33.0% | 23.4% | 33.8% |
| GNAI1        | 2770   | 43.8% | 25.0% | 32.6% | 33.8% |
| ANAPC10      | 10393  | 41.1% | 35.0% | 25.3% | 33.8% |
| RPGRIP1      | 57096  | 24.4% | 28.3% | 48.6% | 33.8% |
| PIK3R1       | 5295   | 23.8% | 39.8% | 37.8% | 33.8% |
| FLJ20551     | 54977  | 33.3% | 36.8% | 31.3% | 33.8% |
| HIST1H2BB    | 3018   | 43.4% | 29.1% | 29.0% | 33.8% |
| CHML         | 1122   | 49.8% | 32.1% | 19.6% | 33.8% |
| C14ORF135    | 64430  | 55.3% | 25.6% | 20.6% | 33.8% |
| FARP2        | 9855   | 35.4% | 29.7% | 36.3% | 33.8% |
| CARF         | 55602  | 34.4% | 31.3% | 35.7% | 33.8% |

|               |        |       |       |       |       |
|---------------|--------|-------|-------|-------|-------|
| SPAS1         | 219938 | 23.4% | 43.7% | 34.3% | 33.8% |
| PLEK          | 5341   | 30.7% | 30.9% | 39.9% | 33.8% |
| AMACR         | 23600  | 39.8% | 38.9% | 22.8% | 33.8% |
| NDUFA8        | 4702   | 45.5% | 25.4% | 30.6% | 33.8% |
| COL12A1       | 1303   | 45.6% | 27.9% | 28.0% | 33.8% |
| C13ORF23      | 80209  | 43.2% | 28.0% | 30.4% | 33.8% |
| DKFZP434K1815 | 222229 | 41.8% | 30.8% | 28.9% | 33.8% |
| \$PATA4       | 132851 | 40.1% | 24.6% | 36.8% | 33.8% |
| CAPSL         | 133690 | 38.7% | 37.3% | 25.6% | 33.8% |
| IGSF3         | 3321   | 30.8% | 37.4% | 33.3% | 33.8% |
| DFNB59        | 494513 | 40.8% | 32.5% | 28.3% | 33.9% |
| PODXL2        | 50512  | 45.5% | 26.3% | 29.8% | 33.9% |
| CKS2          | 1164   | 39.0% | 32.8% | 29.8% | 33.9% |
| PTPRF         | 5792   | 42.4% | 35.6% | 23.6% | 33.9% |
| UCHL1         | 7345   | 41.1% | 30.4% | 30.1% | 33.9% |
| LAD1          | 3898   | 39.5% | 32.7% | 29.3% | 33.9% |
| CIP29         | 84324  | 46.7% | 22.9% | 32.0% | 33.9% |
| AIF1          | 199    | 42.5% | 27.4% | 31.7% | 33.9% |
| GPSM2         | 29899  | 40.1% | 28.9% | 32.6% | 33.9% |
| OR6Y1         | 391112 | 36.9% | 29.9% | 34.9% | 33.9% |
| LOC92906      | 92906  | 32.0% | 17.8% | 51.8% | 33.9% |
| FLJ12760      | 339175 | 37.6% | 26.7% | 37.3% | 33.9% |
| PPIA          | 5478   | 31.3% | 42.7% | 27.6% | 33.9% |
| UBE4A         | 9354   | 41.0% | 24.6% | 36.1% | 33.9% |
| DOCK11        | 139818 | 47.0% | 24.6% | 30.1% | 33.9% |
| VPS33B        | 26276  | 38.3% | 32.8% | 30.6% | 33.9% |
| ALDH3B1       | 221    | 36.2% | 32.7% | 32.9% | 33.9% |
| TBX5          | 6910   | 36.9% | 31.4% | 33.5% | 33.9% |
| TMEM16G       | 50636  | 52.4% | 26.3% | 23.1% | 33.9% |
| BTBD12        | 84464  | 55.0% | 21.9% | 24.9% | 33.9% |
| HERC4         | 26091  | 35.2% | 26.2% | 40.3% | 33.9% |
| HNRPUL2       | 221092 | 24.2% | 36.7% | 40.8% | 33.9% |
| ILK           | 3611   | 37.5% | 33.5% | 30.8% | 33.9% |
| OPTC          | 26254  | 35.5% | 25.5% | 40.8% | 33.9% |
| POLR3K        | 51728  | 42.3% | 24.8% | 34.7% | 33.9% |
| PXN           | 5829   | 44.7% | 36.3% | 20.9% | 33.9% |
| PCDH1         | 5097   | 38.2% | 26.1% | 37.5% | 33.9% |
| BIN2          | 51411  | 51.8% | 26.7% | 23.3% | 34.0% |
| ZNF217        | 7764   | 38.1% | 31.6% | 32.1% | 34.0% |
| CCL8          | 6355   | 40.0% | 21.9% | 40.0% | 34.0% |
| PCDHGA8       | 9708   | 45.3% | 28.6% | 28.0% | 34.0% |
| MARCO         | 8685   | 56.3% | 22.1% | 23.5% | 34.0% |
| TNFRSF25      | 8718   | 36.5% | 31.8% | 33.6% | 34.0% |
| MAP3K7IP2     | 23118  | 41.6% | 27.8% | 32.5% | 34.0% |
| MGC9712       | 202915 | 42.3% | 32.6% | 27.0% | 34.0% |
| LOC375759     | 375759 | 28.1% | 42.4% | 31.4% | 34.0% |
| TYROBP        | 7305   | 44.6% | 29.1% | 28.3% | 34.0% |
| ALDH1A1       | 216    | 44.4% | 32.5% | 25.1% | 34.0% |
| ZFX           | 7543   | 41.4% | 25.9% | 34.9% | 34.0% |
| OR6K2         | 81448  | 33.3% | 36.1% | 32.6% | 34.0% |
| TAF9L         | 51616  | 47.9% | 29.8% | 24.4% | 34.0% |
| IPO7          | 10527  | 32.0% | 36.7% | 33.3% | 34.0% |
| RALP          | 399694 | 29.3% | 32.9% | 39.9% | 34.0% |
| SCA7          | 6314   | 35.1% | 32.8% | 34.2% | 34.0% |
| MGC10871      | 83759  | 42.9% | 11.9% | 47.4% | 34.0% |
| PTH           | 5741   | 50.9% | 20.1% | 31.2% | 34.0% |
| CBX3          | 11335  | 46.6% | 26.3% | 29.3% | 34.1% |
| FLJ20309      | 54891  | 49.2% | 25.3% | 27.7% | 34.1% |
| NLGN4X        | 57502  | 44.2% | 25.9% | 32.1% | 34.1% |
| LOC646424     | 646424 | 28.3% | 25.9% | 48.1% | 34.1% |
| CRI1          | 23741  | 33.7% | 33.6% | 34.9% | 34.1% |
| ECHDC1        | 55862  | 39.4% | 26.3% | 36.6% | 34.1% |
| M6PR          | 4074   | 42.0% | 31.6% | 28.7% | 34.1% |
| OR6V1         | 346517 | 28.6% | 36.5% | 37.2% | 34.1% |
| NCB5OR        | 51167  | 41.7% | 46.5% | 14.1% | 34.1% |
| ROBO1         | 6091   | 43.6% | 22.8% | 35.9% | 34.1% |
| RFC5          | 5985   | 38.9% | 28.8% | 34.6% | 34.1% |
| TAS2R45       | 259291 | 28.4% | 41.6% | 32.4% | 34.1% |
| OR52E4        | 390081 | 40.7% | 26.9% | 34.7% | 34.1% |
| UCN2          | 90226  | 44.5% | 26.8% | 30.9% | 34.1% |
| ANAPC7        | 51434  | 43.7% | 32.4% | 26.3% | 34.1% |
| ARL6          | 84100  | 36.5% | 38.3% | 27.5% | 34.1% |
| HAGH          | 3029   | 42.3% | 25.9% | 34.2% | 34.1% |
| C9ORF140      | 89958  | 45.9% | 28.1% | 28.4% | 34.1% |
| MGC61571      | 152100 | 41.5% | 29.9% | 31.0% | 34.1% |
| RICTOR        | 253260 | 34.7% | 30.4% | 37.2% | 34.1% |
| \$AMHD1       | 25939  | 38.2% | 35.1% | 29.2% | 34.1% |
| ZNF397        | 84307  | 47.4% | 26.0% | 29.0% | 34.1% |
| CHMP1.5       | 57132  | 28.2% | 28.3% | 45.9% | 34.1% |
| U2AF1L3       | 199746 | 37.1% | 21.6% | 43.7% | 34.1% |
| ZNF226        | 7769   | 33.3% | 33.8% | 35.4% | 34.2% |
| SLC39A11      | 201266 | 32.4% | 33.6% | 36.4% | 34.2% |
| IRS4          | 8471   | 41.0% | 40.8% | 20.6% | 34.2% |
| RB1           | 5925   | 33.3% | 32.7% | 36.4% | 34.2% |
| LOC90485      | 90485  | 38.3% | 30.7% | 33.5% | 34.2% |
| ELAVL3        | 1995   | 37.7% | 28.6% | 36.2% | 34.2% |
| FLJ25477      | 219287 | 33.5% | 32.5% | 36.5% | 34.2% |
| UNQ9433       | 389658 | 42.0% | 28.6% | 31.9% | 34.2% |
| SVH           | 83787  | 38.0% | 31.5% | 33.0% | 34.2% |
| ZW10          | 9183   | 31.8% | 35.1% | 35.6% | 34.2% |
| DKFZP434N062  | 151313 | 33.9% | 35.3% | 33.3% | 34.2% |
| TMEM21A       | 146861 | 35.3% | 37.4% | 29.9% | 34.2% |
| TRAPP2        | 6399   | 31.3% | 35.4% | 35.9% | 34.2% |
| ORAOV1        | 220064 | 33.5% | 37.3% | 31.8% | 34.2% |
| LOC342132     | 342132 | 34.2% | 30.7% | 37.7% | 34.2% |
| KRTAP2-4      | 85294  | 11.1% | 57.7% | 33.8% | 34.2% |
| IARS          | 3376   | 37.3% | 34.2% | 31.2% | 34.2% |
| NEDD8         | 4738   | 46.5% | 24.4% | 31.7% | 34.2% |



|               |        |       |       |       |       |
|---------------|--------|-------|-------|-------|-------|
| SLRN          | 353281 | 35.9% | 33.2% | 33.5% | 34.2% |
| SPDEF         | 25803  | 32.2% | 34.2% | 36.3% | 34.2% |
| K-ALPHA-1     | 10376  | 31.3% | 14.3% | 57.1% | 34.2% |
| FXR1          | 8087   | 36.9% | 30.9% | 34.8% | 34.2% |
| INPP5E        | 56623  | 35.0% | 34.8% | 32.8% | 34.2% |
| TRIP11        | 9321   | 41.6% | 24.8% | 36.3% | 34.2% |
| KIF1A         | 547    | 51.4% | 21.7% | 29.6% | 34.2% |
| LRFN5         | 145581 | 36.9% | 32.3% | 33.5% | 34.2% |
| FUCA1         | 2517   | 42.7% | 31.8% | 28.3% | 34.2% |
| ESD           | 2098   | 40.9% | 28.4% | 33.4% | 34.3% |
| AIG1          | 51390  | 40.7% | 35.7% | 26.3% | 34.3% |
| CDKL4         | 344387 | 39.2% | 34.8% | 28.8% | 34.3% |
| ZDHHC6        | 64429  | 29.7% | 36.8% | 36.3% | 34.3% |
| RASSF4        | 83937  | 37.3% | 35.5% | 29.9% | 34.3% |
| MAPK11        | 5600   | 25.1% | 37.8% | 39.9% | 34.3% |
| KLHDC5        | 57542  | 30.0% | 36.7% | 36.1% | 34.3% |
| UGT1A3        | 54659  | 33.1% | 33.9% | 35.8% | 34.3% |
| HTR2C         | 3358   | 30.1% | 37.5% | 35.2% | 34.3% |
| CNTN4         | 152330 | 43.6% | 27.7% | 31.6% | 34.3% |
| SMC1L2        | 27127  | 51.8% | 22.1% | 29.0% | 34.3% |
| MLC1          | 23209  | 32.0% | 35.4% | 35.5% | 34.3% |
| LHPP          | 64077  | 43.0% | 39.8% | 20.1% | 34.3% |
| MXI1          | 4601   | 39.1% | 29.3% | 34.5% | 34.3% |
| RTP1          | 132112 | 28.1% | 39.3% | 35.5% | 34.3% |
| OR8D2         | 283160 | 40.4% | 28.1% | 34.5% | 34.3% |
| KIF3A         | 11127  | 44.7% | 34.8% | 23.4% | 34.3% |
| ZNF473        | 25888  | 38.0% | 31.5% | 33.4% | 34.3% |
| P4HB          | 5034   | 38.9% | 37.6% | 26.4% | 34.3% |
| PANX1         | 24145  | 31.0% | 32.1% | 39.8% | 34.3% |
| PSEN1         | 5663   | 30.2% | 36.1% | 36.7% | 34.3% |
| GPX1          | 2876   | 43.6% | 38.5% | 20.9% | 34.3% |
| RACGAP1       | 29127  | 29.4% | 39.5% | 34.1% | 34.3% |
| LCT           | 3938   | 47.0% | 32.2% | 23.8% | 34.3% |
| E2F1          | 1869   | 36.1% | 38.7% | 28.2% | 34.3% |
| C20ORF98      | 80023  | 38.4% | 36.8% | 27.8% | 34.3% |
| HIST1H2BI     | 8346   | 41.7% | 28.0% | 33.3% | 34.3% |
| ADAM29        | 11086  | 32.0% | 34.2% | 36.8% | 34.4% |
| LOC155006     | 155006 | 36.6% | 34.3% | 32.2% | 34.4% |
| PEC1          | 10455  | 49.1% | 21.7% | 32.3% | 34.4% |
| GALK1         | 2584   | 45.7% | 36.6% | 20.8% | 34.4% |
| BTBD2         | 55643  | 49.0% | 21.6% | 32.5% | 34.4% |
| FLJ14904      | 84944  | 42.8% | 32.6% | 27.7% | 34.4% |
| MGC2603       | 79000  | 39.6% | 29.5% | 34.0% | 34.4% |
| OR2A5         | 393046 | 37.6% | 38.7% | 26.9% | 34.4% |
| LMO4          | 8543   | 44.2% | 26.8% | 32.1% | 34.4% |
| SPIN1         | 83985  | 29.3% | 38.2% | 35.7% | 34.4% |
| C10orf130     | 387707 | 43.0% | 29.4% | 30.7% | 34.4% |
| C10ORF7       | 8872   | 41.8% | 25.6% | 35.8% | 34.4% |
| KIR2DL5       | 57292  | 40.0% | 27.5% | 35.7% | 34.4% |
| FLJ25348      | 90853  | 30.8% | 40.5% | 31.9% | 34.4% |
| FOLR3         | 2352   | 53.8% | 28.0% | 21.4% | 34.4% |
| C4ORF7        | 260436 | 41.3% | 24.1% | 37.8% | 34.4% |
| KLHDC3        | 116138 | 38.9% | 30.3% | 34.1% | 34.4% |
| ZNF569        | 148266 | 36.2% | 34.5% | 32.6% | 34.4% |
| HHL           | 9910   | 35.0% | 29.6% | 38.6% | 34.4% |
| RNPS1         | 10921  | 43.7% | 37.1% | 22.4% | 34.4% |
| FLJ10916      | 55258  | 45.4% | 24.9% | 32.9% | 34.4% |
| MGC2198       | 192286 | 34.4% | 38.2% | 30.6% | 34.4% |
| DKFZP586C1924 | 84233  | 36.1% | 39.2% | 28.0% | 34.4% |
| BFSP2         | 8419   | 42.9% | 29.1% | 31.4% | 34.4% |
| PNN           | 5411   | 32.1% | 36.8% | 34.3% | 34.4% |
| C9ORF86       | 55684  | 35.7% | 37.7% | 29.9% | 34.4% |
| HFE2          | 148738 | 46.7% | 21.8% | 34.9% | 34.5% |
| USP54         | 159195 | 25.5% | 37.6% | 40.3% | 34.5% |
| MYH14         | 79784  | 53.4% | 21.6% | 28.4% | 34.5% |
| MARCH9        | 92979  | 34.8% | 28.4% | 40.2% | 34.5% |
| SPIC          | 121599 | 48.1% | 32.3% | 23.0% | 34.5% |
| TTC5          | 91875  | 40.5% | 35.4% | 27.6% | 34.5% |
| E2F6          | 1876   | 32.6% | 36.3% | 34.6% | 34.5% |
| SPRR1B        | 6699   | 35.1% | 31.4% | 37.0% | 34.5% |
| NCL           | 4691   | 38.9% | 28.6% | 36.0% | 34.5% |
| PABPN1        | 8106   | 38.7% | 33.6% | 31.2% | 34.5% |
| OR1A2         | 26189  | 39.4% | 34.3% | 29.8% | 34.5% |
| MUC7          | 4589   | 31.9% | 39.4% | 32.3% | 34.5% |
| KIR2DL4       | 3805   | 52.6% | 28.8% | 22.2% | 34.5% |
| ATIC          | 471    | 32.3% | 40.6% | 30.7% | 34.6% |
| OSGEP1L1      | 64172  | 39.2% | 37.7% | 26.7% | 34.6% |
| CKAP2         | 26586  | 50.6% | 22.0% | 31.1% | 34.6% |
| OR1J2         | 26740  | 31.5% | 37.7% | 34.5% | 34.6% |
| KIRREL2       | 84063  | 31.4% | 45.5% | 26.8% | 34.6% |
| ZNF322A       | 79692  | 39.7% | 33.9% | 30.0% | 34.6% |
| ZNF76         | 7629   | 33.3% | 12.5% | 57.9% | 34.6% |
| PCDH11X       | 27328  | 32.6% | 35.2% | 35.9% | 34.6% |
| RPL15         | 6138   | 36.3% | 30.5% | 37.0% | 34.6% |
| MGC26733      | 200403 | 37.1% | 29.6% | 37.0% | 34.6% |
| MYO18A        | 399687 | 46.5% | 28.8% | 28.4% | 34.6% |
| CRYBA1        | 1411   | 40.3% | 38.7% | 24.7% | 34.6% |
| ALPL          | 249    | 34.0% | 32.7% | 37.1% | 34.6% |
| FLJ12716      | 60684  | 44.1% | 22.8% | 36.9% | 34.6% |
| SDC2          | 6383   | 49.2% | 35.9% | 18.7% | 34.6% |
| FLJ20294      | 55626  | 36.0% | 34.9% | 32.9% | 34.6% |
| ZNF367        | 195828 | 53.8% | 20.9% | 29.0% | 34.6% |
| FLJ22184      | 80164  | 52.2% | 32.7% | 18.9% | 34.6% |
| WIF1          | 11197  | 43.2% | 33.3% | 27.3% | 34.6% |
| FLJ32800      | 196951 | 32.0% | 32.6% | 39.3% | 34.6% |
| REPRIMO       | 56475  | 49.3% | 23.6% | 31.0% | 34.6% |
| NKX3-1        | 4824   | 46.2% | 36.3% | 21.4% | 34.6% |
| DCBLD1        | 285761 | 38.3% | 24.4% | 41.1% | 34.6% |

|               |        |       |       |       |       |
|---------------|--------|-------|-------|-------|-------|
| FLJ20508      | 54955  | 26.9% | 37.7% | 39.3% | 34.6% |
| ATP6AP2       | 10159  | 34.6% | 31.0% | 38.4% | 34.6% |
| TLR3          | 7098   | 34.9% | 29.5% | 39.6% | 34.6% |
| RBJ           | 51277  | 35.9% | 37.3% | 30.7% | 34.6% |
| LOC651503     | 651503 | 42.9% | 36.5% | 24.6% | 34.6% |
| ZNF616        | 90317  | 46.4% | 22.5% | 35.1% | 34.6% |
| RSHL1         | 81492  | 55.6% | 30.2% | 18.3% | 34.7% |
| ACADSB        | 36     | 42.5% | 19.3% | 42.2% | 34.7% |
| C18ORF25      | 147339 | 41.0% | 28.3% | 34.7% | 34.7% |
| ADAMTS17      | 170691 | 37.0% | 29.3% | 37.7% | 34.7% |
| FOXA3         | 3171   | 51.6% | 19.8% | 32.6% | 34.7% |
| PCBP1         | 5093   | 46.1% | 35.5% | 22.4% | 34.7% |
| IVNS1ABP      | 10625  | 45.0% | 25.4% | 33.7% | 34.7% |
| SECTM1        | 6398   | 29.3% | 33.3% | 41.4% | 34.7% |
| FLJ38281      | 163051 | 35.1% | 36.4% | 32.6% | 34.7% |
| MGC42367      | 343990 | 41.7% | 20.3% | 42.1% | 34.7% |
| SLC6A2        | 6530   | 32.2% | 37.0% | 34.9% | 34.7% |
| BXDC2         | 55299  | 31.6% | 39.4% | 33.1% | 34.7% |
| FLJ11000      | 55281  | 41.2% | 30.5% | 32.4% | 34.7% |
| PRPSAP1       | 5635   | 35.3% | 38.9% | 30.0% | 34.7% |
| REL           | 5966   | 29.3% | 41.1% | 33.7% | 34.7% |
| MGC50844      | 340348 | 24.0% | 43.1% | 37.0% | 34.7% |
| RNASEN        | 29102  | 45.4% | 33.3% | 25.4% | 34.7% |
| LGR7          | 59350  | 42.3% | 38.4% | 23.5% | 34.7% |
| LOC348158     | 348158 | 44.0% | 26.1% | 34.2% | 34.7% |
| MRPL22        | 29093  | 50.5% | 16.6% | 37.2% | 34.8% |
| LOC92345      | 92345  | 51.7% | 30.3% | 22.3% | 34.8% |
| FOXO1A        | 2308   | 34.1% | 29.8% | 40.4% | 34.8% |
| KNTC1         | 9735   | 50.0% | 33.3% | 20.9% | 34.8% |
| C17ORF39      | 79018  | 35.2% | 36.8% | 32.3% | 34.8% |
| CXORF9        | 54440  | 40.2% | 36.3% | 27.8% | 34.8% |
| UCN           | 7349   | 42.1% | 27.4% | 34.8% | 34.8% |
| CD48          | 962    | 35.3% | 36.0% | 33.1% | 34.8% |
| IPO4          | 79711  | 26.9% | 27.4% | 50.0% | 34.8% |
| ITGB5         | 3693   | 34.5% | 37.0% | 32.9% | 34.8% |
| FLJ10211      | 55095  | 19.6% | 40.2% | 44.6% | 34.8% |
| MGC2654       | 79091  | 28.8% | 33.3% | 42.3% | 34.8% |
| ZMYM3         | 9203   | 45.4% | 32.1% | 26.9% | 34.8% |
| GIPC3         | 126326 | 33.8% | 43.9% | 26.7% | 34.8% |
| ITM2A         | 9452   | 33.9% | 37.0% | 33.6% | 34.8% |
| CLPTM1        | 1209   | 42.2% | 26.5% | 35.8% | 34.8% |
| TBCD          | 6904   | 42.1% | 42.6% | 19.8% | 34.8% |
| NLN           | 57486  | 46.4% | 28.7% | 29.3% | 34.8% |
| FBXO23        | 26262  | 23.3% | 30.5% | 50.7% | 34.8% |
| METAP2        | 10988  | 49.9% | 26.7% | 28.0% | 34.8% |
| MGC3200       | 84265  | 38.0% | 22.2% | 44.3% | 34.8% |
| MAX           | 4149   | 33.3% | 33.6% | 37.6% | 34.8% |
| FBN2          | 2201   | 32.4% | 33.4% | 38.7% | 34.9% |
| FLJ21438      | 64926  | 42.6% | 26.7% | 35.3% | 34.9% |
| HSP90B1       | 7184   | 28.6% | 37.7% | 38.4% | 34.9% |
| HTLF          | 3344   | 36.2% | 36.3% | 32.2% | 34.9% |
| LOC388335     | 388335 | 44.0% | 36.8% | 23.9% | 34.9% |
| SEC61A1       | 29927  | 38.5% | 25.0% | 41.2% | 34.9% |
| ZBTB3         | 79842  | 38.1% | 27.3% | 39.3% | 34.9% |
| TTL4          | 9654   | 41.7% | 32.4% | 30.6% | 34.9% |
| INPP5B        | 3633   | 39.7% | 37.0% | 28.0% | 34.9% |
| LOC402055     | 402055 | 29.3% | 39.2% | 36.2% | 34.9% |
| ASB9          | 140462 | 46.6% | 26.7% | 31.5% | 34.9% |
| LOC338661     | 338661 | 39.8% | 28.2% | 36.8% | 34.9% |
| KIAA1641      | 57730  | 45.9% | 30.6% | 28.3% | 34.9% |
| GBF2          | 2634   | 41.0% | 30.4% | 33.4% | 34.9% |
| FLJ14775      | 84923  | 33.9% | 34.7% | 36.2% | 34.9% |
| MT1H          | 4496   | 34.3% | 34.4% | 36.2% | 34.9% |
| ALS2CR15      | 130026 | 24.1% | 33.5% | 47.3% | 34.9% |
| DKFZP564N2472 | 285877 | 38.9% | 33.8% | 32.1% | 35.0% |
| FLJ30473      | 150209 | 54.9% | 22.7% | 27.3% | 35.0% |
| TCF8          | 6935   | 37.3% | 30.8% | 36.8% | 35.0% |
| PSMB9         | 5698   | 42.0% | 27.7% | 35.3% | 35.0% |
| UACA          | 55075  | 41.6% | 30.0% | 33.3% | 35.0% |
| KLHDC1        | 122773 | 40.8% | 34.0% | 30.2% | 35.0% |
| CLDN7         | 1366   | 38.2% | 38.6% | 28.2% | 35.0% |
| UNC119        | 9094   | 40.7% | 39.0% | 25.4% | 35.0% |
| C12ORF4       | 57102  | 45.9% | 34.0% | 25.2% | 35.0% |
| APOBEC2       | 10930  | 47.7% | 31.8% | 25.6% | 35.0% |
| NECAP2        | 55707  | 38.6% | 38.2% | 28.3% | 35.0% |
| BVES          | 11149  | 44.8% | 28.5% | 31.7% | 35.0% |
| FLJ33387      | 161145 | 30.7% | 32.2% | 42.2% | 35.0% |
| TCTA          | 6988   | 51.4% | 37.1% | 16.7% | 35.0% |
| IRAK1BP1      | 134728 | 37.5% | 31.3% | 36.4% | 35.1% |
| ZNF517        | 340385 | 38.1% | 42.9% | 24.2% | 35.1% |
| RP2           | 6102   | 41.5% | 31.5% | 32.2% | 35.1% |
| RNF150        | 57484  | 35.8% | 38.0% | 31.5% | 35.1% |
| HS6ST1        | 9394   | 29.0% | 42.0% | 34.3% | 35.1% |
| MS4A13        | 503497 | 45.0% | 33.8% | 26.5% | 35.1% |
| CANT1         | 124583 | 42.9% | 29.1% | 33.3% | 35.1% |
| GAR17         | 246176 | 39.7% | 29.3% | 36.3% | 35.1% |
| GDF2          | 2658   | 36.4% | 30.8% | 38.0% | 35.1% |
| SLCO2A1       | 6578   | 39.2% | 36.2% | 29.9% | 35.1% |
| SPHK2         | 56848  | 19.3% | 40.2% | 45.8% | 35.1% |
| MAP3K12       | 7786   | 40.2% | 29.8% | 35.3% | 35.1% |
| LOC112869     | 112869 | 30.6% | 37.5% | 37.3% | 35.1% |
| TMEM38A       | 79041  | 48.0% | 27.1% | 30.2% | 35.1% |
| HINMT         | 3176   | 43.5% | 34.3% | 27.6% | 35.1% |
| RASGRP3       | 25780  | 43.2% | 28.7% | 33.5% | 35.1% |
| SIAT1         | 6480   | 40.6% | 30.7% | 34.0% | 35.1% |
| SALL4         | 57167  | 42.0% | 34.1% | 29.4% | 35.1% |
| PRKAB2        | 5565   | 23.7% | 34.0% | 47.7% | 35.2% |
| BTK           | 695    | 35.7% | 37.1% | 32.6% | 35.2% |

|           |        |       |       |       |       |
|-----------|--------|-------|-------|-------|-------|
| RIPX      | 22902  | 35.9% | 26.1% | 43.5% | 35.2% |
| SLC16A6   | 9120   | 44.6% | 31.8% | 29.0% | 35.2% |
| C14ORF153 | 84334  | 31.8% | 31.5% | 42.2% | 35.2% |
| KCNT2     | 343450 | 41.4% | 28.1% | 35.9% | 35.2% |
| MYOG      | 4656   | 36.4% | 22.4% | 46.7% | 35.2% |
| FLJ16793  | 645121 | 40.9% | 31.8% | 32.8% | 35.2% |
| UBD       | 10537  | 30.6% | 37.6% | 37.4% | 35.2% |
| ADSS      | 159    | 44.6% | 32.9% | 28.1% | 35.2% |
| GRAMD2    | 196996 | 39.8% | 35.9% | 29.9% | 35.2% |
| MMD2      | 221938 | 53.2% | 24.1% | 28.3% | 35.2% |
| C1ORF40   | 149345 | 32.1% | 32.1% | 41.4% | 35.2% |
| KCNJ16    | 3773   | 50.0% | 28.0% | 27.6% | 35.2% |
| TYRP1     | 7306   | 32.2% | 33.8% | 39.6% | 35.2% |
| NUMB      | 8650   | 36.4% | 34.3% | 35.0% | 35.2% |
| COL4A6    | 1288   | 45.1% | 27.0% | 33.6% | 35.2% |
| ORS2B4    | 143496 | 54.1% | 25.5% | 26.1% | 35.2% |
| MGC14161  | 84978  | 33.8% | 34.0% | 37.9% | 35.2% |
| ORS5F1    | 127066 | 36.2% | 37.5% | 32.1% | 35.2% |
| MLANA     | 2315   | 50.0% | 33.3% | 22.4% | 35.2% |
| LOC201181 | 201181 | 38.7% | 27.0% | 40.0% | 35.2% |
| RSU1      | 6251   | 45.1% | 24.0% | 36.7% | 35.2% |
| MGC33212  | 255758 | 51.6% | 27.3% | 26.9% | 35.3% |
| PRKACB    | 5567   | 40.2% | 31.3% | 34.3% | 35.3% |
| NEDD9     | 4739   | 33.3% | 36.3% | 36.2% | 35.3% |
| PWP2H     | 5822   | 30.0% | 33.3% | 42.5% | 35.3% |
| PPP5C     | 5536   | 38.1% | 40.3% | 27.5% | 35.3% |
| KCNS1     | 3787   | 34.2% | 41.7% | 30.0% | 35.3% |
| OR2W3     | 343171 | 46.4% | 29.9% | 29.7% | 35.3% |
| EMILIN2   | 84034  | 39.8% | 36.0% | 30.2% | 35.3% |
| ZMYM1     | 79830  | 35.6% | 32.7% | 37.7% | 35.3% |
| ZNF555    | 148254 | 37.6% | 31.7% | 36.7% | 35.3% |
| SREBF2    | 6721   | 38.2% | 32.2% | 35.6% | 35.3% |
| ITIH5L    | 347365 | 41.0% | 37.3% | 27.7% | 35.3% |
| DOCK6     | 57572  | 38.8% | 34.2% | 33.0% | 35.3% |
| RUFY2     | 55680  | 43.0% | 35.4% | 27.7% | 35.3% |
| LRIG1     | 26018  | 44.1% | 27.7% | 34.2% | 35.3% |
| CNDP2     | 55748  | 36.4% | 46.9% | 22.8% | 35.4% |
| LPP       | 4026   | 41.7% | 42.5% | 21.9% | 35.4% |
| DCTN2     | 10540  | 43.2% | 29.8% | 33.1% | 35.4% |
| HLXB9     | 3110   | 47.3% | 27.8% | 31.0% | 35.4% |
| BRDG1     | 26228  | 33.7% | 40.2% | 32.2% | 35.4% |
| CD83      | 9308   | 34.6% | 37.9% | 33.6% | 35.4% |
| LPGAT1    | 9926   | 36.7% | 26.1% | 43.3% | 35.4% |
| GLP1R     | 2740   | 40.9% | 32.5% | 32.8% | 35.4% |
| ATP6V1E2  | 90423  | 39.6% | 35.0% | 31.5% | 35.4% |
| TTLL3     | 26140  | 37.3% | 36.9% | 31.9% | 35.4% |
| PPIL6     | 285755 | 48.7% | 26.2% | 31.3% | 35.4% |
| GLUL      | 2752   | 34.2% | 32.1% | 39.9% | 35.4% |
| RHEBL1    | 121268 | 38.2% | 33.9% | 34.1% | 35.4% |
| CDS9      | 966    | 39.9% | 32.9% | 33.4% | 35.4% |
| NICE-3    | 25912  | 22.6% | 39.9% | 43.8% | 35.4% |
| NDN       | 4692   | 45.1% | 30.0% | 31.2% | 35.4% |
| BIVM      | 54841  | 49.2% | 26.4% | 30.6% | 35.4% |
| TSPAN6    | 7105   | 28.1% | 38.1% | 40.0% | 35.4% |
| LETM2     | 137994 | 47.4% | 26.3% | 32.6% | 35.4% |
| TYR       | 7299   | 37.4% | 34.5% | 34.4% | 35.4% |
| SPG20     | 23111  | 35.8% | 28.1% | 42.4% | 35.4% |
| SYNCRIP   | 10492  | 43.6% | 27.6% | 35.1% | 35.4% |
| ESPL1     | 9700   | 30.6% | 42.4% | 33.3% | 35.4% |
| TAF11     | 6882   | 44.4% | 28.6% | 33.3% | 35.4% |
| ECG2      | 84651  | 33.3% | 27.5% | 45.5% | 35.5% |
| PSKH2     | 85481  | 38.6% | 37.5% | 30.3% | 35.5% |
| GUCY2C    | 2984   | 42.8% | 35.0% | 28.6% | 35.5% |
| CDC42EP5  | 148170 | 48.7% | 25.8% | 32.0% | 35.5% |
| C14ORF43  | 91748  | 40.0% | 29.1% | 37.3% | 35.5% |
| ECE2      | 9718   | 42.7% | 33.6% | 30.1% | 35.5% |
| ADD2      | 119    | 41.4% | 28.8% | 36.2% | 35.5% |
| FLJ35709  | 283294 | 34.9% | 34.2% | 37.4% | 35.5% |
| GPR97     | 222487 | 45.3% | 31.3% | 29.8% | 35.5% |
| RAB8A     | 4218   | 43.3% | 32.2% | 31.0% | 35.5% |
| LOC116236 | 116236 | 47.1% | 23.5% | 35.9% | 35.5% |
| KLHL14    | 57565  | 35.8% | 43.3% | 27.4% | 35.5% |
| CPA5      | 93979  | 55.4% | 29.9% | 21.3% | 35.5% |
| LAMA4     | 3910   | 32.4% | 38.3% | 35.8% | 35.5% |
| PFKFB4    | 5210   | 41.8% | 31.8% | 32.9% | 35.5% |
| SLC10A5   | 347051 | 41.7% | 32.1% | 32.9% | 35.6% |
| SAP130    | 79595  | 47.5% | 30.3% | 28.8% | 35.6% |
| ARMCX3    | 51566  | 44.1% | 35.6% | 27.1% | 35.6% |
| LHX6      | 26468  | 37.1% | 38.8% | 30.9% | 35.6% |
| LOC153770 | 153770 | 32.6% | 34.5% | 39.7% | 35.6% |
| RAD51C    | 5889   | 34.1% | 37.9% | 34.8% | 35.6% |
| OR2V2     | 285659 | 42.4% | 28.3% | 36.1% | 35.6% |
| KCNAB2    | 8514   | 38.4% | 39.0% | 29.4% | 35.6% |
| ORS2H1    | 390067 | 44.3% | 28.2% | 34.3% | 35.6% |
| ZNF581    | 51545  | 45.1% | 37.2% | 24.6% | 35.6% |
| KIAA1164  | 54629  | 29.7% | 35.5% | 41.8% | 35.6% |
| HSD11B1   | 3290   | 45.7% | 23.1% | 38.1% | 35.6% |
| LOC552889 | 552889 | 41.3% | 32.4% | 33.3% | 35.7% |
| CLDN5     | 7122   | 36.3% | 36.5% | 34.2% | 35.7% |
| EPB41L5   | 57669  | 43.8% | 36.3% | 26.9% | 35.7% |
| CPN1      | 1369   | 39.9% | 38.0% | 29.2% | 35.7% |
| C6ORF211  | 79624  | 41.7% | 34.2% | 31.2% | 35.7% |
| SLA2      | 84174  | 46.9% | 23.0% | 37.1% | 35.7% |
| PROCA1    | 147011 | 52.3% | 30.9% | 23.9% | 35.7% |
| FGD4      | 121512 | 37.2% | 30.2% | 39.7% | 35.7% |
| TAS2R48   | 259294 | 34.8% | 35.4% | 36.9% | 35.7% |
| C14ORF11  | 55837  | 35.3% | 38.9% | 33.0% | 35.7% |
| HIST1H1C  | 3006   | 61.8% | 17.9% | 27.4% | 35.7% |

|               |           |       |       |       |       |
|---------------|-----------|-------|-------|-------|-------|
| C10ORF117     | 64318     | 37.5% | 36.8% | 32.9% | 35.7% |
| ALDH7A1       | 501       | 40.0% | 33.3% | 33.8% | 35.7% |
| KDEL1         | 79070     | 47.2% | 27.3% | 32.7% | 35.7% |
| LOC100134934  | 100134934 | 42.3% | 25.9% | 39.0% | 35.7% |
| AD031         | 83935     | 35.5% | 23.8% | 47.9% | 35.7% |
| C6ORF118      | 168090    | 41.9% | 35.2% | 30.1% | 35.8% |
| CYP4F2        | 8529      | 31.8% | 32.8% | 42.6% | 35.8% |
| LOC727830     | 727830    | 33.1% | 30.4% | 43.8% | 35.8% |
| OR9Q1         | 219956    | 23.1% | 42.0% | 42.2% | 35.8% |
| EGR3          | 1960      | 42.6% | 32.8% | 32.0% | 35.8% |
| CLEC4F        | 165530    | 49.6% | 24.8% | 32.9% | 35.8% |
| BSPRY         | 54836     | 31.2% | 34.2% | 42.0% | 35.8% |
| LOC148213     | 148213    | 33.8% | 40.5% | 33.1% | 35.8% |
| FLJ20811      | 54470     | 33.3% | 38.6% | 35.4% | 35.8% |
| PYGM          | 5837      | 39.6% | 31.2% | 36.6% | 35.8% |
| MGC4093       | 80776     | 43.9% | 24.6% | 39.0% | 35.8% |
| POSTN         | 10631     | 34.0% | 35.9% | 37.6% | 35.8% |
| DKFZP434G1415 | 83448     | 46.9% | 21.7% | 38.9% | 35.8% |
| CTNND1        | 1500      | 45.7% | 33.6% | 28.3% | 35.9% |
| LRRTM4        | 80059     | 28.0% | 29.0% | 50.6% | 35.9% |
| ANGPTL2       | 23452     | 49.4% | 29.5% | 28.7% | 35.9% |
| C14ORF29      | 145447    | 53.8% | 30.0% | 23.8% | 35.9% |
| CLN2          | 1200      | 31.1% | 41.4% | 35.2% | 35.9% |
| APOL1         | 8542      | 30.1% | 44.7% | 32.8% | 35.9% |
| LIN7C         | 55327     | 48.0% | 32.2% | 27.6% | 35.9% |
| MNS1          | 55329     | 38.6% | 39.4% | 29.8% | 35.9% |
| ORS2B6        | 340980    | 41.5% | 25.9% | 40.4% | 35.9% |
| C6            | 729       | 41.1% | 37.3% | 29.4% | 35.9% |
| CCRK          | 23552     | 38.8% | 31.7% | 37.3% | 35.9% |
| ZNF124        | 7678      | 35.6% | 33.8% | 38.3% | 35.9% |
| MUSK          | 4593      | 34.0% | 39.0% | 34.8% | 35.9% |
| ZNF674        | 641339    | 43.0% | 33.0% | 31.8% | 35.9% |
| CSTF3         | 1479      | 37.3% | 36.1% | 34.4% | 35.9% |
| BSG           | 682       | 39.0% | 39.0% | 29.8% | 35.9% |
| OR2A14        | 135941    | 64.3% | 20.0% | 23.5% | 35.9% |
| COL4A3BP      | 10087     | 36.8% | 36.7% | 34.4% | 35.9% |
| CD164         | 8763      | 43.3% | 27.4% | 37.1% | 35.9% |
| STRN          | 6801      | 48.8% | 30.2% | 28.9% | 36.0% |
| ACF           | 29974     | 35.7% | 31.3% | 41.0% | 36.0% |
| NFKB1         | 4790      | 50.7% | 21.8% | 35.5% | 36.0% |
| KRTAP19-4     | 337971    | 53.5% | 21.6% | 32.9% | 36.0% |
| MAD           | 4084      | 35.4% | 42.2% | 30.5% | 36.0% |
| WDR6          | 11180     | 45.1% | 35.3% | 27.6% | 36.0% |
| CD81          | 975       | 40.3% | 31.8% | 36.0% | 36.0% |
| DIRAS2        | 54769     | 42.9% | 39.7% | 25.5% | 36.0% |
| CSORF15       | 56951     | 33.0% | 36.0% | 39.1% | 36.0% |
| FRAT2         | 23401     | 42.7% | 34.1% | 31.4% | 36.1% |
| ALPP          | 250       | 27.1% | 42.3% | 38.9% | 36.1% |
| FRK           | 2444      | 33.7% | 35.2% | 39.4% | 36.1% |
| LOC152138     | 152138    | 49.1% | 27.0% | 32.2% | 36.1% |
| FLJ20628      | 55006     | 50.7% | 22.7% | 34.9% | 36.1% |
| ZNF605        | 90462     | 43.5% | 29.2% | 35.6% | 36.1% |
| MNDA          | 4332      | 36.2% | 42.4% | 29.8% | 36.1% |
| ZFH1B         | 9839      | 44.3% | 22.4% | 41.6% | 36.1% |
| CPLX4         | 339302    | 37.3% | 35.0% | 36.0% | 36.1% |
| TARBP2        | 6895      | 34.8% | 35.4% | 38.2% | 36.1% |
| HIST1H2BD     | 3017      | 40.8% | 25.9% | 41.6% | 36.1% |
| HIST1H2AM     | 8336      | 43.9% | 35.2% | 29.3% | 36.1% |
| ZNF454        | 285676    | 26.8% | 41.5% | 40.1% | 36.1% |
| TARSL2        | 123283    | 39.9% | 34.5% | 34.1% | 36.1% |
| B1            | 27241     | 49.4% | 24.1% | 35.0% | 36.2% |
| PTP4A1        | 7803      | 40.5% | 42.8% | 25.2% | 36.2% |
| SEPHS1        | 22929     | 46.2% | 28.3% | 34.1% | 36.2% |
| MGC23909      | 153339    | 28.5% | 35.2% | 44.8% | 36.2% |
| MUM1          | 84939     | 50.8% | 30.1% | 27.7% | 36.2% |
| RAP1A         | 5906      | 50.0% | 22.3% | 36.4% | 36.2% |
| PGD           | 5226      | 43.2% | 30.6% | 35.0% | 36.2% |
| TOR2A         | 27433     | 45.5% | 35.5% | 27.7% | 36.2% |
| HGS           | 9146      | 33.3% | 37.5% | 37.9% | 36.3% |
| FLJ11193      | 55322     | 36.4% | 41.7% | 30.8% | 36.3% |
| FLJ36268      | 401563    | 34.9% | 40.0% | 34.0% | 36.3% |
| DACH2         | 117154    | 42.7% | 31.9% | 34.2% | 36.3% |
| TAF1B         | 9014      | 45.0% | 29.6% | 34.3% | 36.3% |
| OSBP19        | 114883    | 57.1% | 30.4% | 21.3% | 36.3% |
| LOC388272     | 388272    | 47.5% | 30.3% | 31.1% | 36.3% |
| DATF1         | 11083     | 34.0% | 27.1% | 47.8% | 36.3% |
| SUPT16H       | 11198     | 32.3% | 41.0% | 35.7% | 36.3% |
| ZNF225        | 7768      | 36.4% | 40.9% | 31.7% | 36.3% |
| NAALAD1       | 10004     | 38.4% | 36.5% | 34.1% | 36.3% |
| PJA2          | 9867      | 43.2% | 28.3% | 37.5% | 36.3% |
| RP11-257K9.7  | 100129128 | 38.8% | 34.7% | 35.6% | 36.3% |
| ARF5          | 381       | 34.0% | 41.9% | 33.1% | 36.3% |
| CCNT1         | 904       | 47.1% | 41.1% | 20.8% | 36.3% |
| C6ORF204      | 387119    | 39.8% | 26.1% | 43.1% | 36.4% |
| LOC283219     | 283219    | 30.8% | 41.3% | 37.0% | 36.4% |
| CEACAM5       | 1048      | 55.5% | 31.2% | 22.4% | 36.4% |
| C7ORF16       | 10842     | 40.6% | 43.0% | 25.5% | 36.4% |
| CBWD6         | 644019    | 55.6% | 27.7% | 25.9% | 36.4% |
| LOC374955     | 374955    | 38.3% | 38.5% | 32.4% | 36.4% |
| MTIF2         | 4528      | 49.5% | 29.3% | 30.4% | 36.4% |
| CRISPLD1      | 83690     | 55.3% | 26.9% | 27.0% | 36.4% |
| MGC42493      | 339500    | 15.8% | 56.3% | 37.1% | 36.4% |
| C14ORF93      | 60686     | 40.4% | 36.1% | 32.7% | 36.4% |
| IGSF2         | 9398      | 37.6% | 36.7% | 34.9% | 36.4% |
| TAC1          | 6863      | 45.2% | 36.2% | 27.8% | 36.4% |
| CHC1          | 1104      | 36.6% | 23.4% | 49.2% | 36.4% |
| CHCHD5        | 84269     | 49.4% | 26.1% | 33.9% | 36.4% |
| CSPG6         | 9126      | 23.9% | 41.5% | 43.9% | 36.4% |

|              |        |       |       |       |       |
|--------------|--------|-------|-------|-------|-------|
| MGC33867     | 90231  | 38.9% | 34.1% | 36.4% | 36.4% |
| LOC401335    | 401335 | 36.5% | 41.2% | 31.6% | 36.4% |
| PRO1855      | 55379  | 25.9% | 42.6% | 40.8% | 36.5% |
| C18ORF8      | 29919  | 53.1% | 24.8% | 31.5% | 36.5% |
| PSME2        | 5721   | 42.9% | 30.3% | 36.2% | 36.5% |
| LCE2B        | 26239  | 45.8% | 27.5% | 36.1% | 36.5% |
| MYOZ1        | 58529  | 46.7% | 29.6% | 33.1% | 36.5% |
| QTRTD1       | 79691  | 41.6% | 32.8% | 35.2% | 36.5% |
| HSD17B4      | 3295   | 45.9% | 33.0% | 30.6% | 36.5% |
| SH3RF2       | 153769 | 40.6% | 26.7% | 42.3% | 36.5% |
| COL6A2       | 1292   | 33.8% | 43.3% | 32.5% | 36.5% |
| PCIA1        | 79016  | 27.8% | 32.9% | 48.9% | 36.5% |
| ZNF441       | 126068 | 29.5% | 43.8% | 36.4% | 36.5% |
| TP53I11      | 9537   | 46.5% | 32.8% | 30.3% | 36.6% |
| SCAP         | 22937  | 36.7% | 32.8% | 40.2% | 36.6% |
| TAP2         | 6891   | 28.7% | 44.6% | 36.5% | 36.6% |
| C19ORF7      | 23211  | 30.0% | 27.6% | 52.2% | 36.6% |
| TAFAS        | 25817  | 34.3% | 25.9% | 49.5% | 36.6% |
| ANKRD5       | 63926  | 43.4% | 33.5% | 32.9% | 36.6% |
| LOC51255     | 51255  | 51.9% | 28.6% | 29.3% | 36.6% |
| MPP3         | 4356   | 35.2% | 42.9% | 31.8% | 36.6% |
| ACY1L2       | 135293 | 42.5% | 31.0% | 36.3% | 36.6% |
| FLJ36766     | 348487 | 16.3% | 34.8% | 58.8% | 36.6% |
| NDUFA11      | 126328 | 33.5% | 45.2% | 31.3% | 36.6% |
| SOSTDC1      | 25928  | 40.0% | 45.8% | 24.1% | 36.6% |
| MIS12        | 79003  | 39.3% | 41.7% | 29.0% | 36.6% |
| NIT1         | 4817   | 55.6% | 25.0% | 29.4% | 36.7% |
| FLJ37549     | 163115 | 28.4% | 45.1% | 36.5% | 36.7% |
| ATR          | 545    | 36.2% | 38.3% | 35.5% | 36.7% |
| ATP8A1       | 10396  | 46.0% | 28.8% | 35.2% | 36.7% |
| MYF6         | 4618   | 51.1% | 30.3% | 28.6% | 36.7% |
| FSTL1        | 11167  | 47.8% | 32.7% | 29.5% | 36.7% |
| HSF2         | 3298   | 40.6% | 31.5% | 38.0% | 36.7% |
| C6ORF10      | 10665  | 36.5% | 38.8% | 34.7% | 36.7% |
| ZNF211       | 10520  | 41.6% | 31.9% | 36.5% | 36.7% |
| UTY          | 7404   | 52.2% | 21.9% | 35.9% | 36.7% |
| TNFAIP6      | 7130   | 44.2% | 33.1% | 32.8% | 36.7% |
| UCHL5        | 51377  | 41.1% | 39.9% | 29.1% | 36.7% |
| SLC3A2       | 6520   | 45.1% | 31.7% | 33.3% | 36.7% |
| OMD          | 4958   | 47.9% | 28.7% | 33.6% | 36.7% |
| TMEM14A      | 28978  | 42.9% | 36.3% | 31.1% | 36.7% |
| PTDO12       | 28970  | 43.3% | 31.9% | 35.1% | 36.7% |
| TNT          | 162083 | 41.2% | 28.5% | 40.7% | 36.8% |
| SYTL2        | 54843  | 43.1% | 38.0% | 29.3% | 36.8% |
| MAP6         | 4135   | 38.3% | 44.0% | 28.2% | 36.8% |
| SMN1         | 6606   | 47.2% | 35.5% | 27.8% | 36.8% |
| ABTB2        | 25841  | 46.3% | 36.5% | 27.7% | 36.8% |
| DEFB108      | 245911 | 22.6% | 39.2% | 48.7% | 36.8% |
| PM5          | 23420  | 37.9% | 33.9% | 38.8% | 36.9% |
| CNGA4        | 1262   | 42.7% | 30.6% | 37.4% | 36.9% |
| NAV1         | 89796  | 37.6% | 37.8% | 35.3% | 36.9% |
| PH-4         | 54681  | 53.3% | 30.2% | 27.3% | 36.9% |
| SFTPB        | 6439   | 40.0% | 36.7% | 34.0% | 36.9% |
| CMKOR1       | 57007  | 37.7% | 41.7% | 31.4% | 36.9% |
| SH3BP5       | 9467   | 45.0% | 37.3% | 28.5% | 36.9% |
| KIAA0746     | 23231  | 29.6% | 36.4% | 44.8% | 36.9% |
| TFAP2A       | 7020   | 50.0% | 29.2% | 31.6% | 36.9% |
| DBH          | 1621   | 56.6% | 19.2% | 35.0% | 36.9% |
| ITM1         | 3703   | 42.2% | 36.1% | 32.6% | 37.0% |
| AMHR2        | 269    | 39.3% | 39.1% | 32.5% | 37.0% |
| OR6C65       | 403282 | 46.9% | 38.5% | 25.4% | 37.0% |
| FLJ10154     | 55082  | 44.3% | 34.4% | 32.2% | 37.0% |
| CDKN2D       | 1032   | 41.4% | 36.5% | 33.0% | 37.0% |
| C9ORF46      | 55848  | 33.7% | 39.6% | 37.6% | 37.0% |
| CLEC2L       | 154790 | 54.3% | 24.0% | 32.7% | 37.0% |
| ZCWCC2       | 79710  | 39.4% | 31.0% | 40.7% | 37.0% |
| IL12A        | 3592   | 37.6% | 38.7% | 34.7% | 37.0% |
| C14ORF161    | 79820  | 39.0% | 41.2% | 30.8% | 37.0% |
| PACE-1       | 57147  | 28.3% | 45.2% | 37.5% | 37.0% |
| RARB         | 5915   | 42.1% | 33.8% | 35.2% | 37.0% |
| C14ORF44     | 145483 | 41.3% | 34.5% | 35.2% | 37.0% |
| PELP1        | 27043  | 40.0% | 27.0% | 44.1% | 37.0% |
| PBX2         | 5089   | 40.1% | 35.6% | 35.4% | 37.0% |
| CCT5         | 22948  | 47.5% | 36.4% | 27.2% | 37.0% |
| STXBP4       | 252983 | 38.7% | 43.8% | 28.6% | 37.0% |
| CA4          | 762    | 52.2% | 23.6% | 35.4% | 37.1% |
| GSG2         | 83903  | 35.5% | 44.0% | 31.8% | 37.1% |
| KIAA1024     | 23251  | 39.9% | 30.1% | 41.3% | 37.1% |
| ORSA1        | 219982 | 41.1% | 34.8% | 35.4% | 37.1% |
| SULT2A1      | 6822   | 47.9% | 27.5% | 36.0% | 37.1% |
| CRYGA        | 1418   | 40.7% | 42.3% | 28.4% | 37.2% |
| PHLDB1       | 23187  | 36.6% | 35.5% | 39.4% | 37.2% |
| SPRR1A       | 6698   | 44.2% | 38.8% | 28.6% | 37.2% |
| SUPT4H1      | 6827   | 41.0% | 36.8% | 33.7% | 37.2% |
| FLJ23191     | 79625  | 34.9% | 33.0% | 43.7% | 37.2% |
| FLJ45910     | 388512 | 36.9% | 41.1% | 33.6% | 37.2% |
| TIMM10       | 26519  | 50.0% | 27.7% | 33.9% | 37.2% |
| DKFZP564K142 | 84061  | 37.7% | 29.6% | 44.3% | 37.2% |
| HMG2L1       | 10042  | 40.9% | 39.1% | 31.7% | 37.2% |
| NOTCH2NL     | 388677 | 40.0% | 41.6% | 30.0% | 37.2% |
| PRDM8        | 56978  | 45.1% | 26.8% | 39.8% | 37.2% |
| SQRDL        | 58472  | 55.9% | 18.7% | 37.1% | 37.2% |
| FLJ44186     | 346689 | 33.1% | 35.3% | 43.4% | 37.2% |
| IL1F10       | 84639  | 30.8% | 37.6% | 43.4% | 37.2% |
| PCDH81       | 29930  | 59.1% | 29.7% | 22.9% | 37.2% |
| GART         | 2618   | 60.6% | 29.3% | 21.8% | 37.3% |
| KRTAP4-10    | 85285  | 34.5% | 37.7% | 39.6% | 37.3% |
| ORZL8        | 391190 | 46.3% | 27.8% | 37.7% | 37.3% |

|           |        |       |       |       |       |
|-----------|--------|-------|-------|-------|-------|
| FMO3      | 2328   | 42.7% | 35.2% | 33.9% | 37.3% |
| ICT1      | 3396   | 59.5% | 15.5% | 36.8% | 37.3% |
| KIAA1787  | 84461  | 40.8% | 34.4% | 36.7% | 37.3% |
| FEV       | 54738  | 50.0% | 37.8% | 24.2% | 37.3% |
| NRL       | 4901   | 33.3% | 44.4% | 34.2% | 37.3% |
| KIAA0738  | 9747   | 51.9% | 19.5% | 40.7% | 37.3% |
| OR52K1    | 390036 | 37.2% | 41.2% | 33.8% | 37.4% |
| KRT6B     | 3854   | 51.3% | 38.2% | 22.6% | 37.4% |
| LOC340359 | 340359 | 45.9% | 29.6% | 36.6% | 37.4% |
| DSC3      | 1825   | 43.8% | 32.0% | 36.4% | 37.4% |
| FRAS1     | 80144  | 49.0% | 33.1% | 30.2% | 37.4% |
| C9ORF82   | 79886  | 45.5% | 30.3% | 36.5% | 37.4% |
| KIAA1328  | 57536  | 45.9% | 36.5% | 29.9% | 37.4% |
| GASP2     | 114928 | 39.0% | 30.2% | 43.2% | 37.4% |
| TUBAL3    | 79861  | 36.7% | 41.7% | 33.8% | 37.4% |
| ST8SIA3   | 51046  | 47.8% | 27.4% | 37.1% | 37.4% |
| RAPGF3    | 10411  | 54.7% | 29.1% | 28.5% | 37.4% |
| MGC3162   | 79050  | 27.8% | 37.5% | 47.1% | 37.4% |
| MGP       | 4256   | 43.8% | 38.4% | 30.2% | 37.4% |
| PLA2G4D   | 283748 | 48.2% | 32.2% | 31.9% | 37.4% |
| OR4B1     | 119765 | 28.2% | 46.3% | 38.0% | 37.5% |
| COX7B     | 1349   | 50.0% | 24.0% | 38.5% | 37.5% |
| ZNF429    | 353088 | 37.0% | 25.9% | 49.6% | 37.5% |
| FLJ13231  | 65250  | 32.4% | 43.5% | 36.7% | 37.5% |
| SCFD2     | 152579 | 34.3% | 43.5% | 34.7% | 37.5% |
| FKSG2     | 59347  | 43.8% | 36.6% | 32.3% | 37.5% |
| ZNF509    | 166793 | 32.7% | 42.4% | 37.5% | 37.5% |
| BCL2L13   | 23786  | 39.5% | 37.0% | 36.2% | 37.6% |
| SIM2      | 6493   | 49.3% | 33.3% | 30.1% | 37.6% |
| MGC57858  | 221491 | 22.7% | 33.3% | 56.7% | 37.6% |
| APOH      | 350    | 20.0% | 20.0% | 72.7% | 37.6% |
| ALDH5A1   | 7915   | 44.2% | 30.7% | 37.8% | 37.6% |
| USP50     | 373509 | 27.5% | 50.0% | 35.3% | 37.6% |
| HCA66     | 55813  | 39.0% | 31.5% | 42.4% | 37.6% |
| KRT12     | 3859   | 42.9% | 31.1% | 38.8% | 37.6% |
| SARS      | 6301   | 40.2% | 35.7% | 37.0% | 37.6% |
| OR5D16    | 390144 | 32.3% | 43.3% | 37.3% | 37.6% |
| IGSF9     | 57549  | 34.4% | 44.0% | 34.5% | 37.6% |
| SULF2     | 55959  | 43.9% | 37.9% | 31.1% | 37.6% |
| MBTD1     | 54799  | 51.3% | 34.2% | 27.5% | 37.6% |
| CXORF20   | 139105 | 58.9% | 24.4% | 29.7% | 37.6% |
| FLJ13154  | 79650  | 50.0% | 22.6% | 40.4% | 37.7% |
| OR6C4     | 341418 | 39.4% | 39.8% | 33.8% | 37.7% |
| TCL1A     | 8115   | 42.5% | 31.6% | 38.9% | 37.7% |
| ARCH      | 339487 | 42.9% | 33.9% | 36.4% | 37.7% |
| GHRHR     | 2692   | 41.5% | 29.2% | 42.3% | 37.7% |
| ATP13A5   | 344905 | 42.5% | 29.4% | 41.3% | 37.7% |
| AK2       | 204    | 42.7% | 35.2% | 35.2% | 37.7% |
| HIF1AN    | 55662  | 26.9% | 56.5% | 29.7% | 37.7% |
| PRKACA    | 5566   | 40.9% | 31.0% | 41.2% | 37.7% |
| LMNB1     | 4001   | 30.2% | 39.3% | 43.7% | 37.7% |
| SRGAP1    | 57522  | 46.4% | 40.0% | 26.9% | 37.7% |
| TSC2      | 7249   | 47.0% | 33.2% | 33.0% | 37.8% |
| CDH8      | 1006   | 36.9% | 41.1% | 35.3% | 37.8% |
| GSK3B     | 2932   | 36.4% | 53.8% | 23.1% | 37.8% |
| COP57A    | 50813  | 50.0% | 27.3% | 36.2% | 37.8% |
| C6ORF159  | 134701 | 44.6% | 46.3% | 22.6% | 37.8% |
| MRPL11    | 65003  | 41.8% | 37.5% | 34.2% | 37.8% |
| ZBTB10    | 65986  | 43.7% | 36.5% | 33.3% | 37.8% |
| NOX5      | 79400  | 45.7% | 26.5% | 41.4% | 37.9% |
| ITM2B     | 9445   | 47.0% | 32.9% | 33.7% | 37.9% |
| ZF        | 58487  | 41.7% | 32.1% | 39.8% | 37.9% |
| NDUFAB1   | 4706   | 46.7% | 26.8% | 40.2% | 37.9% |
| SESN1     | 27244  | 48.3% | 35.8% | 29.6% | 37.9% |
| LRP15     | 116135 | 33.8% | 35.4% | 44.5% | 37.9% |
| PPP2R2B   | 5521   | 34.2% | 41.4% | 38.2% | 37.9% |
| UNQ3033   | 284415 | 43.7% | 39.6% | 30.6% | 38.0% |
| SATL1     | 340562 | 47.7% | 26.0% | 40.2% | 38.0% |
| FLJ25333  | 153643 | 30.5% | 45.3% | 38.1% | 38.0% |
| MGC4659   | 80757  | 33.3% | 42.3% | 38.4% | 38.0% |
| KUA       | 387521 | 48.8% | 32.5% | 32.7% | 38.0% |
| TCERG1L   | 256536 | 56.0% | 30.3% | 27.8% | 38.1% |
| ARNT2     | 9915   | 32.5% | 46.4% | 35.4% | 38.1% |
| RPAP1     | 26015  | 54.1% | 29.2% | 31.0% | 38.1% |
| RLF       | 6018   | 43.1% | 35.2% | 36.0% | 38.1% |
| NEK3      | 4752   | 41.5% | 34.4% | 38.4% | 38.1% |
| CXORF12   | 8269   | 30.1% | 33.3% | 51.0% | 38.1% |
| H0XB6     | 3216   | 31.3% | 41.7% | 41.5% | 38.1% |
| ANP32A    | 8125   | 42.8% | 30.0% | 41.6% | 38.1% |
| FLJ20241  | 54862  | 38.8% | 34.8% | 40.8% | 38.1% |
| SPIRE1    | 56907  | 49.4% | 31.0% | 34.1% | 38.1% |
| BIRC1     | 4671   | 51.9% | 24.2% | 38.4% | 38.2% |
| FGB       | 2244   | 43.2% | 32.4% | 38.9% | 38.2% |
| FY        | 2532   | 42.0% | 38.5% | 34.1% | 38.2% |
| GJB7      | 375519 | 42.7% | 28.5% | 43.4% | 38.2% |
| IFNA1     | 3439   | 50.4% | 34.3% | 30.1% | 38.3% |
| VAMP8     | 8673   | 35.0% | 33.9% | 45.9% | 38.3% |
| SPTA1     | 6708   | 42.9% | 38.4% | 33.7% | 38.3% |
| L3MBTL    | 26013  | 40.1% | 31.5% | 43.4% | 38.3% |
| KIAA0494  | 9813   | 41.3% | 35.8% | 38.0% | 38.4% |
| PABPC1    | 26986  | 50.9% | 34.9% | 29.3% | 38.4% |
| FZR1      | 51343  | 37.0% | 46.6% | 31.5% | 38.4% |
| CYP8B1    | 1582   | 41.7% | 35.7% | 37.8% | 38.4% |
| PRPF39    | 55015  | 37.4% | 29.6% | 48.2% | 38.4% |
| FLJ37953  | 129450 | 41.1% | 34.9% | 39.3% | 38.4% |
| MGC35558  | 219833 | 26.1% | 39.3% | 50.0% | 38.5% |
| ANKRD11   | 29123  | 45.4% | 39.5% | 30.5% | 38.5% |
| ABCC4     | 10257  | 49.5% | 33.3% | 32.5% | 38.5% |

|           |        |       |       |       |       |
|-----------|--------|-------|-------|-------|-------|
| DDX26     | 26512  | 39.8% | 38.3% | 37.4% | 38.5% |
| MYH6      | 4624   | 46.9% | 31.4% | 37.1% | 38.5% |
| KAZALD1   | 81621  | 44.1% | 41.1% | 30.2% | 38.5% |
| ACTG2     | 72     | 57.1% | 25.0% | 33.3% | 38.5% |
| TP53TG3   | 24150  | 49.5% | 30.9% | 35.1% | 38.5% |
| SERTAD3   | 29946  | 42.2% | 39.4% | 33.9% | 38.5% |
| SSRP1     | 6749   | 47.2% | 28.4% | 40.2% | 38.6% |
| NOX4      | 50507  | 41.8% | 36.3% | 37.6% | 38.6% |
| MCM10     | 55388  | 44.6% | 33.9% | 37.2% | 38.6% |
| CR2       | 1380   | 46.5% | 35.7% | 33.6% | 38.6% |
| RBM29     | 84173  | 42.9% | 36.3% | 36.6% | 38.6% |
| C15ORF24  | 56851  | 35.1% | 38.0% | 42.9% | 38.6% |
| LRRC21    | 26103  | 49.3% | 34.1% | 32.4% | 38.6% |
| SULT1C3   | 442038 | 43.3% | 40.8% | 31.7% | 38.6% |
| SYK       | 6850   | 35.3% | 35.4% | 45.2% | 38.7% |
| CDS8      | 965    | 43.9% | 38.7% | 33.4% | 38.7% |
| RBP2      | 5948   | 55.9% | 24.2% | 36.1% | 38.7% |
| ITGAV     | 3685   | 40.0% | 19.0% | 57.1% | 38.7% |
| ARL6IP2   | 64225  | 56.9% | 29.2% | 30.1% | 38.7% |
| CDC42EP1  | 11135  | 42.0% | 41.1% | 33.2% | 38.7% |
| SES2      | 83667  | 51.3% | 24.9% | 40.2% | 38.8% |
| PTBP2     | 58155  | 39.2% | 33.3% | 43.9% | 38.8% |
| CLDN16    | 10686  | 44.0% | 36.5% | 36.0% | 38.8% |
| TRAPP1    | 58485  | 41.9% | 43.8% | 30.9% | 38.9% |
| C3orf31   | 132001 | 60.2% | 25.8% | 30.6% | 38.9% |
| C7ORF30   | 115416 | 41.8% | 43.6% | 31.3% | 38.9% |
| NFX1      | 4799   | 32.4% | 36.0% | 48.4% | 38.9% |
| PCDHAC2   | 56134  | 45.3% | 33.7% | 37.7% | 38.9% |
| BAGE2     | 85319  | 45.7% | 29.8% | 41.3% | 39.0% |
| C6ORF32   | 9750   | 39.0% | 40.6% | 37.3% | 39.0% |
| CLST11240 | 51751  | 47.0% | 36.0% | 33.9% | 39.0% |
| PMF1      | 11243  | 40.6% | 35.6% | 40.8% | 39.0% |
| DAF       | 1604   | 38.2% | 39.5% | 39.3% | 39.0% |
| KRTHA5    | 3886   | 53.8% | 28.6% | 34.6% | 39.0% |
| KRTAP4-5  | 85289  | 37.1% | 37.9% | 42.1% | 39.0% |
| CNTN5     | 53942  | 44.6% | 43.3% | 29.2% | 39.1% |
| SLC12A8   | 84561  | 34.6% | 45.3% | 37.3% | 39.1% |
| MGC39497  | 144321 | 48.1% | 33.0% | 36.1% | 39.1% |
| XTP3TPA   | 79077  | 39.6% | 46.0% | 31.9% | 39.2% |
| IL2RG     | 3561   | 55.2% | 27.1% | 35.3% | 39.2% |
| SLC39A8   | 64116  | 50.0% | 31.7% | 35.9% | 39.2% |
| SGTA      | 6449   | 35.3% | 42.3% | 40.0% | 39.2% |
| GABRA3    | 2556   | 36.9% | 33.6% | 47.2% | 39.2% |
| PYY       | 5697   | 38.7% | 44.4% | 34.6% | 39.2% |
| CDH11     | 1009   | 48.8% | 33.5% | 35.5% | 39.3% |
| RFC4      | 5984   | 36.8% | 33.6% | 47.3% | 39.3% |
| CHI3L1    | 1116   | 47.4% | 33.6% | 36.9% | 39.3% |
| EFNA4     | 1945   | 39.0% | 46.3% | 32.6% | 39.3% |
| TAS2R4    | 50832  | 48.8% | 36.6% | 32.5% | 39.3% |
| GABRP     | 2568   | 45.1% | 42.4% | 30.6% | 39.4% |
| PLEKHH1   | 57475  | 32.4% | 51.7% | 34.1% | 39.4% |
| FLJ11155  | 55314  | 37.8% | 45.0% | 35.5% | 39.4% |
| KERA      | 11081  | 63.4% | 27.1% | 27.7% | 39.4% |
| MTMR9     | 66036  | 40.8% | 46.5% | 31.0% | 39.4% |
| GNB3      | 2784   | 47.6% | 38.8% | 32.0% | 39.5% |
| PRDM4     | 11108  | 51.0% | 34.5% | 32.9% | 39.5% |
| NCOA7     | 135112 | 45.9% | 39.6% | 32.9% | 39.5% |
| GPS1      | 2873   | 50.3% | 27.5% | 40.7% | 39.5% |
| POLR3B    | 55703  | 50.0% | 27.7% | 40.9% | 39.5% |
| CDC26     | 246184 | 32.9% | 38.5% | 47.2% | 39.5% |
| PRDX6     | 9588   | 49.7% | 36.3% | 32.6% | 39.5% |
| ZNF610    | 162963 | 48.3% | 41.3% | 29.0% | 39.5% |
| SRRP35    | 135295 | 37.9% | 37.6% | 43.3% | 39.6% |
| THEDC1    | 55301  | 54.4% | 38.1% | 26.3% | 39.6% |
| KIAA1529  | 57653  | 39.5% | 28.2% | 51.2% | 39.6% |
| FLRT3     | 23767  | 46.0% | 34.2% | 38.8% | 39.7% |
| BAGE4     | 85317  | 50.3% | 36.6% | 32.0% | 39.7% |
| TMEM22    | 80723  | 43.7% | 43.2% | 32.1% | 39.7% |
| RIC3      | 79608  | 54.2% | 29.7% | 35.2% | 39.7% |
| MOCOS     | 55034  | 58.3% | 25.0% | 35.8% | 39.7% |
| COL9A3    | 1299   | 50.0% | 43.2% | 25.8% | 39.7% |
| PLEK2     | 26499  | 53.9% | 31.9% | 33.3% | 39.7% |
| LCP2      | 3937   | 46.7% | 32.5% | 39.9% | 39.7% |
| COL1A2    | 1278   | 38.5% | 37.3% | 43.4% | 39.8% |
| PDE4B     | 5142   | 47.5% | 35.8% | 36.1% | 39.8% |
| BCL7B     | 9275   | 55.3% | 38.5% | 25.6% | 39.8% |
| CDC42     | 998    | 45.3% | 41.8% | 32.3% | 39.8% |
| IFNB1     | 3456   | 48.5% | 32.8% | 38.1% | 39.8% |
| BMP7      | 655    | 50.0% | 26.9% | 42.6% | 39.8% |
| C6ORF199  | 221264 | 45.9% | 42.4% | 31.2% | 39.8% |
| SLC13A5   | 284111 | 35.0% | 64.7% | 19.8% | 39.8% |
| COL5A3    | 50509  | 37.6% | 39.9% | 42.1% | 39.8% |
| PTGDR     | 5729   | 48.9% | 38.2% | 32.5% | 39.9% |
| SPINK4    | 27290  | 50.0% | 41.5% | 28.1% | 39.9% |
| ZNF432    | 9668   | 46.6% | 38.9% | 34.2% | 39.9% |
| ITIH2     | 3698   | 41.1% | 37.8% | 41.0% | 39.9% |
| SUI1      | 10209  | 45.6% | 33.3% | 41.0% | 40.0% |
| SULF1     | 23213  | 44.4% | 32.7% | 42.8% | 40.0% |
| MAEA      | 10296  | 56.8% | 34.5% | 28.6% | 40.0% |
| HNRPU     | 3192   | 51.9% | 32.6% | 35.5% | 40.0% |
| LCE1C     | 353133 | 43.7% | 33.3% | 42.9% | 40.0% |
| EMR3      | 84658  | 42.9% | 34.3% | 42.9% | 40.0% |
| CASP2     | 835    | 44.7% | 44.3% | 31.1% | 40.0% |
| USP42     | 84132  | 50.7% | 29.9% | 39.6% | 40.1% |
| SRGAP2    | 23380  | 43.3% | 41.3% | 35.6% | 40.1% |
| CRISP3    | 10321  | 52.3% | 39.5% | 28.5% | 40.1% |
| TNP2      | 7142   | 38.6% | 40.7% | 41.1% | 40.1% |
| TTYH2     | 94015  | 33.8% | 47.0% | 39.7% | 40.2% |

|               |        |       |       |       |       |
|---------------|--------|-------|-------|-------|-------|
| ARPP-19       | 10776  | 50.4% | 40.9% | 29.2% | 40.2% |
| BAF53A        | 86     | 62.2% | 25.4% | 33.0% | 40.2% |
| PHTF2         | 57157  | 42.3% | 26.8% | 51.7% | 40.2% |
| C9ORF19       | 152007 | 45.9% | 43.0% | 31.9% | 40.3% |
| LG11          | 9211   | 23.1% | 42.9% | 55.0% | 40.3% |
| HEBP1         | 50865  | 50.6% | 35.9% | 34.6% | 40.3% |
| PALMD         | 54873  | 53.0% | 40.2% | 27.8% | 40.3% |
| PLEKHG4       | 25894  | 49.3% | 34.3% | 37.9% | 40.5% |
| KIAA1055      | 23102  | 34.8% | 36.4% | 50.4% | 40.5% |
| ZNF322B       | 387328 | 44.7% | 40.9% | 35.9% | 40.5% |
| LOC375035     | 375035 | 40.0% | 15.0% | 66.7% | 40.6% |
| PPP1CA        | 5499   | 36.0% | 46.0% | 39.7% | 40.6% |
| NAPE-PLD      | 222236 | 52.4% | 32.2% | 37.2% | 40.6% |
| TPSG1         | 25823  | 41.9% | 39.3% | 40.6% | 40.6% |
| BM039         | 55839  | 42.7% | 31.0% | 48.2% | 40.6% |
| CXX1          | 8933   | 34.8% | 44.4% | 42.9% | 40.7% |
| C9ORF121      | 158046 | 43.9% | 40.3% | 37.8% | 40.7% |
| DIRC2         | 84925  | 42.4% | 40.0% | 39.8% | 40.7% |
| LOC284009     | 284009 | 46.3% | 43.9% | 31.9% | 40.7% |
| ZNF318        | 24149  | 65.9% | 21.3% | 35.1% | 40.8% |
| IFI44         | 10561  | 37.9% | 46.7% | 37.7% | 40.8% |
| KIAA1465      | 57611  | 44.6% | 38.0% | 39.7% | 40.8% |
| C14ORF58      | 55640  | 39.0% | 46.5% | 37.0% | 40.8% |
| IL20RB        | 53833  | 49.4% | 35.3% | 37.8% | 40.8% |
| PHC1          | 1911   | 40.0% | 41.0% | 41.6% | 40.9% |
| ZFY           | 7544   | 60.0% | 40.7% | 22.1% | 40.9% |
| ORS1Q1        | 390061 | 33.7% | 37.8% | 51.3% | 40.9% |
| FLJ10315      | 55116  | 42.7% | 33.9% | 46.3% | 41.0% |
| MS4AGE        | 245802 | 41.8% | 48.9% | 32.2% | 41.0% |
| FBL           | 2091   | 46.7% | 36.8% | 39.6% | 41.0% |
| DPYSL3        | 1809   | 62.5% | 40.0% | 20.8% | 41.1% |
| APOM          | 55937  | 39.3% | 42.6% | 41.4% | 41.1% |
| HIBADH        | 11112  | 45.6% | 23.6% | 54.2% | 41.1% |
| C21ORF56      | 84221  | 48.8% | 43.9% | 31.1% | 41.3% |
| DJ38314.3     | 91687  | 28.2% | 40.2% | 55.6% | 41.3% |
| SDS3          | 64426  | 22.0% | 49.7% | 52.5% | 41.4% |
| STAU2         | 27067  | 47.0% | 37.9% | 39.3% | 41.4% |
| WDR20         | 91833  | 44.3% | 41.5% | 38.6% | 41.5% |
| NEIL1         | 79661  | 64.1% | 33.2% | 27.1% | 41.5% |
| LOC126147     | 126147 | 55.8% | 34.8% | 33.8% | 41.5% |
| ZNF236        | 7776   | 52.7% | 34.1% | 37.6% | 41.5% |
| SMOC2         | 64094  | 61.1% | 36.7% | 26.6% | 41.5% |
| DLGAP4        | 22839  | 46.8% | 42.9% | 34.8% | 41.5% |
| UBE2N         | 7334   | 50.0% | 27.8% | 46.8% | 41.5% |
| FLJ12476      | 64799  | 38.4% | 36.4% | 49.9% | 41.5% |
| LOC149469     | 149469 | 41.4% | 35.7% | 47.6% | 41.6% |
| TMED8         | 283578 | 54.1% | 33.0% | 37.6% | 41.6% |
| LOC283152     | 283152 | 45.8% | 43.4% | 35.7% | 41.6% |
| SLC2A12       | 154091 | 43.8% | 42.4% | 38.6% | 41.6% |
| FLJ20344      | 55634  | 39.3% | 40.4% | 45.3% | 41.7% |
| CYLD          | 1540   | 43.7% | 42.9% | 38.7% | 41.7% |
| FBXW7         | 55294  | 47.5% | 32.5% | 45.2% | 41.7% |
| EEF1E1        | 9521   | 46.6% | 42.4% | 36.5% | 41.8% |
| ZNF347        | 84671  | 60.0% | 34.2% | 31.6% | 41.9% |
| CXCL3         | 2921   | 43.2% | 43.7% | 39.0% | 41.9% |
| ZFP37         | 7539   | 65.8% | 28.1% | 32.4% | 42.1% |
| TRIM33        | 51592  | 42.6% | 40.6% | 43.4% | 42.2% |
| NY-REN-7      | 285596 | 50.0% | 44.6% | 32.1% | 42.2% |
| RNF43         | 54894  | 47.1% | 41.7% | 38.1% | 42.3% |
| SPANXA2       | 728712 | 48.1% | 35.3% | 43.5% | 42.3% |
| TEAD1         | 7003   | 49.3% | 39.2% | 39.0% | 42.5% |
| RCE1          | 9986   | 44.4% | 34.6% | 48.6% | 42.5% |
| ACTN3         | 89     | 45.9% | 44.7% | 37.0% | 42.6% |
| EEF2          | 1938   | 50.0% | 33.3% | 44.4% | 42.6% |
| PAK1          | 5058   | 45.8% | 42.1% | 39.9% | 42.6% |
| CSAD          | 51380  | 44.2% | 48.5% | 35.1% | 42.6% |
| ZNF430        | 80264  | 45.2% | 40.5% | 42.4% | 42.7% |
| DKFZP686O1689 | 341405 | 31.0% | 61.9% | 35.3% | 42.7% |
| CYP4Z1        | 199974 | 41.4% | 42.9% | 43.9% | 42.8% |
| PPFIA2        | 8499   | 49.2% | 42.2% | 36.9% | 42.8% |
| IFNAR2        | 3455   | 51.1% | 36.2% | 41.3% | 42.9% |
| SEMA3C        | 10512  | 52.1% | 39.7% | 37.2% | 43.0% |
| KRTAP11-1     | 337880 | 46.1% | 47.5% | 35.4% | 43.0% |
| AMBP          | 259    | 50.8% | 40.3% | 37.9% | 43.0% |
| HNRPK         | 3190   | 63.6% | 15.4% | 50.0% | 43.0% |
| ANLN          | 54443  | 33.3% | 66.7% | 29.4% | 43.1% |
| SNTA1         | 6640   | 57.1% | 37.0% | 35.3% | 43.2% |
| PPP1R12A      | 4659   | 34.8% | 53.7% | 41.0% | 43.2% |
| DNAJC12       | 56521  | 53.3% | 37.8% | 38.6% | 43.2% |
| ORSAT1        | 284532 | 37.6% | 50.2% | 42.1% | 43.3% |
| TSGL1         | 7251   | 39.2% | 50.7% | 40.0% | 43.3% |
| STAT1P1       | 55250  | 44.2% | 51.9% | 34.4% | 43.5% |
| PMPCB         | 9512   | 48.7% | 43.2% | 39.0% | 43.6% |
| RPS6          | 6194   | 68.8% | 22.2% | 40.0% | 43.7% |
| CACNA1S       | 779    | 36.4% | 40.0% | 54.7% | 43.7% |
| ORS2M1        | 119772 | 55.6% | 47.5% | 28.4% | 43.8% |
| C9            | 735    | 45.4% | 45.9% | 40.1% | 43.8% |
| USP36         | 57602  | 47.4% | 45.1% | 38.9% | 43.8% |
| ZNF69         | 7620   | 54.1% | 40.4% | 37.5% | 44.0% |
| ANAPC2        | 29882  | 51.2% | 35.3% | 45.9% | 44.1% |
| CEP1          | 11064  | 55.1% | 39.0% | 38.2% | 44.1% |
| LOC146325     | 146325 | 41.4% | 46.9% | 44.6% | 44.3% |
| WNT10B        | 7480   | 63.6% | 38.0% | 31.4% | 44.4% |
| ANAPC1        | 64682  | 47.5% | 45.4% | 40.2% | 44.4% |
| DHFR          | 1719   | 45.1% | 46.5% | 42.7% | 44.8% |
| PPARBP        | 5469   | 61.2% | 36.8% | 36.8% | 44.9% |
| PAX8          | 7849   | 44.3% | 41.2% | 49.4% | 45.0% |
| OTUD5         | 55593  | 44.3% | 66.7% | 24.0% | 45.0% |



|           |        |       |       |       |       |   |
|-----------|--------|-------|-------|-------|-------|---|
| ATP2A2    | 488    | 55.6% | 42.5% | 37.1% | 45.0% | * |
| CHRM3     | 1131   | 45.7% | 52.1% | 37.5% | 45.1% | * |
| NUP160    | 23279  | 62.5% | 50.0% | 23.1% | 45.2% | * |
| PDGFB     | 5155   | 54.8% | 42.6% | 38.5% | 45.3% | * |
| TMEM14B   | 81853  | 55.6% | 38.8% | 41.6% | 45.3% | * |
| LDB2      | 9079   | 60.7% | 41.2% | 34.5% | 45.5% | * |
| KRTHA3B   | 3884   | 67.9% | 21.9% | 46.8% | 45.5% | * |
| BMP3      | 651    | 25.6% | 58.3% | 53.4% | 45.8% | * |
| CDC16     | 8881   | 50.4% | 29.7% | 58.8% | 46.3% | * |
| TBL2      | 26608  | 56.9% | 39.9% | 43.4% | 46.7% | * |
| PATE      | 160065 | 63.9% | 43.0% | 33.3% | 46.8% | * |
| RAB11FIP1 | 80223  | 45.5% | 59.1% | 35.8% | 46.8% | * |
| RABGEF1   | 27342  | 67.3% | 37.5% | 35.8% | 46.9% | * |
| C10ORF9   | 219771 | 34.1% | 55.6% | 51.1% | 46.9% | * |
| MIPOL1    | 145282 | 43.0% | 60.6% | 37.3% | 46.9% | * |
| BRD4      | 23476  | 50.9% | 42.9% | 47.4% | 47.1% | * |
| RAD17     | 5884   | 50.0% | 34.2% | 57.4% | 47.2% | * |
| PADI1     | 29943  | 55.2% | 45.8% | 41.2% | 47.4% | * |
| NDUFV3    | 4731   | 34.5% | 50.4% | 57.6% | 47.5% | * |
| FLJ40244  | 254272 | 58.9% | 49.3% | 37.9% | 48.7% | * |
| AKAP8L    | 26993  | 57.4% | 40.6% | 48.4% | 48.8% | * |
| TNA       | 7123   | 44.7% | 45.5% | 56.8% | 49.0% | * |
| SEC61G    | 23480  | 60.6% | 41.4% | 54.5% | 52.2% | * |
| IGFL4     | 444882 | 73.4% | 42.4% | 43.0% | 52.9% | * |
| NUP107    | 57122  | 57.7% | 54.4% | 46.8% | 53.0% | * |
| PARVA     | 55742  | 77.6% | 32.4% | 49.9% | 53.3% | * |
| ANAPC5    | 51433  | 66.4% | 45.1% | 56.5% | 56.0% | * |
| NSF       | 4905   | 78.6% | 47.5% | 52.7% | 59.6% | * |
| CDH19     | 28513  | 83.3% | 60.9% | 37.9% | 60.7% | * |
| TYMS      | 7298   | 72.4% | 49.5% | 71.9% | 64.6% | * |
