# Supplementary material
Source: PubMed Central journal article supplement (PMC4651756)
Supplement: NIHMS729683-supplement-4.pdf [file NIHMS729683-supplement-4.pdf]

**Supplemental Table 2.** The table contains robust Z-scores for yH2AX and Edu analyzed as individual parameters as well as the RRS robust Z-score for each screen replicate and the sum of all three replicates. A positive Z-score for yH2AX indicates high yH2AX levels; a negative Z-score for Edu indicates low Edu incorporation levels. The RRS value was calculated as the raw yH2AX/Edu ratio prior to calculating the RRS Z-score.

| Gene Symbol | Gene ID | Gene Accession | Original Rank (Based on RRS Sum) | Replicate 1 Robust Z-Score | Replicate 2 Robust Z-Score | Replicate 3 Robust Z-Score | Replicate 4 Robust Z-Score | Replicate 5 Robust Z-Score | Replicate 6 Robust Z-Score | Replicate 7 Robust Z-Score | Replicate 8 Robust Z-Score | Replicate 9 Robust Z-Score | Replicate 10 Robust Z-Score | Sum of Robust Z-Scores | Sum of Robust Z-Scores | Sum of Robust Z-Scores |
|-------------|---------|----------------|----------------------------------|----------------------------|----------------------------|----------------------------|----------------------------|----------------------------|----------------------------|----------------------------|----------------------------|----------------------------|-----------------------------|------------------------|------------------------|------------------------|
| RP11        | 6137    | NM_020295      | 1                                | 13.35                      | 10.80                      | 8.18                       | -2.38                      | -2.01                      | -1.89                      | 40.77                      | 27.70                      | 20.28                      | 32.13                       | -6.27                  | 88.74                  | 3.6                    |
| POLA1       | 5420    | NM_001091      | 2                                | 10.16                      | 4.84                       | 3.00                       | -2.29                      | -2.40                      | -1.89                      | 35.08                      | 27.11                      | 21.89                      | 31.41                       | -6.41                  | 84.61                  | 3.6                    |
| ATP5G3      | 518     | NM_001069      | 3                                | 12.51                      | 10.69                      | 1.35                       | -2.22                      | -2.11                      | -1.76                      | 41.14                      | 39.37                      | 4.18                       | 24.55                       | -6.10                  | 84.69                  | 3.6                    |
| RP2A        | 6118    | NM_020296      | 4                                | 13.56                      | 15.49                      | 9.01                       | -2.25                      | -2.36                      | -1.98                      | 36.77                      | 31.82                      | 15.60                      | 38.06                       | -6.59                  | 84.20                  | 3.6                    |
| 11L1K1      | 131     | NM_015274      | 5                                | -1.43                      | 5.25                       | 1.41                       | -1.75                      | -1.78                      | -1.65                      | 40.35                      | 30.96                      | 19.79                      | 5.41                        | -7.12                  | 73.88                  | 3.6                    |
| IL13T7      | 23705   | NM_014339      | 6                                | 7.88                       | 6.00                       | 2.84                       | -2.25                      | -2.06                      | -2.04                      | 34.28                      | 23.96                      | 17.70                      | 16.71                       | -6.35                  | 75.95                  | 3.6                    |
| PHF23       | 79142   | NM_024297      | 7                                | 12.18                      | 8.86                       | 12.47                      | -1.76                      | -2.00                      | -1.77                      | 31.54                      | 23.92                      | 19.87                      | 33.50                       | -5.53                  | 75.33                  | 3.6                    |
| MAP2L       | 26950   | NM_014371      | 8                                | 8.00                       | 10.00                      | 8.40                       | -2.39                      | -2.11                      | -1.66                      | 27.24                      | 28.21                      | 18.43                      | 26.50                       | -6.17                  | 73.88                  | 3.6                    |
| WEE1        | 7465    | NM_003390      | 9                                | 6.56                       | 3.32                       | 5.10                       | -2.05                      | -2.10                      | -1.45                      | 29.39                      | 17.21                      | 25.63                      | 13.98                       | -5.60                  | 72.27                  | 3.6                    |
| ZNF2978     | 23999   | NM_014007      | 10                               | 13.59                      | 15.85                      | 8.79                       | -1.31                      | -1.35                      | -0.58                      | 18.33                      | 32.09                      | 9.00                       | 38.23                       | -3.24                  | 60.31                  | 3.6                    |
| NF1UN       | 23479   | NM_213995      | 11                               | 6.35                       | 3.72                       | 4.39                       | -2.22                      | -2.28                      | -1.64                      | 28.14                      | 18.29                      | 15.52                      | 14.47                       | -6.23                  | 59.95                  | 3.6                    |
| ATR         | 545     | NM_001184      | 12                               | 11.33                      | 7.82                       | 5.27                       | -1.51                      | -1.58                      | -1.87                      | 23.38                      | 20.63                      | 15.93                      | 24.43                       | -4.95                  | 59.94                  | 3.6                    |
| SHMT1       | 6470    | NM_148918      | 13                               | 5.47                       | 4.86                       | 4.97                       | -1.92                      | -2.10                      | -2.04                      | 21.17                      | 20.42                      | 16.21                      | 15.30                       | -6.05                  | 57.80                  | 3.6                    |
| BAT5        | 7920    | NM_021160      | 14                               | 4.14                       | 8.61                       | 10.93                      | -1.93                      | -1.80                      | -1.67                      | 10.92                      | 22.82                      | 22.66                      | 23.68                       | -5.40                  | 56.40                  | 3.6                    |
| CD3OR9      | 51028   | NM_010705      | 15                               | 11.53                      | 4.78                       | 3.73                       | -2.03                      | -2.27                      | -1.50                      | 23.83                      | 20.86                      | 9.39                       | 20.04                       | -5.79                  | 53.88                  | 3.6                    |
| ADAM29      | 11086   | NM_014269      | 16                               | 4.72                       | 6.91                       | 5.24                       | -1.71                      | -2.16                      | -2.12                      | 10.51                      | 25.32                      | 17.41                      | 16.87                       | -5.99                  | 53.25                  | 3.6                    |
| OMP2A       | 29991   | NM_014582      | 17                               | 7.87                       | 8.53                       | 5.03                       | -0.50                      | -1.80                      | -1.38                      | 13.28                      | 24.44                      | 14.76                      | 21.43                       | -3.68                  | 52.48                  | 3.6                    |
| LOC157208   | 157208  | NM_008367      | 18                               | 4.91                       | 9.97                       | 7.31                       | -0.83                      | -1.09                      | -0.91                      | 12.7                       | 19.10                      | 11.80                      | 27.18                       | -2.83                  | 52.27                  | 3.6                    |
| MGC55033    | 122173  | NM_115219      | 19                               | 2.00                       | 4.68                       | 2.72                       | -2.08                      | -2.62                      | -1.88                      | 12.59                      | 27.69                      | 11.59                      | 9.40                        | -6.58                  | 51.47                  | 3.6                    |
| FLH4374     | 377007  | NM_198582      | 20                               | 8.67                       | 9.46                       | 6.14                       | -1.64                      | -1.45                      | -1.17                      | 21.78                      | 16.30                      | 12.80                      | 24.27                       | -4.26                  | 50.87                  | 3.6                    |
| NDC1212     | 10586   | NM_004439      | 21                               | 11.15                      | 10.00                      | 5.97                       | -1.31                      | -2.09                      | -1.24                      | 20.93                      | 21.22                      | 7.89                       | 27.52                       | -4.65                  | 50.02                  | 3.6                    |
| CTFL1       | 147     | NM_00013322    | 22                               | 5.35                       | 3.56                       | 4.07                       | -1.80                      | -2.62                      | -2.01                      | 16.41                      | 22.48                      | 11.50                      | 10.58                       | -6.42                  | 49.02                  | 3.6                    |
| LCT         | 3938    | NM_002299      | 23                               | 8.84                       | 9.04                       | 5.38                       | -1.61                      | -1.44                      | -0.91                      | 21.19                      | 20.59                      | 7.86                       | 23.26                       | -3.97                  | 49.63                  | 3.6                    |
| LOC120308   | 54890   | NM_017758      | 24                               | 7.08                       | 4.32                       | 5.68                       | -1.62                      | -1.47                      | -1.41                      | 19.39                      | 15.17                      | 14.64                      | 17.08                       | -4.50                  | 49.20                  | 3.6                    |
| ARHG2       | 84658   | NM_152529      | 25                               | 11.79                      | 10.71                      | 7.11                       | -1.42                      | -1.37                      | -1.62                      | 15.03                      | 11.88                      | 12.17                      | 14.31                       | -3.61                  | 47.11                  | 3.6                    |
| TP53        | 7157    | NM_000546      | 26                               | 1.97                       | 3.78                       | 2.82                       | -1.42                      | -2.00                      | -1.97                      | 8.19                       | 21.06                      | 19.22                      | 8.58                        | -3.38                  | 48.47                  | 3.6                    |
| MGC11271    | 79173   | NM_024323      | 27                               | 7.45                       | 12.54                      | 6.08                       | -1.90                      | -1.13                      | -1.40                      | 14.48                      | 19.77                      | 13.30                      | 26.06                       | -4.43                  | 47.55                  | 3.6                    |
| HLH2        | 11275   | NM_000627      | 28                               | 6.29                       | 6.27                       | 6.48                       | -1.28                      | -2.02                      | -1.64                      | 17.28                      | 22.70                      | 7.23                       | 24.04                       | -2.28                  | 47.28                  | 3.6                    |
| KCNAA4      | 3739    | NM_002233      | 29                               | 5.78                       | 4.88                       | 3.41                       | -1.82                      | -1.22                      | -1.56                      | 21.65                      | 12.29                      | 12.37                      | 14.07                       | -4.61                  | 46.32                  | 3.6                    |
| NTNG2       | 84628   | NM_032536      | 30                               | 6.44                       | 6.49                       | 7.43                       | -2.03                      | -1.24                      | -1.47                      | 19.75                      | 13.58                      | 12.89                      | 20.37                       | -4.73                  | 46.22                  | 3.6                    |
| DNAH7       | 1717    | NM_001360      | 31                               | 5.52                       | 6.97                       | 5.95                       | -1.60                      | -1.49                      | -1.58                      | 10.74                      | 14.59                      | 19.47                      | 18.44                       | -4.67                  | 44.80                  | 3.6                    |
| LOC107218   | 12495   | NM_005643      | 32                               | 6.05                       | 6.43                       | 4.45                       | -1.43                      | -1.75                      | -1.33                      | 11.07                      | 13.07                      | 16.60                      | 11.44                       | -4.26                  | 43.42                  | 3.6                    |
| CSFG5       | 10675   | NM_006074      | 33                               | 4.79                       | 4.87                       | 4.28                       | -1.69                      | -2.40                      | -2.18                      | 16.04                      | 16.61                      | 10.77                      | 13.94                       | -6.26                  | 43.42                  | 3.6                    |
| CDNF4       | 23732   | NM_014334      | 34                               | 2.22                       | 4.48                       | 2.52                       | -0.98                      | -1.55                      | -1.88                      | 9.42                       | 19.78                      | 13.51                      | 9.22                        | -4.42                  | 42.71                  | 3.6                    |
| FONK1       | 2382    | NM_001454      | 35                               | 5.35                       | 6.51                       | 3.60                       | -1.52                      | -1.76                      | -1.65                      | 10.32                      | 10.35                      | 15.76                      | 15.05                       | -4.76                  | 40.68                  | 3.6                    |
| ZNF727      | 79727   | NM_024674      | 36                               | 2.87                       | 3.16                       | 3.01                       | -2.13                      | -2.15                      | -2.48                      | 14.16                      | 13.18                      | 13.63                      | 9.04                        | -6.76                  | 40.98                  | 3.6                    |
| CHERP       | 10523   | NM_006387      | 37                               | 1.18                       | 5.64                       | 4.26                       | -1.37                      | -1.61                      | -1.34                      | 5.16                       | 22.23                      | 13.48                      | 11.08                       | -4.32                  | 40.87                  | 3.6                    |
| 57185       | 57185   | NM_020427      | 38                               | 3.81                       | 4.59                       | 6.11                       | -1.57                      | -1.69                      | -1.61                      | 12.07                      | 14.59                      | 6.22                       | 15.92                       | -5.33                  | 40.77                  | 3.6                    |
| FZL1        | 51343   | NM_012623      | 39                               | 5.49                       | 3.72                       | 3.46                       | -1.75                      | -2.21                      | -1.52                      | 19.21                      | 13.16                      | 7.10                       | 10.21                       | -5.48                  | 39.48                  | 3.6                    |
| LZTSL2      | 84445   | NM_032429      | 40                               | 5.58                       | 10.20                      | 3.86                       | -0.70                      | -1.05                      | -0.92                      | 10.75                      | 21.50                      | 6.72                       | 19.64                       | -2.67                  | 38.96                  | 3.6                    |
| RAP1A       | 5908    | NM_002884      | 41                               | 9.80                       | 5.64                       | 7.62                       | -0.34                      | 0.80                       | 0.76                       | 22.01                      | 8.28                       | 8.49                       | 22.87                       | 1.22                   | 38.77                  | 3.6                    |
| SIRT7       | 22583   | NM_036093      | 42                               | 1.85                       | 1.98                       | 1.64                       | -1.88                      | -1.80                      | -1.80                      | 14.43                      | 10.28                      | 13.84                      | 5.46                        | -5.72                  | 37.55                  | 3.6                    |
| UNC13D      | 201294  | NM_199242      | 43                               | 10.41                      | 6.59                       | 4.59                       | -0.80                      | -0.98                      | -1.15                      | 16.25                      | 11.52                      | 10.39                      | 21.59                       | -2.93                  | 38.17                  | 3.6                    |
| ARME1       | 7873    | NM_006010      | 44                               | 3.45                       | 4.15                       | 2.55                       | -2.02                      | -2.00                      | -1.94                      | 14.98                      | 12.27                      | 9.40                       | 10.15                       | -5.97                  | 37.65                  | 3.6                    |
| MGC55558    | 22982   | NM_005513      | 45                               | 5.74                       | 8.82                       | 5.44                       | -1.82                      | -0.81                      | -0.81                      | 11.26                      | 11.04                      | 15.52                      | 26.11                       | -3.89                  | 37.11                  | 3.6                    |
| MGC552      | 3158    | NM_005518      | 46                               | 3.22                       | 2.58                       | 2.78                       | -1.73                      | -1.31                      | -1.62                      | 15.92                      | 7.68                       | 13.35                      | 8.59                        | -4.65                  | 36.95                  | 3.6                    |
| ANKK4       | 307     | NM_001153      | 47                               | 4.17                       | 3.61                       | 3.26                       | -1.77                      | -1.86                      | -2.03                      | 13.10                      | 12.44                      | 12.75                      | 11.04                       | -5.66                  | 36.49                  | 3.6                    |
| ARHG7       | 5457    | NM_000795      | 48                               | 6.47                       | 2.54                       | 3.07                       | -0.57                      | -0.77                      | -0.68                      | 13.27                      | 13.88                      | 10.07                      | 7.87                        | -4.70                  | 36.11                  | 3.6                    |
| NUD10D      | 170685  | NM_153183      | 49                               | -0.47                      | 6.91                       | 6.86                       | -2.35                      | -2.00                      | -1.43                      | 4.54                       | 21.15                      | 10.05                      | 13.10                       | -5.78                  | 35.75                  | 3.6                    |
| TMPP3       | 7078    | NM_000362      | 50                               | 5.04                       | 8.34                       | 6.37                       | -1.60                      | -1.11                      | -0.34                      | 11.96                      | 17.80                      | 5.93                       | 19.74                       | -3.05                  | 35.69                  | 3.6                    |
| FGF11       | 2256    | NM_004412      | 51                               | 5.39                       | 4.31                       | 9.01                       | -1.32                      | -1.70                      | -0.73                      | 12.32                      | 10.52                      | 12.70                      | 18.71                       | -3.75                  | 35.54                  | 3.6                    |
| TMEM60      | 106655  | NM_152020      | 52                               | 3.78                       | 2.43                       | 4.69                       | -1.43                      | -1.63                      | -1.43                      | 7.33                       | 16.66                      | 11.50                      | 10.30                       | -4.56                  | 35.07                  | 3.6                    |
| OR5R1       | 219479  | NM_01004744    | 53                               | 2.53                       | 8.64                       | 2.27                       | -1.70                      | -1.46                      | -1.01                      | 7.76                       | 2.20                       | 6.04                       | 13.44                       | -4.17                  | 35.00                  | 3.6                    |
| LOC123169   | 123169  | NM_138792      | 54                               | 3.43                       | 5.49                       | 2.47                       | -1.59                      | -1.89                      | -1.54                      | 12.61                      | 15.26                      | 7.02                       | 11.38                       | -5.02                  | 34.89                  | 3.6                    |
| MIRNA       | 2315    | NM_005511      | 55                               | 10.26                      | 6.28                       | 11.11                      | -1.28                      | -1.58                      | -1.67                      | 24.69                      | 6.25                       | 3.78                       | 15.74                       | -2.95                  | 34.77                  | 3.6                    |
| RP3         | 5983    | NM_181558      | 56                               | 5.94                       | 5.33                       | 6.34                       | -0.55                      | -0.84                      | -0.98                      | 12.87                      | 8.19                       | 13.12                      | 17.61                       | -2.38                  | 34.18                  | 3.6                    |
| KIF23       | 192666  | NM_019016      | 57                               | 3.49                       | 5.40                       | 3.01                       | -1.90                      | -1.45                      | -2.10                      | 10.74                      | 9.30                       | 14.12                      | 11.90                       | -5.45                  | 34.16                  | 3.6                    |
| HLF4N       | 55650   | NM_001902      | 58                               | 8.76                       | 6.68                       | 8.00                       | -1.72                      | -1.08                      | -0.93                      | 18.10                      | 8.55                       | 7.63                       | 23.45                       | -3.85                  | 34.03                  | 3.6                    |
| FUT1        | 2222    | NM_004462      | 59                               | 0.93                       | 5.99                       | 1.90                       | -1.98                      | -2.41                      | -1.01                      | 7.60                       | 17.94                      | 8.00                       | 4.11                        | -6.40                  | 33.60                  | 3.6                    |
| TNND6       | 347736  | NM_178130      | 60                               | 4.28                       | 1.83                       | 3.98                       | -1.88                      | -1.82                      | -1.95                      | 13.03                      | 6.66                       | 13.66                      | 10.10                       | -5.64                  | 33.34                  | 3.6                    |
| CAMK1       | 8536    | NM_003656      | 61                               | 4.35                       | 5.46                       | 1.88                       | -1.80                      | -1.20                      | -1.59                      | 15.70                      | 10.87                      | 6.70                       | 11.68                       | -4.38                  | 33.29                  | 3.6                    |
| SNR2        | 6645    | NM_001945      | 62                               | 4.72                       | 4.99                       | 1.13                       | -1.25                      | -1.78                      | -1.78                      | 10.42                      | 13.63                      | 11.99                      | 14.85                       | -4.86                  | 33.08                  | 3.6                    |
| KIF24P10-10 | 353333  | NM_181688      | 63                               | 2.77                       | 2.69                       | 2.99                       | -2.02                      | -1.88                      | -2.27                      | 14.49                      | 8.72                       | 9.86                       | 8.45                        | -6.17                  | 33.07                  | 3.6                    |
| SFRS1       | 6426    | NM_009024      | 64                               | 1.37                       | 2.37                       | 0.15                       | -2.17                      | -2.78                      | -2.04                      | 12.38                      | 17.06                      | 3.50                       | 3.89                        | -7.00                  | 32.94                  | 3.6                    |
| HLH2        | 8346    | NM_001234      | 65                               | 6.56                       | 6.03                       | 2.68                       | -1.56                      | -1.03                      | -1.66                      | 8.14                       | 6.85                       | 11.30                      | 14.85                       | -4.86                  | 32.97                  | 3.6                    |
| PEX6        | 5190    | NM_000287      | 66                               | 4.77                       | 3.43                       | 2.81                       |                            |                            |                            |                            |                            |                            |                             |                        |                        |                        |

|            |        |              |     |       |       |       |       |       |       |       |       |       |       |       |       |
|------------|--------|--------------|-----|-------|-------|-------|-------|-------|-------|-------|-------|-------|-------|-------|-------|
| ZNF596     | 169270 | NM_173539    | 155 | 3.00  | 3.02  | 2.38  | -1.27 | -1.36 | -1.42 | 7.99  | 10.21 | 6.29  | 8.40  | -4.05 | 24.49 |
| SHGL1      | 6485   | NM_005025    | 156 | 2.22  | 1.95  | 1.78  | -1.54 | -1.36 | -1.97 | 5.52  | 7.24  | 11.70 | 5.99  | -5.58 | 24.45 |
| GAK        | 2580   | NM_005535    | 157 | 3.18  | 2.24  | 4.85  | -0.86 | -0.92 | -0.44 | 6.55  | 11.40 | 6.50  | 13.17 | -2.21 | 24.45 |
| MAFG       | 4097   | NM_032711    | 158 | 2.16  | 2.80  | 1.38  | -1.26 | -1.80 | -1.22 | 4.98  | 12.76 | 6.71  | 6.33  | -4.28 | 24.45 |
| ORJ2       | 26707  | NM_030905    | 159 | 1.06  | 5.56  | 1.25  | -1.79 | -2.61 | -1.63 | 4.74  | 13.52 | 6.11  | 7.88  | -6.03 | 24.38 |
| GNR2       | 81492  | NM_026784    | 160 | 8.24  | 6.98  | 4.64  | -0.42 | -0.04 | -0.42 | 8.91  | 10.08 | 5.37  | 19.36 | -0.71 | 24.36 |
| TIGD7      | 91151  | NM_032028    | 161 | 4.67  | 5.14  | 4.89  | -0.93 | -1.00 | -0.71 | 8.02  | 8.99  | 7.34  | 14.71 | -2.64 | 24.35 |
| LOC133957  | 133957 | NM_145265    | 162 | 3.37  | 3.38  | 4.07  | -1.49 | -1.58 | -0.79 | 6.04  | 11.47 | 6.82  | 11.42 | -3.87 | 24.34 |
| KC1        | 9886   | NM_02032279  | 163 | 7.85  | 13.32 | 6.08  | -0.62 | -0.93 | -1.63 | 10.06 | 6.98  | 7.27  | 17.25 | -1.83 | 24.31 |
| DKFZ434614 | 83448  | NM_00198614  | 164 | 5.37  | 3.84  | 3.18  | -1.00 | -0.70 | -1.36 | 10.80 | 2.20  | 7.19  | 12.39 | -1.07 | 24.30 |
| PATE       | 160605 | NM_138294    | 165 | 9.70  | 4.45  | 4.01  | -0.93 | -0.65 | 0.38  | 13.69 | 8.09  | 2.47  | 18.15 | -1.21 | 24.25 |
| NFB        | 4810   | NM_016166    | 166 | 5.46  | 2.69  | 1.74  | -1.60 | -1.60 | -0.65 | 8.65  | 6.40  | 7.59  | 6.40  | -5.04 | 24.25 |
| NAAG317    | 9870   | NM_014821    | 167 | 9.45  | 4.44  | 2.54  | -1.45 | -0.77 | -1.30 | 11.24 | 7.31  | 5.69  | 13.42 | -3.52 | 24.24 |
| ABCC1      | 4363   | NM_019899    | 168 | 1.53  | 4.55  | -0.80 | -2.35 | -1.95 | 1.35  | 9.25  | 15.43 | 0.46  | 5.29  | -2.95 | 24.23 |
| CABIN1     | 23523  | NM_012195    | 169 | 3.96  | 4.78  | 5.96  | -2.12 | -1.22 | -0.10 | 4.73  | 9.58  | 9.74  | 14.70 | 0.80  | 24.06 |
| HTR2       | 3356   | NM_000621    | 170 | 5.21  | 3.95  | 1.95  | -1.11 | -1.37 | -1.63 | 8.68  | 9.69  | 5.67  | 11.11 | -4.10 | 24.04 |
| AFPOD1     | 147495 | NM_153000    | 171 | 1.26  | 5.19  | 5.10  | -0.59 | -1.19 | -0.69 | 1.18  | 12.19 | 10.67 | 11.55 | -2.75 | 24.04 |
| AMAC12     | 83650  | NM_054028    | 172 | 3.48  | 1.40  | 4.10  | -1.66 | -2.03 | -1.62 | 7.16  | 8.67  | 8.17  | 8.98  | -5.32 | 23.99 |
| FLJ20516   | 54962  | NM_017658    | 173 | 8.93  | 5.40  | 4.71  | -0.09 | -0.91 | -0.45 | 9.97  | 8.31  | 5.69  | 19.04 | 1.45  | 23.97 |
| FCGR2A     | 2212   | NM_021642    | 174 | 2.49  | 2.24  | 2.31  | -1.57 | -1.64 | -1.21 | 7.49  | 10.59 | 5.81  | 7.04  | -4.42 | 23.89 |
| UBE2L3     | 7332   | NM_003347    | 175 | 2.38  | 0.18  | 0.84  | -2.33 | -2.14 | -2.17 | 13.62 | 5.11  | 5.11  | 3.40  | -6.66 | 23.84 |
| SLC7A4     | 6545   | NM_001473    | 176 | 1.46  | 2.44  | 0.75  | -1.90 | -1.71 | -1.88 | 7.87  | 9.67  | 6.22  | 6.22  | -5.29 | 23.76 |
| USP38      | 84640  | NM_032557    | 177 | 9.63  | 5.13  | 4.76  | 0.64  | -0.72 | 1.15  | 12.72 | 6.16  | 4.88  | 19.55 | 1.06  | 23.76 |
| PARR2      | 10038  | NM_005484    | 178 | 3.56  | 1.93  | 1.73  | -2.44 | -1.82 | -1.65 | 11.36 | 6.76  | 5.60  | 7.22  | -5.90 | 23.71 |
| LPHN2      | 23366  | NM_021202    | 179 | 0.90  | 3.18  | 6.09  | -1.06 | -1.61 | -1.99 | 0.97  | 13.90 | 10.71 | 10.18 | -4.26 | 23.57 |
| RRM10      | 804    | NM_022656    | 180 | 2.21  | 4.40  | 2.96  | -1.19 | -1.42 | -1.41 | 5.42  | 10.67 | 7.47  | 9.57  | -4.02 | 23.56 |
| MITF       | 4286   | NM_198158    | 181 | 2.50  | 2.31  | 2.04  | -1.62 | -1.55 | -0.82 | 7.19  | 12.03 | 4.30  | 6.85  | -3.99 | 23.52 |
| STK16      | 8576   | NM_01008910  | 182 | 1.89  | 1.96  | 1.86  | -2.38 | -2.05 | -1.68 | 9.72  | 7.70  | 6.07  | 5.71  | -1.10 | 23.49 |
| DDI1       | 165    | NM_01008910  | 183 | 2.68  | 1.83  | 1.44  | -1.95 | -1.95 | -1.95 | 12.26 | 5.26  | 5.96  | 5.96  | -2.31 | 23.45 |
| UCY9       | 4589   | NM_152291    | 184 | 5.35  | 6.94  | 2.25  | -0.77 | -0.51 | -1.22 | 9.78  | 9.75  | 3.92  | 14.53 | -2.51 | 23.45 |
| FRA2       | 2395   | NM_000144    | 185 | 3.27  | 2.62  | 1.85  | -1.08 | -1.21 | -1.67 | 7.37  | 8.44  | 7.62  | 7.79  | -3.96 | 23.44 |
| TNFR2      | 2484   | NM_000144    | 186 | 2.22  | 2.68  | 1.57  | -1.71 | -2.04 | -1.71 | 4.53  | 10.71 | 8.77  | 6.58  | -5.90 | 23.40 |
| SDTB1      | 9869   | NM_012432    | 187 | 1.49  | 1.73  | 1.75  | -1.87 | -1.57 | -1.75 | 7.05  | 9.28  | 7.04  | 6.96  | -5.18 | 23.37 |
| HSPAB8     | 3313   | NM_004134    | 188 | 0.30  | 1.55  | 1.38  | -1.82 | -2.47 | -1.97 | 5.11  | 8.71  | 9.52  | 3.24  | -6.25 | 23.34 |
| FLJ09H1    | 57475  | NM_020715    | 189 | 7.03  | 11.88 | 3.44  | -0.63 | 0.08  | -0.38 | 8.98  | 10.36 | 4.00  | 22.35 | -0.93 | 23.34 |
| PCX1       | 189    | NM_016664    | 190 | 4.84  | 9.11  | 3.36  | -1.21 | -0.91 | -1.21 | 7.11  | 6.70  | 9.47  | 19.31 | -3.36 | 23.29 |
| EGLF3      | 1953   | NM_001409    | 191 | 7.98  | 3.51  | 3.25  | -1.29 | -1.01 | -0.76 | 13.00 | 5.01  | 5.21  | 14.75 | -3.06 | 23.21 |
| FLJ2949    | 28347  | NM_173812    | 192 | 12.03 | 5.13  | 6.51  | -0.44 | -0.92 | -0.94 | 10.63 | 5.32  | 7.23  | 23.67 | -2.30 | 23.18 |
| LAMA1      | 28417  | NM_005559    | 193 | 5.56  | 1.79  | 1.17  | -1.82 | -1.17 | -1.82 | 11.17 | 5.12  | 6.17  | 14.52 | -3.99 | 23.18 |
| RRM2       | 6241   | NM_010484    | 194 | 2.55  | 6.36  | 5.97  | -2.06 | -1.53 | -2.03 | 4.88  | 8.93  | 9.27  | 14.88 | -5.61 | 23.08 |
| JRRC3      | 55144  | NM_018103    | 195 | 6.35  | 5.01  | 2.49  | -1.90 | -1.50 | -1.49 | 10.12 | 6.95  | 5.97  | 13.86 | -4.89 | 23.03 |
| FLJ10375   | 55228  | NM_018103    | 196 | 6.35  | 5.01  | 3.11  | -1.54 | -1.01 | -1.01 | 10.12 | 6.95  | 5.97  | 13.86 | -4.89 | 23.03 |
| TLE1       | 7987   | NM_005077    | 197 | 2.69  | 0.73  | 1.54  | -2.40 | -1.54 | -1.65 | 13.38 | 3.51  | 6.12  | 4.96  | -5.60 | 23.01 |
| GSX8       | 2932   | NM_002093    | 198 | 1.62  | 3.53  | 0.75  | -1.78 | -2.33 | -1.90 | 8.34  | 11.17 | 3.47  | 5.89  | -6.01 | 22.98 |
| WDR4       | 10795  | NM_013661    | 199 | 8.32  | 5.88  | 5.34  | 0.20  | 0.12  | 0.14  | 11.88 | 5.17  | 5.92  | 19.54 | 0.47  | 22.97 |
| WDR2       | 15382  | NM_033027    | 200 | 5.49  | 0.49  | 1.54  | -1.64 | -1.64 | -1.64 | 9.01  | 9.12  | 4.83  | 10.21 | -3.84 | 22.96 |
| CL10RF13   | 8045   | NM_003475    | 201 | 2.66  | 1.45  | 1.94  | -2.17 | -2.36 | -1.71 | 8.92  | 9.06  | 4.90  | 6.05  | -8.23 | 22.88 |
| HEPH       | 9843   | NM_014799    | 202 | 6.17  | 1.08  | 0.75  | -1.16 | -0.39 | -0.29 | 16.10 | 5.01  | 1.76  | 8.00  | -1.85 | 22.87 |
| USP5WJ5E   | 2725   | NM_017072    | 203 | 2.25  | 2.07  | 2.17  | -1.87 | -1.87 | -1.87 | 7.87  | 2.18  | 2.18  | 6.13  | -6.13 | 22.84 |
| CDYL       | 9425   | NM_170752    | 204 | 4.63  | 3.15  | 2.29  | -1.88 | -1.30 | -1.48 | 11.46 | 5.56  | 5.82  | 10.08 | -4.66 | 22.84 |
| RCGA       | 56963  | NM_020211    | 205 | 1.17  | 1.27  | 1.84  | -1.90 | -3.08 | -1.76 | 4.08  | 10.90 | 7.81  | 4.27  | -6.74 | 22.79 |
| RAD9A      | 589    | NM_004584    | 206 | 0.60  | 6.46  | 6.46  | -4.17 | -6.46 | -4.17 | 6.46  | 6.46  | 6.46  | 6.46  | -2.58 | 22.63 |
| CA9        | 768    | NM_001216    | 207 | 0.17  | 1.81  | 1.95  | -1.60 | -1.55 | -1.22 | 3.83  | 9.74  | 9.05  | 3.83  | -4.37 | 22.61 |
| TAS2B48    | 25934  | NM_176888    | 208 | 2.86  | 5.27  | 4.44  | -0.76 | -0.53 | -0.76 | 3.90  | 8.33  | 10.38 | 12.58 | -2.04 | 22.61 |
| CRF2       | 64109  | NM_0012288   | 209 | -0.19 | 0.76  | 0.00  | -2.62 | -2.92 | -2.11 | 5.55  | 10.77 | 6.19  | 0.57  | -7.65 | 22.51 |
| FLJ8281    | 163892 | NM_176801    | 210 | 4.51  | 1.39  | 1.10  | -1.35 | -1.08 | -1.35 | 6.64  | 6.64  | 7.56  | 17.01 | -0.14 | 22.51 |
| CYBB       | 1536   | NM_000937    | 211 | 2.48  | 3.27  | 2.38  | -1.05 | -1.18 | -1.09 | 1.92  | 6.84  | 13.69 | 8.13  | -9.22 | 22.45 |
| FUT6       | 2528   | NM_000150    | 212 | 2.88  | 2.73  | 1.55  | -0.56 | -1.37 | -1.20 | 6.21  | 8.84  | 7.30  | 7.15  | -1.19 | 22.35 |
| DR2A       | 484    | NM_012392    | 213 | 1.20  | 1.60  | 1.28  | -1.46 | -1.28 | -1.46 | 6.59  | 7.5   | 8.40  | 8.18  | -3.94 | 22.31 |
| CATSFR1    | 11744  | NM_035054    | 214 | 1.67  | 6.36  | 3.96  | -0.62 | -0.57 | -1.04 | 2.81  | 11.50 | 7.99  | 12.02 | -1.64 | 22.30 |
| FLJ0074    | 55681  | NM_017988    | 215 | 8.01  | 5.97  | 3.04  | -0.62 | -0.14 | -0.82 | 13.24 | 5.29  | 3.77  | 17.02 | -1.57 | 22.29 |
| FLJ2518    | 14679  | NM_173503    | 216 | 6.53  | 2.49  | 3.79  | -1.15 | -1.48 | -1.15 | 7.56  | 6.56  | 8.16  | 9.80  | -3.79 | 22.21 |
| GPC3       | 2719   | NM_004484    | 217 | 10.04 | 10.00 | 4.33  | -0.41 | 0.18  | -0.52 | 7.88  | 8.12  | 6.26  | 24.87 | -0.75 | 22.26 |
| LOC201895  | 201895 | NM_174921    | 218 | 1.88  | 2.39  | 1.39  | -1.91 | -2.09 | -0.93 | 11.24 | 7.49  | 5.67  | 5.67  | -4.93 | 22.20 |
| HWG81      | 3348   | NM_005342    | 219 | 2.63  | 7.78  | 6.83  | -0.23 | -0.17 | -0.54 | 5.82  | 9.33  | 7.01  | 20.84 | -0.94 | 22.22 |
| LOC20522   | 9002   | NM_00199671  | 220 | 2.55  | 2.40  | 2.55  | -1.13 | -1.58 | -1.13 | 4.81  | 11.86 | 4.81  | 11.86 | -3.99 | 22.09 |
| ATP9B12    | 526    | NM_001693    | 221 | 1.90  | 2.35  | 0.96  | -2.15 | -1.83 | -1.99 | 6.52  | 8.16  | 7.40  | 5.21  | -5.97 | 22.08 |
| PPP        | 4026   | NM_005758    | 222 | 4.58  | 3.52  | 2.31  | -0.37 | -0.74 | -1.02 | 4.05  | 11.28 | 6.73  | 10.41 | -1.38 | 22.06 |
| 8415       | 1028   | NM_021019    | 223 | 1.24  | 1.09  | 1.89  | -1.88 | -1.88 | -1.88 | 10.76 | 6.85  | 6.85  | 3.28  | -3.25 | 22.03 |
| GNP3       | 2827   | NM_005281    | 224 | 0.00  | 4.05  | 2.36  | -1.34 | -2.18 | -1.76 | 4.15  | 11.46 | 6.38  | 6.41  | -5.27 | 21.99 |
| MOBK1B     | 55233  | NM_018221    | 225 | 2.26  | 2.09  | 6.68  | -1.92 | -1.10 | -0.30 | 1.91  | 6.87  | 13.20 | 11.22 | -3.31 | 21.99 |
| ITIH4      | 10184  | NM_004611    | 226 | 2.47  | 2.26  | 2.56  | -0.76 | -1.24 | -0.60 | 7.47  | 6.00  | 7.47  | 6.00  | -0.76 | 21.95 |
| GLI3       | 2707   | NM_001005752 | 227 | 0.79  | 4.05  | -0.14 | -1.66 | -1.22 | -0.86 | 5.71  | 15.86 | 0.38  | 4.70  | -1.46 | 21.94 |
| OR6G68     | 403284 | NM_01005519  | 228 | 4.18  | 4.28  | 2.28  | -1.22 | -1.04 | -1.79 | 9.94  | 8.11  | 3.88  | 7.14  | -3.05 | 21.94 |
| CLSN       | 63967  | NM_022111    | 229 | 1.13  | 2.33  | 5.49  | -1.27 | -1.64 | -1.20 | 6.37  | 4.81  | 10.76 | 10.95 | -4.10 | 21.91 |
| GAUC2      | 258    | NM_004044    | 230 | 3.45  | 1.76  | 1.39  | -1.38 | -1.38 | -1.38 | 9.53  | 6.49  | 8.60  | 8.60  | -8.60 | 21.91 |
| KIF3A      | 11127  | NM_007054    | 231 | 6.36  | 6.33  | 3.44  | -0.01 | 0.02  | -1.07 | 7.24  | 8.60  | 6.03  | 16.13 | -1.06 | 21.87 |
| FAM47E     | 16408  | NM_00136570  | 232 | 0.30  | 0.44  | 1.65  | -1.95 | -2.24 | -2.28 | 3.37  | 7.90  | 10.57 | 1.87  | -6.47 | 21.84 |
| FKBP1      | 478    | NM_005156    | 233 | 4.59  | 0.56  | 1.56  | -0.10 | -0.26 | -0.10 | 7.52  | 10.56 | 5.44  | 24.29 | -0.55 | 21.84 |
| STK36      | 27148  | NM_015690    | 234 | 2.44  | 2.02  | 1.87  | -1.64 | -1.54 | -1.22 | 9.01  | 6.80  | 5.64  | 6.33  | -4.40 | 21.45 |

|              |        |              |     |       |       |       |       |       |       |       |       |       |       |       |       |
|--------------|--------|--------------|-----|-------|-------|-------|-------|-------|-------|-------|-------|-------|-------|-------|-------|
| LOC100130958 | 1E408  | NM_001299979 | 317 | 2.04  | 2.32  | 2.21  | -1.06 | -0.92 | -1.10 | 6.63  | 5.99  | 6.45  | 6.58  | -3.09 | 19.06 |
| FNEM93A      | 5515   | NM_001189986 | 318 | 1.60  | 0.13  | 0.56  | 0.24  | -0.41 | -0.50 | -2.84 | 3.89  | 3.23  | 5.81  | 0.81  | -1.12 |
| ITR          | 16089  | NM_180988    | 319 | 3.08  | 2.12  | 2.77  | -1.47 | -1.52 | -1.00 | 8.19  | 6.09  | 4.75  | 7.97  | -3.99 | 19.02 |
| C140RFB0     | 283643 | NM_001134877 | 320 | 3.12  | 0.71  | 1.15  | -0.75 | -1.96 | -2.01 | 7.67  | 3.81  | 7.52  | 4.97  | -4.73 | 18.99 |
| YSARG6       | 374047 | NM_153614    | 321 | 2.56  | 2.57  | 0.51  | -1.47 | -1.65 | -1.30 | 7.73  | 8.56  | 2.57  | 5.64  | -4.21 | 18.86 |
| NC6G2        | 72382  | NM_001021266 | 322 | 5.22  | 2.04  | 4.36  | -0.89 | -1.09 | -0.49 | 4.20  | 9.27  | 3.30  | 9.22  | -1.79 | 18.86 |
| LOC39229     | 339229 | NM_001029842 | 323 | 2.58  | 4.79  | 3.91  | -0.64 | -1.21 | -1.05 | 5.68  | 6.96  | 6.19  | 14.08 | -1.91 | 18.84 |
| UBZ25        | 27338  | NM_014501    | 324 | 2.09  | 1.01  | -0.23 | -1.81 | -2.02 | -2.00 | 5.05  | 9.49  | 4.29  | 0.88  | -5.84 | 18.83 |
| INTT         | 127    | NM_00101614  | 325 | 3.69  | 2.51  | 2.02  | -1.01 | -1.82 | -1.10 | 5.51  | 8.19  | 4.93  | 8.22  | -3.92 | 18.83 |
| ZHHK09       | 51114  | NM_001008222 | 326 | 2.61  | 3.48  | 2.29  | -1.57 | -1.55 | -1.70 | 5.58  | 6.73  | 6.49  | 8.37  | -4.82 | 18.79 |
| GT2A1        | 2957   | NM_201955    | 327 | 4.92  | 0.34  | 1.29  | -1.98 | -2.02 | -1.81 | 11.77 | 3.20  | 3.82  | 6.55  | -5.81 | 18.79 |
| TR1E         | 3154   | NM_00100875  | 328 | 3.88  | 1.87  | 0.39  | 2.51  | -1.84 | -2.04 | 5.89  | 3.27  | 5.85  | 8.75  | -5.85 | 18.75 |
| LOC256394    | 256394 | NM_001080451 | 329 | 3.30  | 4.47  | 4.38  | -0.74 | -0.73 | -1.01 | 5.19  | 6.43  | 7.12  | 11.15 | -2.47 | 18.75 |
| NARFL        | 64428  | NM_0022493   | 330 | 0.84  | 0.81  | 0.35  | -1.99 | -2.13 | -1.72 | 6.11  | 7.37  | 5.20  | 2.00  | -5.84 | 18.68 |
| PF395        | 388446 | NM_001012002 | 331 | 3.13  | 5.27  | 0.78  | -1.50 | -1.29 | -1.23 | 7.41  | 7.95  | 3.31  | 9.16  | -4.00 | 18.68 |
| MAR2         | 84458  | NM_0032440   | 332 | 3.69  | 2.51  | 2.02  | -1.01 | -1.82 | -1.10 | 5.51  | 8.19  | 4.93  | 8.22  | -3.92 | 18.63 |
| LOC348158    | 348158 | NM_182617    | 333 | 7.26  | 3.31  | 3.58  | -0.25 | -0.33 | -0.19 | 8.72  | 5.23  | 4.69  | 14.14 | -0.77 | 18.63 |
| MHG9         | 3029   | NM_005236    | 334 | 2.85  | 2.14  | 2.68  | -0.96 | -0.35 | -2.54 | 6.62  | 5.35  | 6.65  | 7.67  | -3.85 | 18.62 |
| APP          | 350    | NM_00105122  | 335 | 3.29  | 3.04  | 2.77  | -1.32 | -1.80 | -1.68 | 5.46  | 6.53  | 6.63  | 9.20  | -4.79 | 18.62 |
| LOC284123    | 284123 | NM_203392    | 336 | 3.15  | 2.67  | 2.87  | -0.36 | -0.58 | -1.00 | 6.80  | 6.22  | 5.59  | 8.70  | -1.94 | 18.61 |
| GABR82       | 2570   | NM_002043    | 337 | 4.24  | 3.82  | 2.52  | -0.99 | -0.82 | -0.44 | 7.39  | 7.16  | 4.07  | 10.58 | -2.25 | 18.61 |
| KRTAP7-7     | 440950 | NM_001012503 | 338 | 0.32  | 0.67  | 1.04  | -2.06 | -1.84 | -2.52 | 2.65  | 2.06  | 13.88 | 2.03  | -6.42 | 18.61 |
| KRTA11       | 3881   | NM_0020277   | 339 | 6.06  | 6.37  | 4.25  | -0.51 | 0.45  | -0.38 | 7.51  | 3.99  | 7.05  | 16.68 | -0.44 | 18.55 |
| FLU42526     | 222194 | NM_198467    | 340 | 2.91  | 0.92  | 5.58  | -0.45 | -0.56 | -1.04 | 5.34  | 1.88  | 11.31 | 9.41  | -2.05 | 18.53 |
| LOC649494    | 649494 | NM_001080521 | 341 | 6.52  | 4.61  | 4.39  | -1.19 | -1.01 | -0.76 | 7.46  | 6.63  | 4.43  | 15.53 | -2.96 | 18.52 |
| HCFC1        | 3054   | NM_000334    | 342 | 1.88  | 0.10  | 0.56  | -2.17 | -2.31 | -1.82 | 9.99  | 4.29  | 4.23  | 2.54  | -6.30 | 18.52 |
| KIA1553      | 57673  | NM_093663    | 343 | 1.03  | 2.68  | 2.00  | -1.67 | -1.84 | -1.54 | 4.35  | 11.10 | 3.06  | 5.72  | -5.04 | 18.51 |
| OKP2         | 135948 | NM_001060485 | 344 | 2.48  | 2.87  | 1.67  | -1.41 | -1.60 | -1.23 | 8.51  | 6.63  | 3.32  | 7.03  | -4.24 | 18.46 |
| SRFR92       | 939    | NM_0010774   | 345 | 1.31  | 1.20  | 1.79  | -1.77 | -1.79 | -1.77 | 6.44  | 5.47  | 6.66  | 5.30  | -5.70 | 18.45 |
| LOC54        | 54512  | NM_0105037   | 346 | 4.84  | 2.63  | 2.35  | -2.09 | -1.12 | -1.34 | 10.64 | 4.06  | 3.73  | 9.82  | -4.55 | 18.43 |
| MDK          | 4152   | NM_002291    | 347 | 6.77  | 4.17  | 8.08  | -0.70 | 0.95  | 0.20  | 5.99  | 3.03  | 9.32  | 19.02 | 1.86  | 18.33 |
| TSRAN15      | 2625   | NM_00108465  | 348 | 3.88  | 2.67  | 2.98  | -0.65 | -0.57 | -0.67 | 8.32  | 5.10  | 4.67  | 12.04 | -0.95 | 18.32 |
| MGC29806     | 201235 | NM_144999    | 349 | 1.61  | 4.46  | 1.13  | -1.94 | -2.37 | -1.31 | 4.67  | 10.94 | 2.71  | 7.21  | -5.61 | 18.32 |
| WBCS28       | 135886 | NM_182504    | 350 | 5.47  | 4.03  | 1.89  | -0.87 | -0.23 | -1.47 | 9.22  | 4.25  | 4.84  | 11.39 | -2.57 | 18.31 |
| RSU1         | 6251   | NM_152724    | 351 | 4.40  | 2.54  | 3.53  | -1.17 | -1.53 | -1.39 | 5.93  | 5.61  | 6.74  | 10.47 | -4.09 | 18.29 |
| APL          | 949    | NM_0000078   | 352 | 4.12  | 4.83  | 3.68  | -1.86 | -1.48 | -0.68 | 6.28  | 5.60  | 4.48  | 6.28  | -3.44 | 18.29 |
| SEZ6         | 124925 | NM_001098335 | 353 | 5.71  | 2.85  | 3.04  | -1.35 | -1.77 | -1.47 | 7.03  | 5.99  | 5.27  | 11.60 | -4.59 | 18.28 |
| NKTR         | 4820   | NM_005385    | 354 | 0.22  | 0.83  | 0.31  | -1.58 | -1.68 | -1.68 | 4.04  | 6.80  | 7.45  | 0.92  | -4.95 | 18.28 |
| PP2F26       | 568    | NM_0010388   | 355 | 2.20  | 1.54  | 5.00  | -1.32 | -1.54 | -1.50 | 8.24  | 3.73  | 3.73  | 5.64  | -4.48 | 18.27 |
| PP2R58       | 5526   | NM_006244    | 356 | 2.75  | 3.56  | 4.48  | 0.11  | -0.36 | -0.25 | 3.89  | 7.11  | 7.27  | 10.78 | -5.00 | 18.27 |
| POJ9F3       | 5455   | NM_006236    | 357 | 3.93  | -0.12 | 4.66  | -1.74 | -0.27 | -0.69 | 8.38  | 4.14  | 5.75  | 8.47  | -2.71 | 18.27 |
| SCA2         | 6513   | NM_00102158  | 358 | 1.27  | 1.30  | 1.27  | -0.76 | -0.76 | -0.76 | 7.24  | 1.37  | 7.92  | 5.94  | -5.49 | 18.27 |
| MS49E        | 245802 | NM_139249    | 359 | 1.82  | 3.36  | 2.68  | -0.64 | -0.36 | -1.97 | 5.02  | 5.90  | 7.80  | 8.86  | -2.27 | 18.21 |
| FZ05         | 7855   | NM_003468    | 360 | -0.26 | 2.06  | 3.92  | -1.97 | -1.81 | -1.68 | 2.86  | 7.41  | 7.92  | 5.72  | -5.46 | 18.18 |
| LOC394943    | 394943 | NM_198137    | 361 | 4.13  | 2.88  | 1.03  | -1.40 | -1.26 | -0.87 | 10.02 | 5.65  | 2.49  | 7.84  | -1.53 | 18.18 |
| LOC553404    | 653404 | NM_00108476  | 362 | 3.37  | 3.88  | 4.71  | -0.87 | -0.86 | -0.77 | 4.81  | 9.22  | 4.81  | 9.81  | -3.63 | 18.15 |
| ABCC10       | 89845  | NM_033450    | 363 | 3.43  | 2.56  | 1.58  | -1.39 | -1.63 | -1.17 | 6.20  | 7.13  | 4.81  | 7.57  | -1.49 | 18.14 |
| HPSP98P1     | 54972  | NM_178931    | 364 | 2.86  | 3.16  | 1.87  | -0.88 | -0.82 | -1.35 | 5.67  | 6.36  | 6.07  | 7.69  | -3.05 | 18.10 |
| SFRN2        | 512    | NM_0010946   | 365 | 3.13  | 1.76  | 1.74  | -1.07 | -1.07 | -1.07 | 2.14  | 1.53  | 1.74  | 2.14  | -2.61 | 18.08 |
| GALNT2       | 2590   | NM_004481    | 366 | 2.65  | 1.46  | 2.91  | -1.33 | -1.76 | -1.60 | 6.85  | 4.47  | 6.72  | 7.22  | -4.69 | 18.03 |
| SLC35B4      | 84912  | NM_032826    | 367 | 4.71  | 3.51  | 2.90  | -0.56 | 0.49  | 0.13  | 8.93  | 4.42  | 4.65  | 11.12 | 0.05  | 18.01 |
| ESD          | 2089   | NM_0010084   | 368 | 3.68  | 1.27  | 1.87  | -2.53 | -2.53 | -2.53 | 11.27 | 1.87  | 2.53  | 11.27 | -1.87 | 18.01 |
| FBP8P1       | 57326  | NM_0020524   | 369 | 1.29  | 1.41  | 1.33  | -1.84 | -2.14 | -1.54 | 6.27  | 7.54  | 4.12  | 8.93  | -5.53 | 17.93 |
| ORX05        | 3215   | NM_002147    | 370 | 2.96  | 3.46  | 5.20  | -0.42 | -0.66 | -1.18 | 3.53  | 5.45  | 8.86  | 11.62 | -2.26 | 17.84 |
| CHD10        | 138937 | NM_182804    | 371 | 0.72  | 3.92  | 1.92  | -0.81 | -1.25 | -1.43 | 9.37  | 5.30  | 3.35  | 12.86 | -1.46 | 17.82 |
| SNR151       | 119692 | NM_001004558 | 372 | 0.79  | 1.60  | 1.13  | -0.79 | -1.40 | -1.39 | 3.46  | 7.30  | 6.96  | 5.33  | -3.72 | 17.81 |
| POLD3        | 107114 | NM_006691    | 373 | 5.23  | 5.78  | 3.61  | -0.33 | -0.47 | -1.37 | 3.93  | 5.82  | 7.97  | 14.61 | -2.17 | 17.71 |
| SON1D        | 6339   | NM_002978    | 374 | 0.93  | 0.11  | 0.94  | -1.75 | -1.89 | -1.67 | 7.29  | 5.62  | 4.75  | 1.98  | -5.30 | 17.65 |
| SNR152       | 16968  | NM_0010851   | 375 | 4.04  | 1.74  | 1.69  | -1.10 | -1.10 | -1.10 | 5.00  | 3.17  | 3.69  | 9.47  | -2.88 | 17.65 |
| POLR1B       | 84172  | NM_019014    | 376 | 2.29  | 0.47  | 0.44  | -1.68 | -1.77 | -1.61 | 9.53  | 4.30  | 3.77  | 3.19  | -5.06 | 17.60 |
| IL13RC       | 84818  | NM_153463    | 377 | 3.78  | 2.61  | 2.81  | -1.45 | -1.43 | -0.80 | 6.20  | 7.06  | 4.34  | 8.46  | -3.67 | 17.59 |
| DNM15        | 1855   | NM_0012358   | 378 | 4.53  | -0.47 | 0.17  | -1.65 | -2.04 | -2.16 | 4.36  | 5.45  | 6.66  | -0.84 | -0.03 | 17.58 |
| SPAG4L       | 140732 | NM_080675    | 379 | 5.60  | 2.57  | 2.76  | -0.97 | -1.12 | -0.99 | 6.93  | 4.36  | 6.26  | 10.94 | -3.07 | 17.55 |
| INF533       | 151126 | NM_152520    | 380 | 3.30  | 3.04  | 1.97  | -1.40 | -1.12 | -1.52 | 7.65  | 5.73  | 4.16  | 8.31  | -4.04 | 17.55 |
| RFCL         | 5981   | NM_002919    | 381 | 6.73  | 2.97  | 3.43  | -0.92 | -1.07 | -1.22 | 6.92  | 4.57  | 6.00  | 12.73 | -3.21 | 17.49 |
| CD44         | 2317   | NM_0010174   | 382 | 3.58  | 0.88  | 1.29  | -1.33 | -1.53 | -1.53 | 4.35  | 4.66  | 3.43  | 3.74  | -5.28 | 17.44 |
| CGI-128      | 51647  | NM_010602    | 383 | 0.79  | 1.00  | 1.09  | -1.63 | -1.42 | -1.74 | 4.19  | 5.20  | 8.03  | 2.88  | -4.80 | 17.43 |
| SLC12A8      | 84561  | NM_024628    | 384 | 3.74  | 5.60  | 2.85  | -1.03 | -0.99 | -0.69 | 6.77  | 6.69  | 3.92  | 12.19 | -2.71 | 17.38 |
| NDUF         | 1091   | NM_0010236   | 385 | 3.01  | 1.95  | 2.12  | -1.06 | -1.06 | -1.06 | 5.96  | 5.96  | 6.00  | 7.18  | -3.76 | 17.38 |
| NDUFA6       | 4700   | NM_002490    | 386 | 1.68  | 3.63  | 3.55  | -1.15 | -1.68 | -1.42 | 1.94  | 8.61  | 6.80  | 8.86  | -4.26 | 17.35 |
| JAT          | 27940  | NM_001014989 | 387 | 2.42  | -0.81 | 0.77  | -1.83 | -1.98 | -2.17 | 7.51  | 1.46  | 8.37  | 2.38  | -5.98 | 17.33 |
| LOC55152     | 14089  | NM_0010152   | 388 | 4.78  | 3.17  | 4.05  | -0.81 | -0.80 | -0.45 | 7.36  | 4.14  | 3.47  | 14.00 | -1.31 | 17.33 |
| PLA2G1B      | 5319   | NM_000928    | 389 | 3.24  | 2.23  | 2.49  | -1.99 | -0.03 | 0.03  | 9.67  | 3.77  | 3.88  | 7.96  | -1.94 | 17.32 |
| IFED         | 8726   | NM_003797    | 390 | 4.90  | 1.31  | 3.49  | -1.58 | -1.76 | -1.26 | 7.79  | 3.60  | 5.89  | 9.70  | -4.60 | 17.29 |
| PTP1S80      | 55374  | NM_018102    | 391 | 3.97  | 11.58 | 4.36  | -0.24 | 0.29  | -0.15 | 3.27  | 9.96  | 4.04  | 19.91 | -4.09 | 17.27 |
| NC92         | 10388  | NM_0010258   | 392 | 3.62  | 5.97  | 1.12  | -0.67 | -0.67 | -0.67 | 4.07  | 3.88  | 3.88  | 3.72  | -2.42 | 17.20 |
| SOX14        | 8403   | NM_004189    | 393 | 3.95  | 1.57  | 2.74  | -1.96 | -0.69 | -0.93 | 9.47  | 2.89  | 4.84  | 8.26  | -3.59 | 17.20 |
| PH42         | 8974   | NM_001019774 | 394 | 1.05  | 1.47  | 0.30  | -1.19 | -1.20 | -1.43 | 6.36  | 5.95  | 4.87  | 2.83  | -3.82 | 17.19 |
| SRPND1       | 285    | NM_0010005   | 395 | 2.46  | 2.51  | 3.94  | -1.02 | -1.02 | -1.02 | 4.59  | 6.85  | 5.91  | 7.66  | -3.61 | 17.19 |
| LOC646424    | 646424 | NM_001080255 | 396 | 2.70  | 3.44  | 3.61  | -0.82 |       |       |       |       |       |       |       |       |

|            |        |              |     |       |       |       |       |       |       |      |       |       |       |       |       |
|------------|--------|--------------|-----|-------|-------|-------|-------|-------|-------|------|-------|-------|-------|-------|-------|
| MSH2       | 4436   | NM_000251    | 479 | 5.34  | 3.20  | 1.08  | -0.63 | -0.38 | -0.83 | 9.84 | 3.66  | 2.21  | 9.62  | -1.34 | 15.71 |
| ACTR1L1    | 1487   | NM_000161    | 480 | 0.78  | 1.46  | 0.58  | -1.24 | -1.39 | -1.89 | 5.29 | 4.19  | 3.21  | 2.91  | -3.75 | -6.53 |
| CARD4      | 10392  | NM_006992    | 481 | 2.12  | 1.43  | 1.23  | -1.90 | -1.04 | -1.55 | 5.70 | 6.01  | 3.95  | 5.80  | 7.77  | 4.49  |
| ENPP7      | 339221 | NM_178543    | 482 | 1.40  | 2.64  | 1.36  | -1.23 | -1.69 | -1.75 | 3.44 | 6.97  | 5.23  | 5.40  | -4.67 | 15.64 |
| ACN1       | 22985  | NM_014977    | 483 | 2.91  | 5.89  | 4.24  | -1.71 | -1.15 | -0.47 | 4.89 | 7.96  | 2.79  | 13.04 | -1.33 | 15.64 |
| MTX1       | 4580   | NM_198883    | 484 | 0.07  | 0.99  | 0.44  | -0.89 | -1.54 | -1.89 | 4.97 | 6.39  | 4.84  | 1.02  | -3.38 | -6.82 |
| NTX        | 60506  | NM_022567    | 485 | 2.33  | 9.60  | 5.22  | 0.58  | -0.58 | -0.71 | 0.05 | 6.68  | 8.88  | 17.15 | -0.71 | 15.60 |
| TH3        | 85360  | NM_039325    | 486 | 2.10  | 1.02  | 2.00  | -1.71 | -1.67 | -1.37 | 6.20 | 3.81  | 5.56  | 5.12  | -4.76 | 15.58 |
| BT4        | 639    | NM_041517    | 487 | 0.02  | 0.63  | 0.01  | -0.56 | -1.72 | -1.99 | 4.56 | 5.72  | 1.62  | 0.66  | -5.87 | 15.57 |
| ADAM10     | 11085  | NM_021794    | 488 | 1.62  | 1.24  | 1.29  | -1.49 | -1.68 | -1.59 | 5.79 | 4.89  | 4.88  | 4.15  | -4.75 | 15.56 |
| OMR2       | 389090 | NM_00105853  | 489 | 0.63  | 0.77  | 1.61  | -1.11 | -2.00 | -2.05 | 2.62 | 4.76  | 8.12  | 3.02  | -5.16 | 15.49 |
| ENF53      | 19740  | NM_000185    | 490 | 4.88  | 4.85  | 4.85  | -0.89 | -0.89 | -0.89 | 5.09 | 4.85  | 5.05  | 14.39 | 0.13  | 15.49 |
| KIAA0992   | 23022  | NM_016081    | 491 | 1.03  | 1.92  | 1.52  | -1.11 | -1.26 | -1.09 | 2.64 | 7.54  | 5.30  | 7.47  | -0.47 | 15.48 |
| UR12M      | 9040   | NM_003969    | 492 | 6.90  | 5.23  | 4.37  | -1.06 | -0.90 | -0.51 | 7.01 | 4.41  | 4.04  | 16.50 | -2.47 | 15.47 |
| BNP3       | 461    | NM_001201    | 493 | 0.83  | 2.88  | 3.53  | -2.12 | -1.38 | -2.34 | 3.77 | 4.34  | 7.30  | 7.24  | -5.84 | 15.41 |
| GNTM       | 27950  | NM_014394    | 494 | 5.39  | 6.20  | 3.58  | -0.96 | -0.44 | -0.21 | 7.69 | 5.06  | 2.64  | 15.17 | -1.62 | 15.39 |
| SUMF1      | 285362 | NM_182760    | 495 | 4.30  | 4.59  | 4.50  | 0.04  | -0.54 | -0.47 | 3.95 | 4.22  | 7.21  | 13.39 | -1.27 | 15.38 |
| FABP4      | 2167   | NM_001442    | 496 | 2.01  | 5.04  | 2.61  | -0.52 | -0.76 | -1.03 | 2.80 | 6.25  | 6.32  | 9.66  | -2.31 | 15.37 |
| ANCY       | 151    | NM_000887    | 497 | 5.65  | 5.51  | 4.61  | -0.67 | 1.11  | -0.33 | 6.69 | 3.28  | 5.29  | 15.77 | 0.12  | 15.36 |
| SHARP      | 23013  | NM_015001    | 498 | 2.43  | 2.95  | 1.36  | -1.37 | -1.29 | -1.66 | 4.76 | 6.00  | 4.60  | 6.75  | -4.32 | 15.36 |
| CHT13      | 166012 | NM_152889    | 499 | 5.33  | 0.65  | 7.47  | -1.43 | 0.48  | 0.53  | 5.30 | -0.48 | 10.54 | 13.45 | -0.42 | 15.36 |
| DNZP568021 | 25891  | NM_00101891  | 500 | 1.71  | 3.43  | 2.94  | -1.55 | -0.64 | -1.07 | 5.44 | 5.87  | 4.03  | 8.08  | -3.26 | 15.33 |
| LI1090     | 55253  | NM_018264    | 501 | 2.79  | 3.33  | 2.29  | -1.08 | -1.35 | -1.01 | 5.25 | 5.63  | 4.45  | 8.41  | -3.45 | 15.33 |
| MGC71999   | 342538 | NM_199290    | 502 | 3.38  | 2.31  | 1.39  | -1.45 | -1.22 | -0.94 | 6.55 | 5.94  | 2.83  | 7.08  | -3.61 | 15.33 |
| VHL        | 7428   | NM_198156    | 503 | 0.71  | 3.16  | 1.78  | -0.36 | -0.60 | -1.04 | 2.73 | 6.71  | 5.88  | 5.64  | -2.00 | 15.31 |
| RPL12      | 6138   | NM_002048    | 504 | 5.86  | 3.28  | 3.06  | -1.01 | -0.73 | -0.91 | 6.49 | 4.81  | 4.02  | 12.21 | -2.65 | 15.31 |
| ALPPL2     | 251    | NM_013113    | 505 | 1.89  | 1.38  | 1.44  | -1.56 | -1.80 | -1.85 | 7.01 | 3.54  | 4.74  | 4.71  | -5.21 | 15.29 |
| TMEM91     | 641649 | NM_00109825  | 506 | 5.55  | 0.14  | 3.39  | -1.02 | -1.07 | -0.94 | 8.69 | 2.35  | 4.21  | 9.07  | -2.44 | 15.26 |
| LOC114772  | 124173 | NM_000145    | 507 | 1.20  | 1.40  | 1.45  | -1.20 | -1.40 | -1.45 | 2.21 | 1.15  | 2.11  | 1.15  | -1.12 | 15.24 |
| MGC15668   | 84842  | NM_023756    | 508 | 3.16  | 2.59  | 2.65  | -1.09 | -1.29 | -0.90 | 4.62 | 7.01  | 3.61  | 8.39  | -3.28 | 15.24 |
| UF1        | 51500  | NM_016406    | 509 | 2.20  | 2.24  | 1.33  | -1.82 | -2.16 | -1.20 | 5.18 | 7.43  | 2.60  | 5.77  | -5.18 | 15.22 |
| NRX2B5     | 37524  | NM_136555    | 510 | 3.27  | 1.83  | 2.89  | -1.20 | -0.86 | -0.90 | 3.77 | 4.83  | 3.88  | 8.59  | -1.81 | 15.20 |
| KIA1737    | 85457  | NM_033426    | 511 | 1.08  | 1.99  | 1.88  | -1.68 | -1.37 | -1.55 | 5.08 | 4.62  | 5.49  | 5.15  | -4.79 | 15.19 |
| FLUAD09    | 120935 | NM_182496    | 512 | 0.46  | 0.12  | 0.76  | -2.03 | -2.33 | -1.61 | 4.83 | 7.20  | 3.12  | 3.14  | -5.98 | 15.16 |
| KRTAP5-4   | 387267 | NM_00102709  | 513 | 4.81  | 2.86  | 2.22  | -0.49 | -0.57 | -0.59 | 6.48 | 4.51  | 4.14  | 9.69  | -1.64 | 15.14 |
| FLJ1347    | 6484   | NM_002927    | 514 | 6.32  | 1.12  | 1.23  | -1.07 | -4.82 | -1.07 | 4.82 | 1.12  | 1.23  | 11.66 | -2.78 | 14.14 |
| UX1        | 80146  | NM_012476    | 515 | 2.85  | 2.46  | 1.73  | -1.67 | -1.11 | -0.94 | 7.98 | 4.41  | 2.74  | 7.04  | -3.72 | 15.13 |
| EFHEM1     | 56478  | NM_019843    | 516 | 1.41  | 2.51  | 0.99  | -1.40 | -1.56 | -1.71 | 2.54 | 5.90  | 6.67  | 4.92  | -4.67 | 15.11 |
| ICR19      | 51189  | NM_001606    | 517 | 0.82  | 1.06  | 1.63  | -1.02 | -1.06 | -1.18 | 5.66 | 1.18  | 1.57  | 3.51  | -5.68 | 15.08 |
| ATPV12     | 90423  | NM_080653    | 518 | 3.10  | 3.94  | 2.42  | -1.70 | -0.92 | -1.12 | 6.21 | 5.57  | 3.29  | 9.46  | -3.74 | 15.07 |
| FZD7       | 8324   | NM_003507    | 519 | 1.49  | 2.68  | 2.69  | -0.89 | -0.98 | -1.44 | 2.75 | 6.54  | 5.77  | 6.86  | -3.30 | 15.06 |
| IL13320    | 151799 | NM_0018424   | 520 | 5.28  | 4.28  | 4.17  | -1.47 | -1.98 | -2.82 | 8.28 | 4.77  | 2.62  | 8.28  | -4.77 | 15.06 |
| SARS       | 6301   | NM_006513    | 521 | 8.19  | 4.31  | 2.01  | -0.61 | -0.18 | 0.22  | 8.47 | 5.14  | 1.44  | 14.44 | -0.57 | 15.05 |
| MGC16169   | 93627  | NM_033115    | 522 | 5.92  | 3.94  | 2.62  | -0.31 | 0.12  | -0.08 | 6.59 | 4.79  | 3.67  | 12.48 | -0.28 | 15.05 |
| PRAT       | 5471   | NM_002703    | 523 | 0.96  | 1.19  | 0.43  | -1.78 | -1.94 | -1.61 | 4.29 | 5.57  | 5.16  | 2.99  | -5.33 | 15.02 |
| SEC22      | 56202  | NM_059294    | 524 | 2.90  | 2.95  | 1.71  | -1.55 | -1.55 | -1.77 | 3.56 | 3.56  | 1.71  | 3.56  | -5.73 | 14.99 |
| TM3        | 342125 | NM_00180532  | 525 | 0.56  | -0.01 | 1.71  | -1.55 | -1.98 | -2.20 | 1.11 | 4.97  | 8.91  | 1.15  | -3.73 | 14.99 |
| GLRA4      | 441509 | NM_497139    | 526 | -0.77 | 0.46  | 0.17  | -2.30 | -2.33 | -2.20 | 2.85 | 6.85  | 5.27  | -0.15 | -6.82 | 14.96 |
| MOZF9      | 80252  | NM_170770    | 527 | 2.07  | 0.86  | 1.67  | -1.77 | -1.77 | -1.77 | 3.82 | 1.67  | 1.67  | 3.82  | -0.15 | 14.96 |
| TGM5       | 9333   | NM_004245    | 528 | 1.88  | 1.20  | 0.60  | -1.78 | -1.29 | -1.18 | 9.00 | 3.62  | 2.34  | 3.67  | -4.24 | 14.95 |
| DNZP761810 | 91950  | NM_001130726 | 529 | 2.39  | 3.80  | 0.69  | -1.60 | -2.09 | -1.51 | 4.80 | 7.35  | 2.78  | 6.59  | -5.20 | 14.93 |
| FLJ32548   | 153849 | NM_0015248   | 530 | 5.48  | 4.25  | 4.21  | -2.26 | -2.26 | -2.26 | 6.26 | 4.21  | 2.26  | 6.26  | -2.21 | 14.92 |
| PICALM     | 8301   | NM_00100860  | 531 | 2.31  | 0.50  | 1.06  | -1.68 | -1.92 | -2.00 | 7.68 | 1.66  | 5.57  | 8.87  | -5.60 | 14.92 |
| CPB8       | 9236   | NM_004748    | 532 | 2.76  | 4.88  | 7.20  | -1.14 | -1.65 | -0.49 | 3.26 | 7.55  | 4.10  | 14.64 | -3.28 | 14.91 |
| GPI1       | 23426  | NM_290559    | 533 | 2.89  | 1.36  | 1.28  | -1.70 | -1.23 | -1.83 | 5.78 | 4.26  | 4.85  | 6.13  | -4.75 | 14.88 |
| DCOR20     | 13813  | NM_040232    | 534 | 4.14  | 4.17  | 3.49  | -0.56 | -0.56 | -0.56 | 5.28 | 6.00  | 11.69 | 11.69 | -1.15 | 14.88 |
| SCAMOL     | 6307   | NM_001017369 | 535 | 2.13  | 2.95  | 4.22  | -0.69 | -0.68 | -1.07 | 3.76 | 3.78  | 7.31  | 9.30  | -2.44 | 14.85 |
| MGC13867   | 90231  | NM_138346    | 536 | 4.04  | 2.93  | 1.84  | -0.85 | -0.94 | -1.34 | 5.76 | 3.57  | 5.51  | 8.80  | -1.14 | 14.84 |
| MICA       | 662    | NM_003708    | 537 | 0.90  | 1.21  | 1.38  | -1.52 | -1.53 | -1.53 | 5.20 | 4.82  | 4.29  | 4.29  | -4.26 | 14.84 |
| RHD3       | 84206  | NM_012246    | 538 | 29.66 | 25.21 | 21.90 | -0.42 | -0.48 | -1.44 | 7.03 | 4.39  | 3.41  | 76.77 | -1.94 | 14.83 |
| PUS1       | 80324  | NM_001002020 | 539 | 0.67  | 0.49  | 0.78  | -1.87 | -1.54 | -2.10 | 5.70 | 3.56  | 5.55  | 1.93  | -5.52 | 14.80 |
| HRH5       | 691    | NM_000788    | 540 | 4.28  | 1.52  | 2.68  | -0.80 | -0.80 | -0.97 | 6.64 | 3.65  | 4.88  | 8.48  | -2.76 | 14.80 |
| TRIM64     | 120146 | NM_061890    | 541 | 2.89  | 1.58  | 1.42  | -1.80 | -1.65 | -1.62 | 7.70 | 3.78  | 3.32  | 5.89  | -5.06 | 14.79 |
| PLEKHM1    | 9842   | NM_014798    | 542 | 6.82  | 4.40  | 7.16  | -0.43 | -0.05 | -0.27 | 5.04 | 4.82  | 4.92  | 18.18 | -0.65 | 14.78 |
| NFKB1      | 79672  | NM_024639    | 543 | 0.99  | 2.70  | 2.10  | -1.37 | -1.91 | -1.26 | 4.08 | 6.94  | 3.76  | 5.73  | -4.53 | 14.78 |
| ARMC6      | 94794  | NM_000101    | 544 | 0.97  | 0.35  | 0.64  | -1.66 | -1.64 | -1.64 | 7.87 | 3.26  | 3.66  | 1.05  | -5.06 | 14.75 |
| ARMC6      | 93436  | NM_033415    | 545 | -0.59 | -0.12 | 1.70  | -2.23 | -2.29 | -2.44 | 2.07 | 2.61  | 10.08 | 0.98  | -6.96 | 14.74 |
| MGC5395    | 79026  | NM_024060    | 546 | 1.00  | 2.65  | 0.67  | -2.36 | -1.90 | -1.32 | 4.81 | 5.04  | 4.88  | 4.32  | -5.58 | 14.73 |
| FLJ8114    | 24538  | NM_001037499 | 547 | 2.15  | 1.73  | 1.60  | -1.82 | -1.82 | -1.82 | 5.89 | 1.82  | 1.82  | 5.89  | -1.82 | 14.73 |
| ZBTB38     | 253461 | NM_172341    | 548 | 0.47  | 1.11  | 1.66  | -0.93 | -0.63 | -1.33 | 1.74 | 5.78  | 7.17  | 3.24  | -2.89 | 14.69 |
| AVIL       | 10677  | NM_006576    | 549 | 2.61  | 5.29  | 2.43  | -0.90 | 1.00  | 0.27  | 5.93 | 6.06  | 2.68  | 10.33 | 0.38  | 14.67 |
| HRCA       | 5387   | NM_0001650   | 550 | 4.28  | 1.22  | 1.66  | -1.28 | -1.66 | -1.66 | 4.28 | 1.22  | 1.66  | 4.28  | -1.22 | 14.67 |
| HSPC016    | 51372  | NM_015933    | 551 | 1.11  | 1.86  | -0.50 | -2.22 | -1.76 | -1.73 | 3.66 | 7.69  | 3.80  | 1.48  | -5.70 | 14.65 |
| NPL        | 80896  | NM_030769    | 552 | 1.76  | 1.31  | 0.10  | -1.18 | -2.29 | -1.73 | 4.29 | 6.46  | 3.89  | 3.17  | -5.40 | 14.64 |
| PCF11      | 51535  | NM_015885    | 553 | 2.47  | -0.76 | 0.56  | -2.33 | -2.13 | -2.40 | 7.40 | 0.91  | 6.29  | 2.27  | -6.86 | 14.61 |
| NR4F10     | 57862  | NM_021488    | 554 | 5.88  | 1.40  | 1.06  | -1.42 | -1.42 | -1.42 | 6.50 | 4.42  | 2.62  | 1.33  | -1.82 | 14.60 |
| COL11A2    | 1302   | NM_080679    | 555 | 2.70  | 3.27  | 3.81  | -1.18 | -1.09 | -0.75 | 3.69 | 5.65  | 5.26  | 9.77  | -3.02 | 14.60 |
| CHRNA4     | 1143   | NM_000750    | 556 | 4.98  | 2.38  | 1.89  | -1.05 | -1.39 | -1.08 | 6.12 | 5.03  | 3.44  | 9.45  | -3.22 | 14.59 |
| MGC254     | 7995   | NM_004109    | 557 | 2.16  | 1.58  | 1.58  | -1.66 | -1.66 | -1.66 | 4.66 | 9.57  | 9.57  | 9.50  | -1.79 | 14.59 |
| FLJ5555    | 124930 | NM_152345    | 558 | -0.02 | 2.88  | -0.05 | -1.02 | -1.59 | -1.33 | 1.26 | 11.81 | 1.48  | 2.81  | 3.94  | 14.56 |
| LOC149469  | 14     |              |     |       |       |       |       |       |       |      |       |       |       |       |       |

|             |        |              |     |       |       |       |       |       |       |       |       |      |       |       |       |       |
|-------------|--------|--------------|-----|-------|-------|-------|-------|-------|-------|-------|-------|------|-------|-------|-------|-------|
| RSHDML      | 149092 | NM_178491    | 641 | 5.88  | 2.05  | 2.17  | 0.04  | 0.44  | -0.12 | 8.39  | 2.53  | 2.55 | 10.09 | 0.35  | 13.48 |       |
| ZNF262      | 6197   | NM_020395    | 642 | -0.75 | 3.18  | 2.04  | -0.41 | -0.09 | -0.37 | 6.48  | 4.07  | 4.07 | 8.48  | 0.86  | -1.38 |       |
| CSORF40     | 55071  | NM_017998    | 643 | 3.81  | 1.99  | 2.49  | -0.92 | -0.39 | -0.30 | 7.45  | 4.51  | 1.50 | 10.29 | 1.61  | 13.46 |       |
| GLI4        | 2738   | NM_138465    | 644 | -0.20 | 1.98  | 4.34  | -0.59 | -0.41 | -0.54 | 0.38  | 4.17  | 8.90 | 6.12  | -1.54 | 13.45 |       |
| TCF31       | 6949   | NM_00108057  | 645 | 3.20  | 2.91  | 1.03  | -0.99 | -1.22 | -0.83 | 5.65  | 4.86  | 2.92 | 7.14  | -3.04 | 13.44 |       |
| FBW7        | 5524   | NM_0313415   | 646 | 5.51  | 1.60  | 1.01  | -0.75 | -0.71 | 0.67  | 7.66  | 1.83  | 3.60 | 11.83 | 2.71  | 13.43 |       |
| ASL         | 435    | NM_000048    | 647 | 0.74  | 2.91  | -0.91 | -0.36 | -1.65 | -1.47 | 6.22  | 6.22  | 0.99 | 2.74  | -3.48 | 13.43 |       |
| LOC606495   | 606495 | NM_001031672 | 648 | -0.77 | -0.20 | 0.83  | -2.20 | -1.92 | -2.03 | 1.55  | 3.05  | 8.82 | -0.15 | -6.16 | 13.43 |       |
| LOC154643   | 154643 | NM_000000    | 649 | 6.27  | 1.40  | 2.55  | -1.40 | -1.77 | -1.40 | 1.90  | 2.77  | 1.40 | 5.47  | 6.28  | 13.41 |       |
| CYP19A1     | 1588   | NM_000103    | 650 | 0.66  | 1.66  | 0.03  | -0.35 | -2.52 | -2.45 | -1.28 | 6.00  | 4.22 | 2.28  | 2.67  | -6.24 | 13.40 |
| IPD3        | 9670   | NM_014652    | 651 | -0.69 | 0.07  | -0.15 | -1.63 | -2.25 | -2.10 | 1.85  | 7.32  | 4.21 | -0.77 | -5.98 | 13.39 |       |
| HC-8        | 558    | NM_001010022 | 652 | 4.83  | 1.77  | 2.74  | -1.67 | -1.12 | -1.12 | 7.40  | 2.11  | 3.12 | 8.84  | -0.71 | 13.39 |       |
| MGC2198     | 192286 | NM_138820    | 653 | 4.86  | 1.66  | 1.28  | -0.67 | -1.12 | -1.16 | 4.84  | 4.50  | 4.02 | 8.80  | -2.96 | 13.36 |       |
| ZNF528      | 84436  | NM_032423    | 654 | 4.00  | 2.13  | 4.00  | -1.06 | 0.00  | 0.40  | 4.11  | 1.75  | 7.50 | 10.12 | -0.66 | 13.36 |       |
| KIFAP-12    | 83755  | NM_031854    | 655 | 0.58  | 1.63  | 1.96  | -1.25 | -1.07 | -1.49 | 2.14  | 4.73  | 6.47 | 4.07  | -3.81 | 13.35 |       |
| GHL         | 276    | NM_020066    | 656 | 2.24  | 2.93  | 2.60  | -1.44 | -1.17 | -0.52 | 6.34  | 4.15  | 2.84 | 7.77  | 3.52  | 13.33 |       |
| WNT8B       | 7479   | NM_003393    | 657 | 2.90  | 2.98  | 4.37  | -0.38 | -0.22 | -0.03 | 5.13  | 3.75  | 4.45 | 10.25 | -0.62 | 13.32 |       |
| SLSA12      | 159963 | NM_178498    | 658 | 1.84  | -0.11 | 2.10  | -1.22 | -1.09 | -1.06 | 6.25  | 1.34  | 5.73 | 3.82  | -3.37 | 13.31 |       |
| FLJ20241    | 54862  | NM_017721    | 659 | 5.42  | 5.77  | 6.32  | 1.33  | 0.70  | 1.12  | 4.55  | 4.29  | 4.27 | 17.50 | 0.15  | 13.31 |       |
| TP53B1      | 9537   | NM_006034    | 660 | 2.10  | 1.78  | 1.65  | -1.52 | -0.78 | -1.26 | 6.45  | 3.17  | 3.68 | 5.54  | -3.56 | 13.30 |       |
| PLA2G4D     | 283748 | NM_178034    | 661 | 6.03  | 3.26  | 3.52  | -0.70 | -0.65 | -0.64 | 5.77  | 4.10  | 3.43 | 12.81 | -1.99 | 13.30 |       |
| BSNT5       | 84802  | NM_020247    | 662 | 4.09  | 2.71  | 3.84  | -0.92 | -1.50 | -0.60 | 5.67  | 4.83  | 2.78 | 10.64 | -3.02 | 13.29 |       |
| VPRE3       | 29802  | NM_013378    | 663 | 2.42  | 0.47  | 0.91  | -0.97 | -0.24 | -1.03 | 6.72  | 3.34  | 3.21 | 3.80  | -2.24 | 13.27 |       |
| SYNE1       | 23345  | NM_133650    | 664 | 0.67  | 1.01  | 1.57  | -1.59 | -1.84 | -1.38 | 3.36  | 5.62  | 4.29 | 3.25  | -4.80 | 13.27 |       |
| PLKXH1      | 58473  | NM_021200    | 665 | 3.82  | 1.44  | 5.69  | -0.80 | -1.13 | -0.88 | 5.92  | 1.56  | 5.77 | 10.95 | -2.31 | 13.24 |       |
| SOX2        | 6657   | NM_000106    | 666 | 2.94  | 2.55  | 3.48  | -1.15 | -0.86 | -0.44 | 5.59  | 3.25  | 4.40 | 8.97  | -2.45 | 13.24 |       |
| GUCY1A2     | 2977   | NM_000855    | 667 | 2.56  | 2.29  | 2.38  | 0.57  | 0.43  | -1.76 | 1.25  | 2.69  | 9.26 | 7.22  | -0.76 | 13.20 |       |
| BTNA3       | 10384  | NM_197974    | 668 | 7.35  | 5.62  | 6.76  | -0.09 | -0.84 | -0.25 | 3.56  | 6.35  | 3.29 | 19.73 | -0.67 | 13.20 |       |
| FLJ23657    | 152815 | NM_020697    | 669 | 0.72  | 1.06  | 1.60  | -0.71 | -0.60 | -0.60 | 2.72  | 3.63  | 3.69 | 5.38  | 2.83  | 13.19 |       |
| FKBP2       | 2386   | NM_057092    | 670 | 5.95  | 5.08  | 1.31  | -0.77 | -0.41 | -0.64 | 7.33  | 3.92  | 1.93 | 12.35 | -1.82 | 13.17 |       |
| PKR1        | 5295   | NM_181504    | 671 | 2.11  | 1.68  | 1.56  | -1.26 | -0.34 | -1.36 | 7.24  | 2.09  | 3.83 | 5.35  | -2.96 | 13.16 |       |
| MDX1        | 1081   | NM_001657    | 672 | -1.32 | 0.87  | 1.37  | -1.20 | -1.41 | -1.07 | 3.87  | 3.80  | 2.20 | 3.56  | -4.01 | 13.14 |       |
| DKFZPB66215 | 643155 | NM_001048249 | 673 | 2.15  | 1.10  | 2.45  | -1.00 | -1.08 | -1.26 | 3.68  | 5.37  | 4.04 | 7.70  | 3.23  | 13.09 |       |
| KRT1A3B     | 3884   | NM_002279    | 674 | 12.71 | 6.81  | 8.37  | 1.30  | 0.80  | 1.51  | 7.99  | 2.72  | 2.37 | 27.90 | 3.61  | 13.08 |       |
| SLSA11      | 162513 | NM_153357    | 675 | 1.91  | 1.25  | 1.96  | -1.64 | -1.45 | -1.57 | 4.72  | 3.85  | 4.50 | 5.12  | -4.65 | 13.07 |       |
| FLAU        | 136    | NM_000658    | 676 | 1.36  | 2.43  | 1.36  | -0.18 | -0.12 | -0.12 | 4.67  | 3.52  | 4.63 | 6.30  | 0.93  | 13.07 |       |
| ANKK5       | 308    | NM_001154    | 677 | 3.73  | 4.60  | 3.90  | -0.08 | 0.29  | -0.69 | 5.06  | 2.86  | 5.10 | 12.24 | -4.48 | 13.03 |       |
| NO4         | 8715   | NM_003787    | 678 | 0.07  | 0.19  | 1.21  | -1.52 | -1.26 | -1.80 | 2.72  | 2.20  | 8.09 | 1.33  | -4.59 | 13.01 |       |
| LOC11517    | 402281 | NM_02101077  | 679 | 1.76  | 1.51  | 1.66  | -1.13 | -0.36 | -1.13 | 6.23  | 8.51  | 1.47 | 7.63  | 3.59  | 13.01 |       |
| FLJ1193     | 55322  | NM_018356    | 680 | 2.42  | 2.48  | 1.90  | -0.96 | -0.07 | -1.10 | 6.38  | 2.76  | 3.86 | 6.80  | -1.22 | 13.00 |       |
| DKFZPB46137 | 84064  | NM_032124    | 681 | 3.04  | 2.37  | 2.66  | -1.16 | -1.29 | -1.13 | 4.21  | 5.00  | 3.78 | 8.07  | -3.58 | 13.00 |       |
| FBX7L       | 4198   | NM_020305    | 682 | 0.10  | 4.39  | 0.20  | -0.65 | -0.40 | -0.65 | 4.80  | 5.88  | 0.52 | 4.87  | -1.30 | 12.98 |       |
| SNP         | 9751   | NM_014723    | 683 | -1.20 | 5.59  | 2.34  | -2.41 | -1.68 | -1.35 | 0.09  | 10.10 | 2.78 | 6.74  | -5.44 | 12.97 |       |
| GLUL        | 2752   | NM_001033044 | 684 | 2.48  | 4.69  | 2.54  | -0.81 | -0.05 | -0.42 | 5.06  | 4.99  | 2.90 | 9.71  | -1.28 | 12.96 |       |
| NEDD5       | 4735   | NM_004404    | 685 | 0.43  | 1.24  | 1.99  | -1.83 | -1.68 | -1.47 | 3.84  | 4.76  | 4.34 | 3.66  | -4.98 | 12.94 |       |
| FLJ41882    | 17090  | NM_020614    | 686 | 1.94  | 2.43  | 1.17  | -1.32 | -1.17 | -1.32 | 1.87  | 5.24  | 3.82 | 6.74  | -2.47 | 12.89 |       |
| C10ORF24    | 219736 | NM_001130160 | 687 | 3.70  | 5.47  | 1.57  | -1.16 | -0.86 | -1.34 | 1.59  | 5.85  | 4.66 | 2.38  | 10.74 | -3.21 | 12.89 |
| MEIS2       | 4212   | NM_172315    | 688 | 0.95  | 2.47  | 0.71  | -1.41 | -1.84 | -1.34 | 3.55  | 6.39  | 2.94 | 4.13  | -4.58 | 12.88 |       |
| MARCKD      | 664    | NM_001008002 | 689 | 4.55  | 2.81  | 1.69  | -1.49 | -1.49 | -1.49 | 4.55  | 2.81  | 1.69 | 2.81  | -2.81 | 12.88 |       |
| SEC142      | 23541  | NM_012429    | 690 | 2.44  | 1.73  | 2.50  | -1.28 | -0.66 | -0.73 | 2.76  | 4.89  | 5.22 | 6.67  | -1.67 | 12.87 |       |
| DNAH2       | 3300   | NM_01039550  | 691 | -0.72 | 1.89  | 0.64  | -1.86 | -2.61 | -1.74 | 0.81  | 3.79  | 4.66 | 1.81  | -6.20 | 12.87 |       |
| FBX7L       | 8459   | NM_020305    | 692 | 0.28  | 1.67  | 0.54  | -0.67 | -0.67 | -0.67 | 4.80  | 5.88  | 0.52 | 4.87  | -1.30 | 12.86 |       |
| ITM2B       | 9445   | NM_021999    | 693 | 10.48 | 6.46  | 6.54  | 0.73  | 1.00  | 0.56  | 5.01  | 3.00  | 4.83 | 23.48 | -2.29 | 12.84 |       |
| PLIN        | 5346   | NM_002666    | 694 | 3.67  | 1.32  | 1.80  | -1.52 | -1.14 | -1.24 | 5.60  | 3.39  | 3.85 | 6.79  | -3.89 | 12.84 |       |
| CRZL1       | 9946   | NM_005111    | 695 | 0.67  | 1.02  | 1.35  | -1.68 | -1.73 | -1.54 | 4.66  | 5.13  | 3.04 | 3.04  | -4.94 | 12.84 |       |
| KOZT3       | 34450  | NM_198020    | 696 | 1.23  | 2.41  | 1.89  | -1.07 | -0.87 | -0.86 | 4.02  | 5.04  | 3.69 | 6.53  | 3.54  | 12.83 |       |
| DOX39       | 10212  | NM_005804    | 697 | 0.92  | 1.15  | 1.09  | -1.47 | -1.51 | -1.09 | 3.36  | 3.86  | 5.60 | 3.16  | -4.66 | 12.83 |       |
| TMEM43      | 79188  | NM_024334    | 698 | 2.19  | 2.56  | 2.78  | -1.28 | -1.60 | -1.13 | 3.75  | 5.41  | 3.66 | 7.52  | -4.01 | 12.82 |       |
| FNX1        | 387    | NM_020305    | 699 | 1.30  | 2.19  | 0.85  | -1.54 | -1.87 | -1.54 | 4.49  | 4.87  | 2.52 | 2.57  | -5.69 | 12.81 |       |
| UZAF1       | 7307   | NM_006758    | 700 | -0.22 | -0.04 | -0.37 | -2.09 | -2.82 | -3.09 | 4.13  | 7.01  | 1.67 | 1.63  | -7.99 | 12.80 |       |
| CHRNA3      | 11316  | NM_000743    | 701 | 1.80  | 2.25  | 0.79  | -1.35 | -0.84 | -1.56 | 4.71  | 4.22  | 3.85 | 4.84  | -3.75 | 12.79 |       |
| MGC3646     | 157807 | NM_020305    | 702 | 5.08  | 4.14  | 2.25  | -0.86 | -0.17 | -0.36 | 5.72  | 3.32  | 3.95 | 11.46 | -1.78 | 12.79 |       |
| PHI         | 51052  | NM_015893    | 703 | 0.30  | 0.80  | 1.10  | -1.92 | -1.89 | -1.27 | 3.56  | 5.70  | 3.51 | 3.80  | -5.08 | 12.78 |       |
| MAADA36     | 9581   | NM_006036    | 704 | -0.72 | 2.45  | 2.14  | -1.10 | -1.27 | -0.90 | 0.66  | 6.83  | 5.29 | 3.87  | -3.26 | 12.78 |       |
| LOC18880    | 188850 | NM_178414    | 705 | 2.02  | 1.16  | 0.50  | -1.93 | -1.92 | -1.92 | 4.80  | 5.66  | 2.31 | 3.68  | -5.17 | 12.77 |       |
| FLJ1091     | 5519   | NM_000106    | 706 | 1.48  | 1.48  | 1.48  | -1.48 | -1.48 | -1.48 | 5.03  | 3.64  | 3.64 | 5.03  | 3.64  | 12.76 |       |
| SNK1G2      | 1455   | NM_001319    | 707 | 2.74  | 4.26  | 1.42  | -0.94 | -1.25 | -1.03 | 3.25  | 6.60  | 2.90 | 8.43  | -3.21 | 12.75 |       |
| DKC1        | 1736   | NM_001363    | 708 | 0.42  | 0.62  | 1.24  | -1.97 | -1.94 | -0.88 | 3.98  | 5.19  | 3.57 | 2.28  | -4.79 | 12.74 |       |
| BA16C5      | 8416   | NM_020305    | 709 | 3.98  | 2.59  | 2.37  | -0.67 | -0.67 | -0.67 | 3.46  | 3.59  | 3.59 | 9.31  | -1.29 | 12.74 |       |
| FLJ20772    | 55039  | NM_017956    | 710 | 0.04  | 1.71  | 1.15  | -2.03 | -1.71 | -1.47 | 4.96  | 4.65  | 3.10 | 2.91  | -5.21 | 12.71 |       |
| GM001       | 57003  | NM_020198    | 711 | 1.00  | 2.21  | 0.29  | -1.39 | -1.04 | -1.22 | 5.06  | 5.48  | 2.17 | 3.49  | -3.64 | 12.70 |       |
| FLJ64496    | 64496  | NM_020305    | 712 | 1.34  | 3.28  | 2.21  | -0.17 | -0.17 | -0.17 | 4.11  | 4.78  | 2.31 | 10.73 | -1.28 | 12.70 |       |
| ARS2        | 51593  | NM_015908    | 713 | 2.74  | 0.85  | 5.51  | -1.95 | -2.15 | -1.40 | 1.13  | 1.92  | 8.64 | 9.09  | -4.69 | 12.69 |       |
| PRC1        | 9055   | NM_199414    | 714 | 1.58  | 1.54  | 3.02  | -0.73 | -1.10 | -0.57 | 3.08  | 5.21  | 4.40 | 6.12  | -2.40 | 12.69 |       |
| NAN1L1      | 4673   | NM_004537    | 715 | 3.49  | 2.04  | 1.59  | -0.63 | -0.69 | -1.10 | 3.40  | 4.44  | 4.84 | 7.14  | -2.49 | 12.68 |       |
| KC1L3       | 23786  | NM_015897    | 716 | 4.03  | 4.44  | 4.92  | -2.68 | -2.42 | -2.68 | 4.84  | 2.79  | 3.89 | 8.39  | -0.29 | 12.68 |       |
| PCLL1       | 6334   | NM_006226    | 717 | 2.09  | 4.38  | 1.60  | -0.90 | -1.32 | -1.20 | 3.08  | 6.55  | 3.04 | 8.07  | -3.51 | 12.67 |       |
| TCF1        | 5194   | NM_005997    | 718 | 1.16  | 3.29  | 4.31  | 1.16  | -0.82 | -0.76 | 0.67  | 4.72  | 7.26 | 8.75  | -4.01 | 12.66 |       |
| MPO13A      | 39987  | NM_020305    | 719 | 1.65  | 1.79  | 1.61  | -1.26 | -1.26 | -1.26 | 5.14  | 3.52  | 3.10 | 7.25  | 1.13  | 12.66 |       |
| CHP1        | 56994  | NM_020244    | 720 | 3.10  | 2.26  | 1.90  | -0.99 | -1.20 | -0.63 | 4.53  | 6.31  | 1.76 | 6.66  | -6.22 | 12.   |       |

|             |        |               |     |       |       |       |       |       |       |      |      |      |       |       |       |
|-------------|--------|---------------|-----|-------|-------|-------|-------|-------|-------|------|------|------|-------|-------|-------|
| MGC50853    | 399665 | NMM_020305    | 803 | 1.25  | 2.09  | 6.03  | -0.98 | -1.20 | -0.92 | 3.28 | 4.12 | 4.37 | 9.37  | -3.10 | 11.77 |
| FLJ27505    | 389297 | NMM_020405    | 804 | 1.81  | 2.58  | 2.80  | -0.72 | -1.64 | -0.94 | 2.85 | 5.67 | 3.16 | 7.80  | -3.21 | 11.77 |
| KPC         | 7598   | NMM_004628    | 805 | 0.01  | 0.26  | 0.05  | -2.08 | -2.04 | -1.86 | 3.82 | 3.94 | 4.00 | 0.32  | 5.99  | 11.77 |
| UBE2E1      | 7324   | NMM_182666    | 806 | -1.23 | -0.86 | 2.35  | -2.40 | -2.48 | -2.02 | 0.85 | 2.76 | 8.13 | 0.26  | -6.89 | 11.75 |
| CHRM2       | 1129   | NMM_00100629  | 807 | -0.31 | -0.65 | 0.62  | -2.05 | -2.11 | -2.22 | 4.18 | 2.38 | 5.19 | -0.33 | -6.38 | 11.75 |
| THP11       | 9219   | NMM_020237    | 808 | 0.18  | 0.38  | 0.92  | -0.34 | -0.56 | -0.67 | 2.55 | 3.64 | 5.56 | 3.44  | 2.74  | 11.75 |
| FBP11       | 8108   | NMM_030917    | 809 | 1.66  | -0.35 | 5.20  | -0.77 | -1.65 | -0.92 | 2.28 | 3.61 | 5.86 | 6.51  | -3.34 | 11.74 |
| WFDCC9      | 259240 | NMM_147198    | 810 | 2.87  | 3.54  | 2.40  | -0.63 | -0.86 | -0.97 | 2.75 | 4.71 | 4.27 | 8.81  | -2.46 | 11.74 |
| CTCL1       | 8218   | NMM_030335    | 811 | 1.12  | 1.21  | 2.24  | -1.01 | -1.22 | -1.45 | 2.29 | 2.84 | 6.57 | 5.77  | 1.79  | 11.74 |
| BRDCL       | 254005 | NMM_153152    | 812 | 3.11  | 1.07  | 0.70  | -0.83 | -0.72 | -1.34 | 5.15 | 2.66 | 9.91 | 4.87  | -2.89 | 11.71 |
| AOX1        | 7416   | NMM_001159    | 813 | 1.22  | 0.73  | 1.38  | -1.47 | -0.62 | -1.36 | 4.26 | 2.03 | 5.43 | 3.39  | -1.45 | 11.71 |
| ITG5        | 11569  | NMM_00307795  | 814 | -0.12 | 0.14  | 1.54  | -0.77 | -1.04 | -0.67 | 3.83 | 5.23 | 2.65 | 6.09  | -1.33 | 11.71 |
| RLN2        | 6019   | NMM_134441    | 815 | 2.75  | 2.36  | 2.03  | -0.97 | -0.96 | -0.72 | 4.52 | 2.47 | 8.14 | 7.17  | -1.70 | 11.70 |
| ZNF600      | 162966 | NMM_198457    | 816 | 1.15  | 4.39  | 2.04  | -0.86 | 1.02  | -1.42 | 3.04 | 1.29 | 7.38 | 7.78  | -1.25 | 11.70 |
| MCL136      | 78988  | NMM_020425    | 817 | 2.13  | 4.39  | 2.24  | -0.85 | -1.07 | -0.79 | 4.02 | 4.46 | 3.21 | 8.77  | -1.17 | 11.70 |
| NMUR2       | 5692   | NMM_020167    | 818 | 1.38  | 2.31  | 1.86  | -0.80 | -1.27 | -0.81 | 2.51 | 3.75 | 3.63 | 5.55  | -2.90 | 11.69 |
| MCK5        | 8388   | NMM_001004426 | 819 | 1.20  | 4.10  | 2.00  | -0.88 | -1.41 | -1.04 | 3.34 | 6.37 | 1.97 | 7.29  | -3.34 | 11.68 |
| MCK5        | 10445  | NMM_001012300 | 820 | 0.02  | 0.02  | -0.13 | -1.19 | -1.96 | -1.53 | 2.26 | 6.14 | 3.27 | -0.08 | -4.68 | 11.67 |
| MGC51650    | 5138   | NMM_0100121   | 821 | 1.17  | 1.68  | 1.10  | -1.65 | -1.30 | -1.58 | 4.53 | 2.11 | 4.02 | 3.94  | 4.53  | 11.67 |
| NMNAT3      | 349505 | NMM_178177    | 822 | 2.19  | 0.93  | 1.07  | -1.38 | -1.37 | -1.18 | 5.18 | 3.40 | 3.09 | 4.19  | -3.93 | 11.67 |
| LOC150223   | 150223 | NMM_001017964 | 823 | 1.02  | 1.30  | 3.10  | -1.53 | -0.29 | -0.52 | 5.14 | 1.07 | 5.45 | 5.42  | -2.34 | 11.66 |
| GA541       | 8089   | NMM_000530    | 824 | 2.71  | 2.26  | 2.27  | 0.31  | -0.03 | 0.34  | 4.19 | 4.68 | 2.79 | 8.24  | 0.61  | 11.66 |
| RHD10       | 157506 | NMM_172037    | 825 | 1.50  | 0.74  | 0.13  | -2.03 | -1.62 | -1.30 | 6.25 | 2.71 | 2.70 | 2.36  | -4.95 | 11.65 |
| DKFZ434A01  | 54441  | NMM_001002840 | 826 | 4.49  | 3.40  | 0.81  | -0.65 | -0.03 | -0.91 | 6.46 | 3.78 | 1.41 | 8.69  | -1.59 | 11.65 |
| KFB         | 2152   | NMM_001993    | 827 | 0.56  | 1.01  | 1.61  | -1.21 | -1.50 | -0.91 | 1.32 | 5.31 | 5.01 | 3.19  | -1.62 | 11.64 |
| NKXBE       | 4794   | NMM_000556    | 828 | 1.53  | 1.67  | 1.04  | -0.84 | -0.80 | -1.10 | 4.54 | 3.74 | 3.86 | 4.23  | -2.83 | 11.64 |
| KIAA1143    | 57456  | NMM_020696    | 829 | 0.30  | 0.98  | 0.81  | -1.44 | -1.38 | -1.44 | 5.44 | 3.32 | 2.88 | -4.26 | 11.63 |       |
| MARPKA5     | 8550   | NMM_030368    | 830 | 2.35  | 0.45  | 2.56  | -1.01 | -0.64 | -0.66 | 3.89 | 4.42 | 3.32 | 9.06  | -2.30 | 11.63 |
| TFPI3       | 2582   | NMM_021467    | 831 | 1.19  | 0.20  | 0.67  | -1.19 | -2.24 | -0.61 | 3.19 | 2.24 | 3.64 | 6.87  | 1.64  | 11.63 |
| SLC25A27    | 9481   | NMM_004277    | 832 | 1.02  | 0.47  | 0.35  | -1.42 | -1.76 | -1.67 | 5.74 | 3.50 | 2.39 | 1.84  | -4.84 | 11.63 |
| FLJ10815    | 55238  | NMM_018231    | 833 | 1.38  | 0.26  | 0.72  | -1.75 | -1.40 | -1.90 | 5.56 | 1.07 | 5.00 | 2.36  | -5.05 | 11.63 |
| LOC41161    | 44116  | NMM_001008007 | 834 | 3.61  | -0.83 | 1.63  | -1.75 | -1.61 | -1.67 | 4.89 | 2.12 | 3.64 | 8.41  | -4.88 | 11.63 |
| RENBP       | 5973   | NMM_020910    | 835 | 4.62  | 2.77  | -1.02 | -0.69 | -0.95 | -2.41 | 4.70 | 3.90 | 2.93 | 6.36  | -4.06 | 11.58 |
| FLJ12128    | 80153  | NMM_025083    | 836 | 2.98  | 3.38  | 2.32  | -0.89 | -0.85 | -0.93 | 3.39 | 4.43 | 3.75 | 8.68  | -6.27 | 11.57 |
| CDX1        | 1044   | NMM_001304    | 837 | 0.23  | -0.84 | -0.36 | -1.97 | -2.23 | -2.02 | 3.44 | 2.83 | 5.30 | -0.71 | -1.21 | 11.57 |
| DCN         | 1634   | NMM_135007    | 838 | 0.95  | 0.12  | 0.92  | -1.09 | -1.10 | -1.09 | 6.27 | 3.59 | 1.24 | 5.11  | -5.16 | 11.56 |
| SLC35E4     | 339665 | NMM_001001479 | 839 | 0.18  | 0.14  | 0.55  | -0.86 | -2.45 | -1.65 | 6.02 | 2.26 | 2.87 | 8.07  | -4.97 | 11.56 |
| PROL1       | 58903  | NMM_021225    | 840 | 0.52  | -1.09 | -0.21 | -2.02 | -2.49 | -2.51 | 0.00 | 2.06 | 3.48 | -0.78 | -7.72 | 11.55 |
| H4C         | 8774   | NMM_000326    | 841 | 2.97  | 2.34  | 1.57  | -0.40 | -0.13 | -0.26 | 4.13 | 4.66 | 3.96 | 8.89  | 1.66  | 11.55 |
| PHT         | 51604  | NMM_015937    | 842 | 0.84  | 1.03  | 1.36  | -1.39 | -1.69 | -1.62 | 2.98 | 4.47 | 4.10 | 3.23  | -4.90 | 11.54 |
| CPX3        | 59485  | NMM_001003005 | 843 | 0.15  | 1.02  | 0.10  | -1.96 | -2.38 | -2.16 | 3.11 | 5.42 | 3.00 | 1.27  | -6.50 | 11.53 |
| IGF14       | 2259   | NMM_00100815  | 844 | -0.42 | 1.08  | 1.53  | -1.51 | -1.61 | -1.51 | 4.79 | 4.39 | 2.74 | 2.04  | -4.54 | 11.52 |
| CFOR34      | 135927 | NMM_178289    | 845 | 0.63  | 1.52  | 0.37  | -0.29 | -0.61 | -1.53 | 1.32 | 3.63 | 6.77 | 5.55  | -2.44 | 11.52 |
| AMY1A       | 276    | NMM_001008221 | 846 | 2.33  | 1.83  | -0.24 | -1.76 | -1.93 | -0.24 | 4.53 | 4.77 | 2.22 | 3.93  | -3.94 | 11.51 |
| MGC57211    | 150135 | NMM_175878    | 847 | 4.17  | 3.57  | 2.81  | -0.66 | -0.88 | -0.69 | 5.24 | 3.33 | 2.94 | 10.55 | -2.24 | 11.51 |
| ITIH1       | 14088  | NMM_000300    | 848 | 1.20  | 0.33  | 0.71  | -1.03 | -1.10 | -1.03 | 8.83 | 2.77 | 3.61 | 1.72  | 3.81  | 11.50 |
| ZNF167      | 58888  | NMM_025169    | 849 | 4.86  | 2.25  | 2.51  | -0.73 | -0.60 | -0.77 | 8.83 | 1.00 | 1.64 | 9.63  | -1.20 | 11.48 |
| PADRC       | 79957  | NMM_198406    | 850 | 1.86  | 0.06  | 1.01  | -1.95 | -1.88 | -2.14 | 2.53 | 4.59 | 4.36 | 0.21  | -5.96 | 11.48 |
| KIAA1386A   | 6415   | NMM_021744    | 851 | 2.28  | 1.28  | 1.75  | -1.02 | -1.27 | -1.02 | 4.73 | 2.17 | 3.62 | 5.22  | 3.55  | 11.48 |
| IRAK1       | 3654   | NMM_00105243  | 852 | 0.26  | 2.35  | 1.50  | -1.01 | -1.62 | -1.36 | 1.70 | 6.15 | 3.62 | 1.10  | -4.00 | 11.47 |
| NH3H        | 10062  | NMM_005693    | 853 | -0.28 | 1.21  | 1.48  | -1.75 | -1.43 | -1.74 | 1.06 | 4.55 | 5.85 | 2.41  | -4.92 | 11.47 |
| NH3C2       | 5589   | NMM_000485    | 854 | 5.47  | 4.43  | 4.41  | -0.79 | -0.89 | -0.42 | 4.74 | 4.73 | 2.74 | 10.41 | -0.42 | 11.45 |
| ERH         | 2079   | NMM_000450    | 855 | 6.00  | 0.74  | 3.60  | 0.40  | 2.14  | 0.47  | 3.69 | 5.77 | 2.00 | 13.34 | -2.21 | 11.45 |
| THAP7       | 80764  | NMM_001008095 | 856 | 2.08  | 1.60  | 2.36  | -0.69 | -0.19 | -0.95 | 4.05 | 2.69 | 4.70 | 6.04  | -1.83 | 11.44 |
| HSPA14      | 51312  | NMM_016299    | 857 | 3.16  | 2.76  | 1.08  | -1.42 | -0.88 | -1.07 | 5.41 | 3.04 | 2.97 | 6.99  | -3.77 | 11.42 |
| SYT5        | 14828  | NMM_020848    | 858 | 0.42  | 0.42  | 0.49  | -0.32 | -0.62 | -0.60 | 3.19 | 1.82 | 6.82 | 8.23  | 0.25  | 11.42 |
| CH3L1       | 11116  | NMM_001276    | 859 | 6.13  | 5.07  | 6.43  | 1.69  | 1.32  | 2.23  | 2.95 | 4.46 | 4.01 | 17.63 | 5.24  | 11.42 |
| CLIC1A      | 16138  | NMM_175060    | 860 | 2.08  | 2.43  | 0.78  | -0.91 | -0.83 | -0.24 | 4.30 | 5.67 | 1.45 | 5.29  | -1.98 | 11.42 |
| TRF12       | 28572  | NMM_077424    | 861 | 2.41  | 0.97  | 0.92  | -1.62 | -1.54 | -1.02 | 6.82 | 1.84 | 2.62 | 0.56  | -5.48 | 11.40 |
| NH2         | 4922   | NMM_006183    | 862 | 4.52  | 1.06  | 2.08  | -0.93 | -0.73 | -0.12 | 5.84 | 2.79 | 2.77 | 7.66  | -1.77 | 11.40 |
| ANKRD12     | 23251  | NMM_015208    | 863 | 1.66  | 1.75  | 2.63  | -0.35 | -1.11 | -0.32 | 2.47 | 4.49 | 4.44 | 6.04  | -1.78 | 11.40 |
| PHF3        | 23489  | NMM_0015153   | 864 | 11.86 | 28.66 | 20.51 | 1.79  | 1.63  | 1.44  | 2.83 | 4.27 | 3.76 | 61.03 | 4.86  | 11.40 |
| FMN2        | 56776  | NMM_020066    | 865 | 0.53  | 0.67  | 0.76  | -1.89 | -1.79 | -1.66 | 4.19 | 3.30 | 3.80 | 1.90  | -5.34 | 11.40 |
| SIRPB2      | 55423  | NMM_080816    | 866 | 1.18  | 1.05  | 1.96  | -0.85 | -1.31 | -1.26 | 3.32 | 2.25 | 5.83 | 4.19  | -3.41 | 11.39 |
| NSP-SP17    | 84892  | NMM_016200    | 867 | 1.70  | 3.97  | 3.30  | 0.89  | 0.67  | 1.76  | 1.61 | 8.82 | 0.96 | 8.98  | 3.22  | 11.39 |
| MGC549      | 8432   | NMM_0013377   | 868 | 1.60  | 1.35  | 1.36  | -0.61 | -0.56 | -0.46 | 4.13 | 4.66 | 3.96 | 3.31  | 3.33  | 11.38 |
| ZP4         | 57829  | NMM_021186    | 869 | 0.42  | 0.77  | 1.52  | -1.25 | -1.45 | -1.62 | 1.94 | 4.96 | 4.48 | 2.71  | -4.32 | 11.37 |
| CFOR19      | 152007 | NMM_022343    | 870 | 5.67  | 5.54  | 2.01  | 0.91  | -0.27 | -0.38 | 2.78 | 6.23 | 2.35 | 3.23  | 0.28  | 11.36 |
| PMVK        | 10654  | NMM_000556    | 871 | 1.13  | 0.21  | 1.56  | -1.12 | -2.01 | -1.54 | 5.18 | 2.04 | 3.11 | 3.00  | -4.05 | 11.34 |
| DNAH12      | 54788  | NMM_017626    | 872 | 1.31  | 1.76  | 0.20  | -1.37 | -1.46 | -1.67 | 3.95 | 5.07 | 2.31 | 13.21 | -4.50 | 11.34 |
| CBORF26     | 284254 | NMM_173629    | 873 | 0.20  | -0.50 | 0.59  | -2.51 | -2.20 | -2.22 | 3.67 | 3.54 | 4.13 | -0.11 | -6.99 | 11.34 |
| IRAK2       | 8166   | NMM_00105215  | 874 | 1.86  | 2.53  | -0.66 | 3.75  | -1.86 | -1.64 | 5.75 | 3.86 | 5.16 | 5.62  | -1.55 | 11.34 |
| C22orf36    | 388886 | NMM_207644    | 875 | 0.27  | 0.55  | 2.47  | -1.49 | -2.18 | -1.27 | 1.27 | 3.99 | 6.08 | 3.28  | -4.84 | 11.33 |
| ZP2R1       | 5028   | NMM_002563    | 876 | 1.27  | 2.26  | 2.20  | -1.08 | -1.15 | -1.17 | 3.90 | 4.73 | 2.70 | 5.73  | -2.40 | 11.32 |
| FAM20C      | 255022 | NMM_001001412 | 877 | 0.15  | 0.57  | -0.18 | -2.24 | -1.99 | -2.39 | 4.03 | 2.76 | 4.51 | -0.90 | -6.63 | 11.30 |
| BTBD9       | 11478  | NMM_020713    | 878 | 1.35  | 1.44  | 1.71  | -0.46 | -0.46 | -0.46 | 2.96 | 5.62 | 5.62 | 5.50  | 0.27  | 11.30 |
| TMEM23      | 259230 | NMM_147156    | 879 | 8.08  | 6.56  | 7.78  | 2.07  | 0.17  | 0.61  | 3.46 | 3.00 | 4.80 | 22.42 | 2.85  | 11.26 |
| RP11-11C5.2 | 44045  | NMM_001017175 | 880 | 2.72  | 0.87  | 1.96  | -0.73 | -0.78 | -1.15 | 6.13 | 1.37 | 3.76 | 5.56  | -2.67 | 11.26 |
| ITIH271     | 22004  | NMM_020917    | 881 | 0.37  | 1.29  | 1.48  | -1.13 | -1.29 | -1.49 | 4.37 | 2.29 | 3.90 | 2.14  | -1.14 | 11.26 |
| ITK         | 7272   | NMM_003318    | 882 | 1.68  | 0.61  | 2.16  | -1.98 | -1.27 | -1.23 | 5.97 | 1.66 | 3.63 | 4.46  | -4.49 | 11.25 |
| KMAA15      |        |               |     |       |       |       |       |       |       |      |      |      |       |       |       |

|           |        |              |      |       |       |       |       |       |       |      |       |      |       |       |       |
|-----------|--------|--------------|------|-------|-------|-------|-------|-------|-------|------|-------|------|-------|-------|-------|
| OR6M1     | 390261 | NM_001003325 | 965  | 4.18  | 2.46  | 2.39  | 0.36  | -0.25 | -0.65 | 4.92 | 3.51  | 2.21 | 9.03  | -0.53 | 10.74 |
| WJDR      | 7459   | NM_001018566 | 966  | 2.13  | 3.70  | 1.81  | -0.40 | -0.62 | -0.68 | 2.84 | 3.60  | 2.50 | 7.63  | -2.06 | 12.73 |
| NP24      | 10959  | NM_000815    | 967  | 2.18  | 1.55  | 0.34  | -0.82 | -0.84 | -0.71 | 5.57 | 3.45  | 1.71 | 4.07  | -2.38 | 10.73 |
| NP160     | 23279  | NM_015231    | 968  | 0.26  | 1.59  | 0.30  | -0.78 | -1.58 | -1.63 | 3.62 | 4.18  | 2.93 | 2.16  | -3.99 | 10.73 |
| MAP2P10P1 | 8649   | NM_021970    | 969  | 1.24  | 2.54  | 2.52  | -1.00 | -1.55 | -0.91 | 1.65 | 4.93  | 4.14 | 6.30  | -1.45 | 10.72 |
| FF        | 215    | NM_01386     | 970  | 0.76  | 0.86  | 1.46  | -0.55 | -0.46 | 0.53  | 7.56 | 2.66  | 2.41 | 4.21  | -1.89 | 10.72 |
| CYP11B2   | 1585   | NM_000498    | 971  | 0.00  | 1.82  | 0.83  | -1.55 | -1.46 | -1.01 | 2.94 | 4.79  | 2.99 | 2.66  | -4.01 | 10.72 |
| ATP9V11   | 529    | NM_001039367 | 972  | 2.00  | 0.58  | 1.35  | -1.72 | -1.83 | -1.89 | 3.05 | 3.65  | 3.99 | 3.92  | -5.43 | 10.69 |
| MGC10900  | 8371   | NM_021947    | 973  | 1.48  | 1.07  | 1.46  | -0.40 | -0.95 | -0.56 | 5.31 | 1.87  | 2.66 | 2.86  | -2.27 | 10.68 |
| TAS2R13   | 50838  | NM_023920    | 974  | -0.16 | 0.38  | -0.42 | -2.25 | -2.68 | -1.58 | 3.95 | 5.93  | 0.77 | -0.20 | -4.50 | 10.66 |
| TSAP4     | 55240  | NM_001008410 | 975  | 3.74  | 1.32  | 1.79  | -0.40 | -0.37 | -0.67 | 5.74 | 1.46  | 3.44 | 6.86  | -1.44 | 10.64 |
| NRAS5E    | 6309   | NM_001008410 | 976  | -1.13 | -0.31 | 1.04  | -0.99 | -0.82 | -1.55 | 4.90 | 4.65  | 1.49 | -1.49 | -2.55 | 10.63 |
| MGC10646  | 84779  | NM_049704    | 977  | 0.69  | 2.35  | -0.08 | -1.53 | -1.30 | -1.07 | 2.42 | 6.83  | 1.37 | 2.95  | -3.90 | 10.62 |
| KISS1     | 3814   | NM_0020256   | 978  | -0.97 | -1.04 | -0.58 | -2.39 | -2.12 | -2.65 | 1.41 | 2.01  | 1.79 | -2.59 | -7.16 | 10.62 |
| LOC388701 | 889701 | NM_001019979 | 979  | 0.71  | 0.89  | 0.64  | -1.15 | -1.03 | -1.22 | 3.51 | 4.11  | 2.99 | 2.25  | -3.40 | 10.62 |
| SNRK      | 54861  | NM_017719    | 980  | 5.26  | 4.57  | 3.32  | 0.85  | 0.72  | 0.27  | 2.94 | 4.67  | 3.01 | 13.05 | 1.84  | 10.62 |
| KCN3C     | 3748   | NM_004977    | 981  | 2.97  | -0.02 | 1.63  | -1.68 | -1.34 | -1.39 | 6.15 | 1.39  | 3.06 | 4.58  | -4.41 | 10.60 |
| NO2A2     | 51706  | NM_016243    | 982  | -0.67 | -0.55 | 0.48  | -2.37 | -2.01 | -1.70 | 3.93 | 2.66  | 4.01 | -0.74 | -6.08 | 10.60 |
| NR1L7     | 63075  | NM_002061    | 983  | 1.38  | 0.45  | 0.35  | -1.69 | -1.21 | -0.39 | 6.80 | 2.30  | 1.49 | 2.18  | -0.69 | 10.59 |
| HEY2      | 23493  | NM_012259    | 984  | 1.68  | 1.77  | 0.67  | -1.25 | -1.16 | -1.32 | 3.13 | 3.58  | 3.88 | 4.11  | -3.73 | 10.59 |
| HNA2      | 11348  | NM_007072    | 985  | 0.85  | 0.26  | 0.20  | -1.74 | -1.58 | -1.31 | 4.90 | 2.58  | 3.11 | 1.31  | -4.63 | 10.59 |
| MPHD01    | 80379  | NM_001033580 | 986  | 0.23  | 0.31  | 1.18  | -1.99 | -1.63 | -1.73 | 4.38 | 3.67  | 2.54 | 1.72  | -3.36 | 10.59 |
| LOC130940 | 130940 | NM_138803    | 987  | 3.29  | 2.49  | 2.32  | -0.54 | -0.67 | -0.19 | 5.26 | 2.29  | 3.04 | 8.09  | -1.40 | 10.59 |
| STX1A     | 6804   | NM_004603    | 988  | -0.10 | 0.53  | 0.64  | -1.99 | -1.58 | -1.92 | 2.75 | 3.96  | 3.87 | 1.07  | -5.50 | 10.59 |
| STAR7     | 56930  | NM_119267    | 989  | 1.90  | 3.84  | 2.41  | -0.51 | -1.12 | -0.89 | 1.93 | 4.98  | 3.67 | 8.15  | -2.52 | 10.58 |
| CAPK6     | 827    | NM_004289    | 990  | 4.48  | 2.17  | 3.06  | -1.00 | -1.30 | -0.23 | 4.09 | 3.71  | 2.79 | 9.71  | -0.53 | 10.58 |
| GLI3      | 2737   | NM_000168    | 991  | 2.21  | 2.60  | 3.67  | -0.30 | -0.45 | 0.05  | 3.74 | 2.76  | 4.08 | 8.47  | -0.70 | 10.58 |
| SDR1      | 27020  | NM_017455    | 992  | 2.23  | 1.43  | 2.96  | -1.35 | -0.92 | -0.87 | 4.43 | 2.62  | 3.53 | 6.62  | -1.34 | 10.58 |
| LOC318645 | 23865  | NM_001009009 | 993  | 5.41  | 4.40  | 1.65  | -0.62 | -0.39 | -0.12 | 6.80 | 3.09  | 3.32 | 11.86 | -1.54 | 10.58 |
| SLC15A2   | 6565   | NM_021082    | 994  | 4.47  | 3.44  | 2.65  | -0.56 | -0.68 | 0.37  | 3.92 | 4.89  | 1.73 | 10.56 | -0.86 | 10.54 |
| TCF7L1    | 83439  | NM_031283    | 995  | 1.34  | 0.71  | 0.94  | -1.13 | -1.36 | -0.65 | 4.93 | 2.27  | 3.34 | 2.98  | -3.14 | 10.54 |
| HST3H4    | 8370   | NM_001004548 | 996  | 3.86  | 2.35  | 1.87  | -1.89 | -1.13 | -0.70 | 4.53 | 2.89  | 3.21 | 6.05  | -2.64 | 10.54 |
| LUCA      | 55075  | NM_018003    | 997  | 2.41  | 4.93  | 3.61  | -0.52 | -0.58 | 0.00  | 3.36 | 4.26  | 2.52 | 10.95 | -1.09 | 10.54 |
| C19ORF2   | 8725   | NM_134447    | 998  | 2.04  | 1.72  | 1.67  | -1.22 | -1.23 | -0.96 | 4.05 | 3.52  | 2.96 | 5.42  | -3.41 | 10.53 |
| FOH1A1    | 5150   | NM_000206    | 999  | 3.97  | 2.50  | 2.88  | -0.77 | -0.73 | -0.42 | 4.38 | 3.46  | 2.69 | 9.34  | -1.92 | 10.53 |
| MDR2      | 5112   | NM_016256    | 1000 | 1.20  | 1.70  | 1.04  | -1.40 | -1.21 | -0.63 | 3.78 | 3.72  | 3.69 | 3.86  | -3.36 | 10.53 |
| FLI1044   | 54540  | NM_019057    | 1001 | 1.64  | 0.81  | 1.17  | -1.33 | -1.82 | -1.50 | 3.54 | 3.81  | 3.17 | 3.57  | -4.65 | 10.52 |
| MALH2     | 3028   | NM_001037811 | 1002 | 0.67  | 0.40  | 0.77  | -1.87 | -1.79 | -1.22 | 3.93 | 4.05  | 2.55 | 1.84  | -4.88 | 10.52 |
| 1088      | 1088   | NM_001023285 | 1003 | 0.28  | 1.04  | 1.68  | -1.59 | -1.24 | -0.69 | 3.51 | 2.69  | 0.71 | 9.00  | -1.71 | 11.11 |
| NRAS      | 4893   | NM_002524    | 1004 | -0.12 | -0.88 | 0.68  | -2.39 | -2.07 | -1.94 | 3.81 | 1.63  | 5.05 | -0.31 | -6.41 | 10.50 |
| C10RF40   | 14945  | NM_198149    | 1005 | 3.12  | 0.90  | 3.16  | -1.32 | -0.72 | -0.50 | 5.37 | 1.27  | 3.86 | 7.19  | -2.53 | 10.50 |
| 1125      | 1125   | NM_0010225   | 1006 | -0.80 | 1.06  | 1.47  | -1.60 | -1.40 | -1.27 | 3.46 | 2.67  | 3.84 | 2.33  | -1.99 | 10.49 |
| GD15      | 9518   | NM_004864    | 1007 | 0.54  | 1.19  | 2.93  | -1.24 | -1.11 | -1.20 | 0.73 | 3.50  | 6.24 | 4.65  | -3.55 | 10.47 |
| SAP18     | 10284  | NM_005870    | 1008 | 0.10  | 0.96  | -0.02 | -0.94 | -1.61 | -0.88 | 2.50 | 6.11  | 1.86 | 10.33 | -1.44 | 10.47 |
| PUR2E     | 5434   | NM_002995    | 1009 | -0.03 | -0.04 | -1.01 | -2.51 | -2.00 | -2.39 | 4.25 | 3.95  | 2.26 | -1.02 | -6.90 | 10.47 |
| DCM       | 493    | NM_006188    | 1010 | 1.09  | 1.01  | 0.49  | -1.61 | -1.40 | -1.21 | 3.91 | 2.17  | 3.41 | 3.59  | -4.33 | 10.47 |
| TM1M3     | 26517  | NM_012458    | 1011 | -1.10 | 1.70  | 1.78  | -2.02 | -2.35 | -1.71 | 0.09 | 5.29  | 5.07 | 2.38  | -0.80 | 10.46 |
| CCD20     | 991    | NM_001255    | 1012 | 1.84  | 0.85  | 3.76  | -0.42 | -1.00 | -0.60 | 3.43 | 2.96  | 4.07 | 6.46  | -2.03 | 10.46 |
| 16254     | 16254  | NM_0010282   | 1013 | 0.46  | 1.91  | 1.52  | -1.05 | -1.21 | -0.90 | 4.44 | 1.51  | 2.51 | 2.06  | -4.10 | 10.45 |
| GTF3C2    | 2976   | NM_00103521  | 1014 | 1.89  | 1.36  | 1.80  | -0.80 | -0.83 | -1.18 | 2.50 | 2.73  | 5.22 | 5.05  | -2.81 | 10.45 |
| WMD13     | 144453 | NM_152439    | 1015 | 1.45  | 0.78  | 0.79  | -1.46 | -1.57 | -1.19 | 4.09 | 3.03  | 3.33 | 3.01  | -4.23 | 10.45 |
| TEAD2     | 846    | NM_001009009 | 1016 | 0.47  | 0.69  | 0.17  | -0.83 | -0.72 | -0.44 | 3.22 | 4.64  | 3.99 | 4.99  | -6.02 | 10.45 |
| GD10      | 2662   | NM_004962    | 1017 | 1.17  | 1.27  | 0.44  | -1.38 | -1.96 | -1.70 | 1.02 | 5.71  | 3.71 | 1.54  | -5.04 | 10.44 |
| FLI0292   | 55110  | NM_018048    | 1018 | 0.54  | 0.73  | 0.89  | -1.27 | -1.37 | -1.14 | 3.80 | 4.11  | 2.52 | 2.16  | -3.78 | 10.43 |
| KAM3      | 3383   | NM_000201    | 1019 | 2.51  | 1.71  | 2.58  | -0.23 | -0.49 | 0.00  | 1.98 | 7.07  | 1.38 | 10.61 | -0.73 | 10.43 |
| LOC199920 | 399920 | NM_001004003 | 1020 | 1.70  | 1.08  | 1.00  | -1.47 | -1.50 | -1.27 | 4.47 | 2.72  | 3.79 | 3.79  | -4.47 | 10.41 |
| PPP2R5A   | 5525   | NM_006243    | 1021 | 1.78  | 0.00  | 1.09  | -1.07 | -1.54 | -1.34 | 4.36 | 1.58  | 4.46 | 2.87  | -3.95 | 10.40 |
| DOR1      | 1642   | NM_001923    | 1022 | -0.19 | 0.20  | 0.08  | -1.90 | -1.67 | -1.73 | 4.62 | 3.59  | 2.19 | 0.09  | -5.29 | 10.40 |
| SRF11     | 9395   | NM_000768    | 1023 | 1.78  | 1.21  | 1.76  | -1.17 | -1.03 | -1.17 | 3.17 | 4.02  | 3.24 | 3.74  | -2.83 | 10.39 |
| AMPAC5    | 51433  | NM_016237    | 1024 | 5.47  | 4.27  | 4.82  | -0.71 | -0.40 | -0.87 | 4.32 | 2.53  | 3.51 | 14.57 | -1.97 | 10.37 |
| SELO      | 83642  | NM_031454    | 1025 | 1.82  | 0.58  | 1.48  | -1.44 | -1.72 | -0.99 | 4.49 | 2.48  | 3.40 | 3.88  | -4.14 | 10.37 |
| 1P01      | 33859  | NM_001030892 | 1026 | 1.42  | 0.81  | 0.81  | -1.57 | -1.36 | -1.65 | 5.11 | 2.87  | 2.34 | 2.96  | -3.99 | 10.34 |
| TPR1      | 23590  | NM_014317    | 1027 | 0.08  | -0.09 | 0.76  | -2.01 | -1.69 | -1.59 | 2.80 | 2.67  | 4.87 | 0.75  | -5.30 | 10.34 |
| SOX4      | 6659   | NM_003107    | 1028 | 1.26  | 1.98  | 0.68  | -0.81 | -1.03 | -1.27 | 3.17 | 3.58  | 3.58 | 3.91  | -1.11 | 10.33 |
| SOX5      | 6660   | NM_178010    | 1029 | 1.76  | 2.85  | 3.31  | -1.29 | -1.22 | -0.16 | 1.69 | 6.98  | 1.66 | 7.92  | -2.35 | 10.32 |
| 1081A1    | 3381   | NM_0010239   | 1030 | 0.16  | 0.45  | 1.14  | -1.01 | -0.65 | -0.54 | 1.01 | 6.15  | 4.54 | 3.75  | -0.96 | 10.32 |
| CSTB      | 1476   | NM_000100    | 1031 | -0.86 | 0.00  | -0.25 | -2.49 | -2.59 | -1.82 | 2.69 | 4.62  | 3.00 | -1.11 | -6.90 | 10.31 |
| C19ORF7   | 23211  | NM_015168    | 1032 | 2.74  | 3.16  | 5.27  | -0.27 | 2.37  | 0.88  | 5.28 | 0.47  | 4.54 | 11.17 | 2.98  | 10.30 |
| SN1       | 664    | NM_024955    | 1033 | 2.54  | 1.64  | 1.57  | -0.64 | -0.52 | -0.54 | 2.27 | 2.94  | 1.94 | 3.80  | -1.76 | 10.29 |
| HMGCL1    | 54511  | NM_019036    | 1034 | 4.15  | 2.60  | 1.88  | -0.50 | -0.42 | -0.96 | 4.06 | 3.43  | 2.80 | 8.62  | -1.88 | 10.29 |
| MUSTN1    | 389125 | NM_205863    | 1035 | -1.13 | -1.03 | 7.51  | -2.16 | -1.87 | -1.77 | 1.11 | -0.21 | 9.39 | 5.35  | -5.80 | 10.29 |
| 2289      | 2289   | NM_0010216   | 1036 | 2.25  | 2.06  | 1.20  | -0.62 | -0.25 | -0.25 | 3.42 | 3.52  | 3.62 | 3.42  | -2.30 | 10.28 |
| FLJ3863   | 91574  | NM_152269    | 1037 | 1.16  | 1.92  | 0.98  | -1.01 | -1.91 | -1.53 | 1.97 | 5.34  | 2.97 | 4.06  | -4.45 | 10.28 |
| SLAMF6    | 114836 | NM_052931    | 1038 | 1.23  | 2.14  | 1.88  | -1.42 | -1.41 | -1.07 | 3.28 | 4.24  | 2.76 | 5.22  | -3.90 | 10.28 |
| IGFBP3    | 93185  | NM_052968    | 1039 | -0.23 | 3.15  | 1.10  | -1.36 | -1.27 | -1.79 | 1.83 | 4.23  | 4.21 | 4.00  | -4.43 | 10.28 |
| LOC113444 | 113444 | NM_138428    | 1040 | 0.97  | 0.43  | 0.79  | -0.43 | -0.43 | -0.43 | 3.25 | 2.43  | 4.56 | 3.13  | -3.24 | 10.27 |
| FLJ3901   | 126410 | NM_173483    | 1041 | 1.70  | 1.94  | 0.86  | -1.11 | -1.18 | -1.24 | 2.97 | 3.61  | 3.67 | 4.51  | -3.53 | 10.25 |
| SNURF1    | 56670  | NM_039350    | 1042 | 0.82  | 1.57  | 2.31  | -0.01 | -0.95 | -0.49 | 1.42 | 5.21  | 3.62 | 4.70  | -1.45 | 10.25 |
| TRN15     | 2688   | NM_0010375   | 1043 | 0.98  | 1.21  | 1.11  | -0.82 | -0.82 | -0.82 | 5.42 | 3.63  | 3.42 | 2.29  | -1.68 | 10.25 |
| BMP8A     | 35300  | NM_181809    | 1044 | 1.66  | 0.34  | 0.69  | -1.72 | -1.39 | -1.45 | 6.02 | 1.16  | 3.07 |       |       |       |

|             |        |              |      |       |       |       |       |       |       |      |       |      |       |       |      |
|-------------|--------|--------------|------|-------|-------|-------|-------|-------|-------|------|-------|------|-------|-------|------|
| BOO02942    | 91889  | NM_004320    | 1127 | 1.22  | 2.10  | 2.34  | -0.16 | -0.13 | -1.06 | 1.20 | 3.15  | 5.35 | 5.66  | -1.35 | 9.69 |
| E1002       | 170591 | NM_130772    | 1128 | 1.12  | 0.68  | 0.65  | -1.40 | -1.40 | -0.91 | 4.80 | 2.60  | 4.80 | 3.70  | -1.38 | 9.68 |
| FAM56A      | 116228 | NM_198076    | 1129 | 4.16  | 1.57  | 1.99  | -0.01 | 0.22  | -0.24 | 4.45 | 3.05  | 2.17 | 8.71  | -0.02 | 9.67 |
| AARS        | 57505  | NM_020745    | 1130 | 1.59  | 1.77  | 0.87  | -1.14 | -1.27 | -0.78 | 3.98 | 3.60  | 2.09 | 4.22  | -3.18 | 9.66 |
| RALG52      | 55103  | NM_018337    | 1131 | 1.82  | 1.16  | 0.29  | -0.86 | 0.13  | -0.49 | 5.04 | 2.39  | 2.21 | 3.27  | -1.22 | 9.64 |
| PTPM        | 5790   | NM_003833    | 1132 | 0.78  | 0.78  | 1.35  | -0.58 | -0.58 | -0.42 | 0.85 | 4.25  | 3.85 | 5.11  | -1.46 | 9.64 |
| HNRPU       | 3192   | NM_004501    | 1133 | 2.60  | 4.07  | 3.22  | 0.09  | -0.27 | -0.77 | 1.00 | 3.99  | 4.64 | 9.89  | -0.96 | 9.63 |
| FBZ1        | 1967   | NM_001414    | 1134 | 2.87  | 3.95  | 3.45  | 0.45  | 0.58  | 0.51  | 4.30 | 2.81  | 2.53 | 10.27 | 1.53  | 9.63 |
| LOC402682   | 402682 | NM_00105922  | 1135 | 1.41  | 1.07  | 0.86  | -0.17 | -0.17 | -0.17 | 2.68 | 3.22  | 3.77 | 9.33  | 1.43  | 9.63 |
| MCS5987     | 145553 | NM_138476    | 1136 | 3.87  | 4.25  | 2.94  | -0.37 | -0.49 | 0.14  | 4.70 | 3.32  | 1.60 | 11.05 | -0.72 | 9.63 |
| CDCA4A      | 8556   | NM_033313    | 1137 | -0.16 | -0.47 | 0.35  | -1.90 | -2.75 | -2.03 | 2.78 | 3.11  | 3.75 | -0.28 | -6.68 | 9.63 |
| PHW42       | 7954   | NM_005405    | 1138 | 3.41  | 4.85  | 3.58  | -0.40 | -0.40 | -0.40 | 3.20 | 4.44  | 1.80 | 11.04 | -0.22 | 9.63 |
| CCNF        | 899    | NM_001761    | 1139 | 9.65  | 2.74  | 4.37  | 0.00  | 0.19  | 0.01  | 3.97 | 1.78  | 3.86 | 11.95 | 0.20  | 9.61 |
| 2873        | 1140   | 8.44         | 4.45 | 3.45  | 1.21  | 1.24  | 1.06  | 4.19  | 2.25  | 3.17 | 16.34 | 3.50 | 9.60  | 9.60  |      |
| SETD1A      | 9739   | NM_014712    | 1141 | 2.48  | 1.80  | 1.70  | -1.29 | -1.25 | -1.23 | 3.86 | 2.67  | 3.08 | 5.99  | -3.77 | 9.60 |
| MUT         | 4594   | NM_000255    | 1142 | 0.28  | 0.16  | 0.26  | -1.76 | -1.77 | -1.72 | 2.51 | 3.39  | 3.70 | 0.37  | -2.25 | 9.60 |
| SORCS2      | 57537  | NM_020777    | 1143 | 0.07  | 0.11  | 1.01  | -1.33 | -1.51 | -1.37 | 1.68 | 2.87  | 5.05 | 1.20  | -4.21 | 9.60 |
| NN          | 51599  | NM_182945    | 1144 | 4.20  | 5.01  | 3.90  | -0.69 | 1.83  | 0.60  | 5.83 | 2.67  | 1.10 | 13.12 | 1.74  | 9.60 |
| BSM         | 102    | NM_203515    | 1145 | 1.87  | 0.93  | 2.85  | -0.69 | -1.27 | -0.66 | 3.00 | 2.13  | 4.46 | 5.65  | 0.62  | 9.59 |
| SRS52L      | 79644  | NM_024592    | 1146 | 0.49  | 1.24  | 1.34  | -1.03 | -1.56 | -1.22 | 2.79 | 3.12  | 3.68 | 3.07  | -3.81 | 9.58 |
| ZNF558      | 148156 | NM_144693    | 1147 | -1.19 | -0.45 | -0.45 | -2.28 | -2.49 | -2.10 | 0.07 | 6.31  | 3.20 | -2.09 | -6.87 | 9.58 |
| CSG         | 114375 | NM_134308    | 1148 | 4.48  | -0.29 | 3.26  | -0.78 | 1.21  | -0.97 | 5.68 | -0.50 | 4.39 | 7.45  | -0.55 | 9.57 |
| RAB18       | 81876  | NM_030981    | 1149 | 0.33  | 1.83  | 0.73  | -1.44 | -1.44 | -1.22 | 0.89 | 6.94  | 1.74 | 2.89  | -4.10 | 9.57 |
| RAD1        | 5810   | NM_001033673 | 1150 | 4.78  | 5.65  | 3.12  | 0.00  | 0.18  | -0.65 | 2.81 | 3.54  | 3.21 | 13.56 | -0.47 | 9.56 |
| GALNT4      | 174758 | NM_198516    | 1151 | 2.48  | 3.88  | 1.58  | -1.13 | -0.75 | -0.53 | 4.81 | 3.27  | 1.48 | 7.94  | -2.39 | 9.56 |
| LMO3        | 79792  | NM_024712    | 1152 | 2.50  | 0.71  | 1.42  | -1.00 | -0.96 | -0.47 | 5.31 | 2.22  | 2.03 | 4.63  | -0.43 | 9.56 |
| NR2F6       | 2063   | NM_005234    | 1153 | 1.19  | 5.60  | 1.01  | -0.75 | -0.35 | -0.87 | 3.82 | 2.15  | 3.58 | 7.80  | -1.97 | 9.56 |
| PFNA1       | 3439   | NM_024013    | 1154 | 3.29  | 2.12  | 4.03  | -0.94 | -1.09 | -0.89 | 3.44 | 2.50  | 3.62 | 9.44  | -2.93 | 9.55 |
| SCLEC1      | 11336  | NM_023277    | 1155 | 3.51  | 1.48  | 1.33  | -1.72 | -1.72 | -1.72 | 3.94 | 1.44  | 1.72 | 9.33  | 1.25  | 9.54 |
| CTSD        | 1509   | NM_001909    | 1156 | 3.95  | 3.59  | 2.90  | -0.96 | -0.65 | -0.06 | 4.22 | 3.44  | 1.86 | 10.44 | -1.54 | 9.52 |
| TSFANB      | 7103   | NM_004616    | 1157 | 3.58  | 2.31  | 0.69  | -0.88 | -0.86 | -0.96 | 4.42 | 3.72  | 1.37 | 6.58  | -2.70 | 9.51 |
| SLC7A1      | 654    | NM_003845    | 1158 | 6.14  | 0.33  | 0.69  | -1.26 | -1.24 | -1.26 | 3.22 | 2.38  | 2.69 | 9.56  | -6.28 | 9.50 |
| VHL         | 391104 | NM_00104319  | 1159 | 1.22  | 1.94  | 1.62  | -1.44 | -1.03 | -1.33 | 3.17 | 3.02  | 3.30 | 3.78  | -3.59 | 9.50 |
| RUTBC1      | 9905   | NM_014853    | 1160 | 0.00  | 3.10  | 0.92  | -0.33 | -0.66 | -0.56 | 0.70 | 8.12  | 0.67 | 4.01  | -0.44 | 9.49 |
| RBM2        | 5939   | NM_002898    | 1161 | 0.73  | 1.30  | 0.16  | -1.23 | -1.92 | -1.50 | 2.53 | 5.57  | 1.36 | 2.20  | -4.65 | 9.47 |
| SOX4        | 50507  | NM_016931    | 1162 | 1.20  | 1.01  | 0.19  | -0.89 | -1.57 | -0.91 | 1.56 | 4.45  | 1.01 | 7.40  | 3.37  | 9.47 |
| TRPV3       | 162514 | NM_145068    | 1163 | 1.88  | 1.97  | 2.67  | -0.53 | -0.87 | -0.96 | 1.51 | 3.60  | 4.34 | 6.52  | -2.37 | 9.46 |
| CDIPT       | 10423  | NM_006319    | 1164 | 3.08  | 2.38  | 2.07  | -1.17 | -0.37 | -0.42 | 6.45 | 2.41  | 0.60 | 7.52  | -1.12 | 9.45 |
| TRAPPC1     | 5845   | NM_012110    | 1165 | 1.20  | 0.80  | 1.24  | -1.20 | -1.20 | -1.20 | 3.64 | 2.44  | 2.80 | 6.30  | -1.20 | 9.45 |
| NBP         | 83966  | NM_013466    | 1166 | 2.62  | 2.14  | 1.89  | -1.27 | -0.29 | -0.68 | 5.40 | 1.68  | 2.36 | 6.65  | -2.23 | 9.44 |
| DATF1       | 11083  | NM_080796    | 1167 | 2.96  | 2.26  | 1.95  | -0.84 | -1.01 | -1.14 | 2.97 | 3.18  | 3.29 | 7.17  | -2.98 | 9.44 |
| PHG2        | 9148   | NM_026720    | 1168 | 0.25  | 0.23  | 1.78  | -1.86 | -2.24 | -2.24 | 1.56 | 4.58  | 1.11 | 2.26  | -5.14 | 9.44 |
| IGSF9       | 57549  | NM_020789    | 1169 | 1.42  | 4.52  | 1.55  | -0.70 | -0.70 | -0.59 | 1.54 | 5.95  | 1.94 | 7.49  | -1.99 | 9.44 |
| LOC116236   | 116236 | NM_198147    | 1170 | 2.68  | 0.03  | 4.17  | 0.76  | -0.05 | -0.99 | 3.00 | 0.08  | 6.35 | 6.88  | -0.28 | 9.43 |
| LOC189699   | 389699 | NM_00112649  | 1171 | 1.34  | -0.32 | 0.47  | -1.39 | -1.52 | -1.24 | 3.94 | 3.01  | 2.47 | 1.49  | -4.16 | 9.42 |
| PHB         | 524    | NM_000234    | 1172 | 0.46  | 0.48  | 1.20  | -0.76 | -1.57 | -0.96 | 1.57 | 5.09  | 2.67 | 3.23  | -0.80 | 9.40 |
| RPL1-493K23 | 645974 | NM_00104206  | 1173 | -0.48 | -0.03 | -0.62 | -2.23 | -2.27 | -2.47 | 2.49 | 4.00  | 2.91 | -1.13 | -6.97 | 9.40 |
| RS4         | 8471   | NM_030304    | 1174 | 1.68  | 1.90  | 0.57  | -1.39 | -1.03 | -1.04 | 6.02 | 2.24  | 1.14 | 4.15  | -3.46 | 9.39 |
| LOC122441   | 122441 | NM_000252    | 1175 | 0.71  | 1.63  | 1.63  | -1.62 | -1.62 | -1.62 | 2.93 | 2.93  | 2.93 | 2.93  | -1.62 | 9.38 |
| SLC16A3     | 91233  | NM_004207    | 1176 | 0.62  | 0.65  | 2.97  | -1.79 | -1.16 | -1.53 | 2.49 | 2.15  | 4.75 | 4.24  | -4.48 | 9.38 |
| PARC        | 23113  | NM_015089    | 1177 | 0.68  | -1.07 | -1.18 | -1.91 | -2.32 | -2.34 | 5.00 | 0.92  | 3.45 | -0.58 | -6.57 | 9.38 |
| IFP2        | 1074   | NM_010510    | 1178 | 0.66  | 0.46  | 0.41  | -1.64 | -0.85 | -1.01 | 4.58 | 1.11  | 3.44 | 2.44  | -1.54 | 9.37 |
| LOC3        | 8985   | NM_001084    | 1179 | -0.20 | -0.25 | -0.97 | -2.23 | -2.15 | -2.25 | 4.70 | 3.25  | 1.42 | -1.43 | -6.64 | 9.37 |
| USP36       | 57602  | NM_025090    | 1180 | -0.07 | -0.40 | 0.88  | -1.99 | -2.04 | -1.70 | 3.46 | 1.22  | 4.69 | 0.42  | -5.72 | 9.36 |
| CHORF8      | 28504  | NM_207117    | 1181 | 0.10  | 0.37  | -0.15 | -1.41 | -1.43 | -1.80 | 1.75 | 2.74  | 4.88 | -0.41 | -7.70 | 9.36 |
| HTFAP       | 8451   | NM_024843    | 1182 | 1.48  | 1.33  | 1.64  | -0.44 | -0.52 | -1.02 | 3.44 | 3.61  | 3.40 | 8.45  | -2.76 | 9.36 |
| LOC20245    | 54863  | NM_017723    | 1183 | 2.35  | 2.88  | 2.57  | -0.65 | -0.29 | -0.37 | 3.14 | 2.35  | 3.85 | 7.79  | -3.11 | 9.35 |
| LOC1        | 1009   | NM_001797    | 1184 | 4.22  | 2.21  | 2.61  | -0.11 | -0.18 | -0.54 | 5.14 | 1.90  | 2.30 | 9.04  | -0.83 | 9.34 |
| STRP        | 55142  | NM_018887    | 1185 | 1.80  | 1.84  | 1.24  | -1.44 | -1.59 | -1.78 | 4.58 | 2.78  | 3.66 | 6.88  | -2.23 | 9.34 |
| RHBDL1      | 9028   | NM_003961    | 1186 | 0.54  | 0.11  | 2.06  | -1.71 | -1.17 | -0.82 | 4.75 | 3.00  | 1.58 | 2.70  | -7.70 | 9.33 |
| NPC11       | 29881  | NM_013389    | 1187 | 1.01  | -0.29 | -0.18 | -1.42 | -1.82 | -1.11 | 4.66 | 1.66  | 3.01 | 0.53  | -4.36 | 9.33 |
| RHMD2A      | 5558   | NM_020947    | 1188 | 1.35  | 3.26  | 1.93  | -1.30 | -1.30 | -1.30 | 2.16 | 5.04  | 2.13 | 5.70  | -1.69 | 9.33 |
| ABL6P2      | 64225  | NM_00113573  | 1189 | 3.31  | 1.63  | 0.95  | -1.30 | -0.32 | -0.34 | 6.19 | 1.90  | 1.23 | 5.89  | -1.96 | 9.32 |
| COORF165    | 154313 | NM_001031743 | 1190 | 5.57  | 3.25  | 2.34  | -0.83 | -0.62 | -0.23 | 4.77 | 3.11  | 1.44 | 11.15 | -1.68 | 9.32 |
| RHDL1       | 1801   | NM_001383    | 1191 | 2.12  | 2.54  | 0.99  | -1.31 | -0.67 | -0.84 | 4.26 | 3.87  | 1.19 | 5.65  | -2.83 | 9.32 |
| RH9L1       | 285    | NM_000299    | 1192 | 0.70  | 0.16  | 0.60  | -1.49 | -1.49 | -1.49 | 6.44 | 2.62  | 3.14 | 1.14  | -4.21 | 9.32 |
| FU13305     | 84140  | NM_032180    | 1193 | -0.21 | 1.45  | 5.05  | -1.63 | -0.62 | -1.20 | 2.26 | 0.70  | 6.34 | 6.29  | -3.44 | 9.30 |
| SYMPK       | 8189   | NM_004819    | 1194 | 0.31  | -0.34 | -0.44 | -2.09 | -1.96 | -2.37 | 3.80 | 3.36  | 2.34 | -0.47 | -6.42 | 9.30 |
| LOC148251   | 148251 | NM_000251    | 1195 | 0.08  | 0.25  | 1.47  | -1.49 | -1.49 | -1.49 | 2.44 | 4.47  | 2.67 | 1.51  | -5.00 | 9.30 |
| FGD4        | 121512 | NM_139241    | 1196 | 1.87  | 0.99  | 3.49  | -1.37 | -0.37 | -0.90 | 4.36 | 1.07  | 3.87 | 6.35  | -2.64 | 9.30 |
| LOC126248   | 126248 | NM_173479    | 1197 | -0.44 | 2.50  | -0.10 | -1.82 | -2.50 | -1.52 | 0.98 | 6.90  | 1.41 | 1.96  | -5.84 | 9.29 |
| CHORF28     | 2739   | NM_000472    | 1198 | 0.82  | -0.01 | 2.51  | -0.88 | -1.84 | -1.80 | 2.42 | 3.88  | 2.42 | 3.33  | -4.82 | 9.29 |
| PSARL       | 55486  | NM_00101839  | 1199 | 0.22  | 3.33  | 2.02  | -0.40 | -0.53 | -0.29 | 2.30 | 4.85  | 2.14 | 8.27  | -1.21 | 9.28 |
| PPP2R5E     | 5529   | NM_006246    | 1200 | 4.38  | 3.61  | 3.20  | 0.21  | -0.98 | -0.17 | 2.21 | 3.66  | 3.40 | 11.18 | -0.94 | 9.28 |
| ABCD1       | 215    | NM_000013    | 1201 | 0.34  | -0.53 | 1.15  | -2.33 | -1.40 | -1.20 | 5.92 | 0.58  | 2.77 | 0.65  | -4.99 | 9.27 |
| HNH3        | 14911  | NM_152495    | 1202 | 0.33  | 0.52  | 1.15  | -0.31 | -0.31 | -0.31 | 2.68 | 5.21  | 3.14 | 2.00  | -0.96 | 9.27 |
| CHORF2      | 9556   | NM_004894    | 1203 | 3.69  | 2.20  | 2.84  | -0.93 | 0.49  | -0.89 | 4.84 | 1.29  | 3.14 | 8.73  | -1.33 | 9.26 |
| CLN3        | 1182   | NM_001829    | 1204 | -0.12 | -0.73 | 0.08  | -2.21 | -0.98 | -1.25 | 4.75 | 1.24  | 3.26 | -0.77 | -4.44 | 9.26 |
| ABR2        | 1542   | NM_000224    | 1205 | 1.74  | 1.36  | 1.26  | -1.46 | -1.46 | -1.46 | 1.49 | 2.78  | 0.86 | 4.52  | -2.50 | 9.25 |
| SLC24A5     | 283652 | NM_205850    | 1206 | 4.93  | 2.15  | 1.60  | -0.16 | 0.42  | -0.94 | 5.30 | 0.77  | 3.15 | 8.68  | -0.37 | 9.22 |
| EDG2        | 1902   | NM_001401    | 1207 | -0.68 | -1.02 | 1.46  |       |       |       |      |       |      |       |       |      |



|             |        |              |      |       |       |       |       |       |       |       |       |       |       |       |      |
|-------------|--------|--------------|------|-------|-------|-------|-------|-------|-------|-------|-------|-------|-------|-------|------|
| KIA04885    | 9701   | NM_0146778   | 1289 | 5.82  | 4.08  | 2.51  | -0.31 | -0.13 | -0.37 | 4.12  | 2.82  | 1.91  | 12.41 | -0.81 | 8.85 |
| BC12        | 1597   | NM_000100    | 1290 | 1.68  | 0.86  | 0.24  | -0.47 | -0.42 | -0.80 | 2.93  | 1.89  | 2.84  | 1.17  | -1.47 | 8.85 |
| STVA        | 6811   | NM_003164    | 1291 | 0.49  | 0.91  | 0.26  | -1.47 | -1.19 | -1.08 | 3.08  | 4.62  | 1.13  | 1.14  | -3.74 | 8.83 |
| DEFAG       | 1671   | NM_001926    | 1292 | 4.95  | 1.80  | 2.26  | -0.21 | -0.30 | -0.38 | 4.74  | 2.63  | 1.47  | 9.02  | -0.88 | 8.83 |
| PH2         | 21278  | NM_171553    | 1293 | 0.78  | 0.24  | 0.35  | -0.37 | -0.52 | -1.33 | 2.55  | 1.77  | 4.50  | 1.37  | -1.61 | 8.82 |
| TR42        | 7185   | NM_002138    | 1294 | 1.46  | 1.19  | 1.41  | -0.91 | -1.01 | -2.60 | 7.16  | 0.60  | 1.92  | 4.70  | -0.62 | 8.82 |
| RG          | 9104   | NM_004683    | 1295 | 1.10  | 0.27  | -0.01 | -1.97 | -2.18 | -2.17 | 2.73  | 2.70  | 3.39  | 0.24  | -6.31 | 8.82 |
| UNQ9372     | 388364 | NM_206832    | 1296 | 3.63  | 3.75  | 1.62  | -0.31 | -0.37 | -1.25 | 2.27  | 3.44  | 3.12  | 8.99  | -1.94 | 8.82 |
| MGC12671    | 151230 | NM_145711    | 1297 | 2.91  | 1.32  | 0.61  | -0.91 | -0.86 | -0.51 | 3.00  | 1.22  | 1.32  | 10.41 | -1.11 | 8.82 |
| CAMG2A      | 815    | NM_171825    | 1298 | 1.10  | 1.21  | 0.61  | -0.86 | -0.70 | 0.31  | 3.46  | 4.11  | 1.24  | 2.91  | -1.23 | 8.81 |
| DAB2P       | 153900 | NM_138709    | 1299 | 0.68  | 2.23  | 1.50  | -1.04 | -1.21 | -1.21 | 1.86  | 5.01  | 1.94  | 4.40  | -3.46 | 8.81 |
| IGADAB02    | 11345  | NM_000325    | 1300 | 1.73  | 3.72  | 2.80  | -0.30 | -0.38 | -0.56 | 3.28  | 4.73  | 2.76  | 8.25  | -0.69 | 8.79 |
| NEUROG1     | 4762   | NM_006161    | 1301 | -0.31 | 1.83  | 1.09  | -2.43 | -1.95 | -1.04 | 0.90  | 6.50  | 1.39  | 2.61  | -5.43 | 8.79 |
| CECR5       | 27440  | NM_017829    | 1302 | 1.91  | 2.35  | 0.81  | 0.68  | -0.01 | 0.63  | 2.31  | 4.88  | 1.59  | 5.06  | 1.29  | 8.79 |
| ADA         | 100    | NM_000022    | 1303 | 2.15  | 2.68  | 1.17  | -0.42 | 0.27  | -0.55 | 3.44  | 3.34  | 2.00  | 6.00  | -0.70 | 8.78 |
| CDORF61     | 26123  | NM_00101840  | 1304 | 2.14  | 2.43  | 1.22  | 0.01  | -0.09 | 0.14  | 3.32  | 3.24  | 2.21  | 5.79  | 0.66  | 8.78 |
| BTBD14B     | 112939 | NM_052876    | 1305 | 0.52  | 0.03  | 2.21  | -1.16 | -0.28 | -0.07 | 3.01  | 1.40  | 4.36  | 2.76  | -1.51 | 8.77 |
| FLJ35834    | 154865 | NM_178827    | 1306 | -0.07 | -0.80 | 0.05  | -2.03 | -2.11 | -1.59 | 3.23  | 2.37  | 3.16  | -0.82 | -5.74 | 8.77 |
| HMT1        | 3094   | NM_005040    | 1307 | 2.23  | 2.13  | 1.66  | -1.03 | -0.89 | -1.33 | 2.53  | 2.56  | 2.66  | 6.02  | 3.25  | 8.76 |
| SPAP1       | 79368  | NM_138728    | 1308 | 4.43  | 2.79  | 2.05  | -0.40 | -0.62 | -0.45 | 4.55  | 2.87  | 1.34  | 9.28  | -1.47 | 8.75 |
| LOC345778   | 345778 | NM_00101891  | 1309 | 3.00  | 1.71  | 1.99  | -1.17 | -1.04 | -1.00 | 2.95  | 2.75  | 3.06  | 6.71  | -2.22 | 8.75 |
| GRM1        | 26585  | NM_011372    | 1310 | 5.43  | 4.42  | 2.40  | 0.04  | -0.49 | -0.45 | 3.11  | 3.55  | 2.08  | 12.26 | -0.91 | 8.74 |
| FLJ39061    | 165937 | NM_936920    | 1311 | 2.10  | 2.25  | 1.51  | -1.36 | -0.69 | -1.61 | 3.74  | 2.19  | 2.81  | 3.86  | -3.66 | 8.74 |
| ZNHT1       | 10467  | NM_006349    | 1312 | -0.23 | 0.70  | 0.12  | -1.74 | -1.74 | -1.28 | 2.35  | 1.19  | 2.20  | 0.59  | -4.76 | 8.74 |
| NMFL14      | 4676   | NM_005969    | 1313 | 4.34  | 2.85  | 0.96  | -1.04 | -1.21 | -0.79 | 4.55  | 3.63  | 0.57  | 8.14  | -3.04 | 8.74 |
| TCR11       | 692    | NM_005648    | 1314 | 0.71  | 2.73  | 0.06  | -0.75 | -1.12 | -0.75 | 2.48  | 5.29  | 0.97  | 3.39  | -2.62 | 8.74 |
| OR131       | 392109 | NM_001004487 | 1315 | 0.50  | -0.14 | 0.89  | -1.52 | -1.81 | -1.55 | 3.24  | 1.97  | 3.52  | 1.26  | -4.87 | 8.74 |
| ARL108      | 127829 | NM_138795    | 1316 | 0.96  | 0.37  | 0.96  | -1.05 | -0.78 | -0.82 | 2.95  | 3.40  | 2.39  | 2.29  | -2.65 | 8.74 |
| AF          | 11326  | NM_171296    | 1317 | 1.16  | 1.16  | 1.16  | -4.53 | -1.15 | -1.15 | 4.53  | 1.15  | 1.15  | 8.01  | 2.09  | 8.73 |
| NBS1        | 4683   | NM_002485    | 1318 | 0.43  | 0.38  | 0.29  | -0.23 | -0.78 | -1.17 | 0.74  | 4.81  | 1.18  | 1.10  | -2.18 | 8.73 |
| LOC129521   | 129521 | NM_001013177 | 1319 | 2.33  | 1.80  | 3.78  | -1.06 | -1.15 | -0.57 | 2.65  | 2.36  | 3.72  | 7.91  | -2.78 | 8.72 |
| ZNF549      | 147698 | NM_000102    | 1320 | -0.25 | -0.10 | -0.10 | -1.57 | -1.42 | -1.57 | 2.52  | 4.65  | -0.46 | -4.67 | -0.27 | 8.72 |
| MAPK43      | 5603   | NM_002754    | 1321 | 2.44  | 1.55  | 1.30  | -0.58 | -0.72 | -0.83 | 2.17  | 3.97  | 2.68  | 6.29  | -2.13 | 8.72 |
| ITC7A       | 57217  | NM_020458    | 1322 | 3.64  | 0.90  | 2.57  | -1.46 | -1.07 | -1.09 | 1.89  | 2.34  | 4.50  | 7.12  | -3.62 | 8.71 |
| LOC27566M03 | 81615  | NM_038923    | 1323 | -0.56 | 0.20  | 0.33  | -1.95 | -1.76 | -1.18 | 2.51  | 3.34  | 3.05  | -0.03 | -4.89 | 8.71 |
| SOX11       | 8928   | NM_000293    | 1324 | 3.16  | 3.24  | 3.24  | -0.92 | -0.61 | -0.61 | 5.52  | 1.82  | 2.92  | 6.92  | -3.77 | 8.71 |
| FAM49B      | 51571  | NM_016623    | 1325 | 4.52  | 3.47  | 2.14  | 0.26  | -0.53 | -0.54 | 2.85  | 3.65  | 2.21  | 10.13 | -0.81 | 8.71 |
| DAM1        | 23002  | NM_014992    | 1326 | 4.94  | 4.93  | 3.57  | 0.01  | 0.60  | -0.12 | 2.77  | 2.45  | 3.48  | 13.44 | -0.49 | 8.70 |
| SUPT169     | 682    | NM_000169    | 1327 | 1.51  | 2.28  | 1.88  | -1.02 | -1.02 | -1.02 | 4.80  | 2.02  | 2.65  | 6.02  | 0.62  | 8.69 |
| KIA1604     | 57703  | NM_020943    | 1328 | -0.76 | -1.28 | -1.15 | -2.25 | -2.60 | -2.58 | 1.76  | 3.30  | 3.63  | -3.18 | -7.43 | 8.69 |
| PMPCB       | 9512   | NM_004729    | 1329 | 0.52  | -0.32 | 0.23  | -1.62 | -1.69 | -1.75 | 3.56  | 1.82  | 3.31  | 0.43  | -5.05 | 8.69 |
| 7919        | 7919   | NM_00101515  | 1330 | 17.16 | 27.67 | 17.41 | 1.16  | 4.86  | 3.46  | 17.16 | 27.67 | 17.41 | 62.23 | 12.41 | 8.68 |
| TAS2A5      | 25929  | NM_176886    | 1331 | 2.69  | 2.31  | 1.02  | -0.73 | -0.08 | -0.48 | 4.99  | 1.90  | 1.78  | 6.03  | -1.28 | 8.68 |
| KIAA1007    | 23019  | NM_206999    | 1332 | 1.60  | 1.35  | 0.20  | -1.55 | -1.68 | -1.35 | 3.38  | 3.68  | 1.61  | 3.15  | -4.58 | 8.67 |
| SCN1A       | 6423   | NM_006020    | 1333 | 3.20  | 2.27  | 2.12  | -0.52 | -0.50 | -0.68 | 2.73  | 2.85  | 3.09  | 7.59  | -1.70 | 8.67 |
| PMP         | 562    | NM_180979    | 1334 | 0.35  | 1.86  | 4.09  | -1.50 | -1.40 | -1.40 | 0.83  | 3.87  | 6.00  | 4.00  | -3.55 | 8.67 |
| TRPC1       | 7220   | NM_003304    | 1335 | 0.94  | -0.43 | -0.07 | -1.79 | -1.46 | -1.37 | 5.53  | 1.05  | 2.07  | 0.44  | -6.62 | 8.66 |
| CDH6        | 1004   | NM_004932    | 1336 | 2.00  | 1.74  | 6.04  | -0.48 | 0.42  | 0.06  | 2.75  | 1.02  | 4.89  | 9.79  | 0.00  | 8.66 |
| SLC7A3      | 8486   | NM_0048464   | 1337 | 3.07  | 1.07  | 1.07  | -0.67 | -0.67 | -0.67 | 4.25  | 2.16  | 2.67  | 5.36  | -2.16 | 8.66 |
| LOC201164   | 201164 | NM_178836    | 1338 | 1.13  | 0.45  | 0.38  | -1.15 | -1.00 | -1.79 | 3.84  | 1.69  | 3.12  | 1.95  | -4.74 | 8.65 |
| CDORF136    | 140700 | NM_080621    | 1339 | 0.03  | -0.57 | -0.31 | -2.22 | -2.81 | -1.73 | 3.79  | 3.63  | 3.23  | -0.86 | -6.76 | 8.65 |
| ENP1        | 5117   | NM_0001274   | 1340 | 8.45  | 3.19  | 2.43  | -0.18 | -0.25 | -0.18 | 3.11  | 1.76  | 2.74  | 5.10  | -0.80 | 8.65 |
| CDORF118    | 168996 | NM_144980    | 1341 | 0.30  | 1.91  | 0.96  | -1.18 | -0.56 | -1.20 | 2.08  | 1.72  | 4.85  | 3.17  | -2.95 | 8.64 |
| ZNF288      | 26137  | NM_015642    | 1342 | 4.20  | 1.90  | 1.51  | -0.12 | 0.07  | -0.04 | 4.51  | 2.54  | 1.59  | 7.62  | -0.10 | 8.64 |
| MGC4766     | 83639  | NM_001300011 | 1343 | 0.63  | 1.33  | 0.32  | -1.16 | -1.21 | -1.39 | 2.85  | 3.95  | 1.84  | 2.28  | -4.56 | 8.64 |
| THM4K3      | 1043   | NM_006237    | 1344 | 0.02  | 0.27  | 0.98  | -0.02 | -0.27 | -0.87 | 6.00  | 1.90  | 1.27  | 4.17  | -5.74 | 8.64 |
| WTRN        | 136319 | NM_145808    | 1345 | 6.29  | 2.98  | 2.97  | 0.78  | 1.05  | 1.74  | 4.73  | 2.24  | 1.64  | 12.25 | 3.57  | 8.61 |
| MTP5        | 11093  | NM_052821    | 1346 | -0.80 | -0.23 | 0.18  | -2.48 | -2.10 | -2.12 | 1.52  | 2.43  | 4.66  | -0.86 | -3.70 | 8.61 |
| GT728       | 2869   | NM_005514    | 1347 | 0.62  | 0.62  | 0.62  | -1.66 | -1.66 | -1.66 | 3.91  | 4.66  | 1.30  | 1.30  | 1.02  | 8.60 |
| PE1A5       | 8682   | NM_003768    | 1348 | -0.49 | 1.65  | 1.12  | -1.05 | -1.34 | -0.72 | 0.21  | 4.96  | 3.40  | 2.28  | -1.12 | 8.57 |
| PTGER1      | 5731   | NM_000995    | 1349 | 3.18  | 1.15  | 1.27  | -1.27 | -0.84 | -0.49 | 5.65  | 3.74  | 1.18  | 5.60  | -2.60 | 8.57 |
| PHD3        | 6459   | NM_022193    | 1350 | -3.26 | -1.29 | 6.22  | -0.78 | -2.31 | -0.77 | 3.16  | 0.49  | 5.62  | 4.67  | -4.81 | 8.57 |
| RG1         | 23179  | NM_015149    | 1351 | 1.24  | 1.48  | 1.88  | -1.20 | -0.51 | -1.52 | 2.29  | 2.16  | 4.12  | 4.70  | -3.22 | 8.57 |
| AMFR        | 267    | NM_138958    | 1352 | 3.58  | 4.33  | 3.60  | 2.22  | 0.83  | 1.15  | 1.41  | 4.26  | 2.90  | 11.52 | 4.21  | 8.57 |
| BFP3        | 2754   | NM_015995    | 1353 | 0.16  | 0.72  | 0.61  | -1.80 | -1.72 | -1.89 | 1.59  | 3.31  | 3.66  | 1.48  | -5.21 | 8.57 |
| SGAV        | 365    | NM_000210    | 1354 | 2.38  | 2.87  | 2.76  | -0.23 | -0.23 | -0.23 | 3.43  | 2.38  | 1.72  | 7.02  | 1.83  | 8.56 |
| ME1         | 9638   | NM_005103    | 1355 | -0.14 | 0.85  | 0.68  | -1.64 | -1.28 | -1.26 | 1.65  | 4.16  | 2.75  | 1.38  | -1.17 | 8.56 |
| SCARF1      | 8578   | NM_145352    | 1356 | -0.45 | 0.84  | -0.60 | -2.02 | -1.60 | -1.43 | 2.01  | 4.58  | 1.97  | -0.20 | -5.05 | 8.56 |
| 285         | 285    | NM_000206    | 1357 | 2.21  | 2.72  | 1.76  | -0.62 | -1.15 | -0.62 | 2.52  | 3.62  | 3.03  | 5.70  | -2.56 | 8.56 |
| LOC284021   | 284021 | NM_001085423 | 1358 | 3.00  | 2.56  | 2.48  | -0.52 | 0.24  | -0.65 | 3.58  | 2.02  | 2.95  | 8.03  | -0.94 | 8.55 |
| PAQR9       | 344838 | NM_198504    | 1359 | 2.43  | 1.51  | 1.47  | -0.97 | -0.78 | -1.30 | 3.72  | 1.77  | 3.06  | 5.41  | -3.06 | 8.55 |
| PH2         | 11639  | NM_0001001   | 1360 | 2.37  | 1.65  | 2.66  | -0.40 | -0.40 | -0.40 | 2.54  | 2.67  | 3.76  | 6.68  | -1.11 | 8.54 |
| SFPAL1      | 6435   | NM_005411    | 1361 | 0.67  | 1.29  | 1.76  | -1.45 | -1.39 | -1.39 | 0.55  | 4.20  | 3.79  | 2.38  | -4.21 | 8.54 |
| SH3GL2      | 56904  | NM_020145    | 1362 | 0.67  | 0.57  | 2.61  | -0.13 | 1.53  | 0.81  | 1.46  | 3.67  | 2.40  | 3.85  | 2.21  | 8.54 |
| DNAA5       | 134233 | NM_00102189  | 1363 | 4.14  | 3.16  | 2.92  | 0.23  | 0.01  | 0.42  | 3.40  | 2.96  | 3.18  | 10.22 | 0.66  | 8.54 |
| VF44        | 2743   | NM_010245    | 1364 | 1.48  | 1.67  | 1.71  | -1.48 | -1.47 | -1.47 | 1.95  | 4.83  | 1.68  | 4.85  | 1.40  | 8.53 |
| THM14       | 131118 | NM_145261    | 1365 | 0.25  | 0.57  | 4.00  | -0.91 | -2.58 | -1.56 | 0.49  | 3.43  | 4.61  | 4.81  | -5.05 | 8.53 |
| HKR1        | 9641   | NM_014002    | 1366 | 0.67  | 0.88  | 1.08  | -1.12 | -0.73 | -0.48 | 3.04  | 4.12  | 1.37  | 2.63  | -2.33 | 8.53 |
| PHAL13      | 29124  | NM_000168    | 1367 | 1.74  | 1.46  | 2.46  | -0.22 | -0.22 | -0.22 | 2.19  | 2.12  | 2.12  | 5.44  | -0.57 | 8.53 |
| MGC16733    | 92105  | NM_033547    | 1368 | 0.98  | 0.88  | -0.33 | -1.87 | -1.81 | -1.64 | 3.07  | 3.72  | 1.72  | 1.53  | -5.32 | 8.52 |
| SPATA6      | 54568  | NM_          |      |       |       |       |       |       |       |       |       |       |       |       |      |

|           |           |              |       |       |       |       |       |       |       |      |      |      |       |       |      |
|-----------|-----------|--------------|-------|-------|-------|-------|-------|-------|-------|------|------|------|-------|-------|------|
| SUC39A1   | 27173     | NM_014437    | 1451  | 3.32  | 3.53  | 0.42  | -0.72 | -0.77 | -1.08 | 2.83 | 4.19 | 1.16 | 7.26  | -2.57 | 8.15 |
| 53313     | NM_024840 | 1452         | 2.03  | 2.76  | 3.87  | -0.20 | 0.89  | -0.20 | 1.14  | 2.24 | 2.78 | 4.70 | 8.66  | 0.55  | 8.07 |
| FAM25A    | 54801     | NM_017645    | 1453  | 1.51  | 2.47  | 1.57  | -0.48 | -0.67 | 0.50  | 3.90 | 3.33 | 0.96 | 5.55  | -0.24 | 8.15 |
| BIRC1     | 4671      | NM_004536    | 1454  | 6.08  | 4.64  | 5.56  | 0.58  | 0.38  | 0.64  | 3.38 | 2.15 | 2.65 | 16.28 | 1.60  | 8.18 |
| FRM23     | 973       | NM_033228    | 1455  | 9.79  | 31.20 | 12.78 | 4.96  | 3.16  | 1.42  | 1.00 | 4.57 | 2.61 | 53.77 | 9.54  | 8.18 |
| FLRH43    | 6597      | NM_019091    | 1456  | 3.91  | 2.01  | 1.56  | -0.50 | -0.90 | -0.90 | 2.13 | 3.99 | 0.80 | 6.30  | 1.89  | 8.18 |
| BAGE4     | 85317     | NM_181704    | 1457  | 3.91  | 6.54  | 5.14  | 1.36  | 0.98  | 0.24  | 1.18 | 3.16 | 3.84 | 15.58 | 2.58  | 8.18 |
| SPOEF     | 25803     | NM_012191    | 1458  | 2.74  | 2.24  | 2.21  | -1.09 | -0.74 | 0.84  | 2.99 | 2.25 | 2.93 | 7.18  | -2.67 | 8.17 |
| NHPS5E    | 5663      | NM_019892    | 1459  | 1.02  | 1.75  | 1.69  | -0.57 | -0.57 | -0.57 | 1.02 | 1.75 | 1.69 | 8.86  | 0.84  | 8.17 |
| FLJ32447  | 151278    | NM_153038    | 1460  | 1.75  | 1.80  | 0.92  | -0.69 | -0.77 | -0.77 | 3.31 | 3.17 | 1.69 | 4.48  | -2.36 | 8.17 |
| RTD1      | 27156     | NM_014433    | 1461  | -0.92 | -1.20 | -0.26 | -2.26 | -2.55 | -2.35 | 1.81 | 1.77 | 4.59 | -2.38 | -7.16 | 8.17 |
| 55570     | NM_024623 | 1462         | 1.31  | 1.52  | 1.66  | -0.40 | -0.55 | -0.55 | -0.55 | 1.31 | 1.52 | 1.66 | 4.80  | 1.19  | 8.16 |
| ZNF579    | 163033    | NM_152600    | 1463  | 1.40  | 1.84  | 1.79  | 0.97  | 0.75  | 0.03  | 1.08 | 3.02 | 4.06 | 5.02  | 1.75  | 8.16 |
| NUFV3     | 4731      | NM_00101503  | 1464  | 1.02  | 4.20  | 5.67  | -0.06 | 0.14  | 0.31  | 0.85 | 2.62 | 4.69 | 10.90 | 0.39  | 8.16 |
| SPAG5     | 10615     | NM_006461    | 1465  | 0.30  | 0.60  | 2.10  | -0.80 | -0.24 | -0.94 | 2.72 | 2.26 | 3.16 | 3.00  | -1.39 | 8.14 |
| 44069F4   | 54931     | NM_017815    | 1466  | 1.18  | 1.09  | 2.17  | -0.59 | -0.58 | -1.14 | 1.98 | 2.36 | 3.80 | 4.44  | -2.31 | 8.14 |
| G10T-1    | 92283     | NM_153257    | 1467  | 4.03  | 3.31  | 3.39  | -0.09 | -0.59 | -0.59 | 2.63 | 3.07 | 2.43 | 10.73 | -0.90 | 8.14 |
| RECK      | 8434      | NM_021111    | 1468  | 0.57  | 0.30  | 1.34  | -1.15 | -0.85 | -1.54 | 2.86 | 1.23 | 4.05 | 2.21  | -3.53 | 8.14 |
| CFOR24    | 79017     | NM_020491    | 1469  | 1.87  | 2.60  | 2.17  | -0.11 | -0.42 | 0.01  | 1.41 | 3.99 | 2.73 | 7.65  | 0.52  | 8.13 |
| GCKR      | 2646      | NM_001486    | 1470  | 7.05  | 4.21  | 2.81  | 0.00  | 0.03  | 0.32  | 4.92 | 1.80 | 1.41 | 14.08 | 0.34  | 8.13 |
| LOC645922 | 645922    | NM_001045479 | 1471  | 0.49  | 1.09  | 0.73  | -1.86 | -1.42 | -1.24 | 2.65 | 4.33 | 1.14 | 2.30  | -4.51 | 8.12 |
| GALT      | 2592      | NM_000058    | 1472  | -1.05 | -1.12 | -0.50 | -2.29 | -1.65 | -2.05 | 1.08 | 0.76 | 6.28 | -2.67 | -5.98 | 8.12 |
| CHRNA2    | 1135      | NM_000742    | 1473  | 2.68  | 1.70  | 1.63  | 0.76  | 1.39  | 0.78  | 3.55 | 2.32 | 2.25 | 6.01  | 2.93  | 8.12 |
| SCNN1A    | 6337      | NM_001038    | 1474  | 2.09  | 0.22  | 0.96  | -1.20 | -0.36 | -1.36 | 3.50 | 1.27 | 3.34 | 3.27  | -2.92 | 8.11 |
| LM24      | 8543      | NM_006769    | 1475  | 4.76  | 2.96  | 4.62  | 0.51  | 0.45  | 0.79  | 2.40 | 3.00 | 2.70 | 12.34 | 1.74  | 8.10 |
| PSMB2     | 5090      | NM_002794    | 1476  | -0.69 | -0.45 | -1.02 | -2.06 | -2.67 | -2.32 | 4.42 | 2.56 | 1.12 | -2.16 | -7.05 | 8.10 |
| TNP1      | 10412     | NM_014886    | 1477  | 0.70  | -1.53 | -1.37 | -2.46 | -2.77 | -2.96 | 6.68 | 0.42 | 1.00 | -2.20 | -8.19 | 8.09 |
| PDP2IP2   | 26073     | NM_015584    | 1478  | 1.72  | 3.60  | 1.97  | 0.08  | -0.61 | 0.22  | 0.76 | 5.56 | 1.76 | 7.29  | -0.31 | 8.09 |
| 5512      | NM_015584 | 1479         | 0.44  | 0.17  | 1.23  | -0.44 | -0.17 | -0.29 | -0.39 | 3.21 | 2.19 | 3.00 | 0.94  | 6.30  | 8.09 |
| ACPP      | 55        | NM_001099    | 1480  | 2.23  | 2.89  | 0.28  | -0.63 | -1.12 | -1.12 | 0.73 | 6.43 | 0.92 | 3.40  | -2.87 | 8.09 |
| PSG6      | 5675      | NM_002782    | 1481  | 1.62  | 0.78  | 1.01  | -1.26 | -0.76 | -0.68 | 4.13 | 1.70 | 2.26 | 3.40  | -2.70 | 8.09 |
| LOC23431  | 23431     | NM_001842    | 1482  | 1.62  | 0.45  | 0.89  | -0.27 | -0.40 | -0.55 | 2.42 | 1.67 | 1.54 | -2.41 | -2.41 | 8.09 |
| BN2       | 51411     | NM_016293    | 1483  | 6.56  | 1.71  | 1.32  | 1.12  | 0.06  | 0.19  | 4.50 | 2.67 | 0.91 | 10.59 | 1.37  | 8.09 |
| HVEP1     | 3096      | NM_002114    | 1484  | 2.62  | 0.88  | 1.08  | -1.39 | -1.02 | -1.51 | 3.68 | 1.35 | 3.06 | 4.58  | -3.92 | 8.08 |
| WBP11     | 51729     | NM_016312    | 1485  | 1.52  | 0.30  | 0.37  | -1.42 | -1.98 | -2.10 | 3.94 | 2.28 | 1.86 | 1.45  | -5.50 | 8.08 |
| 1102      | NM_006564 | 1486         | 1.55  | 0.44  | 1.52  | -0.44 | -0.55 | -0.83 | -0.47 | 5.15 | 0.83 | 4.50 | 3.50  | -1.57 | 8.08 |
| TSN       | 7247      | NM_004622    | 1487  | 1.61  | 1.68  | 2.97  | -0.67 | -1.01 | -0.94 | 2.45 | 1.93 | 3.69 | 6.26  | -2.63 | 8.07 |
| MAR4      | 57574     | NM_020814    | 1488  | -0.29 | 0.18  | -0.48 | -2.46 | -1.91 | -2.50 | 3.50 | 2.10 | 2.47 | -0.59 | -8.67 | 8.07 |
| 1028      | NM_005001 | 1489         | 1.66  | 1.81  | 2.84  | -0.66 | -1.14 | -1.66 | -1.66 | 1.74 | 2.66 | 1.54 | 4.61  | 1.96  | 8.07 |
| MI-E1     | 57708     | NM_020948    | 1490  | 4.83  | 3.62  | 1.68  | 0.68  | 0.45  | 0.43  | 4.59 | 1.99 | 1.49 | 10.13 | 1.56  | 8.07 |
| KN        | 22944     | NM_012131    | 1491  | 0.19  | 0.84  | 1.50  | -1.07 | -1.67 | -1.70 | 1.31 | 3.28 | 3.48 | 2.53  | -3.43 | 8.07 |
| 144       | NM_001657 | 1492         | -0.79 | 0.05  | 1.70  | -1.44 | -1.56 | -0.99 | -1.29 | 2.64 | 3.84 | 2.40 | 3.52  | -2.24 | 8.07 |
| RBP2      | 5948      | NM_004164    | 1493  | 1.72  | 1.83  | 0.87  | -0.84 | -0.95 | -0.62 | 4.18 | 3.13 | 0.75 | 6.41  | -2.42 | 8.07 |
| IL13A     | 51561     | NM_016584    | 1494  | 1.26  | 1.73  | 1.39  | -0.95 | -1.23 | -0.89 | 2.99 | 2.22 | 2.85 | 4.37  | -3.07 | 8.06 |
| MUP2      | 4133      | NM_013145    | 1495  | -0.68 | 0.27  | -0.51 | -1.72 | -1.99 | -1.92 | 0.96 | 4.51 | 2.59 | -0.91 | -5.64 | 8.06 |
| 2625      | NM_012823 | 1496         | 0.56  | 0.27  | 1.37  | -0.42 | -0.16 | -0.26 | -0.34 | 1.46 | 2.96 | 3.74 | 0.38  | 3.97  | 8.06 |
| 10425     | NM_153206 | 1497         | -2.19 | 2.49  | 1.33  | -0.78 | -0.97 | -0.96 | -1.18 | 3.32 | 2.55 | 6.01 | -1.68 | 8.04  |      |
| JTAF      | 9516      | NM_004462    | 1498  | 1.50  | 3.97  | 0.69  | 1.56  | 0.39  | 0.94  | 1.95 | 3.90 | 2.19 | 6.15  | 2.90  | 8.04 |
| 10546     | NM_004263 | 1499         | 0.06  | 0.11  | 1.02  | -0.06 | -0.11 | -0.11 | -0.11 | 1.02 | 1.02 | 1.02 | 2.57  | 1.52  | 8.04 |
| FMNL1     | 752       | NM_005892    | 1500  | 2.21  | 1.17  | 3.31  | -0.53 | -0.94 | -1.13 | 2.04 | 1.08 | 4.91 | 6.69  | -2.59 | 8.03 |
| TEK21     | 113419    | NM_144582    | 1501  | 3.89  | 3.03  | 2.66  | 1.19  | 0.13  | 0.12  | 2.10 | 3.14 | 2.79 | 9.58  | 1.44  | 8.03 |
| FLJ20411  | 5489      | NM_001813    | 1502  | 1.78  | 0.37  | 0.37  | -1.34 | -0.34 | -0.34 | 2.40 | 3.84 | 2.40 | 3.52  | -2.24 | 8.03 |
| ASGR1     | 432       | NM_010671    | 1503  | 0.38  | -0.90 | 0.69  | -0.88 | -0.79 | -1.43 | 1.47 | 0.15 | 6.70 | -0.60 | 7.10  | 8.03 |
| COMM2D    | 51122     | NM_016094    | 1504  | 4.43  | 0.79  | 0.22  | -1.33 | -1.65 | -1.51 | 2.42 | 2.79 | 2.80 | 1.44  | -4.49 | 8.01 |
| PI44      | 10561     | NM_006417    | 1505  | 4.50  | 3.41  | 3.04  | -0.39 | 0.01  | -1.02 | 2.65 | 1.78 | 2.57 | 10.96 | -1.40 | 8.01 |
| NHAGEC2   | 51418     | NM_016249    | 1506  | 0.85  | 1.03  | 1.03  | -0.21 | -0.19 | -0.21 | 3.21 | 2.22 | 2.73 | 2.73  | 3.98  | 8.00 |
| RPA1      | 26015     | NM_015540    | 1507  | 1.54  | 1.32  | 0.87  | -1.31 | -0.84 | -1.32 | 3.43 | 2.31 | 3.27 | 3.73  | -3.47 | 8.00 |
| CPY21     | 199974    | NM_178134    | 1508  | 3.60  | 2.26  | 2.94  | -0.75 | -0.71 | -0.29 | 3.42 | 1.36 | 2.22 | 8.79  | -1.74 | 8.00 |
| FBX5      | 2627      | NM_001727    | 1509  | 0.29  | 0.11  | 0.50  | -0.29 | -0.19 | -0.29 | 3.28 | 0.95 | 1.78 | 0.83  | 0.75  | 7.99 |
| ITGA1     | 3672      | NM_181501    | 1510  | 2.23  | 2.14  | 3.37  | -0.19 | 0.15  | -0.01 | 2.04 | 2.18 | 3.76 | 7.74  | -0.05 | 7.98 |
| ZNF46     | 7597      | NM_006977    | 1511  | -0.10 | 0.81  | 0.40  | -1.23 | -1.27 | -1.31 | 1.76 | 3.80 | 2.41 | 1.11  | -3.81 | 7.98 |
| 64976     | NM_021749 | 1512         | 0.00  | 0.67  | 0.00  | -1.40 | -1.55 | -1.40 | -1.55 | 2.86 | 2.86 | 2.86 | 0.67  | -4.35 | 7.97 |
| CRBP      | 1153      | NM_001280    | 1513  | 1.50  | 1.54  | 1.72  | 0.55  | 0.17  | -0.30 | 1.50 | 2.52 | 3.95 | 5.77  | 0.42  | 7.96 |
| KIAA027   | 9811      | NM_014772    | 1514  | 0.77  | 0.69  | 0.84  | -1.32 | -1.03 | -1.46 | 3.19 | 2.10 | 2.67 | 2.30  | -3.80 | 7.96 |
| TOR1B     | 27348     | NM_014506    | 1515  | 1.72  | 1.14  | 2.08  | -0.68 | -1.13 | -1.26 | 1.26 | 2.92 | 3.78 | 4.95  | -3.07 | 7.96 |
| GRHL1     | 54584     | NM_001204    | 1516  | -0.31 | 0.66  | 1.39  | -0.31 | -0.31 | -0.31 | 3.43 | 3.43 | 3.43 | 3.43  | 1.55  | 7.96 |
| MLT1      | 4298      | NM_005934    | 1517  | -0.02 | -0.23 | -0.29 | -2.30 | -2.21 | -2.18 | 2.49 | 1.91 | 3.56 | -0.55 | -6.69 | 7.95 |
| ZNF323    | 64288     | NM_030899    | 1518  | 2.16  | 3.00  | 2.68  | 0.24  | -0.24 | -0.51 | 2.07 | 2.84 | 3.04 | 7.84  | -0.51 | 7.95 |
| 37467     | NM_019820 | 1519         | 3.21  | 1.23  | 1.23  | -0.21 | -0.21 | -0.21 | -0.21 | 3.21 | 1.23 | 1.23 | 2.47  | 1.09  | 7.95 |
| CI2ORF8   | 10961     | NM_001034025 | 1520  | 2.03  | 2.76  | 2.23  | -0.86 | -0.80 | -1.03 | 2.30 | 2.65 | 3.00 | 7.03  | -2.69 | 7.94 |
| OR10C1    | 442194    | NM_013941    | 1521  | 2.34  | 2.23  | 2.14  | -0.78 | -0.83 | -0.65 | 2.74 | 2.43 | 2.77 | 6.71  | -2.25 | 7.94 |
| 1011      | NM_001802 | 1522         | 2.65  | 2.16  | 1.78  | -0.40 | -0.80 | -0.54 | -0.54 | 2.65 | 2.16 | 1.78 | 6.59  | -2.67 | 7.93 |
| CLIC2     | 51246     | NM_016509    | 1523  | 3.31  | 3.31  | 3.79  | -1.11 | 0.09  | 0.25  | 2.57 | 2.17 | 3.21 | 10.05 | -0.27 | 7.93 |
| PLAC1     | 10761     | NM_021796    | 1524  | 5.20  | 5.29  | 2.64  | 0.21  | 0.36  | -0.36 | 3.90 | 3.22 | 2.40 | 13.13 | -0.21 | 7.93 |
| HOCX3     | 3223      | NM_004503    | 1525  | -0.19 | 0.23  | -0.53 | -2.01 | -1.66 | -1.48 | 2.31 | 2.51 | 1.49 | -0.49 | -0.15 | 7.91 |
| 902       | NM_023215 | 1526         | 1.32  | 1.66  | 1.66  | -1.08 | -1.08 | -1.08 | -1.08 | 2.62 | 2.62 | 3.55 | 3.55  | 0.48  | 7.91 |
| OPN1MW2   | 728458    | NM_001048181 | 1527  | -0.42 | 0.58  | 0.62  | -1.15 | -1.48 | -1.14 | 2.07 | 2.97 | 2.86 | 0.78  | -3.78 | 7.90 |
| TUBB1     | 7277      | NM_006000    | 1528  | 3.30  | 2.78  | 1.64  | -0.43 | -1.09 | 1.10  | 2.77 | 4.16 | 0.97 | 7.73  | -1.42 | 7.90 |
| PIGH      | 5239      | NM_005669    | 1529  | 0.53  | 0.85  | 1.66  | -0.62 | -0.82 | -0.82 | 1.66 | 2.17 | 3.76 | 3.51  | 1.97  | 7.89 |
| FLJ0436   | 54934     | NM_017822    | 1530  | -0.92 | -0.60 | 0.76  | -1.33 | -1.84 | -1.76 | 0.18 | 2.56 | 5.16 | 0.76  | -4.93 | 7.89 |
| UNC1912   | 345757    | NM_198907    | 1531  | 1.68  | 3.04  | 1.68  | -1.28 | -0.9  |       |      |      |      |       |       |      |

|             |        |              |      |       |       |       |       |       |       |       |      |       |       |         |      |
|-------------|--------|--------------|------|-------|-------|-------|-------|-------|-------|-------|------|-------|-------|---------|------|
| AD-017      | 55830  | NM_152932    | 1613 | 1.62  | 0.41  | 0.12  | -0.75 | -1.25 | -1.45 | 1.72  | 1.71 | 4.16  | 2.14  | -3.44   | 7.59 |
| AKRS2       | 1032   | NM_00102806  | 1614 | 2.05  | 0.29  | 0.79  | -0.71 | -0.31 | -0.49 | 5.55  | 1.37 | 0.73  | 2.13  | -3.28   | 7.59 |
| DKFZ5604616 | 81556  | NM_001138043 | 1615 | 1.23  | 1.63  | 2.49  | -1.40 | -0.99 | -1.15 | 1.96  | 2.25 | 3.88  | 5.35  | -3.54   | 7.59 |
| LOC149018   | 149018 | NM_001010857 | 1616 | 0.70  | -1.41 | 0.62  | -2.00 | -1.84 | -1.25 | 5.70  | 0.25 | 1.64  | -0.08 | -5.09   | 7.59 |
| ORNA        | 28958  | NM_001062241 | 1617 | 1.78  | 1.19  | -0.42 | -1.19 | -1.39 | -1.09 | 2.92  | 3.61 | 1.04  | 1.56  | -3.67   | 7.58 |
| FOCS1       | 232    | NM_013804    | 1618 | 6.37  | 1.02  | 0.62  | -0.60 | -0.41 | -0.60 | 2.41  | 3.40 | 1.72  | 1.90  | 10.99   | 7.58 |
| LOC161931   | 161931 | NM_139174    | 1619 | 0.70  | 1.30  | 0.83  | -0.82 | -1.06 | -0.69 | 2.49  | 1.18 | 1.90  | 3.83  | -2.57   | 7.58 |
| DM2         | 1601   | NM_001143    | 1620 | 0.80  | 3.88  | 1.70  | -0.94 | -0.36 | -0.22 | 1.26  | 4.41 | 1.91  | 4.78  | -1.52   | 7.58 |
| PM2         | 23360  | NM_00105117  | 1621 | 0.98  | 1.54  | 0.67  | -0.82 | -1.01 | -0.77 | 3.82  | 1.05 | 1.77  | 1.81  | 3.99    | 7.57 |
| NFR5F1B     | 7113   | NM_0010566   | 1622 | 0.20  | 1.90  | 1.16  | -0.92 | -0.71 | -0.90 | 1.09  | 3.03 | 3.45  | 3.27  | -2.53   | 7.57 |
| LOC374768   | 374768 | NM_199339    | 1623 | 0.89  | 0.59  | 1.42  | -0.90 | -1.45 | -1.16 | 2.04  | 2.03 | 3.49  | 2.90  | -3.51   | 7.57 |
| COV1        | 3001   | NM_00103793  | 1624 | 2.25  | 2.23  | 2.33  | -1.50 | -0.68 | -1.31 | 0.12  | 3.83 | 3.63  | 3.80  | 10.60   | 7.56 |
| FNAG        | 3443   | NM_021000    | 1625 | 1.05  | 2.15  | 2.04  | -0.50 | -0.54 | -0.41 | 4.02  | 1.96 | 1.58  | 8.39  | -1.45   | 7.56 |
| UPG         | 9388   | NM_060033    | 1626 | 1.90  | 0.64  | 0.93  | -1.39 | -1.17 | -1.38 | 3.65  | 1.27 | 2.64  | 3.46  | -3.94   | 7.56 |
| LOC512944   | 512944 | NM_016474    | 1627 | 0.70  | 0.47  | 0.99  | -1.03 | -1.74 | -1.25 | 1.54  | 3.57 | 2.45  | 2.16  | -4.01   | 7.56 |
| PA08        | 7989   | NM_013592    | 1628 | 2.44  | 2.26  | 3.26  | 0.75  | 1.44  | 0.31  | 1.73  | 3.11 | 2.72  | 7.97  | 2.37    | 7.55 |
| ABLUM1      | 3983   | NM_006720    | 1629 | 0.78  | 5.87  | 5.26  | 0.50  | 1.38  | -0.20 | -0.26 | 3.53 | 4.28  | 11.91 | 1.69    | 7.55 |
| ST13        | 6767   | NM_003932    | 1630 | 2.21  | 2.17  | 0.98  | -0.60 | -0.02 | -0.64 | 3.64  | 2.14 | 1.76  | 5.36  | -1.25   | 7.55 |
| H0K310      | 2236   | NM_002148    | 1631 | -0.15 | 1.81  | 0.90  | -1.72 | -1.22 | -1.50 | 1.33  | 3.57 | 2.64  | 2.56  | 4.44    | 7.55 |
| NFS1        | 9054   | NM_181679    | 1632 | 0.01  | 0.15  | 0.27  | -2.44 | 0.17  | -1.69 | 2.81  | 1.22 | 3.51  | 0.42  | -3.96   | 7.55 |
| NMRG2       | 79664  | NM_001018089 | 1633 | 3.56  | 1.72  | 1.26  | -1.23 | 0.63  | -1.19 | 4.92  | 0.74 | 1.89  | 6.54  | -1.79   | 7.54 |
| SLSA10      | 125206 | NM_001042450 | 1634 | -0.62 | -0.09 | -0.68 | -1.84 | -1.73 | -1.87 | 2.66  | 2.88 | 2.49  | -1.38 | -5.54   | 7.53 |
| EIFS42      | 86648  | NM_020390    | 1635 | 1.52  | -0.68 | 4.39  | -2.52 | -1.71 | -1.65 | 0.54  | 1.77 | 5.22  | 2.19  | -5.89   | 7.53 |
| HPCAL1      | 3241   | NM_002149    | 1636 | -0.68 | -0.98 | -0.05 | -1.89 | -2.39 | -2.08 | 1.50  | 1.74 | 4.29  | -1.71 | -6.35   | 7.53 |
| IGP8A       | 3487   | NM_001552    | 1637 | 1.50  | 0.91  | 0.76  | -1.49 | -1.01 | -1.09 | 4.53  | 1.50 | 1.50  | 3.17  | -1.54   | 7.53 |
| KM1533      | 57655  | NM_00136399  | 1638 | 1.87  | 2.94  | 1.42  | -0.59 | -0.14 | 0.11  | 2.57  | 4.32 | 0.64  | 6.23  | -0.62   | 7.53 |
| PLXNC1      | 10154  | NM_005761    | 1639 | 2.79  | 1.68  | 1.70  | -0.78 | -0.04 | -0.22 | 4.82  | 1.42 | 1.28  | 6.17  | -1.04   | 7.53 |
| FGD5        | 152373 | NM_152336    | 1640 | 4.08  | 2.25  | 1.56  | 0.42  | -0.39 | 0.03  | 4.64  | 1.58 | 1.30  | 8.49  | 0.06    | 7.52 |
| PHL1        | 4987   | NM_000913    | 1641 | 1.40  | 1.29  | 1.56  | -0.84 | -0.99 | -1.04 | 1.50  | 1.50 | 1.50  | 8.25  | 0.94    | 7.52 |
| DDX5        | 1655   | NM_004396    | 1642 | 2.06  | 0.06  | 0.33  | -1.74 | -1.64 | -1.51 | 2.50  | 1.57 | 3.44  | 0.59  | -4.89   | 7.52 |
| FLJ38753    | 127707 | NM_152375    | 1643 | 1.77  | 2.59  | 3.28  | 0.50  | -0.08 | 0.10  | 1.93  | 2.37 | 3.21  | 7.64  | 0.52    | 7.51 |
| CG98107     | 5489   | NM_012454    | 1644 | 1.19  | 0.75  | 0.77  | -0.85 | -0.89 | -0.89 | 3.62  | 1.67 | 2.55  | 3.91  | -2.55   | 7.51 |
| MGC23401    | 196441 | NM_144682    | 1645 | 0.33  | 1.70  | 0.55  | -1.52 | -0.79 | -1.04 | 1.96  | 3.57 | 1.99  | 2.37  | -3.36   | 7.51 |
| PCB9A       | 57060  | NM_003310    | 1646 | 4.24  | 2.23  | 2.83  | 0.51  | 1.32  | -0.03 | 3.60  | 5.00 | 3.40  | 9.31  | 1.81    | 7.50 |
| TB2         | 26608  | NM_012453    | 1647 | 3.30  | 4.47  | 3.54  | -0.88 | -0.53 | 0.80  | 0.76  | 1.13 | 11.50 | 11.50 | 1.14    | 7.50 |
| ZNF134      | 7093   | NM_003435    | 1648 | 1.32  | 2.39  | 2.06  | -0.59 | -0.10 | -0.10 | 3.15  | 2.08 | 2.10  | 5.78  | 1.43    | 7.50 |
| MGC4189     | 84268  | NM_002308    | 1649 | 3.09  | 1.47  | 3.51  | -0.20 | -0.26 | -0.72 | 1.80  | 1.38 | 4.31  | 8.07  | -1.17   | 7.49 |
| PRAMEF9     | 943970 | NM_001010890 | 1650 | 0.44  | 1.47  | 0.79  | -1.47 | -1.38 | -1.13 | 1.63  | 2.92 | 2.94  | 2.71  | -3.98   | 7.49 |
| PM3D2       | 5547   | NM_001671    | 1651 | 1.68  | 1.68  | 1.68  | -0.03 | -0.03 | -0.03 | 1.59  | 3.05 | 3.05  | 5.85  | 2.85    | 7.49 |
| CPS1        | 29894  | NM_013291    | 1652 | 1.46  | -0.84 | -0.98 | -1.13 | -2.78 | -1.73 | 5.39  | 0.74 | 1.35  | -0.37 | -5.63   | 7.47 |
| LOC39105    | 339105 | NM_001039503 | 1653 | 2.15  | 2.13  | 2.62  | -0.03 | -0.74 | -0.34 | 2.14  | 3.00 | 2.33  | 6.90  | -1.05   | 7.47 |
| ICP2        | 4329   | NM_00102450  | 1654 | 1.80  | 2.24  | 1.80  | -0.75 | -0.89 | -0.75 | 2.19  | 2.75 | 2.19  | 4.04  | -2.58   | 7.47 |
| LOC242P2    | 10435  | NM_000779    | 1655 | 1.27  | 2.29  | 1.18  | -0.71 | -0.74 | -1.11 | 2.19  | 2.70 | 2.68  | 4.73  | -2.55   | 7.47 |
| CACNA1H     | 8912   | NM_001005407 | 1656 | -0.47 | 2.25  | -0.38 | -2.03 | -0.81 | -1.28 | 3.28  | 3.03 | 1.15  | 1.39  | -4.13   | 7.47 |
| UFM1        | 51569  | NM_016157    | 1657 | 1.55  | 3.10  | 2.07  | 0.16  | -1.19 | -0.12 | 1.39  | 4.03 | 2.04  | 6.72  | -1.15   | 7.46 |
| ABL1        | 32     | NM_001517    | 1658 | 1.51  | 2.11  | 1.36  | -0.51 | -0.44 | -0.44 | 1.59  | 2.92 | 1.68  | 4.97  | 0.84    | 7.46 |
| RUNX2       | 860    | NM_001010561 | 1659 | 6.34  | 4.14  | 2.76  | 2.44  | 0.93  | 1.75  | 3.72  | 2.79 | 0.94  | 13.24 | 5.11    | 7.46 |
| TPBG        | 7162   | NM_006700    | 1660 | 1.35  | 0.62  | 0.58  | -1.07 | -1.04 | -1.38 | 3.42  | 2.00 | 2.04  | 2.55  | -3.49   | 7.46 |
| ZNF329      | 12075  | NM_001004684 | 1661 | 0.89  | 0.52  | 0.89  | -0.89 | -0.52 | -0.52 | 2.77  | 2.05 | 2.63  | 2.55  | 2.54    | 7.46 |
| HIP1        | 3892   | NM_005338    | 1662 | 2.68  | 2.54  | 0.93  | -0.41 | -0.28 | -0.61 | 3.61  | 2.11 | 1.73  | 6.14  | -1.31   | 7.45 |
| SPH2        | 56848  | NM_002126    | 1663 | 0.69  | 4.93  | 3.86  | -0.41 | 0.19  | 0.50  | 0.88  | 5.06 | 1.50  | 9.47  | 0.28    | 7.45 |
| IKZF1       | 8318   | NM_0010501   | 1664 | 0.79  | 0.63  | 0.61  | -1.52 | -1.48 | -1.48 | 3.16  | 2.69 | 3.16  | 4.87  | -2.73   | 7.45 |
| APGA4       | 115201 | NM_178270    | 1665 | 1.62  | 1.91  | 0.90  | 0.03  | -1.03 | -0.80 | 1.82  | 3.57 | 2.05  | 4.42  | -1.87   | 7.44 |
| C10R36      | 343035 | NM_183059    | 1666 | 0.93  | 4.97  | 1.81  | 0.81  | -1.20 | -0.30 | 0.16  | 6.88 | 0.40  | 7.70  | -0.09   | 7.44 |
| GSG2        | 83903  | NM_031965    | 1667 | 4.04  | 3.01  | 1.71  | -0.05 | -0.12 | -0.09 | 2.85  | 2.86 | 1.73  | 8.77  | -2.27   | 7.44 |
| MGC16664    | 14873  | NM_175299    | 1668 | 0.88  | 2.74  | 3.32  | 0.69  | 0.39  | 0.20  | 2.69  | 3.02 | 1.50  | 10.94 | 2.97    | 7.44 |
| KCNB        | 8514   | NM_172130    | 1669 | 3.77  | 2.78  | 1.96  | -0.41 | 0.20  | -0.62 | 3.32  | 1.84 | 2.28  | 8.51  | -0.83   | 7.44 |
| LOC17       | 3605   | NM_002190    | 1670 | 0.78  | 3.56  | 1.72  | 0.42  | -0.31 | -0.54 | 1.11  | 4.60 | 1.72  | 6.07  | -0.43   | 7.43 |
| IKF2        | 435    | NM_001897    | 1671 | 0.21  | 1.73  | 1.73  | -1.17 | -1.53 | -1.53 | 1.62  | 1.73 | 2.68  | 1.66  | -4.25   | 7.43 |
| PRPF3       | 9129   | NM_004098    | 1672 | 1.93  | 0.25  | -0.41 | -1.34 | -1.86 | -1.56 | 3.78  | 1.84 | 1.80  | 1.27  | -4.75   | 7.43 |
| DEG5        | 8560   | NM_144780    | 1673 | 1.61  | 1.64  | 0.87  | -0.95 | -1.04 | -0.85 | 2.64  | 2.99 | 1.79  | 4.12  | -2.83   | 7.42 |
| LOC728137   | 728137 | NM_001037897 | 1674 | 1.41  | 0.60  | 2.45  | -1.41 | -0.60 | -0.60 | 2.26  | 1.41 | 3.74  | 1.15  | -4.74   | 7.42 |
| CLDN12      | 8960   | NM_012129    | 1675 | 2.93  | 3.85  | 2.66  | -0.38 | -0.35 | -0.14 | 2.76  | 3.00 | 1.63  | 9.44  | -0.87   | 7.42 |
| FLJ25590    | 28316  | NM_175895    | 1676 | 1.57  | 1.50  | -0.46 | -0.87 | -1.20 | -1.17 | 4.32  | 2.20 | 0.89  | 2.61  | -3.24   | 7.41 |
| HQD1        | 3048   | NM_005331    | 1677 | 8.56  | 4.81  | 2.56  | 1.48  | -0.58 | -0.62 | 2.52  | 0.59 | 4.31  | 15.99 | 0.28    | 7.41 |
| NKX2-2      | 2318   | NM_004026    | 1678 | 1.86  | 1.31  | 1.21  | -0.56 | -0.56 | -0.56 | 3.55  | 3.51 | 2.42  | 4.39  | 0.89    | 7.41 |
| PBX10       | 5192   | NM_002617    | 1679 | 18.83 | 14.71 | 10.73 | 3.50  | 1.40  | 1.32  | 3.02  | 1.91 | 1.48  | 44.28 | 6.21    | 7.41 |
| HQD12       | 55906  | NM_018884    | 1680 | 2.05  | 1.18  | 1.23  | -1.16 | -0.87 | -0.83 | 2.64  | 1.95 | 2.81  | 4.46  | -1.96   | 7.40 |
| LOC22624    | 7986   | NM_00103808  | 1681 | 1.88  | 1.61  | 1.68  | -0.89 | -0.89 | -0.89 | 1.88  | 1.88 | 1.88  | 12.18 | 0.16    | 7.40 |
| CZORF27     | 29798  | NM_013310    | 1682 | 1.16  | 1.67  | 1.30  | -1.03 | -0.41 | -0.57 | 1.88  | 2.89 | 2.62  | 4.13  | -2.01   | 7.40 |
| LOC90353    | 90353  | NM_145232    | 1683 | -1.16 | 0.38  | 0.25  | -1.42 | -1.30 | -1.44 | 1.43  | 2.03 | 3.94  | 0.46  | -4.16   | 7.39 |
| HPCP65      | 2907   | NM_001457    | 1684 | 1.87  | 1.48  | 3.08  | -0.68 | -0.68 | -0.68 | 1.87  | 1.48 | 3.08  | 6.88  | -0.59   | 7.39 |
| CENPC1      | 1090   | NM_001812    | 1685 | -0.36 | 1.28  | 1.19  | -1.05 | -0.91 | -1.33 | 0.33  | 4.81 | 2.91  | 2.11  | -3.30   | 7.39 |
| USP50       | 373509 | NM_003440    | 1686 | 1.03  | 3.14  | 1.60  | 0.55  | -0.09 | -0.85 | 0.70  | 4.18 | 2.51  | 7.27  | -0.21   | 7.39 |
| EDG1        | 3501   | NM_002049    | 1687 | 0.84  | 1.87  | 1.57  | -0.95 | -0.73 | -0.46 | 2.25  | 2.76 | 2.37  | 4.27  | -1.14   | 7.38 |
| COR6A6      | 55848  | NM_018465    | 1688 | 2.55  | 1.13  | 0.98  | -0.55 | -0.55 | -0.55 | 3.16  | 2.55 | 2.67  | 7.67  | 0.99    | 7.37 |
| LOC120237   | 120237 | NM_00102865  | 1689 | 2.59  | 0.86  | 1.26  | -1.10 | -1.36 | -1.11 | 2.96  | 2.70 | 1.71  | 4.70  | -3.57   | 7.37 |
| KM1A1787    | 84461  | NM_001005408 | 1690 | 0.75  | 1.39  | 2.92  | -0.13 | -0.47 | -1.59 | 0.44  | 0.85 | 0.68  | 5.06  | -1.29   | 7.37 |
| FG2         | 2247   | NM_002026    | 1691 | 0.68  | 1.24  | 1.24  | -0.14 | -0.14 | -0.14 | 2.17  | 1.87 | 1.64  | 3.89  | 0.64    | 7.37 |
| LOC65432    | 65432  | NM_00180223  | 1692 | 1.57  | 2.22  | 0.62  | -1.09 | -0.85 | -0.42 | 3.67  | 2.66 | 1.03  | 4.41  | -2.36</ |      |

|             |           |              |      |       |       |       |       |       |       |      |      |      |       |       |      |
|-------------|-----------|--------------|------|-------|-------|-------|-------|-------|-------|------|------|------|-------|-------|------|
| F672        | 2852      | NM_002009    | 1775 | 3.50  | 2.53  | 1.90  | -0.81 | -0.03 | -0.68 | 4.12 | 1.43 | 1.52 | 7.99  | -1.52 | 7.07 |
| F672        | 6814      | NM_002030    | 1776 | 1.22  | 1.45  | 0.87  | -0.90 | -0.66 | -0.49 | 3.05 | 2.39 | 1.63 | 3.57  | -1.94 | 7.65 |
| ZDHC8       | 29001     | NM_013373    | 1777 | 0.71  | 2.34  | 0.45  | -0.95 | -0.91 | -0.49 | 1.86 | 3.81 | 1.89 | 3.49  | -2.35 | 7.06 |
| C190R25     | 148223    | NM_152482    | 1778 | 0.41  | 0.08  | -0.19 | -1.20 | -1.57 | -1.74 | 2.42 | 2.98 | 1.66 | 0.30  | -4.51 | 7.06 |
| VF528       | 51510     | NM_016208    | 1779 | 4.20  | 3.93  | 2.85  | -0.88 | 0.21  | 0.07  | 3.37 | 1.87 | 1.83 | 11.09 | -0.60 | 7.06 |
| 85TTH4F     | 8361      | NM_033440    | 1780 | 1.18  | 1.89  | 0.96  | -0.88 | -0.88 | -1.41 | 2.34 | 3.69 | 4.13 | 4.13  | -2.28 | 7.06 |
| 84527       | NM_032497 | 1781         | 0.53 | -0.28 | 1.24  | -1.15 | -1.65 | -1.19 | 0.30  | 2.84 | 3.92 | 0.42 | 0.42  | -2.98 | 7.06 |
| SPBNI1      | 6711      | NM_178131    | 1782 | 1.35  | 2.21  | 1.03  | -0.08 | -0.70 | -0.80 | 2.29 | 3.04 | 1.72 | 4.59  | -1.57 | 7.06 |
| 90137       | NM_032523 | 1783         | 0.28 | 0.95  | 0.43  | -1.18 | -1.35 | -1.35 | -1.35 | 3.56 | 1.49 | 1.63 | 4.57  | -1.27 | 7.05 |
| ELAVL3      | 1995      | NM_032281    | 1784 | 0.70  | 0.73  | 0.75  | -1.02 | -1.41 | -1.90 | 1.17 | 1.86 | 4.02 | 2.18  | -4.33 | 7.05 |
| SUCR3A2     | 29986     | NM_014579    | 1785 | 1.76  | 1.44  | 1.19  | -0.85 | -0.76 | -1.11 | 1.75 | 2.13 | 3.17 | 4.39  | -2.72 | 7.05 |
| DNH         | 1017      | NM_032519    | 1786 | 0.31  | 0.59  | 1.47  | -0.76 | -1.07 | -1.07 | 0.77 | 3.82 | 2.07 | 3.37  | -1.89 | 7.05 |
| MBO1A1      | 85509     | NM_145208    | 1787 | 0.04  | -0.10 | 1.12  | -0.97 | -1.49 | -1.65 | 1.33 | 1.37 | 4.33 | 0.98  | -4.11 | 7.04 |
| DMRT3       | 58524     | NM_021240    | 1788 | 0.74  | 2.40  | 1.62  | -1.51 | -1.17 | -0.71 | 1.29 | 3.84 | 1.91 | 4.76  | -3.39 | 7.04 |
| ORZT3       | 34373     | NM_00105495  | 1789 | -0.26 | 0.67  | -0.84 | -1.72 | -2.26 | -2.13 | 4.45 | 1.56 | 1.01 | -1.77 | -6.11 | 7.03 |
| KIA0253     | 23302     | NM_018491    | 1790 | 0.67  | 1.32  | 2.52  | -0.90 | -0.66 | -1.51 | 1.27 | 1.28 | 4.61 | 4.51  | -0.82 | 7.03 |
| LOC55871    | 55871     | NM_018491    | 1791 | 1.64  | 0.82  | 1.51  | -0.78 | -0.95 | -0.68 | 3.55 | 1.65 | 1.82 | 3.97  | -2.41 | 7.03 |
| RARE51      | 5918      | NM_002888    | 1792 | 2.67  | 0.18  | -0.36 | -1.76 | -1.73 | -1.77 | 4.61 | 1.67 | 0.74 | 2.49  | -5.26 | 7.02 |
| ZNF139      | 7697      | NM_006224    | 1793 | 1.47  | 1.85  | 1.12  | -0.23 | -1.23 | -0.40 | 1.73 | 3.86 | 1.43 | 4.45  | 1.86  | 7.01 |
| MESD2       | 23184     | NM_015154    | 1794 | 0.27  | 0.43  | 0.57  | -1.64 | -1.01 | -1.19 | 2.71 | 2.33 | 1.97 | 1.27  | -1.84 | 7.01 |
| DNFZP34K181 | 222229    | NM_152892    | 1795 | 0.92  | 2.51  | 1.36  | -0.50 | -0.61 | -0.43 | 1.77 | 3.54 | 1.68 | 4.78  | -1.54 | 7.01 |
| LOC52       | 11856     | NM_007010    | 1796 | 0.20  | 0.82  | -0.12 | -1.67 | -1.67 | -1.63 | 2.79 | 2.61 | 1.59 | 0.86  | -4.96 | 6.99 |
| HE2         | 10471     | NM_014260    | 1797 | 0.49  | 0.20  | 0.94  | -1.17 | -0.78 | -1.32 | 2.57 | 1.56 | 2.86 | 1.62  | -3.27 | 6.99 |
| SUGA6       | 6533      | NM_003043    | 1798 | 0.62  | 0.06  | -0.01 | -1.73 | -1.74 | -1.77 | 2.86 | 2.36 | 1.77 | 0.67  | -5.24 | 6.99 |
| NKCAM       | 4897      | NM_00103123  | 1799 | 2.79  | 0.26  | 0.54  | -0.42 | 1.12  | 1.21  | 5.72 | 1.18 | 0.08 | 3.59  | 1.90  | 6.98 |
| RABRP1      | 23258     | NM_015113    | 1800 | -0.09 | 1.92  | 0.38  | -1.51 | -1.47 | -1.40 | 1.20 | 3.59 | 2.59 | 2.20  | -4.39 | 6.98 |
| GSTM3       | 2947      | NM_000849    | 1801 | -0.53 | -0.24 | -0.96 | -1.98 | -1.71 | -2.04 | 2.71 | 2.51 | 1.76 | -1.73 | -5.74 | 6.98 |
| DNFZP86G101 | 341405    | NM_001130015 | 1802 | 1.14  | 5.97  | 0.98  | 0.61  | 1.29  | 0.93  | 0.20 | 4.85 | 1.92 | 7.09  | 2.83  | 6.98 |
| LOC318879   | 338879    | NM_000129015 | 1803 | 0.07  | 0.07  | 0.07  | -0.07 | -0.07 | -0.07 | 2.30 | 2.60 | 1.80 | 0.40  | -5.20 | 6.98 |
| CBX3        | 11335     | NM_002726    | 1804 | 2.26  | 1.55  | 1.70  | -0.34 | -0.70 | 0.79  | 3.15 | 3.00 | 0.82 | 5.51  | -0.25 | 6.97 |
| MAP1L3B     | 81631     | NM_022818    | 1805 | 1.47  | 2.04  | 2.12  | -0.77 | -0.29 | -0.68 | 1.79 | 2.32 | 2.86 | 5.63  | -1.74 | 6.97 |
| MAF3P1      | 26146     | NM_014550    | 1806 | 1.40  | 0.40  | 1.52  | -1.55 | -1.55 | -1.55 | 0.41 | 3.12 | 1.55 | 0.64  | 0.67  | 6.97 |
| OR888       | 26493     | NM_012378    | 1807 | 0.69  | -0.27 | 0.11  | -1.80 | -1.53 | -1.40 | 3.72 | 1.89 | 1.36 | 1.64  | -4.74 | 6.97 |
| SUC16A14    | 151473    | NM_152527    | 1808 | 2.48  | 0.96  | 2.31  | -1.30 | -1.07 | -1.00 | 3.18 | 1.15 | 2.64 | 5.75  | -3.37 | 6.96 |
| NANOS2      | 33945     | NM_00129861  | 1809 | 1.75  | 1.79  | 1.60  | -0.08 | -0.12 | -0.62 | 2.59 | 2.05 | 2.32 | 5.14  | -0.82 | 6.96 |
| SUC5C2      | 51006     | NM_178073    | 1810 | 0.08  | 0.03  | 0.40  | -0.57 | -0.62 | -0.59 | 0.57 | 0.93 | 0.42 | 0.57  | -0.82 | 6.96 |
| ZNF184      | 7738      | NM_007149    | 1811 | -0.31 | 0.30  | 0.77  | -1.33 | -0.62 | -1.92 | 0.84 | 1.74 | 4.38 | 0.77  | -3.87 | 6.96 |
| GNAZ        | 2781      | NM_002073    | 1812 | 1.42  | 1.24  | 0.84  | -0.10 | -1.20 | -1.20 | 1.18 | 3.26 | 2.51 | 3.49  | -2.37 | 6.96 |
| ICG4        | 8447      | NM_030411    | 1813 | 1.42  | 0.98  | 1.18  | -0.62 | -0.62 | -0.62 | 1.42 | 2.63 | 1.88 | 12.62 | 1.28  | 6.96 |
| CFB2A73     | 863       | NM_175931    | 1814 | -0.75 | 2.01  | 6.26  | -2.70 | 0.05  | 0.09  | 0.80 | 2.77 | 3.37 | 7.52  | -2.56 | 6.95 |
| GUC1A1      | 2979      | NM_000409    | 1815 | 1.54  | 0.56  | 0.58  | -0.82 | -0.68 | -0.67 | 3.34 | 1.95 | 1.65 | 2.67  | -2.16 | 6.95 |
| LOC18335    | 16282     | NM_001228    | 1816 | -0.40 | 0.25  | 0.29  | -0.40 | -0.25 | -0.40 | 2.19 | 1.02 | 2.14 | 6.45  | -1.37 | 6.94 |
| PT1         | 10066     | NM_183386    | 1817 | 4.32  | 2.76  | 1.15  | -0.06 | -0.34 | -0.51 | 3.36 | 2.36 | 1.23 | 3.23  | 0.91  | 6.94 |
| MGC50273    | 408029    | NM_214461    | 1818 | 3.20  | 0.56  | -0.11 | -0.25 | -0.63 | -1.17 | 3.22 | 1.69 | 2.03 | 3.65  | -2.05 | 6.94 |
| MAGEC3      | 139881    | NM_177456    | 1819 | 0.92  | -0.05 | 2.03  | -0.54 | -1.05 | -0.91 | 3.61 | 1.50 | 1.83 | 2.89  | -2.50 | 6.93 |
| OSGAC       | 126024    | NM_131618    | 1820 | 0.70  | 0.80  | 0.61  | -0.70 | -0.61 | -0.70 | 0.80 | 0.61 | 0.70 | 0.80  | -0.61 | 6.93 |
| PTPRB       | 5787      | NM_002837    | 1821 | 1.64  | 1.33  | 0.86  | -0.34 | -1.62 | -0.63 | 2.33 | 1.17 | 1.42 | 3.83  | -2.59 | 6.93 |
| LSM7        | 51690     | NM_016199    | 1822 | -0.29 | -0.90 | -0.36 | -1.84 | -2.71 | -2.17 | 1.23 | 2.85 | 2.85 | -1.55 | -6.72 | 6.93 |
| SUC51B1     | 10569     | NM_005446    | 1823 | 1.46  | 1.70  | 1.64  | -0.68 | -1.06 | -1.06 | 1.58 | 2.68 | 2.68 | 4.11  | 2.85  | 6.91 |
| CE1         | 153571    | NM_178569    | 1824 | 4.53  | 5.52  | 3.06  | -0.28 | 0.01  | 0.52  | 2.07 | 3.42 | 1.42 | 13.11 | 0.25  | 6.91 |
| KUA         | 387521    | NM_199129    | 1825 | 1.34  | 2.86  | 2.59  | -0.45 | -1.04 | -0.15 | 1.15 | 3.62 | 2.13 | 6.79  | -1.64 | 6.91 |
| DFR126      | 8149      | NM_001391    | 1826 | 1.44  | 1.43  | 1.51  | -0.49 | -0.49 | -0.49 | 2.65 | 2.49 | 1.93 | 4.86  | 0.60  | 6.91 |
| VEGF8       | 7423      | NM_003377    | 1827 | -0.86 | 1.16  | -0.36 | -1.91 | -1.47 | -1.39 | 3.10 | 1.50 | 1.00 | -0.07 | -4.77 | 6.91 |
| KCTD4       | 386618    | NM_198424    | 1828 | 0.19  | 0.34  | 0.42  | -1.60 | -1.54 | -1.53 | 2.50 | 1.88 | 2.52 | 0.95  | -4.68 | 6.90 |
| FLJ2427     | 174798    | NM_198529    | 1829 | 1.48  | 3.41  | 2.05  | -0.10 | -0.28 | -0.68 | 1.40 | 3.16 | 2.31 | 6.94  | -1.05 | 6.90 |
| GR44        | 1125      | NM_004778    | 1830 | 0.03  | 0.22  | 0.40  | -1.59 | -1.59 | -1.59 | 3.03 | 2.49 | 1.61 | 5.98  | -1.48 | 6.90 |
| CELSR3      | 1951      | NM_001407    | 1831 | 0.18  | 0.59  | 0.26  | -0.68 | -0.92 | -1.19 | 1.88 | 2.86 | 2.16 | 1.03  | -2.79 | 6.90 |
| ORX1        | 190260    | NM_00105588  | 1832 | -0.37 | 0.81  | -0.04 | -1.95 | -1.88 | -1.12 | 0.70 | 4.18 | 2.02 | 0.41  | -4.94 | 6.89 |
| CDONF174    | 12861     | NM_006605    | 1833 | 1.18  | 1.48  | 1.48  | -1.11 | -1.48 | -1.11 | 1.48 | 1.48 | 1.48 | 1.94  | 1.94  | 6.89 |
| MAF1        | 84332     | NM_012272    | 1834 | 2.52  | 2.06  | 3.00  | -0.40 | -0.45 | -1.05 | 1.94 | 1.64 | 3.31 | 7.59  | -1.90 | 6.89 |
| NPL4        | 55666     | NM_017921    | 1835 | 0.50  | 0.31  | 0.41  | -1.56 | -1.02 | -1.27 | 2.65 | 1.96 | 2.28 | 1.22  | -3.85 | 6.88 |
| LOC52345    | 92189     | NM_001128931 | 1836 | 4.20  | 2.50  | 1.78  | -0.60 | -0.60 | -0.60 | 2.56 | 2.61 | 1.50 | 8.42  | -1.02 | 6.88 |
| TADA3L      | 10474     | NM_133481    | 1837 | 1.82  | 2.29  | 2.14  | -0.18 | -0.18 | -0.18 | 2.36 | 2.93 | 1.50 | 6.29  | -0.03 | 6.88 |
| HDFG2       | 84717     | NM_032631    | 1838 | 0.29  | 0.13  | 0.72  | -1.34 | -1.84 | -1.52 | 1.75 | 1.51 | 3.62 | 1.14  | -4.69 | 6.88 |
| AP1         | 9803      | NM_012101    | 1839 | 1.60  | 0.50  | 2.27  | -1.03 | -1.30 | -0.24 | 2.38 | 2.43 | 2.06 | 4.37  | -2.09 | 6.87 |
| 79405       | NM_024505 | 1840         | 0.34 | 1.56  | 0.35  | -0.74 | -0.18 | -0.18 | -0.18 | 1.14 | 2.06 | 1.88 | 3.93  | 1.68  | 6.87 |
| TSNAXP1     | 55815     | NM_018430    | 1841 | 0.64  | 0.39  | 0.57  | -1.23 | -0.75 | -1.27 | 3.11 | 1.34 | 2.41 | 1.59  | -3.26 | 6.86 |
| BANF1       | 8815      | NM_003860    | 1842 | 0.15  | 0.25  | 0.93  | -0.62 | -1.46 | -1.67 | 0.24 | 3.01 | 3.62 | 1.33  | -3.74 | 6.86 |
| NPTF5H      | 11188     | NM_005012    | 1843 | 1.02  | 1.56  | 1.79  | -1.67 | -1.67 | -1.67 | 2.60 | 2.19 | 1.67 | 5.02  | -1.44 | 6.86 |
| HIC         | 29669     | NM_199072    | 1844 | 0.42  | 0.78  | 3.00  | -1.24 | -1.33 | -1.16 | 2.23 | 2.46 | 2.16 | 1.50  | -3.73 | 6.85 |
| NKMRD32     | 84250     | NM_032290    | 1845 | 2.70  | 0.60  | 0.98  | -0.63 | -0.18 | -0.49 | 3.81 | 0.80 | 2.24 | 4.27  | -1.30 | 6.85 |
| LOC11703    | 5489      | NM_001703    | 1846 | 1.74  | 0.72  | 1.25  | -0.88 | -0.56 | -1.29 | 0.80 | 1.88 | 1.88 | 2.86  | -2.86 | 6.84 |
| FLJ3527     | 256364    | NM_153265    | 1847 | 2.38  | 2.45  | 1.77  | -0.19 | -0.78 | -0.28 | 1.78 | 2.96 | 2.10 | 6.79  | -0.69 | 6.84 |
| SSR4        | 6748      | NM_006280    | 1848 | -2.11 | 3.50  | 2.01  | -1.26 | -0.05 | -0.39 | 1.92 | 3.10 | 1.82 | 7.62  | -1.70 | 6.83 |
| DFR125      | 245938    | NM_153235    | 1849 | -0.10 | 0.71  | 1.29  | -1.50 | -1.03 | -1.13 | 1.91 | 2.16 | 2.77 | 1.90  | -1.64 | 6.83 |
| TSNAXM1     | 17075     | NM_130759    | 1850 | 1.89  | 0.89  | 1.42  | -0.43 | -0.43 | -0.43 | 1.50 | 3.12 | 3.12 | 5.18  | -1.96 | 6.83 |
| TPOST1      | 23430     | NM_012217    | 1851 | 1.36  | 1.49  | 0.84  | -0.84 | -0.84 | -1.00 | 1.80 | 2.01 | 3.03 | 3.69  | -3.20 | 6.83 |
| CART1       | 8092      | NM_006982    | 1852 | 0.59  | 1.81  | 1.38  | -0.37 | -0.30 | -1.01 | 1.01 | 2.86 | 2.96 | 3.78  | -1.68 | 6.83 |
| STGAL2      | 8453      | NM_002328    | 1853 | 0.83  | 0.59  | 0.69  | -0.63 | -0.63 | -0.63 | 1.23 | 1.27 | 0.63 | 0.97  | -0.87 | 6.83 |
| ARG2        | 384       | NM_001172    | 1854 | 2.17  | 1.51  | 0.95  | -0.69 | -0.57 | -0.45 | 3.59 | 1.85 | 1.38 | 4.63  | -1.71 | 6.82 |
| MCC14161    | 84978     | NM_          |      |       |       |       |       |       |       |      |      |      |       |       |      |

|            |        |              |      |       |       |       |       |       |       |       |      |      |       |       |      |
|------------|--------|--------------|------|-------|-------|-------|-------|-------|-------|-------|------|------|-------|-------|------|
| TM11       | 7073   | NM_003252    | 1937 | 2.55  | 1.80  | 1.46  | -0.88 | -0.97 | -0.13 | 2.51  | 3.52 | 0.56 | 5.82  | -1.73 | 6.59 |
| SC41       | 6319   | NM_003323    | 1938 | 1.78  | 2.46  | 1.19  | -0.62 | -0.98 | 0.33  | 2.13  | 1.83 | 0.28 | 4.41  | 1.68  | 6.58 |
| TRM49      | 57993  | NM_020358    | 1939 | 9.00  | 13.97 | 7.33  | -0.66 | 1.01  | 1.09  | 3.17  | 2.08 | 1.33 | 30.31 | 1.44  | 6.58 |
| UPK38      | 80761  | NM_182684    | 1940 | 1.03  | 2.23  | 1.58  | -0.66 | -1.17 | -1.33 | 1.68  | 2.65 | 2.26 | 4.83  | -3.16 | 6.58 |
| MFZL1      | 9039   | NM_024569    | 1941 | 2.24  | 2.85  | 2.36  | 0.50  | -0.46 | -0.93 | 0.65  | 2.89 | 3.04 | 7.65  | -0.28 | 6.58 |
| FMED1C11   | 7983   | NM_011818    | 1942 | 1.29  | 1.15  | 0.61  | -0.52 | -0.61 | -0.56 | 0.86  | 2.63 | 0.96 | 3.56  | 0.01  | 6.58 |
| MEDE       | 10001  | NM_005466    | 1943 | 2.00  | -0.47 | -0.67 | -2.07 | -2.07 | -1.75 | 4.17  | 1.96 | 0.46 | -0.94 | -5.89 | 6.58 |
| CS72       | 1470   | NM_001232    | 1944 | 1.66  | 1.64  | 0.79  | -0.67 | -0.01 | 1.09  | 2.49  | 3.08 | 1.01 | 3.50  | 0.40  | 6.58 |
| FL11752    | 9224   | NM_012821    | 1945 | 1.23  | 1.28  | 0.76  | -0.57 | -0.57 | -0.57 | 1.61  | 1.97 | 1.28 | 3.68  | 1.65  | 6.58 |
| TM002      | 29767  | NM_014548    | 1946 | 1.64  | 2.19  | 0.74  | -0.50 | -1.31 | -1.04 | 1.45  | 3.89 | 1.23 | 4.58  | -2.84 | 6.57 |
| CKHSF4     | 146223 | NM_178818    | 1947 | 2.31  | 2.81  | 1.64  | -0.77 | -0.13 | -0.42 | 2.18  | 2.63 | 1.76 | 6.77  | -1.32 | 6.57 |
| CTN1       | 40447  | NM_200833    | 1948 | 1.21  | -0.85 | 0.12  | -1.02 | -0.86 | -0.40 | 1.64  | 1.28 | 0.81 | 0.48  | -1.22 | 6.57 |
| SOCS2      | 8493   | NM_003877    | 1949 | 0.62  | 1.89  | 1.13  | -1.33 | -0.24 | -0.56 | 3.65  | 0.88 | 2.04 | 3.63  | -2.13 | 6.56 |
| CNTR8      | 1470   | NM_001232    | 1950 | 1.73  | 1.84  | 1.91  | -1.22 | -0.78 | -1.07 | 0.97  | 2.63 | 2.96 | 4.48  | -3.07 | 6.56 |
| CSN28      | 1460   | NM_001230    | 1951 | 0.77  | 0.55  | 1.16  | -0.82 | -0.75 | -0.88 | 2.84  | 1.79 | 1.94 | 3.88  | -4.25 | 6.56 |
| DCM12      | 5124   | NM_016580    | 1952 | 1.51  | 2.11  | 1.88  | -0.72 | -0.58 | -1.10 | 1.64  | 2.31 | 2.61 | 5.50  | -0.49 | 6.56 |
| HPR88P     | 9410   | NM_004814    | 1953 | 0.13  | 0.69  | 0.20  | -0.59 | -1.08 | -0.59 | 1.43  | 4.13 | 1.00 | 1.02  | -2.25 | 6.56 |
| HYL4       | 23553  | NM_012269    | 1954 | 2.02  | 2.25  | 1.31  | -1.58 | -0.39 | -0.73 | 3.24  | 1.87 | 1.44 | 5.89  | -2.70 | 6.55 |
| PTP81      | 9567   | NM_000426    | 1955 | -0.77 | -0.93 | 1.80  | -2.46 | -2.28 | -1.86 | 2.09  | 0.86 | 3.60 | 0.18  | 6.59  | 6.55 |
| PRF31      | 26121  | NM_015629    | 1956 | -0.08 | -0.23 | -0.24 | -2.04 | -1.58 | -2.01 | 2.73  | 1.76 | 2.06 | -0.55 | -5.63 | 6.55 |
| ZCWPV1     | 55063  | NM_017884    | 1957 | 3.71  | 1.81  | 2.21  | 0.18  | -0.09 | -0.45 | 3.46  | 1.29 | 1.79 | 7.73  | -0.36 | 6.55 |
| FLJ2296    | 44647  | NM_153006    | 1958 | 1.20  | 1.91  | 0.88  | -0.77 | -0.59 | -0.94 | 2.61  | 2.00 | 1.93 | 4.00  | -2.30 | 6.55 |
| SLCO41     | 28231  | NM_016354    | 1959 | 0.96  | 1.42  | 0.19  | -1.75 | -1.53 | -0.75 | 2.25  | 3.52 | 0.77 | 2.17  | -4.03 | 6.54 |
| POLRMT     | 5442   | NM_005035    | 1960 | 2.21  | 0.08  | 1.30  | -1.21 | -0.51 | -0.56 | 4.23  | 1.31 | 1.00 | 3.58  | -2.28 | 6.54 |
| FLI4721    | 84915  | NM_012829    | 1961 | 0.59  | 0.67  | 1.17  | -1.07 | -1.19 | -0.74 | 2.39  | 2.28 | 1.88 | 2.44  | -3.00 | 6.54 |
| SR140      | 23150  | NM_001000415 | 1962 | 0.45  | -0.40 | -0.03 | -0.66 | -0.85 | -0.07 | 3.13  | 1.73 | 1.68 | 0.09  | -2.18 | 6.54 |
| PSFL       | 83464  | NM_031301    | 1963 | 3.70  | 1.05  | 1.75  | -0.30 | -1.38 | -0.78 | 2.20  | 2.00 | 2.33 | 6.50  | -2.46 | 6.53 |
| ITGA2      | 3673   | NM_002203    | 1964 | 1.57  | 3.31  | 0.59  | -1.00 | -0.71 | -1.00 | 2.53  | 2.80 | 1.20 | 5.47  | -2.73 | 6.53 |
| NM442      | 5871   | NM_000579    | 1965 | 0.42  | 1.16  | 0.28  | -0.42 | -1.16 | -1.13 | 1.22  | 2.32 | 0.66 | 3.86  | 1.48  | 6.53 |
| IFZS1      | 1965   | NM_004094    | 1966 | 0.25  | -0.11 | 0.09  | -0.66 | -0.53 | -0.88 | 2.50  | 1.69 | 2.35 | 0.23  | -2.08 | 6.53 |
| C10R0F11   | 83938  | NM_032024    | 1967 | 1.82  | 2.36  | 0.82  | -0.67 | -1.07 | -1.23 | 1.61  | 3.11 | 1.81 | 5.01  | -2.96 | 6.53 |
| 2N225      | 776    | NM_002362    | 1968 | 3.95  | 2.73  | 2.57  | -2.35 | -1.87 | -2.35 | 1.80  | 2.35 | 1.80 | 9.25  | -0.47 | 6.52 |
| PFK84      | 5210   | NM_004567    | 1969 | 4.60  | 1.95  | 1.82  | -0.68 | -0.79 | -0.96 | 2.24  | 1.94 | 2.34 | 8.38  | -1.83 | 6.52 |
| C110R0F1   | 64776  | NM_022761    | 1970 | 2.38  | 2.51  | 0.92  | -1.41 | -0.70 | -1.21 | 3.58  | 1.62 | 1.32 | 5.82  | -3.32 | 6.51 |
| CLNCS      | 1134   | NM_000084    | 1971 | 0.61  | 1.58  | 0.94  | -1.34 | -0.83 | -1.23 | 2.80  | 1.48 | 2.22 | 3.12  | -3.39 | 6.51 |
| FOA43      | 317    | NM_004987    | 1972 | 0.78  | 0.75  | 0.74  | -0.57 | -0.57 | -0.57 | 1.89  | 1.55 | 3.09 | 2.26  | -3.10 | 6.51 |
| ITGR2      | 3689   | NM_000211    | 1973 | 0.86  | 0.96  | 0.40  | -1.34 | -1.01 | -1.06 | 2.39  | 2.40 | 1.71 | 2.22  | -3.41 | 6.50 |
| D1220R8    | 57226  | NM_020466    | 1974 | 2.98  | 1.54  | 1.83  | -0.36 | -0.36 | -0.09 | 2.34  | 2.34 | 1.82 | 6.35  | -0.80 | 6.50 |
| NVW11      | 8697   | NM_003707    | 1975 | 0.16  | 0.21  | 0.21  | -0.16 | -0.16 | -0.16 | 1.64  | 2.12 | 1.64 | -0.38 | -2.17 | 6.50 |
| KIA0265    | 23008  | NM_014997    | 1976 | 1.25  | 1.09  | 1.07  | -0.56 | -0.79 | -1.19 | 1.82  | 2.36 | 2.31 | 3.42  | -5.24 | 6.49 |
| DEK13      | 91319  | NM_00102862  | 1977 | 0.27  | -0.83 | -1.12 | -2.26 | -2.05 | -2.51 | 2.36  | 1.54 | 2.60 | -2.21 | -6.81 | 6.49 |
| 5131       | 5131   | NM_00102862  | 1978 | 0.70  | -0.51 | 1.06  | -0.70 | -0.51 | -1.06 | 1.40  | 1.40 | 1.40 | 1.25  | -1.30 | 6.49 |
| GAT5       | 32954  | NM_178818    | 1979 | 2.31  | 2.13  | 1.41  | -0.54 | -0.83 | -0.85 | 2.05  | 2.64 | 1.79 | 5.85  | -2.22 | 6.48 |
| LOC81691   | 81691  | NM_030941    | 1980 | 1.11  | 0.69  | 0.78  | -0.46 | -0.55 | -1.09 | 1.78  | 1.75 | 2.96 | 2.57  | -2.10 | 6.48 |
| GTA5       | 22157  | NM_153099    | 1981 | 1.72  | 1.92  | 1.70  | -0.00 | -0.02 | -1.39 | 1.54  | 2.49 | 2.45 | 5.35  | -1.41 | 6.48 |
| 42421      | 160    | NM_130787    | 1982 | 1.58  | 1.10  | 1.06  | -0.47 | -0.47 | -2.41 | 2.43  | 1.73 | 3.74 | 3.74  | -2.17 | 6.48 |
| NURP2      | 10101  | NM_012225    | 1983 | 1.07  | 0.23  | 2.12  | -0.89 | -1.00 | -0.87 | 1.58  | 1.01 | 3.89 | 3.42  | -2.75 | 6.47 |
| HS01782    | 3294   | NM_002153    | 1984 | 3.38  | 1.86  | -0.06 | -0.21 | -0.23 | -1.62 | 3.35  | 2.53 | 0.59 | 5.18  | -2.05 | 6.47 |
| 64159      | 64159  | NM_00103701  | 1985 | 0.66  | 1.50  | 0.72  | -0.62 | -0.62 | -0.62 | 1.62  | 1.62 | 1.62 | 2.82  | -2.25 | 6.47 |
| GP850      | 9248   | NM_004224    | 1986 | 2.76  | 2.59  | 3.99  | -0.18 | -0.08 | 0.71  | 1.51  | 2.90 | 2.06 | 9.34  | 0.82  | 6.47 |
| RK1        | 79192  | NM_024337    | 1987 | 0.17  | 0.27  | 0.26  | -1.61 | -1.33 | -1.62 | 2.41  | 1.73 | 2.32 | 0.71  | -4.56 | 6.46 |
| F0ND4      | 2289   | NM_002805    | 1988 | -0.52 | -0.68 | 0.65  | -0.68 | -0.68 | -0.65 | 1.59  | 2.45 | 2.65 | -0.73 | -5.32 | 6.46 |
| CG-69      | 51629  | NM_016016    | 1989 | 0.70  | 0.70  | -0.18 | -1.84 | -2.15 | -1.84 | 3.11  | 0.86 | 2.49 | 4.58  | -5.83 | 6.46 |
| GAS7       | 8522   | NM_003644    | 1990 | 0.09  | 0.23  | 1.20  | -0.94 | 0.85  | -1.08 | -0.12 | 0.17 | 6.41 | 1.53  | -0.72 | 6.46 |
| ITGA3      | 3675   | NM_005501    | 1991 | 0.13  | 1.06  | 1.77  | -0.24 | -0.92 | -1.13 | 0.33  | 1.86 | 4.27 | 2.95  | -2.27 | 6.46 |
| FAM24A     | 11860  | NM_00102868  | 1992 | 0.22  | 0.66  | 0.67  | -0.66 | -1.09 | -1.63 | 1.83  | 3.00 | 3.56 | 3.64  | -3.57 | 6.46 |
| HSF2       | 3298   | NM_004094    | 1993 | 5.45  | 2.40  | 2.27  | -0.34 | -0.06 | -0.48 | 3.77  | 1.38 | 1.30 | 10.13 | -0.87 | 6.45 |
| CDR0F21    | 285175 | NM_182587    | 1994 | 4.08  | 2.22  | 1.55  | -0.41 | -0.28 | 0.29  | 2.75  | 2.96 | 0.75 | 7.85  | -4.00 | 6.45 |
| KIA1034    | 2315   | NM_012826    | 1995 | 1.37  | 1.60  | 1.04  | -2.07 | -2.02 | -1.92 | 2.07  | 2.02 | 1.92 | 4.01  | -1.07 | 6.44 |
| BAG3       | 9531   | NM_004281    | 1996 | 1.41  | 1.96  | 1.88  | -0.98 | -2.04 | -2.28 | 3.96  | 1.25 | 1.23 | 5.25  | 1.34  | 6.44 |
| ACP6       | 51205  | NM_016361    | 1997 | 2.34  | 0.88  | 1.20  | 0.12  | -0.41 | 0.71  | 2.59  | 1.89 | 1.96 | 4.42  | -1.00 | 6.44 |
| CS18B      | 23389  | NM_015360    | 1998 | 2.10  | 3.10  | 2.40  | -1.10 | -0.60 | -0.60 | 1.58  | 2.40 | 2.60 | 3.10  | 1.64  | 6.44 |
| TRMS-TRM34 | 445372 | NM_001003819 | 1999 | -0.25 | -0.26 | 0.10  | -1.52 | -2.02 | -1.78 | 1.70  | 2.01 | 2.72 | -0.41 | -5.33 | 6.43 |
| C10R0F84   | 63877  | NM_001134672 | 2000 | 0.14  | 0.44  | 1.67  | -1.28 | -0.37 | -1.31 | 1.20  | 2.49 | 2.74 | 2.25  | -2.96 | 6.43 |
| MD238      | 80308  | NM_025205    | 2001 | -0.57 | -0.18 | 0.99  | -1.73 | -1.89 | -1.64 | 1.22  | 1.94 | 3.27 | 0.14  | -5.26 | 6.43 |
| 55788      | 55788  | NM_002928    | 2002 | 0.57  | 0.65  | 0.97  | -0.58 | -0.58 | -0.58 | 1.58  | 1.58 | 1.58 | 3.19  | 2.74  | 6.43 |
| TAS2R14    | 50840  | NM_023922    | 2003 | -0.33 | -0.76 | -0.44 | -1.68 | -1.92 | -1.39 | 5.05  | 0.46 | 0.92 | -1.52 | -4.99 | 6.42 |
| CDR0F85    | 63027  | NM_021945    | 2004 | -0.77 | -0.83 | -0.62 | -1.70 | -1.29 | -0.60 | 2.04  | 1.88 | 2.50 | -2.22 | -3.59 | 6.42 |
| C10R0F10   | 1186   | NM_007021    | 2005 | 1.24  | 1.78  | 1.12  | -1.48 | -1.80 | -1.48 | 1.64  | 2.80 | 1.64 | 3.24  | -1.58 | 6.42 |
| GRP22      | 2845   | NM_005295    | 2006 | 3.83  | 1.85  | 2.76  | 0.61  | -0.09 | 1.04  | 2.25  | 1.79 | 2.38 | 8.45  | 1.56  | 6.42 |
| TM21       | 10972  | NM_006827    | 2007 | 2.99  | 2.48  | 5.27  | 1.14  | 1.51  | 0.75  | 1.93  | 1.03 | 3.46 | 10.74 | 3.41  | 6.41 |
| TRJ271     | 7979   | NM_002024    | 2008 | -0.38 | 0.30  | 0.83  | -1.68 | -1.62 | -1.68 | 1.48  | 1.20 | 1.60 | 0.75  | -4.38 | 6.41 |
| PP1C8      | 5500   | NM_206377    | 2009 | 1.98  | 1.22  | 1.60  | -0.42 | -1.02 | -1.02 | 1.92  | 0.94 | 3.55 | 5.16  | -1.74 | 6.41 |
| ADAR       | 101    | NM_015841    | 2010 | 1.91  | 0.50  | 0.52  | -0.99 | -1.09 | -1.23 | 3.57  | 1.37 | 1.46 | 2.93  | -3.31 | 6.41 |
| SLC16A9    | 22093  | NM_194298    | 2011 | 0.89  | 1.42  | 0.25  | -0.91 | -1.13 | -0.39 | 2.76  | 2.88 | 0.76 | 2.57  | -4.44 | 6.40 |
| MD31       | 5100   | NM_016090    | 2012 | 0.32  | 0.66  | 0.96  | -1.02 | -1.27 | -2.47 | 2.67  | 1.68 | 1.68 | 1.68  | -2.28 | 6.39 |
| CR31059    | 391059 | NM_001013660 | 2013 | 1.28  | 2.53  | 1.82  | -0.35 | -0.69 | -0.29 | 2.71  | 2.13 | 1.54 | 5.63  | -1.33 | 6.39 |
| CLN20      | 49861  | NM_00101366  | 2014 | 1.16  | 1.32  | 0.88  | 0.34  | -1.11 | -1.27 | 0.99  | 2.53 | 2.87 | 3.26  | -2.04 | 6.39 |
| THRA5      | 10025  | NM_005481    | 2015 | 0.42  | 0.66  | 0.48  | -0.48 | -0.48 | -0.48 | 1.72  | 1.87 | 0.65 | 1.52  | -1.55 | 6.39 |
| CLN16      | 10686  | NM_005580    | 2016 | 2.46  | 2.44  | 3.45  | -0.05 | -0.52 | -0.25 | 1.32  | 2.52 | 2.54 | 8.35  | -0.81 | 6.39 |
| SMURF      | 8926   | NM_0228      |      |       |       |       |       |       |       |       |      |      |       |       |      |

|           |        |              |      |       |       |       |       |       |       |      |      |       |       |       |      |
|-----------|--------|--------------|------|-------|-------|-------|-------|-------|-------|------|------|-------|-------|-------|------|
| GPR110    | 26697  | NM_025048    | 2099 | 1.21  | 2.12  | 1.72  | 0.53  | -0.20 | -0.64 | 1.47 | 2.39 | 2.30  | 5.75  | -0.31 | 6.16 |
| EP1C1     | 26697  | NM_025048    | 2100 | 0.52  | 1.01  | 1.26  | -0.44 | 0.18  | -1.94 | 2.51 | 1.17 | 2.41  | 7.58  | 0.53  | 6.16 |
| SH2B      | 25970  | NM_015503    | 2101 | 0.65  | 0.66  | -0.31 | -1.71 | -1.35 | -0.84 | 4.60 | 0.63 | 0.93  | -0.32 | -3.90 | 6.16 |
| NODAL     | 4838   | NM_018055    | 2102 | -0.22 | 2.89  | 3.00  | 0.34  | -0.18 | 2.04  | 0.04 | 3.62 | 2.49  | 5.68  | 2.19  | 6.16 |
| LR9       | 7904   | NM_017522    | 2105 | 0.28  | 0.63  | -0.38 | -1.17 | -2.07 | -1.90 | 1.05 | 3.72 | 1.38  | 0.54  | -5.34 | 6.15 |
| 40567     | 9358   | NM_00701869  | 2106 | 0.94  | 0.96  | 0.96  | 0.04  | 0.26  | -0.30 | 3.04 | 2.86 | 3.02  | 1.17  | -3.30 | 6.15 |
| FLU1454   | 79903  | NM_024845    | 2109 | 1.15  | 1.45  | 3.00  | -1.49 | -1.05 | -1.59 | 2.23 | 2.28 | 1.63  | 2.91  | -4.14 | 6.15 |
| CARD14    | 79092  | NM_025219    | 2106 | 0.83  | 1.48  | 0.91  | 2.23  | 0.78  | 1.11  | 0.99 | 5.25 | -0.09 | 8.72  | 4.12  | 6.14 |
| HLZ       | 991    | NM_011877    | 2110 | 1.15  | 1.83  | 1.83  | 0.17  | 0.12  | -0.12 | 2.27 | 3.78 | 1.82  | 2.99  | 2.59  | 6.14 |
| ONEC11    | 3175   | NM_004498    | 2108 | 0.87  | 1.72  | 0.00  | -1.00 | -0.72 | -0.09 | 1.49 | 3.72 | 0.93  | 2.29  | -0.91 | 6.14 |
| HRC       | 3270   | NM_002152    | 2109 | 1.20  | 3.21  | 0.72  | -0.60 | -0.29 | -0.70 | 1.62 | 3.08 | 1.42  | 5.14  | -1.69 | 6.12 |
| PTPR      | 5395   | NM_001383    | 2111 | 1.25  | 2.68  | 2.64  | 2.01  | 0.31  | 0.16  | 1.21 | 3.16 | 1.62  | 8.23  | 2.32  | 6.12 |
| FOX3      | 22889  | NM_014947    | 2111 | 1.35  | 0.96  | 2.20  | -0.86 | -0.36 | -0.62 | 2.38 | 1.25 | 2.49  | 4.51  | -1.84 | 6.12 |
| GTFC4     | 9329   | NM_012204    | 2112 | 1.09  | 1.30  | 0.20  | -0.80 | -1.54 | -1.32 | 1.20 | 3.04 | 1.88  | 2.60  | -3.67 | 6.12 |
| PCD7      | 10081  | NM_005707    | 2113 | -0.61 | -0.65 | -0.66 | -1.77 | -1.90 | -1.69 | 1.88 | 1.88 | 2.36  | -1.92 | -5.33 | 6.12 |
| CNE1      | 3382   | NM_170782    | 2114 | 1.17  | 0.34  | 2.68  | -0.91 | -0.81 | -0.84 | 1.82 | 0.90 | 3.40  | 4.19  | -3.56 | 6.12 |
| CYP2C9    | 1559   | NM_000771    | 2115 | 0.08  | 1.47  | 0.47  | -1.17 | -0.18 | -1.01 | 0.76 | 2.44 | 2.91  | 2.02  | -1.37 | 6.11 |
| MDN1      | 23195  | NM_014611    | 2116 | 1.99  | 1.65  | 2.30  | -0.90 | -1.04 | -0.43 | 1.94 | 2.12 | 2.05  | 5.94  | -2.37 | 6.11 |
| PCD10     | 9358   | NM_004728    | 2117 | 0.42  | 1.40  | 0.52  | -1.03 | -0.57 | -0.41 | 1.88 | 2.80 | 1.43  | 2.74  | 2.01  | 6.11 |
| COL9A1    | 1297   | NM_078485    | 2118 | 3.33  | 3.16  | 1.83  | 0.66  | -0.53 | -0.52 | 1.32 | 2.92 | 1.86  | 8.33  | -4.00 | 6.10 |
| PCDH11    | 83259  | NM_032971    | 2119 | 2.99  | 1.60  | 3.26  | -0.64 | 0.43  | 0.42  | 3.05 | 3.14 | 1.70  | 7.85  | 0.21  | 6.10 |
| ARID3C    | 138715 | NM_001017363 | 2120 | 1.45  | -0.12 | 0.14  | -1.40 | -1.52 | -0.80 | 3.59 | 1.79 | 0.72  | 1.47  | -3.72 | 6.10 |
| RPR8      | 10900  | NM_006695    | 2121 | 0.60  | 0.67  | 1.12  | -1.16 | -1.25 | -1.33 | 1.52 | 2.55 | 2.03  | 2.89  | -3.75 | 6.09 |
| LOC196346 | 196346 | KM_115100    | 2122 | 17.12 | 12.29 | 10.78 | 0.27  | 2.97  | 1.05  | 4.05 | 1.21 | 0.83  | 40.19 | 4.30  | 6.09 |
| CHD9F2    | 9678   | NM_014828    | 2123 | 0.43  | 3.52  | -1.18 | -2.39 | -2.01 | -1.32 | 4.47 | 2.46 | -0.83 | 2.77  | -5.72 | 6.09 |
| PAC902    | 11252  | NM_002729    | 2124 | 0.38  | -0.03 | -0.06 | -1.31 | -1.07 | -1.07 | 1.91 | 1.22 | 2.96  | 0.09  | -3.85 | 6.09 |
| FLU2955   | 374955 | NM_198546    | 2125 | 2.50  | 2.27  | 1.15  | -0.69 | -0.71 | -0.93 | 2.17 | 2.25 | 1.66  | 5.92  | -2.33 | 6.08 |
| KFBP8     | 23770  | NM_012181    | 2126 | 0.65  | 0.74  | -0.19 | -1.51 | -0.93 | -1.03 | 3.44 | 1.93 | 0.71  | 1.20  | -1.45 | 6.08 |
| PTP1B     | 7378   | NM_003364    | 2127 | 1.17  | 1.20  | 1.72  | -1.07 | -1.07 | -1.07 | 1.93 | 2.20 | 1.72  | 4.10  | -2.11 | 6.08 |
| ORS2      | 282755 | NM_01005492  | 2128 | 2.00  | 1.47  | 1.40  | -0.73 | 1.54  | -0.22 | 1.65 | 1.00 | 3.43  | 4.86  | 2.05  | 6.08 |
| FLU2952   | 253832 | NM_153251    | 2129 | 2.20  | 2.14  | 0.95  | -0.48 | -0.73 | -0.91 | 1.98 | 2.28 | 1.82  | 5.29  | -2.12 | 6.08 |
| FL121742  | 84169  | NM_012107    | 2130 | 2.01  | 2.66  | 0.07  | -0.66 | -0.46 | -0.60 | 2.18 | 2.46 | 1.05  | 5.55  | -1.38 | 6.07 |
| VP35      | 55737  | NM_018206    | 2131 | 0.24  | 1.51  | 1.07  | -0.64 | -1.07 | -1.45 | 0.16 | 2.28 | 3.63  | 2.82  | -3.16 | 6.07 |
| USP45     | 85015  | KM_371838    | 2132 | 1.98  | 1.98  | 1.26  | -1.10 | -0.53 | -0.53 | 1.93 | 2.01 | 2.13  | 5.22  | -2.17 | 6.07 |
| LOC90826  | 90826  | NM_138364    | 2136 | 1.46  | 1.08  | 0.91  | -0.68 | -1.12 | -0.97 | 2.38 | 2.23 | 1.46  | 3.45  | -2.76 | 6.07 |
| NM01214   | 83894  | NM_035256    | 2134 | 1.21  | 0.77  | 0.41  | -1.12 | -0.77 | -0.41 | 4.58 | 1.63 | 1.42  | 0.86  | -0.68 | 6.06 |
| IQCB1     | 9657   | NM_01023271  | 2135 | 2.96  | 1.14  | 1.29  | -0.52 | 0.83  | -0.41 | 3.20 | 1.05 | 1.81  | 5.39  | -0.11 | 6.06 |
| SNRP1     | 6627   | NM_003990    | 2136 | -0.79 | -0.55 | -0.59 | -2.45 | -2.00 | -2.44 | 2.07 | 1.79 | 2.20  | 1.93  | -0.89 | 6.06 |
| 902       | 902    | NM_003996    | 2136 | 0.69  | 0.13  | 1.65  | -1.16 | -1.16 | -1.16 | 0.72 | 3.69 | 1.21  | 3.72  | 2.76  | 6.06 |
| NM012112  | 94026  | KM_00171816  | 2138 | 1.13  | 2.45  | 2.38  | 0.00  | -0.54 | -0.54 | 2.75 | 2.86 | 2.45  | 5.96  | -1.13 | 6.05 |
| LOC90378  | 90378  | NM_138352    | 2139 | 0.89  | -0.33 | 0.99  | -1.44 | -1.30 | -0.85 | 2.98 | 0.47 | 2.60  | 1.54  | -3.59 | 6.05 |
| ITGAL3    | 6487   | NM_014970    | 2140 | 0.35  | 2.43  | 1.68  | -0.46 | -0.44 | -0.44 | 2.61 | 2.26 | 0.84  | 2.16  | 1.62  | 6.05 |
| MAD       | 4084   | NM_002357    | 2141 | 2.97  | 2.69  | 2.78  | -0.13 | 0.40  | -0.04 | 2.41 | 1.58 | 2.06  | 8.43  | 0.24  | 6.05 |
| FLU1955   | 133584 | NM_182801    | 2142 | 2.35  | 5.55  | 3.46  | 0.77  | 0.83  | 0.96  | 0.77 | 3.74 | 1.53  | 11.37 | 2.55  | 6.05 |
| PCDC2     | 54986  | NM_01040126  | 2143 | 0.46  | 1.57  | 0.41  | -1.21 | -1.48 | -0.88 | 1.13 | 4.30 | 0.61  | 2.33  | -3.57 | 6.04 |
| NM012125  | 8118   | NM_148070    | 2144 | 11.51 | 14.80 | 11.40 | 0.85  | 3.13  | 4.40  | 0.85 | 3.13 | 4.40  | 56.67 | 17.89 | 6.04 |
| LOC28331  | 28331  | NM_01037806  | 2145 | 0.30  | 1.25  | 0.07  | -1.37 | -1.32 | -0.78 | 2.65 | 2.48 | 0.92  | 1.72  | -3.47 | 6.04 |
| LOC348559 | 340559 | NM_00108175  | 2146 | 3.88  | 2.58  | 2.66  | -0.27 | 0.48  | 0.59  | 3.60 | 1.25 | 1.20  | 9.13  | 0.81  | 6.04 |
| PCCR      | 5582   | NM_018411    | 2147 | 0.09  | 0.64  | 0.61  | -1.17 | -1.17 | -1.17 | 1.17 | 1.17 | 1.17  | 1.17  | 1.17  | 6.04 |
| NACA      | 4666   | NM_005594    | 2148 | -1.13 | 0.74  | 0.37  | -1.20 | -2.24 | -1.76 | 0.70 | 1.75 | 4.99  | -1.51 | -5.20 | 6.03 |
| OR6B1     | 127066 | NM_01010918  | 2149 | 6.99  | 4.59  | 3.30  | 1.48  | 0.53  | 0.34  | 2.29 | 2.46 | 1.29  | 14.88 | 2.36  | 6.03 |
| PTP1B     | 7378   | NM_003364    | 2150 | 1.17  | 1.20  | 1.72  | -1.07 | -1.07 | -1.07 | 1.93 | 2.20 | 1.72  | 4.10  | -2.11 | 6.03 |
| MCS3894   | 265302 | NM_152914    | 2151 | -0.08 | -0.16 | 1.08  | -1.56 | -1.68 | -1.12 | 1.89 | 1.74 | 2.40  | 0.84  | -4.35 | 6.03 |
| OR6K2     | 81448  | NM_01005279  | 2152 | 3.62  | 2.62  | 3.49  | 0.09  | 0.01  | 0.18  | 1.84 | 1.88 | 2.31  | 9.73  | 0.28  | 6.03 |
| FG2       | 10875  | NM_006482    | 2153 | 1.42  | 0.98  | 0.35  | -0.62 | -0.69 | -0.35 | 2.86 | 2.27 | 0.89  | 2.75  | -1.86 | 6.02 |
| MTMR3     | 8897   | NM_153051    | 2154 | -2.19 | 1.32  | 0.41  | -1.32 | -1.32 | -1.32 | 1.78 | 1.01 | 1.52  | 7.53  | 0.04  | 6.02 |
| KIF3C     | 3797   | NM_002254    | 2155 | 1.57  | 0.27  | 0.81  | -0.59 | 1.14  | 1.62  | 2.80 | 1.25 | 1.97  | 2.66  | 3.36  | 6.02 |
| SA44      | 6291   | NM_006512    | 2156 | -0.65 | 0.08  | -0.42 | -1.00 | -2.24 | -2.00 | 0.92 | 3.34 | 1.75  | -0.99 | -6.21 | 6.01 |
| 5773      | 5773   | NM_003964    | 2157 | 0.89  | 0.53  | 0.45  | -0.59 | -0.59 | -0.59 | 1.37 | 2.02 | 2.49  | 0.83  | -1.88 | 6.01 |
| LPA       | 3988   | NM_002025    | 2158 | 1.18  | 1.77  | 0.84  | -0.71 | -1.03 | -0.91 | 1.66 | 2.86 | 1.49  | 3.79  | -2.66 | 6.01 |
| GPRC5D    | 55507  | NM_018654    | 2159 | 0.50  | 1.72  | 0.65  | -0.94 | -1.06 | -1.71 | 0.95 | 2.48 | 2.58  | 2.87  | -3.70 | 6.01 |
| PTP2B2B   | 5652   | NM_002076    | 2160 | 3.08  | 3.77  | 3.18  | -0.41 | -0.41 | -0.41 | 2.46 | 2.29 | 1.46  | 10.02 | -3.33 | 6.01 |
| RAB13     | 5972   | NM_002870    | 2161 | 3.39  | 2.46  | 2.66  | 0.30  | 0.50  | -0.26 | 2.24 | 1.33 | 2.43  | 6.52  | 0.54  | 6.00 |
| SDC1      | 6382   | NM_002997    | 2162 | -0.25 | 1.32  | -0.01 | -1.17 | -1.52 | -1.08 | 0.69 | 4.11 | 1.19  | 1.06  | -3.78 | 6.00 |
| CNE1      | 131534 | NM_136088    | 2163 | 1.77  | 2.32  | 2.41  | -0.29 | 0.19  | -0.19 | 2.80 | 1.72 | 1.48  | 8.50  | -3.60 | 6.00 |
| MCC11349  | 7956   | NM_002112    | 2164 | 0.34  | 1.38  | 1.31  | -0.36 | -0.36 | -0.36 | 2.34 | 1.41 | 1.41  | 1.41  | 2.92  | 6.00 |
| GPR62     | 118442 | NM_080865    | 2165 | -0.13 | -0.09 | 2.80  | -0.38 | -1.32 | 0.08  | 0.33 | 1.89 | 3.77  | 2.58  | -1.62 | 5.99 |
| KRTAP11-1 | 373780 | NM_175858    | 2166 | 4.27  | 3.08  | 2.07  | -0.28 | -0.68 | -0.28 | 2.63 | 2.18 | 1.18  | 9.42  | -1.24 | 5.99 |
| ST81      | 2245   | NM_01000526  | 2167 | 1.38  | 1.40  | 1.21  | -0.65 | -0.28 | -0.28 | 0.65 | 2.92 | 1.40  | 1.40  | 4.21  | 5.99 |
| RASGEF1C  | 254246 | NM_01031799  | 2168 | 0.13  | -0.52 | 1.12  | -0.99 | -0.72 | -0.62 | 2.73 | 0.19 | 3.07  | 0.74  | -2.57 | 5.99 |
| FLU2508   | 54955  | NM_017850    | 2169 | -0.06 | 6.71  | 1.04  | -1.25 | 0.01  | -0.91 | 0.54 | 3.30 | 2.15  | 7.69  | -2.15 | 5.99 |
| SLC34A4   | 12010  | NM_013313    | 2170 | 0.72  | 0.88  | 0.41  | -0.72 | -0.72 | -0.72 | 2.31 | 1.98 | 2.07  | 2.07  | -3.97 | 5.99 |
| PLS3      | 5358   | NM_005032    | 2171 | 2.57  | 2.00  | 1.38  | -0.77 | -0.18 | -0.23 | 2.79 | 2.20 | 0.99  | 5.95  | -1.18 | 5.99 |
| OSIP      | 1831   | NM_01015881  | 2172 | 0.57  | 0.85  | 1.64  | -1.05 | -0.96 | -0.56 | 1.76 | 2.41 | 1.81  | 3.05  | -2.57 | 5.98 |
| LOC19178  | 440003 | NM_01010922  | 2173 | 0.70  | 1.76  | 2.14  | -0.15 | -0.21 | -0.72 | 0.32 | 1.55 | 4.11  | 4.59  | -1.08 | 5.98 |
| LR1       | 5173   | NM_010637    | 2174 | 2.14  | 1.45  | 1.38  | -0.63 | -0.63 | -0.63 | 4.27 | 1.87 | 0.62  | 2.77  | 2.15  | 5.98 |
| SLC20B1   | 11309  | NM_007256    | 2175 | -0.23 | 0.34  | -0.17 | -1.12 | -1.85 | -1.99 | 1.23 | 3.08 | 1.67  | 3.08  | -5.92 | 5.98 |
| NKXN1A    | 3778   | NM_002247    | 2176 | 1.10  | 1.46  | 0.82  | -1.11 | -0.41 | -0.88 | 2.55 | 1.82 | 1.61  | 3.38  | -2.40 | 5.98 |
| LOC25585  | 8586   | NM_0103307   | 2177 | 1.80  | 1.42  | 1.62  | -1.58 | -1.52 | -1.42 | 1.58 | 1.42 | 1.62  | 5.24  | -1.80 | 5.98 |
| COL12     | 51001  | NM_015942    | 2179 | 4.28  | 3.96  | 3.15  | 1.37  | 1.59  | 1.77  | 2.03 | 2.66 | 1.28  | 11.38 | 4.73  | 5.97 |
| NM01010   |        |              |      |       |       |       |       |       |       |      |      |       |       |       |      |

|             |        |             |      |       |       |       |       |       |       |       |       |       |       |       |      |
|-------------|--------|-------------|------|-------|-------|-------|-------|-------|-------|-------|-------|-------|-------|-------|------|
| HPK3        | 10114  | NM_005734   | 2261 | 3.49  | 3.00  | 0.84  | -0.37 | -0.65 | -0.44 | 2.26  | 2.63  | 0.92  | 7.32  | -1.46 | 5.81 |
| SBP11       | 5489   | NM_001689   | 2062 | 0.46  | 0.79  | 1.78  | -0.19 | -0.38 | -0.41 | 1.78  | 1.88  | 0.28  | 2.76  | -1.70 | 5.81 |
| CZ1         | 25792  | NM_012127   | 2263 | 1.01  | 0.69  | 0.34  | -0.49 | 0.08  | -0.80 | 2.48  | 1.42  | 1.91  | 2.04  | -1.21 | 5.81 |
| TA1F11      | 6882   | NM_005643   | 2264 | 1.06  | 0.15  | 0.40  | 0.53  | -1.30 | -0.37 | 2.04  | 2.74  | 1.03  | 1.61  | -1.14 | 5.81 |
| PPR18       | 8553   | NM_003075   | 2265 | -0.51 | -1.06 | -1.11 | -2.59 | -2.25 | -2.13 | 2.92  | 1.40  | 1.48  | -2.68 | -6.97 | 5.81 |
| PMW2        | 1180   | NM_003975   | 2266 | 1.02  | 1.02  | 0.39  | -0.72 | -1.06 | -0.36 | 1.35  | 1.44  | 3.09  | 3.40  | -1.14 | 5.81 |
| POLR1C      | 9533   | NM_004875   | 2267 | 1.93  | 1.49  | 1.73  | -0.75 | -0.72 | -0.40 | 2.67  | 1.76  | 1.37  | 5.16  | -1.86 | 5.80 |
| SPR68       | 6730   | NM_014230   | 2268 | 4.93  | 2.82  | 1.32  | 0.78  | -0.18 | 1.08  | 3.82  | 1.83  | 0.15  | 9.08  | 1.68  | 5.80 |
| APR8        | 2669   | NM_001602   | 2269 | 1.24  | 1.53  | 1.14  | -0.18 | 0.59  | 0.32  | 2.18  | 1.59  | 1.62  | 6.71  | 0.16  | 5.80 |
| AP5         | 10603  | NM_020979   | 2270 | 1.68  | 0.13  | 0.05  | -1.53 | -1.34 | -0.48 | 4.06  | 1.30  | 0.44  | 1.86  | -3.36 | 5.80 |
| PPR8BP      | 5469   | NM_004774   | 2271 | -0.42 | -0.83 | 3.67  | -1.82 | 0.14  | -0.39 | 1.73  | 0.71  | 4.78  | 2.42  | -2.07 | 5.80 |
| CF3         | 2248   | NM_001307   | 2272 | 0.73  | 0.47  | 0.85  | -0.77 | -0.47 | -0.80 | 2.62  | 1.40  | 1.78  | 2.06  | -1.16 | 5.80 |
| CF2         | 8532   | NM_003652   | 2273 | 1.64  | 0.68  | 1.87  | -0.55 | -1.08 | -0.58 | 1.00  | 2.27  | 2.52  | 4.19  | -2.21 | 5.80 |
| ERBB3       | 2065   | NM_00105915 | 2274 | 0.21  | 0.64  | 1.36  | -0.69 | -0.43 | -0.96 | 1.45  | 1.38  | 2.96  | 2.21  | -2.08 | 5.79 |
| MAP1        | 9601   | NM_177977   | 2275 | -0.15 | 0.39  | 2.97  | -0.29 | 1.05  | -0.29 | -0.36 | 1.67  | 4.48  | 3.20  | 0.47  | 5.79 |
| DMC2        | 84652  | NM_024839   | 2276 | 1.89  | 1.87  | 1.61  | -0.77 | -0.50 | -0.59 | 1.66  | 1.16  | 2.96  | 5.38  | -2.27 | 5.79 |
| PRKCSH      | 5589   | NM_00101329 | 2277 | -0.52 | -0.97 | -1.31 | -2.04 | -1.86 | -1.76 | 4.92  | 1.00  | -0.14 | -2.80 | -5.66 | 5.78 |
| UNC2        | 22248  | NM_153371   | 2278 | 3.86  | 7.68  | 7.59  | -1.36 | -0.35 | -1.27 | 1.53  | 2.16  | 2.09  | 19.13 | -2.98 | 5.78 |
| CZOR30      | 27248  | NM_015701   | 2279 | 2.59  | 2.21  | 1.06  | -0.22 | -0.51 | -0.32 | 2.52  | 1.99  | 1.27  | 5.86  | 1.05  | 5.77 |
| SOCS7       | 30837  | NM_014598   | 2280 | 0.09  | 1.02  | 0.04  | -1.07 | -1.29 | -1.16 | 0.94  | 3.62  | 1.22  | 1.34  | -3.52 | 5.77 |
| LOC342132   | 342132 | NM_00104309 | 2281 | -0.17 | -0.02 | 2.03  | -1.16 | -1.30 | -1.17 | 0.66  | 1.01  | 4.09  | 1.84  | -3.63 | 5.77 |
| IGF1R       | 3480   | NM_000075   | 2282 | 2.52  | 3.05  | 1.56  | -0.62 | -0.86 | -0.57 | 1.69  | 2.88  | 1.15  | 7.12  | -2.05 | 5.77 |
| IMP41       | 3612   | NM_005536   | 2283 | -0.75 | 0.98  | 0.03  | -0.67 | -1.22 | -1.30 | 0.41  | 3.24  | 2.11  | 0.29  | -3.19 | 5.76 |
| NGG2        | 9542   | NM_013985   | 2284 | 0.86  | 1.14  | 1.24  | -0.57 | -0.34 | -1.05 | 1.06  | 1.85  | 2.85  | 3.24  | -1.95 | 5.76 |
| SHC3        | 28972  | NM_014641   | 2285 | 2.04  | 1.09  | 1.44  | -0.18 | -0.67 | -0.94 | 2.26  | 1.09  | 2.41  | 4.57  | -1.79 | 5.76 |
| OT04        | 23202  | NM_116613   | 2286 | 0.39  | 0.95  | 1.04  | -0.98 | -1.18 | -1.09 | 1.07  | 2.59  | 2.09  | 2.37  | -3.25 | 5.76 |
| MP95        | 64398  | NM_022474   | 2287 | 1.29  | 0.74  | 0.95  | -0.68 | -1.30 | -1.08 | 1.89  | 2.27  | 1.59  | 2.98  | -3.06 | 5.75 |
| KOXA2       | 3737   | NM_004974   | 2288 | 1.19  | 2.03  | 2.02  | -0.62 | -0.50 | -0.49 | 1.96  | 2.10  | 1.69  | 5.24  | -1.61 | 5.75 |
| TMR4        | 7099   | NM_001654   | 2289 | 0.02  | 0.22  | 0.77  | -0.68 | -0.49 | -0.80 | 0.82  | 0.86  | 1.27  | 1.52  | -2.34 | 5.74 |
| ALS2CR      | 66008  | NM_015049   | 2290 | 0.37  | 0.70  | 0.74  | -1.22 | -1.58 | -0.55 | 1.74  | 2.56  | 1.44  | 1.81  | -3.55 | 5.74 |
| RTN         | 6242   | NM_00101505 | 2291 | 0.29  | 1.26  | 1.19  | -1.79 | -0.91 | -0.99 | 1.49  | 2.28  | 1.97  | 2.74  | -3.69 | 5.74 |
| ITPM1       | 117    | NM_00202205 | 2292 | -4.53 | 3.64  | 4.45  | -1.13 | -2.03 | -2.46 | 1.13  | 2.04  | 1.65  | 10.63 | -6.85 | 5.74 |
| GFRA        | 2828   | NM_005282   | 2293 | 0.60  | -0.61 | -0.23 | -1.90 | -1.82 | -1.62 | 2.78  | 1.81  | 1.15  | 1.44  | -5.33 | 5.74 |
| FLU10211    | 55095  | NM_018028   | 2294 | 1.35  | 1.74  | 0.46  | -0.85 | -0.30 | -0.02 | 3.19  | 2.18  | 0.36  | 3.55  | -1.18 | 5.73 |
| CTAG1A      | 24810  | NM_139250   | 2295 | 0.02  | 1.18  | 1.01  | -0.91 | -0.95 | -1.09 | 0.49  | 2.47  | 2.77  | 2.17  | -2.91 | 5.73 |
| UCN2        | 9026   | NM_001998   | 2296 | 4.31  | 0.25  | 1.20  | -0.26 | -0.25 | -0.42 | 2.02  | 1.50  | 2.25  | 5.04  | -0.74 | 5.73 |
| HRK3        | 3104   | NM_005341   | 2297 | 0.89  | -0.09 | 0.09  | -1.79 | -1.27 | -1.35 | 3.53  | 0.90  | 1.30  | 0.88  | -4.41 | 5.73 |
| TEXT1       | 83659  | NM_053285   | 2298 | 0.16  | 0.45  | 0.88  | -0.49 | -0.78 | -0.75 | 1.51  | 2.03  | 2.19  | 1.49  | -2.03 | 5.73 |
| SLCO2A2     | 65729  | NM_020749   | 2299 | 1.08  | 0.36  | 1.66  | -1.14 | -0.59 | -0.81 | 2.55  | 0.86  | 1.12  | 1.54  | -1.86 | 5.73 |
| LSM8        | 51691  | NM_016200   | 2300 | -0.82 | -0.95 | -0.68 | -2.20 | -1.84 | -2.84 | 0.79  | -0.28 | 5.21  | -2.75 | -6.88 | 5.72 |
| RHOH        | 399    | NM_004310   | 2301 | 0.69  | 1.70  | 1.67  | -0.79 | -0.29 | -0.87 | 1.68  | 1.99  | 2.05  | 4.05  | -1.95 | 5.72 |
| PHNFP1      | 9865   | NM_001897   | 2302 | 3.83  | 1.51  | 1.67  | -0.50 | -0.25 | -0.67 | 4.48  | 0.17  | 0.88  | 6.60  | 0.43  | 5.68 |
| PHF17       | 79960  | NM_199320   | 2303 | 1.70  | 0.31  | 0.90  | -0.56 | -0.42 | -0.77 | 2.98  | 0.61  | 2.12  | 2.91  | -1.75 | 5.72 |
| UFDL1       | 7353   | NM_00103247 | 2304 | 1.16  | 0.62  | 1.30  | -1.43 | -0.75 | -0.59 | 2.31  | 1.53  | 1.88  | 3.08  | -2.77 | 5.72 |
| HCP         | 84525  | NM_139211   | 2305 | 1.50  | 2.11  | 4.07  | -1.35 | -1.51 | -0.10 | 1.21  | 1.97  | 2.54  | 7.68  | -2.96 | 5.72 |
| SHHCS       | 2592   | NM_001657   | 2306 | 0.78  | 0.29  | 0.45  | -0.78 | -0.29 | -0.51 | 4.03  | 0.89  | 1.61  | 0.96  | -0.95 | 5.71 |
| SNAPC3      | 66119  | NM_003084   | 2307 | 1.66  | -0.34 | 1.25  | -0.61 | -0.70 | -0.96 | 3.08  | 0.42  | 2.21  | 2.56  | -2.27 | 5.71 |
| IGALS8      | 3964   | NM_201545   | 2308 | 1.19  | -0.61 | 5.85  | -1.29 | -1.54 | -0.45 | 1.01  | 0.11  | 4.59  | 6.43  | -3.29 | 5.71 |
| REL1        | 597    | NM_005059   | 2309 | 0.56  | 1.00  | 1.05  | -0.66 | -0.50 | -0.42 | 1.66  | 2.52  | 1.62  | 2.39  | -0.96 | 5.71 |
| GP2         | 2826   | NM_016602   | 2310 | 0.78  | 1.67  | 1.17  | -0.40 | -0.80 | -0.45 | 1.06  | 3.39  | 1.26  | 3.62  | -1.66 | 5.71 |
| MCC1335     | 81577  | NM_008019   | 2311 | 0.38  | 0.37  | 0.42  | -1.45 | -1.45 | -1.12 | 2.18  | 2.09  | 1.44  | 1.17  | -4.02 | 5.71 |
| RA59        | 8418   | NM_01038010 | 2312 | 0.65  | 1.60  | 1.55  | -0.80 | -0.80 | -0.78 | 2.02  | 2.80  | 2.72  | 3.80  | -1.40 | 5.71 |
| TPSAB6      | 7105   | NM_003270   | 2313 | 5.45  | 3.24  | 3.19  | 1.65  | -0.73 | -0.53 | 1.89  | 2.24  | 1.57  | 11.89 | 0.39  | 5.70 |
| CZORF19     | 55857  | NM_018474   | 2314 | -0.72 | 0.34  | 0.69  | -1.41 | -1.13 | -1.25 | 0.59  | 1.89  | 3.22  | 0.31  | -3.79 | 5.70 |
| SNARC02     | 6403   | NM_003077   | 2315 | 2.80  | 2.92  | 3.08  | -0.41 | -0.77 | -0.09 | 1.62  | 2.08  | 2.00  | 8.61  | -0.38 | 5.70 |
| IGF2R       | 6468   | NM_197964   | 2316 | 0.07  | 1.25  | 1.20  | -0.57 | -0.18 | -0.80 | 0.82  | 0.86  | 1.12  | 8.22  | 1.13  | 5.70 |
| KDR         | 3791   | NM_002253   | 2317 | 0.59  | 0.91  | 1.09  | -0.88 | -1.12 | -0.81 | 2.53  | 1.88  | 1.30  | 2.59  | -2.82 | 5.69 |
| CZ3HAV1     | 56829  | NM_024625   | 2318 | 0.14  | 1.42  | -0.18 | -0.78 | -0.88 | -0.76 | 2.15  | 2.83  | 0.71  | 1.39  | -2.42 | 5.69 |
| ITRM2       | 11847  | NM_001211   | 2319 | 0.75  | 1.24  | 1.13  | -0.71 | -0.71 | -0.71 | 2.21  | 1.37  | 1.88  | 4.12  | -0.84 | 5.69 |
| NCN1        | 84276  | NM_023216   | 2320 | 2.29  | 0.92  | 1.47  | -0.89 | -0.44 | -0.83 | 2.58  | 1.54  | 1.56  | 4.88  | -2.16 | 5.68 |
| TM1         | 117531 | NM_138691   | 2321 | 4.79  | 2.10  | 1.22  | -0.06 | -1.01 | -1.27 | 1.75  | 1.89  | 2.04  | 8.11  | -3.24 | 5.68 |
| HT1280      | 3817   | NM_001801   | 2322 | 3.55  | 0.42  | 2.66  | -0.50 | -0.50 | -0.50 | 4.48  | 0.17  | 0.88  | 6.60  | 0.43  | 5.68 |
| OR2V2       | 28559  | NM_206880   | 2323 | 1.84  | 1.49  | 2.27  | -0.50 | -0.70 | 0.36  | 2.32  | 2.35  | 1.00  | 5.99  | -0.83 | 5.68 |
| SUC3A2      | 9962   | NM_005116   | 2324 | 0.40  | -0.22 | 1.23  | -1.64 | -1.55 | -1.19 | 1.63  | 0.65  | 3.40  | 1.05  | -4.38 | 5.68 |
| OTOF        | 9581   | NM_194323   | 2325 | 2.54  | 1.35  | 2.63  | 0.01  | -0.36 | -0.56 | 2.12  | 1.46  | 2.10  | 6.52  | -0.92 | 5.68 |
| CZORF70     | 55780  | NM_001841   | 2326 | 0.56  | 0.80  | 0.81  | -0.58 | -0.80 | -0.80 | 0.89  | 1.26  | 1.62  | 2.77  | -0.77 | 5.67 |
| FAM16A      | 8226   | NM_012080   | 2327 | 2.26  | 1.32  | 2.09  | -0.67 | -1.07 | -0.45 | 1.97  | 1.31  | 2.39  | 5.67  | -2.19 | 5.67 |
| SNARC01     | 6602   | NM_139071   | 2328 | 2.47  | 4.12  | 1.48  | 0.63  | 0.50  | 1.05  | 1.54  | 3.45  | 0.68  | 8.07  | 2.18  | 5.67 |
| IT13        | 7030   | NM_001621   | 2329 | 1.84  | 1.67  | 1.81  | -0.17 | -0.48 | -0.65 | 1.74  | 1.67  | 1.67  | 4.65  | -1.14 | 5.67 |
| PSMCG       | 5706   | NM_002806   | 2330 | -0.43 | -0.92 | -1.21 | -2.20 | -2.02 | -2.19 | 3.28  | 1.18  | 1.21  | -2.55 | -6.42 | 5.67 |
| ALDH2       | 217    | NM_000090   | 2331 | 0.76  | 0.92  | 2.20  | -0.90 | -0.63 | -0.73 | 1.59  | 1.41  | 2.67  | 3.68  | -2.26 | 5.67 |
| BTAP13-3    | 37960  | NM_015622   | 2332 | 2.61  | 2.49  | 1.75  | -0.22 | -0.13 | -0.29 | 2.82  | 1.82  | 1.22  | 6.85  | -2.62 | 5.67 |
| SF4         | 57794  | NM_172231   | 2333 | 0.87  | 1.06  | 0.77  | -0.57 | -0.34 | -0.52 | 0.45  | 6.22  | 0.10  | 6.80  | -1.43 | 5.67 |
| LOC7434243  | 84216  | NM_022256   | 2334 | 2.51  | 2.13  | 1.82  | -0.27 | -0.10 | -0.58 | 1.62  | 1.79  | 2.25  | 6.46  | -4.02 | 5.67 |
| ITIH3       | 3699   | NM_002217   | 2335 | 3.12  | 1.89  | 1.37  | -0.55 | -0.21 | -0.37 | 2.68  | 1.64  | 1.34  | 6.18  | -1.14 | 5.66 |
| DKFZP454042 | 8359   | NM_003435   | 2336 | 0.19  | 0.81  | 0.31  | -0.81 | -0.64 | -0.64 | 2.69  | 0.61  | 2.69  | 0.17  | 6.60  | 5.66 |
| TBK3        | 6926   | NM_005996   | 2337 | 0.98  | 2.13  | 2.59  | 0.72  | 0.85  | 0.10  | 0.26  | 1.19  | 4.21  | 5.70  | -1.67 | 5.66 |
| FBXL17      | 64839  | NM_022824   | 2338 | -0.44 | 0.25  | -0.30 | -1.41 | -1.79 | -1.85 | 1.36  | 2.78  | 1.51  | -0.49 | -5.05 | 5.65 |
| IT1D4       | 7262   | NM_003211   | 2339 | 0.52  | 0.07  | 0.63  | -0.71 | -0.44 | -0.66 | 2.01  | 2.65  | 1.71  | 1.44  | -0.15 | 5.65 |
| SNMH01      | 25939  | NM_015474   | 2340 | 0.57  | 0.05  | 1.06  | -0.16 | 0.42  | -1.62 | 0.82  | 0.00  | 4.83  | 1.58  | -1.36 | 5.64 |
| FBXO6       | 26270  | NM_018438   | 2341 | 1.90  | 2.55  | 2.32  | -0.78 | 0.04  | -0.74 | 0     |       |       |       |       |      |

|             |        |              |        |       |       |       |       |       |       |      |       |      |       |       |      |
|-------------|--------|--------------|--------|-------|-------|-------|-------|-------|-------|------|-------|------|-------|-------|------|
| ADPN        | 80339  | NM_025225    | 2423   | 1.76  | 0.90  | 1.13  | -1.06 | -1.13 | -0.92 | 3.02 | 1.28  | 1.20 | 3.79  | -3.11 | 5.50 |
| AES3        | 20439  | NM_022204    | 2424   | 1.05  | 1.70  | 0.31  | -0.81 | -1.07 | -0.98 | 1.23 | 2.60  | 1.67 | 2.46  | -2.70 | 5.05 |
| CD24        | 15498  | NM_013230    | 2425   | 1.38  | 0.83  | 2.28  | -0.77 | -0.61 | -0.12 | 1.71 | 1.10  | 2.69 | 4.49  | -1.50 | 5.50 |
| ZNF304      | 57343  | NM_020657    | 2426   | 1.31  | 1.52  | 1.37  | -0.69 | -0.43 | -0.43 | 2.05 | 1.71  | 1.73 | 4.19  | -1.54 | 5.50 |
| RHDM        | 23518  | NM_015361    | 2427   | 2.75  | 2.43  | 2.74  | -0.17 | 0.23  | -0.32 | 1.21 | 2.16  | 2.12 | 7.93  | -0.26 | 5.49 |
| MBE1L3      | 8445   | NM_02007102  | 2428   | 0.84  | 0.84  | 0.28  | -1.14 | -0.49 | -1.09 | 1.87 | 1.34  | 2.20 | 1.17  | -2.73 | 5.49 |
| PK1         | 5230   | NM_000291    | 2429   | 1.23  | 1.04  | 1.02  | -0.51 | -0.25 | -0.18 | 2.51 | 0.95  | 2.03 | 3.30  | -0.59 | 5.49 |
| H5GT1       | 11319  | NM_007265    | 2430   | 3.34  | 2.70  | 2.87  | -0.14 | -0.19 | -0.19 | 2.02 | 1.90  | 1.56 | 8.91  | -0.52 | 5.49 |
| MGC52022    | 37523  | NM_019563    | 2431   | 1.28  | 1.38  | 1.07  | -0.81 | -0.70 | -0.55 | 1.70 | 1.55  | 1.70 | 0.73  | 0.44  | 5.49 |
| SASH1       | 23328  | NM_015278    | 2432   | 1.59  | 0.87  | 1.14  | -0.86 | -0.28 | -0.58 | 2.55 | 1.60  | 1.34 | 3.60  | -1.72 | 5.49 |
| SFMA3C      | 10512  | NM_006379    | 2433   | 2.28  | 2.26  | 1.30  | -0.37 | -0.50 | -0.32 | 1.87 | 2.41  | 1.21 | 5.84  | -1.19 | 5.48 |
| DFR1        | 13666  | NM_016370    | 2434   | 4.68  | 0.48  | 1.10  | -0.34 | -0.69 | -1.38 | 1.11 | 1.53  | 1.11 | 1.61  | -0.76 | 5.48 |
| COL1A1      | 1277   | NM_000088    | 2435   | 0.45  | 1.10  | 0.55  | -0.50 | -0.96 | -0.92 | 1.30 | 1.87  | 2.31 | 1.10  | -2.37 | 5.47 |
| PANK4       | 55229  | NM_018216    | 2436   | 0.60  | -0.68 | -0.53 | -2.20 | -1.98 | -1.68 | 2.25 | 1.65  | 1.58 | -1.81 | -5.86 | 5.47 |
| STAT4       | 6775   | NM_003151    | 2437   | 0.40  | -0.72 | 0.43  | -0.97 | -1.62 | 0.48  | 3.70 | 1.32  | 0.45 | 0.11  | -1.13 | 5.47 |
| SLIT        | 51174  | NM_016275    | 2438   | 1.03  | 1.45  | 0.75  | -0.29 | -0.72 | -0.51 | 1.85 | 2.40  | 1.23 | 3.23  | -1.93 | 5.47 |
| LRR3C3      | 375387 | NM_198565    | 2439   | 1.01  | 0.65  | 0.77  | -0.62 | -0.89 | -0.44 | 2.92 | 1.54  | 1.01 | 2.42  | -1.95 | 5.47 |
| SCN11A      | 11280  | NM_014139    | 2440   | 3.29  | 3.61  | 2.60  | -0.08 | -0.57 | 0.35  | 1.36 | 2.81  | 1.29 | 9.50  | -0.30 | 5.47 |
| DCR21A      | 9937   | NM_010481    | 2441   | 0.75  | 0.73  | 0.70  | -0.83 | -1.11 | -0.74 | 2.20 | 1.42  | 1.74 | 2.18  | 2.68  | 5.46 |
| FHL5        | 9457   | NM_020482    | 2442   | 0.78  | 1.01  | 0.25  | -0.87 | -1.39 | -0.76 | 1.70 | 2.94  | 0.83 | 2.03  | -3.02 | 5.46 |
| Sec 06      | 23157  | NM_145802    | 2443   | 0.25  | 0.45  | -0.06 | -1.02 | -1.45 | -0.53 | 1.52 | 3.57  | 0.37 | 0.64  | -3.00 | 5.46 |
| LOC39889    | 92888  | NM_020389    | 2444   | 2.49  | 1.70  | 0.37  | -0.79 | -1.01 | -1.26 | 2.06 | 2.06  | 1.33 | 5.56  | -3.05 | 5.46 |
| TA-PP2C     | 160760 | NM_139283    | 2445   | 0.49  | 0.42  | 0.97  | -1.40 | -1.61 | -0.97 | 2.01 | 1.60  | 1.85 | 1.88  | -3.98 | 5.46 |
| DKFZP434M03 | 55592  | NM_017600    | 2446   | 1.33  | 2.14  | 0.85  | -0.29 | -0.08 | -1.05 | 1.55 | 2.50  | 1.40 | 4.32  | -1.42 | 5.46 |
| MGGP1       | 10125  | NM_005739    | 2447   | 1.04  | 0.35  | -0.48 | -1.13 | -1.00 | -0.90 | 4.30 | 1.12  | 0.04 | 0.91  | -1.24 | 5.46 |
| MOSD5       | 60492  | NM_021951    | 2448   | 3.30  | 3.65  | -0.14 | -0.08 | -0.42 | -1.01 | 2.13 | 2.69  | 0.64 | 6.81  | -1.51 | 5.46 |
| HARS1       | 23438  | NM_012208    | 2449   | 0.81  | 2.29  | 0.12  | -0.69 | -1.04 | 0.56  | 1.30 | 4.13  | 0.03 | 3.23  | -1.17 | 5.46 |
| AG2         | 10551  | NM_006408    | 2450   | 1.39  | 1.21  | 1.33  | 0.85  | -0.66 | -0.56 | 1.26 | 1.77  | 2.43 | 3.93  | -0.37 | 5.46 |
| MGC45955    | 39967  | NM_203909    | 2451   | 1.83  | 1.91  | 0.20  | -1.02 | -1.23 | -0.87 | 1.62 | 1.91  | 1.62 | 6.00  | 0.84  | 5.46 |
| DO          | 420    | NM_021071    | 2452   | 1.23  | 0.43  | 0.14  | -0.83 | -0.65 | -0.71 | 2.42 | 1.29  | 1.74 | 1.80  | -2.19 | 5.46 |
| MU1         | 10489  | NM_006369    | 2453   | 0.40  | -0.40 | 0.81  | -1.25 | -0.82 | -0.84 | 2.96 | 0.84  | 1.65 | 1.18  | -2.91 | 5.45 |
| RR          | 397    | NM_010710    | 2454   | 1.34  | 0.55  | 0.66  | -0.48 | -0.82 | -0.72 | 2.72 | 0.88  | 1.11 | 2.55  | -1.58 | 5.45 |
| MGC50104    | 341032 | NM_199498    | 2455   | 0.41  | 1.61  | 0.13  | -0.85 | -1.21 | -0.92 | 0.56 | 3.67  | 0.82 | 1.33  | -2.98 | 5.44 |
| THADA       | 63892  | NM_198554    | 2456   | 2.65  | 2.14  | 3.04  | 0.23  | 0.27  | 0.21  | 1.25 | 1.98  | 2.21 | 7.83  | 0.72  | 5.44 |
| CUGBP1      | 10658  | NM_00102596  | 2457   | -0.43 | -0.32 | -0.90 | -1.81 | -1.84 | -1.80 | 0.59 | 3.18  | 1.66 | -1.65 | -5.50 | 5.44 |
| CCOR1L28    | 14017  | NM_020528    | 2458   | 0.72  | 0.87  | 1.11  | -0.58 | -0.77 | -0.77 | 2.01 | 3.00  | 1.70 | 3.70  | 1.34  | 5.44 |
| DERA        | 51071  | NM_198554    | 2459   | 0.79  | 0.74  | 1.82  | -0.38 | -0.59 | -0.51 | 1.37 | 1.14  | 2.92 | 4.31  | -1.49 | 5.44 |
| LOC91752    | 91752  | NM_194250    | 2460   | 1.64  | 1.62  | 1.46  | -0.85 | -0.28 | -0.31 | 2.80 | 1.05  | 1.58 | 3.77  | -1.44 | 5.44 |
| TAS1L1      | 8085   | NM_172541    | 2461   | 1.20  | 1.28  | 0.62  | -1.43 | -2.10 | -2.38 | 1.43 | 2.10  | 1.62 | 10.30 | 1.73  | 5.44 |
| MRL1        | 65008  | NM_020236    | 2462   | 1.09  | 1.89  | 0.92  | -0.34 | -0.73 | -0.93 | 1.28 | 2.40  | 1.74 | 3.90  | -2.01 | 5.42 |
| CMP2        | 55748  | NM_018235    | 2463   | 2.22  | 3.51  | 1.89  | 0.21  | 0.12  | -0.57 | 1.25 | 2.33  | 1.83 | 7.62  | -0.24 | 5.42 |
| HLA1181     | 5732   | NM_041031711 | 2464   | 0.65  | 1.13  | 0.96  | -0.50 | -0.10 | -0.20 | 2.75 | 1.23  | 1.62 | 4.70  | -0.87 | 5.41 |
| FG8         | 2944   | NM_005141    | 2465   | 1.47  | 1.52  | 1.35  | -0.23 | -0.33 | 0.00  | 1.82 | 2.79  | 0.80 | 4.34  | 0.57  | 5.41 |
| CSORF84     | 158401 | NM_00108051  | 2466   | 0.00  | 0.18  | 0.07  | -0.37 | -1.11 | 0.80  | 1.18 | 0.33  | 1.19 | 0.25  | -2.28 | 5.40 |
| SYCP3       | 50511  | NM_153994    | 2467   | 0.72  | 2.44  | 0.33  | -0.83 | -0.89 | -1.44 | 1.49 | 3.21  | 0.70 | 3.48  | -1.16 | 5.40 |
| MOHLE       | 16043  | NM_181793    | 2468   | 3.66  | 2.45  | 4.49  | 0.71  | -0.43 | -0.49 | 1.34 | 1.61  | 2.40 | 8.60  | 1.03  | 5.39 |
| CKORF2      | 1527   | NM_001586    | 2469   | 0.45  | 2.41  | 2.03  | -1.40 | -0.47 | -0.29 | 2.65 | 0.34  | 2.39 | 2.65  | -2.16 | 5.39 |
| HSPAS       | 3309   | NM_005347    | 2470   | 0.32  | -0.10 | 0.56  | -1.66 | -1.31 | -0.44 | 3.26 | 1.55  | 0.58 | 0.78  | -3.40 | 5.39 |
| LOC10111    | 37575  | NM_152386    | 2471   | 1.05  | 0.15  | 0.65  | -1.14 | -1.50 | -1.15 | 1.50 | 1.15  | 1.14 | 1.14  | -3.00 | 5.39 |
| TRIM68      | 55128  | NM_018073    | 2472   | 4.66  | 10.13 | 4.28  | 0.43  | -0.10 | 1.15  | 0.00 | 4.78  | 0.60 | 19.07 | 5.67  | 5.38 |
| SRRP5       | 13725  | NM_080743    | 2473   | 1.32  | 0.63  | 0.55  | -0.93 | -1.36 | -0.48 | 1.91 | 2.18  | 1.29 | 2.49  | -2.78 | 5.38 |
| AT7B5       | 14748  | NM_016234    | 2474   | 2.14  | 1.24  | 1.25  | -0.47 | -0.44 | -0.60 | 4.40 | 1.60  | 1.40 | 4.63  | -0.46 | 5.38 |
| DOXP1       | 5717   | NM_020438    | 2475   | 0.10  | 0.09  | 1.70  | -1.70 | -0.78 | -1.38 | 0.59 | 0.80  | 4.00 | 1.88  | -3.86 | 5.38 |
| OSCR6       | 53820  | NM_018962    | 2476   | -0.20 | 0.30  | 0.98  | -0.58 | -0.69 | -0.33 | 0.52 | 2.70  | 2.16 | 0.98  | -1.60 | 5.38 |
| C12orf77    | 114903 | NM_031911    | 2477   | -0.35 | 0.10  | -0.66 | -1.80 | -1.56 | -1.79 | 3.36 | 1.20  | 0.82 | -1.00 | -5.11 | 5.37 |
| NPH4        | 11247  | NM_007224    | 2478   | 1.34  | 1.32  | 1.89  | 0.23  | 0.93  | 0.58  | 1.28 | 1.82  | 0.50 | 9.52  | 1.82  | 5.37 |
| OR8A1       | 190275 | NM_00100519  | 2479   | 0.68  | 2.52  | 1.25  | -0.90 | -0.51 | 0.09  | 2.10 | 2.52  | 0.76 | 4.46  | -1.32 | 5.37 |
| LOC401429   | 155660 | NM_001004302 | 2480   | 1.05  | 2.39  | 0.42  | -0.62 | -0.35 | -1.14 | 1.05 | 2.62  | 1.70 | 3.86  | -1.20 | 5.37 |
| GRM1        | 2911   | NM_000038    | 2481   | 0.09  | 0.19  | 0.74  | -0.21 | -1.30 | -1.07 | 1.34 | 1.24  | 1.07 | 2.80  | -2.02 | 5.37 |
| EDARRAD     | 128178 | NM_145861    | 2482   | 1.22  | 2.12  | 2.57  | 0.01  | 0.34  | -0.09 | 1.31 | 1.25  | 2.80 | 5.10  | 0.26  | 5.36 |
| SOX1        | 51540  | NM_016510    | 2483   | 1.06  | 1.79  | 0.23  | -1.05 | 1.25  | -1.05 | 2.91 | 0.33  | 2.12 | 3.08  | -0.85 | 5.36 |
| TF1D2       | 55587  | NM_0016421   | 2484   | 2.40  | 2.47  | 4.21  | -0.40 | -0.88 | -0.77 | 2.01 | 1.47  | 1.22 | 5.08  | -2.56 | 5.36 |
| SMO         | 6608   | NM_005631    | 2485   | -0.81 | 0.15  | 0.90  | -1.89 | -2.13 | -1.58 | 0.75 | 3.69  | 0.92 | 1.56  | -5.60 | 5.36 |
| FLJ12125    | 79680  | NM_024627    | 2486   | 1.83  | 2.45  | 1.19  | -0.62 | -0.08 | -0.54 | 2.16 | 2.21  | 0.99 | 5.47  | -1.25 | 5.36 |
| TFP2        | 64591  | NM_022573    | 2487   | 0.32  | 0.86  | 0.68  | -1.53 | -1.22 | -0.38 | 1.98 | 2.31  | 1.08 | 1.85  | -1.13 | 5.36 |
| RYR1L       | 37807  | NM_001006317 | 2488   | 3.98  | 1.11  | 0.66  | -1.12 | -1.32 | -0.72 | 1.56 | 1.11  | 0.62 | 5.75  | 2.25  | 5.36 |
| STGALNACS   | 81849  | NM_030965    | 2489   | 0.82  | 1.17  | 0.07  | -0.59 | -1.30 | -0.82 | 1.12 | 3.21  | 1.01 | 2.06  | -2.71 | 5.35 |
| ASB14       | 142886 | NM_130387    | 2490   | -1.07 | -0.67 | -0.53 | -2.01 | -2.40 | -2.23 | 0.78 | 2.36  | 2.20 | -2.27 | -6.64 | 5.35 |
| 130         | 100163 | NM_005178    | 2491   | 0.63  | 0.07  | 0.11  | -1.04 | -1.19 | -1.19 | 2.53 | 1.29  | 0.59 | 0.97  | -4.27 | 5.34 |
| BCL3        | 602    | NM_005178    | 2492   | 0.82  | 0.16  | 0.21  | -1.46 | -1.34 | -0.53 | 2.41 | 2.40  | 0.54 | 1.19  | -2.28 | 5.34 |
| IL2RA       | 9466   | NM_004843    | 2493   | 1.70  | 0.63  | 2.41  | 0.23  | 0.14  | 0.08  | 2.45 | 0.39  | 2.50 | 4.73  | 0.45  | 5.34 |
| TUBB4       | 84796  | NM_0024704   | 2494   | 0.51  | 0.72  | 0.26  | -0.84 | -0.57 | -0.94 | 1.63 | 2.06  | 1.07 | 0.60  | -0.42 | 5.34 |
| GRPR        | 2925   | NM_005314    | 2495   | -0.03 | -1.00 | -0.69 | 0.35  | -0.26 | -0.48 | 3.53 | -0.37 | 2.18 | -1.73 | 0.57  | 5.34 |
| PKC2        | 8440   | NM_01004722  | 2496   | 0.98  | 2.21  | 1.34  | -0.71 | -0.76 | -1.10 | 1.23 | 2.07  | 2.03 | 4.63  | -2.58 | 5.34 |
| NXN1        | 53373  | NM_017101    | 2497   | 4.57  | 2.34  | 2.59  | 0.16  | -0.06 | -0.44 | 2.66 | 1.38  | 1.30 | 9.40  | 0.54  | 5.34 |
| CCDC203677  | 28307  | NM_001004267 | 2498   | 1.05  | 1.28  | 1.17  | -1.04 | -0.42 | -0.80 | 1.43 | 0.42  | 3.80 | 4.49  | -2.11 | 5.34 |
| PSMD10      | 5716   | NM_170750    | 2499   | 2.09  | 1.80  | 2.10  | 0.83  | 0.68  | 0.01  | 1.92 | 1.68  | 1.73 | 5.99  | 1.50  | 5.33 |
| MURTS       | 4302   | NM_005937    | 2500   | 0.65  | -0.39 | 0.93  | -1.03 | -0.70 | -1.08 | 2.46 | 0.45  | 2.42 | 1.18  | -2.81 | 5.33 |
| HLR1        | 22082  | NM_016719    | 2501   | 1.32  | 1.19  | 1.02  | -1.19 | -1.32 | -1.65 | 1.29 | 1.62  | 1.10 | 0.30  | -3.52 | 5.33 |
| FLJ32011    | 148930 | NM_001097611 | 2502   | -0.69 | -0.08 | 0.25  | -1.65 | -1.81 | -1.57 | 1.08 | 1.77  | 2.48 | 0.52  | -5.03 | 5.33 |
| EP8L3       | 79574  | NM_024626    | 2503</ |       |       |       |       |       |       |      |       |      |       |       |      |



|             |        |               |      |       |       |       |       |       |       |       |       |       |       |       |       |
|-------------|--------|---------------|------|-------|-------|-------|-------|-------|-------|-------|-------|-------|-------|-------|-------|
| RORC        | 6097   | NMC_001001523 | 2585 | -4.96 | -0.71 | 0.02  | -1.87 | -1.65 | -1.19 | 1.55  | 1.09  | 2.56  | -1.65 | -4.71 | 5.20  |
| MMRPA1      | 5596   | NMC_001001523 | 2586 | -0.66 | 2.19  | 1.82  | -0.10 | -0.95 | -0.40 | 1.32  | 2.18  | 2.84  | -1.87 | -5.84 | -1.17 |
| CND33       | 896    | NMC_0017060   | 2587 | 1.50  | 0.05  | 4.37  | 0.51  | 1.65  | 0.49  | 0.95  | 1.14  | 3.10  | 7.92  | 2.65  | 5.20  |
| IDH3B       | 3420   | NMC_174855    | 2588 | -0.43 | 0.01  | 0.33  | -1.11 | -1.03 | -1.93 | 0.45  | 0.76  | 3.99  | -0.10 | -4.07 | 5.20  |
| ARHG08B     | 897    | NMC_001175    | 2589 | 1.36  | 3.45  | 0.75  | 0.14  | -0.22 | 0.00  | 0.79  | 3.97  | 0.43  | 5.55  | -0.07 | 5.20  |
| SUSGA2      | 650    | NMC_001175    | 2590 | 0.35  | 2.26  | 1.11  | 0.21  | 2.09  | 2.11  | 2.09  | 3.04  | 1.91  | 3.73  | 7.51  | 5.19  |
| DKFZ5868162 | 26007  | NMC_0151533   | 2591 | 0.40  | 0.34  | 0.49  | -1.49 | -1.01 | -1.08 | 2.10  | 1.53  | 1.56  | 1.23  | -1.93 | 5.19  |
| WN72        | 7472   | NMC_003191    | 2592 | 1.13  | 3.36  | 1.64  | -0.16 | 0.24  | -0.65 | 1.93  | 1.87  | 1.39  | 6.13  | -0.57 | 5.19  |
| ICCH99      | 8428   | NMC_001131036 | 2593 | 0.49  | 1.71  | 1.89  | -0.11 | 0.44  | -0.01 | 0.65  | 1.61  | 1.61  | 2.11  | -1.07 | 5.19  |
| REG18       | 5968   | NMC_006507    | 2594 | 1.90  | 2.18  | 0.91  | -0.20 | -0.02 | 0.22  | 2.20  | 2.64  | 0.35  | 4.99  | 0.01  | 5.19  |
| DM3         | 5434   | NMC_153741    | 2595 | 0.65  | 1.48  | 0.34  | -1.20 | -0.70 | -0.90 | 1.29  | 1.75  | 2.14  | 2.47  | -2.86 | 5.18  |
| GNP2        | 170825 | NMC_0012607   | 2596 | 1.67  | 0.02  | -0.17 | -1.19 | -1.40 | -1.69 | 1.57  | 1.60  | 1.60  | 1.42  | -1.11 | 5.18  |
| FLI23467    | 7926   | NMC_024575    | 2597 | 1.19  | 0.54  | 1.74  | -0.48 | -0.39 | -0.47 | 1.97  | 0.99  | 2.22  | 3.47  | -1.33 | 5.18  |
| LOC144100   | 14730  | NMC_175058    | 2598 | 0.04  | -0.03 | -0.21 | -1.17 | -1.14 | -1.14 | 2.28  | 1.70  | 1.19  | -0.20 | -4.04 | 5.18  |
| GSDM        | 284130 | NMC_178171    | 2599 | 1.49  | 0.66  | 0.69  | -0.67 | -0.54 | -0.57 | 2.18  | 1.72  | 1.28  | 2.84  | -1.78 | 5.18  |
| IGF4        | 4082   | NMC_002347    | 2600 | 1.38  | 1.04  | 1.13  | -0.79 | -0.54 | -1.10 | 1.75  | 1.24  | 2.18  | 3.55  | -0.52 | 5.17  |
| PSMA1       | 5682   | NMC_002786    | 2601 | -0.36 | -1.38 | -0.99 | -2.59 | -2.72 | -2.27 | 4.09  | -0.15 | 1.24  | -2.73 | -7.59 | 5.17  |
| RFX         | 55312  | NMC_018139    | 2602 | 0.69  | 0.57  | 0.15  | -1.39 | -1.10 | -1.05 | 2.60  | 1.58  | 1.00  | 1.40  | -3.54 | 5.17  |
| LOC553214   | 653234 | NMC_001089544 | 2603 | -1.29 | -1.73 | -0.54 | -2.48 | -2.74 | -2.62 | 1.66  | -0.00 | 2.53  | -3.57 | 8.85  | 5.17  |
| C20ORF26    | 26074  | NMC_015585    | 2604 | 0.10  | 0.60  | 0.52  | -1.51 | -1.42 | -1.56 | 0.89  | 1.38  | 2.90  | 1.22  | -4.49 | 5.17  |
| SE78        | 387893 | NMC_020382    | 2605 | 1.82  | 0.59  | -0.14 | -0.84 | -0.18 | -0.23 | 3.17  | 1.05  | 0.95  | 2.28  | -1.25 | 5.17  |
| WHP1        | 11058  | NMC_007013    | 2606 | 1.27  | 1.33  | 2.07  | -0.12 | -0.04 | -0.04 | 1.09  | 1.10  | 2.98  | 4.67  | -0.84 | 5.16  |
| RCN2        | 5955   | NMC_002902    | 2607 | 0.05  | 0.51  | 0.54  | -1.19 | -0.53 | -0.81 | 2.31  | 1.60  | 1.26  | 1.10  | -2.54 | 5.16  |
| TFPC2       | 7024   | NMC_005653    | 2608 | 1.54  | 0.82  | 0.92  | -1.69 | -0.43 | 0.91  | 3.51  | 1.22  | 0.43  | 3.28  | -1.20 | 5.16  |
| MAN1A1      | 4121   | NMC_005907    | 2609 | 1.59  | 1.95  | 1.12  | -0.90 | -0.60 | -0.12 | 2.00  | 2.33  | 0.84  | 4.66  | -1.62 | 5.16  |
| GRIN2B      | 2904   | NMC_000834    | 2610 | 1.83  | 1.80  | 0.93  | -0.59 | 0.05  | -0.12 | 2.16  | 1.78  | 1.22  | 4.22  | -0.67 | 5.16  |
| MFN2        | 9927   | NMC_014874    | 2611 | -0.20 | 0.54  | 1.32  | 0.81  | -0.41 | -0.98 | 0.01  | 2.59  | 2.56  | 1.66  | -0.58 | 5.16  |
| DLC2        | 140735 | NMC_080677    | 2612 | 0.40  | 2.19  | -0.07 | -0.05 | 0.05  | 0.99  | 0.49  | 4.38  | 0.30  | 2.26  | 0.99  | 5.16  |
| WIP1        | 254873 | NMC_00060656  | 2613 | 1.76  | 1.66  | 1.09  | -0.77 | -0.02 | -0.02 | 1.66  | 1.66  | 1.66  | 7.51  | 0.13  | 5.16  |
| NIN3A       | 57902  | NMC_181332    | 2614 | 0.19  | -0.59 | -0.26 | -1.47 | -1.39 | -1.37 | 0.21  | 0.72  | 2.12  | -0.66 | -4.23 | 5.16  |
| CTAGE4      | 16408  | NMC_198495    | 2615 | 1.22  | 0.52  | 0.39  | -0.60 | -0.95 | -0.54 | 2.75  | 1.50  | 0.91  | 3.03  | -2.09 | 5.16  |
| MGC19931    | 404840 | NMC_00104033  | 2616 | 2.23  | 2.08  | 1.01  | -1.83 | -2.08 | -1.83 | 2.08  | 1.01  | 1.01  | 4.92  | -2.76 | 5.15  |
| FOXK2       | 55810  | NMC_018416    | 2617 | 2.15  | 1.93  | -0.83 | -0.82 | -0.91 | -1.52 | 1.57  | 2.43  | 1.15  | 2.36  | -1.15 | 5.15  |
| HIST1H2AM   | 8336   | NMC_003514    | 2618 | 0.24  | 0.71  | 0.83  | -1.56 | -0.89 | -1.11 | 2.18  | 1.35  | 1.61  | 1.78  | -3.55 | 5.15  |
| DKFZ5864202 | 25963  | NMC_001110003 | 2619 | 1.73  | 3.20  | 1.59  | 0.98  | 0.01  | -0.29 | 0.72  | 2.25  | 2.19  | 6.52  | 0.70  | 5.15  |
| CCZ41       | 996    | NMC_005947    | 2620 | -0.18 | 0.49  | 0.94  | -0.29 | -0.02 | -0.15 | 0.49  | 0.97  | 3.81  | 0.63  | -0.24 | 5.15  |
| SMC1L2      | 27127  | NMC_148674    | 2621 | 3.27  | 1.99  | 2.08  | 0.03  | -0.39 | 0.29  | 1.67  | 2.66  | 0.81  | 7.33  | -0.07 | 5.14  |
| FUT2        | 2524   | NMC_000511    | 2622 | 0.96  | 1.17  | 0.72  | -1.49 | -0.50 | -0.93 | 2.55  | 2.24  | 1.35  | 2.85  | -2.92 | 5.14  |
| WASF1       | 8936   | NMC_00218036  | 2623 | 1.45  | 1.65  | 0.65  | 0.71  | 1.67  | 0.65  | 1.45  | 1.65  | 0.65  | 7.80  | 0.78  | 5.14  |
| SP4         | 6671   | NMC_003112    | 2624 | 1.54  | 0.89  | 0.64  | -1.66 | -0.05 | 0.55  | 2.74  | 1.86  | 0.53  | 3.07  | 0.34  | 5.13  |
| USF-116K0   | 9343   | NMC_004247    | 2625 | -0.61 | -0.32 | -1.70 | -2.27 | -2.00 | -2.44 | 1.53  | 2.72  | 0.87  | -2.63 | -6.72 | 5.12  |
| IGFBP4      | 1395   | NMC_001414    | 2626 | 1.54  | 1.77  | 1.47  | -0.12 | -0.69 | -0.12 | 1.54  | 1.69  | 2.17  | 4.77  | -1.38 | 5.12  |
| PSORS1C1    | 17079  | NMC_014068    | 2627 | 1.02  | 0.58  | 1.31  | -0.66 | -0.69 | -1.08 | 1.01  | 1.98  | 2.13  | 2.80  | -2.43 | 5.12  |
| RASSF1      | 11186  | NMC_170712    | 2628 | 1.83  | 0.36  | 1.18  | -0.49 | -0.07 | 0.58  | 4.16  | 0.43  | 0.53  | 3.37  | 0.02  | 5.12  |
| IT2P26      | 10172  | NMC_005773    | 2629 | -1.14 | -0.48 | 0.40  | -1.74 | -2.15 | -1.15 | -0.04 | 4.10  | 1.06  | -1.22 | -5.04 | 5.12  |
| IGFBP3      | 13543  | NMC_148959    | 2630 | 1.05  | 1.05  | 1.31  | -0.79 | -0.36 | 0.02  | 3.63  | 0.02  | 1.44  | 3.23  | -1.48 | 5.12  |
| RARS        | 57038  | NMC_020320    | 2631 | 1.59  | 0.76  | 1.32  | -0.02 | -0.42 | -0.57 | 1.65  | 1.46  | 2.00  | 3.67  | -1.00 | 5.11  |
| ZMYM1       | 79830  | NMC_024772    | 2632 | 2.21  | 2.31  | 3.27  | 0.67  | -0.03 | -0.09 | 0.94  | 1.76  | 2.41  | 7.80  | 0.55  | 5.11  |
| TRAF1       | 7965   | NMC_002608    | 2633 | 0.96  | 1.17  | 1.47  | -0.66 | -0.17 | -0.17 | 1.56  | 1.56  | 1.56  | 12.77 | 2.16  | 5.11  |
| TAZ         | 6901   | NMC_181313    | 2634 | 2.20  | -0.14 | 1.57  | -0.13 | 1.36  | -0.11 | 2.88  | 0.52  | 1.71  | 3.62  | 1.12  | 5.10  |
| CRP1        | 147    | NMC_170609    | 2635 | 1.63  | 0.24  | 1.51  | -1.05 | -1.46 | -0.69 | 2.66  | 0.63  | 1.81  | 3.10  | -3.20 | 5.10  |
| PPF19D      | 5514   | NMC_002714    | 2636 | 0.22  | 0.32  | 0.29  | -0.39 | -0.20 | -0.39 | 1.08  | 2.32  | 1.67  | 7.73  | -0.47 | 5.10  |
| MSC4206     | 84766  | NMC_026860    | 2637 | 1.30  | 0.82  | 0.88  | -0.67 | -0.52 | -1.20 | 1.67  | 0.88  | 2.55  | 3.10  | -2.39 | 5.10  |
| NPR1        | 4867   | NMC_207181    | 2638 | 0.53  | 0.29  | -0.21 | -1.28 | -1.02 | -0.60 | 2.70  | 2.01  | 0.39  | 0.61  | -2.91 | 5.09  |
| PPF21B      | 5519   | NMC_181699    | 2639 | 2.13  | 1.92  | 1.88  | -0.31 | 0.19  | 1.15  | 2.14  | 1.73  | 1.22  | 5.93  | 1.03  | 5.09  |
| TR1         | 213    | NMC_024034    | 2640 | 0.93  | 0.10  | 1.56  | -0.17 | 1.05  | -0.17 | 1.44  | 1.04  | 2.66  | 6.40  | 0.19  | 5.09  |
| PARR6       | 56965  | NMC_020214    | 2641 | -0.22 | 0.62  | 1.18  | -0.96 | -1.29 | -0.20 | 1.04  | 3.96  | 0.09  | 0.22  | -2.55 | 5.09  |
| OMP         | 4975   | NMC_006189    | 2642 | -0.25 | 0.11  | 1.73  | -0.28 | -0.44 | -0.71 | -0.20 | 1.67  | 3.62  | 2.29  | -0.87 | 5.08  |
| H1G4G12     | 411    | NMC_001367    | 2643 | -0.22 | 0.69  | 1.30  | -0.49 | -0.42 | -0.69 | 0.77  | 3.09  | 0.92  | 4.61  | -0.79 | 5.08  |
| FXYD7       | 58322  | NMC_022006    | 2644 | 0.66  | 1.76  | 0.97  | -0.39 | 0.52  | 0.53  | 1.69  | 1.50  | 1.89  | 3.39  | 0.66  | 5.08  |
| OKT3        | 390154 | NMC_00104747  | 2645 | -1.05 | -0.06 | 0.41  | -1.21 | -1.27 | -1.14 | 2.72  | 1.07  | 1.29  | 1.41  | -3.62 | 5.08  |
| SNRNP       | 90307  | NMC_071491    | 2646 | 0.18  | -0.24 | -0.15 | -1.50 | -0.23 | -0.24 | 4.51  | 0.40  | 0.11  | -0.20 | -4.97 | 5.08  |
| DOCK1       | 1793   | NMC_001380    | 2647 | 0.00  | 0.27  | 1.27  | -1.10 | -1.15 | -0.02 | 1.65  | 1.41  | 2.02  | 1.54  | -1.27 | 5.08  |
| NUDC        | 10726  | NMC_006600    | 2648 | 1.19  | 0.70  | 0.53  | -0.68 | -0.75 | -0.59 | 1.40  | 2.29  | 1.38  | 2.42  | -2.02 | 5.08  |
| GC          | 2638   | NMC_000583    | 2649 | 1.21  | 0.67  | 1.43  | -0.00 | -0.46 | -0.74 | 0.94  | 1.30  | 2.83  | 3.30  | -1.21 | 5.07  |
| IGF2L1      | 7782   | NMC_012520    | 2650 | 0.49  | 0.71  | 1.88  | -0.86 | -2.43 | 0.86  | 2.43  | 0.86  | 2.43  | 2.80  | -0.60 | 5.07  |
| LOC124245   | 124245 | NMC_144604    | 2651 | 1.89  | 0.56  | 1.19  | -0.66 | -0.98 | -1.22 | 2.43  | 1.08  | 1.57  | 3.64  | -2.86 | 5.07  |
| GALGT2      | 124872 | NMC_153446    | 2652 | 1.50  | 2.03  | 2.21  | -0.42 | -0.58 | -0.41 | 1.30  | 2.05  | 1.72  | 5.75  | -1.41 | 5.07  |
| TRAF2       | 8937   | NMC_000429    | 2653 | 0.26  | 0.54  | 0.26  | -0.57 | -0.62 | -0.83 | 1.57  | 0.62  | 1.54  | 3.73  | -0.41 | 5.07  |
| BARX2       | 8538   | NMC_003658    | 2654 | 1.18  | 1.76  | 1.03  | -0.48 | -0.64 | -0.39 | 1.15  | 3.14  | 0.78  | 3.97  | -1.51 | 5.07  |
| GPR41       | 2865   | NMC_005304    | 2655 | 0.54  | 1.22  | 0.88  | -0.75 | -0.74 | -1.29 | 0.72  | 1.84  | 2.51  | 2.64  | -2.78 | 5.06  |
| TFPI2       | 8950   | NMC_001430    | 2656 | 1.44  | 1.77  | 1.43  | -0.77 | -1.44 | -1.17 | 1.75  | 2.07  | 1.43  | 3.54  | -2.27 | 5.06  |
| RLN3        | 117579 | NMC_080864    | 2657 | -0.95 | -0.03 | 1.48  | -0.44 | -0.32 | -1.13 | 0.73  | 0.54  | 5.24  | 0.50  | -1.89 | 5.06  |
| SH3YL1      | 26751  | NMC_015677    | 2658 | -1.04 | 1.54  | 0.93  | -0.65 | 0.27  | 0.01  | 0.21  | 2.98  | 1.86  | 2.43  | -0.39 | 5.06  |
| GNAS        | 2778   | NMC_080426    | 2659 | -0.77 | 0.88  | 2.20  | 0.00  | -0.22 | -0.39 | 1.70  | 2.42  | 0.93  | 6.85  | 0.18  | 5.06  |
| FLI11838    | 7917   | NMC_024664    | 2660 | 0.29  | 0.78  | 1.33  | -0.18 | -0.12 | -0.18 | 2.24  | 0.89  | 2.16  | 4.39  | -0.12 | 5.06  |
| ZNF71       | 58491  | NMC_021216    | 2661 | -0.80 | -0.66 | 0.07  | -1.91 | -2.18 | -1.61 | 1.23  | 2.02  | 1.80  | -1.18 | -3.70 | 5.06  |
| TMEM29      | 29057  | NMC_014138    | 2662 | 0.86  | 1.83  | 0.86  | -1.13 | -1.43 | 0.34  | 1.92  | 2.16  | 0.96  | 3.56  | -2.22 | 5.06  |
| FAM151A     | 5457   | NMC_019654    | 2663 | 0.96  | 0.55  | 1.50  | -0.66 | -0.65 | -1.03 | 1.81  | 1.29  | 1.62  | 4.80  | -1.51 | 5.05  |
| TXND93      | 10190  | NMC_005783    | 2664 | -0.18 | 0.54  | -0.30 | -1.14 | -1.50 | -0.80 | 0.19  | 4.95  | -0.09 | 0.60  | -3.44 | 5.05  |
| LOC931723   | 391723 | NMC_00102887  | 2665 | 3.09  |       |       |       |       |       |       |       |       |       |       |       |

|            |        |              |      |       |       |       |       |       |       |       |       |       |       |       |      |
|------------|--------|--------------|------|-------|-------|-------|-------|-------|-------|-------|-------|-------|-------|-------|------|
| USP16      | 10600  | NM_01001992  | 2747 | 2.00  | 0.42  | 1.47  | -0.38 | -0.48 | -0.05 | 2.68  | 1.12  | 1.07  | 3.89  | -0.90 | 4.87 |
| SEIFA1     | 2880   | NM_016421    | 2748 | 1.61  | 1.61  | 0.53  | -0.02 | -0.54 | -0.11 | 2.29  | 2.11  | 1.41  | 3.75  | -1.52 | 4.91 |
| PPG        | 9360   | NM_004792    | 2750 | 0.49  | 0.23  | 0.35  | -1.44 | -1.41 | -1.40 | 2.03  | 1.05  | 1.79  | 1.07  | -4.25 | 4.86 |
| FLJ38426   | 283742 | NM_001042429 | 2750 | -0.41 | 1.68  | 2.13  | -0.35 | -0.36 | -0.78 | 0.15  | 1.28  | 3.42  | 3.39  | -1.50 | 4.86 |
| LOC232929  | 220929 | NM_182755    | 2751 | 0.42  | -0.37 | 0.08  | -1.12 | -0.77 | -0.99 | 2.46  | 0.00  | 2.40  | 0.12  | -2.86 | 4.85 |
| CWC92      | 891    | NM_003936    | 2752 | 1.59  | 1.63  | 1.86  | -0.32 | -0.32 | -0.32 | 1.32  | 2.63  | 1.83  | 6.08  | -0.10 | 4.85 |
| LOC352909  | 352909 | NM_178837    | 2753 | 0.73  | 4.09  | 2.66  | 0.25  | 0.18  | -0.30 | 2.07  | 1.41  | 1.37  | 10.48 | 0.14  | 4.85 |
| QKZP284606 | 91584  | NM_181775    | 2754 | 0.33  | 1.03  | 0.72  | -0.84 | -0.55 | -0.49 | 1.00  | 1.94  | 1.91  | 2.07  | -1.87 | 4.85 |
| NM15       | 14610  | NM_170937    | 2755 | 1.39  | 1.46  | 1.61  | -0.16 | -0.16 | -0.16 | 1.39  | 1.46  | 1.61  | 0.81  | 1.90  | 4.85 |
| FLJ35156   | 119321 | NM_152423    | 2756 | 2.33  | 2.12  | 0.34  | 0.91  | 0.37  | -0.63 | 1.49  | 2.97  | 0.39  | 4.79  | 0.64  | 4.85 |
| WNKA       | 65266  | NM_032387    | 2757 | 2.12  | 2.55  | 0.97  | 0.83  | 0.50  | 0.64  | 2.00  | 1.82  | 1.01  | 5.65  | 1.97  | 4.84 |
| MMRP       | 4074   | NM_032355    | 2758 | 4.06  | 4.23  | 2.25  | -1.59 | -2.42 | -0.53 | 1.59  | 2.42  | 0.53  | 2.55  | -2.52 | 4.84 |
| DEFB1211   | 245934 | NM_001011878 | 2759 | 1.76  | 1.75  | 0.83  | -0.18 | -0.56 | -0.64 | 1.66  | 2.32  | 0.86  | 5.44  | -1.38 | 4.84 |
| DEPD06     | 64798  | NM_022783    | 2760 | 2.99  | 1.79  | 0.89  | -0.02 | -0.04 | 0.09  | 3.11  | 1.29  | 0.45  | 5.67  | 0.04  | 4.84 |
| DPF7       | 29952  | NM_013179    | 2761 | 0.48  | -0.26 | 1.08  | 0.70  | 0.28  | -0.94 | 0.54  | 0.28  | 4.02  | 1.29  | 0.03  | 4.84 |
| FLJ18560   | 7951   | NM_002450    | 2762 | 1.20  | 0.77  | 1.28  | -0.77 | -0.59 | -0.36 | 2.33  | 1.33  | 1.88  | 3.25  | -1.72 | 4.84 |
| KMAA1171   | 57465  | NM_020705    | 2763 | 0.77  | -0.44 | -0.49 | -1.82 | -1.33 | -1.23 | 3.19  | 0.82  | 0.83  | -0.15 | -4.38 | 4.84 |
| FLJ7RE     | 132014 | NM_153941    | 2764 | -0.56 | 0.08  | -0.73 | -1.64 | -2.23 | -1.21 | 0.75  | 3.35  | 0.74  | -1.22 | -5.08 | 4.84 |
| FLJ23279   | 440232 | NM_001012452 | 2765 | 3.08  | 1.91  | 1.08  | -0.39 | -0.32 | -0.42 | 2.33  | 1.57  | 0.53  | 6.08  | -1.12 | 4.83 |
| KMA0759    | 23357  | NM_015305    | 2766 | -0.34 | 0.66  | 0.56  | -0.08 | -1.07 | -0.66 | 0.03  | 2.45  | 2.35  | 0.88  | -1.81 | 4.83 |
| FLJ40296   | 122183 | NM_198441    | 2767 | 0.34  | 0.82  | 0.49  | -0.05 | 0.00  | -1.23 | 1.01  | 1.32  | 2.50  | 1.65  | -1.28 | 4.83 |
| MBP1       | 1165   | NM_0011229   | 2768 | -0.24 | -0.33 | -0.25 | -1.80 | -0.25 | -0.72 | 3.59  | 0.26  | 0.98  | -0.82 | -2.77 | 4.83 |
| GOLPH3L    | 55204  | NM_018178    | 2769 | 2.58  | 0.91  | 0.16  | -0.54 | -0.65 | -0.95 | 2.60  | 1.63  | 0.60  | 3.65  | -2.14 | 4.83 |
| FLJ14904   | 84944  | NM_032858    | 2770 | 0.40  | 0.93  | 1.97  | -0.12 | -1.40 | 0.41  | 0.48  | 3.41  | 0.93  | 3.30  | -1.11 | 4.83 |
| KHL6       | 89857  | NM_130446    | 2771 | 2.07  | 1.39  | 1.55  | -0.06 | 0.07  | -0.15 | 2.34  | 1.38  | 1.11  | 5.01  | -0.14 | 4.83 |
| FLJ37495   | 163115 | NM_152005    | 2772 | 1.75  | 2.17  | 0.51  | -0.76 | 0.30  | -0.20 | 2.00  | 2.13  | 0.69  | 4.44  | -0.25 | 4.83 |
| SHCBP1     | 79801  | NM_024745    | 2773 | 2.12  | 2.03  | 1.25  | -0.08 | 0.44  | -0.33 | 2.29  | 1.30  | 1.24  | 5.40  | 0.23  | 4.82 |
| UPK2       | 7379   | NM_006760    | 2774 | 1.99  | 1.24  | 1.63  | -0.68 | -0.66 | -0.76 | 1.21  | 1.60  | 2.01  | 4.87  | -2.11 | 4.82 |
| PSPH       | 573    | NM_024577    | 2775 | 0.68  | 0.36  | 1.09  | -1.00 | -1.00 | -1.00 | 1.29  | 1.00  | 1.77  | 0.22  | -0.22 | 4.82 |
| FLJ10880   | 56204  | NM_019600    | 2776 | 1.57  | 2.86  | 1.86  | -0.46 | -0.73 | -0.82 | 0.30  | 1.78  | 2.74  | 6.29  | -1.09 | 4.82 |
| ODC-P      | 113451 | NM_052998    | 2777 | 1.77  | 1.06  | 1.06  | -0.59 | -0.94 | -0.84 | 1.70  | 1.57  | 1.55  | 3.90  | -2.37 | 4.81 |
| FLJ14753   | 8454   | NM_032558    | 2778 | 2.00  | 0.29  | 0.29  | -1.13 | -0.89 | -0.89 | 1.43  | 0.29  | 0.29  | -0.43 | -2.82 | 4.81 |
| FLJ4691    | 345193 | NM_198506    | 2779 | 0.81  | 1.68  | 0.62  | -0.82 | -0.28 | -0.55 | 1.14  | 1.48  | 2.19  | 3.11  | 1.64  | 4.81 |
| KRTAP18-11 | 386678 | NM_198692    | 2780 | 3.61  | 3.07  | 3.83  | 0.18  | 0.15  | 0.70  | 1.57  | 1.37  | 1.86  | 10.51 | 0.84  | 4.80 |
| ANR61      | 54407  | NM_177955    | 2781 | 1.88  | 1.20  | 0.86  | -0.47 | -0.84 | -0.70 | 2.21  | 1.26  | 1.33  | 3.94  | -2.01 | 4.80 |
| ICR1       | 883    | NM_004059    | 2782 | 0.37  | 1.34  | 2.20  | -0.63 | -1.34 | 0.34  | 1.17  | 0.64  | 1.17  | 3.91  | 1.94  | 4.80 |
| LOC388381  | 388381 | NM_001080465 | 2783 | 2.10  | 0.88  | 0.12  | -0.99 | -0.71 | -1.05 | 3.32  | 0.61  | 0.87  | 3.09  | -2.76 | 4.80 |
| OKSAP2     | 338675 | NM_01020925  | 2784 | 0.70  | -0.11 | 0.61  | -0.41 | -0.48 | -0.12 | 2.74  | 1.02  | 1.04  | 1.19  | -1.01 | 4.80 |
| FLJ10      | 25798  | NM_015979    | 2785 | 1.16  | 1.21  | 1.56  | -1.09 | -1.21 | -1.09 | 1.62  | 1.21  | 1.56  | 3.22  | -1.49 | 4.79 |
| SEPH51     | 22929  | NM_012247    | 2786 | 1.80  | 2.82  | 2.78  | 0.01  | -0.10 | 0.54  | 1.58  | 1.78  | 1.43  | 7.39  | 0.45  | 4.79 |
| MG27466    | 127296 | NM_152373    | 2787 | 1.91  | 1.58  | 1.21  | -0.76 | -0.29 | -1.00 | 2.81  | 1.02  | 0.95  | 4.70  | -1.15 | 4.79 |
| SFRK       | 6425   | NM_032315    | 2788 | 0.70  | 0.88  | 1.04  | -0.78 | -1.00 | -0.78 | 1.67  | 1.78  | 1.65  | 1.67  | -1.86 | 4.79 |
| MG4618     | 84286  | NM_032326    | 2789 | 0.11  | 1.29  | 1.35  | -0.34 | -1.44 | -0.68 | 1.39  | 1.75  | 1.65  | 4.74  | -0.42 | 4.78 |
| C190R6E    | 91304  | NM_033420    | 2790 | -0.11 | 1.45  | 0.72  | -1.13 | -0.72 | -0.94 | 0.96  | 2.32  | 1.50  | 2.06  | -2.79 | 4.78 |
| FACR3      | 6870   | NM_001059    | 2791 | 1.72  | 2.05  | 0.58  | 0.00  | -0.13 | -0.69 | 1.61  | 1.65  | 1.51  | 4.35  | -0.82 | 4.78 |
| SAP90      | 8919   | NM_008964    | 2792 | 0.47  | 1.70  | 2.41  | -0.71 | -1.77 | -0.71 | 0.73  | 3.17  | 0.74  | 7.64  | -1.69 | 4.78 |
| PP356      | 93100  | NM_145201    | 2793 | 0.03  | 4.66  | -0.98 | 0.08  | -0.16 | -1.36 | -0.08 | 4.65  | 2.00  | 3.71  | -1.44 | 4.78 |
| LOC120526  | 120526 | NM_181706    | 2794 | -0.11 | 1.20  | -0.08 | -0.65 | -1.10 | -0.69 | 0.01  | 3.46  | 1.30  | 1.02  | -2.70 | 4.77 |
| LOC120521  | 29959  | NM_015711    | 2795 | 1.09  | 2.95  | 1.48  | -1.52 | -1.48 | -1.52 | 1.48  | 2.95  | 1.48  | 1.02  | -0.22 | 4.77 |
| DNIA12     | 10294  | NM_005880    | 2796 | 2.05  | 1.60  | 0.22  | -0.71 | -0.72 | -0.69 | 2.17  | 1.92  | 0.67  | 3.87  | -2.12 | 4.77 |
| MG35154    | 165100 | NM_152614    | 2797 | 1.28  | 0.26  | 0.74  | 1.10  | -0.37 | 1.14  | 1.98  | 1.42  | 1.37  | 2.28  | 1.87  | 4.77 |
| FT20M1     | 959    | NM_032685    | 2798 | 1.00  | 1.73  | 0.48  | -0.17 | -1.57 | -0.75 | 1.83  | 1.57  | 1.83  | 3.32  | -1.78 | 4.77 |
| LJMD1      | 8994   | NM_014240    | 2799 | 2.07  | 1.12  | 1.09  | -0.54 | -0.47 | -0.40 | 2.70  | 2.04  | 1.33  | 4.28  | -0.87 | 4.77 |
| ACADS      | 35     | NM_000017    | 2800 | 0.70  | -0.06 | -0.08 | -0.88 | -0.82 | -0.84 | 2.67  | 1.11  | 0.98  | 5.56  | -2.64 | 4.76 |
| FZB2       | 8323   | NM_003506    | 2801 | 2.30  | 0.62  | 0.92  | -0.86 | -0.67 | -0.20 | 1.98  | 1.59  | 1.19  | 3.84  | -0.51 | 4.76 |
| ZBTB10     | 6586   | NM_020929    | 2802 | 0.40  | 1.13  | 0.98  | -0.46 | -1.00 | -0.29 | 1.05  | 0.22  | 0.97  | 8.21  | -2.15 | 4.76 |
| NDST1      | 3340   | NM_001543    | 2803 | 2.60  | 1.94  | 2.03  | -0.23 | 0.60  | -0.14 | 1.87  | 1.10  | 1.79  | 6.57  | 0.68  | 4.76 |
| SGEF       | 26984  | NM_015995    | 2804 | -0.38 | 0.15  | 0.30  | -1.35 | -2.01 | -1.24 | 0.61  | 3.13  | 1.02  | 1.07  | -4.61 | 4.76 |
| LOC120526  | 112956 | NM_001010554 | 2805 | 1.25  | 0.68  | 1.82  | -0.67 | -1.43 | -0.67 | 1.43  | 2.02  | 1.07  | 1.62  | -2.05 | 4.76 |
| DMPK       | 1760   | NM_004409    | 2806 | -0.35 | 1.00  | 3.36  | 0.62  | 0.80  | 2.79  | 0.29  | 1.81  | 2.66  | 4.01  | -4.21 | 4.75 |
| OR6G2      | 26492  | NM_001007249 | 2807 | 3.11  | 1.35  | 0.72  | -0.04 | -0.86 | -0.85 | 2.23  | 1.35  | 1.17  | 5.19  | -1.67 | 4.75 |
| 344558     | 344558 | NM_201097    | 2808 | 8.74  | 15.83 | 8.07  | 0.29  | 0.68  | 1.00  | 1.14  | 2.46  | 1.15  | 30.64 | -2.97 | 4.75 |
| SLC12A2    | 6558   | NM_001046    | 2809 | 0.70  | -0.15 | 0.26  | -1.00 | -0.75 | -1.78 | -0.35 | 0.42  | 4.68  | 0.58  | -2.63 | 4.75 |
| ERCCA      | 2072   | NM_005236    | 2810 | 0.17  | 1.79  | 0.45  | -0.79 | -1.06 | -0.49 | 0.75  | 3.26  | 0.74  | 2.41  | -2.33 | 4.75 |
| CARD12     | 58484  | NM_012109    | 2811 | 2.76  | 2.90  | 3.34  | 0.26  | 0.52  | 0.77  | 1.18  | 2.18  | 1.39  | 9.01  | 1.54  | 4.74 |
| FLJ202     | 262    | NM_015979    | 2812 | 0.58  | 1.93  | 1.92  | -0.75 | -1.75 | -0.75 | 1.93  | 1.92  | 1.92  | 3.45  | -2.77 | 4.74 |
| C108R91    | 170393 | NM_173541    | 2813 | 2.11  | 2.06  | 2.10  | -0.31 | 0.29  | 0.29  | 1.20  | 2.34  | 2.31  | 6.37  | 0.96  | 4.74 |
| SFAZ       | 8175   | NM_007165    | 2814 | -0.75 | -1.24 | -0.38 | -1.24 | -1.31 | -2.76 | 0.45  | -0.19 | 4.48  | -2.37 | -5.30 | 4.74 |
| LOC106462  | 2044   | NM_032568    | 2815 | 2.71  | 1.74  | 1.67  | -0.42 | -1.03 | -0.42 | 1.74  | 1.67  | 1.67  | 6.12  | -0.27 | 4.74 |
| CSF2       | 1478   | NM_001325    | 2816 | 0.56  | 0.87  | 0.40  | -1.47 | -1.39 | -1.10 | 1.78  | 1.94  | 1.02  | 1.84  | -3.96 | 4.74 |
| PAG        | 55824  | NM_018480    | 2817 | 0.72  | 1.79  | 2.10  | -0.74 | -0.54 | -0.01 | 1.16  | 1.82  | 1.76  | 4.61  | -1.29 | 4.74 |
| STMA1      | 294    | NM_014421    | 2818 | 2.13  | 1.74  | 0.23  | -0.45 | -1.10 | -0.45 | 2.13  | 1.74  | 0.23  | 1.22  | -0.45 | 4.74 |
| LOC255798  | 255798 | NM_001077657 | 2819 | 1.99  | 1.71  | 1.42  | -0.06 | -0.39 | 0.95  | 0.72  | 2.61  | 1.40  | 5.11  | 0.51  | 4.73 |
| THA        | 7067   | NM_199334    | 2820 | 0.89  | 0.45  | 1.91  | -0.79 | -0.22 | -0.03 | 1.70  | 0.65  | 2.38  | 3.25  | -1.03 | 4.73 |
| ATRA       | 468    | NM_182810    | 2821 | 0.32  | 1.73  | -0.05 | -0.41 | -0.48 | -0.69 | 0.97  | 3.79  | -0.03 | 2.00  | -0.57 | 4.73 |
| NINDCS     | 8159   | NM_038810    | 2822 | 1.86  | 1.54  | 1.22  | -0.36 | -0.36 | -0.36 | 1.44  | 1.67  | 1.64  | 4.62  | 0.32  | 4.73 |
| LOC343637  | 343637 | NM_001040007 | 2823 | 2.78  | 1.91  | 1.69  | -0.38 | -0.13 | -0.34 | 1.93  | 1.25  | 1.54  | 6.37  | -0.37 | 4.73 |
| LOC389123  | 389123 | NM_203424    | 2824 | -0.11 | 0.39  | -0.37 | -0.35 | -0.37 | 0.79  | 1.94  | 1.41  | 1.38  | -0.10 | -1.51 | 4.73 |
| ADAM11     | 418    | NM_001290    | 2825 | 1.18  | 1.01  | 1.14  | -1.05 | -0.42 | -1.10 | 1.18  | 1.01  | 1.14  | 4.32  | -2.00 | 4.73 |
| FBX18      | 80028  | NM_024963    | 2826 | 1.96  | 2.25  | 2.61  | -0.30 | -0.37 | -0.64 | 1.15  | 1.00  | 2.58  |       |       |      |

|           |        |              |      |       |       |       |       |       |       |       |       |       |       |       |       |
|-----------|--------|--------------|------|-------|-------|-------|-------|-------|-------|-------|-------|-------|-------|-------|-------|
| TRAP1     | 10131  | NM_016292    | 2909 | 0.96  | -0.13 | 1.28  | -1.02 | -1.19 | 0.68  | 1.49  | 1.55  | 1.56  | 2.10  | -1.53 | 4.60  |
| PHM4      | 2685   | NM_012327    | 2910 | -1.01 | 1.26  | 1.40  | -1.00 | -0.79 | -1.87 | 1.22  | 1.88  | 1.22  | 1.28  | -0.70 | -4.16 |
| MF4A      | 4239   | NM_002004    | 2910 | 1.58  | 0.35  | 0.52  | -1.06 | -0.45 | -1.01 | 3.03  | 0.28  | 1.28  | 2.45  | -2.52 | 4.99  |
| LOC112937 | 112937 | NM_138416    | 2911 | 0.90  | -1.49 | 0.25  | -1.15 | -2.98 | -1.78 | 1.78  | 0.12  | 2.70  | -0.34 | -5.91 | 4.99  |
| GF2       | 2977   | NM_002088    | 2913 | 0.27  | 0.93  | -0.05 | -0.95 | -1.24 | -1.00 | 1.12  | 2.49  | 0.98  | 1.15  | -3.25 | 4.99  |
| PHM1      | 5292   | NM_002048    | 2914 | 0.87  | 0.87  | 0.35  | -1.36 | -1.12 | -0.32 | 1.36  | 1.12  | 0.92  | 2.55  | -2.57 | 4.99  |
| E2F6      | 1876   | NM_212540    | 2915 | 2.44  | 3.79  | 3.16  | 0.46  | 0.17  | 0.21  | 0.60  | 2.35  | 1.63  | 9.38  | 0.83  | 4.59  |
| Q8RF      | 23548  | NM_012182    | 2916 | 0.78  | 0.52  | 0.38  | -0.83 | -0.73 | -1.31 | 1.24  | 1.42  | 1.93  | 1.69  | -2.86 | 4.59  |
| ZNF529    | 5771   | NM_020951    | 2917 | 0.67  | 0.57  | 0.75  | -0.67 | -0.57 | -0.75 | 0.67  | 0.57  | 0.75  | 1.06  | 1.75  | 4.59  |
| SELV      | 348303 | NM_182704    | 2918 | -0.89 | -0.35 | -0.35 | -1.57 | -1.75 | -1.82 | 0.08  | 2.56  | 1.95  | -1.60 | -1.15 | 4.59  |
| WWP1      | 11059  | NM_007013    | 2919 | 0.74  | 0.22  | -0.01 | -1.01 | -0.63 | -1.08 | 2.64  | 0.93  | 1.01  | 0.96  | -2.72 | 4.58  |
| LOC348180 | 348180 | NM_01221262  | 2920 | -0.80 | 0.65  | 0.52  | -0.80 | -0.65 | -0.52 | 0.80  | -0.65 | -0.52 | 0.80  | -0.65 | -0.52 |
| TSLP      | 85490  | NM_138551    | 2921 | 0.09  | -0.17 | -0.24 | -1.59 | -1.58 | -1.55 | 1.78  | 1.25  | 1.55  | -0.31 | -4.70 | 4.58  |
| CA7       | 766    | NM_005182    | 2922 | -0.33 | 1.54  | 0.71  | -0.88 | -0.73 | -0.58 | 0.22  | 2.63  | 1.73  | 1.91  | -2.20 | 4.57  |
| PHM5      | 22845  | NM_014908    | 2923 | 2.68  | 2.68  | 1.73  | -1.10 | 0.27  | 0.99  | 2.38  | 1.23  | 0.97  | 7.09  | 1.16  | 4.57  |
| E2F2      | 1938   | NM_002961    | 2924 | -1.03 | -1.32 | -1.11 | -1.08 | -2.33 | -2.31 | 1.71  | 0.79  | 2.66  | 3.47  | -0.77 | 4.57  |
| VRK3      | 51231  | NM_001025778 | 2925 | 0.17  | 1.15  | 0.43  | -0.42 | -0.69 | -0.72 | 1.13  | 2.36  | 1.08  | 1.75  | -1.83 | 4.57  |
| BT64      | 54766  | NM_017589    | 2926 | -0.58 | -0.45 | 0.01  | -2.19 | -1.39 | -1.40 | 1.94  | 0.73  | 1.90  | -1.02 | -4.98 | 4.57  |
| NB11      | 79858  | NM_145910    | 2927 | 3.23  | 1.78  | 1.15  | -0.11 | 0.35  | -0.46 | 2.33  | 0.94  | 1.20  | 6.16  | 0.22  | 4.57  |
| PPP6C     | 5537   | NM_002721    | 2928 | 0.56  | 1.73  | 1.05  | -0.20 | -0.86 | -1.31 | 0.81  | 1.87  | 1.89  | 3.34  | -2.47 | 4.57  |
| TEF2      | 7014   | NM_005652    | 2929 | 2.18  | 0.97  | 1.15  | 0.25  | 0.41  | -0.09 | 2.00  | 1.11  | 1.45  | 4.31  | 0.58  | 4.56  |
| GUP1      | 145791 | NM_00118095  | 2930 | 0.69  | 1.20  | -0.33 | -0.88 | -1.13 | -1.30 | 1.06  | 2.41  | 1.09  | 1.50  | -3.30 | 4.56  |
| Q8H4      | 26682  | NM_00100495  | 2931 | 1.54  | 1.58  | 0.51  | -0.59 | -0.19 | -0.01 | 2.73  | 1.42  | 0.40  | 3.65  | -0.79 | 4.56  |
| CLNS1A    | 1207   | NM_001293    | 2932 | 2.53  | 2.28  | 1.97  | 0.82  | -0.17 | -0.16 | 1.32  | 1.51  | 1.73  | 6.78  | 0.49  | 4.56  |
| LOC113179 | 113179 | NM_138422    | 2933 | -0.30 | 1.74  | 1.13  | -0.08 | -0.25 | -0.79 | -0.28 | 1.30  | 1.74  | 2.58  | -1.07 | 4.55  |
| SLC26A5   | 11182  | NM_017085    | 2934 | 1.21  | 0.89  | 0.65  | -0.16 | -0.76 | -0.02 | 1.53  | 1.84  | 1.99  | 2.56  | -1.54 | 4.55  |
| GRIA2     | 2891   | NM_000826    | 2935 | 1.85  | 1.79  | 1.44  | -0.64 | 1.66  | 0.35  | 2.09  | 0.94  | 1.52  | 5.08  | 1.37  | 4.55  |
| SN        | 6614   | NM_023068    | 2936 | 1.32  | 1.68  | 1.65  | -0.15 | -0.04 | -0.20 | 1.66  | 1.86  | 1.03  | 4.64  | -0.45 | 4.55  |
| MAP3F3    | 5459   | NM_002700    | 2937 | 0.89  | 0.89  | -1.11 | -1.15 | -1.15 | -1.15 | 0.68  | 1.49  | 0.74  | -0.85 | -0.41 | 4.55  |
| MGC13967  | 203260 | NM_174923    | 2938 | -0.19 | -0.64 | 1.16  | -0.63 | -0.41 | -0.56 | 1.40  | 0.56  | 2.58  | 0.33  | -1.60 | 4.54  |
| PLC1      | 89869  | NM_033123    | 2939 | 1.58  | 2.00  | 1.15  | 0.16  | -1.09 | -0.18 | 0.91  | 2.74  | 0.90  | 4.72  | -1.12 | 4.54  |
| HNA1106   | 8020   | NM_002026    | 2940 | 0.58  | -0.97 | -0.97 | -2.38 | -2.19 | -1.43 | 0.88  | 0.58  | 0.20  | -2.19 | -4.58 | 4.54  |
| ITFAP1    | 81851  | NM_030967    | 2941 | 0.57  | 1.16  | 0.32  | -0.93 | -0.78 | -1.27 | 1.06  | 1.83  | 1.65  | 2.05  | -2.98 | 4.54  |
| LOC340267 | 340267 | NM_010337763 | 2942 | 3.23  | 1.90  | 2.71  | 1.48  | 0.04  | 0.54  | 1.18  | 2.16  | 1.20  | 7.85  | 2.06  | 4.54  |
| ATP5C1    | 509    | NM_005174    | 2943 | 2.13  | 1.85  | 1.01  | -0.49 | 0.63  | -0.79 | 2.43  | 0.74  | 1.36  | 4.99  | -0.60 | 4.54  |
| CD9E      | 1007   | NM_016279    | 2944 | 0.48  | 0.75  | 0.17  | -0.58 | -0.72 | -0.56 | 1.42  | 0.76  | 2.41  | 2.41  | 0.52  | 4.54  |
| LOC144983 | 144983 | NM_001011725 | 2945 | -0.81 | -1.02 | -0.41 | -2.12 | -1.76 | -1.60 | 1.77  | 1.08  | 1.69  | -2.24 | -5.48 | 4.54  |
| TAF1L     | 138476 | NM_153809    | 2946 | 1.18  | 2.03  | 0.84  | -0.92 | -0.88 | -0.74 | 1.20  | 2.41  | 0.93  | 4.05  | -2.53 | 4.54  |
| CD9M16    | 6297   | NM_195454    | 2947 | 0.52  | 1.68  | 2.34  | 1.15  | 1.49  | 1.18  | 1.15  | 1.49  | 1.18  | 1.15  | 1.49  | 1.18  |
| DAO       | 1610   | NM_001917    | 2948 | 1.24  | 2.47  | 2.59  | 0.98  | 0.16  | -0.20 | 0.52  | 1.61  | 2.40  | 6.30  | 0.94  | 4.53  |
| POA1      | 79016  | NM_024050    | 2949 | 1.01  | 0.60  | 0.64  | -1.18 | -0.34 | -1.34 | 2.11  | 0.75  | 1.67  | 2.25  | -2.86 | 4.53  |
| EIF1D1    | 12849  | NM_0100477   | 2950 | 1.95  | 1.13  | 1.03  | -0.60 | -0.57 | -0.50 | 1.99  | 1.88  | 1.50  | 4.09  | -1.61 | 4.53  |
| EIF1E1    | 9521   | NM_004280    | 2951 | 1.93  | 1.80  | 1.10  | -0.10 | 0.26  | 0.89  | 1.29  | 2.72  | 0.52  | 7.83  | 1.05  | 4.53  |
| STX2D     | 83942  | NM_032028    | 2952 | 2.26  | 1.81  | 1.50  | -0.35 | -0.60 | -1.04 | 1.02  | 1.60  | 1.90  | 5.56  | -1.98 | 4.52  |
| ENPP1     | 5187   | NM_006208    | 2953 | 1.11  | 0.87  | 0.61  | -0.82 | -0.95 | -0.43 | 1.27  | 2.43  | 0.83  | 2.59  | -2.20 | 4.52  |
| ZEB1      | 2350   | NM_013545    | 2954 | 1.70  | 1.45  | 1.88  | -0.32 | -0.60 | -0.32 | 1.70  | 1.45  | 1.88  | 0.59  | 0.65  | 4.52  |
| RHD1D     | 54933  | NM_017821    | 2955 | 1.61  | 0.63  | 1.00  | -0.85 | -0.38 | -0.44 | 1.89  | 0.91  | 1.72  | 3.24  | -1.67 | 4.52  |
| Q8H4      | 81300  | NM_001004124 | 2956 | 1.70  | 0.72  | 0.49  | -0.22 | -1.48 | -0.52 | 1.16  | 2.22  | 1.13  | 2.91  | -2.22 | 4.52  |
| LOC11042  | 11042  | NM_020499    | 2957 | 1.78  | 1.47  | 1.47  | -0.72 | -1.47 | -1.47 | 1.78  | 1.47  | 1.47  | 1.78  | 1.47  | 1.47  |
| SFPH2     | 11160  | NM_01003791  | 2958 | 1.01  | 1.13  | 1.03  | -1.08 | -1.07 | -0.56 | 1.13  | 1.12  | 1.17  | 3.17  | -2.71 | 4.51  |
| SUT2      | 9353   | NM_004787    | 2959 | 0.89  | 1.26  | 0.40  | 0.15  | -0.84 | 0.55  | 1.39  | 2.93  | 0.19  | 2.54  | -0.13 | 4.51  |
| SFPI1     | 57878  | NM_012718    | 2960 | -0.37 | 1.79  | 1.48  | 1.70  | 1.48  | 1.70  | 1.79  | 1.48  | 1.70  | 4.97  | -1.07 | 4.51  |
| WDR13     | 64743  | NM_017883    | 2961 | -0.06 | 1.24  | 0.61  | -1.07 | -0.94 | -0.47 | 0.98  | 1.38  | 0.35  | 1.79  | -1.54 | 4.51  |
| TNFRSF6B  | 8771   | NM_003822    | 2962 | 0.00  | 1.78  | 1.68  | 1.10  | 1.12  | -0.41 | -0.38 | 0.35  | 1.84  | 3.46  | 1.81  | 4.51  |
| ASP       | 434    | NM_001572    | 2963 | -0.11 | -0.03 | 0.26  | 0.43  | -0.78 | -0.32 | 0.49  | 1.93  | 2.08  | 0.09  | -0.68 | 4.50  |
| PCDH11    | 56139  | NM_031861    | 2964 | 1.40  | 1.24  | 1.79  | 0.17  | 0.86  | 0.87  | 2.45  | 1.44  | 0.71  | 8.43  | 1.88  | 4.50  |
| AFD1      | 378708 | NM_199294    | 2965 | 0.42  | 0.58  | 0.51  | -1.14 | -0.78 | -0.23 | 2.72  | 1.90  | 0.13  | 1.51  | -1.68 | 4.50  |
| TRNG1     | 84897  | NM_032811    | 2966 | 2.09  | 3.88  | 1.80  | 0.63  | 0.44  | 0.07  | 0.74  | 2.60  | 1.15  | 7.76  | 1.15  | 4.49  |
| TNRD2     | 10587  | NM_016748    | 2967 | 0.59  | 0.64  | 0.64  | -0.59 | -0.64 | -0.64 | 0.59  | 0.64  | 0.64  | 0.59  | 0.64  | 0.64  |
| FLJ13846  | 160857 | NM_144974    | 2968 | 2.14  | 1.74  | 0.79  | 0.09  | 0.32  | -1.10 | 2.09  | 0.66  | 1.74  | 4.67  | 0.32  | 4.49  |
| SURN      | 532381 | NM_181506    | 2969 | 1.27  | 1.81  | 0.78  | -0.52 | -0.58 | -0.50 | 1.72  | 1.74  | 1.03  | 3.86  | -1.60 | 4.49  |
| EIF2      | 51397  | NM_005665    | 2970 | 0.34  | 0.47  | 0.47  | -1.31 | -1.06 | -0.92 | 2.10  | 0.97  | 0.47  | 0.60  | -0.29 | 4.49  |
| MPLR2     | 51969  | NM_015950    | 2971 | 1.84  | 0.59  | 0.94  | 0.28  | 0.51  | -0.50 | 2.12  | 1.47  | 1.89  | 3.17  | 0.29  | 4.49  |
| SMND1     | 10285  | NM_005871    | 2972 | -0.52 | -0.71 | -0.21 | -2.02 | -2.05 | -1.89 | 0.96  | 1.01  | 2.52  | -1.44 | -5.96 | 4.49  |
| FLJ10099  | 55909  | NM_017994    | 2973 | -0.58 | -0.59 | -0.08 | -1.67 | -1.86 | -1.45 | 1.15  | 1.35  | 2.20  | -1.22 | -4.98 | 4.49  |
| MAR26     | 5654   | NM_022801    | 2974 | 1.17  | 1.74  | 1.17  | -1.39 | -1.39 | -1.39 | 1.17  | 1.74  | 1.17  | 1.17  | 1.74  | 1.17  |
| LOC72780  | 72780  | NM_010083124 | 2975 | 4.30  | 4.08  | 3.04  | 1.23  | 1.83  | -0.34 | 1.59  | 1.32  | 1.57  | 11.42 | 2.71  | 4.49  |
| BOPI      | 23246  | NM_015201    | 2976 | -0.85 | -0.51 | -1.39 | -2.22 | -1.92 | -2.11 | 1.20  | 3.25  | 0.03  | -2.75 | -6.25 | 4.49  |
| FLJ203    | 7347   | NM_005002    | 2977 | 0.26  | 0.66  | 0.66  | -0.26 | -0.66 | -0.66 | 0.26  | 0.66  | 0.66  | 0.26  | 0.66  | 0.66  |
| FLJ20054  | 54530  | NM_019049    | 2978 | 0.55  | 2.71  | 1.93  | 0.13  | 0.27  | -0.58 | 0.04  | 1.80  | 2.64  | 5.19  | -0.18 | 4.48  |
| FLJ30473  | 150209 | NM_144704    | 2979 | 0.21  | 0.22  | -0.05 | -1.37 | -0.97 | 0.16  | 3.02  | 0.81  | 0.64  | 0.38  | -2.17 | 4.48  |
| RACGAP37  | 29127  | NM_0100277   | 2980 | 1.96  | 2.78  | 2.78  | 1.96  | 2.78  | 2.78  | 1.96  | 2.78  | 2.78  | 1.96  | 2.78  | 2.78  |
| FLJ32783  | 158787 | NM_010013745 | 2981 | -0.54 | 0.40  | -0.40 | -1.34 | -1.58 | -1.49 | 0.62  | 2.30  | 1.56  | 0.55  | -4.42 | 4.48  |
| OPN1      | 8481   | NM_003611    | 2982 | -0.06 | 2.01  | 1.11  | 1.31  | 0.96  | 0.47  | 0.06  | 2.27  | 2.26  | 3.66  | -2.73 | 4.47  |
| KIF4A     | 3841   | NM_002269    | 2983 | 1.56  | 1.10  | 0.00  | -0.35 | -0.77 | -0.97 | 2.29  | 1.51  | 0.67  | 2.66  | -2.09 | 4.47  |
| LOC1143   | 6818   | NM_177552    | 2984 | 0.78  | 1.18  | 1.36  | 0.38  | 0.17  | 0.38  | 1.73  | 1.42  | 1.37  | 3.32  | 0.38  | 4.47  |
| SF10      | 3431   | NM_004510    | 2985 | 5.34  | 4.16  | 1.89  | 1.00  | 1.09  | 0.56  | 2.57  | 1.15  | 0.75  | 11.38 | 2.66  | 4.46  |
| NF-E4     | 58160  | NM_01008386  | 2986 | 1.24  | 0.19  | 0.74  | -1.24 | -0.85 | -0.62 | 2.85  | 1.01  | 0.60  | 2.17  | -2.71 | 4.46  |
| LOC11     | 5145   | NM_016827    | 2987 | 1.17  | 0.77  | 0.66  | -1.17 | -0.77 | -0.66 | 1.17  | 0.77  | 0.66  | 1.17  | 0.77  | 0.66  |
| LOC12420  | 12420  | NM_144520    | 2988 | -0.68 | -0.24 | -0.29 | -1.74 | -1.34 | -1.35 | 0.71  | 1.79  | 1.97  | -1.21 | -4.43 | 4.46  |
| RBM11     | 54033  | NM_144770    |      |       |       |       |       |       |       |       |       |       |       |       |       |

|           |        |             |      |       |       |       |       |       |       |       |       |       |       |       |      |
|-----------|--------|-------------|------|-------|-------|-------|-------|-------|-------|-------|-------|-------|-------|-------|------|
| LOC15548  | 11548  | NM_138782   | 3071 | 2.26  | 4.32  | 4.66  | 1.50  | -0.18 | -0.22 | 0.64  | 2.49  | 1.23  | 11.24 | 1.09  | 4.37 |
| FSH8B     | 5898   | NM_021954   | 3072 | 0.63  | 1.02  | 1.05  | 0.71  | -0.27 | -0.92 | 1.20  | 2.31  | 1.86  | 2.70  | 1.07  | 4.87 |
| CYSLR1    | 57105  | NM_020377   | 3073 | 1.10  | 1.89  | 1.36  | 0.04  | -0.21 | -0.50 | 1.18  | 1.67  | 1.52  | 5.35  | -0.67 | 4.37 |
| NCXAP2    | 10787  | NM_013436   | 3074 | 1.24  | 0.84  | 0.40  | -0.77 | -0.64 | -0.94 | 1.64  | 1.12  | 1.60  | 2.48  | -2.35 | 4.36 |
| CPO       | 1362   | NM_001304   | 3075 | -0.13 | -0.27 | 0.34  | -1.61 | -1.64 | -1.43 | 1.17  | 1.42  | 1.77  | -0.06 | -4.88 | 4.36 |
| ORC1      | 30083  | NM_0001558  | 3076 | 3.55  | 2.42  | 1.59  | 0.42  | -0.42 | -0.48 | 2.25  | 0.44  | 1.62  | 5.57  | 1.05  | 3.96 |
| PAGE-1    | 57147  | NM_181093   | 3077 | 1.23  | 1.34  | 1.91  | 0.21  | -0.04 | 0.59  | 1.69  | 1.15  | 1.52  | 4.48  | 0.75  | 4.36 |
| LAMB4     | 22798  | NM_007356   | 3078 | 1.22  | 0.63  | 0.37  | 0.83  | -0.18 | -0.22 | 1.51  | 1.38  | 1.47  | 2.22  | 0.43  | 4.35 |
| SPC25     | 57405  | NM_020075   | 3079 | 0.82  | 1.86  | 2.26  | 0.99  | -0.12 | 0.79  | 1.22  | 1.86  | 2.29  | 2.24  | 0.71  | 4.35 |
| LOC285429 | 285429 | NM_01029955 | 3080 | 0.00  | 0.76  | 1.39  | -1.48 | -1.05 | -0.13 | 1.21  | 1.90  | 1.24  | 2.16  | -2.66 | 4.35 |
| WAS1      | 8976   | NM_003941   | 3081 | 1.00  | 0.27  | 0.79  | 0.70  | -0.72 | -0.37 | 2.23  | 0.67  | 1.45  | 2.06  | -1.80 | 4.35 |
| PTFAA2    | 8073   | NM_008439   | 3082 | 1.41  | 0.84  | 0.92  | 0.81  | -0.79 | -0.97 | 1.88  | 1.40  | 1.88  | 2.97  | -1.43 | 4.35 |
| LRFN4     | 78999  | NM_024036   | 3083 | 1.70  | 0.53  | -0.50 | -0.53 | -1.36 | -0.64 | 2.19  | 1.95  | 2.21  | 1.72  | -2.53 | 4.35 |
| CLASP1    | 23332  | NM_015282   | 3084 | 2.34  | 2.95  | 1.78  | 0.81  | 0.77  | 0.37  | 1.27  | 1.12  | 1.96  | 7.07  | 1.95  | 4.35 |
| FLJ23888  | 64800  | NM_198856   | 3085 | 0.21  | 0.76  | 0.66  | -0.88 | -0.87 | -0.18 | 1.00  | 1.81  | 1.55  | 1.63  | -1.73 | 4.35 |
| DCAT1     | 8084   | NM_0102979  | 3086 | 1.42  | 1.27  | 2.77  | -0.13 | -0.43 | 0.03  | 0.85  | 2.42  | 1.08  | 9.46  | -0.48 | 4.35 |
| NRM       | 11270  | NM_007243   | 3087 | 1.14  | 0.49  | 0.46  | 0.60  | -0.01 | 0.00  | 2.46  | 0.42  | 1.46  | 2.09  | 0.60  | 4.34 |
| FLJ20989  | 65205  | NM_023080   | 3088 | 1.53  | 3.38  | 1.11  | -0.66 | -0.07 | 0.35  | 1.31  | 2.35  | 0.68  | 6.01  | -0.39 | 4.34 |
| NM15585   | 15585  | NM_123465   | 3089 | 1.21  | 1.04  | 1.56  | 0.11  | 0.24  | -0.48 | 0.93  | 1.85  | 1.57  | 3.81  | 0.13  | 4.34 |
| FLJ38822  | 38846  | NM_207398   | 3090 | -0.27 | 0.97  | 0.01  | -1.13 | -0.48 | -0.55 | 1.37  | 1.69  | 1.27  | 0.71  | -2.16 | 4.33 |
| PGLYRP2   | 114770 | NM_052890   | 3091 | 1.19  | 1.30  | 1.06  | -0.58 | -0.67 | -0.12 | 1.77  | 1.66  | 0.90  | 3.55  | -1.38 | 4.33 |
| PP1R3D    | 5599   | NM_000242   | 3092 | 0.43  | -0.78 | -1.38 | -1.68 | -2.04 | -0.07 | 4.81  | 0.29  | 0.79  | -1.73 | -4.58 | 4.33 |
| TSC       | 54997  | NM_017899   | 3093 | 0.02  | 1.29  | 1.98  | 0.50  | -0.59 | 0.42  | 0.22  | 2.73  | 1.93  | 3.28  | 0.33  | 4.33 |
| FSH8      | 2488   | NM_01018080 | 3094 | 2.03  | 2.16  | 3.36  | 1.09  | 1.17  | -0.53 | 0.79  | 0.52  | 3.02  | 7.54  | 1.74  | 4.33 |
| KIF9      | 64147  | NM_182901   | 3095 | -0.46 | 0.98  | 0.45  | 0.53  | 0.16  | 0.20  | -0.03 | 1.77  | 2.50  | 0.97  | 0.89  | 4.33 |
| IFR8      | 1077   | NM_004002   | 3096 | 0.97  | 1.18  | 1.99  | 1.63  | 1.18  | 0.35  | 0.27  | 1.83  | 2.23  | 4.14  | 3.16  | 4.33 |
| ZNF258    | 9204   | NM_007167   | 3097 | 2.37  | 1.03  | 0.51  | -0.21 | 0.28  | -0.85 | 2.82  | 0.31  | 1.19  | 3.91  | -0.78 | 4.33 |
| KITGA     | 3853   | NM_005554   | 3098 | 0.73  | 5.26  | 4.42  | 2.76  | 2.94  | 2.19  | 1.85  | 1.45  | 1.03  | 16.42 | 7.88  | 4.33 |
| GNL1      | 6305   | NM_009046   | 3099 | 0.61  | 0.67  | 0.47  | -0.06 | 1.67  | 0.79  | 1.07  | 1.47  | 1.47  | 2.55  | 1.31  | 4.33 |
| MAJ218P   | 9587   | NM_014628   | 3100 | 0.03  | 0.13  | 0.17  | -1.38 | -1.62 | -1.22 | 0.85  | 2.57  | 0.90  | 0.32  | -4.22 | 4.32 |
| MA51      | 3036   | NM_001523   | 3101 | 1.04  | -0.26 | 1.44  | -0.58 | -0.15 | -0.58 | 1.54  | 0.01  | 2.77  | 2.22  | -1.32 | 4.32 |
| FLJ35CA   | 7159   | NM_001401   | 3102 | -0.15 | 1.12  | 0.23  | -0.18 | -0.09 | -1.73 | -0.68 | 1.70  | 2.60  | 1.60  | -2.19 | 4.32 |
| LOC51668  | 51668  | NM_016126   | 3103 | 0.08  | 0.63  | 1.65  | -0.50 | -1.59 | -1.00 | -0.15 | 1.82  | 2.65  | 2.36  | -3.09 | 4.32 |
| URD       | 10537  | NM_006398   | 3104 | 1.42  | 2.29  | 0.29  | -0.34 | -0.58 | 0.02  | 1.38  | 0.06  | -0.11 | 4.00  | -0.90 | 4.32 |
| ITGB1     | 3688   | NM_038668   | 3105 | 1.51  | 0.49  | 0.75  | -0.91 | -0.51 | -0.33 | 1.55  | 1.59  | 1.18  | 2.75  | -1.75 | 4.32 |
| DNM2C     | 23564  | NM_0102974  | 3106 | 1.12  | 1.92  | 0.55  | -0.92 | -0.45 | -0.92 | 1.01  | 0.62  | 2.66  | 3.10  | -2.10 | 4.32 |
| AD03      | 120    | NM_019903   | 3107 | 2.20  | 0.43  | 0.94  | -1.14 | -0.07 | 1.06  | 3.65  | 0.61  | 0.06  | 3.58  | 0.85  | 4.32 |
| MAN2B2    | 23242  | NM_015274   | 3108 | -0.25 | 0.34  | -0.66 | -1.49 | -1.82 | -1.78 | -0.12 | 3.61  | 0.83  | -0.83 | -0.59 | 4.32 |
| LOC121262 | 121262 | NM_0102972  | 3109 | 1.29  | 0.66  | 1.50  | -0.86 | -0.58 | -0.58 | 2.45  | 2.32  | 1.23  | 4.25  | 2.23  | 4.32 |
| FLJ46321  | 389763 | NM_01001670 | 3110 | 1.90  | 1.08  | -0.01 | -0.45 | -0.82 | -1.17 | 1.43  | 1.50  | 1.39  | 2.27  | -4.44 | 4.32 |
| IFR3      | 3710   | NM_002224   | 3111 | -0.78 | 0.41  | -0.06 | -1.73 | -1.66 | -1.08 | 1.06  | 1.59  | 1.67  | -1.25 | -4.46 | 4.32 |
| ICP       | 5649   | NM_017848   | 3112 | -0.63 | 0.74  | 0.13  | -0.11 | 1.59  | 0.13  | -0.12 | 1.67  | 1.62  | 0.72  | -2.81 | 4.32 |
| ICMNB2    | 10242  | NM_005832   | 3113 | 0.56  | 0.29  | 0.92  | -0.97 | -0.45 | -1.04 | 1.57  | -0.01 | 2.76  | 1.19  | -2.46 | 4.31 |
| MLL2      | 4299   | NM_005935   | 3114 | 0.56  | 0.60  | 1.36  | -0.60 | -0.24 | -0.68 | 0.88  | 1.17  | 2.26  | 2.51  | -1.51 | 4.31 |
| PHF2      | 57157  | NM_020432   | 3115 | 5.35  | 2.83  | 3.21  | 0.73  | -0.44 | 0.42  | 1.44  | 1.90  | 0.97  | 11.20 | 0.71  | 4.31 |
| MRPS11    | 64805  | NM_176005   | 3116 | 3.56  | 0.90  | 1.54  | 0.02  | 0.90  | 2.79  | 0.86  | 1.50  | 1.59  | 5.99  | 3.30  | 4.31 |
| MLL1      | 4632   | NM_079422   | 3117 | 0.38  | 0.56  | 0.77  | -0.46 | -0.93 | -1.11 | 0.82  | 1.44  | 2.05  | 1.71  | -2.51 | 4.31 |
| IFD2      | 7866   | NM_006764   | 3118 | -0.34 | 1.96  | 0.25  | -0.71 | -0.30 | -0.91 | 0.24  | 2.72  | 3.14  | 1.88  | -1.91 | 4.31 |
| FLJ15184  | 5177   | NM_015894   | 3119 | 1.29  | 1.23  | 1.57  | 1.88  | 1.02  | 1.32  | 1.58  | 1.02  | 1.32  | 7.28  | 0.50  | 4.31 |
| RPK2      | 8767   | NM_003821   | 3120 | 1.72  | 1.43  | 2.30  | -0.25 | 0.67  | 0.88  | 2.26  | 0.42  | 1.62  | 5.45  | 1.30  | 4.31 |
| SFRS12    | 140890 | NM_01017939 | 3121 | 0.46  | 0.79  | -0.46 | -0.93 | -0.66 | -0.89 | 0.81  | 1.84  | 1.66  | 0.78  | -2.48 | 4.30 |
| ZHHHC11   | 7894   | NM_002224   | 3122 | 1.26  | 1.07  | 2.08  | -1.07 | -1.82 | -1.45 | 1.82  | 1.46  | 1.92  | 4.36  | -0.50 | 4.30 |
| ATG5      | 9474   | NM_004849   | 3123 | 1.04  | 1.50  | 0.96  | -0.41 | -0.55 | -0.69 | 0.98  | 1.41  | 1.93  | 3.30  | -1.65 | 4.30 |
| POLR2E    | 5118   | NM_002593   | 3124 | -0.30 | -1.09 | 0.25  | -1.46 | -1.78 | -1.67 | 1.55  | -0.03 | 2.78  | -1.14 | -4.91 | 4.30 |
| GTPBP5    | 26154  | NM_015666   | 3125 | -0.62 | 0.82  | -1.05 | -1.23 | -1.20 | -1.33 | 0.80  | 2.79  | 0.71  | -0.86 | -3.77 | 4.30 |
| MGST1     | 4257   | NM_145792   | 3126 | 1.11  | 1.14  | 1.53  | 1.12  | -0.14 | -0.02 | 0.00  | 1.42  | 1.44  | 1.44  | -2.44 | 4.30 |
| UNSNRNP6  | 11066  | NM_022717   | 3127 | -0.36 | -0.81 | -0.16 | -1.76 | -1.51 | -1.61 | 1.83  | 0.43  | 2.04  | -1.33 | -4.88 | 4.30 |
| KIAA1906  | 114795 | NM_052907   | 3128 | -0.79 | -0.25 | -0.02 | -1.44 | -1.58 | -1.21 | 0.53  | 2.36  | 1.41  | -1.07 | -4.23 | 4.29 |
| T4        | 234    | NM_002020   | 3129 | 0.70  | 0.88  | 0.88  | -1.02 | -0.49 | -0.86 | 1.52  | 1.42  | 1.89  | 3.04  | 1.74  | 4.29 |
| NMCRD22   | 118932 | NM_144590   | 3130 | 0.48  | 0.12  | 0.32  | -0.61 | -1.28 | -0.98 | 0.49  | 1.61  | 2.19  | 0.68  | -2.87 | 4.29 |
| FLJ9036   | 254403 | NM_01039127 | 3131 | 1.62  | 0.76  | 1.01  | -0.45 | -0.49 | -0.47 | 1.50  | 0.96  | 1.83  | 3.39  | -1.41 | 4.29 |
| AJRRF1    | 9131   | NM_008429   | 3132 | -0.79 | -0.81 | -0.81 | -0.55 | -1.89 | -1.05 | 2.58  | 1.22  | 0.65  | -2.50 | -5.58 | 4.29 |
| FLJ4952   | 163933 | NM_207334   | 3133 | 4.28  | 1.22  | 2.49  | 0.19  | -0.03 | 0.07  | 2.00  | 1.35  | 0.94  | 10.00 | 0.24  | 4.28 |
| ITAF5     | 6897   | NM_152295   | 3134 | 0.44  | 1.92  | 0.13  | -0.44 | -0.34 | 0.15  | 0.57  | 3.90  | 0.18  | 2.48  | -0.62 | 4.28 |
| SNF7      | 55509  | NM_018664   | 3135 | 2.57  | 1.31  | 0.65  | -0.21 | -0.72 | -0.68 | 1.68  | 1.72  | 0.88  | 4.53  | -1.61 | 4.28 |
| LOC121262 | 583    | NM_002861   | 3136 | 0.06  | 0.98  | 1.71  | 0.28  | 0.58  | 0.58  | 0.68  | 0.68  | 2.75  | 2.70  | 1.20  | 4.28 |
| LOC401335 | 401335 | NM_01123065 | 3137 | 1.35  | -0.23 | 0.13  | -0.65 | -0.80 | -0.81 | 3.07  | 0.16  | 1.06  | 1.25  | -2.26 | 4.28 |
| YOMM34    | 10953  | NM_006809   | 3138 | 1.11  | 0.66  | 1.31  | -0.77 | 0.07  | -0.57 | 1.94  | 0.69  | 1.65  | 3.07  | -1.27 | 4.28 |
| RHNDL4    | 36294  | NM_019128   | 3139 | 1.25  | 1.38  | 1.63  | 1.02  | 0.82  | 1.00  | 1.40  | 2.10  | 1.62  | 6.47  | 2.21  | 4.28 |
| APB1      | 162    | NM_145730   | 3140 | -0.40 | 0.21  | 0.40  | -1.65 | -1.49 | -1.11 | 2.10  | 1.16  | 1.02  | 0.21  | -4.25 | 4.28 |
| HCAP-G    | 64151  | NM_022346   | 3141 | -1.16 | -0.29 | 0.46  | -0.68 | -0.69 | -1.26 | 0.82  | 1.12  | 2.34  | 0.01  | -2.62 | 4.28 |
| LOC202139 | 9271   | NM_043739   | 3142 | 4.83  | 3.25  | 0.66  | 0.25  | 0.12  | 0.52  | 1.47  | 1.83  | 1.62  | 8.63  | 1.07  | 4.28 |
| TBC1D15   | 64786  | NM_022771   | 3143 | 1.61  | 1.51  | 0.72  | 1.04  | 1.91  | 0.68  | 2.39  | 0.23  | 1.66  | 3.84  | 3.63  | 4.28 |
| CHP1      | 11261  | NM_007236   | 3144 | 0.62  | 1.95  | 0.63  | -0.70 | 0.25  | -0.06 | 1.53  | 2.08  | 0.67  | 3.20  | -0.51 | 4.28 |
| CCL1      | 6340   | NM_021206   | 3145 | 1.09  | 0.28  | 1.38  | -0.97 | -0.76 | -0.75 | 1.17  | 1.12  | 1.98  | 2.75  | -4.48 | 4.27 |
| LOC3      | 20319  | NM_139278   | 3146 | 1.32  | 0.04  | 0.94  | -1.32 | -0.33 | -0.17 | 1.29  | 1.17  | 1.29  | 4.29  | -1.52 | 4.27 |
| MGCS139   | 84747  | NM_01080533 | 3147 | 1.69  | 1.30  | 0.58  | -0.44 | -0.30 | -0.63 | 1.80  | 1.18  | 1.29  | 3.57  | -1.37 | 4.27 |
| CYTORF36  | 57002  | NM_020192   | 3148 | 0.32  | -0.02 | -0.07 | -1.15 | -1.51 | -1.55 | 1.49  | 1.48  | 1.30  | 0.23  | -4.22 | 4.27 |
| HIFA      | 391    | NM_012954   | 3149 | 1.21  | 0.47  | 1.01  | -0.09 | -0.96 | -0.96 | 2.69  | 0.96  | 1.21  | 1.66  | 0.84  | 3.96 |
| DFPC-1    | 221120 | NM_139178   | 3150 | 0.99  | 1.53  | 0.69  | -0.73 | -0.59 | -0.60 | 0.73  | 2.50  | 1.04  | 2.31  | -1.92 | 4.27 |
| FLJ12024  | 158588 | NM_174912   |      |       |       |       |       |       |       |       |       |       |       |       |      |

|             |        |              |      |       |       |       |       |       |       |       |       |      |       |       |      |
|-------------|--------|--------------|------|-------|-------|-------|-------|-------|-------|-------|-------|------|-------|-------|------|
| PCDH45      | 56143  | NM_0191501   | 3233 | -0.10 | 1.28  | -0.13 | -0.82 | -1.02 | -1.03 | 0.67  | 2.72  | 0.77 | 1.05  | -2.87 | 4.16 |
| FL13855     | 7985   | NM_0191501   | 3233 | -0.22 | 0.83  | -0.03 | -0.47 | -0.88 | -0.88 | 0.32  | 2.45  | 0.99 | 1.14  | -1.27 | 4.58 |
| FXD2        | 486    | NM_001680    | 3235 | 0.34  | 0.66  | 1.43  | 0.10  | 1.34  | 0.77  | 1.58  | 1.51  | 1.07 | 2.43  | 2.21  | 4.16 |
| NU172       | 10204  | NM_005796    | 3236 | -0.51 | -0.38 | 1.47  | -1.17 | -1.03 | -1.29 | -0.21 | 0.77  | 3.59 | 0.58  | -3.49 | 4.16 |
| GLP1F2      | 51280  | NM_177377    | 3237 | 0.30  | 0.63  | 0.01  | -0.97 | -0.97 | -1.39 | 1.16  | 2.44  | 0.56 | 0.94  | -3.11 | 4.16 |
| HOD3        | 323    | NM_024501    | 3238 | 0.52  | 0.95  | 0.03  | -0.38 | -0.38 | -0.48 | 1.11  | 0.65  | 2.48 | 1.49  | 4.73  | 4.16 |
| FL12662     | 79887  | NM_024829    | 3239 | 0.78  | 0.58  | 0.53  | -0.28 | -0.97 | -0.37 | 0.65  | 1.72  | 1.78 | 1.90  | -1.61 | 4.15 |
| TRPC3       | 7222   | NM_003305    | 3240 | 0.18  | 1.32  | -0.01 | -1.50 | -0.86 | -0.62 | 1.92  | 1.39  | 0.85 | 1.48  | -2.99 | 4.15 |
| LOC383778   | 38778  | NM_020078    | 3241 | 0.01  | 0.46  | 0.06  | -0.67 | -0.67 | -0.89 | 0.49  | 0.89  | 0.62 | 1.53  | 2.20  | 4.15 |
| ARH1        | 51601  | NM_145199    | 3242 | 0.60  | 0.44  | 0.63  | -0.73 | -0.58 | -0.73 | 1.01  | 1.16  | 1.98 | 1.67  | -2.04 | 4.15 |
| AQP2        | 25820  | NM_005744    | 3243 | 0.30  | 0.41  | 1.50  | 0.10  | 0.18  | -0.31 | 0.74  | 0.37  | 3.04 | 1.90  | -0.03 | 4.15 |
| ZNF537      | 57616  | NM_020856    | 3245 | 1.02  | 0.68  | 3.11  | -0.18 | -0.73 | -0.76 | 0.83  | 0.60  | 2.70 | 5.30  | 1.73  | 4.15 |
| PTM5        | 5763   | NM_020824    | 3246 | 0.23  | 0.24  | 0.28  | -0.00 | -0.96 | -1.01 | 2.04  | 0.87  | 1.23 | 0.76  | -2.87 | 4.14 |
| TBC1D7      | 51256  | NM_016495    | 3247 | 0.46  | 0.90  | 0.33  | -0.54 | -0.73 | -1.14 | 2.20  | 1.19  | 0.75 | 1.49  | -2.41 | 4.14 |
| PC1         | 20634  | NM_152001    | 3248 | 0.31  | 0.68  | 0.02  | -0.54 | -1.21 | -0.52 | 2.21  | 1.38  | 0.55 | 1.01  | -2.27 | 4.14 |
| FL13273     | 79807  | NM_00101720  | 3249 | 2.43  | 1.50  | 2.51  | 0.50  | 0.67  | 0.37  | 1.61  | 0.85  | 1.69 | 6.44  | 1.54  | 4.14 |
| COR222      | 170693 | NM_152632    | 3250 | -0.13 | 0.62  | 2.39  | -0.46 | -0.67 | 0.13  | 0.77  | 1.58  | 1.79 | 2.87  | -1.00 | 4.14 |
| PT1         | 5538   | NM_000310    | 3251 | 1.46  | 2.35  | 0.79  | 0.11  | -0.36 | 0.54  | 1.42  | 2.59  | 0.13 | 4.60  | 0.29  | 4.14 |
| AAT1        | 88976  | NM_033364    | 3252 | 0.21  | -0.26 | 0.15  | -0.95 | -0.89 | -0.56 | 2.53  | 0.83  | 0.77 | 1.10  | -2.40 | 4.14 |
| GABRB3      | 2562   | NM_021912    | 3253 | -0.16 | -0.06 | -0.68 | -1.35 | -1.48 | -1.26 | 1.91  | 1.89  | 0.34 | -0.89 | -4.08 | 4.14 |
| C10orf63    | 21670  | NM_145010    | 3254 | 0.70  | 1.68  | 0.19  | -0.20 | -0.29 | -0.27 | 2.03  | 1.69  | 0.42 | 2.58  | -0.76 | 4.13 |
| LOC128954   | 128954 | NM_001037814 | 3255 | 1.18  | 1.37  | 0.40  | -0.52 | -0.96 | -1.10 | 1.34  | 1.61  | 1.19 | 2.96  | -2.58 | 4.13 |
| PCDH8       | 56127  | NM_019119    | 3256 | 3.33  | 3.09  | 1.52  | 0.03  | -0.36 | 0.32  | 1.98  | 1.54  | 0.62 | 7.94  | -0.10 | 4.13 |
| OHY1        | 89132  | NM_00105189  | 3257 | 2.31  | 2.24  | 2.13  | 0.42  | 0.52  | -0.22 | 1.53  | 0.88  | 1.72 | 6.67  | 0.71  | 4.13 |
| RALGAP3     | 57552  | NM_020792    | 3258 | 0.46  | 0.61  | 0.16  | -0.93 | -1.06 | -1.13 | 0.86  | 2.31  | 0.96 | 1.53  | -3.12 | 4.13 |
| PITPNM3     | 83394  | NM_031220    | 3259 | 0.74  | 0.54  | 0.50  | -1.47 | -1.13 | -0.86 | 2.01  | 1.41  | 0.71 | 1.78  | -3.46 | 4.13 |
| PM2D2       | 5708   | NM_020808    | 3260 | -1.04 | -1.30 | -1.24 | -2.44 | -2.79 | -2.83 | 0.75  | 2.24  | 1.14 | -3.58 | -8.06 | 4.13 |
| SLIT3       | 53175  | NM_190238    | 3261 | 0.45  | 0.63  | 0.38  | -0.55 | -1.97 | -1.78 | 1.20  | 0.59  | 0.68 | 1.77  | 1.67  | 4.13 |
| EL1RA       | 133396 | NM_139017    | 3262 | 0.60  | 0.15  | -0.35 | -0.48 | -0.57 | -0.78 | 1.58  | 1.50  | 1.05 | 0.41  | -1.84 | 4.13 |
| PRG2        | 79948  | NM_024888    | 3263 | 0.14  | 0.19  | 0.11  | -1.60 | -0.84 | -1.44 | 1.29  | 0.94  | 1.90 | 0.17  | -3.88 | 4.13 |
| NARGC49     | 92879  | NM_130296    | 3264 | 11.29 | 27.49 | 21.50 | 0.87  | 4.24  | 6.79  | 0.50  | 1.80  | 0.81 | 60.28 | 15.84 | 4.13 |
| GOPC        | 57120  | NM_00101408  | 3265 | 1.41  | 0.99  | 0.65  | 0.21  | -0.29 | -0.77 | 1.11  | 1.19  | 1.82 | 3.05  | -0.84 | 4.13 |
| C10orf16    | 9887   | NM_014837    | 3266 | 1.54  | 4.40  | 2.85  | 0.89  | 0.71  | -0.25 | 0.41  | 2.25  | 1.47 | 8.79  | 1.36  | 4.12 |
| PPP2CA      | 55315  | NM_002715    | 3267 | 2.38  | 2.22  | 1.94  | 0.14  | -0.22 | 0.20  | 0.97  | 1.86  | 1.30 | 6.53  | 0.13  | 4.12 |
| MYR4        | 31793  | NM_178577    | 3268 | 0.90  | 1.37  | 0.03  | -0.20 | -1.27 | -1.07 | 1.27  | 1.02  | 2.24 | 2.24  | -2.86 | 4.12 |
| GALNS       | 2588   | NM_000512    | 3269 | 1.19  | 2.22  | -0.79 | -1.04 | -1.12 | -1.74 | 0.74  | 2.72  | 0.65 | 2.62  | -1.99 | 4.12 |
| FL12507     | 149840 | NM_152504    | 3270 | -0.48 | -0.03 | 0.22  | -0.14 | -1.19 | -0.73 | 0.34  | 1.69  | 2.09 | -0.29 | -2.96 | 4.12 |
| ORF1        | 8497   | NM_032028    | 3271 | -0.48 | 0.57  | 1.60  | -0.79 | -1.57 | -1.69 | 1.40  | 1.15  | 1.69 | 4.52  | 1.13  | 4.12 |
| ENR9A       | 1909   | NM_001957    | 3272 | 1.45  | 1.91  | 0.49  | -0.71 | -0.58 | -0.92 | 1.51  | 1.54  | 1.07 | 3.85  | -2.22 | 4.12 |
| HD-ALPHA    | 113457 | NM_080386    | 3273 | 0.57  | 0.00  | 0.66  | -1.21 | -0.23 | -0.57 | 2.71  | 0.38  | 1.02 | 1.23  | -2.00 | 4.12 |
| SLIT1B      | 5531   | NM_020219    | 3274 | 0.07  | 1.51  | 0.07  | -0.07 | -0.85 | -1.43 | 0.62  | 0.80  | 0.99 | 2.09  | -0.26 | 4.12 |
| C10orf5     | 51306  | NM_016603    | 3275 | 0.71  | 0.99  | 1.48  | -0.58 | -1.00 | -1.16 | 0.40  | 1.59  | 2.12 | 1.18  | -2.75 | 4.11 |
| OLAT        | 1737   | NM_001931    | 3276 | 0.66  | 0.54  | 0.44  | -1.09 | -0.89 | -0.83 | 1.51  | 1.49  | 1.11 | 1.64  | -2.81 | 4.11 |
| FL12025     | 55004  | NM_017907    | 3277 | 2.22  | 1.25  | 0.69  | -0.41 | -0.01 | -0.68 | 1.56  | 1.40  | 1.15 | 4.16  | -1.10 | 4.11 |
| PGC9        | 90780  | NM_138200    | 3278 | 1.51  | 1.21  | 1.28  | 1.50  | 1.21  | 0.60  | 0.84  | 1.21  | 0.80 | 8.00  | 0.80  | 4.11 |
| GGA3        | 23163  | NM_014001    | 3279 | 0.55  | 0.74  | 1.55  | -0.46 | -0.21 | -0.43 | 1.06  | 1.11  | 1.93 | 2.84  | -1.10 | 4.11 |
| TM6M9       | 26520  | NM_012460    | 3280 | 1.56  | -0.05 | 0.42  | -0.33 | -0.04 | -0.82 | 2.38  | 0.04  | 1.76 | 1.93  | -1.20 | 4.10 |
| TR4         | 744    | NM_032384    | 3281 | 0.70  | 0.65  | 0.20  | -0.67 | -0.67 | -0.67 | 1.37  | 0.65  | 0.20 | 1.68  | -3.01 | 4.10 |
| EXOC7       | 23205  | NM_015219    | 3282 | 0.14  | 0.82  | -0.07 | -1.30 | -0.85 | -0.88 | 1.13  | 1.13  | 1.84 | 0.89  | -0.33 | 4.10 |
| HE57        | 84667  | NM_032380    | 3283 | 0.35  | 1.07  | 0.87  | 1.11  | 0.88  | -1.94 | 0.00  | 0.67  | 3.42 | 2.29  | 0.05  | 4.10 |
| SEP1        | 5688   | NM_020189    | 3284 | 2.75  | 1.62  | 1.61  | 0.84  | -0.24 | -0.85 | 0.45  | 1.48  | 0.62 | 5.00  | -0.25 | 4.10 |
| ETP2        | 55752  | NM_018243    | 3285 | 6.17  | 3.27  | 2.83  | 2.29  | 1.31  | 2.58  | 2.82  | 0.88  | 0.39 | 12.27 | 6.18  | 4.09 |
| C10orf35    | 219738 | NM_145306    | 3286 | -0.87 | 1.08  | 0.04  | -0.79 | -1.11 | -0.92 | 0.08  | 1.30  | 0.91 | 0.24  | -2.83 | 4.09 |
| LOC834275   | 65275  | NM_00179530  | 3287 | 0.43  | 0.45  | -0.29 | -0.99 | -0.34 | -1.08 | 1.59  | 1.75  | 0.75 | 0.59  | -4.22 | 4.09 |
| OR1         | 54749  | NM_019249    | 3288 | -0.54 | 0.34  | 0.13  | -1.70 | -2.07 | -0.60 | 0.66  | 0.59  | 0.26 | -1.01 | -2.31 | 4.09 |
| UR1QL2      | 29978  | NM_013444    | 3289 | 0.06  | 1.16  | 3.77  | -0.63 | -0.23 | -0.12 | 0.72  | 1.03  | 2.34 | 0.48  | -0.98 | 4.09 |
| UVRAG       | 7405   | NM_003169    | 3290 | 0.49  | -0.33 | 0.01  | -1.36 | -1.68 | -1.37 | 1.47  | 1.78  | 0.84 | 0.17  | -4.41 | 4.09 |
| NU17L1      | 5414   | NM_001616    | 3291 | 1.79  | 1.76  | 1.65  | 0.45  | 0.30  | 0.65  | 2.23  | 1.45  | 1.56 | 5.20  | 1.23  | 4.08 |
| DKFZ7618151 | 84248  | NM_032288    | 3292 | 0.36  | 0.05  | 0.74  | -0.76 | -1.01 | -0.90 | 0.83  | 1.25  | 2.00 | 1.05  | -2.68 | 4.08 |
| BMSC-UBP    | 84993  | NM_201265    | 3293 | 1.79  | 1.39  | 1.82  | -0.63 | -0.23 | 0.04  | 1.73  | 1.21  | 1.14 | 5.00  | -0.82 | 4.08 |
| PRF2        | 2856   | NM_002585    | 3294 | 0.20  | 0.83  | 0.29  | -1.13 | -0.83 | -0.40 | 2.80  | 0.93  | 0.80 | 0.81  | -1.27 | 4.08 |
| PLD3        | 113026 | NM_133373    | 3295 | 1.00  | 0.83  | -1.44 | -2.19 | -2.13 | -2.00 | 1.36  | 1.67  | 1.05 | -3.27 | -6.32 | 4.08 |
| GALNT11     | 63917  | NM_022087    | 3296 | 2.33  | 1.07  | 1.34  | 0.03  | -1.17 | -0.03 | 1.91  | 1.41  | 0.76 | 4.74  | -1.17 | 4.08 |
| LOC28       | 123355 | NM_144598    | 3299 | 0.19  | 0.30  | 1.12  | -1.51 | -0.58 | -1.13 | 1.99  | 0.77  | 1.31 | 1.61  | -3.23 | 4.07 |
| VCPB1       | 8027   | NM_032054    | 3300 | 0.39  | 1.59  | 1.67  | -0.79 | -0.79 | -0.79 | 1.49  | 1.49  | 1.49 | 2.64  | -2.10 | 4.07 |
| RNF121      | 55298  | NM_194452    | 3301 | 4.89  | 0.33  | 12.73 | -0.43 | 1.14  | 1.06  | 1.58  | -0.23 | 2.72 | 17.95 | 1.77  | 4.07 |
| ZPR6        | 5031   | NM_176797    | 3302 | 0.53  | 0.98  | 0.39  | 0.01  | -0.53 | -1.30 | 1.05  | 1.44  | 1.58 | 1.90  | -1.82 | 4.07 |
| LOC52710    | 15038  | NM_052150    | 3303 | 1.17  | 0.12  | 0.22  | -0.19 | -0.52 | -1.19 | 0.62  | 0.80  | 0.73 | 0.73  | 0.27  | 4.07 |
| CSPG3       | 1463   | NM_004386    | 3304 | 0.63  | 1.47  | -0.20 | -0.11 | -0.59 | -0.24 | 0.71  | 2.87  | 0.48 | 1.89  | -0.94 | 4.07 |
| LOC39726    | 399726 | NM_001019911 | 3305 | 1.39  | 0.93  | 1.22  | 0.36  | 0.42  | -0.38 | 0.98  | 0.15  | 2.94 | 3.54  | 0.41  | 4.06 |
| NALADL1     | 10084  | NM_001680    | 3306 | 0.05  | 0.24  | 0.72  | 0.34  | 2.07  | 0.33  | 1.14  | 1.25  | 1.91 | 1.91  | -1.22 | 4.06 |
| NBS4        | 585    | NM_033028    | 3307 | 1.29  | 0.31  | 1.11  | -0.25 | -0.51 | -0.55 | 2.65  | 0.96  | 0.45 | 1.71  | -1.32 | 4.06 |
| COR9F9      | 158427 | NM_139246    | 3308 | 0.66  | 2.46  | 1.02  | -0.23 | 0.24  | -0.73 | 1.71  | 1.65  | 1.70 | 4.14  | -0.72 | 4.06 |
| SUCRA1      | 30061  | NM_013885    | 3309 | 1.89  | 1.37  | 1.76  | -0.59 | 0.30  | -0.93 | 1.45  | 0.69  | 1.91 | 4.81  | -0.82 | 4.06 |
| RYL1        | 47     | NM_198830    | 3310 | 0.61  | 0.73  | 0.66  | -1.53 | -1.53 | -1.53 | 1.12  | 0.64  | 1.30 | 0.79  | -0.29 | 4.06 |
| OLFM2       | 93145  | NM_058164    | 3310 | 2.55  | 1.09  | 1.76  | -0.95 | -0.55 | -0.42 | 1.91  | 0.83  | 1.31 | 5.41  | -1.93 | 4.06 |
| MC27B81     | 115024 | NM_052935    | 3311 | 0.86  | 0.60  | 0.98  | -0.65 | -0.77 | -0.57 | 1.47  | 1.39  | 1.19 | 2.45  | -1.99 | 4.05 |
| LOC28598    | 26580  | NM_021722    | 3311 | 0.41  | 0.14  | 1.14  | -0.11 | -0.12 | -0.12 | 1.17  | 0.82  | 1.17 | 1.45  | -1.68 | 4.05 |
| TCF3        | 6929   | NM_003200    | 3312 | -1.24 | -0.66 | -1.19 | -2.18 | -1.97 | -1.88 | 0.64  | 1.30  | 2.08 | -3.09 | -6.03 | 4.05 |
| LOC120160   | 54842  | NM_017694    | 3313 | 1.24  | 0.87  | 1.54  | 0.11  | -0.61 | -0.48 | 0.84  | 1.77  | 1.44 | 3.66  | -0.98 | 4.05 |
| RNF39       | 51288  | NM_016580    |      |       |       |       |       |       |       |       |       |      |       |       |      |

|           |        |              |        |       |       |       |       |       |       |       |       |       |       |       |      |
|-----------|--------|--------------|--------|-------|-------|-------|-------|-------|-------|-------|-------|-------|-------|-------|------|
| CKK7      | 51795  | NM_016507    | 3395   | -0.64 | -0.01 | -0.88 | -1.98 | -1.58 | -1.71 | 2.00  | 1.50  | 0.45  | -1.54 | -5.27 | 3.95 |
| 4L0RFD10  | 5891   | NM_016507    | 3396   | -0.63 | 0.05  | 2.05  | -0.43 | -0.63 | -0.97 | 1.45  | 0.09  | 2.41  | -0.27 | -1.61 | 3.95 |
| S0BCAG84  | 51614  | NM_015966    | 3397   | -0.24 | 0.53  | 1.20  | 0.72  | -0.26 | -0.52 | -0.19 | 1.38  | 2.76  | 1.50  | 0.06  | 3.95 |
| GEMN4     | 50528  | NM_015721    | 3398   | -0.01 | 0.17  | 0.46  | -0.59 | -0.72 | -0.96 | 0.04  | 1.06  | 2.85  | 0.62  | -2.28 | 3.95 |
| PAX4      | 5078   | NM_006199    | 3399   | 1.32  | 2.43  | 1.59  | -0.50 | -0.36 | -0.26 | 0.93  | 1.62  | 1.40  | 5.34  | -0.92 | 3.95 |
| 100R3     | 100R3  | NM_002711    | 3400   | 1.99  | 2.38  | 1.59  | -0.28 | -0.28 | -0.28 | 1.58  | 2.14  | 0.58  | 4.99  | -0.38 | 3.95 |
| PCDH11X   | 27328  | NM_014522    | 3401   | 2.61  | 4.03  | 1.26  | -0.57 | 0.34  | 0.17  | 1.71  | 1.92  | 0.32  | 7.90  | -0.07 | 3.95 |
| ST3K28    | 55351  | NM_018401    | 3402   | 0.90  | 1.12  | 0.78  | -0.72 | -0.45 | -0.61 | 1.08  | 1.25  | 1.61  | 2.80  | -1.78 | 3.94 |
| RF11      | 613    | NM_000075    | 3403   | 1.12  | 1.17  | 1.68  | -1.22 | -1.17 | -1.68 | 1.04  | 1.01  | 1.84  | 1.57  | -1.71 | 3.94 |
| GFPT2     | 9945   | NM_005110    | 3404   | 1.17  | 0.20  | 0.16  | -1.27 | -0.55 | -0.54 | 2.86  | 0.16  | 0.92  | 1.53  | -2.36 | 3.94 |
| AMIG03    | 386724 | NM_198722    | 3405   | 1.76  | 1.37  | 0.93  | 0.81  | 0.51  | 1.34  | 0.93  | 2.58  | 0.43  | 4.06  | 2.68  | 3.94 |
| LC20R346  | 13945  | NM_004346    | 3406   | 1.82  | 0.57  | 0.59  | 1.82  | 0.57  | 0.59  | 1.82  | 0.57  | 0.59  | 1.82  | 0.57  | 3.94 |
| C200R10   | 27296  | NM_014477    | 3407   | 0.96  | 1.32  | 0.98  | 0.70  | 0.64  | 0.02  | -0.07 | 2.34  | 1.67  | 2.75  | 0.09  | 3.94 |
| ORS186    | 390058 | NM_001004750 | 3408   | -0.10 | 0.18  | 0.83  | -1.34 | -0.69 | -0.41 | 0.90  | 0.72  | 2.32  | 0.92  | -2.44 | 3.94 |
| CHD11     | 9557   | NM_004284    | 3409   | 2.96  | 3.50  | 2.25  | 1.09  | 0.87  | -0.13 | 0.61  | 2.72  | 0.61  | 8.72  | 1.85  | 3.94 |
| AJH1      | 548    | NM_0010268   | 3410   | 2.76  | 1.65  | 1.42  | 1.46  | 0.83  | 1.13  | 2.01  | 1.53  | 0.40  | 5.82  | 3.46  | 3.94 |
| LCR38927  | 38927  | NM_001008483 | 3411   | 8.32  | 6.89  | 3.87  | 2.28  | 2.86  | 3.95  | 2.65  | 1.36  | -0.07 | 18.09 | 9.09  | 3.94 |
| HUNK      | 30811  | NM_014586    | 3412   | 1.95  | 1.75  | 0.85  | 0.13  | 0.20  | 0.00  | 1.63  | 1.23  | 1.08  | 4.55  | 3.39  | 3.94 |
| GALM      | 130558 | NM_139801    | 3413   | -0.10 | 0.03  | 0.50  | -0.30 | -1.05 | -0.91 | 0.49  | 1.02  | 2.43  | 0.43  | 2.27  | 3.94 |
| MGC2494   | 65990  | NM_023933    | 3414   | -0.67 | -0.55 | 0.72  | -1.45 | -1.66 | -1.42 | 0.59  | 0.53  | 2.82  | -0.50 | -4.53 | 3.94 |
| NE5G1     | 25790  | NM_012337    | 3415   | -0.31 | 2.63  | 2.63  | 0.71  | 0.50  | 0.49  | -0.42 | 3.44  | 0.92  | 4.96  | 1.70  | 3.94 |
| LC20R065  | 90836  | NM_144567    | 3416   | 0.84  | 1.00  | 0.79  | -0.37 | -1.00 | -0.79 | 0.56  | 1.77  | 1.21  | 2.73  | -2.16 | 3.93 |
| KAA1712   | 80817  | NM_001040157 | 3417   | 1.74  | 2.24  | 1.14  | 0.10  | -0.65 | -0.66 | 0.74  | 0.87  | 2.32  | 3.11  | -1.21 | 3.93 |
| FLJ3790   | 282312 | NM_001039548 | 3418   | 1.03  | 0.42  | -0.01 | 0.54  | 0.95  | 1.25  | 3.41  | 1.22  | -0.69 | 1.43  | 2.74  | 3.93 |
| PPP2R4    | 5524   | NM_178003    | 3419   | -0.26 | 0.18  | -0.79 | -1.00 | -1.40 | -0.88 | 2.18  | 1.36  | 0.39  | -0.87 | -1.29 | 3.93 |
| ATPS      | 22909  | NM_0010268   | 3420   | 1.47  | 1.14  | 0.65  | -1.03 | 0.10  | 0.36  | 2.89  | 0.27  | 0.76  | 3.25  | -0.58 | 3.93 |
| LOC441476 | 441476 | NM_001004353 | 3421   | 0.19  | 0.72  | 0.53  | -0.07 | -0.37 | -0.90 | 0.58  | 1.44  | 1.91  | 1.43  | -1.20 | 3.93 |
| AMGPTL5   | 25395  | NM_178127    | 3422   | -0.82 | 0.24  | 1.52  | 0.59  | 0.10  | -0.83 | -0.72 | 0.75  | 3.89  | 0.95  | -0.13 | 3.93 |
| MTW8      | 463    | NM_023472    | 3423   | 2.65  | 1.16  | 1.64  | -1.24 | 1.66  | 1.16  | 1.24  | 1.66  | 1.24  | 5.46  | 2.02  | 3.93 |
| LOC29142  | 90523  | NM_138569    | 3424   | 0.80  | 0.91  | -0.15 | -0.45 | 0.04  | -0.11 | 1.45  | 2.25  | 0.22  | 1.56  | -0.30 | 3.92 |
| F2D2      | 2535   | NM_001466    | 3425   | -0.39 | -0.50 | -0.37 | -1.72 | -1.16 | -1.26 | 1.62  | 1.04  | 1.26  | -1.26 | -1.44 | 3.92 |
| ZFR11     | 2326   | NM_023110    | 3426   | -0.35 | -0.19 | 0.12  | -1.35 | -1.42 | -2.03 | -1.35 | -1.42 | -2.03 | -1.35 | -1.42 | 3.92 |
| SYCN      | 34288  | NM_194666    | 3427   | 0.19  | 0.74  | -0.14 | -1.42 | -0.97 | -0.22 | 1.30  | 2.28  | 0.34  | 4.43  | -2.61 | 3.92 |
| LMAN2     | 10960  | NM_006816    | 3428   | 0.41  | 0.86  | -0.38 | -0.24 | -0.65 | -0.38 | 0.57  | 2.73  | 0.62  | 0.90  | -1.27 | 3.92 |
| EDGA      | 9170   | NM_004720    | 3429   | 1.06  | 0.63  | 0.47  | -0.98 | -0.52 | -1.19 | 1.69  | 0.96  | 1.27  | 2.17  | -3.08 | 3.92 |
| IG2P      | 9092   | NM_171997    | 3430   | 1.93  | 1.20  | 0.86  | -1.02 | -0.06 | -0.84 | 1.86  | 0.34  | 0.62  | 3.19  | 1.11  | 3.92 |
| HXB9      | 3110   | NM_005515    | 3431   | 3.06  | 2.42  | 2.29  | 1.36  | 2.12  | 2.32  | 1.05  | 0.53  | 2.34  | 7.77  | 5.80  | 3.91 |
| C11ORF33  | 54827  | NM_017678    | 3432   | 0.66  | 1.70  | 1.20  | 0.39  | -0.37 | -0.50 | 1.41  | 1.09  | 1.41  | 3.37  | -0.48 | 3.91 |
| KAA1449   | 5759   | NM_0010268   | 3433   | 0.78  | 0.21  | 1.04  | -1.08 | -0.73 | -0.82 | 1.08  | 0.73  | -0.82 | 1.08  | -0.73 | 3.91 |
| RA1       | 10743  | NM_030665    | 3434   | 1.67  | 0.86  | 0.83  | -1.16 | -0.90 | -0.23 | 2.30  | 1.24  | 0.37  | 3.36  | -2.29 | 3.91 |
| RK8       | 225489 | NM_139021    | 3435   | 0.59  | 0.87  | 0.57  | -0.99 | -0.70 | -0.89 | 0.70  | 1.89  | 1.32  | 2.03  | -2.58 | 3.91 |
| RF2       | 7347   | NM_031425    | 3436   | 1.90  | 1.63  | 1.35  | 0.66  | 1.14  | 0.60  | 1.14  | 0.60  | 1.14  | 4.91  | 0.71  | 3.90 |
| ZNF34     | 80778  | NM_030580    | 3437   | -1.09 | -0.50 | -1.19 | -1.86 | -1.61 | -1.55 | 0.67  | 3.43  | 0.20  | -2.78 | -5.02 | 3.91 |
| COP56     | 10980  | NM_006833    | 3438   | 1.68  | 2.36  | 0.32  | 0.23  | 0.76  | 0.03  | 0.97  | 2.44  | 0.49  | 4.36  | 1.02  | 3.90 |
| FLJ2310   | 126264 | NM_152386    | 3439   | -0.74 | 0.85  | -0.19 | -0.77 | -0.82 | -1.26 | 0.17  | 2.24  | 1.50  | -0.08 | -1.85 | 3.90 |
| NUPR5     | 468    | NM_002484    | 3440   | 0.94  | 0.02  | 0.19  | 0.34  | 0.04  | -0.21 | 0.63  | 0.64  | 0.34  | 1.31  | 0.33  | 3.90 |
| LOC16311  | 28316  | NM_174941    | 3441   | 2.03  | 1.87  | 1.52  | 0.75  | 0.03  | 0.39  | 0.62  | 2.34  | 1.05  | 5.42  | 1.17  | 3.90 |
| KPOT      | 11260  | NM_007235    | 3442   | -0.27 | 1.16  | 1.07  | -0.27 | -0.63 | -0.46 | 0.29  | 1.98  | 1.63  | 1.96  | -1.36 | 3.90 |
| MRK9      | 565    | NM_001752    | 3443   | 1.22  | 1.29  | 1.22  | -0.42 | -0.55 | -0.47 | 1.22  | 1.29  | 1.22  | 1.83  | 1.65  | 3.90 |
| CHD4      | 1108   | NM_001273    | 3444   | 0.29  | -0.09 | 0.06  | -1.19 | -1.43 | -1.41 | 1.25  | 1.63  | 1.01  | 0.26  | -0.43 | 3.90 |
| ELL       | 8178   | NM_006532    | 3445   | -0.75 | -0.53 | -0.45 | -1.95 | -2.15 | -1.94 | 1.06  | 1.19  | 1.65  | -1.72 | -6.04 | 3.90 |
| MTWR      | 4524   | NM_004567    | 3446   | 1.24  | 0.60  | 2.66  | 0.60  | 1.14  | 0.60  | 1.14  | 0.60  | 2.66  | 0.60  | 1.14  | 3.90 |
| ZNF253    | 56242  | NM_021047    | 3447   | 0.15  | 0.22  | 1.10  | -1.44 | -1.31 | -0.52 | 1.25  | 1.32  | 1.32  | 1.47  | -3.27 | 3.90 |
| SEPPN811  | 89778  | NM_080475    | 3448   | -1.29 | -0.08 | 0.48  | -0.82 | -0.34 | -0.93 | 0.42  | 1.10  | 2.37  | 0.12  | -2.10 | 3.89 |
| NF        | 4860   | NM_000270    | 3449   | 0.85  | 0.42  | 1.37  | 0.81  | 1.28  | 0.59  | 1.24  | 1.88  | 0.77  | 6.63  | 2.68  | 3.89 |
| NEC2348   | 84516  | NM_032486    | 3450   | 0.49  | 0.26  | 1.39  | -0.75 | -0.69 | -0.97 | 1.80  | 0.62  | 1.96  | 1.95  | -0.48 | 3.89 |
| FLJ6008   | 339761 | NM_001001665 | 3451   | 1.09  | 1.49  | 2.75  | -0.15 | 0.87  | -0.56 | 1.13  | 1.50  | 1.92  | 5.32  | 0.16  | 3.89 |
| JRK       | 8629   | NM_003724    | 3452   | 0.88  | 0.13  | 0.54  | -1.05 | -0.75 | -0.90 | 2.23  | 0.74  | 0.92  | 1.54  | -2.70 | 3.89 |
| MSH5      | 5034   | NM_000918    | 3453   | 1.47  | 1.09  | 1.43  | 0.29  | 0.13  | -0.32 | 1.47  | 1.09  | 1.43  | 4.00  | 0.88  | 3.89 |
| LOC200373 | 200373 | NM_001029996 | 3454   | 1.49  | 0.22  | 0.82  | -0.57 | -1.08 | -0.68 | 1.75  | 0.93  | 1.20  | 2.53  | -2.34 | 3.88 |
| PG51      | 569    | NM_0010268   | 3455   | 0.79  | 0.65  | 0.52  | -1.01 | -1.05 | -1.26 | 1.41  | 1.78  | 1.69  | 1.96  | -3.32 | 3.88 |
| PGAS      | 5222   | NM_014224    | 3457   | 1.20  | 0.35  | -0.66 | -0.62 | -1.30 | -0.67 | 0.91  | 2.62  | 0.84  | 3.90  | -1.10 | 3.88 |
| CACNA1B   | 774    | NM_000718    | 3458   | 1.12  | 1.45  | 1.21  | -0.87 | 0.26  | 0.62  | 1.98  | 1.63  | 0.27  | 3.77  | 0.00  | 3.88 |
| RM6       | 10136  | NM_005777    | 3459   | 0.25  | 0.91  | 0.66  | -0.54 | -0.19 | -0.42 | 0.59  | 1.39  | 1.89  | 1.93  | -1.15 | 3.88 |
| LOC40522  | 2389   | NM_010575    | 3460   | 1.57  | 1.26  | 1.12  | -1.32 | -1.12 | -1.32 | 1.57  | 1.26  | 1.12  | 2.06  | -2.46 | 3.88 |
| LOC129138 | 129138 | NM_138979    | 3461   | -0.44 | 0.11  | -0.76 | -1.44 | -1.44 | -1.47 | 1.49  | 1.42  | 0.96  | -0.89 | -4.35 | 3.87 |
| C0XG61    | 1337   | NM_004793    | 3462   | 0.34  | -0.25 | -0.31 | -1.19 | -1.41 | -1.64 | 0.49  | 0.96  | 2.43  | -0.90 | -4.24 | 3.87 |
| OR6K5     | 39068  | NM_001005326 | 3463   | 2.15  | 2.24  | 1.45  | 0.86  | 0.61  | 0.61  | 2.08  | 1.66  | 1.66  | 6.85  | 1.25  | 3.87 |
| RFP11     | 5988   | NM_021026    | 3464   | 4.11  | 2.65  | 7.81  | -2.05 | -0.08 | -0.88 | 1.90  | -0.10 | 2.07  | 14.58 | -1.01 | 3.87 |
| CDR2      | 1039   | NM_001802    | 3465   | 2.38  | 0.13  | 2.40  | 0.37  | -1.44 | -0.57 | 0.82  | 0.54  | 2.51  | 4.91  | -1.64 | 3.87 |
| ZNF565    | 14749  | NM_001477    | 3466   | 1.96  | 0.40  | 2.05  | 0.60  | 0.37  | 0.46  | 2.06  | 0.17  | 0.46  | 4.41  | -0.70 | 3.87 |
| ANKRD17   | 26057  | NM_198889    | 3467   | 3.90  | 1.61  | 0.74  | 0.16  | -0.40 | 0.68  | 2.33  | 1.67  | 0.13  | 6.24  | 0.43  | 3.87 |
| CDORF22   | 130814 | NM_152391    | 3468   | 2.85  | 1.70  | 0.48  | -0.17 | 0.31  | -0.12 | 2.52  | 1.00  | 0.35  | 5.03  | 0.03  | 3.87 |
| ADPF      | 123    | NM_001122    | 3469   | 0.15  | -0.89 | -0.04 | -1.99 | -1.47 | -1.43 | 2.67  | 0.11  | 1.09  | -0.77 | -4.87 | 3.87 |
| ADG1      | 1405   | NM_004393    | 3470   | 1.45  | 1.86  | 1.86  | 0.51  | 0.68  | 0.68  | 1.72  | 0.68  | 1.17  | 4.17  | 2.79  | 3.87 |
| CD3D      | 915    | NM_000732    | 3471   | 3.64  | 5.38  | 1.94  | 0.91  | 1.88  | 1.77  | 1.66  | 2.15  | 0.06  | 10.95 | 4.56  | 3.87 |
| CD42BPB   | 95778  | NM_006035    | 3472   | 1.17  | 2.27  | 0.81  | -0.52 | -0.11 | -0.49 | 1.19  | 1.78  | 0.90  | 4.25  | -1.13 | 3.87 |
| MRN12     | 5576   | NM_124846    | 3473   | 0.06  | 1.23  | 1.89  | 0.16  | 0.12  | 0.12  | 2.62  | 1.69  | 1.42  | 4.38  | 1.95  | 3.87 |
| FANCC     | 2176   | NM_000136    | 3474   | 1.14  | 0.68  | 0.53  | -0.17 | -0.40 | -0.93 | 1.04  | 1.71  | 1.11  | 2.35  | -1.49 | 3.87 |
| FNK       | 56832  | NM_002124    | 3475   | 1.53  | 1.13  | -0.22 | -0.17 | -0.37 | -0.69 | 1.78  | 1.40  | 0.68  | 2.44  | -1.23 | 3.86 |
| PHACTR1   | 21669  | NM_030948    | 3476</ |       |       |       |       |       |       |       |       |       |       |       |      |

|             |        |              |      |       |       |       |       |       |       |       |       |      |       |       |      |
|-------------|--------|--------------|------|-------|-------|-------|-------|-------|-------|-------|-------|------|-------|-------|------|
| LOC340654   | 340654 | NM_0219663   | 3557 | 2.65  | 2.02  | 0.80  | -0.06 | -0.05 | -0.10 | 1.73  | 1.57  | 0.46 | 5.47  | -0.22 | 3.76 |
| AC098       | 8389   | NM_175861    | 3558 | 0.51  | 1.28  | 0.78  | -0.21 | -0.27 | -0.29 | 1.59  | 1.29  | 0.67 | 2.57  | -1.45 | 3.57 |
| ACTS        | 79913  | NM_02485     | 3559 | 0.07  | -0.17 | -0.78 | -1.55 | -1.33 | -1.18 | 3.27  | 0.85  | 0.36 | -1.08 | -4.06 | 3.76 |
| GNPNA1      | 64841  | NM_198066    | 3560 | 0.96  | 1.50  | 1.00  | 0.19  | -0.10 | 0.14  | 0.90  | 1.84  | 1.02 | 3.46  | 0.23  | 3.75 |
| HLAF        | 3134   | NM_018950    | 3561 | -1.16 | -0.42 | -0.18 | -1.75 | -2.04 | -2.11 | -0.28 | 1.56  | 2.48 | -1.77 | -5.91 | 3.75 |
| STAT5B      | 6177   | NM_024448    | 3562 | 1.80  | 1.11  | 0.87  | -1.80 | -0.21 | -1.69 | 0.81  | 1.23  | 0.55 | 2.55  | -0.89 | 3.75 |
| GCORF57     | 135254 | NM_145267    | 3563 | 2.54  | 2.29  | 2.11  | -0.27 | 0.04  | 0.20  | 1.20  | 1.37  | 1.17 | 7.04  | -0.02 | 3.75 |
| LOC339896   | 339896 | NM_207159    | 3564 | 1.48  | 0.82  | 0.75  | -0.58 | -0.43 | -0.63 | 1.39  | 1.30  | 1.06 | 3.04  | -1.63 | 3.75 |
| HLKDC       | 116138 | NM_057161    | 3565 | 1.27  | 1.41  | 1.22  | -0.44 | -0.44 | -0.44 | 0.59  | 1.63  | 1.09 | 3.00  | 1.21  | 3.75 |
| IFNA21      | 3452   | NM_002175    | 3566 | 4.73  | 1.95  | 3.04  | 0.62  | 1.10  | 0.81  | 1.55  | 0.75  | 1.44 | 9.72  | 2.53  | 3.74 |
| ETHE1       | 23474  | NM_014297    | 3567 | -0.63 | -1.28 | -0.00 | -2.26 | -2.17 | -1.67 | 1.80  | 0.44  | 1.50 | -2.81 | -6.10 | 3.74 |
| HLUNC       | 5137   | NM_056863    | 3568 | 4.04  | -0.24 | -0.47 | -0.56 | -0.73 | -2.08 | 1.73  | 0.97  | 1.68 | 1.46  | -1.08 | 3.74 |
| MGC13839    | 124975 | NM_152353    | 3569 | 0.33  | 1.19  | 0.03  | -1.01 | -1.00 | -0.84 | 0.47  | 2.18  | 1.09 | 0.89  | -2.85 | 3.74 |
| C10ORF53    | 282966 | NM_182554    | 3570 | 0.19  | -0.75 | -0.78 | -1.14 | -0.83 | -0.83 | 1.57  | -0.27 | 2.44 | 0.22  | -0.79 | 3.74 |
| ZBTB3       | 79842  | NM_024784    | 3571 | 1.31  | 2.42  | 2.01  | -0.10 | 0.00  | 0.13  | 0.47  | 1.79  | 1.49 | 5.74  | 0.01  | 3.74 |
| HL4800      | 84632  | NM_018940    | 3572 | 0.67  | -0.15 | 0.69  | -0.24 | -0.70 | -0.07 | 0.43  | 0.38  | 2.93 | 1.21  | -1.81 | 3.74 |
| OR6C6       | 283305 | NM_001005493 | 3573 | 0.96  | 3.05  | 2.64  | 1.43  | 0.98  | 0.46  | -0.21 | 2.61  | 1.33 | 6.65  | 2.87  | 3.74 |
| BNDF        | 627    | NM_170734    | 3574 | 1.86  | 0.78  | 0.42  | -0.06 | -0.13 | 0.00  | 1.88  | 1.63  | 0.22 | 3.06  | -0.20 | 3.74 |
| FLJ4397     | 84665  | NM_022779    | 3575 | 1.72  | -0.74 | 0.03  | -0.49 | 0.87  | -0.13 | 2.54  | -0.48 | 0.88 | 1.00  | 0.25  | 3.74 |
| JD2         | 122953 | NM_130469    | 3576 | 0.43  | 1.05  | 0.98  | -0.13 | -0.25 | -0.99 | 0.55  | 0.49  | 2.70 | 2.47  | -2.27 | 3.74 |
| FLJ4566     | 84892  | NM_032806    | 3577 | -0.82 | 2.08  | -0.57 | -2.68 | -0.68 | -1.65 | 1.75  | 1.40  | 0.58 | 0.69  | -5.02 | 3.73 |
| FLJ3840     | 79802  | NM_024746    | 3578 | 2.25  | 0.73  | 0.18  | 0.12  | 1.00  | 0.84  | 3.10  | 0.25  | 0.25 | 3.16  | 1.95  | 3.73 |
| KIAA1576    | 57687  | NM_020927    | 3579 | 1.43  | 1.30  | 1.00  | -0.10 | 0.16  | 0.38  | 2.59  | 0.82  | 0.33 | 5.73  | 0.44  | 3.73 |
| CUL4A       | 8451   | NM_003589    | 3580 | 1.81  | 2.28  | 1.00  | 0.37  | -0.35 | -0.57 | 0.71  | 1.93  | 1.09 | 5.08  | -0.55 | 3.73 |
| PDN1        | 5444   | NM_000446    | 3581 | -0.46 | -0.07 | 0.23  | -0.67 | -1.11 | -0.69 | 0.57  | 1.58  | 1.58 | -0.31 | -0.41 | 3.73 |
| PTPRZ       | 5778   | NM_080589    | 3582 | 2.47  | 2.11  | 0.59  | -0.13 | 0.24  | 0.26  | 1.47  | 1.62  | 0.64 | 5.17  | 0.37  | 3.73 |
| C19ORF10    | 56005  | NM_019107    | 3583 | 0.41  | 0.07  | 1.14  | 1.23  | -0.86 | -0.20 | 0.01  | 1.35  | 2.37 | 1.62  | 1.07  | 3.73 |
| SLC6A8      | 23539  | NM_013356    | 3584 | 0.29  | -0.11 | 0.08  | -0.34 | -0.52 | -0.60 | 2.00  | 0.92  | 0.80 | 0.26  | -1.46 | 3.73 |
| NSL4        | 364    | NM_021295    | 3585 | 1.10  | 1.20  | 1.30  | -1.10 | -1.20 | -1.30 | 1.91  | 1.20  | 1.63 | 1.62  | 1.03  | 3.73 |
| MART2       | 55733  | NM_018194    | 3586 | 2.19  | 2.16  | 1.41  | -0.18 | 0.73  | -0.53 | 1.47  | 0.69  | 1.57 | 5.76  | 0.39  | 3.73 |
| HST12B2     | 8339   | NM_003518    | 3587 | -0.11 | 0.65  | 0.84  | 0.97  | -0.09 | 0.93  | 0.87  | 2.03  | 0.83 | 1.38  | 1.81  | 3.72 |
| HSPZP762B22 | 5697   | NM_062225    | 3588 | 1.48  | 0.54  | 0.61  | -0.88 | -1.48 | -0.51 | 2.24  | 0.84  | 0.51 | 2.31  | -1.58 | 3.72 |
| CPS1        | 1373   | NM_001875    | 3589 | -0.66 | 0.87  | 0.58  | 1.10  | 0.32  | -1.47 | -0.82 | 0.85  | 5.40 | -0.95 | 0.05  | 3.72 |
| ZNF442      | 79973  | NM_030824    | 3590 | -0.38 | -0.33 | 1.83  | -1.40 | -0.94 | -1.25 | 0.06  | 1.19  | 2.47 | 1.12  | -3.59 | 3.72 |
| PDZK2       | 118987 | NM_173791    | 3591 | -0.41 | -0.46 | -0.48 | -1.46 | -1.13 | -0.19 | 1.77  | 1.90  | 0.05 | -1.35 | -2.78 | 3.72 |
| PCDCM2C4    | 56988  | NM_015740    | 3592 | 0.54  | 0.74  | 1.30  | -0.84 | -0.84 | -0.84 | 0.89  | 1.50  | 1.23 | 1.54  | 1.54  | 3.72 |
| GRP146      | 115330 | NM_138445    | 3593 | 1.38  | -0.36 | 0.42  | -1.21 | -1.83 | -0.90 | 2.18  | 0.79  | 0.75 | 1.44  | -3.94 | 3.72 |
| CASQ2       | 945    | NM_021232    | 3594 | 0.74  | 1.24  | 1.54  | -0.46 | -0.50 | -0.48 | 1.25  | 1.07  | 1.40 | 3.52  | -1.44 | 3.72 |
| TICB3B      | 5123   | NM_056427    | 3595 | 0.95  | -0.26 | 0.17  | -1.18 | -0.88 | -1.81 | 1.17  | 1.80  | 1.17 | 0.71  | 2.00  | 3.72 |
| OR6B1       | 135946 | NM_001005281 | 3596 | 2.02  | 0.76  | 0.19  | -0.32 | -0.30 | -0.44 | 3.21  | 1.19  | 0.32 | 2.96  | -1.07 | 3.72 |
| CMTNA1      | 8506   | NM_003632    | 3597 | -0.25 | -0.05 | -0.26 | -1.45 | -1.00 | -0.99 | 0.80  | 1.54  | 1.38 | -0.56 | -3.44 | 3.72 |
| FLJ22028    | 5569   | NM_021910    | 3598 | 2.21  | 0.21  | 1.36  | -0.67 | -0.66 | -0.66 | 1.47  | 1.46  | 1.39 | 3.47  | -2.00 | 3.71 |
| CUL5        | 8065   | NM_003478    | 3599 | 0.59  | 1.14  | 1.32  | 0.43  | -0.50 | -0.55 | -0.17 | 1.37  | 2.51 | 1.80  | -0.63 | 3.71 |
| ARX         | 170102 | NM_139058    | 3600 | 2.74  | 4.13  | 1.89  | 0.09  | 0.68  | 1.10  | 1.43  | 1.87  | 0.41 | 8.76  | 1.88  | 3.71 |
| BRAC2       | 6423   | NM_022157    | 3601 | -1.13 | 1.88  | -0.02 | -0.01 | -0.09 | -0.50 | -0.46 | 3.08  | 1.09 | 1.74  | -0.60 | 3.71 |
| BRD2        | 542    | NM_080230    | 3602 | 0.08  | 0.46  | 1.31  | 0.43  | 0.43  | 0.43  | 1.47  | 1.47  | 1.47 | 6.69  | 0.07  | 3.71 |
| CHODL       | 140578 | NM_024944    | 3603 | 2.42  | 1.06  | 1.45  | -0.07 | 0.48  | 0.19  | 2.27  | 2.56  | 0.89 | 4.93  | 0.73  | 3.71 |
| C12ORF32    | 147007 | NM_152464    | 3604 | 1.24  | 0.96  | 1.88  | -0.72 | -0.45 | 0.78  | 1.36  | 1.83  | 0.51 | 4.08  | -0.39 | 3.71 |
| BAG1L1      | 246    | NM_021497    | 3605 | 1.29  | 1.21  | 1.49  | -1.59 | -1.59 | -1.59 | 1.49  | 1.59  | 1.59 | 4.08  | -0.48 | 3.71 |
| FL1R        | 50848  | NM_144501    | 3606 | 0.68  | -0.20 | 0.59  | -1.02 | -0.66 | -0.90 | 1.63  | 0.32  | 1.75 | 1.07  | -2.59 | 3.71 |
| PHF1        | 5252   | NM_002636    | 3607 | 4.67  | 1.35  | 2.42  | -1.54 | -1.22 | -2.32 | 1.58  | 1.12  | 1.01 | 8.44  | -5.07 | 3.71 |
| SC5A8B      | 5889   | NM_037445    | 3608 | -0.40 | -0.24 | -0.24 | -0.67 | -0.68 | -0.68 | 0.67  | 0.67  | 0.67 | 1.67  | -1.41 | 3.70 |
| COL4        | 344387 | NM_001005965 | 3609 | 2.40  | 1.19  | 0.16  | -0.29 | -0.55 | -0.41 | 2.00  | 1.31  | 0.40 | 3.75  | -1.25 | 3.70 |
| DEFA1       | 1667   | NM_004084    | 3610 | 0.93  | 0.41  | 0.53  | -1.40 | -1.10 | -0.56 | 1.45  | 1.48  | 0.77 | 1.88  | -2.69 | 3.70 |
| APCM        | 55937  | NM_019101    | 3611 | -0.20 | 1.05  | 0.84  | 0.98  | 0.92  | 0.70  | -0.52 | 3.07  | 1.15 | 1.68  | -2.59 | 3.70 |
| HL2800      | 64932  | NM_022903    | 3612 | 0.19  | 0.43  | 0.44  | -1.32 | -1.28 | -1.28 | 1.32  | 1.20  | 1.10 | 0.10  | -1.38 | 3.70 |
| ZC3H3       | 23144  | NM_015117    | 3613 | -0.17 | 1.25  | -0.23 | -1.80 | 1.20  | -1.72 | 2.55  | -0.06 | 1.22 | 0.85  | -2.32 | 3.70 |
| DUSP19      | 142679 | NM_080876    | 3614 | 0.25  | 0.30  | 0.59  | -1.00 | -0.89 | -1.32 | 0.71  | 0.68  | 2.31 | 1.14  | -3.22 | 3.70 |
| DLG103      | 26496  | NM_00120345  | 3615 | 1.07  | 1.42  | 1.63  | -1.47 | -1.47 | -1.47 | 1.47  | 1.47  | 1.47 | 3.12  | -1.93 | 3.70 |
| DKFZ434P162 | 283768 | NM_01012420  | 3616 | 1.51  | 2.58  | 1.04  | 0.03  | -0.33 | -0.54 | 0.42  | 2.00  | 1.27 | 5.13  | -0.83 | 3.69 |
| ZNF268      | 10795  | NM_003415    | 3617 | 0.52  | 0.35  | 0.00  | -1.11 | -0.84 | -1.40 | 1.69  | 1.14  | 0.86 | 0.86  | -3.35 | 3.69 |
| NHE3        | 4837   | NM_002513    | 3618 | 0.56  | 1.04  | 1.04  | 0.78  | 0.56  | 0.35  | 1.56  | 1.56  | 1.56 | 3.64  | 2.66  | 3.69 |
| MS4AA       | 51338  | NM_148975    | 3619 | -0.11 | 0.59  | 0.65  | -1.14 | -1.13 | -0.69 | 0.80  | 1.67  | 1.22 | 1.13  | 2.66  | 3.69 |
| CMYA1       | 165904 | NM_194293    | 3620 | -0.04 | -0.20 | 0.50  | -0.92 | -0.57 | -1.35 | 0.75  | 0.66  | 2.28 | 0.26  | -2.84 | 3.69 |
| FLJ26254    | 127845 | NM_198447    | 3621 | -1.16 | 1.05  | 1.11  | -1.01 | -0.84 | -1.10 | 0.48  | 1.25  | 1.96 | 2.00  | -2.95 | 3.69 |
| C22ORF18    | 856    | NM_021939    | 3622 | 1.14  | 0.39  | 0.07  | -0.29 | -0.29 | -0.29 | 0.29  | 0.29  | 0.29 | 3.69  | 2.69  | 3.69 |
| RNF12       | 51332  | NM_016120    | 3623 | 0.95  | 0.99  | 1.46  | -0.01 | 0.02  | 0.00  | 0.98  | 1.59  | 1.11 | 3.41  | 0.00  | 3.68 |
| RP123       | 9349   | NM_000978    | 3624 | 0.19  | -1.55 | -0.72 | -2.16 | -2.09 | -2.40 | 2.96  | -0.48 | 1.20 | -2.09 | -6.65 | 3.68 |
| ZNFPL3      | 7259   | NM_003309    | 3625 | 0.42  | 1.19  | 1.03  | -0.55 | -0.55 | -0.55 | 1.65  | 1.65  | 1.65 | 3.59  | 1.63  | 3.68 |
| NUP153      | 9972   | NM_005124    | 3626 | 0.40  | 0.31  | 0.68  | -0.26 | -0.60 | -1.05 | 1.17  | 1.23  | 1.28 | 1.39  | -1.91 | 3.68 |
| MYO7B       | 4648   | NM_291001    | 3627 | 1.27  | 0.74  | 0.83  | -0.31 | -0.76 | -0.98 | 1.24  | 1.14  | 1.30 | 2.83  | -2.05 | 3.68 |
| ZBTB7       | 2387   | NM_020822    | 3628 | -0.08 | -0.22 | 0.76  | -1.19 | -0.88 | -1.19 | 0.88  | 1.19  | 1.19 | 0.88  | -1.19 | 3.68 |
| GFBR1       | 153306 | NM_170699    | 3629 | 1.14  | 0.55  | 0.36  | -0.63 | -1.46 | -1.17 | 0.26  | 2.73  | 0.68 | 0.06  | -3.25 | 3.68 |
| GCORF1      | 10658  | NM_006568    | 3630 | 1.19  | 1.21  | 9.44  | -1.63 | -0.64 | -1.05 | 0.73  | 0.63  | 2.31 | 12.83 | -1.22 | 3.67 |
| APHE1       | 23431  | NM_207347    | 3631 | 0.88  | 1.25  | 2.38  | 0.06  | -0.41 | -0.09 | 0.42  | 1.38  | 1.87 | 4.52  | -0.44 | 3.67 |
| ZKORF16     | 400616 | NM_213720    | 3632 | 3.26  | 1.20  | 1.52  | -0.57 | -1.80 | -1.57 | 1.80  | 1.72  | 0.98 | 8.96  | 0.11  | 3.67 |
| GRY5        | 1837   | NM_001916    | 3633 | 0.91  | 0.94  | 0.57  | -0.88 | -0.94 | -0.47 | 1.71  | 1.40  | 0.56 | 2.42  | -2.28 | 3.67 |
| CPC1        | 5677   | NM_003908    | 3634 | -0.51 | 1.72  | 0.33  | -0.91 | -0.93 | -0.33 | 1.07  | 2.44  | 0.16 | 1.55  | -2.17 | 3.67 |
| HMNA11      | 64802  | NM_021787    | 3635 | 1.70  | 0.79  | 0.19  | -0.62 | -0.45 | -0.62 | 2.18  | 0.62  | 1.45 | 4.07  | -1.40 | 3.67 |
| CANX        | 821    | NM_01024649  | 3636 | 1.42  | 0.67  | 1.72  | 0.54  | 0.10  | 0.18  | 0.22  | 2.15  | 1.30 | 3.82  | 0.83  | 3.67 |
| KLX5        | 25818  | NM_012427    |      |       |       |       |       |       |       |       |       |      |       |       |      |

|            |        |              |      |       |       |       |       |       |       |       |       |      |       |       |      |
|------------|--------|--------------|------|-------|-------|-------|-------|-------|-------|-------|-------|------|-------|-------|------|
| EPH411     | 2036   | NM_177996    | 3719 | 0.14  | 1.70  | 1.90  | -0.27 | -0.45 | -0.28 | 0.19  | 2.29  | 1.09 | 3.15  | -1.00 | 3.57 |
| EPH412     | 9889   | NM_012124    | 3720 | 1.05  | -0.18 | 0.90  | -0.42 | -1.25 | -1.38 | 1.52  | 0.89  | 1.76 | 1.60  | -1.27 | 3.05 |
| SARDH      | 1797   | NM_007101    | 3721 | 2.10  | 0.90  | 1.04  | -0.41 | -0.70 | 0.13  | 1.99  | 0.77  | 0.81 | 4.04  | -0.97 | 3.57 |
| MGC31963   | 112770 | NM_144580    | 3722 | -0.56 | 1.45  | 0.10  | -0.54 | -0.76 | -0.87 | 0.01  | 2.23  | 1.33 | 0.99  | -2.16 | 3.57 |
| MGC5528    | 79075  | NM_024994    | 3723 | 1.43  | 0.90  | 1.27  | 0.28  | 0.39  | -0.85 | 0.88  | 0.47  | 2.22 | 3.61  | -0.18 | 3.57 |
| FOA41      | 2348   | NM_037371    | 3724 | 0.94  | 0.94  | 1.62  | 0.30  | 0.78  | 0.44  | 0.71  | 1.30  | 1.20 | 1.79  | -0.29 | 3.56 |
| GORASP1    | 64889  | NM_031899    | 3725 | 1.42  | 1.84  | 1.84  | -0.31 | -0.30 | 0.78  | 0.80  | 2.13  | 0.63 | 5.09  | -0.17 | 3.56 |
| CS76       | 1474   | NM_001123    | 3726 | 1.24  | 2.19  | 1.79  | -0.20 | 0.19  | -0.03 | 1.17  | 1.17  | 1.22 | 5.21  | -0.04 | 3.56 |
| KMA1581    | 5749   | NM_017861    | 3727 | 1.80  | 0.41  | 1.31  | -0.40 | -0.31 | 0.23  | 2.43  | 1.31  | 0.22 | 4.06  | 0.25  | 3.56 |
| FLJ2022    | 54905  | NM_017861    | 3728 | 1.30  | 1.98  | 1.16  | -0.47 | -0.45 | 0.28  | 1.05  | 1.39  | 1.12 | 4.45  | -0.63 | 3.56 |
| SOCS5      | 9605   | NM_014011    | 3729 | -0.20 | 0.74  | 0.75  | 0.03  | -0.04 | -0.95 | 0.59  | 0.83  | 2.14 | 1.29  | -0.95 | 3.56 |
| 263        | 7947   | NM_013413    | 3730 | 0.42  | 0.51  | 0.55  | -0.07 | -0.14 | -0.60 | 1.04  | 1.09  | 1.43 | 1.98  | -0.41 | 3.56 |
| CL10RF107  | 54014  | NM_001007246 | 3731 | 1.13  | 0.27  | 0.85  | -0.44 | -0.67 | -0.35 | 1.94  | 0.10  | 1.52 | 1.71  | -1.46 | 3.56 |
| RG518      | 64407  | NM_130782    | 3732 | 2.01  | 2.23  | 1.33  | 2.08  | 0.87  | 0.34  | 0.98  | 1.24  | 1.34 | 5.58  | 3.28  | 3.56 |
| CAP2A3     | 93661  | NM_033328    | 3733 | 0.88  | -0.29 | 1.09  | 0.04  | -0.63 | -0.77 | 0.36  | 0.86  | 2.34 | 1.68  | -1.35 | 3.56 |
| FLJ2490    | 7984   | NM_004790    | 3734 | 0.76  | 1.42  | 0.16  | -0.41 | -0.80 | -0.51 | 0.78  | 2.12  | 0.66 | 2.34  | -2.13 | 3.56 |
| FLJ20399   | 54920  | NM_017803    | 3735 | 1.38  | 0.13  | 1.30  | -1.05 | -1.07 | -0.93 | 1.83  | 0.40  | 1.33 | 2.80  | -3.06 | 3.56 |
| CS298      | 1439   | NM_000395    | 3736 | 1.02  | 1.68  | 0.98  | 0.00  | -0.13 | -0.51 | 0.31  | 2.14  | 1.11 | 3.68  | -0.64 | 3.56 |
| LOC151506  | 155006 | NM_001085429 | 3737 | 3.09  | 0.59  | 0.51  | -0.04 | 1.08  | -0.52 | 2.59  | -0.10 | 1.07 | 4.18  | 0.51  | 3.56 |
| FBL13      | 222235 | NM_145032    | 3738 | 0.09  | 0.70  | 0.77  | -0.63 | -0.91 | -0.28 | 0.61  | 1.50  | 1.45 | 1.56  | -1.82 | 3.56 |
| CYP11B1    | 1584   | NM_001026213 | 3739 | -0.26 | 0.49  | 0.29  | -0.66 | -1.00 | -1.10 | 0.06  | 1.95  | 1.54 | 0.52  | -0.75 | 3.56 |
| CI40RF100  | 51528  | NM_001098025 | 3740 | -0.20 | 1.13  | 1.60  | 0.17  | -0.51 | -0.10 | -0.16 | 1.79  | 1.93 | 2.53  | -0.43 | 3.55 |
| CI00RF71   | 118461 | NM_199459    | 3741 | -0.28 | 0.50  | 0.58  | -0.61 | -0.82 | -1.03 | 0.74  | 0.17  | 2.64 | -0.20 | -2.45 | 3.55 |
| ACPS       | 362    | NM_001651    | 3742 | 0.11  | 0.88  | 1.54  | 0.73  | -0.58 | -0.04 | -0.21 | 2.57  | 1.18 | 2.53  | 0.11  | 3.55 |
| STAM2      | 10554  | NM_005843    | 3743 | 2.04  | 1.06  | 1.25  | 1.37  | -0.09 | -0.64 | 1.06  | 1.07  | 1.42 | 4.35  | 0.64  | 3.55 |
| PKGF1      | 84759  | NM_020073    | 3744 | 1.63  | 2.00  | 0.68  | -0.49 | -0.46 | -0.14 | 1.21  | 1.46  | 0.88 | 4.31  | -1.09 | 3.55 |
| NUMU-R1    | 64149  | NM_022344    | 3745 | 0.10  | 0.84  | 0.01  | -0.55 | -0.77 | -0.43 | 1.22  | 1.65  | 0.67 | 0.95  | -1.75 | 3.55 |
| PHC3       | 80012  | NM_024947    | 3746 | 0.25  | -0.47 | 0.52  | -0.89 | -1.18 | -1.45 | 0.18  | -0.03 | 3.40 | 0.30  | -3.52 | 3.55 |
| 711B       | 7314   | NM_018955    | 3747 | 0.98  | 0.20  | 0.20  | 0.98  | 0.20  | -0.77 | 0.62  | 0.27  | 1.02 | 0.81  | 2.82  | 3.54 |
| ANKS1      | 23294  | NM_015245    | 3748 | -0.42 | 0.95  | 0.73  | -1.14 | -0.37 | -1.07 | 0.77  | 1.04  | 1.74 | 1.26  | -2.59 | 3.54 |
| TFRC       | 7037   | NM_003234    | 3749 | 2.13  | 1.07  | 0.63  | -1.02 | -1.55 | -1.40 | 1.28  | 1.09  | 1.17 | 3.83  | -3.97 | 3.54 |
| ADHGA181   | 4339   | NM_006689    | 3750 | 1.06  | 0.69  | 1.00  | -0.12 | 0.30  | -1.43 | 0.12  | 0.82  | 1.00 | 4.76  | 0.59  | 3.54 |
| ACV-3      | 91703  | NM_080658    | 3751 | 0.69  | 0.72  | -0.21 | -0.83 | -0.96 | -0.90 | 0.97  | 1.97  | 0.60 | 1.20  | -2.69 | 3.54 |
| VP59       | 23339  | NM_015289    | 3752 | 0.00  | -0.20 | 0.62  | -0.43 | -0.41 | -0.73 | 0.90  | 0.68  | 1.96 | 0.42  | -1.57 | 3.54 |
| BLM        | 541    | NM_000657    | 3753 | 1.48  | -0.73 | 1.05  | 0.07  | -0.54 | 0.29  | 2.91  | 0.05  | 0.58 | 1.81  | -1.09 | 3.54 |
| MGC33414   | 25710  | NM_175274    | 3754 | 0.09  | 0.36  | 0.35  | -0.22 | -0.58 | -0.12 | 1.65  | 0.07  | 1.18 | 2.01  | -0.41 | 3.54 |
| PPA        | 5478   | NM_021130    | 3755 | 2.81  | 4.62  | 3.53  | 0.66  | 2.88  | 2.90  | 1.76  | 1.12  | 0.66 | 10.96 | 6.45  | 3.54 |
| KRTPA-14   | 85282  | NM_033059    | 3756 | 1.72  | 0.17  | 0.21  | -0.14 | -0.18 | -0.73 | 1.77  | 0.66  | 1.11 | 2.09  | -1.04 | 3.54 |
| 553B       | 553    | NM_010178    | 3757 | 0.41  | 0.32  | 0.32  | 0.83  | 1.63  | 1.25  | 1.65  | 0.75  | 0.83 | 0.39  | -0.25 | 3.53 |
| DKFZ434342 | 84081  | NM_032141    | 3758 | 1.14  | -0.66 | 0.11  | -1.51 | -1.69 | -1.47 | 0.95  | 0.74  | 1.84 | -0.69 | -0.47 | 3.53 |
| REX1       | 57455  | NM_020095    | 3759 | 1.01  | 0.53  | 1.79  | -0.89 | 0.64  | -0.26 | 1.52  | 0.21  | 1.80 | 3.32  | -0.51 | 3.53 |
| 1087G      | 1087   | NM_006622    | 3760 | -0.28 | 1.24  | 0.94  | -0.07 | -0.64 | -0.60 | 1.69  | 0.85  | 1.60 | 4.41  | -0.24 | 3.53 |
| RM4        | 6047   | NM_002938    | 3761 | 8.73  | 5.20  | 3.49  | 0.00  | -1.37 | -0.04 | 2.26  | 1.13  | 0.13 | 17.43 | -1.41 | 3.53 |
| TGF81      | 7040   | NM_000660    | 3762 | 0.36  | 0.65  | 0.83  | 0.06  | 0.62  | -1.10 | 0.17  | 0.65  | 2.71 | 1.84  | -0.42 | 3.53 |
| UHRP1      | 29128  | NM_013282    | 3763 | 11.68 | 35.72 | 11.40 | 5.71  | 3.04  | 1.21  | 1.03  | 0.86  | 1.64 | 38.81 | 9.97  | 3.53 |
| 2282       | 2282   | NM_004023    | 3764 | 2.41  | 1.44  | 1.38  | 1.28  | 0.67  | 1.54  | 1.28  | 0.67  | 1.54 | 6.23  | 0.39  | 3.53 |
| LOC146167  | 146167 | NM_001080442 | 3765 | 2.46  | 2.92  | 0.71  | -0.19 | 0.20  | 0.12  | 2.03  | 0.94  | 0.55 | 6.08  | 0.13  | 3.53 |
| KMA1202    | 57477  | NM_020717    | 3766 | -0.47 | -0.04 | -0.34 | -1.09 | -1.36 | -0.85 | 0.43  | 2.47  | 0.62 | -0.86 | -3.30 | 3.52 |
| DIRL1      | 79129  | NM_042925    | 3767 | 0.11  | 1.70  | 1.46  | -0.20 | -0.20 | -0.20 | 1.01  | 1.01  | 1.01 | 0.21  | 0.11  | 3.52 |
| ALS2       | 57679  | NM_020919    | 3768 | 3.21  | 3.20  | 0.70  | 1.00  | 1.23  | -0.08 | 0.43  | 0.81  | 0.30 | 7.10  | 2.14  | 3.52 |
| AKR1D1     | 6718   | NM_005989    | 3769 | 0.67  | 1.35  | 0.52  | -1.00 | -0.67 | -0.51 | 0.91  | 1.90  | 0.72 | 2.54  | -2.19 | 3.52 |
| 62H45      | 5616   | NM_004495    | 3770 | 0.18  | 0.86  | 0.95  | -0.70 | -0.72 | -0.46 | 0.86  | 0.86  | 2.92 | 5.99  | 1.31  | 3.52 |
| DKFZ762A11 | 160335 | NM_152588    | 3771 | 0.83  | 0.82  | 2.12  | -0.33 | -0.50 | -0.14 | 1.20  | 0.55  | 1.77 | 3.78  | -0.96 | 3.52 |
| KIA0415    | 9907   | NM_014855    | 3772 | 1.06  | 0.56  | 0.56  | 0.16  | -0.27 | -0.05 | 1.49  | 0.99  | 1.04 | 2.18  | -0.76 | 3.52 |
| LOC388659  | 284511 | NM_00102883  | 3773 | 1.83  | 0.86  | 1.30  | -0.32 | -0.40 | -0.94 | 1.44  | 0.86  | 1.21 | 3.99  | -1.06 | 3.51 |
| 19X1       | 579    | NM_001189    | 3774 | 1.40  | 1.44  | 1.44  | 1.42  | 1.42  | 1.42  | 1.42  | 1.42  | 1.42 | 4.26  | 0.58  | 3.51 |
| KIA0056    | 23110  | NM_015261    | 3775 | 1.26  | 1.09  | 2.43  | 0.38  | 0.01  | -0.21 | 0.78  | 1.23  | 1.50 | 4.78  | -0.17 | 3.51 |
| LN9        | 28626  | NM_173083    | 3776 | 1.50  | -0.12 | 0.27  | -0.96 | 0.38  | 0.74  | 2.75  | -0.37 | 1.13 | 1.65  | -1.31 | 3.51 |
| 14HGAP12   | 94134  | NM_013287    | 3777 | 0.57  | 0.39  | 0.21  | -0.27 | -0.19 | -0.20 | 0.12  | 0.16  | 0.20 | 0.12  | 1.71  | 3.51 |
| FLJ2549    | 144577 | NM_152440    | 3778 | 1.92  | 0.78  | 0.94  | -1.78 | -0.07 | -0.28 | 2.20  | 0.52  | 0.78 | 3.64  | -1.14 | 3.51 |
| PPP19B     | 84887  | NM_032995    | 3779 | 3.03  | 1.08  | 1.21  | 1.44  | 1.60  | 2.96  | 2.57  | 0.72  | 0.16 | 5.33  | 6.00  | 3.50 |
| FLJ2342    | 7868   | NM_012421    | 3780 | 0.68  | 0.32  | 0.64  | -0.07 | -0.64 | -0.60 | 1.69  | 0.85  | 0.65 | 1.77  | -3.01 | 3.50 |
| TDE2       | 57515  | NM_020755    | 3781 | 1.42  | 0.18  | 0.58  | -0.61 | -1.35 | -0.29 | 1.01  | 1.50  | 0.99 | 2.18  | -2.35 | 3.50 |
| SUCO3A1    | 28232  | NM_013272    | 3782 | 1.49  | 3.51  | 0.55  | -0.59 | -0.16 | -0.27 | 1.15  | 2.08  | 0.28 | 5.55  | -1.01 | 3.50 |
| COLEC11    | 78989  | NM_040207    | 3783 | 0.90  | 0.61  | 1.19  | 0.71  | 0.57  | 1.63  | 0.75  | 1.11  | 1.64 | 2.70  | 2.90  | 3.50 |
| WDR11      | 11105  | NM_00102886  | 3784 | 1.53  | 1.01  | 1.11  | 0.55  | 0.67  | 0.67  | 1.60  | 0.56  | 0.75 | 4.75  | 0.81  | 3.50 |
| MIA        | 8190   | NM_006533    | 3785 | 1.18  | 1.41  | 1.22  | 1.10  | -0.57 | 0.45  | 1.02  | 1.40  | 1.08 | 3.81  | -0.02 | 3.50 |
| MIG12      | 85826  | NM_021242    | 3786 | 0.63  | 0.64  | 0.44  | -0.53 | -1.21 | -0.75 | 0.48  | 2.12  | 0.89 | 1.71  | -2.49 | 3.50 |
| MEME1      | 8289   | NM_023279    | 3787 | 0.55  | 0.23  | 0.29  | -1.47 | -1.09 | -0.25 | 2.41  | 0.92  | 1.02 | 4.03  | -0.24 | 3.50 |
| GEORF150   | 115004 | NM_138441    | 3788 | -0.68 | -0.21 | -0.05 | -0.89 | -1.41 | -1.48 | 0.28  | 1.12  | 2.10 | -0.95 | -3.78 | 3.50 |
| GEM2       | 64888  | NM_022469    | 3789 | 2.14  | 1.39  | 0.71  | -0.15 | -0.13 | 0.19  | 0.92  | 2.29  | 0.28 | 4.24  | -0.09 | 3.50 |
| 44N14      | 5495   | NM_0010761   | 3790 | -1.27 | 0.56  | 2.30  | -0.42 | -1.10 | -0.56 | 1.60  | 1.60  | 2.67 | 4.67  | -0.84 | 3.50 |
| TAT        | 6898   | NM_000353    | 3791 | -0.27 | -0.03 | 0.12  | -1.12 | -1.59 | -0.95 | 0.58  | 1.82  | 1.09 | -0.17 | -3.77 | 3.49 |
| CD247      | 919    | NM_000734    | 3792 | -0.98 | -1.02 | -0.76 | -1.67 | -1.57 | -1.62 | 0.28  | 0.17  | 3.04 | -2.77 | -4.78 | 3.49 |
| FLJ2548    | 79642  | NM_024990    | 3793 | 0.44  | 1.05  | 0.71  | -0.37 | -0.80 | -0.30 | 0.70  | 1.86  | 0.91 | 2.20  | -1.56 | 3.49 |
| LRP12      | 2996   | NM_014837    | 3794 | 1.88  | 1.72  | 1.38  | 1.83  | 1.67  | 1.93  | 2.50  | 1.67  | 1.88 | 5.79  | 1.81  | 3.49 |
| TRA2A      | 29896  | NM_013293    | 3795 | 2.07  | 0.86  | 1.18  | -0.56 | 0.03  | 0.14  | 1.87  | 1.19  | 0.43 | 4.10  | -0.38 | 3.49 |
| SUC2A4     | 12394  | NM_153429    | 3796 | 0.78  | -0.34 | 0.10  | -1.58 | 0.74  | -0.94 | -0.27 | -0.66 | 4.42 | 0.54  | -1.38 | 3.49 |
| CARR       | 112    | NM_000715    | 3797 | 1.44  | 1.78  | 2.66  | -0.45 | -0.78 | -0.45 | 1.44  | 1.78  | 2.66 | -0.45 | -0.78 | 3.49 |
| LTBR       | 4055   | NM_002342    | 3798 | -0.68 | -0.91 | -1.18 | -1.97 | -1.96 | -1.79 | 1.44  | 1.09  | 0.95 | -2.78 | -5.72 | 3.49 |
| RA827A     |        |              |      |       |       |       |       |       |       |       |       |      |       |       |      |



|             |        |              |      |       |       |       |       |       |       |       |       |       |       |       |      |
|-------------|--------|--------------|------|-------|-------|-------|-------|-------|-------|-------|-------|-------|-------|-------|------|
| VGLA        | 9686   | NM_001128220 | 3881 | -0.11 | 0.72  | -0.48 | -0.69 | -0.51 | -0.66 | 1.08  | 2.26  | 0.07  | 0.13  | -1.87 | 3.40 |
| MST01       | 5570   | NM_0004490   | 3882 | -0.63 | 1.24  | 0.00  | -0.88 | -0.94 | -0.98 | 0.61  | 3.89  | 0.89  | 0.63  | -1.24 | 3.40 |
| H8B         | 3267   | NM_0004504   | 3883 | 2.37  | 1.72  | 1.53  | 0.84  | -0.29 | 0.53  | 0.59  | 2.57  | 0.24  | 6.63  | 1.07  | 3.40 |
| MORF4L1     | 10933  | NM_006791    | 3884 | -0.15 | 1.21  | 1.77  | 0.26  | 0.13  | -0.01 | -0.40 | 2.15  | 1.65  | 2.84  | 0.38  | 3.40 |
| S072        | 51992  | NM_001004055 | 3885 | -0.13 | -0.66 | 0.68  | -1.35 | -1.39 | -1.26 | 1.24  | -0.13 | 2.30  | -0.11 | -0.99 | 3.40 |
| R0R         | 26074  | NM_135015    | 3886 | 0.00  | 0.46  | 1.18  | 0.00  | 0.00  | 0.00  | 0.52  | 1.50  | 0.61  | 1.79  | 0.81  | 3.40 |
| AP0A1       | 335    | NM_0002039   | 3887 | 0.03  | -0.48 | 0.15  | -1.39 | -1.26 | -0.92 | 1.44  | 1.04  | 0.92  | -0.30 | -1.57 | 3.40 |
| SC3A5       | 6553   | NM_0004794   | 3888 | -0.46 | 0.07  | -0.40 | -0.98 | -1.21 | -1.09 | 0.45  | 2.46  | 0.49  | -0.83 | -0.28 | 3.40 |
| K8RE12      | 8465   | NM_0001779   | 3889 | 1.24  | 2.80  | 1.80  | 0.94  | 1.02  | 1.30  | 1.02  | 1.80  | 1.02  | 7.44  | 0.57  | 3.40 |
| GP1008      | 8843   | NM_0006018   | 3890 | -0.02 | 0.30  | 0.19  | -1.22 | -1.52 | -1.14 | 1.03  | 1.61  | 0.76  | 0.47  | -1.88 | 3.40 |
| MAPN2       | 60484  | NM_021817    | 3891 | -0.36 | -0.88 | 0.71  | -1.94 | -2.04 | -1.51 | 1.54  | 0.45  | 1.41  | -1.95 | -0.49 | 3.40 |
| T2FR        | 2274   | NM_0003863   | 3892 | -0.58 | 0.39  | 0.67  | -0.89 | -0.86 | -0.86 | 0.66  | 2.77  | 0.96  | -0.11 | -1.16 | 3.40 |
| KMA1117     | 23033  | NM_015018    | 3893 | 2.56  | 0.91  | 1.43  | 1.14  | 0.99  | 0.44  | 1.16  | 0.27  | 1.95  | 4.91  | 1.69  | 3.39 |
| GAL3T4      | 79690  | NM_024637    | 3894 | -0.53 | 0.52  | -0.77 | -1.00 | -0.40 | -1.00 | 1.40  | 0.82  | 1.17  | -0.78 | -2.40 | 3.39 |
| LOC35565    | 55565  | NM_017530    | 3895 | 1.82  | 0.70  | 0.07  | -0.88 | -0.27 | -0.32 | 1.73  | 1.21  | 0.44  | 2.18  | -1.47 | 3.39 |
| DOX43       | 55510  | NM_018665    | 3896 | -0.30 | 0.73  | -0.61 | -1.33 | -1.74 | -1.62 | 1.25  | 1.08  | 1.06  | 1.63  | -0.68 | 3.39 |
| CDKN2D      | 1032   | NM_079421    | 3897 | 0.72  | 1.92  | 2.48  | 0.34  | 1.40  | 1.23  | 0.68  | 0.44  | 2.27  | 5.12  | 2.96  | 3.39 |
| AK2         | 204    | NM_001625    | 3898 | 2.39  | 2.30  | 1.82  | 0.96  | 0.55  | 0.71  | 1.12  | 0.91  | 1.36  | 6.51  | 2.23  | 3.39 |
| PHX2        | 2852   | NM_0010797   | 3899 | 2.20  | 1.68  | 2.81  | 0.30  | 0.65  | 0.09  | 0.76  | 1.14  | 1.49  | 6.79  | 1.04  | 3.39 |
| FLJ3670     | 284558 | NM_001130915 | 3900 | 0.27  | 0.80  | 1.91  | -0.64 | -0.61 | -1.02 | 0.47  | 0.87  | 2.05  | 2.97  | -2.27 | 3.39 |
| DOX5        | 55816  | NM_177959    | 3901 | 2.74  | 2.29  | 1.27  | 0.21  | 0.49  | 0.77  | 2.03  | 0.78  | 0.58  | 6.30  | 1.47  | 3.39 |
| NBE1A       | 26960  | NM_0150778   | 3902 | 1.41  | 1.65  | 0.13  | -0.33 | -0.80 | -0.18 | 1.28  | 2.06  | 0.05  | 3.19  | -1.31 | 3.39 |
| RFS6A3      | 6197   | NM_004586    | 3903 | 0.71  | 0.44  | -0.33 | -0.84 | -0.96 | -0.93 | 1.18  | 1.20  | 1.01  | 0.82  | -0.73 | 3.39 |
| CCNB1       | 891    | NM_031966    | 3904 | -0.78 | -0.95 | 0.36  | -2.89 | -2.28 | -0.06 | 2.27  | 0.64  | 0.47  | -1.37 | -5.22 | 3.38 |
| FLJ12476    | 64799  | NM_001017215 | 3905 | 5.09  | 4.39  | 3.69  | 0.52  | 0.69  | 1.51  | 1.74  | 1.67  | -0.03 | 11.37 | 2.71  | 3.38 |
| PTPRN18     | 26460  | NM_014869    | 3906 | -0.35 | -0.07 | -0.03 | -0.94 | -1.21 | -1.10 | 0.44  | 1.30  | 1.64  | 0.45  | -1.33 | 3.38 |
| FLJ4635     | 392400 | NM_207422    | 3907 | 1.45  | 0.98  | 1.43  | 0.13  | 0.17  | 0.45  | 0.68  | 2.12  | 0.58  | 3.86  | 0.76  | 3.38 |
| CO-41       | 51093  | NM_015997    | 3908 | 1.21  | 3.18  | 1.26  | 1.35  | 0.10  | -0.00 | 1.19  | 1.35  | 0.84  | 10.66 | 1.39  | 3.38 |
| STC1        | 678    | NM_001155    | 3909 | 1.45  | 0.68  | 0.68  | 0.17  | 0.17  | 0.17  | 2.21  | 0.47  | 0.17  | 4.03  | 1.01  | 3.38 |
| DFZP434212  | 26130  | NM_015635    | 3910 | 1.40  | 0.99  | 0.78  | 0.06  | 0.05  | -0.62 | 1.48  | 0.78  | 1.12  | 3.17  | -0.63 | 3.38 |
| ZNF429      | 353088 | NM_001014515 | 3911 | 4.80  | 2.26  | 3.89  | 2.72  | 0.50  | 1.80  | 0.68  | 1.47  | 1.22  | 11.05 | 5.02  | 3.38 |
| APC1        | 441    | NM_000645    | 3912 | 1.82  | -0.23 | 0.73  | -0.44 | -0.15 | -0.34 | 2.54  | 0.27  | 0.81  | 0.87  | -0.29 | 3.38 |
| LDN10       | 9071   | NM_006984    | 3913 | 2.40  | 1.51  | 0.77  | 1.10  | 0.80  | 2.52  | 1.66  | 2.35  | 0.64  | 5.68  | 4.42  | 3.38 |
| ZNF211      | 118472 | NM_145806    | 3914 | 0.71  | 1.36  | 0.44  | -0.26 | -0.68 | -0.65 | 1.01  | 1.45  | 0.92  | 2.51  | -1.59 | 3.38 |
| MT02        | 57415  | NM_020885    | 3915 | 0.97  | 1.32  | 1.10  | -0.52 | -0.88 | -0.52 | 0.80  | 1.33  | 1.25  | 3.38  | -1.93 | 3.38 |
| ZNF24       | 7078   | NM_029411    | 3916 | 1.74  | 1.18  | 1.55  | 0.42  | 0.18  | 0.02  | 2.15  | 0.42  | 1.11  | 4.44  | 0.14  | 3.38 |
| USP42       | 84132  | NM_032172    | 3917 | 1.87  | 2.96  | 2.81  | 0.49  | 0.84  | 0.18  | 0.64  | 1.18  | 1.56  | 7.63  | 1.51  | 3.37 |
| UROD        | 7389   | NM_000074    | 3918 | 2.44  | 1.74  | 1.16  | -0.27 | -0.28 | 0.13  | 1.12  | 1.53  | 0.72  | 5.34  | -0.41 | 3.37 |
| USP1        | 5140   | NM_015153    | 3919 | 0.79  | 1.08  | 0.80  | -0.97 | -0.05 | 2.80  | 0.97  | 1.79  | 0.90  | 0.79  | -0.79 | 3.37 |
| SEPT1       | 1751   | NM_052838    | 3920 | -0.13 | -0.24 | 0.89  | -1.10 | -1.11 | -1.43 | 0.34  | 0.90  | 2.12  | 0.51  | -1.64 | 3.37 |
| MGC10871    | 83759  | NM_031492    | 3921 | 3.06  | 2.73  | 2.09  | 0.45  | 0.88  | -0.28 | 1.07  | 0.76  | 1.54  | 7.89  | 1.05  | 3.37 |
| DCOY136     | 22145  | NM_001010908 | 3922 | 0.70  | 0.31  | 1.24  | 0.22  | 0.20  | 0.82  | 1.72  | 0.22  | 1.77  | 2.33  | -0.20 | 3.37 |
| DGKK        | 139189 | NM_001013742 | 3923 | 0.28  | 0.16  | 0.67  | -0.24 | 0.21  | -0.20 | 1.09  | 0.28  | 1.99  | 0.79  | -0.23 | 3.37 |
| HADHA       | 3030   | NM_000182    | 3924 | 0.31  | 0.63  | 1.54  | -0.51 | -0.34 | -0.53 | 0.84  | 0.42  | 2.10  | 2.47  | -1.38 | 3.37 |
| CDKB3       | 1329   | NM_001062    | 3925 | -0.08 | 0.82  | 0.39  | -0.93 | 0.16  | -0.38 | 1.20  | 1.09  | 1.07  | 1.13  | -1.15 | 3.36 |
| ZNF202      | 150    | NM_001312    | 3926 | 0.21  | 0.43  | 0.98  | 0.21  | 1.49  | 0.43  | 0.21  | 1.49  | 0.31  | 1.21  | 1.29  | 3.36 |
| HSPC129     | 51496  | NM_016396    | 3927 | 2.16  | 1.28  | 0.24  | -0.38 | -0.79 | -0.21 | 1.70  | 1.28  | 0.38  | 3.67  | -1.37 | 3.36 |
| LYVE        | 4061   | NM_002246    | 3928 | -0.16 | -0.04 | 2.39  | -0.38 | -1.07 | -0.54 | 0.55  | 0.34  | 2.47  | 2.51  | -1.99 | 3.36 |
| SL11004     | 5532   | NM_018296    | 3929 | 1.09  | 0.04  | 0.45  | -0.10 | -0.04 | 0.24  | 0.62  | 1.61  | 1.11  | 0.69  | -0.69 | 3.36 |
| B3GAL14     | 8705   | NM_003782    | 3930 | -0.58 | -0.48 | 1.04  | -0.90 | -1.05 | -1.39 | 0.03  | 0.45  | 2.88  | -0.02 | -1.14 | 3.36 |
| R659        | 8787   | NM_003835    | 3931 | 0.75  | 0.17  | 0.28  | -0.47 | 0.12  | -1.03 | 1.45  | 0.38  | 1.53  | 1.20  | -1.38 | 3.36 |
| ENH3        | 23465  | NM_041123    | 3932 | -0.33 | 0.72  | -0.09 | -0.81 | -0.33 | 2.52  | 0.72  | 0.81  | 0.81  | 0.30  | -0.90 | 3.36 |
| LOC49380    | 49380  | NM_001008391 | 3933 | 1.96  | 1.05  | 1.11  | -0.22 | -0.30 | 0.15  | 1.87  | 1.07  | 0.41  | 4.12  | -0.37 | 3.35 |
| ZNF497      | 162968 | NM_198458    | 3934 | 0.11  | 1.11  | 0.48  | -0.01 | -0.15 | -0.96 | 0.59  | 1.01  | 1.75  | 1.70  | -1.12 | 3.35 |
| WDFY1       | 57590  | NM_020830    | 3935 | 0.17  | 1.13  | 1.60  | -0.21 | -0.34 | -0.67 | -0.04 | 1.15  | 2.24  | 2.88  | -1.22 | 3.35 |
| HCH3        | 2627   | NM_139047    | 3936 | 0.09  | 0.45  | 0.14  | 0.36  | 0.46  | 0.85  | 0.79  | 1.10  | 0.69  | 0.99  | 1.95  | 3.35 |
| ZNF182      | 83992  | NM_034297    | 3937 | 1.70  | 2.84  | 1.00  | 0.20  | 0.95  | -0.21 | 1.13  | 1.31  | 0.91  | 6.44  | 0.94  | 3.35 |
| SELB        | 63079  | NM_021937    | 3938 | 0.39  | 0.22  | -0.14 | -1.89 | -1.09 | -1.03 | 1.20  | 2.11  | 0.04  | 0.47  | -4.51 | 3.35 |
| CCND3       | 8367   | NM_001467    | 3939 | 1.16  | 1.12  | 2.78  | 1.45  | 1.11  | 0.29  | 1.16  | 1.12  | 0.91  | 6.68  | 2.94  | 3.35 |
| RBM28       | 50484  | NM_015173    | 3940 | -0.38 | 0.66  | 2.18  | -0.23 | 0.39  | 0.60  | 1.35  | 0.00  | 2.00  | 5.92  | 0.77  | 3.35 |
| CPA5        | 93979  | NM_080385    | 3941 | 3.14  | 0.19  | 1.04  | -0.08 | -0.23 | -0.17 | 1.84  | 0.30  | 1.20  | 4.37  | -0.32 | 3.34 |
| SCAND1      | 51392  | NM_000360    | 3942 | 1.41  | -0.55 | 1.01  | -0.71 | -0.88 | -0.69 | 2.31  | 1.47  | 0.81  | 0.71  | -0.29 | 3.34 |
| MGC2885     | 26710  | NM_152779    | 3943 | -0.51 | 0.60  | -0.08 | -1.49 | -0.58 | -1.34 | 1.04  | 0.04  | 2.26  | -1.19 | -3.42 | 3.34 |
| AGMAT       | 79814  | NM_024758    | 3944 | 0.22  | 0.81  | 0.14  | -0.82 | -0.77 | -1.22 | 0.79  | 0.96  | 1.59  | 1.17  | -2.80 | 3.34 |
| EVER2       | 14738  | NM_152488    | 3945 | -0.04 | -0.28 | -0.48 | -0.56 | -1.27 | -1.22 | 1.22  | 1.39  | 0.73  | -0.80 | -0.56 | 3.34 |
| S074        | 2402   | NM_0012040   | 3946 | 2.83  | 1.49  | 2.10  | 0.47  | 0.50  | 0.90  | 1.47  | 1.49  | 0.90  | 5.23  | 1.85  | 3.34 |
| DCR4        | 10281  | NM_005867    | 3947 | 0.17  | 1.97  | 3.67  | 0.45  | 0.26  | -0.15 | -0.09 | 1.11  | 2.33  | 5.80  | 0.56  | 3.34 |
| OR16        | 92390  | NM_001004053 | 3948 | 1.48  | 1.98  | 2.84  | 0.08  | 0.64  | -0.52 | 1.36  | 0.89  | 1.09  | 6.30  | 1.25  | 3.34 |
| DFZP5660134 | 8157   | NM_000816    | 3949 | 0.03  | 0.14  | 0.14  | -0.17 | -0.85 | -0.89 | 1.69  | 1.07  | 1.17  | 0.10  | -0.11 | 3.34 |
| PDXK        | 8566   | NM_003681    | 3950 | 0.97  | 1.68  | 1.87  | 0.06  | -0.42 | 0.18  | 0.17  | 1.54  | 1.62  | 4.53  | 0.33  | 3.33 |
| PSKH2       | 85481  | NM_033126    | 3951 | 2.59  | 3.17  | 3.18  | 0.44  | 0.32  | 1.07  | 0.94  | 1.37  | 1.02  | 8.95  | 1.83  | 3.33 |
| ZNF628      | 5790   | NM_000747    | 3952 | 1.59  | 1.35  | 0.90  | -0.24 | -0.10 | 0.62  | 1.59  | 1.35  | 0.24  | 3.85  | -0.38 | 3.33 |
| M0GAL1      | 26672  | NM_153487    | 3953 | 0.31  | 1.00  | 1.24  | -0.14 | 0.23  | -0.28 | 0.57  | 0.97  | 1.80  | 2.66  | 1.19  | 3.33 |
| GAL5        | 2582   | NM_001008216 | 3954 | -0.26 | -0.52 | 2.03  | -1.22 | -1.29 | 1.56  | 1.48  | 0.98  | 0.87  | 1.25  | -0.95 | 3.33 |
| FLJ20557    | 55659  | NM_017979    | 3955 | 1.44  | 0.65  | 0.91  | -0.54 | -0.12 | 0.00  | 1.78  | 0.46  | 1.09  | 1.00  | -0.66 | 3.33 |
| LOC35003    | 34046  | NM_0000893   | 3956 | 0.96  | 1.28  | 1.50  | 0.62  | 1.06  | 1.41  | 1.66  | 0.68  | 2.75  | 2.15  | 1.33  | 3.33 |
| TTL3        | 26140  | NM_001025930 | 3957 | 1.78  | 2.15  | 1.24  | 0.33  | 0.36  | 0.07  | 1.60  | 0.97  | 0.76  | 5.17  | 0.77  | 3.33 |
| LOC338949   | 338949 | NM_001080462 | 3958 | 0.91  | 0.66  | 0.80  | 0.86  | 0.26  | 0.45  | 0.46  | 2.54  | 0.33  | 2.38  | 1.57  | 3.33 |
| ZNF45       | 23668  | NM_00103222  | 3959 | 0.43  | 0.73  | 1.09  | 0.63  | 0.62  | 1.50  | 0.73  | 1.09  | 0.63  | 0.39  | -0.26 | 3.33 |
| GJC2C       | 2984   | NM_004963    | 3960 | 1.95  | 1.60  | 0.98  | 0.51  | 0.25  | 0.40  | 1.54  | 0.97  | 0.82  | 4.53  | 1.16  | 3.33 |
| RGS11       | 8786   | NM_          |      |       |       |       |       |       |       |       |       |       |       |       |      |

|           |        |              |      |       |       |       |       |       |       |       |       |       |       |       |      |      |
|-----------|--------|--------------|------|-------|-------|-------|-------|-------|-------|-------|-------|-------|-------|-------|------|------|
| BLUN004   | 56853  | NM_001025089 | 4043 | 0.00  | 0.83  | 0.74  | -0.50 | -0.60 | -0.91 | 0.66  | 1.94  | 1.34  | 1.58  | -2.01 | 3.24 |      |
| BLA1400   | 57170  | NM_001023051 | 4044 | 0.22  | 2.32  | 0.69  | -0.40 | 0.88  | 0.21  | 0.56  | 2.31  | 0.41  | 0.37  | 3.47  | 0.21 | 3.24 |
| FLU1126   | 55308  | NM_018332    | 4045 | 1.22  | 1.15  | 1.01  | -0.80 | -0.63 | 0.22  | 1.94  | 1.11  | 0.20  | 3.88  | -1.20 | 3.24 |      |
| GRM7      | 2917   | NM_181875    | 4046 | 0.60  | 0.91  | 0.88  | -0.92 | -1.01 | -0.80 | 0.57  | 1.64  | 1.03  | 2.40  | -2.74 | 3.24 |      |
| PKR       | 10026  | NM_005482    | 4047 | 1.04  | 0.88  | 1.29  | 0.08  | 0.14  | -0.23 | 1.14  | 0.20  | 1.90  | 3.01  | -0.01 | 3.24 |      |
| ROM12     | 34522  | NM_023443    | 4048 | 2.97  | 1.39  | 1.60  | -0.19 | 0.09  | 0.17  | 1.85  | 0.39  | 0.41  | 3.75  | 0.41  | 3.24 |      |
| LOC123688 | 123688 | NM_00108381  | 4049 | 4.59  | 0.22  | 0.98  | 0.56  | 0.07  | 1.87  | 2.81  | 0.44  | -0.02 | 5.79  | 2.50  | 3.24 |      |
| SCR10     | 374875 | NM_198704    | 4050 | -0.73 | 0.58  | 1.42  | -0.98 | -0.63 | -0.18 | 0.08  | 0.78  | 2.38  | 1.27  | -1.79 | 3.24 |      |
| TBN       | 129645 | NM_0010123   | 4051 | 0.40  | 0.13  | 1.40  | -0.17 | 0.53  | 0.87  | 1.67  | 0.52  | 1.32  | 1.03  | 1.16  | 3.24 |      |
| C1R       | 715    | NM_001733    | 4052 | 0.30  | -0.13 | 1.19  | -0.90 | -0.12 | -0.79 | 0.70  | 0.92  | 1.61  | 1.36  | -1.80 | 3.23 |      |
| RHC       | 51458  | NM_016231    | 4053 | 3.95  | 1.75  | 1.19  | 0.39  | -0.04 | 1.20  | 2.24  | 0.92  | 0.08  | 6.88  | 1.55  | 3.23 |      |
| PHG4      | 79634  | NM_0010381   | 4054 | 6.02  | 0.65  | 0.89  | -0.99 | -0.78 | -0.85 | 0.15  | 0.22  | 2.12  | 1.55  | -2.08 | 3.23 |      |
| GTZF1     | 2962   | NM_002096    | 4055 | 1.00  | 0.66  | 0.80  | -0.30 | -0.53 | -0.90 | 1.07  | 2.12  | 0.05  | 1.67  | -1.73 | 3.23 |      |
| DRCTNNB1A | 84668  | NM_032581    | 4056 | 1.32  | 0.69  | 0.05  | -0.56 | -1.13 | -0.46 | 1.05  | 1.39  | 0.80  | 2.06  | -2.15 | 3.23 |      |
| RCMB      | 285704 | NM_173670    | 4057 | 4.85  | 3.23  | 4.20  | 0.65  | 1.35  | 1.15  | 0.99  | 0.96  | 1.28  | 11.79 | 3.15  | 3.23 |      |
| NO3C2     | 4718   | NM_000499    | 4058 | 0.69  | 0.18  | 1.24  | -0.11 | 0.00  | 0.38  | 0.88  | 1.50  | 0.84  | 3.21  | 0.27  | 3.23 |      |
| FLU3776   | 649446 | NM_001039796 | 4059 | 1.03  | 0.40  | 0.81  | 0.62  | -0.32 | 0.41  | 2.57  | 0.57  | 0.09  | 2.24  | 0.71  | 3.23 |      |
| DEDD      | 9191   | NM_004216    | 4060 | 1.57  | 1.22  | -0.01 | -0.49 | -0.50 | -0.54 | 1.96  | 1.14  | 0.12  | 2.79  | -1.53 | 3.23 |      |
| NH52      | 7827   | NM_010425    | 4061 | 1.93  | 0.70  | 2.13  | 0.38  | 0.04  | 0.35  | 1.31  | 0.42  | 1.50  | 4.76  | 0.77  | 3.23 |      |
| MGC38633  | 153733 | NM_001040440 | 4062 | 0.45  | 0.98  | 0.83  | -0.43 | -0.82 | -0.60 | 0.77  | 0.75  | 1.71  | 2.26  | -1.85 | 3.22 |      |
| FLU3941   | 144108 | NM_194285    | 4063 | 0.13  | 0.91  | -0.31 | -0.36 | -0.91 | -0.94 | 0.34  | 2.16  | 0.73  | 0.72  | -2.21 | 3.22 |      |
| ESRA      | 3358   | NM_175728    | 4064 | 1.71  | 1.00  | 0.52  | 0.94  | -0.55 | 0.11  | 0.54  | 1.29  | 1.38  | 3.22  | 0.50  | 3.22 |      |
| XAR2      | 56949  | NM_000196    | 4065 | -0.95 | -1.20 | -0.72 | 1.04  | -2.27 | -2.53 | 0.70  | 0.08  | 2.45  | -0.88 | -3.76 | 3.22 |      |
| NUF37     | 79023  | NM_024057    | 4066 | 0.54  | -0.52 | -0.70 | -1.42 | -1.52 | -1.82 | 0.87  | 1.25  | 1.10  | -0.68 | -4.76 | 3.22 |      |
| AMID18    | 10765  | NM_006618    | 4067 | 2.26  | 1.81  | 1.69  | 1.60  | 0.43  | 0.09  | 0.76  | 0.88  | 1.50  | 5.56  | 2.09  | 3.22 |      |
| MP91      | 4156   | NM_001032    | 4068 | 1.23  | 1.37  | 1.44  | 0.19  | -0.05 | 0.14  | 0.76  | 1.42  | 1.04  | 4.04  | 0.28  | 3.22 |      |
| DZ548     | 7837   | NM_056455    | 4069 | 0.27  | 1.03  | 0.44  | -0.53 | 0.14  | -0.48 | 1.12  | 0.77  | 1.33  | 1.75  | -0.87 | 3.22 |      |
| SEC213    | 9117   | NM_032970    | 4070 | -0.82 | 0.33  | 0.24  | -0.63 | 0.04  | 0.35  | 1.91  | 0.94  | 0.37  | 1.40  | -0.24 | 3.22 |      |
| FN45      | 1594   | NM_019662    | 4071 | 1.42  | 0.71  | 1.23  | 0.61  | 0.49  | 0.62  | 2.04  | 0.69  | 0.82  | 2.35  | 2.25  | 3.22 |      |
| SF384     | 10362  | NM_005850    | 4072 | 0.87  | -1.06 | -0.23 | -1.76 | -2.02 | -2.10 | 0.88  | 1.09  | 1.24  | -2.56 | -5.88 | 3.22 |      |
| CHT4      | 10164  | NM_005769    | 4073 | -0.57 | -0.86 | 2.91  | 0.85  | 0.71  | -1.62 | -0.32 | -1.01 | 4.55  | 1.47  | -0.06 | 3.22 |      |
| FM357A    | 78859  | NM_0010792   | 4074 | 1.20  | 1.84  | 1.19  | 0.20  | 0.68  | 0.67  | 1.86  | 1.67  | 0.60  | 5.82  | 1.25  | 3.22 |      |
| SFAN1     | 94081  | NM_022754    | 4075 | 0.62  | 2.65  | 0.53  | -1.03 | -0.57 | -0.51 | 1.98  | 0.72  | 0.51  | 4.01  | -1.12 | 3.22 |      |
| RBP7      | 116362 | NM_052960    | 4076 | 1.09  | 0.62  | 1.13  | -0.26 | -0.38 | 0.52  | 1.06  | 0.94  | 1.22  | 2.84  | -0.11 | 3.22 |      |
| CSRP2     | 1486   | NM_001321    | 4077 | 1.86  | 1.11  | 1.72  | -0.36 | -1.16 | 0.10  | 0.39  | 2.04  | 0.79  | 4.70  | -1.42 | 3.22 |      |
| FLU4042   | 400073 | NM_207435    | 4078 | 0.13  | -0.66 | 0.99  | -0.62 | 0.66  | 0.79  | 0.65  | 0.86  | 0.92  | 1.78  | 2.78  | 3.22 |      |
| SUC3A11   | 201266 | NM_139177    | 4079 | 2.00  | 0.56  | 3.62  | 0.40  | -0.67 | 0.86  | 0.56  | 1.26  | 1.38  | 6.17  | 0.59  | 3.21 |      |
| LOC44953  | 440503 | NM_001013706 | 4080 | 0.44  | 0.72  | 0.94  | -0.13 | -1.05 | -0.38 | 0.28  | 2.11  | 0.82  | 2.10  | -1.55 | 3.21 |      |
| MGEF2     | 1059   | NM_006420    | 4081 | 0.47  | 0.45  | 1.05  | -0.40 | -0.88 | -0.79 | 1.19  | 0.80  | 0.88  | 1.58  | 2.56  | 3.21 |      |
| FAH       | 2166   | NM_001441    | 4082 | -0.35 | -0.36 | 1.25  | 3.50  | 5.08  | -0.96 | -1.28 | 5.46  | 0.54  | 6.01  | 6.01  | 3.21 |      |
| C20ORF128 | 128876 | NM_178468    | 4083 | 4.16  | 3.40  | 3.91  | 2.10  | 2.83  | 1.93  | 0.93  | 0.88  | 1.40  | 11.47 | 6.85  | 3.21 |      |
| NH70A     | 7483   | NM_0010395   | 4084 | -0.52 | -0.49 | 0.20  | -0.40 | -1.37 | 0.20  | -0.49 | -0.25 | 1.64  | -1.30 | -4.13 | 3.21 |      |
| NANS      | 54187  | NM_018946    | 4085 | 0.48  | 0.15  | -0.82 | -1.49 | -1.56 | -1.41 | 0.50  | 1.84  | 0.86  | 4.54  | 4.46  | 3.21 |      |
| FLU3179   | 257068 | NM_153268    | 4086 | 3.16  | 1.53  | 2.54  | 1.08  | 1.11  | 0.35  | 1.86  | 0.27  | 1.08  | 7.23  | 2.54  | 3.21 |      |
| RPS27A    | 6233   | NM_002954    | 4087 | -0.58 | -1.50 | -1.63 | -1.52 | -2.59 | -2.29 | 0.56  | 1.28  | 1.36  | -3.70 | -6.40 | 3.20 |      |
| SRX29     | 397259 | NM_150449    | 4088 | 1.50  | 0.32  | 3.30  | 0.32  | 1.27  | 0.38  | 1.27  | 0.62  | 3.11  | 3.11  | 0.79  | 3.20 |      |
| ITTC10    | 8100   | NM_006531    | 4089 | 1.33  | 0.13  | 0.40  | -0.82 | -0.23 | -0.41 | 1.95  | 2.00  | 1.06  | 1.87  | -1.46 | 3.20 |      |
| GRP77     | 27202  | NM_018485    | 4090 | 2.22  | 1.36  | 1.21  | 0.61  | 1.32  | 0.49  | 1.66  | 0.56  | 0.98  | 4.78  | 2.42  | 3.20 |      |
| CC2       | 5326   | NM_020561    | 4091 | 0.21  | 0.42  | 0.62  | -0.89 | -0.82 | -0.82 | 0.89  | 1.02  | 0.82  | 1.23  | 0.66  | 3.20 |      |
| RTN48     | 650798 | NM_023004    | 4092 | 0.41  | 0.58  | 0.53  | 0.10  | -0.63 | -0.51 | 0.22  | 1.36  | 1.62  | 1.52  | -1.04 | 3.20 |      |
| RM186     | 54546  | NM_019062    | 4093 | 20.33 | 24.09 | 23.27 | 8.25  | 7.06  | 11.18 | 1.34  | 0.94  | 0.91  | 67.69 | 26.49 | 3.20 |      |
| LOC38715  | 14481  | NM_038110    | 4094 | 0.67  | 0.75  | 0.59  | -0.83 | -0.65 | -0.83 | 0.67  | 1.25  | 1.64  | 2.61  | -1.75 | 3.20 |      |
| FLU10761  | 53224  | NM_018208    | 4095 | 1.16  | 0.03  | 1.28  | -0.49 | -0.21 | -0.88 | 1.33  | 0.11  | 1.74  | 2.47  | -1.58 | 3.20 |      |
| SVA       | 10572  | NM_021709    | 4096 | 2.83  | 4.28  | 2.33  | 1.04  | 0.44  | 0.54  | 1.58  | 0.88  | 1.89  | 4.43  | 9.45  | 3.06 | 3.19 |
| LOH       | 138407 | NM_178469    | 4097 | 0.10  | 0.15  | -0.39 | -1.09 | -0.59 | -1.34 | 0.96  | 1.54  | 0.70  | -0.14 | -3.02 | 3.19 |      |
| NZD0      | 7968   | NM_021443    | 4098 | 1.97  | 0.79  | 0.82  | -1.59 | -0.69 | -0.85 | 1.59  | 0.66  | 0.34  | 4.57  | 0.94  | 3.19 |      |
| DXR11     | 165140 | NM_148962    | 4099 | 0.58  | 1.25  | 1.03  | 0.79  | 0.10  | 0.07  | 0.47  | 1.69  | 1.03  | 2.86  | 0.95  | 3.19 |      |
| PSM84     | 5692   | NM_002796    | 4100 | -1.10 | -1.33 | -1.30 | -2.73 | -3.18 | -2.22 | 2.98  | 0.36  | -0.15 | -3.73 | -8.13 | 3.19 |      |
| FLU11457  | 79839  | NM_002793    | 4101 | 0.42  | 0.59  | 0.62  | -0.42 | -0.59 | -0.46 | 1.19  | 0.62  | 0.57  | 0.50  | 1.86  | 3.19 |      |
| BC17A     | 605    | NM_001024088 | 4102 | 0.52  | 0.33  | 0.43  | -1.11 | -0.15 | -0.81 | 1.00  | 0.85  | 1.34  | 1.27  | -2.08 | 3.18 |      |
| HLA-D8B1  | 3123   | NM_001214    | 4103 | 0.27  | 2.84  | 1.28  | -0.29 | -0.20 | 0.29  | 0.38  | 1.68  | 1.12  | 4.84  | -0.20 | 3.18 |      |
| LOC104203 | 55798  | NM_010398    | 4104 | -0.14 | 0.31  | 0.34  | -1.11 | -0.77 | -1.21 | 0.87  | 0.60  | 0.47  | -0.17 | -0.16 | 3.18 |      |
| CCSL      | 983    | NM_001253    | 4105 | 0.75  | -0.98 | -0.43 | -2.63 | -1.66 | -1.98 | 1.88  | 0.09  | 1.21  | 2.16  | -2.27 | 3.18 |      |
| WRD11     | 55717  | NM_018117    | 4106 | 1.99  | 1.97  | 2.29  | 1.83  | 2.06  | 0.85  | 0.90  | 0.54  | 1.74  | 6.25  | 4.74  | 3.18 |      |
| FLU2170   | 80189  | NM_025099    | 4107 | -0.27 | -1.01 | 0.64  | -1.26 | -1.77 | -0.99 | 0.65  | -0.12 | 2.65  | -0.65 | -4.02 | 3.18 |      |
| FLU8190   | 32382  | NM_001031    | 4108 | 0.67  | 0.31  | 1.36  | -0.10 | -0.28 | 0.21  | 1.10  | 2.68  | 0.22  | 2.68  | 5.34  | 3.18 |      |
| MAN2A2    | 4122   | NM_006122    | 4109 | 0.02  | -0.11 | -0.06 | -0.38 | -1.13 | -1.10 | 1.21  | 1.27  | 0.70  | -0.14 | -1.61 | 3.18 |      |
| PRP51     | 5631   | NM_002764    | 4110 | 0.69  | 0.63  | -0.22 | -0.38 | -0.34 | -0.82 | 1.16  | 1.04  | 0.98  | 1.10  | -1.54 | 3.18 |      |
| FLU3752   | 13963  | NM_004411    | 4111 | 1.21  | 0.79  | 2.34  | -0.15 | -0.29 | -0.45 | 0.44  | 0.78  | 0.45  | 3.34  | 3.34  | 3.18 |      |
| FLU3752   | 144132 | NM_144666    | 4112 | 0.06  | 0.57  | 0.32  | -0.93 | -0.85 | -0.58 | 0.97  | 1.61  | 0.59  | 0.94  | -3.25 | 3.17 |      |
| PP909     | 80301  | NM_025201    | 4113 | 0.21  | 0.87  | 0.45  | 0.10  | -0.47 | -0.66 | 0.17  | 1.61  | 1.39  | 1.54  | -1.03 | 3.17 |      |
| LOC38715  | 285456 | NM_178653    | 4114 | 1.27  | 1.54  | 1.09  | 0.44  | 0.88  | 0.84  | 1.68  | 1.84  | 1.63  | 3.90  | 1.63  | 3.17 |      |
| SEC131    | 6386   | NM_183152    | 4115 | 3.27  | 1.53  | 2.41  | -0.40 | 0.37  | 0.93  | 2.39  | 0.42  | 0.86  | 8.20  | 0.90  | 3.17 |      |
| SUC3A10   | 57181  | NM_020342    | 4116 | 1.94  | 0.67  | 0.46  | -0.79 | -0.20 | -0.67 | 1.77  | 0.46  | 0.94  | 3.08  | 1.65  | 3.17 |      |
| LOC389457 | 39457  | NM_001038008 | 4117 | 0.05  | 1.69  | 0.64  | 0.13  | 0.09  | 0.87  | 0.19  | 2.08  | 0.90  | 2.38  | 1.09  | 3.17 |      |
| RUC1      | 2362   | NM_014338    | 4118 | 1.78  | -1.16 | -1.36 | -0.87 | 0.96  | -1.16 | 0.92  | 1.16  | 0.96  | 5.86  | 0.65  | 3.17 |      |
| MNA       | 84864  | NM_153182    | 4119 | -0.48 | -0.81 | -0.64 | -1.32 | -0.97 | -1.37 | 1.46  | 0.55  | 1.16  | -1.93 | -3.66 | 3.17 |      |
| TGM6      | 343641 | NM_198994    | 4120 | 1.88  | 0.14  | 0.19  | -0.38 | 0.15  | -0.42 | 0.46  | 2.49  | 0.21  | 2.69  | -0.65 | 3.16 |      |
| FABP7     | 217    | NM_010446    | 4121 | 1.20  | 1.54  | 1.64  | 0.58  | 0.23  | 0.13  | 1.20  | 1.54  | 1.64  | 7.70  | 1.70  | 3.16 |      |
| LOC19137  | 91137  | NM_138773    | 4122 | 2.35  | 1.33  | 1.64  | -0.05 | 0.06  | -0.34 | 1.19  | 0.39  | 1.58  | 5.33  | 0.3   |      |      |

|           |        |              |      |       |       |       |       |       |       |       |      |       |       |       |      |
|-----------|--------|--------------|------|-------|-------|-------|-------|-------|-------|-------|------|-------|-------|-------|------|
| GEA       | 2669   | NM_181702    | 4205 | 2.21  | 1.98  | 0.31  | 0.03  | -0.48 | 0.25  | 1.89  | 1.42 | -0.23 | 4.50  | -0.19 | 3.08 |
| PERNS4    | 2889   | NM_0010423   | 4206 | 1.79  | 1.15  | 0.60  | 0.02  | 0.02  | -0.05 | 1.89  | 1.22 | 0.52  | 4.55  | -0.26 | 3.08 |
| ORS1F1    | 26892  | NM_001004752 | 4207 | 0.12  | -0.31 | -1.05 | -0.94 | 0.34  | 0.17  | 1.13  | 2.50 | 0.55  | -1.24 | -0.43 | 3.08 |
| COLA42    | 1284   | NM_001846    | 4208 | 0.48  | 1.58  | 2.04  | 1.93  | 0.01  | 1.08  | 0.30  | 2.03 | 0.75  | 4.10  | 3.01  | 3.08 |
| LOC39940  | 89940  | NM_174920    | 4209 | 15.48 | 15.73 | 10.80 | 5.45  | 5.07  | 4.11  | 1.33  | 1.07 | 0.68  | 40.01 | 14.62 | 3.08 |
| COOY      | 1022   | NM_016138    | 4210 | 0.33  | 0.42  | 0.26  | 0.10  | 0.01  | 1.52  | 1.42  | 0.01 | 0.01  | 4.20  | 0.27  | 3.08 |
| LOC751071 | 751071 | NM_001043229 | 4211 | 0.28  | 1.03  | 2.23  | 1.16  | 0.34  | -0.32 | -0.04 | 0.91 | 2.21  | 3.54  | 1.18  | 3.08 |
| SPR21P    | 9169   | NM_004719    | 4212 | -0.16 | 0.58  | 1.10  | 0.33  | -0.08 | -0.05 | 0.20  | 1.14 | 1.73  | 1.52  | 0.21  | 3.08 |
| PRNA      | 8992   | NM_024662    | 4213 | 1.33  | 1.36  | 1.26  | 0.22  | 1.33  | 1.36  | 0.29  | 2.44 | 0.59  | 1.87  | 3.87  | 1.47 |
| PRSS21    | 10942  | NM_144957    | 4214 | 0.02  | 0.16  | -0.06 | -0.22 | -0.58 | -0.07 | 0.33  | 1.15 | 1.59  | 0.13  | -1.67 | 3.07 |
| CLN7      | 1366   | NM_001307    | 4215 | 0.94  | 2.03  | 1.56  | -0.45 | -0.20 | 0.00  | 0.99  | 1.54 | 0.53  | 4.52  | -0.65 | 3.07 |
| TGRC1     | 1012   | NM_001307    | 4216 | 0.82  | 0.23  | -0.27 | -0.15 | 0.75  | -0.25 | 0.77  | 0.46 | 0.23  | 0.31  | -0.89 | 3.07 |
| ZNF505    | 81931  | NM_031218    | 4217 | 0.77  | 0.37  | 1.20  | 0.58  | -0.47 | -0.26 | 1.09  | 0.80 | 1.18  | 2.34  | 1.32  | 3.07 |
| MAGEA3    | 4102   | NM_005362    | 4218 | 1.15  | 1.61  | 1.50  | -0.29 | -0.18 | -0.17 | 0.72  | 1.01 | 1.34  | 4.26  | -0.64 | 3.07 |
| IFG43     | 8672   | NM_003760    | 4219 | 2.00  | 2.48  | 1.87  | 0.23  | -0.50 | 0.90  | 0.87  | 2.01 | 0.19  | 5.35  | 0.63  | 3.07 |
| B5SAT3    | 26232  | NM_012200    | 4220 | 0.75  | -0.19 | -0.77 | -0.62 | 0.82  | -0.31 | 1.95  | 1.03 | 0.88  | 0.21  | -1.77 | 3.07 |
| TRIM55    | 84675  | NM_184087    | 4221 | 2.00  | 0.50  | 0.93  | -0.09 | -0.01 | -0.50 | 1.69  | 0.23 | 1.15  | 3.43  | -0.59 | 3.07 |
| INCENP    | 3619   | NM_020238    | 4222 | 0.87  | 0.89  | 0.89  | -0.50 | -0.93 | 0.00  | 0.32  | 2.24 | 0.50  | 2.65  | -1.44 | 3.07 |
| RRM2      | 51654  | NM_010624    | 4223 | -0.47 | -0.78 | -0.52 | -1.78 | -1.32 | 2.02  | 1.13  | 0.24 | 1.59  | -1.58 | -5.12 | 3.06 |
| PTGR      | 5799   | NM_000960    | 4224 | 1.45  | 1.48  | 0.87  | -0.25 | -0.26 | -0.39 | 0.79  | 1.09 | 1.18  | 3.80  | -0.89 | 3.06 |
| RGNF      | 64283  | NM_173755    | 4225 | 0.34  | 2.40  | 1.78  | 0.59  | 0.17  | -0.03 | -0.03 | 1.83 | 1.26  | 4.52  | 0.72  | 3.06 |
| MG42367   | 34898  | NM_207362    | 4226 | 1.73  | -0.23 | 2.55  | 0.55  | -0.13 | 0.81  | 0.55  | 1.60 | 0.91  | 4.05  | 1.22  | 3.06 |
| PR99      | 5468   | NM_005037    | 4227 | 0.25  | 0.31  | -0.44 | -1.09 | -1.43 | -1.48 | 1.49  | 1.05 | 0.52  | 0.12  | -4.00 | 3.06 |
| ZADH1     | 145482 | NM_152444    | 4228 | 0.30  | 0.71  | 0.04  | -0.46 | -0.43 | -0.47 | 1.13  | 1.16 | 0.77  | 1.05  | -1.35 | 3.06 |
| FLU1008   | 55677  | NM_017969    | 4229 | 0.70  | 1.46  | 1.53  | -0.26 | -0.42 | 0.33  | 0.69  | 1.53 | 0.84  | 1.70  | -0.35 | 3.06 |
| MGC04895  | 112936 | NM_002495    | 4230 | 0.25  | 0.49  | 0.98  | -0.38 | -1.20 | -0.24 | 0.50  | 1.49 | 1.06  | 1.71  | -1.83 | 3.06 |
| PC326     | 55827  | NM_001017977 | 4231 | -0.09 | 0.47  | -0.06 | -0.88 | -0.14 | -0.63 | 0.80  | 0.86 | 1.40  | 0.32  | -1.74 | 3.05 |
| MGC27169  | 138094 | NM_176782    | 4232 | 0.43  | 0.54  | -0.51 | -0.80 | -1.20 | -0.80 | 1.08  | 1.49 | 0.48  | 0.47  | -2.80 | 3.05 |
| TAF4A     | 151467 | NM_010055227 | 4233 | 0.62  | 1.03  | 1.15  | 0.51  | -0.12 | 1.68  | 0.21  | 1.02 | 1.15  | 1.45  | 1.49  | 3.05 |
| TLX1A     | 8115   | NM_021866    | 4234 | 0.50  | 1.68  | 2.26  | 0.92  | 1.17  | -0.18 | 1.72  | 0.05 | 1.29  | 8.44  | 1.90  | 3.05 |
| ADAMTS8   | 11095  | NM_007037    | 4235 | 0.88  | -0.15 | 0.64  | 1.00  | 0.54  | -0.36 | 0.91  | 0.74 | 1.40  | 1.38  | 1.17  | 3.05 |
| C16ORF26  | 25565  | NM_001799    | 4236 | 0.22  | 0.20  | -0.59 | -0.20 | -0.59 | -0.20 | 0.22  | 0.59 | -0.20 | 1.43  | -0.29 | 3.05 |
| PDR       | 10954  | NM_006810    | 4237 | 0.88  | 1.26  | -0.53 | -1.06 | -0.80 | -1.03 | 1.18  | 1.66 | 0.21  | 1.60  | -2.90 | 3.05 |
| CORD1A    | 11151  | NM_007074    | 4238 | -1.15 | 0.32  | 0.71  | -0.89 | -0.54 | -0.40 | 0.78  | 0.72 | 1.55  | 0.89  | -1.82 | 3.05 |
| MGC11818  | 92595  | NM_034140    | 4239 | 0.88  | 2.33  | 0.18  | 1.95  | -0.26 | 0.21  | 1.69  | 1.14 | 0.22  | 4.39  | 1.91  | 3.05 |
| PRX1      | 6486   | NM_178181    | 4240 | 1.76  | 1.70  | 1.80  | 1.48  | 0.10  | 1.80  | 0.10  | 1.80 | 0.10  | 2.95  | 1.92  | 3.04 |
| CTDORF28A | 51622  | NM_015622    | 4241 | 1.02  | 0.79  | 0.08  | -0.43 | -0.33 | 0.56  | 1.72  | 1.31 | 0.02  | 1.89  | -2.00 | 3.04 |
| SPF4      | 6729   | NM_003136    | 4242 | 3.43  | 1.98  | 0.35  | -0.80 | 0.30  | -0.27 | 1.93  | 0.49 | 0.62  | 5.76  | -0.77 | 3.04 |
| WDR15A    | 51168  | NM_021239    | 4243 | 0.50  | 1.25  | 0.95  | -0.10 | -0.29 | 0.52  | 1.25  | 0.95 | 0.25  | 2.95  | 0.35  | 3.04 |
| NICE-3    | 25912  | NM_138740    | 4244 | -0.04 | 0.45  | 0.37  | -1.43 | -1.29 | -0.98 | 1.04  | 0.86 | 1.15  | 0.78  | -3.71 | 3.04 |
| LOC658499 | 63499  | NM_001042507 | 4245 | 0.07  | -0.64 | -0.24 | -1.83 | -2.46 | -1.12 | 1.50  | 1.06 | 0.48  | -0.81 | -5.40 | 3.04 |
| PRDM9     | 574    | NM_001042507 | 4246 | -1.38 | -1.48 | -1.41 | -2.14 | -2.14 | -2.14 | 1.50  | 1.06 | 0.48  | -0.81 | -5.40 | 3.04 |
| ANKRD11   | 29123  | NM_013275    | 4247 | 4.06  | 1.00  | 1.40  | 0.78  | 0.53  | 1.53  | 1.60  | 1.46 | 0.02  | 8.47  | 2.84  | 3.04 |
| TOMM70A   | 9868   | NM_014820    | 4248 | 0.60  | 0.59  | -0.23 | -0.14 | -0.53 | -0.80 | 1.49  | 1.07 | 0.48  | 0.96  | -1.47 | 3.04 |
| DXDC6     | 118460 | NM_058219    | 4249 | 0.68  | 0.23  | 0.54  | 0.16  | -0.03 | -1.32 | 0.58  | 0.25 | 2.20  | 1.45  | -1.19 | 3.03 |
| WAP       | 792    | NM_004238    | 4250 | 0.44  | 0.47  | 0.23  | -0.02 | 0.89  | 0.23  | 0.89  | 0.23 | 0.89  | 0.23  | 0.89  | 0.23 |
| FYN       | 2534   | NM_153048    | 4251 | 1.06  | 0.41  | 1.59  | -0.42 | 0.08  | 0.05  | 1.48  | 0.25 | 1.30  | 3.06  | -0.29 | 3.03 |
| MH40152   | 9761   | NM_014790    | 4252 | 1.52  | 0.51  | 0.08  | -0.66 | 0.19  | -0.98 | 1.71  | 0.67 | 0.65  | 2.10  | -1.45 | 3.03 |
| CHD9      | 8025   | NM_021234    | 4253 | 1.24  | 0.87  | 1.80  | 0.17  | 0.17  | 0.17  | 1.78  | 0.87 | 1.24  | 2.20  | 2.12  | 3.03 |
| HSPC051   | 29796  | NM_011387    | 4254 | 0.44  | -0.15 | 1.30  | -1.18 | 1.01  | -0.40 | 1.40  | 0.01 | 1.64  | 1.60  | 0.79  | 3.03 |
| AGPS      | 8540   | NM_003659    | 4255 | 1.91  | 0.69  | 1.14  | -0.41 | -0.04 | -0.35 | 2.09  | 0.33 | 0.60  | 3.76  | -0.80 | 3.03 |
| ADP1      | 650    | NM_001042507 | 4256 | 0.50  | 0.23  | 0.61  | 0.50  | 0.10  | -0.39 | 0.77  | 0.88 | 1.40  | 1.86  | -1.25 | 3.03 |
| VNIRS     | 31705  | NM_173858    | 4257 | 0.22  | 0.47  | 0.63  | -0.37 | -1.00 | -0.96 | 0.15  | 1.50 | 1.38  | 1.33  | -2.33 | 3.03 |
| HTC37     | 58497  | NM_021222    | 4258 | -0.41 | -0.72 | 0.04  | -0.96 | -0.85 | -1.00 | 0.88  | 0.16 | 1.98  | -1.08 | -2.87 | 3.02 |
| CHC1      | 5344   | NM_00109840  | 4259 | 1.68  | 1.44  | 1.14  | -0.09 | -0.29 | 0.10  | 1.11  | 1.48 | 0.41  | 4.25  | -0.22 | 3.02 |
| ADP4099   | 9009   | NM_144568    | 4260 | 0.54  | 0.97  | 0.11  | 0.15  | 0.09  | 0.88  | 0.68  | 0.47 | 2.82  | 2.82  | 1.11  | 3.02 |
| ALDH1A1   | 216    | NM_000689    | 4261 | 2.37  | 3.41  | 0.88  | -0.18 | 0.91  | 0.00  | 1.36  | 1.12 | 0.54  | 6.63  | 3.73  | 3.02 |
| AGP4      | 361    | NM_004028    | 4262 | 0.08  | 1.51  | -0.17 | -0.41 | -0.70 | -0.28 | 0.19  | 2.38 | 0.45  | 1.42  | -1.38 | 3.02 |
| MGC32057  | 12074  | NM_019317    | 4263 | 0.22  | 0.05  | 0.62  | 0.22  | 0.40  | 0.62  | 0.22  | 0.40 | 0.62  | 0.40  | 0.15  | 3.02 |
| SRA1      | 10011  | NM_00103235  | 4264 | 0.86  | 0.98  | 0.58  | 0.70  | -0.97 | -0.76 | 0.92  | 1.30 | 0.80  | 2.43  | -2.42 | 3.02 |
| HIF-5     | 28988  | NM_00104436  | 4265 | 1.37  | 1.02  | 0.38  | 0.05  | -0.83 | 0.28  | 1.07  | 1.58 | 0.37  | 2.77  | -0.51 | 3.01 |
| TRAF1     | 11177  | NM_010168    | 4266 | 0.34  | 1.40  | 0.45  | 0.43  | -0.54 | 0.65  | 0.43  | 2.21 | 0.40  | 2.08  | -0.26 | 3.01 |
| NOG       | 9241   | NM_005450    | 4267 | 0.25  | -0.11 | -0.80 | -1.85 | -1.19 | -0.63 | 2.21  | 1.19 | 0.40  | -0.66 | -0.67 | 3.01 |
| LOC348174 | 348174 | NM_182619    | 4268 | 3.22  | 1.97  | 1.35  | 0.65  | 1.82  | 1.24  | 2.22  | 0.51 | 0.28  | 6.54  | 3.71  | 3.01 |
| ORS12     | 90064  | NM_00104754  | 4269 | 0.90  | 0.91  | -0.83 | -0.90 | -0.33 | -1.08 | 2.23  | 1.29 | -0.51 | 0.99  | -2.30 | 3.01 |
| FADS2     | 945    | NM_004025    | 4270 | 0.55  | 0.67  | 0.45  | 0.55  | 0.67  | 0.45  | 0.55  | 0.67 | 0.45  | 0.77  | 0.36  | 3.01 |
| RAB38A1   | 22930  | NM_012233    | 4271 | -0.41 | 0.16  | 0.27  | -0.70 | -0.51 | -0.64 | 0.47  | 1.30 | 1.24  | 0.03  | -1.86 | 3.01 |
| HMGC51    | 3157   | NM_002130    | 4272 | 1.15  | 1.16  | 1.43  | 0.09  | 0.17  | 0.45  | 0.88  | 1.70 | 0.43  | 3.74  | 0.72  | 3.01 |
| FLI1403   | 7914   | NM_004089    | 4273 | 0.13  | 0.04  | 0.66  | 0.13  | 0.04  | 0.66  | 0.13  | 0.04 | 0.66  | 0.13  | 0.04  | 0.66 |
| ZNF629    | 23361  | NM_00108047  | 4274 | -0.14 | 0.52  | 0.23  | -1.18 | -0.01 | -0.50 | 1.46  | 0.67 | 0.88  | 0.62  | -1.69 | 3.01 |
| GIP       | 10146  | NM_198395    | 4275 | 0.26  | 0.28  | 0.99  | 0.08  | -0.14 | -0.52 | 0.41  | 0.42 | 2.18  | 1.53  | -0.58 | 3.01 |
| ANKRD21   | 31774  | NM_001081    | 4276 | 1.07  | 0.35  | 0.05  | -1.33 | -1.10 | 1.29  | 1.17  | 1.29 | 1.17  | 1.47  | -1.12 | 3.01 |
| TRP       | 5727   | NM_000264    | 4277 | 1.61  | 1.52  | 1.75  | 0.05  | -0.22 | 0.50  | 0.75  | 1.39 | 0.86  | 4.88  | 0.23  | 3.00 |
| RPL24     | 6152   | NM_000986    | 4278 | -1.49 | -0.67 | -0.72 | -2.10 | -2.40 | -2.36 | -0.65 | 2.10 | 1.55  | -2.88 | -6.87 | 3.00 |
| RN183     | 138805 | NM_145051    | 4279 | 5.88  | 31.74 | 10.76 | 0.12  | 2.68  | 0.31  | 0.75  | 0.66 | 1.58  | 28.38 | 3.11  | 3.00 |
| RAI1      | 8454   | NM_003092    | 4280 | 0.90  | 0.06  | 0.46  | 0.60  | 0.57  | 0.60  | 1.34  | 0.60 | 0.57  | 1.31  | 0.48  | 3.00 |
| CGI-30    | 51611  | NM_015958    | 4281 | 1.17  | 1.09  | 1.05  | -0.50 | -0.59 | -0.59 | 0.84  | 1.19 | 0.97  | 3.30  | -1.69 | 3.00 |
| RPN1      | 54763  | NM_017578    | 4282 | -0.10 | -0.47 | -0.27 | -1.34 | -1.57 | -1.23 | 1.06  | 0.44 | 1.50  | -0.84 | -1.43 | 3.00 |
| CRG       | 889    | NM_000851    | 4283 | 0.81  | 1.52  | 1.48  | 0.55  | 0.48  | 0.55  | 0.48  | 0.55 | 0.48  | 3.80  | 1.25  | 3.00 |
| TRIP      | 10293  | NM_005879    | 4284 | 0.59  | 0.86  | 0.88  | -0.98 | -1.10 | -0.80 | 0.68  | 1.36 | 0.96  | 2.33  | -2.88 | 3.00 |
| FAM81     | 2168   | NM_001443    | 4285 |       |       |       |       |       |       |       |      |       |       |       |      |

|              |        |              |      |       |       |       |       |       |       |       |       |       |       |       |      |
|--------------|--------|--------------|------|-------|-------|-------|-------|-------|-------|-------|-------|-------|-------|-------|------|
| PSCD4        | 27328  | NM_013385    | 4867 | 1.62  | 2.93  | 1.15  | -0.36 | 0.14  | -0.14 | 0.80  | 1.35  | 0.77  | 5.68  | -0.37 | 2.92 |
| PP1          | 5489   | NM_021705    | 4868 | 0.82  | 0.88  | 1.15  | -0.17 | -0.18 | 0.04  | 0.71  | 1.38  | 0.71  | 5.20  | -0.44 | 2.81 |
| TMEM8        | 58986  | NM_021259    | 4869 | 0.40  | 0.57  | -0.09 | -0.19 | -0.82 | -1.16 | 0.45  | 1.70  | 0.76  | 0.87  | -1.17 | 2.91 |
| LOC16238     | 116238 | NM_138463    | 4870 | 1.80  | 0.96  | 1.60  | -0.27 | -0.16 | -0.52 | 0.80  | 0.37  | 1.74  | 4.36  | -0.95 | 2.91 |
| RMYS1A       | 5940   | NM_00107526  | 4871 | 2.02  | 1.22  | 2.70  | -0.28 | 0.23  | -0.02 | 1.31  | 0.08  | 1.52  | 5.95  | -0.07 | 2.91 |
| CDX2         | 371    | NM_02291     | 4872 | 0.94  | 1.50  | 0.81  | -0.30 | 0.81  | -0.90 | 0.81  | 2.35  | 0.80  | 3.00  | 0.03  | 2.91 |
| FLJ25056     | 196446 | NM_00716650  | 4873 | 0.43  | 0.42  | 1.35  | -0.78 | -0.68 | -0.58 | 0.64  | 0.33  | 1.94  | 2.20  | -2.04 | 2.91 |
| DCX          | 1633   | NM_000788    | 4874 | 2.20  | 2.36  | 1.86  | 0.89  | 0.70  | 0.66  | 0.35  | 1.92  | 0.64  | 7.62  | 2.24  | 2.91 |
| YF1          | 5212   | NM_053276    | 4875 | 1.49  | 0.87  | 0.87  | 0.49  | 0.40  | 0.80  | 0.49  | 2.53  | 0.74  | 5.87  | 0.95  | 2.91 |
| EGFLF        | 69809  | NM_206539    | 4876 | 1.07  | 1.18  | 0.59  | 0.26  | -0.85 | -0.38 | 0.19  | 2.08  | 0.63  | 2.85  | -0.98 | 2.91 |
| IGALS14      | 56801  | NM_020129    | 4877 | -0.20 | 0.64  | 0.21  | -1.36 | -1.32 | -0.69 | 0.54  | 1.71  | 0.66  | 0.65  | -0.38 | 2.91 |
| FLJ10094     | 56801  | NM_020129    | 4878 | 1.78  | 1.03  | 1.03  | -0.11 | -0.11 | 0.00  | 1.11  | 0.00  | 1.52  | 3.98  | -0.97 | 2.91 |
| CLK2         | 1196   | NM_001291    | 4879 | 0.44  | -0.53 | -0.54 | -1.34 | -0.95 | -0.99 | 1.60  | 0.47  | 0.84  | -1.52 | -3.28 | 2.90 |
| PRDX6        | 9588   | NM_004905    | 4880 | 1.06  | 5.74  | 1.13  | 1.97  | 1.99  | 1.01  | 1.76  | 1.56  | 0.42  | 11.93 | 4.88  | 2.90 |
| KCL1         | 6846   | NM_003175    | 4881 | 5.34  | 1.91  | 1.13  | -0.12 | 0.33  | 0.19  | 0.88  | 0.65  | 1.36  | 4.39  | 0.41  | 2.90 |
| NQX5F10      | 4716   | NM_000448    | 4882 | 1.06  | 0.91  | 0.85  | -0.06 | -0.79 | 0.71  | 2.16  | 0.82  | 0.88  | 2.82  | -0.13 | 2.90 |
| DZHG0H       | 728294 | NM_152783    | 4883 | 0.07  | 0.65  | 0.35  | -0.60 | -0.49 | -0.97 | 0.68  | 0.71  | 1.51  | 1.07  | -2.06 | 2.90 |
| COPEP        | 1316   | NM_001300    | 4884 | -0.44 | -0.54 | -1.06 | -1.64 | -1.23 | -0.97 | 1.95  | 0.95  | 0.01  | -2.03 | -3.84 | 2.90 |
| DUX5         | 26581  | NM_012149    | 4885 | 2.44  | 2.81  | 2.05  | 1.48  | 0.09  | 0.92  | 0.49  | 1.63  | 0.77  | 7.30  | 2.49  | 2.90 |
| UNQ470       | 375704 | NM_198573    | 4886 | -0.25 | -0.78 | -1.37 | -1.50 | -1.63 | -1.55 | 1.68  | 1.34  | -0.12 | -2.40 | -4.68 | 2.90 |
| RAB23        | 51715  | NM_183227    | 4887 | 0.92  | 0.44  | 0.92  | -0.94 | -1.04 | -0.48 | 1.02  | 1.17  | 0.71  | 2.28  | -2.46 | 2.90 |
| LOC41152     | 401152 | NM_001001701 | 4888 | 1.51  | 1.63  | 1.40  | 0.42  | -0.67 | -0.65 | 0.20  | 1.25  | 1.45  | 4.54  | -0.91 | 2.90 |
| CR1          | 10903  | NM_181873    | 4889 | -0.05 | 0.62  | 0.66  | -0.23 | -1.19 | -0.42 | 0.12  | 1.81  | 1.21  | 1.22  | 1.84  | 2.90 |
| ASL4         | 121549 | NM_203436    | 4890 | -0.49 | 0.58  | 0.28  | -1.40 | -1.35 | -1.31 | 0.34  | 1.55  | 1.01  | 0.38  | -4.06 | 2.90 |
| HP1R         | 9026   | NM_003959    | 4891 | -0.11 | -0.23 | 0.39  | -1.06 | -1.30 | -1.43 | 0.45  | 0.81  | 1.64  | -0.16 | -1.76 | 2.90 |
| LONP         | 83792  | NM_031890    | 4892 | 0.77  | 0.44  | 0.07  | -0.21 | -0.16 | -0.07 | 1.03  | 0.69  | 1.17  | 1.28  | -1.04 | 2.89 |
| RNF19        | 25807  | NM_015435    | 4893 | 7.25  | 4.51  | 5.80  | 1.40  | 0.77  | 0.61  | 1.46  | 0.45  | 0.98  | 17.56 | 2.78  | 2.89 |
| KDH          | 7498   | NM_000079    | 4894 | 1.27  | 1.44  | 1.25  | 0.43  | -0.04 | -0.46 | 1.48  | 0.63  | 0.79  | 3.96  | -0.92 | 2.89 |
| TSS2L4       | 5082   | NM_016044    | 4895 | 1.37  | 2.68  | 0.84  | -1.11 | 1.01  | -0.35 | 1.24  | 0.66  | 1.14  | 8.17  | 1.02  | 2.89 |
| CAPN9        | 10753  | NM_006615    | 4896 | 0.92  | 0.44  | 0.65  | -0.17 | -0.47 | -1.24 | 0.56  | 0.59  | 1.75  | 2.02  | -1.88 | 2.89 |
| C10ORF9      | 219771 | NM_181698    | 4897 | 2.67  | 10.39 | 1.51  | 4.96  | 1.95  | 2.76  | -0.47 | 4.04  | 0.67  | 14.57 | 9.67  | 2.89 |
| NRARP11      | 34369  | NM_00113631  | 4898 | -0.79 | -0.70 | -0.90 | -0.89 | -1.24 | -1.39 | 1.22  | 1.48  | 0.11  | -2.39 | -5.26 | 2.89 |
| HR23A1       | 1282   | NM_001845    | 4899 | 1.74  | 0.57  | 1.34  | -0.02 | -0.36 | -0.62 | 1.58  | 0.08  | 1.22  | 3.65  | -0.99 | 2.89 |
| HT08         | 55852  | NM_018469    | 4900 | 0.98  | 1.03  | 1.69  | -0.49 | -0.30 | -0.47 | 1.38  | 0.76  | 0.74  | 3.70  | -0.31 | 2.88 |
| MGC55097     | 209492 | NM_173546    | 4901 | 0.00  | 0.96  | 1.40  | -0.24 | -0.16 | 0.74  | -0.31 | 1.24  | 1.95  | 2.35  | -1.13 | 2.88 |
| FLJ3874      | 285368 | NM_207511    | 4902 | 0.02  | 0.97  | 0.51  | -1.67 | -1.07 | -1.07 | 1.62  | 0.67  | 0.54  | 1.34  | -3.50 | 2.88 |
| MEP50        | 79084  | NM_024102    | 4903 | 3.47  | 1.88  | 1.85  | 1.10  | 1.56  | 0.55  | 1.48  | 1.06  | 0.34  | 7.20  | 3.21  | 2.88 |
| DOK4         | 55715  | NM_018110    | 4904 | 0.40  | 0.78  | 0.23  | -1.10 | -0.55 | -0.06 | 1.15  | 1.38  | 0.36  | 1.42  | -1.71 | 2.88 |
| SDS25        | 390075 | NM_01001822  | 4905 | 0.70  | 1.44  | 1.43  | 0.59  | 0.85  | 0.58  | 0.45  | 1.58  | 0.45  | 2.47  | 1.94  | 2.88 |
| ANXA11       | 311    | NM_001157    | 4906 | 3.47  | 0.87  | 0.56  | -0.39 | 0.23  | 0.27  | 2.55  | 0.07  | 0.27  | 4.90  | 0.11  | 2.88 |
| ACM5D        | 130013 | NM_138326    | 4907 | 2.24  | 1.74  | 0.72  | 0.30  | 0.31  | 0.04  | 1.33  | 0.91  | 0.64  | 4.70  | 0.64  | 2.88 |
| LC37A3       | 84255  | NM_021395    | 4908 | 0.89  | 1.18  | 0.89  | -0.42 | -0.60 | -1.24 | 0.62  | 1.24  | 2.96  | 1.46  | -1.26 | 2.88 |
| FBN2         | 2139   | NM_001998    | 4909 | 4.78  | 0.25  | 1.37  | -0.68 | 0.03  | -0.63 | 2.31  | -0.15 | 0.71  | 6.40  | -1.28 | 2.88 |
| APOL6        | 80830  | NM_030641    | 4910 | -0.10 | 0.71  | 1.12  | 0.37  | 0.29  | -0.20 | 0.18  | 0.40  | 2.65  | 1.73  | -0.04 | 2.87 |
| RTD1         | 8634   | NM_003729    | 4911 | 0.43  | -0.71 | 0.35  | -1.42 | -1.09 | -1.40 | 0.54  | 0.40  | 1.94  | -0.99 | -0.90 | 2.87 |
| ELBA         | 10136  | NM_005747    | 4912 | 1.24  | 1.24  | 1.20  | -0.05 | 1.07  | 1.00  | 0.05  | 1.07  | 0.82  | 1.51  | 0.96  | 2.87 |
| GM5          | 3004   | NM_005317    | 4913 | 0.95  | 2.35  | -0.22 | -0.76 | 0.10  | -0.95 | 1.48  | 1.01  | 0.38  | 3.08  | -1.61 | 2.87 |
| RA5D         | 10111  | NM_133482    | 4914 | 0.56  | 1.76  | 0.08  | -0.50 | -0.80 | -0.04 | 0.42  | 2.49  | -0.04 | 2.40  | -1.33 | 2.87 |
| GLDND3       | 8427   | NM_178236    | 4915 | 0.68  | 1.04  | 0.57  | 0.88  | 0.81  | 0.81  | 0.88  | 1.17  | 0.84  | 2.47  | 1.84  | 2.87 |
| GCHR         | 2644   | NM_005258    | 4916 | 0.42  | 0.51  | 0.58  | -1.22 | -1.26 | -0.74 | 1.33  | 1.02  | 0.52  | 1.50  | -3.22 | 2.87 |
| GRK6         | 2870   | NM_00104005  | 4917 | 0.31  | 0.00  | -0.41 | -1.72 | -0.89 | -0.07 | 1.96  | 1.07  | -0.16 | -0.10 | -2.54 | 2.87 |
| FHM2         | 3415   | NM_200564    | 4918 | 1.83  | 1.24  | 1.26  | 0.87  | 1.14  | 0.89  | 1.55  | 0.89  | 0.38  | 4.48  | 0.90  | 2.87 |
| ALDH9A1      | 223    | NM_000696    | 4919 | 1.40  | 2.22  | 1.06  | 1.47  | 0.79  | 0.56  | 0.48  | 1.68  | 0.71  | 4.68  | 2.81  | 2.86 |
| MVEOY        | 26579  | NM_138768    | 4920 | 1.03  | 0.73  | 0.71  | 0.15  | -0.32 | -0.30 | 1.54  | 0.82  | 0.50  | 2.47  | -0.47 | 2.86 |
| LOC222967    | 222967 | NM_173565    | 4921 | 0.49  | -0.38 | -0.90 | -0.52 | -1.28 | -1.33 | 2.47  | 0.52  | -0.13 | -0.80 | -1.13 | 2.86 |
| CALM4        | 502    | NM_001743    | 4922 | 0.75  | 1.54  | 1.79  | 0.38  | 0.25  | 0.04  | 0.62  | 0.94  | 0.82  | 1.43  | 0.31  | 2.86 |
| RP11-413M1.2 | 728489 | NM_00108049  | 4923 | -0.26 | -0.08 | -0.52 | -1.44 | -1.52 | -0.67 | 1.15  | 1.30  | 0.41  | -0.86 | -3.64 | 2.86 |
| RAT1E        | 135250 | NM_139165    | 4924 | 0.65  | 1.66  | 0.51  | -0.30 | 0.15  | -0.57 | 0.94  | 1.24  | 0.69  | 2.82  | -0.71 | 2.86 |
| NAP1D        | 22236  | NM_018990    | 4925 | 2.41  | 1.17  | 1.27  | 0.22  | 0.17  | 0.62  | 1.17  | 0.62  | 1.42  | 4.86  | 1.02  | 2.86 |
| SLC37A4      | 2542   | NM_001467    | 4926 | -1.08 | -0.62 | -0.96 | -1.79 | -2.00 | -2.09 | 0.60  | 1.12  | 1.14  | -2.66 | -5.89 | 2.86 |
| CYS171       | 10800  | NM_006639    | 4927 | 2.33  | 2.12  | 1.99  | 0.36  | 0.69  | 0.83  | 1.22  | 0.73  | 0.90  | 6.44  | -1.87 | 2.86 |
| C58A         | 325    | NM_071827    | 4928 | 0.10  | 0.09  | 0.03  | -1.09 | -0.35 | -0.16 | 1.81  | 0.38  | 0.26  | 0.17  | -1.28 | 2.85 |
| HD           | 3064   | NM_002111    | 4929 | 1.36  | 1.95  | -0.16 | -0.04 | 0.56  | -0.14 | 1.86  | 1.27  | -0.28 | 3.14  | 0.38  | 2.85 |
| HIFOO        | 132343 | NM_153833    | 4930 | -0.60 | -0.69 | -1.01 | -1.57 | -0.74 | -2.07 | 0.45  | 0.60  | 1.80  | -2.29 | -4.38 | 2.85 |
| PWWP1        | 154150 | NM_138574    | 4931 | -0.27 | -0.23 | -0.15 | -0.96 | -0.79 | -0.69 | 0.54  | 1.17  | 1.13  | -0.69 | -4.44 | 2.85 |
| USP9FR       | 51735  | NM_018340    | 4932 | 1.10  | 0.85  | 0.50  | 0.57  | 0.66  | 0.56  | 0.46  | 0.59  | 0.24  | 3.46  | 0.65  | 2.85 |
| C19ORF22     | 102008 | NM_005800    | 4933 | -1.20 | -1.12 | -0.15 | -1.08 | -2.61 | -1.93 | 0.29  | 1.26  | 1.30  | -2.47 | -7.60 | 2.85 |
| SART1        | 9092   | NM_005146    | 4934 | -1.12 | 0.38  | 0.70  | -1.33 | -0.91 | -1.08 | 0.40  | 0.90  | 1.55  | 0.96  | -3.32 | 2.85 |
| LOC113655    | 113655 | NM_138411    | 4935 | 0.46  | 2.18  | 2.00  | 0.29  | 0.20  | 0.29  | 0.49  | 0.20  | 0.20  | 1.64  | 1.06  | 2.84 |
| DMO          | 1756   | NM_004019    | 4936 | 1.74  | 0.00  | 2.80  | 0.44  | 0.73  | 0.61  | 1.87  | -0.38 | 1.36  | 4.54  | 1.79  | 2.84 |
| GRIN2D       | 2906   | NM_000836    | 4937 | -0.46 | 0.37  | 0.02  | 0.12  | -0.79 | -0.57 | -0.49 | 1.78  | 1.56  | -0.07 | -1.25 | 2.84 |
| LOC40929     | 145447 | NM_181841    | 4938 | -0.48 | -0.16 | -0.87 | -1.47 | -0.88 | -1.37 | 0.47  | 0.88  | 1.43  | -1.43 | -4.25 | 2.84 |
| ACAT2        | 91     | NM_005091    | 4939 | 1.41  | 0.48  | 0.71  | -0.37 | -0.61 | -0.66 | 1.29  | 0.55  | 1.00  | 2.60  | -1.64 | 2.84 |
| WNT2B        | 7482   | NM_024494    | 4940 | 0.01  | -0.50 | -0.67 | -1.18 | -0.67 | -0.48 | 2.50  | 0.50  | -0.16 | -1.16 | -1.37 | 2.84 |
| DNAC1        | 3338   | NM_005528    | 4941 | 1.41  | 0.28  | 0.94  | 0.17  | 0.03  | 0.21  | 0.47  | 1.25  | 1.12  | 2.62  | 0.41  | 2.84 |
| SMX4E        | 972    | NM_024831    | 4942 | 0.48  | 0.40  | 0.76  | 0.83  | 0.80  | 0.76  | 1.42  | 1.14  | 0.74  | 3.14  | 0.74  | 2.84 |
| IGFBP1       | 3484   | NM_001013029 | 4943 | -0.32 | -0.23 | 0.29  | -0.96 | -1.17 | -1.12 | 0.09  | 0.78  | 1.97  | -0.26 | -3.25 | 2.84 |
| LOC27616128  | 144348 | NM_152437    | 4944 | 1.30  | 1.12  | 0.28  | -0.59 | 0.29  | -0.07 | 1.73  | 0.90  | 0.21  | 2.70  | -0.36 | 2.83 |
| FLJ8301      | 25591  | NM_152421    | 4945 | 1.20  | 1.31  | 1.52  | 1.20  | 1.31  | 1.52  | 1.00  | 0.42  | 1.44  | 4.44  | 1.48  | 2.83 |
| USP1         | 7398   | NM_001017416 | 4946 | 1.64  | 0.28  | -0.16 | 0.02  | -0.37 | -0.15 | 1.71  | 0.95  | 0.17  | 1.76  | -1.19 | 2.83 |
| TM6B10       | 9168   | NM_021103    | 4947 |       |       |       |       |       |       |       |       |       |       |       |      |

|               |        |              |      |       |       |       |       |       |       |       |       |       |       |       |       |
|---------------|--------|--------------|------|-------|-------|-------|-------|-------|-------|-------|-------|-------|-------|-------|-------|
| MC6C          | 4175   | NM_005915    | 4529 | 0.59  | -0.23 | -0.18 | -0.34 | -0.06 | -0.80 | 1.69  | 0.70  | 0.36  | -0.18 | -0.70 | 2.75  |
| EL08          | 1919   | NM_025973    | 4530 | -1.37 | -0.42 | -0.55 | -1.17 | -2.18 | -0.97 | -0.07 | 1.67  | -0.53 | -2.34 | -2.22 | 2.58  |
| COLS43        | 50509  | NM_015719    | 4531 | 2.89  | 2.18  | 2.92  | 0.18  | 0.45  | 0.26  | 1.25  | 0.55  | 0.36  | 7.99  | 0.89  | 2.75  |
| HXC           | 3055   | NM_002110    | 4532 | 3.33  | 2.42  | 0.84  | -0.44 | 0.92  | 0.95  | 1.52  | 0.88  | 0.35  | 6.58  | 1.44  | 2.75  |
| SORL1         | 6653   | NM_003105    | 4533 | 4.09  | 2.96  | 1.64  | -0.47 | 1.85  | 1.48  | 1.75  | 0.30  | 0.70  | 5.08  | 2.84  | 2.75  |
| 5180R8        | 5138   | NM_085654    | 4534 | 0.45  | 0.01  | 0.05  | 0.43  | 0.55  | 0.01  | 0.29  | 0.53  | 0.92  | 0.51  | 1.65  | 2.75  |
| FLU2051       | 54888  | NM_017888    | 4535 | 1.53  | 0.98  | 2.13  | 0.04  | 0.11  | -0.11 | 0.58  | 0.46  | 1.71  | 4.63  | 0.05  | 2.75  |
| EMILN3        | 90187  | NM_052846    | 4536 | 0.23  | -0.01 | 0.56  | -1.21 | -0.71 | -1.24 | 0.51  | -0.12 | 2.36  | 0.78  | -1.16 | 2.75  |
| WYD-SB9       | 8465   | NM_050599    | 4537 | 1.12  | 1.67  | 0.42  | 0.12  | 1.87  | 0.62  | 1.02  | 0.42  | 0.59  | 2.21  | 0.78  | 2.75  |
| RNF166        | 115992 | NM_178841    | 4538 | 0.21  | 0.57  | 0.45  | -0.05 | -0.80 | -0.28 | 0.72  | 1.16  | 0.50  | 1.08  | 1.24  | 2.75  |
| PLERKH1       | 10979  | NM_006832    | 4539 | 1.39  | 1.30  | 2.39  | 0.22  | 1.67  | 1.34  | 0.63  | 0.17  | 1.95  | 5.07  | 3.23  | 2.75  |
| 147-KE2       | 547    | NM_002092    | 4540 | -0.71 | -0.70 | -0.05 | -0.46 | -0.71 | -0.40 | 0.18  | 0.12  | 0.18  | 1.18  | -1.46 | -1.53 |
| JTV1          | 7965   | NM_006303    | 4541 | 0.99  | 1.19  | 1.11  | -0.47 | -0.30 | -0.84 | 0.51  | 0.72  | 1.52  | 3.28  | -1.61 | 2.75  |
| ZNF584        | 201514 | NM_173548    | 4542 | -0.26 | 2.79  | 0.88  | 0.01  | 1.22  | 0.98  | 0.33  | 1.71  | 0.71  | 3.51  | 2.21  | 2.75  |
| VDGNL1        | 29532  | NM_052867    | 4543 | -0.70 | 0.22  | -0.55 | -1.25 | -1.39 | -1.22 | 0.23  | 1.13  | 0.39  | -1.04 | -3.85 | 2.75  |
| HPE1          | 117282 | NM_054111    | 4544 | -0.16 | 0.31  | 0.89  | -1.02 | -1.33 | -1.06 | 0.79  | 1.01  | 0.84  | 0.42  | 0.41  | 2.74  |
| OR1001        | 219960 | NM_001004471 | 4545 | 2.50  | 0.62  | 1.50  | 0.96  | -0.23 | 0.30  | 1.42  | 0.83  | 0.49  | 4.62  | 1.02  | 2.74  |
| RABEP1        | 9135   | NM_004703    | 4546 | 1.14  | 1.04  | 0.93  | 0.91  | -0.87 | -0.37 | 0.46  | 1.74  | 0.55  | 3.11  | -0.13 | 2.74  |
| PS48          | 5142   | NM_001027329 | 4547 | 0.57  | 1.49  | 1.02  | 0.60  | -0.18 | 0.23  | 0.62  | 1.29  | 0.83  | 3.08  | 0.66  | 2.74  |
| BETA2GALINAC  | 338707 | NM_178537    | 4548 | 2.53  | 0.95  | 1.02  | 0.09  | -0.26 | 0.02  | 1.55  | 0.63  | 0.57  | 4.50  | -0.16 | 2.74  |
| SAE1          | 10095  | NM_005500    | 4549 | 0.34  | 0.47  | 0.44  | -0.28 | -0.68 | -0.37 | 0.90  | 0.97  | 0.88  | 1.24  | -1.33 | 2.74  |
| ANGH511       | 9826   | NM_014784    | 4550 | 0.84  | 0.34  | -0.08 | -0.34 | 1.50  | 0.17  | 2.60  | -0.05 | 0.15  | 1.99  | 1.33  | 2.74  |
| APP3BETA      | 57180  | NM_020445    | 4551 | 2.10  | 1.39  | 1.53  | 0.72  | 0.56  | 0.61  | 0.94  | 0.53  | 1.27  | 5.02  | 1.89  | 2.74  |
| 15E12         | 283459 | NM_176818    | 4552 | 3.19  | 1.59  | 1.23  | -0.11 | 0.53  | -0.59 | 1.80  | 0.20  | 0.75  | 6.00  | -0.17 | 2.74  |
| SVS           | 6860   | NM_020783    | 4553 | 1.39  | 1.09  | 0.98  | -0.30 | -0.52 | -0.20 | 0.78  | 1.00  | 0.96  | 3.46  | -1.02 | 2.74  |
| KAL1344       | 57544  | NM_020784    | 4554 | -0.36 | 0.03  | 0.37  | -1.25 | -0.68 | -1.01 | 0.38  | 0.47  | 1.89  | 0.07  | -2.97 | 2.74  |
| MY5T4         | 23522  | NM_012130    | 4555 | 0.31  | 0.33  | -0.56 | -0.49 | -0.17 | -1.11 | 1.40  | 1.26  | 0.08  | 0.08  | -1.77 | 2.74  |
| SDC1          | 221935 | NM_01079653  | 4556 | -0.82 | -0.75 | 0.23  | -1.62 | -1.31 | -0.79 | 0.95  | 0.68  | 1.11  | 1.34  | -3.72 | 2.74  |
| LOC28         | 8657   | NM_002610    | 4557 | 0.97  | 1.02  | 1.80  | 0.65  | 0.17  | 2.68  | 0.15  | 0.17  | 0.26  | 2.92  | 1.89  | 2.74  |
| LOC38549      | 389549 | NM_01024613  | 4558 | -0.22 | 0.97  | -0.51 | -0.67 | -1.10 | -1.02 | 0.31  | 2.00  | 0.43  | -0.14 | -2.79 | 2.73  |
| FLU10379      | 55133  | NM_018079    | 4559 | 0.49  | 0.75  | 1.13  | 0.03  | 0.68  | 0.03  | 0.97  | 0.82  | 0.95  | 2.36  | 0.74  | 2.73  |
| NF552         | 7981   | NM_012102    | 4560 | 1.63  | 1.13  | 0.63  | -0.13 | -0.47 | -0.15 | 0.65  | 0.19  | 0.12  | 3.37  | -1.27 | 2.73  |
| POP1          | 10940  | NM_015029    | 4561 | -0.68 | -0.42 | -0.24 | -1.38 | -0.93 | -1.00 | 0.84  | 0.78  | 1.11  | -1.19 | -3.30 | 2.73  |
| KFBP3         | 2287   | NM_020213    | 4562 | 0.43  | 0.45  | -0.03 | -0.68 | -1.28 | -0.69 | 0.62  | 1.82  | 0.30  | 0.85  | -2.64 | 2.73  |
| ABC85         | 340273 | NM_178559    | 4563 | 0.40  | -0.07 | -0.22 | -1.35 | -0.92 | -1.28 | 1.32  | 0.41  | 1.00  | 0.11  | -3.54 | 2.73  |
| GG21          | 9092   | NM_016796    | 4564 | 0.98  | 0.47  | 0.36  | -0.16 | 0.89  | 0.72  | 0.62  | 0.12  | 1.74  | 4.02  | 0.08  | 2.73  |
| DKFZP434C245  | 25886  | NM_015426    | 4565 | -0.64 | -0.02 | -0.47 | -1.18 | -1.17 | -0.89 | 0.47  | 0.81  | 1.46  | -1.14 | -3.24 | 2.73  |
| SHANK2        | 22941  | NM_133266    | 4566 | 3.56  | 1.62  | 1.77  | 0.74  | 0.48  | 0.15  | 1.30  | 0.52  | 0.91  | 6.95  | 1.37  | 2.73  |
| GG21          | 9092   | NM_016796    | 4567 | 0.44  | 0.39  | 0.96  | -0.16 | 0.89  | 0.72  | 0.62  | 0.12  | 1.74  | 4.02  | 0.08  | 2.73  |
| PLVAP         | 83483  | NM_013110    | 4568 | 2.00  | 1.54  | 1.17  | -0.38 | 0.13  | 0.07  | 1.29  | 0.76  | 0.68  | 4.72  | -0.18 | 2.73  |
| MYF5          | 4617   | NM_005593    | 4569 | -1.12 | -0.74 | -1.23 | -1.27 | -1.41 | -1.40 | 2.08  | 0.76  | 0.11  | -2.08 | -4.08 | 2.73  |
| WALS52        | 54979  | NM_005878    | 4570 | 1.70  | 0.84  | 1.14  | 0.50  | 0.10  | 0.17  | 0.60  | 0.10  | 0.10  | 3.83  | 0.05  | 2.73  |
| NGT1          | 2792   | NM_021955    | 4571 | 2.16  | 0.93  | 1.41  | -0.33 | -0.24 | 0.04  | 1.10  | 0.70  | 0.93  | 4.65  | 0.61  | 2.73  |
| LOC389158     | 389158 | NM_001085420 | 4572 | 1.12  | -0.06 | -0.07 | -0.67 | -0.79 | -0.81 | 1.42  | 0.82  | 0.48  | 0.99  | -2.28 | 2.73  |
| LRIC2         | 79442  | NM_024750    | 4573 | 1.47  | 1.62  | 1.13  | 0.40  | 0.28  | -0.04 | 0.97  | 0.77  | 0.98  | 4.22  | 0.27  | 2.73  |
| 112GAT14      | 11320  | NM_021214    | 4574 | 1.15  | 1.80  | 0.52  | 0.17  | 0.43  | 1.72  | 0.43  | 0.14  | 0.77  | 3.47  | 0.22  | 2.73  |
| ERN1          | 2081   | NM_001433    | 4575 | 1.14  | 1.68  | 0.77  | -0.48 | 0.03  | -0.28 | 0.74  | 1.18  | 0.81  | 3.60  | -0.73 | 2.72  |
| DKFZP434B18   | 25896  | NM_015434    | 4576 | 2.41  | 0.13  | 0.27  | 0.12  | -0.71 | -0.54 | 1.19  | 0.81  | 0.72  | 2.81  | -1.14 | 2.72  |
| H3            | 3161   | NM_020115    | 4577 | 1.39  | 1.31  | 1.48  | -0.11 | 1.13  | 0.54  | 0.69  | 0.12  | 0.12  | 3.18  | 0.78  | 2.72  |
| UBL5          | 59286  | NM_024292    | 4578 | -1.47 | -0.69 | -1.25 | -2.85 | -2.55 | -2.44 | 0.08  | 1.83  | 0.82  | -3.41 | -7.84 | 2.72  |
| ARMC2         | 84071  | NM_023121    | 4579 | 1.03  | 1.30  | 1.64  | 0.48  | 0.37  | 1.70  | 0.27  | 2.23  | 0.22  | 5.78  | 2.55  | 2.72  |
| FLU3701101099 | 222483 | NM_00101099  | 4580 | -0.33 | -0.53 | -0.23 | -1.33 | -1.04 | -1.02 | 0.23  | 0.31  | 0.11  | -1.42 | -3.60 | 2.72  |
| CCORF15       | 79441  | NM_024511    | 4581 | 1.17  | 0.03  | 0.66  | -0.36 | -0.90 | -0.71 | 0.76  | 0.82  | 1.14  | 0.45  | 1.87  | 2.72  |
| UP8           | 116840 | NM_053051    | 4582 | 0.01  | -0.35 | 0.92  | -1.00 | -0.67 | -0.09 | 1.09  | 0.26  | 1.37  | 0.58  | -0.86 | 2.72  |
| MC1265        | 78991  | NM_024083    | 4583 | 0.67  | 0.10  | 0.83  | -1.51 | -0.21 | -1.09 | 1.44  | 0.06  | 1.22  | 1.60  | -1.78 | 2.72  |
| CCSL          | 617    | NM_004328    | 4584 | 1.47  | 0.96  | 0.49  | -0.17 | 0.65  | 0.47  | 0.10  | 0.10  | 0.10  | 2.92  | 1.80  | 2.72  |
| ACE2          | 59272  | NM_021804    | 4585 | -0.80 | -0.69 | -0.68 | -2.20 | -2.24 | -1.66 | 0.74  | 1.15  | 0.82  | -2.17 | -6.10 | 2.71  |
| BMF10         | 27302  | NM_014842    | 4586 | -0.60 | 1.01  | 0.01  | -0.40 | -0.50 | -0.81 | 0.42  | 1.58  | 1.54  | 0.41  | -1.71 | 2.71  |
| TRFD          | 34763  | NM_005095    | 4587 | 0.06  | 0.74  | 1.63  | -1.08 | -1.67 | -1.08 | 0.65  | 0.17  | 0.17  | -1.43 | -3.49 | 2.71  |
| TRBP          | 7205   | NM_003302    | 4588 | -0.62 | -0.55 | -1.01 | -1.93 | -0.26 | -1.71 | 1.65  | 0.25  | 0.80  | -2.18 | -3.90 | 2.71  |
| FGF18         | 8817   | NM_033649    | 4589 | 0.40  | -0.30 | 0.18  | -0.77 | -0.36 | -0.24 | 1.42  | 0.87  | 0.42  | 0.28  | -1.37 | 2.71  |
| FLJ21808      | 78657  | NM_016064    | 4590 | 0.60  | 0.80  | 0.20  | -1.06 | -0.80 | -1.32 | 0.69  | 1.18  | 0.26  | 1.10  | -1.09 | 2.71  |
| SAGE1         | 55511  | NM_018666    | 4591 | 0.31  | 0.71  | 0.31  | -0.98 | -1.41 | -1.74 | 1.32  | 0.30  | 1.08  | 0.72  | -4.13 | 2.71  |
| BTBD12        | 84464  | NM_032444    | 4592 | -0.42 | -0.19 | 0.10  | -0.69 | -1.05 | -1.17 | 0.32  | 0.76  | 1.63  | -0.52 | -2.92 | 2.71  |
| WBCSD2C       | 260294 | NM_00198487  | 4593 | 1.11  | 1.30  | 1.65  | 0.19  | -0.21 | -0.52 | 0.37  | 1.37  | 0.96  | 4.05  | -0.53 | 2.70  |
| MTF41         | 2312   | NM_024143    | 4594 | 2.73  | 1.02  | 1.71  | 0.62  | 0.49  | 0.71  | 0.62  | 0.49  | 0.71  | 5.48  | 1.91  | 2.70  |
| LOC120224     | 120224 | NM_138788    | 4595 | 1.39  | 1.85  | 1.00  | -0.38 | 0.21  | 0.12  | 2.12  | 0.44  | 0.14  | 4.24  | -0.04 | 2.70  |
| DUSP12        | 11266  | NM_007240    | 4596 | 0.59  | 2.03  | 3.76  | 1.62  | 2.06  | 2.39  | 0.51  | 0.17  | 2.02  | 6.38  | 6.07  | 2.70  |
| TR7           | 8772   | NM_003824    | 4597 | 0.83  | 0.43  | 0.67  | -0.88 | -0.38 | -0.13 | 1.57  | 0.87  | 0.58  | 0.67  | 2.76  | 2.70  |
| GLCC1         | 112363 | NM_138426    | 4598 | -0.66 | 0.01  | -0.19 | -1.17 | -1.40 | -1.29 | 0.11  | 1.87  | 0.72  | -0.84 | -3.86 | 2.70  |
| SOR8          | 30812  | NM_014587    | 4599 | 1.63  | 1.29  | 0.99  | 0.01  | -0.59 | -0.84 | 0.92  | 0.29  | 1.49  | 3.91  | -1.42 | 2.70  |
| RABF5         | 158158 | NM_021573    | 4600 | 0.70  | 2.00  | 0.88  | 0.03  | 1.08  | 0.33  | 0.60  | 0.10  | 0.10  | 3.58  | 1.03  | 2.70  |
| VAX1          | 11023  | NM_001127004 | 4601 | -0.99 | 0.33  | 0.13  | -1.56 | -1.02 | -0.84 | 0.12  | 0.76  | 2.05  | -0.52 | -1.42 | 2.70  |
| LMDO1         | 25802  | NM_021134    | 4602 | -0.84 | -1.84 | 1.17  | -2.06 | -3.08 | -0.89 | 0.25  | -0.89 | 3.34  | -1.51 | -6.03 | 2.70  |
| SCL145        | 57468  | NM_020708    | 4603 | 1.67  | 1.12  | 1.16  | -0.05 | -0.25 | -0.13 | 1.14  | 0.92  | 0.61  | 3.95  | -0.75 | 2.70  |
| CNR8          | 630    | NM_074034    | 4604 | 1.09  | 1.09  | 0.86  | 0.14  | 0.14  | 0.24  | 1.14  | 0.24  | 1.14  | 1.86  | 0.87  | 2.70  |
| NDOF2A        | 4695   | NM_002488    | 4605 | 1.40  | 2.26  | 0.88  | 0.43  | 1.54  | 0.32  | 0.32  | 2.14  | 0.24  | 4.54  | 2.29  | 2.69  |
| GNIN1         | 2902   | NM_000832    | 4606 | 0.93  | 1.25  | 0.89  | 0.14  | 0.27  | 0.64  | 1.47  | 1.14  | 0.09  | 3.07  | 1.05  | 2.69  |
| RHCT          | 7944   | NM_023161    | 4607 | 0.43  | 0.43  | 0.43  | -1.07 | -0.86 | -0.69 | 0.57  | 0.69  | 0.58  | -1.46 | -5.54 | 2.69  |
| HCCA2         | 81532  | NM_005303    | 4608 | 1.45  | 0.03  | -0.27 | -0.73 | -0.91 | -1.17 | 1.48  | 0.70  | 0.51  | 1.21  | -2.81 | 2.69  |
| SFRS10        | 6434   | NM_004995    |      |       |       |       |       |       |       |       |       |       |       |       |       |

|             |          |              |      |       |       |       |       |       |       |       |       |       |       |       |       |      |
|-------------|----------|--------------|------|-------|-------|-------|-------|-------|-------|-------|-------|-------|-------|-------|-------|------|
| CD274       | 29126    | NM_014143    | 4691 | 1.00  | 1.42  | 0.82  | -0.79 | -0.18 | 0.14  | 0.97  | 1.24  | 0.42  | 3.25  | -0.83 | 2.63  |      |
| LOC51326    | 51326    | NM_020623    | 4692 | -0.61 | -0.63 | 1.03  | -0.91 | -0.63 | 1.37  | 0.93  | 1.27  | 0.42  | 0.36  | -0.83 | 2.63  |      |
| OBNG1       | 128372   | NM_00105585  | 4693 | 0.94  | 0.44  | 0.37  | -0.14 | -1.15 | -0.46 | 0.82  | 1.42  | 0.39  | 1.75  | -1.75 | 2.62  |      |
| STAG2       | 10735    | NM_006603    | 4694 | 0.79  | 1.32  | 1.53  | -0.49 | -0.32 | -0.39 | 0.58  | 0.84  | 1.20  | 3.64  | -1.20 | 2.62  |      |
| FBKD10      | 26202    | NM_291314    | 4695 | 0.90  | 1.16  | 1.97  | -0.17 | -0.14 | 0.07  | 0.32  | 1.07  | 1.23  | 3.43  | -0.24 | 2.62  |      |
| HCF4H4      | 321034   | NM_076204    | 4696 | 0.96  | 1.47  | 1.80  | 0.57  | -0.06 | 0.17  | 1.15  | 0.79  | 0.86  | 4.78  | 0.22  | 2.62  |      |
| MARK4       | 57787    | NM_031417    | 4697 | -0.02 | -0.35 | 2.69  | -0.60 | -1.96 | -0.59 | 0.15  | 0.41  | 2.06  | 2.33  | -1.15 | 2.62  |      |
| DNAJ3       | 9093     | NM_005147    | 4698 | 0.25  | -0.21 | -0.37 | -1.05 | -1.48 | -0.20 | 1.28  | 1.41  | -0.06 | -0.33 | -2.79 | 2.61  |      |
| SLC7A7      | 5703     | NM_009209    | 4699 | 0.28  | 1.60  | 1.42  | 0.51  | 1.80  | 0.42  | 0.51  | 1.80  | 0.42  | 6.16  | 1.62  | 2.61  |      |
| PTXSL       | 11344    | NM_007284    | 4700 | -0.43 | -1.68 | -0.16 | -2.24 | -2.95 | -0.99 | 0.30  | -0.86 | 0.17  | -2.28 | -6.18 | 2.61  |      |
| SPR46       | 10929    | NM_032102    | 4701 | 2.03  | 0.58  | 1.82  | 0.21  | 1.65  | 0.74  | 1.81  | -0.23 | 1.03  | 4.43  | 2.60  | 2.61  |      |
| H3D3B       | 8386     | NM_001031    | 4702 | -0.07 | -0.67 | -0.19 | -0.67 | -0.19 | 0.13  | 0.67  | -0.19 | 0.13  | 0.67  | -0.32 | -2.19 | 2.61 |
| TACL1       | 6863     | NM_013998    | 4703 | 2.64  | 1.68  | 1.90  | 0.35  | 1.10  | 0.43  | 1.14  | 0.77  | 0.71  | 6.25  | 0.88  | 2.61  |      |
| FLJ20345    | 54903    | NM_017777    | 4704 | 1.76  | 2.10  | 1.88  | -0.68 | 1.48  | 0.12  | 1.59  | -0.01 | 1.03  | 5.74  | 0.92  | 2.61  |      |
| PRK         | 57716    | NM_181882    | 4705 | 0.37  | 1.00  | 1.74  | -0.96 | -0.70 | -0.38 | 0.22  | 1.71  | 0.67  | 3.11  | -2.04 | 2.61  |      |
| ZNF189      | 7761     | NM_003452    | 4706 | 0.28  | 0.26  | 0.16  | -1.00 | -1.02 | 0.04  | 1.67  | 1.09  | 0.15  | 0.70  | 1.98  | 2.61  |      |
| LOC340542   | 340542   | NM_001012978 | 4707 | 0.56  | 0.69  | 0.61  | -0.37 | 0.03  | -0.24 | 1.41  | 0.49  | 0.71  | 1.86  | -0.58 | 2.61  |      |
| TNME22      | 219623   | NM_178950    | 4708 | 0.20  | 0.02  | 1.22  | 0.36  | -0.64 | -0.20 | 0.01  | 0.79  | 1.81  | 1.45  | -0.48 | 2.61  |      |
| LRBS        | 10590    | NM_000840    | 4709 | 2.42  | 1.08  | 1.27  | 0.69  | 0.99  | 0.29  | 1.26  | -0.07 | 1.23  | 4.78  | 1.97  | 2.61  |      |
| C10TNF6     | 114904   | NM_182486    | 4710 | -0.57 | 0.21  | -0.86 | -1.16 | -1.73 | -0.84 | 0.30  | 2.03  | 0.28  | -1.22 | -3.73 | 2.61  |      |
| RGSM7D2     | 93587    | NM_152292    | 4711 | 2.06  | 1.49  | 1.35  | -0.20 | 0.23  | 0.20  | 1.37  | 0.73  | 0.50  | 4.90  | 0.24  | 2.61  |      |
| HIOC        | 4653     | NM_002061    | 4712 | 2.16  | 0.72  | 1.84  | -0.05 | 0.40  | 0.84  | 1.74  | 0.36  | 0.50  | 4.72  | 1.20  | 2.60  |      |
| PCLP1       | 27043    | NM_014389    | 4713 | 0.72  | -0.10 | 1.69  | 0.46  | -0.11 | -0.11 | 0.39  | -0.04 | 2.25  | 2.31  | 0.24  | 2.60  |      |
| LYPD2       | 137797   | NM_205545    | 4714 | 1.36  | 1.62  | 1.70  | 0.08  | 0.46  | 0.00  | 0.73  | 0.98  | 0.89  | 4.68  | 0.54  | 2.60  |      |
| SPF2        | 8433     | NM_003571    | 4715 | 2.12  | 2.43  | 0.92  | 1.64  | 1.04  | 0.83  | 1.42  | 0.69  | 0.49  | 5.36  | 3.51  | 2.60  |      |
| XR18        | 9942     | NM_005108    | 4716 | 1.53  | 1.99  | 1.89  | 0.47  | 0.96  | 0.14  | 0.94  | 0.61  | 1.05  | 5.41  | 1.57  | 2.60  |      |
| RTN3        | 10313    | NM_201430    | 4717 | 0.66  | 2.43  | 0.85  | 0.00  | -0.28 | -0.04 | 0.45  | 1.72  | 0.43  | 3.94  | -0.33 | 2.60  |      |
| PRAMF6      | 440561   | NM_001010889 | 4718 | 0.25  | 0.16  | 2.17  | 0.55  | 0.29  | -1.00 | -0.02 | -0.03 | 2.65  | 2.58  | -0.22 | 2.60  |      |
| 2982        | 2982     | NM_003866    | 4719 | 0.39  | 0.23  | 0.34  | -1.13 | 0.34  | 0.13  | 0.34  | 0.13  | 0.34  | 0.76  | 0.59  | 2.60  |      |
| FLJ5382     | 163859   | NM_152608    | 4720 | 0.68  | 0.85  | 0.78  | -0.35 | -0.36 | -0.16 | 0.64  | 0.91  | 1.05  | 2.31  | -0.87 | 2.60  |      |
| COL2A1      | 1280     | NM_033150    | 4721 | 1.60  | 1.31  | 1.16  | -0.21 | -0.25 | -0.69 | 0.76  | 0.53  | 1.30  | 4.07  | -1.15 | 2.59  |      |
| FLJ21824    | 7983     | NM_012774    | 4722 | 1.72  | 1.26  | 1.44  | -0.12 | 1.52  | 0.24  | 1.52  | 0.24  | 1.42  | 4.21  | 0.68  | 2.59  |      |
| LOC51315    | 51315    | NM_016618    | 4723 | 0.22  | 0.81  | 1.07  | -0.21 | -0.24 | -0.66 | 0.64  | 0.32  | 1.63  | 2.10  | -1.11 | 2.59  |      |
| FLJ4512     | 124093   | NM_001031737 | 4724 | 0.61  | 0.47  | 0.83  | -0.17 | -0.30 | -0.22 | 1.28  | 0.26  | 1.05  | 1.90  | -0.70 | 2.59  |      |
| USH1G       | 124598   | NM_173477    | 4725 | 0.00  | 0.37  | 0.54  | -0.81 | -0.43 | -0.06 | 1.08  | 1.02  | 0.49  | 1.70  | -1.29 | 2.59  |      |
| ACL         | 178      | NM_000044    | 4726 | 1.53  | 1.82  | 1.42  | 0.54  | 0.83  | 0.24  | 1.54  | 0.83  | 0.24  | 5.65  | 0.25  | 2.59  |      |
| SDSL        | 113675   | NM_138432    | 4727 | 1.88  | 0.49  | 0.44  | 0.73  | 0.13  | 0.87  | 1.48  | 0.66  | 0.44  | 2.81  | 1.73  | 2.58  |      |
| FBQ36       | 130888   | NM_174899    | 4728 | 1.45  | 0.66  | 1.13  | -0.60 | -0.53 | -0.41 | 1.23  | 0.43  | 0.93  | 3.24  | -1.55 | 2.58  |      |
| FBQ36       | 38867    | NM_203458    | 4729 | 0.97  | 0.97  | 1.36  | 0.13  | 0.27  | 0.50  | 1.19  | 1.37  | 0.48  | 3.84  | 0.54  | 2.58  |      |
| CYR61       | 3491     | NM_001554    | 4730 | 1.58  | 0.30  | 0.66  | -0.27 | 0.27  | -0.48 | 2.49  | -0.38 | 0.47  | 3.54  | -0.48 | 2.58  |      |
| FLJ21986    | 79974    | NM_001105533 | 4731 | -0.02 | 0.47  | 0.14  | -0.50 | -0.69 | -0.28 | 0.33  | 1.63  | 0.62  | 0.59  | -1.47 | 2.58  |      |
| DCAP7       | 84879    | NM_001032887 | 4732 | 0.09  | 0.25  | 1.25  | 0.11  | 1.38  | 0.12  | 0.11  | 1.38  | 0.12  | 1.18  | -4.28 | 2.58  |      |
| VMP         | 140769   | NM_080723    | 4733 | 0.83  | -0.60 | -0.39 | -1.08 | -1.01 | -1.24 | 0.23  | 1.09  | 1.26  | 1.82  | -3.22 | 2.58  |      |
| IL10        | 3586     | NM_000572    | 4734 | 2.69  | 1.48  | 2.38  | 0.88  | 1.26  | 1.09  | 1.26  | 1.18  | 1.14  | 6.56  | 3.23  | 2.58  |      |
| RIAD513     | 9764     | NM_014732    | 4735 | -0.67 | 1.02  | 1.19  | -0.24 | -0.74 | -0.45 | -0.30 | 2.01  | 0.87  | 0.54  | -1.43 | 2.58  |      |
| WAL1304     | 5764     | NM_002084    | 4736 | 0.74  | 1.49  | 1.55  | 0.45  | 0.85  | -0.49 | 1.15  | 0.85  | -0.49 | 3.76  | 0.25  | 2.58  |      |
| UMQ467      | 388533   | NM_207392    | 4737 | 0.57  | 1.36  | 1.09  | -0.41 | 0.19  | -0.35 | 0.53  | 0.66  | 1.38  | 3.02  | 0.25  | 2.58  |      |
| TCN1        | 6947     | NM_001062    | 4738 | 1.42  | -0.12 | 0.10  | -0.83 | -0.06 | -0.80 | 1.49  | 0.00  | 1.09  | 1.40  | -1.70 | 2.58  |      |
| SSCA        | 6385     | NM_020999    | 4739 | 0.27  | 0.42  | 0.44  | 0.15  | 0.27  | 0.12  | 0.15  | 0.27  | 0.12  | 1.14  | 0.68  | 2.58  |      |
| BCN1        | 8678     | NM_003766    | 4740 | 1.30  | 0.17  | 0.08  | -1.48 | -1.44 | -0.56 | 0.00  | 2.07  | 0.50  | 1.55  | -3.47 | 2.57  |      |
| PTMA        | 5757     | NM_002823    | 4741 | 1.27  | 1.15  | 0.56  | 0.83  | -0.18 | 0.63  | 0.71  | 1.37  | 0.50  | 2.97  | 1.28  | 2.57  |      |
| NDC1        | 7481     | NM_001032887 | 4742 | -0.79 | 0.40  | 0.40  | -0.79 | 0.40  | 0.40  | 0.40  | 0.40  | 0.40  | 0.40  | -0.79 | 2.57  |      |
| FMOD        | 2331     | NM_002023    | 4743 | 0.09  | -1.17 | -0.94 | -2.03 | -1.69 | -2.23 | 1.94  | -0.42 | 1.05  | -2.02 | -5.96 | 2.57  |      |
| ILV1        | 10994    | NM_176826    | 4744 | 0.35  | -0.07 | 1.41  | 0.16  | -0.15 | 0.08  | 0.71  | 1.19  | 0.67  | 1.68  | 0.09  | 2.57  |      |
| NFN3        | 7579     | NM_145238    | 4745 | 1.00  | -0.11 | 0.94  | -0.51 | -0.98 | -1.19 | 1.48  | 0.37  | 0.72  | 1.83  | -1.68 | 2.57  |      |
| SCOR        | 2942     | NM_000140    | 4746 | 0.61  | 0.61  | 1.30  | -1.46 | -1.37 | -0.46 | 1.62  | 1.51  | 0.76  | 1.67  | 0.63  | 2.57  |      |
| HPF2        | 27068    | NM_176867    | 4747 | -1.10 | -1.81 | -1.17 | -2.71 | -2.50 | -1.69 | 2.48  | 1.12  | 0.20  | -4.07 | -8.90 | 2.57  |      |
| PPA2        | 51447    | NM_001059511 | 4748 | 1.92  | 1.23  | 2.60  | 0.30  | 1.41  | 1.32  | 1.50  | 0.59  | 0.47  | 5.75  | 3.02  | 2.57  |      |
| HARPIN      | 8165     | NM_030974    | 4749 | 0.74  | 1.64  | 1.62  | 0.76  | 0.64  | 0.16  | 1.44  | 0.76  | 0.16  | 3.40  | 1.62  | 2.57  |      |
| PRDM9       | 56979    | NM_020227    | 4750 | 1.93  | 1.18  | 0.92  | -1.19 | -1.28 | -0.51 | 1.51  | 0.48  | 0.58  | 4.04  | -0.97 | 2.56  |      |
| RYR3        | 6263     | NM_001036    | 4751 | -0.61 | -0.29 | -0.49 | -1.53 | -1.28 | -1.53 | 0.73  | 0.83  | 1.00  | -1.39 | -4.33 | 2.56  |      |
| HSO7        | 85937    | NM_001036    | 4752 | 1.13  | 0.20  | 0.39  | -0.47 | -0.56 | -0.22 | 1.37  | 0.47  | 0.72  | 1.67  | -1.43 | 2.56  |      |
| COL11A1     | 1301     | NM_080630    | 4753 | 1.61  | 0.78  | 2.01  | 0.51  | -0.44 | -0.21 | 0.73  | 0.12  | 1.71  | 4.40  | -0.15 | 2.56  |      |
| SNX14       | 57231    | NM_020468    | 4754 | -0.04 | -0.34 | -0.54 | -1.08 | -0.35 | -1.18 | 0.95  | 0.71  | 0.90  | -0.92 | -2.61 | 2.56  |      |
| MGC45474    | 126969   | NM_152389    | 4755 | 0.18  | 0.31  | -0.56 | -1.16 | -1.74 | -0.99 | 0.28  | 1.83  | 0.45  | -0.94 | -3.85 | 2.56  |      |
| SPF         | 2997     | NM_014776    | 4756 | 0.72  | 0.80  | 0.60  | 0.89  | 0.50  | 0.27  | 0.89  | 0.50  | 0.27  | 3.84  | 1.07  | 2.56  |      |
| MGC1577     | 84864    | NM_198867    | 4757 | -0.15 | -0.04 | 0.06  | -0.92 | -0.93 | -1.36 | 0.69  | -0.21 | 2.07  | -0.20 | -3.20 | 2.56  |      |
| ESM1        | 11082    | NM_007036    | 4758 | -0.26 | -0.73 | -0.46 | -1.49 | -1.68 | -0.99 | 0.96  | 1.05  | 0.55  | -1.45 | -4.12 | 2.56  |      |
| CTGL5       | 41438    | NM_00107865  | 4759 | 0.92  | 0.17  | 0.65  | 0.46  | 0.12  | 0.12  | 0.46  | 0.12  | 0.12  | 2.99  | -1.52 | 2.56  |      |
| FMO3        | 2328     | NM_006894    | 4760 | 0.76  | 0.50  | 0.71  | -0.64 | 0.00  | -0.50 | 0.96  | 0.38  | 1.22  | 1.96  | -1.13 | 2.55  |      |
| KRTAP25-1   | 16408    | NM_00112898  | 4761 | 1.02  | 1.39  | 1.26  | -0.77 | 2.24  | -0.27 | 0.99  | 0.17  | 1.40  | 3.67  | 1.20  | 2.55  |      |
| NFE1L3      | 10439    | NM_001032887 | 4762 | 0.18  | -0.06 | 0.04  | -0.18 | -0.06 | 0.04  | 0.18  | -0.06 | 0.04  | 0.18  | -0.06 | 2.55  |      |
| LOC10013425 | 10013425 | NM_001135241 | 4763 | 2.99  | 0.47  | 0.52  | -0.18 | 0.62  | 0.06  | 2.01  | -0.08 | 0.62  | 3.99  | 0.35  | 2.55  |      |
| STN8        | 9482     | NM_004853    | 4764 | 1.13  | 0.29  | 0.67  | -0.72 | -0.21 | 0.23  | 1.89  | 0.08  | 0.58  | 2.10  | 0.70  | 2.55  |      |
| MIR1        | 11253    | NM_016219    | 4765 | 0.32  | 0.53  | 0.79  | -0.03 | -0.24 | 0.37  | -0.12 | 1.81  | 0.86  | 1.64  | -0.11 | 2.55  |      |
| CATSFR4     | 37880    | NM_198137    | 4766 | 0.00  | 1.12  | 0.07  | 0.00  | 1.12  | 0.07  | 0.00  | 1.12  | 0.07  | 1.06  | 1.75  | 2.55  |      |
| GRN         | 2896     | NM_001012479 | 4767 | -0.49 | 0.16  | 0.09  | -0.88 | 0.00  | -0.91 | 0.44  | 0.81  | 1.29  | -0.25 | -1.79 | 2.55  |      |
| XPKM2H      | 57109    | NM_020385    | 4768 | 1.51  | 0.79  | 0.66  | -0.37 | -0.03 | -0.75 | 1.28  | 0.13  | 1.14  | 2.96  | -1.16 | 2.55  |      |
| HE1         | 55154    | NM_145175    | 4769 | 0.89  | 0.21  | 0.65  | 0.89  | 0.21  | 0.65  | 0.89  | 0.21  | 0.65  | 1.17  | 1.45  | 2.55  |      |
| RAB10       | 10890    | NM_016131    | 4770 | 1.39  | 0.89  | 0.65  | -0.15 | -0.39 | -0.90 | 0.85  | 0.64  | 1.06  | 2.93  | -1.44 | 2.54  |      |
| JAS2        | 29956    | NM_0         |      |       |       |       |       |       |       |       |       |       |       |       |       |      |

|           |        |              |      |       |       |       |       |       |       |       |       |       |       |       |      |
|-----------|--------|--------------|------|-------|-------|-------|-------|-------|-------|-------|-------|-------|-------|-------|------|
| MNR-1     | 25953  | NM_022572    | 4853 | 1.15  | 2.00  | 1.50  | 0.20  | 0.74  | 0.31  | -0.21 | 0.27  | 2.41  | 4.65  | 1.25  | 2.47 |
| SRP2      | 8496   | NM_000307    | 4854 | -0.31 | -0.41 | -0.85 | -1.40 | -1.58 | -1.19 | 1.31  | 1.19  | 0.46  | -0.95 | -1.58 | 2.47 |
| SRPX      | 8496   | NM_000307    | 4855 | 0.37  | 0.03  | 0.37  | -1.13 | -1.21 | -0.49 | 0.60  | 0.83  | 1.05  | 0.02  | 2.83  | 2.47 |
| ZDHC13    | 54503  | NM_001001483 | 4856 | -0.67 | -0.48 | 0.43  | -1.12 | 1.03  | -0.70 | -0.09 | 0.42  | 2.14  | -0.72 | -0.79 | 2.47 |
| PTH       | 5741   | NM_000315    | 4857 | 2.65  | 0.77  | 1.43  | 0.26  | -0.28 | -0.40 | 0.95  | 0.30  | 1.22  | 4.55  | -0.42 | 2.47 |
| PARC1     | 2658   | NM_000368    | 4858 | 1.30  | 0.27  | 0.42  | 0.86  | 0.56  | 0.44  | 0.86  | 0.36  | 0.52  | 7.49  | 1.34  | 2.47 |
| TRIM72    | 498289 | NM_001008274 | 4859 | 2.89  | 7.10  | 5.31  | 2.37  | 1.18  | 1.44  | 0.35  | 1.02  | 1.11  | 16.10 | 4.99  | 2.47 |
| MGC39724  | 149685 | NM_001018082 | 4860 | 0.36  | 0.69  | 0.26  | -0.50 | -0.50 | -0.25 | 1.07  | 0.81  | 0.58  | 1.31  | -1.25 | 2.47 |
| ST7       | 7987   | NM_000312    | 4861 | 0.81  | 0.12  | 0.12  | 0.81  | 1.13  | 1.12  | 1.03  | 1.57  | 1.28  | 0.72  | 4.05  | 2.47 |
| NMAAF     | 8439   | NM_000380    | 4862 | 2.56  | 1.02  | -0.03 | 0.80  | 0.06  | -0.34 | 1.35  | 0.65  | 0.46  | 3.55  | 0.52  | 2.47 |
| STK179    | 9362   | NM_000426    | 4863 | 0.51  | 1.88  | 0.56  | -0.16 | 0.12  | -0.27 | 0.30  | 1.36  | 0.81  | 2.95  | -0.31 | 2.47 |
| FL10169   | 55739  | NM_0010210   | 4864 | 0.23  | 0.13  | 0.37  | 0.50  | -0.02 | 0.00  | 1.33  | 1.43  | 0.26  | 2.10  | -0.68 | 2.47 |
| SPAGA     | 6676   | NM_0003116   | 4865 | 1.35  | 0.88  | 0.24  | -0.60 | -0.46 | -0.66 | 0.93  | 0.86  | 0.67  | 2.47  | -1.71 | 2.47 |
| DOR1      | 780    | NM_0013994   | 4866 | 1.27  | 0.83  | 1.64  | 0.92  | 0.08  | 0.16  | 0.52  | 0.82  | 1.14  | 3.74  | 1.16  | 2.47 |
| KRT19     | 3880   | NM_000276    | 4867 | 0.76  | 1.42  | 0.74  | -0.61 | -0.09 | -0.14 | 0.86  | 0.69  | 0.92  | 2.92  | -0.84 | 2.47 |
| FL13745   | 16595  | NM_1440978   | 4868 | 1.26  | 1.56  | 0.10  | -0.14 | 0.23  | 0.36  | 0.94  | 1.01  | 0.51  | 2.92  | -0.26 | 2.47 |
| STX18     | 53407  | NM_016930    | 4869 | 0.51  | 1.21  | 1.27  | 1.15  | 0.29  | 0.25  | -0.05 | 0.65  | 1.87  | 2.99  | 1.70  | 2.46 |
| BVM       | 5484   | NM_017093    | 4870 | 2.41  | 1.57  | 2.02  | -0.04 | 0.31  | 0.20  | 0.84  | 0.52  | 1.10  | 6.00  | 0.47  | 2.46 |
| PG1       | 5552   | NM_0002737   | 4871 | 1.72  | 1.21  | 0.89  | 0.78  | 1.66  | 0.66  | 1.87  | 0.46  | 0.14  | 3.82  | 3.09  | 2.46 |
| KUAA1160  | 57461  | NM_0020701   | 4872 | -1.11 | -1.24 | -1.57 | -2.42 | -2.86 | -1.91 | 0.48  | 1.96  | 0.03  | -3.93 | -7.20 | 2.46 |
| TF3       | 7033   | NM_0003226   | 4873 | -0.21 | -1.60 | 1.12  | -1.49 | -2.02 | -1.04 | 1.35  | 0.51  | 1.62  | -0.69 | -4.54 | 2.46 |
| AVPR18    | 553    | NM_0000707   | 4874 | -1.08 | -0.42 | -0.05 | -0.10 | -0.85 | -0.44 | -0.57 | 2.45  | 0.58  | -1.55 | -1.40 | 2.46 |
| LJFFL2    | 10184  | NM_0005779   | 4875 | 1.07  | 0.72  | -0.58 | -0.37 | -0.39 | -0.74 | 1.41  | 0.97  | 0.08  | 3.21  | -1.50 | 2.46 |
| VCC2      | 51480  | NM_016378    | 4876 | 3.05  | 1.23  | 0.42  | 0.41  | 0.14  | 0.27  | 1.76  | 0.47  | 0.23  | 4.70  | 0.81  | 2.46 |
| AGPAT2    | 10553  | NM_001012727 | 4877 | -0.57 | -0.10 | -0.75 | -1.35 | -1.04 | -1.29 | 0.53  | 1.23  | 0.70  | -1.42 | -1.64 | 2.46 |
| MID       | 4287   | NM_000660    | 4878 | -0.81 | 0.82  | 0.96  | -0.73 | -1.16 | -0.07 | 0.55  | 1.68  | 1.33  | 0.97  | -0.56 | 2.46 |
| TEX13A    | 56157  | NM_0013274   | 4879 | -0.73 | 1.37  | -0.89 | -0.99 | -1.18 | -0.75 | -0.08 | 1.63  | 0.91  | 0.25  | -2.92 | 2.46 |
| CTMP      | 11745  | NM_0003055   | 4880 | 1.93  | 0.74  | 2.79  | 0.38  | 0.10  | 0.24  | 0.05  | 0.38  | 2.03  | 4.46  | 0.72  | 2.46 |
| C10W130   | 38757  | NM_001013132 | 4881 | 2.34  | 1.41  | 1.71  | 1.44  | 1.51  | 1.41  | 1.04  | 0.62  | 1.13  | 5.46  | 1.37  | 2.46 |
| CH1P      | 8805   | NM_0003852   | 4882 | 0.40  | 1.46  | 0.85  | 0.32  | -0.51 | -1.19 | 0.63  | 1.05  | 0.78  | 3.71  | -0.38 | 2.46 |
| STAC3     | 246329 | NM_145064    | 4883 | 2.70  | 3.59  | 2.67  | 0.97  | 0.83  | 1.08  | 0.44  | 1.59  | 0.42  | 8.96  | 2.88  | 2.46 |
| FAHW12    | 285231 | NM_207102    | 4884 | 0.87  | 1.18  | 0.85  | 0.88  | -0.81 | -0.79 | 0.81  | 0.88  | 0.71  | 2.90  | -1.37 | 2.46 |
| POOLC2    | 265797 | NM_013363    | 4885 | 2.21  | 1.19  | 0.33  | 0.38  | -0.16 | 0.06  | 1.03  | 1.11  | 0.30  | 3.73  | 0.27  | 2.45 |
| ZNF408    | 79797  | NM_002471    | 4886 | 0.58  | -0.19 | -0.07 | -1.06 | -1.43 | -1.57 | 0.61  | 1.56  | 1.28  | 0.32  | -4.06 | 2.45 |
| TACC1     | 6887   | NM_006283    | 4887 | 1.04  | 1.38  | 0.99  | -0.07 | -0.42 | -0.19 | 0.72  | 1.59  | 0.13  | 2.81  | -0.88 | 2.45 |
| SPR122    | 39012  | NM_206997    | 4888 | 0.25  | 0.02  | 0.39  | -0.27 | 0.86  | 0.94  | 0.02  | 0.67  | 0.66  | 0.46  | 1.75  | 2.45 |
| DERPC     | 54921  | NM_017804    | 4889 | -0.36 | -0.90 | 0.73  | -0.46 | -0.92 | -0.05 | 0.56  | 0.00  | 1.88  | -0.53 | -1.42 | 2.45 |
| CDL3      | 51205  | NM_016508    | 4890 | 1.77  | 0.39  | 1.11  | 0.30  | -0.85 | 0.55  | 0.81  | 1.34  | 0.50  | 3.26  | -0.01 | 2.44 |
| MNP       | 51565  | NM_016586    | 4891 | -0.68 | -0.56 | 0.55  | -1.65 | -1.05 | -0.66 | 1.61  | 0.56  | 0.55  | -1.25 | -2.91 | 2.44 |
| CHGB      | 1114   | NM_001819    | 4892 | -0.01 | -0.29 | -0.75 | -0.65 | -1.02 | -0.59 | 1.80  | 0.52  | 0.12  | -1.05 | -0.26 | 2.44 |
| CC133     | 414062 | NM_001001437 | 4893 | -0.19 | 0.94  | 1.91  | -0.35 | -0.42 | 0.30  | 0.49  | 0.90  | 1.05  | 2.66  | -0.47 | 2.44 |
| SLC101    | 1846   | NM_000364    | 4894 | 1.91  | 1.40  | 1.02  | 0.10  | 0.50  | 0.51  | 1.02  | 0.44  | 0.24  | 0.31  | 0.03  | 2.44 |
| ELN       | 2906   | NM_000501    | 4895 | 0.07  | -0.85 | -0.39 | -1.42 | 0.50  | -0.65 | 1.08  | -0.34 | 1.73  | -1.17 | -1.57 | 2.44 |
| GEORF17   | 253714 | NM_198468    | 4896 | 1.56  | 0.57  | -0.34 | -0.07 | -0.42 | -1.03 | 1.70  | 0.33  | 0.41  | 1.79  | -1.52 | 2.44 |
| MDM2      | 4193   | NM_006479    | 4897 | 0.60  | -0.06 | 0.44  | 0.00  | -0.09 | 0.90  | 1.42  | 0.38  | 0.64  | 0.98  | 0.81  | 2.44 |
| IN        | 51466  | NM_016337    | 4898 | 0.81  | 0.36  | 0.63  | 0.64  | 1.03  | 0.66  | 0.44  | 1.03  | 0.66  | 3.00  | 3.53  | 2.44 |
| LOC201725 | 201725 | NM_001008393 | 4899 | 2.58  | 2.10  | 1.23  | 0.67  | 0.54  | -0.27 | 0.75  | 0.71  | 0.98  | 5.90  | 0.95  | 2.44 |
| HMTL12    | 3276   | NM_198118    | 4900 | 0.00  | 1.24  | 0.52  | 0.42  | 0.08  | -0.10 | -0.07 | 1.58  | 0.92  | 1.76  | 0.40  | 2.43 |
| NSD2026   | 158158 | NM_0007969   | 4901 | 0.28  | 0.18  | 0.24  | 0.23  | 0.18  | 0.24  | 0.23  | 0.18  | 0.24  | 0.23  | 0.18  | 2.43 |
| LOH12R1   | 118426 | NM_058169    | 4902 | 0.03  | 0.76  | -0.06 | -0.41 | -0.14 | -0.38 | 0.59  | 1.30  | 0.54  | 0.73  | -0.93 | 2.43 |
| PAK2      | 5062   | NM_002577    | 4903 | 0.47  | 0.67  | 0.78  | 0.79  | 0.13  | -0.42 | 0.08  | 0.36  | 1.99  | 1.92  | 0.50  | 2.43 |
| CLA       | 878    | NM_000785    | 4904 | 0.49  | 0.17  | 0.07  | -0.72 | -0.47 | -0.62 | 1.37  | 0.47  | 0.64  | 0.84  | -0.42 | 2.43 |
| KUAA1704  | 55425  | NM_018559    | 4905 | 0.23  | 1.47  | 0.38  | 0.24  | -0.87 | -0.78 | -0.50 | 1.61  | 1.33  | 1.62  | -1.41 | 2.43 |
| C4B       | 721    | NM_000592    | 4906 | 2.78  | 0.28  | 0.87  | 0.05  | -0.13 | -0.49 | 1.25  | 0.14  | 1.04  | 3.93  | -0.58 | 2.43 |
| HTSHD     | 8551   | NM_000350    | 4907 | -1.34 | -0.62 | 1.78  | -0.54 | -1.02 | -0.80 | 0.78  | -0.07 | 1.72  | 2.30  | -2.36 | 2.43 |
| NSD2      | 10742  | NM_130028    | 4908 | 0.97  | 1.74  | 0.77  | 0.21  | -0.31 | -0.71 | 0.25  | 0.86  | 1.32  | 2.47  | 0.14  | 2.43 |
| TNFSF1    | 8742   | NM_0003089   | 4909 | -0.15 | 1.52  | -0.77 | -0.10 | -1.38 | -0.50 | 1.48  | 2.47  | -0.22 | 0.99  | -2.99 | 2.43 |
| YFND1     | 219748 | NM_173555    | 4910 | 0.47  | 0.45  | 0.18  | -0.99 | -0.68 | -0.61 | 0.94  | 0.81  | 0.68  | 1.10  | -2.27 | 2.43 |
| FRAB08    | 1096   | NM_000822    | 4911 | 0.33  | 0.02  | 0.22  | 0.54  | -0.32 | -0.54 | 0.12  | 0.36  | 1.89  | 1.89  | -1.23 | 2.43 |
| PPARD     | 5467   | NM_177435    | 4912 | -0.45 | -0.62 | 0.18  | 0.29  | -0.09 | -0.84 | -0.01 | 0.10  | 2.34  | -0.89 | -0.63 | 2.43 |
| PSTP1     | 9051   | NM_003978    | 4913 | -0.08 | 0.55  | -0.55 | -0.18 | -1.09 | -0.57 | -0.02 | 2.28  | 0.16  | -0.08 | -1.84 | 2.43 |
| LOC100177 | 90167  | NM_0003277   | 4914 | 1.48  | 0.77  | 0.68  | 0.49  | 1.17  | 0.76  | 0.89  | 1.17  | 0.76  | 2.82  | -1.71 | 2.43 |
| SUCLA2    | 8893   | NM_003850    | 4915 | 1.11  | 0.94  | 0.89  | 0.21  | -0.60 | -0.53 | 0.60  | 1.12  | 0.71  | 2.84  | -0.92 | 2.42 |
| C14ORF54  | 161142 | NM_173526    | 4916 | 0.79  | 0.96  | -0.07 | -0.01 | -0.03 | -0.16 | 0.46  | 1.44  | 0.53  | 1.68  | -0.20 | 2.42 |
| PRDM14    | 63978  | NM_020450    | 4917 | 2.31  | 2.04  | 0.65  | 1.47  | 1.81  | 0.52  | 1.01  | 0.67  | 0.74  | 5.00  | 3.80  | 2.42 |
| ATP4A5    | 34460  | NM_000340    | 4918 | 1.42  | 1.40  | 1.27  | 1.14  | 1.02  | 0.88  | 1.02  | 0.00  | 0.91  | 10.10 | 6.13  | 2.42 |
| LUZP6     | 767558 | NM_001128619 | 4919 | 0.23  | -0.22 | -0.76 | -1.05 | -0.67 | -0.75 | 1.89  | 0.28  | 0.24  | -1.75 | -2.47 | 2.42 |
| CBOR20    | 80346  | NM_025232    | 4920 | 0.67  | 0.60  | 0.45  | -0.99 | -0.35 | -0.69 | 0.49  | 0.59  | 1.34  | 0.37  | -2.03 | 2.42 |
| KUAD080   | 9703   | NM_016480    | 4921 | 0.43  | 1.39  | 0.75  | 0.14  | 0.19  | 0.04  | 1.19  | 0.50  | 0.14  | 1.57  | 0.92  | 2.42 |
| FHT       | 2272   | NM_002012    | 4922 | 0.41  | 1.83  | 0.89  | 1.58  | 0.15  | 0.48  | -0.17 | 2.22  | 0.37  | 3.13  | 2.21  | 2.42 |
| CBY61     | 1534   | NM_001915    | 4923 | 1.25  | -0.30 | 0.25  | -0.55 | -0.48 | -0.46 | 1.85  | 0.05  | 0.52  | 1.20  | -1.48 | 2.42 |
| ZNF516    | 25975  | NM_000507    | 4924 | 1.08  | 2.00  | 1.27  | 0.60  | 0.57  | 1.17  | 0.60  | 0.57  | 1.17  | 0.60  | 0.57  | 2.42 |
| OMK415    | 81127  | NM_001005486 | 4925 | 1.13  | 0.63  | 0.96  | 0.31  | -0.31 | -0.16 | 0.97  | 0.67  | 0.79  | 2.72  | 0.17  | 2.42 |
| COMMD3    | 23412  | NM_012071    | 4926 | -0.67 | -0.31 | -0.54 | -0.37 | -1.33 | -1.27 | -0.17 | 1.65  | 0.94  | -1.53 | -2.97 | 2.42 |
| HCR1      | 3090   | NM_001524    | 4927 | -0.38 | -0.84 | -1.00 | -1.63 | -1.51 | -1.63 | 1.07  | 0.48  | 0.86  | -2.22 | -4.74 | 2.42 |
| HTL       | 5172   | NM_016326    | 4928 | 0.39  | 0.11  | 0.37  | 0.13  | 0.02  | 0.13  | 0.02  | 0.13  | 0.02  | 0.13  | 0.02  | 2.42 |
| NP188     | 23511  | NM_015354    | 4929 | 1.81  | 0.36  | 0.15  | 0.43  | -0.38 | -0.79 | 1.27  | 1.02  | 0.13  | 2.32  | 0.75  | 2.42 |
| PKACB     | 5567   | NM_207578    | 4930 | 1.61  | 1.78  | 1.34  | 0.77  | 0.27  | 0.35  | 0.62  | 1.00  | 0.79  | 4.72  | 1.40  | 2.42 |
| NTS1      | 2450   | NM_001490    | 4931 | 0.02  | 0.05  | 0.40  | -0.69 | -0.94 | -0.75 | 0.69  | 0.94  | 0.67  | 0.43  | -2.41 | 2.42 |
| CC141     | 9560   | NM_001001435 | 4932 | 1.84  | 1.44  | 0.24  | -0.09 | 0.20  | -0.93 | 1.28  | 0.35  | 0.79  | 3.52  | 0.83  | 2.41 |
| GATA4     | 2626   | NM_002052    | 4933 | 1.57  | 0     |       |       |       |       |       |       |       |       |       |      |

|             |        |              |      |       |       |       |       |       |       |       |       |       |       |       |       |
|-------------|--------|--------------|------|-------|-------|-------|-------|-------|-------|-------|-------|-------|-------|-------|-------|
| GP18A       | 2811   | NM_000173    | 5015 | 1.12  | 1.35  | 2.04  | 0.87  | 0.80  | 0.77  | 0.73  | 0.51  | 1.11  | 4.51  | 2.44  | 2.35  |
| LC285B3     | 38883  | NM_001239    | 5016 | -0.42 | -0.68 | -0.87 | -0.87 | -0.84 | -0.97 | 2.42  | 0.17  | 0.11  | -0.83 | -1.67 | -1.37 |
| FTH1        | 2495   | NM_002032    | 5017 | 0.36  | 1.92  | 1.66  | 0.17  | 0.83  | 0.22  | 0.13  | 1.16  | 1.06  | 0.84  | 1.21  | 2.35  |
| MEP1B       | 4225   | NM_005925    | 5018 | 0.17  | 0.09  | -0.13 | -0.81 | -0.51 | -0.83 | 0.88  | 0.78  | 0.69  | 0.13  | -2.16 | 2.35  |
| LOC28871    | 28371  | NM_208887    | 5019 | 0.57  | 0.19  | 0.00  | -0.98 | -1.07 | -0.90 | 1.01  | 0.70  | 0.64  | 0.77  | -0.95 | 2.35  |
| SPACK1      | 8183   | NM_002960    | 5020 | 2.21  | 1.57  | 1.31  | 0.20  | 0.29  | 0.12  | 1.11  | 0.62  | 1.10  | 4.10  | 0.51  | 2.35  |
| DUC1        | 9940   | NM_007336    | 5021 | 0.50  | 0.94  | 1.63  | 0.21  | 0.36  | 0.06  | 0.12  | 1.05  | 1.17  | 3.06  | 0.63  | 2.35  |
| EPD1        | 114799 | NM_052911    | 5022 | 0.47  | 0.68  | 1.06  | -0.37 | -0.13 | -0.28 | 1.05  | 0.47  | 0.82  | 2.20  | -0.79 | 2.35  |
| TYMT        | 717    | NM_003067    | 5023 | 0.29  | 0.18  | 0.22  | 0.21  | 0.29  | 0.14  | 0.12  | 0.29  | 0.14  | 0.92  | 1.64  | 2.35  |
| ANAPC7      | 51434  | NM_016238    | 5024 | 2.24  | 1.93  | 1.49  | 0.32  | 0.35  | 1.09  | 1.59  | 0.61  | 0.14  | 5.66  | 1.76  | 2.35  |
| SEMA4D      | 10507  | NM_006178    | 5025 | 1.54  | 0.48  | 1.28  | -0.25 | -0.34 | -0.04 | 0.93  | 0.53  | 0.89  | 3.00  | -0.62 | 2.35  |
| SPNS        | 589    | NM_00325603  | 5026 | 0.55  | 1.66  | 1.66  | 0.50  | 0.41  | 0.37  | 1.52  | 1.79  | 0.60  | 3.02  | 2.68  | 2.35  |
| CLDN15      | 24146  | NM_014343    | 5027 | 0.25  | 0.17  | 0.51  | -0.79 | -0.36 | -0.54 | 0.69  | 0.81  | 0.84  | 1.82  | -1.69 | 2.34  |
| SLC25A22    | 79751  | NM_024698    | 5028 | -0.16 | -0.91 | -1.05 | -1.68 | -1.30 | -1.70 | 2.47  | -0.29 | 0.16  | -2.12 | -4.68 | 2.34  |
| GNS         | 2799   | NM_002076    | 5029 | 1.08  | 2.01  | 1.78  | -0.56 | 0.50  | 0.55  | 0.67  | 0.86  | 0.81  | 4.86  | 0.50  | 2.34  |
| PF27A       | 5150   | NM_002003    | 5030 | 0.71  | 1.22  | 0.86  | -0.01 | -0.79 | 0.12  | 0.20  | 1.60  | 0.54  | 2.80  | 0.68  | 2.34  |
| PROCR       | 10544  | NM_006404    | 5031 | -0.45 | 0.31  | -0.99 | -1.09 | -0.93 | -0.58 | 0.88  | 1.99  | -0.53 | -1.13 | -2.59 | 2.34  |
| ZFP64       | 55734  | NM_199427    | 5032 | 0.22  | -0.43 | 0.19  | -1.30 | -1.25 | -0.93 | 1.25  | 0.80  | 0.28  | -0.02 | -3.48 | 2.34  |
| SLC25A1     | 6576   | NM_005084    | 5033 | 0.90  | 0.88  | 1.06  | 0.19  | 0.10  | 0.67  | 0.19  | 1.50  | 0.25  | 2.85  | 0.96  | 2.34  |
| TNN         | 63923  | NM_022093    | 5034 | 0.59  | 1.54  | 1.31  | -0.40 | 0.16  | 0.20  | 0.52  | 1.03  | 0.79  | 3.44  | 0.04  | 2.34  |
| TUB         | 7275   | NM_177972    | 5035 | 0.23  | 0.33  | 1.00  | 0.45  | 0.30  | -0.28 | 0.50  | 0.32  | 1.52  | 1.56  | 0.48  | 2.34  |
| UNC57R2     | 38783  | NM_0012998   | 5036 | -0.19 | 0.66  | 0.28  | -0.56 | -0.55 | -0.33 | 0.87  | 0.74  | 0.73  | 0.76  | -1.44 | 2.34  |
| LOC40673    | 40673  | NM_00101791  | 5037 | 0.53  | -0.98 | 0.48  | -1.24 | -0.13 | -0.73 | 1.62  | 0.74  | 1.46  | 0.03  | -2.11 | 2.34  |
| PGPL        | 8225   | NM_012227    | 5038 | 0.07  | -0.59 | -0.62 | -0.66 | -0.64 | -1.02 | 0.99  | 0.29  | 1.05  | -1.13 | -2.33 | 2.34  |
| SLC34A1     | 6569   | NM_003052    | 5039 | 1.00  | 0.40  | 0.67  | 0.08  | -0.32 | -0.13 | 0.72  | 0.42  | 1.19  | 2.08  | -0.37 | 2.34  |
| MTFRD11     | 9920   | NM_014867    | 5040 | 0.49  | 1.06  | 1.36  | 0.58  | 0.43  | 0.50  | 1.17  | 0.40  | 0.76  | 2.91  | 1.58  | 2.34  |
| MOBK2A      | 126108 | NM_130807    | 5041 | 0.08  | -0.23 | 0.15  | -1.20 | -1.39 | -0.73 | 1.11  | 0.30  | 0.92  | -0.01 | -3.32 | 2.33  |
| OLIG3       | 167826 | NM_175747    | 5042 | 1.32  | 0.09  | 0.48  | -0.31 | -0.18 | -0.45 | 1.17  | 0.06  | 1.10  | 1.89  | -0.94 | 2.33  |
| UL5477      | 21537  | NM_019138    | 5043 | 1.08  | 1.63  | 1.28  | 0.66  | 1.19  | 1.67  | 0.68  | 1.19  | 0.68  | 6.98  | 1.25  | 2.33  |
| SLC22A9     | 114571 | NM_080866    | 5044 | 1.55  | 0.56  | 1.03  | -0.50 | -0.86 | -0.63 | 0.80  | 0.35  | 1.18  | 3.14  | -1.99 | 2.33  |
| C22ORF8     | 55007  | NM_017911    | 5045 | 0.21  | 0.40  | -0.24 | -0.60 | -0.12 | -0.69 | 0.65  | 0.37  | 0.30  | 0.37  | -1.40 | 2.33  |
| IFP1        | 20807  | NM_040248    | 5046 | 1.00  | 2.52  | 1.80  | -0.73 | -1.02 | -1.10 | 1.00  | 0.22  | 1.10  | -0.12 | -0.73 | 2.33  |
| PF          | 26471  | NM_012385    | 5047 | 0.13  | -0.60 | 1.59  | -1.02 | 1.21  | -0.39 | 1.24  | -0.81 | 1.90  | 1.11  | 0.20  | 2.33  |
| SYT10       | 341359 | NM_198992    | 5048 | -0.44 | 0.46  | 0.43  | -1.02 | -0.75 | -0.97 | 0.51  | 1.13  | 0.69  | 0.45  | -2.74 | 2.33  |
| DNAIC1      | 64213  | NM_022365    | 5049 | -1.07 | -1.00 | -0.85 | -1.80 | -2.34 | -2.00 | 0.31  | 1.37  | 0.64  | -2.72 | -6.15 | 2.33  |
| BC1         | 23202  | NM_015162    | 5050 | 2.49  | 0.53  | 0.81  | -0.65 | -0.03 | -0.44 | 1.74  | 0.32  | 0.45  | 3.02  | 0.11  | 2.33  |
| MGC40407    | 284251 | NM_175911    | 5051 | 0.32  | 0.55  | 0.54  | -0.20 | -0.61 | -0.79 | 0.26  | 0.79  | 1.29  | 1.41  | -1.59 | 2.33  |
| FLJ01726    | 55216  | NM_001082969 | 5052 | 2.95  | 2.51  | 2.14  | 0.40  | 0.80  | 1.73  | 1.59  | 0.56  | 0.18  | 7.60  | 2.92  | 2.33  |
| EP3         | 793    | NM_017412    | 5053 | 0.10  | 1.35  | 0.58  | 0.16  | 0.24  | 0.16  | 0.58  | 0.74  | 0.56  | 1.03  | 1.05  | 2.33  |
| EMP3        | 2014   | NM_001425    | 5054 | 0.09  | 0.13  | 0.15  | -0.25 | -0.42 | -0.60 | 0.47  | 1.20  | 0.66  | 0.37  | -1.26 | 2.33  |
| VOC3        | 51481  | NM_016379    | 5055 | -0.27 | 0.24  | -0.29 | -0.85 | -1.43 | -0.99 | 0.25  | 1.65  | 0.43  | -0.33 | -3.26 | 2.33  |
| LOC420578   | 340578 | NM_001313028 | 5056 | 1.07  | -0.01 | 1.01  | -0.41 | -0.46 | -0.40 | 0.51  | 0.00  | 0.11  | 2.07  | -1.17 | 2.33  |
| PHF2        | 5253   | NM_024517    | 5057 | 7.82  | 13.38 | 9.64  | 5.51  | 6.13  | 4.82  | 0.88  | 0.76  | 0.69  | 30.84 | 17.46 | 2.33  |
| IGFBP2      | 3485   | NM_000597    | 5058 | -0.10 | -0.50 | -0.69 | -1.90 | -1.69 | -1.47 | 1.40  | 0.65  | 0.28  | -1.29 | -5.06 | 2.32  |
| EHADHD      | 13962  | NM_001966    | 5059 | 1.11  | 2.25  | 0.59  | -0.43 | -0.10 | -0.71 | 1.12  | 0.17  | 1.04  | 1.95  | -1.24 | 2.32  |
| AT7F07      | 8096   | NM_002497    | 5060 | 0.35  | 0.61  | 0.75  | 0.58  | 0.68  | 0.71  | 0.58  | 0.68  | 0.71  | 0.98  | 1.13  | 2.32  |
| ZNF345      | 25850  | NM_003419    | 5061 | 2.15  | 2.67  | 0.85  | -0.02 | -0.10 | 0.33  | 1.35  | 0.97  | 0.00  | 5.68  | 0.21  | 2.32  |
| CACH1       | 134526 | NM_130767    | 5062 | 1.25  | 0.29  | 1.44  | 0.68  | -0.40 | -0.05 | 1.08  | 0.13  | 1.11  | 2.98  | 0.22  | 2.32  |
| LOC181274   | 140860 | NM_0012074   | 5063 | 0.00  | 1.20  | 1.20  | 0.65  | 0.75  | 0.85  | 1.20  | 0.25  | 0.15  | 1.85  | 0.75  | 2.32  |
| LOC113828   | 113828 | NM_138435    | 5064 | 0.25  | -0.21 | 0.51  | -1.02 | -0.85 | -0.77 | 1.01  | 0.16  | 1.15  | 0.55  | -2.64 | 2.32  |
| RNF148      | 378925 | NM_198085    | 5065 | -0.08 | 1.62  | 0.79  | -0.92 | -0.43 | -0.59 | 0.32  | 1.17  | 0.83  | 2.33  | -1.93 | 2.32  |
| SLC20F6B    | 51277  | NM_006187    | 5066 | -0.12 | 0.75  | 0.65  | -0.70 | -0.12 | 0.75  | 1.12  | 0.75  | 1.12  | 0.55  | -0.25 | 2.32  |
| GYPC        | 2995   | NM_016815    | 5067 | 0.92  | 1.20  | 1.90  | -0.01 | 0.01  | 1.16  | 0.19  | 0.75  | 1.88  | 4.02  | 1.16  | 2.32  |
| SGOL1       | 151648 | NM_001012413 | 5068 | -0.73 | 0.62  | -0.97 | -1.34 | 0.66  | -1.33 | 1.88  | 0.09  | 0.34  | -1.08 | -2.01 | 2.31  |
| RAD23A      | 5888   | NM_005053    | 5069 | 1.45  | 0.40  | -0.32 | -0.52 | -0.59 | -0.71 | 1.32  | 0.79  | 0.20  | 1.54  | -1.83 | 2.31  |
| KAT1        | 9      | NM_000919    | 5070 | 1.81  | 0.87  | 0.60  | -0.47 | -0.40 | -0.67 | 0.40  | 0.67  | 0.40  | 3.28  | 1.49  | 2.31  |
| USCG11      | 56886  | NM_0020120   | 5071 | 0.40  | -0.22 | 0.32  | -0.42 | 0.19  | -0.98 | 0.86  | -0.09 | 1.53  | 0.51  | -1.22 | 2.31  |
| CTFD4       | 163732 | NM_133467    | 5072 | 2.55  | 0.27  | 0.10  | -0.34 | -0.31 | -0.73 | 1.67  | 0.41  | 0.23  | 2.91  | -1.39 | 2.31  |
| IFP1        | 2658   | NM_014571    | 5073 | 0.62  | 0.15  | 1.84  | -1.07 | -0.65 | -0.40 | 1.14  | 0.80  | 0.43  | 1.32  | 0.66  | 2.31  |
| DERP6       | 23587  | NM_203415    | 5074 | 0.02  | 1.75  | -0.13 | 0.00  | -0.06 | -0.41 | 1.14  | 1.48  | 0.69  | 1.64  | -0.47 | 2.31  |
| FLJ2371     | 152940 | NM_152543    | 5075 | 0.72  | 1.21  | 0.28  | -0.68 | -0.13 | -0.48 | 0.89  | 0.69  | 0.73  | 2.21  | -1.29 | 2.31  |
| HTA2        | 2624   | NM_001638    | 5076 | -0.76 | -0.77 | 0.16  | -0.77 | -0.78 | -0.77 | 1.13  | 1.02  | 1.16  | -2.35 | -4.14 | 2.31  |
| ANKRD28     | 23243  | NM_015199    | 5077 | 1.71  | 1.09  | 0.84  | -0.02 | -0.09 | -0.06 | 0.96  | 0.75  | 0.59  | 3.65  | 0.18  | 2.30  |
| TMED8       | 283578 | NM_213601    | 5078 | 0.59  | 1.01  | 0.85  | 2.73  | 1.89  | 3.22  | 0.12  | 2.00  | 0.18  | 2.45  | 7.84  | 2.30  |
| FCER1A      | 2205   | NM_002001    | 5079 | -0.10 | 1.23  | 0.56  | -0.39 | -0.99 | -0.54 | 0.05  | 1.60  | 0.65  | 1.69  | -1.92 | 2.30  |
| CPNE2       | 22148  | NM_152727    | 5080 | 1.23  | 1.61  | 0.56  | -0.49 | -0.16 | -0.54 | 1.76  | 0.56  | 0.56  | 2.89  | 0.56  | 2.30  |
| PALD        | 27143  | NM_014431    | 5081 | 1.58  | 1.64  | 1.98  | 1.76  | 0.33  | 0.11  | -0.02 | 0.97  | 1.34  | 5.19  | 2.21  | 2.30  |
| LOC2        | 353174 | NM_180990    | 5082 | 0.16  | 1.64  | 0.60  | 0.40  | 0.25  | -0.49 | 0.13  | 0.83  | 1.34  | 2.40  | -0.21 | 2.30  |
| SGCB        | 644    | NM_003212    | 5083 | 1.14  | 1.47  | 1.62  | 0.14  | 0.17  | 0.14  | 0.12  | 1.47  | 1.62  | 4.43  | 0.49  | 2.30  |
| KAB         | 9859   | NM_014812    | 5084 | 1.96  | 1.01  | 1.76  | 0.22  | 1.17  | -0.48 | 1.08  | 0.01  | 1.21  | 4.72  | 0.92  | 2.30  |
| KRTAP6-3    | 337968 | NM_181605    | 5085 | 0.08  | -0.22 | -0.52 | -1.23 | -0.87 | -1.20 | 1.96  | 0.22  | 0.12  | -0.66 | -3.30 | 2.30  |
| LOC10133653 | 38883  | NM_00133653  | 5086 | -1.10 | -0.41 | -0.60 | -0.81 | -0.81 | -0.81 | 0.52  | 0.11  | 1.63  | -2.31 | -4.07 | 2.30  |
| FLJ3046     | 164590 | NM_152612    | 5087 | 0.36  | 0.19  | 1.24  | -1.25 | -0.65 | 0.02  | 0.68  | 1.24  | 0.88  | 1.07  | -1.88 | 2.30  |
| FLJ20699    | 55020  | NM_017931    | 5088 | -2.08 | 0.03  | 1.83  | 0.11  | -0.55 | -0.50 | 1.10  | 0.39  | 2.00  | 1.66  | -0.93 | 2.30  |
| HS3T1A1     | 9955   | NM_006042    | 5089 | 2.38  | 1.87  | 0.75  | 1.15  | 0.93  | 0.03  | 0.48  | 0.70  | 1.12  | 5.00  | 2.11  | 2.30  |
| LOC1013242  | 136442 | NM_001000270 | 5090 | 0.72  | 1.00  | 1.22  | -0.60 | -0.67 | -0.52 | 0.47  | 0.52  | 0.45  | 2.94  | 1.58  | 2.30  |
| LOC90410    | 90410  | NM_174887    | 5091 | 1.29  | 0.98  | 0.44  | -0.72 | -0.54 | -0.19 | 1.03  | 0.87  | 0.40  | 2.71  | -1.45 | 2.30  |
| MVOZ2       | 51778  | NM_016599    | 5092 | 0.19  | 1.89  | 1.18  | -0.40 | -0.20 | -0.14 | 0.33  | 1.45  | 0.52  | 3.26  | -0.39 | 2.30  |
| LOC113811   | 389    | NM_001701    | 5093 | 1.07  | 0.44  | 1.44  | -0.19 | -0.19 | -0.19 | 0.42  | 0.42  | 0.42  | 0.70  | 0.49  | 2.30  |
| CKN         | 8812   | NM_003858    | 5094 | 0.19  | -0.47 | 0.32  | -1.70 | -1.56 | -1.56 | 1.38  | -0.34 | 1.26  | 0.04  | -4.82 | 2.29  |
| CNTN3       | 5067   | NM_02        |      |       |       |       |       |       |       |       |       |       |       |       |       |



|           |        |              |      |       |       |       |       |       |       |       |       |       |       |       |      |
|-----------|--------|--------------|------|-------|-------|-------|-------|-------|-------|-------|-------|-------|-------|-------|------|
| MGC34799  | 284359 | NM_182575    | 5177 | 0.62  | 0.73  | 1.52  | -0.09 | -0.79 | 0.16  | 0.10  | 1.34  | 0.79  | 2.87  | -0.72 | 2.24 |
| SEPH9A    | 37655  | NM_175739    | 5178 | 1.44  | 1.58  | 2.00  | 0.10  | 0.44  | 0.62  | 0.44  | 1.14  | 0.64  | 3.00  | 0.92  | 2.04 |
| REC2      | 5982   | NM_002914    | 5179 | 0.66  | 1.39  | 1.06  | 0.03  | -0.55 | -0.10 | 0.30  | 1.42  | 0.51  | 3.10  | 0.62  | 2.24 |
| GNIG12    | 55970  | NM_018841    | 5180 | 1.92  | 1.71  | 2.81  | 1.76  | 1.10  | 2.06  | 1.03  | 0.92  | 0.28  | 6.45  | 4.92  | 2.24 |
| NT1       | 4837   | NM_005600    | 5181 | -0.08 | -0.27 | -1.16 | 2.32  | -2.37 | 1.34  | -0.31 | 3.54  | -0.99 | -1.51 | 1.29  | 2.24 |
| NETD      | 5447   | NM_030010    | 5182 | 0.20  | 0.20  | 1.16  | 0.30  | 0.18  | 0.12  | 0.72  | 0.40  | 0.74  | 1.74  | 0.02  | 2.24 |
| ZNF211    | 10520  | NM_198855    | 5183 | 1.12  | 1.09  | 1.14  | 0.27  | 0.44  | -0.37 | 1.21  | 0.01  | 1.01  | 3.35  | -0.20 | 2.23 |
| CDORF7    | 79133  | NM_00139375  | 5184 | 0.07  | 0.31  | 0.18  | -1.30 | -0.76 | -1.00 | 0.87  | 0.50  | 0.87  | 0.57  | -0.06 | 2.23 |
| WCA1      | 23513  | NM_172228    | 5185 | 0.49  | 1.51  | 2.22  | 0.85  | 0.63  | 0.63  | 0.34  | 2.00  | 0.12  | 3.33  | 0.52  | 2.23 |
| TFAP2B1   | 83741  | NM_172228    | 5186 | 1.93  | 1.08  | 1.77  | 0.37  | 0.35  | 0.93  | 1.23  | 0.57  | 0.44  | 4.78  | 1.65  | 2.23 |
| RUNDIC1   | 146923 | NM_173079    | 5187 | 0.48  | 0.70  | 1.97  | 0.12  | 0.29  | -0.30 | 0.08  | 0.10  | 2.06  | 3.15  | 0.10  | 2.23 |
| ND2       | 4835   | NM_001848    | 5188 | -0.68 | -0.34 | 1.41  | 0.21  | 1.51  | 0.41  | -0.17 | 0.21  | 1.51  | 0.20  | -0.29 | 2.23 |
| CAMM4     | 814    | NM_001744    | 5189 | 0.51  | 0.05  | -0.02 | -0.77 | -0.41 | -0.19 | 2.03  | 0.11  | 0.10  | 0.43  | -1.37 | 2.23 |
| ARHGAP25  | 9938   | NM_014882    | 5190 | -0.51 | 0.00  | -0.15 | -0.68 | -0.80 | -0.56 | 0.46  | 0.85  | 0.92  | -0.66 | -2.05 | 2.23 |
| RTN       | 29514  | NM_173630    | 5191 | -0.05 | 1.29  | 1.29  | 0.06  | 0.00  | -0.31 | 0.16  | 1.08  | 0.99  | 2.53  | -0.37 | 2.23 |
| ZNF42     | 9668   | NM_014650    | 5192 | 2.34  | 1.18  | 0.64  | 1.38  | 0.87  | 0.54  | 1.70  | 0.51  | 0.00  | 4.17  | 0.78  | 2.23 |
| IBRDC1    | 154214 | NM_152553    | 5193 | 0.58  | 11.37 | 9.61  | 2.95  | 3.07  | 2.09  | -0.45 | 0.69  | 1.99  | 21.57 | 8.11  | 2.23 |
| TA1       | 6872   | NM_138923    | 5194 | -0.99 | -0.82 | -1.30 | -1.91 | -1.78 | -1.99 | 0.72  | 1.16  | 0.35  | -3.11 | -5.64 | 2.23 |
| GPB       | 2294   | NM_002100    | 5195 | 0.89  | 0.66  | 0.94  | -0.21 | 0.22  | -0.60 | 0.52  | -0.02 | 1.73  | 2.49  | 0.59  | 2.23 |
| ZNF510    | 22869  | NM_014930    | 5196 | 0.08  | 1.78  | -0.05 | -1.24 | 0.05  | -0.79 | 1.38  | 0.58  | 0.27  | 1.21  | -1.98 | 2.23 |
| CDORF17   | 128553 | NM_173485    | 5197 | 1.05  | -0.08 | 0.35  | -0.51 | -0.47 | -0.05 | 1.25  | 0.07  | 0.91  | 1.32  | -1.03 | 2.22 |
| RTN7      | 51350  | NM_015488    | 5198 | -0.65 | -0.71 | -0.43 | -1.77 | -1.27 | -1.43 | 1.14  | 0.32  | 0.96  | -1.79 | -4.46 | 2.22 |
| KIA1128   | 57536  | NM_020776    | 5199 | 0.52  | 1.12  | 1.22  | -0.32 | -0.20 | 0.58  | -0.22 | 0.93  | 1.51  | 1.82  | 0.05  | 2.22 |
| AMPD3     | 272    | NM_001025389 | 5200 | 0.11  | -0.16 | 0.61  | 0.15  | -0.84 | 0.40  | 0.19  | 0.30  | 1.73  | 0.56  | -0.29 | 2.22 |
| LOC139067 | 139067 | NM_001096009 | 5201 | 0.21  | -0.57 | -0.21 | -1.12 | -1.01 | -0.63 | 0.80  | 0.27  | 1.15  | -0.57 | -0.75 | 2.22 |
| PRO1      | 57136  | NM_002066    | 5202 | 0.08  | 0.61  | 0.32  | -0.45 | -1.06 | 0.53  | 0.27  | 0.66  | 1.29  | -0.21 | -2.24 | 2.22 |
| PFAS      | 5198   | NM_012393    | 5203 | 0.68  | 0.20  | 0.44  | -0.71 | 0.15  | -0.79 | 0.87  | 0.55  | 0.80  | 1.31  | -1.35 | 2.22 |
| SPATA7    | 55812  | NM_001040428 | 5204 | 0.03  | 1.52  | 0.08  | -0.62 | -0.22 | -0.09 | 0.64  | 1.49  | 0.09  | 1.63  | -0.93 | 2.22 |
| RTN7      | 10745  | NM_005600    | 5205 | 0.16  | 0.79  | 1.74  | 0.48  | 0.89  | -0.49 | 0.79  | 0.79  | 0.99  | 1.92  | 0.99  | 2.22 |
| DZAP2     | 9802   | NM_014764    | 5206 | -0.60 | -0.25 | 0.15  | -0.80 | -1.13 | -1.24 | -0.43 | 1.04  | 1.60  | -0.70 | -1.17 | 2.21 |
| JAR1      | 3903   | NM_021708    | 5207 | -0.82 | -0.91 | -0.90 | -1.74 | -1.59 | -1.23 | 1.14  | 0.64  | 0.44  | -2.63 | -4.56 | 2.21 |
| CDORF59   | 11684  | NM_001381    | 5208 | 0.81  | 0.52  | 0.21  | 0.80  | -0.75 | 0.13  | 0.20  | 0.82  | 0.13  | 1.13  | -1.44 | 2.21 |
| ZNF397    | 84307  | NM_023247    | 5209 | 0.30  | 0.28  | 0.90  | -0.27 | -0.22 | -1.10 | 0.85  | 0.15  | 1.22  | 1.48  | -1.59 | 2.21 |
| AKR1B10   | 57016  | NM_020299    | 5210 | 0.15  | 0.24  | -0.53 | -0.31 | -1.20 | -0.81 | 0.49  | 1.38  | 0.34  | -1.44 | -2.32 | 2.21 |
| GARNL1    | 235959 | NM_194301    | 5211 | 4.04  | 1.88  | 1.61  | 1.77  | 0.65  | 0.68  | 0.63  | 1.23  | 0.36  | 7.54  | 3.10  | 2.21 |
| ANGPT1    | 24452  | NM_012998    | 5212 | 0.56  | 0.56  | 1.37  | 0.17  | 0.62  | 0.59  | 0.13  | 0.20  | 0.12  | 3.10  | 3.52  | 2.21 |
| SHANK3    | 85358  | NM_037493    | 5213 | 2.45  | 2.87  | 3.70  | 1.36  | 0.57  | 1.95  | 0.11  | 1.28  | 0.81  | 9.02  | 3.87  | 2.21 |
| FAM8C     | 171484 | NM_174901    | 5214 | 1.31  | 0.57  | 1.03  | -0.94 | -0.32 | 0.30  | 1.21  | 0.40  | 0.60  | 2.92  | -0.96 | 2.21 |
| ZNF256    | 25796  | NM_020888    | 5215 | -0.19 | 0.37  | 0.24  | -0.62 | -0.14 | 0.22  | 0.12  | 0.29  | 0.62  | 0.66  | 0.26  | 2.21 |
| FLJ12110  | 219578 | NM_181646    | 5216 | 0.12  | 1.50  | 1.47  | 0.05  | -0.68 | 0.14  | -0.13 | 1.85  | 0.49  | 3.09  | -0.49 | 2.21 |
| RAX       | 30062  | NM_013435    | 5217 | 1.06  | 0.13  | -0.11 | -1.04 | -0.54 | -0.71 | 1.10  | 0.46  | 0.64  | 1.08  | -0.29 | 2.21 |
| FRP1      | 7349   | NM_002192    | 5218 | 1.75  | 0.50  | 1.17  | 0.22  | 0.65  | 0.44  | 1.38  | 0.27  | 0.84  | 2.82  | 0.87  | 2.21 |
| CAMSAP1   | 15792  | NM_015447    | 5219 | 0.75  | 0.56  | 1.45  | -0.01 | 0.27  | 0.19  | 0.52  | 0.23  | 1.45  | 2.75  | 0.07  | 2.21 |
| PPP1C     | 5501   | NM_002710    | 5220 | -0.43 | -0.43 | -0.13 | -1.75 | -0.45 | 1.03  | 2.08  | 0.45  | -0.32 | -0.98 | -1.17 | 2.21 |
| ZCDORF3   | 150082 | NM_152505    | 5221 | 1.18  | 0.77  | 1.14  | -0.78 | -0.31 | 0.16  | 1.40  | 0.29  | 0.51  | 3.29  | -0.92 | 2.21 |
| ROD1      | 8032   | NM_024991    | 5222 | 1.31  | 0.57  | 0.32  | 0.25  | 0.41  | 0.62  | 0.31  | 0.20  | 0.15  | 2.19  | 0.15  | 2.21 |
| ATPA4     | 495    | NM_000704    | 5223 | -0.15 | 0.62  | 1.28  | -0.39 | -0.28 | 0.23  | 0.30  | 1.07  | 0.84  | 1.75  | -0.44 | 2.21 |
| MTBP      | 27085  | NM_022045    | 5224 | -0.60 | -0.97 | -1.07 | -1.96 | -1.54 | -2.16 | 1.08  | 0.44  | 0.68  | -2.64 | -5.65 | 2.21 |
| ROD1      | 8032   | NM_024991    | 5225 | 1.03  | 1.48  | 1.52  | 0.42  | 0.52  | 0.42  | 0.42  | 0.52  | 0.04  | 3.50  | 1.20  | 2.21 |
| PM6B      | 5694   | NM_002798    | 5226 | -1.37 | -0.95 | -0.40 | -2.74 | -2.48 | -2.10 | 1.11  | 0.20  | 0.89  | -3.26 | -7.32 | 2.20 |
| LOC51054  | 51054  | NM_015899    | 5227 | 0.59  | -0.12 | 0.61  | -0.84 | -0.18 | -0.21 | 1.15  | 0.67  | 0.38  | 1.07  | -1.24 | 2.20 |
| FRAT2     | 23407  | NM_012083    | 5228 | 4.89  | 0.62  | 0.62  | 1.62  | 1.48  | 0.59  | 1.46  | 1.26  | 0.64  | 8.17  | 0.68  | 2.20 |
| CDORF103  | 24144  | NM_012261    | 5229 | 0.35  | -0.39 | -0.65 | -1.56 | -1.36 | -1.36 | 1.13  | 0.81  | 0.26  | -1.89 | -4.47 | 2.20 |
| CEACAM7   | 1087   | NM_006890    | 5230 | -1.26 | -1.10 | -0.82 | -2.05 | -2.56 | -2.33 | -0.47 | 0.47  | 2.20  | -3.18 | -6.93 | 2.20 |
| DFB137    | 61310  | NM_001330218 | 5231 | 0.13  | 0.46  | 1.28  | 1.35  | 0.26  | 1.24  | -0.03 | 1.29  | 0.91  | 1.87  | 2.86  | 2.19 |
| ZNF5045   | 7112   | NM_001005    | 5232 | 3.63  | 0.82  | 1.74  | 1.47  | 1.46  | 0.42  | 1.38  | 0.71  | 1.19  | 11.19 | 7.56  | 2.19 |
| COL4AE    | 1288   | NM_001847    | 5233 | 2.51  | 0.98  | 1.91  | -0.17 | 0.29  | 1.11  | 0.37  | 0.72  | 5.40  | 0.36  | 2.19  |      |
| KIA1441   | 57592  | NM_020812    | 5234 | -0.62 | -0.73 | 0.06  | -1.57 | -1.62 | -0.99 | 0.89  | 0.58  | 0.71  | -1.29 | -1.18 | 2.19 |
| TLR8      | 5111   | NM_016610    | 5235 | 1.90  | 1.38  | 1.60  | 0.14  | 0.17  | 0.21  | 1.19  | 0.42  | 0.11  | 7.55  | 0.98  | 2.19 |
| KRTAP5-11 | 440051 | NM_001005405 | 5236 | 0.97  | 0.21  | 1.45  | -1.03 | -0.10 | -0.15 | 1.24  | 0.28  | 0.67  | 2.63  | -1.28 | 2.19 |
| CRP7      | 9441   | NM_004831    | 5237 | -0.63 | 1.23  | 0.29  | 0.21  | -0.62 | -0.05 | -0.36 | 2.29  | 0.26  | 0.90  | -0.46 | 2.19 |
| SLC39A1   | 23556  | NM_015859    | 5238 | 0.79  | 0.08  | 0.45  | -0.17 | 0.08  | -0.45 | 0.14  | 0.89  | 0.93  | 0.43  | -0.18 | 2.19 |
| CDORF80   | 25901  | NM_015439    | 5239 | 0.41  | 0.59  | -0.51 | -0.64 | -0.82 | -0.98 | 0.51  | 1.03  | 0.65  | 0.49  | -2.44 | 2.19 |
| KIA1889   | 114786 | NM_052898    | 5240 | 0.92  | 0.45  | 0.90  | -0.36 | -0.67 | -0.35 | 0.84  | 0.55  | 0.80  | 2.27  | -1.38 | 2.19 |
| SNRPA     | 6626   | NM_004596    | 5241 | -0.65 | 0.30  | 0.63  | -1.31 | -0.45 | -0.74 | -0.22 | 1.81  | 0.60  | 0.28  | -2.49 | 2.19 |
| ZNF504    | 117186 | NM_040032    | 5242 | 0.27  | 0.24  | 0.57  | 0.24  | 0.24  | 0.24  | 0.24  | 0.24  | 0.24  | 0.24  | 0.24  | 2.19 |
| JAM2      | 58494  | NM_021219    | 5243 | -0.04 | 0.92  | -1.10 | -0.38 | -0.40 | -0.71 | 0.63  | 0.95  | 0.61  | 0.77  | -1.49 | 2.19 |
| LOC150379 | 150379 | NM_138814    | 5244 | -0.19 | 1.72  | 0.38  | -0.44 | -0.59 | 0.25  | -0.45 | 2.36  | 0.28  | 1.91  | -0.78 | 2.19 |
| ROD1      | 8032   | NM_024991    | 5245 | 0.52  | 0.52  | 0.52  | 0.52  | 0.52  | 0.52  | 0.52  | 0.52  | 0.52  | 0.52  | 0.52  | 2.19 |
| VANGL1    | 81839  | NM_138959    | 5246 | 0.94  | 0.50  | 0.05  | 0.00  | -0.29 | 0.63  | 2.35  | 0.15  | -0.32 | 1.49  | 0.34  | 2.18 |
| LOC283337 | 283337 | NM_00104304  | 5247 | -0.18 | -0.60 | -1.21 | -1.64 | -1.50 | -1.24 | 2.21  | 0.31  | -0.33 | -1.99 | -4.37 | 2.18 |
| ROD1      | 8032   | NM_024991    | 5248 | -0.04 | -0.50 | 0.00  | -0.35 | -0.60 | 0.30  | 0.46  | 0.30  | 0.30  | 0.30  | 0.30  | 2.18 |
| RNF133    | 168433 | NM_139175    | 5249 | 0.30  | 0.28  | 0.38  | 0.03  | -0.71 | 0.79  | 0.44  | 1.25  | 1.37  | 0.35  | -1.47 | 2.18 |
| AMMECR1   | 9949   | NM_001025280 | 5250 | 0.81  | 1.92  | 0.69  | -0.73 | -0.33 | -0.61 | 0.57  | 1.04  | 0.57  | 3.41  | -1.67 | 2.18 |
| MGC731    | 79033  | NM_024058    | 5251 | -0.85 | 0.24  | 0.08  | -1.02 | -1.37 | -0.97 | 1.29  | 1.61  | 0.87  | -0.55 | -3.86 | 2.18 |
| RBR4      | 5932   | NM_005610    | 5252 | 1.13  | 1.46  | 1.99  | 1.36  | 0.92  | 0.49  | 1.36  | 0.92  | 0.99  | 2.99  | 0.55  | 2.18 |
| FBLP-1    | 54751  | NM_001024215 | 5253 | -0.13 | 3.48  | -1.70 | -1.20 | -0.99 | -1.63 | 0.64  | 2.25  | 0.71  | 1.65  | -3.82 | 2.18 |
| RBP5UH    | 3516   | NM_202383    | 5254 | 0.25  | 0.22  | 1.43  | 0.64  | -0.57 | -0.64 | 0.29  | 0.44  | 1.44  | 1.89  | -1.85 | 2.18 |
| FRN       | 5927   | NM_032129    | 5255 | 1.29  | 1.85  | 1.89  | 0.18  | 0.18  | 0.18  | 0.18  | 0.18  | 0.18  | 0.18  | 0.18  | 2.18 |
| ZNF493    | 7128   | NM_006290    | 5256 | 0.98  | 0.90  | 1.17  | 0.09  | -0.71 | 0.01  | 0.37  | 1.22  | 0.59  | 3.05  | 0.61  | 2.18 |
| RND3      | 8780   | NM_003831    | 5257 | 0.52  | 0.    |       |       |       |       |       |       |       |       |       |      |

|             |        |              |      |       |       |       |       |       |       |       |       |       |       |       |      |
|-------------|--------|--------------|------|-------|-------|-------|-------|-------|-------|-------|-------|-------|-------|-------|------|
| LHK2        | 9355   | NM_004789    | 5339 | -0.26 | 0.41  | 0.83  | 0.19  | -0.43 | -0.62 | -0.50 | 0.07  | 1.54  | 0.98  | -0.87 | 2.11 |
| LJ11025     | 57495  | NM_02023232  | 5340 | -0.82 | 0.51  | 0.67  | 0.35  | -0.82 | -0.67 | 0.36  | 1.44  | 1.26  | 1.61  | -1.48 | 2.11 |
| LKA1465     | 57611  | NM_020851    | 5341 | 0.17  | 0.14  | -0.98 | -0.83 | -0.48 | -0.94 | 1.52  | 0.70  | -0.11 | -0.67 | -2.25 | 2.11 |
| CR11        | 23741  | NM_014335    | 5342 | 1.32  | 2.00  | 1.11  | 0.68  | 0.93  | -0.46 | 0.08  | 0.82  | 1.21  | 4.73  | 1.14  | 2.11 |
| SULB781     | 39346  | NM_00152277  | 5343 | 0.54  | 1.61  | -0.22 | 0.18  | -0.47 | -0.37 | 0.34  | 2.01  | -0.25 | 1.93  | -0.66 | 2.10 |
| TRM14       | 9830   | NM_030901    | 5344 | 1.68  | 1.72  | 1.26  | 0.67  | 0.89  | 0.76  | 0.59  | 0.76  | 0.32  | 4.66  | 1.23  | 2.10 |
| OR7A17      | 26333  | NM_030901    | 5345 | 0.54  | 1.41  | 0.84  | 0.22  | 0.40  | -0.43 | 0.16  | 0.90  | 1.04  | 2.79  | 2.00  | 2.10 |
| CLC4C       | 26253  | NM_014558    | 5346 | 1.84  | 0.64  | 1.81  | 0.33  | 0.78  | 0.35  | 0.95  | -0.32 | 1.47  | 4.30  | 1.46  | 2.10 |
| MGC2643     | 116373 | NM_015232    | 5347 | -0.18 | 0.86  | 0.74  | -0.17 | -0.86 | -0.47 | 1.18  | 1.45  | 0.65  | 2.77  | 1.10  | 2.10 |
| Q5C5C       | 440073 | NM_015232    | 5348 | -0.26 | 0.64  | -0.62 | -0.95 | -0.47 | 0.00  | 1.85  | -0.15 | 0.40  | -1.53 | -1.41 | 2.10 |
| ADAM20      | 8748   | NM_003814    | 5349 | -1.16 | 0.32  | -0.34 | -1.26 | -1.39 | -0.50 | -0.38 | 2.20  | 0.27  | -1.18 | -3.15 | 2.10 |
| NLI         | 4287   | NM_030903    | 5350 | 0.87  | 0.62  | 0.37  | 0.55  | -0.62 | 0.35  | 1.22  | 0.62  | 0.37  | 2.16  | 0.24  | 2.10 |
| CGORF3      | 113402 | NM_145169    | 5351 | 0.89  | 1.96  | 1.72  | 0.79  | 0.54  | 0.38  | 0.04  | 1.27  | 0.79  | 5.57  | 1.71  | 2.10 |
| OSR2        | 8624   | NM_203433    | 5352 | 1.40  | 1.77  | 1.71  | 0.33  | 0.16  | -0.05 | 0.61  | 0.89  | 0.59  | 4.88  | 0.44  | 2.10 |
| UBI28       | 7320   | NM_003337    | 5353 | -0.05 | 0.67  | 0.26  | 0.75  | -0.10 | -0.42 | 0.11  | 1.46  | 0.52  | 0.88  | -1.27 | 2.09 |
| ZNF101      | 94939  | NM_033004    | 5354 | -0.82 | 0.14  | -0.31 | -0.11 | -0.83 | -0.51 | 0.78  | 1.32  | 1.56  | 0.99  | 1.55  | 2.09 |
| SGLEC9      | 27180  | NM_014441    | 5355 | 1.73  | 0.55  | 1.32  | 0.48  | 0.16  | 0.30  | 1.60  | 0.23  | 0.26  | 3.59  | 0.62  | 2.09 |
| PRKCE1      | 144165 | NM_153026    | 5356 | 0.88  | 0.92  | -0.19 | 0.45  | 0.56  | 0.03  | 1.58  | 0.65  | -0.14 | 1.60  | 1.04  | 2.09 |
| PTGCS       | 9536   | NM_000478    | 5357 | -1.11 | -0.99 | -0.79 | -1.63 | -1.97 | -1.86 | -0.01 | 0.88  | 1.22  | -2.92 | -5.46 | 2.09 |
| MGC3794     | 261726 | NM_001031800 | 5358 | 0.77  | -0.17 | -0.68 | -0.73 | -0.57 | -0.85 | 1.79  | 0.06  | 0.24  | -0.08 | -1.15 | 2.09 |
| OR3A3       | 8392   | NM_012373    | 5359 | 0.85  | 0.36  | 0.39  | -0.52 | 0.92  | 0.63  | 1.69  | 0.08  | 0.32  | 1.60  | 1.03  | 2.09 |
| LJ20655     | 132320 | NM_144643    | 5360 | 0.10  | 0.29  | 0.86  | -0.46 | -1.22 | -0.32 | 0.23  | 1.34  | 0.52  | 1.25  | -1.99 | 2.09 |
| PRMF5       | 9647   | NM_014634    | 5361 | 1.51  | 2.38  | 2.55  | 1.09  | 2.37  | 0.68  | 0.25  | 0.11  | 1.73  | 6.44  | 4.13  | 2.09 |
| TFPA        | 7274   | NM_000370    | 5362 | 0.86  | -0.04 | 0.94  | 0.38  | 0.04  | 0.25  | 1.41  | -0.10 | 0.78  | 1.77  | 0.67  | 2.09 |
| AFD0        | 347    | NM_001547    | 5363 | 0.33  | 0.99  | 0.37  | -0.33 | 0.20  | -0.26 | 1.03  | 0.57  | 0.49  | 1.69  | -0.40 | 2.09 |
| ADRA14      | 148    | NM_033004    | 5364 | 2.25  | 2.31  | 1.21  | 0.67  | 0.99  | -0.21 | 0.65  | 0.49  | 0.95  | 5.77  | 1.45  | 2.09 |
| LOC55158    | 553158 | NM_181334    | 5365 | -0.47 | -0.69 | 0.77  | -0.17 | -0.06 | -0.18 | 1.23  | -0.42 | 1.28  | 0.55  | -0.07 | 2.09 |
| N9F8        | 4803   | NM_002506    | 5366 | -1.72 | -1.53 | -0.69 | -2.54 | -2.36 | -1.80 | 0.58  | -0.39 | 1.90  | -3.94 | -6.76 | 2.08 |
| LOC13590    | 162886 | NM_150234    | 5367 | 0.64  | 0.64  | -0.04 | -0.67 | -1.42 | -0.45 | 1.42  | 0.17  | 0.45  | 0.47  | 1.21  | 2.08 |
| TP52        | 8469   | NM_003595    | 5368 | 0.75  | 1.95  | 1.56  | 0.70  | 1.57  | 0.31  | 0.20  | 0.71  | 1.18  | 4.25  | 2.59  | 2.08 |
| HSU7903     | 29903  | NM_013301    | 5369 | 0.37  | 0.31  | 2.41  | 0.19  | -0.55 | -0.08 | 0.10  | 0.28  | 1.71  | 3.10  | -0.44 | 2.08 |
| SLM         | 567    | NM_030908    | 5370 | 0.18  | 0.54  | 1.12  | 0.57  | 0.73  | 0.76  | 0.53  | 0.47  | 0.64  | 1.84  | -1.54 | 2.08 |
| SLC36A3     | 28544  | NM_181774    | 5371 | 0.64  | 0.64  | 1.07  | 0.68  | -0.58 | 0.04  | 0.78  | 0.54  | 0.76  | 2.34  | 1.36  | 2.08 |
| DKFZP861061 | 26173  | NM_001080453 | 5372 | 0.68  | -0.55 | 0.30  | -0.66 | -0.96 | -0.91 | 0.87  | 0.27  | 0.94  | 0.43  | -2.53 | 2.08 |
| SOT         | 50984  | NM_025237    | 5373 | 2.58  | 0.56  | 1.35  | 0.70  | 0.60  | 0.29  | 0.99  | 0.31  | 0.78  | 4.49  | 1.58  | 2.08 |
| MGC353689   | 653689 | NM_000909    | 5374 | 0.78  | 0.00  | 0.09  | 0.68  | 0.01  | 0.68  | 0.41  | 0.68  | 0.41  | 1.34  | 0.99  | 2.08 |
| GRP24       | 2847   | NM_005297    | 5375 | 1.27  | -0.09 | 0.35  | -0.78 | -0.77 | -0.68 | 1.31  | 0.27  | 0.49  | 1.53  | -2.23 | 2.08 |
| OST1        | 26578  | NM_012383    | 5376 | 1.20  | 1.58  | 1.10  | 0.44  | 0.43  | -0.31 | 0.86  | 0.35  | 0.87  | 4.58  | 0.56  | 2.07 |
| NPC2        | 1057   | NM_006412    | 5377 | 0.01  | 1.05  | 0.45  | -0.17 | -0.26 | -0.45 | 1.17  | 0.45  | 1.18  | 0.39  | 0.01  | 2.07 |
| KCNB2       | 9312   | NM_004770    | 5378 | 1.28  | 1.59  | 0.97  | 1.91  | 2.08  | 1.00  | 0.71  | 0.43  | 0.93  | 3.85  | 5.00  | 2.07 |
| NOL1        | 5443   | NM_023993    | 5379 | -0.89 | -0.71 | -0.76 | -1.05 | -0.41 | -0.20 | 2.66  | 0.21  | -0.39 | -1.56 | -1.66 | 2.07 |
| ADAM23      | 21378  | NM_000993    | 5380 | 0.90  | 1.08  | 2.15  | 0.78  | 1.62  | 1.59  | 0.62  | 0.68  | 0.43  | 1.88  | -1.40 | 2.07 |
| LOC139123   | 339123 | NM_001005920 | 5381 | 0.35  | -0.41 | 1.08  | 0.64  | 0.17  | -0.03 | 1.02  | -0.05 | 1.10  | 1.03  | 0.78  | 2.07 |
| DPF8        | 54878  | NM_017743    | 5382 | -1.00 | 0.33  | -0.15 | -1.33 | -0.74 | -0.97 | 0.74  | 0.49  | 0.84  | 0.09  | -3.04 | 2.07 |
| LOC8298     | 80298  | NM_025198    | 5383 | -0.07 | 0.52  | 0.12  | -0.82 | 0.01  | -0.89 | 0.75  | 0.37  | 0.95  | 0.56  | -1.67 | 2.07 |
| MG          | 2022   | NM_000118    | 5384 | 0.65  | 0.69  | 1.44  | 0.86  | -0.36 | -0.41 | 0.88  | 0.41  | 0.49  | 1.49  | 1.97  | 2.07 |
| PEX2        | 55670  | NM_017929    | 5385 | 0.27  | 0.13  | 0.75  | -0.47 | -0.46 | -0.93 | 0.21  | 0.26  | 1.61  | 1.15  | -1.87 | 2.07 |
| SH3M01      | 9644   | NM_014631    | 5386 | 2.06  | 1.04  | 0.79  | 0.26  | 0.82  | 0.05  | 1.10  | 0.21  | 0.76  | 3.89  | 1.12  | 2.07 |
| NM1002      | 2384   | NM_000126    | 5387 | 0.44  | 1.02  | 0.14  | 0.44  | 1.70  | 0.42  | 1.02  | 0.44  | 1.12  | 1.28  | 1.28  | 2.07 |
| ZNF431      | 170959 | NM_133473    | 5388 | 0.53  | 0.98  | 2.06  | -0.27 | -0.76 | 0.29  | 0.17  | 0.77  | 1.13  | 3.56  | 0.74  | 2.07 |
| COA52       | 164022 | NM_178230    | 5389 | -0.60 | 0.31  | -0.77 | -1.30 | -1.17 | -1.09 | 0.28  | 1.31  | 0.48  | 1.10  | -3.56 | 2.07 |
| SLR         | 347    | NM_201526    | 5390 | 0.22  | 1.17  | 1.00  | 0.38  | 0.12  | 0.68  | 0.62  | 0.68  | 0.62  | 2.46  | -0.89 | 2.07 |
| CDKN3       | 1033   | NM_005192    | 5391 | 0.45  | 0.50  | 0.44  | 0.01  | 0.26  | 0.09  | 0.63  | 0.71  | 0.73  | 1.89  | 0.15  | 2.07 |
| HYFB        | 29072  | NM_014159    | 5392 | 2.75  | -0.46 | 1.55  | 0.69  | 0.16  | 0.18  | 1.47  | -0.38 | 0.98  | 3.85  | 1.03  | 2.07 |
| MRP2        | 23390  | NM_015136    | 5393 | 0.68  | 1.24  | 0.52  | -0.50 | -0.93 | -0.59 | 0.56  | 0.97  | 0.53  | 2.24  | -1.98 | 2.06 |
| MR2         | 10518  | NM_006383    | 5394 | 0.29  | 0.99  | 0.91  | 0.29  | -0.69 | -1.47 | 1.53  | -0.43 | 0.63  | 0.47  | 0.91  | 2.06 |
| TS1G01      | 7251   | NM_006292    | 5395 | 0.28  | 1.73  | 1.03  | 1.29  | 0.97  | -0.32 | -0.43 | 0.91  | 1.59  | 3.04  | 1.94  | 2.06 |
| CPA2        | 13558  | NM_001869    | 5396 | 1.73  | 1.41  | 0.97  | -0.64 | -0.08 | -0.10 | 1.10  | 0.68  | 0.28  | 4.11  | -0.82 | 2.06 |
| APNS2       | 8439   | NM_033230    | 5397 | 0.57  | 1.39  | 1.22  | 0.57  | 1.39  | 1.22  | 0.57  | 1.39  | 1.22  | 3.28  | 1.59  | 2.06 |
| MUC2        | 4583   | NM_002457    | 5398 | 1.41  | 1.13  | 0.22  | 0.60  | -0.50 | -0.51 | 0.01  | 1.13  | 0.92  | 2.77  | 0.41  | 2.06 |
| STGALNA3C   | 256435 | NM_152996    | 5399 | 0.77  | 1.50  | 0.48  | -0.09 | -0.21 | 2.05  | 0.31  | 2.07  | -0.32 | 2.76  | 1.76  | 2.06 |
| CDNF5       | 10486  | NM_005491    | 5400 | -0.24 | -0.65 | -0.93 | -0.47 | -0.45 | -0.94 | 0.58  | -0.41 | 0.68  | -0.58 | -0.73 | 2.06 |
| PLAZGA      | 5321   | NM_024420    | 5401 | 0.97  | 0.10  | -0.15 | -0.82 | -0.63 | -0.33 | 1.41  | 0.57  | 0.88  | 0.92  | -1.79 | 2.06 |
| CSORF41     | 138199 | NM_152420    | 5402 | -1.05 | -1.18 | 0.41  | -1.26 | -0.41 | -0.56 | 1.15  | 0.06  | 0.85  | 0.07  | -2.23 | 2.06 |
| AB2         | 10152  | NM_005759    | 5403 | 0.02  | 0.80  | 0.45  | -0.67 | -0.68 | -0.77 | 0.28  | 0.96  | 0.82  | 1.05  | -1.13 | 2.06 |
| PRF5B       | 551    | NM_001410    | 5404 | 0.92  | 0.42  | 0.55  | 0.36  | 0.41  | 0.55  | 0.43  | 0.41  | 0.43  | 2.38  | 0.28  | 2.06 |
| NRP2        | 83714  | NM_031474    | 5405 | 0.46  | 0.66  | 2.17  | -0.24 | -0.29 | -0.13 | 0.17  | 0.58  | 1.31  | 3.01  | -0.67 | 2.06 |
| SPC33       | 60559  | NM_021028    | 5406 | -0.04 | -0.29 | -0.32 | -0.71 | -0.66 | -0.73 | 0.23  | 0.87  | 0.67  | -0.65 | -2.10 | 2.06 |
| SNR2        | 5446   | NM_000203    | 5407 | 1.04  | 0.44  | 1.61  | 1.04  | 0.48  | 1.14  | 1.04  | 0.48  | 1.14  | 1.48  | -1.10 | 2.06 |
| MFAP2       | 4237   | NM_002403    | 5408 | 0.69  | 1.50  | 1.18  | 1.12  | 0.19  | 0.82  | 0.23  | 1.33  | 0.50  | 3.37  | 2.13  | 2.06 |
| TMOD4       | 29765  | NM_013353    | 5409 | -0.72 | -0.49 | -0.86 | -1.47 | -1.63 | -1.34 | 0.05  | 1.94  | 0.06  | -2.07 | -4.43 | 2.05 |
| LOC121842   | 8356   | NM_021842    | 5410 | -0.41 | 0.70  | 0.00  | -0.41 | 0.70  | 0.00  | 0.41  | 0.70  | 0.00  | 1.73  | -1.68 | 2.05 |
| HS2796      | 55552  | NM_00100493  | 5411 | 0.28  | 1.83  | 2.40  | 1.29  | 0.73  | 0.74  | -0.53 | 1.04  | 1.54  | 4.61  | 2.77  | 2.05 |
| TRB18       | 9096   | NM_046819    | 5412 | 1.68  | 1.50  | 1.63  | 0.88  | 0.42  | 0.31  | 1.39  | 0.64  | 1.02  | 4.81  | 1.61  | 2.05 |
| DCD         | 16335  | NM_001921    | 5413 | 2.22  | 1.16  | -0.20 | 1.75  | 2.85  | 0.52  | 0.52  | 0.54  | 0.36  | 3.17  | 5.12  | 2.05 |
| PCBP1       | 63970  | NM_022132    | 5414 | 0.73  | 1.23  | 1.07  | 0.73  | 1.23  | 1.07  | 0.73  | 1.23  | 1.07  | 3.03  | 0.69  | 2.05 |
| PALM2       | 114289 | NM_00107293  | 5415 | 0.69  | -0.35 | 0.92  | -0.32 | -0.04 | 0.07  | 0.86  | 0.16  | 1.03  | 1.25  | -0.29 | 2.05 |
| STAU        | 6780   | NM_017454    | 5416 | -1.16 | 0.45  | 3.06  | 0.97  | 0.46  | 1.51  | -1.08 | 2.14  | 0.99  | 2.35  | 2.94  | 2.05 |
| NHMB        | 1160   | NM_001371    | 5417 | 0.29  | 0.36  | 1.69  | 0.62  | 0.28  | 0.62  | 1.17  | 0.62  | 0.62  | 0.76  | 0.76  | 2.05 |
| C2ORF5      | 25829  | NM_012364    | 5418 | -0.22 | -0.56 | -0.04 | -0.90 | -1.83 | -1.27 | -0.13 | 0.83  | 1.35  | -0.81 | -4.00 | 2.05 |
| ENDOG       | 2021   | NM_004435    | 5419 | 0.04  | 0.64  |       |       |       |       |       |       |       |       |       |      |

|             |        |              |      |       |       |       |       |       |       |       |       |       |       |       |      |
|-------------|--------|--------------|------|-------|-------|-------|-------|-------|-------|-------|-------|-------|-------|-------|------|
| SECC211     | 9554   | NM_004892    | 5501 | 1.10  | 0.55  | 0.86  | -0.15 | 0.87  | -0.02 | 1.49  | 0.05  | 0.56  | 2.51  | 0.69  | 1.99 |
| THM2        | 7167   | NM_001674    | 5502 | -0.76 | -0.71 | -0.65 | -0.20 | -0.24 | -0.26 | 0.73  | 0.46  | 0.80  | -2.13 | -2.74 | 1.98 |
| MGC3382     | 16288  | NM_173529    | 5503 | 0.47  | 0.08  | -0.20 | -1.53 | -0.40 | -1.02 | 1.22  | 0.24  | 0.52  | -0.99 | -2.95 | 1.99 |
| ORAF17      | 81099  | NM_001005240 | 5504 | 1.21  | 0.24  | 0.13  | -0.61 | -0.46 | -0.90 | 1.24  | 0.16  | 0.58  | 1.58  | -1.96 | 1.99 |
| ACACA       | 31     | NM_198836    | 5505 | -0.18 | -0.16 | -0.56 | -1.51 | -1.39 | -1.04 | 0.80  | 1.04  | 0.15  | -0.90 | -3.94 | 1.99 |
| HUA-HDA     | 31     | NM_198836    | 5506 | 1.32  | 1.29  | 1.40  | 0.02  | 0.02  | 0.40  | 1.57  | 0.60  | 0.42  | 5.12  | 1.22  | 1.99 |
| AASDH       | 132949 | NM_181806    | 5507 | 0.55  | 2.05  | 1.37  | 0.44  | 0.87  | -0.04 | 0.08  | 1.13  | 0.78  | 3.97  | 1.27  | 1.99 |
| PCT11A      | 5130   | NM_005017    | 5508 | -0.06 | -0.42 | 0.60  | 0.44  | -1.12 | -0.93 | -0.15 | 0.35  | 1.78  | 0.12  | -1.61 | 1.99 |
| SA          | 6491   | NM_005025    | 5509 | 0.10  | 0.18  | 0.36  | 0.07  | -0.09 | -0.27 | 0.08  | 0.23  | 0.80  | 1.65  | 0.14  | 1.99 |
| NNT         | 28330  | NM_182977    | 5510 | 0.39  | 0.90  | 0.44  | 0.23  | -0.40 | -0.20 | 0.31  | 1.46  | 0.22  | 1.73  | -0.46 | 1.99 |
| ICF2        | 1894   | NM_018098    | 5511 | 1.27  | 0.93  | 1.57  | 0.24  | 0.48  | 0.28  | 0.96  | 0.13  | 0.90  | 3.77  | 0.99  | 1.99 |
| RIAD076     | 2385   | NM_001043    | 5512 | 0.44  | -0.12 | 0.38  | -0.52 | 0.11  | -0.32 | 0.43  | 0.11  | 0.29  | 0.62  | 0.06  | 1.99 |
| YR9         | 25988  | NM_198971    | 5513 | 0.43  | 0.49  | 0.65  | -1.07 | -1.48 | -0.89 | 0.36  | 1.11  | 0.52  | 1.68  | -3.44 | 1.98 |
| MAPK43      | 8491   | NM_003618    | 5514 | 0.82  | 1.10  | 1.56  | 0.00  | 0.58  | 0.03  | 0.41  | 0.22  | 1.35  | 3.48  | 0.61  | 1.98 |
| KP1         | 57108  | NM_020378    | 5515 | 0.05  | 0.73  | 0.20  | -0.64 | -0.12 | -0.18 | 0.72  | 0.60  | 0.66  | 0.88  | -0.95 | 1.98 |
| LEBR4       | 163702 | NM_173905    | 5516 | -0.26 | -0.12 | 0.79  | -0.51 | -0.51 | -0.50 | 0.15  | 0.56  | 1.25  | 0.41  | 1.51  | 1.98 |
| DNASE1L3    | 1776   | NM_004944    | 5517 | -0.89 | -0.03 | 0.27  | -0.38 | -0.46 | -0.83 | -0.22 | 1.09  | 1.12  | -0.65 | -1.67 | 1.98 |
| MGC50372    | 25343  | NM_173966    | 5518 | 0.31  | 0.44  | 1.10  | -0.02 | -0.48 | -0.11 | 0.22  | 0.39  | 1.38  | 1.86  | -0.62 | 1.98 |
| DIF2N348227 | 84223  | NM_00124435  | 5519 | 0.67  | 1.66  | 0.80  | 0.08  | 0.17  | 0.00  | 0.48  | 1.02  | 0.48  | 2.13  | 0.25  | 1.98 |
| C1ORF2      | 10712  | NM_198264    | 5520 | 1.28  | 0.74  | 0.97  | 0.14  | -0.36 | -0.56 | 0.69  | 0.77  | 0.52  | 2.39  | -0.79 | 1.98 |
| JAD1        | 3898   | NM_005558    | 5521 | 0.46  | 0.85  | 1.05  | -0.21 | -0.07 | -0.61 | 0.17  | 0.22  | 1.60  | 2.36  | -0.89 | 1.98 |
| SC1L1       | 57410  | NM_020880    | 5522 | 0.67  | 0.15  | 0.72  | -0.68 | -0.69 | -0.65 | 0.73  | 0.51  | 0.73  | 1.54  | -2.01 | 1.98 |
| THRAP3      | 4967   | NM_005119    | 5523 | 0.26  | 0.17  | 1.24  | -0.18 | -0.58 | -0.45 | 0.05  | 0.82  | 1.11  | 1.68  | -1.21 | 1.98 |
| C1SORF12    | 55272  | NM_018285    | 5524 | -0.60 | -0.73 | 0.87  | -0.13 | -0.64 | -0.78 | -0.16 | 0.76  | 1.38  | -0.45 | -1.55 | 1.98 |
| PK1         | 26515  | NM_012192    | 5525 | 0.30  | 0.92  | 1.14  | -0.88 | -0.23 | 0.34  | 1.08  | 0.59  | 0.31  | 2.36  | -0.56 | 1.98 |
| GM1         | 1132   | NM_00103712  | 5526 | 0.76  | 1.18  | -0.08 | -0.86 | -0.13 | -0.07 | 0.99  | 0.67  | 0.32  | 1.87  | -1.65 | 1.98 |
| SERTAD1     | 29990  | NM_013376    | 5527 | -0.57 | -0.06 | 0.31  | -0.89 | -0.81 | -0.71 | 1.35  | -0.26 | 0.89  | -0.32 | -2.40 | 1.98 |
| CHST1       | 8534   | NM_003654    | 5528 | 0.35  | 0.30  | 1.08  | 0.17  | 0.03  | 0.70  | 0.91  | 0.49  | 0.57  | 1.72  | 0.90  | 1.98 |
| PPP         | 5384   | NM_000652    | 5529 | 1.24  | 1.60  | 1.63  | 0.59  | 1.02  | 0.61  | 0.59  | 1.02  | 0.61  | 3.38  | 0.85  | 1.98 |
| FGG         | 2366   | NM_000509    | 5530 | -0.28 | 0.22  | 0.84  | -0.76 | -0.89 | -0.43 | 0.67  | 0.14  | 1.16  | 0.34  | -2.08 | 1.97 |
| C1ORF137    | 26098  | NM_015068    | 5531 | 0.56  | 0.51  | 0.56  | -0.65 | -0.76 | -0.82 | 0.50  | 0.87  | 0.60  | 1.63  | -2.23 | 1.97 |
| ZNF143      | 7797   | NM_003442    | 5532 | 1.25  | 1.80  | 1.39  | 0.83  | -0.20 | -0.80 | 0.40  | 0.40  | 0.40  | 4.44  | -1.09 | 1.97 |
| AOC2        | 314    | NM_001158    | 5533 | 0.22  | 0.54  | 0.42  | -0.54 | -0.72 | -0.67 | 0.46  | 1.00  | 0.51  | 1.18  | -1.93 | 1.97 |
| WNTE        | 7475   | NM_006522    | 5534 | 2.43  | 0.69  | 1.40  | 0.26  | 0.54  | 0.45  | 1.80  | -0.17 | 0.34  | 4.51  | 1.25  | 1.97 |
| GP158       | 57512  | NM_020752    | 5535 | 1.27  | 1.38  | 1.54  | 0.26  | 0.08  | 0.10  | 0.62  | 0.70  | 0.65  | 4.19  | 0.44  | 1.97 |
| FTCD        | 1084   | NM_206965    | 5536 | 0.03  | 0.40  | 0.33  | -0.40 | -0.64 | -0.42 | 1.06  | 0.84  | 0.42  | 0.72  | 1.64  | 1.97 |
| YKTE        | 10652  | NM_006555    | 5537 | 0.22  | 2.24  | -0.24 | 0.47  | 0.64  | 0.60  | -0.17 | 2.21  | -0.07 | 2.21  | 1.71  | 1.97 |
| ASPH        | 444    | NM_020164    | 5538 | 0.97  | 1.05  | 0.85  | 0.97  | -0.02 | 0.68  | 0.11  | 1.42  | 0.43  | 2.86  | 1.62  | 1.97 |
| MGC48827    | 34879  | NM_020227    | 5539 | 1.62  | 1.27  | 2.29  | 0.41  | -0.26 | 1.49  | 0.62  | 0.62  | 0.81  | 5.19  | -2.71 | 1.97 |
| MYADM       | 91663  | NM_138373    | 5540 | -0.42 | 0.93  | -0.77 | -1.75 | -1.16 | -1.66 | 1.35  | -1.18 | 0.80  | -2.13 | -4.57 | 1.97 |
| FL2295      | 80117  | NM_025047    | 5541 | 0.38  | 0.65  | 0.41  | -0.03 | -0.87 | 0.31  | 0.29  | 1.59  | 0.09  | 1.45  | -0.59 | 1.97 |
| FL2295S     | 6382   | NM_025047    | 5542 | 2.82  | 3.15  | 2.94  | 2.78  | 1.88  | 1.24  | 2.80  | 1.88  | 1.24  | 8.91  | 6.41  | 1.97 |
| KCNJ2       | 3781   | NM_170775    | 5543 | 0.77  | 0.95  | 1.28  | 0.06  | 0.53  | 0.41  | 0.23  | 1.22  | 0.52  | 5.00  | 1.00  | 1.97 |
| FLJ3748     | 134265 | NM_152406    | 5544 | 0.14  | 1.24  | 2.28  | 0.24  | 1.00  | -0.45 | -0.21 | -0.11 | 2.28  | 3.66  | 0.80  | 1.97 |
| COCS        | 10456  | NM_181733    | 5545 | 0.31  | -0.23 | -0.18 | -0.30 | -0.88 | -0.67 | 0.78  | 0.41  | 0.78  | -0.10 | -1.85 | 1.97 |
| TYTE        | 7179   | NM_199261    | 5546 | 2.34  | 2.15  | 1.17  | 1.78  | 1.07  | 1.78  | 1.07  | 1.78  | 1.07  | 5.47  | 3.24  | 1.97 |
| PVCS        | 5832   | NM_001017423 | 5547 | 0.26  | -1.17 | -1.40 | -1.93 | -1.19 | -1.77 | 3.33  | -0.68 | -0.68 | -2.31 | -4.89 | 1.97 |
| AMXAR       | 8416   | NM_003568    | 5548 | 0.83  | -0.07 | -0.65 | -0.40 | -0.83 | -0.49 | 0.40  | 2.03  | -0.46 | 0.11  | -1.72 | 1.97 |
| PNFG        | 5986   | NM_020917    | 5549 | 1.45  | 1.26  | 1.46  | 0.45  | 0.26  | 0.44  | 0.45  | 0.26  | 0.44  | 4.05  | 0.41  | 1.97 |
| PCK2        | 5128   | NM_002995    | 5550 | 1.28  | 1.70  | 0.75  | 0.67  | 0.29  | 0.00  | 0.44  | 0.86  | 0.67  | 3.73  | 0.97  | 1.97 |
| CORF16      | 28513  | NM_001130029 | 5551 | -0.18 | 0.00  | -0.45 | -1.55 | -1.12 | -1.54 | 0.51  | 0.68  | 0.78  | -0.62 | -4.21 | 1.97 |
| NIT1        | 2947   | NM_004348    | 5552 | -0.40 | -0.62 | -0.64 | -0.70 | -1.65 | -0.23 | -0.70 | -1.65 | -0.23 | -1.81 | -2.67 | 1.96 |
| RBBR8       | 5932   | NM_203292    | 5553 | 0.74  | 1.23  | 2.31  | -0.14 | 0.90  | 0.66  | 0.53  | 0.86  | 0.57  | 4.28  | 1.42  | 1.96 |
| URE1L       | 7318   | NM_003335    | 5554 | 0.97  | 0.17  | 0.07  | -0.55 | -0.12 | -0.43 | 1.92  | -0.28 | 0.32  | 0.87  | -1.11 | 1.96 |
| SIA         | 6593   | NM_006748    | 5555 | 1.41  | 1.59  | 2.50  | -1.22 | 1.65  | 0.67  | 0.48  | 0.35  | 1.14  | 5.00  | 1.10  | 1.96 |
| KAC2        | 11732  | NM_080791    | 5556 | -0.20 | 0.33  | 0.14  | -0.24 | -0.39 | -0.11 | 0.17  | 0.83  | 0.99  | 0.20  | 0.44  | 1.96 |
| OR4K14      | 122740 | NM_00104712  | 5557 | 0.86  | 0.82  | 0.49  | -0.04 | 0.09  | -0.22 | 1.00  | 0.19  | 0.57  | 2.10  | -0.17 | 1.96 |
| H21         | 59670  | NM_021803    | 5558 | 1.10  | 1.50  | 1.77  | 1.23  | 1.04  | 0.79  | 0.50  | 0.44  | 1.02  | 4.36  | 3.06  | 1.96 |
| ZNF284      | 34290  | NM_0137813   | 5559 | 1.78  | 1.47  | 1.83  | 1.04  | 0.80  | 0.70  | 1.54  | 0.62  | 1.24  | 4.08  | 1.24  | 1.96 |
| UNC119      | 9094   | NM_005148    | 5560 | 1.45  | 0.50  | 0.65  | 0.19  | -0.39 | -0.58 | 0.43  | 0.51  | 1.01  | 2.60  | -0.79 | 1.96 |
| BAG5        | 85316  | NM_182484    | 5561 | 0.83  | 1.49  | 1.74  | 1.12  | 0.61  | 1.32  | 0.67  | 0.68  | 0.61  | 4.06  | 3.05  | 1.96 |
| PCBP        | 9597   | NM_004288    | 5562 | 2.33  | 0.50  | 0.60  | 1.24  | 0.40  | 1.44  | 2.30  | 0.60  | 0.86  | 2.77  | 0.88  | 1.96 |
| C14ORF150   | 112840 | NM_080666    | 5563 | 1.45  | 0.67  | 0.66  | -0.49 | -0.11 | -0.57 | 1.08  | 0.12  | 0.75  | 2.79  | -1.17 | 1.96 |
| TA-LRP      | 23507  | NM_015150    | 5564 | 1.50  | 0.71  | 0.61  | 1.02  | -0.20 | 0.97  | 1.08  | 0.89  | 0.01  | 2.83  | 1.80  | 1.96 |
| PNLIPFP2    | 5408   | NM_005396    | 5565 | 0.58  | 0.55  | 0.19  | -0.74 | 0.49  | -0.83 | 1.05  | -0.09 | 1.00  | 1.33  | -1.05 | 1.96 |
| MGC29666    | 72862  | NM_00180851  | 5566 | 0.53  | 0.94  | 1.52  | 0.14  | 0.19  | -0.05 | 0.84  | 0.19  | -0.05 | 1.09  | 0.49  | 1.96 |
| DOXSL       | 220164 | NM_152721    | 5567 | 2.03  | 1.19  | 0.55  | 0.70  | -0.22 | -0.13 | 0.64  | 0.60  | 0.72  | 3.76  | 0.35  | 1.96 |
| ELAC2       | 60528  | NM_018127    | 5568 | 0.89  | 0.83  | 0.19  | 0.41  | 0.33  | 1.56  | 0.38  | 1.04  | 0.55  | 1.91  | 2.30  | 1.96 |
| PRM1        | 5656   | NM_002761    | 5569 | 0.20  | 0.22  | 0.34  | -0.11 | 0.62  | 0.12  | 0.16  | 0.22  | 0.34  | 0.95  | 0.37  | 1.96 |
| RMF5        | 6048   | NM_006913    | 5570 | 0.04  | 0.12  | 1.23  | -0.55 | -0.53 | -0.02 | 0.76  | -0.16 | 1.36  | 1.39  | -1.11 | 1.96 |
| FUR1        | 23769  | NM_013280    | 5571 | 0.56  | -0.45 | -0.31 | -1.06 | -1.54 | -1.23 | 1.06  | 0.73  | 0.16  | -0.21 | -3.83 | 1.96 |
| GLY1L1      | 34607  | NM_003283    | 5572 | 0.89  | 0.35  | 0.50  | -0.07 | 0.44  | -0.07 | 0.44  | -0.07 | 0.44  | 1.73  | -0.70 | 1.96 |
| EPH4A       | 2943   | NM_004438    | 5573 | 2.08  | 1.87  | 2.46  | 1.78  | 2.18  | 1.87  | 0.79  | 0.13  | 1.04  | 5.26  | 5.83  | 1.96 |
| PYGM        | 5837   | NM_005609    | 5574 | 4.35  | 4.15  | -0.28 | 1.67  | 1.42  | 0.41  | 0.89  | 1.82  | -0.75 | 8.21  | 3.49  | 1.96 |
| FLJ2811     | 54470  | NM_00199584  | 5575 | 0.91  | 1.86  | 1.23  | 0.52  | 1.57  | 0.90  | 1.70  | 0.26  | 0.00  | 4.01  | 2.98  | 1.96 |
| MRPH        | 5690   | NM_019116    | 5576 | 1.86  | 0.83  | 0.81  | 0.81  | 0.88  | 0.27  | 0.51  | 0.51  | 0.51  | 5.51  | 1.40  | 1.95 |
| DNOC2       | 1781   | NM_001378    | 5577 | -1.05 | -0.70 | -1.13 | -1.67 | -0.65 | -1.09 | 0.35  | 0.94  | 0.66  | -2.88 | -3.40 | 1.95 |
| HST1H2AA    | 221613 | NM_170745    | 5578 | -0.42 | 0.06  | -0.02 | -0.54 | -0.62 | 0.28  | 0.40  | 1.53  | 0.02  | -0.39 | -0.90 | 1.95 |
| IGSF10      | 8446   | NM_002446    | 5579 | 0.59  | 1.23  | 1.60  | 0.09  | 0.52  | 0.60  | 0.55  | 1.09  | 0.65  | 2.42  | 0.79  | 1.95 |
| PGL         | 9487   | NM_004278    | 5580 | 1.53  | 1.32  | 0.78  | 0.40  | 1.08  | 0.23  | 1.45  | 0.04  | 0.46  | 3.62  | 1.26  | 1.95 |
| LGC6901     | 56901  | NM_020142    | 5581 | 1.39  | -0.31 | 1.18  | 0.25  | 1.08  | 0.79  |       |       |       |       |       |      |

|           |        |              |      |       |        |       |       |       |       |       |       |       |       |       |      |
|-----------|--------|--------------|------|-------|--------|-------|-------|-------|-------|-------|-------|-------|-------|-------|------|
| KCD11     | 284252 | NM_198991    | 5663 | -0.53 | 0.24   | -0.41 | -0.27 | -1.04 | -0.69 | 0.06  | 1.45  | 0.39  | -0.70 | -2.00 | 1.90 |
| BSF       | 3385   | NM_004867    | 5664 | -0.08 | 0.69   | 0.02  | -0.04 | -1.02 | 1.02  | 1.52  | 0.88  | 0.26  | 0.26  | 0.66  | 1.60 |
| PKRARB2   | 15377  | NM_002736    | 5665 | 0.97  | -0.49  | 0.56  | 0.01  | 1.10  | 0.74  | 2.39  | -0.39 | -0.10 | 1.04  | 1.84  | 1.90 |
| CTSB      | 1508   | NM_001908    | 5666 | 1.78  | 0.39   | 0.72  | 0.05  | 0.14  | 0.28  | 1.56  | 0.20  | 0.15  | 2.89  | 0.47  | 1.90 |
| DCR1C1C   | 64421  | NM_022487    | 5667 | 0.93  | 0.52   | 0.84  | -0.06 | 0.08  | 0.71  | 1.19  | 0.34  | 0.37  | 2.29  | 0.73  | 1.90 |
| SACRT7    | 325170 | NM_148886    | 5668 | 0.43  | -1.37  | 0.21  | 0.17  | -0.18 | 0.21  | 0.81  | 0.79  | 0.31  | 2.01  | 0.36  | 1.90 |
| CALCR1    | 10203  | NM_005795    | 5669 | 3.00  | 1.40   | 0.92  | 0.06  | 0.21  | 0.17  | 1.00  | 0.41  | 0.49  | 5.32  | 0.44  | 1.90 |
| TS2C      | 7249   | NM_021056    | 5670 | 2.34  | 1.98   | 0.23  | 0.84  | 1.16  | 1.87  | 1.55  | 0.71  | -0.36 | 4.55  | 3.87  | 1.90 |
| MTF31     | 21840  | NM_017912    | 5671 | 1.26  | 0.41   | 0.86  | 0.17  | 0.32  | 0.19  | 0.82  | 0.19  | 0.22  | 2.52  | 0.76  | 1.90 |
| CKAP5     | 9793   | NM_014756    | 5672 | 0.50  | -0.56  | -1.11 | -0.93 | -0.74 | -1.28 | 0.92  | 0.51  | 0.46  | -1.16 | -1.11 | 1.90 |
| NALP11    | 204801 | NM_145007    | 5673 | -0.83 | -0.10  | -1.01 | -1.17 | -0.47 | -0.88 | 0.37  | 0.90  | 0.62  | 1.94  | -2.52 | 1.89 |
| EPDI      | 2461   | NM_004483    | 5674 | -0.83 | -0.45  | 1.13  | -0.65 | -0.25 | 0.42  | 0.67  | 0.55  | 0.62  | 1.01  | -0.62 | 1.89 |
| EPF5      | 2958   | NM_004446    | 5675 | 0.74  | -0.88  | -1.81 | -2.53 | -1.22 | -2.41 | 1.98  | 0.25  | -0.34 | -3.44 | -6.16 | 1.89 |
| OR11H4    | 390442 | NM_001004479 | 5676 | 0.27  | 0.68   | 0.76  | -0.57 | -0.49 | -0.34 | 0.34  | 0.54  | 1.02  | 1.71  | -1.40 | 1.89 |
| CPB1      | 1360   | NM_001871    | 5677 | 0.74  | 1.12   | -0.03 | 0.34  | -0.63 | 0.87  | -0.05 | 2.34  | -0.40 | 1.83  | 0.58  | 1.89 |
| HSR2      | 140807 | NM_080747    | 5678 | -0.40 | 0.75   | -0.51 | -1.41 | -1.75 | -1.49 | 0.62  | 0.31  | 0.97  | 1.66  | -0.65 | 1.89 |
| LOC90799  | 90799  | NM_138363    | 5679 | 0.61  | 0.12   | -0.39 | -0.72 | -0.36 | -0.74 | 1.46  | 0.23  | 0.20  | 0.33  | -1.82 | 1.89 |
| IPAL2     | 80350  | NM_145727    | 5680 | 0.27  | -0.23  | -2.79 | -1.40 | -0.91 | -4.72 | 0.67  | 0.34  | 0.88  | -2.75 | -7.03 | 1.89 |
| PCN21     | 54542  | NM_018835    | 5681 | 1.18  | 1.04   | 1.11  | -0.22 | -0.29 | -0.06 | 0.48  | 0.58  | 0.83  | 3.33  | 0.57  | 1.89 |
| UGT217    | 7367   | NM_001077    | 5682 | 0.88  | -0.09  | 0.32  | -0.42 | -0.52 | -1.14 | 0.64  | 0.35  | 0.90  | 1.12  | -2.08 | 1.89 |
| CAPN11    | 11131  | NM_007058    | 5683 | 0.28  | 0.45   | 0.70  | -0.53 | -1.07 | -0.23 | 0.25  | 1.00  | 0.63  | 1.43  | -1.83 | 1.89 |
| DISP9     | 1852   | NM_001395    | 5684 | 0.74  | 0.15   | 0.22  | 0.16  | 0.02  | -0.93 | 0.39  | 0.00  | 1.50  | 1.11  | -0.76 | 1.89 |
| TAAR5     | 8938   | NM_003967    | 5685 | -0.75 | 0.08   | -0.72 | -1.02 | -1.13 | -1.28 | 0.04  | 1.08  | 0.77  | -1.39 | -3.44 | 1.89 |
| TXND2C    | 84203  | NM_032243    | 5686 | 1.49  | 2.03   | 0.56  | 0.14  | 0.66  | 0.71  | 0.87  | 1.06  | -0.05 | 4.08  | 1.51  | 1.89 |
| FZD1      | 8321   | NM_003505    | 5687 | 0.40  | 0.29   | 0.57  | -0.23 | -0.28 | -0.03 | 0.70  | 0.37  | 0.82  | 1.26  | -0.54 | 1.89 |
| MARCO     | 8085   | NM_000770    | 5688 | 1.75  | 1.06   | 2.13  | 0.43  | 0.74  | 0.54  | -0.03 | 0.63  | 1.28  | 4.95  | 1.71  | 1.89 |
| OR5K2     | 402135 | NM_001004737 | 5689 | 0.32  | 0.16   | 0.87  | 0.01  | -0.05 | 0.21  | 0.67  | 0.90  | 0.32  | 1.34  | 0.17  | 1.88 |
| KONK13    | 56659  | NM_022054    | 5690 | -0.32 | -0.90  | -0.29 | -0.80 | -1.18 | -1.20 | 1.02  | -0.13 | 1.00  | -0.87 | -3.24 | 1.88 |
| PHJ       | 5719   | NM_001655    | 5691 | 1.23  | 1.45   | 1.04  | 0.15  | 0.27  | 0.45  | 0.86  | 0.29  | 0.82  | 3.72  | 0.70  | 1.88 |
| ORS225    | 255725 | NM_00104062  | 5692 | 0.72  | 0.21   | -0.17 | -0.87 | -1.03 | -0.93 | -0.39 | 1.07  | 1.20  | -0.68 | -2.83 | 1.88 |
| C10DRF4   | 118924 | NM_145246    | 5693 | 0.99  | 1.18   | -0.07 | 0.02  | -0.27 | -0.32 | 1.00  | 0.89  | 0.00  | 2.11  | -0.56 | 1.88 |
| IFISA     | 319    | NM_001884    | 5694 | 0.80  | -0.08  | 0.64  | -0.78 | -0.23 | 0.87  | 0.40  | 0.68  | 0.61  | 1.45  | -1.05 | 1.88 |
| POMC      | 5443   | NM_000939    | 5695 | 1.47  | 0.09   | 0.32  | -0.09 | -0.66 | 0.70  | 1.43  | 0.36  | 0.09  | 1.88  | 0.05  | 1.88 |
| CDH19     | 28513  | NM_021153    | 5696 | 1.80  | -0.14  | -0.32 | -0.56 | 0.05  | 0.00  | 0.88  | 0.06  | 0.94  | 1.34  | 0.08  | 1.88 |
| SYT13     | 57598  | NM_020826    | 5699 | 1.19  | 0.30   | 0.38  | -0.44 | -0.26 | 0.45  | 1.29  | 0.73  | -0.14 | 1.87  | -0.25 | 1.88 |
| DBP1      | 12983  | NM_020945    | 5698 | 0.26  | 0.44   | 0.74  | 0.68  | 0.16  | 0.42  | 0.64  | 0.24  | 0.84  | 4.44  | 0.09  | 1.88 |
| IFNA4     | 3441   | NM_021068    | 5699 | 0.90  | 1.49   | 0.51  | -0.42 | 0.34  | 0.47  | 0.38  | 1.32  | 0.18  | 2.89  | 1.23  | 1.88 |
| DPF5      | 1807   | NM_001385    | 5690 | 0.05  | 0.47   | 0.93  | -0.48 | -0.94 | 0.07  | 0.07  | 0.91  | 0.90  | 1.45  | -1.34 | 1.88 |
| IFITM51   | 4319   | NM_005026    | 5691 | 0.76  | 1.49   | 0.96  | 0.16  | 0.12  | 0.49  | 0.74  | 1.19  | 0.48  | 2.21  | 1.18  | 1.88 |
| OR2A2     | 442361 | NM_001005480 | 5702 | 0.84  | 1.15   | 0.81  | -0.07 | 0.58  | 0.04  | 0.71  | 0.38  | 0.79  | 2.80  | 0.55  | 1.88 |
| SPTA1     | 6708   | NM_003126    | 5703 | 3.03  | 3.74   | 3.00  | 1.00  | 1.41  | 1.64  | 0.70  | 0.75  | 0.44  | 9.78  | 4.05  | 1.88 |
| MT1       | 5145   | NM_01032891  | 5704 | 1.39  | 0.31   | 0.89  | 0.74  | 0.17  | 0.81  | 1.08  | 0.18  | 2.50  | 2.62  | 2.62  | 1.88 |
| TMD1D     | 23423  | NM_007364    | 5705 | -0.71 | -1.26  | -1.24 | -2.24 | -1.81 | -1.60 | 1.35  | -0.09 | 0.63  | -3.21 | -6.65 | 1.88 |
| GREP11    | 80273  | NM_025196    | 5706 | 0.09  | 1.09   | 2.17  | 1.91  | 0.36  | 0.44  | -0.73 | -0.04 | 2.65  | 3.34  | 2.71  | 1.88 |
| GT1FC3    | 9330   | NM_012886    | 5707 | 1.61  | 1.92   | 1.35  | 0.08  | 0.74  | -0.18 | 0.63  | 0.40  | 0.85  | 4.87  | 0.65  | 1.88 |
| R4P28     | 5912   | NM_002886    | 5708 | 0.55  | 1.07   | 0.81  | 0.02  | 1.43  | 0.07  | 0.62  | 1.43  | 0.17  | 1.44  | 1.03  | 1.88 |
| DFPZ64102 | 25854  | NM_001006655 | 5709 | 1.14  | 0.06   | -0.11 | -0.32 | 0.13  | -0.03 | 1.29  | 0.17  | 0.41  | 1.20  | -0.22 | 1.87 |
| CNN2      | 1265   | NM_021277    | 5710 | -0.60 | -0.64  | -0.62 | -1.35 | -1.15 | -1.17 | 1.06  | 0.07  | 0.75  | -1.86 | -3.66 | 1.87 |
| MT1       | 8520   | NM_01032885  | 5711 | 1.77  | 1.85   | 2.66  | -0.48 | -0.06 | 0.46  | 0.81  | 0.18  | 0.99  | 3.88  | 0.63  | 1.87 |
| IL18      | 3553   | NM_000576    | 5712 | 0.17  | 0.31   | -0.15 | -0.72 | -0.32 | -0.72 | 0.96  | 0.49  | 0.43  | 0.33  | -1.76 | 1.87 |
| ZPRP2     | 124626 | NM_198844    | 5713 | 0.85  | 0.68   | 0.05  | -0.40 | 0.45  | 0.08  | 1.21  | 0.19  | 0.47  | 1.59  | 0.10  | 1.87 |
| INCA1     | 319    | NM_01032892  | 5714 | 0.04  | 0.28   | 0.00  | -0.74 | -0.32 | -0.72 | 0.04  | 0.42  | 0.32  | 0.34  | -0.89 | 1.87 |
| CGORF37   | 55603  | NM_017633    | 5715 | 0.72  | 1.56   | 1.01  | -0.12 | -0.29 | -0.18 | 0.33  | 0.77  | 0.77  | 3.29  | -0.58 | 1.87 |
| M1P7      | 54360  | NM_018659    | 5716 | 0.88  | 1.50   | 2.17  | 0.95  | 1.20  | 1.04  | 0.39  | 0.27  | 1.20  | 4.55  | 3.18  | 1.87 |
| CNN2      | 4313   | NM_004530    | 5717 | -0.36 | -0.81  | -0.57 | -1.10 | -2.20 | -1.38 | 0.28  | 0.80  | 0.79  | -1.74 | -4.67 | 1.87 |
| OR5L1     | 54869  | NM_130024    | 5718 | 1.67  | 0.34   | 0.00  | -0.22 | -0.21 | 0.86  | 0.46  | 0.45  | 0.61  | 2.01  | 0.40  | 1.87 |
| WRD35     | 57539  | NM_007749    | 5719 | -0.20 | -0.13  | 0.01  | -0.70 | -0.50 | -0.82 | 0.58  | 0.10  | 1.19  | -0.32 | -2.02 | 1.87 |
| SM77      | 30815  | NM_013443    | 5720 | -0.36 | -0.06  | -0.82 | -0.65 | -0.40 | -0.53 | 0.39  | 1.36  | 0.12  | -1.24 | -1.58 | 1.87 |
| AG1       | 5685   | NM_010509    | 5721 | 0.82  | 0.16   | 0.44  | -0.72 | -0.82 | -0.47 | 1.05  | 0.82  | 0.17  | 0.11  | -2.13 | 1.87 |
| AKR1CL1   | 340811 | NM_001007536 | 5722 | 0.26  | 0.87   | 0.94  | 0.13  | -0.25 | -0.37 | 0.00  | 0.96  | 0.90  | 2.06  | -0.50 | 1.87 |
| MGC20533  | 93323  | NM_00101699  | 5723 | -0.24 | 0.65   | 0.80  | 0.49  | 0.35  | -0.68 | 0.06  | 0.37  | 1.44  | 1.21  | 0.15  | 1.87 |
| OR5C1     | 79782  | NM_020727    | 5724 | 0.18  | -0.24  | -0.40 | -0.67 | -0.68 | -1.89 | -0.19 | 0.17  | -0.59 | -0.67 | -2.68 | 1.87 |
| ADY2      | 108    | NM_020546    | 5725 | 0.53  | -0.22  | -0.81 | -0.79 | -0.97 | -0.82 | 1.13  | 0.67  | 0.63  | -0.50 | -2.58 | 1.86 |
| SEC15L1   | 54536  | NM_001013848 | 5726 | 1.39  | 1.08   | 0.84  | -0.46 | 0.10  | -0.16 | 1.04  | 0.50  | 0.33  | 3.31  | -0.52 | 1.86 |
| GFPM2     | 29899  | NM_012396    | 5727 | 1.61  | 1.78   | 0.52  | 0.18  | -0.04 | 0.29  | 0.84  | 1.09  | -0.07 | 3.91  | 0.43  | 1.86 |
| TM9P      | 7912   | NM_000209    | 5728 | 1.28  | 1.58   | 1.23  | 0.19  | 0.14  | 0.37  | 0.24  | 0.34  | 0.39  | 0.04  | 0.86  | 1.86 |
| PRKCL2    | 5586   | NM_006256    | 5729 | 2.94  | 1.40   | 2.21  | 1.47  | 1.04  | 0.71  | 0.53  | 0.75  | 0.58  | 6.56  | 3.23  | 1.86 |
| CDORF15   | 150590 | NM_144706    | 5730 | 0.87  | 1.32   | 1.02  | 0.06  | 0.00  | 0.25  | 0.22  | 1.37  | 0.27  | 3.21  | 0.31  | 1.86 |
| MNRK2     | 1098   | NM_010486    | 5731 | 1.40  | 1.23   | 1.62  | 0.62  | 1.22  | 0.62  | 0.42  | 0.23  | 0.62  | 2.62  | 0.56  | 1.86 |
| SNAG1     | 112574 | NM_052870    | 5732 | -1.42 | -1.37  | 0.38  | -1.79 | -2.73 | 0.51  | -0.19 | 1.33  | 0.72  | -2.41 | -4.02 | 1.86 |
| DOX9      | 8653   | NM_004660    | 5733 | 0.47  | -0.46  | -1.02 | -0.67 | -0.79 | 0.32  | 1.90  | 0.81  | -0.85 | -1.00 | -1.14 | 1.86 |
| SH3PFD4   | 5585   | NM_004771    | 5734 | 2.03  | 1.63   | 1.05  | 1.74  | -0.15 | 0.64  | 0.65  | 1.86  | 0.43  | 5.31  | 1.65  | 1.86 |
| STATH     | 6779   | NM_00100981  | 5735 | 1.53  | 1.28   | 1.11  | -0.57 | -0.27 | 0.00  | 1.51  | -0.06 | 0.41  | 2.90  | -0.84 | 1.86 |
| ZNF614    | 80110  | NM_025040    | 5736 | 0.31  | 0.47   | -0.34 | -0.16 | -0.36 | 0.00  | 1.22  | 0.80  | -0.17 | 0.44  | -0.52 | 1.86 |
| FBN1      | 84467  | NM_012447    | 5737 | 0.19  | 1.55   | 0.52  | -0.65 | 0.16  | 0.67  | 0.16  | 1.55  | 0.14  | 2.26  | 1.18  | 1.85 |
| CE1A3     | 2940   | NM_000847    | 5738 | 0.25  | 0.09   | 0.30  | -0.62 | -0.62 | 0.47  | 0.23  | 1.53  | 0.46  | 1.99  | 0.85  | 1.85 |
| C10ORF38  | 221061 | NM_001010924 | 5739 | -0.94 | -0.36  | -0.30 | -1.54 | -1.58 | -1.34 | 0.01  | 0.52  | 1.33  | -1.60 | -4.46 | 1.85 |
| CDK5      | 1020   | NM_004935    | 5740 | 1.62  | 2.33   | 0.77  | 0.87  | 0.64  | 0.36  | 0.66  | 0.70  | 0.49  | 4.72  | 1.87  | 1.85 |
| CT        | 718    | NM_003084    | 5741 | 1.02  | 1.40   | 1.40  | 0.12  | 0.40  | 0.49  | 0.62  | 0.49  | 0.62  | 2.82  | 2.82  | 1.85 |
| ALIA1647  | 57613  | NM_020853    | 5742 | 0.97  | 1.03   | 1.04  | 0.77  | 0.37  | 0.80  | 1.43  | 0.06  | 0.36  | 3.04  | 1.94  | 1.85 |
| RAB4A     | 5867   | NM_004578    | 5743 | 0.85  | 1.43</ |       |       |       |       |       |       |       |       |       |      |

|             |        |              |      |       |       |       |       |       |       |       |       |       |       |       |      |
|-------------|--------|--------------|------|-------|-------|-------|-------|-------|-------|-------|-------|-------|-------|-------|------|
| EP5         | 1983   | NM_183004    | 5825 | -0.23 | -0.53 | 0.03  | 0.43  | 0.68  | -1.28 | -0.06 | -0.21 | 2.07  | -0.72 | -0.17 | 1.80 |
| 57BR25      | 5789   | NM_0103021   | 5826 | 0.01  | 0.29  | 0.73  | -0.1  | 0.4   | 0.78  | 0.21  | 0.28  | 0.23  | 1.93  | -0.63 | 1.65 |
| GCORF158    | 167881 | NM_153362    | 5827 | 1.53  | 1.02  | 1.78  | 0.63  | 0.65  | 0.51  | -0.08 | 1.21  | 0.66  | 6.33  | 1.79  | 1.80 |
| C14ORF45    | 80127  | NM_025057    | 5828 | 1.43  | 1.04  | 0.88  | 0.78  | 0.12  | -0.01 | 0.32  | 0.80  | 0.68  | 3.36  | 0.89  | 1.80 |
| LOC129530   | 129530 | NM_174988    | 5829 | -0.67 | 0.09  | -0.12 | -1.56 | -1.28 | -1.02 | 0.17  | 0.69  | 0.93  | -0.70 | -0.86 | 1.79 |
| MACE        | 23417  | NM_011211    | 5830 | 0.45  | 0.45  | 0.66  | 0.63  | 0.56  | -0.76 | 0.43  | 0.56  | 0.62  | 1.56  | 1.84  | 1.79 |
| ALAS2       | 212    | NM_001037969 | 5831 | -0.66 | -0.16 | 0.00  | -0.28 | -0.76 | -0.10 | 2.03  | -0.02 | -0.22 | -0.82 | -1.14 | 1.79 |
| ACOLX       | 55289  | NM_018108    | 5832 | -0.40 | 0.15  | 1.70  | -0.30 | 0.38  | -1.73 | -0.43 | -0.39 | 2.61  | 1.44  | -1.65 | 1.79 |
| PPRP1       | 888    | NM_000018160 | 5833 | 0.83  | 1.90  | 0.45  | 0.71  | 0.80  | 0.42  | 1.70  | 0.87  | 1.01  | 4.07  | 0.74  | 1.79 |
| PAP01       | 55149  | NM_018109    | 5834 | 0.51  | 0.57  | 0.22  | 0.13  | -0.30 | -0.08 | 0.58  | 0.84  | 0.37  | 1.30  | -0.26 | 1.79 |
| PTG51       | 5742   | NM_080091    | 5835 | -0.72 | 0.67  | 0.27  | -0.59 | -1.18 | -0.76 | -0.17 | 1.57  | 0.40  | 0.83  | -2.52 | 1.79 |
| PS68        | 40253  | NM_018107    | 5836 | -0.42 | -0.18 | 0.24  | -1.26 | -1.01 | -0.42 | 0.56  | 0.27  | 0.67  | -0.47 | -0.84 | 1.79 |
| FLH4154     | 196296 | NM_188462    | 5837 | 0.15  | 0.09  | -0.67 | -1.14 | -1.22 | -1.13 | -0.07 | 1.09  | 0.77  | -1.33 | -0.49 | 1.79 |
| DEFB134     | 613211 | NM_001033019 | 5838 | 1.47  | 1.23  | 0.73  | 0.01  | -0.23 | 0.42  | 0.81  | 0.90  | 0.08  | 3.43  | 0.20  | 1.79 |
| LOC253012   | 253012 | NM_001039372 | 5839 | 0.80  | 1.18  | 1.12  | -0.59 | -1.18 | 0.16  | 0.79  | 0.05  | 0.94  | 1.73  | -0.62 | 1.79 |
| PCFN1       | 5201   | NM_000022    | 5840 | 0.34  | 0.97  | 1.25  | 0.19  | 0.63  | 0.20  | 0.22  | 0.79  | 0.77  | 2.56  | 1.02  | 1.78 |
| FLU0773     | 200150 | NM_152666    | 5841 | 0.34  | -0.10 | 0.03  | -0.70 | -0.48 | -1.10 | 0.84  | 0.16  | 0.78  | 0.27  | -2.28 | 1.78 |
| GAPDH       | 2597   | NM_002046    | 5842 | 0.91  | 0.54  | 1.33  | -0.38 | -0.37 | 1.49  | 0.81  | 1.09  | -0.12 | 2.78  | 0.74  | 1.78 |
| ZNF180      | 7732   | NM_021256    | 5843 | 0.09  | 0.22  | -0.10 | -0.38 | -0.77 | -0.35 | 0.46  | 1.18  | 0.14  | 0.21  | 1.90  | 1.78 |
| TBC1D16     | 125058 | NM_019020    | 5844 | 1.38  | 1.23  | 0.10  | -0.45 | 0.88  | -0.08 | 0.56  | 0.30  | 0.92  | 2.70  | 0.36  | 1.78 |
| TCF11       | 6954   | NM_001093728 | 5845 | -0.66 | -0.10 | 0.16  | -0.39 | -0.77 | -0.07 | 0.03  | 0.91  | 0.84  | -0.60 | -1.23 | 1.78 |
| GAI         | 51883  | NM_015973    | 5846 | -0.19 | -0.46 | 1.08  | -0.74 | 0.21  | -0.56 | 0.57  | -0.18 | 1.38  | 0.44  | -1.09 | 1.78 |
| MGC23985    | 389336 | NM_206966    | 5847 | 2.70  | 1.93  | 1.25  | 0.90  | 1.05  | 1.20  | 1.07  | 0.64  | 0.07  | 5.88  | 3.16  | 1.78 |
| FCN2        | 2220   | NM_015837    | 5848 | 0.31  | 0.50  | 0.55  | -0.24 | -0.57 | -0.45 | 0.60  | 0.73  | 0.45  | 1.35  | -1.26 | 1.78 |
| SNRFBT2     | 57713  | NM_001028880 | 5849 | 0.56  | 0.04  | -0.62 | -0.31 | -0.36 | -0.13 | 1.65  | 0.18  | -0.05 | -0.01 | -0.83 | 1.78 |
| SNRFBT10A   | 80036  | NM_002016    | 5850 | -0.38 | 0.41  | -0.12 | -0.99 | -0.93 | -0.72 | 0.55  | 0.55  | 0.69  | -0.91 | -0.63 | 1.78 |
| LOX2        | 4017   | NM_002018    | 5851 | -0.10 | 0.28  | 0.82  | -0.44 | -0.44 | -0.58 | 0.21  | 0.52  | 1.04  | 1.01  | -1.46 | 1.78 |
| DKFZP76C241 | 399010 | NM_178642    | 5852 | 1.19  | 0.82  | 2.73  | 0.46  | 1.41  | -0.10 | 0.42  | -0.41 | 1.77  | 4.73  | 1.77  | 1.78 |
| HUT111      | 55156  | NM_0010159   | 5853 | 0.26  | 0.02  | 0.28  | 0.82  | 0.02  | 0.27  | 0.61  | 0.42  | 0.27  | 0.52  | 0.63  | 1.78 |
| HDDB853     | 105656 | NM_006558    | 5854 | -0.02 | -0.08 | 0.41  | -0.67 | -0.95 | -0.92 | 0.65  | 0.40  | 0.72  | 0.32  | -2.54 | 1.78 |
| FEV         | 54738  | NM_017521    | 5855 | 1.49  | 1.05  | 0.40  | -0.76 | 0.12  | -0.46 | 0.97  | 0.38  | 0.43  | 2.94  | -1.10 | 1.78 |
| LOC1        | 6598   | NM_025025    | 5856 | 0.47  | 0.61  | 0.34  | 0.21  | -0.48 | 0.01  | 0.87  | 0.26  | 0.27  | 1.42  | -0.37 | 1.78 |
| AKT2        | 208    | NM_001626    | 5857 | 0.90  | 0.45  | 0.52  | -0.09 | 0.29  | 0.23  | 1.09  | 0.25  | 0.43  | 1.86  | 0.43  | 1.78 |
| FLU5744     | 388531 | NM_207391    | 5858 | -0.27 | 1.34  | 0.78  | 0.72  | 1.05  | 0.20  | -0.29 | 0.79  | 1.27  | 1.85  | 1.97  | 1.77 |
| SPANK-N5    | 49457  | NM_001069616 | 5859 | 1.26  | 0.95  | 0.52  | -0.01 | 0.71  | 0.87  | 1.39  | 0.43  | -0.05 | 2.34  | 1.56  | 1.77 |
| PCNKB19     | 1027   | NM_004054    | 5860 | 1.34  | 1.39  | 1.17  | 0.60  | 0.36  | 0.00  | 0.38  | 0.00  | 0.62  | 1.90  | 0.85  | 1.77 |
| FLU4773     | 6695   | NM_004498    | 5861 | 0.55  | -0.11 | 0.09  | -0.42 | -0.90 | -0.46 | 0.89  | 0.27  | 0.62  | 0.53  | -1.79 | 1.77 |
| GCORF159    | 134701 | NM_001009994 | 5862 | 1.30  | 1.72  | 0.08  | 0.82  | -0.09 | -0.41 | -0.08 | 1.53  | 0.32  | 3.10  | 0.33  | 1.77 |
| SPOCK       | 90783  | NM_0010280   | 5863 | 1.26  | 0.09  | 0.53  | -0.47 | -0.27 | 0.14  | 0.47  | 0.12  | 0.43  | 2.88  | 0.50  | 1.77 |
| CC113       | 1266   | NM_001839    | 5864 | -1.21 | -0.13 | 0.72  | 0.22  | 0.64  | -0.10 | 1.57  | -0.37 | 0.58  | 1.80  | 0.76  | 1.77 |
| OBPL5       | 114879 | NM_145838    | 5865 | 0.53  | 0.17  | -0.09 | -0.68 | -0.80 | -1.56 | -0.41 | 0.66  | 1.52  | -0.46 | -3.05 | 1.77 |
| LOC243939   | 1060   | NM_0010440   | 5866 | -0.42 | -0.22 | -0.77 | -0.82 | -0.22 | -0.17 | 0.22  | 1.42  | 0.27  | -1.41 | -0.70 | 1.77 |
| TCERG1L     | 256336 | NM_174937    | 5867 | 1.98  | 1.25  | 1.52  | 0.87  | 1.46  | 1.54  | 1.86  | 0.12  | 0.02  | 4.75  | 1.87  | 1.77 |
| CCDC152     | 16408  | NM_001134848 | 5868 | -0.18 | 0.10  | -0.32 | -0.97 | -0.97 | -0.80 | 0.60  | 0.84  | 0.33  | -0.40 | -2.74 | 1.77 |
| MGC45386    | 374659 | NM_198527    | 5869 | -1.87 | -1.72 | -1.36 | -2.52 | -2.06 | -1.69 | 0.22  | 0.08  | 1.46  | -4.95 | -6.26 | 1.77 |
| LOC25700    | 1095   | NM_002720    | 5870 | 0.60  | 0.48  | 0.87  | 0.43  | 0.45  | 1.24  | 0.45  | 1.44  | 0.45  | 3.65  | 2.79  | 1.77 |
| FLU13614    | 84142  | NM_139076    | 5871 | 1.71  | 1.81  | 0.87  | 0.31  | -0.40 | -0.22 | 0.48  | 1.07  | 0.22  | 4.39  | -0.31 | 1.76 |
| PLCAL       | 54825  | NM_017675    | 5872 | -0.49 | 1.05  | 0.96  | -0.33 | -0.69 | -0.27 | -0.30 | 1.51  | 0.55  | 1.52  | -0.76 | 1.76 |
| LOC1981     | 10326  | NM_000605    | 5873 | 1.22  | 1.31  | 1.63  | 0.80  | 0.98  | 0.60  | 0.98  | 0.60  | 0.62  | 2.27  | 1.30  | 1.76 |
| C11ORF24    | 53838  | NM_022338    | 5874 | 0.68  | 0.12  | 0.12  | -1.12 | -0.92 | -0.89 | 0.94  | 0.27  | 0.55  | 0.92  | -2.93 | 1.76 |
| KCNQ5       | 56479  | NM_019842    | 5875 | 0.65  | 0.15  | -0.47 | -0.37 | -0.44 | -0.21 | 2.12  | 0.02  | -0.38 | 0.33  | -1.02 | 1.76 |
| RANBP1      | 5970   | NM_018082    | 5876 | 0.54  | -0.61 | 0.82  | -1.49 | -1.42 | 0.45  | -1.12 | 0.42  | 0.46  | -0.52 | -1.54 | 1.76 |
| CRY1        | 1407   | NM_004075    | 5877 | 0.23  | 0.44  | 0.63  | -0.12 | -0.20 | -0.68 | 0.16  | 0.40  | 1.20  | 1.30  | 1.00  | 1.76 |
| ORS2E4      | 390881 | NM_001005165 | 5878 | 1.07  | 1.37  | 2.21  | 0.14  | 0.41  | 0.17  | 0.14  | 0.29  | 1.33  | 4.65  | 0.39  | 1.76 |
| TNNT3       | 7138   | NM_003283    | 5879 | 1.62  | 2.45  | 1.23  | 0.34  | 0.94  | 1.23  | 0.98  | 0.95  | -0.17 | 5.30  | 2.50  | 1.76 |
| NKX2-6B     | 401319 | NM_212557    | 5880 | 0.25  | 0.55  | 0.49  | 0.12  | -0.15 | -0.13 | 0.67  | -0.06 | 1.13  | 3.30  | 0.40  | 1.76 |
| KIAA1361    | 57551  | NM_002091    | 5881 | -0.40 | 0.53  | -0.34 | -0.99 | -0.32 | -0.93 | 0.98  | 0.41  | 0.37  | 0.59  | -2.24 | 1.76 |
| VPR1        | 7433   | NM_004624    | 5882 | 0.31  | 1.56  | 2.41  | 2.11  | 1.38  | 2.61  | 0.21  | 1.45  | 0.52  | 4.27  | 6.09  | 1.76 |
| FCR2        | 2350   | NM_000803    | 5883 | 0.04  | 0.45  | 0.14  | -0.42 | -0.84 | -0.11 | 0.42  | 0.47  | 0.62  | -0.63 | 0.53  | 1.76 |
| GNCS        | 2787   | NM_005274    | 5884 | -0.67 | -0.36 | 0.27  | 0.56  | -0.88 | -0.25 | -0.32 | 0.25  | 1.84  | 0.58  | -0.57 | 1.76 |
| SEFWS       | 6415   | NM_003009    | 5885 | 0.19  | 0.84  | 0.55  | -0.56 | -0.28 | -0.61 | 0.31  | 0.83  | 0.62  | 1.57  | -1.45 | 1.76 |
| FTFAP12-1   | 35333  | NM_015886    | 5886 | -0.14 | 0.68  | 0.68  | 0.21  | 1.10  | 0.92  | 1.65  | 1.06  | 0.26  | 7.22  | -4.23 | 1.76 |
| DERL2       | 51009  | NM_016041    | 5887 | 1.75  | -0.36 | 0.29  | -0.43 | -0.50 | 0.56  | 1.67  | -0.08 | 0.17  | 7.79  | 0.37  | 1.76 |
| UNQ2541     | 388912 | NM_203347    | 5888 | 1.19  | 1.07  | 0.52  | 1.87  | 0.93  | 1.19  | -0.08 | 1.26  | 0.57  | 1.22  | 4.00  | 1.76 |
| COML6       | 84955  | NM_002869    | 5889 | 0.80  | -0.19 | 0.37  | -0.91 | -0.29 | 0.34  | 1.53  | -0.09 | 0.32  | 0.97  | -1.06 | 1.76 |
| ARL11       | 7539   | NM_001028    | 5890 | 0.39  | 0.33  | 0.93  | 0.27  | 0.63  | 0.02  | 0.63  | 0.47  | 0.12  | 1.65  | 0.73  | 1.76 |
| PPP1R12A    | 4659   | NM_002480    | 5891 | 0.63  | 0.50  | 2.65  | 0.58  | 1.72  | 1.92  | 0.48  | 0.00  | 1.27  | 3.78  | 4.22  | 1.76 |
| MGC350319   | 254778 | NM_152765    | 5892 | -0.53 | 0.68  | 0.17  | -1.05 | -1.04 | -0.07 | -0.05 | 1.64  | 0.16  | 0.32  | -2.16 | 1.75 |
| ATP4A       | 242289 | NM_001033919 | 5893 | 0.43  | 0.64  | 0.60  | 0.16  | 0.27  | 0.16  | 0.16  | 0.27  | 0.16  | 0.94  | 0.27  | 1.75 |
| ATP6AP2     | 10159  | NM_005765    | 5894 | 1.13  | 1.34  | 1.24  | 0.20  | -0.15 | -1.11 | -0.05 | 0.52  | 1.28  | 3.70  | -1.05 | 1.75 |
| JNK         | 10019  | NM_005475    | 5895 | -0.74 | -0.71 | 0.00  | 1.35  | 0.88  | 0.13  | 0.75  | 0.57  | 1.92  | -1.45 | 2.36  | 1.75 |
| KAIS        | 83     | NM_0010751   | 5896 | -0.13 | -0.17 | 0.57  | -0.86 | -1.13 | 0.57  | 0.31  | 0.22  | 0.71  | 0.27  | 0.85  | 1.75 |
| THUMP02     | 80745  | NM_025264    | 5897 | 0.34  | 0.15  | -0.61 | -0.32 | -0.42 | -0.93 | 0.67  | 0.94  | 0.14  | -0.12 | -1.68 | 1.75 |
| CDAC1       | 81602  | NM_030911    | 5898 | 0.54  | -0.49 | 0.73  | 0.01  | -0.32 | 0.00  | 0.33  | 0.67  | 0.75  | 1.77  | -0.31 | 1.75 |
| IF2B3       | 1398   | NM_003415    | 5899 | -0.49 | -0.89 | -0.53 | -1.10 | -0.56 | -1.14 | 0.74  | -0.27 | 1.28  | 1.91  | -0.80 | 1.75 |
| IF2P2       | 5572   | NM_018400    | 5900 | 0.34  | 1.10  | 0.71  | 0.17  | 0.47  | 0.17  | 1.49  | 0.00  | 0.96  | 2.15  | 0.17  | 1.75 |
| NEF3        | 51330  | NM_016478    | 5901 | -0.81 | 0.30  | 0.06  | -0.97 | -0.99 | -0.26 | -1.12 | 1.49  | 0.37  | -0.45 | -2.21 | 1.75 |
| ELF3        | 1999   | NM_004433    | 5902 | 0.83  | 1.09  | 0.96  | 0.18  | -0.10 | -0.25 | 0.47  | 0.66  | 0.62  | 2.89  | -0.17 | 1.75 |
| BANP1       | 923    | NM_004742    | 5903 | 0.88  | 1.63  | 1.88  | 0.22  | 0.16  | 0.22  | 0.62  | 1.23  | 0.67  | 0.92  | 0.73  | 1.75 |
| MTX1        | 4501   | NM_005592    | 5904 | 0.50  | 0.00  | -0.78 | -0.44 | -0.71 | -0.37 | 1.88  | 0.29  | -0.42 | -0.27 | -1.52 | 1.75 |

|           |        |              |      |       |       |       |       |       |       |       |       |       |       |       |      |
|-----------|--------|--------------|------|-------|-------|-------|-------|-------|-------|-------|-------|-------|-------|-------|------|
| FDP5      | 2224   | NM_002004    | 5987 | -0.59 | -0.33 | -0.52 | -0.94 | 0.26  | -0.98 | 0.40  | 0.10  | 1.19  | -1.45 | -1.66 | 1.69 |
| ALH4      | 3632   | NM_001001617 | 5988 | 0.54  | 0.28  | 0.00  | -0.54 | -0.69 | 1.27  | -0.17 | 0.37  | 1.59  | -1.59 | -1.68 | 1.69 |
| LOC38890  | 38896  | NM_001080474 | 5989 | 0.71  | 1.02  | 1.53  | 1.41  | 0.35  | 0.84  | -0.37 | 1.26  | 0.80  | 3.25  | 2.61  | 1.69 |
| LOC38915  | 38915  | NM_001013650 | 5990 | -0.88 | -0.28 | 1.80  | -1.50 | -1.75 | -0.42 | -0.30 | 0.61  | 1.38  | 0.65  | -3.66 | 1.69 |
| LOC34936  | 34936  | NM_198285    | 5991 | 0.04  | -0.16 | 0.71  | -1.18 | 0.02  | -0.23 | 0.22  | -0.06 | 1.43  | 0.59  | -0.38 | 1.69 |
| MC43      | 24633  | NM_002252    | 5992 | 1.82  | 1.64  | 0.78  | 1.82  | 0.81  | 0.34  | 1.40  | 0.07  | 0.32  | 3.25  | 0.84  | 1.69 |
| PCDH46    | 56142  | NM_00131848  | 5993 | 0.17  | 0.30  | 0.97  | -0.05 | -0.68 | -0.25 | -0.21 | 0.69  | 1.21  | 1.44  | -0.98 | 1.69 |
| CDRFR18   | 254956 | NM_198469    | 5994 | 0.35  | -0.10 | -0.07 | -0.93 | -0.06 | -0.70 | 0.85  | 0.39  | 0.45  | 0.18  | -1.70 | 1.69 |
| TMT       | 162836 | NM_002381    | 5995 | 0.81  | 0.62  | 0.61  | -0.12 | 0.69  | 0.12  | 0.69  | 0.12  | 0.69  | 0.12  | 0.69  | 1.69 |
| QMS1      | 4938   | NM_002534    | 5996 | 3.12  | 2.01  | 3.50  | 1.26  | 1.15  | 2.00  | 1.06  | 1.10  | 0.53  | 8.63  | 4.40  | 1.69 |
| CAMP7     | 164633 | NM_182527    | 5997 | 0.17  | 0.47  | -0.01 | -0.14 | -0.45 | -0.09 | 0.19  | 1.00  | 0.49  | 0.63  | -0.68 | 1.69 |
| MGC39520  | 19647  | NM_0025364   | 5998 | 0.08  | 0.08  | 0.09  | -0.09 | -0.08 | -0.09 | 0.08  | 0.09  | 0.09  | 0.07  | -0.02 | 1.69 |
| H0XA3     | 3200   | NM_153632    | 5999 | 0.90  | 0.57  | -0.08 | -1.18 | -1.42 | -1.30 | 0.03  | 0.57  | 1.08  | -1.55 | -3.90 | 1.69 |
| DAXX      | 1616   | NM_001350    | 6000 | 0.31  | 0.33  | 0.07  | -0.34 | -0.75 | -0.90 | 0.41  | 0.69  | 0.59  | 0.71  | -1.99 | 1.69 |
| LC6A      | 199834 | NM_178356    | 6001 | -0.96 | -0.21 | -0.45 | -1.32 | -1.19 | -1.18 | -0.18 | 1.52  | 0.34  | -1.62 | -3.89 | 1.69 |
| GP8E1     | 27138  | NM_002554    | 6002 | 2.66  | 1.78  | 1.75  | 1.46  | 0.78  | 0.72  | 0.39  | 0.67  | 0.61  | 6.19  | 0.96  | 1.68 |
| ORS5A2    | 390181 | NM_001005323 | 6003 | -0.15 | -0.02 | -0.52 | -0.75 | -0.84 | -0.69 | 1.28  | 0.29  | 0.11  | -0.69 | -2.28 | 1.68 |
| AAAS      | 8086   | NM_015665    | 6004 | 2.26  | 3.65  | 3.81  | 0.47  | 0.81  | 2.09  | 0.67  | 0.63  | 0.38  | 9.72  | 3.37  | 1.68 |
| DC244     | 13354  | NM_001001659 | 6005 | 0.75  | 0.35  | 0.17  | -0.01 | 1.51  | -0.20 | 1.65  | -0.78 | 0.81  | 0.56  | 1.29  | 1.68 |
| FAM30     | 131177 | NM_138805    | 6006 | 0.97  | 0.15  | 0.07  | 0.07  | -0.48 | -0.66 | 0.60  | 0.34  | 0.74  | 1.18  | -1.06 | 1.68 |
| ALS2C13   | 150864 | NM_173511    | 6007 | 0.69  | 1.55  | 0.67  | -0.49 | 0.14  | -0.29 | 0.49  | 0.64  | 0.55  | 2.91  | -0.64 | 1.68 |
| ACTD15    | 79047  | NM_002076    | 6008 | 1.30  | 2.10  | 1.59  | -0.01 | 0.51  | 0.33  | 0.36  | 0.54  | 0.78  | 4.99  | 0.83  | 1.68 |
| CATSPER2  | 117155 | NM_172097    | 6009 | 0.34  | -0.05 | -0.02 | -0.62 | -1.27 | -0.34 | 0.91  | 0.85  | -0.08 | 0.27  | 2.24  | 1.68 |
| CYP2C19   | 1557   | NM_000769    | 6010 | 0.49  | 1.33  | 0.89  | -0.51 | 0.95  | -0.36 | 0.67  | 0.37  | 0.63  | 2.71  | 0.08  | 1.68 |
| STRP      | 128229 | NM_144427    | 6011 | 0.07  | 0.35  | 1.05  | 1.61  | -0.74 | 0.99  | 0.01  | 1.44  | 0.23  | 1.46  | 1.85  | 1.68 |
| TSOP      | 5592   | NM_018492    | 6012 | 0.21  | 0.54  | 0.25  | 0.97  | 0.57  | 1.15  | 0.45  | 1.08  | 0.14  | 1.00  | 2.70  | 1.68 |
| FBX11     | 122992 | NM_012308    | 6013 | 0.43  | 1.76  | 1.07  | 0.08  | 0.65  | 0.04  | 0.06  | 1.01  | 0.61  | 3.26  | 0.76  | 1.68 |
| BNR18     | 658    | NM_001203    | 6014 | 0.91  | -0.03 | 0.28  | -0.08 | 0.45  | -0.31 | 1.47  | -0.17 | 0.38  | 1.15  | 0.06  | 1.67 |
| USP25     | 2916   | NM_013296    | 6015 | 2.95  | 1.66  | 0.62  | 1.66  | 1.23  | -0.04 | 1.66  | 1.23  | -0.04 | 2.28  | 1.47  | 1.67 |
| ALKBH     | 8846   | NM_006020    | 6016 | 1.60  | 1.16  | 0.49  | 0.33  | -0.22 | -0.21 | 0.66  | 0.98  | 0.03  | 3.25  | -0.11 | 1.67 |
| LOC138046 | 138046 | NM_001100391 | 6017 | 0.87  | 0.81  | 0.31  | 0.09  | -0.26 | 0.41  | 1.15  | 0.85  | -0.32 | 2.00  | 0.23  | 1.67 |
| H0D2      | 2319   | NM_001207    | 6018 | 0.15  | -0.08 | -0.07 | -0.18 | -0.04 | -0.01 | 2.24  | 0.11  | 0.15  | -0.79 | -1.31 | 1.67 |
| LOC38946  | 38946  | NM_003086    | 6019 | 0.42  | 0.97  | 1.45  | 0.85  | 0.16  | 0.21  | -0.19 | 0.40  | 1.46  | 2.84  | 1.22  | 1.67 |
| FIL       | 2512   | NM_000146    | 6020 | 0.26  | 0.82  | -0.18 | -0.45 | -0.46 | 0.14  | -0.28 | 0.78  | -0.39 | 0.90  | -0.76 | 1.67 |
| MMP21     | 118556 | NM_147191    | 6021 | -0.25 | 1.68  | 0.20  | 0.78  | -0.25 | -0.04 | -0.58 | 1.98  | 0.27  | 1.63  | 0.50  | 1.67 |
| PARG      | 8920   | NM_000531    | 6022 | 0.32  | 1.00  | 0.38  | -0.03 | 0.14  | 1.60  | 0.40  | 0.14  | 0.38  | 0.29  | 1.74  | 1.67 |
| LOC64168  | 64168  | NM_001080520 | 6023 | -0.51 | -1.31 | -0.20 | -2.01 | -1.33 | -1.28 | 1.86  | -0.45 | 0.26  | -2.03 | -4.62 | 1.67 |
| ULBP3     | 79465  | NM_024518    | 6024 | 1.68  | 1.23  | 0.36  | -0.29 | -0.30 | -0.19 | 0.72  | 0.69  | 0.26  | 3.26  | -0.78 | 1.67 |
| TRIP8P    | 2744   | NM_001840    | 6025 | 1.02  | 0.73  | 0.67  | -0.18 | 1.67  | 0.17  | 1.63  | 0.17  | 0.63  | 3.80  | 1.23  | 1.67 |
| CLCA2     | 9635   | NM_006536    | 6026 | 0.65  | 0.47  | 0.31  | -0.36 | -0.33 | -0.07 | 0.74  | 0.78  | 0.14  | 1.43  | -0.76 | 1.67 |
| OKH5      | 219875 | NM_001001965 | 6027 | 1.36  | 0.27  | 2.65  | 3.89  | 3.29  | 1.12  | 0.89  | 0.34  | 1.12  | 4.29  | 8.30  | 1.67 |
| HLI1      | 6486   | NM_001001965 | 6028 | -0.15 | -0.44 | -0.68 | -0.14 | -0.44 | -0.68 | -0.14 | -0.44 | -0.68 | -1.26 | -2.99 | 1.67 |
| GDPS      | 8200   | NM_000557    | 6029 | 0.40  | 0.68  | 0.92  | -0.21 | -0.26 | 0.23  | 0.17  | 0.85  | 0.64  | 2.00  | 0.24  | 1.67 |
| LD83      | 11155  | NM_000708    | 6030 | -0.18 | 0.45  | 0.54  | -0.62 | 0.23  | -1.04 | 0.02  | -0.02 | 1.67  | 0.81  | -1.43 | 1.67 |
| TBL1      | 6907   | NM_005647    | 6031 | -1.49 | -0.09 | 0.85  | 0.89  | 2.70  | 1.54  | 1.96  | -0.51 | 0.22  | 2.25  | 5.13  | 1.67 |
| ATAD2     | 8498   | NM_002810    | 6032 | 1.09  | 0.31  | 0.62  | 0.31  | 0.49  | 1.42  | 0.57  | 0.49  | 1.42  | 0.31  | 1.54  | 1.67 |
| USP15     | 9958   | NM_006313    | 6033 | -1.09 | -0.28 | 0.01  | -1.25 | -1.15 | -1.31 | -0.49 | 0.57  | 1.59  | -1.36 | -3.70 | 1.67 |
| ALDOA     | 226    | NM_184041    | 6034 | -1.00 | -0.71 | -1.11 | -1.72 | -1.24 | -1.37 | 1.59  | 0.22  | -0.14 | -2.81 | -4.33 | 1.67 |
| 53L1      | 531    | NM_001820    | 6035 | 1.01  | 1.82  | 1.00  | -0.15 | 0.60  | 0.21  | 0.15  | 0.60  | 0.21  | 1.01  | 0.95  | 1.67 |
| CCX       | 885    | NM_000729    | 6036 | -0.23 | -0.32 | 0.06  | -1.56 | -1.19 | -0.96 | 0.75  | 0.14  | 0.78  | -0.48 | -3.71 | 1.67 |
| CDRFR6    | 29078  | NM_014165    | 6037 | 0.66  | 0.45  | 0.75  | -0.35 | -0.06 | -0.07 | 0.78  | 0.36  | 0.53  | 1.86  | -0.49 | 1.67 |
| HLICE1    | 10973  | NM_001001965 | 6038 | -0.14 | 0.24  | 0.61  | -0.15 | -0.19 | 0.23  | 0.61  | -0.15 | -0.19 | -0.52 | -1.50 | 1.67 |
| QTR       | 5021   | NM_000916    | 6039 | 0.08  | 0.42  | -0.37 | -1.10 | -1.03 | -0.08 | 0.86  | 1.05  | -0.25 | 1.12  | -2.21 | 1.66 |
| GRF1      | 8373   | NM_013196    | 6040 | 0.28  | 0.14  | -0.43 | -0.73 | -0.92 | -0.81 | 0.47  | 0.99  | 0.20  | 0.00  | -2.46 | 1.66 |
| ICAM4     | 3386   | NM_001093332 | 6041 | 0.91  | 0.89  | 1.08  | -0.01 | 0.25  | 0.01  | 0.89  | 0.48  | 0.49  | 2.86  | 0.26  | 1.66 |
| TROK10    | 8015   | NM_001715    | 6042 | 0.40  | -0.26 | 0.26  | 0.21  | 0.42  | 0.26  | 0.42  | 0.26  | 0.42  | 0.78  | 0.49  | 1.66 |
| SLC22A8   | 9376   | NM_004254    | 6043 | -0.83 | -0.58 | 0.92  | -1.26 | -1.70 | -1.46 | 0.04  | -0.08 | 1.78  | -0.49 | -3.41 | 1.66 |
| WDR34     | 89891  | NM_052844    | 6044 | -0.48 | -0.62 | -0.91 | -1.72 | -1.30 | -1.34 | 0.96  | 0.61  | 0.09  | -2.37 | -4.36 | 1.66 |
| SLC22A2   | 530    | NM_000300    | 6045 | 0.99  | 0.38  | 1.27  | 0.64  | 0.66  | 0.68  | 0.66  | 0.68  | 0.66  | 1.09  | 0.68  | 1.66 |
| SNAPAP    | 23557  | NM_012437    | 6046 | 0.25  | 1.39  | 1.61  | 0.33  | -0.31 | -0.35 | -0.29 | 1.00  | 0.95  | 3.24  | -0.33 | 1.66 |
| FBHEP3    | 8637   | NM_003732    | 6047 | 1.39  | 0.65  | 0.11  | -0.14 | 0.97  | 0.49  | 1.40  | 0.45  | -0.19 | 2.15  | 1.31  | 1.66 |
| GNP2      | 80852  | NM_001090423 | 6048 | 0.26  | 0.02  | 0.22  | 0.36  | 0.23  | 0.16  | 0.36  | 0.23  | 0.16  | -0.01 | 0.44  | 1.66 |
| STGALNAC1 | 55808  | NM_018414    | 6049 | 1.25  | 0.50  | 0.21  | -0.47 | -0.78 | 0.10  | 0.42  | 0.90  | 0.33  | 0.86  | -1.14 | 1.66 |
| HEM1      | 3071   | NM_005337    | 6050 | -0.24 | 0.75  | 0.28  | -0.33 | 0.32  | -0.56 | 0.90  | 0.15  | 0.61  | 2.27  | -0.57 | 1.65 |
| PDCDOP    | 10035  | NM_013374    | 6051 | -0.92 | 0.26  | -0.08 | -1.05 | -1.16 | -0.93 | -0.55 | 2.10  | 0.10  | -0.72 | -2.54 | 1.65 |
| TRIP8P    | 2342   | NM_001840    | 6052 | 0.38  | 1.11  | 0.75  | 0.68  | 1.42  | 1.14  | 0.68  | 1.42  | 1.14  | 0.68  | 1.29  | 1.65 |
| TRIM59    | 286827 | NM_173084    | 6053 | 6.89  | 13.88 | 12.81 | 4.28  | 2.81  | 2.89  | 0.18  | 0.61  | 0.86  | 33.58 | 9.98  | 1.65 |
| LOC157570 | 157570 | NM_001017420 | 6054 | 0.79  | 0.49  | 2.17  | 1.41  | 0.14  | 0.68  | -0.83 | 0.56  | 1.93  | 1.87  | 2.23  | 1.65 |
| LC3E1     | 35315  | NM_006536    | 6055 | -1.09 | 0.66  | 0.78  | -0.86 | -0.86 | -0.86 | -0.86 | -0.86 | -0.86 | -1.86 | -3.26 | 1.65 |
| SCAMP1    | 9522   | NM_052822    | 6056 | 0.43  | 0.61  | 0.67  | 0.24  | 0.38  | 0.17  | 0.12  | 0.29  | 1.24  | 1.72  | 0.79  | 1.65 |
| ZNF221    | 7638   | NM_013159    | 6057 | 0.97  | 1.05  | 0.25  | -0.42 | 0.03  | -0.14 | 0.45  | 0.50  | 0.70  | 2.27  | -0.53 | 1.65 |
| HMAP      | 7071   | NM_001559    | 6058 | -4.06 | -0.73 | 0.26  | -0.67 | -0.73 | -0.69 | 0.19  | 0.26  | 0.19  | -0.52 | -2.59 | 1.65 |
| DAZ1      | 1617   | NM_004081    | 6059 | -0.16 | 0.39  | 0.25  | -0.02 | -0.11 | -0.02 | 0.26  | 1.00  | 0.39  | 0.48  | 0.39  | 1.65 |
| PHGDH1    | 33760  | NM_177967    | 6060 | 0.33  | 0.00  | -0.04 | -0.41 | -0.73 | -0.58 | 0.53  | 0.35  | 0.77  | 0.00  | -1.73 | 1.65 |
| LOC150883 | 150883 | NM_207127    | 6061 | 1.57  | 1.71  | 0.26  | 0.20  | -0.26 | 0.00  | 0.88  | 0.94  | -0.17 | 3.54  | -0.05 | 1.65 |
| DOC2      | 5170   | NM_018003    | 6062 | 1.75  | 1.44  | 1.04  | 1.40  | 1.20  | 0.81  | 1.24  | 0.60  | 0.74  | 6.43  | 1.80  | 1.65 |
| TOM112    | 146691 | NM_144678    | 6063 | 0.79  | 1.58  | 0.92  | -0.23 | 0.32  | 0.92  | 0.60  | 1.15  | -0.10 | 3.29  | 1.01  | 1.65 |
| SLC24A2   | 25769  | NM_020044    | 6064 | -0.62 | 0.35  | 1.05  | -1.47 | -1.34 | -1.27 | -1.12 | 0.41  | 1.36  | -0.78 | -4.08 | 1.65 |
| SNAPAP    | 23557  | NM_012437    | 6065 | 1.64  | 1.18  | 1.04  | 1.64  | 1.18  | 1.04  | 1.64  | 1.18  | 1.04  | 1.64  | 1.18  | 1.65 |
| FAM48B1   | 16408  | NM_001136234 | 6066 | 0.03  | -1.39 | 2.14  | -0.01 | 0.45  | 0.69  | 0.21  | 0.64  | 0.81  | 3.56  | 1.13  | 1.65 |
| RP18      | 6169   | NM_001035258 |      |       |       |       |       |       |       |       |       |       |       |       |      |

|            |        |              |        |       |       |       |       |       |       |       |       |       |       |       |      |
|------------|--------|--------------|--------|-------|-------|-------|-------|-------|-------|-------|-------|-------|-------|-------|------|
| MUC17      | 140453 | NM_001040105 | 6149   | -0.56 | 0.50  | 0.33  | -0.51 | -0.30 | -0.48 | -0.14 | 0.50  | 1.25  | 0.27  | -1.29 | 1.60 |
| MG41       | 2698   | NM_001001061 | 6150   | 1.86  | 0.46  | 1.20  | -0.80 | -0.86 | -0.68 | 0.31  | -0.24 | 0.72  | 0.22  | 3.43  | 1.60 |
| SNCG       | 6623   | NM_003087    | 6151   | 0.81  | 1.00  | -0.15 | 0.08  | 0.37  | -0.35 | 0.90  | 0.56  | 0.15  | 1.62  | 0.10  | 1.60 |
| UBOK5      | 22888  | NM_199415    | 6152   | 8.31  | 14.77 | 19.06 | 9.77  | 5.83  | 10.18 | 0.33  | 0.60  | 0.67  | 42.14 | 25.78 | 1.60 |
| HT44       | 20310  | NM_153592    | 6153   | 0.22  | 0.24  | 0.49  | 0.02  | -0.22 | -0.03 | 0.41  | 0.88  | 0.31  | 1.05  | -0.24 | 1.60 |
| EL19       | 29949  | NM_031798    | 6154   | 0.74  | 0.96  | 0.48  | 0.64  | 0.84  | 0.61  | 0.28  | 0.61  | 0.28  | 2.18  | 0.28  | 1.60 |
| MG65404    | 79904  | NM_024111    | 6155   | -0.99 | 0.44  | -0.37 | -0.29 | -0.41 | -0.81 | -0.27 | 1.63  | 0.24  | -0.71 | -1.51 | 1.60 |
| ADAMTS2    | 9599   | NM_021099    | 6156   | -0.08 | -0.42 | -0.40 | -1.67 | -0.37 | -1.01 | 1.51  | 0.07  | 0.02  | -0.95 | -3.05 | 1.60 |
| MISA       | 58478  | NM_001204    | 6157   | 0.83  | 1.85  | 0.99  | -0.27 | 0.44  | -0.22 | 0.29  | 0.61  | 0.70  | 3.47  | 0.06  | 1.60 |
| TFP2       | 7980   | NM_006528    | 6158   | 0.07  | 1.98  | 0.63  | 0.20  | 0.41  | -0.40 | 0.40  | 1.28  | 0.71  | 2.69  | 0.22  | 1.60 |
| FYB        | 2513   | NM_199135    | 6159   | -0.04 | 1.03  | -0.91 | -0.98 | -0.50 | 0.03  | 1.02  | 1.06  | 0.49  | 0.08  | -1.45 | 1.60 |
| CG61070    | 22142  | NM_0010730   | 6160   | -0.08 | 1.04  | -0.57 | -0.89 | -0.10 | 0.42  | 0.50  | 0.42  | 0.30  | 2.51  | -0.72 | 1.59 |
| HMGN3      | 9324   | NM_138730    | 6161   | -0.54 | -0.13 | -0.73 | -0.84 | -0.91 | -0.56 | 0.21  | 1.22  | 0.17  | -1.14 | -2.31 | 1.59 |
| ALDOB      | 229    | NM_000035    | 6162   | -0.24 | -1.03 | 2.16  | -0.23 | -0.69 | -0.88 | 0.19  | -0.61 | 2.01  | 0.89  | -1.80 | 1.59 |
| QDRP       | 5860   | NM_000320    | 6163   | 0.79  | 0.37  | 1.05  | 0.34  | -0.14 | 0.00  | 0.32  | 0.42  | 0.86  | 2.21  | 0.20  | 1.59 |
| NHRA       | 3624   | NM_000192    | 6164   | 0.83  | 1.85  | 0.99  | -0.27 | 0.44  | -0.22 | 0.29  | 0.61  | 0.70  | 3.47  | 0.06  | 1.59 |
| ZNF415     | 55786  | NM_001136038 | 6165   | 0.15  | 0.13  | -0.33 | -1.15 | -1.02 | -0.83 | 0.92  | 0.46  | 0.22  | -0.05 | -3.00 | 1.59 |
| DK1        | 22943  | NM_012242    | 6166   | 0.46  | 0.69  | 1.26  | 0.20  | 0.11  | 0.17  | 0.33  | 0.49  | 0.77  | 2.41  | 0.48  | 1.59 |
| MUC5       | 23499  | NM_0010290   | 6167   | 1.15  | 1.48  | 1.66  | -0.22 | 0.99  | -0.07 | 0.53  | 0.13  | 0.93  | 4.29  | 0.71  | 1.58 |
| LOC253827  | 253827 | NM_198080    | 6168   | 1.39  | 0.92  | 0.54  | 0.34  | 0.10  | 0.18  | 0.40  | 0.66  | 0.53  | 2.84  | 0.62  | 1.58 |
| GAB3       | 139716 | NM_080612    | 6169   | 1.84  | -1.38 | -0.49 | -0.87 | -1.31 | -0.95 | 1.34  | 0.51  | 0.76  | -0.04 | -3.13 | 1.58 |
| LMAN1      | 3998   | NM_005070    | 6170   | 0.88  | 1.15  | 1.57  | -0.17 | -0.08 | 0.54  | 0.74  | 0.61  | 0.24  | 3.59  | 0.30  | 1.58 |
| OR14       | 26219  | NM_001004452 | 6171   | 0.08  | 0.16  | 0.25  | -0.34 | -0.46 | -0.02 | 0.26  | 0.92  | 0.41  | 0.33  | 0.82  | 1.58 |
| OC90       | 729130 | NM_001129959 | 6172   | 0.74  | 0.69  | 1.55  | -0.12 | 0.44  | 0.65  | 0.66  | 0.35  | 0.58  | 2.98  | 0.97  | 1.58 |
| COMM01     | 150688 | NM_152516    | 6173   | -1.02 | -0.06 | 0.00  | -0.07 | -0.10 | 0.00  | 1.82  | -0.07 | -0.16 | 0.06  | -0.17 | 1.58 |
| USP        | 64167  | NM_002290    | 6174   | -0.51 | -0.06 | -0.09 | 0.41  | 0.25  | 0.25  | -0.25 | 1.86  | 0.02  | -0.66 | 0.91  | 1.58 |
| FLU4578    | 374872 | NM_198532    | 6175   | -0.15 | -1.45 | -0.87 | -1.57 | -1.57 | -1.31 | 1.11  | -0.31 | 0.79  | -3.37 | -4.45 | 1.58 |
| ZNF509     | 166793 | NM_145291    | 6176   | 2.73  | 4.95  | 2.43  | 0.79  | 2.67  | 2.07  | 0.46  | 0.15  | 0.97  | 10.11 | 3.73  | 1.58 |
| GCL13      | 2486   | NM_178025    | 6177   | 1.29  | 1.35  | 1.45  | 1.54  | 1.54  | 1.54  | 1.54  | 1.54  | 1.54  | 4.98  | 2.51  | 1.58 |
| POLR2H     | 5437   | NM_006232    | 6178   | -0.96 | -1.71 | -1.05 | -3.00 | -2.61 | -2.69 | 3.32  | -0.87 | -0.86 | -4.32 | -8.30 | 1.58 |
| TFAP       | 51567  | NM_016614    | 6179   | 2.16  | 1.01  | 0.55  | -0.27 | -0.11 | 0.27  | 0.92  | 0.50  | 0.16  | 3.72  | -0.11 | 1.58 |
| MG6396     | 6589   | NM_000942    | 6180   | 0.49  | -0.28 | -0.40 | -0.66 | -0.64 | -0.66 | 1.21  | 0.00  | 0.42  | 0.60  | -0.17 | 1.58 |
| PQDN3      | 23024  | NM_015009    | 6181   | 1.00  | 0.88  | 0.18  | 0.37  | 0.28  | 0.30  | 0.62  | 0.91  | 0.06  | 2.06  | 0.95  | 1.58 |
| DFZP676221 | 131544 | NM_153605    | 6182   | 0.31  | 0.43  | 1.52  | -0.37 | 0.14  | -0.34 | 0.14  | 0.60  | 0.85  | 2.26  | -0.56 | 1.58 |
| KCTD16     | 57528  | NM_020768    | 6183   | 0.67  | 1.51  | -0.11 | -0.50 | 0.28  | -0.53 | 0.59  | 0.89  | 0.10  | 2.08  | -0.55 | 1.58 |
| MG629624   | 31481  | NM_152294    | 6184   | 0.68  | 0.33  | 0.33  | 0.34  | 0.24  | 0.41  | 0.79  | 0.24  | 0.11  | 0.68  | 1.41  | 1.58 |
| RGS1       | 5996   | NM_002922    | 6185   | 0.50  | 1.02  | 0.11  | 0.38  | -0.29 | 0.02  | 0.38  | 1.42  | -0.22 | 1.63  | 0.07  | 1.58 |
| ZNF22      | 7570   | NM_006963    | 6186   | 1.21  | -0.02 | 0.72  | -0.02 | -0.18 | -0.61 | 0.39  | 0.22  | 0.96  | 1.90  | -0.80 | 1.58 |
| FLN1468    | 5761   | NM_002854    | 6187   | 0.19  | -0.97 | 0.12  | 0.16  | 0.18  | 0.29  | 0.18  | 0.29  | 0.44  | 2.49  | 1.73  | 1.58 |
| SARM1      | 23908  | NM_015077    | 6188   | -0.12 | 1.33  | 1.40  | -0.66 | 0.21  | -0.27 | 0.05  | 0.47  | 1.06  | 2.60  | -0.71 | 1.58 |
| H2FBWT     | 158983 | NM_001002916 | 6189   | 0.41  | 1.33  | 2.76  | 0.35  | 0.54  | 0.67  | 0.39  | 0.17  | 1.02  | 4.49  | 0.87  | 1.58 |
| HLGA2      | 13545  | NM_001002916 | 6190   | -0.68 | 0.06  | 1.12  | 0.75  | 1.45  | 0.88  | 0.97  | 0.34  | 0.62  | 1.58  | -0.62 | 1.58 |
| TEIG       | 7974   | NM_005655    | 6191   | 0.69  | 1.84  | 1.04  | 0.44  | -0.25 | 0.18  | -0.06 | 1.13  | 0.51  | 3.66  | 0.37  | 1.58 |
| AK1        | 203    | NM_000476    | 6192   | 1.31  | 0.57  | 1.46  | -0.68 | 0.47  | 0.43  | 0.52  | 0.36  | 0.70  | 3.34  | 1.57  | 1.57 |
| OR5M1      | 390158 | NM_001004740 | 6193   | -0.24 | 0.03  | -0.42 | -0.56 | -0.66 | -0.79 | -0.09 | 1.64  | 0.02  | -0.62 | -1.95 | 1.57 |
| FLN418     | 1194   | NM_0010730   | 6194   | 0.77  | 0.30  | 0.21  | -0.32 | 0.87  | 0.29  | 0.32  | 0.87  | 0.29  | 0.86  | 0.97  | 1.57 |
| EPB414A    | 64997  | NM_022140    | 6195   | 0.26  | 1.12  | 0.85  | 0.40  | 0.45  | 0.03  | 0.28  | 0.73  | 0.56  | 3.24  | 0.88  | 1.57 |
| CFR202     | 51608  | NM_015949    | 6196   | 0.19  | 0.29  | 0.39  | -0.35 | -0.69 | -0.62 | 0.23  | 0.63  | 0.70  | 0.87  | -1.66 | 1.57 |
| RAR39      | 8242   | NM_001296    | 6197   | 1.89  | 1.84  | 1.57  | 1.89  | 1.84  | 1.57  | 1.89  | 1.84  | 1.57  | 6.30  | 2.93  | 1.57 |
| LOC40204   | 340204 | NM_001010886 | 6198   | -0.41 | -0.17 | 0.29  | -0.39 | -0.75 | -0.58 | -0.11 | 1.52  | 0.17  | -0.28 | -1.72 | 1.57 |
| DCC        | 1630   | NM_000215    | 6199   | 0.65  | 1.13  | 0.93  | -0.33 | -0.28 | 0.57  | 0.33  | 0.64  | 0.60  | 2.72  | -0.04 | 1.57 |
| LOC529A    | 5081   | NM_0010119   | 6200   | 1.19  | 0.63  | 0.19  | 0.63  | 0.19  | 0.63  | 0.19  | 0.63  | 0.19  | 2.01  | 1.52  | 1.57 |
| HE3        | 113201 | NM_177974    | 6201   | 0.44  | -0.53 | -0.15 | -0.77 | -0.91 | -0.20 | 1.87  | -0.21 | -0.08 | -2.28 | -1.88 | 1.57 |
| RG8        | 5917   | NM_002887    | 6202   | 3.34  | 0.40  | -0.47 | -0.26 | -1.02 | 0.54  | 0.39  | 1.86  | -0.69 | 2.28  | 0.74  | 1.57 |
| MALL       | 11344  | NM_001037994 | 6203   | 1.22  | 0.80  | 0.56  | 0.22  | -0.20 | 0.21  | 0.68  | 0.86  | 0.03  | 2.58  | 0.23  | 1.57 |
| MG635138   | 26632  | NM_175073    | 6204   | 1.28  | -1.16 | 0.60  | -1.45 | -1.29 | -1.42 | 1.22  | 0.52  | 2.06  | 2.19  | -1.13 | 1.57 |
| GFP11      | 2673   | NM_002056    | 6205   | 0.21  | -0.42 | 0.05  | -0.95 | -0.61 | -0.84 | 1.39  | -0.11 | 0.28  | -1.17 | -2.40 | 1.57 |
| SH3BGRL3   | 83442  | NM_031286    | 6206   | 1.80  | 0.16  | 0.80  | 0.00  | 0.41  | 0.20  | 1.67  | 0.00  | -0.10 | 2.76  | 0.63  | 1.56 |
| MG637      | 55324  | NM_001858    | 6207   | 1.04  | 0.07  | 0.14  | 1.04  | 0.17  | 0.64  | 0.17  | 1.30  | 0.14  | 1.45  | 1.54  | 1.56 |
| HMK2       | 3167   | NM_005519    | 6208   | 0.49  | 0.88  | -0.56 | -0.21 | -0.63 | -0.08 | -0.17 | 1.91  | -0.18 | 0.82  | -0.92 | 1.56 |
| FLN4919    | 144809 | NM_182508    | 6209   | 0.32  | 1.00  | 1.06  | 0.40  | 0.35  | -0.03 | 0.02  | -0.05 | 1.59  | 2.38  | 0.36  | 1.56 |
| NHR452     | 2851   | NM_001945    | 6210   | 0.62  | 0.84  | 0.68  | 0.48  | 0.35  | 0.44  | 0.40  | 0.68  | 0.84  | 2.44  | 1.92  | 1.56 |
| BTX        | 695    | NM_000061    | 6211   | 0.85  | 0.14  | 0.41  | 0.03  | -0.05 | -1.03 | 0.17  | 0.15  | 1.24  | 1.40  | -1.04 | 1.56 |
| RIC5       | 9743   | NM_014715    | 6212   | 1.95  | 1.49  | 0.85  | 0.32  | 0.99  | 0.31  | 0.72  | 0.28  | 0.55  | 4.29  | 1.50  | 1.56 |
| FCR3B      | 2215   | NM_000570    | 6213   | 0.75  | -0.16 | 1.15  | -0.12 | 0.03  | -0.14 | 0.54  | 0.01  | 1.01  | 1.75  | -0.23 | 1.56 |
| NOTE1      | 9214   | NM_004779    | 6214   | 1.59  | 1.56  | 1.39  | 1.59  | 1.56  | 1.39  | 1.59  | 1.56  | 1.39  | 3.34  | 1.14  | 1.56 |
| APHO       | 350    | NM_000042    | 6215   | -0.95 | -0.89 | 0.18  | -1.10 | -0.70 | -1.00 | 0.48  | -0.49 | 1.56  | -1.66 | -1.66 | 1.56 |
| URB        | 151887 | NM_199512    | 6216   | 0.46  | -0.46 | 0.72  | -0.10 | -0.10 | -0.70 | -0.17 | -0.18 | 1.57  | 0.72  | -0.90 | 1.56 |
| PR155      | 151536 | NM_0012929   | 6217   | 1.78  | 1.26  | 0.89  | 0.05  | -0.62 | -0.65 | 0.62  | 0.65  | 0.62  | 2.99  | 0.78  | 1.56 |
| TNFRSF12A  | 51330  | NM_016639    | 6218   | 1.47  | -0.06 | 0.27  | -0.45 | -1.34 | -0.55 | 0.77  | 0.50  | 0.29  | 1.67  | -2.33 | 1.56 |
| C10ORF26   | 54838  | NM_001089313 | 6219   | 0.60  | -0.23 | 0.08  | -0.70 | -0.79 | -0.39 | 1.05  | 0.32  | 0.18  | 0.45  | -1.88 | 1.56 |
| LOC528     | 11140  | NM_0010169   | 6220   | -0.53 | -0.74 | -0.29 | -1.22 | -1.15 | -1.28 | 1.04  | -0.11 | -0.11 | -1.56 | -1.20 | 1.56 |
| COX11      | 8814   | NM_004196    | 6221   | 1.33  | 0.34  | 0.26  | 0.95  | 1.04  | 1.01  | 0.46  | -0.43 | 1.52  | 3.00  | 1.05  | 1.56 |
| ACE        | 1636   | NM_152830    | 6222   | 1.00  | -0.11 | -0.30 | -0.35 | -0.81 | -0.48 | 1.01  | 0.56  | -0.02 | 0.82  | -1.64 | 1.55 |
| MGAGE4     | 4103   | NM_00110550  | 6223   | 1.72  | -0.30 | -0.78 | -0.96 | -0.99 | -0.86 | 1.19  | 0.51  | -0.15 | -0.36 | -2.81 | 1.55 |
| LOC6       | 9074   | NM_021195    | 6224   | 0.26  | 0.25  | 0.17  | 0.50  | 0.11  | 0.48  | 0.05  | 0.57  | 1.02  | 1.02  | 0.47  | 1.55 |
| PRRCQ      | 5588   | NM_006257    | 6225   | -0.12 | 0.68  | 0.41  | -0.39 | 0.08  | -0.42 | 0.06  | 0.44  | 1.05  | 0.97  | -0.73 | 1.55 |
| THBS3      | 7059   | NM_007112    | 6226   | -0.75 | -0.36 | 0.33  | -1.23 | -0.99 | -1.04 | -0.10 | 0.21  | 1.43  | -0.79 | -3.27 | 1.55 |
| NHR49      | 126205 | NM_178011    | 6227   | 0.46  | 1.39  | 1.57  | 0.46  | 1.39  | 1.57  | 0.46  | 1.39  | 1.57  | 3.60  | 1.27  | 1.55 |
| MTMR2      | 8898   | NM_016156    | 6228   | 0.93  | 1.09  | 0.25  | 0.00  | -0.74 | -0.20 | 0.56  | 0.69  | 0.30  | 2.27  | -0.95 | 1.55 |
| C1orf186   | 440712 | NM_001007544 | 6229</ |       |       |       |       |       |       |       |       |       |       |       |      |

|            |        |              |      |       |       |       |       |       |       |       |       |       |       |       |      |      |
|------------|--------|--------------|------|-------|-------|-------|-------|-------|-------|-------|-------|-------|-------|-------|------|------|
| ZBR12      | 22127  | NM_181842    | 6311 | 0.56  | -1.46 | 2.48  | 0.70  | -1.34 | 1.60  | 1.57  | -0.73 | 0.65  | 1.57  | 0.96  | 1.49 |      |
| TC5A2      | 6190   | NM_021728    | 6312 | -1.05 | -0.24 | 0.14  | -1.40 | -1.20 | -0.88 | 0.59  | 0.37  | 0.53  | 1.04  | -1.26 | 1.05 |      |
| SNV4       | 8723   | NM_003794    | 6313 | 3.02  | 0.96  | 0.80  | 0.73  | 0.37  | 0.43  | 1.27  | 0.41  | -0.19 | 1.58  | 1.54  | 1.48 |      |
| PNP11      | 8778   | NM_033109    | 6314 | 1.08  | 0.38  | -0.37 | 1.84  | 0.95  | 1.76  | 0.34  | 1.45  | -0.30 | 1.09  | 4.55  | 1.48 |      |
| Q11        | 12598  | NM_205767    | 6315 | -0.56 | 0.34  | -1.34 | -0.17 | -1.50 | -0.80 | 0.10  | 1.91  | -0.52 | -1.56 | -2.47 | 1.48 |      |
| SR         | 393    | NM_194442    | 6316 | 0.24  | 0.52  | 0.08  | 1.17  | 0.52  | 0.65  | -0.68 | -0.05 | 2.21  | 0.83  | 1.24  | 1.48 |      |
| ASGR2      | 433    | NM_080914    | 6317 | 0.10  | 0.03  | 0.22  | -0.09 | -0.61 | -1.00 | -0.11 | 0.54  | 1.06  | 0.29  | -1.70 | 1.48 |      |
| CG1        | 114335 | NM_033377    | 6318 | 1.55  | 0.66  | -0.01 | -0.38 | -0.12 | 1.10  | 1.21  | 0.61  | -0.34 | 2.19  | 0.60  | 1.48 |      |
| FLU373     | 162387 | NM_031599    | 6319 | 0.51  | 0.41  | -1.01 | -0.80 | -0.40 | 0.99  | -0.40 | 1.05  | 0.99  | 0.99  | 0.99  | 1.48 |      |
| ZNF139     | 57567  | NM_020807    | 6320 | -1.02 | 0.79  | 0.25  | -1.17 | -0.18 | -0.28 | -0.50 | 1.44  | 0.54  | 0.03  | -1.62 | 1.48 |      |
| RHM14      | 10432  | NM_006128    | 6321 | 2.49  | 1.59  | 1.51  | 0.49  | -0.07 | -0.21 | 0.74  | 0.48  | 0.25  | 5.99  | 0.22  | 1.48 |      |
| 140HG      | 1403   | NM_031593    | 6322 | -1.70 | -0.95 | 0.09  | -0.63 | -0.52 | 1.13  | 0.33  | 0.43  | 0.11  | 2.96  | -0.29 | 1.48 |      |
| C18ORF24   | 55909  | NM_017914    | 6323 | -1.18 | -0.95 | -1.06 | -1.78 | -0.45 | -1.16 | 0.47  | 1.51  | 0.44  | -3.20 | -8.89 | 1.48 |      |
| WFS1       | 7466   | NM_060605    | 6324 | 1.61  | -0.09 | 0.88  | -0.53 | 0.30  | -0.17 | 0.78  | 0.05  | 0.65  | 2.40  | -0.39 | 1.48 |      |
| MUC4       | 4385   | NM_138297    | 6325 | 0.87  | 0.51  | 0.28  | 0.49  | 1.94  | 1.08  | 1.85  | -0.21 | -0.17 | 1.66  | 3.52  | 1.47 |      |
| ZNF339     | 58495  | NM_021200    | 6326 | -0.73 | 0.71  | -0.03 | -1.50 | -0.12 | -0.60 | 0.76  | 0.22  | 0.84  | 1.47  | -0.31 | 1.47 |      |
| LOC157567  | 157567 | NM_198401    | 6327 | 1.30  | 0.61  | 0.14  | 0.64  | 0.34  | 0.27  | 0.89  | 0.82  | -0.22 | 0.87  | 2.05  | 0.20 | 1.47 |
| COL3A1     | 1281   | NM_000090    | 6328 | -0.01 | 0.77  | 0.18  | -0.43 | -0.55 | 0.45  | -0.03 | 1.31  | 0.19  | 0.94  | -0.53 | 1.47 |      |
| C18ORF27   | 80737  | NM_025258    | 6329 | 1.43  | 0.49  | -0.21 | 1.95  | 0.77  | 0.06  | 1.06  | 0.40  | 0.03  | 1.72  | 2.78  | 1.47 |      |
| SLC35C1    | 55343  | NM_018389    | 6330 | 0.63  | 0.75  | 0.34  | -0.38 | -0.58 | -0.19 | 0.45  | 0.71  | 0.31  | 1.72  | -1.15 | 1.47 |      |
| SEMA6C     | 10500  | NM_030913    | 6331 | 1.07  | 0.26  | -0.57 | 0.23  | 0.11  | 0.17  | 0.84  | 1.00  | -0.37 | 0.76  | 0.51  | 1.47 |      |
| PN1        | 5300   | NM_000221    | 6332 | 1.58  | 0.83  | -0.11 | 0.60  | 0.83  | 0.75  | 1.15  | 0.76  | -0.44 | 2.30  | 2.18  | 1.47 |      |
| C18ORF12   | 83636  | NM_00101726  | 6333 | 1.98  | 1.74  | 0.11  | 0.15  | 0.73  | 0.18  | 0.99  | 0.53  | -0.05 | 3.83  | 1.07  | 1.47 |      |
| DKFZ761E18 | 91056  | NM_138368    | 6334 | -0.73 | -0.98 | -0.14 | -0.73 | -1.59 | -1.42 | 0.52  | 0.29  | 0.65  | -1.84 | -3.74 | 1.47 |      |
| URPAP1     | 4043   | NM_002137    | 6335 | 0.37  | 0.51  | -0.08 | -1.20 | -0.11 | -0.59 | 0.92  | 0.75  | -0.21 | 0.79  | -1.90 | 1.47 |      |
| PO2        | 5164   | NM_002011    | 6336 | -0.93 | -0.19 | 0.08  | 0.45  | -1.06 | 0.27  | 0.26  | 1.00  | 0.72  | -1.09 | -0.34 | 1.47 |      |
| SAMD4      | 23034  | NM_015589    | 6337 | -1.02 | -0.79 | -0.05 | 0.22  | -0.93 | -1.23 | -0.46 | 0.50  | 1.43  | -1.86 | -1.95 | 1.47 |      |
| ITGAP      | 3680   | NM_002207    | 6338 | -0.77 | -0.80 | -0.35 | -1.20 | -0.75 | -1.10 | 0.74  | 0.09  | 0.64  | -1.92 | -3.06 | 1.47 |      |
| FLJ0212    | 21939  | NM_145028    | 6339 | 0.86  | 0.56  | 0.08  | 0.39  | 0.86  | 1.13  | 0.34  | 0.69  | 0.49  | 2.49  | 0.02  | 1.47 |      |
| FLJ04243   | 133558 | NM_173489    | 6340 | 0.40  | -0.25 | 0.02  | 0.53  | 1.21  | 1.53  | 1.50  | -0.30 | 0.26  | 1.38  | 0.28  | 1.47 |      |
| FLJ38596   | 644809 | NM_00139905  | 6341 | 0.41  | 0.55  | -1.05 | -0.49 | -0.45 | -0.52 | 1.22  | 1.04  | -0.80 | -0.09 | -1.47 | 1.47 |      |
| 5740A14    | 57400  | NM_031672    | 6342 | 0.70  | -0.15 | 0.23  | -0.62 | 0.14  | -0.23 | 0.14  | -0.22 | 0.56  | 0.77  | -0.18 | 1.47 |      |
| RAB18      | 22931  | NM_021252    | 6343 | 1.28  | 0.49  | -0.07 | -0.49 | -0.54 | -0.01 | -0.06 | 1.64  | -0.11 | 0.14  | 1.04  | 1.47 |      |
| PC5        | 1431   | NM_004077    | 6344 | 1.13  | -0.15 | -0.15 | -0.75 | -0.58 | -1.07 | 0.95  | 0.00  | 0.51  | 0.83  | -2.40 | 1.47 |      |
| PHAC3      | 84890  | NM_019259    | 6345 | -0.56 | -0.73 | 0.34  | -0.44 | -1.04 | -0.04 | 0.51  | 0.44  | 0.51  | -0.84 | -1.52 | 1.47 |      |
| SNAP       | 965    | NM_004647    | 6346 | 0.20  | 0.56  | 0.02  | 0.85  | 0.21  | 0.80  | 0.25  | 0.44  | 0.24  | 0.84  | 1.20  | 1.46 |      |
| MGC71745   | 133418 | NM_198449    | 6347 | 0.40  | -0.72 | 0.76  | -0.30 | -0.98 | -0.23 | 0.44  | 0.07  | 0.96  | 0.44  | -1.51 | 1.46 |      |
| TRPM3      | 80036  | NM_206948    | 6348 | -0.70 | -0.26 | -0.04 | -0.81 | -1.12 | -0.58 | -0.18 | 1.15  | 0.50  | -1.00 | -2.50 | 1.46 |      |
| TRPM9      | 2385   | NM_001072    | 6349 | 0.19  | 0.03  | 0.08  | 0.33  | 0.19  | 0.33  | 0.19  | 0.37  | 0.61  | 0.69  | 0.02  | 1.46 |      |
| WD67       | 93394  | NM_145647    | 6350 | -0.19 | 1.66  | 0.31  | -0.33 | 0.89  | 0.83  | 0.47  | 1.30  | -0.31 | 2.16  | 1.39  | 1.46 |      |
| YTHDF3     | 253943 | NM_152758    | 6351 | 0.36  | 0.81  | 0.89  | -0.50 | -0.33 | 0.14  | -0.18 | 0.95  | 0.69  | 1.35  | -0.69 | 1.46 |      |
| RNAAD071   | 23870  | NM_0203847   | 6352 | 0.18  | 0.87  | 0.10  | 0.62  | 0.62  | 0.49  | 0.58  | 0.50  | 0.69  | 1.29  | 0.87  | 1.46 |      |
| DDX21      | 9188   | NM_004728    | 6353 | 0.02  | 0.02  | -0.08 | -0.44 | 0.16  | 0.78  | 0.70  | 0.52  | 0.24  | 0.80  | 0.49  | 1.46 |      |
| ZFP106     | 64397  | NM_022473    | 6354 | 0.74  | -0.28 | 0.98  | -0.32 | 0.09  | -0.18 | 0.97  | -0.32 | 0.81  | 1.44  | -0.41 | 1.46 |      |
| FLJ30707   | 220108 | NM_145019    | 6355 | 0.53  | 0.36  | 0.29  | 0.14  | 0.05  | -0.13 | 0.48  | 0.30  | 0.68  | 1.38  | 0.07  | 1.46 |      |
| PGR2       | 26702  | NM_001017434 | 6356 | 0.52  | -1.18 | 0.71  | 0.28  | 0.14  | 0.18  | 0.78  | 0.16  | 2.21  | 0.49  | 0.28  | 1.46 |      |
| LOC134492  | 134492 | NM_145266    | 6357 | 2.79  | 0.63  | 0.75  | -0.42 | -0.02 | 0.86  | 1.73  | 0.01  | -0.29 | 4.17  | 0.41  | 1.46 |      |
| CTF45-4    | 441520 | NM_001017436 | 6358 | -0.42 | -0.33 | -0.05 | -0.93 | 0.09  | -0.49 | 0.94  | -0.15 | 0.67  | -0.80 | -1.33 | 1.46 |      |
| ZNF4       | 140836 | NM_031710    | 6359 | 1.23  | 1.47  | 1.27  | 0.47  | 0.44  | 1.42  | 1.47  | 1.45  | 1.45  | 1.45  | 1.45  | 1.46 |      |
| DGCR6      | 8214   | NM_005675    | 6360 | 0.52  | 0.92  | 0.16  | 0.33  | 0.15  | -0.20 | -0.01 | 0.69  | 0.78  | 1.59  | 0.28  | 1.46 |      |
| CMY2       | 1160   | NM_001825    | 6361 | 0.27  | -0.11 | -0.87 | -0.83 | -0.85 | -0.98 | 0.67  | 0.77  | 0.01  | 0.71  | -2.66 | 1.45 |      |
| RBM2       | 34250  | NM_030489    | 6362 | 0.31  | -0.04 | 0.89  | -0.63 | -0.27 | -0.78 | 0.64  | -0.19 | 1.45  | -0.08 | -1.00 | 1.45 |      |
| BKDNH8     | 994    | NM_000056    | 6363 | -0.37 | 0.99  | 0.41  | 0.37  | 0.06  | -0.78 | -0.21 | 1.27  | 0.39  | 0.21  | -0.35 | 1.45 |      |
| BAZ2B      | 29994  | NM_013450    | 6364 | 6.82  | 1.01  | 5.84  | 4.48  | 3.24  | 4.30  | 0.38  | 0.52  | 0.56  | 22.77 | 12.01 | 1.45 |      |
| APBB2      | 423    | NM_173075    | 6365 | 0.47  | 0.63  | 0.15  | -0.09 | -0.37 | -0.23 | 0.82  | 0.09  | 0.55  | 1.25  | -0.69 | 1.45 |      |
| APRR1      | 15153  | NM_152792    | 6366 | 0.55  | 0.06  | 0.71  | 0.61  | 0.34  | 0.47  | 0.62  | 0.54  | 0.67  | 1.31  | 1.56  | 1.45 |      |
| LOC128160  | 128160 | NM_005428    | 6367 | 0.05  | 0.79  | 0.65  | -0.04 | -0.08 | -0.20 | -0.08 | 0.65  | 0.88  | 1.48  | -0.33 | 1.45 |      |
| AV1        | 7409   | NM_002478    | 6368 | 0.32  | 0.37  | 0.39  | -0.63 | -0.81 | -0.64 | 0.45  | 0.40  | 0.60  | 1.08  | -2.08 | 1.45 |      |
| SNRPA3     | 7360   | NM_03010321  | 6369 | 1.08  | 1.14  | 1.11  | 0.60  | 0.62  | 0.49  | 0.80  | 0.53  | 1.42  | 1.72  | 1.76  | 1.45 |      |
| ACTP       | 93650  | NM_080791    | 6370 | 0.41  | 0.24  | 0.70  | 0.46  | -0.52 | -0.22 | -0.10 | 0.76  | 0.79  | 1.35  | -0.27 | 1.45 |      |
| KMA1822    | 84439  | NM_032425    | 6371 | 0.42  | 0.72  | 1.57  | -0.47 | -0.61 | -0.10 | 0.18  | 0.65  | 0.61  | 2.71  | -1.18 | 1.45 |      |
| SMPD3A     | 10926  | NM_020714    | 6372 | 1.66  | 1.16  | 0.70  | 0.60  | 0.62  | 0.49  | 0.58  | 0.50  | 0.69  | 3.31  | 1.75  | 1.45 |      |
| MY1        | 4633   | NM_000432    | 6373 | 0.38  | 0.86  | 0.79  | 0.54  | 0.64  | 0.79  | 0.58  | 0.48  | 0.38  | 2.03  | 1.97  | 1.45 |      |
| MY2        | 10897  | NM_020470    | 6374 | -0.98 | -0.63 | -0.98 | -1.35 | -0.86 | -1.44 | 0.27  | 0.29  | 0.88  | -2.59 | -3.65 | 1.45 |      |
| BAT2       | 7916   | NM_004538    | 6375 | -0.84 | -0.87 | -0.42 | -1.59 | -1.84 | -1.40 | 0.21  | 0.73  | 0.51  | -1.23 | -4.84 | 1.45 |      |
| SNRMB9     | 8174   | NM_00100545  | 6376 | 0.74  | 0.45  | 0.44  | 0.24  | -0.64 | -0.44 | 0.24  | 0.64  | 0.44  | 0.69  | 0.07  | 1.45 |      |
| C18ORF143  | 90141  | NM_145231    | 6377 | 1.37  | 1.85  | 0.37  | 1.18  | 0.97  | 1.22  | 0.34  | 0.81  | 0.29  | 3.58  | 2.36  | 1.44 |      |
| POU4F2     | 5458   | NM_004575    | 6378 | 0.78  | -0.56 | -0.78 | -1.25 | -1.20 | -1.38 | 1.34  | 0.06  | 0.16  | -0.56 | -3.83 | 1.44 |      |
| LOC121159  | 7984   | NM_001039580 | 6379 | 0.50  | -0.20 | 0.32  | 0.59  | 0.29  | 0.89  | 0.69  | 0.89  | 0.69  | 0.69  | 0.69  | 1.44 |      |
| KMA1724    | 85405  | NM_033505    | 6380 | 1.55  | 0.81  | 0.67  | 0.37  | 0.96  | 0.39  | 0.85  | 0.66  | -0.06 | 3.04  | 1.72  | 1.44 |      |
| FLJ3143    | 155061 | NM_152557    | 6381 | 1.31  | -0.05 | 0.36  | -0.41 | -1.57 | -0.87 | 0.77  | 0.49  | 0.18  | 1.62  | -2.85 | 1.44 |      |
| TRM2       | 3982   | NM_030657    | 6382 | 0.44  | -0.35 | 1.34  | -0.62 | -0.29 | -0.37 | 0.64  | -0.37 | 1.02  | 1.47  | -1.12 | 1.44 |      |
| BKDNH3     | 994    | NM_000056    | 6383 | 0.33  | -0.36 | 0.19  | -1.05 | -0.64 | -0.36 | 1.36  | 0.17  | 0.09  | 0.17  | -1.34 | 1.44 |      |
| TRM3       | 3982   | NM_030657    | 6384 | 2.62  | 1.69  | 1.92  | 0.98  | 0.23  | 0.62  | 0.58  | 0.45  | 0.41  | 6.23  | 1.82  | 1.44 |      |
| CLC        | 23529  | NM_013246    | 6385 | -0.28 | 0.02  | 0.10  | 0.32  | -0.44 | -0.28 | 0.47  | 0.20  | 0.77  | -0.17 | -0.40 | 1.44 |      |
| LOC64948   | 64948  | NM_001005228 | 6386 | 0.49  | 0.04  | 0.19  | 0.79  | 0.64  | 0.75  | 0.62  | 0.75  | 0.62  | 0.52  | 0.48  | 1.44 |      |
| C18ORF73   | 91828  | NM_00107594  | 6387 | 1.71  | 0.45  | 0.96  | 0.39  | -0.16 | 0.28  | 0.69  | 0.41  | 0.34  | 3.12  | 0.51  | 1.44 |      |
| AAAT1      | 15     | NM_001088    | 6388 | 1.32  | 0.18  | 1.41  | -0.28 | 0.28  | 1.34  | 1.26  | 0.05  | 0.12  | 2.91  | 1.34  | 1.44 |      |
| KMA1811    | 8454   | NM_031056    | 6389 | 1.50  | 1.33  | 1.33  | 1.50  | 1.33  | 1.33  | 1.50  | 1.33  | 1.33  | 2.11  | 1.56  | 1.44 |      |
| MAT1A      | 4143   | NM_000429    | 6390 | -0.48 | 0.68  | -0.18 | -1.24 | -1.02 | -1.14 | 0.61  | 1.10  | -0.28 | 0.02  | -2.40 | 1.44 |      |
| TARAB      | 83551  |              |      |       |       |       |       |       |       |       |       |       |       |       |      |      |



|             |        |               |      |       |       |       |       |       |       |       |       |       |       |       |       |
|-------------|--------|---------------|------|-------|-------|-------|-------|-------|-------|-------|-------|-------|-------|-------|-------|
| SCN7A       | 6332   | NMM_002976    | 6473 | -0.04 | 0.87  | 0.71  | 0.45  | 0.03  | -0.17 | -0.37 | 0.61  | 1.15  | 1.53  | 0.31  | 1.39  |
| FL20489     | 5582   | NMM_001942    | 6474 | -0.36 | -0.68 | -0.41 | -0.77 | 0.80  | -1.11 | 0.79  | -0.11 | 0.98  | -1.14 | -1.11 | -0.78 |
| FL20485     | 54517  | NMM_015042    | 6475 | 0.10  | 0.34  | 0.07  | -0.50 | -0.83 | -0.30 | 0.15  | 1.03  | 0.21  | 0.17  | -1.69 | 1.38  |
| LOC148137   | 148137 | NMM_001039887 | 6476 | -0.80 | 1.05  | -0.31 | -0.99 | -0.80 | -0.43 | 0.09  | 1.09  | 0.20  | -0.05 | -2.22 | 1.38  |
| MM2C        | 9902   | NMM_006039    | 6477 | 0.52  | 0.27  | 0.32  | -0.17 | -0.07 | 0.42  | 0.81  | 0.56  | 0.01  | 1.12  | 0.17  | 1.38  |
| MMF6        | 6049   | NMM_001045    | 6478 | 0.04  | 0.04  | 0.12  | 0.16  | 0.02  | 0.46  | 0.08  | 0.72  | 0.16  | 1.08  | 1.43  | 1.38  |
| APLN        | 8862   | NMM_017413    | 6479 | -0.51 | 0.59  | 0.29  | -0.39 | 0.22  | -0.30 | 0.08  | 0.48  | 0.82  | 0.36  | -0.47 | 1.38  |
| HPF27       | 79577  | NMM_024529    | 6480 | 0.35  | -0.46 | -0.71 | 0.11  | -0.72 | -0.92 | 0.62  | 0.28  | 0.48  | -1.52 | -1.53 | 1.38  |
| PMF93       | 582    | NMM_003318    | 6481 | 1.57  | 0.45  | 0.44  | 0.51  | 0.72  | 1.15  | 0.45  | 4.44  | 1.57  | 17.76 | 15.42 | 1.38  |
| CBR3        | 874    | NMM_001236    | 6482 | -1.16 | 0.19  | 0.84  | 0.96  | -0.14 | 0.23  | 0.36  | 0.11  | 0.91  | 2.19  | 1.05  | 1.38  |
| C10RF9      | 51430  | NMM_014283    | 6483 | 1.33  | 0.81  | 0.15  | 0.24  | 0.55  | 0.15  | 0.87  | 0.64  | -0.13 | 2.29  | 0.93  | 1.38  |
| NMFI501     | 44087  | NMM_001484    | 6484 | 0.17  | 0.84  | 0.60  | 0.40  | 0.30  | 1.04  | 0.08  | 0.20  | 0.16  | 2.62  | 1.46  | 1.38  |
| STAR08      | 9754   | NMM_014725    | 6485 | -1.00 | 0.07  | 0.01  | -0.71 | -0.12 | -0.91 | 0.66  | -0.29 | 1.00  | -0.10 | -1.74 | 1.38  |
| NME1-NME2   | 654364 | NMM_001018136 | 6486 | 1.57  | 0.39  | 0.05  | 0.80  | 1.07  | 0.10  | 0.55  | -0.28 | 1.11  | 2.01  | 1.97  | 1.38  |
| CRB3        | 92559  | NMM_174881    | 6487 | -0.72 | -0.69 | -0.94 | -1.81 | -0.99 | -1.79 | 0.44  | 0.41  | 0.52  | -2.34 | -4.53 | 1.38  |
| FL2936      | 3656   | NMM_001568    | 6488 | 0.26  | 0.26  | 0.53  | 0.33  | 0.07  | -0.83 | 0.67  | -0.12 | 0.81  | 0.63  | -0.43 | 1.38  |
| C210RF57    | 54059  | NMM_058181    | 6489 | 1.52  | 0.65  | 0.54  | -0.14 | 0.76  | -0.26 | 1.07  | -0.09 | 0.40  | 2.71  | 0.36  | 1.38  |
| COG3        | 83548  | NMM_031491    | 6490 | 1.23  | 0.44  | 0.68  | -0.18 | -0.23 | 0.40  | 0.89  | 0.33  | 0.15  | 2.35  | -0.01 | 1.38  |
| FL29375     | 280630 | NMM_001234668 | 6491 | 1.15  | 0.65  | -0.16 | -0.12 | -0.15 | -0.12 | 0.83  | 0.76  | -0.22 | 1.64  | 0.38  | 1.38  |
| NUCK5       | 64710  | NMM_002731    | 6492 | -0.29 | 0.13  | 0.24  | -0.92 | -0.44 | -0.40 | 0.40  | 0.27  | 0.71  | 0.08  | -1.75 | 1.38  |
| ACB3        | 64746  | NMM_022735    | 6493 | 1.64  | 1.03  | 0.68  | 0.37  | 0.82  | 0.00  | 0.39  | 0.55  | 0.43  | 3.35  | 1.19  | 1.38  |
| HP51        | 3257   | NMM_002839    | 6494 | 1.15  | 0.17  | 0.59  | 1.09  | -0.47 | 1.18  | 1.50  | 0.29  | -0.41 | 1.90  | 1.75  | 1.38  |
| ZNF285      | 26974  | NMM_152354    | 6495 | 0.61  | 0.16  | 0.35  | 0.06  | -0.31 | -0.08 | 0.70  | 0.14  | 0.54  | 1.12  | -0.33 | 1.38  |
| C10ORF99    | 387695 | NMM_207373    | 6496 | 0.31  | 0.83  | 0.21  | -0.59 | 0.95  | -0.52 | 0.44  | 0.13  | 0.81  | 1.35  | -0.16 | 1.38  |
| FDK1        | 2230   | NMM_004109    | 6497 | 0.78  | 0.33  | 0.99  | 0.55  | -0.21 | -0.43 | 0.31  | 0.09  | 0.97  | 2.10  | -0.09 | 1.38  |
| DFR107A     | 245910 | NMM_001037668 | 6498 | -0.39 | 0.91  | 0.38  | 1.91  | 0.68  | 0.62  | 0.66  | 1.30  | 0.74  | 0.70  | 3.21  | 1.37  |
| UTRN        | 7402   | NMM_007124    | 6499 | 0.42  | 0.39  | 0.62  | -1.59 | -0.67 | -0.71 | 0.79  | 0.22  | 0.36  | 1.43  | -2.96 | 1.37  |
| ZNF263      | 10127  | NMM_005741    | 6500 | 0.35  | 0.24  | 0.38  | -0.35 | 0.12  | -0.59 | 0.50  | -0.09 | 0.96  | 0.97  | -0.83 | 1.37  |
| CGOR15      | 2911   | NMM_014070    | 6501 | 0.09  | 0.28  | 0.08  | 0.26  | 0.07  | -0.19 | 0.49  | 0.07  | 0.48  | -0.27 | 0.93  | 1.37  |
| MVO3A       | 53904  | NMM_017433    | 6502 | 0.21  | 0.27  | 0.32  | -0.71 | -0.72 | -0.52 | 0.60  | 0.43  | 0.34  | 0.79  | -1.94 | 1.37  |
| LOC285193   | 285193 | NMM_001033075 | 6503 | 1.64  | 0.48  | 2.20  | 0.42  | -0.37 | 1.03  | 0.79  | 0.27  | 0.32  | 4.32  | 1.08  | 1.37  |
| C10ORF10    | 2594   | NMM_001475    | 6504 | 0.25  | -0.24 | -0.58 | -0.54 | -0.40 | -0.38 | -1.40 | -0.25 | -0.41 | -1.11 | -0.80 | 1.37  |
| SLC22A16    | 85413  | NMM_033125    | 6505 | 0.48  | 1.00  | -0.06 | -0.17 | -0.69 | -0.16 | 0.18  | 1.32  | -0.13 | -1.40 | -1.02 | 1.37  |
| RMF113A     | 7737   | NMM_006978    | 6506 | 0.85  | -0.38 | -1.46 | -2.62 | -2.40 | -2.70 | 0.62  | 0.70  | 0.05  | -1.00 | -7.72 | 1.37  |
| SPRY4       | 81848  | NMM_120894    | 6507 | 0.72  | -0.31 | 0.99  | -1.33 | -1.27 | -1.04 | 0.13  | 0.69  | 0.55  | 0.81  | -0.64 | 1.37  |
| PTF1        | 8032   | NMM_172028    | 6508 | 0.23  | 0.64  | 0.77  | 0.64  | 0.24  | 0.47  | 0.04  | 0.49  | 0.84  | 1.64  | 0.97  | 1.37  |
| LOC4549     | 84549  | NMM_032509    | 6509 | -0.54 | -1.08 | -0.92 | -1.32 | -2.43 | -1.11 | 0.45  | 1.00  | -0.09 | -2.54 | -4.86 | 1.37  |
| PPP4R2      | 151987 | NMM_174907    | 6510 | -0.59 | -0.65 | -0.93 | -1.14 | -1.61 | -1.29 | 0.90  | 0.65  | -0.19 | -2.38 | -4.43 | 1.37  |
| HP17        | 5714   | NMM_001567    | 6511 | -0.57 | 0.69  | 0.62  | -1.07 | -0.68 | -0.99 | 0.49  | 0.28  | 0.17  | 1.06  | 0.67  | 1.37  |
| MMPRBP1     | 10226  | NMM_005817    | 6512 | 0.42  | 1.48  | 0.89  | -0.10 | 0.01  | 1.78  | 0.27  | 1.40  | -0.31 | 2.79  | 1.69  | 1.36  |
| LOC65243    | 65243  | NMM_023070    | 6513 | -0.44 | -0.80 | 0.48  | -0.46 | -1.11 | -0.43 | -0.22 | 0.67  | 0.91  | -0.76 | -2.00 | 1.36  |
| PHD         | 5481   | NMM_003038    | 6514 | 0.63  | 0.12  | 0.35  | -0.68 | -0.41 | 0.25  | 0.48  | 0.15  | 0.58  | -1.41 | 0.40  | 1.36  |
| RPL17       | 6139   | NMM_001035006 | 6515 | 1.62  | 0.82  | -1.33 | -1.10 | -2.77 | -2.64 | -0.33 | 1.18  | 0.51  | 3.76  | 4.51  | 1.36  |
| YFPM1       | 56252  | NMM_019589    | 6516 | 0.03  | -0.11 | -0.12 | 0.36  | 0.18  | -0.05 | 0.00  | 1.11  | 0.26  | -0.19 | 0.49  | 1.36  |
| ACADM       | 34     | NMM_000616    | 6517 | 0.90  | 0.89  | -0.33 | 0.00  | 0.00  | -0.42 | 0.69  | 0.69  | -0.02 | 1.46  | -0.41 | 1.36  |
| 52B         | 529    | NMM_005027    | 6518 | -0.57 | -1.48 | -1.43 | -2.11 | -0.43 | -2.14 | -0.49 | 0.88  | 0.24  | -0.68 | -0.98 | 1.36  |
| NRL         | 4901   | NMM_006177    | 6519 | -0.92 | 5.79  | -0.77 | -0.88 | 0.74  | -0.70 | -0.30 | 1.33  | 0.33  | 4.11  | -0.83 | 1.36  |
| PRPH        | 5630   | NMM_006262    | 6520 | 0.05  | 1.21  | 0.06  | -0.55 | 0.27  | 0.08  | 0.01  | 1.08  | 0.26  | 1.31  | -0.22 | 1.36  |
| PLAG2B      | 23174  | NMM_015144    | 6521 | 1.39  | 0.63  | 0.63  | -1.30 | 0.23  | 0.63  | 0.20  | 0.23  | 0.63  | 1.01  | 0.24  | 1.36  |
| PLAG2A      | 8399   | NMM_003561    | 6522 | 0.99  | 0.58  | 0.14  | -0.26 | -0.61 | 0.15  | 0.46  | 0.96  | -0.07 | 1.71  | -0.72 | 1.36  |
| SLC26A6     | 65010  | NMM_134426    | 6523 | 0.21  | 0.40  | -0.48 | 0.03  | -0.26 | 0.41  | 1.05  | 0.32  | -0.02 | 0.13  | 0.17  | 1.36  |
| CHRN10      | 147    | NMM_001039    | 6524 | 0.09  | 0.18  | 0.09  | -0.57 | -0.94 | -0.62 | 0.17  | 0.04  | 0.11  | 0.58  | -0.03 | 1.36  |
| POU1F1      | 5449   | NMM_000036    | 6525 | 2.54  | 0.85  | 0.23  | 0.38  | 0.05  | 0.30  | 1.02  | 0.44  | -0.10 | 3.62  | 0.12  | 1.36  |
| FLI4959     | 284391 | NMM_001136501 | 6526 | 0.17  | 0.07  | 0.96  | 0.62  | -0.18 | -0.08 | 0.76  | 0.11  | 0.49  | 1.19  | 0.52  | 1.36  |
| ZNF613      | 79898  | NMM_024840    | 6527 | -0.53 | 1.75  | 0.69  | 0.58  | 0.15  | -0.14 | -0.56 | 1.40  | 0.51  | 1.91  | 0.60  | 1.36  |
| SLC26A5     | 2997   | NMM_216651    | 6528 | 1.06  | 0.36  | 0.26  | 0.12  | 0.44  | 0.47  | 1.44  | 0.44  | 0.61  | 0.45  | 1.35  | 1.35  |
| IFG2        | 84140  | NMM_170681    | 6529 | -0.24 | -1.17 | 0.69  | -0.81 | -0.39 | 1.13  | 0.68  | -0.81 | 1.48  | -0.72 | -1.07 | 1.35  |
| OSP3        | 120066 | NMM_153445    | 6530 | -0.12 | -0.20 | -0.43 | -0.70 | -0.52 | -0.59 | 0.76  | 0.09  | 0.50  | -0.75 | -1.81 | 1.35  |
| CORF80      | 5849   | NMM_021218    | 6531 | 1.29  | 1.45  | 0.53  | 1.29  | 1.45  | 0.53  | 1.29  | 1.45  | 0.53  | 2.99  | 1.51  | 1.35  |
| CORF134     | 79969  | NMM_024909    | 6532 | 1.69  | 1.69  | 1.27  | 1.59  | 0.38  | 0.01  | -0.20 | 0.87  | 0.69  | 4.64  | 1.98  | 1.35  |
| BAGALN13    | 283358 | NMM_173993    | 6533 | 0.59  | 0.60  | -0.29 | -0.90 | -0.34 | -1.12 | 0.79  | 0.21  | 0.35  | 0.90  | -2.36 | 1.35  |
| DT1         | 1849   | NMM_004416    | 6534 | 1.89  | 8.37  | 1.66  | 4.61  | 1.50  | 1.82  | 0.61  | 1.57  | 1.86  | 16.71 | 9.96  | 1.35  |
| CORF62      | 81888  | NMM_030939    | 6535 | -0.07 | 0.69  | -0.07 | -0.46 | -0.66 | -0.32 | 0.45  | 1.78  | 0.03  | 0.04  | -1.25 | 1.35  |
| CD34        | 997    | NMM_004359    | 6536 | -0.52 | 0.19  | -0.45 | -0.37 | -0.57 | -0.31 | -0.07 | 1.42  | 0.00  | -1.16 | -1.26 | 1.35  |
| SPNLU1      | 57139  | NMM_020398    | 6537 | 1.23  | 0.52  | 0.03  | -0.37 | -0.05 | -0.24 | 0.94  | -0.01 | 0.42  | 1.78  | -0.66 | 1.35  |
| PC4         | 415    | NMM_002746    | 6538 | 0.49  | 0.66  | 0.34  | 0.04  | 0.66  | 0.58  | 0.09  | 1.59  | 0.62  | 0.51  | 0.12  | 1.35  |
| PE14        | 5195   | NMM_004565    | 6539 | 2.47  | 1.58  | 1.70  | 1.25  | 2.51  | 1.01  | 0.69  | -0.15 | 0.82  | 5.75  | 4.77  | 1.35  |
| MC4R        | 4160   | NMM_005912    | 6540 | 1.00  | 5.19  | 2.72  | 1.76  | 1.88  | 2.27  | 0.34  | 0.88  | 0.12  | 12.01 | 5.91  | 1.35  |
| CBR39A1     | 38954  | NMM_00103808  | 6541 | 1.05  | 0.90  | 0.48  | 0.67  | 0.50  | 0.48  | 0.67  | 0.36  | 0.81  | 3.42  | 0.53  | 1.35  |
| MGC34761    | 283971 | NMM_173619    | 6542 | 1.48  | 0.38  | 1.08  | 1.11  | -0.04 | 0.83  | 0.82  | 0.40  | 0.13  | 2.94  | 1.90  | 1.35  |
| SLC36A1     | 206358 | NMM_078483    | 6543 | 0.14  | -0.06 | -0.13 | -1.19 | -1.00 | -0.64 | 0.67  | 0.82  | -0.14 | -0.05 | -2.83 | 1.35  |
| PPI1        | 5354   | NMM_001478    | 6544 | 2.08  | 1.45  | 1.12  | 1.45  | 1.30  | 1.45  | 1.30  | 1.45  | 1.12  | 3.86  | 1.52  | 1.35  |
| KIAA134     | 56261  | NMM_019593    | 6545 | 1.16  | 1.09  | 0.97  | 0.71  | 1.13  | 0.05  | 0.16  | 0.39  | 0.80  | 3.21  | 1.89  | 1.35  |
| FLI2660     | 148109 | NMM_152481    | 6546 | 1.13  | 0.93  | 1.02  | 0.74  | -0.50 | 0.19  | 0.02  | 0.45  | 0.87  | 3.08  | 0.43  | 1.35  |
| LR10        | 80262  | NMM_025187    | 6547 | 1.78  | 1.97  | 0.20  | 1.14  | 0.12  | 0.12  | 0.43  | 1.31  | -0.39 | 3.95  | 1.58  | 1.35  |
| DKFZP564A12 | 25979  | NMM_014043    | 6548 | 1.06  | 1.38  | 1.32  | 1.06  | 1.38  | 1.32  | 1.06  | 1.38  | 1.32  | 4.76  | 2.32  | 1.34  |
| LOC23A1     | 91522  | NMM_173465    | 6549 | 0.22  | 0.08  | 1.33  | 1.07  | 1.01  | 0.10  | -0.31 | -0.30 | 1.96  | 1.63  | 2.19  | 1.34  |
| KRC5        | 7520   | NMM_021141    | 6550 | 0.19  | -0.37 | -0.65 | 1.21  | -0.18 | -0.12 | 1.06  | 0.34  | -0.05 | -0.82 | 0.91  | 1.34  |
| KIAA13A     | 2332   | NMM_014423    | 6551 | 0.39  | 0.04  | 0.23  | 0.36  | 0.45  | 0.12  | 0.02  | 0.45  | 0.11  | 0.01  | 0.11  | 1.34  |
| SMARCB1     | 6598   | NMM_001007468 | 6552 | 0.38  | 1.80  | 0.09  | -0.42 | -0.45 | -0.48 | -0.07 | 1.08  | 0.33  | 2.28  | 1.14  | 1.34  |
| OR2B6       | 3      |               |      |       |       |       |       |       |       |       |       |       |       |       |       |

|             |        |              |      |       |       |       |       |       |       |       |       |       |       |       |      |
|-------------|--------|--------------|------|-------|-------|-------|-------|-------|-------|-------|-------|-------|-------|-------|------|
| KMA1754     | 85490  | NM_033397    | 6635 | -0.19 | -0.21 | 0.27  | -0.88 | -0.72 | -0.71 | 0.49  | 0.18  | 0.63  | -0.13 | -2.31 | 1.29 |
| FL38348     | 25285  | NM_010281    | 6636 | 0.08  | 0.10  | 0.80  | 0.41  | -0.12 | -0.14 | 0.33  | 0.14  | 0.61  | -0.14 | -0.23 | 1.60 |
| GC01        | 8521   | NM_003643    | 6637 | 0.59  | 1.34  | -0.08 | 0.09  | 0.72  | 0.08  | 0.78  | 0.63  | -0.12 | 3.84  | 0.89  | 1.29 |
| FLU12666    | 79647  | NM_024595    | 6638 | 3.31  | 2.56  | 2.16  | 1.97  | 0.38  | 2.43  | 0.53  | 0.94  | -0.18 | 8.04  | 4.79  | 1.29 |
| CTDP1       | 9150   | NM_048368    | 6639 | -0.61 | -0.63 | -1.08 | -1.71 | -2.11 | -1.89 | 0.67  | 0.56  | 0.06  | -2.30 | -5.71 | 1.29 |
| MOV10       | 4381   | NM_000361    | 6640 | 0.00  | 0.00  | 0.12  | 0.60  | -0.02 | -0.42 | 0.84  | -0.02 | 0.89  | 0.09  | 0.02  | 0.29 |
| SATL1       | 340562 | NM_00101280  | 6641 | 0.38  | 1.47  | 1.78  | 0.27  | 0.29  | 0.36  | 0.52  | 0.57  | 0.20  | 3.62  | 0.92  | 1.29 |
| DOC         | 1644   | NM_000790    | 6642 | 0.12  | 0.39  | 0.01  | 0.35  | -0.22 | -0.14 | -0.26 | 1.12  | 0.41  | 0.51  | -0.01 | 1.29 |
| SP1         | 3927   | NM_005148    | 6643 | 0.15  | 0.15  | 0.08  | 0.08  | 0.39  | 0.39  | -0.48 | 0.39  | 0.49  | 0.80  | 1.47  | 1.29 |
| CALR2       | 794    | NM_007088    | 6644 | -0.74 | -1.03 | -1.06 | -1.37 | -1.70 | -1.71 | 0.65  | 0.26  | 0.38  | -2.84 | -4.78 | 1.28 |
| BM039       | 55839  | NM_018455    | 6645 | 3.76  | 5.48  | 4.33  | 4.41  | 1.46  | 1.36  | 0.04  | 0.51  | 0.74  | 13.57 | 7.24  | 1.28 |
| NMG0200     | 10380  | NM_000520    | 6646 | 0.51  | 0.46  | 0.01  | 0.51  | -0.15 | -0.44 | 0.51  | 1.34  | 0.20  | 1.30  | 0.71  | 1.28 |
| ARSA        | 410    | NM_000487    | 6647 | 0.10  | 0.38  | 0.27  | -0.32 | -0.56 | -0.09 | 0.30  | 0.85  | 0.14  | 0.75  | 0.96  | 1.28 |
| GAA         | 2548   | NM_000152    | 6648 | 0.81  | 0.63  | 2.14  | -0.70 | 0.49  | 0.71  | 1.01  | 1.00  | 0.38  | 3.59  | 0.50  | 1.28 |
| RM29        | 84173  | NM_032213    | 6649 | 0.89  | 0.99  | 0.11  | -0.93 | -0.05 | -0.93 | 0.61  | 0.57  | 0.11  | 1.50  | -1.32 | 1.28 |
| SFR57       | 6482   | NM_00101684  | 6650 | -0.55 | -0.44 | -0.87 | -1.21 | -1.17 | -1.10 | 1.08  | 0.05  | 0.15  | 0.98  | 2.15  | 1.28 |
| PRKWNK3     | 65267  | NM_00100288  | 6651 | 0.31  | 0.11  | 0.23  | -0.13 | 0.02  | 0.25  | 1.30  | -0.13 | 0.11  | 0.65  | 0.14  | 1.28 |
| ZNF354C     | 30832  | NM_014594    | 6652 | 1.39  | 1.04  | -0.43 | 0.14  | -0.39 | -0.74 | 0.50  | 1.06  | -0.28 | 2.00  | -1.00 | 1.28 |
| NHP92       | 54602  | NM_019080    | 6653 | -0.46 | -0.11 | 0.96  | -0.48 | -0.79 | -0.68 | -0.27 | 0.29  | 1.28  | 0.38  | 1.95  | 1.28 |
| CALM3       | 808    | NM_005184    | 6654 | 3.00  | 1.47  | 3.46  | 1.45  | 1.46  | 2.65  | 0.43  | 0.19  | 0.66  | 7.93  | 5.56  | 1.28 |
| PPM11       | 151742 | NM_139245    | 6655 | 1.91  | 3.72  | 0.17  | 1.06  | 1.83  | 0.57  | 0.66  | 1.05  | -0.44 | 5.81  | 3.47  | 1.28 |
| ADM2        | 79924  | NM_024866    | 6656 | 0.64  | -0.07 | -0.39 | -0.55 | -0.81 | -0.74 | 0.59  | 0.57  | 0.11  | 0.17  | -0.11 | 1.28 |
| CDR1        | 1038   | NM_004065    | 6657 | 0.01  | 1.10  | 0.26  | -0.30 | 0.11  | 0.32  | 0.00  | 1.04  | 0.24  | 1.37  | 0.13  | 1.28 |
| KIF15       | 56992  | NM_020242    | 6658 | 1.27  | 0.45  | 0.28  | -0.13 | -0.03 | -0.11 | 0.72  | 0.59  | -0.04 | 2.00  | -0.06 | 1.28 |
| FAM19A1     | 407738 | NM_213409    | 6659 | 0.01  | 0.26  | 1.58  | -0.48 | -0.16 | -0.03 | -0.27 | -0.08 | 1.63  | 1.85  | -0.66 | 1.27 |
| ATP8B1      | 5202   | NM_005603    | 6660 | 0.68  | 1.16  | 0.54  | 0.28  | 0.01  | 0.02  | 0.28  | 0.64  | 0.95  | 2.38  | 0.30  | 1.27 |
| KDLR1       | 10945  | NM_006801    | 6661 | 0.29  | 1.18  | 0.29  | -0.01 | -0.50 | -0.56 | -0.27 | 1.22  | 0.32  | 1.77  | -1.06 | 1.27 |
| FBX14       | 144699 | NM_152441    | 6662 | -0.84 | -0.49 | 0.28  | -1.14 | -0.90 | -0.98 | 0.26  | 0.16  | 0.85  | -1.05 | -1.02 | 1.27 |
| WDR7        | 2318   | NM_025284    | 6663 | 1.28  | 1.14  | 0.45  | 0.68  | 0.48  | 0.48  | 0.14  | 0.48  | 0.45  | 4.96  | 1.16  | 1.27 |
| SMPD3       | 55512  | NM_018667    | 6664 | -0.46 | -0.12 | -0.53 | -1.32 | -1.29 | -0.82 | 0.13  | 0.87  | 0.27  | -1.11 | -1.42 | 1.27 |
| CDORF31     | 80863  | NM_030651    | 6665 | 1.22  | 1.10  | 0.92  | 0.54  | 0.61  | 0.52  | 0.87  | 0.07  | 0.48  | 3.24  | 1.66  | 1.27 |
| MGC49923    | 12484  | NM_000483    | 6666 | 0.67  | 0.20  | 1.31  | -0.20 | 0.72  | -0.29 | 0.62  | 0.52  | 0.09  | 2.19  | -0.18 | 1.27 |
| KIAA2028    | 130271 | NM_172069    | 6667 | 1.61  | 0.44  | 0.91  | 0.00  | 0.00  | 0.44  | 0.44  | 0.01  | 0.82  | 2.86  | -0.43 | 1.27 |
| OR9Q2       | 219957 | NM_001005283 | 6668 | 1.40  | 0.35  | 1.18  | -0.14 | 0.10  | 0.21  | 0.73  | -0.36 | 0.90  | 2.94  | 0.16  | 1.27 |
| RAB3C       | 115827 | NM_138453    | 6669 | 0.58  | 0.32  | 0.93  | 0.01  | 0.70  | -0.56 | -0.05 | -0.14 | 1.46  | 1.83  | 0.15  | 1.27 |
| TGR         | 693    | NM_030771    | 6670 | 1.75  | 1.07  | 1.18  | 0.95  | 1.07  | 1.08  | 0.24  | 0.62  | 0.18  | 6.08  | 5.17  | 1.27 |
| SYNR        | 132204 | NM_001130003 | 6671 | 2.21  | 1.10  | 1.77  | 0.54  | 0.82  | 0.14  | 0.51  | 0.04  | 0.73  | 5.08  | 1.50  | 1.27 |
| CR6         | 1235   | NM_004167    | 6672 | 1.66  | 1.92  | 1.95  | 0.89  | 0.95  | 0.74  | 0.16  | 0.54  | 0.57  | 5.53  | 2.58  | 1.27 |
| FNH18       | 22487  | NM_004118    | 6673 | 0.46  | 0.10  | 0.47  | 0.46  | 0.19  | 0.19  | 0.19  | 0.19  | 0.19  | 0.06  | 0.06  | 1.27 |
| NKRK10      | 55608  | NM_017664    | 6674 | -0.17 | -0.41 | 0.00  | -0.57 | -0.59 | -0.56 | 0.47  | 0.10  | -0.70 | -0.58 | -1.72 | 1.27 |
| LOC129401   | 129401 | NM_00100844  | 6675 | -0.68 | -1.21 | 0.15  | -0.96 | -0.04 | -0.79 | 0.06  | 0.96  | 2.17  | -1.74 | -1.79 | 1.27 |
| LOC6768     | 116159 | NM_000658    | 6676 | -0.48 | -0.56 | 0.45  | -0.88 | -1.28 | -0.65 | -0.13 | 0.27  | 0.88  | -2.29 | -1.88 | 1.27 |
| TGR2        | 7942   | NM_003128    | 6677 | 0.14  | 0.50  | 0.14  | 0.31  | -0.81 | 0.14  | -0.24 | 1.54  | -0.03 | 0.78  | -0.36 | 1.27 |
| GRM2        | 2912   | NM_000839    | 6678 | -0.72 | -0.28 | -0.72 | -0.68 | -1.41 | -0.41 | 0.52  | 1.07  | -0.32 | -1.72 | -2.50 | 1.27 |
| LOC824001   | 24001  | NM_198082    | 6679 | 0.33  | 1.24  | 0.90  | 0.47  | 0.34  | 0.20  | 0.29  | 0.48  | 0.49  | 2.47  | 1.01  | 1.27 |
| PKB3        | 554    | NM_000449    | 6680 | 1.13  | 0.32  | 1.14  | 0.58  | 1.15  | 0.39  | 0.12  | 0.88  | 0.62  | 0.62  | 0.22  | 1.27 |
| FLU1065     | 55200  | NM_018173    | 6681 | -0.41 | -0.66 | -0.03 | -0.87 | -0.64 | -0.60 | 0.11  | 0.27  | 0.88  | -1.10 | -2.11 | 1.27 |
| SLC39A12    | 221074 | NM_152725    | 6682 | -0.42 | -0.26 | -0.30 | -0.64 | -1.13 | -0.59 | -0.19 | 0.62  | 0.83  | -0.98 | -2.35 | 1.26 |
| NKA15       | 390656 | NM_001001674 | 6683 | 1.54  | 1.26  | 1.50  | 0.52  | 1.50  | 1.50  | 0.52  | 1.50  | 1.50  | 1.54  | 0.49  | 1.26 |
| HSFY2       | 159119 | NM_001001877 | 6684 | -0.10 | 0.07  | 0.45  | -0.20 | -0.12 | -0.35 | -0.39 | 0.90  | 0.75  | 0.43  | -0.66 | 1.26 |
| FLU1070     | 55731  | NM_018182    | 6685 | 0.27  | 0.09  | -0.21 | -0.86 | -0.20 | -0.67 | 0.81  | 0.31  | 0.13  | 0.15  | -1.74 | 1.26 |
| MGC294910   | 28347  | NM_001810    | 6686 | 1.14  | 1.24  | 1.10  | 0.82  | 1.14  | 1.24  | 1.10  | 0.82  | 1.14  | 2.47  | 0.72  | 1.26 |
| CK18        | 1163   | NM_001826    | 6687 | 3.46  | 1.00  | 0.81  | 0.45  | 0.03  | 0.04  | 0.62  | 0.27  | 0.37  | 5.26  | 0.44  | 1.26 |
| ZMA2        | 23619  | NM_015363    | 6688 | -0.79 | -1.41 | 0.49  | -0.08 | -2.36 | -0.31 | -0.13 | 1.19  | 0.20  | -1.71 | -2.59 | 1.26 |
| ASH1        | 427    | NM_177024    | 6689 | -0.62 | -2.22 | 0.87  | -0.08 | -0.24 | -0.13 | 0.30  | 0.68  | 0.28  | 2.47  | -0.45 | 1.26 |
| NRP11       | 4889   | NM_001003996 | 6690 | -1.53 | -1.94 | -1.31 | -3.14 | -2.19 | -2.14 | 1.58  | 1.16  | -4.78 | 8.97  | 1.26  |      |
| CALM1       | 801    | NM_006888    | 6691 | -0.45 | 0.34  | 1.39  | -0.14 | -0.03 | -0.35 | -0.41 | 0.31  | 1.36  | 1.28  | -0.24 | 1.26 |
| FUT3        | 2525   | NM_000949    | 6692 | 0.21  | -0.71 | 0.13  | -0.49 | -0.67 | -0.43 | 0.44  | -0.40 | 1.22  | -0.36 | -1.59 | 1.26 |
| 110         | 110    | NM_000986    | 6693 | 0.70  | 1.29  | 1.55  | 0.62  | 0.12  | 0.12  | 0.62  | 1.02  | 0.62  | 1.33  | 2.29  | 1.26 |
| DCX         | 51181  | NM_016286    | 6694 | 0.01  | 0.67  | -0.55 | -1.28 | -1.21 | -1.16 | 0.94  | -0.02 | 0.34  | -1.22 | -1.65 | 1.26 |
| SPAL11      | 26937  | NM_015556    | 6695 | 0.64  | 0.92  | 0.97  | 0.14  | 0.33  | 0.14  | 0.37  | 0.41  | 0.48  | 2.52  | 0.62  | 1.26 |
| PCN1        | 6580   | NM_021078    | 6696 | 1.76  | 1.20  | 1.50  | 0.79  | 1.20  | 1.50  | 0.79  | 1.20  | 1.50  | 1.76  | 1.46  | 1.26 |
| COP8        | 10920  | NM_006710    | 6697 | -0.76 | -0.73 | -0.37 | -0.55 | 0.35  | 0.21  | 0.27  | 0.19  | 0.80  | -1.87 | 0.01  | 1.26 |
| ZNF278      | 23598  | NM_032051    | 6698 | 1.47  | -0.28 | 0.17  | 0.42  | -0.49 | -0.78 | 0.58  | 0.00  | 0.68  | 1.36  | -0.85 | 1.25 |
| LHR         | 58956  | NM_001014434 | 6699 | -0.87 | 0.09  | -0.60 | -1.75 | -1.09 | -0.72 | 0.49  | 0.89  | -0.12 | -1.38 | -3.56 | 1.25 |
| LOC27614078 | 36378  | NM_194292    | 6700 | 0.74  | 0.47  | 0.91  | 0.01  | 0.46  | 0.10  | 0.10  | 0.10  | 0.10  | 0.76  | 0.25  | 1.25 |
| KIA0738     | 9747   | NM_014719    | 6701 | 3.48  | 0.94  | 1.71  | 0.61  | -0.02 | 0.30  | 0.83  | 0.12  | 0.30  | 6.12  | 0.89  | 1.25 |
| IL3RA2      | 3598   | NM_000640    | 6702 | 1.12  | 1.52  | 0.19  | 0.44  | 0.03  | 0.19  | 0.42  | 0.95  | -0.11 | 2.84  | 0.65  | 1.25 |
| CEBPB       | 185    | NM_0005194   | 6703 | -0.58 | -0.38 | 0.65  | 0.52  | -0.40 | -0.38 | -0.13 | 0.45  | 0.84  | -1.31 | -1.40 | 1.25 |
| PPP2R5C     | 5527   | NM_178588    | 6704 | 1.23  | 1.79  | 0.44  | -0.93 | 0.67  | 1.20  | 1.11  | 0.53  | -0.39 | 3.46  | 0.94  | 1.25 |
| ZNF426      | 79888  | NM_024106    | 6705 | 1.15  | 0.24  | 0.36  | -0.26 | -0.43 | -0.16 | 0.68  | 0.19  | 0.37  | 1.75  | -0.85 | 1.25 |
| OR9L1       | 21967  | NM_001005212 | 6706 | -0.12 | 0.83  | 1.78  | 0.23  | 0.18  | 0.12  | 0.12  | 0.12  | 0.12  | 2.84  | 0.42  | 1.25 |
| KIA1970     | 12454  | NM_001083614 | 6707 | 0.11  | 1.02  | 0.60  | 0.09  | 0.02  | 0.32  | 0.87  | 0.06  | 0.26  | 1.05  | 1.74  | 1.25 |
| PHB2        | 2048   | NM_017449    | 6708 | -0.94 | -1.67 | -0.90 | -2.22 | -2.31 | -1.33 | 2.05  | -0.68 | -0.12 | -5.11 | -5.86 | 1.25 |
| KCNH10      | 54207  | NM_138118    | 6709 | -0.63 | 0.22  | 0.28  | -0.70 | -0.35 | -0.09 | -0.23 | 0.87  | 0.60  | -0.13 | -1.11 | 1.25 |
| NDC3        | 10002  | NM_014249    | 6710 | 0.49  | 0.33  | 0.80  | 0.42  | -1.07 | -0.84 | -0.27 | 0.10  | 0.10  | -1.63 | 0.88  | 1.25 |
| GARM1       | 10498  | NM_199141    | 6711 | 1.21  | -0.09 | -0.31 | -0.57 | -0.20 | -0.37 | 1.18  | -0.08 | 0.14  | 0.81  | -1.14 | 1.25 |
| PKD112      | 114780 | NM_182740    | 6712 | -0.64 | -0.01 | -0.21 | -0.29 | -0.46 | -0.73 | -0.43 | 0.82  | 0.86  | -0.86 | -1.48 | 1.25 |
| SFR5        | 8246   | NM_00101287  | 6713 | 1.20  | 1.22  | 1.50  | 1.14  | 1.46  | 1.46  | 1.14  | 1.46  | 1.46  | 1.92  | 1.32  | 1.25 |
| OR8G5       | 219805 | NM_001005158 | 6714 | -0.97 | 0.01  | -0.67 | -0.06 | -1.17 | -0.84 | -0.49 | 1.89  | -0.16 | -1.63 | -2.07 | 1.25 |
| C14ORF104   | 155172 | NM_001083908 | 67   |       |       |       |       |       |       |       |       |       |       |       |      |

|             |        |               |      |       |       |       |       |       |       |       |       |       |       |       |      |
|-------------|--------|---------------|------|-------|-------|-------|-------|-------|-------|-------|-------|-------|-------|-------|------|
| TRK2        | 54209  | NM_018965     | 6797 | -0.62 | -0.89 | 0.37  | -1.12 | -0.99 | -0.61 | -0.06 | -0.29 | 1.54  | -1.14 | -2.71 | 1.19 |
| DOCK4       | 1195   | NM_020862     | 6798 | -0.34 | -0.62 | -0.70 | -0.36 | -0.80 | -0.17 | 0.78  | 1.17  | 0.47  | -0.55 | -2.18 | 1.19 |
| IF218       | 23946  | NM_017596     | 6799 | 0.93  | 1.85  | 1.62  | 0.78  | 0.86  | 0.95  | 0.06  | 0.08  | 1.05  | 4.40  | 2.59  | 1.19 |
| DOCK4       | 9732   | NM_014705     | 6800 | 0.61  | 0.16  | 0.58  | -0.77 | -0.34 | 0.19  | 0.62  | 0.15  | 0.42  | 1.35  | -0.92 | 1.19 |
| VP24        | 51652  | NM_001005753  | 6801 | -1.11 | 0.00  | 0.19  | 0.87  | 0.31  | 2.23  | 1.85  | 0.10  | -0.76 | 0.09  | 5.42  | 1.19 |
| RR49        | 8518   | NM_0010040    | 6802 | 0.23  | 0.70  | 1.22  | 0.00  | 0.00  | -0.12 | 0.96  | 0.00  | 0.69  | 0.69  | 0.32  | 1.19 |
| MGC29891    | 126236 | NM_144618     | 6803 | 1.40  | 0.73  | 1.00  | 0.18  | 0.20  | 0.70  | 0.97  | 0.17  | 0.04  | 3.13  | 1.08  | 1.19 |
| PDP         | 64714  | NM_006849     | 6804 | 1.00  | 0.35  | 0.38  | 0.11  | -0.11 | -0.43 | 0.79  | 0.00  | 0.39  | 1.74  | -0.42 | 1.19 |
| KFM         | 17     | NM_0101133    | 6805 | 1.38  | 0.11  | 0.43  | 0.18  | 0.11  | 0.65  | 1.38  | 0.11  | 0.43  | 1.70  | 0.23  | 1.19 |
| NAT9        | 26151  | NM_015654     | 6806 | 3.93  | 1.77  | 1.37  | 1.69  | 1.21  | 0.84  | 0.72  | 0.44  | 0.02  | 7.08  | 3.74  | 1.18 |
| MGC47869    | 144608 | NM_175874     | 6807 | 0.48  | 1.79  | 0.16  | -0.56 | -0.25 | -0.25 | 0.23  | 0.85  | 0.10  | 2.43  | -1.07 | 1.18 |
| SLC38A2     | 5103   | NM_008949     | 6808 | 0.80  | 0.52  | 0.44  | 0.00  | 0.35  | 0.10  | 1.52  | 0.11  | 0.26  | 2.98  | 0.54  | 1.18 |
| SLC38A1     | 10991  | NM_006841     | 6809 | 1.49  | -0.21 | 0.59  | -0.69 | 0.11  | -0.30 | 1.22  | -0.16 | 0.12  | 1.86  | -0.89 | 1.18 |
| CLADR4      | 64207  | NM_024496     | 6810 | 0.80  | 0.06  | 0.27  | -0.77 | -0.42 | -0.59 | 0.68  | 0.15  | 0.35  | 1.01  | -1.78 | 1.18 |
| GLRA2       | 2742   | NM_002063     | 6811 | -0.05 | -0.38 | -0.09 | -0.19 | -0.77 | -0.89 | 0.04  | 0.79  | 0.35  | 0.24  | -1.84 | 1.18 |
| FLJ6119     | 264172 | NM_153524     | 6812 | 0.62  | 0.67  | 0.22  | 0.51  | 0.36  | 0.04  | -0.27 | 1.78  | 0.31  | 0.97  | 0.81  | 1.18 |
| BCU51       | 116285 | NM_052956     | 6813 | 0.58  | 0.89  | -0.05 | -0.45 | -0.02 | -1.13 | 0.26  | 0.30  | 0.63  | 1.41  | -1.61 | 1.18 |
| OKS3        | 4940   | NM_006187     | 6814 | 0.38  | -0.81 | 1.01  | 0.38  | -0.14 | -0.49 | 0.15  | -0.52 | 1.55  | 0.58  | -0.25 | 1.18 |
| SLC13A2     | 1318   | NM_0010060    | 6815 | 0.60  | 0.91  | 0.38  | 2.30  | 1.21  | 1.57  | 0.11  | 1.01  | 0.06  | 1.90  | 5.08  | 1.18 |
| MTCH1       | 23787  | NM_014341     | 6816 | 1.61  | 0.34  | 0.94  | 0.05  | -0.10 | 0.17  | 0.97  | -0.05 | 0.26  | 2.88  | 0.12  | 1.18 |
| NFE2L2      | 4780   | NM_006164     | 6817 | -0.35 | -0.26 | 0.07  | -1.11 | -0.88 | 0.37  | 0.79  | 0.34  | 0.05  | -0.54 | -1.62 | 1.18 |
| THM2        | 26230  | NM_001010927  | 6818 | 2.57  | 2.29  | 1.40  | 0.27  | 1.15  | 1.28  | 1.19  | -0.10 | 0.09  | 6.26  | 2.70  | 1.18 |
| MLT3        | 4300   | NM_004529     | 6819 | 0.11  | 0.12  | -0.08 | -0.28 | -0.47 | -0.15 | 0.49  | 0.85  | -0.16 | 0.15  | -0.90 | 1.18 |
| C20ORF67    | 63935  | NM_022104     | 6820 | 2.39  | 1.31  | 1.13  | -0.69 | 1.76  | -0.24 | 0.62  | 0.00  | 0.56  | 4.83  | 0.83  | 1.18 |
| TLC         | 7036   | NM_003125     | 6821 | 0.88  | 0.46  | 0.52  | 0.03  | 0.55  | -0.23 | 0.12  | 0.21  | 0.85  | 1.86  | 0.37  | 1.18 |
| KLAF8       | 10270  | NM_005658     | 6822 | 1.57  | 1.24  | 1.09  | 0.35  | 0.42  | 0.31  | 0.21  | 0.57  | 0.89  | 3.90  | 0.95  | 1.18 |
| RAMP2       | 102466 | NM_005854     | 6823 | 0.76  | 0.87  | 1.78  | 0.90  | 0.97  | 1.35  | 0.13  | 0.24  | 0.81  | 3.41  | 3.22  | 1.18 |
| KTF         | 7086   | NM_001064     | 6824 | 0.95  | 0.55  | 0.44  | -0.16 | -0.03 | 0.39  | 0.36  | 0.29  | 0.51  | 1.95  | 0.20  | 1.18 |
| TF21        | 1175   | NM_021275     | 6825 | 0.64  | 0.29  | 0.09  | 0.20  | 1.09  | 0.39  | 0.62  | 0.19  | 0.29  | 2.49  | 1.34  | 1.18 |
| CLORF38     | 9473   | NM_001039477  | 6826 | -0.10 | -0.10 | 0.49  | 0.02  | -0.29 | -0.39 | -0.09 | 0.34  | 0.93  | 0.28  | -0.66 | 1.18 |
| ORC74       | 254783 | NM_001005490  | 6827 | 1.14  | 0.93  | 0.06  | 0.05  | 0.14  | 0.12  | 1.02  | 0.20  | 0.05  | 2.13  | 0.31  | 1.18 |
| NHEM16B     | 5741   | NM_006173     | 6828 | 0.57  | 0.56  | 0.29  | 0.62  | 0.57  | 0.56  | 1.12  | -0.11 | 0.10  | 0.84  | 1.71  | 1.18 |
| HOMER1      | 8456   | NM_004272     | 6829 | 0.70  | 1.10  | 0.46  | 0.42  | -0.13 | -0.41 | 0.38  | 0.25  | 0.54  | 2.26  | 0.16  | 1.18 |
| FLJ1731     | 286122 | NM_173687     | 6830 | -1.82 | -0.38 | 1.05  | -0.85 | -0.21 | 0.41  | 0.48  | 0.24  | 0.46  | 0.28  | -0.65 | 1.17 |
| PCDH9B4     | 8641   | NM_010298     | 6831 | 0.38  | 0.44  | 1.30  | 1.12  | 0.66  | -0.09 | 0.20  | -0.13 | 1.10  | 3.57  | 1.73  | 1.17 |
| LOC129429   | 139462 | NM_04011930   | 6832 | 1.30  | 0.53  | 0.99  | 0.83  | 1.30  | 1.58  | 0.90  | 0.52  | 0.82  | 2.00  | 0.46  | 1.17 |
| CCNH        | 902    | NM_001239     | 6833 | 1.11  | 0.16  | 0.79  | -0.21 | -0.36 | -0.24 | 0.67  | 0.08  | 0.42  | 2.07  | -0.82 | 1.17 |
| TLE3        | 7090   | NM_005078     | 6834 | 0.22  | 1.15  | 1.97  | 0.04  | 2.29  | 0.98  | 0.22  | -0.13 | 1.09  | 3.34  | 3.31  | 1.17 |
| SEZL        | 2354   | NM_011115     | 6835 | 0.45  | 0.43  | 0.43  | 0.49  | 0.49  | 0.49  | 0.49  | 0.49  | 0.49  | 1.27  | 0.73  | 1.17 |
| STAP2       | 55620  | NM_001013841  | 6836 | 0.75  | -0.35 | 0.34  | -0.42 | -0.32 | -0.38 | 0.95  | 0.07  | 0.15  | 0.74  | -1.12 | 1.17 |
| MMP18L      | 29074  | NM_014161     | 6837 | 2.48  | 1.28  | 0.83  | 0.01  | 0.55  | 0.50  | 1.03  | 0.14  | 0.00  | 4.59  | 1.06  | 1.17 |
| PTP2A1      | 1397   | NM_00100783   | 6838 | -0.78 | -0.51 | 0.03  | -0.66 | -0.18 | -0.19 | 0.40  | 0.40  | 0.40  | -1.21 | -1.74 | 1.17 |
| ASB15       | 142886 | NM_080928     | 6839 | 0.78  | -1.12 | -1.09 | -1.99 | -1.61 | -1.35 | 1.16  | 0.04  | -0.03 | 2.80  | -4.95 | 1.17 |
| GRAM2       | 196996 | NM_001012642  | 6840 | 1.01  | 0.77  | 1.26  | 0.42  | 0.04  | 0.17  | 0.24  | 0.35  | 0.58  | 3.04  | 0.63  | 1.17 |
| UBAD1       | 29914  | NM_013139     | 6841 | -0.37 | -0.67 | -0.79 | -1.04 | -0.76 | -0.33 | 0.97  | 0.75  | -0.55 | -1.82 | -1.11 | 1.17 |
| SLC29A9     | 55134  | NM_04375      | 6842 | 0.26  | 1.24  | 1.49  | 0.43  | 0.63  | 0.13  | 0.63  | 1.54  | 0.63  | 3.47  | 0.02  | 1.17 |
| TBX1        | 6889   | NM_008646     | 6843 | 0.58  | 0.89  | 1.33  | -0.39 | -0.01 | 0.13  | 0.26  | 0.35  | 0.56  | 2.80  | -0.27 | 1.17 |
| LOC126669   | 126669 | NM_001010846  | 6844 | 1.72  | 0.77  | 0.82  | 0.88  | 0.42  | 0.32  | 0.04  | 0.39  | 0.74  | 3.31  | 1.62  | 1.17 |
| HTF8        | 3875   | NM_0199187    | 6845 | 2.64  | 1.87  | 1.87  | 1.62  | 1.87  | 1.87  | 1.62  | 1.87  | 1.87  | 5.82  | 3.57  | 1.17 |
| DREV1       | 51108  | NM_016025     | 6846 | 0.34  | 0.11  | 0.73  | -0.17 | 0.07  | 0.05  | 0.15  | -0.08 | 1.09  | 1.19  | -0.05 | 1.16 |
| CLORF51     | 148523 | NM_144697     | 6847 | 0.16  | -0.11 | 0.05  | -0.69 | -1.07 | -0.74 | 0.00  | 0.53  | 0.63  | 1.00  | -2.51 | 1.16 |
| LOC20024866 | 380249 | NM_0010024866 | 6848 | 1.09  | -0.62 | 0.60  | -0.89 | -0.62 | 0.40  | -0.62 | 0.40  | 0.60  | 1.09  | -0.66 | 1.16 |
| CLORF24     | 56851  | NM_020154     | 6849 | 2.19  | 1.78  | 2.17  | 0.88  | 1.15  | 2.37  | 1.26  | 0.01  | 0.09  | 6.14  | 4.39  | 1.16 |
| ABCC11      | 85320  | NM_151886     | 6850 | 1.07  | 0.68  | 0.67  | -0.24 | 0.17  | 0.28  | 0.68  | 0.46  | 0.02  | 2.42  | 0.21  | 1.16 |
| FAM25A      | 119395 | NM_001129742  | 6851 | 0.32  | 1.05  | 1.26  | 0.76  | 1.17  | 0.49  | 0.17  | 0.50  | 0.49  | 2.62  | 2.42  | 1.16 |
| PRR2        | 65247  | NM_006048     | 6852 | 1.34  | 0.46  | 0.96  | 0.46  | 0.13  | 0.40  | 0.62  | 0.10  | 0.40  | 2.76  | 0.50  | 1.16 |
| TSSC1       | 7260   | NM_003110     | 6853 | 0.40  | 1.09  | 0.17  | -0.44 | -0.06 | 0.09  | 0.23  | 0.66  | 0.27  | 1.66  | -1.18 | 1.16 |
| NRF21       | 7025   | NM_005654     | 6854 | -0.16 | -0.56 | 1.06  | -0.43 | -0.63 | -0.29 | -0.02 | 0.29  | 0.89  | 0.34  | -0.76 | 1.16 |
| TOX         | 7011   | NM_005659     | 6855 | 0.95  | 0.99  | 0.19  | 0.13  | -0.17 | 0.19  | 0.13  | -0.17 | 0.19  | 0.86  | 1.26  | 1.16 |
| ABCG1       | 9619   | NM_207629     | 6856 | -1.05 | -0.87 | -1.01 | -2.09 | -2.08 | -1.45 | 1.05  | 0.28  | -0.17 | -2.94 | -1.63 | 1.16 |
| RABL5       | 64792  | NM_001130820  | 6857 | -0.20 | 0.03  | 0.17  | -0.79 | -0.59 | -0.22 | 0.62  | 0.35  | 0.18  | 0.00  | -1.56 | 1.16 |
| SCDH        | 2639   | NM_00100976   | 6858 | 1.55  | 0.64  | 0.03  | 0.83  | 0.03  | 0.28  | 0.66  | 0.33  | 0.22  | 2.22  | 0.64  | 1.16 |
| FAM2        | 23017  | NM_012306     | 6859 | 0.64  | 0.50  | 0.01  | -1.07 | 0.12  | 0.06  | 1.41  | -0.10 | -0.16 | 1.15  | -0.89 | 1.16 |
| FLJ37451    | 284161 | NM_182569     | 6860 | -0.21 | 1.66  | 1.54  | -1.08 | 0.27  | 1.08  | 0.60  | 0.10  | 0.46  | 2.99  | 0.28  | 1.16 |
| USP22       | 23326  | NM_042698     | 6861 | -0.81 | -0.08 | -0.09 | -0.21 | 0.05  | -0.41 | -0.56 | 0.83  | 0.88  | -0.98 | -0.58 | 1.15 |
| CBR1        | 23481  | NM_00102123   | 6862 | 0.45  | 0.86  | 1.44  | 0.67  | 0.66  | 0.66  | 0.66  | 0.66  | 0.66  | 2.07  | 0.36  | 1.15 |
| S100B       | 6285   | NM_006272     | 6863 | 1.08  | 0.49  | 1.35  | 0.37  | 1.02  | 0.27  | 0.60  | -0.04 | 0.59  | 2.91  | 1.65  | 1.15 |
| PCNP        | 57992  | NM_020357     | 6864 | 2.17  | 2.39  | 2.70  | 1.61  | 2.89  | 2.42  | 0.21  | 0.44  | 0.51  | 7.26  | 6.92  | 1.15 |
| GLD3A       | 498    | NM_002351     | 6865 | 0.27  | 0.34  | 0.65  | 0.04  | 0.05  | -0.20 | 0.04  | 0.05  | 0.20  | 0.69  | 0.80  | 1.15 |
| UAP1        | 6675   | NM_003115     | 6866 | -1.88 | -1.24 | 1.51  | -1.37 | -2.46 | -1.14 | -0.17 | 0.14  | 1.18  | -0.61 | -3.98 | 1.15 |
| KCTD7       | 154881 | NM_153033     | 6867 | 0.53  | 0.65  | 0.43  | 0.24  | -0.01 | 0.14  | -0.38 | 1.34  | 0.40  | 1.61  | 0.37  | 1.15 |
| NHEH19      | 11611  | NM_00100783   | 6868 | -0.74 | -0.92 | -0.60 | -0.80 | -0.80 | -0.80 | 0.76  | 0.40  | 0.40  | -0.80 | -2.87 | 1.15 |
| MGC34290    | 120400 | NM_152315     | 6869 | 0.38  | 0.42  | 1.44  | -0.37 | 0.21  | 0.18  | 0.31  | 0.05  | 0.79  | 2.25  | 0.34  | 1.15 |
| ROBO2       | 6092   | NM_002942     | 6870 | 1.08  | 0.93  | 1.24  | 0.05  | 0.59  | 0.59  | 0.87  | 0.04  | 0.23  | 3.25  | 1.23  | 1.15 |
| PTPRC       | 5788   | NM_080923     | 6871 | -0.77 | -0.27 | -0.91 | -1.23 | -1.62 | -1.59 | 0.18  | 0.58  | 0.39  | -1.95 | -4.45 | 1.15 |
| TRAP1       | 7972   | NM_004072     | 6872 | 1.26  | 1.24  | 1.47  | 0.40  | -0.40 | 0.40  | 1.75  | -0.21 | 0.12  | 0.55  | 0.32  | 1.15 |
| BP1         | 629    | NM_001710     | 6873 | 0.67  | 0.91  | 0.28  | 0.12  | 0.19  | 0.39  | 0.41  | 0.67  | 0.06  | 1.85  | 0.69  | 1.15 |
| KIFAR       | 140738 | NM_183240     | 6874 | -0.34 | -0.76 | -0.15 | -0.86 | -0.81 | -1.68 | 0.29  | 0.59  | 1.45  | -1.24 | -3.35 | 1.15 |
| COG2        | 825    | NM_003496     | 6875 | 0.85  | 0.88  | 0.77  | 0.87  | 0.88  | 0.77  | 0.87  | 0.88  | 0.77  | 2.47  | 2.51  | 1.15 |
| ADMIR       | 22796  | NM_007357     | 6876 | 1.55  | 0.42  | 2.15  | 4.30  | 2.76  | 1.83  | -0.15 | 0.84  | 0.45  | 7.72  | 8.89  | 1.14 |
| FOH1        | 11318  | NM_007764     | 6    |       |       |       |       |       |       |       |       |       |       |       |      |

|           |        |              |      |       |       |       |       |       |       |       |       |       |       |       |      |
|-----------|--------|--------------|------|-------|-------|-------|-------|-------|-------|-------|-------|-------|-------|-------|------|
| C1WR151   | 440274 | NM_001032363 | 6959 | 0.87  | 0.32  | 0.95  | 0.25  | 0.11  | 0.40  | 0.67  | 0.31  | 0.33  | 2.14  | 0.76  | 1.11 |
| FCRRL1    | 53829  | NM_001032363 | 6960 | 1.29  | -0.26 | 1.17  | 0.97  | 2.30  | 1.12  | 0.62  | 0.26  | 0.27  | 2.20  | 0.66  | 1.11 |
| ENRCP     | 6631   | NM_003093    | 6961 | -0.37 | -0.53 | -0.09 | 0.09  | -1.10 | -0.85 | -0.06 | 0.68  | 0.48  | -0.88 | -1.85 | 1.11 |
| SFPQ      | 6421   | NM_005066    | 6962 | -0.35 | -1.31 | -0.88 | -2.21 | -2.91 | -1.67 | 0.85  | 0.20  | 0.06  | -2.53 | -6.79 | 1.11 |
| RM103     | 7944   | NM_005067    | 6963 | 0.37  | 0.61  | 0.00  | -0.32 | -0.90 | 0.22  | 0.38  | 0.98  | -0.25 | 0.97  | -1.00 | 1.11 |
| FCRFL068  | 93388  | NM_001032363 | 6964 | 0.07  | 0.29  | 0.14  | 0.04  | 0.03  | 0.96  | 1.14  | 0.03  | 0.00  | 0.74  | 2.22  | 1.11 |
| RM139     | 112336 | NM_007218    | 6965 | -0.34 | -0.41 | -0.61 | -1.16 | -1.36 | -0.86 | 0.75  | 0.63  | -0.28 | -1.36 | -3.38 | 1.11 |
| SOX6      | 55553  | NM_003326    | 6966 | 0.17  | 0.59  | -0.06 | -0.53 | 0.18  | -0.50 | 0.88  | 0.03  | 0.20  | 0.69  | -0.86 | 1.11 |
| MCLC      | 2315   | NM_005127    | 6967 | 0.46  | 0.43  | 0.43  | 0.46  | 0.46  | 0.46  | 0.66  | 0.21  | 0.13  | 1.11  | 0.34  | 1.11 |
| PXK9      | 5083   | NM_006194    | 6968 | 1.42  | 0.56  | 0.83  | 0.00  | -0.03 | 0.16  | 0.64  | 0.20  | 0.27  | 2.80  | 0.31  | 1.11 |
| CTGF      | 1490   | NM_001901    | 6969 | 0.59  | 2.29  | 2.11  | 0.56  | 2.66  | 0.82  | -0.03 | -0.09 | 1.23  | 4.98  | 4.04  | 1.11 |
| HRD15     | 2887   | NM_001031849 | 6970 | 1.36  | 0.57  | 0.10  | 0.37  | 0.60  | 0.03  | 0.07  | 0.12  | 0.41  | 2.96  | 1.09  | 1.10 |
| HSPCB     | 3326   | NM_007355    | 6971 | 0.54  | -0.06 | 0.74  | -0.56 | -0.42 | -0.14 | 0.27  | 0.18  | 0.65  | 1.22  | -1.12 | 1.10 |
| ZMYND12   | 84217  | NM_0032257   | 6972 | -0.27 | 0.14  | -0.65 | -0.10 | -0.47 | -0.72 | 0.03  | 1.00  | 0.07  | -0.24 | -1.29 | 1.10 |
| TLR7      | 51284  | NM_016562    | 6973 | -0.12 | -1.04 | 0.23  | 0.46  | -0.21 | -0.47 | -0.43 | -0.57 | 2.10  | -0.82 | -0.22 | 1.10 |
| SNRPB2    | 1653   | NM_000597    | 6974 | -0.69 | -1.23 | -1.62 | -1.81 | -2.36 | -1.83 | 0.30  | 0.81  | 0.00  | 3.50  | -6.59 | 1.10 |
| COCH      | 1690   | NM_004086    | 6975 | 1.21  | 0.48  | 0.29  | 1.14  | 1.18  | 0.41  | 1.36  | -0.30 | 0.04  | 1.98  | 2.73  | 1.10 |
| TEBP      | 10728  | NM_006061    | 6976 | 0.01  | -0.56 | 0.94  | 0.22  | 0.34  | 0.35  | -0.13 | -0.41 | 1.63  | 0.39  | 0.92  | 1.10 |
| LOC382828 | 388284 | NM_001032363 | 6977 | 0.40  | 0.47  | 0.31  | -0.50 | -0.90 | -0.39 | 0.78  | 0.23  | 0.09  | 1.18  | 2.18  | 1.10 |
| MRPL12    | 6182   | NM_002949    | 6978 | -0.64 | -0.55 | -0.32 | -1.30 | -1.26 | -1.50 | 0.17  | 0.32  | 0.60  | -1.51 | -4.06 | 1.10 |
| ZNF7      | 7549   | NM_001017396 | 6979 | 2.27  | 0.30  | 0.22  | -0.24 | 0.33  | 0.13  | 1.19  | -0.15 | 0.05  | 2.79  | 0.22  | 1.10 |
| DISAL1    | 39645  | NM_001004731 | 6980 | 1.70  | 1.67  | 1.71  | 0.86  | 0.47  | 0.71  | 0.09  | 0.59  | 0.41  | 5.08  | 2.04  | 1.10 |
| TNFSF15   | 8966   | NM_005118    | 6981 | 1.15  | -0.28 | 0.00  | -0.67 | 0.60  | 0.25  | 1.50  | -0.39 | -0.02 | 0.86  | 0.18  | 1.09 |
| EPHX1     | 2052   | NM_000120    | 6982 | 2.09  | 1.08  | 0.69  | 0.75  | 0.28  | 1.92  | 1.15  | 0.32  | -0.37 | 3.86  | 2.95  | 1.09 |
| MLA DDA2  | 3138   | NM_020056    | 6983 | 2.32  | 2.40  | 1.33  | 1.45  | 1.65  | 2.33  | 0.51  | 0.58  | 0.01  | 6.05  | 5.43  | 1.09 |
| XPYRP1    | 7511   | NM_002383    | 6984 | -0.45 | -0.23 | 1.35  | 1.48  | 2.03  | 1.54  | 0.29  | -0.45 | 1.83  | 0.57  | 5.04  | 1.09 |
| C10ORF111 | 221060 | NM_153244    | 6985 | -0.26 | -0.87 | -0.69 | -0.69 | -1.70 | -1.56 | 0.13  | 0.31  | 0.65  | -1.31 | -3.95 | 1.09 |
| FLJ25421  | 150550 | NM_152512    | 6986 | -0.76 | 0.40  | 0.18  | 0.17  | -0.26 | 0.07  | 0.35  | 0.65  | 0.09  | 1.34  | -0.01 | 1.09 |
| FLJ11646  | 55316  | NM_018346    | 6987 | 0.34  | 0.56  | 0.07  | 0.18  | 0.03  | 0.54  | 0.18  | 0.03  | 0.56  | 0.14  | 0.85  | 1.09 |
| PXRVB     | 29780  | NM_013327    | 6988 | -0.28 | -0.35 | -0.37 | -1.08 | -0.52 | -0.80 | 0.39  | 0.42  | 0.28  | -1.00 | -2.40 | 1.09 |
| USP32     | 84669  | NM_032382    | 6989 | 0.25  | -0.25 | 0.21  | -0.76 | -0.59 | -0.99 | 0.26  | -0.22 | 1.05  | 0.21  | -2.35 | 1.09 |
| SLC49L6   | 8477   | NM_001274    | 6990 | 0.63  | 0.68  | 0.83  | 0.69  | 0.76  | 0.41  | 0.76  | 0.11  | 0.41  | 1.64  | 0.50  | 1.09 |
| ILKAP10   | 402715 | NM_926643    | 6991 | 0.69  | 0.51  | 0.47  | 1.01  | 0.10  | 0.93  | 0.57  | 0.31  | 0.20  | 1.67  | 1.54  | 1.09 |
| NPS       | 594857 | NM_001030013 | 6992 | 0.49  | 0.31  | 0.15  | 0.40  | -0.44 | 0.13  | 0.31  | 0.73  | 0.05  | 0.95  | 0.09  | 1.09 |
| CD3E      | 916    | NM_000733    | 6993 | 0.17  | 2.03  | 0.22  | 0.06  | 0.10  | 0.22  | 0.33  | 0.84  | -0.08 | 2.42  | 0.38  | 1.09 |
| UNC93B    | 64386  | NM_00103971  | 6994 | 1.99  | 1.66  | 0.95  | 0.68  | 0.48  | 0.89  | 0.68  | 0.89  | 0.68  | 4.60  | 1.63  | 1.09 |
| PO2G      | 23126  | NM_145796    | 6995 | -0.33 | -0.65 | 0.36  | -1.02 | -1.02 | -0.55 | 0.45  | -0.08 | 0.71  | -0.63 | -2.60 | 1.09 |
| NANOG     | 79923  | NM_024865    | 6996 | -0.18 | -0.14 | -0.35 | -0.96 | -0.89 | -0.80 | 0.12  | 0.96  | 0.01  | -0.67 | -2.65 | 1.09 |
| ATP1B1    | 481    | NM_001001387 | 6997 | 0.85  | 0.12  | 0.17  | 0.19  | 0.09  | 0.17  | 0.19  | 0.09  | 0.17  | 0.81  | 0.24  | 1.09 |
| LOC390928 | 390928 | NM_001004318 | 6998 | -0.96 | -1.02 | 0.16  | -1.51 | -0.91 | -0.86 | 0.07  | -0.58 | 1.60  | -1.82 | -3.28 | 1.08 |
| FLJ09579  | 283130 | NM_173591    | 6999 | 0.64  | 0.34  | 0.28  | -0.11 | -0.21 | -0.15 | 1.09  | 0.13  | -0.14 | 1.26  | -0.48 | 1.08 |
| HRD16     | 4819   | NM_003885    | 7000 | -0.60 | -0.14 | 0.14  | -0.18 | -0.57 | -0.71 | -0.18 | -0.57 | -0.18 | -0.20 | -2.00 | 1.08 |
| MUTH      | 4595   | NM_012222    | 7001 | 0.31  | 0.75  | -0.11 | -0.11 | -0.09 | 0.05  | 0.03  | 1.36  | -0.30 | 0.33  | -0.14 | 1.08 |
| FLJ4266   | 39949  | NM_001100388 | 7002 | 1.27  | 0.21  | 0.22  | -0.40 | -0.60 | -0.66 | 0.91  | -0.12 | 0.29  | 1.69  | -1.67 | 1.08 |
| CDORF128  | 22448  | NM_145616    | 7003 | 0.77  | 1.07  | 1.05  | 0.01  | 0.34  | 0.59  | 0.14  | 0.30  | 0.64  | 2.89  | 0.94  | 1.08 |
| SMDL11    | 571    | NM_000215    | 7004 | 0.00  | 0.83  | 0.84  | -0.78 | -1.33 | -0.56 | 1.33  | -0.47 | 0.80  | 2.57  | 7.03  | 1.08 |
| SHPM1     | 7979   | NM_006304    | 7005 | 0.38  | -0.94 | -1.02 | -1.16 | -0.90 | -0.77 | 1.77  | -0.13 | 0.56  | -1.58 | -2.84 | 1.08 |
| HMB4      | 3214   | NM_024015    | 7006 | 0.40  | -0.37 | 0.30  | -0.41 | -0.11 | -0.02 | 0.96  | -0.19 | 0.31  | 0.33  | -0.54 | 1.08 |
| SLC10D1   | 8432   | NM_001002    | 7007 | 1.91  | 0.45  | 0.45  | 0.45  | 0.45  | 0.45  | 1.15  | 0.45  | 0.45  | 2.52  | 3.39  | 1.08 |
| BCOM1     | 58390  | NM_017429    | 7008 | -0.22 | 0.41  | 0.11  | -1.15 | 0.04  | -0.50 | 0.28  | 0.26  | 0.53  | 0.29  | -1.61 | 1.08 |
| DNAH9     | 4189   | NM_012328    | 7009 | 0.24  | 0.81  | 0.95  | 0.92  | -0.15 | 0.56  | 0.14  | 0.61  | 0.32  | 2.00  | 1.33  | 1.08 |
| HRD17     | 8419   | NM_007221    | 7010 | 0.42  | 0.28  | 0.78  | 0.10  | 0.22  | 0.18  | 0.10  | 0.22  | 1.62  | 1.58  | 0.40  | 1.08 |
| ZNF507    | 16398  | NM_152603    | 7011 | 1.78  | 1.12  | 0.73  | 0.71  | 0.58  | 0.01  | 0.10  | 0.26  | 0.72  | 3.63  | 1.28  | 1.08 |
| EIF33     | 8667   | NM_003756    | 7012 | -0.03 | -0.27 | -0.63 | -1.05 | 1.67  | -0.45 | 1.04  | 0.25  | -0.21 | -0.40 | -0.17 | 1.08 |
| CTC3      | 7203   | NM_001008000 | 7013 | -1.00 | -1.42 | -0.21 | -1.29 | -1.72 | -1.02 | 0.51  | -0.59 | 1.16  | -2.63 | -4.03 | 1.07 |
| LOC42028  | 5887   | NM_002074    | 7014 | 1.70  | 0.38  | 0.00  | -1.02 | 1.08  | 0.06  | 1.07  | 0.06  | 0.00  | 4.68  | -0.23 | 1.07 |
| PTPRR     | 5801   | NM_130846    | 7015 | 1.89  | 0.42  | 0.71  | -0.40 | -0.77 | 0.05  | 0.75  | 0.12  | 2.53  | 1.12  | -1.07 | 1.07 |
| SHC2      | 25759  | NM_175550    | 7016 | 0.83  | 2.12  | 0.78  | -0.19 | 0.04  | 0.79  | 0.70  | 0.50  | -0.13 | 3.79  | 0.64  | 1.07 |
| SLC49L2   | 702    | NM_003222    | 7017 | 1.13  | 1.20  | 0.76  | 0.94  | 0.99  | 0.86  | 1.07  | 0.86  | 2.10  | 1.30  | 1.07  |      |
| TNFR3     | 114112 | NM_051264    | 7018 | 2.27  | 0.33  | 2.87  | 1.88  | 1.46  | 1.07  | -0.04 | 0.67  | 0.44  | 8.17  | 4.41  | 1.07 |
| EDG6      | 8698   | NM_003775    | 7019 | -0.82 | -0.67 | -0.55 | -1.51 | -1.08 | -1.49 | 0.50  | 0.35  | 0.23  | -2.04 | -4.07 | 1.07 |
| CHC1      | 1439   | NM_002130    | 7020 | 1.02  | 0.86  | 0.65  | 0.20  | 0.66  | 0.60  | 0.97  | -0.21 | 0.41  | 2.93  | 1.56  | 1.07 |
| MUC1      | 4582   | NM_001018021 | 7021 | -0.13 | 0.80  | 0.49  | -0.58 | 0.03  | 0.16  | 0.61  | 0.19  | 0.27  | 1.15  | -0.40 | 1.07 |
| GSTA2     | 2939   | NM_000846    | 7022 | 0.17  | -0.72 | 0.70  | -0.84 | -0.72 | 0.00  | 0.52  | -0.02 | 0.56  | 0.15  | -1.56 | 1.07 |
| GLD1      | 2746   | NM_005071    | 7023 | 0.68  | -1.11 | 0.70  | 0.58  | 0.38  | 1.40  | 1.34  | 0.02  | -0.29 | 1.27  | 2.36  | 1.07 |
| TNO       | 724    | NM_002118    | 7024 | 0.26  | 0.07  | 0.14  | 0.94  | 0.12  | 0.12  | 0.94  | 0.12  | 0.12  | 0.63  | 2.95  | 1.07 |
| RBP22     | 10633  | NM_006477    | 7025 | 0.67  | 1.49  | 1.44  | 0.60  | 0.78  | 0.68  | 0.01  | 0.58  | 0.48  | 3.60  | 2.07  | 1.07 |
| ZFP37     | 7539   | NM_003008    | 7026 | 0.78  | -0.16 | 1.42  | 1.82  | 2.54  | 0.39  | 0.20  | -0.98 | 1.85  | 2.04  | 4.75  | 1.07 |
| HRD15     | 16745  | NM_001797    | 7027 | 0.64  | 0.21  | 0.43  | -0.16 | -0.64 | -0.60 | 0.16  | 0.16  | 0.16  | 0.89  | 0.97  | 1.07 |
| IFNA7     | 3444   | NM_021057    | 7028 | 0.82  | 1.06  | 0.68  | 0.22  | -0.03 | -0.11 | 0.53  | 0.42  | 0.11  | 2.56  | 0.07  | 1.07 |
| RORA      | 6095   | NM_134262    | 7029 | 0.46  | 0.80  | 0.87  | 0.05  | 0.33  | -0.38 | 0.21  | 0.12  | 0.74  | 2.12  | -0.01 | 1.06 |
| HRD22     | 5489   | NM_001212    | 7030 | 2.73  | 3.30  | 2.39  | 1.39  | 2.33  | 1.97  | 0.89  | 0.89  | 0.89  | 9.43  | 6.39  | 1.06 |
| KRT15     | 3866   | NM_002275    | 7031 | 0.04  | 0.50  | 0.27  | 0.04  | -0.05 | -0.57 | 0.10  | 0.51  | 0.45  | 0.73  | -0.57 | 1.06 |
| INTFAT2   | 4773   | NM_173091    | 7032 | 0.49  | 0.66  | 0.95  | 0.13  | -0.01 | 0.00  | 0.16  | 0.39  | 0.52  | 2.10  | 0.11  | 1.06 |
| TNLA      | 10907  | NM_006701    | 7033 | 0.95  | -0.09 | 0.65  | -0.45 | -0.77 | -0.09 | 0.72  | 0.11  | 0.21  | 1.51  | -1.28 | 1.06 |
| NM        | 911    | NM_004088    | 7034 | 0.11  | 0.22  | 0.80  | 0.18  | -0.45 | 0.53  | 0.80  | 0.69  | 0.69  | 0.69  | 0.28  | 1.06 |
| FLJ10511  | 55156  | NM_018120    | 7035 | -0.15 | 0.47  | -0.29 | -0.68 | 0.47  | -0.13 | 0.58  | 0.40  | 0.07  | 0.02  | -0.33 | 1.06 |
| KLR1C1    | 3821   | NM_213657    | 7036 | 0.52  | 0.00  | -0.03 | 0.39  | 1.24  | 0.54  | 0.53  | -0.15 | 0.68  | 0.49  | 1.08  | 1.06 |
| ACTR2     | 10927  | NM_005722    | 7037 | 0.32  | 0.08  | 0.46  | 0.12  | 0.08  | 0.16  | 0.14  | -0.03 | 0.66  | 0.65  | 2.26  | 1.06 |
| LOC9C2    | 7385   | NM_003366    | 7038 | 1.09  | 0.82  | 0.80  | -0.78 | -0.32 | 0.68  | 0.67  | 0.43  | -0.05 | 2.74  | -0.42 | 1.06 |
| LOC40093  | 440093 | NM_00103699  | 7039 | 0.43  | 0     |       |       |       |       |       |       |       |       |       |      |

|            |        |              |      |       |       |       |       |       |       |       |       |       |       |       |      |
|------------|--------|--------------|------|-------|-------|-------|-------|-------|-------|-------|-------|-------|-------|-------|------|
| AMN        | 81693  | NM_003943    | 7121 | -0.02 | -0.45 | -0.87 | -1.23 | -1.42 | -0.99 | 1.11  | 0.00  | -0.99 | -1.34 | -3.64 | 1.02 |
| BRN        | 5868   | NM_001214    | 7122 | -0.11 | 0.41  | 0.27  | -0.01 | -2.80 | 1.24  | 0.45  | 0.34  | 0.24  | 1.61  | -0.17 | 1.04 |
| CBAT       | 1384   | NM_144782    | 7123 | 0.91  | 1.05  | 0.05  | 0.37  | 0.30  | -0.58 | -0.77 | 0.58  | 1.21  | 0.19  | 0.08  | 1.02 |
| SETBP1     | 26040  | NM_001130110 | 7124 | 0.51  | 1.10  | 0.18  | -0.61 | -0.21 | -0.82 | 0.48  | 0.37  | 0.18  | 1.79  | -1.64 | 1.02 |
| FLI18A1    | 79755  | NM_024702    | 7125 | 0.66  | -0.24 | 0.45  | -0.41 | -0.27 | 0.18  | 0.82  | -0.06 | 0.26  | 0.86  | -0.50 | 1.02 |
| MAR2A      | 9682   | NM_003663    | 7126 | 0.42  | 0.10  | 0.10  | 0.16  | 0.45  | 0.63  | 0.16  | 0.36  | 0.52  | 1.56  | 0.97  | 1.02 |
| RYPB       | 23429  | NM_012234    | 7127 | -0.41 | -0.61 | -0.50 | -0.24 | -0.19 | -0.06 | 1.09  | 0.25  | -0.32 | -1.52 | -0.48 | 1.02 |
| MGAT2      | 4247   | NM_001015883 | 7128 | -0.81 | -0.88 | -1.02 | -1.74 | -1.72 | -1.77 | 0.35  | 0.23  | 0.44  | -2.70 | -5.24 | 1.02 |
| LOC440003  | 40205  | NM_00137111  | 7129 | 0.15  | 0.46  | 0.48  | -0.52 | -0.20 | 0.66  | 1.98  | -0.46 | 0.46  | 0.79  | 1.47  | 1.02 |
| NMPC2      | 9584   | NM_004902    | 7130 | -1.40 | -1.59 | -1.16 | -2.24 | -2.91 | -1.94 | 0.07  | 0.75  | 0.19  | -4.14 | -7.09 | 1.01 |
| MGC2690    | 145773 | NM_152450    | 7131 | 0.09  | 0.01  | 0.30  | 1.19  | 0.08  | 0.26  | -0.37 | 0.68  | 0.70  | 0.40  | 1.53  | 1.01 |
| ZNF90      | 7610   | NM_001138    | 7132 | 1.49  | 0.71  | 0.44  | 0.15  | -0.09 | 0.05  | 1.49  | 0.07  | 0.05  | 2.64  | 0.61  | 1.01 |
| FLI3611    | 80906  | NM_001093756 | 7133 | 0.41  | -0.08 | -0.34 | -0.60 | -0.44 | -0.29 | 0.85  | 0.16  | 0.00  | -0.02 | -1.33 | 1.01 |
| PKT1       | 222659 | NM_152990    | 7134 | 0.49  | -0.36 | 0.62  | -0.23 | 0.23  | -0.70 | 0.07  | -0.16 | 1.10  | 0.75  | -0.70 | 1.01 |
| LPN3       | 23384  | NM_015236    | 7135 | 1.42  | 0.85  | -0.10 | -0.04 | 0.67  | -0.31 | 0.90  | 0.20  | -0.99 | 2.07  | 0.33  | 1.01 |
| ASBP9      | 23204  | NM_015161    | 7136 | 0.78  | 0.38  | 1.13  | -0.30 | 0.01  | 0.75  | 0.52  | 0.32  | 0.81  | 1.53  | 0.46  | 1.01 |
| GT13       | 29105  | NM_013242    | 7137 | -0.37 | -0.10 | 0.60  | 0.33  | 0.24  | 1.21  | 0.79  | 0.42  | -0.20 | 1.13  | 1.78  | 1.01 |
| OB1E2      | 8388   | NM_003554    | 7138 | 2.46  | 1.11  | 0.80  | 0.64  | 1.27  | 1.19  | 1.20  | -0.27 | 0.08  | 4.37  | 3.10  | 1.01 |
| DN1        | 1855   | NM_181970    | 7139 | -0.12 | 0.37  | 0.78  | 0.18  | -0.24 | -0.24 | -0.03 | 0.14  | 0.90  | 0.29  | 0.31  | 1.01 |
| PKRRA      | 8575   | NM_003690    | 7140 | 2.02  | 0.92  | 1.11  | 0.61  | 0.78  | 0.34  | 0.61  | 0.11  | 0.29  | 4.05  | 1.73  | 1.01 |
| BTNL2      | 56244  | NM_019602    | 7141 | 1.95  | 0.56  | 0.75  | 1.25  | 0.35  | 1.11  | 0.78  | 0.07  | 0.16  | 3.26  | 2.71  | 1.01 |
| DACT1      | 51339  | NM_016651    | 7142 | 0.38  | 0.31  | 0.76  | -0.38 | -0.49 | -0.38 | 0.50  | 0.29  | 0.21  | 1.45  | -1.24 | 1.01 |
| KLK4       | 43847  | NM_022046    | 7143 | 0.30  | 1.08  | 0.75  | 0.72  | -0.50 | 0.22  | -0.25 | 1.16  | 0.09  | 1.93  | 0.43  | 1.01 |
| OR7D2      | 162998 | NM_175883    | 7144 | 0.27  | 1.25  | 0.84  | -0.06 | -0.27 | -0.04 | 0.16  | 0.60  | 0.24  | 2.36  | -0.37 | 1.01 |
| CDORF106   | 20252  | NM_001012971 | 7145 | -0.32 | -0.59 | -0.49 | -0.64 | -0.47 | 0.14  | 0.98  | 0.39  | -0.37 | -1.40 | -0.97 | 1.00 |
| LOC101019  | 150159 | NM_001100874 | 7146 | 0.58  | 0.98  | -0.10 | -0.61 | -0.05 | 0.56  | 0.43  | 0.57  | 0.00  | 1.46  | -1.23 | 1.00 |
| FGF1       | 2246   | NM_003137    | 7147 | 0.12  | -0.51 | -0.37 | -0.97 | -0.56 | -0.62 | 1.13  | -0.12 | -0.01 | -0.76 | -2.15 | 1.00 |
| FAM7A2     | 89839  | NM_001039841 | 7148 | -0.34 | 1.67  | -0.01 | 0.39  | 0.47  | -0.61 | -0.30 | 0.61  | 0.69  | 1.32  | 0.24  | 1.00 |
| TSGN       | 6874   | NM_003186    | 7149 | 1.35  | 0.61  | 0.61  | 0.19  | 0.65  | -0.04 | 0.19  | 0.19  | 0.22  | 2.32  | 1.14  | 1.00 |
| FRP1       | 2357   | NM_002029    | 7150 | 1.28  | 1.20  | 0.34  | -0.42 | 0.13  | 0.17  | 1.01  | 0.21  | 0.22  | 2.82  | -0.11 | 1.00 |
| CCDC8      | 83987  | NM_032040    | 7151 | 2.32  | -0.39 | 0.27  | 0.72  | 1.51  | 0.42  | 2.11  | -1.07 | -0.04 | 2.21  | 2.65  | 1.00 |
| SRF1       | 3190   | NM_001291    | 7152 | 1.68  | 0.98  | 0.87  | 0.11  | 0.62  | -0.10 | 0.42  | 0.54  | 0.12  | 2.54  | 2.12  | 1.00 |
| IGFBP3     | 3486   | NM_000598    | 7153 | 2.58  | 0.99  | 1.53  | 1.26  | 1.48  | 1.85  | 0.93  | -0.07 | 0.14  | 8.20  | 4.58  | 1.00 |
| SUCTA6     | 9057   | NM_003983    | 7154 | -0.16 | 0.20  | -0.54 | -0.54 | -0.51 | -0.31 | 0.49  | 0.70  | -0.19 | -0.49 | -1.37 | 1.00 |
| REST       | 5978   | NM_005612    | 7155 | 0.63  | -0.21 | -0.07 | -0.17 | -0.04 | -0.14 | 0.76  | 0.00  | 0.24  | 0.15  | -0.36 | 1.00 |
| LOC101926  | 27439  | NM_031890    | 7156 | 0.85  | 0.36  | -0.21 | -0.56 | -0.36 | 1.19  | -0.07 | 0.00  | 0.99  | 0.99  | -0.38 | 1.00 |
| NSFL1C     | 55968  | NM_182483    | 7157 | 0.02  | -0.31 | 0.45  | -0.79 | 0.03  | 0.38  | 0.53  | -0.15 | 0.61  | 0.17  | -0.38 | 1.00 |
| FAH        | 2184   | NM_000137    | 7158 | 0.66  | -0.72 | -1.00 | -0.27 | -1.62 | -1.00 | 0.51  | 0.88  | -0.39 | -1.06 | -2.89 | 1.00 |
| USF56      | 5497   | NM_001801    | 7159 | 0.63  | 0.17  | 0.46  | 0.17  | -0.12 | 0.47  | 0.12  | 0.67  | 0.13  | 1.22  | 0.95  | 1.00 |
| POU2       | 23649  | NM_002689    | 7160 | -0.62 | 0.18  | -0.09 | -1.36 | -1.38 | -0.68 | 0.73  | 0.37  | -0.10 | -0.53 | -3.41 | 1.00 |
| BCA52      | 10286  | NM_005872    | 7161 | 1.06  | 0.28  | 1.87  | 1.82  | 0.31  | 0.41  | -0.08 | -0.07 | 1.15  | 2.31  | 2.55  | 1.00 |
| FLI3078    | 13937  | NM_001012971 | 7162 | 1.58  | 1.10  | 1.02  | 2.59  | 1.10  | 1.02  | 2.59  | 1.10  | 1.02  | 6.81  | 4.16  | 1.00 |
| RNF128     | 79589  | NM_024539    | 7163 | 0.24  | 0.22  | -0.37 | -0.57 | -0.62 | -0.89 | 0.55  | 0.24  | 0.20  | 0.08  | -2.08 | 0.99 |
| KIAA0174   | 9798   | NM_014761    | 7164 | -0.34 | -0.31 | -0.20 | -0.98 | -1.27 | -0.84 | 0.22  | 0.56  | 0.21  | -0.85 | -3.09 | 0.99 |
| ERCC5      | 2073   | NM_000123    | 7165 | 0.10  | -0.05 | -0.25 | -0.09 | -0.91 | -0.49 | 0.00  | 0.43  | 0.56  | -0.20 | -1.50 | 0.99 |
| TEPP       | 37479  | NM_199456    | 7166 | 1.19  | 0.15  | 0.24  | -1.46 | -0.13 | 0.24  | 0.19  | 0.19  | 0.19  | 1.11  | 1.50  | 0.99 |
| ANKRD7     | 56311  | NM_019644    | 7167 | 1.10  | 0.06  | 0.11  | 0.44  | 1.87  | 0.35  | 1.41  | -0.59 | 0.17  | 1.28  | 2.67  | 0.99 |
| MIFP1      | 8720   | NM_201268    | 7168 | 1.02  | 1.53  | 1.57  | 0.85  | 0.44  | -0.17 | -0.07 | 0.49  | 0.57  | 4.13  | 1.11  | 0.99 |
| LOC101926  | 6031   | NM_021640    | 7169 | 0.29  | 0.28  | 0.05  | -0.13 | -0.07 | 0.13  | 0.27  | 0.13  | 0.27  | 0.17  | 0.20  | 0.99 |
| HE3        | 309992 | NM_01024598  | 7170 | -1.13 | -0.18 | -0.44 | -0.73 | -0.37 | -1.06 | 0.24  | 0.60  | 0.14  | -0.75 | -2.17 | 0.99 |
| MRR41      | 64975  | NM_032477    | 7171 | -0.40 | -0.46 | -0.96 | -1.01 | -0.90 | -0.81 | 0.56  | 0.44  | -0.01 | -1.81 | -2.73 | 0.99 |
| LOC101926  | 8420   | NM_001012971 | 7172 | 1.05  | 0.02  | -0.11 | 0.28  | -0.40 | -0.15 | 0.18  | 0.18  | 0.18  | -0.12 | -0.15 | 0.99 |
| COL18A1    | 80781  | NM_130445    | 7173 | -0.26 | 0.09  | 0.57  | -0.70 | 0.01  | -1.06 | -0.28 | -0.05 | 1.31  | 0.40  | -1.75 | 0.99 |
| LOC101926  | 28371  | NM_001080408 | 7174 | -0.02 | 0.30  | -0.48 | -0.05 | -0.96 | -0.72 | -0.03 | 0.91  | 0.11  | -0.20 | -1.73 | 0.99 |
| LOC647060  | 647060 | NM_001084652 | 7175 | 0.77  | 2.33  | 0.88  | 1.54  | 0.96  | 1.08  | -0.12 | 1.44  | -0.33 | 3.78  | 5.58  | 0.99 |
| LOC6       | 7387   | NM_000318    | 7176 | 1.31  | 0.55  | 0.13  | 0.01  | 0.62  | 0.62  | 0.02  | 0.62  | 0.02  | 1.73  | 0.77  | 0.99 |
| FGF20      | 26281  | NM_019851    | 7177 | 0.84  | 0.37  | 0.75  | 0.40  | -0.32 | 0.00  | 0.03  | 0.38  | 0.58  | 1.97  | 0.09  | 0.99 |
| RNF3       | 79890  | NM_024832    | 7178 | 0.72  | 0.75  | 0.46  | 0.56  | -0.39 | 0.12  | -0.01 | 0.63  | 0.36  | 1.93  | 0.29  | 0.99 |
| TM6AS1     | 25422  | NM_024266    | 7179 | 0.45  | 0.44  | 0.46  | -1.14 | -0.45 | -0.11 | 0.45  | -0.11 | 0.45  | 0.45  | 2.10  | 0.99 |
| NUR        | 14072  | NM_139018    | 7180 | -0.08 | -0.25 | -0.53 | -0.99 | 0.36  | 0.38  | 0.13  | 1.22  | 0.37  | -0.86 | 1.73  | 0.98 |
| LOC150678  | 150678 | NM_138336    | 7181 | 1.90  | 1.83  | 0.22  | 0.99  | 0.53  | 0.65  | 0.33  | 0.65  | 0.00  | 8.94  | 2.16  | 0.98 |
| ANKRD20A2  | 44430  | NM_001012971 | 7182 | 0.10  | 0.52  | 0.20  | -0.07 | 0.52  | 0.34  | 0.15  | 0.20  | 0.15  | 0.41  | 0.10  | 0.98 |
| NHBE       | 83729  | NM_031479    | 7183 | 0.38  | 0.00  | -0.23 | -0.93 | -0.96 | -0.29 | 0.65  | 0.12  | 0.20  | 0.15  | -2.18 | 0.98 |
| DKFZ434M20 | 126668 | NM_182499    | 7184 | 1.20  | 1.33  | 0.08  | 0.25  | 0.83  | -0.10 | 1.02  | 0.04  | -0.07 | 2.60  | 0.98  | 0.98 |
| PACRC      | 155138 | NM_152410    | 7185 | -0.63 | -0.86 | -0.96 | 0.53  | -0.79 | -0.89 | 0.03  | 0.39  | 0.56  | -2.38 | -1.11 | 0.98 |
| SRA1       | 9186   | NM_181869    | 7186 | 1.28  | 0.37  | 0.83  | 0.57  | 0.33  | 0.32  | 0.13  | 0.32  | 0.13  | 2.77  | 0.17  | 0.98 |
| SMAD9      | 4093   | NM_005905    | 7187 | -0.74 | -0.07 | 0.72  | 0.04  | -0.35 | 0.50  | -0.44 | 0.98  | 0.44  | -0.09 | 0.18  | 0.98 |
| FLH4831    | 399823 | NM_207426    | 7188 | -0.67 | -0.68 | -0.69 | -1.14 | -0.56 | -0.81 | 1.69  | -0.56 | -0.15 | -1.70 | -2.51 | 0.98 |
| ZAD01      | 5697   | NM_002025    | 7189 | 0.56  | 0.33  | 0.27  | 0.62  | 0.32  | 0.72  | 0.62  | 0.32  | 0.72  | 2.55  | 1.88  | 0.98 |
| TNXP       | 10628  | NM_006472    | 7190 | 0.54  | 0.51  | 0.16  | 0.01  | 0.14  | -0.13 | 0.26  | 0.55  | 0.17  | 1.20  | 0.02  | 0.98 |
| NDFUAF1    | 51103  | NM_016013    | 7191 | 2.31  | 0.58  | 0.11  | 0.13  | 1.33  | -0.12 | 0.85  | 0.05  | 0.07  | 3.00  | 1.34  | 0.98 |
| FRP1       | 5818   | NM_004286    | 7192 | 1.07  | 0.26  | 0.60  | 0.16  | 0.20  | 0.16  | 2.80  | 0.26  | 0.16  | 3.46  | 0.97  | 0.98 |
| CC11C      | 6360   | NM_004590    | 7193 | -0.70 | -0.23 | -0.40 | -0.04 | -0.67 | -0.81 | -0.35 | 0.58  | 0.74  | -1.33 | -1.52 | 0.98 |
| KRTCAP3    | 200634 | NM_173853    | 7194 | 0.49  | 0.81  | 0.67  | -0.45 | -0.04 | 0.41  | 0.30  | 0.66  | 0.01  | 1.97  | -0.08 | 0.98 |
| ATP10B     | 23120  | NM_194071    | 7195 | -0.13 | 0.19  | 0.02  | -0.86 | -1.01 | -0.77 | 0.14  | 0.63  | 0.21  | 0.07  | -1.64 | 0.97 |
| FOXD2      | 9077   | NM_014624    | 7196 | 1.28  | 0.43  | 0.27  | -0.67 | -0.67 | -0.67 | 0.16  | 0.34  | 0.16  | 1.63  | 1.30  | 0.97 |
| H2AF1      | 23381  | NM_015327    | 7197 | 0.39  | 1.84  | 1.49  | 0.67  | -0.19 | 0.50  | -0.49 | 1.22  | 0.25  | 3.71  | 0.98  | 0.97 |
| EST1B      | 55766  | NM_177925    | 7198 | 0.04  | 1.44  | 0.10  | -0.09 | -0.28 | 0.32  | 0.20  | 1.29  | -0.51 | 1.57  | -0.05 | 0.97 |
| TNKS3      | 7117   | NM_032049    | 7199 | 0.18  | 0.08  | 0.40  | 0.09  | 0.40  | 0.19  | 0.40  | 0.19  | 0.40  | 1.68  | 0.29  | 0.97 |
| FLI0539    | 55164  | NM_018130    | 7200 | -0.01 | 0.03  | -0.03 | -0.67 | -0.84 | -0.31 | 0.21  | 0.65  | 0.11  | 0.00  | -1.82 | 0.97 |
| PMA1       | 5255   | NM_002637</  |      |       |       |       |       |       |       |       |       |       |       |       |      |

|             |        |              |      |        |       |       |       |       |       |       |       |       |       |       |      |
|-------------|--------|--------------|------|--------|-------|-------|-------|-------|-------|-------|-------|-------|-------|-------|------|
| FUC1A       | 2517   | NM_000147    | 7283 | 2.32   | 1.11  | 2.00  | 0.12  | 0.70  | 0.69  | 0.66  | -0.04 | 0.31  | 5.43  | 1.41  | 0.94 |
| INSBP       | 51070  | NM_000563    | 7284 | -0.22  | -0.38 | 0.09  | -0.21 | -0.41 | 0.50  | -0.27 | -0.37 | 0.16  | -0.46 | -1.24 | 0.93 |
| C2ORF32     | 25927  | NM_001111001 | 7285 | 0.61   | 0.58  | 0.14  | -0.41 | -0.45 | -0.08 | -0.26 | 0.98  | 0.21  | 1.11  | 0.93  | 0.94 |
| INSR        | 3643   | NM_000208    | 7286 | 0.05   | 0.38  | 0.97  | 0.11  | -0.64 | -0.50 | -0.18 | 0.17  | 0.95  | 1.40  | -1.03 | 0.93 |
| ABC3        | 5825   | NM_002858    | 7287 | -0.21  | -0.18 | 0.01  | -0.31 | -0.99 | -0.32 | -0.15 | 0.94  | 0.14  | -0.38 | -1.63 | 0.93 |
| C2ORF26     | 103    | NM_078626    | 7288 | 0.70   | 0.47  | 0.34  | 0.78  | 0.17  | 0.47  | 0.17  | 0.64  | 0.31  | 1.51  | 0.72  | 0.93 |
| BRD4        | 23476  | NM_014299    | 7289 | 0.34   | 0.14  | 1.58  | 1.87  | 2.43  | 1.74  | -0.33 | 0.30  | 0.96  | 2.06  | 6.06  | 0.93 |
| GAJ         | 84057  | NM_032117    | 7290 | -1.08  | -0.89 | -0.90 | -1.24 | -1.46 | -1.00 | -0.03 | 0.70  | 0.26  | -2.87 | -3.76 | 0.93 |
| GT744       | 2341   | NM_005512    | 7291 | 0.49   | 0.11  | 0.69  | 0.41  | -0.11 | 0.56  | 0.41  | 0.56  | 0.14  | 0.56  | -0.28 | 1.58 |
| RN1         | 9610   | NM_004292    | 7292 | 2.53   | -1.17 | 1.35  | 0.46  | -1.58 | -1.01 | -0.47 | -0.58 | 1.03  | 2.71  | -1.23 | 0.93 |
| ZNF585      | 54807  | NM_017652    | 7293 | 0.08   | -0.30 | -0.80 | -0.92 | 0.14  | 0.32  | 1.54  | -0.10 | 0.51  | -1.02 | -0.46 | 0.93 |
| BC12        | 41489  | NM_00101396  | 7294 | -0.02  | -0.24 | 0.74  | -0.04 | 0.24  | 0.24  | 0.24  | 0.24  | 0.24  | -1.01 | 0.61  | 0.93 |
| FLJ2655     | 79785  | NM_024730    | 7295 | 0.03   | 0.08  | 0.54  | -0.48 | -0.71 | 0.31  | 0.07  | 0.31  | 0.55  | 0.64  | -0.87 | 0.93 |
| COL8A2      | 1296   | NM_005202    | 7296 | 0.02   | -0.22 | -0.14 | -0.70 | -0.26 | -0.28 | 0.80  | 0.22  | -0.10 | -0.34 | -1.25 | 0.93 |
| STM1        | 6786   | NM_003156    | 7297 | -0.73  | -0.55 | 0.56  | -0.70 | -0.71 | -0.42 | -0.01 | 0.46  | 0.48  | -0.73 | -1.82 | 0.93 |
| TWIST2      | 11753  | NM_057179    | 7298 | 0.60   | 0.29  | 0.09  | -0.54 | 0.89  | 0.04  | 1.63  | 0.51  | 0.19  | 0.41  | 0.31  | 0.93 |
| POP4        | 10775  | NM_006627    | 7299 | 0.68   | 0.12  | 0.48  | -0.68 | -0.25 | 0.06  | 0.51  | 0.36  | 0.06  | 1.29  | -0.87 | 0.93 |
| JAMC1       | 3915   | NM_002229    | 7300 | 0.35   | 0.44  | 1.20  | -0.12 | -0.17 | 0.52  | 0.54  | 0.15  | 0.24  | 1.99  | 0.23  | 0.93 |
| PRIS        | 55615  | NM_001017929 | 7301 | -0.59  | -0.99 | -1.06 | -1.59 | -1.73 | -1.49 | 0.76  | -0.08 | 0.25  | -2.64 | -4.81 | 0.93 |
| ICOS        | 29851  | NM_012092    | 7302 | -0.24  | -0.10 | 0.71  | 0.79  | 0.37  | -0.30 | -0.35 | 0.06  | 1.21  | 0.38  | 0.86  | 0.93 |
| NMBR        | 4829   | NM_002511    | 7303 | -0.29  | 0.24  | -0.42 | -0.86 | -0.76 | -0.59 | 0.16  | 0.97  | -0.20 | -0.47 | -2.20 | 0.93 |
| CLTA        | 1211   | NM_001833    | 7304 | 0.41   | 0.76  | -0.57 | -0.46 | -0.12 | -0.16 | 0.49  | 0.74  | -0.30 | 0.80  | -0.74 | 0.92 |
| SLC25A16    | 8034   | NM_152707    | 7305 | 0.92   | 0.60  | -0.19 | -0.50 | -0.25 | 0.08  | 0.82  | 0.36  | -0.26 | 1.33  | 0.67  | 0.92 |
| FLJ3604     | 160492 | NM_152590    | 7306 | -0.71  | -0.54 | 0.59  | -0.54 | -1.23 | -1.13 | -0.40 | 0.01  | 1.32  | -0.66 | -2.91 | 0.92 |
| MGC36468    | 199670 | NM_152660    | 7307 | 0.45   | -0.91 | -0.28 | -0.58 | -0.91 | -0.77 | 0.61  | -0.13 | 0.45  | -1.64 | -2.26 | 0.92 |
| TN43        | 7187   | NM_000300    | 7308 | 0.30   | 0.22  | 0.19  | -0.38 | -0.34 | 0.02  | 0.48  | 0.47  | 0.02  | 0.71  | -0.70 | 0.92 |
| GEORF47     | 57827  | NM_021184    | 7309 | 0.83   | 0.89  | 1.14  | 0.02  | 0.35  | 0.85  | 0.01  | 0.83  | 0.09  | 2.86  | 1.21  | 0.92 |
| GEORF102    | 221458 | NM_145027    | 7310 | -0.38  | -0.15 | -0.38 | -1.06 | 0.00  | -0.38 | 0.56  | -0.02 | 0.38  | -0.92 | -1.43 | 0.92 |
| LOC111498   | 231149 | NM_0008040   | 7311 | 1.43   | 1.29  | 0.16  | 1.14  | 0.29  | 0.47  | 0.16  | 0.16  | 0.16  | 0.86  | 0.88  | 0.92 |
| APOL5       | 80831  | NM_030642    | 7312 | -0.91  | -0.81 | -0.22 | -1.57 | -1.20 | -1.75 | -0.03 | -0.33 | 1.28  | -1.93 | -4.52 | 0.92 |
| FLJ10719    | 55215  | NM_018193    | 7313 | 1.38   | 0.70  | 2.07  | 0.08  | 0.40  | 1.03  | 0.74  | -0.03 | 0.22  | 4.14  | 1.52  | 0.92 |
| COSA2       | 1390   | NM_001309    | 7314 | -0.07  | 0.22  | -0.03 | 0.14  | 0.49  | 0.32  | -0.14 | 0.49  | 0.22  | 1.20  | 0.27  | 0.92 |
| MGC15716    | 84330  | NM_032370    | 7315 | 1.15   | -1.08 | -0.78 | -1.25 | -1.26 | -1.09 | -0.29 | 1.15  | 0.05  | -2.12 | -3.60 | 0.92 |
| PHF14       | 9678   | NM_00107157  | 7316 | 0.46   | -0.25 | -0.31 | -0.11 | -0.39 | -0.17 | -0.19 | 0.42  | 0.69  | -1.01 | -0.67 | 0.92 |
| SPG20       | 23111  | NM_015087    | 7317 | 0.68   | 0.76  | 2.90  | 0.47  | 1.10  | 0.57  | -0.20 | -0.21 | 1.31  | 4.34  | 2.14  | 0.92 |
| NUTR12      | 8354   | NM_031438    | 7318 | 0.50   | 0.16  | 0.70  | 0.54  | 0.06  | 0.54  | 0.00  | 0.16  | 0.70  | 2.97  | 1.38  | 0.92 |
| RFC-16C19.3 | 728082 | NM_001080144 | 7319 | -0.62  | -0.57 | -0.46 | -0.62 | -0.85 | -0.96 | -0.41 | 0.89  | 0.44  | -1.65 | -2.43 | 0.92 |
| ZCHDC3      | 376940 | NM_198581    | 7320 | -0.17  | -0.49 | -0.43 | -0.54 | -0.05 | -1.23 | 0.59  | -0.26 | 0.59  | -1.09 | -1.82 | 0.92 |
| TNRC5       | 7234   | NM_001471    | 7321 | 0.67   | 0.45  | 0.59  | 0.44  | 0.59  | 0.44  | 0.59  | 0.44  | 0.59  | 1.09  | 0.22  | 0.92 |
| GRK3        | 2899   | NM_000831    | 7322 | -0.20  | 0.04  | -0.03 | -1.02 | -0.72 | -0.82 | 0.29  | 0.36  | 0.26  | -0.27 | -2.56 | 0.92 |
| HEXA        | 3073   | NM_000520    | 7323 | 1.70   | 1.16  | 0.53  | 0.00  | 0.36  | -0.39 | 0.58  | 0.05  | 0.29  | 3.39  | -0.03 | 0.92 |
| CDNF11      | 13012  | NM_024629    | 7324 | 0.21   | -0.12 | 0.03  | -0.72 | -0.42 | 0.18  | -0.52 | 0.12  | -0.72 | 0.13  | -1.13 | 0.92 |
| MGC26733    | 200403 | NM_144992    | 7325 | 0.54   | 0.23  | 0.01  | -0.38 | -0.81 | 0.18  | 0.72  | 0.39  | -0.19 | 0.78  | 1.01  | 0.92 |
| MAGE345145  | 116841 | NM_053052    | 7326 | -0.33  | 0.23  | 0.04  | -0.58 | -0.37 | -0.88 | -0.31 | 0.40  | 0.82  | -0.06 | -1.83 | 0.91 |
| CARD11      | 84433  | NM_012415    | 7327 | 0.14   | 0.36  | -0.11 | -0.40 | -0.52 | -0.20 | 0.14  | 0.57  | 0.20  | 0.40  | -0.76 | 0.91 |
| DOX         | 23109  | NM_015086    | 7328 | 0.39   | 0.31  | 0.07  | 0.62  | 0.00  | 0.13  | 0.56  | 0.39  | 0.11  | 0.77  | 0.68  | 0.91 |
| AERP2       | 121536 | NM_00114176  | 7329 | 1.38   | 0.89  | 0.99  | 0.83  | 0.11  | -0.11 | -0.05 | 0.37  | 0.59  | 3.26  | 0.83  | 0.91 |
| ONTN1       | 1272   | NM_175038    | 7330 | 0.13   | 0.68  | -0.09 | -0.04 | -0.53 | -0.80 | -0.09 | 0.55  | 0.46  | 0.71  | -1.37 | 0.91 |
| TRPV1F1     | 926    | NM_004221    | 7331 | 0.78   | 0.76  | 0.74  | 0.27  | 0.86  | -0.07 | 0.14  | 0.27  | 0.14  | 1.85  | 0.12  | 0.91 |
| MARLN1      | 152789 | NM_144720    | 7332 | 0.35   | 0.04  | 0.57  | 0.04  | -0.73 | 0.89  | -0.06 | 0.85  | 0.13  | 0.96  | 0.20  | 0.91 |
| FLJ25078    | 148304 | NM_152485    | 7333 | 0.43   | 0.06  | 0.35  | -0.60 | -0.29 | -0.25 | 0.61  | -0.17 | 0.48  | 0.83  | -1.14 | 0.91 |
| LOC385929   | 340579 | NM_001013077 | 7334 | -0.18  | -0.56 | -0.46 | -0.34 | -0.15 | -0.18 | -0.62 | -0.18 | -0.26 | -1.20 | -1.12 | 0.91 |
| PBY         | 9081   | NM_004676    | 7335 | 0.02   | 1.35  | -0.18 | 0.78  | -0.31 | 0.09  | -0.33 | 1.20  | 0.05  | 1.19  | 0.55  | 0.91 |
| RELL1       | 788211 | NM_01083399  | 7336 | 0.49   | 0.24  | -0.07 | -0.48 | -0.01 | -0.61 | 0.83  | -0.26 | 0.34  | 0.67  | -1.09 | 0.91 |
| FLJ2320     | 146540 | NM_152458    | 7337 | 2.55   | 1.84  | 0.99  | 1.15  | 0.66  | 0.79  | 0.55  | 0.49  | -1.13 | 5.38  | 2.55  | 0.91 |
| FLJ32667    | 144360 | NM_152458    | 7338 | -0.10  | -0.04 | 0.71  | -0.22 | 0.43  | 0.44  | 0.00  | 0.71  | 0.63  | 0.77  | 1.89  | 0.91 |
| PNOX1       | 5316   | NM_197976    | 7339 | -0.30  | 0.07  | -0.09 | -0.74 | 0.22  | -0.24 | 0.29  | -0.08 | 0.70  | -0.32 | -0.76 | 0.91 |
| FLJ2517     | 188759 | NM_207401    | 7340 | -0.17  | 1.06  | 0.45  | -0.98 | -0.17 | -0.17 | 0.30  | 0.40  | 0.21  | 1.34  | -1.32 | 0.91 |
| ZNF70       | 7032   | NM_012916    | 7341 | 0.39   | -1.29 | 1.34  | 0.46  | -0.54 | 0.65  | 0.12  | -0.46 | 0.65  | -1.35 | 0.53  | 0.91 |
| KMOA143     | 23167  | NM_015137    | 7342 | 0.65   | 1.24  | 0.77  | 0.02  | 0.81  | 0.11  | 0.36  | 0.39  | 0.16  | 2.66  | 0.94  | 0.91 |
| DPT         | 1805   | NM_001937    | 7343 | 0.32   | -0.23 | 0.21  | -0.57 | -0.46 | -0.41 | 0.68  | -0.05 | 0.28  | 0.29  | -1.44 | 0.91 |
| LOC7        | 8317   | NM_002560    | 7344 | 0.06   | 0.27  | 0.46  | -0.06 | -0.14 | 0.06  | 0.11  | 0.00  | 0.11  | -0.01 | -1.72 | 0.91 |
| KRTAP9-3    | 83900  | NM_031962    | 7345 | 0.22   | 1.29  | 1.02  | 0.26  | 0.36  | 0.06  | -0.20 | 0.84  | 0.27  | 2.52  | 0.67  | 0.91 |
| CSF3        | 1440   | NM_172219    | 7346 | -0.90  | -0.57 | 0.19  | -1.43 | -1.25 | -1.13 | 0.13  | -0.04 | 0.81  | -1.28 | -2.55 | 0.91 |
| KMOA753     | 9651   | NM_014804    | 7347 | 0.00   | 1.08  | -0.43 | -0.56 | 0.04  | -0.38 | 0.32  | 0.59  | 0.00  | 0.65  | -0.69 | 0.91 |
| MORF43      | 84565  | NM_179793    | 7348 | 0.20   | 0.65  | 0.39  | 0.20  | 0.65  | 0.39  | 0.20  | 0.65  | 0.39  | 0.84  | 0.68  | 0.91 |
| TGM3        | 7053   | NM_003245    | 7349 | -0.07  | 0.42  | 0.27  | -0.57 | 0.17  | -0.26 | 0.13  | 0.61  | 0.17  | 0.62  | -0.66 | 0.91 |
| PTTG2       | 10744  | NM_006607    | 7350 | -0.67  | 0.04  | 1.16  | -0.86 | 0.12  | -1.49 | -0.37 | -0.24 | 1.51  | 0.54  | -2.23 | 0.91 |
| RSF5        | 623    | NM_001022    | 7351 | 0.17   | 0.61  | 0.80  | 0.45  | 0.15  | 0.68  | 0.15  | 0.68  | 0.15  | 0.68  | 0.15  | 0.91 |
| SP7         | 121340 | NM_152860    | 7352 | -0.01  | 0.72  | -0.06 | -0.58 | -0.45 | -0.67 | -0.01 | 1.08  | -0.17 | 0.65  | -1.71 | 0.90 |
| MEP1A       | 4224   | NM_005588    | 7353 | 0.87   | 1.46  | 0.44  | -0.67 | -0.03 | 0.72  | 0.38  | 0.85  | -0.33 | 2.76  | 0.02  | 0.90 |
| LOC1        | 10170  | NM_014523    | 7354 | 0.25   | 0.24  | 0.88  | 0.21  | 0.52  | 0.24  | 0.60  | 0.21  | 0.52  | 0.73  | 1.10  | 0.90 |
| ASB6        | 140459 | NM_177999    | 7355 | 2.24   | 0.79  | 1.37  | 0.94  | 0.45  | 0.59  | 0.59  | 0.05  | 0.28  | 4.40  | 2.38  | 0.90 |
| RLR2        | 8808   | NM_003854    | 7356 | 0.43   | -0.02 | 0.00  | -0.37 | -0.36 | -0.47 | 0.85  | -0.03 | 0.09  | 0.41  | -0.69 | 0.90 |
| ASHL        | 27163  | NM_014435    | 7357 | 0.00   | -0.33 | 1.13  | -0.49 | 0.21  | -0.41 | 0.15  | -0.50 | 1.25  | 0.81  | -0.69 | 0.90 |
| RFS4K       | 619    | NM_001007    | 7358 | 1.14   | 1.20  | 0.55  | 1.23  | 2.06  | 0.65  | 1.28  | 0.62  | 0.12  | 2.89  | 6.10  | 0.90 |
| FLJ1301     | 53341  | NM_018385    | 7359 | 0.42   | -0.05 | 0.09  | -0.33 | -0.65 | -0.15 | 0.11  | 0.29  | 0.51  | 0.46  | -1.13 | 0.90 |
| CYP22       | 1573   | NM_000775    | 7360 | 0.15   | -0.07 | 0.14  | -0.95 | -0.70 | -0.56 | 0.64  | -0.23 | 0.49  | 0.22  | -2.22 | 0.90 |
| SELE        | 6401   | NM_000450    | 7361 | 1.51   | 1.08  | 1.70  | 1.51  | 1.08  | 1.70  | 1.51  | 1.08  | 1.70  | 1.51  | 1.08  | 0.90 |
| CD74        | 972    | NM_001025158 | 7362 | -0.65  | 0.03  | -0.49 | -0.61 | -0.86 | -1.02 | -0.19 | 0.89  | 0.20  | -1.11 | -2.48 | 0.90 |
| JAMA2       | 3908   | NM_000426    | 7363 | 0.01</ |       |       |       |       |       |       |       |       |       |       |      |

|            |        |              |      |       |       |       |       |       |       |       |       |       |       |       |      |
|------------|--------|--------------|------|-------|-------|-------|-------|-------|-------|-------|-------|-------|-------|-------|------|
| DO1        | 1793   | NM_001039716 | 7445 | -0.71 | -1.16 | -0.77 | 1.28  | 1.20  | -1.71 | 0.06  | -0.49 | 1.77  | -2.65 | 0.78  | 0.86 |
| EBAN       | 6387   | NM_0004827   | 7446 | -0.49 | 0.98  | -0.24 | -0.39 | -0.42 | -0.49 | 0.28  | 0.49  | 0.37  | 0.40  | -1.27 | 0.80 |
| MTMT       | 123263 | NM_139242    | 7447 | 0.21  | 0.84  | 0.16  | -0.56 | -0.73 | 0.49  | 0.20  | 1.20  | -0.55 | 1.21  | 1.79  | 0.85 |
| RODI       | 9991   | NM_005156    | 7448 | 0.17  | 0.25  | 0.76  | -1.18 | 1.00  | -0.15 | 0.27  | -0.02 | 0.60  | 1.18  | 0.67  | 0.85 |
| ACAA2      | 10448  | NM_006111    | 7449 | 0.36  | -0.27 | 0.46  | 0.37  | -0.35 | -0.44 | -0.04 | -0.25 | 1.14  | 0.55  | -0.42 | 0.85 |
| ZPRT29     | 24355  | NM_0004064   | 7450 | -0.19 | 0.32  | 0.02  | -0.16 | 0.22  | -0.16 | 0.25  | 0.41  | 0.62  | 0.16  | 0.58  | 0.85 |
| KIA1698    | 80789  | NM_030628    | 7451 | 0.22  | 1.58  | 0.19  | -0.39 | 1.02  | -0.49 | 0.02  | 0.24  | 0.60  | 2.00  | 0.15  | 0.85 |
| ZNF257     | 113835 | NM_033468    | 7452 | -0.10 | -0.21 | -0.27 | -0.20 | -0.75 | -0.88 | 0.07  | 0.76  | 0.01  | -0.57 | -1.83 | 0.85 |
| HBP1       | 7494   | NM_025280    | 7453 | 0.14  | 0.84  | -0.26 | -0.14 | 0.34  | -0.30 | -0.10 | 0.58  | 0.13  | 0.95  | 1.33  | 0.85 |
| RFXP       | 5994   | NM_000538    | 7454 | 0.51  | 0.36  | 0.05  | -0.23 | 0.17  | -0.05 | 0.93  | 0.18  | -0.27 | 0.92  | -1.11 | 0.85 |
| FLI4888    | 84942  | NM_022856    | 7455 | -0.26 | -0.72 | -0.38 | -1.38 | -1.73 | -0.75 | 0.63  | 0.32  | -0.11 | -1.36 | -3.86 | 0.85 |
| LOC12181   | 9118   | NM_0020120   | 7456 | 0.56  | 1.09  | -0.20 | 0.41  | 0.20  | -0.20 | 0.11  | 0.20  | 0.41  | 1.20  | -0.77 | 0.85 |
| LRRTM2     | 26945  | NM_015564    | 7457 | 0.05  | 0.13  | 1.30  | -0.22 | -0.69 | 0.12  | -0.17 | 0.33  | 0.69  | 1.48  | -0.79 | 0.85 |
| PSMC3      | 5702   | NM_002804    | 7458 | 1.14  | 1.09  | -0.75 | 0.26  | -0.04 | 1.21  | 0.38  | 1.60  | -1.13 | 1.48  | 1.42  | 0.85 |
| ZFP912     | 478    | NM_006887    | 7459 | 1.32  | 0.35  | 1.54  | 0.72  | 0.64  | 0.89  | 0.44  | 0.32  | 0.09  | 3.21  | 2.21  | 0.85 |
| ZKSD2      | 23404  | NM_014295    | 7460 | -0.35 | 0.00  | 0.02  | -0.51 | -0.26 | 0.06  | 0.36  | 0.51  | -0.01 | 0.34  | -0.85 | 0.85 |
| OR3A4      | 390756 | NM_001005334 | 7461 | 0.38  | -0.11 | -0.18 | -0.25 | 0.47  | 0.02  | 0.52  | 0.33  | 0.00  | 0.09  | 0.66  | 0.85 |
| SLOC41     | 353189 | NM_180991    | 7462 | 0.96  | -0.55 | 0.06  | -0.67 | -0.17 | 0.12  | 1.13  | 0.13  | -0.41 | 0.47  | -0.72 | 0.85 |
| RNA59      | 390463 | NM_001001673 | 7463 | 0.57  | 0.16  | -0.30 | -1.19 | -1.31 | -0.13 | 0.55  | 0.87  | -0.58 | 0.43  | 0.64  | 0.85 |
| C13ORF23   | 80209  | NM_170719    | 7464 | 1.09  | 0.80  | 0.28  | 0.47  | 0.24  | 0.02  | 0.66  | 0.05  | 0.13  | 2.18  | 0.73  | 0.85 |
| ME3        | 10873  | NM_006680    | 7465 | 1.72  | 0.22  | -0.90 | 0.07  | 0.77  | -0.08 | 1.35  | -0.29 | -0.21 | 1.04  | 0.79  | 0.85 |
| PA3        | 5683   | NM_002278    | 7466 | 0.40  | 1.15  | 1.01  | 0.27  | -0.26 | -0.06 | -0.34 | 0.64  | 0.55  | 2.57  | -0.04 | 0.85 |
| NEO1       | 4756   | NM_002499    | 7467 | 0.30  | 0.21  | 0.03  | -0.40 | -0.33 | -1.06 | -0.12 | 0.39  | 0.57  | 0.64  | -1.79 | 0.85 |
| GLB1       | 2720   | NM_000404    | 7468 | -0.36 | -0.41 | -0.80 | -1.49 | -0.78 | -0.87 | 0.61  | 0.38  | -0.15 | -1.57 | -3.14 | 0.85 |
| IFTM1      | 8519   | NM_000641    | 7469 | -0.36 | 1.55  | 0.53  | 0.28  | 0.22  | -0.21 | -0.45 | 1.02  | 0.28  | 1.72  | 0.29  | 0.85 |
| MSF        | 416    | NM_004042    | 7470 | 2.50  | 0.02  | -0.34 | -0.77 | -0.24 | 0.10  | 1.55  | -0.28 | 0.43  | 2.18  | -0.91 | 0.85 |
| TREM5      | 124599 | NM_174892    | 7471 | 0.30  | 1.28  | 0.51  | 0.76  | -0.07 | 1.27  | 0.04  | 1.13  | -0.33 | 2.09  | 1.96  | 0.85 |
| PCDH8B5    | 56101  | NM_032099    | 7472 | -0.58 | 0.64  | -0.21 | -0.55 | 0.50  | -0.84 | -0.26 | 1.04  | 0.07  | -0.16 | -0.89 | 0.84 |
| ZNF387     | 23656  | NM_000685    | 7473 | 1.14  | 0.85  | 0.11  | 0.65  | 0.52  | 0.67  | 0.69  | 0.52  | 0.17  | 2.29  | 1.36  | 0.84 |
| CNOLA      | 26504  | NM_020184    | 7474 | 1.79  | 1.46  | 1.70  | 0.40  | 1.30  | 0.99  | 0.50  | -0.03 | 0.37  | 4.95  | 2.69  | 0.84 |
| C9ORF7     | 11094  | NM_001135775 | 7475 | 0.96  | -0.25 | -0.33 | -0.20 | 0.28  | 0.81  | 1.70  | -0.55 | -0.31 | 3.88  | 0.88  | 0.84 |
| LOC102102  | 40010  | NM_000611    | 7476 | 1.44  | 1.12  | 0.32  | 0.49  | 0.68  | 0.11  | 1.44  | 0.12  | 0.81  | 3.87  | 0.84  | 0.84 |
| F11        | 2160   | NM_019559    | 7477 | 1.10  | 0.35  | 0.49  | 0.75  | 0.07  | 0.69  | 0.07  | 0.24  | 0.53  | 1.95  | 1.51  | 0.84 |
| ANKRD3     | 54101  | NM_020639    | 7478 | -0.28 | -0.06 | 0.35  | -0.29 | -0.71 | -0.64 | 0.11  | 0.14  | 0.59  | 0.01  | -1.64 | 0.84 |
| R1AD4E3    | 23262  | NM_015216    | 7479 | 0.05  | 0.82  | 0.51  | 0.76  | 0.81  | -0.15 | 0.03  | -0.12 | 0.93  | 1.19  | 1.42  | 0.84 |
| ZKOR6      | 6277   | NM_014024    | 7480 | 0.20  | 0.49  | 0.10  | 0.46  | 0.39  | 0.49  | 0.81  | 0.20  | 0.39  | 0.92  | 0.94  | 0.84 |
| HDXA6      | 3203   | NM_024014    | 7481 | 0.31  | 0.22  | 1.01  | 0.43  | 1.09  | 0.54  | 0.24  | -0.29 | 0.89  | 1.54  | 2.06  | 0.84 |
| PGM5       | 5239   | NM_021965    | 7482 | 0.14  | 0.56  | 0.77  | 1.03  | -0.22 | 0.58  | -0.27 | 0.76  | 0.35  | 1.47  | 1.39  | 0.84 |
| IFT1       | 3183   | NM_0152713   | 7483 | 0.85  | 0.88  | 0.57  | 0.62  | 0.57  | 0.62  | 0.62  | 0.57  | 0.62  | 2.95  | 1.86  | 0.84 |
| RABGAP1    | 23637  | NM_012197    | 7484 | -0.53 | 0.45  | -0.50 | -1.41 | -0.71 | -0.95 | 0.55  | -0.36 | 0.65  | -1.48 | -3.06 | 0.84 |
| PPP1R3C    | 5507   | NM_005398    | 7485 | -0.27 | 0.07  | 0.18  | -0.85 | -1.08 | -0.90 | -0.06 | 0.45  | 0.45  | -0.03 | -2.82 | 0.84 |
| ZNF106D1C1 | 79179  | NM_0002736   | 7486 | 0.85  | 0.30  | -0.42 | 0.37  | 0.82  | 0.10  | 0.87  | 0.10  | 0.87  | 2.57  | 2.20  | 0.84 |
| UNC5D      | 137970 | NM_080872    | 7487 | 0.40  | 1.39  | 0.08  | 1.38  | 1.06  | 0.01  | 0.28  | -0.13 | 0.68  | 1.43  | 3.06  | 0.84 |
| C10ORF121  | 79183  | NM_01039399  | 7488 | 1.88  | 0.75  | 0.98  | -0.03 | 0.21  | 0.18  | 0.76  | -0.09 | 0.17  | 3.61  | 0.36  | 0.84 |
| C10ORF7    | 8872   | NM_006623    | 7489 | 0.99  | 0.00  | 1.97  | 0.24  | 0.50  | 0.24  | 0.35  | -0.39 | 0.87  | 2.96  | 0.97  | 0.84 |
| TRAF3      | 2004   | NM_000230    | 7490 | 0.56  | 1.04  | 0.01  | 0.17  | -0.59 | 1.12  | 0.23  | 0.17  | 1.49  | 0.49  | 0.49  | 0.84 |
| A1ML1      | 55057  | NM_01039775  | 7491 | 0.89  | 1.16  | -0.23 | 0.28  | -0.25 | -0.16 | 0.88  | 0.37  | -0.42 | 1.82  | -0.13 | 0.84 |
| ADAMT55    | 11096  | NM_007038    | 7492 | 0.41  | 2.05  | 1.17  | 0.18  | 0.62  | 0.76  | 0.07  | 0.85  | -0.06 | 3.63  | 1.55  | 0.84 |
| ZNF53A     | 7215   | NM_005660    | 7493 | 0.56  | 0.91  | 0.21  | 0.51  | 0.78  | 0.21  | 0.51  | 0.78  | 0.21  | 1.57  | 1.00  | 0.84 |
| PSORS1C2   | 170580 | NM_014069    | 7494 | -0.03 | 0.71  | 0.24  | 0.14  | 0.18  | -0.20 | -0.18 | 0.68  | 0.33  | 0.92  | 0.12  | 0.83 |
| HPSP901    | 7184   | NM_003299    | 7495 | 0.98  | 3.43  | 1.90  | 0.65  | 1.44  | 2.39  | 0.02  | 1.15  | -0.34 | 6.31  | 4.48  | 0.83 |
| FAM83B     | 5489   | NM_006384    | 7496 | -0.77 | -1.47 | -1.08 | -1.87 | -1.07 | -0.48 | -0.87 | -1.07 | -0.48 | -3.01 | -4.12 | 0.83 |
| TBM28      | 10155  | NM_005762    | 7497 | 18.77 | 19.36 | 18.02 | 13.07 | 11.62 | 13.77 | 0.83  | -0.12 | 0.13  | 56.14 | 38.10 | 0.83 |
| SOS1       | 6654   | NM_005633    | 7498 | 0.01  | -0.14 | -0.41 | -0.24 | -0.72 | -0.53 | 0.36  | 0.51  | -0.04 | -0.25 | -1.49 | 0.83 |
| PI3D       | 10437  | NM_006132    | 7499 | 0.37  | 0.18  | 0.00  | -0.12 | -0.62 | -0.86 | 0.23  | 0.21  | 0.39  | 0.18  | -1.61 | 0.83 |
| RNA1599    | 84959  | NM_029873    | 7500 | 1.24  | 1.63  | 1.89  | 0.63  | 1.32  | 1.90  | 0.63  | 1.32  | 1.90  | 4.17  | 3.68  | 0.83 |
| CEORF25    | 80739  | NM_138275    | 7501 | 0.15  | 0.66  | 0.04  | 1.15  | 1.75  | 0.59  | -0.02 | -0.16 | 1.01  | 1.74  | 3.48  | 0.83 |
| MTHFDL2    | 441024 | NM_001004346 | 7502 | 0.91  | 0.43  | 0.36  | -0.09 | 0.15  | -0.32 | 0.50  | -0.02 | 0.35  | 1.70  | -0.26 | 0.83 |
| LOC10738   | 140107 | NM_000611    | 7503 | 0.36  | 0.61  | 0.68  | 0.36  | 0.61  | 0.68  | 0.36  | 0.61  | 0.68  | 0.93  | 0.44  | 0.83 |
| SGSM1      | 8878   | NM_003900    | 7504 | -0.18 | 0.42  | 0.06  | -0.58 | -0.81 | -0.34 | -0.12 | 0.84  | 0.10  | 0.30  | -1.73 | 0.83 |
| ZNF495     | 79149  | NM_024003    | 7505 | 0.92  | 0.74  | 0.98  | 0.50  | 0.42  | -0.31 | -0.20 | 0.30  | 0.73  | 2.64  | -0.22 | 0.83 |
| TNFR1L     | 33976  | NM_017856    | 7506 | 0.05  | -0.15 | -0.55 | -0.10 | -0.51 | -0.99 | 0.75  | -0.51 | -0.99 | -0.62 | -2.01 | 0.83 |
| CPN2       | 1370   | NM_027998    | 7507 | -1.10 | -0.29 | -0.93 | -1.69 | -0.84 | -1.04 | 0.68  | 0.65  | -0.50 | 1.74  | 3.47  | 0.83 |
| GLS        | 2744   | NM_014905    | 7508 | 1.05  | 0.81  | -0.17 | -0.07 | 0.33  | 0.13  | 0.75  | 0.37  | -0.29 | 1.68  | 0.39  | 0.83 |
| CDH7       | 1005   | NM_033646    | 7509 | 0.97  | 0.75  | 1.70  | 0.11  | 1.20  | 1.43  | 0.83  | -0.17 | 1.17  | 3.42  | 2.74  | 0.83 |
| PTFR       | 632    | NM_001015    | 7510 | 0.32  | 0.19  | 0.21  | -0.12 | -0.19 | -0.20 | 0.13  | -0.19 | -0.20 | 0.30  | 0.98  | 0.83 |
| BN1        | 274    | NM_139351    | 7511 | -0.72 | 0.56  | 0.13  | -0.73 | -0.37 | -0.64 | 0.17  | 0.59  | 0.06  | -0.03 | -1.74 | 0.83 |
| MA-1       | 23526  | NM_012292    | 7512 | 0.49  | -0.12 | -0.51 | 0.20  | 0.40  | 0.19  | 1.31  | -0.40 | -0.09 | -0.15 | 0.79  | 0.83 |
| TRAF3      | 586    | NM_000299    | 7513 | 1.44  | 1.04  | 1.00  | 0.67  | 1.14  | 1.04  | 0.67  | 1.14  | 1.04  | 4.47  | 2.81  | 0.83 |
| MIR69F     | 219928 | NM_145015    | 7514 | -1.34 | -1.05 | -0.92 | -0.67 | -1.05 | -1.43 | -0.40 | -0.15 | 1.08  | -3.32 | -1.15 | 0.83 |
| MOGAT1     | 116255 | NM_058165    | 7515 | -0.06 | 0.69  | 0.79  | 0.69  | 0.11  | 0.26  | -0.19 | 0.32  | 0.70  | 1.42  | 1.06  | 0.83 |
| SLC2A3     | 1809   | NM_0013403   | 7516 | 1.00  | -0.14 | 0.10  | 0.72  | 0.40  | -0.14 | 0.72  | 0.40  | -0.14 | 0.75  | -0.67 | 0.83 |
| SLC2A3     | 1811   | NM_000111    | 7517 | 0.26  | 0.09  | 0.03  | 0.11  | -0.34 | -0.67 | 0.07  | 0.34  | 0.41  | 0.89  | 0.89  | 0.82 |
| FLI1243    | 79888  | NM_024830    | 7518 | -0.22 | 0.66  | 1.18  | 0.63  | -0.01 | 0.25  | -0.34 | 0.58  | 0.58  | 1.62  | 0.87  | 0.82 |
| FLI1097    | 55279  | NM_018293    | 7519 | -0.25 | 0.47  | 0.36  | 0.30  | -0.08 | 0.12  | -0.23 | 0.55  | 0.50  | 1.58  | 0.14  | 0.82 |
| SLC40A4    | 23514  | NM_001003094 | 7520 | 1.05  | 0.30  | 0.03  | 0.27  | 0.30  | 0.85  | -0.09 | 0.10  | 0.31  | 1.33  | 0.60  | 0.82 |
| CLDN5      | 7122   | NM_003277    | 7521 | 0.39  | -0.08 | 0.30  | -1.15 | -0.48 | -0.91 | 0.84  | 0.03  | -0.04 | 0.61  | -2.54 | 0.82 |
| GPR174     | 84636  | NM_032553    | 7522 | 0.86  | 0.97  | 0.11  | 0.04  | 0.33  | -0.10 | 0.31  | 0.08  | 0.44  | 1.93  | 0.27  | 0.82 |
| PTD12      | 2893   | NM_000409    | 7523 | 0.29  | 0.49  | 0.29  | 0.17  | 0.25  | 0.17  | 0.25  | 0.17  | 0.25  | 0.56  | 0.23  | 0.82 |
| SLC16A4    | 9122   | NM_004696    | 7524 | 0.67  | 0.06  | 0.00  | 0.26  | 0.16  | -0.54 | 0.48  | 0.11  | 0.23  | 0.72  | 0.44  | 0.82 |
| NFA        | 4774   | NM_005995    | 7525 |       |       |       |       |       |       |       |       |       |       |       |      |

|             |        |              |      |       |       |       |       |       |       |       |       |       |       |       |      |
|-------------|--------|--------------|------|-------|-------|-------|-------|-------|-------|-------|-------|-------|-------|-------|------|
| C10RF35     | 8834   | NM_003876    | 7607 | 0.30  | 0.67  | -0.13 | 0.31  | -0.03 | -1.13 | -0.43 | 0.31  | 0.41  | 0.84  | -0.85 | 0.79 |
| FRX1        | 5872   | NM_024658    | 7608 | -0.58 | 0.40  | -0.15 | 0.48  | -0.18 | 0.17  | -0.07 | 1.37  | 0.02  | 1.01  | 0.46  | 0.68 |
| KAA0861     | 22835  | NM_014888    | 7609 | 0.40  | 1.04  | -0.64 | -0.71 | -0.53 | 0.12  | 0.42  | 0.76  | -0.39 | 0.00  | -1.12 | 0.79 |
| MGC16385    | 92806  | NM_145039    | 7610 | 0.91  | -0.36 | -0.07 | -0.39 | 0.01  | 0.38  | 1.85  | -0.67 | -0.39 | 0.63  | 0.00  | 0.79 |
| MSN         | 44478  | NM_002444    | 7611 | 0.37  | 1.49  | -0.40 | -0.64 | -0.28 | -0.88 | 0.30  | 0.71  | -0.22 | 0.47  | -1.79 | 0.79 |
| MZF514      | 64476  | NM_017928    | 7612 | 0.28  | 0.35  | -0.31 | 0.12  | 0.28  | 0.35  | 0.17  | 0.26  | 0.57  | 0.24  | 1.30  | 0.79 |
| C14ORF130   | 55148  | NM_175748    | 7613 | 2.29  | 0.60  | 0.28  | 0.32  | 0.33  | 1.41  | 1.18  | -0.08 | -0.31 | 3.17  | 2.05  | 0.79 |
| OID0AG1     | 28270  | NM_001005491 | 7614 | 0.16  | -0.53 | -0.06 | -0.43 | 0.14  | -0.13 | 0.86  | -0.07 | 0.00  | -0.43 | -0.43 | 0.79 |
| LOC4974605  | 49746  | NM_001005491 | 7615 | 0.37  | 0.58  | 0.41  | 0.38  | -0.13 | 0.33  | 0.06  | -0.03 | 0.28  | 0.62  | 0.00  | 0.79 |
| BMPP2       | 659    | NM_001204    | 7616 | -0.03 | -0.03 | -0.14 | -0.18 | 0.08  | -0.37 | 0.22  | 0.00  | 0.56  | -0.20 | -0.47 | 0.78 |
| G0H1        | 21940  | NM_145657    | 7617 | 0.01  | -0.44 | -0.14 | 0.00  | 0.34  | -0.45 | 0.67  | -0.38 | 0.49  | -0.57 | -0.11 | 0.78 |
| PF03        | 5178   | NM_020210    | 7618 | 1.08  | 1.04  | 1.13  | 0.91  | 1.04  | 1.16  | 0.91  | 1.16  | 0.91  | 1.47  | 1.64  | 0.78 |
| PFM         | 5113   | NM_000289    | 7619 | -0.78 | -0.31 | -0.14 | -0.12 | -0.99 | -0.32 | -0.32 | -0.18 | 0.93  | -0.99 | -1.43 | 0.78 |
| BTBD4       | 140085 | NM_025224    | 7620 | -0.26 | -0.78 | 0.74  | -0.08 | -0.39 | -0.50 | 0.16  | -0.39 | 1.01  | -0.30 | -0.96 | 0.78 |
| ASS         | 10557  | NM_005763    | 7621 | -1.14 | 1.15  | 0.21  | -0.02 | 0.06  | 0.89  | -0.08 | 1.03  | -0.17 | 1.23  | 0.93  | 0.78 |
| PF061       | 65062  | NM_001000113 | 7622 | 0.28  | 0.91  | 0.26  | 0.17  | -0.05 | 0.56  | -0.15 | 0.53  | 0.41  | 1.46  | 0.45  | 0.78 |
| CNTNAP2     | 26047  | NM_001411    | 7623 | 1.79  | 2.27  | 1.21  | 2.32  | 0.93  | 0.39  | -0.01 | 0.61  | 0.18  | 5.27  | 3.64  | 0.78 |
| BARD1       | 580    | NM_000465    | 7624 | 0.64  | 0.50  | 1.07  | 0.25  | 0.16  | 0.44  | 0.12  | 0.03  | 0.63  | 2.20  | 0.36  | 0.78 |
| PRP1        | 5626   | NM_000261    | 7625 | 0.29  | 0.70  | -0.09 | -0.43 | -0.39 | -0.80 | 0.21  | 0.26  | 0.21  | 1.01  | 1.62  | 0.78 |
| BP11        | 80341  | NM_025227    | 7626 | -0.04 | 0.35  | -0.24 | 0.04  | -0.12 | -0.71 | 0.01  | 0.32  | 0.44  | 0.98  | -0.79 | 0.78 |
| PF08        | 26353  | NM_014365    | 7627 | 0.39  | 0.12  | 0.40  | -0.73 | -0.03 | 0.46  | 0.57  | 0.19  | 0.02  | 0.91  | -0.30 | 0.78 |
| TCTE1       | 6998   | NM_000520    | 7628 | -0.16 | 0.52  | 0.22  | -0.34 | -0.62 | -0.14 | -0.31 | 0.79  | 0.30  | 0.58  | -1.10 | 0.78 |
| FBW8        | 26259  | NM_012174    | 7629 | 0.49  | 0.50  | 0.09  | -0.34 | -0.26 | -0.76 | 1.27  | -0.66 | 0.17  | -0.10 | -1.36 | 0.78 |
| NIPSNAP1    | 8508   | NM_003634    | 7630 | 1.07  | 2.94  | 1.12  | 0.69  | 0.43  | 0.49  | -0.04 | 0.74  | 0.07  | 5.12  | 1.60  | 0.78 |
| C10ORF78    | 119592 | NM_001002759 | 7631 | 1.16  | 0.36  | 0.66  | -0.12 | -0.29 | -0.38 | 0.23  | 0.36  | 0.40  | 2.18  | -0.79 | 0.78 |
| CARL        | 23729  | NM_013276    | 7632 | 0.22  | 0.33  | -0.40 | 0.41  | -0.57 | -0.81 | 0.02  | 0.87  | 0.11  | 0.15  | -1.51 | 0.78 |
| HB-1        | 57824  | NM_021182    | 7633 | -0.26 | -0.55 | -0.12 | -0.66 | -0.02 | -0.12 | 0.96  | -0.31 | 0.13  | -0.94 | -0.80 | 0.78 |
| HSCARG      | 57407  | NM_020677    | 7634 | 0.51  | 0.41  | 0.21  | 0.17  | -0.10 | 1.73  | 0.87  | 0.45  | -0.54 | 1.13  | 1.45  | 0.78 |
| HA4         | 205    | NM_0101973   | 7635 | 0.02  | 0.14  | -0.08 | 0.01  | 0.65  | 0.20  | 0.65  | 0.01  | 0.07  | 0.07  | 0.81  | 0.78 |
| MFRP        | 83552  | NM_013433    | 7636 | -0.56 | -1.00 | -0.46 | -1.60 | -1.60 | -1.65 | 0.61  | -0.05 | 0.21  | -2.20 | -4.85 | 0.78 |
| SCLC5       | 6510   | NM_005628    | 7637 | 0.39  | 0.62  | -0.17 | -0.60 | 0.16  | -0.52 | 0.45  | 0.14  | 0.18  | 0.85  | -0.96 | 0.77 |
| IT17        | 2359   | NM_004879    | 7638 | 0.55  | -0.13 | 1.71  | 0.38  | -0.22 | 1.17  | 0.12  | -0.22 | 1.17  | 2.13  | 1.88  | 0.77 |
| DNF2P47C176 | 55531  | NM_018712    | 7639 | 0.42  | 0.05  | 0.30  | -0.68 | -0.91 | -0.01 | 0.12  | 0.66  | 0.00  | 0.67  | -1.00 | 0.77 |
| CSMD3       | 114788 | NM_025900    | 7640 | 1.39  | 1.65  | 1.25  | 0.55  | 1.28  | 2.12  | 0.23  | 0.41  | 1.14  | 3.28  | 3.95  | 0.77 |
| COL19A1     | 1310   | NM_001858    | 7641 | 0.91  | -0.23 | 0.23  | -0.28 | -0.01 | 0.53  | 1.65  | -0.53 | -0.36 | 1.90  | 0.23  | 0.77 |
| PRG1        | 5592   | NM_000628    | 7642 | 0.28  | 0.74  | 0.07  | 0.42  | 0.13  | 0.37  | 0.13  | 0.37  | 0.42  | 1.06  | 0.18  | 0.77 |
| KIAA1271    | 57506  | NM_020746    | 7643 | 1.02  | 1.37  | 1.76  | 1.65  | 0.96  | 0.36  | -0.02 | 0.29  | 0.50  | 4.15  | 2.97  | 0.77 |
| NYF         | 4802   | NM_014223    | 7644 | 1.24  | 0.72  | 0.26  | 0.08  | 1.04  | 0.09  | 0.55  | 0.13  | 0.09  | 2.22  | 1.05  | 0.77 |
| C12ORF208   | 234459 | NM_013940    | 7645 | 1.24  | 1.43  | 1.43  | 1.05  | -0.47 | 0.43  | 1.05  | -0.47 | 0.43  | 2.83  | 1.26  | 0.77 |
| HMGR        | 3156   | NM_000859    | 7646 | 0.46  | 0.31  | 0.39  | 0.06  | -0.60 | -0.13 | -0.03 | 0.51  | 0.29  | 1.16  | -0.68 | 0.77 |
| IA7         | 117157 | NM_053282    | 7647 | -0.11 | 1.38  | -0.29 | 1.35  | 1.22  | 0.42  | -0.11 | 0.93  | -0.05 | 0.98  | 2.98  | 0.77 |
| AP2         | 8498   | NM_001606    | 7648 | 1.08  | -0.12 | 0.27  | 0.66  | -0.12 | 0.08  | 0.18  | -0.22 | 0.69  | 0.69  | -0.85 | 0.77 |
| ENDOG1      | 9941   | NM_005107    | 7649 | 2.05  | 1.79  | -0.95 | 0.33  | 0.92  | -0.89 | 0.88  | 0.22  | -0.32 | 2.89  | 0.36  | 0.77 |
| GIAT        | 10552  | NM_005497    | 7650 | 0.26  | 2.02  | 1.18  | 1.55  | 1.40  | 3.30  | -0.24 | 1.17  | -0.16 | 3.46  | 6.25  | 0.77 |
| PLC2        | 10709  | NM_006422    | 7651 | 0.34  | 0.47  | 0.84  | 1.10  | 0.54  | 0.28  | -0.25 | 0.57  | 0.45  | 1.66  | 1.92  | 0.77 |
| 513R        | 51388  | NM_016201    | 7652 | 0.91  | 0.75  | 0.85  | 0.61  | 0.75  | 0.85  | 0.61  | 0.75  | 0.85  | 2.51  | 3.12  | 0.77 |
| CACNB2      | 783    | NM_201572    | 7653 | -0.61 | -0.35 | 0.02  | -0.71 | -0.83 | -1.27 | -0.12 | 0.01  | 0.89  | -0.95 | -2.81 | 0.77 |
| MCM10       | 55388  | NM_018518    | 7654 | 1.52  | 1.43  | 1.67  | 1.12  | 0.58  | 0.23  | 0.35  | 0.06  | 0.36  | 4.61  | 0.92  | 0.77 |
| 5587        | 5587   | NM_018518    | 7655 | 0.94  | 0.68  | 0.64  | 0.64  | 0.64  | 0.64  | 0.64  | 0.64  | 0.64  | 1.44  | 1.47  | 0.77 |
| ATP1B2      | 482    | NM_001678    | 7656 | 0.25  | 0.20  | 1.13  | -0.61 | -0.01 | -0.56 | 0.49  | -0.40 | 0.68  | 1.63  | -1.18 | 0.77 |
| HAO2        | 51379  | NM_016527    | 7657 | 2.20  | 0.08  | -0.42 | 0.37  | 1.61  | 0.81  | 2.12  | 0.68  | -0.67 | 1.86  | 2.79  | 0.77 |
| C12L        | 2520   | NM_020289    | 7658 | 1.41  | 0.70  | 0.36  | 0.65  | 0.70  | 0.36  | 1.90  | 0.70  | 0.36  | 2.58  | 1.25  | 0.77 |
| KLF12       | 11278  | NM_016285    | 7659 | -0.31 | 1.12  | 1.70  | 0.48  | 1.13  | 1.22  | 1.10  | -0.76 | 0.10  | 3.51  | 2.84  | 0.77 |
| LOC4P341154 | 26100  | NM_01033520  | 7660 | 1.40  | 1.04  | 1.12  | 0.67  | 1.32  | 1.60  | 0.81  | 0.49  | -0.54 | 3.56  | 3.58  | 0.77 |
| PM3E1       | 5720   | NM_006263    | 7661 | 0.98  | 0.57  | 1.77  | 1.12  | 1.14  | 0.45  | -0.23 | -0.02 | 1.01  | 3.33  | 2.91  | 0.77 |
| SGP         | 39255  | NM_001001557 | 7662 | 0.11  | -0.10 | 0.10  | 0.13  | -0.41 | 0.55  | 0.81  | -0.41 | 1.50  | 0.11  | 0.33  | 0.76 |
| FLH3377     | 205147 | NM_001105195 | 7663 | 0.78  | -0.76 | 0.08  | -0.44 | -0.36 | -0.56 | 0.69  | -0.82 | 0.90  | 0.11  | -1.37 | 0.76 |
| TRM29       | 23650  | NM_058193    | 7664 | 4.11  | 5.89  | 3.74  | 1.70  | 0.46  | 1.49  | 0.14  | 0.55  | 0.07  | 13.74 | 3.66  | 0.76 |
| MSCN1       | 7458   | NM_018992    | 7665 | 1.55  | 1.17  | 0.88  | 0.55  | 0.48  | 0.12  | 0.18  | 0.88  | 0.03  | 0.31  | 0.76  |      |
| RAB14       | 51552  | NM_016322    | 7666 | 1.08  | 0.88  | 0.71  | 0.89  | 0.11  | 0.55  | 0.18  | 0.75  | -0.17 | 2.67  | 1.54  | 0.76 |
| FBK12       | 28307  | NM_203173    | 7667 | 0.25  | 0.88  | 0.41  | 0.00  | 0.81  | 0.78  | 0.27  | 0.61  | -0.12 | 1.54  | 1.59  | 0.76 |
| FRD21       | 5439   | NM_003233    | 7668 | -0.08 | 0.85  | -0.25 | -0.46 | 0.11  | -0.33 | 0.38  | 0.60  | -0.23 | 0.52  | -0.76 | 0.76 |
| ATP0A       | 57194  | NM_024490    | 7669 | 0.02  | 0.10  | -0.02 | 0.33  | -0.65 | -0.65 | -0.04 | 0.10  | 0.70  | 0.10  | -0.70 | 0.76 |
| THAP11      | 57215  | NM_020457    | 7670 | 0.18  | 0.70  | 0.28  | 0.14  | 0.14  | 0.14  | 0.49  | 0.41  | -0.14 | 1.16  | 0.18  | 0.76 |
| FAM31B      | 163486 | NM_144977    | 7671 | 1.73  | 4.28  | 2.56  | 1.93  | 1.94  | 2.90  | -0.01 | 0.77  | 0.00  | 8.85  | 6.77  | 0.76 |
| C11ORF10    | 11970  | NM_138797    | 7672 | 0.59  | 0.36  | 0.16  | 0.36  | 0.36  | 0.16  | 0.36  | 0.36  | 0.16  | 0.99  | 0.31  | 0.76 |
| APM-1       | 20101  | NM_113971    | 7673 | -0.59 | -0.50 | -0.84 | -1.16 | -0.61 | -1.42 | 0.20  | -0.04 | 0.60  | -1.92 | -3.19 | 0.76 |
| SULT1C2     | 27233  | NM_006588    | 7674 | -0.48 | -0.93 | 0.24  | -1.68 | -1.30 | -1.14 | 0.54  | -0.08 | 0.29  | -1.18 | -4.12 | 0.76 |
| C19ORF11    | 51303  | NM_018593    | 7675 | 0.78  | 0.45  | 0.47  | 0.54  | 0.47  | 0.45  | 0.47  | 0.45  | 0.47  | 1.40  | 0.61  | 0.76 |
| HNRP12      | 221092 | NM_495877    | 7676 | -0.42 | 1.95  | 1.75  | 0.71  | 1.09  | 0.05  | -0.47 | -0.25 | 0.98  | 3.29  | 1.85  | 0.76 |
| DOX56       | 54606  | NM_019082    | 7677 | 0.57  | 0.29  | 0.55  | -0.25 | -0.27 | 0.23  | 0.54  | 0.35  | -0.13 | 1.40  | -0.30 | 0.76 |
| NPPL5       | 4808   | NM_001646    | 7678 | 1.01  | 0.73  | 1.09  | 0.83  | 0.78  | 0.03  | 0.42  | 0.12  | 0.46  | 2.93  | 1.05  | 0.76 |
| ADAR1       | 104    | NM_015834    | 7679 | -0.67 | 0.41  | -0.77 | -1.48 | -0.68 | -0.87 | 0.51  | 0.60  | -0.36 | -1.85 | -0.30 | 0.76 |
| ATP5I       | 521    | NM_007100    | 7680 | 0.02  | -0.32 | -0.65 | -0.41 | -0.93 | -0.46 | 0.39  | 0.32  | 0.04  | -0.96 | -1.79 | 0.76 |
| C12ORF4     | 29980  | NM_015511    | 7681 | 0.29  | 1.04  | 0.00  | 1.04  | 0.40  | 0.05  | -0.25 | 1.08  | -0.07 | 1.33  | 1.49  | 0.76 |
| FTZ         | 343    | NM_001547    | 7682 | 0.42  | 1.51  | 0.63  | 0.34  | 0.55  | 1.00  | 0.20  | 1.04  | 0.56  | 2.55  | 1.89  | 0.76 |
| C10RF6      | 56893  | NM_020131    | 7683 | -0.63 | -0.40 | -0.54 | -0.72 | -0.42 | -0.73 | 0.37  | 0.14  | 0.25  | -0.98 | -1.88 | 0.75 |
| FBX39       | 162517 | NM_153230    | 7684 | -0.01 | -0.30 | -0.42 | 0.99  | 1.05  | 0.46  | -0.54 | 1.49  | -0.20 | -1.33 | 2.49  | 0.75 |
| STB         | 670    | NM_000347    | 7685 | 0.28  | 0.40  | 0.40  | 0.28  | 0.40  | 0.40  | 0.28  | 0.40  | 0.40  | 0.46  | 0.91  | 0.75 |
| FLH382      | 148534 | NM_152487    | 7686 | 0.07  | 0.56  | 0.31  | 0.43  | -0.74 | -0.40 | -0.26 | 0.75  | 0.26  | 0.94  | 0.71  | 0.75 |
| MGC50721    | 255762 | NM_173806    | 7687 | 0.03  | 1.05  |       |       |       |       |       |       |       |       |       |      |



|             |        |              |      |       |       |       |       |       |       |       |       |       |       |       |      |
|-------------|--------|--------------|------|-------|-------|-------|-------|-------|-------|-------|-------|-------|-------|-------|------|
| OH1H1       | 8165   | NM_001005239 | 7769 | 0.36  | 0.33  | -0.46 | -0.57 | -0.47 | 0.32  | 0.72  | 0.39  | -0.40 | 0.23  | -0.72 | 0.71 |
| HPF3        | 2289   | NM_001005235 | 7770 | -0.02 | 0.30  | -0.05 | -0.47 | 0.25  | 0.34  | -0.85 | -0.55 | -0.24 | 0.29  | -0.36 | 0.51 |
| HTRA        | 3360   | NM_199463    | 7771 | 0.62  | -0.18 | -0.36 | 0.41  | -0.23 | -0.67 | 0.27  | 0.30  | 0.14  | 0.99  | -0.32 | 0.71 |
| ACTR6       | 64431  | NM_022496    | 7772 | 0.52  | 0.19  | 0.28  | -0.68 | 0.77  | 0.22  | 0.32  | 0.04  | 0.34  | 0.29  | 0.30  | 0.70 |
| LOC124976   | 124976 | NM_001124758 | 7773 | 0.31  | 1.29  | -0.45 | -0.41 | 0.45  | -0.10 | 0.26  | 0.64  | -0.20 | 1.15  | -0.06 | 0.70 |
| MSKBP3      | 60474  | NM_001005236 | 7774 | 0.90  | 0.79  | 0.38  | 0.32  | 0.20  | 0.32  | 0.68  | 0.49  | 0.47  | 0.07  | 1.28  | 0.70 |
| LRC3        | 81343  | NM_030891    | 7775 | -0.87 | -0.67 | -1.02 | -1.37 | -1.59 | -1.52 | 0.38  | 0.34  | 0.74  | -2.55 | -1.48 | 0.70 |
| HSFC105     | 93517  | NM_145168    | 7776 | 0.48  | 0.57  | -0.70 | -0.95 | -0.59 | -0.57 | 0.70  | 0.41  | -0.42 | 0.35  | -2.11 | 0.70 |
| ADAMTS15    | 17065  | NM_022496    | 7777 | 0.76  | 0.40  | 0.11  | 0.17  | 0.16  | 0.16  | 0.79  | 0.04  | 0.11  | 1.04  | 0.29  | 0.70 |
| POU3F2      | 5454   | NM_005604    | 7778 | 0.53  | 0.19  | 0.21  | -0.37 | -0.24 | 0.02  | 0.45  | 0.15  | 0.10  | 0.94  | -0.59 | 0.70 |
| MTHFD1      | 4532   | NM_005956    | 7779 | 1.35  | -0.07 | 0.70  | -0.30 | -0.11 | 1.33  | 0.84  | 0.45  | -0.59 | 1.98  | 0.91  | 0.70 |
| SNRP        | 5988   | NM_022496    | 7780 | 1.27  | 0.52  | 0.72  | 0.68  | 1.00  | -0.68 | 0.22  | 0.17  | 0.32  | 2.71  | 2.83  | 0.70 |
| POK         | 51426  | NM_016218    | 7781 | 1.19  | 0.72  | -0.07 | -0.05 | 0.04  | -1.09 | 0.14  | 0.03  | 0.53  | 0.84  | -1.10 | 0.70 |
| PAIP2       | 51347  | NM_016480    | 7782 | -0.82 | -0.40 | -1.25 | -1.32 | -1.26 | -0.67 | 0.07  | 0.87  | -0.24 | -2.47 | -3.26 | 0.70 |
| SUZ420H1    | 51311  | NM_016208    | 7783 | 0.12  | 0.61  | 0.62  | 0.19  | -0.11 | 0.02  | -0.25 | 0.74  | 0.21  | 1.35  | 0.10  | 0.70 |
| COPX1       | 26958  | NM_021133    | 7784 | -0.29 | 0.50  | -0.44 | -0.08 | -0.79 | -0.27 | 0.24  | 1.12  | 0.18  | 0.23  | -1.54 | 0.70 |
| SLOC16A5    | 9121   | NM_004695    | 7785 | -1.02 | -0.94 | -1.18 | -1.24 | -0.69 | -0.95 | 0.44  | 0.65  | -0.39 | -3.14 | -2.88 | 0.70 |
| SGIR8       | 59307  | NM_021805    | 7786 | 0.57  | 0.15  | 0.25  | -0.09 | -0.41 | 0.38  | 0.62  | 0.10  | -0.02 | 0.96  | -0.13 | 0.70 |
| ZNFS3A      | 6940   | NM_005649    | 7787 | 0.21  | -0.03 | 0.03  | -0.16 | 0.00  | -0.41 | 0.21  | 0.21  | 0.27  | 0.31  | 0.57  | 0.70 |
| SKP1A       | 6500   | NM_170679    | 7788 | 0.02  | 0.39  | -0.55 | -0.65 | -0.45 | 0.50  | 0.64  | 0.20  | -0.14 | -0.14 | -0.60 | 0.70 |
| UNC5792     | 387836 | NM_001130711 | 7789 | 0.41  | 0.61  | -0.23 | -0.13 | -0.62 | -0.50 | 0.19  | 0.67  | -0.16 | 0.79  | -1.25 | 0.70 |
| CLC1        | 51267  | NM_016511    | 7790 | 2.10  | 0.39  | 1.31  | 0.45  | -0.01 | 0.86  | 0.71  | -0.04 | 0.03  | 3.79  | 1.30  | 0.70 |
| SLOC24A1    | 93487  | NM_004727    | 7791 | 0.05  | 0.98  | 0.15  | -0.33 | 0.88  | 0.38  | 0.54  | 0.13  | 0.03  | 1.18  | 0.93  | 0.70 |
| PITPNM2     | 57605  | NM_020845    | 7792 | -0.53 | 0.16  | 0.36  | -1.40 | -0.97 | -0.82 | -0.09 | 0.45  | 0.34  | -0.02 | -3.19 | 0.70 |
| NDJAF4      | 4701   | NM_005001    | 7793 | 2.33  | 2.08  | 3.23  | 1.38  | 3.07  | 2.69  | 0.60  | -0.02 | 0.11  | 7.64  | 7.15  | 0.70 |
| UNC13C      | 440279 | NM_001005034 | 7794 | -0.67 | -0.28 | 0.01  | -1.25 | -1.15 | -0.76 | -0.08 | 0.45  | 0.32  | -0.94 | -3.16 | 0.69 |
| HSPA2       | 3306   | NM_021979    | 7795 | -0.26 | 0.76  | -0.15 | -0.17 | 0.14  | 0.10  | -0.07 | 0.99  | -0.23 | 0.36  | 0.07  | 0.69 |
| CD2AP       | 23607  | NM_012120    | 7796 | -1.14 | -0.76 | -0.68 | 0.62  | 0.31  | -0.35 | 0.34  | -0.66 | 1.01  | -0.22 | 0.58  | 0.69 |
| ASPM75      | 55326  | NM_021861    | 7797 | 1.24  | 0.34  | 1.41  | 0.19  | 0.12  | 0.11  | 0.59  | 0.12  | 0.11  | 1.99  | 0.86  | 0.69 |
| DNAC12      | 56521  | NM_201262    | 7798 | 6.10  | 3.14  | 2.87  | 6.31  | 3.82  | 4.11  | 0.87  | 0.13  | -0.31 | 12.11 | 14.24 | 0.69 |
| MTF         | 94033  | NM_177478    | 7799 | -0.37 | 0.06  | -0.74 | -0.30 | -0.60 | -1.29 | 0.38  | 0.49  | -0.18 | -1.05 | -2.19 | 0.69 |
| FNRL2       | 11449  | NM_001005205 | 7800 | 0.36  | -0.75 | -0.44 | -0.15 | 0.27  | 0.45  | 1.12  | 0.27  | 0.60  | 0.06  | 0.80  | 0.69 |
| KCNCA       | 3749   | NM_153763    | 7801 | -0.37 | 0.70  | -0.73 | -1.06 | -1.22 | -0.82 | 0.03  | -0.12 | 0.79  | -1.20 | -3.10 | 0.69 |
| PITPN1      | 26207  | NM_012417    | 7802 | 0.21  | -0.01 | -0.26 | -0.48 | -0.34 | -0.28 | 0.48  | 0.44  | -0.22 | -0.07 | -1.10 | 0.69 |
| USP30       | 84749  | NM_012663    | 7803 | 1.53  | 0.00  | 0.18  | 0.23  | -0.82 | -0.27 | 0.62  | 0.14  | -0.07 | 1.71  | -0.86 | 0.69 |
| TBRRC       | 84617  | NM_021825    | 7804 | 1.02  | 1.32  | 0.63  | 0.32  | 0.54  | 0.68  | 0.00  | 0.00  | 0.00  | 1.97  | 1.17  | 0.69 |
| DKFZP470I48 | 127254 | NM_001002912 | 7805 | 0.87  | 0.46  | -0.35 | 0.20  | 0.10  | -0.27 | 0.86  | -0.06 | -0.11 | 0.98  | 0.02  | 0.69 |
| MHRP24      | 79590  | NM_024540    | 7806 | -0.73 | -0.24 | -0.49 | -1.22 | -0.30 | -0.68 | -0.25 | 0.09  | 0.85  | -1.46 | -2.19 | 0.69 |
| TRP4        | 2878   | NM_020285    | 7807 | 0.24  | 0.90  | 0.89  | 0.18  | -0.22 | 0.01  | 0.18  | -0.22 | 0.17  | 1.98  | 1.17  | 0.69 |
| AUTS2       | 26053  | NM_015570    | 7808 | 0.00  | 0.37  | -0.22 | -0.92 | -0.42 | -0.44 | 0.91  | -0.12 | -0.10 | -0.59 | -1.78 | 0.69 |
| IL17B8      | 55540  | NM_018725    | 7809 | -0.21 | 0.49  | 1.45  | 1.35  | 0.59  | 0.64  | -0.61 | 0.08  | 1.22  | 1.73  | 2.59  | 0.69 |
| TRIP        | 10527  | NM_001005091 | 7810 | 0.53  | 0.85  | 0.73  | 0.23  | -0.42 | 0.39  | 0.43  | -0.09 | 0.13  | 2.10  | 1.04  | 0.69 |
| UNG2        | 10309  | NM_021147    | 7811 | 1.25  | 0.59  | -1.53 | 0.05  | 0.24  | -0.26 | 1.23  | 0.32  | -0.86 | 0.31  | 0.03  | 0.69 |
| GD2         | 2658   | NM_016204    | 7812 | 0.48  | 0.89  | 0.70  | 0.77  | -0.36 | -0.15 | -0.37 | 0.67  | 0.38  | 2.08  | 0.25  | 0.69 |
| FLJ0460     | 55342  | NM_018997    | 7813 | -0.53 | 0.17  | 0.23  | 0.42  | 0.00  | -0.34 | 0.00  | 0.40  | 0.29  | 0.92  | 0.07  | 0.69 |
| HBL         | 3268   | NM_006076    | 7814 | 0.10  | 0.41  | 0.79  | 0.02  | -0.73 | 0.20  | -0.17 | 0.73  | 0.10  | 2.10  | 0.69  | 0.69 |
| MUC18       | 53841  | NM_013264    | 7815 | 0.30  | 0.89  | 0.14  | -0.22 | -0.20 | 0.80  | 0.00  | 1.05  | 0.37  | 0.73  | 0.37  | 0.68 |
| KMA1036     | 22846  | NM_014909    | 7816 | 0.65  | -0.01 | -0.62 | -0.23 | 0.04  | -0.02 | 1.33  | -0.04 | -0.60 | 0.02  | -0.21 | 0.68 |
| HTF18       | 27454  | NM_170578    | 7817 | 0.80  | 0.54  | 0.73  | 0.80  | 0.54  | 0.73  | 0.80  | 0.54  | 0.73  | 0.80  | 0.54  | 0.68 |
| ORS24       | 390053 | NM_001005222 | 7818 | 0.64  | 2.26  | 1.53  | 1.52  | 1.54  | 1.29  | -0.39 | 0.97  | 0.10  | 4.44  | 4.36  | 0.68 |
| TAFAS       | 25817  | NM_015381    | 7819 | 1.86  | 0.43  | 1.36  | 0.63  | 0.23  | 1.26  | 0.97  | -0.11 | -0.18 | 3.64  | 2.12  | 0.68 |
| TRAP        | 79669  | NM_021816    | 7820 | -0.29 | -0.61 | -0.59 | -0.19 | -0.69 | -0.19 | 0.27  | -0.69 | -0.19 | -0.67 | -1.23 | 0.68 |
| FLJ0547     | 55721  | NM_018134    | 7821 | 1.09  | 0.61  | -0.56 | 0.69  | 0.75  | -0.02 | 0.62  | 0.46  | -0.40 | 1.14  | 1.42  | 0.68 |
| LPN3        | 64900  | NM_022896    | 7822 | -0.21 | 0.17  | 0.09  | -0.19 | -0.31 | -0.62 | -0.26 | 0.47  | 0.48  | 0.05  | -1.12 | 0.68 |
| KDINS220    | 57498  | NM_020738    | 7823 | -0.66 | -0.31 | -0.39 | -1.11 | -1.06 | -1.00 | 0.10  | 0.27  | 0.31  | -3.17 | -3.16 | 0.68 |
| NOV3        | 10451  | NM_006113    | 7824 | 0.24  | 0.11  | 0.00  | 0.07  | 0.14  | 0.16  | -0.19 | 0.62  | 0.10  | 0.09  | 0.70  | 0.68 |
| NVT         | 4931   | NM_206840    | 7825 | -0.68 | -0.40 | -0.12 | 0.23  | 0.31  | -0.61 | -0.61 | 0.32  | 0.97  | -1.19 | -0.07 | 0.68 |
| NOF4        | 4850   | NM_001008225 | 7826 | 0.50  | 0.15  | 0.48  | -0.40 | 0.21  | -0.21 | 0.45  | 0.14  | 0.37  | 1.13  | -0.39 | 0.68 |
| RPS21L_1    | 9027   | NM_001005222 | 7827 | 0.09  | 0.12  | 0.24  | 0.17  | -0.24 | 0.36  | 0.27  | -0.04 | 0.55  | 0.45  | 0.55  | 0.68 |
| NAGK        | 55577  | NM_017567    | 7828 | -0.14 | 0.23  | -0.16 | -0.20 | -0.29 | -0.49 | 0.05  | 0.60  | 0.03  | -0.07 | 0.97  | 0.68 |
| HEX1        | 8820   | NM_003865    | 7829 | 1.91  | 1.64  | 0.56  | 0.29  | 0.30  | 0.20  | 0.46  | 0.42  | -0.20 | 4.11  | 0.79  | 0.68 |
| TRH28       | 28697  | NM_001037304 | 7830 | 1.23  | 0.00  | 0.00  | 0.17  | -0.17 | 0.07  | 0.64  | -0.09 | 0.13  | 2.16  | 1.03  | 0.68 |
| GARNL4      | 23108  | NM_015085    | 7831 | -0.15 | -0.38 | -0.73 | -0.08 | -0.89 | -0.83 | -0.02 | 0.20  | 0.50  | -1.81 | -1.81 | 0.68 |
| ADIPOR2     | 79602  | NM_024551    | 7832 | 0.23  | -0.14 | 0.07  | -0.05 | 0.78  | 0.23  | 0.52  | -0.12 | 0.62  | 0.15  | 0.97  | 0.68 |
| EDLW1       | 9695   | NM_016474    | 7833 | -0.11 | 0.12  | -0.35 | -0.61 | -0.41 | -0.51 | 0.50  | 0.22  | -0.05 | -0.33 | -1.53 | 0.68 |
| MOGDR       | 5586   | NM_004963    | 7834 | 0.64  | 0.85  | 0.13  | 0.26  | 0.85  | 0.77  | 0.16  | 0.21  | 0.27  | 1.37  | 1.37  | 0.68 |
| LRG3        | 121227 | NM_153377    | 7835 | -0.30 | -0.15 | -0.16 | -1.03 | -0.23 | -0.46 | 0.23  | -0.31 | 0.76  | -0.61 | -1.73 | 0.68 |
| PHEX        | 5251   | NM_000444    | 7836 | 1.56  | 0.26  | 0.33  | 0.98  | 0.29  | -0.29 | 0.25  | -0.13 | 0.56  | 2.15  | 0.97  | 0.68 |
| DCP2        | 54550  | NM_015085    | 7837 | 1.88  | 1.37  | 1.60  | 1.18  | 1.17  | 1.60  | 1.18  | 1.17  | 1.60  | 3.85  | 1.25  | 0.68 |
| FLJ0116     | 55686  | NM_018000    | 7838 | 0.80  | -0.11 | 0.89  | -0.21 | 0.11  | 0.82  | 0.72  | -0.11 | 0.07  | 1.58  | 0.73  | 0.68 |
| PLCD4       | 84812  | NM_032726    | 7839 | -1.25 | -0.92 | -1.02 | -1.65 | -1.75 | -1.07 | 0.48  | 0.78  | -0.58 | -3.19 | -4.46 | 0.68 |
| IRFMT1      | 64164  | NM_001037358 | 7840 | -0.03 | 2.58  | 0.06  | 0.40  | 0.17  | 0.30  | 0.60  | 0.10  | 1.17  | 2.60  | 0.50  | 0.68 |
| SO2         | 6655   | NM_006939    | 7841 | 0.22  | 0.71  | 0.91  | 0.39  | 0.57  | 0.59  | 0.73  | -0.06 | 0.01  | 1.64  | 1.55  | 0.68 |
| RBPMS2      | 348993 | NM_194272    | 7842 | 0.36  | 0.17  | -0.47 | 0.10  | -0.40 | -1.01 | 0.58  | 0.02  | 0.08  | -0.27 | -1.31 | 0.67 |
| LPN4        | 22859  | NM_014921    | 7843 | 2.38  | 1.21  | 0.89  | 0.68  | 0.69  | 0.79  | 0.65  | -0.05 | 0.08  | 4.48  | 2.09  | 0.67 |
| FLJ17183    | 21939  | NM_001039111 | 7844 | 0.40  | 0.00  | 0.00  | 0.17  | 0.24  | 0.04  | 0.64  | 0.16  | 0.64  | 0.64  | 0.35  | 0.67 |
| ZNF471      | 57373  | NM_020813    | 7845 | 1.44  | -0.09 | 0.78  | 0.53  | -0.19 | -0.22 | 0.32  | 0.32  | 0.68  | 2.13  | 0.12  | 0.67 |
| DCGR        | 54487  | NM_022720    | 7846 | -0.01 | -0.02 | -0.07 | -0.32 | -1.05 | -0.66 | -0.06 | 0.52  | 0.21  | -0.09 | -2.03 | 0.67 |
| FTL2        | 6524   | NM_000756    | 7847 | 1.48  | 0.69  | 0.69  | 1.71  | 1.57  | 1.09  | 0.84  | 0.59  | 0.72  | 1.24  | 1.42  | 0.67 |
| FCGR3A      | 2214   | NM_000569    | 7848 | -0.76 | -0.24 | -0.84 | -1.64 | -1.09 | -0.50 | 0.13  | 0.88  | -0.34 | -1.85 | -3.22 | 0.67 |
| CR1F3       | 51379  | NM_015986</  |      |       |       |       |       |       |       |       |       |       |       |       |      |

|             |        |              |      |       |       |       |       |       |       |       |       |       |       |       |      |
|-------------|--------|--------------|------|-------|-------|-------|-------|-------|-------|-------|-------|-------|-------|-------|------|
| SEPH42      | 253190 | NM_0145009   | 7931 | 0.83  | 0.92  | 1.35  | 0.60  | 0.65  | 0.44  | -0.02 | 0.44  | 0.22  | 3.10  | 1.68  | 0.63 |
| CDORF24     | 5599   | NM_0145009   | 7932 | -0.26 | -0.24 | 0.14  | -0.01 | -0.35 | -0.43 | 0.11  | 0.27  | 0.26  | -0.83 | -1.18 | 0.63 |
| CD04        | 594    | NM_013220    | 7933 | 1.44  | 0.84  | -0.16 | 0.32  | -0.54 | 0.25  | 0.71  | 0.47  | -0.54 | 2.12  | 0.03  | 0.63 |
| FFPR21      | 5803   | NM_002851    | 7934 | -0.30 | 0.53  | -0.02 | 0.22  | 0.00  | -0.40 | -0.23 | 0.68  | 0.19  | 0.21  | -0.19 | 0.63 |
| COLLEC12    | 81035  | NM_130386    | 7935 | -0.69 | 0.42  | -0.78 | -1.11 | -1.31 | -0.74 | -0.51 | 1.47  | -0.32 | -1.04 | -1.16 | 0.63 |
| BAB18       | 903    | NM_000808    | 7936 | 0.04  | 0.21  | 0.21  | 0.62  | -0.02 | 0.05  | 0.07  | 0.05  | 0.21  | 2.50  | 2.35  | 0.63 |
| OR51F2      | 119694 | NM_001004753 | 7937 | 0.30  | 0.47  | -0.33 | -0.01 | -0.53 | -0.37 | -0.18 | 1.00  | -0.18 | 0.44  | -0.90 | 0.63 |
| DMNT17      | 29947  | NM_175867    | 7938 | -0.39 | -0.62 | -0.04 | -1.18 | -0.62 | -0.64 | -0.44 | -0.36 | 0.55  | -1.05 | -2.44 | 0.63 |
| CCCL1       | 2082   | NM_010933    | 7939 | 4.96  | 3.30  | 0.78  | 3.00  | 3.00  | 3.00  | 3.00  | 3.00  | 3.00  | 20.04 | 21.18 | 0.63 |
| CDEA        | 1149   | NM_001279    | 7940 | 0.59  | 0.35  | 0.16  | -0.27 | -0.03 | 0.00  | 0.31  | -0.19 | 0.50  | 0.40  | -0.30 | 0.63 |
| KR1065      | 112802 | NM_033448    | 7941 | 0.72  | -0.28 | -1.04 | -0.42 | 0.02  | -0.48 | 0.37  | 0.80  | -0.55 | -2.04 | -0.89 | 0.63 |
| GR120       | 6380   | NM_000536    | 7942 | -0.31 | -0.07 | -0.36 | -0.41 | -0.41 | -0.36 | -0.59 | -0.12 | 0.27  | -1.34 | -0.49 | 0.63 |
| ZNF571      | 51276  | NM_016536    | 7943 | 1.24  | 0.93  | 0.02  | 0.48  | 0.08  | -0.19 | 0.42  | 0.22  | -0.01 | 2.19  | 0.38  | 0.63 |
| TAS2849     | 259295 | NM_176889    | 7944 | 0.59  | 0.27  | -0.02 | -0.30 | 0.33  | -0.25 | 0.17  | 0.07  | 0.39  | 0.85  | -0.22 | 0.63 |
| PK3C28      | 5287   | NM_002646    | 7945 | -0.65 | -0.07 | -0.46 | -0.70 | -0.75 | -0.24 | 0.37  | 0.48  | -0.23 | -1.18 | -1.21 | 0.63 |
| FDN1        | 6452   | NM_001001132 | 7946 | 0.27  | 0.40  | 0.34  | 0.48  | -0.07 | -0.23 | 0.34  | 0.14  | 0.14  | 1.01  | -0.27 | 0.63 |
| MRF33       | 51650  | NM_053035    | 7947 | 1.23  | -0.09 | -0.08 | -0.32 | -0.26 | -0.66 | 1.09  | -0.12 | -0.35 | 1.06  | 0.10  | 0.62 |
| Korf39      | 139231 | NM_207318    | 7948 | -0.13 | 1.08  | 0.11  | -0.35 | 0.73  | 0.29  | -0.28 | 0.38  | 0.51  | 1.06  | 0.67  | 0.62 |
| APW42       | 140025 | NM_080421    | 7949 | -0.22 | -0.49 | 0.04  | -0.52 | -0.84 | -0.70 | 0.20  | -0.11 | 0.53  | -0.77 | 2.06  | 0.62 |
| ZNF493      | 284443 | NM_175910    | 7950 | 0.25  | 0.42  | 0.77  | -0.25 | -0.48 | 0.32  | 0.19  | 0.37  | 0.06  | 1.45  | -0.41 | 0.62 |
| OR6G1       | 390174 | NM_001002513 | 7951 | 0.36  | -0.22 | -0.69 | -0.90 | -0.70 | -0.68 | 0.92  | -0.07 | -0.23 | -0.54 | -2.27 | 0.62 |
| MPN2        | 339501 | NM_183062    | 7952 | 0.40  | -0.19 | -0.52 | 0.17  | 0.20  | 0.35  | 0.15  | 0.55  | -0.08 | -0.38 | -0.72 | 0.62 |
| EN1         | 2919   | NM_001426    | 7953 | 0.65  | -0.42 | 0.59  | -0.02 | -0.22 | 0.39  | -0.29 | 0.27  | 0.64  | 0.48  | 0.14  | 0.62 |
| OR51A7      | 119687 | NM_001004749 | 7954 | 0.31  | 0.10  | 0.00  | -0.13 | -0.46 | -0.57 | 0.49  | -0.04 | 0.18  | 0.41  | -1.17 | 0.62 |
| CMV45       | 202333 | NM_154310    | 7955 | -1.12 | 2.08  | 0.16  | 0.82  | 0.76  | 0.70  | 0.15  | 0.98  | -0.51 | 3.36  | 2.28  | 0.62 |
| CDORF185    | 39370  | NM_182658    | 7956 | 1.46  | 1.36  | 1.47  | 0.83  | 0.56  | 0.41  | 0.04  | 0.28  | 0.29  | 4.29  | 1.87  | 0.62 |
| GAD10       | 56934  | NM_020178    | 7957 | -0.18 | 0.20  | 0.33  | -0.25 | -0.18 | -0.53 | 0.05  | 0.19  | 0.38  | 0.34  | -0.96 | 0.62 |
| CENTD1      | 116984 | NM_139182    | 7958 | 1.68  | 0.31  | 2.35  | 0.70  | 0.43  | 1.03  | 0.34  | -0.31 | 0.59  | 4.34  | 2.15  | 0.62 |
| MGC12458    | 8438   | NM_000128    | 7959 | 0.24  | 0.98  | 0.67  | 0.59  | 0.62  | 0.67  | 0.59  | 0.62  | 0.67  | 1.00  | 0.38  | 0.62 |
| SLC28A2     | 9153   | NM_004212    | 7960 | 0.20  | -0.46 | 0.81  | 0.02  | -0.59 | -0.27 | -0.06 | -0.35 | 1.02  | 0.55  | -0.84 | 0.62 |
| FOPX2       | 93986  | NM_014491    | 7961 | 1.18  | 1.95  | 0.35  | 1.23  | 1.23  | 2.41  | 0.15  | 0.94  | -0.48 | 2.47  | 4.86  | 0.62 |
| NRRL        | 25836  | NM_001384    | 7962 | 0.34  | -0.33 | 0.14  | -0.02 | 0.33  | -0.14 | -0.02 | 0.33  | -0.14 | 0.15  | 0.21  | 0.62 |
| ACTA1       | 58     | NM_001100    | 7963 | 0.36  | 0.52  | -0.43 | -0.40 | 0.00  | -0.54 | 0.28  | 0.34  | -0.01 | 0.45  | 0.94  | 0.62 |
| OR6P1       | 199786 | NM_001098524 | 7964 | -0.56 | -0.84 | -0.64 | -1.73 | -1.54 | -0.55 | 0.99  | -0.44 | 0.06  | -2.05 | -3.83 | 0.61 |
| BC1E1       | 8387   | NM_003553    | 7965 | 0.91  | 0.82  | 0.40  | 1.12  | 0.58  | -0.14 | 0.01  | 0.35  | 0.25  | 2.13  | 1.56  | 0.61 |
| TNMD        | 64402  | NM_001444    | 7966 | 0.06  | 1.24  | 0.03  | 0.00  | 0.00  | 0.00  | 0.00  | 0.00  | 0.00  | 1.26  | 0.14  | 0.61 |
| MYOG        | 4646   | NM_004999    | 7967 | -0.27 | 0.24  | -1.11 | -0.19 | 0.16  | -0.29 | 0.19  | 0.91  | -0.49 | -1.14 | -0.32 | 0.61 |
| TSNAX       | 7257   | NM_005999    | 7968 | -0.07 | 0.73  | 0.83  | 0.75  | 0.37  | 0.84  | -0.27 | 0.41  | 0.46  | 1.49  | 1.95  | 0.61 |
| CHN1        | 1264   | NM_001299    | 7969 | 1.00  | 1.15  | 0.56  | 0.47  | 1.12  | 0.56  | 0.47  | 1.12  | 0.56  | 0.71  | 3.71  | 0.61 |
| TNMF51      | 4071   | NM_014220    | 7970 | 0.59  | 0.20  | 0.15  | 0.27  | 0.68  | 0.06  | 0.33  | -0.03 | 0.32  | 0.94  | 1.01  | 0.61 |
| MAP3BP7     | 23118  | NM_015093    | 7971 | -0.70 | 0.22  | 1.37  | 0.73  | 0.24  | -0.51 | -0.58 | -0.09 | 1.28  | 0.90  | 0.46  | 0.61 |
| RAE11-FFP2  | 2284   | NM_000000    | 7972 | 0.80  | 0.28  | -0.09 | 0.00  | -0.09 | -0.08 | 0.00  | -0.08 | 0.00  | 0.85  | 0.85  | 0.61 |
| REG4        | 83998  | NM_032004    | 7973 | 0.85  | 0.97  | -0.30 | -0.66 | -0.35 | -0.31 | -0.24 | -0.37 | 1.22  | -2.12 | -1.32 | 0.61 |
| MB          | 4151   | NM_005368    | 7974 | 0.71  | 0.23  | 0.09  | 0.37  | 1.35  | 0.88  | 1.05  | -0.10 | -0.34 | 1.03  | 2.59  | 0.61 |
| CYP2D6      | 57404  | NM_020674    | 7975 | 1.02  | 0.75  | 1.48  | 1.47  | 1.14  | 2.32  | 0.88  | -0.19 | -0.08 | 3.24  | 5.14  | 0.61 |
| CDORF779517 | 37489  | NM_00101732  | 7976 | 1.36  | 1.30  | 0.80  | 0.76  | 0.30  | 0.76  | 0.30  | 0.76  | 0.30  | 3.74  | 1.17  | 0.61 |
| HPSE2       | 60495  | NM_021828    | 7977 | -0.48 | 0.15  | -0.17 | -0.53 | -1.03 | -0.52 | -0.32 | 0.94  | -0.02 | -0.50 | -2.08 | 0.61 |
| SMYD2       | 56950  | NM_020197    | 7978 | -1.11 | 0.25  | 0.42  | -0.27 | 0.33  | -0.36 | 0.89  | -0.16 | -0.12 | 1.78  | -0.30 | 0.61 |
| SRP15       | 5110   | NM_010594    | 7979 | 0.27  | 0.15  | 0.59  | 0.12  | 0.15  | 0.19  | 0.12  | 0.15  | 0.19  | 0.15  | 0.30  | 0.61 |
| MGC39325    | 90362  | NM_147189    | 7980 | -0.74 | 0.24  | 0.65  | -0.16 | 0.67  | 0.03  | -0.43 | -0.34 | 1.38  | -0.44 | 0.54  | 0.61 |
| SH2D4B      | 387694 | NM_207372    | 7981 | -0.08 | 0.00  | 0.58  | 0.02  | 0.02  | -0.03 | -0.19 | -0.05 | 0.84  | 0.50  | 0.01  | 0.61 |
| NR1B1       | 7349   | NM_000852    | 7982 | 0.08  | 0.00  | 0.65  | 0.00  | 0.08  | 0.08  | 0.08  | 0.08  | 0.08  | 0.04  | 0.68  | 0.61 |
| SRPR        | 6734   | NM_003139    | 7983 | 0.32  | -0.34 | 1.37  | 1.05  | 0.26  | -0.02 | -0.48 | -0.25 | 1.34  | 1.35  | 1.29  | 0.61 |
| MGC39350    | 159013 | NM_144970    | 7984 | 0.24  | 0.30  | 0.26  | -0.01 | 0.39  | -0.16 | 0.38  | -0.39 | 0.61  | 0.81  | 0.23  | 0.61 |
| PKAME       | 23532  | NM_206954    | 7985 | 0.73  | 0.26  | -1.15 | -0.67 | 0.83  | 0.94  | 1.81  | -0.22 | -0.99 | -0.16 | -0.51 | 0.61 |
| TRAF6       | 1138   | NM_007253    | 7986 | -0.27 | 0.07  | 0.42  | -0.41 | -1.11 | 0.02  | -0.42 | 0.86  | 0.15  | 0.32  | 0.40  | 0.61 |
| TGFR4       | 70488  | NM_003242    | 7987 | -0.07 | 0.60  | 0.81  | 0.57  | 0.30  | 0.71  | -0.03 | 0.54  | 0.09  | 1.56  | 1.58  | 0.60 |
| UNC94A      | 23183  | NM_025154    | 7988 | -0.30 | 1.18  | 0.52  | 0.78  | 1.03  | 0.07  | -0.49 | 0.18  | 0.91  | 1.41  | 1.75  | 0.60 |
| NSHG        | 2936   | NM_000079    | 7989 | 0.25  | 0.64  | 0.23  | 0.14  | 0.53  | 0.44  | 0.13  | 0.44  | 0.13  | 1.76  | 1.21  | 0.60 |
| PM1H1       | 57460  | NM_350880    | 7990 | 1.00  | 0.65  | 0.19  | -0.12 | 0.05  | 0.28  | 0.17  | 0.26  | 0.17  | 1.84  | 0.22  | 0.60 |
| PCDH12      | 56137  | NM_031864    | 7991 | 0.67  | 0.84  | -0.04 | -0.15 | 0.02  | 0.29  | 0.43  | 0.41  | -0.23 | 1.47  | 0.13  | 0.60 |
| CDORF20     | 28039  | NM_171844    | 7992 | 2.27  | 1.44  | 0.48  | 1.80  | 1.80  | 1.80  | 1.80  | 1.80  | 1.80  | 1.52  | 3.22  | 0.60 |
| RDS         | 5961   | NM_000322    | 7993 | -1.03 | -0.07 | 0.09  | 0.17  | -0.03 | -0.59 | -0.30 | 0.46  | 0.44  | -0.01 | -0.44 | 0.60 |
| CCNB3       | 85417  | NM_033670    | 7994 | 1.00  | 0.42  | 0.90  | 0.00  | 0.44  | 0.12  | 0.34  | -0.24 | 0.50  | 2.32  | 0.56  | 0.60 |
| ZFDR        | 8526   | NM_003508    | 7995 | 2.10  | 1.36  | -0.43 | 0.53  | 0.46  | 1.38  | 1.49  | -0.21 | -0.68 | 2.73  | 2.17  | 0.60 |
| DEAF105     | 245080 | NM_152029    | 7996 | 1.33  | 0.47  | 0.15  | 0.26  | 0.47  | 0.24  | 0.26  | 0.47  | 0.24  | 3.05  | 1.01  | 0.60 |
| C19ORF21    | 126353 | NM_173481    | 7997 | 0.09  | 0.21  | 0.36  | -0.15 | -0.53 | -0.11 | -0.07 | 0.29  | 0.38  | 0.65  | -0.79 | 0.60 |
| ZNF550      | 162972 | NM_001039654 | 7998 | 0.20  | 0.86  | 0.59  | 0.51  | -0.04 | -0.03 | 0.00  | 0.60  | 0.00  | 1.65  | 0.45  | 0.60 |
| AR4         | 1092   | NM_000713    | 7999 | 0.26  | 0.05  | 0.66  | 0.05  | 0.22  | 0.05  | 0.22  | 0.05  | 0.22  | 0.66  | 1.09  | 0.60 |
| ARD1        | 8260   | NM_003491    | 8000 | -0.40 | 0.06  | -0.46 | -0.52 | -0.18 | -0.11 | 0.05  | 0.75  | -0.20 | -0.80 | -0.81 | 0.60 |
| CNN151      | 1446   | NM_001025104 | 8001 | 0.40  | -0.30 | 0.37  | -0.67 | -0.06 | -0.75 | 0.30  | -0.60 | 0.90  | 0.12  | -1.49 | 0.60 |
| LOC10191888 | 42565  | NM_00101888  | 8002 | -0.91 | -1.12 | -0.48 | -0.00 | -1.12 | -0.48 | -0.00 | -1.12 | -0.48 | -2.51 | -1.74 | 0.60 |
| LIMK        | 7371   | NM_012474    | 8003 | 0.30  | 0.50  | -0.35 | 0.00  | 0.00  | 0.00  | 0.73  | -0.11 | 0.02  | 0.09  | 0.59  | 0.60 |
| TAI15       | 8148   | NM_139215    | 8004 | -0.06 | 1.60  | 1.67  | 2.50  | 2.20  | 1.13  | 0.13  | -0.53 | -0.08 | 3.21  | 5.82  | 0.59 |
| SIF         | 55256  | NM_000498    | 8005 | -0.71 | -0.68 | -0.93 | -1.42 | -1.01 | -1.27 | 0.41  | 0.33  | -0.14 | -2.31 | -1.70 | 0.59 |
| OR5D18      | 21943  | NM_00019552  | 8006 | -0.06 | 0.47  | 0.29  | 0.20  | 0.94  | -0.02 | 0.45  | 0.45  | 0.96  | 1.56  | 1.59  | 0.59 |
| SUP10H      | 6830   | NM_003170    | 8007 | -0.68 | -0.76 | -1.22 | -0.42 | -0.27 | -0.50 | 0.48  | 0.57  | -0.46 | -2.66 | -1.19 | 0.59 |
| TN42        | 50618  | NM_147152    | 8008 | 1.27  | 0.71  | 1.02  | 2.49  | 1.42  | 2.88  | 0.86  | 0.02  | -0.29 | 3.00  | 6.18  | 0.59 |
| SLC9A10     | 28525  | NM_032961    | 8009 | 0.43  | 0.30  | 0.77  | 1.23  | 1.45  | 0.30  | 0.77  | 1.23  | 1.45  | 1.50  | 2.26  | 0.59 |
| KIAA1546    | 162515 | NM_177454    | 8010 | -0.02 | 0.12  | -0.06 | -0.76 | -0.74 | 0.03  | 0.10  | 0.59  | -0.10 | 0.03  | -1.47 | 0.59 |
| FLK20487    | 54949  | N            |      |       |       |       |       |       |       |       |       |       |       |       |      |

|            |        |              |      |       |       |       |       |       |       |       |       |       |       |       |      |
|------------|--------|--------------|------|-------|-------|-------|-------|-------|-------|-------|-------|-------|-------|-------|------|
| MPZ        | 4359   | NM_000530    | 8093 | 0.64  | -0.08 | 0.05  | -0.43 | -0.79 | -0.07 | 0.56  | 0.29  | -0.31 | 0.61  | -1.29 | 0.55 |
| THM47      | 8359   | NM_172240    | 8094 | 1.80  | 1.50  | 0.65  | 1.47  | 0.18  | 0.19  | 0.22  | 0.26  | 0.65  | 1.50  | 2.64  | 0.58 |
| C200R126   | 81572  | NM_030815    | 8095 | 0.02  | 0.05  | -0.63 | -0.71 | -0.43 | -0.46 | -0.01 | 0.74  | -0.18 | 0.44  | -1.60 | 0.55 |
| CSORF126   | 282025 | NM_173690    | 8096 | 0.16  | 0.33  | 0.74  | 0.47  | -0.31 | 1.44  | 0.01  | 0.52  | 0.02  | 1.24  | 1.60  | 0.55 |
| FLJ4287    | 388221 | NM_207381    | 8099 | -0.01 | 0.00  | -0.19 | -0.05 | -0.24 | -0.33 | 0.39  | -0.13 | 0.29  | -0.20 | -1.42 | 0.55 |
| CS09       | 86     | NM_000611    | 8100 | 0.66  | -0.09 | 0.42  | 0.01  | -0.09 | 0.45  | 0.11  | 0.09  | 0.15  | 0.15  | 0.23  | 0.55 |
| GALNT5     | 168391 | NM_145292    | 8099 | -0.07 | 0.52  | -0.11 | -0.07 | -0.21 | 0.31  | -0.15 | 0.79  | -0.10 | 0.33  | 0.03  | 0.55 |
| FLJ48922   | 91607  | NM_152270    | 8100 | 0.24  | 0.10  | -0.10 | 0.31  | -0.42 | 0.11  | -0.20 | 0.73  | 0.02  | -0.23 | 0.00  | 0.55 |
| RFP        | 373    | NM_021991    | 8101 | 0.34  | 1.83  | 0.54  | 0.11  | 0.55  | 1.03  | 0.55  | 1.03  | 0.19  | 0.30  | 0.52  | 0.55 |
| SGCN       | 10590  | NM_006998    | 8102 | 2.05  | 1.58  | 0.10  | 1.17  | 1.70  | 1.17  | 0.98  | 0.13  | -0.56 | 3.73  | 4.04  | 0.55 |
| SLC6A13    | 6540   | NM_016615    | 8103 | -1.54 | -2.44 | -2.29 | -2.58 | -3.58 | -2.67 | 1.75  | -0.50 | -0.70 | -6.28 | -8.83 | 0.55 |
| SHANK1     | 5084   | NM_004448    | 8104 | -0.46 | -0.64 | 0.23  | 0.31  | -0.10 | -0.19 | 0.21  | -0.10 | -0.10 | -1.34 | -1.11 | 0.55 |
| SLC35A1    | 10559  | NM_006416    | 8105 | 0.43  | 0.16  | -0.48 | -0.28 | -0.19 | -0.19 | 0.63  | 0.30  | -0.39 | 0.11  | 0.07  | 0.55 |
| MEST       | 4232   | NM_177525    | 8106 | -1.01 | -0.78 | -0.91 | -1.13 | -0.97 | -1.21 | 0.04  | 0.00  | 0.51  | -2.70 | -3.31 | 0.55 |
| EPN2       | 22905  | NM_148921    | 8107 | -0.67 | -0.17 | 0.00  | 0.34  | 0.09  | -0.39 | -0.67 | 0.14  | 1.08  | -0.84 | 0.04  | 0.55 |
| DSR124     | 245537 | NM_00107300  | 8108 | 1.87  | 0.45  | 1.43  | 1.30  | 1.02  | 0.72  | 0.44  | -0.31 | 0.41  | 2.85  | 3.04  | 0.55 |
| GRP37      | 2861   | NM_005302    | 8109 | 0.02  | -0.49 | -0.08 | -0.55 | -0.75 | -0.56 | 0.31  | 0.11  | 0.13  | -0.55 | -1.66 | 0.54 |
| HCC2       | 29915  | NM_013320    | 8110 | -0.40 | 0.77  | 0.64  | 0.99  | -0.35 | 0.35  | -0.57 | 0.75  | 0.36  | 1.01  | 0.99  | 0.54 |
| CSH190     | 387357 | NM_001018023 | 8111 | 0.52  | 0.22  | 0.21  | -0.13 | 0.01  | -0.13 | 0.11  | 0.20  | 0.13  | 0.96  | 0.24  | 0.54 |
| ZNF273     | 10793  | NM_021148    | 8112 | 0.49  | 0.47  | 0.04  | 0.48  | -0.18 | -0.09 | -0.07 | 0.50  | 0.11  | 1.00  | 0.22  | 0.54 |
| CC7B       | 10693  | NM_006584    | 8113 | 1.45  | 0.80  | 0.31  | 0.72  | 0.64  | -0.01 | 0.33  | -0.10 | 0.31  | 2.56  | 1.36  | 0.54 |
| ZCCHC10    | 54819  | NM_017665    | 8114 | 1.33  | 1.56  | 0.01  | 1.38  | 0.74  | 1.25  | 0.11  | 0.64  | -0.71 | 2.89  | 3.37  | 0.54 |
| MGC53261   | 139312 | NM_173494    | 8115 | -0.29 | 1.18  | 1.14  | 0.67  | -0.20 | -0.35 | -0.57 | 0.02  | 1.09  | 2.03  | 0.12  | 0.54 |
| HUMMLC28   | 29895  | NM_013292    | 8116 | 1.96  | 1.17  | 0.02  | 0.51  | 2.53  | 0.79  | 1.25  | 0.34  | -0.36 | 3.14  | 3.83  | 0.54 |
| FLJ25076   | 134131 | NM_194009    | 8117 | 0.96  | 0.40  | 0.85  | 0.20  | 0.51  | 0.04  | 0.25  | -0.11 | 0.41  | 2.21  | 0.74  | 0.54 |
| C200R112   | 140038 | NM_080616    | 8118 | 1.05  | 0.77  | 0.60  | 0.42  | 0.48  | 0.91  | 0.31  | 0.40  | 0.17  | 2.42  | 1.83  | 0.54 |
| IRF2N2     | 57407  | NM_020737    | 8119 | 1.10  | 0.09  | 1.13  | 0.11  | 0.28  | 2.15  | 1.26  | -0.27 | -0.45 | 2.32  | 2.54  | 0.54 |
| ANPEF      | 290    | NM_001150    | 8120 | 0.96  | -0.02 | -0.22 | -0.84 | -0.43 | -0.36 | 0.90  | -0.14 | -0.22 | 0.72  | -1.63 | 0.54 |
| HAVCR2     | 8486   | NM_007782    | 8121 | 0.99  | 1.83  | 0.29  | 1.68  | 0.29  | 0.60  | 0.46  | 0.29  | 0.60  | 0.84  | 2.06  | 0.54 |
| CL10RF23   | 55291  | NM_018312    | 8122 | 0.96  | 0.91  | 1.09  | 0.50  | 1.67  | 0.25  | 0.09  | -0.10 | 0.55  | 2.96  | 2.41  | 0.54 |
| CHT1       | 11118  | NM_003465    | 8123 | -0.98 | -0.90 | -0.85 | -0.76 | -1.11 | 0.30  | 0.40  | 0.37  | -0.24 | -2.74 | -1.58 | 0.54 |
| NRUGN      | 51135  | NM_0033888   | 8124 | -0.99 | 0.41  | 0.54  | 0.24  | -0.89 | 0.61  | 0.03  | -0.40 | -0.22 | -0.04 | 0.27  | 0.54 |
| GAF1       | 26056  | NM_015470    | 8125 | 1.33  | 1.35  | 0.96  | 0.85  | -0.31 | 1.70  | 0.05  | 1.36  | -0.67 | 4.63  | 2.24  | 0.54 |
| MOG        | 4340   | NM_001008229 | 8126 | 1.08  | 0.55  | 0.35  | 1.15  | 0.58  | -0.23 | -0.39 | -0.18 | 0.33  | 1.98  | 1.50  | 0.54 |
| MGC21214   | 124936 | NM_144611    | 8127 | -0.77 | -0.69 | 0.13  | -0.29 | -0.84 | -1.07 | 0.78  | -0.14 | 1.46  | -1.33 | -1.19 | 0.54 |
| ZNF2510    | 93899  | NM_03015516  | 8128 | 1.04  | 0.29  | 1.51  | 0.26  | 0.42  | 0.29  | 0.45  | 0.24  | 0.65  | 0.77  | 0.25  | 0.54 |
| TTF1       | 7080   | NM_003317    | 8129 | 0.09  | -0.82 | -0.91 | -0.68 | -0.64 | -0.84 | 1.11  | -0.42 | -0.15 | -1.63 | -2.16 | 0.54 |
| ANKR06     | 22881  | NM_010492    | 8130 | 0.45  | -0.10 | -0.21 | -0.04 | -0.59 | 0.00  | 0.44  | 0.27  | -0.17 | 0.15  | -0.62 | 0.54 |
| DC2        | 1734   | NM_000078023 | 8131 | 1.49  | 1.41  | 1.48  | 1.46  | 1.18  | 1.49  | 1.18  | 1.49  | 1.41  | 1.68  | 1.46  | 0.54 |
| DCUN1D4    | 23142  | NM_015115    | 8132 | 0.15  | 0.71  | 0.12  | 0.28  | -0.52 | -0.52 | -0.14 | 0.58  | 0.09  | 0.99  | -0.76 | 0.53 |
| LOC25706   | 257106 | NM_181720    | 8133 | 0.77  | -0.23 | -0.08 | 0.29  | -0.37 | -0.01 | 0.28  | 0.34  | 0.12  | 0.47  | -0.10 | 0.53 |
| TNFRF1     | 8377   | NM_0010992   | 8134 | 1.21  | 0.82  | 0.84  | 1.21  | 0.82  | 0.84  | 1.21  | 0.82  | 0.84  | 1.21  | 0.82  | 0.53 |
| FLJ2064    | 54908  | NM_017785    | 8135 | 0.71  | -0.24 | 0.26  | 0.84  | -0.62 | 1.15  | -0.10 | 1.15  | -0.52 | 0.73  | 1.37  | 0.53 |
| MTMR8      | 55613  | NM_017677    | 8136 | 0.67  | 0.08  | 0.52  | -0.14 | -0.47 | 0.08  | 0.08  | 0.18  | 0.27  | 1.27  | -0.54 | 0.53 |
| AKAP12     | 9590   | NM_144497    | 8137 | 0.48  | 0.80  | -0.11 | 0.52  | -0.42 | 0.31  | -0.18 | 0.58  | 0.11  | 1.17  | 0.41  | 0.53 |
| TNFRP101   | 10771  | NM_212479    | 8138 | 0.86  | 0.38  | 0.85  | 0.91  | 0.86  | 0.38  | 0.85  | 0.91  | 0.86  | 0.38  | 0.85  | 0.53 |
| ACTA2      | 59     | NM_001613    | 8139 | -0.13 | -0.01 | -0.10 | -0.42 | -0.53 | -0.16 | 0.41  | 0.12  | 0.01  | -0.24 | -1.11 | 0.53 |
| DZFP564616 | 25874  | NM_015415    | 8140 | 0.54  | -0.27 | -0.20 | -0.37 | -0.25 | -0.48 | 0.97  | -0.48 | 0.04  | 0.07  | -1.10 | 0.53 |
| TRIP2      | 10860  | NM_006677    | 8141 | 0.47  | 0.23  | 0.13  | 0.47  | 0.23  | 0.13  | 0.47  | 0.23  | 0.13  | 0.47  | 0.23  | 0.53 |
| HST1H3B    | 8358   | NM_003537    | 8142 | 0.28  | 0.13  | -0.12 | -0.77 | 0.72  | -0.85 | 1.00  | -0.22 | -0.24 | 0.28  | -0.89 | 0.53 |
| ANKK1      | 252329 | NM_178510    | 8143 | 1.76  | 0.52  | 0.49  | 0.76  | 0.15  | 0.20  | 0.43  | 0.05  | 0.05  | 2.78  | 1.11  | 0.53 |
| ENP2       | 2011   | NM_001424    | 8144 | 2.41  | 0.76  | 0.47  | 0.47  | 1.89  | 0.46  | 0.46  | 0.46  | 0.46  | 0.46  | 0.46  | 0.53 |
| ZNF592     | 9640   | NM_014630    | 8145 | -0.53 | 0.76  | -0.02 | -0.86 | -0.53 | -0.98 | -0.15 | 0.24  | 0.43  | 0.21  | -2.37 | 0.53 |
| PLACA      | 191585 | NM_182832    | 8146 | 0.32  | 0.04  | 0.21  | 0.00  | -0.23 | 0.07  | 0.53  | -0.21 | 0.21  | 0.57  | -0.16 | 0.53 |
| ITP281     | 490    | NM_001862    | 8147 | 2.91  | 1.10  | 0.62  | 1.70  | 2.12  | 0.92  | 0.76  | -0.28 | 0.05  | 4.63  | 4.74  | 0.53 |
| POF        | 64146  | NM_022341    | 8148 | 0.36  | 0.47  | 0.40  | 0.36  | 0.47  | 0.40  | 0.36  | 0.47  | 0.40  | 0.36  | 0.47  | 0.53 |
| COL9A2     | 1298   | NM_001852    | 8149 | -0.71 | -0.15 | 0.35  | -1.46 | -0.42 | -0.47 | -0.08 | -0.01 | 0.62  | -0.50 | -2.35 | 0.53 |
| RPF38      | 10557  | NM_006414    | 8150 | -0.48 | -0.40 | -0.43 | -0.69 | -0.49 | -0.24 | 0.39  | -0.05 | 0.18  | -1.30 | -1.42 | 0.53 |
| RFX1       | 56159  | NM_012176    | 8151 | 0.20  | 0.06  | 0.40  | 0.14  | 0.45  | 0.03  | 0.45  | 0.03  | 0.45  | 0.62  | 0.46  | 0.53 |
| PCDH86     | 56130  | NM_018939    | 8152 | 0.05  | 0.65  | 0.29  | -0.43 | -0.01 | -0.46 | 1.18  | -0.66 | 0.02  | -0.32 | -0.91 | 0.53 |
| BAO        | 572    | NM_032989    | 8153 | -0.29 | 0.48  | 0.00  | 1.35  | -0.01 | 0.73  | -0.39 | 1.03  | -0.12 | 0.19  | 2.07  | 0.53 |
| SRFBP6     | 5360   | NM_002668    | 8154 | 1.13  | 0.41  | 0.29  | 0.76  | 0.72  | 0.54  | 0.76  | 0.72  | 0.54  | 1.84  | 2.01  | 0.53 |
| MGC8082    | 284565 | NM_173638    | 8155 | -0.40 | 0.62  | 0.76  | 0.23  | -0.06 | -0.07 | -0.57 | 0.56  | 0.53  | 0.98  | 0.09  | 0.53 |
| FOH1       | 23149  | NM_015122    | 8156 | -1.40 | -1.28 | -1.71 | -2.35 | -3.07 | -2.86 | -0.11 | 0.60  | 0.03  | -4.39 | -8.29 | 0.53 |
| CAF        | 10152  | NM_005708    | 8157 | -0.01 | -0.89 | 0.10  | -0.14 | -0.11 | -1.26 | -0.09 | -0.75 | 1.36  | -0.80 | -1.51 | 0.53 |
| ITIH2      | 10071  | NM_005963    | 8158 | 0.50  | 0.07  | 0.25  | 0.47  | 0.13  | 0.40  | 0.13  | 0.40  | 0.13  | 0.69  | 0.88  | 0.53 |
| SPINK4     | 27290  | NM_014471    | 8159 | 2.65  | 1.03  | 0.74  | 0.82  | 2.20  | 1.35  | 1.09  | -0.41 | -0.16 | 4.42  | 4.37  | 0.52 |
| TNMM46     | 387914 | NM_001007538 | 8160 | 0.77  | 0.57  | 0.34  | 0.44  | 0.07  | 0.25  | 0.34  | 0.33  | -0.14 | 1.68  | 0.76  | 0.52 |
| TNFR21     | 1199   | NM_000309    | 8161 | 0.39  | 0.41  | 0.58  | 0.45  | 0.12  | -0.24 | 0.45  | 0.12  | -0.24 | 0.62  | 0.10  | 0.52 |
| FLJ20045   | 54797  | NM_017638    | 8162 | 1.32  | 0.81  | 0.76  | 0.20  | -0.33 | 0.71  | 0.29  | 0.64  | -0.40 | 2.89  | 0.58  | 0.52 |
| RECOL      | 5965   | NM_032941    | 8163 | 1.30  | 0.47  | -1.79 | -1.09 | -0.34 | 2.95  | 1.97  | 0.45  | -1.90 | -0.01 | 1.52  | 0.52 |
| HAGE1      | 6489   | NM_001021    | 8164 | 0.72  | -0.25 | -0.61 | 0.13  | -0.66 | 0.09  | 0.13  | -0.66 | 0.09  | 0.03  | 0.29  | 0.52 |
| SPINK3     | 6090   | NM_003122    | 8165 | 0.05  | 0.92  | 0.69  | 0.84  | 0.55  | 0.31  | 0.36  | 0.14  | 0.03  | 2.66  | 1.71  | 0.52 |
| DUSP5      | 1847   | NM_004419    | 8166 | -0.60 | 0.33  | 1.45  | -0.40 | -0.11 | 0.05  | -0.59 | -0.50 | 1.61  | 0.52  | -0.10 | 0.52 |
| CTGA       | 808    | NM_00109186  | 8167 | -0.42 | 0.29  | 0.21  | -0.82 | -0.59 | -0.33 | -0.44 | 1.01  | -0.05 | 0.08  | -1.72 | 0.52 |
| TNFR2      | 2717   | NM_016637    | 8168 | 0.15  | 0.15  | 0.37  | 0.19  | 0.21  | 0.19  | 0.09  | 0.24  | 0.16  | 1.48  | 0.99  | 0.52 |
| DGA        | 2243   | NM_021871    | 8169 | 1.10  | 1.61  | 0.69  | 0.40  | 0.33  | 0.66  | 0.23  | 0.44  | -0.16 | 3.04  | 1.39  | 0.52 |
| FOU1       | 1854   | NM_00102549  | 8170 | 2.22  | 0.58  | 0.81  | 0.20  | 0.41  | 0.13  | 0.80  | -0.32 | 0.04  | 3.60  | 0.74  | 0.52 |
| DRK41      | 5452   | NM_0010945   | 8171 | 0.34  | 0.59  | 0.67  | 0.34  | 0.59  | 0.67  | 0.34  | 0.59  | 0.67  | 0.34  | 0.59  | 0.52 |
| FLJ5395    | 400359 | NM_207444    | 8172 | 0.15  | 0.06  | -0.38 | 0.20  | -0.15 | 0.00  | -0.19 | 0.80  | -0.09 | 0.73  | 0.06  | 0.52 |
| FLJ4503    | 256714 | NM_152780    | 81   |       |       |       |       |       |       |       |       |       |       |       |      |

|           |        |              |      |       |       |       |       |       |       |       |       |       |       |       |      |
|-----------|--------|--------------|------|-------|-------|-------|-------|-------|-------|-------|-------|-------|-------|-------|------|
| FLJ2942   | 121355 | NM_144994    | 8255 | -0.53 | 0.65  | 0.00  | -0.51 | -0.62 | -0.83 | -0.13 | 0.22  | 0.10  | 0.13  | -1.46 | 0.48 |
| FPMT1     | 118971 | NM_175732    | 8256 | -0.04 | -0.37 | 0.03  | -0.05 | -0.04 | -0.34 | 0.10  | 0.34  | 0.04  | -0.40 | -0.22 | 0.48 |
| BF1       | 80135  | NM_020565    | 8257 | 2.57  | 0.51  | 0.76  | 1.30  | 0.48  | 1.50  | 0.39  | 0.18  | 0.09  | 3.84  | 3.28  | 0.48 |
| SGOL2     | 151246 | NM_152524    | 8258 | 0.38  | 0.20  | 0.70  | 0.49  | -0.10 | 0.19  | -0.36 | 0.64  | 0.21  | 1.28  | 0.58  | 0.48 |
| POUG1     | 5480   | NM_203289    | 8259 | 0.13  | 0.66  | 0.63  | 0.29  | 0.01  | 0.32  | -0.07 | 0.36  | 0.18  | 1.42  | 0.62  | 0.48 |
| TCOR6     | 10296  | NM_025616    | 8260 | -0.06 | 0.68  | 0.16  | -0.02 | -0.11 | 0.11  | -0.32 | 0.51  | 0.07  | 0.97  | 1.21  | 0.48 |
| ADSL      | 158    | NM_000206    | 8261 | 0.05  | 0.17  | 0.37  | -0.03 | -0.23 | 0.01  | -0.12 | -0.03 | 0.63  | 0.59  | -0.25 | 0.48 |
| MAPKAP2   | 9261   | NM_032960    | 8262 | -0.30 | 1.13  | 0.14  | -0.54 | -0.51 | -0.01 | -0.46 | 1.20  | -0.27 | 0.97  | -1.06 | 0.48 |
| HMALGA    | 16038  | NM_013972    | 8263 | 0.02  | 0.16  | 0.52  | 0.05  | 0.16  | 0.52  | 0.50  | 0.16  | 0.58  | 2.41  | 0.43  | 0.48 |
| HS4761    | 27292  | NM_012427    | 8264 | -0.85 | -1.04 | -0.55 | -0.38 | -0.38 | -1.46 | -0.69 | -1.14 | 0.22  | -2.44 | -1.46 | 0.48 |
| RHM06     | 79651  | NM_00105498  | 8265 | 0.95  | 1.04  | 0.95  | 0.68  | 0.68  | 0.72  | 0.11  | 0.37  | 0.00  | 2.94  | 2.09  | 0.48 |
| JTS       | 1089   | NM_000694    | 8266 | -0.15 | -0.20 | 0.66  | -0.79 | -0.36 | -0.65 | -0.20 | -0.36 | -0.66 | -1.90 | -1.80 | 0.48 |
| SHH1      | 6477   | NM_003031    | 8267 | 1.45  | 1.52  | 0.22  | 2.61  | 1.62  | 1.41  | -0.37 | 1.23  | -0.38 | 3.19  | 5.64  | 0.48 |
| HR        | 58806  | NM_018411    | 8268 | -0.45 | -0.38 | -0.17 | -0.15 | -0.28 | -0.35 | 0.00  | 0.09  | 0.39  | -1.00 | -0.78 | 0.48 |
| HCP9      | 65991  | NM_023934    | 8269 | 1.85  | 1.58  | 1.62  | 0.44  | 0.69  | 1.29  | 0.46  | 0.09  | -0.07 | 4.55  | 2.42  | 0.48 |
| OST27     | 40239  | NM_001001824 | 8270 | 1.10  | 0.26  | 0.70  | -0.06 | 0.15  | 0.07  | 0.26  | 0.08  | 0.14  | 2.06  | 0.16  | 0.48 |
| PPY       | 5539   | NM_002722    | 8271 | -0.16 | 0.82  | 1.22  | 0.56  | 0.32  | 0.68  | -0.32 | 0.24  | 0.56  | 1.88  | 1.57  | 0.48 |
| ACGN1     | 40     | NM_001094    | 8272 | 0.14  | -0.33 | -0.38 | 0.48  | 1.13  | 0.39  | 0.74  | -0.21 | -0.06 | -0.57 | 1.99  | 0.48 |
| STL5      | 94122  | NM_138780    | 8273 | 0.82  | 0.66  | -0.21 | -0.09 | 1.37  | 0.41  | 1.56  | -0.54 | -0.04 | -0.05 | 1.68  | 0.47 |
| ATP184    | 23439  | NM_012069    | 8274 | -0.31 | -0.32 | -0.24 | -1.09 | -0.95 | -1.16 | 0.39  | -0.29 | 0.38  | -0.87 | -3.21 | 0.47 |
| LOC10     | 414332 | NM_001001712 | 8275 | -0.37 | 0.25  | 1.50  | -0.02 | -0.55 | 0.31  | -0.42 | 0.54  | 0.35  | 1.38  | -0.26 | 0.47 |
| MGC3892   | 414938 | NM_001001794 | 8276 | 0.22  | 0.38  | -0.18 | 0.36  | 0.00  | -0.23 | 0.54  | 0.05  | -0.12 | 0.42  | 0.13  | 0.47 |
| INH       | 3549   | NM_002181    | 8277 | 1.19  | 0.73  | -0.41 | -0.03 | 0.76  | 0.77  | 0.96  | 0.01  | -0.47 | 1.51  | 1.49  | 0.47 |
| TC6       | 27004  | NM_020554    | 8278 | 1.55  | 1.67  | 0.54  | 0.35  | 1.28  | 1.46  | 0.61  | 0.25  | -0.39 | 3.77  | 3.09  | 0.47 |
| MGC10765  | 79299  | NM_024345    | 8279 | -0.14 | 0.39  | 0.79  | 0.29  | 0.15  | 0.72  | -0.20 | 0.45  | 0.22  | 1.05  | 1.16  | 0.47 |
| KS2       | 283455 | NM_173598    | 8280 | -0.68 | -0.62 | 0.50  | -0.69 | -0.78 | -0.32 | 0.35  | 0.13  | 0.01  | -3.80 | -1.79 | 0.47 |
| FLJ1013   | 55116  | NM_018056    | 8281 | 0.55  | 1.06  | 0.47  | -0.03 | 0.23  | 0.05  | 0.18  | 0.46  | -0.17 | 2.08  | 0.26  | 0.47 |
| MHG81     | 3146   | NM_002128    | 8282 | 0.00  | 0.05  | 1.81  | -0.04 | 0.51  | 0.69  | 0.26  | -0.21 | 0.43  | 1.86  | 1.16  | 0.47 |
| HMSP1     | 681    | NM_05032221  | 8283 | 0.30  | 0.32  | 0.44  | -0.11 | -0.07 | 0.21  | 0.71  | 0.06  | 0.00  | -0.38 | 1.83  | 0.47 |
| CCL4      | 6351   | NM_002984    | 8284 | 0.89  | -1.13 | 0.16  | -1.01 | -1.85 | 0.60  | 0.97  | -0.70 | 0.21  | -0.08 | -2.26 | 0.47 |
| C2ORP27   | 54976  | NM_001039140 | 8285 | -0.83 | -0.42 | -0.79 | -1.04 | -0.39 | -0.82 | 0.20  | -0.06 | 0.33  | -2.03 | -2.26 | 0.47 |
| HNAN1A    | 418    | NM_000588    | 8286 | 1.81  | 1.17  | 2.36  | 0.81  | 1.17  | 2.36  | 0.81  | 1.17  | 2.36  | 5.33  | 2.25  | 0.47 |
| LOC15192  | 51232  | NM_016490    | 8287 | 0.61  | -0.51 | 0.06  | -0.50 | -1.20 | -0.30 | 0.35  | -0.10 | 0.22  | 0.10  | 2.00  | 0.47 |
| G10R1     | 349149 | NM_181338    | 8288 | 0.83  | 1.70  | 0.48  | 0.75  | 1.41  | 1.20  | -0.14 | 0.94  | -0.35 | 3.01  | 3.36  | 0.47 |
| LAV1      | 54980  | NM_001160390 | 8289 | -0.54 | 0.50  | -0.13 | -0.28 | -0.82 | 0.34  | -0.34 | 0.59  | -0.12 | -0.17 | -0.77 | 0.47 |
| TMEM308   | 163491 | NM_000117970 | 8290 | 0.41  | 0.49  | 0.06  | 0.42  | 0.28  | 0.07  | 1.32  | 0.12  | 0.14  | 1.14  | 2.11  | 0.47 |
| ROGD      | 79641  | NM_024589    | 8291 | -0.51 | -0.71 | -0.44 | -0.44 | -1.85 | -1.59 | -0.53 | 0.48  | 0.52  | -1.66 | -1.89 | 0.47 |
| JCH4      | 4034   | NM_002139    | 8292 | 0.22  | 0.74  | -0.37 | -0.56 | -0.65 | -0.07 | 0.43  | 0.62  | -0.58 | 0.59  | -1.28 | 0.47 |
| ST57      | 6218   | NM_0010221   | 8293 | -1.93 | -1.38 | 1.24  | -0.27 | 0.59  | 0.62  | 1.57  | 0.26  | -0.59 | -4.55 | -2.33 | 0.47 |
| SLC7A14   | 57709  | NM_020949    | 8294 | 0.77  | 0.31  | -0.05 | -0.06 | 1.01  | 0.79  | 1.45  | -0.46 | -0.52 | 1.04  | 1.74  | 0.47 |
| ZFYV27    | 118813 | NM_00100262  | 8295 | -0.05 | 0.40  | -0.25 | -0.36 | -0.85 | -0.18 | -0.14 | 0.89  | -0.28 | 0.10  | -1.39 | 0.47 |
| PP7A      | 118403 | NM_00100262  | 8296 | 0.29  | -0.20 | 0.48  | 0.48  | 0.48  | 0.48  | 0.48  | 0.48  | 0.48  | 0.47  | 0.28  | 0.47 |
| SLC5B3    | 51000  | NM_015548    | 8297 | 0.31  | 0.92  | -0.23 | -0.12 | -0.07 | -0.36 | 0.36  | 0.24  | -0.14 | 0.99  | 0.56  | 0.47 |
| RAP80     | 51720  | NM_016290    | 8298 | -0.19 | 0.34  | 0.07  | 0.06  | 0.70  | 0.41  | 0.18  | -0.04 | 0.32  | 0.21  | 0.35  | 0.47 |
| PGC2      | 8858   | NM_003891    | 8299 | 0.83  | 0.04  | 0.23  | -0.15 | -0.13 | 0.12  | 0.79  | -0.19 | -0.13 | 1.09  | -0.17 | 0.47 |
| QSOX1     | 92399  | NM_199177    | 8300 | 0.99  | 0.77  | 0.02  | 0.80  | 0.22  | 0.07  | 0.48  | -0.12 | 0.34  | 1.79  | 0.43  | 0.47 |
| TFAP2B    | 7021   | NM_003221    | 8301 | 0.01  | 0.39  | 0.04  | 0.00  | 0.22  | -0.44 | -0.11 | 0.16  | 0.41  | 0.44  | -0.22 | 0.47 |
| MAT2A     | 4144   | NM_005911    | 8302 | -0.76 | -1.00 | -1.57 | -1.85 | -1.72 | -2.44 | 1.16  | 0.21  | -0.91 | -3.33 | -6.00 | 0.46 |
| GENX-0418 | 8987   | NM_000943    | 8303 | 1.87  | 1.65  | 1.50  | 1.87  | 1.65  | 1.50  | 1.87  | 1.65  | 1.50  | 4.66  | 4.50  | 0.46 |
| RNASEH    | 29102  | NM_013235    | 8304 | 2.43  | 1.68  | 1.05  | 1.19  | 1.08  | 0.49  | 0.28  | 0.19  | 0.00  | 5.16  | 2.76  | 0.46 |
| CCNT1     | 904    | NM_001240    | 8305 | 1.09  | 0.08  | -0.09 | 0.80  | 1.57  | -0.54 | 0.66  | -0.64 | 0.44  | 1.07  | 1.84  | 0.46 |
| TCOR27    | 22167  | NM_00100262  | 8306 | 0.72  | 0.85  | 1.04  | 0.65  | 0.72  | 0.85  | 1.04  | 0.65  | 0.72  | 2.60  | 2.18  | 0.46 |
| SAST      | 22983  | NM_014975    | 8307 | 0.79  | 0.14  | 0.61  | 1.62  | 3.62  | 2.80  | 0.81  | -0.17 | -0.18 | 1.54  | 8.04  | 0.46 |
| HD05      | 27336  | NM_014500    | 8308 | 0.40  | 0.17  | 0.19  | 1.30  | 0.99  | 0.01  | -0.20 | 0.09  | 0.57  | 0.76  | 2.28  | 0.46 |
| DDO2      | 162989 | NM_131328    | 8309 | 0.89  | 0.04  | -0.31 | -0.35 | 0.38  | 0.57  | 0.86  | -0.23 | -0.16 | 0.12  | 0.63  | 0.46 |
| LOC41     | 8346   | NM_000299    | 8310 | 0.46  | 0.98  | 0.35  | 0.81  | -0.12 | 0.67  | 0.90  | -0.26 | 1.79  | 1.49  | 0.46  |      |
| GPR116    | 221395 | NM_015234    | 8311 | -0.25 | -0.13 | -0.33 | -0.62 | 0.23  | 0.17  | 0.20  | -0.11 | 0.37  | -0.71 | -0.22 | 0.46 |
| NF1-SF29  | 126620 | NM_145172    | 8312 | -0.36 | -0.43 | 0.19  | -0.49 | -0.20 | -0.83 | 0.30  | -0.31 | 0.47  | -0.61 | -1.51 | 0.46 |
| HCT11     | 2581   | NM_015382    | 8313 | 0.36  | 0.31  | 0.35  | 0.62  | 0.51  | 0.49  | -0.02 | -0.42 | 0.39  | 0.61  | 0.47  | 0.46 |
| PEX13     | 5194   | NM_002618    | 8314 | -0.65 | 0.44  | -1.02 | -0.88 | -1.10 | -0.40 | -0.11 | 1.19  | -0.61 | -1.23 | -2.47 | 0.46 |
| UHP1      | 55559  | NM_207106    | 8315 | -0.36 | 0.64  | -0.45 | 0.02  | 0.48  | -0.40 | -0.07 | 0.46  | 0.07  | -0.16 | 0.30  | 0.46 |
| IKCN1     | 4232   | NM_0010999   | 8316 | -0.08 | 1.19  | 0.50  | -0.13 | -0.15 | 0.52  | -0.33 | 0.36  | 0.62  | 1.62  | -4.34 | 0.46 |
| REC14     | 80349  | NM_025234    | 8317 | 0.75  | 0.29  | 0.59  | -0.10 | 0.82  | 0.29  | 0.80  | -0.26 | -0.08 | 1.63  | 1.00  | 0.46 |
| SRT6      | 51548  | NM_016339    | 8318 | -0.54 | -0.18 | -0.02 | -0.48 | -0.49 | -0.96 | -0.34 | -0.06 | 0.86  | -0.74 | -1.95 | 0.46 |
| KU1       | 3816   | NM_002257    | 8319 | -0.36 | 0.28  | 0.05  | -0.03 | -0.73 | 0.44  | -0.35 | 0.76  | 0.05  | -0.02 | -0.31 | 0.46 |
| SNRPB     | 22892  | NM_016128    | 8320 | 1.71  | 1.55  | 2.31  | 1.82  | 1.89  | 1.74  | 0.56  | 0.26  | 0.06  | 6.06  | 6.69  | 0.46 |
| MGC45731  | 90874  | NM_001080470 | 8321 | -0.01 | -0.79 | 0.31  | -0.30 | 0.62  | -0.35 | 0.18  | -0.66 | 0.95  | -0.47 | -0.03 | 0.46 |
| PPP3C8    | 5532   | NM_001212    | 8322 | -0.09 | 0.15  | 0.63  | 1.20  | 1.68  | 1.12  | 0.41  | -0.32 | 0.37  | 0.70  | 4.00  | 0.46 |
| HP1-C     | 3167   | NM_002117    | 8323 | 0.09  | 0.40  | 0.61  | 0.38  | 0.19  | 0.36  | 0.19  | -0.16 | 0.27  | 0.32  | 0.13  | 0.46 |
| GOR105    | 84830  | NM_032744    | 8324 | -1.13 | -1.20 | -1.22 | -2.32 | -2.37 | -2.07 | 0.51  | -0.31 | 0.25  | -3.55 | -6.77 | 0.46 |
| OMC16     | 219428 | NM_001004701 | 8325 | 1.06  | 1.19  | 0.60  | 0.25  | 0.79  | 0.46  | 0.42  | 0.14  | -0.11 | 2.84  | 1.51  | 0.46 |
| LOC121    | 89     | NM_00100262  | 8326 | -0.26 | -0.53 | 0.41  | -0.12 | -0.65 | 0.11  | -0.12 | 0.35  | 0.12  | -0.10 | -1.70 | 0.46 |
| ABHGAP11A | 9824   | NM_199357    | 8327 | 0.30  | 0.10  | -0.29 | 0.40  | 0.08  | 0.08  | 0.50  | 0.01  | 0.32  | 0.13  | 0.70  | 0.46 |
| ATF1      | 463    | NM_006885    | 8328 | 1.89  | 0.06  | -0.12 | 2.69  | 1.34  | 1.37  | 1.24  | -0.25 | -0.53 | 1.33  | 5.40  | 0.46 |
| UNC9217   | 167555 | NM_205548    | 8329 | 0.35  | 0.39  | 1.48  | 1.99  | 1.94  | 1.18  | -0.24 | -0.23 | 0.93  | 1.95  | 5.11  | 0.46 |
| PR9       | 613    | NM_000661    | 8330 | 1.12  | 1.31  | 1.11  | 1.11  | 1.27  | 1.14  | 0.27  | 0.15  | 0.12  | 3.54  | 6.31  | 0.46 |
| ORS185    | 282763 | NM_001005567 | 8331 | -0.47 | 1.18  | 0.88  | -0.51 | -0.24 | 0.32  | -0.38 | 0.66  | 0.17  | 1.60  | -0.43 | 0.46 |
| CHCHD3    | 54927  | NM_017812    | 8332 | -0.33 | -0.57 | 0.06  | 0.03  | 0.55  | -0.69 | 0.42  | -0.48 | 0.52  | -0.84 | -0.13 | 0.46 |
| HPE1      | 20465  | NM_015296    | 8333 | 0.60  | 0.60  | 0.50  | 0.60  | 0.60  | 0.60  | 0.60  | 0.60  | 0.60  | 0.60  | 0.60  | 0.46 |
| ADPRN12   | 54936  | NM_017825    | 8334 | 1.24  | 1.56  | 0.36  | 1.05  | 1.06  | 0.83  | 0.27  | 0.32  | -0.14 | 3.15  | 2.94  | 0.46 |
| CABLE51   | 91768  | NM_138375    | 8335 | 0.63  | 1.71  |       |       |       |       |       |       |       |       |       |      |

|              |        |              |      |       |       |       |       |       |       |       |       |       |       |       |      |
|--------------|--------|--------------|------|-------|-------|-------|-------|-------|-------|-------|-------|-------|-------|-------|------|
| PK62         | 5553   | NM_002728    | 8417 | 0.01  | 0.10  | -0.68 | 0.00  | -0.16 | -0.43 | -0.04 | 0.78  | 0.32  | -0.58 | -0.58 | 0.42 |
| PTMA         | 64569  | NM_01030209  | 8418 | -0.15 | -0.38 | 0.79  | -0.12 | 0.22  | -0.14 | -0.34 | 0.26  | 0.05  | -0.13 | -0.18 | 0.25 |
| LL8          | 3606   | NM_001562    | 8419 | 0.62  | 0.16  | 1.40  | 0.33  | 0.30  | 0.33  | 0.03  | -0.38 | 0.76  | 2.18  | 0.96  | 0.42 |
| ARHGFE10     | 9639   | NM_014629    | 8420 | 0.30  | 1.49  | 1.58  | 0.54  | -0.40 | 0.10  | -0.52 | 0.60  | 0.35  | 3.37  | 0.24  | 0.42 |
| ACADL        | 93     | NM_001028    | 8421 | 0.27  | 0.12  | 0.75  | 0.40  | -0.09 | -0.13 | -0.30 | 0.36  | 0.36  | 1.18  | 0.17  | 0.42 |
| EN1          | 14659  | NM_152463    | 8422 | 1.83  | 1.11  | 1.00  | 1.02  | 2.32  | 2.45  | 0.12  | 0.79  | 0.44  | 7.94  | 6.65  | 0.42 |
| KIAA2002     | 79834  | NM_370878    | 8423 | 0.16  | 0.05  | 1.16  | -0.13 | -0.14 | 0.09  | -0.25 | 0.53  | 0.14  | 1.37  | -0.18 | 0.42 |
| PLAUR        | 5329   | NM_001003377 | 8424 | 0.39  | 0.46  | -1.05 | 0.22  | -0.13 | -1.41 | -0.01 | 0.72  | -0.28 | -0.20 | -1.33 | 0.42 |
| TTOM         | 2110   | NM_001003377 | 8425 | 0.63  | 0.61  | 0.60  | 0.45  | 0.45  | 0.45  | 0.15  | 0.34  | 0.15  | 1.34  | 0.20  | 0.42 |
| LOC56964     | 56964  | NM_020212    | 8426 | -0.15 | 1.43  | 1.00  | 2.97  | 0.83  | 2.09  | -0.10 | 0.51  | 0.00  | 2.48  | 5.00  | 0.42 |
| KIAA1049     | 22980  | NM_014972    | 8427 | 0.40  | 0.73  | 0.32  | 0.44  | 0.67  | 1.73  | 0.30  | 0.49  | 0.37  | 1.45  | 2.84  | 0.42 |
| ALF3         | 5162   | NM_010095    | 8428 | 0.88  | -0.07 | -0.03 | 0.18  | -0.07 | -0.14 | -0.23 | 0.00  | 0.14  | 0.88  | -1.45 | 0.42 |
| PRKBC1       | 5579   | NM_212535    | 8429 | 0.28  | 0.75  | -0.03 | 0.22  | 0.22  | -0.51 | -0.16 | 0.22  | 0.36  | 0.43  | 0.08  | 0.42 |
| TTIC16       | 158248 | NM_144965    | 8430 | 0.34  | 0.97  | 0.23  | -0.40 | -0.03 | 0.01  | 0.26  | 0.28  | -0.12 | 1.53  | -0.42 | 0.42 |
| FOE1         | 2304   | NM_004473    | 8431 | -0.65 | -0.38 | 0.11  | -1.38 | -0.08 | -0.76 | 0.17  | -0.39 | 0.64  | -0.92 | -2.22 | 0.42 |
| PO2          | 54623  | NM_010908    | 8432 | 0.10  | 0.23  | -0.10 | 1.30  | 1.32  | 0.07  | 0.05  | -0.46 | 0.81  | 0.23  | 0.63  | 0.42 |
| ARMETL1      | 441549 | NM_00102954  | 8433 | -0.52 | -0.85 | 0.06  | -0.93 | -1.21 | -0.46 | -0.12 | -0.14 | 0.68  | -1.31 | -2.59 | 0.42 |
| NBC1         | 2908   | NM_00102825  | 8434 | -0.39 | -0.06 | 0.26  | -0.27 | -0.31 | -0.03 | 0.00  | 0.25  | 0.17  | -0.19 | -0.59 | 0.42 |
| CGA2         | 1260   | NM_005140    | 8435 | -0.09 | 0.01  | 0.53  | 0.73  | -0.12 | 0.48  | -0.28 | 0.08  | 0.71  | 0.25  | 1.10  | 0.42 |
| AMID         | 84883  | NM_032797    | 8436 | -0.01 | -0.24 | 1.27  | -0.47 | -0.58 | -0.20 | -0.34 | 0.17  | 0.59  | 1.01  | -1.25 | 0.41 |
| SP192        | 60313  | NM_021639    | 8437 | -0.74 | -0.62 | -0.62 | -0.39 | 0.03  | -0.74 | 0.03  | -0.22 | 0.60  | -1.99 | -1.10 | 0.41 |
| NAP4A4       | 9448   | NM_004834    | 8438 | -0.36 | -0.69 | -0.49 | -1.38 | -1.61 | -1.19 | 0.08  | 0.22  | 0.11  | -1.54 | -1.18 | 0.41 |
| CX3C1        | 6376   | NM_002996    | 8439 | 0.14  | 1.03  | 0.89  | 0.19  | 1.11  | -0.01 | 0.44  | -0.15 | 1.00  | 2.07  | 1.29  | 0.41 |
| URO          | 7390   | NM_000375    | 8440 | -0.89 | -0.59 | -1.07 | -1.36 | -1.34 | -0.90 | 0.05  | 0.82  | -0.45 | -2.54 | -3.60 | 0.41 |
| IFLN         | 51474  | NM_016157    | 8441 | 1.54  | -0.53 | 0.22  | 0.28  | -0.68 | -0.27 | 0.21  | -1.18 | 0.38  | 1.23  | -0.67 | 0.41 |
| FLJ12119     | 84130  | NM_032168    | 8442 | 0.66  | -0.04 | -0.81 | 0.04  | -0.23 | -0.20 | 0.87  | -0.09 | 0.38  | -0.39 | -0.39 | 0.41 |
| SLC2A3       | 6515   | NM_006931    | 8443 | 0.07  | 0.59  | -0.30 | -0.39 | -0.33 | -0.88 | 0.07  | 0.27  | 0.07  | 0.36  | -1.60 | 0.41 |
| C19ORF29     | 58509  | NM_021231    | 8444 | -0.89 | -1.38 | -1.52 | -1.99 | -3.32 | -1.66 | 0.11  | 0.66  | -0.37 | -3.79 | -6.97 | 0.41 |
| C12A2        | 7461   | NM_001421    | 8445 | 0.01  | 0.00  | 0.71  | 0.16  | 0.25  | 0.18  | 0.56  | -0.25 | 0.48  | 0.70  | 0.47  | 0.41 |
| LOC164153    | 164153 | NM_203412    | 8446 | 1.81  | 1.69  | 1.69  | 1.50  | 0.38  | 0.28  | -0.05 | 0.22  | 0.25  | 5.18  | 2.16  | 0.41 |
| RUVBL2       | 108956 | NM_006666    | 8447 | -1.10 | -0.73 | 0.92  | -0.88 | -1.35 | 0.07  | -0.60 | 0.11  | 0.90  | -0.90 | -2.15 | 0.41 |
| SFR1         | 3948   | NM_0105109   | 8448 | 0.76  | 0.10  | 0.20  | 0.70  | 0.56  | 0.77  | -0.03 | 0.70  | 0.12  | 2.56  | 1.77  | 0.41 |
| LOC728215    | 728215 | NM_00106986  | 8449 | -0.10 | -0.48 | -0.24 | -0.70 | -0.20 | -0.11 | 0.55  | -0.36 | 0.21  | -0.82 | -1.01 | 0.41 |
| E2F3         | 1871   | NM_001949    | 8450 | 1.21  | 0.44  | 0.89  | 0.78  | 0.81  | 0.89  | 0.60  | -0.11 | -0.08 | 2.54  | 2.48  | 0.41 |
| FAP2         | 80534  | NM_024969    | 8451 | 0.89  | -0.37 | -0.08 | 0.45  | 0.82  | 1.33  | 0.74  | -0.02 | -0.31 | 0.44  | 2.38  | 0.41 |
| KIA0562      | 9793   | NM_00100904  | 8452 | 0.53  | 0.00  | -0.27 | 0.62  | 0.37  | 0.30  | 0.12  | 0.39  | 0.30  | 1.08  | 1.60  | 0.41 |
| LDHD         | 192757 | NM_194436    | 8453 | -0.55 | -0.19 | -0.02 | -0.76 | -0.41 | -0.54 | -0.04 | 0.36  | 0.08  | -0.76 | -1.71 | 0.41 |
| CORF98       | 158907 | NM_152572    | 8454 | 0.92  | 0.67  | -0.03 | 0.73  | -0.41 | 0.58  | 0.26  | 0.61  | -0.46 | 1.55  | 0.91  | 0.41 |
| HST1K093     | 85236  | NM_00100904  | 8455 | 0.26  | 0.07  | 0.75  | 0.08  | 0.19  | 0.22  | 0.22  | 0.22  | 0.08  | 1.08  | 1.60  | 0.41 |
| C10ORF68     | 79741  | NM_024688    | 8456 | -0.51 | -0.38 | -0.52 | -0.94 | 0.60  | 0.41  | 0.68  | -0.13 | -0.14 | -1.42 | -0.07 | 0.41 |
| CRYBA4       | 1413   | NM_001886    | 8457 | -0.36 | -0.48 | -0.38 | -0.74 | -1.26 | -0.63 | 0.79  | -0.31 | -0.07 | -1.23 | -2.64 | 0.40 |
| DT1          | 55070  | NM_0010995   | 8458 | -0.07 | -0.46 | 0.27  | -0.41 | 0.86  | 0.07  | -0.61 | 0.29  | 0.33  | -0.22 | 0.62  | 0.40 |
| S100A1       | 6271   | NM_006271    | 8459 | 0.00  | 0.89  | 0.39  | 2.68  | 1.34  | 2.07  | -0.61 | 1.61  | -0.60 | 6.09  | 6.00  | 0.40 |
| FLJ13291     | 84138  | NM_032178    | 8460 | 0.01  | -0.36 | 0.89  | -0.66 | -0.33 | -0.44 | 0.21  | -0.30 | 0.49  | 0.54  | -1.43 | 0.40 |
| RNF123       | 63891  | NM_022064    | 8461 | -0.72 | 0.00  | 0.08  | -0.48 | 0.73  | -0.42 | -0.08 | -0.20 | 0.68  | -0.63 | -0.17 | 0.40 |
| NCKX1        | 23137  | NM_015110    | 8462 | 0.16  | 1.13  | 0.99  | 0.01  | 0.00  | 0.01  | 0.00  | 0.01  | 0.00  | 1.19  | 0.79  | 0.40 |
| C5ORF14      | 79770  | NM_004715    | 8463 | 0.46  | 0.01  | 0.76  | -0.16 | -0.27 | 0.00  | -0.20 | 0.07  | 0.54  | 1.23  | -0.11 | 0.40 |
| GPR112       | 139578 | NM_153834    | 8464 | 0.76  | 0.42  | 0.54  | -0.10 | 0.57  | 0.39  | 0.34  | -0.15 | 0.21  | 1.72  | 0.86  | 0.40 |
| CORF17       | 5455   | NM_0010948   | 8465 | 0.20  | 0.12  | 0.36  | 0.15  | 0.12  | 0.16  | 0.15  | 0.12  | 0.16  | 0.77  | 1.76  | 0.40 |
| WNS1ABP      | 10625  | NM_006469    | 8466 | 0.88  | 0.94  | 0.31  | 0.77  | 1.08  | 1.04  | 0.19  | 0.44  | -0.23 | 2.13  | 2.90  | 0.40 |
| E6LN3        | 112399 | NM_022073    | 8467 | 1.58  | 0.03  | 0.14  | 0.26  | 0.21  | 0.26  | 0.43  | -0.14 | 0.11  | 1.64  | 0.74  | 0.40 |
| NFICD4       | 255125 | NM_181719    | 8468 | 0.66  | 0.81  | 0.64  | 0.81  | 0.61  | 0.43  | 0.11  | 0.19  | 0.31  | 2.90  | 0.76  | 0.40 |
| TUBR1        | 142940 | NM_139169    | 8469 | -0.81 | -0.53 | -0.60 | -1.13 | 0.25  | -0.96 | -0.36 | -0.08 | 0.84  | -1.84 | -0.85 | 0.40 |
| LOC56931     | 56931  | NM_020175    | 8470 | -0.21 | 1.04  | 0.26  | 1.21  | 3.15  | 0.78  | -0.54 | 1.20  | -0.27 | 1.10  | 5.14  | 0.40 |
| FLJ4588      | 22154  | NM_152726    | 8471 | 1.20  | 0.97  | 0.60  | 0.81  | 0.31  | 0.76  | 0.17  | 0.10  | 0.12  | 2.77  | 1.88  | 0.40 |
| MGCC1978     | 84956  | NM_032880    | 8472 | 0.08  | 0.41  | 0.79  | -0.26 | -0.61 | -0.61 | 0.04  | 0.13  | 0.00  | 1.12  | 1.16  | 0.40 |
| ARH1         | 9077   | NM_004675    | 8473 | -0.52 | 2.70  | 2.37  | 1.24  | 1.19  | 1.96  | -0.89 | 0.82  | 0.47  | 4.55  | 4.40  | 0.40 |
| ABO          | 28     | NM_020469    | 8474 | 2.43  | 0.69  | 0.18  | 0.60  | 1.05  | 0.21  | 0.93  | 0.25  | -0.29 | 3.29  | 1.44  | 0.40 |
| IFI163       | 932    | NM_203416    | 8475 | 0.94  | -0.14 | 0.08  | 0.15  | 0.34  | 0.17  | 0.63  | -0.17 | 0.88  | 1.08  | 0.39  | 0.40 |
| CRSP9        | 9443   | NM_004270    | 8476 | 0.87  | 0.31  | 0.83  | -0.02 | -0.27 | -0.27 | 0.11  | 0.04  | 0.24  | 2.01  | -0.56 | 0.39 |
| TNK          | 23043  | NM_015028    | 8477 | 0.30  | -0.13 | -0.37 | -0.32 | -0.11 | -0.03 | 0.66  | 0.00  | -0.26 | -0.20 | -0.46 | 0.39 |
| NFASD01      | 37978  | NM_01030289  | 8478 | 0.61  | 0.45  | 0.37  | 0.14  | -0.40 | 0.49  | -0.11 | 0.37  | 0.11  | 1.43  | -0.06 | 0.39 |
| OLFML3       | 118427 | NM_058170    | 8479 | 0.20  | 0.44  | 0.01  | 1.00  | 0.31  | 0.33  | -0.23 | 0.36  | 0.26  | 0.65  | 1.64  | 0.39 |
| ITGA2        | 9452   | NM_004867    | 8480 | 1.56  | 1.31  | 1.95  | 0.56  | 1.61  | 1.74  | 0.53  | -0.12 | -0.02 | 4.82  | 3.91  | 0.39 |
| CLCN7        | 1136   | NM_001287    | 8481 | -0.19 | -0.06 | 0.14  | -0.08 | -0.12 | 0.06  | 0.34  | 0.16  | -0.11 | -0.11 | -0.14 | 0.39 |
| ENY2         | 2018   | NM_004098    | 8482 | 0.58  | 0.14  | 0.36  | 0.49  | 0.26  | 0.26  | 0.76  | 0.20  | 0.18  | 1.08  | 1.37  | 0.39 |
| DKFZP761G058 | 152926 | NM_152542    | 8483 | 0.57  | 0.59  | 0.62  | 0.45  | 0.31  | -0.10 | 0.13  | 0.03  | 0.23  | 1.79  | 0.65  | 0.39 |
| SYT14L       | 83851  | NM_031914    | 8484 | -0.03 | 0.32  | -0.01 | -0.39 | 0.05  | 0.13  | 0.13  | 0.13  | 0.13  | 0.34  | -0.22 | 0.39 |
| ICGBP        | 887    | NM_002890    | 8485 | 0.25  | 0.21  | -0.11 | 0.15  | 0.16  | 0.00  | 0.14  | 0.00  | 0.14  | 0.67  | 1.47  | 0.39 |
| C20ORF178    | 128866 | NM_176812    | 8486 | -0.07 | 1.04  | 0.00  | 0.53  | 1.14  | 0.41  | 0.29  | 0.02  | 0.08  | 1.17  | 2.07  | 0.39 |
| TBG          | 6996   | NM_00100841  | 8487 | 0.24  | 1.50  | 0.00  | 0.17  | 0.39  | -0.22 | -0.30 | 0.50  | 0.18  | 1.75  | 0.33  | 0.39 |
| HPCD09       | 2959   | NM_00100331  | 8488 | -0.80 | -0.83 | -0.13 | -0.88 | -0.88 | -0.68 | -1.13 | -0.62 | -1.22 | -0.64 | -2.78 | 0.39 |
| TBAF1        | 7185   | NM_005658    | 8489 | 0.53  | 0.73  | -0.25 | -0.80 | -0.38 | -0.79 | 0.31  | -0.23 | 0.31  | 1.51  | -1.97 | 0.39 |
| LACTB        | 114294 | NM_171846    | 8490 | 0.46  | -0.39 | 0.21  | -0.32 | -0.50 | 0.09  | 0.56  | -0.15 | -0.03 | 0.27  | -0.72 | 0.39 |
| TPALPUSH     | 116931 | NM_053002    | 8491 | 0.38  | 0.85  | -0.60 | 1.19  | -0.23 | 0.34  | 0.04  | 0.91  | -0.55 | 0.63  | 1.10  | 0.39 |
| LOC7         | 8417   | NM_005659    | 8492 | 0.59  | 0.68  | 0.47  | 0.42  | 0.04  | -0.54 | -0.40 | 0.14  | -0.31 | 0.76  | 0.36  | 0.39 |
| USC7H        | 51599  | NM_205835    | 8493 | -0.62 | -0.22 | -0.59 | -0.68 | -1.41 | -1.42 | -0.32 | 0.52  | 0.20  | -1.42 | -3.50 | 0.39 |
| MOY18        | 4430   | NM_012223    | 8494 | -0.45 | 0.03  | 0.53  | 0.02  | -0.04 | -0.80 | -0.38 | 0.03  | 0.74  | 0.11  | -0.82 | 0.39 |
| TBRM12       | 20705  | NM_0152616   | 8495 | 0.56  | -0.11 | 0.11  | 0.14  | 0.11  | 0.11  | 0.11  | 0.11  | 0.11  | 0.60  | 0.56  | 0.39 |
| ANKA2        | 302    | NM_004039    | 8496 | -0.23 | -0.17 | -0.34 | 0.04  | 0.75  | 0.14  | 0.36  | 0.00  | 0.02  | 0.74  | 0.93  | 0.39 |
| FLJ20481     | 54947  | NM_017839    |      |       |       |       |       |       |       |       |       |       |       |       |      |

|           |        |             |      |       |       |       |       |       |       |       |       |       |       |       |      |
|-----------|--------|-------------|------|-------|-------|-------|-------|-------|-------|-------|-------|-------|-------|-------|------|
| RHPC      | 11035  | NM_006871   | 8579 | 0.33  | 0.30  | -0.17 | -0.21 | 0.02  | -0.74 | -0.03 | 0.40  | -0.02 | 0.45  | -0.93 | 0.35 |
| FAO2      | 6185   | NM_020157   | 8588 | 0.25  | -0.21 | -0.25 | -0.32 | 0.40  | -0.38 | 0.83  | -0.19 | 0.20  | -0.21 | -1.44 | 0.25 |
| UNC93A    | 54346  | NM_018974   | 8581 | 0.25  | 0.32  | -0.31 | -0.90 | -0.89 | -0.92 | 0.04  | 0.27  | 0.03  | -0.93 | 2.70  | 0.34 |
| SNAP25    | 6616   | NM_130811   | 8582 | -0.15 | -0.06 | 0.56  | -0.54 | 1.67  | -0.39 | 0.17  | -0.58 | 0.75  | 0.36  | 0.75  | 0.34 |
| CAPN7     | 23473  | NM_014296   | 8585 | 0.06  | 0.65  | 0.12  | 0.21  | 0.34  | 0.22  | 0.15  | 0.05  | 0.15  | 1.45  | 0.77  | 0.34 |
| KIA1971   | 32320  | NM_009045   | 8584 | 0.18  | 0.36  | 0.17  | -0.09 | 0.84  | -0.57 | 0.84  | -0.57 | 0.84  | 0.55  | 1.13  | 0.34 |
| PCDHGB7   | 56999  | NM_032101   | 8585 | -0.29 | -0.24 | -0.48 | -0.25 | -0.87 | -0.50 | -0.20 | 0.67  | -0.12 | -1.01 | -1.62 | 0.34 |
| WBCSD2QA  | 55695  | NM_148956   | 8586 | 0.46  | 0.51  | 1.30  | 1.26  | 0.84  | 0.22  | -0.81 | 0.19  | 0.96  | 1.35  | 2.22  | 0.34 |
| DIS228E   | 799    | NM_005671   | 8587 | 0.12  | 0.60  | 0.04  | -0.09 | 0.49  | 0.20  | 0.40  | -0.09 | 0.20  | 0.53  | 1.24  | 0.34 |
| PRKCN     | 23683  | NM_005813   | 8588 | -0.09 | -0.24 | 0.38  | -0.21 | 0.24  | 0.18  | 0.17  | -0.41 | 0.58  | 0.23  | 0.20  | 0.34 |
| FLJ2800   | 196951 | NM_152647   | 8589 | 0.72  | 0.11  | 0.29  | -0.53 | -0.16 | -0.38 | 0.52  | -0.32 | 0.13  | 1.12  | -1.07 | 0.34 |
| LOC544148 | 64444  | NM_010136   | 8590 | -1.47 | -1.57 | -0.48 | -0.78 | -1.52 | -0.57 | -0.78 | -1.52 | -0.57 | -0.78 | -1.52 | 0.34 |
| CGH26     | 401251 | NM_00103651 | 8591 | 0.93  | 0.67  | 0.76  | -1.26 | -1.15 | -0.54 | -0.48 | -0.80 | 1.62  | -0.84 | -1.95 | 0.34 |
| CAA       | 8592   | NM_007293   | 8592 | -0.19 | 0.47  | 1.38  | 0.48  | 0.35  | 0.36  | -0.19 | 0.20  | 0.33  | 2.04  | 1.18  | 0.34 |
| BCP1      | 113452 | NM_033504   | 8593 | -0.13 | -0.94 | -0.89 | -1.49 | -1.46 | -1.10 | -0.29 | 0.95  | -0.32 | -2.96 | -4.05 | 0.34 |
| FNBL1     | 3456   | NM_002176   | 8594 | 0.53  | 0.35  | 2.90  | 2.02  | 1.81  | 1.49  | -0.49 | 0.21  | 0.62  | 4.77  | 5.32  | 0.34 |
| S100A9    | 6280   | NM_002965   | 8595 | -0.20 | 1.01  | -0.03 | -0.56 | -0.08 | -0.27 | -0.02 | 0.40  | -0.05 | 0.78  | -0.91 | 0.34 |
| CUCDC1    | 404093 | NM_017949   | 8596 | 0.38  | 0.35  | -0.29 | -0.49 | -0.16 | 0.14  | 0.45  | 0.28  | -0.39 | 0.45  | -0.52 | 0.34 |
| LTR9      | 4054   | NM_002100   | 8597 | 1.22  | -0.41 | -0.47 | 0.37  | -0.65 | 0.00  | 1.20  | -0.28 | -0.48 | 0.33  | 0.29  | 0.33 |
| RP516     | 6217   | NM_001020   | 8598 | -0.95 | -1.45 | -1.55 | -1.27 | -2.26 | -1.65 | -0.03 | 0.27  | 0.09  | -3.95 | -5.18 | 0.33 |
| CPH2      | 3080   | NM_005666   | 8599 | -0.06 | 1.31  | -0.74 | -0.17 | -0.26 | 0.10  | -0.17 | 1.05  | -0.54 | 0.51  | 0.00  | 0.33 |
| FLJ21415  | 79794  | NM_020478   | 8600 | 0.09  | -0.91 | 0.57  | 0.88  | 0.59  | 0.91  | -0.07 | -0.70 | 1.11  | -0.24 | -2.39 | 0.33 |
| C7R       | 1080   | NM_000492   | 8601 | 0.08  | 0.25  | -0.18 | -0.44 | -0.33 | -1.19 | 0.07  | -0.29 | 0.55  | -0.34 | 1.96  | 0.33 |
| POTER     | 340441 | NM_00100200 | 8602 | -0.50 | -0.10 | -0.14 | -0.78 | -0.38 | -0.35 | 0.13  | 0.07  | 0.13  | -0.73 | -1.50 | 0.33 |
| KIA1196   | 57473  | NM_020713   | 8603 | -0.09 | -0.34 | 1.32  | 0.14  | -0.44 | 0.34  | -0.26 | -0.06 | 0.64  | 0.89  | 0.04  | 0.33 |
| FLJ0081   | 55638  | NM_00115916 | 8604 | -0.90 | -0.96 | -1.34 | -1.38 | -1.03 | 2.00  | 0.09  | 0.24  | 0.00  | -3.20 | -5.31 | 0.33 |
| PECI      | 10455  | NM_006617   | 8605 | 0.96  | 0.18  | 0.92  | 0.46  | 0.32  | 0.14  | 0.15  | 0.02  | 0.15  | 2.06  | 0.92  | 0.33 |
| AFAP      | 60312  | NM_198995   | 8606 | 0.51  | 0.02  | 0.13  | 1.38  | 0.27  | 1.28  | 0.45  | -0.11 | 0.00  | 0.66  | 2.94  | 0.33 |
| FNBL2     | 1867   | NM_007174   | 8607 | 1.49  | 0.02  | 0.64  | 0.16  | 0.92  | 0.16  | 0.92  | 0.16  | 0.92  | 2.13  | 1.19  | 0.33 |
| HEY1      | 23402  | NM_012258   | 8608 | 0.28  | 0.95  | -0.17 | -0.95 | -0.23 | -1.06 | 0.51  | -0.78 | 0.60  | -0.84 | -2.25 | 0.33 |
| CARD10    | 29775  | NM_014550   | 8609 | 0.26  | 0.40  | -0.20 | -0.49 | -0.09 | -1.13 | -0.29 | -0.12 | 0.75  | 1.10  | -0.73 | 0.33 |
| HCN1L3    | 3169   | NM_001242   | 8610 | 0.68  | 0.31  | 0.56  | 0.61  | 1.22  | 0.68  | 0.11  | 0.56  | 0.61  | 2.75  | 2.34  | 0.33 |
| ADAM1510  | 81794  | NM_030957   | 8611 | 0.44  | 0.04  | -0.07 | -0.49 | -0.74 | 0.24  | 0.59  | 0.11  | -0.37 | -0.41 | -1.48 | 0.33 |
| ZNF7      | 7553   | NM_003416   | 8612 | -0.26 | 0.66  | -0.11 | -0.18 | -0.60 | -0.42 | -0.37 | 0.67  | 0.03  | 0.29  | -1.19 | 0.33 |
| UNC1540   | 395538 | NM_205855   | 8613 | -0.29 | 0.08  | 0.11  | 0.12  | 0.00  | -0.49 | -0.38 | 0.32  | 0.39  | -1.10 | -0.34 | 0.33 |
| UNC163    | 75187  | NM_00104899 | 8614 | 1.34  | 1.01  | 0.96  | 1.12  | 0.66  | 1.12  | 0.66  | 1.12  | 0.66  | 5.30  | 5.14  | 0.33 |
| MAF       | 4094   | NM_005360   | 8615 | -0.47 | -0.42 | -0.65 | 0.78  | -0.40 | 0.10  | 0.20  | 0.03  | -1.54 | -0.01 | 0.33  | 0.33 |
| CNNM1     | 26507  | NM_020348   | 8616 | 0.16  | -0.21 | 0.42  | 0.11  | 0.11  | 0.90  | 0.34  | -0.16 | 0.14  | 0.37  | 1.11  | 0.33 |
| MGCL1225  | 8441   | NM_002193   | 8617 | 0.96  | 0.35  | 0.47  | 0.08  | -0.25 | 0.04  | -0.15 | 0.04  | -0.15 | 1.99  | 0.12  | 0.33 |
| INH8      | 3625   | NM_002193   | 8618 | 1.61  | 0.73  | 1.06  | 1.22  | 0.02  | 1.68  | 0.74  | 0.06  | -0.47 | 3.40  | 1.82  | 0.33 |
| LOC39344  | 339344 | NM_00102643 | 8619 | 1.96  | 3.13  | 1.54  | 2.38  | 2.17  | 2.74  | -0.19 | 0.44  | 0.07  | 6.64  | 7.28  | 0.33 |
| ACT2      | 47     | NM_000000   | 8620 | 0.26  | 0.05  | 0.55  | -0.26 | 0.26  | 1.09  | 0.26  | 1.09  | 0.26  | 4.67  | 1.35  | 0.32 |
| LOC113730 | 113730 | NM_138443   | 8621 | 0.01  | -0.08 | -0.40 | -0.46 | -0.76 | -1.02 | 0.02  | 0.49  | -0.18 | -0.67 | -2.24 | 0.32 |
| ZNF32     | 7580   | NM_006973   | 8622 | 1.68  | -0.80 | 0.34  | 0.33  | 0.31  | 0.58  | 1.00  | -0.98 | 0.31  | 1.22  | 1.22  | 0.32 |
| CDIC      | 911    | NM_001765   | 8623 | 0.77  | 0.68  | 1.33  | 0.12  | 0.07  | 0.79  | 0.00  | 0.31  | 0.00  | 2.76  | 0.95  | 0.32 |
| INTK1     | 4914   | NM_00107792 | 8624 | 0.74  | -0.10 | 0.13  | 0.22  | -0.37 | 0.07  | 0.17  | -0.37 | 0.07  | 0.76  | 0.13  | 0.32 |
| KND1C1    | 85442  | NM_033404   | 8625 | 0.87  | -0.13 | 0.00  | -0.14 | -0.45 | 0.66  | 0.60  | 0.13  | -0.41 | 0.74  | 0.06  | 0.32 |
| FLR0651   | 146547 | NM_173502   | 8626 | 1.00  | 0.43  | 0.46  | 0.70  | -0.16 | -0.38 | -0.12 | 0.09  | 0.35  | 1.89  | 1.19  | 0.32 |
| DAD15     | 2326   | NM_002991   | 8627 | 0.77  | 0.14  | 0.14  | 0.17  | 0.14  | 0.14  | 0.17  | 0.14  | 0.14  | 2.95  | 1.01  | 0.32 |
| PSMAS     | 5686   | NM_002790   | 8628 | 0.81  | 0.97  | -0.25 | 1.17  | 0.02  | -0.20 | -0.13 | 0.46  | -0.01 | 1.53  | 0.99  | 0.32 |
| KRTAP-1   | 83896  | NM_031598   | 8629 | 0.86  | 0.10  | 0.61  | 0.10  | -0.21 | -0.24 | 0.12  | -0.15 | 0.35  | 1.57  | -0.36 | 0.32 |
| SAMD9     | 5489   | NM_001654   | 8630 | 1.44  | 1.43  | 0.43  | 0.75  | 0.40  | -0.03 | 1.44  | 1.43  | 0.43  | 4.22  | 1.98  | 0.32 |
| CFR2      | 132864 | NM_182646   | 8631 | -0.25 | -0.51 | 0.37  | -0.72 | -0.17 | -0.03 | 0.19  | -0.19 | 0.31  | -0.39 | -0.92 | 0.32 |
| DM3       | 1857   | NM_004423   | 8632 | 0.38  | 0.11  | -0.66 | 0.07  | -0.46 | -0.01 | 0.41  | 0.45  | -0.55 | -0.39 | -0.39 | 0.32 |
| ABLIM3    | 22895  | NM_019495   | 8633 | 2.23  | 1.04  | 1.48  | 0.51  | 0.88  | 0.98  | 0.66  | -0.16 | -0.18 | 4.74  | 2.37  | 0.32 |
| LOC15168  | 8453   | NM_025511   | 8634 | 0.92  | 0.18  | 0.45  | 0.21  | 2.08  | 0.48  | -0.53 | 0.43  | 0.42  | 6.34  | 1.87  | 0.32 |
| PNAS-4    | 51029  | NM_016076   | 8635 | 0.73  | 1.05  | 1.33  | 0.85  | 0.40  | 0.33  | -0.23 | 0.09  | 0.46  | 3.11  | 1.57  | 0.32 |
| INSL6     | 11172  | NM_007179   | 8636 | -0.17 | 0.50  | 0.68  | -0.06 | 0.31  | -0.19 | -0.42 | 0.05  | 0.68  | 1.02  | 0.06  | 0.32 |
| PNF54     | 50382  | NM_144976   | 8637 | 0.98  | 0.40  | 0.63  | 0.81  | 0.36  | 0.63  | 0.20  | 0.63  | 0.20  | 1.66  | 0.32  | 0.32 |
| SRP8      | 58477  | NM_021203   | 8638 | 0.24  | 0.61  | 0.24  | -0.34 | -0.07 | -0.40 | 0.25  | 0.01  | 0.06  | 1.09  | -0.82 | 0.32 |
| CPH1      | 3078   | NM_002113   | 8639 | 0.15  | 0.12  | -0.45 | -0.68 | -0.25 | -0.05 | 0.25  | 0.21  | -0.15 | -0.17 | -0.98 | 0.32 |
| PCYH991   | 11471  | NM_020891   | 8640 | 0.54  | 1.23  | 1.33  | 0.41  | -0.25 | 0.41  | 0.46  | 0.41  | 0.46  | 3.10  | 1.56  | 0.32 |
| CKL5      | 6374   | NM_002994   | 8641 | 0.25  | -0.09 | 0.72  | 0.50  | 0.19  | 0.57  | 0.02  | 0.03  | 0.26  | 0.89  | 1.26  | 0.31 |
| C14ORF171 | 57156  | NM_020431   | 8642 | -0.36 | 1.10  | -0.12 | 0.25  | 0.11  | -0.39 | -0.42 | 0.67  | 0.06  | 0.62  | -0.02 | 0.31 |
| PUNC      | 9543   | NM_004884   | 8643 | 1.39  | 0.26  | 0.77  | 0.72  | 0.12  | 0.70  | -0.05 | 0.15  | 0.22  | 2.42  | 1.53  | 0.31 |
| INTZ      | 8644   | NM_002193   | 8644 | 0.39  | 0.14  | 0.03  | -0.09 | -0.36 | 0.03  | -0.09 | -0.36 | 0.03  | 0.22  | 0.66  | 0.31 |
| MBP52     | 51360  | NM_015884   | 8645 | -0.49 | -0.58 | -0.06 | -0.60 | -0.95 | -0.64 | -0.19 | 0.06  | 0.44  | -1.14 | -2.19 | 0.31 |
| RASA      | 5868   | NM_004162   | 8646 | 0.32  | 0.54  | 1.95  | 0.90  | 0.53  | 0.23  | -0.49 | -0.28 | 1.08  | 2.81  | 1.66  | 0.31 |
| INT2      | 1486   | NM_002078   | 8647 | 0.26  | 0.36  | -0.20 | 0.56  | 0.07  | 0.15  | -0.06 | 0.07  | 0.15  | 0.36  | -1.12 | 0.31 |
| KIA0274   | 9896   | NM_014845   | 8648 | 0.29  | 0.48  | 0.01  | 0.59  | -0.22 | 0.24  | 0.25  | 0.43  | -0.37 | 0.76  | 0.61  | 0.31 |
| ZNF1      | 9189   | NM_004729   | 8649 | 0.20  | -0.22 | 0.00  | -0.20 | -0.11 | -0.38 | 0.09  | 0.00  | 0.22  | -0.02 | -0.66 | 0.31 |
| TRF3      | 2987   | NM_000306   | 8650 | 0.00  | -0.40 | 0.46  | -0.42 | 0.40  | -0.42 | 0.40  | -0.42 | 0.40  | 0.60  | 1.41  | 0.31 |
| ITR       | 7276   | NM_000371   | 8651 | 0.16  | 0.55  | 0.45  | -0.47 | -0.13 | 0.09  | 0.43  | -0.57 | 0.46  | 0.05  | -0.52 | 0.31 |
| GCN5L2    | 2648   | NM_021078   | 8652 | 0.99  | 0.12  | 0.35  | 0.13  | 0.34  | 0.88  | 0.64  | 0.00  | -0.33 | 1.46  | 1.34  | 0.31 |
| DNZP7P104 | 15728  | NM_291277   | 8653 | 1.43  | 1.66  | 2.08  | 0.73  | 1.28  | 1.33  | -0.12 | 0.08  | 0.35  | 5.17  | 3.34  | 0.31 |
| LOC445    | 139    | NM_000095   | 8654 | 0.98  | 0.29  | 0.07  | 0.29  | 0.07  | 0.89  | -0.10 | 0.02  | 0.62  | 0.71  | 0.31  | 0.31 |
| PWIL4     | 143689 | NM_152431   | 8655 | -0.13 | 0.37  | -0.51 | -0.02 | 0.13  | -0.22 | -0.10 | 0.34  | 0.07  | -0.27 | -0.12 | 0.31 |
| LOC3928   | 63928  | NM_022997   | 8656 | -0.14 | -0.12 | -0.09 | -0.19 | -0.16 | -0.41 | -0.17 | 0.01  | 0.47  | -0.36 | -0.39 | 0.31 |
| IC45      | 54974  | NM_019772   | 8657 | 0.51  | 0.17  | 0.17  | 0.17  | 0.17  | 0.17  | 0.17  | 0.17  | 0.17  | 0.25  | 0.51  | 0.31 |
| MP22      | 4355   | NM_005374   | 8658 | 0.13  | -0.74 | 0.13  | -0.24 | 0.89  | 0.18  | 0.31  | -0.68 | 0.68  | -0.48 | 0.83  | 0.31 |
| MMP23B    | 8510   | NM_006983   | 8659 | -0.37 | -0.22 | -1.06 | -0.3  |       |       |       |       |       |       |       |      |

|             |        |              |      |       |       |       |       |       |       |       |       |       |       |       |      |
|-------------|--------|--------------|------|-------|-------|-------|-------|-------|-------|-------|-------|-------|-------|-------|------|
| F8002Z      | 26263  | NM_012170    | 8741 | 1.30  | 0.40  | 0.01  | 0.53  | 0.91  | 0.68  | 0.81  | -0.28 | 0.25  | 1.71  | 2.11  | 0.27 |
| F8004       | 3389   | NM_001141    | 8742 | -0.43 | -0.10 | 0.25  | -0.40 | 0.97  | -1.07 | -0.56 | -0.89 | 0.61  | -0.28 | -1.63 | 0.27 |
| FL40597     | 165631 | NM_152615    | 8743 | 1.43  | 0.68  | -0.35 | -0.56 | -1.08 | 0.01  | 1.06  | -0.36 | -0.43 | 0.40  | 1.63  | 0.27 |
| COX10       | 1352   | NM_001303    | 8744 | 0.68  | 1.96  | 0.69  | 0.80  | 1.40  | 0.26  | -0.33 | 0.29  | 0.31  | 3.33  | 2.45  | 0.27 |
| ZNF133      | 7692   | NM_00188390  | 8745 | 0.37  | -0.03 | 0.72  | 0.91  | 0.81  | 0.61  | -0.09 | -0.23 | 0.59  | 1.06  | 2.32  | 0.27 |
| FL13278     | 12862  | NM_144625    | 8746 | 0.28  | 0.65  | 0.85  | 0.76  | 0.65  | -0.39 | -0.02 | 0.65  | 0.35  | 1.23  | 1.25  | 0.27 |
| FL14815     | 400591 | NM_207454    | 8747 | 0.10  | 0.01  | 0.02  | 0.50  | 0.32  | -0.10 | -0.19 | -0.24 | 0.70  | 0.13  | 0.72  | 0.27 |
| NM1138      | 140432 | NM_178861    | 8748 | 7.11  | 7.54  | 20.99 | 7.85  | 12.59 | 9.78  | -0.20 | -0.62 | 1.09  | 36.64 | 30.22 | 0.27 |
| SDCCAG33    | 1014   | NM_033786    | 8749 | 0.06  | 0.06  | -0.17 | 0.67  | 0.67  | 0.67  | -0.19 | -0.62 | 0.67  | 0.66  | 0.76  | 0.27 |
| DD011P      | 506392 | NM_015722    | 8750 | 1.16  | 0.46  | 0.41  | 0.59  | 0.88  | 0.43  | 0.21  | 0.02  | 0.04  | 2.03  | 1.90  | 0.27 |
| PIPHF       | 5794   | NM_002842    | 8751 | -0.20 | -0.16 | 0.34  | -0.65 | -0.10 | 0.21  | 0.39  | -0.18 | 0.06  | -0.02 | -0.53 | 0.27 |
| TA022       | 18739  | NM_006860    | 8752 | -0.36 | 0.06  | -0.71 | -0.80 | -0.60 | -0.71 | -0.05 | -0.30 | 0.67  | -0.38 | -0.06 | 0.27 |
| LOC400720   | 400720 | NM_00102456  | 8753 | 1.21  | 0.89  | 1.50  | 1.01  | 1.57  | 1.38  | 0.19  | -0.10 | 0.18  | 3.60  | 3.97  | 0.27 |
| ZNF230      | 7773   | NM_006300    | 8754 | 0.00  | 0.37  | -0.51 | 0.00  | -0.26 | -0.30 | -0.25 | 0.04  | -0.42 | -0.14 | -0.56 | 0.26 |
| R511        | 6205   | NM_001015    | 8755 | -1.19 | -1.28 | -1.28 | -1.82 | -2.02 | -2.19 | -0.18 | 0.04  | 0.41  | -1.76 | -0.03 | 0.26 |
| TA9L        | 51616  | NM_015075    | 8756 | 1.09  | 0.10  | 0.64  | -0.60 | -0.04 | 0.24  | 0.82  | -0.16 | 0.25  | 1.83  | 0.42  | 0.26 |
| RAD21       | 5885   | NM_006265    | 8757 | -0.94 | -1.08 | -1.66 | -1.25 | -0.74 | -0.93 | 0.30  | 0.20  | -0.24 | -3.68 | -2.92 | 0.26 |
| EPH43       | 2042   | NM_182844    | 8758 | 0.25  | 0.66  | 0.52  | 0.07  | 0.17  | 0.74  | 0.01  | 0.21  | 0.04  | 1.43  | 0.98  | 0.26 |
| RM165       | 22826  | NM_014092    | 8759 | -0.08 | 0.65  | 1.63  | 4.55  | 2.98  | 3.07  | -0.57 | 0.52  | 0.71  | 2.41  | 10.60 | 0.26 |
| AP04A       | 337    | NM_000482    | 8760 | 0.95  | -0.22 | 1.18  | 0.02  | 0.30  | 0.47  | 0.31  | -0.54 | 0.49  | 1.91  | 0.79  | 0.26 |
| FAM408      | 57464  | NM_001134336 | 8761 | 0.21  | 1.13  | 0.45  | 0.76  | 0.51  | 0.24  | -0.43 | 0.08  | 0.61  | 1.78  | 1.50  | 0.26 |
| AMHGFS      | 7984   | NM_001002861 | 8762 | -0.39 | -0.80 | -0.53 | -1.29 | -1.33 | -0.66 | 0.13  | 0.00  | 0.13  | -1.72 | -3.28 | 0.26 |
| MRPL3       | 11222  | NM_007208    | 8763 | 2.43  | 0.91  | 0.93  | 1.17  | 1.71  | 0.97  | 0.25  | -0.08 | 0.09  | 4.28  | 3.85  | 0.26 |
| LOC390927   | 390927 | NM_001013659 | 8764 | -0.04 | -0.18 | 0.68  | -0.29 | -0.30 | -0.07 | -0.13 | -0.21 | 0.61  | 0.47  | -0.65 | 0.26 |
| RRR91       | 79708  | NM_024653    | 8765 | 0.87  | 1.19  | 0.30  | 0.73  | 0.13  | -0.01 | 0.16  | 0.22  | -0.12 | 2.36  | 0.85  | 0.26 |
| BT07        | 55272  | NM_018167    | 8766 | 0.33  | 0.18  | 0.05  | -0.03 | -0.49 | -0.31 | 0.40  | 0.10  | -0.25 | 0.56  | -0.86 | 0.26 |
| CY856102    | 110608 | NM_007022    | 8767 | 0.67  | 2.21  | 0.39  | 0.78  | 0.15  | -0.01 | -0.29 | 0.77  | 0.22  | 3.27  | 0.92  | 0.26 |
| ZNF577      | 84765  | NM_001135590 | 8768 | -0.27 | 0.11  | -0.31 | -0.20 | -0.99 | -0.76 | -0.31 | 0.65  | -0.06 | -0.47 | -1.96 | 0.26 |
| 5215        | 5215   | NM_138559    | 8769 | 0.43  | 0.67  | 0.59  | 0.67  | 0.67  | 0.67  | 0.67  | 0.67  | 0.67  | 1.69  | 1.39  | 0.26 |
| MG54441     | 148473 | NM_152499    | 8770 | -0.06 | -0.67 | -0.75 | -0.61 | -1.08 | -0.05 | 0.26  | 0.01  | -0.01 | -1.48 | -1.74 | 0.26 |
| FN413       | 3447   | NM_006900    | 8771 | 0.78  | 1.21  | 1.05  | 1.22  | 0.85  | 1.35  | 0.51  | -0.17 | -0.08 | 3.04  | 3.43  | 0.26 |
| MG21644     | 153389 | NM_0018486   | 8772 | -0.86 | -1.23 | -0.23 | -0.77 | -0.34 | -0.89 | 0.15  | -0.32 | 1.03  | -0.42 | -1.59 | 0.26 |
| COP         | 114769 | NM_001017534 | 8773 | 0.33  | 0.30  | -0.95 | -0.42 | -0.66 | -0.28 | -0.01 | 0.72  | -0.45 | 0.03  | 0.03  | 0.26 |
| CASQ1       | 84     | NM_001231    | 8774 | -0.31 | -0.43 | -0.41 | -0.59 | -0.44 | -0.61 | 0.09  | -0.28 | 0.45  | -1.15 | -1.64 | 0.26 |
| CUBN        | 8029   | NM_001381    | 8775 | 0.86  | 1.19  | 0.19  | 0.78  | 0.76  | 0.63  | -0.21 | 0.54  | -0.06 | 1.42  | 2.17  | 0.26 |
| NO2T        | 8529   | NM_006335    | 8776 | 0.11  | 1.02  | -0.64 | -0.28 | 0.58  | 0.42  | 0.19  | 0.02  | 0.42  | 1.74  | 1.29  | 0.26 |
| USH3A       | 7401   | NM_174880    | 8777 | 0.04  | -1.03 | -0.01 | -0.24 | -0.50 | -0.39 | 0.05  | -0.79 | 0.99  | -0.99 | -1.14 | 0.25 |
| Q4M447      | 402353 | NM_001005512 | 8778 | 0.04  | 1.19  | 0.19  | 0.78  | 0.76  | 0.63  | -0.21 | 0.54  | -0.06 | 1.42  | 2.17  | 0.25 |
| CS353       | 148481 | NM_017568    | 8779 | 0.12  | 0.22  | 0.02  | -0.42 | -0.19 | 0.02  | 0.19  | 0.02  | 0.42  | 0.66  | 0.71  | 0.25 |
| FAM20A      | 54757  | NM_017565    | 8780 | 0.00  | -0.06 | 0.61  | 0.08  | 0.09  | -0.65 | -0.39 | -0.40 | 1.53  | 0.55  | -0.49 | 0.25 |
| ADH18       | 125    | NM_000668    | 8781 | 1.13  | 0.29  | 0.91  | 0.83  | 1.24  | -0.09 | 0.00  | -0.27 | 0.53  | 2.34  | 1.98  | 0.25 |
| EL30R25     | 147339 | NM_001028239 | 8782 | -0.08 | -0.13 | 0.54  | -0.13 | -0.48 | 0.13  | 0.13  | 0.13  | 0.13  | 0.50  | -0.53 | 0.25 |
| C30R06      | 51575  | NM_016649    | 8783 | -0.47 | -0.61 | -1.17 | -1.28 | -1.08 | -1.00 | 0.72  | 0.02  | -0.40 | -2.25 | -3.36 | 0.25 |
| FL13910     | 64795  | NM_022780    | 8784 | -0.40 | -0.06 | -0.37 | -0.31 | 0.49  | -0.48 | 0.08  | -0.30 | 0.48  | -0.82 | -0.30 | 0.25 |
| FL08L3      | 9358   | NM_004791    | 8785 | -0.40 | -0.11 | 1.96  | -0.05 | 0.76  | 0.38  | -0.41 | -0.41 | 1.07  | 1.45  | 0.90  | 0.25 |
| FL40235     | 284849 | NM_173635    | 8786 | 0.47  | 0.14  | 0.01  | 0.49  | -0.77 | 0.66  | 0.02  | 0.06  | -0.82 | 0.62  | 0.63  | 0.25 |
| MG27121     | 408263 | NM_001001343 | 8787 | 0.93  | -0.09 | -0.18 | -0.77 | 0.68  | -0.46 | 0.00  | -0.13 | 0.38  | 1.02  | 0.98  | 0.25 |
| CP4A        | 51200  | NM_016352    | 8788 | 0.70  | -0.33 | 0.50  | -0.18 | 0.03  | 0.52  | 0.39  | -0.32 | 0.18  | 0.86  | 0.37  | 0.25 |
| ALCAH       | 14     | NM_001627    | 8789 | 0.68  | 0.68  | 0.68  | 0.68  | 0.68  | 0.68  | 0.68  | 0.68  | 0.68  | 0.68  | 0.68  | 0.25 |
| HTR3E       | 282342 | NM_182589    | 8790 | 0.01  | 0.05  | -0.07 | -0.44 | 0.01  | -0.08 | 0.30  | 0.39  | -0.44 | -0.01 | -0.51 | 0.25 |
| KMA1912     | 114800 | NM_001080433 | 8791 | 0.79  | 0.71  | 1.27  | 0.24  | -0.04 | 0.31  | 0.14  | 0.12  | -0.01 | 2.76  | 0.50  | 0.25 |
| LOC38031343 | 33866  | NM_0013143   | 8792 | 1.35  | 0.36  | 0.11  | 0.72  | 0.30  | 0.11  | 0.72  | 0.30  | 0.11  | 2.92  | 2.06  | 0.25 |
| COOR74      | 51020  | NM_016063    | 8793 | 0.63  | 0.53  | -0.59 | 0.10  | -0.68 | -0.49 | 0.07  | 0.55  | -0.37 | 0.57  | -0.07 | 0.25 |
| PH43        | 283208 | NM_182904    | 8794 | -0.30 | -0.67 | -0.18 | -0.50 | -0.26 | -0.89 | -0.18 | -0.53 | 0.96  | -1.14 | -1.66 | 0.25 |
| CG-90       | 51115  | NM_016033    | 8795 | -0.20 | 0.00  | 1.39  | 1.21  | 0.30  | -0.46 | -0.68 | -0.43 | 1.36  | 1.19  | 1.05  | 0.25 |
| AMH02       | 1192   | NM_152024    | 8796 | -0.13 | 0.24  | 0.04  | 0.11  | 0.62  | -0.09 | 0.63  | 0.65  | 0.08  | 0.08  | 0.16  | 0.25 |
| BZM1        | 9689   | NM_014670    | 8797 | 1.19  | 0.74  | 0.10  | 0.59  | 0.56  | -0.29 | 0.35  | 0.10  | -0.20 | 2.03  | 0.86  | 0.25 |
| DR400       | 79665  | NM_024612    | 8798 | 1.51  | 0.28  | 0.41  | 0.59  | 0.58  | -0.07 | 0.60  | 0.11  | -0.25 | 2.19  | 1.10  | 0.25 |
| PK0652      | 20389  | NM_001618    | 8799 | 0.69  | 0.78  | 0.52  | 1.4   | 0.34  | 0.69  | 0.18  | 0.52  | 1.74  | 1.24  | 1.24  | 0.25 |
| ZNF561      | 91334  | NM_152289    | 8800 | -0.04 | 0.54  | 0.21  | -0.42 | -0.11 | 0.19  | -0.18 | 0.29  | 0.13  | 0.70  | -0.35 | 0.24 |
| SPAT51      | 221409 | NM_145026    | 8801 | -0.30 | 0.24  | 1.64  | 0.66  | 1.19  | 0.48  | -0.45 | 0.11  | 0.58  | 1.59  | 2.33  | 0.24 |
| COOR73      | 6380   | NM_001031713 | 8802 | -0.09 | -0.05 | 0.21  | -0.40 | -0.10 | 0.37  | -0.40 | -0.10 | 0.37  | -0.40 | -0.10 | 0.24 |
| KJAA0895    | 23366  | NM_001100425 | 8803 | 0.56  | 0.14  | 0.64  | 0.00  | 0.04  | 0.57  | 0.62  | 0.23  | -0.14 | 1.34  | 0.62  | 0.24 |
| SR05A1      | 6715   | NM_001047    | 8804 | -0.79 | 1.14  | 1.35  | 1.00  | -0.22 | 0.52  | -0.96 | -0.68 | 0.52  | 1.70  | 1.30  | 0.24 |
| LOC84661    | 84661  | NM_025274    | 8805 | 0.37  | 0.51  | -0.28 | -0.14 | -0.52 | -1.07 | -0.33 | 0.21  | 0.35  | -0.14 | -1.73 | 0.24 |
| TC-FC       | 5441   | NM_170021    | 8806 | 0.67  | 0.30  | 0.17  | 0.60  | -0.17 | 0.00  | -0.17 | 0.00  | -0.17 | 0.60  | -0.17 | 0.24 |
| FL12439     | 65260  | NM_023077    | 8807 | 2.22  | 2.23  | 0.48  | 0.43  | 0.87  | 1.62  | 0.46  | 0.37  | -0.59 | 4.92  | 2.92  | 0.24 |
| STR413      | 201254 | NM_144998    | 8808 | -0.29 | -0.17 | 0.00  | -0.40 | -0.11 | 0.16  | 0.06  | 0.26  | -0.08 | -0.47 | 0.09  | 0.24 |
| FL0C4F      | 36530  | NM_173235    | 8809 | 0.40  | 0.71  | 0.43  | 0.40  | 0.14  | 0.42  | 0.14  | 0.42  | 0.14  | 1.54  | 1.22  | 0.24 |
| APFC5L      | 81873  | NM_030978    | 8810 | 0.78  | 1.81  | 0.38  | 0.86  | 0.80  | 0.12  | -0.21 | 0.50  | -0.05 | 2.97  | 1.79  | 0.24 |
| RTN1        | 6252   | NM_206852    | 8811 | 0.41  | -0.26 | 0.21  | -0.20 | -0.20 | 0.33  | 0.20  | -0.32 | 0.37  | 0.35  | -0.06 | 0.24 |
| LOC80972    | 11624  | NM_000675    | 8812 | 0.13  | 1.55  | 0.45  | 0.80  | 0.37  | 0.59  | 0.37  | 0.59  | 0.37  | 1.14  | 1.36  | 0.24 |
| CEN1        | 1968   | NM_004066    | 8813 | -0.18 | 0.07  | -0.68 | -1.23 | -1.39 | -0.93 | 0.06  | 0.57  | -0.39 | -0.53 | -1.55 | 0.24 |
| POU24F1     | 5450   | NM_006235    | 8814 | -0.76 | 0.60  | -0.38 | -0.88 | 0.08  | -0.32 | -0.42 | 0.82  | -0.17 | -0.55 | -1.22 | 0.24 |
| MP01A       | 4130   | NM_002173    | 8815 | 1.32  | -0.18 | -0.11 | 0.66  | 0.90  | 0.99  | 0.83  | -0.32 | -0.28 | 1.04  | 2.52  | 0.24 |
| PK0M13      | 56136  | NM_031865    | 8816 | 0.75  | 0.13  | 0.59  | 0.60  | -0.33 | -0.50 | -0.63 | 0.53  | -0.60 | -1.22 | -1.39 | 0.24 |
| GR125       | 166647 | NM_145290    | 8817 | -0.72 | -0.20 | 0.21  | -0.38 | -0.43 | 0.09  | -0.33 | 0.01  | 0.55  | -0.71 | -0.72 | 0.24 |
| DKZP5646142 | 84061  | NM_032121    | 8818 | 0.62  | 0.90  | 1.77  | 1.78  | 1.44  | 0.38  | -0.69 | -0.18 | 1.11  | 3.29  | 3.59  | 0.24 |
| FN1         | 2346   | NM_001059    | 8819 | 0.36  | -0.11 | 0.12  | 0.36  | 0.11  | 0.17  | 0.17  | 0.17  | 0.17  | 0.09  | 0.09  | 0.24 |
| COOR30      | 115416 | NM_138446    | 8820 | 0.06  | 0.00  | 0.15  | -0.09 | -0.73 | 0.61  | 0.05  | 0.33  |       |       |       |      |

|          |        |              |      |       |       |       |       |       |       |       |       |       |       |       |      |
|----------|--------|--------------|------|-------|-------|-------|-------|-------|-------|-------|-------|-------|-------|-------|------|
| LOC91937 | 91937  | NM_138379    | 8903 | -0.93 | -0.97 | -0.86 | -0.79 | -1.22 | -0.94 | 0.08  | -0.07 | 0.03  | -2.76 | -1.96 | 0.20 |
| HWK      | 25174  | NM_001840    | 8904 | 1.00  | 0.68  | 0.60  | 0.80  | 1.10  | 0.83  | 0.19  | -0.37 | 0.47  | 2.34  | 1.77  | 0.20 |
| FLU23560 | 79798  | NM_024685    | 8905 | 0.80  | -0.87 | 1.53  | 0.13  | 0.66  | 0.37  | 0.26  | -0.83 | 0.77  | 1.47  | 1.16  | 0.20 |
| UMS3     | 96626  | NM_033514    | 8906 | 2.01  | 1.37  | 0.39  | 1.14  | 0.85  | 1.63  | 0.41  | 0.33  | -0.53 | 3.77  | 3.62  | 0.20 |
| PGFG     | 80530  | NM_033135    | 8907 | -0.04 | 0.71  | -0.25 | 0.08  | -0.39 | -0.80 | -0.09 | 0.36  | -0.07 | 0.50  | -1.12 | 0.20 |
| NALP13   | 326204 | NM_030210    | 8908 | 0.07  | 0.53  | 0.17  | 0.07  | 0.17  | 0.20  | 0.17  | 0.20  | 0.53  | 0.86  | 2.14  | 0.20 |
| CEACAM3  | 1084   | NM_001815    | 8909 | -0.13 | -0.48 | 0.29  | -0.46 | -0.72 | -0.34 | 0.32  | -0.15 | 0.03  | -0.33 | -1.52 | 0.20 |
| RM40     | 9810   | NM_014771    | 8910 | 1.16  | 2.03  | 2.12  | 1.37  | 1.41  | 1.83  | -0.11 | 0.30  | 0.20  | 5.31  | 4.61  | 0.20 |
| L1R14    | 359    | NM_011612    | 8911 | -0.21 | 0.15  | 0.06  | -0.17 | 0.11  | 0.11  | 0.11  | 0.11  | 0.11  | 0.00  | 0.26  | 0.20 |
| GEORF197 | 55633  | NM_017772    | 8912 | 0.53  | 1.07  | 0.47  | 0.18  | 0.64  | 0.69  | 0.16  | 0.04  | -0.01 | 1.90  | 1.51  | 0.20 |
| KMA11720 | 80851  | NM_030645    | 8913 | -0.27 | -0.59 | 0.52  | 0.06  | -0.47 | -0.35 | -0.52 | -0.32 | 1.04  | -0.33 | -0.75 | 0.20 |
| TP338929 | 7359   | NM_03101885  | 8914 | 2.00  | 2.06  | 0.63  | 0.60  | 1.16  | 0.85  | 1.16  | 0.85  | 1.16  | 2.47  | 2.08  | 0.20 |
| AMELX    | 965    | NM_182681    | 8915 | 0.29  | 0.42  | 0.71  | 0.22  | 0.04  | 0.12  | 0.03  | 0.18  | -0.01 | 1.42  | 0.38  | 0.20 |
| TM001    | 7111   | NM_003275    | 8916 | -0.08 | 0.37  | -0.79 | -0.32 | 0.69  | 0.23  | 0.44  | 0.46  | 0.70  | -0.50 | 0.59  | 0.20 |
| FLM425   | 39436  | NM_198493    | 8917 | -0.71 | 0.04  | 0.08  | -0.45 | -0.42 | 0.07  | -0.41 | 0.32  | 0.29  | -0.59 | -0.80 | 0.20 |
| ZDA      | 778    | NM_007156    | 8918 | 0.90  | 0.97  | 0.47  | -0.48 | 0.41  | 0.77  | 0.24  | 0.24  | -0.29 | 2.34  | 0.69  | 0.19 |
| POK1L    | 149420 | NM_152835    | 8919 | -0.12 | -0.33 | -0.01 | -0.88 | 0.10  | -0.68 | 0.16  | -0.19 | 0.22  | -0.45 | -1.37 | 0.19 |
| FLU10458 | 54475  | NM_018096    | 8920 | -1.26 | -0.38 | 1.04  | 0.62  | 1.40  | 0.28  | -0.86 | -0.17 | 1.22  | -0.59 | 2.29  | 0.19 |
| AC037    | 414140 | NM_00103984  | 8921 | -0.95 | -0.49 | -1.16 | -1.37 | -1.06 | -1.44 | -0.13 | -0.18 | 0.51  | -2.63 | 3.86  | 0.19 |
| ZNF42    | 7593   | NM_003422    | 8922 | -0.13 | -0.29 | -0.32 | 1.61  | 0.18  | 1.41  | 0.29  | 0.50  | -0.60 | -0.74 | 3.20  | 0.19 |
| EDNRB    | 19510  | NM_003991    | 8923 | 0.16  | 0.31  | -0.17 | -0.67 | -0.43 | -0.27 | 0.18  | 0.21  | -0.20 | 0.30  | -1.37 | 0.19 |
| UMQ846   | 231920 | NM_207316    | 8924 | -0.33 | 0.00  | -0.52 | -0.55 | -0.63 | -0.50 | 0.06  | 0.33  | -0.20 | -0.84 | -1.67 | 0.19 |
| LMNB2    | 84823  | NM_032737    | 8925 | 0.12  | 0.36  | -0.22 | -0.46 | -0.58 | -0.84 | 0.37  | -0.03 | -0.15 | 0.27  | 1.88  | 0.19 |
| BP1L2    | 254240 | NM_174932    | 8926 | 0.82  | 0.16  | -0.10 | 0.06  | 0.46  | 0.05  | 0.48  | -0.28 | -0.01 | 0.88  | 0.57  | 0.19 |
| L15      | 3600   | NM_000585    | 8927 | 1.18  | 0.70  | 0.24  | 0.50  | 0.17  | -0.19 | 0.06  | 0.08  | 0.05  | 2.12  | 0.48  | 0.19 |
| OC245    | 39306  | NM_012365    | 8928 | 0.42  | 0.41  | 0.04  | 0.01  | 0.01  | 0.11  | 0.22  | 0.38  | 0.41  | 0.88  | 0.15  | 0.19 |
| OR2L8    | 391190 | NM_001001963 | 8929 | 0.54  | 0.33  | 2.20  | 0.66  | 2.14  | 2.10  | -0.13 | -0.13 | 0.45  | 3.07  | 4.90  | 0.19 |
| FLU32743 | 220136 | NM_145020    | 8930 | -0.19 | -0.02 | 1.17  | -0.06 | 0.17  | 0.56  | -0.38 | -0.12 | 0.69  | 0.96  | 0.68  | 0.19 |
| FORL1    | 230    | NM_005250    | 8931 | 0.45  | 0.82  | 0.42  | 0.41  | 0.95  | 0.42  | 0.95  | 0.42  | 0.95  | 0.58  | 2.38  | 0.19 |
| RF38     | 152006 | NM_194331    | 8932 | 0.84  | -0.84 | -0.39 | -0.17 | -0.16 | -1.00 | 0.29  | -0.41 | 0.30  | -0.39 | -1.33 | 0.19 |
| AMP32C   | 23520  | NM_012403    | 8933 | -0.72 | 0.19  | 0.63  | 1.39  | 1.97  | -0.52 | -0.71 | -0.56 | 1.45  | 0.10  | 2.84  | 0.19 |
| FLG524   | 84169  | NM_010383    | 8934 | 0.12  | 1.73  | 0.59  | 0.11  | 1.73  | -0.20 | 0.11  | 1.55  | -0.20 | 2.44  | 4.98  | 0.19 |
| H49      | 342945 | NM_181846    | 8935 | -0.79 | -0.75 | -1.00 | -0.33 | -0.89 | -1.06 | -0.14 | 0.44  | -0.11 | -0.24 | -2.29 | 0.19 |
| FLU14525 | 84886  | NM_032800    | 8936 | 0.30  | 0.62  | -0.53 | 0.21  | 0.59  | 0.32  | -0.01 | 0.40  | -0.20 | 0.39  | 1.11  | 0.19 |
| RUFY1    | 80230  | NM_025158    | 8937 | 0.24  | -0.33 | -0.15 | 0.17  | -0.54 | 0.23  | 0.12  | 0.05  | 0.02  | -0.23 | -0.24 | 0.19 |
| FANCE    | 2189   | NM_000429    | 8938 | 1.37  | 0.71  | 1.41  | 0.61  | 1.19  | 0.06  | 0.19  | 0.06  | 0.49  | 0.74  | 1.71  | 0.19 |
| OPFN     | 10133  | NM_021980    | 8939 | -0.04 | -0.17 | -0.18 | -0.25 | -0.71 | -0.47 | 0.01  | 0.19  | -0.01 | -0.40 | -1.39 | 0.19 |
| TARDBP   | 23435  | NM_007735    | 8940 | 0.35  | 1.03  | 0.62  | 0.93  | 1.15  | 1.92  | -0.06 | 0.26  | -0.01 | 2.00  | 4.05  | 0.19 |
| TCN      | 496    | NM_019657    | 8941 | -0.82 | 0.14  | 0.01  | -0.88 | 0.17  | -0.88 | -0.02 | 0.02  | 0.02  | 1.80  | 2.45  | 0.19 |
| P2P      | 5858   | NM_002864    | 8942 | 3.45  | 0.40  | -0.27 | 1.46  | 1.58  | -0.20 | 1.25  | -0.69 | -0.38 | 3.58  | 2.84  | 0.19 |
| PKHARIA  | 5573   | NM_002734    | 8943 | 2.00  | 0.02  | -0.40 | -1.00 | -0.43 | 0.30  | 0.27  | 0.16  | -0.24 | -0.18 | -0.24 | 0.19 |
| HA3D3    | 84127  | NM_001819    | 8944 | 0.24  | 0.14  | 0.48  | 0.19  | 0.24  | 0.19  | 0.24  | 0.19  | 0.24  | 3.51  | 1.62  | 0.19 |
| NNAT     | 4826   | NM_181689    | 8945 | 0.41  | -0.82 | -0.70 | -1.01 | -1.42 | -1.16 | 0.13  | 0.15  | -0.09 | -1.59 | -1.59 | 0.19 |
| FLU31810 | 158038 | NM_152570    | 8946 | 0.94  | -0.81 | -0.01 | -0.27 | -0.02 | 0.18  | 0.60  | -0.54 | 0.13  | 0.12  | -0.11 | 0.19 |
| SUC1A1   | 1317   | NM_001899    | 8947 | 0.31  | 0.25  | 0.73  | -0.13 | 0.23  | -0.15 | -0.09 | -0.06 | 0.16  | 1.28  | -0.24 | 0.19 |
| HITWY    | 5586   | NM_018480    | 8948 | 0.05  | 0.23  | 0.35  | 0.26  | 0.28  | 0.24  | -0.13 | 0.23  | 0.63  | 0.63  | 0.88  | 0.19 |
| LOC51066 | 51066  | NM_015931    | 8949 | 0.11  | 0.27  | 0.26  | -0.19 | -0.45 | -0.26 | -0.21 | -0.07 | 0.47  | 0.64  | 0.00  | 0.19 |
| PPR1     | 5540   | NM_005972    | 8950 | -0.02 | 0.25  | -0.32 | -0.14 | -0.34 | -0.53 | -0.33 | 0.30  | 0.21  | -0.09 | -1.00 | 0.19 |
| NOMIS1   | 63977  | NM_021215    | 8951 | 0.40  | 0.03  | 0.03  | -0.05 | -0.07 | -0.15 | -0.02 | 0.17  | -0.05 | 0.18  | 0.44  | 0.19 |
| C11ORF5  | 741    | NM_014205    | 8952 | -0.95 | -0.76 | -0.75 | -0.79 | -1.17 | -1.17 | -1.17 | -1.17 | 0.35  | -2.46 | -1.13 | 0.18 |
| DNAH6    | 10049  | NM_005494    | 8953 | -0.28 | -0.16 | -0.24 | 0.08  | -0.78 | -0.70 | -0.02 | 0.30  | -0.09 | -0.12 | -1.39 | 0.18 |
| ZFR90    | 14649  | NM_001468    | 8954 | -0.23 | 0.45  | -0.26 | 0.26  | 0.59  | -0.59 | -0.59 | -0.59 | -0.59 | -0.59 | -0.59 | 0.18 |
| GLRXL    | 16148  | NM_00112388  | 8955 | -0.42 | -0.49 | 0.28  | 0.36  | 0.31  | 0.81  | -0.16 | -0.13 | 0.47  | 0.63  | 1.48  | 0.18 |
| CEACAM8  | 1088   | NM_001816    | 8956 | -0.16 | 0.21  | 0.19  | 0.07  | 0.16  | 0.37  | -0.46 | 0.25  | 0.39  | 0.24  | 0.60  | 0.18 |
| CUTC     | 51076  | NM_015960    | 8957 | -0.22 | 0.01  | -0.65 | -0.47 | 0.06  | 0.29  | 0.07  | 0.65  | -0.53 | -0.87 | -1.12 | 0.18 |
| PHAZ2    | 11230  | NM_007213    | 8958 | -1.02 | 1.05  | 0.91  | -0.49 | -1.25 | -0.42 | -0.25 | -0.42 | -0.25 | -0.50 | -4.55 | 0.18 |
| FLU2148  | 79918  | NM_024860    | 8959 | 1.43  | 0.98  | 0.80  | 0.02  | 1.09  | 0.41  | 0.34  | -0.15 | 0.00  | 3.22  | 1.51  | 0.18 |
| NRP58    | 3633   | NM_005540    | 8960 | 1.24  | 0.62  | 1.20  | 1.56  | 2.06  | 1.54  | 0.14  | -0.32 | 0.36  | 3.05  | 5.16  | 0.18 |
| POPO3    | 6426   | NM_022661    | 8961 | 0.75  | 0.19  | 0.60  | 0.13  | 0.66  | 0.28  | 0.13  | 0.66  | 0.28  | 0.86  | 0.19  | 0.18 |
| CHUK     | 1147   | NM_001278    | 8962 | 1.07  | 0.24  | -0.45 | -0.25 | 0.09  | 0.48  | 0.68  | -0.03 | -0.47 | 0.86  | 0.32  | 0.18 |
| MU1      | 4291   | NM_022443    | 8963 | -1.14 | -0.96 | -0.66 | -1.58 | -1.39 | -1.12 | 0.07  | -0.20 | -0.08 | -2.75 | -4.09 | 0.18 |
| NMES     | 8385   | NM_023551    | 8964 | 1.14  | 0.64  | 0.68  | 0.67  | 0.88  | 0.27  | 0.13  | -0.07 | 0.27  | 2.36  | 1.37  | 0.18 |
| MIR16    | 51573  | NM_016641    | 8965 | 1.03  | 0.88  | 0.35  | 0.68  | 1.29  | 1.24  | 0.03  | -0.08 | 0.22  | 3.21  | 3.21  | 0.18 |
| SIDS     | 126789 | NM_153339    | 8966 | 1.79  | 3.62  | 2.58  | 2.57  | 2.99  | 2.61  | -0.06 | 0.33  | -0.09 | 7.58  | 8.17  | 0.18 |
| SIDS     | 51319  | NM_016388    | 8967 | 0.44  | 0.31  | 0.08  | 0.28  | 0.35  | -0.37 | 0.43  | -0.16 | -0.09 | 0.81  | 0.27  | 0.18 |
| FLU2884  | 149486 | NM_144702    | 8968 | 0.15  | 0.45  | 0.19  | 0.06  | 0.05  | 0.05  | 0.06  | 0.12  | 0.06  | 0.49  | 0.80  | 0.18 |
| TBXA2R   | 6915   | NM_001260    | 8969 | 0.04  | -0.39 | 0.08  | -0.26 | -0.72 | 0.15  | 0.08  | -0.13 | 0.23  | -0.27 | -0.83 | 0.18 |
| NM32C    | 4306   | NM_000901    | 8970 | 0.39  | -0.61 | 0.36  | -0.18 | 0.14  | 0.15  | 0.32  | -0.56 | 0.41  | 0.15  | 0.11  | 0.18 |
| SOX1     | 6650   | NM_005632    | 8971 | 0.48  | 0.82  | 1.07  | 0.48  | 0.82  | 1.15  | 0.48  | 0.82  | 1.15  | 1.23  | 0.95  | 0.18 |
| OSBP     | 5007   | NM_002556    | 8972 | 0.92  | 0.65  | 0.92  | 0.48  | 0.91  | 0.61  | 0.17  | -0.08 | 0.09  | 1.89  | 2.00  | 0.18 |
| RMF35    | 84282  | NM_197939    | 8973 | 0.55  | -0.04 | 0.48  | 0.40  | 0.42  | 0.36  | 0.17  | -0.38 | 0.38  | 1.00  | 1.18  | 0.18 |
| NM570    | 148438 | NM_002684    | 8974 | 0.14  | -0.03 | 0.08  | 0.17  | 0.66  | 0.10  | 0.66  | 0.10  | 0.66  | 0.86  | 1.08  | 0.18 |
| KLXK     | 11202  | NM_144507    | 8975 | 1.77  | -0.27 | -0.05 | -1.51 | -0.22 | -0.02 | -0.28 | -0.09 | 0.55  | -1.09 | -1.34 | 0.18 |
| GLA      | 2717   | NM_000116    | 8976 | 0.67  | 0.31  | 0.76  | -0.01 | 0.45  | 0.99  | 0.26  | -0.06 | -0.03 | 1.75  | 1.42  | 0.18 |
| XC10     | 4283   | NM_002418    | 8977 | 0.07  | -0.19 | 0.74  | -0.58 | -0.98 | -0.70 | -0.26 | -0.02 | 0.46  | 0.62  | -2.27 | 0.17 |
| LOC10647 | 55134  | NM_018166    | 8978 | 0.07  | 0.06  | 0.01  | 0.13  | 0.16  | 0.13  | 0.16  | 0.13  | 0.16  | 0.13  | 0.22  | 0.17 |
| GAL3ST1  | 9514   | NM_004861    | 8979 | -0.09 | -0.19 | 0.24  | -0.12 | -0.23 | -0.24 | 0.05  | -0.36 | 0.49  | -0.03 | -0.58 | 0.17 |
| APB3     | 9546   | NM_004886    | 8980 | -0.18 | 0.09  | 0.12  | 0.55  | -0.08 | 0.70  | -0.48 | 0.80  | -0.14 | 0.02  | 1.17  | 0.17 |
| FLU3725  | 52292  | NM_021544    | 8981 | 0.74  | 0.91  | 1.84  | 0.74  | 0.91  | 1.84  | 0.74  | 0.91  | 1.84  | 3.50  | 3.70  | 0.17 |
| NM502    | 55850  | NM_018467    | 8982 | -0.42 | -0.31 | 0.27  | 0.21  | -0.08 | 0.72  | -0.20 | -0.11 | 0.26  | -0.46 | -0.85 | 0.17 |
| PUN1A1   | 5361   | NM_032242    | 8983 | -0.96 | -0.06 | 0.14  | -1.   |       |       |       |       |       |       |       |      |



|           |        |              |      |       |       |       |       |       |       |       |       |       |       |       |      |
|-----------|--------|--------------|------|-------|-------|-------|-------|-------|-------|-------|-------|-------|-------|-------|------|
| VEGF      | 7422   | NM_01025370  | 9065 | -0.12 | 0.64  | 0.19  | -0.53 | 0.01  | 0.93  | 0.11  | 0.29  | -0.26 | 0.71  | 0.42  | 0.14 |
| CE13A2    | 8958   | NM_01025370  | 9066 | 0.14  | 1.32  | 0.30  | -0.80 | 1.71  | 0.39  | 0.17  | 0.23  | -0.26 | 2.06  | 2.54  | 0.24 |
| FAM154A   | 8392   | NM_023026    | 9067 | 0.43  | 1.87  | 0.68  | 1.00  | 1.20  | 0.01  | -0.88 | 0.40  | 0.63  | 2.11  | 2.21  | 0.14 |
| CSORF121  | 158046 | NM_145283    | 9068 | 0.99  | 0.55  | 1.09  | 1.35  | 0.85  | 0.44  | -0.03 | -0.09 | 0.27  | 2.63  | 2.64  | 0.14 |
| NDUP58    | 4728   | NM_020496    | 9069 | -0.81 | -0.35 | -0.51 | -0.60 | 0.01  | -0.39 | -0.45 | 0.51  | 0.08  | -1.77 | -0.98 | 0.14 |
| SL2       | 8414   | NM_175077    | 9070 | 0.07  | 0.24  | 1.49  | 0.40  | 0.52  | 0.46  | 0.70  | 0.20  | 0.28  | 0.28  | 0.24  | 0.14 |
| MAPK315   | 38940  | NM_01001671  | 9071 | -0.55 | 0.48  | 0.59  | 0.92  | 0.36  | 1.10  | -0.72 | 0.58  | 0.28  | 0.51  | 2.38  | 0.14 |
| GCSH      | 2653   | NM_004483    | 9072 | 0.26  | 1.16  | -0.16 | 0.39  | 0.39  | -0.01 | 0.13  | 0.14  | -0.14 | 0.06  | 0.77  | 0.14 |
| FHAB      | 3445   | NM_021070    | 9073 | 0.06  | 0.19  | 0.42  | 0.16  | 0.19  | 0.28  | 0.29  | 0.18  | 0.28  | 0.68  | 1.61  | 0.14 |
| ING4      | 51147  | NM_016162    | 9074 | 2.41  | 1.44  | 0.96  | 1.65  | 1.59  | 1.18  | 0.38  | -0.06 | -0.18 | 4.81  | 4.42  | 0.14 |
| ARH04B    | 51742  | NM_031171    | 9075 | -0.24 | 0.00  | -0.02 | -0.64 | -0.41 | -0.47 | 0.00  | 0.16  | -0.03 | -0.25 | -1.52 | 0.14 |
| NMPL3     | 432    | NM_010247    | 9076 | -0.11 | 1.50  | 0.19  | -0.13 | 0.59  | 1.56  | 0.19  | 0.19  | 0.19  | 1.59  | 4.10  | 0.14 |
| UNC5B     | 219699 | NM_170744    | 9077 | 0.70  | -0.48 | 0.09  | -1.02 | -0.83 | -0.21 | -0.01 | -0.06 | 0.21  | -1.08 | -0.07 | 0.14 |
| CSORF74   | 81605  | NM_030914    | 9078 | -0.51 | -0.56 | -0.47 | -0.84 | -0.25 | -0.44 | -0.01 | -0.51 | 0.65  | -1.54 | -1.53 | 0.14 |
| STAP2     | 261729 | NM_152999    | 9079 | 0.43  | 0.03  | 0.49  | 0.02  | 0.28  | 0.21  | 0.12  | -0.18 | 0.20  | 0.86  | 0.51  | 0.14 |
| EP17      | 85345  | NM_178455    | 9080 | 0.68  | 0.53  | 0.59  | 2.09  | 0.30  | 0.67  | 0.08  | 0.37  | 0.21  | 1.80  | 3.06  | 0.14 |
| PF04A     | 5203   | NM_020623    | 9081 | 0.35  | 0.81  | -0.06 | 0.32  | 0.22  | 0.33  | 0.00  | 0.27  | -0.14 | 1.09  | 0.86  | 0.13 |
| DCR11     | 10231  | NM_055822    | 9082 | 0.87  | 0.21  | 0.31  | 0.46  | 0.78  | 0.38  | 0.27  | -0.44 | 0.31  | 1.39  | 1.61  | 0.13 |
| WIC       | 5122   | NM_100486    | 9083 | -0.68 | -0.28 | -0.48 | 0.61  | -1.15 | -1.25 | -0.59 | 0.26  | 0.46  | -1.44 | 1.78  | 0.13 |
| CTSO      | 1519   | NM_001334    | 9084 | 0.23  | -0.15 | 0.00  | 0.03  | -0.79 | -0.83 | -0.24 | -0.01 | 0.38  | 0.09  | -1.59 | 0.13 |
| RP40      | 10799  | NM_006638    | 9085 | 0.10  | 0.92  | 0.26  | 0.53  | 1.05  | 0.48  | -0.07 | 0.54  | -0.34 | 1.28  | 2.06  | 0.13 |
| PF03      | 5795   | NM_020222    | 9086 | 0.50  | 0.37  | 0.30  | -0.31 | 0.39  | 0.28  | 0.26  | -0.08 | -0.05 | 1.17  | 0.26  | 0.13 |
| ZDHHC4    | 55146  | NM_018106    | 9087 | -0.29 | -0.21 | 0.13  | -0.38 | -0.36 | -0.27 | -0.36 | 0.17  | 0.33  | 0.05  | 1.00  | 0.13 |
| CKAP4     | 10970  | NM_006825    | 9088 | 0.13  | -0.63 | -0.32 | -0.33 | -0.55 | -0.10 | 0.40  | -0.39 | 0.13  | -0.82 | -0.98 | 0.13 |
| SDPR      | 8436   | NM_004457    | 9089 | 0.24  | -0.10 | -0.33 | -0.44 | 0.15  | -0.09 | 0.17  | 0.30  | -0.31 | -0.19 | -0.35 | 0.13 |
| DOCK      | 1654   | NM_020405    | 9090 | -0.76 | -0.02 | 0.06  | 0.24  | 0.11  | -0.42 | -0.63 | -0.25 | 1.01  | -0.72 | -0.06 | 0.13 |
| SLC33A1   | 9197   | NM_004733    | 9091 | -0.53 | -0.38 | 0.51  | 0.04  | 0.18  | -0.42 | -0.43 | 0.14  | 0.42  | -0.40 | -0.20 | 0.13 |
| PRKCB1    | 23613  | NM_183048    | 9092 | -0.85 | -0.14 | 0.00  | -0.06 | 0.36  | 0.46  | 0.58  | -0.18 | -0.27 | 0.70  | 0.77  | 0.13 |
| DCS2      | 14350  | NM_0005570   | 9093 | 0.65  | 0.19  | 0.47  | -0.08 | 0.13  | 0.14  | -0.13 | 0.14  | 0.14  | 2.56  | 1.53  | 0.13 |
| FLJ2184   | 80164  | NM_00171923  | 9094 | 0.19  | -0.22 | -0.59 | -0.27 | -0.23 | -0.85 | 0.20  | -0.03 | -0.04 | -1.00 | -1.36 | 0.13 |
| IL1R1     | 9173   | NM_016232    | 9095 | -0.30 | 0.13  | -0.50 | -0.48 | -0.42 | -0.86 | -0.16 | -0.04 | 0.33  | -0.67 | -1.76 | 0.13 |
| TR2       | 7819   | NM_004614    | 9096 | -0.22 | 0.01  | 0.14  | -0.39 | -0.66 | -0.95 | -0.37 | -0.10 | -0.28 | -0.08 | -1.23 | 0.13 |
| OR2B6     | 29512  | NM_012367    | 9097 | 1.34  | 0.08  | 1.70  | 0.96  | 0.15  | 1.44  | 0.13  | -0.32 | 0.32  | 2.95  | 2.55  | 0.13 |
| FAF1      | 85403  | NM_033083    | 9098 | 0.10  | 0.00  | -0.06 | -0.88 | -0.43 | -0.05 | 0.35  | 0.16  | -0.38 | 0.04  | -1.36 | 0.13 |
| TRAPP3    | 126003 | NM_001942462 | 9099 | -0.55 | 0.15  | -0.56 | -0.49 | -0.04 | -0.70 | -0.01 | 0.10  | 0.03  | -0.96 | -1.23 | 0.13 |
| ZNF76     | 7929   | NM_030427    | 9100 | 0.38  | 0.01  | 0.86  | 0.24  | 0.11  | -0.24 | -0.02 | -0.66 | 0.17  | 1.23  | 0.07  | 0.13 |
| FST       | 10468  | NM_013409    | 9101 | 0.57  | -0.25 | -0.05 | -0.47 | -0.01 | -0.03 | 0.18  | -0.19 | 0.13  | 0.27  | -0.51 | 0.13 |
| ZFSCAN14  | 95681  | NM_018178    | 9102 | -0.05 | 0.04  | 0.12  | 0.27  | 1.41  | 0.45  | 1.05  | -0.54 | -0.38 | 0.11  | 2.13  | 0.13 |
| PHF18     | 6678   | NM_030118    | 9103 | 1.85  | 0.55  | 1.68  | 0.70  | 0.77  | 0.86  | 0.67  | 0.42  | 0.67  | 3.08  | 2.23  | 0.13 |
| PRKCM     | 5587   | NM_002742    | 9104 | 0.29  | -0.09 | 0.67  | 0.44  | 0.01  | 0.00  | -0.41 | 0.02  | 0.51  | 0.87  | 0.43  | 0.13 |
| MCART6    | 401612 | NM_00102755  | 9105 | 1.36  | 0.25  | 1.19  | 0.47  | 0.18  | 0.85  | 0.07  | 0.00  | 0.06  | 2.80  | 1.51  | 0.13 |
| ZNF126    | 5791   | NM_030322    | 9106 | -0.26 | -0.09 | 0.67  | -0.16 | -0.09 | 0.60  | 0.11  | -0.11 | 0.26  | 0.45  | 0.21  | 0.13 |
| ZNF512    | 84450  | NM_032434    | 9107 | 0.74  | -0.52 | 0.73  | -0.42 | 0.48  | -0.02 | 0.72  | -0.91 | 0.32  | 0.95  | 0.04  | 0.13 |
| MC2R      | 4158   | NM_000529    | 9108 | -0.35 | -0.73 | -0.64 | -0.93 | -0.46 | -0.20 | 0.78  | -0.31 | -0.35 | -1.73 | -1.59 | 0.13 |
| MAPAP1    | 5386   | NM_021127    | 9109 | -0.30 | -0.05 | 0.89  | 0.76  | 0.25  | 0.21  | -0.13 | -0.20 | 0.46  | 0.54  | 1.22  | 0.13 |
| FBXO3C    | 9582   | NM_000400    | 9110 | 0.85  | 0.75  | 0.45  | -0.73 | -0.29 | -0.17 | -0.43 | -0.26 | 0.46  | 0.25  | 0.27  | 0.13 |
| FBXO25    | 26260  | NM_012173    | 9111 | -0.55 | 0.14  | 0.85  | -0.51 | -0.21 | -0.15 | -0.43 | -0.02 | 0.57  | 0.43  | -0.88 | 0.12 |
| CCR2      | 1231   | NM_000648    | 9112 | 1.47  | 0.48  | 1.09  | 0.61  | 0.01  | 0.56  | 0.10  | -0.12 | 0.14  | 3.09  | 1.18  | 0.12 |
| HSD17SBTA | 55556  | NM_018112    | 9113 | 0.27  | 0.04  | 0.48  | -0.63 | -0.63 | -0.63 | -0.46 | -0.46 | 0.28  | 0.07  | 0.17  | 0.12 |
| GNAS1     | 2769   | NM_002068    | 9114 | -0.38 | -0.22 | -0.02 | -0.02 | -0.76 | -0.66 | -0.36 | 0.14  | 0.34  | -0.62 | -1.45 | 0.12 |
| MTMR9     | 66936  | NM_015458    | 9115 | 1.28  | 2.16  | 0.00  | 1.48  | 0.75  | 0.15  | -0.32 | 0.74  | -0.30 | 3.44  | 2.38  | 0.12 |
| ZNF126    | 5721   | NM_021022895 | 9116 | 0.41  | 0.41  | 0.61  | 0.16  | 0.07  | 0.21  | 0.19  | 0.21  | 0.21  | 0.18  | 0.09  | 0.12 |
| UPF3A     | 65110  | NM_080687    | 9117 | -1.09 | 0.83  | 0.45  | 2.42  | 1.09  | 1.38  | -0.88 | 1.14  | 0.04  | -1.19 | 4.88  | 0.12 |
| CLVL      | 171425 | NM_206808    | 9118 | -0.70 | -0.52 | -0.56 | -1.21 | -1.00 | -1.12 | -0.01 | -0.03 | 0.17  | -1.78 | -3.32 | 0.12 |
| MGCS555   | 304033 | NM_178655    | 9119 | -0.60 | -0.75 | -0.52 | -0.58 | -0.77 | -0.69 | -0.09 | 0.01  | 0.21  | -1.86 | -2.01 | 0.12 |
| GLM       | 4090   | NM_002345    | 9120 | 0.43  | 0.02  | 0.30  | 0.40  | 0.36  | 0.30  | 0.40  | 0.36  | 0.30  | 3.11  | 0.62  | 0.12 |
| GARPA     | 2551   | NM_002040    | 9121 | 1.26  | 0.85  | 1.19  | 1.28  | 1.10  | 0.83  | 0.01  | -0.03 | 0.16  | 3.20  | 3.21  | 0.12 |
| MLL4      | 9757   | NM_014727    | 9122 | 6.11  | 6.71  | 12.62 | 10.73 | 3.19  | 3.95  | 0.19  | 0.06  | -0.14 | 25.45 | 23.27 | 0.12 |
| HA2       | 1943   | NM_000405    | 9123 | 0.04  | 0.40  | 0.40  | 0.12  | 0.09  | -0.12 | 0.09  | -0.12 | 0.09  | 0.23  | 0.42  | 0.12 |
| SNNA1     | 8636   | NM_003731    | 9124 | 0.61  | 0.93  | 0.18  | -0.50 | 0.47  | -0.49 | 0.19  | -0.16 | 0.09  | 1.73  | 0.52  | 0.12 |
| STX10     | 8677   | NM_003765    | 9125 | 0.07  | -0.38 | 0.28  | 0.11  | 0.34  | -0.13 | -0.06 | -0.44 | 0.61  | -0.03 | 0.32  | 0.12 |
| CS3       | 23787  | NM_178656    | 9126 | 0.65  | -0.75 | -0.39 | -0.73 | -0.51 | -0.73 | -0.19 | -0.30 | -0.12 | -0.44 | -0.42 | 0.12 |
| ITFC      | 122016 | NM_198310    | 9127 | 0.58  | 0.74  | -0.17 | -0.39 | 0.11  | -0.58 | 0.57  | -0.71 | 0.23  | 0.34  | 0.86  | 0.12 |
| DAP3      | 7818   | NM_004632    | 9128 | -0.60 | -0.83 | -0.70 | -0.44 | -0.39 | -0.65 | 0.09  | 0.08  | -0.05 | -2.13 | -1.48 | 0.12 |
| SPPL1     | 768239 | NM_00186382  | 9129 | -0.68 | -0.72 | -0.85 | -1.66 | -1.57 | -1.70 | 0.29  | -0.18 | 0.01  | -2.23 | -4.93 | 0.12 |
| ZNF630    | 5729   | NM_00037193  | 9130 | 0.46  | 1.60  | 1.50  | 0.27  | 0.40  | 1.47  | -0.46 | 0.42  | 0.67  | 0.42  | 0.56  | 0.12 |
| DELFG     | 26297  | NM_012139    | 9131 | -0.38 | -0.17 | 0.76  | 0.11  | 0.96  | -0.23 | -0.34 | -0.46 | 0.92  | 0.21  | 0.84  | 0.12 |
| SMURF2    | 64750  | NM_022739    | 9132 | -0.26 | -0.24 | 0.23  | 0.25  | -0.36 | -0.45 | -0.32 | -0.03 | 0.47  | -0.27 | -0.57 | 0.12 |
| EP1       | 171    | NM_003725    | 9133 | 0.61  | 1.13  | 0.34  | 0.34  | -0.43 | 0.17  | -0.34 | -0.43 | 0.17  | 0.34  | 0.84  | 0.12 |
| MYO6      | 127294 | NM_152372    | 9134 | -0.61 | -0.44 | -0.44 | -0.56 | -1.01 | -1.18 | -0.22 | 0.22  | 0.11  | -1.48 | -2.74 | 0.11 |
| LOC255374 | 255374 | NM_203397    | 9135 | 0.84  | 0.18  | -0.55 | -0.01 | 0.18  | -0.17 | 0.39  | 0.26  | -0.53 | 0.48  | 0.00  | 0.11 |
| FLJ20094  | 5481   | NM_000425    | 9136 | -1.21 | -1.22 | -1.13 | -1.38 | -1.21 | -1.13 | -1.38 | -1.21 | -1.13 | -1.38 | -1.21 | 0.11 |
| WNT7A     | 7476   | NM_004625    | 9137 | 0.77  | 0.10  | -0.30 | 0.63  | -0.19 | 0.29  | 0.19  | 0.03  | -0.11 | 0.71  | 0.74  | 0.11 |
| GUK1      | 2987   | NM_000558    | 9138 | -0.69 | -0.65 | -0.74 | -1.61 | -1.00 | -1.49 | 0.21  | -0.31 | 0.21  | -2.09 | -4.11 | 0.11 |
| PS        | 2153   | NM_000130    | 9139 | 0.87  | 1.05  | 0.95  | -0.05 | 0.88  | 0.78  | -0.11 | 0.09  | -0.09 | 2.87  | 1.41  | 0.11 |
| ABRD3     | 5765   | NM_000801    | 9140 | 0.87  | 1.57  | 1.31  | 0.63  | 0.37  | 0.64  | 0.37  | 0.64  | 0.37  | 2.54  | 0.84  | 0.11 |
| PCDH1A    | 56147  | NM_031410    | 9141 | 0.66  | -0.20 | 0.02  | 0.42  | 0.65  | 0.58  | 0.23  | -0.25 | 0.13  | 0.48  | 1.65  | 0.11 |
| PCDH3     | 56145  | NM_031409    | 9142 | 0.94  | 1.06  | -0.20 | -0.40 | -0.06 | 0.38  | 0.27  | 0.39  | -0.54 | 1.80  | -1.11 | 0.11 |
| OR2B1     | 8413   | NM_000469    | 9143 | 0.81  | 1.09  | 0.99  | -0.12 | 1.19  | 0.89  | -0.52 | 0.19  | 0.19  | 2.10  | 0.81  | 0.11 |
| CSORF16   | 84226  | NM_032266    | 9144 | 0.10  | 0.13  | 0.38  | -0.46 | -0.15 | -0.38 | -0.16 | 0.12  | 0.15  | 0.61  | 0.98  | 0.11 |
| CASR      | 946    | NM_000388    | 9145 | -0.26 | 1.41  | -0.89 | 0.59  | 0.82  |       |       |       |       |       |       |      |

|           |        |              |      |       |       |       |       |       |       |       |       |       |       |       |      |
|-----------|--------|--------------|------|-------|-------|-------|-------|-------|-------|-------|-------|-------|-------|-------|------|
| FLU2920   | 80221  | NM_025149    | 9227 | -0.09 | 0.20  | 0.15  | -0.19 | -0.13 | 0.25  | -0.01 | 0.00  | 0.00  | 0.26  | -0.07 | 0.07 |
| BHRB22    | 612    | NM_025163    | 9228 | 0.55  | 1.05  | 0.07  | 0.20  | 0.15  | 0.04  | 0.00  | 0.00  | 0.00  | 1.77  | 0.64  | 0.07 |
| TS6A2     | 89765  | NM_080860    | 9229 | 0.58  | 0.49  | -0.13 | -1.23 | -1.37 | -0.83 | 0.45  | -0.23 | -0.14 | -0.05 | -1.43 | 0.07 |
| CARRS1    | 23889  | NM_014316    | 9230 | 0.08  | 1.02  | 0.18  | 0.83  | 0.36  | 0.40  | -0.69 | 0.49  | 0.27  | 1.29  | 1.59  | 0.07 |
| QSL       | 8658   | NM_198213    | 9231 | 0.42  | -0.22 | -0.20 | 0.26  | -0.73 | 0.09  | 0.04  | 0.33  | -0.30 | 0.00  | -0.42 | 0.07 |
| GARR21    | 236    | NM_198213    | 9232 | 1.96  | 1.36  | 1.31  | 0.31  | 1.77  | 0.77  | 0.31  | -0.35 | 0.17  | 4.57  | 3.87  | 0.07 |
| NU076     | 11162  | NM_198041    | 9233 | 0.09  | 0.69  | -0.32 | -0.38 | -0.14 | -0.29 | -0.28 | 0.43  | -0.08 | 0.46  | -0.81 | 0.07 |
| DOX50     | 79009  | NM_020405    | 9234 | -0.94 | -0.65 | -0.55 | -0.78 | -0.39 | -0.09 | -0.29 | -0.27 | 0.61  | -2.14 | -1.26 | 0.07 |
| TOR03     | 81550  | NM_020794    | 9235 | 0.44  | 0.18  | -0.19 | 0.31  | 0.64  | 0.87  | -0.47 | 0.33  | -0.17 | 0.17  | 1.09  | 0.07 |
| TOP2A     | 7153   | NM_001067    | 9236 | -0.14 | 0.18  | -0.19 | 0.93  | 2.14  | 0.41  | 0.31  | -0.34 | 0.11  | -0.15 | 3.49  | 0.07 |
| STL10     | 6793   | NM_005990    | 9237 | -0.19 | -0.15 | -0.83 | -0.16 | 0.28  | 0.33  | 0.68  | 0.03  | -0.63 | -1.17 | 0.45  | 0.07 |
| AGTR2     | 448    | NM_020866    | 9238 | -0.11 | 0.20  | 0.10  | -0.40 | 0.15  | 0.00  | 0.37  | 0.00  | 0.00  | 0.14  | 0.38  | 0.07 |
| KLHL1     | 57626  | NM_020866    | 9239 | 0.63  | 0.79  | -0.70 | 0.01  | 0.07  | 0.01  | 0.58  | 0.21  | -0.72 | -0.86 | 0.05  | 0.07 |
| EZH2      | 2146   | NM_152998    | 9240 | -0.44 | -0.19 | -0.47 | 0.04  | 0.22  | -0.84 | -0.19 | -0.35 | 0.61  | -1.10 | -0.58 | 0.07 |
| FLU1506   | 79719  | NM_020466    | 9241 | -0.30 | -0.08 | 0.71  | 0.11  | -0.06 | -0.15 | -0.25 | -0.35 | 0.67  | 0.34  | -0.11 | 0.07 |
| ELR1      | 3354   | NM_000977    | 9242 | 0.25  | 0.06  | 1.09  | 1.00  | 0.39  | 0.00  | -0.47 | -0.38 | 0.93  | 1.41  | 1.47  | 0.07 |
| PPFBP1    | 8496   | NM_177444    | 9243 | 0.01  | -0.06 | 0.15  | -0.62 | -0.34 | -0.71 | -0.20 | -0.03 | 0.30  | 0.10  | -1.66 | 0.07 |
| COORF19   | 25382  | NM_00101876  | 9244 | 1.20  | -0.30 | 0.01  | 0.56  | 0.31  | 0.35  | 0.57  | -0.37 | -0.14 | 0.91  | 1.22  | 0.07 |
| FLU0859   | 6476   | NM_020274    | 9245 | -0.29 | -0.03 | 0.10  | -0.48 | -0.28 | -0.20 | -0.15 | -0.05 | 0.27  | -0.22 | 0.96  | 0.07 |
| IRFS      | 3663   | NM_032643    | 9246 | -0.93 | -0.88 | -0.78 | -2.15 | -1.26 | -1.78 | -0.02 | -0.20 | 0.29  | -2.59 | -5.19 | 0.07 |
| NOM03     | 408950 | NM_00104067  | 9247 | 0.14  | 0.44  | 0.50  | 0.45  | 0.00  | -0.30 | -0.37 | 0.35  | 0.09  | 1.08  | 0.16  | 0.07 |
| BST1      | 145173 | NM_194318    | 9248 | 0.07  | -0.86 | -0.05 | -0.41 | -0.73 | -0.72 | 0.55  | -0.38 | -0.03 | -1.45 | -1.86 | 0.07 |
| MANBAL    | 63905  | NM_00100389  | 9249 | 0.93  | 0.33  | -0.73 | -0.97 | -0.78 | -1.15 | -0.49 | 0.18  | 0.38  | 1.99  | 2.91  | 0.07 |
| LOC156913 | 196913 | NM_001014830 | 9250 | 1.18  | 0.44  | -0.05 | -0.14 | 0.04  | -0.28 | 0.20  | -0.08 | -0.05 | 1.57  | -0.38 | 0.07 |
| DNASE2    | 1777   | NM_001375    | 9251 | -0.35 | -0.34 | -0.07 | -0.71 | -0.21 | -0.64 | 0.08  | -0.31 | 0.30  | -0.76 | -1.56 | 0.07 |
| COP21     | 22818  | NM_020607    | 9252 | -0.83 | -1.77 | -1.51 | -1.98 | -2.75 | -2.96 | -0.19 | -0.35 | 0.60  | -4.02 | -7.69 | 0.07 |
| FLU2791   | 222521 | NM_173559    | 9253 | 2.69  | 1.87  | 1.25  | 1.77  | 1.85  | 2.91  | 0.50  | 0.10  | -0.53 | 5.81  | 6.54  | 0.07 |
| FBP2      | 8789   | NM_003837    | 9254 | -0.56 | -0.29 | -0.62 | -0.69 | -1.52 | -0.88 | -0.25 | 0.41  | -0.09 | -1.47 | -3.09 | 0.07 |
| 144215    | 144215 | NM_020866    | 9255 | 0.97  | 0.50  | 0.84  | 0.31  | 0.22  | 0.11  | 0.02  | 0.11  | 0.11  | 1.31  | 0.91  | 0.07 |
| KIAA1543  | 57662  | NM_020902    | 9256 | -0.46 | -0.54 | -0.03 | -0.69 | 0.28  | -0.41 | 0.21  | -0.69 | 0.55  | -1.24 | -0.81 | 0.07 |
| CMO1      | 9391   | NM_004084    | 9257 | 2.18  | 0.73  | 1.03  | 2.34  | 1.15  | 1.40  | 0.20  | -0.14 | 0.00  | 3.94  | 4.89  | 0.07 |
| AKO2      | 425    | NM_020164    | 9258 | 0.24  | 0.20  | 0.09  | -0.16 | -0.27 | 0.40  | 0.58  | -0.10 | 0.00  | 0.63  | 0.58  | 0.07 |
| SNR1B     | 6641   | NM_020101    | 9259 | 0.07  | -0.02 | 0.15  | -0.02 | 0.14  | -0.32 | -0.29 | -0.10 | 0.46  | -0.16 | -0.20 | 0.06 |
| EFS       | 10278  | NM_032459    | 9260 | -1.35 | -1.28 | -1.40 | -2.73 | -2.48 | -1.34 | -0.19 | 0.65  | -0.40 | -0.43 | -6.54 | 0.06 |
| SUC10A    | 207780 | NM_152979    | 9261 | 0.46  | 0.29  | 0.22  | 0.36  | 0.10  | 0.22  | 0.12  | 0.08  | -0.14 | 0.97  | 0.68  | 0.06 |
| CTPMV2    | 28540  | NM_020282    | 9262 | 0.86  | 0.83  | 0.10  | 0.67  | 1.45  | 0.26  | 0.77  | 0.62  | 0.24  | 0.83  | 0.60  | 0.06 |
| RAPSN     | 5913   | NM_032645    | 9263 | -0.59 | -1.04 | -0.99 | -0.80 | -1.24 | -0.68 | 0.97  | -0.66 | -0.26 | -2.62 | -2.73 | 0.06 |
| MG46265   | 342926 | NM_182009    | 9264 | -0.33 | -0.48 | 0.26  | -0.18 | -0.49 | -0.09 | 0.03  | -0.07 | 0.10  | -0.55 | -0.76 | 0.06 |
| FNAL      | 51477  | NM_018668    | 9265 | 0.82  | 0.22  | 1.12  | 0.68  | 1.10  | 0.28  | 0.15  | 0.28  | 0.24  | 0.14  | 1.12  | 0.06 |
| PDH8B     | 56128  | NM_019120    | 9266 | -0.13 | 0.53  | 0.55  | -0.52 | -0.19 | 0.47  | 0.00  | 0.09  | -0.03 | 0.95  | -0.24 | 0.06 |
| FLU0979   | 55275  | NM_018289    | 9267 | -0.49 | -0.29 | -0.26 | -0.40 | -0.41 | -0.14 | -0.09 | 0.09  | 0.07  | -1.05 | -0.15 | 0.06 |
| HRD21     | 58829  | NM_020345    | 9268 | -0.76 | 0.31  | 0.40  | -0.13 | 0.46  | -0.35 | 0.21  | 0.40  | 0.00  | 0.41  | 1.09  | 0.06 |
| ISRS      | 6755   | NM_001053    | 9269 | 0.71  | -0.80 | -0.96 | -0.63 | -1.79 | -0.73 | -0.05 | -0.14 | 0.24  | -2.46 | -3.15 | 0.06 |
| NALP9     | 338321 | NM_176820    | 9270 | 1.11  | 0.51  | 1.19  | 0.44  | 0.27  | 0.91  | 0.39  | -0.10 | -0.23 | 2.91  | 1.63  | 0.06 |
| SPR2      | 6731   | NM_182092    | 9271 | 0.35  | 1.84  | 0.99  | 1.04  | 1.53  | 0.50  | -0.54 | 0.31  | 0.29  | 3.19  | 3.08  | 0.06 |
| SPR5      | 382    | NM_001063    | 9272 | 0.35  | 0.11  | 0.91  | 0.35  | 0.11  | 0.86  | 0.12  | 0.06  | 0.11  | 1.61  | 1.96  | 0.06 |
| CORT      | 1325   | NM_001302    | 9273 | 0.03  | 0.25  | 1.39  | 1.00  | 0.53  | 0.80  | -0.13 | 0.07  | 0.11  | 1.66  | 2.34  | 0.06 |
| STK31     | 56166  | NM_031414    | 9274 | -0.11 | -0.16 | -0.18 | -0.33 | -0.42 | -0.77 | -0.05 | 0.03  | 0.06  | -0.45 | -1.52 | 0.06 |
| 11079     | 11079  | 000703       | 9275 | 0.05  | 0.78  | 0.25  | 0.15  | 2.12  | 2.41  | 0.15  | 0.22  | 0.24  | 0.17  | 7.60  | 0.06 |
| ATP4B     | 496    | NM_000705    | 9276 | -0.64 | -0.26 | -0.59 | -0.27 | -0.11 | -0.45 | -0.37 | 0.78  | -0.36 | -1.49 | -0.83 | 0.06 |
| TCERG1    | 10915  | NM_000706    | 9277 | 0.32  | 0.78  | 1.80  | 0.29  | -0.03 | 0.99  | -0.25 | 0.26  | 0.05  | 2.90  | 1.25  | 0.06 |
| 17HDK     | 5144   | NM_020328    | 9278 | -1.12 | 0.39  | -0.04 | -0.54 | -0.58 | -0.28 | 0.37  | 0.00  | 0.00  | 2.01  | 2.65  | 0.05 |
| TRM15     | 89870  | NM_052812    | 9279 | 1.12  | 0.02  | 1.10  | 1.86  | 2.65  | 1.89  | -0.23 | 0.32  | 0.60  | 1.60  | 6.39  | 0.05 |
| KLHL3     | 90293  | NM_033495    | 9280 | -0.23 | 0.16  | -0.13 | -0.18 | 0.36  | -0.42 | -0.20 | -0.33 | 0.58  | -0.19 | -0.24 | 0.05 |
| ELZEV     | 55298  | NM_001001482 | 9281 | 0.42  | 0.47  | 1.11  | 0.73  | 1.62  | 1.08  | 0.11  | -0.26 | 0.20  | 2.00  | 3.44  | 0.05 |
| 140881    | 22893  | NM_018204    | 9282 | 0.00  | -0.16 | -0.13 | -0.13 | -0.18 | -0.49 | -0.21 | 0.00  | 0.00  | 0.02  | 0.35  | 0.05 |
| 19HR2     | 54826  | NM_017811    | 9283 | 0.07  | -0.63 | -0.43 | 0.12  | -0.20 | -0.72 | 0.10  | -0.16 | 0.12  | -1.00 | -0.79 | 0.05 |
| TRFR1     | 55809  | NM_033501    | 9284 | 1.78  | 2.30  | 0.31  | 1.23  | 1.52  | 1.18  | 0.37  | 0.25  | -0.57 | 4.39  | 3.93  | 0.05 |
| 10465     | 10465  | 000375       | 9285 | 0.13  | 0.15  | 0.00  | 0.15  | 0.19  | 0.09  | 0.02  | 0.02  | 0.00  | 0.93  | 1.73  | 0.05 |
| CASP8     | 841    | NM_033358    | 9286 | -0.30 | -0.36 | 0.68  | 1.05  | 0.95  | -0.68 | -0.68 | -0.66 | 1.39  | 0.20  | 1.31  | 0.05 |
| PHGDH     | 26227  | NM_006623    | 9287 | 0.55  | 0.70  | 0.21  | 1.14  | 1.20  | 0.98  | 0.04  | 0.00  | 0.01  | 1.46  | 3.31  | 0.05 |
| 5ARL2     | 4590   | NM_005506    | 9288 | -0.42 | 0.06  | -0.40 | -0.40 | 0.16  | -0.40 | 0.00  | 1.43  | 0.00  | -0.92 | -0.73 | 0.05 |
| OLFM2A    | 169511 | NM_182487    | 9289 | 2.57  | 1.61  | 1.18  | 1.53  | 2.22  | 3.50  | 0.48  | 0.05  | -0.48 | 4.36  | 7.25  | 0.05 |
| RF3       | 5991   | NM_134428    | 9290 | -0.16 | 0.28  | -0.55 | 1.81  | 1.13  | 0.16  | 0.15  | 0.21  | -0.30 | -0.44 | 3.10  | 0.05 |
| HLF       | 22088  | NM_182547    | 9291 | -0.70 | 0.16  | 0.05  | -0.28 | 0.28  | -0.92 | -0.65 | -0.10 | 0.80  | -0.49 | -0.93 | 0.05 |
| 50CB      | 509    | NM_000032    | 9292 | 0.85  | 0.75  | 0.96  | 0.67  | 0.75  | 0.67  | 0.07  | 0.26  | 0.75  | 2.56  | 1.58  | 0.05 |
| UBE2I     | 7329   | NM_194260    | 9293 | 0.33  | -0.42 | -0.26 | 0.36  | 1.63  | 1.84  | 0.46  | -0.24 | -0.17 | -0.35 | 3.83  | 0.05 |
| LOC152831 | 152831 | NM_175737    | 9294 | -2.68 | 0.26  | -0.20 | 0.95  | 0.97  | -1.63 | -0.78 | -0.50 | 1.32  | -0.62 | 0.28  | 0.05 |
| 147409    | 147409 | NM_001001041 | 9295 | -0.19 | -0.41 | 0.15  | 0.51  | 0.41  | 0.55  | -0.42 | 0.11  | 0.00  | 0.75  | 0.69  | 0.05 |
| ZNF433    | 163099 | NM_001080411 | 9296 | 2.35  | 2.58  | 0.50  | 1.75  | 0.88  | 1.22  | 0.11  | 0.50  | -0.56 | 5.42  | 3.85  | 0.05 |
| STH       | 246744 | NM_001070332 | 9297 | -1.03 | -0.97 | -0.49 | 0.30  | -1.10 | -0.15 | -0.77 | -0.07 | 0.89  | -2.49 | -0.96 | 0.05 |
| 9317      | 9317   | 000652       | 9298 | 0.56  | -0.18 | 0.69  | 0.29  | -0.19 | -0.09 | -0.26 | -0.15 | 0.09  | 0.01  | -0.26 | 0.05 |
| SRGAP2    | 23380  | NM_015126    | 9299 | 0.16  | 1.41  | 0.95  | 0.47  | 0.28  | 0.26  | -0.11 | 0.32  | 0.03  | 2.12  | 1.00  | 0.05 |
| IFH1      | 3697   | NM_002215    | 9300 | 0.01  | 1.76  | 0.37  | 1.18  | 1.15  | 0.18  | -0.58 | 0.34  | 0.28  | 2.14  | 2.50  | 0.05 |
| LOC380630 | 380630 | NM_204856    | 9301 | -0.57 | -0.51 | -0.70 | -0.84 | -0.23 | -0.62 | 0.56  | -0.51 | 0.00  | -1.77 | -1.89 | 0.04 |
| TNFRSF5L  | 84957  | NM_020122    | 9302 | 0.37  | 0.09  | -0.39 | 0.31  | 0.22  | 0.70  | 0.12  | -0.02 | 0.10  | 0.81  | 2.19  | 0.04 |
| GRRA      | 64996  | NM_022139    | 9303 | -0.79 | -1.06 | -1.51 | -1.59 | -1.51 | -0.20 | 0.93  | -0.01 | -0.88 | -3.36 | -3.30 | 0.04 |
| OKT2      | 64664  | NM_022120    | 9304 | -0.20 | 0.38  | -0.07 | -0.42 | -0.59 | 0.55  | -0.27 | 0.67  | -0.36 | 0.11  | -0.47 | 0.04 |
| 23162     | 23162  | NM_020758    | 9305 | 1.54  | 1.06  | 0.66  | 1.54  | 1.06  | 0.66  | 0.18  | 0.18  | 0.11  | 1.81  | 1.74  | 0.04 |
| MG10993   | 107156 | NM_001105599 | 9306 | 0.55  | 1.58  | 0.01  | 0.52  | -0.04 | 0.22  | 0.20  | 0.31  | -0.47 | 2.14  | 0.71  | 0.04 |
| RA5A4     | 10156  | NM_006989    | 9307 | 1.26  |       |       |       |       |       |       |       |       |       |       |      |

|             |        |              |      |       |       |       |       |       |       |       |       |       |       |       |       |
|-------------|--------|--------------|------|-------|-------|-------|-------|-------|-------|-------|-------|-------|-------|-------|-------|
| LARC11      | 10314  | NM_006055    | 9389 | -0.71 | 0.13  | -0.53 | -0.70 | -0.47 | -0.68 | -0.13 | 0.17  | -0.03 | -1.11 | -1.85 | 0.01  |
| TMPSF513    | 8480   | NM_021046    | 9390 | -0.48 | 0.10  | 0.47  | -0.32 | -0.49 | -0.77 | -0.24 | 0.34  | 0.08  | -0.77 | -0.88 | 0.01  |
| ZBED2       | 79413  | NM_024508    | 9391 | 1.61  | 0.61  | 1.52  | 1.77  | 2.46  | 0.96  | 0.24  | -0.66 | 0.43  | 3.75  | 5.19  | 0.01  |
| FBWV2       | 26190  | NM_012164    | 9392 | 1.17  | 0.46  | 0.96  | 1.05  | 1.15  | 1.08  | -0.02 | -0.24 | 0.26  | 2.59  | 3.27  | 0.01  |
| CALEK       | 799    | NM_001742    | 9393 | 0.14  | -0.14 | 0.25  | 0.13  | -0.30 | 0.20  | -0.07 | -0.03 | 0.10  | 0.25  | 0.03  | 0.01  |
| MF2         | 329    | NM_024020    | 9394 | 0.38  | 0.05  | 0.38  | 1.38  | 0.05  | 0.36  | 0.60  | -0.07 | 0.46  | 1.46  | 2.31  | 0.01  |
| SHOX        | 6473   | NM_006883    | 9395 | 2.20  | -0.11 | -0.30 | 0.53  | 1.70  | 0.64  | 0.97  | -0.50 | -0.47 | 1.78  | 2.87  | 0.01  |
| PKAMEF7     | 441871 | NM_00102277  | 9396 | 0.66  | 1.90  | 1.45  | 0.51  | 1.00  | 0.16  | -0.23 | 0.01  | 0.23  | 4.01  | 1.67  | 0.01  |
| SGC50959    | 25403  | NM_03138664  | 9397 | 0.11  | 0.80  | 0.19  | 0.10  | 0.40  | -0.10 | 0.69  | -0.10 | 1.11  | 1.11  | 1.70  | 0.01  |
| SNRP        | 56889  | NM_020123    | 9398 | 1.61  | 0.30  | 0.20  | 0.69  | 0.12  | 0.38  | 0.58  | -0.42 | -0.15 | 2.11  | 1.19  | 0.01  |
| LOC5908     | 5908   | NM_018687    | 9399 | 0.25  | 3.10  | -0.29 | 1.46  | 1.19  | 1.00  | -0.57 | 1.19  | -0.62 | 8.06  | 3.64  | 0.01  |
| ITDSS2      | 8149   | NM_020783    | 9400 | -0.08 | -0.39 | 0.35  | -0.40 | -0.28 | 0.69  | -0.23 | -0.49 | -0.35 | -0.82 | -0.55 | 0.01  |
| CC9L11      | 128699 | NM_080476    | 9401 | 0.27  | 0.13  | -0.17 | 0.03  | -0.48 | -0.05 | -0.38 | 0.36  | 0.03  | 0.68  | 0.50  | 0.01  |
| SI          | 6476   | NM_001041    | 9402 | 0.86  | 0.46  | 1.67  | 0.60  | 1.33  | 0.31  | -0.02 | -0.47 | 0.49  | 3.00  | 2.24  | 0.01  |
| AT8         | 285973 | NM_173881    | 9403 | -0.68 | -1.08 | -0.13 | -0.89 | -0.94 | -1.03 | -0.23 | -0.67 | 0.91  | -1.88 | -2.86 | 0.01  |
| SGAC3       | 124512 | NM_173987    | 9404 | 0.94  | -0.35 | 0.16  | -0.90 | -0.98 | -0.07 | -0.29 | -0.07 | 0.37  | -1.12 | -2.55 | 0.01  |
| PWDMF       | 57728  | NM_025132    | 9405 | 0.21  | 0.79  | 0.38  | 0.49  | 1.57  | 0.21  | -0.12 | -0.25 | 0.38  | 1.39  | 2.27  | 0.00  |
| GF          | 2694   | NM_005142    | 9406 | -0.22 | 0.96  | 0.00  | -0.12 | 0.35  | 0.66  | -0.05 | 0.58  | -0.52 | 0.73  | 0.88  | 0.00  |
| ORCC5       | 402382 | NM_001005518 | 9407 | 1.11  | 1.45  | 0.05  | 0.68  | 0.42  | -0.21 | -0.15 | 0.16  | 0.00  | 2.61  | 0.89  | 0.00  |
| RAB27B      | 5874   | NM_004163    | 9408 | 0.11  | 0.71  | 0.42  | 0.32  | 0.52  | 0.30  | 0.19  | -0.04 | -0.15 | 1.24  | 1.14  | 0.00  |
| LOC112869   | 112869 | NM_138414    | 9409 | 1.55  | 1.43  | 1.24  | 0.66  | 1.07  | 0.29  | 0.14  | -0.11 | -0.02 | 4.22  | 2.03  | 0.00  |
| WHSCL       | 7468   | NM_007331    | 9410 | 0.26  | -0.03 | 0.60  | 0.03  | 0.28  | 0.25  | -0.07 | -0.38 | 0.43  | 0.82  | 0.56  | 0.00  |
| NM75F1      | 7107   | NM_003272    | 9411 | 0.10  | 0.04  | 0.00  | 0.32  | 0.13  | 0.34  | -0.23 | 0.27  | -0.04 | 0.06  | 0.80  | 0.00  |
| TNFR5F13C   | 115650 | NM_052945    | 9412 | -0.40 | -0.03 | 0.87  | -0.05 | 1.28  | 0.62  | -0.05 | -0.18 | 0.23  | 0.44  | 1.85  | 0.00  |
| INPL        | 149428 | NM_138279    | 9413 | 1.28  | 0.93  | 1.16  | 1.28  | 1.32  | 1.17  | -0.05 | 0.13  | -0.06 | 3.38  | 3.78  | 0.00  |
| MA1A04      | 84451  | NM_020495    | 9414 | 0.23  | 0.04  | 0.81  | 1.61  | -0.30 | 0.10  | -0.70 | 0.23  | 0.47  | 1.08  | 1.41  | 0.00  |
| FLU1046     | 55773  | NM_018309    | 9415 | -0.67 | -0.32 | -0.08 | -0.99 | -0.75 | -0.32 | -0.11 | -0.12 | 0.23  | -1.07 | -2.07 | 0.00  |
| FKP7        | 51661  | NM_181342    | 9416 | -0.82 | 0.14  | -0.02 | 0.19  | -1.00 | 0.43  | -0.62 | 0.49  | 0.13  | -0.70 | -1.25 | 0.00  |
| CCWCL1      | 22817  | NM_020941    | 9417 | -0.10 | -0.23 | 0.87  | -0.11 | 0.23  | 0.87  | -0.11 | 0.23  | 0.87  | 0.54  | 0.37  | 0.00  |
| CHST8       | 64377  | NM_022467    | 9418 | 0.30  | 0.74  | 1.33  | 1.47  | 1.21  | 2.29  | -0.17 | 0.25  | -0.08 | 2.37  | 4.98  | 0.00  |
| LOC39598    | 390598 | NM_001031807 | 9419 | -0.65 | 0.08  | -0.84 | -0.63 | -0.43 | -0.58 | -0.44 | 0.79  | -0.35 | -1.40 | -1.64 | 0.00  |
| FLU2886     | 5686   | NM_020783    | 9420 | 0.13  | 0.15  | -0.58 | -0.20 | -0.21 | 0.20  | -0.33 | -0.41 | -0.30 | -0.80 | -0.07 | 0.00  |
| STVK1       | 55399  | NM_018423    | 9421 | 1.11  | 0.41  | -0.31 | -0.18 | -0.28 | -0.38 | -0.74 | 0.51  | 0.23  | 1.83  | 0.83  | 0.00  |
| ADAMT5      | 11173  | NM_014272    | 9422 | 0.47  | 0.30  | 0.23  | -0.88 | 0.09  | 1.25  | 0.01  | 0.31  | -0.32 | 1.01  | 2.23  | 0.00  |
| PHACTH3     | 116154 | NM_183246    | 9423 | 0.17  | -0.20 | 0.05  | -0.23 | -0.33 | -0.20 | 0.25  | -0.17 | -0.08 | 0.02  | -0.75 | 0.00  |
| PDAC78      | 55304  | NM_018327    | 9424 | 0.19  | 0.14  | 0.85  | 0.38  | 0.65  | 0.80  | 0.00  | 0.00  | 0.38  | 0.80  | 1.14  | 0.00  |
| MLF2        | 8079   | NM_005439    | 9425 | 0.83  | -0.14 | -0.16 | 0.41  | -0.37 | 0.35  | 0.10  | 0.29  | -0.39 | 0.53  | 0.39  | 0.00  |
| PLD3C1      | 57125  | NM_020405    | 9426 | 1.35  | 0.37  | -0.05 | 1.61  | 0.83  | 0.16  | 0.47  | -0.25 | -0.22 | 1.68  | 2.60  | 0.00  |
| TP84        | 238    | NM_010214    | 9427 | 0.30  | 0.22  | 0.22  | 0.18  | -0.17 | -0.29 | -0.10 | -0.17 | -0.08 | 0.03  | 0.08  | 0.00  |
| LOC286148   | 286148 | NM_181787    | 9428 | -0.16 | -0.58 | -0.48 | 0.36  | -1.03 | -0.31 | -0.30 | 0.37  | -0.08 | -1.22 | -0.97 | 0.00  |
| MAPK12      | 6300   | NM_002969    | 9429 | 0.13  | 0.74  | 0.05  | 0.48  | 1.03  | 0.37  | 0.17  | 0.08  | -0.26 | 0.93  | 1.88  | 0.00  |
| RANGRF      | 2989   | NM_001492    | 9430 | -0.45 | -0.08 | -0.43 | -0.64 | -0.22 | -0.40 | -0.12 | 0.22  | -0.40 | -0.48 | -1.08 | 0.00  |
| RPL3        | 6122   | NM_00103853  | 9431 | 0.96  | 1.86  | -1.80 | -2.13 | -2.67 | -2.70 | 0.96  | -0.75 | -0.21 | 4.62  | 7.50  | 0.00  |
| NTN1        | 9423   | NM_004822    | 9432 | -0.29 | -0.29 | -0.30 | -0.84 | -0.46 | -0.85 | 0.22  | -0.21 | -0.02 | -0.88 | -1.25 | 0.00  |
| KLR18       | 3820   | NM_002258    | 9433 | 0.24  | 1.03  | 0.74  | 0.45  | 0.11  | 0.57  | -0.29 | 0.19  | 0.09  | 2.00  | 1.13  | 0.00  |
| LOC006413   | 112817 | NM_138413    | 9434 | 0.62  | 0.13  | 0.17  | 0.42  | 0.17  | 0.32  | 0.58  | -0.21 | 0.37  | 0.86  | 1.95  | 0.00  |
| TUBB1       | 81027  | NM_030773    | 9435 | 0.64  | -0.08 | 0.20  | 0.06  | 0.32  | 0.21  | 0.00  | -0.52 | 0.51  | 2.63  | 0.59  | -0.01 |
| NC2         | 4688   | NM_000433    | 9436 | 0.68  | -0.80 | -0.54 | -0.56 | -0.68 | 0.07  | 0.96  | -0.59 | -0.38 | -0.66 | -1.17 | -0.01 |
| SNRF513     | 874    | NM_021208    | 9437 | 0.58  | 0.05  | 0.23  | 0.08  | 0.05  | 0.05  | 0.18  | 0.05  | 0.12  | 0.61  | 0.55  | 0.01  |
| SEH1        | 94009  | NM_170694    | 9438 | -0.23 | 0.27  | 0.25  | 0.01  | -0.69 | -0.58 | -0.23 | 0.11  | 0.11  | -0.28 | -1.27 | -0.01 |
| XPO5        | 57510  | NM_002750    | 9439 | -0.71 | -0.37 | -0.75 | -0.64 | -1.17 | -0.90 | -0.12 | 0.51  | -0.40 | -1.84 | -2.72 | -0.01 |
| DHRS1       | 20760  | NM_001477    | 9440 | -0.69 | -0.48 | -0.43 | -0.80 | -1.01 | -1.08 | -0.40 | -0.18 | -1.08 | -1.60 | -1.01 | -0.01 |
| LCPI        | 3936   | NM_002298    | 9441 | 0.85  | -0.21 | 0.28  | -0.37 | -0.48 | -0.63 | -0.73 | 0.05  | 0.68  | 0.78  | -1.48 | -0.01 |
| MAL2        | 114569 | NM_052886    | 9442 | 0.08  | -0.24 | -0.35 | 0.06  | -0.44 | -0.60 | 0.29  | -0.25 | -0.05 | -0.51 | -0.98 | -0.01 |
| TFAM        | 7019   | NM_003001    | 9443 | 0.19  | -0.69 | -0.52 | 0.03  | -1.14 | -0.92 | 0.12  | 0.32  | -0.44 | -1.02 | -0.19 | -0.01 |
| SNRP        | 54988  | NM_017900    | 9444 | 0.18  | -0.54 | -0.72 | -0.45 | -0.59 | -0.49 | -0.45 | 0.68  | -0.42 | 1.44  | 0.46  | -0.01 |
| NATL8       | 339983 | NM_178557    | 9445 | -0.52 | -0.65 | 0.20  | 0.83  | 0.86  | 2.39  | 0.37  | -0.21 | -0.17 | -0.98 | -0.48 | -0.01 |
| UBE3C       | 9690   | NM_014671    | 9446 | 0.35  | 0.20  | -0.58 | 0.63  | 0.62  | 0.00  | 0.09  | 0.34  | -0.24 | -0.03 | 1.24  | -0.01 |
| ITIH1       | 51174  | NM_001261    | 9447 | 0.00  | 1.26  | -0.08 | 0.10  | -0.40 | -0.08 | -0.10 | 0.00  | -0.11 | 1.23  | 0.08  | -0.01 |
| ADCK2       | 90956  | NM_052853    | 9448 | -0.23 | 0.11  | -0.18 | -0.24 | -0.29 | 0.04  | 0.10  | 0.05  | -0.16 | -0.30 | -0.50 | -0.01 |
| NALP4       | 147945 | NM_134444    | 9449 | -0.61 | 0.05  | -0.21 | 0.75  | -0.38 | -0.56 | -0.52 | 0.08  | 0.43  | -0.77 | -0.19 | -0.01 |
| TPV3        | 5589   | NM_005646    | 9450 | -0.35 | 0.82  | 0.17  | 0.35  | 0.85  | 0.81  | -0.23 | 0.38  | 0.44  | 0.94  | 0.02  | 0.01  |
| LOC391123   | 391123 | NM_001013661 | 9451 | -0.30 | 1.10  | -1.23 | 0.16  | 2.01  | -0.06 | 1.80  | -1.18 | -0.63 | -2.62 | -2.11 | -0.01 |
| ACF2        | 23028  | NM_015013    | 9452 | 0.91  | 0.51  | 0.02  | -0.90 | -0.02 | 1.00  | 0.44  | -0.01 | -0.44 | 1.44  | -0.82 | -0.01 |
| LOC728269   | 728269 | NM_001080790 | 9453 | -0.51 | 0.29  | -0.68 | -0.13 | 0.09  | 0.00  | 0.07  | 0.58  | -0.67 | -0.90 | -0.04 | -0.01 |
| CHB7        | 5474   | NM_019698    | 9454 | 0.57  | 1.03  | 1.31  | 0.39  | 1.71  | 0.39  | 0.29  | -0.18 | 0.29  | 2.93  | 2.82  | 0.01  |
| DKFZ7619111 | 128889 | NM_152906    | 9455 | 0.21  | 0.02  | -0.46 | 0.25  | 0.20  | -0.37 | -0.07 | -0.33 | 0.39  | -0.24 | -0.07 | -0.01 |
| SPL28       | 56628  | NM_020172    | 9456 | 0.36  | 0.03  | 0.11  | 0.03  | -0.21 | -0.14 | -0.05 | -0.13 | 0.17  | 0.50  | -0.32 | -0.01 |
| MBD2        | 663    | NM_001005849 | 9457 | 1.29  | 1.60  | 0.01  | 0.88  | 0.67  | 0.88  | 0.87  | 0.28  | 0.68  | 2.05  | 2.73  | 0.01  |
| MBD5        | 55777  | NM_018328    | 9458 | -0.26 | 0.00  | -0.36 | -0.37 | -0.41 | -0.31 | -0.15 | 0.19  | -0.05 | -0.63 | -1.09 | -0.01 |
| PHF21A      | 51317  | NM_016621    | 9459 | -0.63 | -0.04 | -0.28 | -0.37 | 0.93  | -0.70 | 0.05  | -0.47 | 0.41  | -0.96 | -0.14 | -0.01 |
| NM5CL       | 5801   | NM_001497    | 9460 | -0.45 | -0.25 | 0.45  | 0.43  | -0.25 | -0.47 | -0.25 | -0.47 | -0.25 | -0.47 | -0.25 | -0.01 |
| CKL12       | 6387   | NM_001013886 | 9461 | 0.08  | 0.64  | 0.44  | -0.44 | 0.18  | 0.36  | -0.23 | 0.19  | 0.03  | 1.00  | 0.10  | -0.01 |
| DKFZ860091  | 25895  | NM_015433    | 9462 | 0.20  | -0.55 | 1.00  | 1.09  | -0.19 | 1.10  | -0.35 | -0.08 | 0.42  | 0.66  | 1.00  | -0.01 |
| MMP17       | 4326   | NM_016155    | 9463 | 0.05  | -0.37 | 0.72  | 0.62  | 0.32  | -0.51 | -0.22 | -0.50 | 0.71  | 0.40  | 0.44  | -0.01 |
| TF2         | 7032   | NM_005423    | 9464 | 0.79  | 0.02  | 0.37  | 0.67  | 0.07  | 0.03  | 0.69  | 0.21  | 0.67  | 0.44  | 1.65  | 0.01  |
| E1F57       | 8664   | NM_003753    | 9465 | -0.92 | -0.12 | -0.64 | -0.33 | 0.19  | -0.99 | -0.71 | -0.11 | 0.81  | -1.68 | -1.14 | -0.01 |
| ATP9B9      | 16408  | NM_001130514 | 9466 | 0.44  | 0.17  | -0.31 | 0.14  | 0.20  | -0.17 | 0.45  | -0.13 | -0.34 | 0.30  | 0.17  | -0.01 |
| GRD3        | 8410   | NM_0019879   | 9467 | 0.72  | 0.26  | 0.07  | 0.72  | 0.63  | 0.29  | 0.68  | -0.42 | 0.79  | 1.05  | 1.27  | 0.01  |
| BIX         | 638    | NM_001197    | 9468 | 0.27  | 0.98  | 2.32  | 0.00  | 1.30  | 1.44  | -0.20 | -0.30 | 0.49  | 3.57  | 2.74  | -0.01 |
| ATP9VD2     | 245972 | NM_152565    | 946  |       |       |       |       |       |       |       |       |       |       |       |       |

|             |        |              |      |       |       |       |       |       |       |       |       |       |       |       |       |
|-------------|--------|--------------|------|-------|-------|-------|-------|-------|-------|-------|-------|-------|-------|-------|-------|
| KMA10       | 3744   | NMM_005549   | 9551 | 0.48  | -0.18 | 0.00  | 0.79  | 0.23  | 0.51  | 0.30  | -0.14 | -0.20 | 0.30  | 1.53  | -0.04 |
| MC66        | 5883   | NMM_00102828 | 9552 | -0.40 | -0.01 | -0.21 | -0.01 | 0.85  | -0.81 | -0.37 | 0.59  | -0.28 | -0.63 | -1.98 | -0.04 |
| RAPH1       | 65099  | NMM_025252   | 9553 | 0.17  | 0.10  | -0.45 | 0.30  | -0.67 | -0.61 | -0.10 | -0.17 | -0.12 | -0.52 | 0.98  | -0.04 |
| ZIC2        | 7546   | NMM_007129   | 9554 | 0.47  | -0.14 | 0.24  | -0.26 | 0.73  | 0.07  | 0.48  | -0.51 | -0.01 | 0.57  | 0.55  | -0.05 |
| MTF         | 4484   | NMM_005949   | 9555 | 0.08  | -0.08 | 1.48  | -0.08 | -0.16 | 0.50  | -0.25 | -0.25 | 0.55  | 1.48  | 0.27  | -0.05 |
| SHRR2       | 662    | NMM_198020   | 9556 | 0.04  | 0.40  | -0.20 | 0.22  | 2.94  | 0.24  | 0.44  | 0.15  | -0.20 | 0.19  | 5.58  | -0.05 |
| LOC153770   | 153770 | NMM_00102869 | 9557 | 1.02  | 3.09  | 2.38  | 1.39  | 0.61  | 1.92  | -0.24 | 0.43  | -0.23 | 6.50  | 3.92  | -0.05 |
| AGP9        | 366    | NMM_020980   | 9558 | 0.26  | -0.48 | -0.35 | -0.18 | -0.22 | 0.21  | 0.78  | -0.42 | -0.40 | -0.57 | -0.19 | -0.05 |
| MGC45491    | 22145  | NMM_005246   | 9559 | 0.53  | 0.54  | -0.20 | 0.53  | 0.15  | 0.54  | -0.12 | 0.16  | -0.12 | 0.36  | 2.38  | -0.05 |
| DND1        | 373863 | NMM_194249   | 9560 | 0.55  | -0.02 | 0.49  | 0.20  | 0.16  | 0.17  | 0.25  | -0.28 | -0.02 | 1.02  | 0.53  | -0.05 |
| CD52        | 8760   | NMM_003818   | 9561 | 0.21  | 0.35  | 0.14  | 0.64  | 0.06  | 1.20  | 0.00  | 0.16  | -0.21 | 0.79  | 1.60  | -0.05 |
| FLJ20010    | 5449   | NMM_001321   | 9562 | 1.65  | -0.17 | 0.09  | 0.41  | 0.89  | 1.25  | -0.41 | 0.51  | -0.41 | 1.39  | 2.65  | -0.05 |
| ANXA13      | 312    | NMM_004306   | 9563 | 0.01  | 0.14  | -0.49 | -0.25 | -0.70 | 0.28  | 0.02  | 0.73  | -0.79 | 0.34  | -0.07 | -0.05 |
| SHKBP1      | 92799  | NMM_138392   | 9564 | -0.78 | 0.11  | -0.08 | -0.49 | -0.65 | -1.01 | -0.43 | -0.20 | 0.58  | -0.96 | -2.15 | -0.05 |
| SLC2A5      | 6518   | NMM_003039   | 9565 | -0.02 | -0.14 | 0.00  | -0.20 | -0.43 | 0.04  | -0.17 | 0.13  | -0.01 | 0.12  | -0.59 | -0.05 |
| FLJ23447    | 79881  | NMM_024825   | 9566 | -1.27 | 0.26  | -0.91 | 0.06  | -0.38 | 0.51  | -0.86 | 0.75  | 0.06  | 2.43  | 0.84  | -0.05 |
| XPA         | 7507   | NMM_000380   | 9567 | 0.70  | 0.48  | 0.83  | 0.91  | 2.19  | 0.22  | 0.36  | -0.55 | 0.13  | 2.02  | 3.32  | -0.05 |
| HNAF7       | 168537 | NMM_153236   | 9568 | 0.59  | 0.84  | 1.58  | 0.99  | 0.89  | 1.08  | -0.27 | 0.19  | 0.03  | 3.01  | 2.94  | -0.05 |
| TRIP5       | 9318   | NMM_000426   | 9569 | 1.41  | 1.43  | 0.74  | 1.26  | 1.39  | 1.52  | 0.03  | -0.05 | -0.04 | 3.58  | 4.18  | -0.05 |
| ZMYND19     | 116225 | NMM_138462   | 9570 | 0.91  | 0.47  | 0.18  | 0.00  | 0.03  | -0.23 | 0.06  | -0.30 | 0.19  | 1.56  | 2.20  | -0.05 |
| LOC390231   | 390231 | NMM_936301   | 9571 | 10.29 | 7.58  | 10.16 | 8.71  | 8.57  | 6.90  | 0.37  | -0.45 | 0.02  | 28.03 | 24.18 | -0.05 |
| DYNC1H1     | 1378   | NMM_001376   | 9572 | 0.88  | 0.17  | 0.75  | 0.01  | 0.34  | 0.64  | 0.06  | -0.19 | 0.08  | 1.81  | 1.10  | -0.05 |
| NVD-SP12    | 83893  | NMM_031955   | 9573 | 0.14  | 0.03  | -0.68 | -0.04 | -0.47 | -0.57 | 0.04  | 0.23  | -0.32 | -0.52 | -1.08 | -0.05 |
| CREB3       | 10488  | NMM_006368   | 9574 | 0.11  | 0.15  | -0.24 | -0.25 | 0.13  | -0.29 | -0.16 | -0.18 | 0.30  | 0.03  | -0.41 | -0.05 |
| OKT2        | 401992 | NMM_00104136 | 9575 | -0.51 | 0.14  | -0.26 | -0.74 | -0.15 | -0.32 | -0.39 | 0.02  | 0.31  | -0.64 | -1.21 | -0.05 |
| CTN2        | 6900   | NMM_005076   | 9576 | -0.44 | -1.18 | -0.06 | -0.79 | 0.84  | -0.65 | 0.01  | -0.46 | 0.39  | -1.68 | -2.28 | -0.05 |
| UBE3A       | 7317   | NMM_130838   | 9577 | 0.07  | -0.22 | -0.18 | 0.94  | 0.25  | 1.08  | -0.27 | 0.26  | -0.05 | -0.33 | 2.27  | -0.05 |
| BD3         | 493861 | NMM_00108394 | 9578 | 0.25  | -0.74 | -0.46 | -0.47 | 0.23  | 0.51  | 0.18  | -0.39 | 0.15  | -0.95 | -0.76 | -0.06 |
| 1052        | 1052   | NMM_000000   | 9579 | 0.27  | 0.08  | -0.47 | -0.27 | 0.45  | 0.27  | 0.19  | -0.77 | 0.02  | 0.28  | 1.07  | -0.06 |
| PPP1R3F     | 89801  | NMM_033215   | 9580 | 0.16  | -0.50 | -0.74 | 1.50  | -0.57 | -0.13 | 0.23  | 0.39  | -0.67 | -1.08 | 1.06  | -0.06 |
| FLJ35779    | 134549 | NMM_152408   | 9581 | 0.57  | 1.17  | 1.35  | 1.04  | 0.83  | 1.67  | -0.45 | 0.48  | -0.08 | 3.08  | 3.54  | -0.06 |
| NR0         | 201    | NMM_001117   | 9582 | -0.37 | -0.13 | 0.67  | -0.67 | -0.33 | 0.43  | 0.17  | 0.03  | 0.10  | 1.80  | 1.22  | -0.06 |
| ABCAG       | 23460  | NMM_080284   | 9583 | 0.92  | 0.00  | 0.31  | -0.28 | 0.51  | 0.65  | 0.41  | -0.12 | -0.34 | 1.23  | 0.88  | -0.06 |
| SABA2       | 51128  | NMM_016103   | 9584 | -0.95 | -0.08 | -0.19 | 0.37  | -0.10 | 0.09  | -0.20 | -0.05 | 0.19  | -1.22 | 0.37  | -0.06 |
| RH3L3       | 345895 | NMM_00110892 | 9585 | -1.38 | -0.33 | 0.23  | 0.31  | 0.40  | -0.44 | -0.58 | -0.47 | 0.95  | -0.47 | 0.27  | -0.06 |
| NFRF108     | 879    | NMM_147187   | 9586 | -0.70 | 0.88  | -0.31 | -0.65 | 0.38  | -0.67 | 0.67  | 0.06  | 0.13  | -1.27 | 1.49  | -0.06 |
| CS19        | 128822 | NMM_00108693 | 9587 | -0.05 | 0.17  | 0.84  | -0.06 | 0.69  | -0.09 | -0.48 | -0.74 | 1.16  | 0.95  | 0.55  | -0.06 |
| OXCL10      | 3627   | NMM_001565   | 9588 | 0.46  | 0.76  | 0.58  | -0.52 | 0.58  | -0.34 | -0.20 | 0.03  | 0.10  | 1.80  | -0.28 | -0.06 |
| LOC401644   | 402644 | NMM_00126493 | 9589 | 0.35  | 0.38  | -0.50 | -0.36 | -0.22 | 0.68  | -0.16 | -0.22 | 0.68  | -1.23 | 2.02  | -0.06 |
| MMP14       | 4323   | NMM_004995   | 9590 | 1.24  | 0.12  | -0.02 | 0.46  | -0.02 | 0.90  | 0.26  | -0.09 | -0.22 | 1.33  | 1.56  | -0.06 |
| AMR025      | 25959  | NMM_015493   | 9591 | 0.43  | -0.66 | 0.59  | 0.52  | 0.06  | -0.02 | 0.30  | -0.46 | 0.10  | 0.37  | 0.57  | -0.06 |
| NFZT5       | 1838   | NMM_01503845 | 9592 | -0.33 | -0.39 | -0.23 | -0.67 | -0.38 | -0.01 | -0.27 | -0.47 | 0.01  | -0.92 | -1.60 | -0.06 |
| MGC51882    | 84970  | NMM_032884   | 9593 | 0.07  | 0.57  | -0.72 | -0.87 | -1.13 | -0.08 | 0.71  | -0.31 | -0.46 | 1.28  | 2.08  | -0.06 |
| DKFZ434422  | 92255  | NMM_00100727 | 9594 | 0.57  | 1.37  | 1.81  | 4.66  | 1.50  | 1.95  | -0.28 | 0.30  | -0.09 | 3.74  | 8.11  | -0.06 |
| DKFZ443C195 | 25746  | NMM_207343   | 9595 | 2.52  | 1.94  | 2.42  | 7.12  | 3.73  | 3.37  | -0.33 | -0.39 | 0.66  | 6.87  | 14.22 | -0.06 |
| CA3         | 922    | NMM_000021   | 9596 | 0.91  | -0.25 | -0.85 | -0.17 | 0.02  | 0.55  | -0.17 | 0.02  | -0.55 | 2.40  | 3.59  | -0.06 |
| PAX3        | 5077   | NMM_013942   | 9597 | -0.40 | -0.63 | -0.14 | -0.27 | -0.85 | -1.15 | -0.52 | -0.18 | 0.64  | -1.17 | -2.27 | -0.06 |
| KLX6        | 5653   | NMM_00101266 | 9598 | -0.60 | -0.92 | -0.54 | -1.41 | -1.53 | -1.30 | -0.33 | -0.20 | 0.46  | -2.06 | -4.24 | -0.06 |
| PF6         | 200162 | NMM_000000   | 9599 | 0.42  | 0.47  | 0.47  | 0.12  | 0.12  | 0.47  | 0.12  | 0.12  | 0.47  | 0.77  | 0.35  | -0.06 |
| KMA1504     | 114794 | NMM_025906   | 9600 | -0.46 | 0.42  | -0.53 | -0.77 | -0.46 | -1.16 | -0.14 | 0.31  | -0.23 | -0.58 | -1.39 | -0.06 |
| UTSD2       | 257313 | NMM_198152   | 9601 | 1.31  | 0.29  | 0.36  | 0.17  | 0.14  | 0.94  | 0.43  | -0.10 | -0.40 | 1.96  | 0.92  | -0.06 |
| POU3B8      | 55709  | NMM_00103082 | 9602 | -0.40 | -0.26 | 0.00  | -0.38 | 0.00  | -0.04 | -0.37 | -0.04 | 0.00  | -0.55 | -0.55 | -0.06 |
| OTU18       | 55611  | NMM_017670   | 9603 | 0.81  | 0.80  | 0.00  | 0.91  | 0.87  | 1.39  | 0.35  | 0.11  | -0.53 | 1.61  | 3.17  | -0.07 |
| LOC126208   | 126208 | NMM_00102836 | 9604 | -0.74 | -0.48 | -0.72 | -0.33 | 0.60  | -0.85 | -0.53 | -0.29 | 0.75  | -1.93 | -0.58 | -0.07 |
| SFP1        | 51734  | NMM_016132   | 9605 | -0.56 | -0.87 | -0.71 | -1.23 | -1.00 | -0.94 | 0.25  | 0.09  | -0.40 | -1.25 | -2.77 | -0.07 |
| MGC40402    | 204092 | NMM_152697   | 9606 | 0.01  | -0.17 | -0.45 | -0.04 | -0.03 | -0.17 | -0.03 | -0.17 | 0.02  | 0.06  | 0.73  | -0.07 |
| BC12L14     | 79370  | NMM_138724   | 9607 | -0.93 | -1.13 | -0.58 | -1.16 | -1.20 | -1.28 | -0.15 | -0.47 | 0.56  | -2.64 | -3.65 | -0.07 |
| 14DRF11     | 55837  | NMM_018453   | 9608 | 0.99  | 0.69  | 0.58  | 1.62  | 0.82  | 1.11  | 0.10  | 0.18  | -0.35 | 2.26  | 3.56  | -0.07 |
| NRA0117     | 23820  | NMM_015024   | 9609 | -0.87 | 0.83  | -0.10 | -0.71 | -0.81 | -1.15 | 0.07  | -0.10 | 0.71  | -2.70 | 3.05  | -0.07 |
| ZEF1        | 23140  | NMM_015113   | 9610 | -0.07 | 0.41  | 0.64  | 0.00  | -0.03 | -0.25 | -0.27 | -0.10 | 0.31  | 1.12  | 0.27  | -0.07 |
| RFS10       | 6204   | NMM_001014   | 9611 | 1.27  | -1.18 | -1.40 | -2.27 | -2.02 | -2.60 | -0.02 | 0.75  | -0.80 | -3.84 | -6.88 | -0.07 |
| DKR1        | 22187  | NMM_00103765 | 9612 | 0.49  | -0.43 | 0.54  | -0.37 | -0.44 | 0.39  | 0.17  | -0.42 | 0.19  | 0.60  | -0.43 | -0.07 |
| NLA1279     | 26128  | NMM_015634   | 9613 | -0.58 | -0.79 | -0.79 | 0.17  | 0.49  | 1.74  | 0.06  | 0.07  | -0.21 | -0.59 | 2.40  | -0.07 |
| DECR1       | 1666   | NMM_001359   | 9614 | -0.64 | -0.28 | -0.37 | 0.08  | -0.71 | -0.15 | -0.79 | 0.86  | -0.14 | -1.29 | -0.78 | -0.07 |
| PHF201      | 51310  | NMM_032025   | 9615 | 0.44  | -0.28 | 0.10  | 0.30  | -0.40 | -0.14 | -0.06 | 0.00  | -0.02 | 0.26  | 0.24  | -0.07 |
| MGC45562    | 12524  | NMM_002349   | 9616 | 0.15  | 0.88  | -0.14 | 0.58  | -0.13 | 0.22  | 0.17  | 0.22  | 0.04  | 0.59  | 0.66  | -0.07 |
| PROX1       | 5629   | NMM_002763   | 9617 | -0.43 | -0.04 | 0.40  | 0.50  | 0.29  | -0.22 | -0.70 | 0.35  | 0.28  | -0.08 | 0.57  | -0.07 |
| NEMF47      | 58500  | NMM_021061   | 9618 | -0.43 | -0.74 | 0.13  | -0.72 | -0.24 | -0.54 | -0.08 | -0.51 | 0.51  | -1.04 | -1.49 | -0.07 |
| NR01        | 382    | NMM_001234   | 9619 | 0.29  | -0.89 | -0.50 | -0.62 | 0.26  | -0.41 | 0.16  | -0.47 | 0.23  | -2.11 | 3.95  | -0.07 |
| OXCL14      | 9547   | NMM_004487   | 9620 | 1.15  | -0.06 | 0.26  | 0.43  | 0.26  | 0.65  | -0.57 | -0.50 | -0.14 | 1.35  | 1.34  | -0.07 |
| P2R7        | 5027   | NMM_177427   | 9621 | 1.33  | -0.28 | 0.35  | 0.73  | 1.83  | 1.23  | 0.83  | -0.75 | -0.16 | 1.39  | 3.80  | -0.07 |
| HND338      | 64669  | NMM_00103992 | 9622 | 0.01  | -0.02 | -0.57 | -1.02 | 0.95  | -0.09 | -0.11 | -0.02 | 0.10  | -0.55 | -0.88 | -0.07 |
| OBSCN       | 84033  | NMM_052843   | 9623 | 0.14  | -0.17 | 1.54  | -0.02 | -0.15 | 0.95  | -0.27 | -0.19 | 0.40  | 1.23  | 0.78  | -0.07 |
| UT47        | 11170  | NMM_00107678 | 9624 | -0.50 | 0.16  | 0.99  | -0.24 | 0.06  | 0.13  | -0.48 | -0.22 | 0.63  | 0.65  | 0.05  | -0.07 |
| USP9        | 55931  | NMM_017944   | 9625 | -0.26 | 0.29  | -0.16 | -0.66 | -0.12 | 0.27  | -0.14 | 0.31  | -0.25 | -0.13 | -0.51 | -0.07 |
| PC1         | 383    | NMM_020293   | 9626 | -0.14 | -0.41 | -0.81 | -0.42 | -0.70 | -0.81 | -0.25 | -0.49 | -0.15 | -1.65 | 2.69  | -0.07 |
| TTL         | 150465 | NMM_153712   | 9627 | 0.52  | 0.00  | 0.42  | -0.36 | -0.38 | 0.51  | -0.41 | -0.18 | -0.37 | 0.95  | 0.23  | -0.07 |
| AP152       | 8905   | NMM_003916   | 9628 | 0.16  | 0.00  | -0.01 | 0.22  | 0.25  | -0.17 | -0.11 | -0.30 | 0.33  | 0.16  | 0.30  | -0.07 |
| CDNF11      | 16740  | NMM_015234   | 9629 | 0.71  | 0.79  | 0.59  | 0.18  | 1.19  | 1.02  | 0.12  | 0.27  | 0.24  | 0.51  | 0.16  | -0.07 |
| FLJ14146    | 79762  | NMM_024709   | 9630 | -0.31 | -0.27 | -0.51 | -1.24 | -0.69 | -0.03 | 0.73  | -0.67 | -0.14 | -1.09 | -0.52 | -0.07 |
| TAF1A       | 901    |              |      |       |       |       |       |       |       |       |       |       |       |       |       |

|            |        |             |      |       |       |       |       |       |       |       |       |       |       |       |       |
|------------|--------|-------------|------|-------|-------|-------|-------|-------|-------|-------|-------|-------|-------|-------|-------|
| GRMS       | 2915   | NM_000942   | 9713 | -0.68 | -0.93 | -0.20 | -0.51 | -0.48 | -1.14 | -0.12 | -0.64 | 0.65  | -1.81 | -2.13 | -0.11 |
| HPZP434L17 | 84076  | NM_001236   | 9714 | -0.34 | -0.60 | -0.31 | -0.47 | -0.43 | -0.93 | 0.17  | -0.31 | 0.17  | -1.61 | -1.51 | -0.11 |
| ELAI       | 1990   | NM_001971   | 9715 | 0.21  | 0.47  | 0.83  | -0.61 | 0.60  | 0.73  | -0.03 | 0.00  | 0.08  | 1.51  | 1.72  | -0.11 |
| AKR7A3     | 22977  | NM_012067   | 9716 | -0.35 | 1.19  | 0.31  | 0.16  | 1.20  | -0.01 | -0.05 | 0.20  | -0.25 | 1.15  | 1.35  | -0.11 |
| SLL142     | 4891   | NM_000617   | 9717 | 1.55  | -0.14 | 1.11  | 0.72  | 1.30  | 0.74  | 0.24  | -0.14 | -0.21 | 2.52  | 2.77  | -0.11 |
| CI01067    | 5661   | NM_001152   | 9718 | 0.57  | 0.18  | 0.50  | 0.18  | 0.50  | -0.23 | -0.61 | 0.23  | 0.11  | 0.11  | 0.30  | -0.11 |
| ROX        | 5962   | NM_002906   | 9719 | -0.48 | -0.88 | -0.40 | 0.00  | -0.53 | -1.19 | -0.29 | -0.51 | 0.69  | -1.77 | -1.73 | -0.11 |
| FOXP1      | 27086  | NM_00102505 | 9720 | -0.97 | 0.08  | 0.25  | 0.24  | 0.22  | 0.03  | 0.29  | -0.20 | -0.19 | 1.30  | 0.50  | -0.11 |
| SRB3       | 6747   | NM_001037   | 9721 | 0.21  | -0.84 | -0.61 | 0.44  | -0.62 | 0.44  | 0.92  | -0.46 | -0.37 | -0.73 | 0.55  | -0.11 |
| RDPB       | 7936   | NM_002904   | 9722 | -0.20 | -0.78 | -0.09 | -1.61 | -0.95 | -0.35 | 1.18  | -0.36 | -0.93 | -2.06 | -2.90 | -0.11 |
| ESRA       | 2101   | NM_004451   | 9723 | 1.25  | -0.04 | 1.97  | 1.73  | 2.28  | 1.69  | 0.10  | -0.34 | 0.13  | 3.19  | 5.69  | -0.11 |
| PA0P1L     | 22976  | NM_0010349  | 9724 | -0.48 | -0.12 | 0.30  | -0.45 | -0.34 | 0.10  | -0.05 | 0.10  | 0.00  | 0.00  | 0.24  | -0.11 |
| OR9G5      | 504195 | NM_00101358 | 9725 | -0.69 | 0.59  | 0.62  | -0.51 | -0.56 | -0.41 | -0.66 | -0.46 | 1.03  | -0.66 | -1.47 | -0.11 |
| ATG4D      | 84971  | NM_003285   | 9726 | -0.50 | -0.98 | -0.72 | -1.04 | -0.47 | -0.55 | 0.25  | -0.31 | -0.05 | -0.20 | -2.06 | -0.11 |
| H2AF2      | 3033   | NM_002106   | 9727 | -0.25 | -0.54 | -0.21 | -0.09 | -0.49 | -0.73 | -0.32 | -0.38 | 0.58  | -1.00 | -1.29 | -0.11 |
| SNARK      | 81786  | NM_030952   | 9728 | -0.52 | -1.01 | -0.44 | -0.84 | -0.68 | -0.07 | 0.10  | -0.53 | 0.51  | 2.06  | 2.19  | -0.11 |
| PTP22      | 26191  | NM_012411   | 9729 | 1.44  | 1.22  | 1.53  | 0.88  | 0.28  | 0.84  | -0.19 | -0.06 | 0.14  | 4.20  | 2.00  | -0.11 |
| LOC498856  | 498856 | NM_00100888 | 9730 | 0.49  | -0.73 | -0.28 | 0.27  | 0.07  | 0.50  | 1.02  | -0.80 | -0.33 | -0.52 | 0.84  | -0.11 |
| ANKK3      | 310    | NM_001156   | 9731 | 0.43  | 0.33  | 0.71  | 1.01  | 0.27  | 0.24  | -0.41 | 0.33  | -0.03 | 1.47  | 1.52  | -0.11 |
| DHTY01     | 55526  | NM_018706   | 9732 | -0.08 | 0.35  | 0.21  | -0.07 | -0.32 | -1.14 | -0.39 | 0.15  | 0.12  | 0.48  | -0.54 | -0.11 |
| GMPAT      | 8443   | NM_014236   | 9733 | 0.66  | 0.31  | 0.24  | 0.57  | 0.30  | 0.08  | 0.08  | -0.04 | -0.15 | 1.21  | 0.93  | -0.11 |
| RGSL1      | 10836  | NM_006480   | 9734 | -1.15 | -0.07 | -0.76 | -0.42 | 0.12  | 0.37  | -0.52 | 0.99  | -0.58 | -2.00 | 0.07  | -0.11 |
| SRGAP2     | 9901   | NM_00103316 | 9735 | 0.44  | 0.22  | 0.32  | 0.67  | 0.89  | 0.30  | -0.08 | -0.23 | 0.19  | 0.99  | 1.86  | -0.12 |
| KPNA1      | 3836   | NM_002264   | 9736 | 0.99  | 0.74  | 0.77  | 0.98  | 0.72  | 0.86  | 0.11  | -0.33 | 0.11  | 2.50  | 2.55  | -0.12 |
| NMT        | 11185  | NM_006774   | 9737 | -0.73 | -0.68 | -1.22 | -1.13 | -1.06 | -1.09 | -0.04 | 0.28  | -0.35 | -2.63 | -3.25 | -0.12 |
| SEMA4D     | 22917  | NM_025794   | 9738 | 0.41  | 0.55  | 0.01  | 0.26  | 0.36  | 0.64  | -0.01 | 0.21  | -0.31 | 0.97  | 1.26  | -0.12 |
| RBP1       | 5947   | NM_002899   | 9739 | 1.25  | -0.04 | 0.83  | 0.57  | -0.23 | 1.04  | -0.02 | -0.16 | 0.07  | 2.03  | 1.38  | -0.12 |
| HUMPPA     | 30850  | NM_014603   | 9740 | 0.00  | 0.92  | 0.22  | 0.11  | 0.31  | 0.92  | -0.11 | 0.33  | -0.34 | 1.13  | 1.35  | -0.12 |
| 9101       | 9101   | NM_000000   | 9741 | 0.68  | -1.06 | -1.89 | -1.26 | -1.16 | -1.29 | -0.56 | -1.13 | -0.26 | -2.30 | 3.56  | -0.12 |
| KZNH3      | 23416  | NM_012284   | 9742 | 0.44  | -0.57 | -0.47 | 0.89  | 0.98  | 0.24  | -0.04 | 0.23  | -0.31 | -1.49 | 2.11  | -0.12 |
| DC12       | 56941  | NM_002187   | 9743 | 0.89  | -0.13 | -0.27 | 1.10  | 0.37  | 0.58  | 0.39  | -0.30 | -0.20 | 0.48  | 1.05  | -0.12 |
| LOC203076  | 203076 | NM_00104032 | 9744 | 1.70  | -0.29 | -0.22 | 1.39  | -0.02 | -0.05 | -0.41 | 0.00  | -0.11 | 3.41  | 3.57  | -0.12 |
| RAB9B      | 51209  | NM_016370   | 9745 | 0.58  | 0.12  | 0.11  | -0.09 | -0.08 | 0.51  | 0.29  | -0.31 | -0.11 | 0.17  | 0.34  | -0.12 |
| DOX12      | 440081 | KM_495908   | 9746 | 0.61  | 0.41  | -0.40 | -0.37 | -0.03 | -0.31 | 0.24  | -0.01 | -0.35 | 0.62  | 0.71  | -0.12 |
| SSP        | 8682   | NM_005886   | 9747 | 0.21  | 0.73  | 0.52  | 1.34  | 1.98  | 1.41  | 0.10  | -0.22 | 0.00  | 1.26  | 4.74  | -0.12 |
| SIP        | 2710   | NM_00100714 | 9748 | 0.09  | 0.62  | 0.36  | 0.09  | -0.62 | 0.38  | 0.00  | -0.62 | 0.40  | 0.84  | 0.32  | -0.12 |
| AGTRAP     | 57085  | NM_002050   | 9749 | 1.29  | 1.39  | 0.22  | 2.50  | 2.35  | 1.79  | -0.06 | 0.41  | -0.47 | 2.90  | 6.65  | -0.12 |
| SLL141     | 6556   | NM_00103220 | 9750 | 0.34  | 0.67  | -0.50 | 1.24  | 1.58  | 0.10  | 0.22  | -0.07 | -0.27 | 0.52  | 2.92  | -0.12 |
| SPTM1      | 1269   | NM_001294   | 9751 | 1.05  | 0.68  | 0.27  | 0.84  | 1.56  | 0.07  | 1.08  | 0.09  | 0.20  | 0.60  | 1.25  | -0.12 |
| LOC162427  | 162427 | NM_178126   | 9752 | -1.00 | -0.32 | -0.64 | -0.90 | -0.40 | -0.49 | -0.43 | 0.00  | 0.31  | -1.96 | -1.80 | -0.12 |
| BAP1       | 8314   | NM_004456   | 9753 | 1.13  | -0.84 | -0.63 | -1.12 | -0.91 | -0.87 | 0.02  | -0.07 | -0.07 | -1.34 | -1.90 | -0.12 |
| PRKRA23    | 5576   | NM_002157   | 9754 | -0.03 | 0.63  | -0.46 | -0.47 | -0.63 | -0.17 | -0.44 | -0.27 | -0.14 | 1.74  | 1.74  | -0.12 |
| KUAD648    | 23244  | NM_015200   | 9755 | 0.57  | 0.59  | 0.30  | 0.67  | 0.66  | 0.80  | 0.15  | -0.03 | -0.24 | 1.47  | 2.13  | -0.12 |
| CM12       | 51471  | NM_016347   | 9756 | -0.31 | -0.30 | -0.13 | -0.98 | -0.34 | -0.29 | 0.41  | -0.29 | -0.25 | -0.74 | -1.61 | -0.12 |
| ELT01      | 64323  | NM_171262   | 9757 | 0.06  | 0.42  | 0.38  | -0.17 | -0.29 | 0.77  | -0.38 | 0.57  | -0.32 | 0.87  | 0.30  | -0.12 |
| DUPR18     | 150209 | NM_025211   | 9758 | 0.84  | 0.25  | -0.02 | 0.27  | 0.15  | 0.27  | 0.02  | -0.15 | -0.07 | 1.07  | 1.14  | -0.12 |
| MAP1B      | 4131   | NM_032010   | 9759 | 1.07  | 0.33  | 0.23  | 0.75  | 1.10  | 0.69  | -0.15 | 0.33  | -0.30 | 1.63  | 2.54  | -0.13 |
| FLD2052    | 54463  | NM_019000   | 9760 | -0.07 | 0.69  | 0.65  | 0.23  | 0.07  | 0.00  | -0.27 | -0.09 | 0.23  | 1.28  | 0.29  | -0.13 |
| 2597       | 2597   | NM_001044   | 9761 | -0.20 | 0.66  | 0.17  | 0.66  | 0.25  | 0.22  | -0.19 | -0.22 | 0.20  | -0.43 | 0.40  | -0.13 |
| EMR1       | 2015   | NM_001974   | 9762 | -0.26 | 0.05  | -0.69 | -0.42 | -0.80 | -0.65 | -0.29 | 0.59  | -0.43 | -0.90 | -1.86 | -0.13 |
| CIORF56    | 84221  | NM_032261   | 9763 | -0.66 | -0.26 | -0.53 | 0.35  | 0.55  | 0.49  | -0.31 | 0.15  | 0.04  | -1.45 | 1.38  | -0.13 |
| HSTB07     | 84076  | NM_001236   | 9764 | 1.09  | 1.09  | 0.21  | 1.09  | 1.09  | 0.21  | -0.03 | 0.00  | 0.00  | 2.36  | 2.66  | -0.13 |
| PEX16      | 9409   | NM_004813   | 9765 | 2.44  | 0.01  | 1.92  | 1.75  | 2.36  | 1.93  | 0.46  | -0.84 | 0.26  | 4.37  | 6.05  | -0.13 |
| SEPLG      | 6404   | NM_003006   | 9766 | 0.10  | -0.45 | 1.22  | 1.78  | 0.20  | 0.45  | -0.32 | -0.60 | 0.79  | 0.87  | 2.43  | -0.13 |
| KDZ        | 5311   | NM_000297   | 9767 | -0.25 | -0.14 | 0.30  | -0.11 | 0.32  | 0.37  | -0.17 | -0.29 | 0.31  | -0.09 | 0.58  | -0.13 |
| RZL1       | 83856  | NM_031019   | 9768 | 4.23  | 4.52  | 1.23  | 4.36  | 4.31  | 3.03  | -0.02 | -0.00 | -0.79 | 12.06 | 12.06 | -0.13 |
| RPR        | 6103   | NM_000328   | 9769 | -0.41 | 0.38  | 0.57  | 0.15  | 0.12  | 0.26  | -0.22 | -0.16 | 0.26  | 0.54  | 0.53  | -0.13 |
| DUR8       | 377630 | NM_201602   | 9770 | -1.23 | -0.98 | -1.31 | -2.00 | -1.62 | -1.99 | -0.02 | 0.02  | -0.12 | -3.52 | -5.57 | -0.13 |
| DRK0       | 5147   | NM_001601   | 9771 | 0.02  | 0.01  | 0.06  | 0.14  | 0.04  | 0.16  | 0.14  | 0.04  | 0.16  | 1.04  | 1.98  | -0.13 |
| LGL1       | 3996   | NM_001440   | 9772 | -1.21 | -0.92 | -1.64 | -1.91 | -1.59 | -1.93 | -0.49 | 0.56  | -0.20 | -3.77 | -4.53 | -0.13 |
| HSPC121    | 51495  | NM_016395   | 9773 | 0.20  | 0.86  | 0.00  | 1.44  | 1.00  | 1.13  | -0.31 | 0.31  | -0.13 | 1.06  | 3.57  | -0.13 |
| DMPZ98L181 | 133850 | NM_194282   | 9774 | 0.02  | 0.25  | 0.03  | 0.17  | -0.07 | 0.04  | 0.07  | -0.28 | 0.34  | -0.05 | -0.97 | -0.13 |
| ZNF23      | 35335  | NM_181756   | 9775 | 0.72  | 0.96  | 0.60  | 0.60  | 0.59  | 0.51  | -0.11 | -0.19 | -0.21 | 2.28  | 1.70  | -0.13 |
| PRKCA      | 5578   | NM_002737   | 9776 | 0.86  | 0.34  | 0.04  | 1.63  | 0.49  | 0.08  | -0.02 | -0.08 | -0.03 | 1.23  | 2.21  | -0.13 |
| CDRFA9     | 29964  | NM_013397   | 9777 | -0.46 | -0.28 | -0.26 | -0.70 | -0.55 | -0.07 | 0.10  | -0.11 | -0.12 | -1.00 | -1.12 | -0.13 |
| MNRN1      | 2291   | NM_002951   | 9778 | 0.17  | 0.24  | -0.11 | 0.44  | 0.56  | 0.09  | 0.16  | -0.09 | 0.16  | 0.20  | 0.20  | -0.13 |
| PIPSK1     | 138429 | NM_173492   | 9779 | -0.57 | -0.75 | -0.69 | -0.83 | -0.92 | -0.15 | 0.09  | 0.17  | -0.40 | -2.01 | -1.91 | -0.14 |
| MDS018     | 60490  | NM_021823   | 9780 | -0.23 | -0.04 | 0.82  | 0.81  | 0.76  | 0.75  | -0.47 | -0.13 | 0.46  | 0.56  | 2.32  | -0.14 |
| KIF19      | 8859   | NM_004197   | 9781 | -0.71 | 0.76  | 0.23  | -0.79 | -1.44 | -0.97 | -0.44 | -0.29 | -0.14 | -2.75 | 3.90  | -0.14 |
| NCL        | 4691   | NM_005381   | 9782 | -0.78 | -0.33 | -0.34 | -0.62 | 0.86  | -0.47 | 0.52  | -0.43 | -0.22 | 1.10  | -0.24 | -0.14 |
| GRWD1      | 83743  | NM_031485   | 9783 | -0.39 | -0.26 | -0.51 | -0.68 | -0.45 | -0.27 | -0.29 | 0.00  | 0.15  | -1.16 | -1.40 | -0.14 |
| PH2        | 3419   | NM_002168   | 9784 | 1.40  | -0.11 | 0.27  | 0.46  | -0.20 | 0.20  | 0.07  | -0.06 | 0.00  | 1.02  | 1.58  | -0.14 |
| MGC28816   | 91782  | NM_152272   | 9785 | -0.15 | -0.07 | -0.15 | 0.01  | 0.16  | 0.25  | -0.03 | -0.46 | 0.35  | -0.38 | -0.07 | -0.14 |
| ZWILCH     | 55055  | NM_017975   | 9786 | 0.81  | 0.70  | 1.16  | 0.45  | 1.28  | 0.97  | 0.01  | -0.19 | 0.04  | 2.67  | 2.70  | -0.14 |
| FAZ        | 25937  | NM_015472   | 9787 | 2.59  | 1.25  | 1.51  | 1.92  | 0.20  | 2.74  | -0.11 | -0.66 | -0.69 | 5.36  | 4.87  | -0.14 |
| LOC50856   | 50856  | NM_002709   | 9788 | 0.71  | 0.36  | 0.49  | 0.48  | 0.53  | 0.29  | -0.42 | 0.58  | 0.58  | 1.05  | 1.05  | -0.14 |
| PLEKH1     | 59338  | NM_021622   | 9789 | -0.47 | 0.57  | 0.47  | 0.64  | 1.19  | 0.46  | 0.08  | -0.25 | 0.03  | 1.50  | 2.29  | -0.14 |
| F10        | 79608  | NM_944992   | 9790 | -0.12 | -0.12 | -0.18 | -0.22 | 0.01  | 0.83  | -0.04 | -0.54 | 0.44  | -0.42 | -1.04 | -0.14 |
| 101        | 3075   | NM_005568   | 9791 | 1.82  | 1.24  | 1.84  | 1.82  | 1.24  | 1.84  | 0.12  | 0.80  | -0.12 | 2.40  | 1.45  | -0.14 |
| EDG8       | 53637  | NM_030760   | 9792 | 0.06  | 1.06  | 0.68  | 1.15  | 1.32  | 0.44  | -0.64 | -0.01 | 0.51  | 1.79  | 2.92  | -0.14 |
| TRB6       | 3694   | NM_000888   | 9793 | -0.24 | 0.76  | -0.09 | 1.19  |       |       |       |       |       |       |       |       |

|           |        |              |      |       |       |       |       |       |       |       |       |       |       |       |       |
|-----------|--------|--------------|------|-------|-------|-------|-------|-------|-------|-------|-------|-------|-------|-------|-------|
| KBTB04    | 55709  | NM_018095    | 9875 | 0.51  | 0.76  | 2.04  | 1.25  | 1.52  | 0.85  | -0.38 | -0.42 | 0.62  | 3.30  | 3.62  | -0.18 |
| TNFRS14   | 7189   | NM_020327    | 9876 | 0.37  | -0.42 | -0.88 | -0.73 | -0.36 | -0.21 | 0.34  | -0.28 | 0.27  | 0.12  | -0.31 | -0.36 |
| FAM40A    | 85369  | NM_033088    | 9877 | 0.26  | 0.42  | 0.50  | 0.19  | 0.23  | -0.25 | 0.14  | -0.40 | 0.36  | 0.17  | 0.17  | -0.18 |
| SUPI      | 6590   | NM_003064    | 9878 | -0.42 | 0.25  | -0.77 | -0.48 | 0.12  | -0.61 | 0.11  | 0.15  | -0.44 | -0.94 | -0.97 | -0.18 |
| TNEM49    | 81671  | NM_030538    | 9879 | -0.22 | -0.08 | 0.48  | 0.04  | 0.16  | -0.26 | -0.46 | -0.38 | 0.67  | 0.18  | -0.06 | -0.18 |
| CEB9A     | 190    | NM_004964    | 9880 | 0.44  | 0.44  | 0.01  | 0.01  | 0.04  | -0.44 | 0.04  | -0.44 | 0.44  | 0.46  | 0.51  | -0.18 |
| LDRI      | 286676 | NM_175924    | 9881 | -0.75 | 1.68  | 0.21  | 1.81  | 1.05  | 0.66  | -1.10 | 0.67  | 0.25  | 1.15  | 0.53  | -0.18 |
| RA35      | 11021  | NM_006861    | 9882 | -1.13 | -0.34 | 0.86  | -0.03 | -0.02 | -0.48 | -0.23 | -0.29 | 0.31  | 0.39  | -0.53 | -0.18 |
| PS409     | 5715   | NM_003813    | 9883 | 0.16  | 0.28  | 0.61  | 0.10  | 0.12  | 0.67  | 0.10  | 0.28  | 0.69  | 1.09  | 2.41  | -0.18 |
| LOC34527  | 340527 | NM_00101827  | 9884 | 1.02  | 0.04  | 0.66  | 0.97  | 0.01  | 0.36  | 0.22  | -0.26 | 0.14  | 1.72  | 1.13  | -0.18 |
| MGC31370  | 257044 | NM_173807    | 9885 | 0.24  | 0.62  | -0.21 | 0.02  | -0.09 | 0.14  | 0.11  | 0.01  | -0.30 | 0.66  | 0.08  | -0.18 |
| PPF1516A  | 8488   | NM_030820    | 9886 | -0.49 | -0.34 | -0.01 | -0.61 | -0.17 | -0.44 | -0.17 | -0.44 | 0.52  | -0.62 | -0.89 | -0.18 |
| NAV3      | 89795  | NM_014903    | 9887 | 0.68  | 0.60  | -0.48 | -0.62 | -0.93 | -0.65 | -0.38 | 0.10  | 0.10  | 1.76  | 2.19  | -0.18 |
| CC25      | 6370   | NM_148888    | 9888 | 0.80  | -0.32 | -0.31 | -0.16 | -0.07 | -0.21 | 0.67  | -0.55 | 0.30  | 0.18  | -0.43 | -0.18 |
| CALD1     | 400    | NM_031340    | 9889 | -0.03 | 0.54  | 0.87  | -0.12 | 0.42  | -0.08 | -0.44 | -0.49 | 0.75  | 0.30  | 0.22  | -0.18 |
| OSG543    | 39083  | NM_00100443  | 9890 | 1.11  | 0.42  | 0.72  | 2.01  | 1.18  | 0.33  | 0.54  | -0.43 | 0.29  | 2.24  | 5.52  | -0.18 |
| CTAG3     | 285782 | NM_205864    | 9891 | 0.50  | 0.71  | -0.41 | 0.39  | -0.10 | 0.03  | -0.09 | 0.29  | -0.38 | 0.81  | 0.32  | -0.18 |
| TNDC11    | 51061  | NM_015914    | 9892 | 0.86  | 0.64  | 0.33  | 0.36  | 0.75  | 0.21  | 0.46  | -0.36 | -0.29 | 1.83  | 1.31  | -0.18 |
| MOB11A    | 92557  | NM_173468    | 9893 | 0.51  | 0.86  | 0.38  | 1.77  | 0.38  | 1.29  | -0.20 | 0.40  | -0.28 | 2.75  | 2.44  | -0.18 |
| NUC31     | 4924   | NM_006184    | 9894 | -0.27 | -0.71 | 1.09  | 0.21  | 0.11  | 0.05  | -0.57 | -0.54 | 0.93  | 0.11  | 0.37  | -0.19 |
| OR10W1    | 81341  | NM_207374    | 9895 | 0.76  | 2.27  | 0.68  | 1.64  | 1.18  | 3.08  | -0.09 | 0.40  | 0.50  | 3.71  | 5.89  | -0.19 |
| FL20297   | 55627  | NM_017951    | 9896 | -1.28 | -1.43 | -1.48 | -1.65 | -1.45 | -1.55 | 0.11  | -0.53 | 0.23  | -4.18 | -4.66 | -0.19 |
| 3B408-2   | 29781  | NM_014551    | 9897 | 0.12  | 0.06  | -0.61 | -0.45 | 0.05  | 0.57  | 0.67  | -0.24 | -0.62 | -0.55 | 0.17  | -0.19 |
| FLJ2586   | 79673  | NM_024620    | 9898 | -0.05 | 1.00  | -0.05 | 0.05  | 0.59  | -0.18 | -0.08 | -0.08 | -0.18 | 0.90  | 0.46  | -0.19 |
| DDX20     | 11238  | NM_007204    | 9899 | 1.56  | 0.87  | 2.54  | 1.06  | 2.00  | 1.48  | -0.28 | -0.43 | 0.52  | 4.96  | 4.55  | -0.19 |
| ATAD2     | 29032  | NM_014109    | 9900 | 0.15  | -0.43 | 0.25  | -0.03 | 0.43  | 0.71  | -0.20 | -0.58 | 0.59  | 0.02  | 1.13  | -0.19 |
| KRTAP5-5  | 439915 | NM_001001480 | 9901 | -0.15 | 0.18  | -0.46 | 0.65  | 0.66  | 0.25  | -0.39 | 0.32  | -0.12 | -0.42 | 1.56  | -0.19 |
| HLF-BP74  | 50809  | NM_016287    | 9902 | -0.37 | 1.13  | 0.22  | 0.67  | 0.41  | 0.97  | -0.52 | 0.68  | -0.35 | 0.98  | 2.05  | -0.19 |
| HPF2      | 5470   | NM_005239    | 9903 | 0.24  | 0.82  | 0.26  | 0.76  | 0.59  | 0.82  | 0.46  | -0.59 | 0.42  | 1.87  | 1.84  | -0.19 |
| HLF       | 3131   | NM_002126    | 9904 | 0.75  | 0.37  | -0.20 | -0.19 | 0.11  | 0.56  | 0.10  | 0.18  | -0.47 | 0.92  | 0.48  | -0.19 |
| ANK3      | 10566  | NM_006422    | 9905 | -0.58 | 0.07  | -0.56 | -0.52 | 0.30  | -0.80 | -0.36 | 0.11  | 0.06  | -1.07 | -1.01 | -0.19 |
| BTBD9     | 189    | NM_001345    | 9906 | 0.18  | 0.08  | 1.83  | 0.83  | 1.09  | 0.86  | -0.31 | 1.72  | 0.66  | 1.08  | 4.58  | -0.19 |
| NUM1      | 10874  | NM_006681    | 9907 | 0.14  | 0.81  | 0.00  | 0.57  | 0.56  | 1.36  | 0.00  | 0.37  | -0.56 | 0.94  | 2.49  | -0.19 |
| TAS2B60   | 383898 | NM_177437    | 9908 | -0.22 | -0.19 | -0.95 | 0.53  | -0.10 | -0.24 | -0.04 | 0.52  | -0.66 | -1.37 | 0.20  | -0.19 |
| KALZD1    | 81621  | NM_030829    | 9909 | 0.17  | 0.24  | -0.26 | 0.08  | -0.53 | -0.38 | -0.16 | 0.44  | -0.47 | 0.36  | -0.63 | -0.19 |
| SP1       | 6688   | NM_000120    | 9910 | -1.52 | 0.72  | 0.81  | 0.72  | 0.81  | 0.62  | 0.71  | 0.81  | 0.62  | 3.44  | 7.01  | -0.19 |
| PHEMX     | 10077  | NM_139024    | 9911 | -1.26 | -0.26 | -0.71 | -0.53 | -1.06 | -0.49 | -0.80 | 0.78  | -0.17 | -2.22 | -2.08 | -0.19 |
| PPFR2     | 5208   | NM_001018053 | 9912 | -0.73 | 0.10  | 0.88  | -0.31 | -0.54 | 0.23  | -0.34 | -0.17 | 0.32  | 0.26  | -0.62 | -0.19 |
| BR2       | 58     | NM_002327    | 9913 | 0.78  | 0.92  | 0.92  | 0.74  | 0.92  | 0.91  | 0.14  | -0.29 | 0.17  | 2.68  | 0.07  | -0.19 |
| BR2       | 55290  | NM_018310    | 9914 | -0.43 | 0.32  | 0.45  | 0.64  | -0.65 | 0.26  | -0.78 | 0.68  | -0.09 | 0.33  | 0.26  | -0.19 |
| ZNF289    | 84364  | NM_032189    | 9915 | 0.29  | 0.03  | 0.63  | 0.87  | 0.37  | 0.27  | -0.24 | -0.39 | 0.44  | 0.94  | 1.51  | -0.19 |
| PHF18     | 5495   | NM_02133556  | 9916 | -0.19 | 0.35  | -0.14 | 0.99  | -0.19 | 0.68  | 0.78  | 0.18  | 0.69  | 0.68  | 1.60  | -0.19 |
| CDKSRAP1  | 51654  | NM_016682    | 9917 | 0.82  | 0.97  | 1.31  | 1.52  | 1.69  | 0.36  | -0.12 | -0.38 | 0.31  | 1.11  | 3.57  | -0.19 |
| TNMBX     | 7114   | NM_021109    | 9918 | 1.12  | 0.82  | -0.67 | 0.66  | 0.18  | -0.63 | 0.05  | 0.13  | -0.38 | 1.27  | 0.21  | -0.19 |
| DFB130A   | 55894  | NM_018661    | 9919 | -0.93 | -0.50 | -0.19 | -0.61 | -0.83 | -0.48 | -0.54 | -0.40 | 0.74  | -1.62 | -1.92 | -0.19 |
| PCMBP3    | 56102  | NM_002097    | 9920 | 0.32  | 0.32  | 0.54  | 0.14  | 0.14  | 0.14  | 0.14  | 0.14  | 0.14  | 0.54  | 0.40  | -0.19 |
| FLJ3927   | 193285 | NM_152424    | 9921 | 0.42  | 0.78  | 0.02  | 1.19  | 0.54  | 0.36  | -0.25 | 0.20  | -0.14 | 1.21  | 2.10  | -0.19 |
| ZFY       | 7544   | NM_003911    | 9922 | -0.63 | 0.68  | 0.16  | 1.79  | 2.23  | 1.61  | -0.40 | 0.57  | -0.36 | 0.21  | 5.63  | -0.20 |
| RA882A    | 8488   | NM_020802    | 9923 | 0.23  | 0.68  | -0.11 | 0.23  | 0.68  | -0.11 | 0.23  | 0.68  | -0.11 | 0.23  | 0.68  | -0.20 |
| LLSRA     | 3601   | NM_002189    | 9924 | -0.66 | -0.06 | -0.11 | 0.88  | 0.50  | 0.33  | -0.38 | 0.10  | 0.09  | -0.82 | 1.71  | -0.20 |
| MTIA      | 4489   | NM_005946    | 9925 | -0.64 | 0.92  | 0.25  | 1.14  | 1.91  | 2.65  | -0.52 | 0.56  | -0.23 | 0.53  | 5.71  | -0.20 |
| HLA-DPB1  | 3115   | NM_001211    | 9926 | -0.26 | -0.16 | -0.11 | 0.12  | 0.16  | 0.18  | 0.18  | 0.18  | 0.18  | 0.69  | 1.60  | -0.20 |
| NAPA      | 8775   | NM_003827    | 9927 | 1.12  | 1.68  | 0.30  | 1.78  | 2.22  | 1.18  | 0.25  | -0.85 | 0.40  | -2.50 | -5.18 | -0.20 |
| LOC129607 | 129607 | NM_207315    | 9928 | 0.45  | 0.10  | 0.02  | 0.93  | 0.03  | 1.33  | 0.29  | -0.02 | -0.46 | 0.57  | 2.28  | -0.20 |
| DMT1      | 79813  | NM_024757    | 9929 | -0.40 | -0.58 | -0.45 | -0.77 | -0.58 | -0.89 | -0.03 | -0.36 | 0.20  | -1.43 | -2.20 | -0.20 |
| SMC1C     | 56929  | NM_020177    | 9930 | -0.49 | 0.42  | 0.05  | -0.47 | 0.65  | -0.27 | 0.67  | -0.27 | 0.66  | 1.17  | 1.67  | -0.20 |
| FLJ2056   | 79998  | NM_00115116  | 9931 | -0.48 | 0.21  | 0.00  | -0.50 | -0.53 | -0.44 | -0.47 | 0.00  | 0.27  | -1.47 | -1.47 | -0.20 |
| LOC1      | 23641  | NM_021217    | 9932 | -0.55 | 0.03  | -0.78 | -0.24 | -0.89 | -0.62 | -0.56 | 0.69  | -0.34 | -0.36 | -1.76 | -0.20 |
| PC18      | 515    | NM_000924    | 9933 | 0.76  | 0.58  | 0.17  | 0.89  | -1.07 | -0.39 | -1.07 | -0.39 | -1.07 | -2.46 | -3.36 | -0.20 |
| SNH1      | 54334  | NM_018984    | 9934 | 0.02  | 0.57  | 0.56  | 0.84  | 0.52  | 1.49  | -0.19 | 0.16  | -0.18 | 1.15  | 2.84  | -0.20 |
| SVZ       | 9900   | NM_014849    | 9935 | -0.54 | 0.39  | -0.46 | 1.21  | 0.69  | 0.41  | -0.65 | 0.97  | 0.51  | -0.61 | 2.30  | -0.20 |
| NR3L1A    | 4361   | NM_005591    | 9936 | -0.04 | 0.42  | 0.40  | 0.20  | 0.38  | 0.16  | -0.37 | 0.06  | -0.16 | 0.78  | 0.51  | -0.20 |
| FLJ1403   | 38937  | NM_001001669 | 9937 | 0.14  | 0.17  | 0.54  | -0.05 | -0.03 | 0.03  | -0.08 | -0.45 | 0.33  | 0.85  | 0.05  | -0.20 |
| EFEMP1    | 2202   | NM_018894    | 9938 | -0.42 | -0.06 | -0.43 | -0.62 | -0.96 | -0.72 | -0.23 | 0.05  | -0.02 | -0.91 | -2.29 | -0.20 |
| NRM165    | 49470  | NM_152470    | 9939 | 1.85  | 2.46  | 1.13  | 4.47  | 2.91  | 2.79  | -0.40 | 0.03  | -0.19 | 5.04  | 10.53 | -0.20 |
| PHB       | 58     | NM_002324    | 9940 | 0.34  | 0.91  | 0.65  | 0.34  | 0.25  | 0.74  | -0.10 | 0.00  | 0.12  | 1.22  | 1.29  | -0.20 |
| SFRS14    | 10147  | NM_014884    | 9941 | 0.55  | 0.28  | -0.22 | -0.12 | 0.39  | 0.31  | 0.06  | 0.08  | -0.34 | 0.62  | 0.58  | -0.20 |
| RAP1GDS1  | 5910   | NM_021159    | 9942 | -1.19 | -0.34 | 0.06  | 0.14  | -0.29 | 0.11  | 0.21  | -0.41 | 0.00  | -0.47 | -0.04 | -0.20 |
| HAT       | 9487   | NM_000462    | 9943 | 0.77  | 0.20  | 0.84  | 0.48  | 0.40  | 0.12  | 0.48  | -0.40 | 0.12  | 0.51  | 1.11  | -0.20 |
| C3orf65   | 646600 | NM_001039788 | 9944 | 1.96  | 1.69  | 1.06  | 2.18  | 3.31  | 2.34  | 0.53  | -0.45 | -0.28 | 4.71  | 7.83  | -0.20 |
| LOC284274 | 284274 | NM_001037331 | 9945 | -0.14 | 0.59  | 0.27  | 0.76  | 0.73  | 0.47  | -0.46 | 0.14  | 0.11  | 0.73  | 1.96  | -0.20 |
| DISP8     | 186    | NM_000420    | 9946 | 0.25  | -0.28 | 0.22  | 0.10  | 0.33  | 0.28  | 0.10  | 0.33  | 0.28  | 0.29  | 2.12  | -0.20 |
| FLJ3964   | 162353 | NM_173527    | 9947 | 0.29  | 0.60  | -0.79 | 0.07  | 0.12  | -0.38 | 0.21  | -0.24 | 0.24  | -1.69 | -0.19 | -0.20 |
| SC3RAL3   | 91252  | NM_152264    | 9948 | -0.15 | 0.57  | -0.14 | 0.00  | 0.88  | 0.97  | -0.51 | 0.38  | -0.07 | 0.29  | 1.85  | -0.20 |
| SNM1      | 6613   | NM_005985    | 9949 | 1.26  | 2.75  | -0.01 | 0.76  | 1.36  | 1.60  | 0.19  | 0.26  | -0.65 | 4.00  | 3.72  | -0.20 |
| SNR302    | 55900  | NM_00101230  | 9950 | 0.59  | 0.36  | 0.05  | 1.74  | 2.07  | 0.62  | 0.82  | 0.17  | 0.27  | 1.44  | 2.26  | -0.20 |
| SPRR3     | 6707   | NM_005416    | 9951 | 0.34  | -0.59 | 0.60  | 0.61  | 0.67  | 0.82  | 0.62  | -0.68 | -0.14 | 0.36  | 2.10  | -0.20 |
| CYP27A1   | 1593   | NM_000784    | 9952 | 0.59  | 0.46  | -0.82 | 0.68  | 0.24  | 0.10  | 0.03  | 0.26  | -0.49 | 0.23  | 1.02  | -0.20 |
| FLJ15717  | 16717  | NM_021404    | 9953 | 0.01  | 0.37  | 0.74  | 0.01  | 0.37  | 0.74  | 0.01  | 0.37  | 0.74  | 0.01  | 0.37  | -0.20 |
| TEF2      | 7089   | NM_003260    | 9954 | -0.10 | -0.70 | 0.11  | 0.15  | -0.67 | -1.52 | -0.15 | -0.36 | 0.31  | -0.49 | -1.04 | -0.21 |
| HLFB28    | 245939 | NM_001037732 |      |       |       |       |       |       |       |       |       |       |       |       |       |

|           |        |              |       |       |       |       |       |       |       |       |       |       |       |       |       |
|-----------|--------|--------------|-------|-------|-------|-------|-------|-------|-------|-------|-------|-------|-------|-------|-------|
| RA28      | 9364   | NM_002429    | 10037 | 0.26  | 0.98  | -0.09 | 1.30  | 1.57  | 1.15  | -0.57 | 0.76  | -0.43 | 1.15  | 4.02  | -0.24 |
| PH2       | 5395   | NM_01018840  | 10038 | 0.47  | 0.62  | 0.11  | 0.69  | 0.32  | 1.13  | -0.20 | 0.11  | -0.34 | 1.29  | 2.18  | -0.24 |
| S100A10   | 6281   | NM_002966    | 10039 | 1.11  | 0.57  | 0.13  | 1.30  | 1.97  | 0.47  | -0.32 | -0.36 | 0.44  | 1.82  | 3.74  | -0.24 |
| CRVGD     | 1421   | NM_006891    | 10040 | 0.15  | -0.12 | 0.10  | 1.64  | 0.39  | -0.07 | -0.56 | -0.32 | 0.65  | 0.13  | 1.95  | -0.24 |
| SCD1      | 23256  | NM_182825    | 10041 | 1.63  | 2.00  | 3.75  | 3.27  | 0.73  | 3.29  | -0.31 | 0.34  | -0.27 | 5.99  | 7.28  | -0.24 |
| CH1       | 1538   | NM_0118      | 10042 | 0.09  | 0.12  | 0.18  | 0.28  | 0.15  | 0.22  | -0.15 | 0.22  | 0.18  | 0.10  | 0.05  | -0.24 |
| MGC10198  | 201965 | NM_152682    | 10043 | -0.23 | -0.15 | -0.31 | -0.72 | 0.13  | -0.42 | -0.06 | -0.33 | 0.15  | -0.69 | -1.01 | -0.24 |
| EXTL2     | 2135   | NM_001038025 | 10044 | -0.77 | -1.00 | -0.79 | -0.84 | -1.06 | -0.13 | 0.30  | -0.06 | -0.48 | -2.57 | -2.03 | -0.24 |
| NR13      | 9970   | NM_005512    | 10045 | 0.20  | 0.37  | 0.18  | 0.18  | 0.39  | 0.12  | -0.18 | 0.39  | 0.12  | 0.10  | 1.35  | -0.24 |
| BPGM      | 669    | NM_001724    | 10046 | 0.57  | 0.13  | 1.08  | 0.25  | 2.19  | 1.94  | 0.14  | -0.48 | 0.11  | 1.78  | 4.38  | -0.24 |
| LR3R      | 149233 | NM_144701    | 10047 | -0.25 | -0.88 | -0.28 | -0.32 | -0.24 | -0.50 | -0.09 | -0.46 | 0.31  | -1.42 | -1.07 | -0.24 |
| RTN2      | 6236   | NM_006901    | 10048 | -0.51 | -0.69 | 0.11  | -0.51 | -0.69 | 0.11  | -0.51 | -0.69 | 0.11  | -0.51 | -0.69 | -0.24 |
| BRAD      | 6236   | NM_004165    | 10049 | 0.31  | 0.08  | 0.00  | -0.30 | -0.82 | 0.24  | -0.16 | -0.13 | 0.05  | -0.40 | -1.35 | -0.24 |
| SERF2     | 10169  | NM_001018108 | 10050 | -0.47 | 0.32  | -0.23 | 0.94  | 0.98  | 0.15  | -0.57 | 0.39  | -0.06 | -0.38 | 1.77  | -0.24 |
| PFRS      | 5802   | NM_130653    | 10051 | 0.88  | 0.06  | -0.17 | 0.56  | 0.98  | 1.01  | 0.08  | -0.01 | -0.31 | 0.78  | 2.54  | -0.24 |
| NSC       | 341676 | NM_190289    | 10052 | 1.18  | 0.70  | 0.42  | 1.52  | 1.17  | 0.73  | 0.18  | 0.25  | 0.66  | 2.30  | 3.42  | -0.24 |
| C14ORF114 | 55218  | NM_018199    | 10053 | -0.38 | -1.72 | -0.84 | -1.36 | -3.10 | -1.53 | 0.26  | -0.69 | 0.19  | -2.94 | -5.99 | -0.24 |
| TM1       | 8711   | NM_003985    | 10054 | 0.30  | -0.12 | -0.32 | 0.23  | 0.02  | 0.23  | -0.11 | 0.08  | -0.21 | -0.14 | 0.47  | -0.24 |
| AR4C      | 10322  | NM_005737    | 10055 | -0.07 | 0.15  | 0.01  | 0.20  | 0.00  | -0.04 | -0.15 | 0.21  | -0.29 | 0.09  | 0.16  | -0.24 |
| FLJ10884  | 54596  | NM_019079    | 10056 | 0.25  | 0.80  | 1.67  | 0.74  | -0.04 | 1.38  | -0.65 | 0.39  | 0.02  | 2.72  | 1.88  | -0.24 |
| KMA1287   | 57038  | NM_020748    | 10057 | 0.38  | 0.77  | 0.85  | 1.77  | 1.18  | 1.40  | -0.42 | 0.07  | 0.11  | 2.00  | 4.35  | -0.24 |
| FLJ4305   | 40823  | NM_207468    | 10058 | 1.33  | -0.02 | 0.69  | 0.78  | 0.15  | 1.39  | 0.15  | -0.15 | -0.24 | 2.00  | 2.32  | -0.24 |
| QPS       | 11339  | NM_007280    | 10059 | 0.57  | 0.03  | 0.83  | -0.25 | 1.44  | 0.76  | -0.04 | -0.35 | 0.15  | 1.43  | 1.95  | -0.24 |
| CUL48     | 8450   | NM_003588    | 10060 | -0.37 | -0.11 | 0.75  | 0.88  | 0.27  | 0.10  | -0.72 | -0.27 | 0.74  | 0.27  | 1.25  | -0.24 |
| CDORF36   | 55251  | NM_018257    | 10061 | 0.31  | 0.10  | -0.45 | 0.98  | 1.64  | 0.28  | 0.42  | -0.58 | -0.09 | -0.04 | 2.91  | -0.24 |
| MAD2L1    | 4082   | NM_002358    | 10062 | -0.80 | -0.73 | -1.05 | -0.03 | 1.38  | 0.79  | 0.33  | -0.54 | 0.01  | -2.58 | 2.14  | -0.24 |
| CHEK2     | 11200  | NM_145862    | 10063 | 0.34  | 1.74  | 0.70  | 2.69  | 1.67  | 1.79  | -0.42 | 0.39  | -0.21 | 2.78  | 6.15  | -0.24 |
| CRABP2    | 1382   | NM_001878    | 10064 | 0.69  | -0.31 | -0.33 | -0.80 | -0.80 | -0.27 | 0.69  | -0.03 | -0.90 | 0.05  | -1.34 | -0.24 |
| HRRL1     | 552    | NM_018240    | 10065 | 0.83  | -0.10 | -0.28 | 0.42  | -0.10 | -0.28 | 0.42  | -0.10 | -0.28 | -1.20 | 1.61  | -0.24 |
| LOVL1     | 79993  | NM_024930    | 10066 | -0.47 | -0.53 | -0.78 | -0.19 | -0.62 | -0.92 | 0.18  | -0.18 | -0.25 | -1.77 | -1.74 | -0.24 |
| MGC35274  | 256886 | NM_153374    | 10067 | -0.25 | 0.05  | -0.27 | -0.32 | -0.01 | -0.22 | -0.25 | 0.20  | -0.20 | -0.47 | -0.55 | -0.25 |
| NSD4L     | 2347   | NM_001877    | 10068 | 1.28  | 0.99  | 0.48  | 0.68  | 1.28  | 0.99  | 0.48  | 0.68  | 1.28  | 0.99  | 0.48  | -0.25 |
| TGFR3     | 7943   | NM_003239    | 10069 | -0.20 | -1.16 | -0.91 | -1.39 | -0.90 | -1.46 | 0.42  | -0.44 | -0.23 | -2.75 | -3.75 | -0.25 |
| PGBD3     | 267004 | NM_170753    | 10070 | -0.63 | -0.03 | -0.12 | -0.97 | 0.00  | -0.35 | -0.18 | -0.12 | 0.05  | -0.78 | -1.32 | -0.25 |
| DN141     | 7790   | NM_003441    | 10071 | 0.67  | -1.26 | -1.10 | -0.89 | -0.16 | -0.33 | 1.60  | -1.02 | -0.83 | -1.70 | 0.40  | -0.25 |
| SLC38A8   | 64416  | NM_021544    | 10072 | 0.44  | 0.60  | 0.00  | 0.64  | 0.60  | 0.00  | 0.52  | 0.40  | 0.00  | 1.23  | 1.58  | -0.25 |
| PPIA1     | 8500   | NM_177423    | 10073 | -0.35 | 0.02  | -0.38 | -0.18 | -0.58 | -0.62 | -0.36 | 0.22  | -0.10 | -0.71 | -1.37 | -0.25 |
| MGC6885   | 347733 | NM_178012    | 10074 | 0.11  | 0.04  | -0.06 | -0.55 | -0.44 | 0.69  | 0.05  | 0.18  | -0.49 | 0.10  | -0.30 | -0.25 |
| LOC542826 | 64232  | NM_0280516   | 10075 | 0.47  | 0.19  | -0.09 | 0.41  | 0.19  | -0.09 | -0.52 | 0.41  | 0.19  | -0.52 | 0.41  | -0.25 |
| ADAMT54   | 9507   | NM_005099    | 10076 | -0.46 | -0.60 | 0.09  | -0.41 | 0.02  | -0.15 | 0.18  | -0.55 | 0.13  | -0.97 | -0.53 | -0.25 |
| SLC6A8    | 6535   | NM_005429    | 10077 | 0.81  | -0.22 | 0.02  | 0.23  | 0.10  | 0.68  | 0.37  | -0.06 | -0.56 | 0.61  | 1.01  | -0.25 |
| NCSTN     | 21395  | NM_010331    | 10078 | 0.65  | 0.78  | 0.05  | 0.65  | 0.78  | 0.05  | 0.65  | 0.78  | 0.05  | 0.65  | 0.78  | -0.25 |
| DEFB1058  | 504380 | NM_001040703 | 10079 | 1.22  | 0.66  | 0.51  | 1.04  | 1.12  | 1.15  | 0.63  | -0.53 | -0.35 | 2.40  | 3.31  | -0.25 |
| PAPPA2    | 60676  | NM_021936    | 10080 | -0.37 | -0.47 | 0.19  | -0.36 | 0.29  | 0.18  | -0.04 | -0.41 | 0.20  | -0.65 | 0.11  | -0.25 |
| TRM37     | 4591   | NM_00105207  | 10081 | 0.37  | -0.47 | -0.68 | -0.14 | -0.24 | -0.49 | 0.58  | -0.32 | -0.51 | -0.76 | 0.11  | -0.25 |
| RI16R     | 8168   | NM_00104064  | 10082 | 0.26  | 0.36  | 0.28  | 0.08  | 0.26  | 0.36  | 0.28  | 0.08  | 0.26  | 0.36  | 0.28  | -0.25 |
| DUG1      | 1739   | NM_004087    | 10083 | 0.15  | 0.34  | -0.21 | 0.57  | -0.43 | 0.04  | -0.17 | 0.15  | -0.23 | 0.28  | 0.10  | -0.25 |
| C13ORF17  | 125488 | NM_153211    | 10084 | 1.37  | 0.37  | 0.45  | 0.91  | 1.64  | 1.17  | 0.53  | -0.48 | -0.30 | 2.18  | 3.73  | -0.25 |
| NHS       | 481    | NM_198270    | 10085 | -0.19 | -0.20 | 0.01  | 0.19  | -0.20 | 0.01  | -0.19 | -0.20 | 0.01  | -0.19 | -0.20 | -0.25 |
| MGC3101   | 79007  | NM_024043    | 10086 | -1.07 | 0.37  | -0.71 | 0.74  | 0.18  | 0.60  | -1.01 | 1.14  | -0.38 | -1.41 | 1.52  | -0.25 |
| RHEBL1    | 121268 | NM_144939    | 10087 | 2.31  | 1.77  | 0.39  | 1.54  | 1.39  | 1.43  | 0.21  | 0.01  | -0.47 | 4.47  | 4.37  | -0.25 |
| DDX4      | 5458   | NM_001415    | 10088 | -0.25 | -0.06 | -0.28 | -0.65 | -0.44 | -0.65 | -0.25 | -0.06 | -0.28 | -0.65 | -0.44 | -0.25 |
| NLN       | 57486  | NM_002726    | 10089 | 0.93  | 0.43  | -0.21 | 0.82  | 0.86  | 1.30  | 0.23  | 0.02  | -0.51 | 2.29  | 2.97  | -0.25 |
| DOCK2     | 1794   | NM_004946    | 10090 | -0.13 | 0.59  | -0.41 | 1.52  | 0.72  | 0.29  | 0.07  | -0.11 | -0.22 | 0.05  | 2.54  | -0.25 |
| APFB2C2   | 10936  | NM_006789    | 10091 | 1.28  | 1.24  | 1.84  | 1.19  | 1.64  | 1.35  | -0.08 | -0.32 | 0.14  | 4.36  | 4.17  | -0.25 |
| AP31372   | 37062  | NM_150631    | 10092 | 0.21  | 0.24  | 0.00  | 0.21  | 0.24  | 0.00  | 0.21  | 0.24  | 0.00  | 0.21  | 0.24  | -0.25 |
| CD14      | 929    | NM_000591    | 10093 | 0.40  | -0.31 | -0.18 | 0.24  | 0.18  | -0.08 | 0.01  | 0.14  | -0.40 | 0.54  | 0.34  | -0.25 |
| FLJ2326   | 144717 | NM_144671    | 10094 | -0.64 | -0.06 | -1.40 | -0.56 | -0.93 | -0.37 | -0.32 | 0.64  | -0.57 | -2.20 | -1.86 | -0.25 |
| PKNO2     | 60876  | NM_021935    | 10095 | -0.17 | 0.31  | 0.11  | 0.61  | 0.88  | -0.17 | 0.31  | 0.11  | 0.61  | 0.88  | -0.17 | -0.25 |
| MGC5902   | 56902  | NM_001143    | 10096 | -1.33 | -1.42 | 1.62  | 0.40  | -0.47 | -0.08 | -0.98 | -1.19 | 1.91  | -1.12 | 0.79  | -0.26 |
| FMOS      | 2330   | NM_001461    | 10097 | -0.11 | 0.43  | -0.51 | 0.47  | 0.72  | 1.00  | -0.19 | 0.12  | -0.18 | -0.19 | 2.19  | -0.26 |
| MGC274    | 7880   | NM_001093    | 10098 | -1.17 | -1.09 | -1.39 | -1.63 | -1.95 | -1.54 | 0.28  | -0.16 | -0.39 | -1.64 | -5.12 | -0.26 |
| FLJ2541   | 64220  | NM_022369    | 10099 | 0.00  | 0.50  | 1.25  | 0.25  | -0.63 | 0.04  | -0.43 | 0.01  | 0.17  | 3.75  | 0.35  | -0.26 |
| SYCP1     | 6847   | NM_003176    | 10100 | 0.29  | 0.02  | 0.41  | 1.05  | 0.71  | -0.25 | -0.42 | -0.39 | 0.56  | 0.71  | 1.51  | -0.26 |
| RHO2      | 51320  | NM_016226    | 10101 | -0.23 | 0.44  | 0.23  | 0.08  | -0.02 | 0.00  | -0.51 | 0.26  | -0.01 | 0.35  | 0.06  | -0.26 |
| NR01      | 3082   | NM_004296    | 10102 | 1.20  | 1.79  | 0.66  | 0.08  | 0.31  | 0.66  | 0.08  | 0.31  | 0.66  | 0.08  | 0.31  | -0.26 |
| FCGR1A    | 2209   | NM_000566    | 10103 | -0.39 | -0.28 | -0.57 | -0.31 | -0.03 | 0.74  | -0.08 | 0.46  | -0.64 | -1.13 | 0.40  | -0.26 |
| RPS4Y1    | 6192   | NM_001008    | 10104 | 0.99  | -1.43 | -1.43 | -1.16 | -2.40 | -1.55 | -0.25 | 0.08  | -0.06 | -3.85 | -5.11 | -0.26 |
| TRMPS12   | 20345  | NM_0010559   | 10105 | 0.60  | 0.02  | 0.00  | 0.60  | 0.02  | 0.00  | 0.60  | 0.02  | 0.00  | 0.60  | 0.02  | -0.26 |
| LOC51321  | 51321  | NM_001033572 | 10106 | -0.03 | -0.24 | -0.34 | -0.17 | 0.22  | 0.17  | 0.06  | -0.13 | -0.19 | -0.55 | -0.22 | -0.26 |
| CBORF1    | 734    | NM_004337    | 10107 | 1.76  | 0.73  | 0.38  | 0.95  | 0.92  | 0.65  | 0.34  | -0.28 | -0.32 | 2.87  | 2.52  | -0.26 |
| IL13      | 3356   | NM_001488    | 10108 | -0.15 | 0.22  | 0.39  | 0.16  | 0.66  | 0.13  | -0.20 | 0.66  | 0.13  | -0.20 | 0.66  | -0.26 |
| LOC30333  | 90333  | NM_001008801 | 10109 | 0.89  | 0.52  | 0.31  | -0.16 | 0.35  | 0.75  | -0.69 | 0.58  | -0.15 | 0.06  | 0.23  | -0.26 |
| LOC137886 | 137886 | NM_001072619 | 10110 | -0.03 | -0.45 | -0.43 | -0.84 | -0.88 | -0.42 | 0.25  | -0.30 | -0.21 | -0.91 | -1.24 | -0.26 |
| MTST      | 116449 | NM_025264    | 10111 | -0.20 | 0.15  | 0.05  | 0.05  | -0.12 | 0.03  | -0.21 | -0.19 | 0.14  | -0.10 | -0.04 | -0.26 |
| ZNF87     | 84914  | NM_032828    | 10112 | 0.86  | 0.05  | 0.59  | 0.41  | 0.47  | 0.46  | 0.11  | 0.37  | 1.39  | 1.25  | 0.26  | -0.26 |
| C13ORF152 | 90050  | NM_138344    | 10113 | -0.67 | -0.62 | -1.10 | -1.63 | -1.39 | -1.52 | -0.05 | 0.31  | -0.51 | -2.39 | -4.54 | -0.26 |
| FLJ4061   | 256949 | NM_198471    | 10114 | -0.05 | -0.30 | -0.44 | -0.15 | -0.84 | -0.19 | -0.20 | 0.26  | -0.32 | -0.78 | -0.81 | -0.26 |
| CCORF129  | 154657 | NM_001493    | 10115 | 0.68  | 0.84  | 0.84  | -1.43 | -1.21 | -1.36 | 0.22  | -0.16 | -0.32 | 1.71  | 2.12  | -0.26 |
| DNFBF8    | 4714   | NM_005004    | 10116 | -0.66 | -0.65 | -0.44 | -0.36 | -0.53 | -0.69 | -0.20 | 0.    |       |       |       |       |

|           |        |             |       |       |       |       |       |       |       |       |       |       |       |       |       |
|-----------|--------|-------------|-------|-------|-------|-------|-------|-------|-------|-------|-------|-------|-------|-------|-------|
| SEPRN2    | 5276   | NM_000217   | 10199 | 0.88  | 0.17  | -0.37 | 0.61  | 0.23  | 0.20  | 0.01  | -0.25 | -0.07 | 0.68  | 1.04  | -0.29 |
| TARSL1    | 12389  | NM_000234   | 10200 | 0.32  | 0.85  | 1.07  | 0.89  | -0.69 | 1.94  | 0.11  | -1.51 | 0.44  | 2.23  | 1.21  | -0.28 |
| TBM71     | 131405 | NM_00103911 | 10001 | -5.31 | 14.12 | 7.55  | 11.17 | 7.69  | 8.01  | -0.37 | 0.05  | 0.03  | 26.89 | 26.88 | 0.29  |
| MGC3121   | 78994  | NM_024031   | 10002 | -0.31 | -0.50 | -0.61 | -0.81 | -1.87 | 8.01  | -0.31 | 0.43  | -0.42 | -1.41 | -3.47 | -0.29 |
| FLI2804   | 199221 | NM_173543   | 10003 | -0.18 | -0.74 | 0.52  | -0.46 | -0.89 | -0.24 | -0.16 | -0.34 | 0.20  | -0.59 | -1.59 | -0.29 |
| WVNC02    | 9172   | NM_000970   | 10004 | 0.51  | 0.05  | -0.16 | 1.07  | 0.35  | 0.87  | -0.88 | -0.04 | 0.27  | 0.78  | 0.78  | -0.29 |
| SLC10A6   | 345274 | NM_197965   | 10005 | 0.09  | 0.60  | 0.58  | 0.70  | 0.24  | 0.76  | -0.23 | 0.09  | -0.16 | 1.27  | 1.69  | -0.29 |
| MZDFP     | 152538 | NM_152995   | 10006 | -1.20 | 1.16  | 0.91  | 1.08  | 1.08  | 1.70  | 0.13  | -0.08 | -0.34 | 3.27  | 3.86  | -0.29 |
| DNK       | 8562   | NM_030377   | 10007 | 0.05  | 0.20  | 0.18  | 0.10  | 0.39  | 0.10  | 0.39  | 0.10  | 0.39  | 0.10  | 0.39  | -0.29 |
| GN68      | 94235  | NM_033258   | 10008 | -0.96 | 0.03  | -0.72 | -1.02 | -1.12 | -0.44 | -0.51 | 0.64  | -0.43 | -1.71 | -2.58 | -0.30 |
| FLI2452   | 93958  | NM_144576   | 10009 | -1.16 | -0.87 | -0.70 | -1.28 | -0.41 | -0.78 | -0.28 | -0.38 | 0.37  | -0.73 | -2.48 | -0.30 |
| TNEM889   | 40695  | NM_0400869  | 10010 | 0.12  | -0.37 | 0.70  | -0.12 | -0.19 | 0.27  | -0.12 | -0.19 | 0.27  | -0.24 | -1.01 | -0.30 |
| RPK       | 22902  | NM_00107442 | 10011 | 1.51  | 0.10  | -0.09 | 0.39  | 0.65  | 0.27  | 0.52  | -0.41 | -0.41 | 1.51  | 1.31  | -0.30 |
| KCN53     | 3790   | NM_002252   | 10012 | -1.38 | -1.40 | -1.57 | -2.27 | -1.97 | -1.65 | 0.70  | -0.25 | -0.75 | -4.31 | -5.89 | -0.30 |
| SLC22A11  | 55867  | NM_018484   | 10013 | 1.04  | 0.43  | -0.12 | 0.66  | 0.86  | 0.33  | 0.26  | -0.27 | -0.29 | 1.39  | 1.85  | -0.30 |
| GLR8      | 2781   | NM_000824   | 10014 | -0.02 | 0.18  | 0.02  | -0.42 | -0.14 | -0.25 | -0.11 | 0.09  | -0.20 | 0.18  | -0.81 | -0.30 |
| RNF125    | 54941  | NM_017831   | 10015 | 0.24  | 0.31  | 0.25  | 0.77  | 0.17  | 0.36  | -0.40 | 0.24  | -0.14 | 0.80  | 1.29  | -0.30 |
| CASP4     | 837    | NM_001225   | 10016 | -0.13 | -0.46 | -0.49 | 0.16  | -0.65 | -1.02 | -0.21 | 0.32  | 0.24  | -1.09 | -1.51 | -0.30 |
| PS        | 2158   | NM_000132   | 10017 | 0.26  | 0.76  | -0.57 | 0.04  | 0.42  | 0.01  | 1.21  | -0.85 | -0.76 | -2.37 | 0.46  | -0.30 |
| PLA2G12A  | 81579  | NM_030821   | 10018 | -0.48 | -0.29 | 0.70  | -0.03 | -0.22 | 0.24  | 0.13  | -0.51 | 0.08  | 0.89  | 0.00  | -0.30 |
| ZNF382    | 84911  | NM_032825   | 10019 | 0.08  | -0.81 | -0.76 | -0.68 | -1.13 | -0.80 | 0.21  | -0.60 | 0.09  | -1.66 | -2.61 | -0.30 |
| PRAR4     | 5485   | NM_032644   | 10020 | -1.22 | -0.51 | 1.28  | 2.26  | 1.38  | 1.49  | -0.80 | 0.34  | 0.16  | -0.45 | -1.14 | -0.30 |
| FLI3031   | 168455 | NM_175884   | 10021 | -1.19 | 0.58  | -0.49 | -0.45 | 0.25  | -0.23 | 0.22  | -0.07 | -0.45 | 0.11  | -0.43 | -0.30 |
| LOC112703 | 112703 | NM_138411   | 10022 | 2.30  | 0.18  | 1.19  | 1.81  | 2.14  | 1.26  | 0.27  | -0.84 | 0.27  | 3.67  | 5.20  | -0.30 |
| CASP6     | 839    | NM_012992   | 10023 | 0.49  | 0.52  | 0.52  | 0.12  | 1.07  | 0.31  | -0.24 | -0.28 | 0.22  | 1.51  | 1.70  | -0.30 |
| ADPP      | 364    | NM_001170   | 10024 | 1.49  | 0.91  | 0.37  | 1.39  | 1.06  | 1.95  | 0.03  | 0.30  | 0.64  | 2.77  | 4.41  | -0.30 |
| SLC1A7    | 6512   | NM_006071   | 10025 | 0.75  | 0.29  | 0.52  | 0.67  | 0.07  | 0.68  | -0.13 | 0.01  | -0.18 | 1.56  | 1.43  | -0.30 |
| POG2      | 11232  | NM_007215   | 10026 | -0.88 | 0.26  | 0.16  | 0.21  | 0.29  | 0.53  | -0.25 | -0.09 | 0.01  | -0.26 | 1.03  | -0.30 |
| DHXC2     | 2287   | NM_136514   | 10027 | 1.12  | 0.18  | 0.56  | 0.17  | 0.69  | 0.18  | -0.17 | 0.08  | 0.11  | 0.34  | 0.99  | -0.30 |
| RNF170    | 81790  | NM_030954   | 10028 | 2.99  | 1.78  | 2.16  | 2.75  | 1.80  | 0.08  | 0.07  | -0.32 | -0.05 | 7.04  | 4.63  | -0.30 |
| ZC3HC8    | 84524  | NM_032494   | 10029 | 0.33  | -0.81 | -0.54 | -0.25 | -0.60 | -0.83 | -0.01 | 0.08  | -0.37 | -1.03 | -1.68 | -0.30 |
| BEHE      | 7851   | NM_032424   | 10030 | -0.57 | -0.49 | -0.64 | -0.35 | -0.68 | -0.44 | -0.35 | -0.68 | -0.44 | -1.74 | -2.69 | -0.30 |
| KUAI128   | 85461  | NM_033394   | 10031 | 0.45  | 0.23  | 0.13  | 0.94  | -0.76 | 0.81  | 0.42  | 0.12  | 0.00  | 0.53  | 0.99  | -0.30 |
| ACOX1     | 51     | NM_007292   | 10032 | 1.07  | 0.09  | 0.26  | 0.37  | 0.35  | 0.52  | -0.01 | -0.13 | -0.16 | 1.24  | 1.25  | -0.30 |
| KUL12     | 93948  | NM_012633   | 10033 | 0.10  | 0.03  | 0.07  | 0.09  | 0.20  | 0.30  | -0.35 | -0.29 | 0.34  | 0.20  | -0.01 | -0.30 |
| FLI1144   | 64789  | NM_022774   | 10034 | -0.47 | 0.75  | 0.71  | -0.24 | -1.09 | -0.61 | 0.21  | -0.62 | -0.26 | 2.06  | 2.96  | -0.30 |
| SOX18     | 54345  | NM_018419   | 10035 | -0.67 | -0.02 | 0.56  | 0.33  | -0.07 | -0.24 | -0.68 | -0.16 | 0.54  | -0.13 | 0.01  | -0.30 |
| ORH21     | 26716  | NM_030883   | 10036 | -0.06 | 0.20  | 0.94  | -0.54 | -0.42 | 0.45  | -0.25 | -0.08 | 0.02  | 1.08  | -0.52 | -0.30 |
| MGC40845  | 83687  | NM_032345   | 10037 | 0.66  | 0.15  | 0.68  | 0.15  | 0.68  | 0.15  | 0.68  | 0.15  | 0.68  | 0.15  | 0.68  | -0.30 |
| FLI3790   | 157769 | NM_144963   | 10038 | -0.50 | 0.44  | -0.29 | -0.25 | -0.38 | 0.01  | -0.45 | 0.31  | -0.17 | -0.36 | -0.62 | -0.30 |
| KP1750    | 162405 | NM_181535   | 10039 | -1.13 | -0.69 | -0.57 | -1.16 | -1.22 | -1.00 | -0.13 | -0.19 | 0.01  | -2.40 | -3.37 | -0.30 |
| PCOHD3    | 6488   | NM_032863   | 10040 | 0.73  | 0.83  | 0.86  | 0.73  | 0.83  | 0.86  | 0.73  | 0.83  | 0.86  | 0.73  | 0.83  | -0.30 |
| FLI2031   | 54897  | NM_017766   | 10041 | -1.07 | -0.25 | -0.74 | -0.92 | -1.0  | -0.58 | -0.35 | -0.16 | 0.20  | -2.46 | -1.61 | -0.31 |
| ZNF213    | 7760   | NM_004220   | 10042 | 0.10  | 1.30  | -0.06 | 0.85  | 0.56  | 0.81  | -0.17 | 0.27  | -0.40 | 1.33  | 2.21  | -0.31 |
| ZFVE1     | 53498  | NM_17841    | 10043 | -0.62 | -0.52 | -0.96 | -0.72 | -1.05 | -0.55 | -1.18 | 0.04  | -0.17 | -2.04 | -2.33 | -0.31 |
| BPMS      | 63     | NM_021073   | 10044 | 1.19  | 1.15  | 1.27  | 0.88  | 0.67  | 0.88  | 0.67  | 0.88  | 0.67  | 2.62  | 3.97  | -0.31 |
| PLXNA3    | 55558  | NM_017514   | 10045 | 0.00  | 0.14  | 0.73  | 1.32  | 1.92  | 2.51  | -0.23 | 0.06  | -0.14 | 0.87  | 5.75  | -0.31 |
| RNF8P1    | 80762  | NM_030971   | 10046 | 0.34  | 0.26  | 0.64  | 0.06  | 0.59  | 0.83  | 0.20  | -0.43 | -0.06 | 1.24  | 1.47  | -0.31 |
| NSM31     | 21842  | NM_021042   | 10047 | 0.28  | -0.07 | 0.75  | 0.28  | -0.07 | 0.75  | 0.28  | -0.07 | 0.75  | 0.28  | -0.07 | -0.31 |
| MGC13045  | 84304  | NM_00118612 | 10048 | 1.00  | 0.78  | -0.51 | 0.57  | 0.59  | 1.35  | 0.16  | 0.43  | -0.90 | 3.28  | 2.51  | -0.31 |
| ORIG2     | 81470  | NM_00100193 | 10049 | -0.40 | -0.18 | 0.22  | 0.01  | -0.55 | 0.12  | 0.03  | -0.07 | -0.27 | -0.36 | -0.42 | -0.31 |
| PTST      | 8498   | NM_020596   | 10050 | 0.57  | 0.87  | 0.87  | 0.12  | 0.57  | 0.87  | 0.87  | 0.12  | 0.57  | 0.87  | 0.87  | -0.31 |
| ZNF265    | 10781  | NM_198058   | 10051 | 0.55  | 0.23  | -0.42 | 0.33  | -0.14 | -0.25 | -0.01 | 0.08  | -0.38 | 0.37  | 0.44  | -0.31 |
| ZF789E    | 374886 | NM_198549   | 10052 | 0.08  | 0.69  | 0.09  | 0.18  | 0.25  | -0.34 | -0.19 | -0.16 | 0.04  | 0.86  | 0.09  | -0.31 |
| FLI2675   | 88856  | NM_00101668 | 10053 | 0.80  | 0.49  | 0.95  | 0.44  | 0.62  | 1.69  | -0.16 | -0.03 | -0.12 | 2.25  | 2.72  | -0.31 |
| FRWS      | 5446   | NM_176216   | 10054 | 0.91  | 0.41  | 0.75  | 0.41  | 0.75  | 0.41  | 0.75  | 0.41  | 0.75  | 0.41  | 0.75  | -0.31 |
| LOC91661  | 91661  | NM_00104085 | 10055 | -0.21 | 0.09  | -0.14 | -0.15 | -0.54 | -0.21 | -0.20 | 0.05  | -0.16 | -0.26 | -0.89 | -0.31 |
| KUAI1277  | 27147  | NM_015689   | 10056 | -0.59 | 0.47  | -0.17 | 0.58  | 0.08  | 0.27  | -0.72 | 0.40  | 0.01  | -0.29 | 0.59  | -0.31 |
| PHSL      | 34746  | NM_198510   | 10057 | 0.68  | 0.13  | 0.65  | 0.68  | 0.13  | 0.65  | 0.68  | 0.13  | 0.65  | 0.68  | 0.13  | -0.31 |
| MAK       | 4117   | NM_005906   | 10058 | -0.48 | 0.09  | 0.35  | 0.81  | 0.87  | 0.76  | 0.47  | -0.26 | 0.41  | -0.05 | 2.43  | -0.32 |
| FLI2055   | 54868  | NM_017728   | 10059 | 0.08  | -0.95 | -0.73 | -0.99 | 0.70  | 0.75  | 0.71  | -0.75 | -0.28 | -1.60 | -1.04 | -0.32 |
| MGC11539  | 85870  | NM_032927   | 10060 | -0.17 | 0.15  | 0.77  | -0.14 | -0.19 | 0.49  | -0.35 | 0.24  | -0.03 | 0.74  | 0.64  | -0.32 |
| UNGS121   | 88851  | NM_207397   | 10061 | 0.85  | 1.09  | -1.07 | -1.51 | -1.82 | -1.52 | 0.09  | -0.47 | 0.06  | -3.01 | -4.86 | -0.32 |
| LOC40451  | 40451  | NM_207446   | 10062 | -0.07 | -0.36 | -1.19 | -0.52 | -0.49 | -0.34 | -0.16 | 0.63  | -0.79 | -1.62 | -1.35 | -0.32 |
| GABARAP   | 11337  | NM_007378   | 10063 | 0.36  | 0.30  | -0.15 | 0.57  | 0.12  | -0.02 | 0.04  | -0.07 | -0.29 | 0.52  | 0.67  | -0.32 |
| MGC48888  | 148888 | NM_00100886 | 10064 | 0.27  | 0.37  | 0.18  | 0.32  | 0.22  | 0.10  | 0.35  | -0.02 | 0.12  | 0.35  | 0.18  | -0.32 |
| SMARCAL1  | 50485  | NM_014140   | 10065 | 0.57  | 0.68  | -0.41 | 0.56  | 0.26  | 1.51  | 0.03  | 0.10  | -0.45 | 0.84  | 2.33  | -0.32 |
| JARP      | 23367  | NM_015135   | 10066 | 0.72  | 1.87  | 3.96  | 1.30  | 1.77  | 1.37  | -0.56 | -0.29 | 0.53  | 5.56  | 4.43  | -0.32 |
| TR14      | 2118   | NM_001096   | 10067 | 0.04  | 0.04  | 0.25  | 0.56  | 1.64  | 1.69  | 0.45  | 0.16  | 0.73  | 1.27  | 1.43  | -0.32 |
| SHOC2     | 8036   | NM_007373   | 10068 | 0.55  | -0.33 | 0.23  | -0.01 | 0.21  | -0.30 | -0.09 | -0.62 | 0.38  | 0.45  | -0.10 | -0.32 |
| KMA2022   | 34033  | NM_00100837 | 10069 | -0.52 | 0.49  | 0.11  | -0.50 | -0.12 | 0.62  | -0.45 | 0.68  | -0.55 | 0.08  | 0.01  | -0.32 |
| ZF789E    | 257    | NM_00100837 | 10070 | -0.18 | -0.69 | 0.49  | -0.69 | -0.69 | 0.42  | -0.69 | -0.69 | 0.42  | -1.78 | -2.61 | -0.32 |
| RALP      | 39994  | NM_203349   | 10071 | 0.32  | 0.57  | 0.27  | 1.31  | 1.41  | 0.28  | -0.58 | 0.10  | 0.37  | 1.17  | 2.99  | -0.32 |
| PPR35D    | 5528   | NM_180977   | 10072 | 0.67  | 0.45  | -0.48 | -0.19 | -0.04 | -0.41 | -0.14 | -0.21 | 0.04  | -1.21 | -0.64 | -0.32 |
| PP2P      | 54477  | NM_019612   | 10073 | -0.25 | 0.33  | 0.45  | 2.50  | 2.24  | 2.77  | 0.01  | -0.26 | -0.06 | 1.41  | 7.51  | -0.32 |
| ZC3K1AP   | 22950  | NM_032158   | 10074 | 0.56  | 0.16  | 0.02  | 0.18  | 0.41  | 0.10  | -0.35 | 0.44  | 0.10  | 0.70  | 0.78  | -0.32 |
| MGC17943  | 90488  | NM_152261   | 10075 | 0.37  | -0.57 | 0.28  | -0.55 | -0.27 | -0.25 | 0.01  | -0.71 | 0.37  | -0.66 | -1.08 | -0.32 |
| ELVS      | 25909  | NM_015446   | 10076 | -0.32 | 0.42  | -0.09 | 0.02  | 0.47  | 0.28  | 0.01  | 0.12  | -0.45 | 0.65  | 0.76  | -0.32 |
| DF2       | 597    | NM_005268   | 10077 | 1.28  | 1.25  | 1.67  | 1.28  | 1.25  | 1.67  | 1.28  | 1.25  | 1.67  | 1.28  | 1.25  | -0.32 |
| RH1       | 10692  | NM_006583   | 10078 | 2.42  | 1.45  | -0.08 | 1.58  | 0.15  | 1.00  | -0.0  |       |       |       |       |       |



|             |        |              |       |       |       |       |       |       |       |       |       |       |       |       |       |
|-------------|--------|--------------|-------|-------|-------|-------|-------|-------|-------|-------|-------|-------|-------|-------|-------|
| TFG         | 10342  | NM_001007565 | 10361 | -0.81 | -0.21 | -1.02 | 0.06  | 0.42  | 0.47  | 0.15  | 0.04  | 0.54  | -2.05 | 0.95  | -0.35 |
| EPCC1       | 26122  | NM_002008000 | 10362 | -0.17 | -0.17 | -0.23 | 0.51  | -0.17 | 0.23  | -0.19 | 0.24  | -0.51 | -1.00 | 0.58  | -0.25 |
| MGC3114     | 84326  | NM_001040611 | 10363 | 0.63  | -0.99 | -0.64 | -1.31 | -0.90 | -1.03 | 0.04  | -0.44 | 0.04  | 2.26  | -3.25 | -0.35 |
| MPCAL4      | 51440  | NM_016257    | 10364 | 0.37  | -0.10 | 0.10  | 0.52  | 0.63  | 0.43  | -0.37 | -0.22 | 0.24  | 0.37  | 1.57  | -0.35 |
| GFY0W       | 27238  | NM_015058    | 10365 | -0.66 | -0.28 | -1.40 | -0.06 | -2.08 | 1.50  | -0.25 | -0.20 | 0.10  | -2.34 | -0.64 | -0.35 |
| FC1D        | 1540   | NM_0036247   | 10366 | 0.49  | 0.44  | 0.49  | 0.49  | 1.43  | 0.60  | -0.39 | 0.06  | 0.00  | 2.23  | 6.18  | -0.35 |
| BCL2L1      | 598    | NM_001191    | 10367 | -1.22 | -1.20 | -1.11 | -1.13 | -1.46 | -1.30 | -0.58 | 0.43  | -0.20 | -3.53 | -3.89 | -0.36 |
| KBTR06      | 89890  | NM_152903    | 10368 | 0.77  | 0.01  | -0.39 | 0.00  | 0.44  | 0.07  | 0.27  | -0.12 | -0.51 | 0.38  | 0.51  | -0.36 |
| LOC201181   | 201181 | NM_001013024 | 10369 | -0.54 | 0.13  | -0.70 | 0.54  | 0.13  | -0.70 | -0.12 | 0.18  | -0.36 | 2.89  | 2.51  | -0.36 |
| IRAK3       | 11213  | NM_007199    | 10370 | -0.52 | 0.02  | -0.46 | -0.69 | -0.27 | -0.62 | -0.17 | -0.04 | -0.15 | -0.96 | -1.59 | -0.36 |
| MF12        | 4241   | NM_033116    | 10371 | 0.32  | 0.32  | 0.14  | -0.30 | -0.02 | -0.44 | -0.27 | 0.07  | -0.16 | -0.14 | -0.76 | -0.36 |
| 1851NFP     | 1851   | NM_0013403   | 10372 | 0.07  | -0.07 | -0.06 | 0.07  | 0.75  | 0.27  | 0.75  | 0.27  | -0.23 | 0.92  | 1.97  | -0.36 |
| CC128       | 56477  | NM_148672    | 10373 | 0.05  | 0.15  | -0.26 | -0.24 | 0.30  | 0.07  | -0.06 | -0.05 | -0.25 | -0.13 | -0.36 | -0.36 |
| BAGAL74     | 8702   | NM_003778    | 10374 | -0.07 | 0.33  | 0.54  | -0.07 | 0.16  | 0.26  | 0.34  | -0.02 | 0.00  | 0.44  | 0.35  | -0.36 |
| NBP1        | 9683   | NM_153029    | 10375 | 0.30  | -0.58 | 0.43  | -0.28 | -0.36 | -0.33 | -0.47 | -0.48 | 0.59  | -0.44 | -0.97 | -0.36 |
| PCD         | 5351   | NM_0000302   | 10376 | -0.29 | 0.08  | -0.39 | 0.16  | -0.41 | 0.58  | -0.33 | 0.25  | -0.28 | 0.76  | 0.33  | -0.36 |
| MGC11332    | 84804  | NM_003718    | 10377 | -0.50 | -0.33 | 0.32  | -0.36 | -0.13 | 0.07  | -0.16 | -0.26 | 0.06  | -0.51 | -0.42 | -0.36 |
| GASP        | 9737   | NM_014710    | 10378 | 0.61  | 0.29  | 0.31  | 1.69  | 0.86  | 1.74  | -0.08 | 0.06  | -0.34 | 1.21  | 4.29  | -0.36 |
| HST1141     | 8363   | NM_021968    | 10379 | -0.20 | -0.58 | -0.40 | -0.34 | -1.15 | -0.29 | 0.10  | -0.21 | -0.15 | -1.29 | 1.78  | -0.36 |
| KIAM459     | 23252  | NM_037567    | 10380 | 0.31  | -0.15 | 0.29  | 0.70  | 0.97  | 0.96  | 0.02  | -0.07 | -0.32 | 0.45  | 2.63  | -0.36 |
| CYP2C18     | 1562   | NM_000772    | 10381 | -0.86 | -0.69 | -0.87 | -1.48 | -1.55 | -0.81 | -0.04 | 0.07  | -0.38 | -2.42 | -3.84 | -0.36 |
| SEPP1N1     | 5274   | NM_0200525   | 10382 | -0.12 | -0.13 | -0.37 | 0.44  | 0.56  | 0.27  | -0.14 | 0.42  | -0.64 | -0.61 | -1.28 | -0.36 |
| CASP9       | 842    | NM_032996    | 10383 | -0.46 | -0.07 | -0.21 | -0.15 | 0.12  | 1.51  | 0.67  | -0.26 | -0.78 | 0.18  | 1.47  | -0.36 |
| NAT6        | 24142  | NM_012191    | 10384 | -0.67 | -0.79 | 0.01  | -0.34 | -0.78 | -1.00 | -0.62 | -0.12 | 0.38  | -1.45 | -2.12 | -0.36 |
| NMEM28      | 27132  | NM_015486    | 10385 | -0.17 | -0.29 | -0.29 | -0.59 | -0.16 | -0.12 | 0.41  | -0.44 | -0.34 | -0.42 | -0.87 | -0.36 |
| RKAD041     | 23800  | NM_015090    | 10386 | -0.34 | 0.01  | 0.06  | -0.09 | 0.08  | 0.24  | -0.13 | -0.31 | 0.08  | -0.27 | 0.23  | -0.36 |
| PAPSS2      | 9060   | NM_004670    | 10387 | -0.72 | -0.10 | 0.38  | 0.85  | 1.09  | 0.46  | -0.87 | 0.76  | -0.25 | -0.44 | 2.40  | -0.36 |
| ODC1C       | 4993   | NM_012268    | 10388 | -1.02 | 0.81  | 0.65  | 0.95  | 0.74  | 1.45  | -0.25 | 0.13  | -0.24 | 2.48  | 3.15  | -0.36 |
| HT111       | 5585   | NM_018472    | 10389 | 0.77  | 0.39  | 0.59  | 0.77  | 0.39  | 0.59  | 0.77  | 0.39  | 0.59  | 0.97  | 0.10  | -0.36 |
| NTRK2       | 4915   | NM_001018064 | 10390 | -0.42 | -0.88 | -1.25 | -0.58 | -0.63 | -0.92 | 0.29  | -0.23 | -0.42 | -2.55 | -2.13 | -0.36 |
| CALR3       | 125972 | NM_145046    | 10391 | -0.15 | -0.10 | -0.88 | -0.02 | -0.70 | -0.94 | -0.32 | -0.14 | -0.19 | -1.14 | -1.66 | -0.36 |
| CDNF7       | 11669  | NM_130708    | 10392 | 0.52  | 0.40  | 0.71  | 0.40  | 0.45  | 0.89  | 0.05  | 0.40  | 0.18  | 1.63  | 1.84  | -0.36 |
| ABPC3       | 10994  | NM_000719    | 10393 | -0.35 | 0.41  | 0.18  | -0.62 | 0.03  | 0.20  | -0.06 | -0.24 | -0.07 | -0.38 | -0.36 | -0.36 |
| UNC5C       | 8633   | NM_003728    | 10394 | 0.68  | 0.91  | 0.01  | -0.14 | -0.10 | -0.26 | 0.46  | -0.90 | 0.08  | -0.22 | 0.50  | -0.36 |
| LOC39013    | 90313  | NM_138349    | 10395 | -0.15 | -0.22 | 0.21  | 0.95  | -0.13 | 0.31  | -0.40 | -0.12 | -0.09 | -0.16 | 1.13  | -0.36 |
| FAPR1       | 10160  | NM_001019115 | 10396 | 0.21  | 0.53  | 0.40  | -0.16 | -0.15 | 0.16  | -0.32 | 0.40  | 0.16  | 0.16  | 0.16  | -0.36 |
| TOR3C       | 64784  | NM_022769    | 10397 | -0.16 | 0.05  | 0.47  | 0.31  | 0.22  | 0.16  | -0.29 | -0.37 | 0.29  | 0.36  | 0.69  | -0.37 |
| CASP7       | 840    | NM_033340    | 10398 | -0.16 | -0.18 | -0.71 | -0.02 | 0.01  | -0.69 | -0.38 | 0.20  | -0.19 | -1.05 | -0.70 | -0.37 |
| PCG1        | 9263   | NM_020926    | 10399 | 0.66  | 0.92  | -0.14 | 0.10  | 0.36  | 1.25  | -0.10 | 1.07  | 0.20  | 1.35  | 1.01  | -0.37 |
| NCLN        | 56926  | NM_020170    | 10400 | -0.25 | -1.18 | -0.77 | 0.38  | 1.00  | 0.61  | -0.89 | -1.10 | -0.24 | -1.70 | 2.00  | -0.37 |
| RPH3A       | 22895  | NM_014954    | 10401 | 0.63  | -0.05 | -0.10 | 0.17  | 0.53  | -0.62 | -0.89 | -0.21 | 0.73  | -0.79 | 0.07  | -0.37 |
| LOC4284     | 895    | NM_0050346   | 10402 | -0.31 | -0.34 | -0.10 | -0.79 | -0.08 | -0.25 | 0.04  | -0.34 | -0.31 | -0.44 | -0.33 | -0.37 |
| ADL3        | 38785  | NM_001002921 | 10403 | -1.02 | 0.21  | -0.07 | -0.06 | 0.03  | 0.00  | -0.18 | -0.32 | 0.13  | -1.29 | 0.02  | -0.37 |
| DKO         | 8528   | NM_004032    | 10404 | -1.28 | -0.50 | -0.66 | -0.92 | -0.35 | -0.71 | -0.77 | 0.51  | -0.11 | -2.45 | -1.99 | -0.37 |
| KDEL1C      | 79070  | NM_024089    | 10405 | 1.71  | 0.41  | 0.59  | 0.79  | 1.51  | 1.80  | -0.42 | -0.41 | -0.38 | 2.71  | 4.11  | -0.37 |
| ITC4        | 8372   | NM_014883    | 10406 | 0.02  | 0.15  | 0.18  | -0.02 | -0.20 | -0.20 | -0.02 | -0.02 | -0.02 | 0.35  | 0.07  | -0.37 |
| LOC126731   | 126731 | NM_145257    | 10407 | 0.27  | 0.20  | -0.21 | 1.27  | 0.85  | 2.48  | -0.34 | 0.64  | -0.67 | 2.62  | 4.60  | -0.37 |
| ABC29       | 10960  | NM_020298    | 10408 | 1.46  | 0.78  | 0.92  | 1.31  | 1.11  | 1.35  | 0.00  | -0.19 | -0.18 | 3.16  | 3.78  | -0.37 |
| PKNOX2      | 39043  | NM_001005051 | 10409 | -1.72 | -1.14 | -0.74 | -0.67 | -1.58 | -1.17 | -0.68 | -1.17 | -0.68 | -2.61 | -2.54 | -0.37 |
| CDRFR2      | 51596  | NM_001014433 | 10410 | 0.44  | 0.39  | -0.64 | 0.34  | 1.47  | 0.91  | 0.63  | -0.27 | 0.74  | 0.19  | 2.71  | -0.37 |
| PMCH        | 5367   | NM_002674    | 10411 | 0.03  | 0.19  | 0.81  | 1.52  | 0.69  | 0.20  | -0.28 | -0.28 | 0.18  | 1.02  | 2.40  | -0.37 |
| TRIM1       | 8776   | NM_001828    | 10412 | 0.91  | 0.41  | 0.21  | 0.62  | 0.69  | 0.59  | -0.15 | 0.71  | -0.32 | 1.11  | 1.58  | -0.37 |
| TRIP11      | 9321   | NM_004239    | 10413 | -0.13 | -0.29 | 0.55  | 0.37  | -0.27 | 0.60  | -0.37 | 0.10  | -0.10 | 0.11  | 0.69  | -0.37 |
| DKFZP47E052 | 84236  | NM_032276    | 10414 | -0.30 | -0.03 | 0.08  | 0.57  | 0.55  | 0.08  | -0.15 | -0.49 | 0.27  | 0.36  | 1.21  | -0.37 |
| UF1         | 3978   | NM_002309    | 10415 | -0.62 | 0.71  | -0.35 | 0.96  | 0.88  | 1.17  | -0.56 | 0.88  | -0.70 | -0.26 | 3.01  | -0.37 |
| TMIE        | 29263  | NM_147196    | 10416 | 0.43  | 0.35  | -0.21 | 0.24  | -0.07 | 0.09  | 0.42  | -0.09 | 0.44  | 0.43  | 0.89  | -0.37 |
| UT287       | 7364   | NM_001074    | 10417 | -0.27 | 0.06  | -0.70 | -0.77 | -0.70 | -0.50 | -0.02 | 0.01  | -0.36 | -1.02 | -1.98 | -0.37 |
| MIRA        | 23286  | NM_015228    | 10418 | 0.60  | 0.78  | 0.18  | 0.91  | 0.68  | 0.71  | -0.30 | 0.30  | -0.37 | 1.56  | 2.30  | -0.37 |
| NTR1        | 934    | NM_014916    | 10419 | 0.94  | -0.93 | -0.74 | 0.94  | -0.20 | -0.27 | -0.14 | -0.20 | -0.27 | -2.92 | -3.95 | -0.37 |
| LOC40102    | 40102  | NM_001008737 | 10420 | -1.11 | 0.95  | -0.85 | -0.75 | -1.04 | -1.53 | -0.06 | -0.49 | 0.17  | -2.91 | -3.32 | -0.38 |
| ITP         | 3574   | NM_000880    | 10421 | 0.14  | 0.25  | 1.04  | 1.18  | 1.35  | 0.49  | -0.52 | -0.53 | 0.67  | 1.43  | 3.03  | -0.38 |
| RPH1C       | 8450   | NM_0010452   | 10422 | -0.67 | -0.03 | -0.10 | -0.86 | -0.57 | -0.85 | -0.70 | -0.65 | -0.65 | -0.24 | 0.66  | -0.38 |
| TAB3        | 25739  | NM_198312    | 10423 | -0.82 | -0.29 | -0.02 | 0.47  | 0.66  | 1.17  | -0.71 | 0.43  | -0.10 | -0.55 | 2.31  | -0.38 |
| MAPRE1      | 22919  | NM_012325    | 10424 | 1.69  | -0.56 | 0.75  | 0.73  | 0.52  | 0.13  | 0.13  | -0.81 | 0.31  | 1.88  | 1.38  | -0.38 |
| LG6         | 59552  | NM_001017404 | 10425 | -0.48 | -0.16 | 0.04  | -0.43 | 0.04  | 0.32  | -0.21 | -0.25 | -0.33 | 0.35  | 0.07  | -0.38 |
| ZZZ3        | 2602   | NM_015234    | 10426 | 0.19  | 0.19  | 0.34  | 0.37  | 0.34  | 0.37  | 0.34  | 0.37  | 0.34  | 0.37  | 1.59  | -0.38 |
| QARS        | 5869   | NM_005051    | 10427 | -1.01 | -1.09 | -1.38 | -2.08 | -1.51 | -1.83 | 0.24  | -0.01 | -0.61 | -3.48 | -4.42 | -0.38 |
| SAG         | 6295   | NM_000541    | 10428 | -0.48 | -0.07 | -0.38 | 0.29  | 0.41  | 0.35  | 0.19  | 0.16  | -0.73 | 0.09  | 0.23  | -0.38 |
| RN11        | 10326  | NM_002069    | 10429 | 0.29  | 0.02  | -0.03 | 0.02  | 0.02  | 0.02  | 0.02  | 0.02  | 0.02  | 0.02  | 0.29  | -0.38 |
| MKN1        | 3758   | NM_000220    | 10430 | -0.23 | -0.72 | -0.31 | -0.64 | 0.11  | -0.28 | -0.17 | -0.32 | 0.11  | -1.26 | -0.81 | -0.38 |
| FAM64A      | 54478  | NM_019103    | 10431 | 0.71  | -0.16 | -0.56 | 0.37  | 0.60  | 0.00  | 0.49  | -0.58 | -0.29 | -0.02 | 0.98  | -0.38 |
| TFPIK       | 1796   | NM_0020404   | 10432 | 0.04  | 0.39  | 0.07  | 0.04  | 0.00  | 0.14  | -0.02 | 0.00  | 0.14  | 1.40  | 2.06  | -0.38 |
| SLC13A4     | 26266  | NM_012450    | 10433 | 0.93  | 1.75  | 0.64  | 2.45  | 1.59  | 2.28  | -0.09 | 0.40  | -0.70 | 3.12  | 6.32  | -0.38 |
| AURKC       | 6795   | NM_001015879 | 10434 | -0.21 | -0.27 | -0.29 | -0.26 | 0.35  | 0.47  | -0.31 | 0.21  | -0.28 | 0.19  | 1.08  | -0.38 |
| ART5-2      | 51752  | NM_016442    | 10435 | 0.64  | 0.30  | 0.00  | -0.70 | -0.44 | -0.22 | -0.23 | -0.10 | -0.06 | -0.94 | -1.15 | -0.38 |
| BTBR        | 28469  | NM_183022    | 10436 | 0.45  | 0.79  | 0.43  | 0.45  | 0.79  | 0.43  | 0.45  | 0.79  | 0.43  | 0.45  | 0.86  | -0.38 |
| FGF19       | 9965   | NM_005117    | 10437 | 0.75  | -0.49 | -0.57 | -0.35 | 0.23  | -0.15 | 0.18  | -0.50 | -0.07 | -0.30 | -0.28 | -0.38 |
| MGC5712     | 202915 | NM_152889    | 10438 | 0.43  | -0.03 | -0.02 | 0.57  | -0.25 | 0.23  | -0.15 | 0.04  | -0.19 | 0.38  | 0.55  | -0.38 |
| TRIP11      | 10554  | NM_0010462   | 10439 | 0.85  | -1.14 | -1.11 | -1.14 | -1.11 | -1.14 | -1.11 | -1.14 | -1.11 | -2.13 | -2.51 | -0.38 |
| LSM1        | 27257  | NM_014462    | 10440 | -0.41 | 0.47  | -0.10 | 1.18  | 0.68  | 0.44  | -0.33 | 0.08  | -0.14 | -0.04 | 1.3   |       |

|            |        |              |       |       |       |       |       |       |       |       |       |       |       |       |       |
|------------|--------|--------------|-------|-------|-------|-------|-------|-------|-------|-------|-------|-------|-------|-------|-------|
| OPN4       | 94233  | NM_033282    | 10529 | -1.10 | -1.26 | -0.92 | -1.35 | -1.45 | -0.84 | 0.09  | -0.11 | -0.40 | -3.28 | -3.63 | -0.42 |
| 1EON4A73   | 10129  | NM_012037    | 10524 | 0.03  | 0.28  | -0.68 | -0.17 | -0.47 | 0.03  | -0.05 | 0.12  | -0.68 | -0.17 | -0.47 | -0.42 |
| TMEM35     | 59535  | NM_021637    | 10525 | 0.93  | 1.12  | -0.82 | -1.82 | -1.54 | -1.58 | 0.32  | -0.58 | 0.48  | 2.67  | 4.94  | -0.42 |
| FLJ3757    | 28494  | NM_173645    | 10526 | -0.16 | -0.03 | 0.55  | 0.49  | -0.13 | 0.07  | -0.55 | 0.24  | -0.11 | 0.36  | 0.44  | -0.42 |
| FLJ3927    | 97507  | NM_198571    | 10527 | -0.60 | -0.21 | -0.05 | -0.07 | -0.24 | 0.82  | -0.22 | -0.01 | -0.20 | -0.86 | 0.50  | -0.42 |
| TMEM43     | 5515   | NM_021216    | 10528 | 0.41  | 0.24  | -0.45 | 0.44  | -0.24 | -0.44 | -0.58 | 0.22  | -0.04 | 1.10  | 1.30  | -0.42 |
| SLOC0A2    | 6555   | NM_000452    | 10529 | -0.24 | -0.78 | 0.05  | 0.41  | 0.24  | 0.53  | 0.05  | -0.64 | 0.17  | -0.96 | 1.17  | -0.42 |
| ELAV2      | 1993   | NM_000432    | 10530 | 0.40  | -0.03 | 0.42  | 0.00  | 0.89  | 0.32  | -0.20 | -0.22 | 0.00  | 0.44  | 1.20  | -0.42 |
| TSRBL1     | 5588   | NM_010110    | 10531 | 0.12  | 0.33  | 0.61  | 0.13  | 0.05  | 0.14  | 0.13  | 0.05  | 0.16  | 0.16  | 0.82  | -0.42 |
| BAG2       | 9532   | NM_000282    | 10532 | 0.80  | 0.24  | 0.23  | 0.42  | 0.96  | 1.17  | 0.39  | -0.39 | -0.42 | 0.78  | 2.55  | -0.42 |
| FN416      | 3449   | NM_002173    | 10533 | -0.29 | 0.57  | -0.56 | 1.19  | 0.54  | 1.28  | -0.68 | 1.04  | 0.79  | -0.28 | 3.01  | -0.42 |
| LOC34902   | 34060  | NM_010307    | 10534 | -0.40 | 0.83  | 0.60  | -0.18 | -0.70 | -0.88 | -0.42 | -0.18 | -0.20 | 1.35  | 2.72  | -0.42 |
| PCDHAC1    | 56135  | NM_031382    | 10535 | 1.11  | 0.16  | 0.83  | 0.39  | 0.56  | 0.50  | 0.22  | -0.63 | 0.01  | 1.78  | 1.46  | -0.42 |
| CTD5PL     | 10217  | NM_005008    | 10536 | 0.00  | 0.04  | 0.08  | 0.23  | 0.76  | 0.14  | 0.26  | -0.46 | -0.22 | 0.13  | 1.13  | -0.42 |
| APF1       | 174    | NM_001134    | 10537 | 1.10  | 0.76  | 0.36  | 1.60  | 1.34  | 0.45  | 0.09  | -0.28 | -0.23 | 2.23  | 3.39  | -0.42 |
| PKR        | 531    | NM_181871    | 10538 | 0.48  | 0.24  | -0.29 | -0.04 | -0.02 | -0.41 | -0.21 | -0.19 | 0.00  | 1.02  | 0.72  | -0.42 |
| PPP1R1C    | 151242 | NM_087137    | 10539 | -0.35 | -0.30 | -0.22 | -0.43 | 0.02  | -0.02 | -0.17 | -0.08 | -0.17 | -0.87 | -0.43 | -0.42 |
| BTG1       | 694    | NM_001731    | 10540 | 0.09  | 0.07  | 0.25  | -0.11 | 0.87  | 0.04  | -0.14 | -0.47 | 0.19  | 0.41  | 0.72  | -0.42 |
| FLJ2642    | 127692 | NM_152415    | 10541 | -0.06 | -0.21 | 0.00  | -0.06 | -0.09 | 0.35  | -0.06 | -0.06 | -0.30 | -0.18 | 0.21  | -0.42 |
| LOC38983   | 38983  | NM_00103515  | 10542 | 0.60  | 0.20  | -0.62 | 0.14  | 0.93  | 0.35  | 0.13  | -0.22 | -0.33 | -0.23 | 1.41  | -0.42 |
| LOC645037  | 645037 | NM_00109811  | 10543 | -0.10 | -1.00 | -1.03 | -0.90 | -1.02 | -1.19 | 0.83  | -0.83 | -0.42 | -2.13 | -2.12 | -0.42 |
| AP3B       | 138    | NM_000238    | 10544 | -0.73 | -0.89 | -0.68 | -0.98 | -1.16 | -1.15 | -0.34 | -0.13 | 0.06  | -2.30 | -2.29 | -0.42 |
| MGC15429   | 84836  | NM_032750    | 10545 | -0.73 | 0.19  | -0.43 | -0.21 | -0.56 | -0.28 | -0.69 | 0.58  | -0.32 | 1.18  | 1.05  | -0.42 |
| POLR3D     | 661    | NM_001722    | 10546 | -0.33 | 0.19  | -0.62 | 0.00  | -0.08 | -0.49 | 0.00  | -0.05 | -0.38 | -0.77 | -0.57 | -0.42 |
| LOC345557  | 345557 | NM_001005473 | 10547 | -0.49 | 0.28  | -0.31 | -0.31 | -0.14 | -0.57 | -0.27 | -0.02 | -0.11 | -0.51 | -1.02 | -0.42 |
| CCORF195   | 154186 | NM_152554    | 10548 | 0.05  | -0.64 | -0.64 | 1.62  | 0.56  | 2.22  | 0.42  | 0.25  | 0.25  | -1.29 | 4.40  | -0.42 |
| CDH17      | 1015   | NM_000463    | 10549 | -0.52 | -0.55 | -0.55 | -0.33 | -0.41 | -0.09 | 0.25  | -0.30 | -0.37 | -0.58 | -0.17 | -0.42 |
| MAGEA11    | 4110   | NM_005366    | 10550 | -0.17 | -0.39 | -0.60 | -0.25 | -0.25 | -0.39 | 0.01  | -0.16 | -0.28 | -0.82 | -0.88 | -0.42 |
| LOC90580   | 90580  | NM_001358    | 10551 | 1.00  | 1.26  | 1.88  | 0.58  | 0.13  | 0.45  | 0.03  | -0.45 | 2.07  | 1.74  | 0.43  | -0.42 |
| DUSP6      | 1848   | NM_022652    | 10552 | 0.71  | -0.07 | -0.52 | 0.83  | 0.07  | 0.01  | -0.05 | -0.20 | -0.18 | 0.11  | 0.91  | -0.42 |
| UMPS       | 7372   | NM_000373    | 10553 | 0.99  | -0.42 | 0.12  | 0.47  | 0.51  | 1.09  | 0.37  | -0.43 | -0.36 | -0.69 | 2.08  | -0.42 |
| SFR3       | 2349   | NM_001426    | 10554 | -0.59 | -1.15 | -0.55 | -1.19 | -1.05 | -1.10 | -0.10 | -0.10 | -0.10 | -0.66 | -0.65 | -0.42 |
| CC25B      | 994    | NM_212530    | 10555 | -0.49 | -0.21 | -0.85 | -0.72 | -0.31 | 0.20  | 0.26  | -0.10 | -0.59 | -1.55 | -0.83 | -0.42 |
| OR4K5      | 79317  | NM_001005483 | 10556 | -0.07 | -0.28 | -0.45 | -0.66 | -0.64 | 0.86  | 0.18  | 0.00  | -0.61 | -0.66 | -0.44 | -0.42 |
| SBP3       | 23848  | NM_018700    | 10557 | 0.29  | 0.60  | 0.88  | 1.69  | 1.54  | 1.07  | -0.29 | 0.22  | -0.36 | 1.76  | 4.30  | -0.42 |
| FLJ11210   | 79840  | NM_001782    | 10558 | 0.95  | 0.02  | 0.13  | 0.02  | 0.59  | 0.22  | 0.82  | -0.19 | 0.04  | 0.64  | 1.57  | -0.42 |
| ASAM       | 79827  | NM_002476    | 10559 | 0.35  | -0.31 | 0.26  | -0.04 | -0.15 | -0.10 | 0.00  | -0.42 | -0.01 | 0.31  | -0.29 | -0.43 |
| FLM0722    | 285966 | NM_173878    | 10560 | -0.46 | -0.05 | 0.33  | 0.39  | -0.32 | 0.54  | -0.59 | 0.27  | -0.10 | -0.18 | 0.61  | -0.43 |
| MGAT1      | 4248   | NM_000209    | 10561 | 0.66  | 0.65  | 0.57  | 0.68  | 0.83  | 0.67  | -0.52 | 0.63  | -0.17 | 1.72  | 1.25  | -0.43 |
| ZNF530     | 348327 | NM_020880    | 10562 | -0.47 | 0.27  | 0.33  | 0.50  | 0.52  | 0.67  | -0.44 | -0.36 | 0.37  | 0.14  | 1.69  | -0.43 |
| ELZ1       | 50615  | NM_021798    | 10563 | -0.09 | 0.68  | -0.20 | -0.07 | 0.23  | 0.68  | -0.14 | 0.05  | -0.33 | 0.38  | 0.84  | -0.43 |
| CAV3       | 859    | NM_012124    | 10564 | -0.86 | -0.30 | 0.34  | -0.71 | 0.40  | -0.17 | 0.40  | -0.17 | 0.40  | -1.53 | -1.03 | -0.43 |
| WNT9B      | 7484   | NM_003396    | 10565 | 0.52  | 0.96  | -1.16 | -1.16 | -1.28 | -1.07 | 0.04  | 0.00  | 0.46  | 0.39  | 3.51  | -0.43 |
| PRIM1      | 5557   | NM_000946    | 10566 | 0.24  | 0.66  | -0.30 | 0.64  | -0.17 | -0.02 | -0.43 | 0.58  | -0.58 | 0.59  | 0.46  | -0.43 |
| DMN        | 23336  | NM_015286    | 10567 | 1.04  | -0.73 | -0.70 | -0.12 | -0.46 | -0.02 | 1.10  | -0.80 | -0.72 | -0.39 | -0.60 | -0.43 |
| TCTD1      | 23211  | NM_001172    | 10568 | 0.08  | 0.09  | 0.08  | 0.34  | 0.28  | 0.14  | 0.12  | -0.14 | 0.02  | 0.39  | 1.36  | -0.43 |
| TCEA1      | 6917   | NM_201437    | 10569 | 0.28  | -0.17 | 0.25  | 0.89  | 0.47  | -0.20 | -0.08 | -0.45 | 0.10  | 0.36  | 1.16  | -0.43 |
| GMAPPE     | 474344 | NM_001007224 | 10570 | -0.26 | -0.06 | -0.29 | -0.14 | -0.10 | -0.48 | -0.06 | -0.36 | -0.01 | -0.61 | -0.73 | -0.43 |
| WRSP5      | 79375  | NM_030581    | 10571 | 0.46  | 0.07  | 0.29  | 0.46  | 0.07  | 0.29  | 0.46  | 0.07  | 0.29  | 0.63  | 0.28  | -0.43 |
| BHLH83     | 79365  | NM_030762    | 10572 | 0.41  | 0.79  | 0.85  | 0.73  | 0.63  | 1.24  | 0.37  | -0.35 | -0.46 | 2.05  | 2.61  | -0.43 |
| S100A4     | 6275   | NM_019554    | 10573 | -0.80 | -0.36 | -0.40 | -0.51 | -0.46 | -0.38 | -0.43 | -0.07 | 0.06  | -1.55 | -1.33 | -0.43 |
| SNA4       | 6759   | NM_175729    | 10574 | -0.25 | -0.51 | 0.41  | 0.25  | 0.84  | -0.26 | 0.64  | -0.17 | 0.04  | -0.25 | -0.65 | -0.43 |
| RLN1       | 6033   | NM_000511    | 10575 | 0.12  | 0.74  | 0.44  | 0.61  | 0.17  | 0.52  | -0.28 | -0.50 | 0.34  | -1.06 | 1.30  | -0.43 |
| PWP2H      | 5822   | NM_005049    | 10576 | -0.15 | -0.73 | 0.33  | 1.79  | -1.08 | 1.68  | -0.07 | -0.45 | 0.09  | -0.55 | 2.39  | -0.43 |
| LOC29380M1 | 83450  | NM_031294    | 10577 | -0.67 | -0.13 | 0.14  | -0.57 | -0.31 | -0.03 | -0.44 | -0.10 | 0.11  | -0.66 | -0.91 | -0.43 |
| LOC129113  | 124842 | NM_207313    | 10578 | -0.10 | -0.31 | 0.29  | -0.06 | 0.11  | 0.09  | 0.12  | -0.06 | 0.50  | 0.14  | 0.43  | -0.43 |
| TA-NFKB1   | 84807  | NM_139239    | 10579 | -0.39 | -0.47 | -0.42 | -0.98 | -0.76 | -0.59 | 0.04  | -0.62 | 0.15  | -1.28 | -2.34 | -0.43 |
| FLI1       | 9470   | NM_000486    | 10580 | -0.14 | -0.25 | -0.57 | 0.10  | -0.02 | 0.00  | 0.02  | 0.01  | -0.47 | -0.97 | 0.15  | -0.43 |
| FLI2       | 2162   | NM_000129    | 10581 | -0.49 | -0.29 | 0.19  | -1.16 | -1.16 | -1.16 | -0.42 | -0.42 | -0.42 | -1.01 | 1.11  | -0.43 |
| C1ORF374   | 174864 | NM_189995    | 10582 | 0.25  | 0.13  | -0.33 | 0.14  | -0.23 | 0.14  | -0.12 | 0.15  | -0.51 | 0.05  | 0.05  | -0.43 |
| TAG2F50    | 259296 | NM_176890    | 10583 | 0.04  | -0.03 | 0.68  | 1.15  | 1.35  | 1.19  | -0.12 | -0.39 | 0.98  | 0.69  | 2.68  | -0.43 |
| TFPI3      | 84795  | NM_01128855  | 10584 | -0.18 | -0.18 | -0.46 | -0.18 | -0.18 | -0.46 | -0.17 | -0.18 | -0.46 | -0.45 | -0.41 | -0.43 |
| LOC152877  | 152877 | NM_001013822 | 10585 | -0.09 | 0.55  | -0.14 | -0.14 | 0.08  | 0.13  | 0.01  | -0.37 | -0.08 | -0.77 | 0.07  | -0.44 |
| GRP123     | 84435  | NM_032422    | 10586 | -0.90 | -1.11 | -1.36 | -0.09 | -1.39 | -0.68 | 0.26  | -0.02 | -0.68 | -3.37 | -2.16 | -0.44 |
| MSS51      | 84059  | NM_032139    | 10587 | 0.69  | 0.21  | 0.51  | 0.31  | 0.90  | 0.12  | -0.01 | -0.39 | -0.04 | 1.47  | 1.13  | -0.44 |
| RFP2       | 100588 | NM_000798    | 10588 | 0.50  | 1.60  | 1.38  | 0.88  | 1.50  | 0.87  | 0.07  | -0.30 | 0.17  | 17.48 | 23.18 | -0.44 |
| USP8       | 9101   | NM_005154    | 10589 | 0.45  | 0.31  | 0.13  | 0.67  | 0.63  | 0.45  | -0.32 | -0.19 | 0.07  | 0.88  | 1.74  | -0.44 |
| C1ORF12    | 51373  | NM_015932    | 10590 | 0.60  | 0.40  | -0.54 | 0.81  | 1.11  | -0.39 | -0.12 | -0.39 | 0.07  | 0.46  | 1.53  | -0.44 |
| FLJ0847    | 5234   | NM_018242    | 10591 | 0.17  | 0.57  | 0.30  | 0.17  | 0.28  | 0.17  | -0.28 | 0.17  | -0.28 | 0.69  | 0.75  | -0.44 |
| GK         | 2710   | NM_000167    | 10592 | 0.10  | 0.24  | 0.01  | 0.54  | -0.37 | 0.03  | -0.48 | 0.21  | -0.17 | 0.35  | 0.20  | -0.44 |
| UTP14A     | 10813  | NM_000649    | 10593 | -0.77 | -0.51 | -0.72 | -0.83 | -1.28 | 0.50  | -0.41 | 0.65  | -0.68 | -2.00 | -1.60 | -0.44 |
| FLJ4993    | 401258 | NM_001722668 | 10594 | -0.47 | -0.19 | 0.50  | -0.19 | -0.17 | 0.12  | -0.17 | 0.12  | -0.17 | -0.53 | -1.01 | -0.44 |
| ADCY3      | 1099   | NM_000036    | 10595 | 0.02  | 0.18  | -0.48 | 0.00  | -0.34 | 0.59  | 0.39  | -0.19 | 0.63  | 0.64  | 2.04  | -0.44 |
| MGC13926   | 130733 | NM_152390    | 10596 | 0.55  | -0.41 | -0.12 | 0.07  | -0.57 | 0.00  | 0.00  | -0.03 | -0.41 | 0.02  | -0.57 | -0.44 |
| KP3F       | 83888  | NM_019150    | 10597 | 2.08  | 2.79  | 1.57  | 2.41  | 1.56  | 1.99  | -0.13 | -0.08 | -0.24 | 6.44  | 5.56  | -0.44 |
| FLJ13817   | 124997 | NM_152448    | 10598 | 0.08  | 0.07  | -0.20 | 0.13  | 0.34  | 0.07  | -0.13 | 0.34  | 0.07  | 0.23  | 0.39  | -0.44 |
| LYL2       | 119180 | NM_183058    | 10599 | 0.54  | -0.24 | -0.50 | -0.34 | -0.43 | -0.48 | 0.14  | -0.16 | -0.42 | -0.20 | -1.26 | -0.44 |
| NM224      | 7767   | NM_013398    | 10600 | 1.44  | 0.18  | 0.99  | 1.36  | 1.55  | 0.52  | -0.11 | -0.44 | 0.10  | 2.61  | 3.43  | -0.44 |
| LEMD1      | 9247   | NM_001015152 | 10601 | 0.69  | 0.43  | 0.43  | 0.82  | 0.82  | 0.82  | 0.12  | -0.42 | -0.42 | -1.42 | 1.51  | -0.44 |
| TSR8       | 7253   | NM_001018036 | 10602 | -0.15 | 0.44  | -0.55 | 1.27  | 0.43  |       |       |       |       |       |       |       |

|            |        |              |       |       |       |       |       |       |       |       |       |       |       |       |       |       |
|------------|--------|--------------|-------|-------|-------|-------|-------|-------|-------|-------|-------|-------|-------|-------|-------|-------|
| OSTM1      | 2862   | NM_014028    | 10685 | -0.78 | -0.90 | -0.82 | -0.84 | -0.22 | -0.89 | 0.56  | -0.81 | 0.24  | -2.50 | -1.95 | -0.48 |       |
| EH3A3      | 2892   | NM_014084    | 10686 | 0.26  | 0.37  | 0.37  | 0.37  | 0.31  | 0.27  | 0.32  | -0.34 | 0.88  | 0.70  | 0.68  | -0.48 |       |
| ACOT1      | 641371 | NM_00103761  | 10687 | 0.52  | 0.95  | 0.49  | -0.96 | -0.73 | 0.06  | 0.04  | -0.38 | -0.15 | 1.96  | -1.63 | -0.48 |       |
| SUTR3      | 22865  | NM_014926    | 10688 | 1.28  | 0.18  | -0.23 | 0.17  | -0.33 | -0.16 | 0.47  | -0.52 | -0.44 | 1.33  | -0.32 | -0.48 |       |
| PHFD1      | 254295 | NM_174953    | 10689 | -0.03 | 0.31  | -0.32 | -0.37 | -0.08 | -0.27 | -0.33 | 0.07  | -0.23 | -0.04 | -0.72 | -0.48 |       |
| PHAF9P3    | 119584 | NM_009690    | 10690 | 0.51  | 0.13  | 0.89  | 0.81  | 1.01  | 0.81  | 0.84  | 0.33  | 0.66  | 0.25  | 2.36  | -0.48 |       |
| CTCLF      | 140690 | NM_080618    | 10691 | -0.39 | -0.79 | 0.06  | -0.20 | -0.13 | -0.83 | -0.49 | 0.77  | 0.78  | -1.12 | -1.16 | -0.48 |       |
| CRBBP      | 1387   | NM_004380    | 10692 | -0.47 | -0.95 | -0.85 | -0.95 | -0.43 | -0.96 | 0.16  | -0.64 | 0.00  | -2.27 | -2.35 | -0.48 |       |
| DCR3B16    | 6489   | NM_002836    | 10693 | 0.30  | 0.46  | 0.30  | 0.30  | 0.40  | 0.17  | 0.18  | -0.40 | 0.17  | 0.20  | 0.25  | 0.03  |       |
| CASC1      | 55259  | NM_018272    | 10694 | -0.49 | 0.18  | 0.80  | -0.41 | 0.96  | 1.32  | -0.42 | 0.22  | -0.29 | 0.48  | 1.87  | -0.48 |       |
| LOC9380    | 93380  | NM_173470    | 10695 | 0.09  | 0.77  | 1.13  | 1.05  | 0.21  | 0.41  | -0.71 | 0.24  | -0.02 | 1.99  | 1.67  | -0.48 |       |
| SNRPB      | 669    | NM_002216    | 10696 | -1.49 | -0.60 | -0.71 | -0.62 | -2.57 | -2.07 | -0.47 | -0.17 | -0.27 | -4.86 | -3.64 | -0.48 |       |
| RFY1       | 5988   | NM_002918    | 10697 | 0.51  | 0.69  | 0.55  | 0.09  | 0.47  | -0.39 | 0.13  | -0.95 | 0.33  | 0.37  | 0.17  | -0.48 |       |
| PPF3C      | 5536   | NM_006247    | 10698 | 0.29  | 0.27  | -0.21 | -0.15 | -0.19 | 0.49  | 0.10  | -0.02 | -0.57 | 0.36  | 0.15  | -0.48 |       |
| FKBP31     | 79791  | NM_024735    | 10699 | 0.13  | -0.48 | 0.08  | 0.55  | 1.49  | 0.31  | 0.49  | -0.95 | -0.03 | -0.27 | 2.85  | -0.48 |       |
| ANKRD26    | 22852  | NM_014915    | 10700 | -0.03 | 0.53  | 1.06  | 1.10  | 1.52  | 1.10  | 0.56  | 0.09  | 0.00  | 1.56  | 3.81  | -0.48 |       |
| SMOCC1     | 64093  | NM_022137    | 10701 | -0.80 | -0.86 | -0.63 | -0.57 | -0.51 | -0.93 | -0.31 | -0.39 | 0.22  | -2.29 | -2.01 | -0.49 |       |
| LOC554251  | 554251 | NM_00102680  | 10702 | 0.07  | 0.56  | -0.38 | 0.54  | 0.00  | 0.51  | -0.42 | 0.08  | -0.15 | 0.25  | 1.05  | -0.49 |       |
| SPIN2      | 474342 | NM_001006683 | 10703 | -0.23 | 0.37  | -0.18 | -0.10 | 0.53  | -0.10 | -0.21 | -0.05 | -0.23 | -0.14 | 0.33  | -0.49 |       |
| DBR1       | 51163  | NM_016216    | 10704 | -1.24 | -1.23 | -1.24 | -1.84 | -1.89 | -1.84 | -0.13 | -0.47 | 0.11  | -3.71 | -5.58 | -0.49 |       |
| MM7B       | 57644  | NM_020884    | 10705 | -0.95 | -1.00 | -0.08 | 0.15  | 0.26  | -1.04 | -0.81 | -1.01 | 1.32  | -2.03 | -0.62 | -0.49 |       |
| HRC5       | 51151  | NM_016233    | 10706 | -0.30 | -0.42 | -0.18 | -0.06 | 0.06  | 0.23  | 0.04  | -0.33 | -0.20 | -0.98 | 0.22  | -0.49 |       |
| LOC132430  | 132430 | NM_00114734  | 10707 | 0.86  | 0.78  | -0.43 | 2.07  | 2.07  | 1.88  | 0.83  | -0.71 | -0.61 | 0.34  | 6.01  | -0.49 |       |
| PRCP       | 5547   | NM_005040    | 10708 | 0.25  | 0.29  | -0.09 | 1.16  | 0.54  | -0.44 | -0.36 | -0.34 | 0.21  | 0.44  | 0.27  | -0.49 |       |
| PTCH3      | 174308 | NM_00103842  | 10709 | 1.11  | -0.45 | -0.57 | -0.45 | -0.61 | -0.29 | 0.18  | -0.43 | -0.24 | 0.09  | -1.31 | -0.49 |       |
| THO2       | 30846  | NM_014901    | 10710 | 0.39  | 0.33  | 0.34  | 0.15  | -0.40 | -0.17 | 0.27  | -0.33 | 0.11  | 0.08  | -0.42 | -0.49 |       |
| PPP3R1     | 5534   | NM_000945    | 10711 | -0.63 | 0.18  | -0.25 | 1.05  | 0.21  | -0.68 | -0.85 | 0.11  | 0.25  | -0.68 | 0.58  | -0.49 |       |
| NEUROD2    | 4761   | NM_006160    | 10712 | 0.36  | 0.40  | -0.10 | 0.40  | -0.09 | -0.13 | -0.42 | 0.30  | -0.37 | 0.66  | -0.18 | -0.49 |       |
| CTSL1      | 54546  | NM_017147    | 10713 | 0.00  | -0.15 | -0.17 | -0.15 | -0.17 | -0.11 | -0.11 | -0.11 | -0.11 | 0.23  | 0.39  | -0.49 |       |
| NFY1       | 4771   | NM_181831    | 10714 | 0.59  | -1.14 | -0.82 | -1.08 | -0.81 | -0.46 | 0.50  | -0.63 | -0.37 | -2.55 | -2.34 | -0.49 |       |
| PDR2Z      | 5436   | NM_002696    | 10715 | -0.86 | -0.85 | -0.91 | -0.31 | -0.10 | -1.14 | -0.53 | -0.06 | 0.10  | -2.61 | -0.93 | -0.49 |       |
| NSIC       | 9347   | NM_002908    | 10716 | -0.55 | -0.38 | -0.16 | -0.76 | -0.55 | -0.28 | -0.16 | -0.28 | -0.16 | -1.04 | -0.84 | -0.49 |       |
| ZNF322     | 7775   | NM_014519    | 10717 | 1.28  | 0.01  | 0.75  | 0.26  | 0.47  | 0.36  | 0.36  | -0.57 | -0.29 | 2.01  | 1.10  | -0.49 |       |
| ADH6       | 130    | NM_000672    | 10718 | 0.24  | 0.45  | 0.53  | 0.42  | 0.73  | 0.11  | -0.22 | -0.23 | -0.05 | 1.22  | 1.26  | -0.49 |       |
| FXD1       | 5348   | NM_005051    | 10719 | 0.20  | -0.71 | -0.87 | -1.60 | -0.82 | -1.29 | -0.58 | -0.65 | -0.42 | -1.77 | -3.70 | -0.49 |       |
| DHFR1L1    | 20089  | NM_176815    | 10720 | 0.16  | 0.11  | 0.63  | 0.10  | -0.63 | 0.43  | 0.08  | 0.57  | 0.04  | 0.95  | 1.38  | -0.49 |       |
| BGN        | 633    | NM_001711    | 10721 | 0.43  | 0.06  | 1.35  | 1.17  | 1.40  | 1.59  | -0.21 | -0.27 | -0.01 | 1.84  | 4.16  | -0.49 |       |
| TAS2B4     | 29592  | NM_176887    | 10722 | 0.32  | 1.09  | -1.12 | 0.83  | 1.30  | 2.08  | -0.10 | -0.08 | -0.31 | 1.29  | 2.41  | -0.49 |       |
| ZNF29      | 8147   | NM_00109283  | 10723 | 0.55  | 0.25  | 0.07  | 0.07  | 0.07  | 0.07  | 0.07  | 0.07  | 0.07  | 0.38  | 1.04  | -0.49 |       |
| ARL6P4     | 51329  | NM_016638    | 10724 | -0.59 | -0.31 | 0.23  | 0.00  | -0.66 | 0.03  | -0.14 | -0.10 | -0.25 | -0.67 | -0.63 | -0.49 |       |
| MCC1197    | 51319  | NM_016625    | 10725 | 0.08  | 0.28  | 1.11  | 0.40  | 0.13  | 0.85  | -0.33 | 0.03  | -0.20 | 1.47  | 1.38  | -0.49 |       |
| ROSL1      | 8038   | NM_025128    | 10726 | 0.79  | 0.03  | 1.32  | 0.79  | 0.03  | 1.12  | -0.13 | -0.59 | 0.13  | 2.14  | 6.73  | -0.49 |       |
| ORMDL3     | 9410   | NM_130280    | 10727 | 1.00  | 0.07  | 1.77  | 0.37  | 1.46  | 1.65  | 0.45  | -0.52 | 0.48  | 0.70  | 1.47  | -0.50 |       |
| LRV7C      | 55327  | NM_018362    | 10728 | 0.75  | 0.76  | 0.03  | 0.91  | 0.80  | 0.41  | -0.24 | -0.01 | -0.24 | 1.54  | 2.12  | -0.50 |       |
| CK4L1      | 21970  | NM_153388    | 10729 | -0.08 | -1.08 | -0.30 | -0.94 | -0.91 | -0.37 | 0.05  | -0.66 | 0.12  | -1.45 | -2.23 | -0.50 |       |
| LEP4       | 842    | NM_005773    | 10730 | 0.08  | 0.23  | 0.16  | 0.06  | 0.32  | 0.06  | -0.32 | 0.06  | -0.32 | 0.47  | 0.26  | -0.50 |       |
| EB3        | 10148  | NM_005755    | 10731 | 0.75  | 0.45  | 1.56  | 0.57  | 1.08  | 1.16  | -0.32 | -0.33 | 0.16  | 2.76  | 2.81  | -0.50 |       |
| PPB        | 5479   | NM_000942    | 10732 | -0.36 | 0.06  | 0.40  | -0.55 | -0.17 | 0.67  | -0.06 | -0.10 | -0.34 | 0.09  | -0.05 | -0.50 |       |
| AP2T1      | 27513  | NM_198998    | 10733 | 0.51  | 0.63  | 0.27  | 0.49  | 0.29  | 0.49  | 0.29  | 0.49  | 0.29  | 0.49  | 0.44  | 1.51  | -0.50 |
| CI4ORF155  | 84075  | NM_023135    | 10734 | 0.35  | 0.95  | -0.48 | 1.44  | 0.87  | 0.81  | -0.06 | -0.04 | -0.40 | 0.82  | 3.11  | -0.50 |       |
| MMR14      | 64828  | NM_023111    | 10735 | -0.12 | -0.85 | -0.84 | 0.11  | -0.31 | -0.13 | 0.29  | -0.23 | -0.56 | -1.57 | -0.33 | -0.50 |       |
| SOX11      | 656    | NM_001808    | 10736 | 0.61  | -0.85 | -0.81 | -0.61 | -0.24 | 0.36  | -0.61 | -0.24 | 0.36  | -0.51 | -0.49 | -0.50 |       |
| ANKRD29    | 147463 | NM_173505    | 10737 | 0.77  | 0.24  | 0.98  | 0.38  | 0.00  | 0.89  | -0.82 | -0.30 | 0.62  | 0.03  | 0.29  | -0.50 |       |
| LYPL1      | 10434  | NM_006330    | 10738 | -0.15 | -0.02 | -0.12 | -0.28 | -0.12 | 0.00  | -0.32 | 0.17  | 0.35  | -0.29 | 0.15  | -0.50 |       |
| LIF34      | 55713  | NM_018102    | 10739 | -0.03 | -0.54 | 0.56  | -0.36 | -0.76 | -0.09 | -0.60 | -0.20 | 0.29  | -0.02 | -1.17 | -0.50 |       |
| 10ADK1     | 1042   | NM_016172    | 10740 | 0.28  | -0.49 | 0.64  | 0.40  | 0.36  | 0.24  | -0.04 | 0.36  | 0.24  | 1.42  | 0.67  | -0.50 |       |
| IFT5       | 24138  | NM_012420    | 10741 | 0.77  | -0.18 | -0.23 | 0.07  | 0.30  | 0.82  | 0.29  | -0.21 | -0.59 | 0.36  | 1.19  | -0.50 |       |
| PAK2       | 5076   | NM_003989    | 10742 | 0.31  | 2.25  | 0.27  | 1.53  | 2.29  | 0.41  | -0.41 | 1.08  | -1.17 | 2.83  | 7.83  | -0.50 |       |
| 118A       | 13743  | NM_002960    | 10743 | 0.98  | -1.00 | -0.82 | -1.18 | -1.07 | 0.00  | -1.18 | -1.07 | 0.00  | -3.18 | -4.20 | -0.50 |       |
| GRK5       | 2869   | NM_005308    | 10744 | -0.39 | -0.60 | -0.38 | -0.32 | -1.13 | -0.56 | -0.38 | 0.20  | -0.32 | -1.37 | -2.01 | -0.50 |       |
| HVAL2      | 8692   | NM_003773    | 10745 | 1.14  | 0.08  | 0.11  | 0.85  | 2.75  | 1.20  | 0.38  | -0.40 | -0.48 | 1.32  | 4.80  | -0.50 |       |
| 118B       | 11836  | NM_002897    | 10746 | -0.46 | -0.46 | -0.74 | -0.62 | -0.40 | -0.36 | -0.46 | -0.36 | -0.46 | -0.62 | -0.62 | -0.50 |       |
| KCNJ9      | 3765   | NM_004983    | 10747 | 0.25  | 0.51  | -0.18 | -0.11 | -0.34 | -0.49 | -0.33 | -0.26 | 0.09  | 0.95  | 0.94  | -0.50 |       |
| C5MD2      | 114784 | NM_052896    | 10748 | -0.32 | -1.12 | -0.06 | 0.11  | 0.02  | -0.35 | -0.39 | -0.87 | 0.76  | -1.50 | -0.21 | -0.50 |       |
| CACNA1D    | 776    | NM_000720    | 10749 | -0.20 | 0.48  | -0.44 | 0.33  | 0.20  | -0.22 | -0.31 | 0.26  | -0.45 | -0.16 | 0.32  | -0.50 |       |
| CEP350     | 44500  | NM_020463    | 10750 | 0.14  | 0.49  | 0.17  | 0.17  | 0.17  | 0.17  | 0.17  | 0.17  | 0.17  | 0.17  | 0.17  | -0.50 |       |
| RRM12      | 10137  | NM_152838    | 10751 | -0.37 | -1.08 | -0.15 | -0.96 | -0.67 | -0.80 | -0.05 | -0.72 | 0.27  | -1.60 | -2.43 | -0.50 |       |
| PCNK       | 22890  | NM_014982    | 10752 | -0.19 | 0.21  | 0.12  | 0.01  | -0.40 | -0.32 | -0.43 | -0.05 | -0.03 | 0.15  | -0.51 | -0.50 |       |
| RRN1P1     | 5687   | NM_130395    | 10753 | 0.70  | 0.23  | 0.61  | 0.20  | 0.69  | 0.20  | 0.69  | 0.20  | 0.69  | 0.72  | 2.56  | -0.50 |       |
| DICER1     | 23405  | NM_030621    | 10754 | 0.46  | -0.53 | 0.62  | -0.23 | -0.33 | 0.35  | -0.08 | -0.47 | 0.05  | 0.55  | -0.22 | -0.51 |       |
| 11F10      | 84639  | NM_173161    | 10755 | -0.31 | -0.35 | 0.26  | 0.33  | 0.71  | 0.41  | 0.00  | -0.30 | -0.26 | 0.40  | 1.45  | -0.51 |       |
| DNAH34B101 | 8338   | NM_021421    | 10756 | -0.25 | -0.44 | 0.66  | 0.11  | 0.66  | 0.69  | 0.45  | 0.69  | 0.45  | 0.12  | 0.54  | -0.51 |       |
| CLCF3      | 10143  | NM_005752    | 10757 | 0.44  | 0.76  | 0.76  | -0.57 | -0.42 | -0.09 | 0.40  | -0.29 | -0.62 | -1.08 | -1.01 | -0.51 |       |
| KRTH6      | 8689   | NM_003771    | 10758 | 0.34  | -0.40 | -0.60 | -0.61 | -0.57 | 0.03  | 0.43  | -0.35 | -0.59 | -0.67 | -1.15 | -0.51 |       |
| LAPTM2A    | 9741   | NM_014713    | 10759 | 0.29  | -0.52 | 0.33  | 1.12  | 1.79  | 0.89  | 0.19  | -0.92 | 0.22  | 1.10  | 3.26  | -0.51 |       |
| 10GALNA2   | 10010  | NM_006466    | 10760 | 0.85  | 0.17  | 0.41  | 0.41  | 0.37  | 0.30  | -0.43 | 0.37  | 0.30  | 1.43  | 1.12  | -0.51 |       |
| SLC17A2    | 10246  | NM_005835    | 10761 | 0.24  | 0.49  | -0.94 | 0.33  | 0.27  | -0.52 | -0.25 | 0.07  | -0.32 | -0.69 | 0.08  | -0.51 |       |
| IFNG       | 3458   | NM_000619    | 10762 | -0.58 | 0.30  | 0.90  | 0.00  | 0.64  | 0.88  | 0.00  | -0.28 | -0.23 | 1.77  | 1.52  | -0.51 |       |
| IFIT5      | 405    | NM_002349    | 10763 | 0.58  | 0.94  | 0.59  | 0.58  | 0.94  | 0.59  | 1.17  | 0.52  | 0.17  | 2.12  | 2.38  | -0.51 |       |
| DAOA       | 26702  | NM_172370    | 10764 | 0.16  | 0.70  | -0.48 | 0.20  | 0.68  | 0.74  | -0.03 | 0.09  | -0.57 | 0.38  | 1.6   |       |       |

|           |        |              |       |       |       |       |       |       |       |       |       |       |       |       |       |
|-----------|--------|--------------|-------|-------|-------|-------|-------|-------|-------|-------|-------|-------|-------|-------|-------|
| MGP       | 4256   | NM_000900    | 10847 | 1.27  | 1.06  | 0.58  | 0.75  | 1.25  | 0.44  | 0.14  | -0.39 | -0.29 | 2.91  | 2.44  | -0.54 |
| FL38680   | 25746  | NM_001420    | 10848 | 0.30  | 0.20  | 0.60  | 0.40  | 1.30  | 0.61  | -0.21 | -0.29 | -0.21 | 1.01  | 1.65  | -0.60 |
| LOC388389 | 388389 | NM_213607    | 10849 | 0.31  | 0.10  | 0.81  | 0.74  | 0.88  | 0.27  | -0.44 | -0.15 | 0.04  | 1.22  | 1.71  | -0.49 |
| NFKB2     | 4791   | NM_002502    | 10850 | 0.29  | 0.34  | 0.50  | 1.57  | 0.65  | 1.89  | -0.20 | 0.35  | -0.69 | 1.12  | 4.12  | -0.54 |
| CLDN      | 1047   | NM_004362    | 10851 | 0.27  | 0.08  | 0.18  | 1.17  | 0.68  | 0.94  | -0.30 | 0.00  | -0.24 | 0.53  | 2.79  | -0.54 |
| SPOC2     | 6716   | NM_002348    | 10852 | 0.28  | 0.10  | 0.85  | 0.93  | 0.67  | 0.45  | -0.60 | 0.45  | 0.75  | 0.94  | 2.64  | -0.54 |
| TBC1D14   | 57533  | NM_020773    | 10853 | -0.38 | 0.65  | 0.14  | -0.24 | 0.35  | -0.24 | -0.54 | -0.23 | 0.23  | 0.41  | -0.13 | -0.54 |
| PCDCL162  | 80380  | NM_025239    | 10854 | -0.34 | -0.34 | -0.11 | 0.97  | 0.11  | -0.22 | -0.30 | -0.50 | 0.26  | -0.79 | 0.86  | -0.55 |
| ZNF560    | 14774  | NM_025476    | 10855 | 0.10  | 0.49  | 0.49  | 0.10  | 0.12  | 0.19  | 0.49  | 0.49  | 0.19  | 0.42  | 0.58  | -0.55 |
| LOC285148 | 285148 | NM_00109613  | 10856 | -0.76 | 0.24  | -0.25 | -0.02 | -0.06 | 0.60  | -0.42 | 0.06  | -0.19 | -0.77 | 0.52  | -0.55 |
| MCOLN3    | 55283  | NM_018298    | 10857 | 0.71  | 0.62  | 0.02  | 0.56  | 0.21  | 0.09  | -0.27 | 0.07  | -0.35 | 1.36  | 0.86  | -0.55 |
| MNAS      | 135    | NM_003843    | 10858 | -0.13 | -0.68 | -0.43 | -0.12 | -0.49 | -0.72 | 0.13  | -0.43 | -0.33 | -1.63 | 0.85  | -0.55 |
| MYBBP1A   | 10514  | NM_014520    | 10859 | 0.32  | 0.31  | 0.16  | -0.32 | 0.42  | 0.00  | -0.12 | -0.29 | 0.14  | 0.79  | 0.10  | -0.55 |
| TNFRSF10C | 8794   | NM_003841    | 10860 | -0.10 | 0.58  | 0.09  | 0.49  | 0.96  | 0.01  | -0.52 | -0.17 | 0.14  | 0.57  | 1.46  | -0.55 |
| FAS       | 855    | NM_132876    | 10861 | -0.79 | -0.76 | 0.13  | -0.58 | -0.20 | 0.90  | -0.40 | -0.49 | 0.34  | -1.41 | 0.12  | -0.55 |
| ATF3      | 114783 | NM_055866    | 10862 | 0.11  | -0.11 | 0.36  | -0.05 | 0.74  | 0.01  | 0.10  | -0.36 | -0.25 | 0.35  | 0.75  | -0.55 |
| ZNF606    | 80095  | NM_025027    | 10863 | 0.66  | -0.09 | 1.66  | 1.97  | 2.87  | 1.30  | -0.13 | -0.89 | 0.47  | 2.23  | 5.94  | -0.55 |
| UBE2J1    | 51465  | NM_016021    | 10864 | -0.96 | -0.01 | -1.01 | -0.55 | -0.50 | -1.88 | -0.31 | 0.20  | -0.45 | -1.98 | -1.94 | -0.55 |
| DH01      | 27294  | NM_014475    | 10865 | -0.20 | 0.08  | -0.62 | -0.44 | -0.25 | -0.19 | -0.40 | 0.19  | -0.44 | -0.84 | 0.88  | -0.55 |
| HABP2     | 3026   | NM_004132    | 10866 | 0.51  | -0.41 | 0.11  | -0.24 | 0.30  | 0.48  | 0.34  | -0.39 | -0.49 | 0.21  | 0.55  | -0.55 |
| KMA041    | 9812   | NM_014773    | 10867 | -0.31 | 0.69  | 0.22  | 0.41  | 0.52  | 0.98  | -0.31 | 0.03  | -0.27 | 0.61  | 1.91  | -0.55 |
| BT2A2     | 11116  | NM_007047    | 10868 | -0.53 | -0.65 | -0.61 | -0.74 | -0.47 | -0.82 | -0.12 | -0.30 | -0.13 | -1.79 | -2.04 | -0.55 |
| VCY1B     | 35353  | NM_181880    | 10869 | 0.57  | 0.95  | -0.94 | -0.38 | -0.34 | -1.38 | 0.30  | -0.84 | 0.93  | 2.36  | 2.10  | -0.55 |
| HYDIN     | 54768  | NM_017558    | 10870 | -0.01 | 0.31  | -0.29 | -0.03 | -0.18 | 0.79  | -0.18 | 0.00  | -0.37 | 0.01  | 0.58  | -0.55 |
| CDM2      | 83605  | NM_011443    | 10871 | 0.93  | -0.27 | -0.05 | -0.47 | 0.26  | 0.29  | 0.55  | -0.68 | -0.42 | 0.62  | 0.08  | -0.55 |
| CCL1      | 1195   | NM_00126446  | 10872 | -0.45 | 0.21  | -0.22 | 0.89  | 0.92  | 0.84  | 0.73  | -0.15 | 0.33  | -0.46 | 0.97  | -0.55 |
| LOC389421 | 389421 | NM_001004317 | 10873 | -0.74 | -1.23 | -0.72 | -1.32 | 0.20  | -0.77 | 0.74  | -0.93 | -0.36 | -2.69 | -1.89 | -0.55 |
| KMA1127   | 56243  | NM_019390    | 10874 | 0.22  | -0.35 | -0.82 | 0.70  | -0.77 | -0.92 | 0.18  | -0.27 | -0.46 | -0.95 | -2.40 | -0.55 |
| RFBP9     | 154675 | NM_032290    | 10875 | 0.81  | 0.83  | 0.29  | 0.81  | -0.17 | -0.63 | -0.28 | 0.13  | -0.23 | 0.23  | 1.08  | -0.55 |
| HP3       | 84343  | NM_032383    | 10876 | 0.81  | 0.55  | 0.12  | 1.03  | 1.23  | 1.20  | 0.00  | -0.34 | -0.21 | 1.48  | 3.46  | -0.55 |
| ASXL2     | 55252  | NM_018263    | 10877 | -0.07 | -0.22 | 0.32  | -0.63 | 0.02  | 0.00  | -0.17 | 0.09  | -0.47 | 0.03  | -0.61 | -0.55 |
| TNFRSF5   | 869    | NM_003074    | 10878 | 0.15  | 0.52  | 0.14  | 0.26  | 0.64  | -0.17 | -0.16 | 0.24  | -0.16 | 0.23  | 2.26  | -0.55 |
| CACNG2    | 59294  | NM_031896    | 10879 | 0.20  | -0.40 | -0.38 | -0.38 | -0.21 | 0.78  | -0.58 | -0.03 | 0.05  | -0.80 | 1.38  | -0.55 |
| LUC7L2    | 51631  | NM_016019    | 10880 | 0.03  | 0.14  | 0.42  | -0.03 | 0.75  | 1.12  | 0.24  | -0.44 | -0.35 | 0.59  | 1.84  | -0.55 |
| SLC3A19   | 940024 | NM_001030841 | 10881 | -0.64 | -0.21 | -0.15 | -0.31 | -0.55 | -0.49 | -0.65 | 0.14  | -0.05 | -1.10 | -1.85 | -0.55 |
| LOC103704 | 5702   | NM_018074    | 10882 | 0.60  | 0.52  | 0.19  | 0.62  | -0.08 | -0.46 | -0.24 | -0.46 | -0.24 | 0.71  | 0.02  | -0.55 |
| LOC41956  | 441956 | NM_001013729 | 10883 | -0.44 | -0.12 | -0.01 | -0.73 | -0.17 | -0.12 | -0.10 | -0.34 | -0.11 | -0.57 | -1.02 | -0.56 |
| ZNF515    | 169792 | NM_152629    | 10884 | -0.32 | -0.24 | 0.68  | 0.13  | 0.16  | 0.67  | -0.23 | -0.40 | 0.07  | 0.12  | 0.97  | -0.56 |
| MCC120221 | 943    | NM_032221    | 10885 | -0.17 | -0.22 | -0.76 | 0.17  | 0.22  | 0.16  | 0.12  | -0.76 | 0.10  | -0.70 | 1.23  | -0.56 |
| CRIP2     | 1397   | NM_001312    | 10886 | 1.07  | 0.47  | 1.12  | 2.43  | 0.71  | 2.02  | -0.17 | -0.17 | -0.22 | 2.65  | 5.16  | -0.56 |
| LOC643905 | 643905 | NM_00108035  | 10887 | -0.79 | -1.15 | -1.03 | -1.01 | -1.23 | -1.03 | 0.00  | -0.40 | -0.15 | -2.98 | -3.26 | -0.56 |
| GLI1      | 947    | NM_001410    | 10888 | 0.09  | 1.14  | 1.03  | 1.17  | 0.26  | 1.17  | 0.26  | 0.26  | 0.26  | 2.25  | 2.17  | -0.56 |
| SRP19     | 6728   | NM_003135    | 10889 | 0.83  | 0.72  | 1.24  | 1.58  | 1.60  | 0.73  | -0.53 | -0.46 | 0.44  | 2.79  | 3.91  | -0.56 |
| SNN       | 8303   | NM_003498    | 10890 | -0.66 | 0.50  | 0.38  | 2.09  | 2.50  | 1.85  | -0.70 | -0.46 | 0.60  | 0.21  | 6.44  | -0.56 |
| KMA1173   | 57467  | NM_020707    | 10891 | -0.35 | -0.56 | -0.03 | 0.00  | -0.21 | 0.60  | -0.03 | -0.09 | -0.44 | -0.94 | 0.38  | -0.56 |
| DMS5      | 5061   | NM_00100897  | 10892 | 0.29  | 0.07  | 0.34  | 0.14  | 0.17  | 0.74  | 0.34  | 0.17  | 0.34  | 0.34  | 2.16  | -0.56 |
| PCDHGA10  | 56106  | NM_032090    | 10893 | 1.38  | -0.45 | -1.02 | 0.82  | 1.15  | 0.84  | 1.22  | -0.81 | -0.97 | -0.09 | 2.81  | -0.56 |
| OR6B16    | 114880 | NM_145739    | 10894 | -0.55 | -0.80 | -0.88 | -1.12 | -0.99 | -1.23 | -0.15 | -0.34 | -0.06 | -2.22 | -3.34 | -0.56 |
| IL12I183  | 6447   | NM_032043    | 10895 | 0.17  | 0.20  | 0.47  | 0.25  | 0.18  | 0.47  | 0.25  | 0.18  | 0.47  | 0.25  | 1.94  | -0.56 |
| LLIF5     | 26525  | NM_173170    | 10896 | 0.31  | 0.18  | 0.05  | -0.87 | 0.38  | 0.03  | -0.41 | -0.13 | -0.03 | 1.28  | 0.56  | -0.56 |
| DAZ2      | 57995  | NM_00105786  | 10897 | 0.80  | 1.03  | 0.33  | 1.14  | 2.08  | 1.23  | -0.05 | -0.05 | -0.51 | 2.15  | 4.46  | -0.56 |
| LOC20014  | 54795  | NM_020622    | 10898 | -1.06 | -1.21 | -0.13 | -1.02 | -0.45 | -0.62 | -0.42 | -0.42 | -0.42 | -2.40 | -2.48 | -0.56 |
| LOC36601  | 284646 | NM_173695    | 10899 | -0.28 | 0.48  | -0.52 | -0.28 | 0.46  | 0.20  | 0.31  | -0.53 | -0.33 | 1.28  | 0.38  | -0.56 |
| ITGB1BP1  | 9270   | NM_022334    | 10900 | -0.23 | -0.17 | -0.42 | -0.43 | -0.49 | -0.20 | -0.14 | -0.06 | -0.36 | -0.82 | -1.13 | -0.56 |
| SUZ12     | 155346 | NM_207420    | 10901 | 0.15  | -0.05 | -0.16 | -0.02 | -0.98 | -0.13 | -0.19 | 0.01  | -0.38 | 0.06  | -1.13 | -0.56 |
| OR6B13    | 2603   | NM_145322    | 10902 | 0.49  | 0.34  | 0.94  | 0.41  | -0.37 | -0.36 | -0.37 | -0.36 | -0.36 | 0.80  | 0.78  | -0.56 |
| P5D       | 5662   | NM_002779    | 10903 | 0.13  | -0.37 | -0.84 | 0.29  | 0.20  | -0.35 | 0.00  | -0.03 | -0.54 | -1.08 | 0.14  | -0.56 |
| LOC505C1  | 51013  | NM_016046    | 10904 | -0.96 | -0.95 | -0.27 | -0.98 | -0.51 | -0.74 | -0.60 | -0.75 | 0.79  | -2.27 | -2.23 | -0.56 |
| PM1       | 969    | NM_016076    | 10905 | 0.16  | 0.06  | 0.08  | 0.16  | 0.06  | 0.19  | 0.06  | 0.19  | 0.06  | 0.16  | 0.06  | -0.56 |
| LOC400757 | 400757 | NM_001013674 | 10906 | 0.06  | -0.12 | 0.31  | 1.22  | 1.18  | 0.09  | -0.29 | -0.60 | 0.33  | 0.25  | 2.49  | -0.57 |
| LOCXD4    | 3233   | NM_014621    | 10907 | -0.94 | -0.76 | -0.93 | -1.08 | -1.20 | -0.85 | -0.24 | -0.15 | -0.18 | -2.62 | -3.14 | -0.57 |
| LOCXN1    | 5367   | NM_002673    | 10908 | -0.68 | -0.68 | -0.07 | -0.62 | -0.65 | -0.07 | -0.62 | -0.65 | -0.07 | -0.57 | -0.24 | -0.57 |
| TNIP1     | 10318  | NM_006058    | 10909 | 0.62  | 0.67  | -1.03 | 0.03  | -0.83 | -1.41 | 0.42  | -0.27 | 0.12  | 2.21  | 2.17  | -0.57 |
| ZNF161    | 7716   | NM_007146    | 10910 | 0.18  | 0.07  | -0.64 | 0.25  | 0.17  | 0.16  | -0.03 | 0.19  | -0.72 | -0.38 | 0.58  | -0.57 |
| SLC3A12   | 6539   | NM_003044    | 10911 | -0.26 | -1.07 | -1.04 | -0.78 | -0.94 | -0.68 | -0.28 | -0.40 | -0.44 | -2.37 | -2.39 | -0.57 |
| MCC120223 | 943    | NM_032223    | 10912 | 0.01  | -0.48 | -0.35 | 0.04  | -0.44 | -0.34 | 0.04  | -0.44 | -0.34 | 0.15  | 1.71  | -0.57 |
| METTL3    | 56339  | NM_019852    | 10913 | 0.31  | -0.25 | 0.50  | 0.56  | -0.41 | 0.26  | -0.24 | -0.28 | -0.06 | 0.56  | 0.41  | -0.57 |
| LOC151394 | 151394 | NM_145280    | 10914 | 0.12  | 0.12  | 0.38  | 0.17  | 0.37  | 0.82  | -0.19 | -0.23 | -0.14 | 0.62  | 1.35  | -0.57 |
| LOC54909  | 54909  | NM_00102026  | 10915 | 0.54  | -0.12 | 0.48  | 0.12  | 0.12  | 0.48  | -0.12 | 0.12  | 0.48  | 0.12  | 0.96  | -0.57 |
| TUBB2     | 10383  | NM_006088    | 10916 | -0.31 | -0.32 | -0.14 | 0.37  | 1.56  | 0.07  | -0.21 | -0.39 | 0.03  | -0.77 | 1.86  | -0.57 |
| LOCN2     | 282626 | NM_178336    | 10917 | -0.84 | -0.67 | -0.80 | -1.29 | -1.06 | -0.79 | -0.22 | -0.19 | -0.16 | -2.31 | -3.15 | -0.57 |
| GA11      | 237    | NM_001480    | 10918 | 0.07  | 0.51  | 0.31  | 0.07  | 0.51  | 0.31  | 0.07  | 0.51  | 0.31  | 0.07  | 0.89  | -0.57 |
| NPC1      | 4864   | NM_000271    | 10919 | 0.03  | 0.60  | -0.60 | 0.00  | 0.38  | 0.08  | 0.39  | 0.21  | -0.30 | 0.03  | 0.31  | -0.57 |
| OR6C1     | 390321 | NM_00105182  | 10920 | 0.22  | 0.35  | -0.52 | 0.54  | -0.41 | -1.07 | -0.62 | 0.32  | -0.27 | 0.05  | -0.44 | -0.57 |
| LOC126295 | 126295 | NM_173480    | 10921 | -1.20 | -1.00 | -1.52 | -1.11 | -0.98 | -1.02 | -0.50 | -0.59 | -0.66 | -1.72 | -1.13 | -0.57 |
| PCBL1     | 908    | NM_005132    | 10922 | 0.07  | 0.23  | 0.16  | 0.43  | 0.47  | 0.05  | 0.40  | 0.13  | 0.00  | 0.78  | 0.78  | -0.57 |
| RAI17     | 57178  | NM_002038    | 10923 | 0.11  | 0.36  | 0.04  | 0.62  | 0.73  | 0.17  | -0.16 | -0.24 | -0.18 | 0.51  | 1.18  | -0.57 |
| STIL1P    | 114790 | NM_025902    | 10924 | -0.22 | 0.27  | -0.70 | -0.57 | 0.50  | 0.05  | 0.03  | 0.27  | -0.87 | 1.25  | -1.02 | -0.57 |
| CAF1      | 631    | NM_002011    | 10925 | 1.64  | -1.41 | -1.11 | 1.50  | -1.12 | -1.50 | -1.12 | -1.50 | -1.12 | -4.22 | -6.48 | -0.57 |
| LASS1     | 91012  | NM_147190    | 10926 | -0.29 | -0.53 | -0.34 | 0.05  | -0.10 | -0    |       |       |       |       |       |       |

|            |        |              |       |       |       |       |       |       |       |       |       |       |       |       |       |
|------------|--------|--------------|-------|-------|-------|-------|-------|-------|-------|-------|-------|-------|-------|-------|-------|
| EPN81      | 1947   | NM_004429    | 11009 | -1.22 | -1.69 | -1.04 | -1.12 | -2.60 | -1.94 | -0.75 | -0.82 | 0.96  | -3.95 | -5.65 | -0.60 |
| FOE2       | 44580  | NM_00303659  | 11010 | 0.33  | 0.74  | 1.27  | 0.27  | 0.83  | 1.08  | 0.26  | 0.27  | 2.34  | 1.74  | 2.28  | 0.68  |
| TMEM21A    | 146861 | NM_152462    | 11011 | -0.02 | -0.17 | -0.41 | 0.58  | -0.33 | 0.83  | 0.20  | -0.08 | -0.72 | -0.55 | 1.08  | -0.60 |
| CBORF21    | 280446 | NM_173683    | 11012 | -0.36 | -1.13 | 0.32  | -0.13 | -1.15 | -0.50 | -0.31 | -0.74 | 0.45  | -1.17 | -1.78 | -0.60 |
| NY-SAR-41  | 343099 | NM_206886    | 11013 | -0.89 | -0.42 | -0.42 | 0.18  | -0.55 | 0.39  | -0.69 | 0.34  | -0.26 | -1.72 | -0.01 | -0.60 |
| MAN        | 425    | NM_010418    | 11014 | 0.36  | 0.44  | -1.13 | -0.09 | -0.60 | -0.60 | -0.35 | 0.30  | -0.67 | -2.47 | 1.44  | -0.60 |
| ECSM2      | 641700 | NM_00107693  | 11015 | -0.16 | -0.16 | 0.37  | 0.99  | 0.36  | 0.84  | -0.50 | 0.01  | -0.11 | 0.37  | 2.18  | -0.60 |
| BHM85      | 27319  | NM_152414    | 11016 | -1.11 | -1.04 | -1.21 | -1.48 | -1.72 | -1.39 | -0.29 | 0.20  | -0.51 | -3.36 | -4.59 | -0.60 |
| SFTFC      | 640    | NM_000018    | 11017 | 0.40  | 0.50  | 0.00  | 0.10  | 0.50  | 0.00  | -0.12 | 0.00  | -0.12 | 0.67  | 0.04  | -0.60 |
| MAGEA1     | 4100   | NM_004988    | 11018 | -0.38 | -0.69 | -0.06 | 1.00  | 0.62  | 0.36  | -0.14 | -0.57 | 0.11  | -1.13 | 1.08  | -0.61 |
| FUJ1280    | 55793  | NM_001040217 | 11019 | -0.11 | -0.06 | 0.23  | 0.46  | 0.29  | 0.52  | -0.41 | -0.08 | -0.12 | 0.05  | 1.27  | -0.61 |
| SL121315   | 121315 | NM_000000    | 11020 | -1.12 | -0.16 | 0.56  | 0.23  | -0.06 | -0.56 | 0.23  | -0.06 | -0.56 | -0.69 | -1.87 | -0.61 |
| DMXK1      | 127343 | NM_172225    | 11021 | -0.39 | -0.44 | -0.30 | -0.76 | 0.03  | -0.88 | -0.11 | -0.41 | -0.41 | -1.13 | -0.51 | -0.61 |
| CART       | 9607   | NM_004291    | 11022 | -1.47 | -1.41 | -1.25 | -0.69 | -1.17 | 1.49  | -0.58 | 0.69  | -0.72 | -4.13 | -0.37 | -0.61 |
| SL2786     | 28965  | NM_014031    | 11023 | 1.04  | 0.94  | 0.03  | 0.87  | 1.65  | 0.72  | 0.17  | -0.38 | -0.41 | 2.01  | 3.24  | -0.61 |
| NAR2       | 465    | NM_005967    | 11024 | 0.45  | 0.16  | -0.40 | 0.08  | -0.24 | 1.65  | 0.10  | 0.12  | 0.62  | 0.01  | 1.49  | -0.61 |
| ADCY6      | 112    | NM_020983    | 11025 | -0.35 | -0.09 | -0.23 | 0.02  | -0.27 | 0.61  | -0.39 | 0.26  | -0.48 | -0.49 | 0.36  | -0.61 |
| SVZC       | 22887  | NM_016479    | 11026 | -0.60 | -0.59 | -0.80 | -1.54 | -1.00 | -1.22 | 0.21  | -0.38 | -0.44 | -2.00 | -3.76 | -0.61 |
| CG-127     | 51646  | NM_010661    | 11027 | -0.14 | -0.11 | 0.52  | 0.66  | 1.06  | 0.42  | -0.42 | -0.61 | 0.43  | 0.27  | 2.14  | -0.61 |
| DSCL1      | 27185  | NM_001012959 | 11028 | -0.41 | -0.28 | 0.15  | -0.13 | 0.36  | -0.34 | -0.69 | -0.27 | 0.35  | -0.55 | 0.12  | -0.61 |
| EF355      | 8665   | NM_003754    | 11029 | -0.27 | -0.17 | -0.28 | -0.02 | 0.24  | 0.17  | -0.26 | 0.02  | -0.37 | -0.72 | 0.40  | -0.61 |
| ACTL       | 431705 | NM_001002036 | 11030 | -0.19 | -0.46 | -0.69 | 0.01  | -0.33 | -0.43 | 0.04  | -0.30 | -0.35 | -1.34 | -0.75 | -0.61 |
| PCDHG5     | 56997  | NM_032407    | 11031 | -0.23 | -0.48 | -0.66 | -0.65 | -0.45 | -0.23 | 0.40  | -0.42 | -0.50 | -1.38 | -1.33 | -0.61 |
| SPRY05     | 84767  | NM_032681    | 11032 | 2.82  | 9.50  | 6.83  | 7.33  | 7.90  | 7.26  | 0.51  | -0.24 | 0.14  | 19.15 | 22.49 | -0.61 |
| SL25A18    | 83733  | NM_031481    | 11033 | -0.39 | 0.18  | -0.60 | 0.09  | 0.22  | -0.56 | -0.54 | -0.23 | 0.16  | -0.81 | -0.25 | -0.61 |
| SL25A4     | 122300 | NM_145048    | 11034 | -0.46 | 0.44  | 0.11  | -0.06 | 0.70  | 0.11  | -0.61 | 0.06  | 0.09  | 0.74  | 0.74  | -0.61 |
| RABF2      | 79874  | NM_024816    | 11035 | -0.57 | 0.01  | -0.33 | 0.08  | 0.12  | 0.13  | -0.53 | 0.02  | -0.10 | -0.89 | 0.33  | -0.61 |
| PF4        | 5196   | NM_002019    | 11036 | 0.51  | 0.61  | 0.41  | 1.13  | 0.17  | 0.88  | -0.52 | 0.13  | -0.22 | 1.53  | 2.18  | -0.61 |
| LOC1502    | 90417  | NM_020286    | 11037 | 0.49  | 1.31  | 1.85  | 0.49  | 1.18  | 0.56  | 0.18  | 0.56  | 2.65  | 3.84  | 0.61  | -0.61 |
| LOC196541  | 196541 | NM_001010977 | 11038 | 2.23  | 0.30  | -0.22 | 0.70  | 0.80  | 0.65  | 0.52  | -0.56 | -0.57 | 2.31  | 2.15  | -0.61 |
| PHF20      | 51320  | NM_016436    | 11039 | 0.22  | 0.51  | -0.32 | 0.65  | 0.33  | -0.27 | -0.49 | 0.32  | -0.44 | 0.41  | 0.71  | -0.61 |
| LOC644     | 2387   | NM_0050778   | 11040 | 0.65  | 0.75  | 0.22  | 0.76  | 0.62  | 1.32  | -0.23 | 0.22  | 1.92  | 0.62  | 3.87  | -0.61 |
| MVPCL1     | 4604   | NM_206821    | 11041 | 0.51  | 0.39  | 1.18  | -0.20 | 0.32  | 0.31  | -0.34 | -0.49 | 0.21  | 0.29  | 0.43  | -0.61 |
| FRAT1      | 10023  | NM_181355    | 11042 | 0.10  | 0.32  | 0.28  | 0.77  | 0.23  | 0.31  | -0.56 | 0.06  | 0.01  | 0.70  | 1.31  | -0.61 |
| GMEB3      | 10695  | NM_020482    | 11043 | -1.02 | -1.15 | -1.11 | -0.88 | -0.11 | -0.51 | -1.12 | -0.20 | -0.29 | -3.31 | -1.50 | -0.61 |
| FL18300    | 38980  | NM_014046    | 11044 | 0.16  | 0.08  | 0.12  | 0.17  | 0.29  | 0.62  | 0.37  | -0.12 | 0.42  | 0.36  | 1.01  | -0.61 |
| DFZP678121 | 201626 | NM_177966    | 11045 | -0.40 | -1.01 | 0.88  | 1.42  | 0.81  | 1.55  | 0.23  | -1.04 | 0.20  | -0.53 | 3.79  | -0.61 |
| ADAMTS9    | 56999  | NM_182920    | 11046 | 0.24  | 0.02  | -0.47 | -0.25 | -0.30 | -0.05 | 0.04  | -0.08 | -0.58 | -0.21 | -0.60 | -0.62 |
| RASL1      | 5927   | NM_000506    | 11047 | 0.52  | 0.32  | 0.14  | -0.16 | 0.49  | -0.16 | -0.55 | -0.49 | -0.16 | 0.76  | 0.25  | -0.62 |
| DNAH5      | 1767   | NM_001369    | 11048 | -0.06 | 0.45  | 0.69  | 1.42  | 1.55  | 1.28  | -0.35 | -0.34 | 0.07  | 1.08  | 4.25  | -0.62 |
| DM93       | 3421   | NM_004135    | 11049 | -0.94 | -1.15 | -0.70 | -0.62 | -0.99 | -0.38 | -0.80 | -0.68 | 0.86  | -2.79 | -1.99 | -0.62 |
| ZNF237     | 9205   | NM_00503849  | 11050 | 0.35  | -0.57 | 0.60  | 0.35  | -0.67 | 0.58  | 0.27  | 0.58  | 0.87  | 0.87  | 1.84  | -0.62 |
| SCD1       | 6341   | NM_004589    | 11051 | -0.71 | -1.04 | -0.95 | -0.55 | -1.31 | -0.59 | -0.43 | -0.08 | -0.11 | -2.45 | -0.42 | -0.62 |
| CDH20      | 28316  | NM_031891    | 11052 | -0.14 | 0.60  | -0.45 | -0.26 | 0.02  | 0.66  | 0.21  | -0.25 | -0.58 | 0.01  | 0.42  | -0.62 |
| APBB1P     | 54538  | NM_019043    | 11053 | -0.78 | -0.46 | -0.75 | -0.43 | -0.59 | -0.68 | -0.59 | 0.31  | -0.34 | -1.99 | -3.70 | -0.62 |
| CD3P1      | 121130 | NM_206899    | 11054 | -0.17 | 0.46  | 0.42  | 0.46  | 0.81  | -0.20 | 0.20  | 0.20  | 0.20  | 1.09  | 0.87  | -0.62 |
| SP1        | 9961   | NM_005115    | 11055 | 0.18  | 0.48  | 0.72  | 1.10  | 0.43  | 0.12  | -0.69 | -0.69 | -0.79 | 1.38  | 3.64  | -0.62 |
| SP7        | 24571  | NM_001008779 | 11056 | -0.60 | -0.56 | -0.89 | -0.12 | 0.02  | 0.19  | -0.19 | 0.00  | -0.43 | 2.05  | 0.09  | -0.62 |
| ZNF40007   | 9781   | NM_000000    | 11057 | 1.04  | 0.41  | 1.71  | 1.04  | 4.24  | 2.24  | 0.24  | 0.24  | 0.24  | 3.16  | 3.11  | -0.62 |
| SP8        | 221833 | NM_182700    | 11058 | 0.59  | -0.31 | 0.07  | 1.13  | -0.68 | 0.16  | -0.58 | 0.06  | -0.10 | 0.35  | 0.61  | -0.62 |
| PKCZG      | 5288   | NM_004070    | 11059 | -0.49 | 0.03  | -0.34 | -0.09 | 0.24  | -0.15 | -0.52 | -0.09 | -0.01 | -0.80 | 0.00  | -0.62 |
| ZNF252     | 25220  | NM_00303936  | 11060 | 0.41  | 0.01  | 0.63  | 0.21  | -0.85 | 1.39  | -0.21 | -0.21 | 0.87  | 1.03  | 1.47  | -0.62 |
| ZRANB3     | 84083  | NM_032143    | 11061 | -0.07 | 0.13  | -0.39 | -0.33 | -0.25 | -0.48 | -0.20 | -0.16 | -0.26 | -1.06 | -0.62 | -0.62 |
| CB1        | 10519  | NM_006384    | 11062 | -0.28 | -0.19 | -0.57 | -0.12 | 0.05  | 0.34  | -0.46 | -0.27 | 0.11  | -1.04 | -0.42 | -0.62 |
| MGC20579   | 348013 | NM_182614    | 11063 | -0.88 | -0.75 | -0.05 | 0.59  | -0.18 | -0.24 | -0.12 | -0.42 | -0.09 | -0.12 | 0.64  | -0.62 |
| SAMD6      | 202386 | NM_020551    | 11064 | 0.45  | 0.39  | 0.02  | 0.46  | -0.08 | -0.34 | -0.08 | -0.34 | 0.06  | 1.12  | 1.12  | -0.62 |
| MGC6093    | 80776  | NM_030578    | 11065 | 0.52  | -0.08 | 0.22  | 0.21  | 0.53  | 0.93  | 0.10  | -0.40 | -0.32 | 0.67  | -1.62 | -0.62 |
| PAMC1      | 9132   | NM_005447    | 11066 | -0.32 | -0.52 | -0.46 | -0.33 | -0.96 | 0.72  | -0.20 | -0.19 | -0.24 | -1.29 | -2.01 | -0.62 |
| MGAP3      | 6413   | NM_034966    | 11067 | 0.19  | 0.19  | 0.20  | 0.17  | 0.19  | 0.45  | 0.15  | 0.15  | 0.15  | 0.62  | 0.58  | -0.62 |
| HMGN4      | 10473  | NM_006353    | 11068 | -0.14 | 0.59  | -0.24 | 0.16  | -0.43 | -0.18 | -0.33 | 0.13  | -0.43 | 0.21  | 0.45  | -0.62 |
| FRM2       | 2334   | NM_002025    | 11069 | -0.43 | -0.61 | 0.06  | 0.27  | 0.06  | 1.10  | -0.13 | -0.02 | -0.48 | -0.98 | 0.79  | -0.62 |
| RLA4L14    | 5487   | NM_000024    | 11070 | 0.06  | 0.01  | 0.38  | 0.12  | 0.65  | 1.27  | 0.67  | -0.17 | 0.25  | 0.45  | 2.04  | -0.62 |
| ENO3       | 2027   | NM_053013    | 11071 | 0.33  | 1.36  | 0.04  | 1.94  | 1.71  | 0.08  | -0.82 | -0.21 | 0.41  | 1.07  | 3.73  | -0.63 |
| NOTCH1     | 4851   | NM_017617    | 11072 | -0.06 | -0.33 | -0.51 | -0.26 | -0.72 | -0.60 | -0.29 | -0.02 | -0.31 | -0.91 | -1.57 | -0.63 |
| SSI        | 6750   | NM_001048    | 11073 | 1.04  | 1.84  | 0.54  | 2.92  | 2.20  | 2.94  | -0.06 | 0.10  | -0.66 | 3.42  | 8.06  | -0.63 |
| RSK1       | 5572   | NM_017048    | 11074 | 0.31  | 0.11  | 0.01  | -0.37 | -0.19 | -0.50 | -0.17 | -0.17 | -0.17 | -0.47 | 1.54  | -0.63 |
| LOC41108   | 441108 | NM_001013717 | 11075 | 0.20  | -0.05 | -0.09 | -0.16 | -0.11 | 0.46  | -0.20 | -0.17 | -0.26 | 0.06  | 0.51  | -0.63 |
| LOC89894   | 89894  | NM_138341    | 11076 | -0.46 | -0.13 | 0.79  | 0.41  | 0.39  | 0.71  | 0.01  | -0.51 | -0.12 | 1.11  | 1.52  | -0.63 |
| GLI2       | 112189 | NM_000732    | 11077 | 0.67  | 0.23  | 0.63  | 0.67  | 0.67  | 0.89  | 0.30  | 0.16  | 0.89  | 0.77  | 1.84  | -0.63 |
| CR1C2      | 200186 | NM_183715    | 11078 | -0.57 | -0.31 | -0.63 | 0.19  | 0.00  | -0.16 | -0.69 | 0.45  | -0.39 | -1.51 | 0.02  | -0.63 |
| MGC34132   | 282203 | NM_173654    | 11079 | 0.34  | 0.14  | 0.30  | 0.12  | -0.33 | 0.33  | 0.08  | -0.37 | -0.33 | 0.50  | 0.13  | -0.63 |
| GDF8       | 2460   | NM_000800    | 11080 | -0.30 | -1.13 | -0.50 | -0.81 | -0.40 | -0.80 | -0.41 | -0.41 | -0.41 | -2.01 | -1.22 | -0.63 |
| GPR82      | 27197  | NM_080817    | 11081 | 0.69  | 0.11  | -0.20 | -0.13 | -0.30 | -0.46 | -0.46 | -0.13 | 0.04  | 1.04  | -0.88 | -0.63 |
| C10RF29    | 10964  | NM_006820    | 11082 | -1.18 | -0.07 | -0.72 | 0.72  | 1.29  | 1.02  | 0.87  | -0.67 | -0.83 | 0.39  | 3.04  | -0.63 |
| ZNF499     | 84878  | NM_032792    | 11083 | -0.02 | 1.54  | 0.29  | 0.26  | 1.18  | 0.87  | -0.49 | 0.08  | -0.22 | 1.81  | 2.31  | -0.63 |
| ZNF1265    | 7993   | NM_018477    | 11084 | 0.40  | 0.24  | 1.11  | 0.90  | 0.41  | 0.07  | 0.68  | -0.56 | 1.27  | 2.98  | 0.63  | -0.63 |
| PRMT7      | 54496  | NM_019023    | 11085 | -0.34 | -0.82 | -0.82 | -1.17 | -0.74 | -0.89 | -0.03 | -0.53 | -0.07 | -1.98 | -1.80 | -0.63 |
| SLC39A4    | 55630  | NM_130849    | 11086 | 0.16  | -0.33 | 0.95  | 1.44  | 1.29  | 0.05  | -0.39 | -0.55 | 0.31  | 0.79  | 2.78  | -0.63 |
| C12orf29   | 5557   | NM_003546    | 11087 | 0.15  | 0.51  | -0.58 | 0.62  | 0.62  | 0.95  | 0.62  | 0.62  | 0.62  | 0.34  | 2.19  | -0.63 |
| PANK3      | 79646  | NM_024594    | 11088 | -0.40 | -0.27 | 0.14  | 0.07  | -0.51 | -0.26 | -0.   |       |       |       |       |       |

|           |        |              |       |       |       |       |       |       |       |       |       |       |       |       |       |       |
|-----------|--------|--------------|-------|-------|-------|-------|-------|-------|-------|-------|-------|-------|-------|-------|-------|-------|
| C14r45    | 448834 | NM_001025231 | 11171 | -0.63 | -1.81 | -1.40 | -0.98 | -2.93 | -1.89 | 0.10  | -0.32 | -0.43 | -3.84 | -5.80 | -0.66 |       |
| BMF       | 90427  | NM_002030843 | 11172 | 0.76  | 0.26  | 0.10  | 0.06  | 0.79  | 0.26  | -0.17 | 0.30  | -0.22 | -0.60 | 0.78  | -0.66 |       |
| CGORF210  | 57107  | NM_0200381   | 11173 | 0.04  | 0.32  | -0.18 | 0.24  | -0.02 | 1.31  | -0.18 | 0.18  | -0.66 | 1.18  | 1.53  | -0.66 |       |
| BMP15     | 9210   | NM_0050448   | 11174 | 0.12  | 0.91  | 1.65  | 2.29  | 1.93  | 0.90  | -0.67 | -0.39 | 0.41  | 2.68  | 5.12  | -0.66 |       |
| AHG52     | 130872 | NM_152592    | 11175 | -0.74 | -0.15 | -0.55 | -0.73 | 0.54  | 0.63  | -0.46 | 0.09  | -0.29 | -1.44 | 0.43  | -0.66 |       |
| COOR4     | 135    | NM_020074    | 11176 | 0.18  | 0.29  | 0.09  | 0.19  | 0.24  | 0.82  | -0.24 | -0.52 | 0.34  | 0.19  | 1.97  | -0.66 |       |
| TMPPR54   | 56649  | NM_183247    | 11177 | 0.32  | -0.17 | 0.02  | 0.61  | -0.45 | -0.12 | -0.39 | -0.15 | -0.12 | 0.16  | 0.04  | -0.66 |       |
| SOCS3     | 9021   | NM_003995    | 11178 | -0.48 | -0.41 | 0.53  | 0.78  | 1.35  | 1.61  | -0.29 | -0.49 | 0.12  | -0.37 | 3.74  | -0.66 |       |
| WHSC2     | 7469   | NM_005663    | 11179 | 0.86  | 0.91  | 0.66  | 0.81  | 0.79  | 0.62  | 0.27  | 0.39  | 0.63  | 0.83  | 0.59  | -0.66 |       |
| KCTD18    | 130535 | NM_152387    | 11180 | -0.43 | 0.02  | -0.11 | -0.86 | 0.37  | 0.12  | -0.13 | -0.49 | -0.05 | -0.52 | -0.37 | -0.66 |       |
| KCTD9     | 54793  | NM_017634    | 11181 | 0.60  | 0.33  | -0.67 | 0.35  | 0.21  | -0.26 | -0.06 | -0.11 | -0.49 | 0.26  | 0.29  | -0.66 |       |
| FLJ2825   | 14887  | NM_014902    | 11182 | -0.62 | -0.73 | -0.24 | -0.47 | 0.13  | -0.13 | -0.13 | -0.13 | -0.13 | -1.11 | -1.17 | -0.66 |       |
| LOC401272 | 9729   | NM_014702    | 11183 | 0.93  | 0.11  | -0.52 | -0.78 | -0.22 | 0.31  | -0.19 | -0.52 | 0.12  | -0.28 | 1.56  | -1.28 | -0.66 |
| IRRC39    | 127495 | NM_144620    | 11184 | 0.13  | 0.52  | -0.13 | 0.76  | 0.15  | 0.41  | -0.63 | 0.26  | -0.29 | -0.52 | 1.02  | -0.66 |       |
| GC2       | 9648   | NM_014635    | 11185 | -0.85 | -1.25 | -0.09 | -0.17 | -0.55 | -0.07 | -0.49 | -0.71 | 0.54  | -2.19 | -0.79 | -0.66 |       |
| DNPEP     | 23549  | NM_012100    | 11186 | 0.91  | -0.19 | 0.63  | 1.43  | 0.40  | 0.18  | -0.26 | -0.53 | 0.31  | 1.35  | 2.01  | -0.66 |       |
| VEGFC     | 7424   | NM_005429    | 11187 | -1.13 | -0.13 | 0.35  | 0.10  | -0.17 | 0.13  | -0.77 | -0.24 | 0.34  | -0.90 | 0.06  | -0.66 |       |
| TEV9      | 374638 | NM_198524    | 11188 | -0.43 | 0.50  | -0.20 | 0.31  | -0.46 | -0.29 | -0.67 | 0.10  | -0.09 | -0.13 | -0.45 | -0.66 |       |
| HWK42     | 2359   | NM_000735    | 11189 | -1.04 | 0.03  | -0.49 | -0.42 | 0.13  | -0.64 | -0.87 | -0.06 | 0.21  | -1.50 | 0.94  | -0.66 |       |
| LOC91689  | 91689  | NM_033318    | 11190 | -0.23 | 0.31  | -0.18 | -0.12 | -0.12 | 0.18  | -0.38 | 0.06  | -0.35 | -0.10 | -0.05 | -0.67 |       |
| PRKWN1    | 65125  | NM_018979    | 11191 | -0.54 | -0.75 | -0.98 | -0.46 | -1.00 | -0.90 | -0.23 | -0.13 | -0.31 | -2.28 | -2.35 | -0.67 |       |
| MRP9      | 29524  | NM_015460    | 11192 | 0.13  | 0.13  | -0.21 | 0.38  | -0.18 | 1.36  | -0.51 | 0.33  | -0.48 | 0.05  | 1.56  | -0.67 |       |
| MT1       | 4485   | NM_020998    | 11193 | -0.38 | -0.07 | -0.37 | -0.46 | -0.23 | -0.56 | -0.39 | -0.26 | -0.01 | -0.82 | -1.26 | -0.67 |       |
| KIAA1219  | 57148  | NM_020336    | 11194 | -0.48 | -0.38 | -0.74 | 0.37  | -0.42 | -0.11 | -0.29 | 0.10  | -0.47 | -1.60 | -1.07 | -0.67 |       |
| RMF4      | 80336  | NM_025126    | 11195 | -1.19 | -0.80 | -0.59 | -1.31 | -1.36 | -1.32 | -0.52 | -0.36 | 0.22  | -2.57 | -3.99 | -0.67 |       |
| SN4       | 51804  | NM_017420    | 11196 | 0.02  | -0.77 | 0.15  | 0.55  | 0.33  | -0.07 | -0.19 | -0.88 | 0.40  | -0.60 | 0.80  | -0.67 |       |
| ZNF595    | 152887 | NM_182524    | 11197 | -0.55 | -0.36 | 0.25  | -0.22 | -0.65 | -0.21 | -0.60 | -0.33 | 0.26  | -0.66 | -1.08 | -0.67 |       |
| ITGA11    | 22801  | NM_012211    | 11198 | -0.15 | 1.14  | 0.50  | 0.94  | 3.23  | 3.28  | -0.47 | 0.68  | -0.88 | 1.48  | 7.45  | -0.67 |       |
| DOP1      | 11794  | NM_013381    | 11199 | 0.81  | 0.81  | 0.61  | 1.22  | 1.16  | 1.61  | -0.16 | -0.46 | 0.16  | 1.99  | 1.87  | -0.67 |       |
| CYP3A4    | 1576   | NM_017460    | 11200 | -0.48 | -0.33 | -0.26 | 0.60  | -0.42 | -0.66 | -0.72 | -0.21 | 0.26  | -1.07 | -0.48 | -0.67 |       |
| ABBP3     | 25890  | NM_015429    | 11201 | 1.12  | 0.41  | -0.29 | 0.25  | -0.19 | 0.37  | 0.21  | -0.25 | -0.64 | 1.25  | 0.42  | -0.67 |       |
| FLJ3882   | 16887  | NM_173538    | 11202 | 0.10  | 0.89  | 0.40  | -0.19 | 0.40  | -0.21 | -0.09 | 0.10  | -0.73 | 1.31  | 1.17  | -0.67 |       |
| SLOC21    | 6578   | NM_005630    | 11203 | -0.36 | -0.27 | 0.03  | 0.03  | 0.28  | 0.37  | -0.17 | -0.17 | -0.33 | -0.60 | 0.68  | -0.67 |       |
| JARID1A   | 5927   | NM_005056    | 11204 | -0.01 | 0.18  | -0.25 | -1.09 | 2.41  | -0.52 | -0.64 | -0.45 | 0.42  | -0.08 | 2.98  | -0.67 |       |
| PDI1      | 5537   | NM_002862    | 11205 | -0.32 | -0.09 | 0.22  | -0.35 | 0.60  | 0.01  | -0.17 | -0.56 | 0.06  | -0.20 | 0.26  | -0.67 |       |
| LOC283129 | 283129 | NM_001037225 | 11206 | -0.09 | -0.56 | 0.03  | -0.60 | 0.83  | 0.15  | -0.75 | 0.43  | 0.44  | 0.44  | 1.69  | -0.67 |       |
| MRR27     | 23107  | NM_015084    | 11207 | 0.40  | 0.24  | -0.68 | -0.46 | 0.17  | 0.00  | 0.38  | -0.29 | 0.77  | -0.05 | -0.29 | -0.67 |       |
| ONTNG     | 27255  | NM_014661    | 11208 | -0.55 | -1.06 | 0.12  | -0.14 | -0.66 | -0.50 | -0.41 | -0.74 | -0.46 | -1.49 | -1.30 | -0.67 |       |
| NR6A1     | 4729   | NM_030529    | 11209 | 0.13  | 0.17  | 0.07  | 0.17  | 0.17  | 0.17  | 0.17  | 0.17  | 0.17  | 2.43  | 6.91  | -0.67 |       |
| KIAA0712  | 9677   | NM_001024663 | 11210 | 0.05  | 0.38  | -0.63 | -0.08 | 0.23  | -0.61 | -0.35 | -0.07 | -0.26 | -0.20 | -0.31 | -0.68 |       |
| CR        | 9541   | NM_004882    | 11211 | -0.07 | -0.07 | -0.39 | 0.25  | 0.39  | 0.06  | -0.20 | -0.21 | -0.27 | -0.40 | 0.69  | -0.68 |       |
| DFP7C1616 | 65826  | NM_001027236 | 11212 | -0.01 | -0.07 | -0.17 | 0.19  | 0.48  | 0.06  | -0.07 | 0.17  | 0.32  | 0.63  | 0.03  | -0.68 |       |
| HEL308    | 115150 | NM_133636    | 11213 | 0.22  | -0.28 | 0.32  | 1.12  | 0.81  | 0.83  | 0.18  | -0.66 | -0.20 | 0.26  | 2.77  | -0.68 |       |
| CSTA      | 1475   | NM_005213    | 11214 | 0.15  | 0.21  | -0.98 | 0.06  | 0.14  | -0.37 | 0.03  | 0.05  | -0.76 | -0.62 | -0.17 | -0.68 |       |
| APF33     | 130494 | NM_00193969  | 11215 | -0.96 | -0.12 | -0.94 | -0.90 | -0.45 | -0.80 | -0.44 | 0.14  | -0.38 | -2.02 | -1.85 | -0.68 |       |
| 118       | CNC    | NM_012737    | 11216 | 0.32  | 0.53  | 0.56  | 0.68  | 2.05  | 0.02  | 0.35  | 0.02  | 0.35  | 2.41  | 3.96  | -0.68 |       |
| SPANK1    | 171490 | NM_133019    | 11217 | 0.14  | -0.34 | -0.42 | 0.42  | 0.66  | 0.46  | 0.15  | -0.37 | -0.46 | -0.62 | 1.54  | -0.68 |       |
| TRF197    | 10168  | NM_001024855 | 11218 | 0.03  | 0.07  | -0.69 | -0.62 | -0.62 | -0.57 | -0.40 | -0.02 | -0.62 | -0.58 | -1.71 | -0.68 |       |
| DOR27     | 5485   | NM_012947    | 11219 | 0.25  | 0.25  | 0.68  | -0.46 | -0.38 | -0.42 | -0.42 | -0.42 | -0.42 | -0.42 | -0.42 | -0.68 |       |
| ASPN      | 54829  | NM_017680    | 11220 | -0.44 | -0.03 | -0.32 | -0.72 | 0.52  | -0.48 | -0.19 | -0.44 | -0.05 | -0.79 | -0.69 | -0.68 |       |
| RPK1      | 8737   | NM_003904    | 11221 | 0.10  | -0.57 | 0.14  | 0.59  | 0.56  | -0.39 | -0.09 | -0.68 | 0.10  | -0.33 | 0.76  | -0.68 |       |
| EDP9      | 530    | NM_012070    | 11222 | -0.75 | -0.92 | -0.72 | -0.52 | -0.72 | -0.52 | -0.72 | -0.52 | -0.72 | -2.36 | -1.29 | -0.68 |       |
| C10BP     | 708    | NM_001212    | 11223 | 0.01  | 0.09  | 0.28  | 0.36  | 0.29  | 0.88  | -0.29 | -0.06 | -0.34 | 0.19  | 1.53  | -0.68 |       |
| MT1       | 4351   | NM_002435    | 11224 | 0.53  | 0.66  | -0.50 | 1.24  | 1.37  | 0.73  | 0.03  | -0.04 | -0.67 | 0.69  | 3.35  | -0.68 |       |
| ATPI      | 11101  | NM_001001976 | 11225 | 0.12  | 1.46  | 0.76  | 0.29  | 1.49  | 2.05  | -0.57 | 0.29  | -0.40 | 2.34  | 3.83  | -0.68 |       |
| MRP48     | 8889   | NM_176800    | 11226 | -0.64 | -0.52 | -0.62 | -0.73 | -0.71 | -0.64 | -0.22 | -0.44 | -0.89 | -1.83 | 2.28  | -0.68 |       |
| KNS2      | 3881   | NM_182923    | 11227 | -0.21 | 0.03  | 0.22  | -0.27 | 0.61  | 0.58  | -0.16 | -0.07 | -0.45 | 0.04  | 1.46  | -0.68 |       |
| LOC388199 | 388199 | NM_001013638 | 11228 | -0.70 | -0.27 | -1.13 | -0.69 | 0.16  | 0.16  | -0.73 | 0.81  | 0.77  | -2.10 | -0.37 | -0.68 |       |
| CASRN1    | 5724   | NM_00100874  | 11229 | -0.67 | -1.00 | -0.76 | -0.67 | -1.00 | -0.76 | -0.67 | -1.00 | -0.76 | -2.02 | -2.63 | -0.68 |       |
| TNMF5138  | 23495  | NM_012452    | 11230 | 0.21  | -0.77 | -0.15 | 0.54  | 0.25  | -0.27 | -0.05 | -0.63 | 0.00  | -0.70 | 0.51  | -0.68 |       |
| PCDH17    | 27253  | NM_014549    | 11231 | -0.20 | -0.45 | 0.36  | 0.66  | 0.31  | 0.99  | 0.03  | -0.56 | -0.16 | -0.29 | 1.97  | -0.68 |       |
| SPR5      | 1725   | NM_013407    | 11232 | 0.02  | -0.51 | -0.40 | -0.07 | 0.04  | -0.24 | -0.08 | -0.71 | -0.22 | -0.51 | -0.43 | -0.68 |       |
| TNMF4     | 7304   | NM_004617    | 11233 | 0.86  | 1.00  | -0.94 | -1.10 | -0.97 | -0.90 | -0.47 | -0.22 | 0.01  | -2.70 | -2.96 | -0.68 |       |
| KIAA079   | 23076  | NM_015056    | 11234 | -0.39 | 0.09  | -0.33 | -0.13 | -0.55 | -0.17 | -0.49 | -0.09 | -0.11 | -0.63 | -0.85 | -0.68 |       |
| SNFG1     | 54212  | NM_018967    | 11235 | -0.58 | -0.41 | -0.78 | -0.08 | -0.58 | -0.50 | 0.07  | -0.32 | -0.43 | -1.77 | -1.97 | -0.68 |       |
| CH11      | 347458 | NM_001004651 | 11236 | 0.43  | 0.48  | 0.33  | 0.65  | 0.39  | 0.65  | 0.19  | -0.60 | 0.31  | 0.68  | 0.58  | -0.68 |       |
| NUDT3     | 11165  | NM_006703    | 11237 | -0.27 | -0.68 | -0.88 | -0.05 | 0.26  | -0.90 | -0.10 | -0.67 | 0.09  | -1.83 | -0.70 | -0.69 |       |
| PRARG18   | 13552  | NM_133263    | 11238 | -0.39 | -0.73 | -0.27 | -1.07 | -0.71 | -0.74 | -0.23 | -0.37 | -0.09 | -1.43 | -2.52 | -0.69 |       |
| SP1       | 9519   | NM_000885    | 11239 | 0.40  | 0.11  | 0.29  | 0.17  | 0.20  | 0.17  | 0.17  | 0.17  | 0.17  | 0.17  | 0.17  | -0.69 |       |
| FLJ1106   | 80167  | NM_001039917 | 11240 | -0.40 | -0.67 | -0.87 | -0.48 | 0.81  | -0.61 | -0.34 | -1.03 | 0.00  | -1.91 | -0.27 | -0.69 |       |
| FAT       | 2195   | NM_005245    | 11241 | -1.17 | -1.13 | -1.34 | -1.92 | -1.61 | -0.72 | 0.00  | 0.31  | -0.99 | -3.63 | -4.24 | -0.69 |       |
| LOC22380  | 6457   | NM_020765    | 11242 | 0.01  | -0.15 | 1.23  | 1.05  | 0.79  | 0.55  | 0.26  | 0.26  | 0.26  | 0.26  | 2.39  | -0.69 |       |
| FLJ1061   | 55199  | NM_152563    | 11243 | 0.77  | 0.74  | 0.86  | 1.69  | 1.07  | 1.08  | -0.30 | -0.11 | -0.28 | 2.38  | 3.85  | -0.69 |       |
| THEG2     | 8462   | NM_003597    | 11244 | -0.37 | -0.46 | -0.80 | 0.38  | 0.70  | 1.15  | -0.27 | -0.37 | -0.05 | -1.63 | -0.07 | -0.69 |       |
| MCC203    | 7900   | NM_020437    | 11245 | 0.80  | 0.11  | -0.22 | 0.64  | 0.31  | -0.38 | 0.14  | -0.32 | -0.52 | 0.69  | 1.14  | -0.69 |       |
| THF1      | 920    | NM_004740    | 11246 | 0.14  | 0.39  | 0.71  | 0.27  | 0.14  | 0.25  | 0.77  | 0.14  | -0.52 | 0.44  | 1.23  | -0.69 |       |
| SEBPN1    | 5265   | NM_001002035 | 11247 | -0.10 | 0.56  | -0.23 | 0.39  | 0.10  | 0.65  | 0.27  | 0.03  | -0.45 | 0.23  | 1.14  | -0.69 |       |
| CDR1      | 975    | NM_004356    | 11248 | 1.00  | 0.06  | 0.75  | 1.11  | 0.65  | 2.03  | 0.03  | -0.27 | -0.59 | 1.81  | 3.79  | -0.69 |       |
| FLJ12168  | 8014   | NM_030573    | 11249 | 0.74  | -0.75 | -0.45 | -0.47 | -0.45 | -0.45 | -0.45 | -0.45 | -0.45 | -1.46 | 1.68  | -0.69 |       |
| CHD1      | 1105   | NM_001270    | 11250 | 2.26  | 0.34  | -0.70 | 1.00  | 0.86  | 1.76  | 0.63  | -0.3  |       |       |       |       |       |

|            |        |             |       |       |       |       |        |       |       |       |       |       |       |       |       |
|------------|--------|-------------|-------|-------|-------|-------|--------|-------|-------|-------|-------|-------|-------|-------|-------|
| RMS2       | 9699   | NM_014677   | 11333 | 0.35  | 0.56  | -0.28 | 1.13   | 0.51  | 0.56  | -0.12 | -0.49 | -0.51 | 0.67  | 2.20  | -0.72 |
| BT0K       | 9015   | NM_012271   | 11334 | 1.05  | 0.06  | 0.24  | 1.12   | 0.22  | 0.84  | -0.16 | -0.31 | 0.28  | 1.38  | 1.21  | -0.71 |
| PCUM7      | 9360   | NM_213636   | 11335 | -0.32 | 0.01  | -0.56 | 0.59   | 0.83  | 0.34  | -0.53 | 0.46  | -0.63 | -0.87 | 1.75  | -0.72 |
| CD8A       | 8832   | NM_003874   | 11336 | -0.11 | 0.29  | -0.31 | 0.86   | -0.45 | 0.55  | -0.66 | 0.23  | -0.29 | -0.13 | 0.96  | -0.72 |
| PP5S16     | 10279  | NM_005865   | 11337 | 0.52  | 0.42  | 0.29  | 1.27   | 0.04  | 1.40  | -0.15 | -0.08 | -0.49 | 1.22  | 2.70  | -0.72 |
| CHM17      | 10234  | NM_003961   | 11338 | 0.26  | 0.33  | 1.17  | 0.62   | 2.24  | 1.74  | -0.56 | 0.70  | 0.56  | 1.76  | 0.07  | -0.72 |
| MGC11308   | 84975  | NM_032889   | 11339 | -0.11 | -0.17 | 0.23  | 0.72   | -0.31 | 0.33  | -0.39 | -0.34 | 0.00  | -0.25 | 0.75  | -0.72 |
| CAL83      | 795    | NM_004057   | 11340 | -0.47 | 0.15  | 0.16  | 1.04   | -0.02 | 0.03  | -0.25 | -0.13 | -0.07 | -0.16 | -0.19 | -0.72 |
| LOC121711  | 22171  | NM_00340274 | 11341 | 0.22  | 0.16  | 0.16  | 0.75   | -0.46 | 0.66  | -0.25 | -0.46 | 0.66  | -0.66 | 0.41  | -0.72 |
| GRP55      | 9290   | NM_005683   | 11342 | 0.16  | 0.18  | 0.50  | 0.89   | 0.70  | 0.70  | -0.26 | -0.36 | -0.10 | 0.84  | 2.28  | -0.72 |
| KIAA0980   | 22981  | NM_025176   | 11343 | 0.12  | 0.49  | 0.83  | 1.25   | 1.05  | 1.11  | -0.76 | -0.04 | 0.08  | 1.44  | 3.42  | -0.73 |
| IFP1B      | 5385   | NM_004557   | 11344 | -0.44 | -0.07 | 0.43  | 0.85   | 1.15  | 0.67  | -0.44 | -0.67 | -0.67 | -0.68 | -0.46 | -0.73 |
| PBP3CA     | 5305   | NM_005028   | 11345 | 0.06  | 0.23  | 0.12  | 0.07   | 0.04  | 0.18  | 0.41  | -0.24 | 0.07  | 0.28  | 0.07  | -0.73 |
| LOC346673  | 346673 | NM_182489   | 11346 | 0.27  | -0.32 | -0.03 | 0.53   | 0.00  | 0.07  | -0.21 | -0.34 | -0.17 | -0.08 | 0.60  | -0.73 |
| PTPRA      | 5796   | NM_080841   | 11347 | 0.47  | 0.15  | -0.89 | 0.27   | -0.21 | 0.00  | 0.23  | -0.21 | -0.74 | -0.26 | 0.05  | -0.73 |
| LOC22412   | 11608  | NM_153378   | 11348 | -0.28 | 0.30  | 0.47  | 0.41   | 1.64  | 0.34  | -0.62 | -0.49 | 0.38  | 1.53  | 2.39  | -0.73 |
| KLK2       | 4332   | NM_002432   | 11349 | -0.40 | 0.56  | 0.85  | 1.00   | 1.06  | 0.60  | -0.65 | -0.36 | 0.29  | 1.00  | 2.66  | -0.73 |
| LOC34405   | 3817   | NM_005551   | 11350 | 0.19  | 0.83  | -0.30 | 0.74   | 3.02  | 1.66  | -0.26 | 0.00  | -0.46 | 0.72  | 5.42  | -0.73 |
| LOC34405   | 34405  | NM_209304   | 11351 | 0.11  | 0.95  | 0.35  | 1.65   | 1.04  | 1.52  | -0.77 | 0.70  | -0.66 | 1.41  | 4.20  | -0.73 |
| TRMT3      | 55897  | NM_00100871 | 11352 | 0.05  | -0.61 | -0.08 | -0.19  | -0.17 | -0.40 | 0.12  | -0.66 | -0.18 | -0.64 | -0.76 | -0.73 |
| SMT1       | 23411  | NM_012238   | 11353 | 0.04  | -0.60 | 0.28  | 0.44   | -0.09 | 0.29  | 0.03  | -0.55 | -0.20 | -0.28 | 0.64  | -0.73 |
| SNR3       | 64898  | NM_152837   | 11354 | 0.16  | 0.19  | 0.05  | 0.13   | 0.96  | 0.60  | 0.11  | -0.45 | -0.40 | 0.40  | 1.70  | -0.73 |
| CHAF1B     | 8208   | NM_005441   | 11355 | -1.11 | -0.57 | -0.37 | -1.56  | -0.01 | 0.08  | -0.46 | -0.20 | -0.07 | -2.06 | -1.49 | -0.73 |
| TMCA       | 147798 | NM_144686   | 11356 | -0.92 | 0.01  | -0.60 | -1.23  | -0.26 | -0.86 | -0.36 | -0.05 | -0.32 | -1.51 | -2.35 | -0.73 |
| MBRAP1     | 9256   | NM_004758   | 11357 | 0.52  | 0.71  | -0.51 | 0.71   | 0.63  | 0.62  | -0.15 | 0.15  | -0.71 | 0.72  | 1.96  | -0.73 |
| FRD28      | 23219  | NM_015176   | 11358 | -0.89 | 0.54  | 0.00  | 0.04   | 0.29  | -0.42 | 0.87  | 0.25  | -0.11 | -0.35 | 0.11  | -0.73 |
| GNB1       | 2782   | NM_002074   | 11359 | 0.03  | -0.10 | -0.50 | -0.28  | 0.83  | -0.43 | 0.01  | -0.42 | -0.32 | -0.57 | 0.12  | -0.73 |
| MD1        | 4281   | NM_033290   | 11360 | -0.40 | -0.19 | -0.92 | -0.40  | -0.84 | -0.03 | -0.19 | 0.20  | -0.74 | -1.51 | -1.27 | -0.73 |
| LOC101919  | 15220  | NM_0409555  | 11361 | 0.75  | 0.39  | 0.02  | 1.12   | 1.14  | 1.07  | 0.52  | 0.12  | 0.24  | 0.39  | 1.67  | -0.73 |
| WFD06      | 140870 | NM_080827   | 11362 | -0.49 | 0.71  | -0.59 | -0.20  | -0.61 | -0.38 | -0.68 | -0.46 | -0.52 | -0.38 | -1.19 | -0.73 |
| YWHAG      | 7532   | NM_012479   | 11363 | 0.42  | 0.06  | 0.19  | 1.35   | 0.62  | 0.87  | -0.16 | -0.39 | -0.19 | 0.67  | 2.84  | -0.73 |
| SNRPB197   | 5275   | NM_003875   | 11364 | -0.35 | 0.25  | 0.29  | 0.41   | 0.01  | 0.31  | -0.35 | -0.11 | -0.41 | 0.30  | 4.83  | -0.73 |
| CLIOPE22   | 81566  | NM_030809   | 11365 | 0.01  | 0.06  | 0.42  | 0.60   | 0.09  | 0.66  | -0.56 | -0.17 | 0.00  | 0.49  | 1.35  | -0.73 |
| GNPDA1     | 10007  | NM_005471   | 11366 | -1.19 | -1.83 | -1.17 | -1.93  | -2.61 | -1.37 | -0.35 | -0.45 | 0.06  | -4.19 | -5.90 | -0.74 |
| FLJ2129    | 79819  | NM_207014   | 11367 | 0.15  | 0.13  | 0.36  | 0.78   | 0.33  | 1.60  | -0.32 | -0.03 | -0.39 | 0.64  | 2.71  | -0.74 |
| LOC1000018 | 27     | NM_0000018  | 11368 | -0.28 | 0.56  | 0.21  | 0.24   | -0.66 | -0.52 | 0.45  | 0.45  | 0.49  | 0.11  | 0.74  | -0.74 |
| IGSF2      | 9398   | NM_004258   | 11369 | -0.40 | -0.07 | 0.32  | 0.47   | 0.71  | 0.69  | -0.54 | -0.35 | 0.15  | -0.15 | 1.87  | -0.74 |
| RPL7L1     | 28585  | NM_139846   | 11370 | 0.23  | 0.47  | 0.31  | 0.73   | 1.76  | 0.53  | -0.30 | -0.32 | -0.12 | 1.01  | 3.01  | -0.74 |
| TYCOT      | 5765   | NM_010051   | 11371 | 0.18  | 0.79  | 0.03  | 0.67   | 0.03  | 0.61  | 0.03  | -0.01 | 0.61  | 0.59  | 0.51  | -0.74 |
| MGC33864   | 151188 | NM_152522   | 11372 | 0.22  | -0.39 | 0.14  | 0.17   | 0.11  | 0.00  | -0.16 | -0.40 | -0.18 | -0.03 | 0.28  | -0.74 |
| PRO1853    | 55471  | NM_00108394 | 11373 | 0.36  | -0.52 | -0.30 | -0.25  | -0.42 | -0.18 | -0.05 | -0.41 | -0.27 | -0.46 | -0.85 | -0.74 |
| LOC1000018 | 1047   | NM_0000018  | 11374 | 0.10  | -0.40 | 0.03  | -0.37  | -0.40 | -0.03 | -0.15 | -0.20 | -0.43 | 0.32  | 0.92  | -0.74 |
| MPO        | 4353   | NM_000250   | 11375 | 1.02  | 0.81  | 0.57  | -1.06  | -0.73 | 0.03  | -0.70 | -0.15 | 0.12  | -1.27 | -1.77 | -0.74 |
| KLHL7      | 55975  | NM_01031710 | 11376 | 0.81  | 0.42  | 0.63  | 2.37   | 1.34  | 2.04  | -0.61 | 0.08  | -0.21 | 1.86  | 5.75  | -0.74 |
| FLJ38819   | 27629  | NM_145865   | 11377 | 0.10  | 0.16  | 0.07  | -0.04  | 0.08  | 0.89  | -0.11 | -0.20 | -0.43 | 0.32  | 0.92  | -0.74 |
| SNARKC15   | 659    | NM_139035   | 11378 | 1.61  | 1.24  | 0.41  | 1.72   | 0.68  | 0.71  | 0.46  | -0.17 | 0.58  | 0.96  | 1.03  | -0.74 |
| TAS2R3     | 50831  | NM_016943   | 11379 | -0.41 | -0.08 | 0.39  | 0.04   | 0.86  | 0.19  | -0.56 | -0.33 | 0.15  | -0.10 | 1.09  | -0.74 |
| YHFP5      | 81555  | NM_030799   | 11380 | -1.23 | -0.48 | 0.40  | -1.44  | -0.24 | -0.16 | -0.30 | -0.43 | -0.01 | -1.32 | -1.84 | -0.74 |
| LOC1000018 | 55207  | NM_0000018  | 11381 | 0.01  | 0.25  | 0.22  | 0.38   | 0.22  | 0.32  | 0.12  | 0.25  | 0.12  | 0.56  | 0.73  | -0.74 |
| BAI2       | 576    | NM_001703   | 11382 | 0.09  | -0.75 | 0.37  | 0.37   | 0.23  | 0.82  | -0.09 | -0.41 | -0.24 | -0.29 | 1.41  | -0.74 |
| GBAS       | 2631   | NM_001483   | 11383 | -0.68 | 0.17  | -0.82 | -0.30  | 0.05  | -0.14 | -0.60 | 0.65  | -0.79 | -1.33 | -0.39 | -0.74 |
| LOC1000018 | 1493   | NM_0000018  | 11384 | -0.26 | 0.02  | 0.26  | -0.10  | -0.05 | -0.20 | -0.55 | -0.20 | 0.00  | 0.01  | 1.26  | -0.74 |
| LOC1000018 | 23406  | NM_021149   | 11385 | 0.21  | -0.06 | -0.89 | -0.43  | -0.65 | -0.33 | 0.43  | 0.25  | -0.56 | -0.74 | -1.43 | -0.74 |
| FRD03      | 80206  | NM_025135   | 11386 | 0.11  | -0.31 | -0.33 | -0.24  | -0.04 | 0.28  | -0.27 | 0.01  | -0.48 | 0.09  | 0.00  | -0.74 |
| NFY2Z      | 4887   | NM_000910   | 11387 | -0.23 | -0.98 | -0.88 | 0.29   | 0.59  | 1.39  | 0.97  | -0.82 | -0.90 | -2.09 | 2.25  | -0.74 |
| URB1       | 9875   | NM_014825   | 11388 | 0.47  | 0.31  | 0.19  | 0.68   | 0.04  | 0.59  | -0.14 | 0.69  | 0.17  | 0.49  | 1.17  | -0.74 |
| MCM3       | 6658   | NM_005634   | 11389 | -0.24 | 1.28  | -0.29 | 0.11   | 0.17  | 0.58  | -0.19 | 0.08  | -0.63 | 1.22  | 0.86  | -0.74 |
| SOX5       | 4174   | NM_006739   | 11390 | -0.15 | -0.94 | -0.80 | -0.43  | -0.57 | -0.35 | 0.69  | -0.82 | -0.62 | -1.89 | -1.35 | -0.74 |
| LOC1000018 | 41     | NM_0000018  | 11391 | 0.08  | 0.28  | 0.34  | 0.27   | 0.48  | 0.29  | -0.17 | -0.48 | 0.74  | -0.70 | 0.74  | -0.74 |
| PCDH19     | 57526  | NM_020766   | 11392 | 0.35  | -0.48 | -0.06 | -0.29  | 0.63  | 0.81  | 0.21  | -0.57 | -0.39 | -0.18 | 1.14  | -0.74 |
| GGN        | 199720 | NM_152657   | 11393 | -0.64 | -0.95 | -0.61 | 0.39   | -0.31 | -0.32 | -0.10 | -0.71 | 0.06  | -2.21 | -0.44 | -0.75 |
| LOC1000018 | 56568  | NM_001972   | 11394 | -0.52 | -0.28 | 0.47  | 0.32   | -0.43 | -0.19 | -0.47 | -0.29 | 0.06  | -0.22 | 0.11  | -0.75 |
| FLJ4524    | 401562 | NM_207510   | 11395 | 0.03  | 0.29  | 0.09  | 0.96   | 0.71  | 1.22  | 0.33  | -0.41 | -0.01 | 0.23  | 2.88  | -0.75 |
| ATN2L      | 11273  | NM_017492   | 11396 | -0.58 | -0.87 | -0.67 | 0.00   | 0.74  | -0.46 | -0.46 | -0.74 | 0.44  | -2.12 | 0.27  | -0.75 |
| SMG2       | 6407   | NM_003008   | 11397 | -0.20 | -0.55 | 0.33  | -0.10  | 0.01  | 0.31  | -0.02 | -0.79 | 0.06  | -0.42 | 0.21  | -0.75 |
| MGC13379   | 5129   | NM_010499   | 11398 | 0.23  | 0.82  | 0.26  | 0.81   | 0.36  | 0.51  | 0.36  | 0.01  | 0.86  | 0.65  | 0.85  | -0.75 |
| DMPA1      | 55929  | NM_00104024 | 11399 | 0.57  | 0.10  | 0.06  | 1.87   | 1.51  | 1.89  | 0.10  | -0.36 | -0.49 | 0.73  | 5.27  | -0.75 |
| HAFY       | 9555   | NM_138609   | 11400 | -0.35 | -0.41 | -0.89 | -0.68  | -0.61 | -0.67 | -0.11 | -0.28 | -0.36 | -1.65 | -1.97 | -0.75 |
| LOC1000018 | 1061   | NM_0000018  | 11401 | 0.52  | 0.20  | 0.30  | 0.12   | 0.14  | 0.12  | 0.52  | 0.19  | 0.82  | 0.81  | 0.46  | -0.75 |
| C20ORF114  | 92747  | NM_033197   | 11402 | -0.52 | -0.44 | -0.86 | -0.52  | -0.39 | -0.70 | -0.65 | -0.42 | 0.31  | -1.01 | -1.60 | -0.75 |
| OR4N2      | 390429 | NM_00104723 | 11403 | -1.01 | -0.75 | -1.15 | -1.12  | -0.98 | -0.60 | -0.76 | -0.34 | 0.35  | -1.91 | -2.71 | -0.75 |
| PHOX2B     | 585    | NM_0000018  | 11404 | 0.01  | 0.29  | 0.08  | 0.14   | 0.09  | 0.20  | 0.14  | 0.09  | 0.20  | 0.22  | 0.65  | -0.75 |
| C10ORF25   | 25966  | NM_199550   | 11405 | 0.58  | 0.48  | 0.01  | 0.74   | 1.02  | 0.20  | 0.21  | -0.57 | -0.39 | 1.07  | 1.96  | -0.75 |
| PKA4       | 10298  | NM_00104834 | 11406 | 2.13  | 0.87  | 0.24  | 1.48   | 2.25  | 1.74  | 0.26  | -0.44 | -0.57 | 3.24  | 5.47  | -0.75 |
| FRS2       | 9570   | NM_054022   | 11407 | 0.57  | 0.20  | 0.33  | 2.74   | 2.91  | 0.52  | -0.56 | -0.82 | 0.61  | 0.90  | 6.17  | -0.75 |
| LOC1000018 | 37426  | NM_006382   | 11408 | -0.23 | -0.59 | -0.89 | -0.14  | -0.25 | -0.37 | -0.42 | -0.37 | -0.15 | -1.71 | -1.08 | -0.75 |
| HBP1       | 3281   | NM_001537   | 11409 | -1.13 | -1.16 | -0.72 | -1.39  | -1.49 | -0.97 | -0.39 | -1.18 | -0.18 | -3.02 | -3.84 | -0.75 |
| SC3SF4     | 341880 | NM_00180455 | 11410 | -0.11 | -0.91 | 0.30  | 0.47   | 0.11  | 0.26  | -0.34 | -0.50 | 0.08  | -0.72 | 0.83  | -0.75 |
| FLJ4466    | 84918  | NM_033212   | 11411 | -0.37 | -0.10 | -0.60 | -0.10  | -0.60 | -0.10 | -0.60 | -0.10 | -0.60 | -0.10 | -0.60 | -0.75 |
| FLJ4466    | 84916  | NM_032790   | 11412 | -0.37 | -0.05 | 0.29  | 0.71</ |       |       |       |       |       |       |       |       |

|           |        |              |       |       |       |       |       |       |       |       |       |       |       |       |       |
|-----------|--------|--------------|-------|-------|-------|-------|-------|-------|-------|-------|-------|-------|-------|-------|-------|
| HPBP2     | 58155  | NM_021190    | 11495 | 1.11  | -0.09 | 2.67  | 1.98  | 2.65  | 3.13  | 0.04  | -0.75 | -0.08 | 3.69  | 7.76  | -0.78 |
| IM25A     | 9224   | NM_001862    | 11496 | 0.67  | -0.24 | -0.15 | 0.94  | 1.59  | 1.11  | -0.17 | -0.15 | -0.67 | 0.28  | 1.67  | -0.78 |
| MRP46     | 26589  | NM_022163    | 11497 | 1.22  | 1.07  | -0.95 | -1.72 | -0.90 | -0.91 | 0.45  | -0.53 | 0.20  | -3.23 | -3.53 | -0.78 |
| CSF2      | 1437   | NM_000758    | 11498 | -0.95 | -0.96 | -0.67 | -1.26 | -0.85 | -1.04 | -0.58 | -0.48 | 0.28  | -2.59 | -3.14 | -0.78 |
| SHH       | 6489   | NM_000193    | 11499 | -0.21 | -0.39 | 2.36  | 1.89  | 0.80  | 2.83  | -0.95 | -0.60 | 0.77  | 1.76  | 5.52  | -0.78 |
| 2318      | 2318   | NM_0123      | 11500 | 0.23  | 0.50  | -0.12 | 0.03  | 0.02  | 0.02  | -0.40 | -0.09 | -0.02 | 0.39  | 0.14  | -0.78 |
| KIAA1305  | 57523  | NM_040150    | 11501 | -0.87 | -0.70 | -0.11 | -1.91 | -1.35 | -1.50 | -0.45 | -0.26 | -0.07 | -2.51 | -4.76 | -0.78 |
| AT2C21    | 27032  | NM_001001485 | 11502 | 0.73  | -0.23 | -1.07 | 1.06  | 0.69  | 1.48  | 0.16  | 0.07  | -1.01 | -2.02 | 3.23  | -0.78 |
| PHNBP     | 9796   | NM_015029    | 11503 | 0.56  | 0.16  | 0.39  | 0.71  | 0.14  | 0.71  | 0.14  | 0.71  | 0.14  | 0.09  | 1.58  | -0.78 |
| LMNR11    | 55716  | NM_018113    | 11504 | -0.45 | -0.30 | -0.84 | -0.17 | 0.00  | -0.49 | 0.11  | -0.44 | -0.46 | -0.69 | -0.65 | -0.78 |
| CHRNA1    | 11314  | NM_000079    | 11505 | 0.51  | -0.46 | -0.79 | -0.07 | -0.04 | -0.22 | -0.10 | -0.27 | -0.41 | -1.75 | -0.33 | -0.78 |
| MRBG      | 5717   | NM_000807    | 11506 | 0.08  | 0.10  | -0.20 | 0.00  | 0.00  | 0.00  | 0.00  | 0.00  | 0.00  | -0.01 | 1.95  | -0.78 |
| CFM       | 1366   | NM_001005002 | 11507 | -0.45 | 0.36  | 0.18  | 0.81  | -0.21 | 0.10  | 0.44  | -0.04 | -0.30 | 0.99  | 0.70  | -0.78 |
| C14ORF135 | 64430  | NM_022495    | 11508 | -0.12 | 0.52  | 0.48  | 0.96  | 1.08  | 0.59  | -0.71 | -0.11 | 0.04  | 0.88  | 2.62  | -0.78 |
| POLS      | 11044  | NM_006999    | 11509 | 0.26  | 0.02  | -0.18 | 0.09  | 0.11  | 0.00  | -0.03 | -0.29 | -0.47 | 0.10  | 0.20  | -0.78 |
| FLKZ7     | 7981   | NM_005094    | 11510 | 0.25  | -0.19 | 0.27  | 0.97  | 0.79  | 0.60  | -0.22 | -0.29 | -0.27 | 0.32  | 2.37  | -0.78 |
| NCOA2     | 10499  | NM_006540    | 11511 | -0.16 | -0.33 | -0.90 | -0.18 | -0.19 | -0.23 | -0.22 | 0.11  | -0.67 | -1.38 | -0.61 | -0.79 |
| FNDC5     | 25295  | NM_153756    | 11512 | -0.42 | -0.89 | -0.43 | -0.61 | -0.47 | -0.57 | -0.06 | 0.51  | -0.21 | -1.74 | -1.65 | -0.79 |
| FLKXG1    | 57480  | NM_001020884 | 11513 | -0.79 | 0.18  | 0.38  | 1.15  | 0.51  | 0.10  | -1.03 | 0.22  | 0.03  | -0.23 | 1.76  | -0.79 |
| CLU11     | 574028 | NM_010125233 | 11514 | 0.13  | 0.64  | 0.71  | 0.42  | 0.06  | 0.33  | -0.40 | -0.18 | -0.20 | 1.48  | 0.80  | -0.79 |
| ELI2      | 22836  | NM_012081    | 11515 | 0.61  | -0.25 | -0.29 | 0.43  | 2.06  | 0.68  | 0.68  | -0.83 | -0.63 | 0.07  | 3.17  | -0.79 |
| DR151     | 4892   | NM_012160    | 11516 | -0.23 | -0.87 | -1.18 | -0.48 | -0.36 | -0.95 | 0.44  | -0.56 | -0.66 | -0.69 | -1.79 | -0.79 |
| A2        | 84224  | NM_032264    | 11517 | 0.86  | 0.19  | -0.79 | 0.66  | -0.18 | -0.29 | -0.59 | -0.46 | -0.66 | 1.48  | 0.19  | -0.79 |
| PCAF      | 8850   | NM_003884    | 11518 | -0.57 | -0.20 | -0.13 | -0.25 | 0.16  | -0.50 | -0.58 | -0.21 | 0.00  | -0.90 | -0.60 | -0.79 |
| STDBP     | 25298  | NM_178509    | 11519 | -0.40 | 0.20  | -0.09 | 0.05  | 0.46  | -0.09 | -0.38 | -0.31 | -0.09 | -0.29 | 0.42  | -0.79 |
| KIAA1914  | 84632  | NM_022500    | 11520 | -0.09 | -0.23 | -0.33 | 0.38  | 0.03  | 0.84  | 0.02  | -0.21 | 0.60  | 0.69  | 1.26  | -0.79 |
| FLJ1196   | 146802 | NM_001099646 | 11521 | 0.09  | -0.03 | -0.48 | 1.01  | 0.81  | 0.07  | -0.58 | 0.14  | -0.07 | -0.43 | 1.89  | -0.79 |
| ODZ2      | 57451  | NM_001122679 | 11522 | -1.18 | -0.27 | -0.46 | -1.10 | 0.07  | 0.00  | -0.27 | -0.03 | -0.49 | -0.90 | -0.03 | -0.79 |
| FLJ20507  | 55654  | NM_012160    | 11523 | 0.74  | -1.13 | -0.59 | -1.24 | -1.13 | -0.07 | -0.59 | -0.17 | -0.59 | -0.19 | 1.36  | -0.79 |
| LOC146845 | 146445 | NM_001037306 | 11524 | -0.72 | -0.32 | 0.02  | 1.07  | 1.87  | 1.62  | -0.84 | -0.28 | 0.33  | -1.02 | 4.56  | -0.79 |
| PI3L      | 143458 | NM_174902    | 11527 | -0.23 | 0.14  | -0.81 | -0.53 | 0.38  | 0.09  | -0.08 | -0.15 | -0.56 | -0.90 | -0.06 | -0.79 |
| LOC143458 | 143458 | NM_174902    | 11527 | -0.23 | 0.14  | -0.81 | -0.53 | 0.38  | 0.09  | -0.08 | -0.15 | -0.56 | -0.90 | -0.06 | -0.79 |
| MFNG      | 4242   | NM_002405    | 11528 | -0.78 | -0.30 | -0.80 | -1.12 | -0.52 | -1.16 | -0.90 | 0.08  | 0.03  | -1.88 | -1.81 | -0.79 |
| RBD04     | 54538  | NM_019055    | 11529 | 0.23  | 0.35  | -0.40 | 0.96  | 0.00  | 0.21  | -0.21 | -0.14 | -0.44 | 0.18  | 1.18  | -0.79 |
| CT17.4    | 72889  | NM_001000139 | 11530 | -1.06 | 0.54  | -0.91 | -0.41 | -0.20 | -0.92 | -0.46 | -0.13 | -0.82 | -0.54 | 1.13  | -0.79 |
| SLC30A3   | 7781   | NM_003459    | 11531 | 0.81  | 0.29  | -0.33 | 0.33  | 0.90  | 0.74  | 0.21  | -0.26 | -0.74 | 0.77  | 1.96  | -0.79 |
| MRTF-B    | 57496  | NM_014048    | 11532 | 0.97  | 1.11  | -0.18 | 0.63  | 1.43  | 0.12  | -0.17 | -0.33 | -0.30 | 1.90  | 2.19  | -0.79 |
| TRITC2    | 2389   | NM_015023    | 11533 | 0.24  | 0.12  | -0.32 | 0.52  | 0.26  | 0.26  | 0.52  | 0.26  | 0.26  | 0.52  | 0.26  | -0.79 |
| FLJ3420   | 80131  | NM_025061    | 11534 | 0.21  | 0.10  | 0.01  | 0.58  | -0.36 | 0.53  | -0.13 | -0.07 | -0.59 | 0.32  | 0.75  | -0.79 |
| URL4      | 8266   | NM_014235    | 11535 | -0.40 | -0.59 | -0.58 | -0.68 | 0.21  | -0.43 | 0.12  | -0.62 | -0.30 | -1.58 | -0.89 | -0.79 |
| SRH11     | 2653   | NM_001837    | 11536 | -0.46 | -0.05 | 0.78  | -0.54 | -0.46 | -0.37 | -0.18 | -0.18 | -0.28 | 0.28  | 1.59  | -0.79 |
| FBNQ46    | 23403  | NM_173179    | 11537 | 0.06  | 0.08  | 0.62  | 0.42  | 0.49  | 0.26  | -0.32 | -0.51 | 0.04  | 0.60  | 1.18  | -0.80 |
| PRKAGC    | 5568   | NM_002732    | 11538 | -0.21 | -0.76 | -0.76 | -0.48 | -0.58 | -0.26 | -0.05 | -0.32 | -0.42 | -1.72 | -1.31 | -0.80 |
| FLJ20296  | 54894  | NM_017570    | 11539 | -0.67 | -0.32 | -0.69 | 0.70  | -0.04 | -0.27 | -0.38 | 0.01  | -0.42 | -0.33 | 0.93  | -0.80 |
| MRG4      | 5565   | NM_007320    | 11540 | 0.36  | 0.78  | 0.32  | 0.78  | 0.32  | 0.78  | 0.32  | 0.78  | 0.32  | 0.78  | 0.32  | -0.80 |
| ADCYAP1R1 | 117    | NM_001118    | 11541 | -1.03 | 0.10  | -0.91 | -0.34 | -0.49 | -0.10 | -0.58 | -0.30 | -0.52 | -1.84 | -0.93 | -0.80 |
| MIR6942   | 117594 | NM_054030    | 11542 | -0.45 | -0.44 | 0.95  | 0.75  | 0.84  | -0.04 | -0.67 | -0.70 | 0.58  | 0.06  | 1.55  | -0.80 |
| ANGEL1D   | 4169   | NM_014048    | 11543 | -0.51 | -0.58 | -0.74 | -0.60 | -0.58 | -0.74 | -0.60 | -0.58 | -0.74 | -0.60 | -0.58 | -0.80 |
| CYR1      | 116159 | NM_025294    | 11544 | -0.61 | -0.36 | -0.14 | -0.82 | -0.61 | -0.26 | -0.40 | -0.14 | -0.26 | -1.11 | -1.69 | -0.80 |
| RAB34     | 83871  | NM_013934    | 11545 | -0.93 | -0.60 | 0.09  | -0.97 | -0.85 | -1.10 | -0.73 | -0.42 | 0.36  | -1.44 | -2.92 | -0.80 |
| SMT5      | 23489  | NM_001241    | 11546 | -1.11 | -1.02 | -0.60 | -1.49 | -1.02 | -0.60 | -1.49 | -1.02 | -0.60 | -2.24 | -2.26 | -0.80 |
| RGRMTD3   | 158234 | NM_144964    | 11547 | -0.90 | 1.06  | -0.19 | -0.94 | -0.91 | -0.24 | -0.52 | -0.70 | 0.42  | -2.14 | -0.99 | -0.80 |
| SLC10A1   | 6554   | NM_003049    | 11548 | 0.50  | -0.23 | -0.46 | 0.29  | 0.19  | -0.51 | -0.01 | -0.56 | -0.23 | -0.19 | -0.04 | -0.80 |
| PPP1R1B   | 84552  | NM_181305    | 11549 | 0.39  | -0.93 | -0.17 | 0.82  | 0.21  | 0.34  | 0.00  | -0.73 | -0.07 | 0.71  | 1.37  | -0.80 |
| MGC302945 | 28433  | NM_190295    | 11550 | 0.22  | 0.22  | 0.29  | 0.27  | 0.33  | 0.27  | 0.33  | 0.27  | 0.33  | 0.27  | 0.33  | -0.80 |
| ORX1      | 390113 | NM_001004276 | 11551 | 0.87  | 0.49  | 1.15  | 0.91  | 0.56  | 1.22  | -0.20 | -0.28 | -0.32 | 2.50  | 2.69  | -0.80 |
| LPE       | 3991   | NM_005157    | 11552 | -1.17 | -0.45 | 0.54  | -0.33 | 0.20  | 0.00  | 0.00  | -0.61 | -0.20 | -0.08 | -1.13 | -0.80 |
| ILR       | 81     | NM_004343    | 11553 | 0.01  | -0.11 | -0.80 | -0.01 | -0.11 | -0.80 | -0.01 | -0.11 | -0.80 | -0.01 | -0.11 | -0.80 |
| AMPGA2    | 83478  | NM_01025616  | 11554 | -0.29 | 0.71  | -1.03 | -0.50 | -1.01 | -0.59 | -0.03 | -0.31 | -0.46 | -0.03 | -2.10 | -0.80 |
| PHC1      | 1911   | NM_004426    | 11555 | 0.16  | 1.17  | 0.53  | 2.20  | 2.15  | 1.57  | -0.71 | -0.02 | -0.07 | 1.86  | 5.92  | -0.80 |
| PHC21     | 2649   | NM_015613    | 11556 | 0.05  | -0.36 | -0.11 | -0.49 | -0.38 | -0.69 | -0.11 | -0.49 | -0.38 | -0.42 | -4.58 | -0.80 |
| CAP2      | 10496  | NM_006366    | 11557 | 0.34  | 0.50  | 0.34  | 0.59  | 1.28  | 1.02  | -0.30 | -0.27 | -0.24 | 0.50  | 2.88  | -0.80 |
| RGS10     | 6001   | NM_002925    | 11558 | -0.72 | -0.46 | -0.86 | -0.38 | -0.68 | -0.55 | -0.48 | -0.19 | -0.13 | -2.04 | -1.60 | -0.80 |
| OR1072    | 12850  | NM_00106475  | 11559 | -0.35 | -0.93 | -0.85 | -0.53 | -0.49 | -0.42 | -0.36 | -0.70 | 0.26  | -1.93 | -1.44 | -0.80 |
| HPE       | 1065   | NM_006665    | 11560 | -0.39 | 0.53  | 0.82  | 0.52  | 0.28  | 0.52  | 0.28  | 0.52  | 0.28  | 0.52  | 0.28  | -0.80 |
| PCDHGA7   | 56108  | NM_032087    | 11561 | -0.41 | 0.12  | -0.35 | 0.33  | 0.76  | 0.47  | -0.62 | -0.20 | 0.02  | -0.64 | 1.55  | -0.80 |
| PH1       | 56704  | NM_020047    | 11562 | -0.87 | -0.76 | -0.75 | -0.92 | -0.24 | 0.28  | -0.27 | -0.50 | -0.03 | -2.38 | -0.41 | -0.80 |
| MGC302950 | 34056  | NM_001004208 | 11563 | 0.01  | 0.55  | 0.15  | 0.06  | 0.18  | 0.16  | 0.06  | 0.18  | 0.16  | 0.06  | 0.18  | -0.80 |
| MAP3K11   | 4296   | NM_002419    | 11564 | -0.83 | -0.50 | -0.91 | -0.53 | -0.53 | -0.27 | -1.11 | -1.11 | -0.59 | -2.24 | -1.34 | -0.80 |
| FLJ3308   | 145748 | NM_152449    | 11565 | -0.77 | 0.14  | 0.55  | -0.31 | 0.49  | 0.10  | -0.47 | -0.37 | 0.04  | -0.07 | 0.28  | -0.80 |
| BACS      | 959    | NM_001015480 | 11566 | -0.12 | -0.28 | -0.17 | -0.28 | -0.17 | -0.28 | -0.17 | -0.28 | -0.17 | -0.28 | -0.17 | -0.80 |
| MGC12966  | 84792  | NM_001017163 | 11567 | -0.20 | -0.29 | 0.46  | -0.10 | 0.43  | 0.08  | -0.33 | -0.70 | 0.23  | 0.03  | 0.26  | -0.81 |
| GPATC1    | 5594   | NM_018025    | 11568 | -0.44 | -0.06 | -0.95 | 0.05  | -0.38 | -0.22 | -0.55 | -0.45 | -0.71 | -1.45 | -0.55 | -0.81 |
| MGC45873  | 148498 | NM_152486    | 11569 | 0.52  | 0.40  | 0.00  | 0.39  | 0.48  | 1.21  | -0.03 | -0.26 | -0.51 | 0.82  | 2.08  | -0.81 |
| ZNF513    | 13057  | NM_144613    | 11570 | 0.75  | 1.16  | 1.15  | 0.61  | 0.60  | 0.61  | 0.60  | 0.61  | 0.60  | 0.61  | 0.60  | -0.81 |
| FLJ39458  | 401474 | NM_207306    | 11571 | -0.40 | -0.31 | 0.62  | 0.14  | 0.61  | 0.00  | -0.54 | -0.47 | 0.21  | -1.00 | 0.75  | -0.81 |
| PMS       | 23420  | NM_014287    | 11572 | 1.43  | 0.14  | 1.64  | 2.24  | 2.59  | 3.16  | -0.46 | 0.26  | -0.61 | 6.20  | 8.00  | -0.81 |
| FLJ13276  | 6418   | NM_014884    | 11573 | 0.11  | 0.19  | 0.16  | 0.11  | 0.16  | 0.11  | 0.16  | 0.11  | 0.16  | 0.11  | 0.16  | -0.81 |
| ERC3      | 2071   | NM_000122    | 11574 | -0.52 | -0.60 | 0.50  | 0.31  | 1.30  | -0.09 | -0.50 | -0.97 | 0.66  | -0.62 | 1.51  | -0.81 |
| SLC25A31  | 83447  | NM_031291    | 11575 | 0.71  | 0.46  | 0.10  | 0.15  | -0.13 |       |       |       |       |       |       |       |



|             |        |              |       |       |       |       |       |        |       |       |       |       |       |       |       |
|-------------|--------|--------------|-------|-------|-------|-------|-------|--------|-------|-------|-------|-------|-------|-------|-------|
| CYP7B1      | 9420   | NM_004820    | 11657 | 0.25  | -0.29 | 1.59  | 2.56  | 0.76   | 1.02  | -0.65 | -0.28 | 0.10  | 1.55  | 4.34  | -0.84 |
| HE4         | 5780   | NM_021370    | 11658 | -1.45 | -1.65 | -1.62 | -1.24 | -0.48  | -0.28 | -0.49 | -0.88 | -0.20 | -0.91 | -2.44 | -0.84 |
| DAST1       | 113189 | NM_130468    | 11659 | 1.20  | 0.97  | 0.12  | -1.14 | -1.32  | -0.12 | -0.93 | -0.24 | 0.34  | -2.05 | 2.57  | -0.84 |
| OST         | 5020   | NM_000915    | 11660 | -0.64 | -0.50 | -0.75 | -0.31 | 0.22   | 0.01  | -0.27 | -0.03 | -0.53 | -1.88 | -0.08 | -0.84 |
| CEL         | 1056   | NM_001307    | 11661 | -0.23 | -0.95 | -0.85 | 0.60  | 0.20   | 0.42  | 0.13  | -0.41 | -0.56 | -2.03 | 1.23  | -0.84 |
| LOC10073    | 20013  | NM_132665    | 11662 | 0.13  | 0.23  | 0.11  | 0.62  | 0.02   | 0.02  | 0.02  | -0.68 | 0.42  | 0.02  | 0.83  | -0.84 |
| UBT1D1      | 80019  | NM_024954    | 11663 | -0.36 | -0.73 | -0.15 | -0.05 | -0.48  | -0.39 | -0.48 | -0.41 | 0.05  | -1.24 | -0.91 | -0.84 |
| SURF6       | 6838   | NM_006753    | 11664 | -0.50 | -0.16 | -0.39 | -0.68 | -0.69  | 0.08  | -0.25 | 0.02  | -0.61 | -1.05 | -1.30 | -0.84 |
| SNRPB       | 26180  | NM_016650    | 11665 | -0.41 | 0.60  | 0.57  | 0.41  | 0.60   | 0.40  | -0.06 | -0.41 | 0.60  | 0.52  | 1.55  | -0.84 |
| FGLA        | 344018 | NM_01004311  | 11666 | -0.30 | 0.06  | 0.73  | 1.13  | 1.26   | 1.52  | -0.55 | 0.10  | -0.39 | 0.49  | 3.90  | -0.84 |
| OR13C5      | 138799 | NM_01004482  | 11667 | -0.44 | 0.29  | 0.50  | 0.68  | -0.04  | 0.90  | -0.90 | 0.06  | 0.00  | 0.34  | 1.54  | -0.84 |
| TFRP8       | 2777   | NM_001681    | 11668 | -0.35 | -0.85 | -0.43 | -0.15 | -0.15  | -0.15 | -0.15 | -0.15 | -0.15 | -0.15 | -0.15 | -0.84 |
| SELM        | 340006 | NM_080430    | 11669 | 0.45  | 0.46  | -0.86 | -0.63 | 0.17   | 0.81  | 0.33  | -0.57 | -0.60 | 1.17  | 0.34  | -0.84 |
| KYNU        | 8942   | NM_00103298  | 11670 | 0.15  | -0.13 | 0.69  | 1.09  | 0.16   | 0.73  | -0.47 | -0.37 | 0.00  | 0.71  | 1.99  | -0.84 |
| IC90RF18    | 147485 | NM_152474    | 11671 | -0.86 | 0.55  | -0.34 | 1.89  | 1.17   | 0.41  | -1.07 | -0.27 | -0.05 | -0.65 | 3.47  | -0.84 |
| DZK41       | 26528  | NM_018699    | 11672 | -0.30 | 0.07  | 0.11  | 1.82  | 2.40   | 1.79  | 0.84  | -0.51 | 0.51  | 1.95  | 6.00  | -0.84 |
| VP52        | 6293   | NM_002553    | 11673 | 0.31  | -0.05 | 0.78  | 0.55  | 0.94   | 0.53  | 0.19  | -0.68 | -0.35 | 1.04  | 2.02  | -0.84 |
| GNAS        | 160622 | NM_181711    | 11674 | -0.72 | -1.03 | -0.75 | 0.05  | -0.17  | -0.10 | 0.35  | -0.61 | -0.59 | -2.50 | -0.22 | -0.84 |
| ADH3        | 84956  | NM_002604    | 11675 | -0.21 | -0.15 | -1.06 | -0.54 | -0.88  | 0.03  | 0.03  | 0.02  | -0.89 | -1.42 | 1.40  | -0.84 |
| C20ORF30    | 29058  | NM_00100925  | 11676 | 0.85  | -0.76 | -0.83 | 0.07  | -0.85  | -1.14 | 0.22  | -0.35 | -0.71 | -0.73 | -0.92 | -0.84 |
| PDE6A       | 5145   | NM_000440    | 11677 | 0.10  | 0.25  | 0.12  | 0.40  | 0.67   | 0.22  | -0.43 | -0.35 | -0.07 | 0.47  | 1.30  | -0.84 |
| RITAP1B-3   | 337970 | NM_001009    | 11678 | 0.01  | -0.02 | 0.35  | 0.54  | 0.33   | 0.40  | -0.32 | -0.42 | -0.10 | 0.33  | 1.27  | -0.84 |
| SMR3        | 10879  | NM_006685    | 11679 | 0.46  | 0.60  | 0.04  | 1.33  | 1.84   | 2.31  | -0.32 | -0.02 | -0.50 | 1.10  | 5.50  | -0.84 |
| PRR2        | 51450  | NM_016307    | 11680 | 0.50  | 0.13  | 1.26  | 0.07  | 0.08   | 1.24  | -0.32 | -0.48 | -0.04 | 1.89  | 1.40  | -0.84 |
| LOC153222   | 153222 | NM_153607    | 11681 | -0.60 | -0.39 | 0.04  | 0.22  | -0.02  | 0.09  | -0.62 | -0.54 | 0.31  | -0.95 | 0.29  | -0.84 |
| PS2         | 6206   | NM_001016    | 11682 | 0.50  | -1.34 | 1.39  | -1.36 | 2.45   | -0.31 | 0.75  | -0.50 | 1.10  | -2.23 | -8.19 | -0.85 |
| LOC340554   | 340554 | NM_00101888  | 11683 | -0.09 | 0.10  | -0.07 | 0.48  | 0.18   | -0.02 | -0.49 | -0.31 | -0.04 | -0.07 | 0.64  | -0.85 |
| LOC52591    | 62591  | NM_942113    | 11684 | -0.57 | 1.00  | 0.47  | 1.33  | 1.35   | 0.76  | -0.32 | -0.20 | -0.33 | 2.04  | 3.45  | -0.85 |
| DNCL1       | 51145  | NM_016541    | 11685 | 0.04  | 0.13  | 0.07  | 0.12  | 0.05   | 0.66  | -0.15 | -0.02 | 0.02  | 0.10  | 0.20  | -0.85 |
| SZC214      | 144195 | NM_153449    | 11686 | 1.19  | 0.75  | 0.52  | 1.05  | 1.12   | 1.00  | -0.40 | -0.36 | -0.45 | 2.46  | 3.17  | -0.85 |
| WDR37       | 22884  | NM_014023    | 11687 | -0.21 | -0.89 | -0.91 | 0.23  | 0.90   | 0.09  | 0.54  | -0.96 | -0.43 | -2.01 | 1.22  | -0.85 |
| CHAB        | 860    | NM_016378    | 11688 | 0.86  | 1.58  | 0.17  | 1.58  | 0.89   | 0.31  | 0.68  | -0.26 | 0.21  | 2.11  | 2.89  | -0.85 |
| CHR3Y7      | 83850  | NM_031913    | 11689 | 0.82  | 0.30  | 0.67  | 0.07  | 1.33   | 1.56  | 0.01  | -0.36 | -0.48 | 1.79  | 3.95  | -0.85 |
| PN4         | 5303   | NM_006223    | 11690 | -0.67 | -0.18 | -0.42 | 0.10  | -0.20  | -0.39 | -0.64 | -0.03 | -0.18 | -1.27 | -0.48 | -0.85 |
| IP01        | 51194  | NM_016358    | 11691 | -0.67 | -0.80 | 0.61  | 1.17  | 0.73   | 0.42  | -0.69 | -0.65 | 0.50  | -0.86 | 4.42  | -0.85 |
| D2          | 51     | NM_001797    | 11692 | -0.63 | 0.13  | 1.10  | 0.52  | 0.59   | 0.65  | 0.47  | -0.07 | 0.69  | 0.87  | 3.94  | -0.85 |
| PAGM4       | 441531 | NM_00102891  | 11693 | -0.33 | -0.32 | -0.26 | 0.01  | -0.31  | -0.63 | -0.59 | -0.38 | 0.12  | -0.90 | -0.93 | -0.85 |
| DKS928E     | 9130   | NM_004699    | 11694 | 0.03  | -0.41 | 0.10  | 0.35  | -0.44  | 0.24  | -0.31 | -0.25 | -0.28 | -0.28 | 0.15  | -0.85 |
| MS14        | 40166  | NM_00100329  | 11695 | 0.04  | 0.00  | 0.00  | 0.00  | 0.00   | 0.00  | -0.42 | -0.05 | 0.07  | -0.62 | 0.69  | -0.85 |
| HMG1A1      | 3159   | NM_145903    | 11696 | -0.73 | -0.26 | 0.10  | 0.09  | -0.58  | -0.57 | -0.75 | -0.30 | 0.20  | -0.89 | -1.07 | -0.85 |
| GT212       | 2961   | NM_002095    | 11697 | 0.09  | -0.04 | -0.60 | -0.82 | -0.04  | 0.10  | 0.17  | -0.24 | -0.78 | -0.55 | -0.76 | -0.85 |
| IC2A15      | 1016   | NM_00100520  | 11698 | 0.00  | 0.14  | 0.20  | 0.15  | 1.02   | 0.17  | 0.55  | -0.02 | 0.51  | 0.33  | 1.73  | -0.85 |
| FGF21       | 26291  | NM_019113    | 11699 | 0.09  | 0.06  | 0.81  | 0.88  | 0.46   | 0.04  | 0.57  | -0.33 | 0.05  | 0.84  | 1.39  | -0.85 |
| FLJ2049     | 54805  | NM_015590    | 11700 | -0.67 | -0.77 | -0.98 | 0.17  | -0.34  | 0.47  | 0.03  | -0.10 | -0.78 | -2.42 | 0.30  | -0.85 |
| SR3         | 57316  | NM_020394    | 11701 | 0.13  | 0.21  | 0.27  | 0.15  | 0.46   | 0.77  | -0.16 | -0.36 | -0.32 | 0.63  | 1.37  | -0.85 |
| LOC130617   | 130617 | NM_004410    | 11702 | -0.44 | 0.40  | -0.63 | -0.47 | -0.26  | 0.17  | -0.46 | -0.17 | -0.47 | -0.47 | -0.12 | -0.85 |
| OTF         | 23440  | NM_032109    | 11703 | 0.96  | 0.03  | -0.06 | 0.39  | 0.81   | 0.61  | 0.13  | -0.52 | -0.47 | 0.92  | 1.82  | -0.85 |
| DKFZP648147 | 26071  | NM_001134321 | 11704 | -0.60 | -0.78 | -0.48 | 0.25  | 0.08   | -0.42 | -0.61 | -0.96 | 0.72  | -0.89 | -0.08 | -0.85 |
| TR12        | 1111   | NM_170560    | 11705 | 1.63  | 1.26  | 0.84  | 1.17  | 1.67   | 1.56  | -2.11 | 0.86  | -0.12 | 0.58  | 4.73  | -0.85 |
| OR7A10      | 390892 | NM_001005590 | 11706 | -0.75 | -0.23 | 0.64  | 0.31  | 0.43   | -0.22 | -0.64 | -0.59 | 0.38  | -0.34 | 0.52  | -0.85 |
| ZNF627      | 199692 | NM_145295    | 11707 | -0.57 | 0.23  | -0.47 | -0.39 | -0.19  | -0.11 | -0.67 | 0.00  | -0.18 | -0.82 | -0.69 | -0.85 |
| FLJ36155    | 148878 | NM_001001873 | 11708 | -1.12 | -1.25 | -0.63 | -0.17 | -0.62  | -0.10 | -0.17 | -0.62 | -0.10 | -0.98 | -0.20 | -0.85 |
| HPK4        | 147746 | NM_144685    | 11709 | -0.30 | -0.30 | -0.42 | -0.11 | -0.59  | -0.51 | 0.25  | -0.40 | -0.21 | -1.03 | -1.21 | -0.85 |
| HMTL13      | 10196  | NM_005788    | 11710 | -0.83 | -0.78 | -0.33 | -0.73 | -0.53  | -0.58 | -0.55 | -0.62 | 0.32  | -1.94 | -1.85 | -0.85 |
| MSL2        | 57380  | NM_020662    | 11711 | 0.00  | -0.73 | -0.58 | -0.47 | -0.55  | -0.25 | -0.17 | -0.42 | -0.27 | -1.30 | -1.27 | -0.85 |
| MSL415      | 150709 | NM_144708    | 11712 | 0.10  | -0.10 | 0.33  | -0.10 | -0.42  | -0.10 | -0.25 | -0.20 | -0.40 | 0.52  | 0.66  | -0.85 |
| IC90RF49    | 221044 | NM_145314    | 11713 | -0.40 | -0.05 | -0.13 | -0.12 | 0.24   | 0.04  | -0.42 | -0.16 | -0.28 | -0.59 | 0.16  | -0.85 |
| BRAF        | 673    | NM_040433    | 11714 | -0.45 | -0.89 | -1.07 | -0.13 | -0.56  | 0.15  | 0.07  | -0.25 | -0.67 | -2.42 | -0.55 | -0.85 |
| IC90RF29    | 54838  | NM_040491    | 11715 | -0.39 | -0.81 | -0.71 | -0.42 | -0.15  | -0.43 | -0.12 | -0.15 | -0.80 | -1.80 | -0.96 | -0.85 |
| FLJ2801     | 205860 | NM_173553    | 11716 | 0.70  | 0.46  | 0.68  | 0.40  | 0.46   | 1.26  | -0.02 | -0.33 | -0.51 | 1.84  | 2.12  | -0.86 |
| CAPN51      | 826    | NM_00103962  | 11717 | 0.08  | 0.20  | -0.11 | 0.68  | 0.40   | -0.38 | -0.64 | -0.09 | -0.13 | 0.01  | 0.70  | -0.86 |
| FLJ30525    | 11880  | NM_001010592 | 11718 | 0.15  | 0.70  | -0.57 | 0.17  | 0.45   | 0.15  | 0.45  | 0.02  | -0.42 | 0.45  | 0.62  | -0.86 |
| SMAD7       | 4092   | NM_005904    | 11719 | 0.55  | 0.57  | 0.15  | 1.26  | 1.57   | 1.93  | -0.36 | -0.03 | -0.46 | 1.27  | 4.77  | -0.86 |
| GFR1        | 2674   | NM_145793    | 11720 | 0.13  | -0.63 | -0.28 | 1.65  | 1.10   | 1.12  | 0.19  | -0.36 | -0.69 | -0.78 | 3.87  | -0.86 |
| MG42105     | 16759  | NM_153361    | 11721 | 0.09  | 0.31  | 0.08  | 1.38  | 1.66   | 0.93  | -0.31 | -0.62 | 0.08  | 0.46  | 3.98  | -0.86 |
| VP2         | 744    | NM_000426    | 11722 | 0.24  | 0.28  | 0.26  | 0.67  | 0.48   | 0.07  | 0.48  | 0.07  | 0.64  | 0.92  | 1.89  | -0.86 |
| LEPR        | 3953   | NM_001003680 | 11723 | -0.48 | -0.08 | -0.74 | 0.23  | 0.61   | 0.05  | -0.24 | -0.05 | -0.57 | -1.14 | 0.89  | -0.86 |
| SM1         | 6492   | NM_005068    | 11724 | -0.60 | -0.61 | -0.96 | -0.75 | -0.21  | -0.03 | 0.06  | -0.20 | -0.72 | -2.17 | -0.98 | -0.86 |
| MTX1A1      | 682    | NM_001617    | 11725 | 0.81  | 0.70  | 0.62  | 0.95  | 1.85   | 1.66  | 0.25  | 0.62  | 0.69  | 2.18  | 2.56  | -0.86 |
| TNEM171     | 134285 | NM_173490    | 11726 | 0.29  | 0.28  | 0.58  | 0.15  | 0.79   | 0.99  | -0.30 | -0.22 | -0.34 | 1.14  | 1.63  | -0.86 |
| ZNF599      | 148103 | NM_001007248 | 11727 | -0.30 | -1.03 | -1.06 | 0.06  | -0.43  | -0.31 | -0.13 | -0.37 | -0.36 | -2.38 | -0.68 | -0.86 |
| ASBP1       | 5482   | NM_001001873 | 11728 | 0.43  | -0.15 | -0.42 | 0.44  | 0.77   | 0.45  | 0.44  | 0.44  | 0.44  | 0.47  | 0.25  | -0.86 |
| OR8K3       | 219279 | NM_001005202 | 11729 | 0.64  | 0.77  | -0.83 | -0.16 | -0.43  | -1.42 | 0.56  | -0.20 | -0.10 | 2.40  | 2.01  | -0.86 |
| FOXF2       | 2295   | NM_001452    | 11730 | 0.04  | -0.52 | 0.07  | 0.48  | 0.87   | 0.29  | 0.00  | -0.80 | -0.05 | -0.42 | 1.63  | -0.86 |
| IMPACT      | 55364  | NM_018439    | 11731 | -0.27 | 0.00  | 0.39  | 0.41  | 0.32   | 1.39  | -0.34 | -0.05 | -0.48 | 0.12  | 2.08  | -0.86 |
| MRK13       | 116160 | NM_030920    | 11732 | -0.59 | -0.19 | -0.53 | -0.98 | -0.32  | -0.42 | -0.32 | -0.42 | -1.31 | -1.55 | -0.86 |       |
| SIAT9       | 8869   | NM_003896    | 11733 | -0.08 | -0.88 | 0.09  | 0.60  | 1.13   | 0.71  | 0.11  | -0.92 | -0.06 | -0.87 | 2.45  | -0.86 |
| MRGPR8      | 116534 | NM_001001395 | 11734 | -0.69 | -0.91 | -0.43 | -0.38 | -0.44  | -0.94 | -0.74 | -0.59 | 0.47  | -2.03 | -1.76 | -0.86 |
| IKN1A       | 1036   | NM_000389    | 11735 | -0.62 | -0.75 | -0.67 | -0.65 | -0.62  | -0.75 | -0.41 | -0.62 | -0.75 | -2.24 | -2.09 | -0.86 |
| LMO3        | 58885  | NM_001001395 | 11736 | -0.47 | 0.70  | 0.09  | 0.55  | 0.31</ |       |       |       |       |       |       |       |

|             |        |              |       |       |       |       |       |       |       |       |       |       |       |       |       |
|-------------|--------|--------------|-------|-------|-------|-------|-------|-------|-------|-------|-------|-------|-------|-------|-------|
| SCAMP4      | 113178 | NM_079884    | 11819 | 0.02  | -0.14 | -0.39 | -0.03 | -0.19 | 0.08  | -0.23 | -0.29 | -0.36 | -0.51 | -0.14 | -0.88 |
| EPHAR3      | 170836 | NM_015865    | 11820 | 0.02  | 0.00  | -0.07 | -0.02 | 0.19  | 1.83  | -0.23 | -0.27 | -0.28 | -0.47 | -0.05 | 0.68  |
| SMAP23      | 8773   | NM_130798    | 11821 | 0.63  | 0.01  | -0.29 | 0.60  | 0.18  | 0.47  | 0.14  | -0.41 | -0.61 | 0.35  | 1.25  | -0.89 |
| EPHAR       | 2046   | NM_001006943 | 11822 | -0.68 | -0.36 | -0.33 | 0.35  | 0.11  | -0.30 | -0.72 | -0.12 | -0.05 | -1.37 | 0.16  | -0.89 |
| RUTBC1      | 27552  | NM_015705    | 11823 | -0.10 | 0.19  | 0.56  | 0.02  | 0.62  | 0.40  | -0.21 | -0.44 | -0.23 | 0.66  | 1.04  | -0.89 |
| LOC14404    | 34440  | NM_0080825   | 11824 | 0.01  | 0.01  | 0.59  | 1.37  | 0.76  | 0.69  | -0.58 | -0.20 | 0.17  | 1.87  | 2.51  | -0.89 |
| GT2F1       | 2965   | NM_005316    | 11825 | 0.35  | -0.88 | -0.66 | -0.59 | -0.34 | -0.84 | -0.19 | -0.50 | -0.57 | -1.48 | -1.77 | -0.89 |
| FLI2675     | 282354 | NM_173811    | 11826 | 0.58  | 0.03  | 0.53  | 0.80  | 1.15  | 0.64  | -0.22 | -0.42 | -0.25 | 1.09  | 2.58  | -0.89 |
| FLI4881     | 8455   | NM_001866    | 11827 | 0.67  | 0.76  | 0.33  | -0.61 | 0.16  | -0.61 | -0.23 | -0.43 | -0.23 | 0.42  | 1.12  | -0.89 |
| COX7        | 1349   | NM_001866    | 11828 | -0.26 | -0.97 | 1.53  | 2.59  | 2.11  | 1.66  | -0.24 | -0.84 | 0.20  | 0.30  | 6.36  | -0.89 |
| BAMB        | 25805  | NM_012342    | 11829 | -1.10 | -0.92 | -1.57 | -1.85 | -1.18 | -1.68 | -0.03 | -0.39 | -0.47 | -3.59 | -4.71 | -0.89 |
| BDH1        | 289    | NM_001866    | 11830 | -0.44 | -0.50 | -0.28 | -0.70 | -0.47 | -0.55 | -0.17 | -0.15 | -0.17 | -0.32 | -0.34 | -0.89 |
| PCDH8       | 56131  | NM_018938    | 11831 | -0.44 | 0.15  | -0.25 | 0.49  | 0.57  | 0.08  | -0.26 | -0.22 | -0.41 | 0.54  | 1.15  | -0.89 |
| GABR2       | 2553   | NM_016655    | 11832 | -0.44 | 0.57  | 0.12  | 0.12  | -0.36 | 0.99  | -0.65 | 0.26  | -0.50 | 0.25  | 0.75  | -0.89 |
| ELMO2       | 9844   | NM_136042    | 11833 | -0.12 | -0.19 | 0.80  | 0.70  | 0.87  | 0.87  | -0.60 | -0.51 | 0.22  | 0.49  | 2.44  | -0.89 |
| PNZL5       | 5383   | NM_174930    | 11834 | 0.85  | 0.71  | -1.06 | -0.55 | 0.94  | -0.90 | -0.35 | 0.04  | -0.50 | 2.61  | 0.48  | -0.89 |
| DUSP15      | 128853 | NM_177991    | 11835 | -0.53 | -0.28 | -0.37 | -0.50 | -0.65 | -1.30 | -0.53 | -0.49 | 0.13  | -1.18 | -2.45 | -0.89 |
| BDOR81      | 523    | NM_000710    | 11836 | -0.62 | 0.00  | -0.47 | 0.05  | -0.04 | -0.55 | -0.74 | -0.16 | 0.01  | -1.09 | -0.55 | -0.89 |
| SLC15A3     | 80704  | NM_002543    | 11837 | 1.06  | 0.55  | 0.80  | 1.23  | 1.67  | 1.95  | -0.15 | -0.29 | -0.45 | 2.51  | 4.85  | -0.89 |
| DKFZP86C192 | 84233  | NM_032273    | 11838 | 0.75  | -0.42 | -0.33 | 0.90  | 0.95  | 0.92  | 0.32  | -0.72 | -0.50 | 0.01  | 2.77  | -0.89 |
| IL3AP       | 3556   | NM_134470    | 11839 | -0.15 | -0.30 | -0.39 | -0.49 | -0.40 | 0.44  | -0.11 | -0.26 | -0.52 | -0.83 | -0.45 | -0.89 |
| WR4         | 11159  | NM_007187    | 11840 | 0.16  | 0.50  | -0.14 | 0.17  | 0.12  | 0.01  | -0.37 | -0.12 | -0.41 | 0.53  | 0.30  | -0.89 |
| WDR20       | 91833  | NM_181302    | 11841 | 1.18  | 0.67  | 0.14  | 1.32  | 1.32  | 1.51  | 0.07  | -0.01 | -0.95 | 1.99  | 4.16  | -0.89 |
| SECL1       | 55763  | NM_178237    | 11842 | -1.25 | 0.31  | -0.22 | 0.01  | -0.24 | -0.44 | -0.93 | 0.07  | -0.03 | -1.17 | -0.66 | -0.89 |
| CDR138      | 158297 | NM_153707    | 11843 | 1.23  | 0.45  | 1.45  | 1.63  | 0.26  | 0.98  | -0.63 | -0.30 | 0.04  | 1.13  | 2.47  | -0.89 |
| PKCQ        | 5294   | NM_002649    | 11844 | -0.29 | -0.93 | -0.03 | 1.18  | 0.67  | 0.00  | -0.52 | -0.85 | 0.48  | -1.25 | 1.86  | -0.89 |
| MSA47       | 58475  | NM_206040    | 11845 | -1.00 | -1.14 | -1.19 | -0.40 | -0.61 | 0.80  | -0.87 | 0.82  | -0.84 | -3.33 | -0.21 | -0.89 |
| CABR4       | 57010  | NM_145200    | 11846 | 0.90  | -0.37 | -0.21 | -0.14 | -0.78 | 0.01  | 0.10  | -0.26 | -0.74 | 0.32  | -0.31 | -0.89 |
| E2F2        | 187    | NM_001866    | 11847 | -0.02 | 0.17  | 0.52  | 0.10  | 0.34  | -0.52 | 0.12  | -0.07 | -0.12 | 0.79  | 0.73  | -0.89 |
| FLI23554    | 79864  | NM_199124    | 11848 | -0.51 | 0.02  | -0.25 | -0.32 | 0.43  | 0.56  | -0.17 | -0.39 | -0.33 | -0.74 | 0.67  | -0.90 |
| SPR28       | 6701   | NM_00107418  | 11849 | 0.49  | 0.01  | 0.15  | 0.68  | 0.91  | 0.75  | -0.03 | -0.57 | -0.29 | 0.65  | 2.35  | -0.90 |
| SNHG        | 5180   | NM_005880    | 11850 | -0.46 | -1.11 | -0.38 | -0.76 | -1.22 | -0.46 | 0.33  | -0.46 | -0.33 | -0.94 | -1.50 | -0.90 |
| KIF4A       | 24137  | NM_012310    | 11851 | -0.47 | 1.02  | -0.91 | 0.39  | -0.74 | -1.11 | -0.20 | 0.40  | -0.30 | -2.40 | -1.47 | -0.90 |
| BNP         | 663    | NM_004330    | 11852 | 0.13  | 1.20  | 0.46  | 0.23  | 0.48  | 1.05  | -0.53 | -1.18 | -0.55 | 1.79  | 1.76  | -0.90 |
| RET         | 5979   | NM_020650    | 11853 | 0.00  | -0.31 | -0.18 | 0.55  | 0.44  | 0.08  | -0.24 | -0.53 | -0.12 | -0.50 | 1.03  | -0.90 |
| 927LZ       | 9274   | NM_040765    | 11854 | 0.62  | 0.37  | 0.27  | 0.50  | 0.00  | 0.00  | 0.27  | -0.50 | 0.00  | 0.62  | 1.02  | -0.90 |
| LAMB2       | 3913   | NM_002292    | 11855 | -0.72 | -0.46 | -0.77 | -0.36 | -0.22 | -0.67 | -0.52 | -0.36 | -0.02 | -1.96 | -1.25 | -0.90 |
| TULP1       | 7287   | NM_003232    | 11856 | -0.31 | -0.02 | -0.30 | -0.18 | -0.06 | -0.29 | -0.45 | -0.01 | -0.44 | -0.63 | -0.53 | -0.90 |
| TGCT1       | 2219   | NM_014498    | 11857 | 0.34  | 0.24  | 0.14  | 0.12  | -0.34 | 0.21  | -0.12 | -0.34 | 0.11  | 0.51  | 0.40  | -0.90 |
| FLI4638     | 440685 | NM_001007546 | 11858 | -0.36 | -0.33 | 0.19  | 0.05  | 0.46  | -0.40 | -0.53 | -0.50 | 0.14  | -0.50 | 0.11  | -0.90 |
| NHA         | 3623   | NM_002191    | 11859 | -1.01 | -1.50 | -0.17 | -2.15 | -1.13 | -0.14 | -0.31 | -0.59 | 0.01  | -2.69 | -3.42 | -0.90 |
| 15ST191C    | 1457   | NM_001866    | 11860 | 0.02  | 0.17  | 0.73  | 0.77  | 0.77  | 1.47  | 0.07  | -0.81 | -0.51 | -0.54 | 2.78  | -0.90 |
| ORF43       | 26688  | NM_001005224 | 11861 | -0.97 | 0.82  | 1.03  | 2.17  | 1.49  | 0.74  | -1.15 | -0.27 | 0.52  | 0.86  | 4.90  | -0.90 |
| TBX19       | 9095   | NM_005149    | 11862 | -0.46 | -0.77 | -1.21 | -0.57 | -1.20 | -0.94 | -0.34 | -0.12 | -0.45 | -2.45 | -2.71 | -0.90 |
| NMGCL       | 3155   | NM_000191    | 11863 | 0.07  | -0.51 | -0.63 | -0.54 | 0.97  | -0.32 | 0.08  | -0.71 | -0.27 | -1.06 | 1.10  | -0.90 |
| EFAP1       | 9918   | NM_048865    | 11864 | -0.98 | -0.16 | 0.44  | -0.66 | -0.43 | 0.06  | -0.13 | -0.56 | -0.10 | -0.59 | 0.79  | -0.90 |
| PNLP        | 5406   | NM_000936    | 11865 | -0.13 | 0.95  | -0.12 | 0.95  | 0.17  | 0.41  | -0.62 | 0.32  | -0.60 | 0.70  | 1.53  | -0.90 |
| PCTK3       | 51529  | NM_212502    | 11866 | -0.44 | -0.70 | 0.30  | 0.43  | 0.16  | -0.11 | -0.57 | -0.66 | 0.32  | -0.83 | -0.37 | -0.90 |
| 511T3       | 51123  | NM_016121    | 11867 | 0.66  | 1.02  | 0.60  | 1.50  | 0.64  | 0.56  | 0.12  | -0.64 | -0.10 | 0.38  | 3.51  | -0.90 |
| ASB11       | 140456 | NM_001012428 | 11868 | 0.26  | 1.07  | -0.40 | 0.74  | 1.37  | 2.05  | -0.12 | 0.07  | -0.85 | 0.93  | 4.17  | -0.90 |
| SEMA3F      | 6405   | NM_004186    | 11869 | -1.15 | -0.93 | -1.06 | -1.15 | -1.16 | -1.41 | -0.56 | -0.29 | -0.05 | -3.14 | -3.72 | -0.90 |
| CHCA        | 8018   | NM_001212    | 11870 | -0.17 | -0.27 | -1.16 | -0.70 | -0.25 | -0.46 | -0.27 | -0.16 | -0.25 | -0.46 | -2.21 | -0.90 |
| OD3         | 55714  | NM_173717    | 11871 | 1.36  | 0.34  | 0.37  | 0.15  | -0.01 | 0.59  | 0.49  | 0.22  | -0.63 | 0.73  | 0.72  | -0.90 |
| GNL1        | 2768   | NM_007353    | 11872 | -0.47 | -0.56 | -0.91 | -1.61 | 0.78  | 1.42  | -0.12 | -0.41 | -0.38 | -1.93 | 3.82  | -0.90 |
| MLK4        | 4638   | NM_053031    | 11873 | -1.14 | -1.21 | -0.98 | -1.63 | -1.06 | 0.50  | -0.74 | -0.84 | -0.81 | -3.34 | -2.14 | -0.90 |
| PCMG1A2     | 2602   | NM_030294    | 11874 | -0.07 | -0.02 | -0.97 | -0.02 | -0.97 | -0.02 | -0.82 | -0.17 | -0.56 | -2.05 | 2.07  | -0.90 |
| ERL2        | 10995  | NM_033266    | 11875 | -0.68 | -0.28 | -0.87 | 1.32  | 0.00  | 0.24  | -0.91 | -0.77 | -0.76 | -1.84 | 1.55  | -0.91 |
| FRN4        | 26235  | NM_012626    | 11876 | -0.61 | -0.62 | -0.78 | -0.43 | -0.04 | -0.50 | -0.25 | -0.60 | -0.05 | -2.00 | -0.97 | -0.91 |
| FRN41326    | 8417   | NM_014424    | 11877 | -0.21 | -0.48 | -0.18 | -0.14 | -0.10 | -0.23 | -0.14 | -0.10 | -0.10 | -0.88 | 0.99  | -0.91 |
| TRAPP6C     | 122553 | NM_177452    | 11878 | -0.60 | -0.08 | -0.22 | -0.06 | 0.02  | 0.23  | -0.64 | -0.14 | -0.12 | -0.89 | 0.19  | -0.91 |
| NTR2        | 23620  | NM_012344    | 11879 | -0.62 | -1.01 | 0.25  | 1.11  | 0.09  | 2.80  | 0.34  | -0.70 | -0.55 | -1.38 | 4.00  | -0.91 |
| TGFB3       | 7910   | NM_002943    | 11880 | -0.47 | -0.47 | -0.51 | -0.68 | -0.53 | -0.68 | -0.43 | -0.46 | -0.42 | -1.15 | 0.17  | -0.91 |
| ZNF129      | 51222  | NM_001102454 | 11881 | -0.55 | 1.04  | -0.87 | -1.24 | -1.47 | -1.01 | -0.59 | -0.31 | -0.01 | -2.97 | -3.72 | -0.91 |
| I14ORF79    | 122616 | NM_174891    | 11882 | -1.08 | -0.12 | -0.14 | 0.08  | 0.25  | 1.02  | -0.19 | -0.16 | -0.56 | -0.64 | 1.35  | -0.91 |
| ODX48       | 9975   | NM_014740    | 11883 | -1.73 | -1.70 | -1.95 | -3.07 | -2.56 | -2.98 | -0.65 | -0.89 | -0.67 | -3.36 | -8.52 | -0.91 |
| SR          | 389    | NM_000894    | 11884 | 0.38  | 1.11  | 0.47  | 0.88  | 0.53  | 1.21  | 0.53  | 0.22  | 0.41  | 1.96  | 3.40  | -0.91 |
| GABRG1      | 25665  | NM_173536    | 11885 | 0.63  | -1.18 | -0.64 | 0.09  | 0.26  | -0.40 | -0.09 | -0.30 | -0.52 | -1.05 | -0.91 | -0.91 |
| FLI5139     | 400667 | NM_001010692 | 11886 | -0.08 | 0.33  | -0.92 | 0.21  | 0.90  | -0.41 | 0.11  | -0.28 | -0.74 | -0.67 | 0.70  | -0.91 |
| 345         | 345    | NM_000204    | 11887 | 0.22  | 0.10  | -0.28 | 0.09  | 0.12  | 0.09  | -0.16 | -0.44 | -0.15 | 0.40  | 0.40  | -0.91 |
| SOX17       | 64321  | NM_022454    | 11888 | 1.10  | 0.58  | 0.41  | 1.90  | 1.39  | 1.54  | 0.06  | -0.44 | -0.53 | 2.09  | 4.83  | -0.91 |
| C4BPB       | 725    | NM_001017366 | 11889 | 0.91  | -0.02 | 0.23  | 1.03  | 0.88  | -0.21 | -0.18 | -0.57 | -0.16 | 1.12  | 1.70  | -0.91 |
| PHL3        | 2594   | NM_001480    | 11890 | 1.96  | 0.86  | 0.41  | 4.02  | 3.19  | 1.72  | 0.16  | -0.40 | -0.13 | 6.53  | 9.10  | -0.91 |
| FLI1342     | 55347  | NM_018394    | 11891 | -0.27 | 0.06  | 0.13  | 1.14  | 0.43  | 0.20  | -0.37 | -0.28 | -0.28 | 0.88  | 1.77  | -0.91 |
| PE6BETA     | 57859  | NM_020699    | 11892 | -0.52 | -0.77 | -0.69 | -0.67 | -0.69 | -0.66 | -0.25 | -0.47 | -0.19 | -1.88 | -2.03 | -0.91 |
| FLI387A     | 219888 | NM_152716    | 11893 | -0.42 | 0.72  | 0.57  | 0.68  | 0.01  | 0.69  | -0.80 | -0.02 | -0.09 | 0.86  | 1.32  | -0.91 |
| SLITK5      | 2605   | NM_015647    | 11894 | -0.02 | 0.03  | 0.25  | 0.09  | 0.45  | 0.29  | 0.09  | -0.45 | 0.20  | 0.17  | 0.91  | -0.91 |
| PREP        | 5550   | NM_002726    | 11895 | -0.06 | -0.22 | 0.04  | 0.73  | 0.00  | 0.31  | -0.44 | -0.37 | -0.10 | -0.24 | 1.04  | -0.91 |
| CHCHD4      | 131474 | NM_144636    | 11896 | -1.14 | -0.57 | -0.21 | 1.44  | 2.40  | 1.31  | -0.07 | -0.49 | -0.35 | -0.89 | 5.15  | -0.91 |
| PI1         | 15156  | NM_015021    | 11897 | -0.41 | -0.83 | -1.67 | -0.65 | -1.18 | -0.67 | -0.65 | -0.67 | -0.65 | -1.91 | -4.43 | -0.91 |
| RDH14       | 57665  | NM_020905    | 11898 | 0.04  | -0.43 | -0.47 | 0.85  | 0.12  | 1.05  | -0.36 | -0.28 | -0.27 | -0.87 | 2.0   |       |

|              |        |              |       |       |       |       |       |       |       |       |       |       |       |       |       |
|--------------|--------|--------------|-------|-------|-------|-------|-------|-------|-------|-------|-------|-------|-------|-------|-------|
| DEFB106      | 245909 | NM_152251    | 11981 | -0.45 | -1.72 | -0.34 | -0.26 | -3.11 | -0.59 | -0.37 | -0.62 | 0.05  | -2.50 | -3.95 | -0.94 |
| DECA         | 8890   | NM_016672    | 11982 | 1.27  | 0.78  | -0.74 | -0.22 | 3.18  | 2.97  | -1.39 | -0.48 | 1.36  | 1.87  | 2.41  | -0.94 |
| SLC37A2      | 219855 | NM_198277    | 11983 | -0.67 | -0.46 | -0.18 | -0.01 | -0.43 | -0.25 | -0.56 | -0.24 | -0.14 | -1.31 | -0.68 | -0.94 |
| ITC13        | 79573  | NM_001122835 | 11984 | -0.67 | -0.28 | 0.25  | -0.21 | -0.40 | 0.39  | -0.69 | -0.14 | -0.10 | -0.70 | -0.22 | -0.94 |
| AKAP1        | 8185   | NM_003488    | 11985 | 0.28  | -0.45 | -0.25 | 0.08  | 0.22  | 0.54  | 0.14  | -0.46 | -0.62 | -0.33 | 0.83  | -0.94 |
| TEFAP        | 2681   | NM_001949    | 11986 | 0.53  | 0.53  | 0.26  | 0.32  | 0.22  | 0.16  | -0.75 | -0.16 | -0.35 | -1.15 | 0.14  | -0.94 |
| MTX2         | 10651  | NM_006654    | 11987 | 0.19  | -1.09 | -0.84 | -0.31 | 0.12  | -0.68 | 0.37  | -0.85 | -0.46 | -1.65 | -0.86 | -0.94 |
| NSF          | 4905   | NM_006178    | 11988 | 2.11  | 1.12  | 1.60  | 4.65  | 4.16  | 4.24  | -0.40 | -0.56 | 0.03  | 4.82  | 13.05 | -0.94 |
| FTF81        | 575    | NM_175847    | 11989 | 0.31  | 0.11  | 0.11  | 0.11  | 0.11  | 0.11  | 0.89  | 0.23  | -0.12 | 0.82  | 3.16  | -0.94 |
| NM051476     | 147906 | NM_145056    | 11990 | 0.28  | 0.66  | -0.04 | 0.00  | -0.27 | 0.20  | -0.71 | 0.07  | -0.30 | -0.36 | -0.08 | -0.94 |
| FNAL1        | 3373   | NM_153286    | 11991 | 0.65  | -0.37 | -1.63 | -0.50 | 0.67  | 0.48  | 0.74  | -0.46 | -1.22 | -1.35 | 0.65  | -0.94 |
| ND1991       | 2987   | NM_001991    | 11992 | -0.50 | -0.07 | -0.16 | -0.07 | 0.17  | 0.45  | -0.67 | -0.45 | -0.76 | -1.24 | 4.76  | -0.94 |
| PE10         | 23989  | NM_001040152 | 11993 | 0.24  | 0.07  | -0.12 | -0.42 | 0.23  | 0.39  | -0.50 | -0.15 | -0.30 | -0.29 | 0.20  | -0.94 |
| GN2T         | 2651   | NM_145655    | 11994 | 0.09  | -0.35 | 0.07  | 1.13  | 0.45  | 0.65  | -0.40 | -0.35 | -0.19 | -0.19 | 2.24  | -0.94 |
| SGC2         | 137868 | NM_139107    | 11995 | -0.41 | -0.34 | -0.44 | -0.66 | -0.67 | -0.88 | -0.33 | -0.49 | -0.13 | -1.79 | -2.21 | -0.94 |
| HEM2         | 7941   | NM_002507    | 11996 | 0.34  | -0.45 | -0.58 | -0.97 | -0.73 | -0.44 | -0.41 | -0.12 | -0.42 | -1.77 | 2.14  | -0.94 |
| RUFY2        | 55680  | NM_017987    | 11997 | -0.25 | -0.58 | 0.03  | 0.50  | 1.58  | -0.25 | -0.23 | -0.92 | 0.20  | -0.80 | 1.83  | -0.95 |
| SN1          | 6464   | NM_183901    | 11998 | 0.74  | 1.55  | 0.89  | 2.08  | 2.50  | 1.30  | -0.30 | -0.33 | -0.32 | 3.18  | 5.88  | -0.95 |
| LOC15249     | 51246  | NM_016486    | 11999 | -0.14 | 0.21  | 0.59  | 0.92  | 0.65  | 0.63  | -0.47 | -0.22 | -0.16 | 0.66  | 2.20  | -0.95 |
| FLJ52728     | 164127 | NM_152610    | 12000 | -0.97 | -0.50 | 0.75  | 0.35  | -0.60 | -0.15 | -0.98 | -0.44 | 0.47  | -0.72 | -0.40 | -0.95 |
| ELOV16       | 79071  | NM_024090    | 12001 | -0.24 | 0.08  | -0.06 | 0.80  | 1.19  | 1.73  | -0.12 | 0.07  | -0.90 | -0.21 | 3.72  | -0.95 |
| PH3          | 54886  | NM_017173    | 12002 | 0.34  | 0.75  | -0.30 | 1.05  | 0.58  | 0.35  | -0.59 | 0.08  | -0.44 | 0.79  | 1.98  | -0.95 |
| ZFV619       | 84936  | NM_032850    | 12003 | -0.37 | -1.14 | -0.38 | -0.30 | 0.76  | 0.99  | -0.33 | -1.11 | 0.49  | -1.89 | -0.54 | -0.95 |
| FLJ2635      | 80162  | NM_025092    | 12004 | -0.22 | 0.04  | 0.11  | 0.12  | 1.39  | 0.89  | -0.08 | -0.50 | -0.37 | -0.06 | 2.40  | -0.95 |
| NG3          | 220159 | NM_145719    | 12005 | -0.70 | -0.92 | -0.23 | 0.09  | -0.38 | -0.09 | -0.92 | -0.89 | 0.86  | -1.84 | -0.35 | -0.95 |
| CP8A1        | 141    | NM_005208    | 12006 | 0.12  | 0.01  | 0.57  | 0.16  | 0.64  | 0.96  | -0.46 | -0.28 | -0.21 | 0.70  | 1.76  | -0.95 |
| FLJ16231     | 388661 | NM_001084001 | 12007 | 0.53  | 0.67  | 1.04  | 1.60  | 1.84  | 2.33  | -0.42 | -0.10 | -0.43 | 2.25  | 5.77  | -0.95 |
| IL4          | 11009  | NM_181339    | 12008 | 0.55  | -0.59 | -0.20 | 0.12  | 0.69  | 0.13  | 0.10  | -0.71 | -0.34 | -0.25 | 0.94  | -0.95 |
| LOC38187     | 260245 | NM_001013626 | 12009 | 1.34  | 0.00  | 0.18  | 0.66  | 1.19  | 0.63  | 0.19  | 0.40  | -0.94 | -1.32 | 0.50  | -0.95 |
| SFR54        | 6429   | NM_005626    | 12010 | -0.38 | -0.05 | -0.89 | 0.05  | 0.19  | 0.26  | -0.41 | -0.10 | -0.40 | -0.30 | 0.90  | -0.95 |
| OR13C8       | 138802 | NM_001040483 | 12011 | -0.05 | 0.58  | -0.73 | 0.51  | -0.24 | 0.63  | -0.52 | 0.49  | -0.93 | -0.20 | 0.90  | -0.95 |
| SNH          | 8224   | NM_133663    | 12012 | -0.78 | -0.78 | 0.21  | -0.07 | -0.82 | 0.60  | -0.07 | -0.82 | 0.60  | -0.41 | 1.42  | -0.95 |
| NB081        | 190    | NM_000475    | 12013 | 0.66  | -0.59 | 0.30  | 0.59  | -0.38 | 0.65  | -0.27 | -0.21 | -0.48 | 0.37  | 0.85  | -0.95 |
| SNY2BP       | 55333  | NM_018373    | 12014 | 0.75  | 0.19  | 0.36  | 2.13  | 1.82  | 1.45  | -0.29 | -0.36 | -0.31 | 1.30  | 5.40  | -0.95 |
| LMDC         | 4007   | NM_006150    | 12015 | 0.18  | -0.18 | 0.56  | 1.23  | 0.90  | 0.85  | -0.42 | -0.39 | -0.14 | 0.56  | 2.98  | -0.95 |
| HR24BP       | 6384   | NM_001621    | 12016 | 0.20  | 0.75  | 0.34  | 0.65  | 0.47  | 0.64  | -0.54 | -0.44 | 0.21  | 1.42  | 1.42  | -0.95 |
| KIR3DL2      | 3812   | NM_006737    | 12017 | 1.85  | 1.42  | 1.18  | 2.60  | 2.57  | 2.21  | -0.25 | -0.39 | -0.32 | 4.45  | 7.37  | -0.95 |
| SL181        | 26939  | NM_198935    | 12018 | 0.66  | -0.36 | 0.14  | -0.12 | -0.11 | 0.06  | -0.56 | -0.39 | 0.00  | -0.87 | -0.29 | -0.96 |
| FLJ2223      | 791    | NM_001098966 | 12019 | 0.12  | 0.08  | 0.45  | 1.17  | 0.62  | 0.45  | 0.17  | -0.15 | -0.15 | 0.48  | 0.35  | -0.96 |
| TRO          | 7216   | NM_177557    | 12020 | 0.05  | 0.38  | -0.10 | 0.75  | 0.86  | 0.01  | -0.60 | 0.04  | -0.40 | 0.33  | 1.59  | -0.96 |
| C10RF32      | 387597 | NM_199151    | 12021 | 0.76  | -0.34 | -0.47 | 0.69  | 1.23  | 1.45  | 0.58  | 0.84  | -0.69 | -0.05 | 3.37  | -0.96 |
| SN           | 2334   | NM_002352    | 12022 | -0.27 | -0.40 | -0.52 | -0.27 | -0.40 | -0.52 | -0.27 | -0.40 | -0.52 | -0.27 | -0.40 | -0.96 |
| SN1          | 27944  | NM_014390    | 12023 | 0.40  | -0.02 | -0.28 | -0.23 | 0.16  | 1.03  | 0.12  | -0.38 | -0.69 | 0.67  | 0.96  | -0.96 |
| OPH1         | 4983   | NM_002547    | 12024 | -0.22 | -0.10 | -0.20 | 0.18  | -0.60 | -0.32 | -0.52 | -0.29 | -0.14 | -0.53 | -0.73 | -0.96 |
| MG32104      | 147657 | NM_144884    | 12025 | -0.42 | -0.54 | -0.66 | -0.11 | -0.41 | -0.36 | -0.31 | -0.50 | -0.15 | -1.63 | -0.68 | -0.96 |
| FAM2C        | 5697   | NM_020623    | 12026 | 0.46  | 0.11  | 0.28  | 0.40  | 0.63  | 0.81  | 0.44  | -0.10 | -0.10 | 0.29  | 2.21  | -0.96 |
| MV13         | 4634   | NM_000258    | 12027 | 0.26  | 0.05  | 0.17  | 1.56  | 1.35  | 0.37  | -0.32 | -0.37 | -0.27 | 0.48  | 3.28  | -0.96 |
| TNFSF12-TNFS | 407977 | NM_172089    | 12028 | -0.79 | -0.91 | -0.96 | -0.97 | -0.99 | -0.47 | -0.18 | -0.31 | -0.47 | -2.66 | -2.43 | -0.96 |
| PH5          | 1142   | NM_020906    | 12029 | 0.07  | 0.40  | 0.79  | 0.40  | 0.79  | 0.40  | 0.16  | 0.50  | 0.16  | 0.32  | 3.09  | -0.96 |
| HMAP4        | 55303  | NM_018326    | 12030 | -0.40 | -0.98 | -0.00 | -0.04 | -0.09 | 0.04  | -0.36 | -0.71 | 0.10  | -1.58 | -0.09 | -0.96 |
| ORS1         | 44215  | NM_030946    | 12031 | -0.43 | -0.82 | 0.03  | -0.46 | -0.61 | -0.29 | -0.48 | -0.66 | 0.18  | -1.23 | -1.36 | -0.96 |
| FLJ3042      | 27126  | NM_0016585   | 12032 | -0.68 | -0.01 | -0.38 | -0.68 | -0.45 | -0.11 | -0.38 | -0.44 | -0.55 | -1.03 | -1.03 | -0.96 |
| OTDS         | 150577 | NM_148961    | 12033 | 0.20  | 0.08  | -0.29 | 0.16  | 0.43  | -0.09 | -0.23 | -0.20 | -0.53 | 0.41  | 0.50  | -0.96 |
| TR16         | 126382 | NM_176880    | 12034 | 1.13  | 0.20  | -0.83 | 0.69  | 0.77  | 0.17  | 0.00  | -0.48 | -0.48 | 0.11  | 1.62  | -0.96 |
| OR16         | 18882  | NM_00104457  | 12035 | 0.49  | 0.81  | 0.90  | 1.58  | 1.54  | 1.19  | -0.59 | -0.35 | -0.02 | 2.20  | 4.33  | -0.96 |
| TAC1         | 9144   | NM_004783    | 12036 | -0.32 | 0.51  | -0.52 | -0.32 | -0.28 | -0.01 | -0.43 | -0.38 | 0.44  | -0.15 | 1.19  | -0.96 |
| LOC15294     | 115294 | NM_025937    | 12037 | -0.29 | -0.07 | 0.00  | 1.35  | 0.76  | 0.72  | -0.43 | -0.33 | -0.20 | -0.37 | 2.83  | -0.96 |
| MHPA1        | 3178   | NM_002136    | 12038 | -0.80 | -1.13 | -1.35 | -1.00 | -1.08 | -0.85 | -0.20 | -0.43 | -0.34 | -0.28 | -2.94 | -0.96 |
| FLJ191       | 5770   | NM_002837    | 12039 | 0.10  | -0.42 | -0.42 | 0.10  | -0.42 | -0.42 | 0.10  | -0.42 | -0.42 | 0.10  | 0.62  | -0.96 |
| FR1Q         | 23413  | NM_014286    | 12040 | -0.06 | 0.15  | 0.17  | -0.73 | -0.44 | 0.04  | -0.28 | -0.26 | -0.42 | 0.25  | -1.13 | -0.96 |
| JNPF         | 4012   | NM_179290    | 12041 | 1.17  | 1.08  | 1.15  | 1.19  | 1.76  | 1.89  | -0.26 | -0.23 | -0.48 | 3.04  | 4.84  | -0.96 |
| RS1          | 3857   | NM_025548    | 12042 | 0.65  | -0.35 | -0.60 | 0.72  | -0.22 | 0.10  | -0.11 | -0.23 | -0.60 | -0.24 | 0.63  | -0.96 |
| OR152        | 219998 | NM_001004559 | 12043 | 1.00  | 1.03  | -0.63 | 0.20  | -1.03 | 0.32  | -0.62 | -0.04 | -0.29 | -0.34 | 0.51  | -0.96 |
| SSBP2        | 23635  | NM_012446    | 12044 | 0.79  | 1.81  | 0.58  | 1.97  | 1.43  | 2.58  | -0.42 | 0.09  | -0.64 | 3.19  | 5.98  | -0.96 |
| UMAN1        | 79748  | NM_021819    | 12045 | -1.21 | -1.09 | -0.89 | -1.74 | -1.39 | -1.36 | -0.48 | -0.48 | 0.00  | -1.15 | -4.49 | -0.96 |
| EGENT7       | 9364   | NM_145236    | 12046 | 0.29  | 0.61  | 0.61  | 0.29  | 0.61  | 0.61  | 0.45  | -0.10 | -0.43 | 1.43  | 2.10  | -0.96 |
| LTBP2        | 4053   | NM_000428    | 12047 | -0.50 | -0.37 | -0.78 | -0.03 | 0.63  | 1.29  | -0.10 | -0.12 | -0.74 | -1.65 | 1.89  | -0.96 |
| STARS        | 137735 | NM_139166    | 12048 | -0.17 | 0.24  | 0.23  | 0.44  | 0.59  | 0.60  | -0.51 | -0.38 | -0.07 | 0.30  | 1.63  | -0.96 |
| FLJ24407     | 5734   | NM_001817    | 12049 | -0.67 | -0.58 | -0.44 | -0.67 | -0.58 | -0.44 | -0.67 | -0.58 | -0.44 | -0.67 | -0.58 | -0.96 |
| FLJ5530      | 400798 | NM_207467    | 12050 | -0.54 | -0.74 | 0.04  | -0.12 | 0.61  | -0.45 | -0.26 | -0.78 | 0.08  | -1.24 | 0.05  | -0.96 |
| HP           | 3240   | NM_005143    | 12051 | -0.98 | -0.91 | -0.42 | -0.41 | 0.34  | -0.09 | -0.67 | -0.33 | 0.03  | -2.31 | -0.16 | -0.97 |
| LOC3046      | 12289  | NM_0016595   | 12052 | -0.32 | -0.38 | -0.65 | -0.13 | -0.14 | -0.65 | -0.13 | -0.14 | -0.65 | -0.13 | -0.14 | -0.97 |
| GN7          | 2798   | NM_052947    | 12053 | 0.63  | 0.59  | -0.48 | 0.21  | -0.02 | 0.17  | 0.75  | 0.47  | -0.69 | 0.52  | 0.36  | -0.97 |
| CP1          | 7545   | NM_003412    | 12054 | 0.09  | -0.14 | 0.03  | 0.42  | 0.20  | 0.33  | -0.13 | -0.55 | -0.28 | -0.03 | 0.95  | -0.97 |
| COP3         | 8533   | NM_003063    | 12055 | 0.19  | -0.39 | -0.49 | -0.03 | 1.43  | 1.88  | 0.23  | -0.26 | -0.94 | -0.70 | 2.79  | -0.97 |
| LOC4645      | 402427 | NM_001055513 | 12056 | -0.48 | -0.39 | -0.19 | 0.15  | 0.71  | 0.57  | 0.44  | -0.42 | -0.19 | 0.32  | 0.25  | -0.97 |
| BTR          | 8945   | NM_003939    | 12057 | -0.66 | -0.45 | -0.59 | -0.59 | -0.20 | -0.58 | 0.50  | -0.24 | -0.23 | -1.70 | -1.37 | -0.97 |
| PBP          | 5037   | NM_002567    | 12058 | -0.21 | -0.84 | 0.06  | 0.06  | 0.34  | 1.21  | 0.14  | -0.74 | -0.36 | -1.00 | 1.60  | -0.97 |
| PH1          | 239    | NM_002248    | 12059 | 0.25  | 0.39  | 0.29  | 0.25  | 0.39  | 0.29  | 0.13  | -0.05 | -0.43 | 0.84  | 1.15  | -0.97 |
| NMKR50       | 57182  | NM_002037    | 12060 | 0.43  | -0.38 | 0.23  | -0.19 | 1.50  | 0.84  | 0.18  | -0.73 | -0.42 | 0.28  |       |       |

|            |        |              |       |       |       |       |       |       |       |       |       |       |       |       |       |
|------------|--------|--------------|-------|-------|-------|-------|-------|-------|-------|-------|-------|-------|-------|-------|-------|
| MATP       | 51151  | NM_016180    | 12143 | 1.83  | 0.79  | 1.34  | 1.61  | 1.31  | 1.32  | -0.06 | -0.52 | -0.42 | 8.96  | 4.24  | -1.00 |
| RTD-9295   | 8149   | NM_016122    | 12144 | 0.80  | -0.12 | 0.86  | 0.77  | 0.80  | 1.12  | 0.38  | -0.71 | 0.43  | 0.27  | 1.80  | -1.01 |
| SBD5A2L2   | 253017 | NM_001010874 | 12145 | -0.58 | -0.46 | -1.16 | 0.09  | -0.49 | -0.72 | -0.32 | 0.02  | -0.71 | -2.21 | -1.12 | -1.00 |
| FLJ3507    | 389136 | NM_016206    | 12146 | -0.58 | 0.21  | -0.74 | -0.46 | -0.36 | -0.05 | -0.40 | -0.06 | -0.53 | -1.11 | -0.87 | -1.00 |
| FLJ10204   | 55959  | NM_018204    | 12147 | -0.53 | -0.08 | -0.17 | 0.48  | -0.03 | 1.19  | 0.18  | -0.49 | -0.68 | 0.28  | 1.64  | -1.00 |
| DKCAN11    | 5745   | NM_01446     | 12148 | 1.41  | 1.35  | 0.02  | 0.81  | 0.20  | 0.88  | 0.20  | 0.56  | 0.84  | 1.94  | 4.24  | -1.00 |
| GUCY2D     | 3000   | NM_000180    | 12149 | -0.26 | -0.23 | -0.05 | -0.03 | 0.23  | 0.04  | -0.40 | -0.25 | -0.36 | -0.54 | 0.24  | -1.00 |
| SMH2       | 6478   | NM_005067    | 12150 | 5.83  | 11.79 | 6.08  | 5.62  | 8.72  | 5.18  | -0.08 | -0.48 | -0.44 | 23.71 | 19.52 | -1.00 |
| DC328385   | 20335  | NM_024565    | 12151 | -0.70 | -0.58 | -0.59 | -0.12 | 0.17  | 0.67  | 0.17  | -0.17 | 0.17  | -0.10 | 1.13  | -1.00 |
| RMF169     | 254225 | NM_495886    | 12152 | 5.79  | 9.98  | 6.17  | 10.21 | 7.97  | 10.29 | -0.20 | -0.33 | -0.48 | 10.94 | 28.48 | -1.00 |
| SPH13      | 8877   | NM_021972    | 12153 | -0.28 | 0.33  | -0.52 | 0.34  | 0.40  | 1.09  | -0.11 | -0.05 | -0.84 | 0.10  | 1.83  | -1.00 |
| STIC       | 16449  | NM_000700    | 12154 | -0.47 | 0.54  | -0.07 | 0.25  | 0.60  | 0.61  | -0.61 | -0.56 | -0.60 | -0.29 | 1.77  | -1.00 |
| SLSA53     | 6526   | NM_006933    | 12155 | -0.67 | 0.05  | 0.15  | 0.55  | 0.00  | 0.81  | 0.60  | 0.00  | 0.40  | 0.57  | 1.36  | -1.00 |
| MGC39725   | 132141 | NM_152197    | 12156 | -0.02 | 0.64  | 0.19  | 1.30  | 1.30  | 1.19  | 0.45  | -0.21 | -0.34 | 0.81  | 3.59  | -1.00 |
| KCNQ3      | 3796   | NM_004519    | 12157 | -1.80 | -1.08 | -1.17 | -0.81 | -0.53 | 0.39  | 0.06  | -0.29 | -0.77 | -1.04 | -0.96 | -1.00 |
| FLJ14166   | 79616  | NM_004565    | 12158 | -0.70 | -0.60 | -0.03 | -0.18 | 0.35  | 0.05  | -0.19 | -0.61 | -0.20 | -1.34 | 0.22  | -1.00 |
| TEA3       | 7005   | NM_003214    | 12159 | 1.53  | 0.78  | -0.52 | 1.73  | 0.26  | 1.62  | -0.32 | 0.30  | -0.98 | 1.79  | 3.61  | -1.00 |
| AMOTL1     | 154810 | NM_130847    | 12160 | -0.73 | -0.80 | -0.80 | -0.76 | -0.60 | -0.55 | -0.44 | -0.32 | -0.25 | -2.33 | -1.91 | -1.00 |
| C17orf38   | 146850 | NM_001010855 | 12161 | 0.21  | 0.74  | 0.06  | 1.53  | 1.65  | 1.54  | -0.15 | -0.29 | -0.47 | 1.02  | 4.72  | -1.00 |
| LOC196264  | 196264 | NM_198275    | 12162 | 1.99  | -0.39 | -0.47 | 0.35  | 0.97  | 2.02  | 0.63  | -0.73 | -0.91 | 1.13  | 3.34  | -1.00 |
| MAGE04     | 81557  | NM_177335    | 12163 | 0.11  | -0.94 | -0.97 | 0.09  | -0.70 | -0.69 | -0.37 | -0.17 | -0.47 | -1.80 | -1.29 | -1.01 |
| UGT1       | 1939   | NM_000893    | 12164 | 0.26  | -0.32 | -0.12 | 0.56  | 0.51  | -0.34 | -0.47 | -0.44 | -0.10 | -0.19 | 0.76  | -1.01 |
| GNAC       | 2776   | NM_002072    | 12165 | 0.20  | 0.53  | -0.46 | 0.05  | 0.39  | -0.18 | -0.58 | -0.15 | -0.27 | 0.13  | 0.27  | -1.01 |
| MYOM1      | 8736   | NM_003803    | 12166 | 0.27  | 0.64  | 2.14  | 2.09  | 1.86  | 1.41  | -0.62 | -0.75 | 0.37  | 3.05  | 5.35  | -1.01 |
| BMF1       | 548    | NM_006130    | 12167 | -0.01 | -0.45 | -0.59 | 0.78  | 1.39  | 0.09  | -0.32 | -0.41 | -0.27 | -1.05 | 2.23  | -1.01 |
| ZNF44      | 5170   | NM_016504    | 12168 | -0.97 | -0.86 | -0.73 | -0.56 | -0.81 | 0.00  | -0.36 | 0.06  | -0.71 | -1.96 | -1.28 | -1.01 |
| SIRT7      | 51547  | NM_016538    | 12169 | -0.76 | 0.88  | -0.65 | 0.85  | 1.62  | 0.61  | -0.77 | 0.53  | -0.77 | -0.53 | 3.08  | -1.01 |
| GPCR6A     | 225245 | NM_148963    | 12170 | 0.30  | -0.22 | -0.40 | -0.14 | 0.29  | 0.47  | 0.27  | -0.66 | -0.61 | -0.32 | 0.62  | -1.01 |
| ITP5B      | 506    | NM_001686    | 12171 | -1.06 | -1.13 | -1.27 | -1.06 | -1.13 | -1.27 | -1.06 | -1.13 | -1.27 | -1.06 | -1.13 | -1.01 |
| MARX3      | 115123 | NM_178450    | 12172 | 2.58  | 6.19  | 3.72  | 6.22  | 3.62  | 3.19  | -0.42 | -0.22 | -0.37 | 12.49 | 13.03 | -1.01 |
| UCN        | 7349   | NM_003353    | 12173 | -1.15 | 1.13  | 0.97  | 3.75  | 2.47  | 1.90  | -1.31 | 0.79  | -0.49 | 0.95  | 8.12  | -1.01 |
| SPHNB62    | 16489  | NM_001664    | 12174 | -0.62 | -0.83 | 0.11  | -0.60 | -0.58 | 0.07  | -0.44 | -0.44 | -0.44 | -1.44 | -0.42 | -1.01 |
| TCF21      | 6943   | NM_003206    | 12175 | 0.17  | 0.66  | 0.94  | 1.83  | 1.30  | 1.82  | -0.64 | -0.10 | -0.27 | 1.43  | 4.94  | -1.01 |
| CHAF1A     | 10036  | NM_005483    | 12176 | -0.48 | -0.77 | -0.31 | -0.25 | -0.73 | 0.06  | -0.50 | -0.03 | -0.48 | -1.56 | -0.92 | -1.01 |
| C5orf128   | 99207  | NM_001012446 | 12177 | -0.57 | 0.88  | 0.14  | 0.52  | 0.89  | 0.58  | -0.77 | 0.06  | -0.30 | 0.24  | 1.99  | -1.01 |
| AD31       | 8385   | NM_003021    | 12178 | 0.38  | 0.17  | 0.38  | 0.41  | 1.05  | 0.60  | 0.19  | -0.66 | -0.41 | 1.58  | 2.76  | -1.01 |
| DKF2P43405 | 54758  | NM_017566    | 12179 | 0.03  | -0.65 | 0.00  | -0.18 | 0.34  | 0.36  | -0.04 | -0.63 | -0.35 | -0.63 | 0.53  | -1.01 |
| CYP21A2    | 1589   | NM_000500    | 12180 | -0.58 | -0.39 | -0.66 | -0.08 | -0.14 | 0.73  | -0.50 | -0.24 | -0.28 | -1.63 | -0.78 | -1.01 |
| P2RY5      | 2297   | NM_001010    | 12181 | -0.53 | 0.11  | 0.47  | 0.89  | 1.80  | 1.23  | 0.15  | -0.47 | -0.89 | 1.82  | 0.02  | -1.01 |
| PTPRN      | 10161  | NM_005767    | 12182 | 1.09  | 0.33  | 1.13  | 1.30  | 1.53  | 2.74  | -0.20 | -0.33 | -0.49 | 2.55  | 5.57  | -1.01 |
| PTPRN      | 5774   | NM_002829    | 12183 | -0.63 | -0.75 | -0.25 | 0.00  | -0.51 | -0.36 | -0.63 | -0.34 | -0.04 | -1.62 | -0.87 | -1.01 |
| MEGAB2     | 5661   | NM_001029    | 12184 | 0.21  | 0.03  | -0.33 | -0.20 | -0.33 | -0.33 | -0.20 | -0.33 | -0.33 | 0.70  | 2.41  | -1.01 |
| BAX        | 581    | NM_138763    | 12185 | 0.01  | -0.15 | -0.82 | -0.17 | 0.64  | -0.28 | -0.07 | -0.29 | -0.66 | -0.48 | 0.18  | -1.01 |
| FLJ13621   | 9662   | NM_025009    | 12186 | -0.62 | 0.53  | 0.04  | 0.14  | 0.82  | 0.72  | -0.31 | -0.34 | -0.37 | -0.40 | 1.67  | -1.01 |
| ZNF208     | 7757   | NM_007153    | 12187 | 0.88  | -0.44 | -0.04 | 1.05  | 0.44  | 1.04  | -0.15 | -0.41 | -0.45 | 0.40  | 2.53  | -1.01 |
| AFH        | 327    | NM_006440    | 12188 | 1.03  | 0.94  | 0.32  | 0.71  | 0.96  | 0.65  | -0.57 | -0.63 | -0.57 | 2.25  | 0.91  | -1.01 |
| ENSA       | 2029   | NM_007168    | 12189 | 0.32  | 0.04  | 0.34  | 0.94  | 0.36  | 0.67  | -0.11 | -0.47 | -0.43 | 0.65  | 1.98  | -1.01 |
| FLJ25414   | 124783 | NM_152343    | 12190 | -0.85 | -0.91 | -0.92 | -1.19 | -0.57 | -0.11 | -0.20 | -0.30 | -0.51 | -2.68 | -1.87 | -1.01 |
| CFHNA22    | 28454  | NM_001010969 | 12191 | -0.52 | 0.15  | 0.58  | 0.67  | 1.12  | 0.67  | -0.11 | -0.11 | -0.11 | -0.11 | 0.49  | -1.01 |
| FLJ1070    | 52723  | NM_018286    | 12192 | -0.78 | 0.00  | -0.10 | 1.73  | 1.21  | 1.73  | -0.92 | -0.49 | -0.58 | -0.68 | 4.67  | -1.01 |
| FBO17      | 115290 | NM_148169    | 12193 | -1.03 | -1.13 | -0.29 | -0.01 | 0.15  | -0.31 | -0.75 | -0.74 | 0.47  | -2.44 | -0.17 | -1.01 |
| SPH4       | 397    | NM_000380303 | 12194 | -1.52 | -0.15 | 0.34  | 1.46  | 1.24  | 0.96  | -0.60 | -0.60 | -0.60 | -1.60 | 1.87  | -1.01 |
| LOC3033    | 284415 | NM_199481    | 12195 | 0.61  | 1.47  | 0.94  | 2.37  | 0.92  | 2.03  | 0.73  | 0.32  | 0.61  | 3.03  | 5.31  | -1.02 |
| ART5       | 116969 | NM_053017    | 12196 | 0.19  | -0.26 | -0.49 | 0.93  | 0.81  | 1.34  | 0.24  | -0.51 | -0.74 | -0.55 | 3.08  | -1.02 |
| FLJ19151   | 153830 | NM_144726    | 12197 | 2.79  | 5.34  | 5.55  | 6.27  | 4.39  | 7.09  | -0.41 | -0.34 | -0.27 | 14.29 | 17.74 | -1.02 |
| RNF2       | 5445   | NM_008993    | 12198 | -0.05 | 0.37  | 0.12  | 0.22  | 0.32  | 0.26  | -0.12 | -0.36 | -0.41 | 0.26  | 3.41  | -1.02 |
| LOC130576  | 130576 | NM_177964    | 12199 | -0.61 | -0.74 | 0.11  | -0.15 | 0.72  | 0.23  | -0.44 | -0.66 | 0.08  | -1.24 | 0.81  | -1.02 |
| POP7       | 10248  | NM_005837    | 12200 | 0.66  | -0.42 | -0.72 | 0.32  | 0.66  | 0.82  | 0.40  | -0.57 | -0.84 | -0.48 | 1.80  | -1.02 |
| LOC107129  | 107129 | NM_001010811 | 12201 | 0.32  | 0.44  | 0.47  | 0.54  | 0.67  | 0.34  | 0.54  | 0.67  | 0.34  | 0.54  | 0.67  | -1.02 |
| SELL       | 6402   | NM_000655    | 12202 | 0.74  | 0.16  | 0.37  | 0.47  | 0.56  | 1.18  | -0.20 | -0.21 | -0.61 | 1.27  | 2.21  | -1.02 |
| RF13-36c.1 | 728911 | NM_152582    | 12203 | 0.29  | -1.13 | -1.04 | 0.30  | 0.26  | 0.06  | 0.70  | -0.81 | -0.91 | -1.89 | 0.63  | -1.02 |
| EFEBP2     | 1979   | NM_0010996   | 12204 | -0.36 | -1.17 | -1.02 | -0.62 | -1.12 | -0.97 | -0.84 | -0.05 | -0.60 | -1.60 | -0.86 | -1.02 |
| LOC342357  | 342357 | NM_001012981 | 12205 | 0.96  | 0.82  | -0.90 | -0.19 | 0.37  | -0.90 | 0.00  | -0.26 | -0.75 | 0.64  | 0.34  | -1.02 |
| SULT1A4    | 445329 | NM_001017390 | 12206 | -0.79 | -0.62 | -0.78 | -0.58 | -0.69 | -0.65 | -0.43 | 0.01  | -0.60 | -2.19 | -1.92 | -1.02 |
| MGC2963    | 84840  | NM_031298    | 12207 | -0.81 | 0.09  | -0.05 | 0.61  | 0.67  | 1.02  | -0.77 | 0.07  | -0.31 | -0.76 | 2.30  | -1.02 |
| NELL2      | 475    | NM_006159    | 12208 | -0.51 | 0.01  | 0.39  | 0.35  | -0.22 | 0.60  | -0.35 | -0.22 | -0.60 | -0.88 | 0.83  | -1.02 |
| SH3BP5     | 9467   | NM_001018009 | 12209 | 0.77  | 0.44  | 0.06  | 1.97  | 0.84  | 0.23  | -0.31 | -0.32 | -0.38 | 1.27  | 3.04  | -1.02 |
| P101-PRK   | 23533  | NM_014108    | 12210 | -0.57 | -0.54 | -0.75 | -0.73 | -0.97 | -0.74 | -0.42 | -0.11 | -0.49 | -1.87 | -2.44 | -1.02 |
| LOC3423    | 102    | NM_005216    | 12211 | 0.25  | 0.25  | 0.99  | 0.26  | 0.25  | 0.99  | 0.26  | 0.25  | 0.99  | 0.26  | 0.25  | -1.02 |
| TRIM5      | 85363  | NM_033992    | 12212 | 4.00  | 2.91  | 3.37  | 7.19  | 4.97  | 9.71  | -0.41 | -0.40 | -0.21 | 10.28 | 16.31 | -1.02 |
| FLJ35630   | 166379 | NM_152618    | 12213 | 0.05  | -0.37 | 0.64  | 1.25  | 0.47  | 0.70  | -0.49 | -0.68 | 0.15  | 0.32  | 2.43  | -1.02 |
| BTBD4      | 197    | NM_001732    | 12214 | -0.37 | -0.49 | -0.36 | -0.32 | -0.32 | -0.32 | -0.32 | -0.32 | -0.32 | -0.32 | -0.32 | -1.02 |
| GALNT14    | 78623  | NM_024572    | 12215 | 0.23  | 0.95  | -0.61 | 0.51  | -0.88 | 0.52  | -0.14 | -0.36 | -0.52 | 1.79  | 0.15  | -1.02 |
| MNT        | 4335   | NM_020310    | 12216 | 0.62  | 0.01  | 0.45  | 1.98  | 1.25  | 1.69  | -0.11 | -0.36 | -0.55 | 1.07  | 4.92  | -1.02 |
| PRK2       | 5590   | NM_00101582  | 12217 | -0.11 | -0.83 | -0.35 | 0.63  | 0.61  | 1.32  | 0.12  | -0.69 | -0.45 | -1.49 | 2.37  | -1.02 |
| IGF5       | 9154   | NM_006057    | 12218 | 1.14  | 0.04  | 0.59  | 0.74  | 0.40  | 0.74  | -0.40 | -0.36 | -0.40 | 0.43  | 0.59  | -1.02 |
| FLNC       | 2318   | NM_001458    | 12219 | -1.10 | -0.86 | -0.54 | -0.49 | -0.71 | -1.02 | -0.65 | -0.45 | -0.67 | -2.50 | -2.22 | -1.02 |
| KMAA11     | 57579  | NM_020819    | 12220 | -0.51 | -0.22 | -0.32 | 0.59  | 1.11  | 1.98  | 0.10  | -0.45 | -0.67 | -0.03 | 3.67  | -1.02 |
| CACNA1C    | 775    | NM_002179    | 12221 | -0.28 | 0.60  | 0.47  | 0.42  | 0.60  | 0.42  | 0.34  | 0.65  | -0.11 | 0.90  | 2.13  | -1.02 |
| SEC24B     | 10427  | NM_00104234  | 12222 | -0.42 | 0.17  | 0.49  |       |       |       |       |       |       |       |       |       |

|           |        |              |       |       |       |       |       |       |       |       |       |       |       |       |       |
|-----------|--------|--------------|-------|-------|-------|-------|-------|-------|-------|-------|-------|-------|-------|-------|-------|
| SMN11     | 2916   | NM_013323    | 12305 | 1.47  | -0.20 | -0.28 | 4.64  | 1.90  | 3.86  | -0.16 | -0.34 | 0.54  | 0.99  | 10.40 | -1.05 |
| BRP1      | 1800   | NM_014613    | 12306 | -0.33 | -0.80 | -0.91 | -0.07 | -0.17 | -0.63 | -0.44 | -0.30 | 0.56  | -0.27 | -1.01 | -1.05 |
| CTSS      | 1520   | NM_004079    | 12307 | 1.00  | 0.87  | -1.07 | -1.04 | -0.52 | -0.21 | -0.33 | 0.08  | -0.80 | -0.20 | -1.77 | -1.05 |
| ST18      | 9705   | NM_014682    | 12308 | 0.38  | -0.32 | -0.36 | -0.08 | 0.89  | 0.25  | -0.15 | -0.42 | -0.48 | -0.31 | 1.06  | -1.05 |
| PKT1      | 5127   | NM_006201    | 12309 | -1.35 | -1.46 | -1.39 | -2.30 | -2.16 | -1.97 | -0.09 | -0.26 | -0.69 | -4.20 | -6.43 | -1.05 |
| FCM2C4    | 5613   | NM_014683    | 12310 | 0.48  | 0.30  | -0.20 | 1.22  | 0.02  | 0.00  | 0.00  | 0.00  | 1.05  | 0.10  | 0.45  | -1.05 |
| BMP7      | 655    | NM_001719    | 12311 | 0.89  | 0.30  | 0.43  | 1.37  | 1.25  | 2.94  | -0.18 | -0.31 | -0.56 | 1.61  | 5.56  | -1.05 |
| MAGE02    | 10916  | NM_014699    | 12312 | -0.55 | -0.83 | -0.80 | -0.96 | -0.23 | 1.36  | -0.04 | -0.40 | -0.61 | -2.18 | 0.17  | -1.05 |
| DISC2     | 8150   | NM_014696    | 12313 | 0.78  | 0.21  | -0.49 | 0.34  | 0.28  | 0.19  | -0.43 | -0.28 | -0.46 | -1.58 | 0.94  | -1.05 |
| SNIA2     | 6591   | NM_003068    | 12314 | -0.11 | -1.28 | -0.63 | 0.92  | 0.13  | 0.15  | -0.17 | -0.78 | 0.44  | -2.02 | 0.90  | -1.05 |
| OR13C3    | 138803 | NM_001091961 | 12315 | 0.13  | 0.02  | 0.22  | 1.10  | 0.36  | 1.51  | -0.46 | -0.43 | -0.16 | 0.37  | 2.97  | -1.05 |
| MG130876  | 8074   | NM_014698    | 12316 | -0.34 | 0.13  | -0.34 | -0.14 | 0.13  | -0.25 | -0.14 | -0.25 | -0.14 | -0.21 | 1.89  | -1.05 |
| ABCC12    | 94160  | NM_003326    | 12317 | 0.36  | 0.76  | 0.96  | -0.74 | -0.65 | -0.76 | -0.07 | -0.43 | -0.56 | -2.07 | -1.15 | -1.05 |
| MRP9      | 64968  | NM_032476    | 12318 | -0.38 | -0.35 | -1.07 | -0.55 | -0.06 | -0.25 | 0.17  | -0.47 | -0.75 | -1.79 | -0.86 | -1.05 |
| OR5B12    | 290191 | NM_00104733  | 12319 | -0.56 | -0.98 | -1.03 | -0.62 | -0.76 | 0.12  | 0.05  | -0.39 | -0.71 | -2.57 | -1.25 | -1.05 |
| ZNF917    | 118490 | NM_00104593  | 12320 | -0.35 | 0.12  | -0.11 | -0.47 | 0.48  | 0.25  | -0.44 | -0.57 | 0.04  | 0.34  | 0.24  | -1.05 |
| FCGT      | 2217   | NM_004107    | 12321 | -0.95 | -0.33 | 0.41  | 0.26  | 0.04  | 0.38  | -0.84 | -0.31 | 0.10  | -0.80 | 0.60  | -1.05 |
| IGF4C     | 199731 | NM_145296    | 12322 | -0.98 | -0.98 | -0.94 | -1.22 | -1.08 | -0.31 | -0.43 | -0.17 | -0.46 | -2.98 | -2.62 | -1.05 |
| ZNF52     | 54811  | NM_001656    | 12323 | 0.45  | 1.18  | -0.22 | 2.55  | 3.00  | 2.46  | -0.49 | 0.15  | -0.71 | 1.41  | 0.01  | -1.05 |
| LARGE     | 9215   | NM_133642    | 12324 | -0.47 | 0.04  | 0.00  | 0.73  | 0.72  | 1.14  | -0.54 | -0.21 | -0.30 | -0.51 | 2.58  | -1.05 |
| RALGAP5   | 9649   | NM_014636    | 12325 | -0.08 | 0.67  | 0.08  | 1.52  | 0.54  | 0.61  | -0.67 | -0.05 | -0.33 | 0.66  | 2.67  | -1.05 |
| TNF2      | 26277  | NM_012461    | 12326 | 0.29  | 0.38  | -0.01 | 0.25  | 1.38  | 1.06  | 0.69  | -0.65 | -0.49 | 0.66  | 2.69  | -1.05 |
| TBP       | 6988   | NM_003194    | 12327 | -0.67 | -0.54 | -0.17 | -0.17 | -0.72 | -0.28 | 0.66  | -0.16 | -0.23 | -1.38 | -0.27 | -1.05 |
| TAPBP     | 6892   | NM_172209    | 12328 | -1.04 | -1.15 | -0.97 | -0.34 | -0.66 | -0.82 | -0.32 | -0.42 | -0.31 | -3.16 | -1.81 | -1.05 |
| DMBT1     | 1755   | NM_004006    | 12329 | 0.64  | 0.61  | 0.13  | 1.18  | 1.26  | 0.81  | -0.24 | -0.31 | -0.51 | 1.38  | 3.25  | -1.05 |
| KLZ12     | 43868  | NM_145995    | 12330 | 0.22  | 0.08  | 0.17  | 0.38  | 0.28  | 0.97  | -0.45 | -0.10 | -0.51 | 0.47  | 1.63  | -1.05 |
| CFOR21    | 83900  | NM_013434    | 12331 | -0.26 | -0.17 | -0.15 | 0.75  | -0.55 | 0.63  | -0.45 | -0.29 | -0.32 | -0.58 | 0.83  | -1.06 |
| DCBLD2    | 131566 | NM_080927    | 12332 | 0.09  | -0.51 | -0.70 | -0.19 | 0.14  | 0.43  | 0.11  | -0.45 | -0.72 | -1.11 | 0.41  | -1.06 |
| TOX4      | 10146  | NM_015795    | 12333 | 0.52  | 0.31  | 0.57  | 0.52  | 1.31  | 0.12  | 0.62  | 1.01  | 0.31  | 0.75  | 1.61  | -1.06 |
| SEPPIN1   | 462    | NM_000488    | 12334 | -0.18 | -0.15 | -0.47 | 0.64  | 1.07  | 0.02  | -0.06 | -0.60 | -0.39 | -0.80 | 1.68  | -1.06 |
| CORO7     | 79585  | NM_024335    | 12335 | -0.81 | -0.34 | -0.11 | 0.29  | -0.41 | 0.66  | -0.83 | -0.10 | -0.13 | -1.26 | 0.55  | -1.06 |
| MGC7771   | 285237 | NM_013824    | 12336 | 0.02  | -0.14 | 0.00  | -0.17 | 0.60  | -0.20 | -0.16 | -0.20 | -0.16 | -0.09 | 1.27  | -1.06 |
| PTD008    | 51398  | NM_016145    | 12337 | 1.46  | 0.02  | 0.05  | 2.19  | 0.07  | 1.31  | 0.00  | -0.35 | -0.71 | 1.13  | 3.57  | -1.06 |
| FLU2043   | 55011  | NM_017916    | 12338 | 0.12  | -0.27 | 0.16  | 0.88  | 0.16  | 0.61  | -0.27 | -0.41 | -0.37 | 0.01  | 1.65  | -1.06 |
| ACLS      | 2181   | NM_203572    | 12339 | -0.55 | 0.18  | 0.24  | 1.51  | 1.31  | 1.27  | -0.85 | -0.35 | -0.05 | -1.13 | 4.09  | -1.06 |
| UL44      | 54968  | NM_024989    | 12340 | 0.36  | 0.11  | -0.11 | 0.11  | 0.28  | 0.56  | -0.28 | -0.56 | -0.49 | 0.36  | 1.26  | -1.06 |
| NECAP2    | 55707  | NM_018900    | 12341 | 2.43  | 0.69  | 0.00  | 1.18  | 1.42  | 0.74  | 0.00  | -0.53 | -0.52 | 3.13  | 4.34  | -1.06 |
| KRTAP47   | 85287  | NM_033061    | 12342 | 1.68  | 0.03  | 1.11  | 2.59  | 1.90  | 1.46  | -0.03 | -0.78 | -0.25 | 2.83  | 4.95  | -1.06 |
| TWIS      | 595    | NM_000205    | 12343 | -0.46 | 0.12  | -0.23 | -0.12 | -0.02 | 0.68  | -0.20 | -0.20 | -0.20 | -0.78 | 0.90  | -1.06 |
| EVER1     | 11322  | NM_007267    | 12344 | 0.56  | 0.10  | -0.48 | 0.35  | 0.18  | 0.25  | -0.20 | -0.42 | -0.43 | -0.20 | 0.29  | -1.06 |
| TNME16A   | 55107  | NM_018043    | 12345 | -0.84 | -0.55 | -1.11 | -0.91 | -0.59 | -0.68 | -0.55 | 0.18  | -0.69 | -2.51 | -1.28 | -1.06 |
| NR        | 6249   | NM_001040    | 12346 | 1.36  | 2.50  | 0.14  | 2.10  | 2.55  | 2.21  | 0.70  | -0.51 | -0.51 | 3.62  | 6.68  | -1.06 |
| CYP3A7    | 1551   | NM_000765    | 12347 | -0.36 | -0.28 | 0.03  | 0.58  | 1.12  | 2.76  | -0.59 | -0.58 | 0.11  | -0.61 | 4.45  | -1.06 |
| ONER      | 92737  | NM_139072    | 12348 | -0.77 | -0.22 | -0.13 | 1.93  | 1.61  | 0.87  | 0.07  | -0.73 | -0.40 | 0.22  | 4.41  | -1.06 |
| LAVU4     | 1996   | NM_021952    | 12349 | -1.25 | -1.52 | -1.34 | -1.76 | -1.66 | -0.72 | -0.44 | -0.36 | -0.26 | -4.12 | -4.14 | -1.06 |
| DHRS1     | 118187 | NM_138652    | 12350 | 0.72  | 0.19  | 0.09  | 0.30  | 0.39  | 0.10  | -0.11 | -0.09 | -0.11 | 1.69  | 0.36  | -1.06 |
| KIAA1009  | 22832  | NM_014895    | 12351 | -0.95 | -0.16 | -0.02 | 0.34  | 0.23  | -0.02 | -0.91 | -0.16 | -0.02 | -1.13 | 0.55  | -1.06 |
| DUGAP2    | 92328  | NM_004745    | 12352 | -0.29 | 0.59  | -0.62 | 0.29  | 0.31  | 0.10  | -0.41 | -0.23 | -0.42 | -0.32 | 0.70  | -1.06 |
| TFR7      | 1236   | NM_025238    | 12353 | 0.24  | 0.44  | -0.70 | 0.14  | -0.24 | 0.44  | -0.13 | -0.24 | 0.44  | -0.07 | 0.24  | -1.06 |
| TBC1D20   | 128637 | NM_144628    | 12354 | -1.01 | -0.34 | 0.32  | 0.85  | 0.76  | 0.94  | -0.80 | -0.15 | -0.12 | -1.03 | 2.55  | -1.06 |
| SUC19A2   | 10560  | NM_000996    | 12355 | 0.66  | 0.71  | 1.24  | 1.83  | 2.23  | 1.23  | -0.36 | -0.59 | -0.12 | 2.62  | 5.29  | -1.06 |
| ICE       | 1510   | NM_001664    | 12356 | 0.48  | 0.42  | -0.34 | 0.45  | 0.43  | 0.43  | -0.45 | -0.43 | -0.43 | -0.45 | 1.74  | -1.06 |
| MMP25     | 64886  | NM_022718    | 12357 | 0.32  | 0.30  | -0.78 | 0.35  | -0.38 | -0.23 | -0.52 | -0.06 | -0.47 | -1.40 | -0.27 | -1.06 |
| KTERF     | 7978   | NM_006880    | 12358 | 0.77  | 0.30  | 0.17  | 0.61  | 1.08  | 0.62  | 0.02  | -0.45 | -0.64 | 1.25  | 2.31  | -1.06 |
| MIR1      | 2829   | NM_00124644  | 12359 | 0.70  | -0.06 | 0.00  | 0.99  | 0.77  | 0.54  | -0.35 | -0.74 | 0.03  | 0.64  | 2.31  | -1.06 |
| GN2       | 8549   | NM_0310104   | 12360 | 1.05  | 1.05  | 1.24  | 1.61  | 1.01  | 1.21  | 0.16  | 0.11  | 0.11  | 0.33  | 0.63  | -1.06 |
| FLU10922  | 55260  | NM_018273    | 12361 | -0.68 | -0.27 | -1.20 | -0.53 | -0.42 | 0.30  | -0.62 | 0.35  | -0.79 | -1.61 | -0.65 | -1.06 |
| CTNNA3    | 29139  | NM_013266    | 12362 | -0.31 | 0.01  | 0.45  | 0.89  | 0.57  | 0.14  | -0.64 | -0.48 | 0.06  | -0.15 | 0.60  | -1.06 |
| SEMA3A    | 8482   | NM_000612    | 12363 | 0.38  | 0.27  | 0.38  | 0.79  | 0.59  | 0.38  | -0.79 | -0.31 | -0.31 | 1.23  | 0.77  | -1.06 |
| C12ORF55  | 54943  | NM_001040192 | 12364 | 0.46  | -0.20 | 0.39  | 0.80  | -0.23 | -0.22 | -0.85 | -0.44 | 0.22  | -0.27 | 0.35  | -1.06 |
| CD5L      | 922    | NM_005894    | 12365 | -0.81 | -1.02 | -0.70 | -1.18 | -0.65 | 0.18  | -0.79 | -0.29 | 0.01  | -2.53 | -0.65 | -1.06 |
| STK16     | 8975   | NM_00101434  | 12366 | -0.05 | -0.72 | -0.07 | -0.13 | 0.17  | -0.46 | -0.13 | -0.17 | -0.46 | -1.47 | 1.44  | -1.06 |
| SOM       | 57822  | NM_198174    | 12367 | -1.07 | 0.27  | -1.12 | 0.16  | -0.18 | 0.12  | -0.77 | 0.52  | -0.83 | -2.46 | 0.10  | -1.06 |
| GALR2     | 8811   | NM_003857    | 12368 | -0.78 | -0.83 | -1.31 | -1.11 | -0.93 | -0.83 | 0.30  | -0.60 | -0.76 | -2.93 | -2.86 | -1.06 |
| MGC3731   | 79159  | NM_024513    | 12369 | -1.48 | -1.41 | -1.61 | -1.69 | -1.13 | -1.38 | -0.25 | -0.54 | -0.27 | -4.50 | -4.21 | -1.06 |
| MKORF34   | 28469  | NM_00029888  | 12370 | -0.10 | 0.23  | -0.23 | 0.23  | 0.68  | 0.58  | 0.02  | 0.68  | 0.02  | 0.68  | 0.15  | -1.06 |
| C10ORF76  | 79591  | NM_024541    | 12371 | -0.14 | -0.63 | 0.05  | 0.91  | 0.78  | 0.27  | -0.30 | -0.69 | -0.07 | -0.71 | 1.96  | -1.06 |
| RPS1      | 23212  | NM_015169    | 12372 | -0.82 | -0.95 | -0.96 | -1.08 | -0.62 | -0.94 | -0.23 | -0.51 | -0.33 | -2.73 | -2.64 | -1.06 |
| IR12      | 82     | NM_000930    | 12373 | 0.48  | 0.62  | 0.60  | 0.48  | 0.62  | 0.60  | 0.48  | 0.62  | 0.60  | 0.48  | 0.62  | -1.06 |
| MAPKAP1   | 79109  | NM_00106618  | 12374 | 0.18  | -0.82 | -0.63 | -1.06 | -0.13 | -0.10 | 0.10  | -0.55 | -0.61 | -1.27 | -0.30 | -1.06 |
| HEATR1    | 55127  | NM_018072    | 12375 | -0.76 | -0.53 | -1.48 | -1.27 | -0.71 | -0.59 | -0.25 | 0.00  | -0.82 | -2.77 | -2.58 | -1.07 |
| TGFB2     | 17059  | NM_130789    | 12376 | -0.72 | 0.41  | 0.60  | 0.77  | 0.17  | 0.17  | -0.77 | -0.17 | -0.17 | -0.29 | 1.36  | -1.07 |
| SUZC4     | 6517   | NM_001042    | 12377 | 0.44  | 0.38  | 0.50  | 0.20  | 0.40  | 0.43  | 0.50  | -0.65 | 0.09  | -0.67 | 0.02  | -1.07 |
| CA3       | 761    | NM_005181    | 12378 | 0.23  | 0.13  | -0.65 | 1.09  | 1.19  | 0.41  | -0.19 | -0.22 | -0.65 | -0.55 | 2.69  | -1.07 |
| LOC152385 | 152385 | NM_144718    | 12379 | 1.11  | -0.63 | -0.58 | 0.56  | 1.21  | 1.54  | 0.38  | -0.70 | -0.75 | -0.10 | 3.31  | -1.07 |
| ZNF264    | 9559   | NM_00010360  | 12380 | 0.75  | 0.51  | 0.71  | 0.07  | 0.45  | 0.05  | 0.07  | -0.46 | -0.46 | 0.46  | 0.47  | -1.07 |
| ORF102    | 25903  | NM_015441    | 12381 | -0.96 | -0.36 | -0.33 | -0.30 | -0.26 | 0.76  | -0.82 | -0.44 | 0.19  | -1.65 | -1.32 | -1.07 |
| KIAA1799  | 84455  | NM_032437    | 12382 | 0.82  | 0.88  | 0.24  | 1.97  | 2.10  | 1.03  | -0.23 | -0.35 | -0.49 | 1.94  | 5.10  | -1.07 |
| ATOH1     | 22032  | NM_145178    | 12383 | 0.52  | 0.76  | 0.55  | 0.12  | 0.12  | 0.12  | 0.12  | -0.12 | -0.12 | 1.74  | 1.35  | -1.07 |
| TSGA13    | 114960 | NM_052933    | 12384 | -0.46 | 0.11  | -0.23 | 0.55  | 1.08  | 1.19  | -0.52 | 0.24  | 0.79  | 0.42  | 2.82  | -1.07 |

|            |        |              |       |       |       |       |       |       |       |       |       |       |       |       |       |
|------------|--------|--------------|-------|-------|-------|-------|-------|-------|-------|-------|-------|-------|-------|-------|-------|
| TMV52      | 7108   | NM_003273    | 12467 | -0.91 | 0.10  | -1.03 | -0.06 | -0.51 | -0.26 | -0.79 | 0.26  | -0.56 | -1.84 | -0.62 | -1.09 |
| SPW51      | 2289   | NM_012148    | 12468 | -0.10 | 0.20  | 0.37  | -0.02 | 0.02  | 1.28  | -0.71 | 0.26  | -0.56 | -0.71 | 0.26  | -0.56 |
| LGAL59     | 3965   | NM_002308    | 12469 | -1.00 | 0.35  | -0.37 | 2.71  | 1.87  | 0.87  | -1.17 | -0.82 | 0.89  | -1.71 | 0.47  | -1.10 |
| HMT        | 5083   | NM_016522    | 12470 | -0.43 | -0.08 | -0.54 | 1.52  | 0.62  | 0.64  | 0.37  | -0.76 | -0.70 | -1.04 | 2.79  | -1.10 |
| TAFA3      | 28467  | NM_182759    | 12471 | -1.13 | 0.63  | -0.79 | 1.67  | 1.64  | 1.15  | -0.04 | -0.09 | -0.97 | 0.97  | 4.46  | -1.10 |
| TC1D11     | 2316   | NM_015173    | 12472 | -0.48 | 0.48  | 0.62  | 0.40  | -0.12 | -0.72 | 0.46  | -0.10 | -0.40 | 0.70  | 0.07  | -1.10 |
| GGA2       | 23062  | NM_015044    | 12473 | -2.28 | -0.27 | 0.09  | -0.16 | 0.40  | 0.31  | -0.34 | -0.57 | -0.19 | -0.47 | 0.56  | -1.10 |
| FLU5422    | 44140  | NM_001004349 | 12474 | -0.29 | -1.18 | 0.08  | 0.73  | 1.16  | 0.75  | -0.25 | -0.49 | -0.35 | -0.40 | 2.65  | -1.10 |
| ATV9181    | 32     | 12475        | 12475 | 0.47  | 0.41  | 0.41  | 0.47  | 0.41  | 2.74  | -0.61 | 0.65  | 0.74  | 0.65  | 0.42  | -1.10 |
| OR13C4     | 138004 | NM_00101919  | 12476 | -0.55 | 1.69  | 0.44  | 1.17  | 1.05  | 1.57  | 0.72  | 0.14  | -0.52 | 1.58  | 3.79  | -1.10 |
| FLU4054    | 79614  | NM_024563    | 12477 | -0.13 | -0.66 | -0.22 | 0.01  | 0.36  | 0.69  | -0.45 | -0.66 | 0.01  | -1.02 | 1.06  | -1.10 |
| HW1C1      | 4913   | NM_004786    | 12478 | -0.56 | -0.67 | -0.67 | -0.56 | -0.67 | -0.67 | -0.56 | -0.67 | -0.67 | -1.90 | 0.59  | -1.10 |
| GATAG      | 2627   | NM_005257    | 12479 | 1.08  | 0.63  | -0.68 | 0.61  | 0.91  | 0.78  | 0.04  | -0.25 | -0.89 | 1.03  | 2.30  | -1.10 |
| TRHDE      | 29953  | NM_013381    | 12480 | -0.64 | -0.41 | 0.07  | 0.11  | 0.30  | -0.28 | -0.43 | -0.59 | -0.09 | -0.98 | 0.13  | -1.10 |
| TDPI       | 55775  | NM_001008744 | 12481 | -0.35 | 0.40  | -0.06 | 0.45  | 0.43  | 0.13  | -0.64 | -0.16 | -0.31 | -0.01 | 0.99  | -1.10 |
| PRSS22     | 64663  | NM_0022119   | 12482 | -1.49 | -0.35 | -1.01 | -1.16 | -1.09 | 0.50  | -0.42 | 0.16  | -0.84 | -0.96 | 3.86  | -1.10 |
| MGC11266   | 79172  | NM_024322    | 12483 | -1.25 | 0.81  | -1.18 | 0.22  | -0.50 | -0.48 | -1.06 | 0.81  | -0.85 | -1.61 | -0.76 | -1.10 |
| KMA0792    | 9725   | NM_014698    | 12484 | 0.30  | -0.10 | -0.28 | 0.17  | -0.06 | 0.04  | -0.36 | -0.41 | -0.33 | -0.08 | 0.15  | -1.10 |
| LUP1       | 7798   | NM_003621    | 12485 | -0.79 | -0.03 | 0.08  | 0.40  | 0.11  | 0.11  | -0.54 | -0.25 | -0.20 | -0.75 | 0.61  | -1.10 |
| AQPR       | 343    | NM_001169    | 12486 | -0.27 | -0.62 | -1.06 | -0.18 | -0.49 | -1.46 | -0.29 | -0.44 | -0.37 | -1.95 | -1.13 | -1.10 |
| ABR        | 29     | NM_001092    | 12487 | -0.10 | -0.61 | -0.25 | -0.60 | 0.05  | 0.89  | 0.09  | -0.40 | -0.79 | -0.96 | 0.33  | -1.10 |
| SC9N2      | 9807   | NM_138355    | 12488 | -0.84 | -0.70 | -0.19 | 1.08  | 0.10  | 0.20  | -0.95 | -0.74 | 0.58  | -1.73 | 1.38  | -1.10 |
| TSR1       | 54507  | NM_025008    | 12489 | -0.40 | -0.03 | -1.11 | -0.66 | 1.08  | -0.02 | -0.09 | -0.28 | -0.74 | -1.53 | 0.40  | -1.11 |
| WSR2       | 55884  | NM_018639    | 12490 | -0.28 | -0.53 | -0.57 | -0.09 | -0.12 | -0.11 | -0.20 | -0.41 | -0.50 | -1.37 | -0.33 | -1.11 |
| LDN2       | 1907   | NM_001956    | 12491 | -1.09 | -1.89 | 0.30  | -1.17 | -2.69 | -0.94 | -0.75 | -0.84 | 0.49  | -2.67 | -4.90 | -1.11 |
| UR1A3      | 50613  | NM_017481    | 12492 | -0.11 | -0.35 | 0.05  | 1.16  | 0.00  | -0.11 | -0.57 | -0.58 | 0.09  | -0.41 | 1.05  | -1.11 |
| SLCGA20    | 54716  | NM_022405    | 12493 | 0.00  | 0.04  | -0.43 | 0.26  | -0.10 | 0.34  | -0.38 | -0.18 | -0.55 | -0.39 | 0.51  | -1.11 |
| NY05925    | 89882  | NM_001001875 | 12494 | -0.85 | -0.87 | -0.87 | -0.30 | 0.03  | 0.02  | -0.62 | -0.01 | -0.47 | -2.59 | -0.25 | -1.11 |
| 574925     | 574925 | NM_020979    | 12495 | -0.58 | -0.38 | -0.48 | -0.12 | -0.38 | -0.12 | -0.62 | -0.12 | -0.43 | -1.43 | 0.27  | -1.11 |
| CKN2A      | 1029   | NM_058195    | 12496 | -0.62 | -0.28 | -0.63 | 2.42  | 1.38  | -0.90 | -0.91 | -0.40 | 0.20  | -1.53 | 2.91  | -1.11 |
| KMA1542    | 57661  | NM_020901    | 12497 | -0.78 | 0.06  | -0.23 | 0.28  | 0.16  | 0.15  | -0.63 | -0.11 | -0.36 | -0.94 | 0.59  | -1.11 |
| FL1A       | 9412   | NM_0009737   | 12498 | -0.78 | 3.17  | 0.94  | 1.17  | 10.36 | 0.17  | 0.78  | 0.17  | 0.17  | 14.90 | 30.95 | -1.11 |
| LRFS       | 145581 | NM_152447    | 12499 | 0.03  | 0.42  | 0.81  | 1.46  | 1.51  | 2.50  | 0.67  | -0.14 | -0.30 | 1.26  | 4.77  | -1.11 |
| LOC340168  | 340168 | NM_001025290 | 12500 | 0.30  | -0.13 | 0.64  | 2.52  | 0.71  | 1.96  | 0.31  | -0.32 | -0.48 | -0.82 | 5.19  | -1.11 |
| NFSF0      | 8743   | NM_003810    | 12501 | -0.36 | -0.41 | -0.70 | -0.26 | -0.08 | 0.13  | -0.51 | -0.19 | -0.41 | -1.47 | -0.22 | -1.11 |
| 34306      | 34306  | NM_00101830  | 12502 | 0.11  | 0.01  | -0.09 | -0.61 | -0.82 | 0.10  | -0.61 | -0.82 | 0.10  | -0.61 | 1.95  | -1.11 |
| HSPBAP1    | 79663  | NM_024610    | 12503 | -0.96 | 0.00  | 0.12  | 0.19  | 1.27  | -0.07 | -0.84 | -0.71 | 0.44  | -0.84 | 1.39  | -1.11 |
| LOC387638  | 387638 | NM_00101896  | 12504 | -0.64 | 0.57  | -0.68 | 0.37  | -0.07 | -0.10 | 0.75  | -0.12 | -0.24 | 0.75  | 0.21  | -1.11 |
| FLU2184    | 642    | NM_025067    | 12505 | -0.02 | 0.44  | 0.44  | 0.77  | 0.44  | 0.84  | 0.66  | 0.48  | 0.66  | 1.25  | 3.17  | -1.11 |
| CHRM4      | 1132   | NM_000741    | 12506 | 0.03  | -0.29 | 0.43  | 0.62  | 0.22  | 0.40  | -0.49 | -0.47 | -0.16 | 1.16  | 1.24  | -1.11 |
| MFN1       | 55669  | NM_017927    | 12507 | 0.54  | -0.14 | -0.17 | 0.18  | -0.24 | -0.07 | -0.32 | -0.50 | -0.29 | 0.23  | -0.13 | -1.11 |
| KMA0004    | 23130  | NM_001604    | 12508 | -0.30 | 0.59  | -0.15 | -0.11 | -0.66 | -0.15 | -0.11 | -0.66 | -0.15 | -0.11 | 0.16  | -1.11 |
| NAT2       | 10     | NM_000015    | 12509 | 1.07  | 0.94  | 0.67  | 0.56  | 0.67  | 0.31  | -0.90 | -0.74 | 0.53  | -1.33 | 0.92  | -1.11 |
| CABYR      | 26256  | NM_153770    | 12510 | 0.30  | 0.28  | 0.50  | 0.63  | -0.12 | -0.31 | -0.78 | -0.32 | -0.01 | 1.07  | 0.20  | -1.11 |
| INDL       | 12027  | NM_174877    | 12511 | -0.74 | 0.60  | -0.25 | 0.47  | 0.32  | 1.29  | -0.18 | -0.19 | -0.74 | 1.10  | 2.08  | -1.11 |
| TRB3       | 143879 | NM_152433    | 12512 | 0.69  | 1.13  | 1.36  | 1.47  | 1.01  | 0.47  | 1.01  | 0.47  | 1.01  | 1.19  | 3.09  | -1.11 |
| SFR15      | 57466  | NM_020706    | 12513 | -0.84 | -0.89 | -0.35 | -0.14 | -0.39 | 0.05  | -0.62 | -0.58 | 0.09  | -2.08 | -0.48 | -1.11 |
| EXOSC7     | 23016  | NM_015004    | 12514 | -0.98 | -0.84 | -1.33 | -0.80 | -1.13 | -0.77 | -0.45 | -0.04 | -0.62 | -3.35 | -2.70 | -1.11 |
| 703        | 703    | NM_025225    | 12515 | 0.02  | 0.62  | 0.62  | 0.62  | 0.62  | 0.62  | 0.62  | 0.62  | 0.62  | 1.71  | 2.14  | -1.11 |
| NDAI88     | 165721 | NM_153330    | 12516 | 1.21  | 0.33  | -0.11 | 0.65  | 1.30  | 0.83  | 0.03  | -0.55 | -0.60 | 1.42  | 7.78  | -1.11 |
| AMVIC      | 278    | NM_001008219 | 12517 | -0.37 | -0.15 | -0.01 | 0.40  | 0.63  | -0.18 | -0.60 | -0.46 | -0.05 | -0.53 | 0.50  | -1.11 |
| 34458      | 34458  | NM_025077    | 12518 | -0.47 | -0.27 | -0.47 | -0.47 | -0.27 | -0.47 | -0.47 | -0.27 | -0.47 | -0.47 | 0.67  | -1.11 |
| 114034     | 114034 | NM_025077    | 12519 | -0.64 | -0.22 | -0.47 | -0.17 | -0.15 | -0.71 | -0.79 | -0.17 | -0.15 | -1.13 | 1.01  | -1.11 |
| HECTD2     | 143279 | NM_173497    | 12520 | -1.55 | -1.61 | -1.52 | -2.53 | -2.46 | -1.66 | 0.09  | -0.48 | -0.73 | -4.24 | -6.64 | -1.11 |
| LOC12349   | 79879  | NM_024621    | 12521 | -0.40 | -0.77 | -1.07 | -0.03 | -0.27 | -0.79 | -0.28 | -0.47 | -0.37 | -2.44 | -1.09 | -1.11 |
| NPI3       | 4883   | NM_000908    | 12522 | -0.50 | -0.03 | -0.03 | -0.49 | -0.38 | 0.22  | -0.62 | -0.39 | -0.49 | 0.51  | 1.11  | -1.11 |
| DKZF434032 | 54762  | NM_017577    | 12523 | -0.18 | -0.43 | -0.31 | -0.43 | -0.62 | 0.34  | -0.60 | -0.20 | -0.31 | -0.92 | 0.15  | -1.11 |
| 90066      | 90066  | NM_001005163 | 12524 | -0.48 | -0.75 | -1.01 | -0.33 | -0.42 | 0.91  | -0.16 | -0.40 | -0.56 | -2.23 | 1.05  | -1.12 |
| 619        | 619    | NM_001009    | 12525 | 1.04  | 1.55  | 1.26  | 1.54  | 2.42  | 1.64  | 2.42  | 1.64  | 2.42  | 2.82  | 6.03  | -1.12 |
| LAMB3      | 3914   | NM_000228    | 12526 | -1.04 | -0.74 | -0.72 | 0.26  | 0.02  | 1.12  | -0.48 | -0.34 | -0.30 | -2.49 | 1.40  | -1.12 |
| RAB2       | 5862   | NM_002865    | 12527 | 1.00  | 0.00  | -0.10 | 1.18  | 2.17  | 3.00  | -0.09 | -0.72 | -0.31 | 0.91  | 3.66  | -1.12 |
| MBR2L28    | 7987   | NM_024761    | 12528 | -0.58 | -0.63 | -0.61 | -0.11 | -0.66 | -0.41 | -0.11 | -0.66 | -0.41 | -2.01 | -1.81 | -1.12 |
| BID        | 637    | NM_197967    | 12529 | 0.13  | 0.13  | -0.28 | 0.86  | 0.69  | 1.07  | -0.23 | -0.30 | -0.59 | -2.02 | 1.62  | -1.12 |
| ZNF248     | 57209  | NM_021045    | 12530 | -0.43 | -0.41 | 0.21  | 0.28  | 0.29  | 0.20  | -0.45 | -0.53 | -0.14 | -0.62 | 0.78  | -1.12 |
| LP2        | 3937   | NM_005565    | 12531 | -0.21 | -0.25 | 0.88  | 1.92  | 2.24  | 1.12  | -0.82 | -0.85 | 0.55  | 0.84  | 5.27  | -1.12 |
| TNRC18L    | 8162   | NM_030969    | 12532 | 1.47  | 0.94  | 0.83  | 2.17  | 2.44  | 1.61  | 2.44  | 1.61  | 2.44  | 4.44  | 8.87  | -1.12 |
| UBE1C      | 9039   | NM_198197    | 12533 | 0.02  | -0.73 | 0.10  | 0.77  | 0.15  | 0.92  | -0.16 | -0.61 | -0.35 | -0.61 | 1.84  | -1.12 |
| DKX38      | 9795   | NM_014003    | 12534 | -0.91 | -0.76 | -1.15 | -0.02 | -0.49 | 0.52  | -0.07 | -0.14 | -0.91 | -2.82 | 1.00  | -1.12 |
| CS2        | 147    | NM_0010091   | 12535 | -0.20 | 0.63  | 0.63  | 0.44  | 0.17  | 0.44  | -0.17 | -0.44 | -0.17 | -0.52 | 0.97  | -1.12 |
| GALP       | 85569  | NM_033106    | 12536 | -0.34 | 0.20  | -0.38 | 1.16  | 1.82  | 0.03  | -0.66 | 0.05  | -0.51 | -0.53 | 2.95  | -1.12 |
| JRP1       | 4035   | NM_002332    | 12537 | 1.21  | 0.16  | 0.43  | 1.52  | 1.70  | 0.75  | -0.28 | -0.68 | -0.16 | 1.80  | 3.97  | -1.12 |
| ITAD       | 9742   | NM_015774    | 12538 | -0.43 | -0.15 | -0.20 | -0.58 | -0.20 | -0.43 | -0.58 | -0.20 | -0.43 | -0.78 | -1.69 | -1.12 |
| ZNF547     | 284306 | NM_173631    | 12539 | 1.18  | 0.74  | -0.08 | 0.16  | 0.26  | 0.31  | -0.21 | -0.86 | -0.05 | 1.00  | 0.72  | -1.12 |
| TSPAN14    | 81619  | NM_01128309  | 12540 | -0.62 | -0.91 | -0.67 | 0.70  | -0.13 | -0.52 | -0.58 | -0.49 | -0.06 | -2.20 | 0.05  | -1.12 |
| RAB8B      | 51762  | NM_016330    | 12541 | -0.05 | -0.31 | -0.27 | 0.98  | 0.77  | 0.49  | -0.44 | -0.08 | -0.60 | -0.63 | 2.24  | -1.12 |
| TRPC2      | 2307   | NM_010077    | 12542 | 0.32  | 0.04  | -0.19 | 0.42  | 0.69  | 0.78  | 0.12  | -0.69 | 0.12  | 0.77  | 3.77  | -1.12 |
| NF07       | 22847  | NM_014910    | 12543 | -0.29 | -0.54 | -0.46 | -0.35 | -1.15 | -0.37 | -0.64 | -0.22 | -0.27 | -1.28 | -1.87 | -1.12 |
| SMI3       | 33929  | NM_178310    | 12544 | -0.77 | -0.59 | -0.52 | -0.70 | -0.09 | -0.51 | -0.49 | -0.52 | -0.12 | -3.89 | -3.11 | -1.12 |
| AI1668     | 8068   | NM_016822    | 12545 | 0.25  | 0.65  | 0.17  | 0.66  | 0.12  | 0.68  | 0.12  | 0.68  | 0.12  | 0.47  | 1.01  | -1.12 |
| NAGLU      | 4669   | NM_000263    | 12546 | -0.76 | -0.54 | -0.52 | -0.18 | -0.43 | -0.01 | -0.66 | -0.06 | -0.40 | -1.81 | -     |       |

|           |        |              |       |       |       |       |       |       |       |       |       |       |       |       |       |
|-----------|--------|--------------|-------|-------|-------|-------|-------|-------|-------|-------|-------|-------|-------|-------|-------|
| INSL5     | 10022  | NM_005478    | 12629 | 0.66  | 0.17  | -0.49 | 0.64  | 1.05  | 1.68  | 0.22  | -0.48 | -0.90 | 0.34  | 3.37  | -1.15 |
| BR01      | 1812   | NM_001774    | 12630 | -0.40 | 0.45  | 0.21  | -0.56 | 0.70  | 0.41  | -0.39 | 0.49  | -0.21 | -0.45 | 0.36  | -1.33 |
| RNF43     | 54894  | NM_017763    | 12631 | 7.97  | 13.58 | 6.22  | 8.61  | 13.37 | 14.95 | -0.07 | -0.37 | -0.71 | 27.77 | 36.94 | -1.15 |
| ARHGFB7   | 8874   | NM_003899    | 12632 | 0.21  | -0.29 | -0.30 | 0.64  | 2.96  | 1.54  | -0.04 | -0.53 | -0.58 | -0.37 | 5.14  | -1.15 |
| KCNAB3    | 9196   | NM_004732    | 12633 | 0.52  | -0.88 | -0.41 | -0.56 | -0.26 | -0.09 | -0.27 | -0.44 | -0.44 | -1.61 | -0.90 | -1.15 |
| ITGIC     | 8465   | NM_001221    | 12634 | 0.51  | 0.68  | 0.11  | -0.54 | 0.78  | 0.21  | -0.38 | -0.06 | -1.47 | -0.23 | 2.08  | -1.15 |
| JMY       | 133746 | NM_152405    | 12635 | -0.50 | -0.05 | -0.61 | 0.38  | -0.01 | 0.30  | -0.14 | 0.33  | -0.68 | -0.16 | 0.67  | -1.15 |
| LOC390999 | 990999 | NM_00100830  | 12636 | -0.55 | -0.40 | -0.66 | 1.16  | 0.91  | 0.01  | -0.73 | -0.30 | -0.12 | -1.61 | 2.06  | -1.15 |
| HRBP2     | 5591   | NM_000560    | 12637 | 0.64  | 0.49  | 0.48  | 0.54  | 0.49  | 0.48  | -0.58 | 0.24  | 0.11  | -1.00 | 0.31  | -1.16 |
| IGF1      | 3479   | NM_000618    | 12638 | -0.74 | -0.01 | -0.09 | 1.08  | 0.44  | -0.20 | -0.88 | -0.38 | 0.11  | -0.84 | 1.32  | -1.16 |
| C10R131   | 280636 | NM_170746    | 12639 | 0.07  | -0.49 | -0.78 | 0.49  | 0.13  | 0.11  | 0.00  | -0.49 | -0.67 | -1.19 | 0.74  | -1.16 |
| SPN2      | 2712   | NM_153836    | 12640 | 1.22  | 1.26  | 0.35  | 0.20  | 1.16  | 1.76  | -1.86 | 1.76  | -0.61 | -2.83 | 4.82  | -1.16 |
| SLCB2     | 16441  | NM_003054    | 12641 | -0.54 | 0.38  | -0.52 | -0.07 | 0.18  | 0.10  | 0.53  | -0.51 | -0.12 | -1.44 | 0.29  | -1.16 |
| C10R1F10  | 746    | NM_014206    | 12642 | -0.28 | -0.28 | -0.50 | 0.65  | 0.24  | 0.64  | -0.64 | -0.44 | -0.52 | -0.78 | 0.90  | -1.16 |
| MAL2      | 4150   | NM_002383    | 12643 | -0.23 | -0.31 | -0.28 | 0.27  | 0.53  | 0.15  | -0.47 | -0.42 | -0.27 | -0.82 | 0.95  | -1.16 |
| WDR31     | 114987 | NM_00100615  | 12644 | -0.06 | 0.16  | -1.54 | -0.51 | -0.57 | 0.36  | -0.06 | 0.13  | -1.21 | -1.76 | 0.72  | -1.16 |
| UXT       | 8409   | NM_004182    | 12645 | -0.96 | 0.35  | -1.00 | -1.12 | 0.02  | -0.83 | -0.73 | 0.29  | -0.72 | -1.61 | -0.94 | -1.16 |
| SCRN1     | 9805   | NM_014766    | 12646 | 1.82  | 0.10  | 0.64  | -1.67 | 2.17  | 1.76  | -0.01 | -0.74 | 0.40  | 2.57  | 5.60  | -1.16 |
| FLJ22191  | 147922 | NM_144689    | 12647 | 0.26  | 0.24  | -0.10 | 1.12  | 0.90  | 1.09  | -0.19 | -0.20 | -0.07 | 0.02  | 0.11  | -1.16 |
| NCOA6P    | 96764  | NM_024831    | 12648 | 0.53  | 0.52  | -0.38 | 0.73  | 0.75  | 0.47  | -0.18 | -0.28 | -0.70 | 0.66  | 1.95  | -1.16 |
| TPST15    | 85453  | NM_033512    | 12649 | -0.36 | -0.92 | -0.12 | -0.24 | -0.43 | -0.24 | -0.36 | -0.82 | 0.03  | -1.40 | -0.92 | -1.16 |
| LOC92346  | 92346  | NM_139240    | 12650 | -0.29 | -0.46 | -0.59 | 0.56  | 0.14  | -0.30 | -0.52 | -0.26 | -0.38 | -1.34 | 0.40  | -1.16 |
| DRP2      | 1821   | NM_001939    | 12651 | -0.17 | -0.68 | -0.85 | 0.21  | -0.39 | 0.51  | 0.05  | -0.35 | -0.86 | -1.70 | 0.33  | -1.16 |
| TMEM47    | 83604  | NM_031442    | 12652 | -0.10 | -0.23 | -0.20 | 0.76  | 0.02  | -0.01 | -0.59 | -0.39 | -0.18 | -0.54 | 0.77  | -1.16 |
| SLC12A3   | 6559   | NM_000339    | 12653 | 0.63  | -0.61 | -0.34 | -0.05 | 0.05  | 0.49  | 0.06  | -0.67 | -0.55 | -0.31 | 0.46  | -1.16 |
| SP2       | 6388   | NM_000603    | 12654 | -0.70 | -0.29 | -0.33 | -0.62 | -1.06 | -0.35 | 0.80  | 0.22  | -0.58 | -1.32 | -0.02 | -1.16 |
| SOX       | 60592  | NM_032547    | 12655 | -0.38 | -0.29 | -0.34 | -0.40 | 0.77  | -0.09 | -0.21 | -0.63 | -0.32 | -1.01 | 0.27  | -1.16 |
| TPM1      | 7168   | NM_001018005 | 12656 | 0.33  | 0.81  | 0.62  | 1.62  | 1.41  | 2.19  | -0.45 | -0.13 | -0.59 | 1.76  | 5.22  | -1.16 |
| 25L2      | 2528   | NM_0012473   | 12657 | 0.89  | 0.20  | -0.78 | -0.20 | -0.56 | 0.40  | -0.42 | -0.30 | -0.78 | -1.81 | 1.95  | -1.16 |
| BMX       | 6600   | NM_001721    | 12658 | -0.35 | -0.33 | -0.72 | -0.28 | -0.03 | -0.54 | -0.33 | -0.33 | -0.50 | -1.40 | -0.84 | -1.16 |
| LOC93109  | 93109  | NM_001018005 | 12659 | -0.92 | -0.25 | -0.76 | -0.50 | -0.70 | 0.03  | -0.45 | -0.21 | -0.51 | -1.93 | -1.17 | -1.16 |
| FLJ108629 | 55377  | NM_001820    | 12660 | 0.24  | 0.07  | -0.26 | 0.60  | 0.07  | -0.26 | 0.05  | -0.36 | -0.25 | 0.00  | 0.82  | -1.16 |
| PRDM11    | 56981  | NM_020229    | 12661 | 0.78  | 0.65  | -0.31 | 0.82  | 0.18  | -0.11 | -0.05 | -0.82 | -0.30 | -0.19 | 0.88  | -1.16 |
| KIAA1404  | 57169  | NM_021035    | 12662 | -0.61 | -0.62 | -0.54 | -0.69 | -0.49 | -0.39 | -0.06 | -0.79 | -0.31 | -1.78 | -0.59 | -1.16 |
| KCNV1     | 3745   | NM_004975    | 12663 | -1.03 | -0.05 | -0.98 | -0.02 | 0.55  | 0.07  | -0.67 | -0.19 | -0.30 | -1.88 | 0.60  | -1.16 |
| CAMKCG    | 618    | NM_001022    | 12664 | -0.31 | 0.48  | -0.57 | 0.40  | -0.58 | -0.40 | -0.40 | -0.40 | -0.40 | -1.36 | 0.31  | -1.16 |
| CCDC12    | 72842  | NM_033529    | 12665 | -0.90 | -0.84 | -1.16 | -0.67 | -0.93 | -1.17 | -0.32 | -0.43 | -0.41 | -2.90 | -2.77 | -1.16 |
| TPR1      | 3708   | NM_002022    | 12666 | 0.04  | 0.29  | 0.17  | 1.50  | -0.02 | 0.45  | -0.65 | -0.04 | -0.48 | 0.42  | 1.94  | -1.16 |
| HTL1      | 5149   | NM_001876    | 12667 | -0.92 | 0.74  | -0.57 | 0.14  | -0.19 | -0.74 | -0.21 | -0.67 | -0.19 | -0.03 | 1.48  | -1.16 |
| OR7D4     | 125958 | NM_001005191 | 12668 | -0.28 | -0.36 | -0.39 | 0.39  | 0.15  | 0.48  | -0.63 | -0.27 | -0.26 | -1.02 | 0.72  | -1.17 |
| TFE       | 7075   | NM_005424    | 12669 | -0.91 | -0.15 | -0.64 | 0.43  | 0.46  | 0.51  | -0.48 | -0.37 | -0.32 | -1.69 | 1.41  | -1.17 |
| PHM       | 28498  | NM_00127817  | 12670 | -0.73 | 0.01  | -0.31 | 0.36  | 0.05  | -0.65 | -0.17 | -0.30 | -0.57 | -0.41 | 0.50  | -1.17 |
| SH3GL3    | 6457   | NM_003027    | 12671 | 0.36  | 0.83  | -0.27 | 1.47  | 0.45  | 0.36  | -0.15 | -0.50 | -0.52 | -1.46 | 1.28  | -1.17 |
| C10R1F54  | 79630  | NM_024579    | 12672 | -0.96 | -0.47 | -0.99 | -0.19 | -0.46 | 0.30  | -0.22 | -0.68 | -0.87 | -2.42 | -0.34 | -1.17 |
| SPAG11A   | 63243  | NM_001018005 | 12673 | 0.24  | -0.62 | 0.35  | 2.21  | -0.52 | 0.39  | -0.73 | -0.40 | -0.03 | -0.03 | 2.04  | -1.17 |
| 1012      | 1012   | NM_133259    | 12674 | 0.42  | 0.12  | -0.51 | 0.18  | 0.10  | 0.10  | -0.58 | -0.42 | -0.19 | -0.53 | 1.07  | -1.17 |
| DCNP1     | 140947 | NM_130848    | 12675 | -0.27 | -0.30 | -1.17 | 0.20  | 0.17  | -0.10 | -0.18 | -0.21 | -0.78 | -1.74 | 0.27  | -1.17 |
| AMXR1     | 84168  | NM_053934    | 12676 | -0.16 | -0.81 | 0.06  | 0.15  | 0.48  | 0.64  | -0.37 | -0.74 | -0.05 | -0.91 | 1.27  | -1.17 |
| ITG71     | 2867   | NM_001518    | 12677 | 0.43  | 0.10  | -0.27 | 0.78  | 0.26  | 0.19  | -0.46 | -0.26 | -0.16 | -0.26 | 1.73  | -1.17 |
| CZSNT3    | 51301  | NM_016591    | 12678 | -0.08 | 0.49  | -0.14 | 0.45  | 1.04  | 0.38  | -0.48 | -0.25 | -0.44 | 0.28  | 1.87  | -1.17 |
| FLJ37970  | 282324 | NM_032251    | 12679 | -0.93 | -0.96 | -0.91 | -0.36 | -0.70 | 0.08  | -0.40 | -0.60 | -0.56 | -2.81 | -1.00 | -1.17 |
| SHARCA1   | 6588   | NM_0010074   | 12680 | -0.08 | -0.51 | -0.89 | -0.17 | -0.88 | -0.17 | -0.57 | -0.88 | -1.41 | -2.48 | -1.49 | -1.17 |
| HORMAD1   | 84072  | NM_032132    | 12681 | 0.27  | 0.57  | 0.52  | 1.35  | 0.50  | 0.46  | -0.73 | -0.58 | 0.14  | 0.23  | 2.31  | -1.17 |
| FLJ35996  | 388341 | NM_003787    | 12682 | 0.34  | -0.71 | -0.50 | 0.09  | 0.68  | 0.89  | 0.07  | -0.81 | -0.43 | -0.87 | 1.66  | -1.17 |
| TMS       | 8658   | NM_001740    | 12683 | 0.40  | -0.45 | -0.77 | 0.66  | 0.56  | 0.77  | -0.29 | -0.76 | -1.13 | 0.73  | 2.00  | -1.17 |
| LOC112073 | 13207  | NM_145033    | 12684 | -0.17 | 0.21  | -0.50 | 1.34  | -0.47 | -0.39 | -0.42 | -0.73 | -0.60 | -0.53 | 3.25  | -1.17 |
| FLJ10324  | 55698  | NM_018059    | 12685 | -1.16 | 0.39  | 0.58  | 2.59  | 1.36  | 0.87  | -1.22 | -0.09 | 0.14  | -0.20 | 4.82  | -1.17 |
| CHR64     | 11408  | NM_001122716 | 12686 | -0.23 | -0.99 | -0.55 | 0.02  | -0.56 | -0.45 | -0.28 | -0.68 | -0.22 | -1.77 | -0.98 | -1.17 |
| TPR2      | 38712  | NM_199047    | 12687 | -0.43 | 0.88  | -0.73 | 0.55  | 0.73  | 0.28  | -0.55 | -0.13 | -0.55 | -2.03 | 0.05  | -1.17 |
| BC1210    | 10017  | NM_002096    | 12688 | 0.46  | 0.25  | 0.14  | 1.07  | 1.29  | 0.46  | -0.40 | -0.57 | -0.20 | 0.84  | 2.82  | -1.17 |
| CTSL      | 1522   | NM_001336    | 12689 | -0.75 | -1.39 | -1.50 | -0.80 | -0.75 | -0.45 | 0.69  | -0.71 | -1.16 | -3.64 | -2.00 | -1.17 |
| IGF       | 7850   | NM_001221    | 12690 | -0.77 | -0.49 | -0.87 | 0.48  | 1.59  | 0.89  | -0.12 | -0.53 | -0.51 | -2.14 | 2.86  | -1.17 |
| TPK1      | 27010  | NM_022445    | 12691 | -0.11 | -0.59 | -0.66 | 0.43  | -0.03 | 0.83  | -0.42 | -0.08 | -0.68 | -1.36 | 1.24  | -1.18 |
| MGC13170  | 84798  | NM_199250    | 12692 | -0.39 | -0.53 | -0.28 | 0.44  | 0.50  | 0.32  | -0.36 | -0.42 | -0.39 | -1.20 | 1.26  | -1.18 |
| TNFR1     | 84062  | NM_032122    | 12693 | -0.23 | -0.97 | -0.42 | -0.36 | -0.47 | -0.34 | -0.05 | -0.62 | -0.61 | -1.62 | -0.97 | -1.18 |
| MGC12     | 3238   | NM_178960    | 12694 | 0.66  | 0.97  | 0.07  | 0.85  | 0.21  | -1.08 | -0.21 | -0.65 | -0.71 | -0.80 | 2.74  | -1.18 |
| MARK3     | 4140   | NM_002376    | 12695 | 0.86  | 1.25  | 0.75  | 3.57  | 2.35  | 2.39  | -0.57 | -0.11 | -0.50 | 2.86  | 8.32  | -1.18 |
| FANCF     | 2188   | NM_022725    | 12696 | -0.06 | 0.30  | -0.42 | 0.22  | 0.30  | 0.17  | -0.51 | -1.18 | -0.48 | -0.38 | 0.69  | -1.18 |
| SH3GAP5   | 395    | NM_001422    | 12697 | 0.30  | -0.87 | -0.20 | 0.30  | -0.29 | -0.20 | -0.30 | -0.20 | -0.20 | -1.77 | -0.50 | -1.18 |
| FLJ20457  | 54942  | NM_017832    | 12698 | 0.31  | 0.56  | -0.18 | 0.63  | 1.07  | 0.95  | -0.24 | -0.22 | -0.72 | -0.69 | 2.65  | -1.18 |
| GRAM      | 57678  | NM_020918    | 12699 | 0.24  | 2.51  | 1.27  | 3.22  | 3.51  | 1.41  | -0.76 | -0.11 | -0.31 | -0.41 | 8.15  | -1.18 |
| AGE1      | 17827  | NM_0013775   | 12700 | -0.47 | -0.63 | -0.37 | 0.70  | -0.73 | -0.20 | -0.43 | -0.43 | -0.43 | -0.84 | 0.15  | -1.18 |
| MGC14156  | 84992  | NM_022906    | 12701 | 0.47  | 0.78  | -0.86 | 0.93  | 0.47  | 0.05  | 0.67  | 0.28  | 0.79  | 2.05  | 3.46  | -1.18 |
| ORS266    | 390078 | NM_001005167 | 12702 | -0.53 | -0.36 | -0.10 | -0.07 | 0.05  | -0.28 | -0.70 | -0.58 | 0.10  | -0.99 | -0.30 | -1.18 |
| HEP1      | 50865  | NM_015987    | 12703 | 0.93  | -0.27 | 0.23  | 0.66  | 1.18  | 1.60  | 0.25  | -0.81 | -0.61 | -0.88 | 3.18  | -1.18 |
| MS408     | 25798  | NM_134434    | 12704 | 0.09  | 0.45  | 0.37  | 0.43  | 0.43  | 0.73  | -0.40 | -0.63 | -0.43 | -1.11 | 1.58  | -1.18 |
| HRG       | 3273   | NM_000412    | 12705 | 2.02  | -0.74 | -0.52 | 2.54  | 3.33  | 1.79  | 0.84  | -1.18 | -0.84 | 0.76  | 3.66  | -1.18 |
| HS        | 3562   | NM_000588    | 12706 | -0.73 | 0.60  | 0.20  | 1.03  | 0.13  | 0.16  | -0.88 | -0.22 | -0.06 | 0.07  | 1.32  | -1.18 |
| ITGIC     | 1432   | NM_000989    | 12707 | -0.89 | 1.09  | -1.06 | 0.72  | 1.80  | 0.52  | -0.13 | -0.20 | -0.40 | -0.86 | 0.57  | -1.18 |
| LOC151871 | 151871 | NM_138815    | 12708 | -0.52 | 0.21  | -0.50 | 0.54  | 0.51  | -0.71 | -0.59 | -0.   |       |       |       |       |

|             |        |              |       |       |       |       |       |       |       |       |       |       |       |       |       |
|-------------|--------|--------------|-------|-------|-------|-------|-------|-------|-------|-------|-------|-------|-------|-------|-------|
| MAL110      | 8028   | NM_001009569 | 12791 | 4.72  | 10.90 | 9.62  | 17.15 | 8.98  | 9.58  | -0.67 | -0.38 | -0.16 | 25.24 | 35.71 | -1.21 |
| TEXT3       | 6458   | NM_001009569 | 12792 | 1.25  | 0.26  | -0.20 | 1.21  | 1.22  | 0.89  | -0.75 | -0.88 | -0.10 | -0.10 | 4.14  | -1.21 |
| SULTA1      | 25830  | NM_014351    | 12793 | 0.31  | -0.50 | -0.54 | -0.18 | -0.09 | -0.13 | 0.51  | 0.07  | -0.77 | 1.86  | 0.41  | -1.21 |
| CHRNA10     | 57053  | NM_020402    | 12794 | -0.19 | -0.13 | -0.21 | 0.23  | 0.32  | 1.01  | -0.06 | -0.48 | -0.67 | 0.05  | 1.57  | -1.21 |
| RIF2        | 55582  | NM_017576    | 12795 | -0.04 | 0.62  | 0.61  | 0.89  | 0.71  | 2.21  | -0.49 | -0.05 | -0.67 | 1.19  | 5.81  | -1.21 |
| FLI0832     | 55586  | NM_020406    | 12796 | 0.53  | 0.84  | 0.07  | 0.42  | 0.00  | 0.00  | 0.52  | 0.55  | 0.42  | 0.29  | 0.53  | -1.21 |
| RP11-186014 | 643414 | NM_926746    | 12797 | -0.67 | -0.16 | 0.14  | 1.35  | 0.95  | 0.89  | -0.27 | -0.64 | -0.30 | 0.64  | 3.19  | -1.21 |
| LOC57228    | 57228  | NM_020467    | 12798 | -0.72 | 0.68  | 0.02  | 1.65  | 2.54  | 2.94  | -0.99 | 0.38  | -0.60 | -0.02 | 7.13  | -1.21 |
| HCC5        | 305    | NM_005333    | 12799 | 0.24  | 0.11  | 0.30  | 0.11  | 0.40  | 0.88  | -0.57 | -0.48 | 0.43  | 1.64  | 1.21  | -1.21 |
| VBP1        | 7411   | NM_003372    | 12800 | -0.53 | 0.93  | 0.78  | 0.22  | 0.08  | 0.44  | -0.73 | -0.37 | -0.12 | 1.18  | 0.73  | -1.21 |
| TRM32       | 22954  | NM_012120    | 12801 | 1.36  | 1.04  | 3.00  | 4.41  | 3.58  | 3.98  | -0.52 | -0.58 | -0.11 | 6.30  | 11.97 | -1.21 |
| ENP         | 5589   | NM_016555    | 12802 | 0.30  | -0.71 | -0.65 | -0.73 | -0.68 | -0.73 | -0.49 | -0.73 | -0.73 | -1.77 | -1.37 | -1.21 |
| ACP3        | 390    | NM_004925    | 12803 | 1.22  | 0.89  | -0.51 | -1.57 | -1.41 | 1.38  | -0.09 | -0.22 | -0.90 | 0.63  | 1.59  | -1.21 |
| LOC126147   | 126147 | NM_145807    | 12804 | -0.19 | -0.13 | 0.09  | 1.28  | 3.28  | 1.84  | 0.01  | -0.58 | -0.64 | 0.15  | 6.40  | -1.22 |
| ATP5G2      | 517    | NM_005176    | 12805 | -0.92 | -0.31 | -0.71 | 2.81  | 1.52  | 1.01  | -1.09 | 0.70  | -0.83 | -1.94 | 5.34  | -1.22 |
| OSV1        | 39001  | NM_00005324  | 12806 | -0.29 | -0.31 | 0.76  | -0.81 | -0.38 | 0.68  | -0.30 | -0.27 | -0.54 | -1.39 | 1.87  | -1.22 |
| MM67        | 4288   | NM_002417    | 12807 | 0.02  | 0.40  | -0.21 | 1.61  | 1.44  | 0.81  | -0.62 | -0.08 | -0.52 | 0.21  | 3.85  | -1.22 |
| ZNF625      | 90589  | NM_145233    | 12808 | -0.47 | -0.21 | 0.68  | 0.37  | -0.23 | 2.37  | -0.08 | -0.61 | -0.53 | 0.95  | 2.52  | -1.22 |
| LOC129551   | 129551 | NM_138798    | 12809 | -0.91 | 0.51  | -0.52 | 0.41  | -0.06 | 0.94  | -0.83 | -0.41 | 0.03  | 1.74  | 1.20  | -1.22 |
| TNRC9       | 27324  | NM_941030    | 12810 | -0.18 | -0.40 | -0.05 | 0.27  | 0.15  | 1.55  | -0.49 | -0.58 | -0.15 | -0.63 | 1.97  | -1.22 |
| ZNF4143     | 22806  | NM_183231    | 12811 | -0.59 | -0.62 | -0.18 | 1.12  | 0.43  | 0.32  | -0.69 | -0.66 | 0.13  | -1.39 | 1.86  | -1.22 |
| MGC13424    | 143888 | NM_153705    | 12812 | -1.51 | -0.90 | -1.34 | -1.22 | -1.54 | -1.14 | -0.72 | -0.17 | -0.33 | -3.75 | -4.08 | -1.22 |
| LOC90485    | 90485  | NM_001005050 | 12813 | 0.15  | -0.39 | -0.37 | 0.22  | 0.80  | 0.67  | -0.08 | -0.58 | -0.57 | 0.93  | 1.69  | -1.22 |
| VPS13A      | 23230  | NM_015186    | 12814 | -0.13 | -0.07 | -0.58 | -0.11 | 0.23  | -0.22 | -0.24 | -0.58 | -0.39 | -0.77 | -0.11 | -1.22 |
| LOC72       | 10540  | NM_006400    | 12815 | 0.82  | -0.33 | 1.06  | 0.44  | 1.77  | 1.63  | -0.39 | -0.68 | -0.15 | 1.55  | 3.83  | -1.22 |
| TOP2A       | 7155   | NM_004618    | 12816 | -0.26 | -0.32 | -0.56 | -0.40 | -0.01 | -0.18 | 0.17  | -0.52 | -0.53 | -1.09 | -0.59 | -1.22 |
| ZNF626      | 199777 | NM_145297    | 12817 | 0.08  | -0.25 | 0.31  | 0.97  | -0.06 | 1.18  | -0.65 | -0.34 | -0.23 | 0.15  | 2.09  | -1.22 |
| LOC440087   | 440087 | NM_00101698  | 12818 | -0.27 | -0.61 | -0.63 | -0.41 | -0.52 | 0.23  | -0.34 | -0.16 | -0.72 | -0.50 | -0.70 | -1.22 |
| LOC100455   | 8364   | NM_00101698  | 12819 | -0.65 | -0.03 | -1.07 | 0.22  | 0.14  | 0.32  | -0.37 | -0.62 | -0.10 | 0.40  | 0.25  | -1.22 |
| KNA6        | 3742   | NM_002235    | 12820 | 0.00  | 0.06  | -0.29 | 0.51  | 0.85  | 0.63  | -0.21 | -0.51 | -0.51 | -1.23 | 1.98  | -1.22 |
| PTRPD       | 5789   | NM_130393    | 12821 | -0.46 | -0.41 | -0.47 | 0.59  | 0.43  | -0.38 | -0.64 | -0.50 | -0.08 | -1.33 | 0.66  | -1.22 |
| HL1         | 227    | NM_00101489  | 12822 | -0.39 | -0.97 | -0.62 | -0.42 | -0.60 | -0.49 | -0.48 | -0.29 | -0.42 | -0.77 | -0.58 | -1.22 |
| SK2         | 23235  | NM_015191    | 12823 | 0.06  | 0.27  | 0.06  | 0.62  | 0.48  | 1.06  | -0.52 | -0.29 | -0.43 | 0.27  | 2.16  | -1.22 |
| HSPG2       | 3339   | NM_005529    | 12824 | -0.81 | -0.49 | -0.90 | -0.99 | -0.79 | -0.75 | -0.61 | -0.20 | -0.41 | -2.19 | -2.53 | -1.22 |
| HST14AC     | 8364   | NM_003542    | 12825 | -0.45 | -0.24 | -0.46 | 0.58  | -0.09 | -0.30 | -0.81 | -0.14 | -0.27 | -1.09 | 0.19  | -1.22 |
| HL1         | 5735   | NM_000533    | 12826 | -0.26 | 0.64  | 0.35  | 0.69  | 0.43  | 0.69  | -0.43 | -0.28 | -0.61 | 0.98  | 1.40  | -1.22 |
| TBX21       | 30009  | NM_013351    | 12827 | -0.26 | 0.05  | 0.01  | 1.19  | 0.64  | 0.64  | -0.74 | -0.25 | -0.23 | -2.00 | 2.47  | -1.22 |
| C14ORF8     | 122664 | NM_173846    | 12828 | -0.36 | 0.00  | -0.17 | 0.36  | 0.86  | 0.90  | -0.50 | -0.16 | -0.56 | -0.53 | 2.13  | -1.22 |
| FKB         | 5416   | NM_0010237   | 12829 | 1.12  | 1.34  | 1.64  | 1.43  | 2.16  | 1.56  | -0.43 | -0.24 | -0.56 | 0.42  | 5.48  | -1.22 |
| LOC38072    | 38072  | NM_001008045 | 12830 | -0.69 | -0.43 | 0.21  | 0.28  | 0.66  | -0.09 | -0.73 | -0.55 | 0.06  | -0.91 | 0.85  | -1.22 |
| OTOG        | 340906 | NM_291816    | 12831 | -0.68 | -0.46 | -0.29 | -0.31 | -0.33 | -0.26 | -0.68 | -0.41 | -0.14 | -1.44 | -0.91 | -1.22 |
| TNFRSF57    | 34485  | NM_003059    | 12832 | -0.65 | -0.29 | -0.49 | -0.42 | -0.23 | -0.39 | -0.43 | -0.48 | -0.73 | -0.78 | -1.58 | -1.22 |
| PPP         | 5473   | NM_002704    | 12833 | -0.74 | -0.24 | -1.07 | -0.36 | 0.18  | 0.08  | -0.74 | -0.49 | -0.98 | -2.05 | -0.10 | -1.22 |
| FLJ3058     | 158763 | NM_144967    | 12834 | -0.61 | -1.22 | -1.08 | -1.30 | -0.78 | -0.62 | 0.38  | -0.89 | -0.71 | -2.91 | -2.71 | -1.22 |
| UMOD3       | 56203  | NM_198771    | 12835 | -0.63 | -0.29 | 0.12  | -0.09 | -0.42 | -0.19 | -0.48 | -0.56 | -0.19 | -0.80 | 0.14  | -1.22 |
| ENY1        | 10778  | NM_006433    | 12836 | -1.02 | -0.48 | -1.22 | -0.67 | -0.67 | -0.67 | -0.67 | -0.67 | -0.67 | -0.67 | 0.31  | -1.22 |
| TCHH1       | 126637 | NM_001008536 | 12837 | -0.83 | -0.31 | -0.79 | -0.31 | -0.15 | 0.33  | -0.51 | -0.06 | -0.66 | -1.93 | -0.13 | -1.22 |
| RFTL        | 499996 | NM_001010987 | 12838 | -0.27 | -0.98 | -0.69 | -0.63 | -0.97 | -0.22 | -0.08 | -0.60 | -0.54 | -1.99 | -1.82 | -1.22 |
| SERP2       | 587    | NM_018663    | 12839 | -0.27 | 0.02  | -0.18 | 0.57  | 0.57  | 0.57  | -0.57 | -0.57 | -0.57 | -0.57 | 0.57  | -1.22 |
| SALL2       | 6297   | NM_005407    | 12840 | -0.61 | -0.25 | -0.88 | -0.17 | -0.54 | -0.14 | -0.65 | -0.17 | -0.75 | -1.74 | -0.85 | -1.22 |
| KIF26A      | 26153  | NM_050278    | 12841 | -0.36 | 0.08  | -0.88 | -0.17 | 0.42  | -0.31 | -0.35 | -0.15 | -0.73 | -1.16 | -0.06 | -1.22 |
| SIX3        | 880    | NM_00100849  | 12842 | -0.29 | -0.88 | -1.17 | -0.32 | -0.63 | -0.63 | -0.63 | -0.63 | -0.63 | -0.63 | -0.63 | -1.22 |
| ATP8B4      | 79895  | NM_024837    | 12843 | -0.12 | -0.23 | -1.07 | 1.02  | 0.00  | 0.58  | 0.43  | 0.04  | -0.84 | -1.42 | 1.60  | -1.22 |
| NP007       | 57414  | NM_001040456 | 12844 | -0.23 | -0.44 | 0.16  | 0.00  | 0.71  | 1.22  | -0.27 | -0.89 | -0.07 | -0.52 | 1.94  | -1.22 |
| DNAH1       | 1728   | NM_005219    | 12845 | -0.68 | 0.04  | 0.49  | 0.57  | 0.58  | 0.41  | -0.76 | -0.29 | -0.18 | -0.15 | 1.56  | -1.22 |
| GOR8        | 12202  | NM_130806    | 12846 | 0.45  | 0.30  | 0.23  | 0.68  | 0.32  | 0.52  | 0.12  | -0.32 | -0.10 | 0.21  | 2.21  | -1.22 |
| FLJ22709    | 79629  | NM_024578    | 12847 | 0.50  | -0.57 | -0.05 | 0.10  | 0.02  | 1.92  | 0.09  | -0.66 | -0.66 | -0.10 | 2.05  | -1.22 |
| ROR2        | 28348  | NM_173846    | 12848 | -0.91 | -1.09 | -1.10 | -1.70 | -0.89 | -0.77 | -0.62 | -0.22 | -0.39 | -1.20 | -3.22 | -1.22 |
| LOC285382   | 285382 | NM_001025266 | 12849 | 0.96  | 0.12  | 0.24  | 0.81  | 0.47  | 0.81  | -0.47 | -0.12 | -0.41 | -1.32 | 0.49  | -1.22 |
| CC14L8      | 8555   | NM_003671    | 12850 | -0.50 | -0.65 | -0.84 | 0.68  | 0.50  | 0.86  | -0.64 | -0.12 | -0.71 | -2.00 | 2.04  | -1.22 |
| RP143B      | 9501   | NM_006987    | 12851 | 0.55  | -0.05 | -0.14 | 0.08  | 0.74  | 0.63  | 0.03  | -0.64 | -0.62 | 0.37  | 1.44  | -1.22 |
| ST5         | 10238  | NM_00100819  | 12852 | 0.07  | 0.32  | -0.28 | 0.35  | 1.89  | 0.89  | -0.41 | -0.28 | -0.51 | -1.23 | 2.69  | -1.22 |
| CCBP2       | 1238   | NM_001296    | 12853 | 0.17  | -0.10 | 0.78  | 0.63  | -0.06 | 0.64  | -0.67 | -0.34 | -0.23 | 0.51  | 1.21  | -1.22 |
| CEMP1       | 752014 | NM_001048212 | 12854 | -0.41 | -0.53 | 0.25  | 1.09  | 0.78  | 1.00  | -0.67 | -0.82 | -0.26 | -0.69 | 2.86  | -1.22 |
| C13ORF1     | 57213  | NM_001127482 | 12855 | -0.34 | -0.37 | -0.70 | 0.07  | -0.05 | -0.23 | -0.42 | -0.39 | -0.43 | -1.41 | -0.81 | -1.22 |
| FNDC3B      | 6452   | NM_002763    | 12856 | 0.28  | 0.48  | 0.78  | 0.57  | 0.87  | 0.87  | -0.57 | -0.47 | -0.57 | -0.57 | 0.87  | -1.22 |
| HYPC        | 25766  | NM_00101698  | 12857 | 0.25  | 0.07  | -0.39 | 0.33  | 0.29  | 0.85  | -0.21 | -0.24 | -0.79 | -0.07 | 1.47  | -1.22 |
| OR10AD1     | 121275 | NM_001004134 | 12858 | -1.04 | 0.50  | -1.57 | -0.88 | -0.13 | -0.74 | -0.70 | 0.53  | -1.07 | -2.12 | -1.76 | -1.22 |
| IT1         | 232    | NM_00100819  | 12859 | -0.25 | -0.02 | -0.18 | 0.65  | 0.65  | 0.65  | -0.65 | -0.65 | -0.65 | -0.65 | 1.59  | -1.22 |
| SKL         | 6488   | NM_005414    | 12860 | 0.24  | -0.47 | 0.06  | 0.46  | 1.68  | 0.40  | -0.20 | -0.83 | -0.20 | -0.17 | 2.55  | -1.22 |
| PHN1A       | 5093   | NM_000977    | 12861 | -0.15 | -0.63 | 1.27  | 1.10  | 0.28  | 1.19  | -0.69 | -0.65 | 0.11  | 0.50  | 2.58  | -1.22 |
| HANK-N2     | 48419  | NM_001009615 | 12862 | -0.40 | -0.78 | 0.07  | 0.35  | 0.23  | 0.67  | -0.37 | -0.37 | -0.37 | -0.37 | 0.67  | -1.22 |
| PHF7        | 51533  | NM_173341    | 12863 | 0.05  | 0.45  | 0.98  | 1.74  | 1.60  | 1.22  | -0.57 | -0.37 | -0.29 | 0.89  | 4.57  | -1.22 |
| ZNF85       | 7639   | NM_003429    | 12864 | 0.94  | 0.92  | 0.77  | 1.45  | 1.56  | 1.21  | -0.43 | -0.47 | -0.33 | 2.64  | 4.22  | -1.22 |
| RBM21       | 55147  | NM_118107    | 12865 | -0.42 | -0.25 | -0.21 | 0.81  | 0.55  | 0.80  | -0.17 | -0.67 | -0.45 | -0.40 | 1.66  | -1.22 |
| CCNA26      | 115236 | NM_173471    | 12866 | 0.64  | -0.44 | -1.33 | -1.23 | -0.62 | -0.68 | -0.62 | -0.68 | -0.62 | -1.30 | 1.97  | -1.22 |
| POD10A      | 10846  | NM_006661    | 12867 | -1.09 | -1.30 | -0.23 | 0.64  | 0.62  | 0.78  | -0.72 | -1.31 | 0.79  | -2.62 | 0.48  | -1.22 |
| MAPP38      | 1326   | NM_005204    | 12868 | -0.50 | 0.25  | 0.30  | 0.29  | 0.41  | 0.16  | -0.76 | -0.31 | -0.17 | 0.05  | 0.87  | -1.22 |
| MAP3A2      | 11685  | NM_002803    | 12869 | 0.88  | 0.09  | 0.99  | 0.88  | 0.88  | 0.88  | -0.88 | -0.88 | -0.88 | -0.88 | 0.88  | -1.22 |
| MGC34713    | 285000 | NM_173665    | 12870 | -0.25 | 0.11  | -0.16 | -0.57 | 0.    |       |       |       |       |       |       |       |



|             |        |              |       |       |       |       |       |       |       |       |       |       |       |       |       |
|-------------|--------|--------------|-------|-------|-------|-------|-------|-------|-------|-------|-------|-------|-------|-------|-------|
| P5326       | 83638  | NM_031450    | 12953 | -1.51 | -1.28 | -1.54 | -0.99 | 2.01  | -1.78 | -0.89 | 0.12  | 0.50  | -4.33 | -4.18 | -1.27 |
| FL12788     | 64427  | NM_021492    | 12954 | -0.69 | -0.21 | -0.49 | -0.31 | -0.65 | -0.31 | -0.49 | 0.21  | 0.49  | -0.79 | 0.53  | -1.07 |
| HMTM11      | 3275   | NM_001535    | 12955 | 0.88  | 0.51  | -0.06 | 0.22  | 0.14  | -0.18 | -0.82 | -0.41 | -0.03 | 1.44  | 0.19  | -1.27 |
| TNFSF6      | 356    | NM_000639    | 12956 | -0.41 | -0.38 | -0.26 | -0.34 | 0.27  | 0.31  | -0.19 | -0.44 | -0.64 | -1.05 | 0.44  | -1.27 |
| FLA2117     | 20084  | NM_198463    | 12957 | -0.66 | -0.59 | -0.80 | -0.64 | -0.58 | -0.58 | -0.44 | -0.47 | -0.36 | -2.04 | -1.80 | -1.27 |
| CCRE234     | 11316  | NM_0392      | 12958 | 0.32  | 0.47  | -0.47 | 0.72  | 0.47  | -0.72 | 0.47  | -0.47 | 0.72  | 0.87  | 0.66  | -1.27 |
| TES2        | 10420  | NM_007170    | 12959 | -0.51 | -0.38 | -0.19 | -0.74 | 0.41  | -0.08 | -0.71 | -0.42 | -0.13 | -1.07 | 1.07  | -1.27 |
| ADAM10      | 102    | NM_001110    | 12960 | -0.24 | -1.05 | -0.53 | -0.17 | -0.48 | -0.65 | -0.36 | -0.89 | -0.01 | -1.82 | -1.30 | -1.27 |
| CHD2        | 116    | NM_045271    | 12961 | 0.19  | 0.23  | 0.04  | 0.15  | 0.05  | 0.40  | -0.10 | 1.02  | 0.40  | 1.14  | 2.99  | -1.27 |
| FLJ13220    | 60558  | NM_021927    | 12962 | -0.29 | -0.58 | 0.03  | 0.34  | 0.05  | 0.38  | -0.63 | -0.35 | -0.29 | -0.84 | 0.77  | -1.27 |
| EPH3        | 2049   | NM_004443    | 12963 | 0.33  | -0.39 | -0.88 | 0.21  | -0.44 | -0.89 | -0.19 | -0.49 | -0.59 | -0.94 | -1.12 | -1.27 |
| GLI17       | 6341   | NM_000887    | 12964 | -0.18 | -0.64 | -0.27 | -0.58 | -0.07 | -0.63 | -0.18 | -0.34 | -0.79 | -0.61 | 2.10  | -1.27 |
| DMC1        | 11144  | NM_007068    | 12965 | -0.29 | -0.69 | -0.16 | -0.51 | -0.43 | 0.21  | -0.29 | 0.34  | -0.64 | -0.81 | 0.73  | -1.27 |
| PHCA        | 55331  | NM_018367    | 12966 | -0.22 | 0.97  | -0.43 | 0.19  | 1.71  | 1.90  | -0.23 | -0.38 | -0.66 | 0.51  | 2.80  | -1.27 |
| PKA1P1      | 55903  | NM_017906    | 12967 | 0.02  | 0.23  | -0.08 | 0.84  | 0.59  | 0.60  | -0.47 | -0.06 | -0.73 | 0.40  | 3.06  | -1.27 |
| SIBSP4      | 23077  | NM_014521    | 12968 | 0.22  | 0.00  | -1.07 | 1.29  | -0.02 | 0.16  | 0.24  | -0.02 | 0.16  | 0.84  | 1.43  | -1.27 |
| ITGA        | 3683   | NM_002209    | 12969 | -0.46 | -0.72 | 0.41  | -0.93 | 0.22  | 0.16  | -0.45 | -0.78 | -0.04 | -0.77 | -0.56 | -1.27 |
| TNFR556     | 164656 | NM_153009    | 12970 | -1.83 | -0.26 | -1.83 | -2.80 | -2.15 | -2.55 | -0.49 | -0.15 | -0.64 | -3.92 | -7.51 | -1.27 |
| LOC114900   | 214990 | NM_138440    | 12971 | -1.41 | -1.32 | -1.74 | -1.70 | -1.42 | 0.47  | 0.22  | -0.51 | -0.99 | -4.48 | 0.65  | -1.27 |
| RPS6K2      | 6196   | NM_00106932  | 12972 | 0.73  | 0.37  | 0.51  | 1.32  | 0.50  | 1.33  | -0.47 | -0.41 | -0.40 | 1.60  | 3.15  | -1.27 |
| RP26        | 6154   | NM_000987    | 12973 | -1.30 | -1.16 | -0.98 | -1.96 | -1.74 | -1.32 | -0.64 | -0.25 | -0.38 | -3.44 | -5.02 | -1.27 |
| TIP20A      | 55832  | NM_001848    | 12974 | -1.37 | -1.09 | -1.10 | -1.12 | -1.31 | -0.38 | -0.21 | -0.47 | -0.60 | -3.56 | -2.81 | -1.27 |
| SMARCA2     | 6595   | NM_139045    | 12975 | 0.98  | 0.58  | -0.36 | 0.28  | -0.46 | -0.68 | -0.77 | -0.68 | 0.18  | 1.92  | 0.85  | -1.27 |
| FH          | 2271   | NM_000143    | 12976 | -0.06 | -0.47 | -0.17 | 1.17  | 0.97  | 1.02  | -0.45 | -0.50 | -0.33 | -0.70 | 3.15  | -1.27 |
| GAP2        | 54834  | NM_00115589  | 12977 | -0.71 | -0.01 | -0.39 | 0.03  | 0.54  | 0.79  | -0.69 | -0.16 | -0.43 | -1.11 | 1.86  | -1.27 |
| TSL1        | 10955  | NM_198041    | 12978 | -0.13 | 0.13  | -0.11 | 0.47  | 0.57  | 0.03  | 0.43  | 0.54  | 0.30  | 0.96  | 1.02  | -1.28 |
| FLJ13488    | 130162 | NM_001135588 | 12979 | -0.59 | -0.22 | 0.01  | 0.74  | 0.05  | 0.25  | -0.78 | -0.51 | 0.01  | -0.81 | 1.04  | -1.28 |
| S10A13      | 6284   | NM_01024213  | 12980 | -0.57 | 1.12  | 0.45  | 1.08  | 1.14  | 1.42  | -1.04 | 0.31  | 0.55  | 1.00  | 8.63  | -1.28 |
| MARCK2      | 5157   | NM_0205616   | 12981 | 0.80  | 0.24  | 0.58  | 0.67  | 0.50  | 0.14  | -0.15 | 0.16  | 0.11  | 1.13  | 0.23  | -1.28 |
| LOC00555    | 414236 | NM_00101791  | 12982 | -0.84 | -1.19 | 0.23  | 1.10  | -1.03 | -0.03 | -0.72 | -0.50 | -0.06 | -1.80 | 4.97  | -1.28 |
| KIAA1463    | 57609  | NM_173602    | 12983 | -1.18 | -1.25 | -1.20 | -1.49 | -1.45 | -1.05 | -0.33 | -0.50 | -0.45 | -3.63 | -3.98 | -1.28 |
| PHS1        | 2034   | NM_000430    | 12984 | -0.86 | -0.98 | -1.24 | -0.88 | -0.95 | -0.28 | -0.48 | -0.38 | -0.48 | -1.19 | -1.08 | -1.28 |
| SO2         | 10736  | NM_016932    | 12985 | 0.48  | 0.45  | -0.87 | -1.11 | -0.57 | -0.72 | -0.55 | -0.14 | -0.59 | -1.80 | -1.40 | -1.28 |
| ABHD6       | 57406  | NM_020676    | 12986 | 0.24  | 0.34  | 1.05  | 0.71  | 0.62  | 0.80  | -0.68 | -0.27 | -0.34 | 1.63  | 2.12  | -1.28 |
| FNB         | 2317   | NM_001457    | 12987 | -0.80 | -0.53 | -0.44 | -0.18 | -0.07 | -0.40 | -0.69 | -0.57 | -0.02 | -1.78 | -0.65 | -1.28 |
| TBRM44      | 54762  | NM_017283    | 12988 | -0.55 | 0.66  | 0.03  | 0.60  | 0.25  | 0.80  | 0.02  | 0.50  | 0.08  | 1.42  | 0.68  | -1.28 |
| Chorf22     | 492807 | NM_001007176 | 12989 | -0.05 | 0.01  | -0.99 | 1.42  | 0.72  | 0.36  | 0.18  | -0.58 | -0.88 | -0.93 | 2.51  | -1.28 |
| FLJ44290    | 375347 | NM_198564    | 12990 | 0.37  | -0.12 | -0.26 | 0.96  | 0.65  | 0.67  | -0.31 | -0.34 | -0.63 | 0.00  | 2.28  | -1.28 |
| SLC22A14    | 9389   | NM_001183    | 12991 | -0.22 | 0.73  | 0.18  | 0.12  | 0.12  | 0.10  | -0.12 | 0.10  | -0.12 | 0.89  | 2.50  | -1.28 |
| LOC051503   | 651503 | NM_00108042  | 12992 | -0.82 | 1.88  | 0.13  | 2.58  | 1.72  | 2.05  | -0.50 | -0.08 | -0.85 | 2.83  | 3.36  | -1.28 |
| LOC10013189 | 1E+08  | NM_00112891  | 12993 | -1.03 | -1.04 | -0.35 | -0.82 | -0.80 | -0.74 | -0.60 | -0.54 | -0.14 | -2.41 | -2.36 | -1.28 |
| 34149       | 34149  | NM_00100094  | 12994 | -1.13 | -1.34 | 0.73  | 1.52  | 2.58  | 2.10  | -0.62 | -0.56 | -0.49 | -6.40 | 6.40  | -1.28 |
| ANKRD20A    | 84210  | NM_032250    | 12995 | -0.48 | -0.53 | 0.31  | 0.84  | 0.41  | 0.32  | -0.70 | -0.51 | -0.07 | -0.70 | 1.57  | -1.28 |
| MAGEA9      | 4108   | NM_005365    | 12996 | -0.71 | -0.22 | -1.02 | -0.74 | 0.58  | -0.38 | -0.40 | -0.38 | -0.51 | -1.94 | -0.54 | -1.28 |
| LOC147991   | 147991 | NM_207325    | 12997 | -0.24 | -0.70 | 0.17  | 0.34  | -0.13 | -0.28 | -0.84 | -0.16 | -0.87 | 0.24  | -1.28 | -1.28 |
| NF          | 262674 | NM_178864    | 12998 | 0.25  | 0.13  | 0.18  | 0.14  | 0.12  | 0.43  | 0.12  | 0.43  | 0.12  | 0.57  | 4.86  | -1.28 |
| TSSCA       | 10078  | NM_005706    | 12999 | -0.67 | -0.66 | 0.08  | 0.85  | 0.42  | 0.29  | -0.73 | -0.49 | -0.06 | -1.25 | 1.56  | -1.28 |
| ZNF546      | 389527 | NM_178544    | 13000 | -0.17 | -0.31 | -1.07 | 0.85  | 1.31  | 1.99  | 0.05  | -0.35 | -0.99 | -1.54 | 4.14  | -1.28 |
| ZNF56       | 7354   | NM_000598    | 13001 | -0.59 | -0.70 | -0.73 | -0.59 | -0.70 | -0.73 | -0.59 | -0.70 | -0.73 | -2.48 | -0.45 | -1.28 |
| FLJ20309    | 54891  | NM_017759    | 13002 | 0.18  | -0.32 | 0.04  | 0.53  | 0.11  | 0.65  | -0.29 | -0.62 | -0.37 | -0.11 | 1.29  | -1.28 |
| RPS3        | 6188   | NM_001005    | 13003 | -1.08 | -0.98 | -1.47 | -1.31 | -0.27 | -0.87 | 0.15  | -0.61 | -0.82 | -3.52 | -2.45 | -1.28 |
| PRDM2       | 39119  | NM_000304888 | 13004 | 0.17  | -0.06 | -0.42 | 0.69  | 0.55  | 0.36  | -0.65 | -0.36 | -0.65 | 0.95  | 0.24  | -1.28 |
| CCL1        | 51554  | NM_016557    | 13005 | 0.21  | -0.24 | 0.41  | 1.84  | 0.80  | 1.12  | -0.66 | -0.53 | -0.10 | -0.38 | 3.76  | -1.28 |
| LRRC15      | 131578 | NM_130830    | 13006 | -1.04 | -0.53 | -0.20 | 0.29  | -0.33 | 0.26  | -1.00 | -0.51 | 0.22  | -1.77 | 0.21  | -1.29 |
| CSTF18      | 7905   | NM_005669    | 13007 | -0.03 | 0.19  | 0.58  | 1.14  | 1.12  | 1.25  | -0.69 | -0.49 | -0.10 | 0.74  | 4.21  | -1.29 |
| MTNR1B      | 454    | NM_000598    | 13008 | -0.50 | -0.15 | 0.68  | 0.10  | -0.19 | 0.14  | -0.12 | -0.16 | -0.11 | -1.33 | 0.65  | -1.29 |
| GTC1        | 79712  | NM_024659    | 13009 | -0.29 | 0.01  | -0.64 | 0.50  | 0.62  | 0.32  | -0.18 | -0.47 | -0.64 | -0.34 | 1.44  | -1.29 |
| LOC10346    | 56109  | NM_032986    | 13010 | -0.81 | -0.25 | -0.69 | -0.39 | -0.22 | -0.39 | -0.82 | -0.01 | -0.46 | -1.75 | -0.90 | -1.29 |
| NMKN9       | 2909   | NM_01010563  | 13011 | -0.04 | -0.40 | 0.74  | 0.14  | 0.55  | 0.75  | -0.14 | -0.14 | 0.14  | 1.18  | 2.57  | -1.29 |
| MTSR4Y      | 9087   | NM_004202    | 13012 | -0.72 | 0.70  | 0.03  | 0.88  | 0.46  | -0.45 | -0.83 | -0.58 | 0.13  | -1.39 | 0.90  | -1.29 |
| TNND1       | 1500   | NM_001331    | 13013 | -1.11 | -0.94 | 1.78  | 2.54  | 2.67  | 2.06  | -0.61 | -0.60 | -0.08 | -3.83 | 7.27  | -1.29 |
| LOC147111   | 147111 | NM_178493    | 13014 | -1.24 | -0.65 | -0.88 | -0.82 | -0.48 | -0.99 | -0.82 | -0.43 | -0.86 | -2.77 | -1.55 | -1.29 |
| LOC440295   | 440295 | NM_198181    | 13015 | -0.01 | -0.25 | -0.72 | -0.07 | 0.10  | -0.25 | -0.23 | -0.48 | -0.58 | -0.88 | -0.22 | -1.29 |
| HCRTR1      | 3061   | NM_001525    | 13016 | -0.12 | 0.00  | -0.48 | 0.43  | 0.15  | 0.11  | -0.52 | -0.19 | -0.58 | -0.60 | 0.68  | -1.29 |
| LOC10346    | 56113  | NM_032986    | 13017 | 0.53  | 0.12  | -0.38 | 1.43  | 0.67  | 0.32  | -0.40 | -0.11 | -0.78 | 0.26  | 2.42  | -1.29 |
| FNS         | 568    | NM_001179    | 13018 | 0.22  | 0.25  | 0.88  | 0.15  | 0.68  | 0.15  | -0.59 | -0.85 | -0.16 | -0.85 | 1.23  | -1.29 |
| NRXN2       | 9379   | NM_138734    | 13019 | 0.01  | 0.05  | -0.88 | 0.57  | 0.52  | 0.09  | -0.30 | -0.42 | -0.56 | -0.82 | 1.18  | -1.29 |
| TWSTN8      | 221830 | NM_00102026  | 13020 | -0.36 | -0.13 | -0.42 | -0.57 | 0.07  | 0.19  | -0.50 | -0.28 | -0.52 | -0.91 | -0.30 | -1.29 |
| ISS1        | 1075   | NM_000207    | 13021 | -0.80 | 0.00  | 0.20  | 1.24  | 1.56  | 1.24  | -0.58 | -0.40 | -0.43 | -1.25 | 2.01  | -1.29 |
| HAN11       | 10238  | NM_001003725 | 13022 | -1.04 | -0.77 | -0.49 | -1.17 | -0.73 | -0.36 | -0.74 | -0.56 | 0.01  | -2.30 | -1.26 | -1.29 |
| SEC3L1      | 22872  | NM_016211    | 13023 | 0.58  | -0.39 | -0.72 | 0.70  | 1.67  | 1.17  | 0.21  | -0.80 | -0.71 | -0.53 | 3.54  | -1.29 |
| NF2L2       | 2310   | NM_0010779   | 13024 | -0.24 | -0.60 | -0.78 | -0.24 | -0.60 | -0.78 | -0.24 | -0.60 | -0.78 | -0.34 | 0.42  | -1.29 |
| SLC5A3      | 85414  | NM_033102    | 13025 | 0.70  | -0.49 | -0.64 | 0.92  | 0.42  | 1.83  | 0.13  | -0.49 | -0.93 | -0.43 | 1.36  | -1.29 |
| UAP1L1      | 91373  | NM_207309    | 13026 | -0.20 | -0.49 | -0.69 | 0.66  | 1.28  | 0.53  | -0.16 | -0.53 | -0.60 | -1.39 | 2.47  | -1.29 |
| FEL         | 55979  | NM_019028    | 13027 | -0.33 | 0.00  | -0.39 | 1.34  | 0.54  | -0.12 | -0.52 | -0.42 | -0.35 | -0.72 | 1.77  | -1.29 |
| OPD2        | 54857  | NM_001711    | 13028 | 0.43  | 0.14  | 0.39  | 0.69  | 0.43  | 0.69  | 0.43  | 0.69  | 0.43  | 0.96  | 1.26  | -1.29 |
| TNFR59      | 3604   | NM_001561    | 13029 | 0.10  | -0.85 | 0.21  | 1.47  | 1.91  | 0.19  | -0.56 | -1.23 | 0.49  | -0.54 | 3.18  | -1.29 |
| ZNF589      | 51385  | NM_016089    | 13030 | -0.57 | -0.22 | -0.25 | 0.48  | 0.14  | 0.10  | -0.58 | -0.51 | -0.21 | -1.04 | 0.72  | -1.29 |
| NIZ         | 2186   | NM_000459    | 13031 | -0.22 | 0.37  | 0.40  | 0.59  | 0.67  | 0.40  | -0.67 | -0.40 | -0.67 | -1.00 | 0.63  | -1.29 |
| ARH         | 26119  | NM_015627    | 13032 | -0.44 | -0.23 | 0.08  | 0.47  | 0.24  | 1.76  |       |       |       |       |       |       |

|           |        |              |       |       |       |       |       |       |       |       |       |       |       |       |       |
|-----------|--------|--------------|-------|-------|-------|-------|-------|-------|-------|-------|-------|-------|-------|-------|-------|
| YARS      | 8565   | NM_003680    | 13115 | -0.61 | 0.49  | -0.53 | 0.29  | 0.48  | -0.10 | -0.72 | -0.29 | 0.52  | -0.65 | 0.66  | -1.33 |
| SCAM95    | 19268  | NM_001867    | 13116 | -0.42 | -0.36 | -0.67 | 0.49  | 0.43  | 0.17  | -0.49 | -0.22 | -0.68 | -1.46 | -0.68 | -1.28 |
| ABP1      | 86     | NM_001091    | 13117 | 1.34  | 1.12  | 0.17  | 1.21  | 1.46  | 1.46  | -0.25 | -0.44 | -0.64 | 2.63  | 4.13  | 1.33  |
| AF3M2     | 10947  | NM_006803    | 13118 | -0.17 | -0.11 | -0.09 | 1.11  | 0.57  | 0.68  | -0.67 | -0.56 | -0.09 | -0.38 | 2.35  | -1.33 |
| LOC399818 | 999818 | NM_212554    | 13119 | -0.40 | -0.69 | 0.12  | 0.03  | 0.11  | -0.14 | -0.44 | -0.70 | -0.19 | -0.97 | 0.00  | -1.33 |
| SU42      | 55959  | NM_0007      | 13120 | -0.07 | 0.39  | 0.21  | 0.29  | 0.45  | 0.29  | 0.45  | 0.29  | 0.66  | 0.29  | 4.21  | -1.33 |
| LOC81569  | 81569  | NM_030812    | 13121 | -0.95 | 0.22  | 0.01  | 0.81  | 0.49  | 0.85  | -0.88 | -0.19 | -0.25 | -0.52 | 2.15  | -1.33 |
| KNA1008   | 22894  | NM_014953    | 13122 | 0.35  | -0.29 | -0.55 | 0.10  | -0.33 | -0.04 | -0.37 | -0.36 | -0.60 | -0.49 | -0.27 | -1.33 |
| CTF27     | 2332   | NM_013235    | 13123 | 0.22  | 0.17  | 0.45  | 0.22  | 0.17  | 0.46  | 0.22  | 0.17  | 0.46  | 0.22  | 1.04  | -1.33 |
| NE12      | 252969 | NM_145043    | 13124 | 0.02  | -0.08 | 0.32  | 0.02  | 0.52  | 0.58  | -0.38 | -0.49 | -0.46 | 0.26  | 1.12  | -1.33 |
| MGC10084  | 255520 | NM_153702    | 13125 | 0.15  | -0.22 | -0.17 | 0.44  | 0.87  | 0.49  | -0.24 | -0.66 | -0.43 | -0.54 | 1.80  | -1.33 |
| SP2       | 146    | NM_001365    | 13126 | -0.37 | -0.25 | -0.18 | 1.08  | 0.32  | 0.67  | -0.37 | -0.25 | -0.18 | -0.60 | 0.37  | -1.33 |
| RP28      | 6358   | NM_001186316 | 13127 | 0.51  | -0.15 | -0.54 | 1.22  | 1.21  | 1.70  | -0.30 | -0.21 | -0.82 | -0.19 | 4.14  | -1.33 |
| TSP-NY    | 84660  | NM_032573    | 13128 | -0.45 | -0.49 | -0.07 | 0.58  | -0.66 | 0.53  | -0.61 | -0.14 | -0.58 | -1.02 | 0.45  | -1.33 |
| DNR3      | 55769  | NM_018300    | 13129 | 0.52  | -0.22 | 0.03  | 1.07  | 0.53  | 1.03  | -0.36 | -0.32 | -0.64 | 0.33  | 3.21  | -1.33 |
| PCMB15    | 5612   | NM_018935    | 13130 | -0.67 | -0.50 | 0.03  | -0.59 | 0.04  | -0.07 | -0.57 | -0.66 | -0.10 | -1.14 | -0.62 | -1.33 |
| FLI0874   | 55248  | NM_018252    | 13131 | 0.23  | -0.11 | 0.12  | 0.88  | 0.69  | 1.04  | -0.45 | -0.45 | -0.43 | 0.25  | 2.61  | -1.33 |
| CI40RF148 | 122945 | NM_138791    | 13132 | -1.48 | -0.99 | -0.81 | -1.07 | -1.03 | -1.25 | -0.95 | -0.61 | 0.22  | -3.28 | -3.34 | -1.33 |
| OR1065    | 28452  | NM_001004666 | 13133 | 0.23  | 0.23  | 0.49  | 0.70  | 0.74  | 0.81  | -0.45 | -0.79 | -0.09 | 0.08  | 2.25  | -1.33 |
| ORS1V1    | 283111 | NM_001004760 | 13134 | -0.65 | -0.05 | -0.87 | -0.21 | -0.31 | -0.49 | -0.61 | -0.25 | -0.48 | -1.57 | -1.02 | -1.33 |
| MPH05PH6  | 10200  | NM_005792    | 13135 | -0.52 | -0.55 | -1.29 | 0.10  | 0.23  | -0.98 | -0.46 | -0.23 | -0.65 | -2.37 | -0.65 | -1.33 |
| CLCS      | 53405  | NM_010939    | 13136 | -0.86 | -0.37 | -0.61 | 0.08  | -0.32 | 0.03  | -0.67 | 0.16  | -0.82 | -1.83 | -0.21 | -1.33 |
| NOP       | 4093   | NM_000266    | 13137 | -0.44 | -0.03 | -0.11 | 0.79  | 0.99  | 1.05  | 0.44  | -0.47 | -0.42 | 0.57  | 2.83  | -1.33 |
| NUSAP1    | 51203  | NM_018454    | 13138 | -1.47 | -1.26 | -0.34 | -2.59 | -2.43 | -0.76 | -0.51 | -0.46 | -0.36 | -3.07 | -5.77 | -1.33 |
| FLI1730   | 64769  | NM_022756    | 13139 | -0.65 | -0.96 | 0.13  | 0.39  | 0.44  | 0.97  | -0.38 | -0.69 | -0.27 | -1.47 | 1.80  | -1.33 |
| KM2       | 9487   | NM_004813    | 13140 | -1.12 | -0.84 | -1.11 | -0.91 | -0.64 | -0.88 | -0.62 | -0.23 | -0.48 | -3.06 | -2.42 | -1.33 |
| EL20RA    | 53832  | NM_014432    | 13141 | 0.05  | 0.38  | -0.61 | 0.48  | -0.10 | 0.98  | -0.32 | -0.18 | -0.84 | -0.18 | 1.37  | -1.33 |
| HRH2      | 3274   | NM_022304    | 13142 | -1.07 | -1.23 | -0.14 | -0.57 | -1.19 | 1.32  | -0.14 | -0.35 | -0.84 | -0.30 | -6.64 | -1.34 |
| CLCS      | 561    | NM_000949    | 13143 | -1.28 | -1.37 | -0.43 | -1.18 | -0.59 | 0.20  | -0.42 | -0.35 | -0.84 | -0.52 | 1.08  | -1.34 |
| DCP18     | 196513 | NM_152640    | 13144 | -0.35 | 0.63  | 1.14  | 3.20  | 1.33  | 1.91  | -0.99 | -0.15 | -0.20 | 1.42  | 6.44  | -1.34 |
| CAMT24    | 23125  | NM_010599    | 13145 | -0.70 | -0.66 | -0.94 | -1.08 | -0.64 | -0.88 | -0.20 | -0.49 | -0.64 | -2.31 | -2.60 | -1.34 |
| MANUC200  | 361    | NM_000300    | 13146 | -0.69 | -0.68 | -0.55 | -0.79 | -0.60 | -0.85 | -0.79 | -0.60 | -0.85 | -0.79 | -0.60 | -1.34 |
| CRLP202   | 83716  | NM_031476    | 13147 | 0.04  | -0.66 | 0.87  | 1.02  | 1.89  | 1.67  | -0.32 | -0.98 | -0.03 | 0.17  | 4.57  | -1.34 |
| SUC2A2    | 6514   | NM_000340    | 13148 | -0.42 | 0.43  | 0.84  | -0.30 | 0.87  | 3.59  | -0.21 | -0.40 | -0.72 | 0.84  | 4.16  | -1.34 |
| MNK2C     | 2972   | NM_017572    | 13149 | -0.47 | 0.41  | 0.69  | 2.34  | 2.15  | 3.06  | -0.79 | 0.04  | -0.59 | 0.63  | 7.55  | -1.34 |
| KNA1844   | 321452 | NM_134448    | 13150 | 1.13  | 0.44  | 0.94  | 0.42  | 0.56  | 0.01  | -0.42 | 1.42  | 0.62  | 2.72  | 0.88  | -1.34 |
| DI159A13  | 27245  | NM_00102882  | 13151 | -0.16 | 0.22  | -0.06 | 0.73  | 0.63  | 1.04  | -0.51 | -0.26 | -0.57 | 0.00  | 2.40  | -1.34 |
| EXTL3     | 2137   | NM_001440    | 13152 | -0.13 | 0.40  | -0.55 | 0.54  | 0.50  | 0.23  | -0.49 | -0.29 | -0.55 | -0.48 | 1.27  | -1.34 |
| HL5       | 851    | NM_000995    | 13153 | -0.52 | -0.88 | 0.68  | 1.19  | 1.39  | 1.82  | -0.38 | -0.52 | -0.82 | -1.48 | 4.55  | -1.34 |
| LOC401898 | 401898 | NM_001013691 | 13154 | 0.50  | -0.58 | -0.39 | 0.60  | 0.05  | 0.59  | -0.24 | -0.46 | -0.63 | -0.47 | 1.24  | -1.34 |
| KNA1164   | 54629  | NM_001040653 | 13155 | 0.00  | -0.29 | 1.19  | 2.44  | 0.71  | 1.30  | -0.88 | -0.73 | 0.27  | 0.89  | 4.46  | -1.34 |
| KNA00502  | 23870  | NM_001000000 | 13156 | -1.07 | -0.29 | -1.10 | -1.29 | -1.17 | -1.29 | -1.17 | -1.29 | -1.17 | -1.43 | 1.16  | -1.34 |
| ZNF551    | 90231  | NM_138347    | 13157 | -1.12 | 0.25  | -0.83 | 0.07  | 0.80  | 0.07  | -0.34 | -0.38 | -0.62 | 0.60  | 0.80  | -1.34 |
| CI0RF26   | 54823  | NM_001105518 | 13158 | -0.56 | 0.40  | -0.12 | 0.55  | 1.42  | 0.01  | -0.66 | -0.28 | -0.40 | -0.28 | 1.98  | -1.34 |
| IDL       | 3480   | NM_001546    | 13159 | -0.68 | -1.02 | -1.14 | -0.40 | -0.83 | -1.14 | -0.41 | -0.59 | -0.34 | -2.84 | -2.37 | -1.34 |
| FL145645  | 375287 | NM_198557    | 13160 | -0.52 | -0.55 | -0.43 | -0.71 | -0.43 | -0.52 | -0.45 | -0.43 | -0.71 | -0.43 | 2.02  | -1.34 |
| EFE48P1   | 19718  | NM_004095    | 13161 | -0.79 | -0.60 | -0.95 | -0.32 | -0.76 | -0.07 | -0.45 | -0.30 | -0.60 | -2.33 | -1.14 | -1.34 |
| FL131153  | 123811 | NM_144600    | 13162 | -0.59 | -0.40 | -0.68 | -0.15 | -0.23 | 0.02  | -0.68 | -0.12 | -0.54 | -1.31 | -0.36 | -1.34 |
| BMP1      | 8280   | NM_020243    | 13163 | -0.11 | 0.47  | -0.07 | 0.82  | 1.18  | 1.62  | -0.45 | -0.82 | -0.42 | -0.29 | 3.53  | -1.34 |
| USP3      | 54532  | NM_019050    | 13164 | -0.14 | 0.05  | -0.21 | 1.22  | 0.60  | 0.96  | -0.67 | -0.10 | -0.57 | -0.30 | 2.78  | -1.34 |
| NM12      | 9397   | NM_004088    | 13165 | -0.56 | -0.09 | -0.14 | 0.29  | 0.20  | 0.47  | -0.60 | -0.39 | -0.35 | -0.79 | 0.96  | -1.34 |
| WAC1      | 7415   | NM_001000078 | 13166 | -0.32 | -0.81 | -0.74 | -0.66 | -0.32 | -0.81 | -0.66 | -0.32 | -0.81 | -1.32 | -0.79 | -1.34 |
| HMG11     | 10357  | NM_001000875 | 13167 | 0.84  | 0.07  | 0.61  | 1.01  | 0.55  | 1.67  | -0.35 | -0.61 | -0.38 | 1.22  | 3.24  | -1.34 |
| CP461     | 10858  | NM_006668    | 13168 | -0.75 | 0.13  | 0.03  | 0.58  | 1.19  | 1.11  | -0.58 | -0.37 | -0.39 | -0.59 | 2.87  | -1.34 |
| ADP1      | 221558 | NM_153042    | 13169 | -1.00 | 4.97  | 0.77  | 8.00  | 1.59  | 1.07  | -1.12 | -0.03 | -0.20 | 4.74  | 10.66 | -1.34 |
| NUP133    | 55746  | NM_042320    | 13170 | -0.61 | 0.94  | -0.23 | 0.48  | -0.03 | -0.86 | -0.42 | -0.32 | -0.59 | -0.52 | 1.16  | -1.34 |
| M3        | 58058  | NM_021230    | 13171 | 0.98  | 0.88  | 0.37  | 1.47  | 1.72  | 2.44  | -0.24 | -0.52 | -0.59 | 2.23  | 5.63  | -1.34 |
| RCP9      | 27297  | NM_014478    | 13172 | -0.46 | -0.17 | -0.14 | 0.57  | 0.01  | 0.03  | -0.60 | -0.43 | -0.31 | -0.76 | 0.61  | -1.34 |
| LOC40848  | 26569  | NM_152777    | 13173 | -0.26 | 0.55  | -0.57 | 0.56  | 1.23  | 1.67  | -0.26 | -0.55 | -0.57 | -1.34 | 1.90  | -1.34 |
| MGC4728   | 374928 | NM_198542    | 13174 | -0.77 | 0.30  | -0.49 | -0.39 | -0.09 | 0.81  | -0.77 | 0.05  | -0.62 | -0.97 | 1.10  | -1.34 |
| BAEC2     | 25825  | NM_012340    | 13175 | -0.37 | -0.17 | -0.80 | -0.15 | 0.20  | 0.08  | -0.33 | -0.24 | -0.77 | -1.35 | 0.13  | -1.34 |
| DNW5      | 44192  | NM_001004698 | 13176 | -1.13 | 0.49  | -0.55 | -0.76 | -1.00 | -0.56 | -1.13 | 0.49  | -0.55 | -1.58 | 3.27  | -1.34 |
| CKL5F3    | 123920 | NM_181555    | 13177 | -0.93 | -1.20 | -0.79 | -2.28 | -0.66 | -0.34 | -0.48 | -0.73 | -0.14 | -2.92 | -1.28 | -1.34 |
| MYT3      | 7994   | NM_006766    | 13178 | 0.14  | -0.65 | -0.01 | 0.65  | -0.15 | 1.13  | -0.30 | -0.59 | -0.46 | -0.52 | 1.62  | -1.34 |
| MP4       | 58538  | NM_033066    | 13179 | -0.40 | -0.26 | -0.68 | 1.70  | 1.39  | 2.20  | -0.54 | -0.47 | -0.34 | -0.98 | 3.28  | -1.34 |
| OR181     | 7915   | NM_001870    | 13180 | -0.93 | -0.67 | 0.11  | 0.47  | 0.73  | 0.85  | -0.73 | -0.67 | 0.11  | -0.98 | 3.66  | -1.34 |
| CI40RF31  | 122786 | NM_152330    | 13181 | -1.23 | -0.29 | -0.11 | 0.39  | 1.02  | 1.56  | -0.84 | -0.39 | -0.12 | -1.41 | 2.97  | -1.34 |
| IRPFP1    | 9208   | NM_004735    | 13182 | -0.60 | -1.07 | -0.27 | 0.33  | 0.21  | 0.36  | -0.07 | -0.83 | -0.59 | -1.94 | 0.90  | -1.35 |
| LOC40110  | 124695 | NM_145255    | 13183 | -0.40 | -0.19 | -0.60 | 0.40  | 0.40  | 0.40  | -0.19 | -0.60 | 0.40  | -0.19 | 1.20  | -1.35 |
| BCAP31    | 10134  | NM_005745    | 13184 | -0.39 | -0.95 | -0.40 | 0.00  | 0.44  | -0.93 | -0.45 | -0.76 | -0.14 | -1.74 | -0.49 | -1.35 |
| CDCA7L    | 55536  | NM_001127371 | 13185 | -0.26 | -0.62 | -0.25 | 0.11  | -0.47 | 0.28  | -0.56 | -0.59 | -0.20 | -1.12 | -0.08 | -1.35 |
| RP56L1    | 8369   | NM_0011464   | 13186 | -0.86 | -0.75 | -0.48 | -0.10 | 0.41  | 0.36  | -0.86 | -0.75 | -0.48 | -1.07 | 1.26  | -1.35 |
| LY64      | 4064   | NM_005582    | 13187 | -0.52 | -0.06 | 0.31  | 0.11  | 0.43  | 0.58  | -0.79 | -0.40 | -0.16 | -1.12 | 1.35  | -1.35 |
| EFL1X     | 1964   | NM_001412    | 13188 | -1.69 | -1.94 | -2.04 | -2.01 | -2.36 | -2.66 | -0.38 | -0.97 | -0.75 | -5.67 | -7.02 | -1.35 |
| PP1K1     | 6992   | NM_021959    | 13189 | -0.36 | -0.50 | -0.57 | -0.69 | -0.53 | -0.19 | -0.63 | -0.99 | -0.61 | -1.43 | -0.14 | -1.35 |
| HPT1042   | 8969   | NM_001904    | 13190 | -0.62 | -0.68 | -0.96 | -0.62 | -0.68 | -0.96 | -0.62 | -0.68 | -0.96 | -2.25 | 1.76  | -1.35 |
| LOC387601 | 387601 | NM_199352    | 13191 | -0.42 | 0.31  | 0.07  | 1.51  | 2.21  | 0.55  | -0.72 | -0.25 | -0.38 | -0.04 | 4.27  | -1.35 |
| BROG1     | 26228  | NM_012108    | 13192 | -0.59 | 0.63  | -0.49 | 0.75  | 1.21  | 0.80  | -0.25 | -0.16 | -0.93 | 0.73  | 2.76  | -1.35 |
| LOC3      | 9345   | NM_031455    | 13193 | -0.25 | -0.15 | -0.45 | 0.17  | 0.67  | 0.14  | -0.27 | -0.16 | -0.47 | 0.89  | 0.71  | -1.35 |
| ADR18A    | 147    | NM_000679    | 13194 | -0.55 | -0.33 | -0.44 | 1.24  | 0.9   |       |       |       |       |       |       |       |

|              |        |             |       |       |       |       |       |       |       |       |       |       |       |       |       |
|--------------|--------|-------------|-------|-------|-------|-------|-------|-------|-------|-------|-------|-------|-------|-------|-------|
| WDR18        | 57418  | NM_024100   | 13277 | -0.39 | -0.08 | -0.48 | -0.45 | 0.17  | 0.25  | -0.49 | -0.39 | -0.70 | -0.95 | -0.03 | -1.38 |
| AFIC3        | 3801   | NM_005650   | 13278 | 0.03  | -0.26 | -0.57 | -0.21 | 0.16  | 0.36  | -0.48 | -0.36 | -0.56 | -0.59 | 0.76  | -1.28 |
| TGFRAP1      | 9392   | NM_004357   | 13279 | 0.33  | 0.49  | -0.84 | -0.15 | -0.08 | -0.24 | -0.31 | -0.44 | -0.63 | -1.60 | 0.48  | -1.38 |
| ZNF526       | 116115 | NM_133444   | 13280 | -1.05 | -0.58 | -1.01 | -0.99 | 0.01  | -0.53 | -0.48 | -0.46 | -0.44 | -2.64 | -1.50 | -1.38 |
| HUPL1        | 340598 | NM_178175   | 13281 | -0.43 | -0.40 | 0.08  | 0.54  | 0.81  | 0.19  | -0.63 | -0.61 | -0.14 | -0.75 | 1.54  | -1.38 |
| DOC1         | 493    | NM_002339   | 13282 | -1.02 | -1.02 | 1.28  | 0.36  | 0.12  | -1.31 | -0.53 | -0.47 | -0.62 | -3.66 | 0.97  | -1.38 |
| AAMP         | 14     | NM_001087   | 13283 | -1.10 | -1.14 | -1.39 | -0.82 | -0.87 | -0.43 | -0.73 | -0.21 | -0.68 | -3.63 | -2.12 | -1.38 |
| ZDHHC22      | 285756 | NM_174976   | 13284 | -0.66 | 0.63  | 0.51  | 0.75  | 0.53  | 0.54  | -1.04 | -0.19 | -0.15 | 0.48  | 1.82  | -1.38 |
| RG3          | 5719   | NM_00503233 | 13285 | 0.21  | 0.21  | 0.54  | 0.49  | 0.12  | 0.54  | 0.41  | 0.14  | 0.14  | 0.54  | 1.40  | -1.38 |
| PGRMC1       | 10857  | NM_006667   | 13286 | -0.42 | 0.20  | -1.87 | -0.61 | -0.72 | 1.42  | -0.10 | -0.44 | -0.72 | -2.49 | 0.09  | -1.38 |
| ZNF342       | 162979 | NM_145288   | 13287 | -1.03 | -1.15 | -1.21 | -1.87 | -2.02 | -1.20 | -0.41 | -0.47 | -0.49 | -3.39 | -5.18 | -1.38 |
| SNR2         | 644    | NM_002810   | 13288 | -0.64 | -0.59 | -1.20 | -0.81 | 0.12  | -1.18 | -0.60 | -0.21 | -0.10 | -1.34 | 1.23  | -1.38 |
| AVP1         | 60370  | NM_021732   | 13289 | -1.08 | 0.52  | 0.52  | 0.72  | 0.14  | 0.36  | -1.18 | -0.69 | 0.49  | -1.08 | 1.22  | -1.38 |
| GAGE8        | 26749  | NM_00112700 | 13290 | -0.86 | 0.00  | -1.11 | -0.30 | -0.01 | 0.25  | -0.68 | 0.24  | 0.95  | -1.97 | -0.06 | -1.38 |
| SOCS1        | 8651   | NM_003745   | 13291 | -0.99 | -1.10 | -1.16 | -0.82 | -0.43 | -1.51 | -0.29 | -0.76 | -0.34 | -3.25 | -2.76 | -1.38 |
| GOCTC        | 132158 | NM_145062   | 13292 | -0.30 | 0.66  | -1.14 | -0.52 | -0.25 | 0.24  | -0.31 | -0.22 | 0.85  | -2.11 | -0.53 | -1.38 |
| LOC147166    | 147166 | NM_00103730 | 13293 | -0.78 | -0.74 | -1.22 | -0.28 | -0.59 | -0.83 | -0.51 | -0.30 | -0.57 | -1.74 | -1.71 | -1.38 |
| PARVG        | 64998  | NM_022141   | 13294 | -0.05 | -0.36 | -0.76 | 0.00  | 1.10  | 0.82  | -0.20 | -0.50 | -0.68 | -1.17 | 1.92  | -1.38 |
| ZFPM2        | 23414  | NM_012082   | 13295 | -0.42 | -0.45 | 0.36  | 1.68  | 1.37  | 1.10  | -0.85 | -0.69 | 0.15  | -0.51 | 4.15  | -1.38 |
| STAT2        | 6773   | NM_005419   | 13296 | -1.00 | 0.09  | -0.18 | 0.88  | -0.01 | 0.40  | -0.56 | -0.20 | -0.62 | 0.01  | 1.27  | -1.38 |
| TRAF4        | 9618   | NM_145751   | 13297 | 5.59  | 8.39  | 2.06  | 8.95  | 8.94  | 7.80  | -0.24 | -0.53 | -0.61 | 16.04 | 25.70 | -1.38 |
| PARO6        | 84552  | NM_023210   | 13298 | -0.48 | -0.19 | -0.50 | 0.57  | -0.28 | -0.01 | -0.42 | -0.32 | -0.65 | -0.96 | 0.28  | -1.38 |
| SERPIN12     | 89777  | NM_080474   | 13299 | -0.48 | -0.82 | -1.22 | -0.57 | -1.07 | -0.70 | -0.27 | -0.19 | -0.92 | -2.52 | 2.33  | -1.38 |
| MCA          | 4276   | NM_000247   | 13300 | -1.10 | -1.07 | -1.35 | -0.84 | -1.46 | -0.49 | -0.42 | 0.01  | -0.97 | -3.51 | -2.79 | -1.38 |
| IFI          | 2754   | NM_014451   | 13301 | -0.24 | -0.05 | 0.34  | 1.94  | 0.86  | 0.99  | -0.44 | -0.68 | -0.26 | 0.53  | 3.73  | -1.39 |
| FLJ25200     | 35363  | NM_144715   | 13302 | -0.05 | 0.42  | -0.62 | 0.75  | 1.30  | 0.40  | 0.03  | 0.72  | 0.71  | -1.09 | 2.53  | -1.39 |
| RANBP2       | 5903   | NM_006267   | 13303 | 0.15  | 0.21  | -0.81 | 0.81  | 0.81  | 0.04  | -0.52 | -0.45 | -0.42 | -0.45 | -1.59 | -1.39 |
| DCR9         | 25703  | NM_148875   | 13304 | -0.27 | -0.25 | -0.75 | -0.06 | 1.71  | 0.99  | 0.13  | -0.60 | -0.91 | -1.27 | 2.64  | -1.39 |
| PSMD10       | 5397   | NM_020807   | 13305 | -1.60 | -1.70 | -1.15 | -1.70 | -1.15 | -1.70 | -1.15 | -1.70 | -1.15 | -2.11 | 4.68  | -1.39 |
| MAOB         | 4129   | NM_000898   | 13306 | -0.08 | 0.19  | -0.61 | 0.37  | 0.30  | 0.98  | -0.22 | -0.35 | -0.82 | -0.51 | 1.65  | -1.39 |
| XPO1         | 7514   | NM_003400   | 13307 | -1.28 | -1.60 | -1.93 | -2.12 | -1.87 | -2.26 | -0.09 | -0.62 | -0.68 | -4.81 | -6.25 | -1.39 |
| ACTN2        | 48     | NM_001103   | 13308 | -0.24 | -0.61 | 0.16  | -0.39 | 0.07  | 0.49  | -0.37 | -0.16 | -0.24 | -0.69 | 1.54  | -1.39 |
| CSRP3        | 8048   | NM_003476   | 13309 | 0.63  | 0.61  | 1.16  | 0.27  | 1.31  | 0.54  | -0.52 | -1.09 | 0.22  | 0.07  | 2.12  | -1.39 |
| SUC2B3       | 64078  | NM_022127   | 13310 | -0.67 | -0.74 | -0.70 | -0.48 | 0.66  | 0.66  | -0.53 | -0.78 | -0.09 | -2.12 | -0.68 | -1.39 |
| FLJ1722      | 55764  | NM_025990   | 13311 | -0.30 | 0.63  | -0.53 | 0.56  | 0.89  | 0.08  | -0.70 | -0.15 | -0.54 | -0.20 | 1.53  | -1.39 |
| TRAF15-1     | 24450  | NM_181023   | 13312 | -1.03 | -0.89 | -1.04 | -0.89 | -0.57 | -0.20 | -0.57 | -0.62 | -0.36 | -0.59 | 0.61  | -1.39 |
| RF11-3P115.5 | 442444 | NM_00101376 | 13313 | -0.42 | -0.23 | -0.68 | 0.07  | -0.02 | -0.12 | -0.41 | -0.43 | -0.55 | -1.33 | -0.06 | -1.39 |
| FLJ1767      | 79645  | NM_024593   | 13314 | -0.10 | 0.14  | -0.73 | 1.12  | 0.81  | 1.41  | -0.33 | -0.27 | -0.79 | -0.48 | 3.34  | -1.39 |
| PCW11        | 9211   | NM_023110   | 13315 | -0.20 | 0.54  | -0.40 | 0.59  | 0.05  | 0.02  | -0.42 | -0.39 | -0.05 | -1.81 | 0.51  | -1.39 |
| ILRN         | 3557   | NM_173842   | 13316 | -0.45 | 0.41  | -0.14 | -0.83 | 0.12  | 0.22  | -0.65 | -0.45 | -0.29 | -1.00 | 1.16  | -1.39 |
| LOC146909    | 146909 | NM_945202   | 13317 | -0.96 | -0.67 | -0.86 | -0.56 | 0.15  | -0.11 | 0.05  | -0.57 | -0.88 | -2.49 | -0.52 | -1.39 |
| NOL3         | 898    | NM_001846   | 13318 | -0.23 | -0.75 | -0.73 | -0.11 | -0.25 | -0.73 | -0.11 | -0.25 | -0.73 | -0.48 | -0.45 | -1.39 |
| CBNL1        | 140889 | NM_080617   | 13319 | -0.00 | -1.23 | -1.32 | -0.67 | -0.36 | -0.24 | 0.41  | -0.90 | 0.90  | 2.55  | 1.27  | -1.39 |
| CDH2         | 1000   | NM_001792   | 13320 | 0.70  | -0.26 | 0.61  | 1.65  | 2.15  | 1.83  | -0.09 | -0.77 | -0.54 | 1.06  | 5.62  | -1.39 |
| KHLH5        | 80311  | NM_030624   | 13321 | -0.33 | 0.23  | -0.67 | -0.25 | 0.14  | -0.82 | -0.58 | -0.32 | -0.50 | -0.77 | -0.93 | -1.39 |
| RFC5         | 32     | NM_001839   | 13322 | 0.25  | 0.31  | 0.01  | 0.78  | 1.03  | 0.51  | 0.47  | 0.13  | 0.57  | 1.38  | 0.39  | -1.39 |
| TNXC4        | 23071  | NM_015051   | 13323 | -0.58 | 0.13  | 0.01  | -1.09 | 1.09  | 0.47  | -0.54 | -0.56 | -0.29 | -0.70 | 2.65  | -1.39 |
| GRP107       | 57720  | NM_020960   | 13324 | 0.35  | 0.17  | 0.01  | 1.67  | 1.11  | 0.73  | -0.57 | -0.40 | -0.42 | 0.53  | 3.51  | -1.39 |
| NR0060       | 9081   | NM_00104705 | 13325 | 1.05  | -0.65 | 0.21  | -0.52 | -0.42 | -0.42 | -0.42 | -0.42 | -0.42 | -0.42 | 0.79  | -1.39 |
| NOB1P        | 28897  | NM_014062   | 13326 | -0.36 | -0.82 | -0.72 | 0.40  | 0.18  | 0.31  | -0.21 | -0.62 | -0.56 | -1.90 | 0.89  | -1.39 |
| MTT14        | 64863  | NM_022840   | 13327 | -0.44 | -0.47 | -0.81 | -0.52 | 0.04  | 0.31  | 0.02  | -0.58 | -0.83 | -1.72 | -0.18 | -1.39 |
| MGC4821      | 203238 | NM_00136006 | 13328 | 0.06  | -0.56 | -0.61 | -0.31 | -0.36 | -0.13 | -0.36 | -0.13 | -0.36 | -0.63 | 0.94  | -1.39 |
| NX2-4        | 26237  | NM_014360   | 13329 | 0.44  | -0.47 | -0.44 | -0.31 | 0.07  | 0.02  | -0.47 | -0.62 | -0.30 | -1.35 | -0.27 | -1.39 |
| DNCH2        | 79659  | NM_931085   | 13330 | -0.08 | -0.29 | -0.13 | 0.00  | -0.28 | 0.03  | -0.46 | -0.56 | -0.37 | -0.49 | -0.31 | -1.39 |
| MGC14289     | 92992  | NM_080650   | 13331 | -0.40 | -0.30 | -0.32 | 0.25  | 0.16  | 2.03  | -0.60 | -0.11 | -0.68 | -1.01 | 2.44  | -1.39 |
| YAP1         | 1041   | NM_006106   | 13332 | 0.10  | 0.69  | 0.45  | 0.22  | 0.42  | 0.11  | -0.63 | -0.63 | -0.10 | -1.36 | 0.58  | -1.39 |
| SCRN3        | 79634  | NM_024583   | 13333 | 0.37  | -0.20 | -0.16 | 0.20  | 0.31  | 0.66  | -0.10 | -0.68 | -0.62 | 0.01  | 2.99  | -1.40 |
| HC1          | 3090   | NM_006497   | 13334 | 0.16  | 0.04  | -0.41 | 1.41  | 1.47  | 1.62  | 0.18  | 0.71  | -0.86 | -0.21 | 4.50  | -1.40 |
| ADZF         | 6460   | NM_023219   | 13335 | 0.54  | 0.63  | 0.44  | 0.36  | 0.23  | 0.09  | -0.46 | -0.38 | -0.23 | -1.59 | 0.21  | -1.40 |
| EPO          | 2056   | NM_000799   | 13336 | -0.87 | -0.24 | -0.45 | 1.33  | 0.29  | 0.52  | -0.94 | -0.46 | 0.00  | -1.56 | 2.14  | -1.40 |
| TRK5         | 6913   | NM_152380   | 13337 | -0.66 | -0.83 | -0.92 | -0.21 | -0.07 | 0.67  | -0.45 | -0.21 | -0.74 | -2.41 | 0.39  | -1.40 |
| NHMS         | 3145   | NM_00102482 | 13338 | -0.46 | 0.11  | -0.28 | 1.81  | 1.22  | 0.72  | -0.67 | -0.15 | -0.56 | -0.62 | 0.75  | -1.40 |
| RFANK        | 8625   | NM_134440   | 13339 | -1.14 | -0.95 | -0.62 | -0.04 | -0.23 | 0.01  | -0.06 | -0.74 | -0.60 | -1.71 | -0.26 | -1.40 |
| FNS2         | 10818  | NM_006654   | 13340 | -0.52 | 0.22  | 0.84  | 0.91  | 0.21  | 0.89  | -0.78 | -0.39 | -0.22 | 0.54  | 2.01  | -1.40 |
| LOC91801     | 91801  | NM_138775   | 13341 | -1.15 | -0.80 | -0.61 | -0.59 | 0.43  | 0.30  | -0.23 | -0.74 | -0.42 | -2.56 | 0.14  | -1.40 |
| HRE2         | 11542  | NM_152986   | 13342 | -0.30 | 0.24  | 0.04  | 0.27  | 0.15  | 0.24  | -0.49 | -0.49 | -0.50 | -0.50 | 0.85  | -1.40 |
| ZNF36        | 7586   | NM_003439   | 13343 | -0.80 | 0.12  | -0.15 | 0.83  | 0.89  | 0.07  | -0.73 | -0.49 | -0.18 | -0.83 | 1.80  | -1.40 |
| RG517        | 26575  | NM_012419   | 13344 | -0.41 | -0.29 | -0.81 | 1.40  | 0.98  | 0.03  | -0.77 | -0.33 | -0.29 | -1.51 | 2.41  | -1.40 |
| TRF2         | 7165   | NM_005079   | 13345 | -0.80 | -0.86 | -0.46 | -0.86 | -0.46 | -0.86 | -0.46 | -0.86 | -0.46 | -1.24 | 0.60  | -1.40 |
| RPL19        | 6143   | NM_000981   | 13346 | -1.68 | -1.78 | -1.84 | -2.44 | -2.56 | -2.75 | -0.42 | -0.23 | -0.75 | -5.30 | -7.75 | -1.40 |
| APC          | 324    | NM_000038   | 13347 | -0.52 | -0.63 | -0.80 | -0.57 | -1.10 | -0.33 | -0.44 | -0.37 | -0.59 | -1.96 | -2.00 | -1.40 |
| TNFRSF5      | 7113   | NM_005656   | 13348 | -0.45 | -0.76 | -0.55 | -0.40 | -0.10 | -0.55 | -0.45 | -0.76 | -0.55 | -1.76 | -0.72 | -1.40 |
| ABHDG1A      | 996    | NM_004309   | 13349 | 0.34  | 0.33  | -0.19 | -0.14 | -0.36 | 0.65  | 0.48  | 0.37  | 0.56  | 0.86  | 0.15  | -1.40 |
| DEF130       | 245940 | NM_00103704 | 13350 | -1.16 | -0.72 | -1.28 | -1.19 | -0.58 | -0.96 | -0.64 | -0.58 | -0.18 | -3.16 | -1.13 | -1.40 |
| PFT1A        | 262497 | NM_178161   | 13351 | -0.43 | -0.34 | -0.38 | 0.83  | 0.31  | 0.69  | -0.25 | -0.37 | -0.78 | -0.29 | 1.83  | -1.40 |
| CSO2         | 11046  | NM_009001   | 13352 | 0.57  | 0.47  | 0.25  | 0.62  | 0.63  | 0.62  | -0.05 | -0.63 | -0.05 | -1.14 | 1.40  | -1.40 |
| MGN1         | 23295  | NM_015246   | 13353 | -0.78 | -0.95 | -1.01 | -0.02 | -0.69 | -0.05 | -0.26 | -0.41 | -0.73 | -2.74 | -0.76 | -1.40 |
| CAVR1        | 857    | NM_001753   | 13354 | 0.40  | 1.22  | 0.38  | 1.75  | 1.51  | 1.44  | -0.57 | -0.26 | -0.58 | -2.00 | 4.70  | -1.40 |
| ATROV1G3     | 12714  | NM_132652   | 13355 | 0.59  | 0.11  | 0.24  | 0.62  | 0.11  | 0.24  | 0.62  | 0.11  | 0.24  | 0.94  | 0.86  | -1.40 |
| MB2          | 8932   | NM_015832   | 13356 | -0.77 | -0.76 | -1.32 | -0.56 | -0.66 | -0.24 | -0.49 | -0.28 | -1.19 | -2.85 | -1.45 | -1.40 |
| FBX07        |        |             |       |       |       |       |       |       |       |       |       |       |       |       |       |

|             |        |              |       |       |       |       |       |       |       |       |       |       |       |         |       |
|-------------|--------|--------------|-------|-------|-------|-------|-------|-------|-------|-------|-------|-------|-------|---------|-------|
| KMA2010     | 55671  | NM_017936    | 19439 | -0.63 | -0.08 | -0.80 | 0.52  | -0.20 | 0.71  | -0.78 | 0.03  | -0.68 | -1.51 | 1.04    | -1.44 |
| BOHE        | 2199   | NM_012055    | 19440 | -0.20 | 0.30  | 0.35  | 1.20  | -1.12 | 2.27  | -0.70 | -0.27 | 0.38  | 1.20  | 1.23    | -1.04 |
| LOC283537   | 283537 | NM_181785    | 19441 | -0.21 | 0.47  | -0.59 | 0.49  | 0.24  | 0.22  | -0.34 | -0.50 | -0.60 | -1.27 | 0.94    | -1.44 |
| PPP2CB      | 5516   | NM_004156    | 19442 | 0.63  | 0.31  | -0.47 | 2.16  | 0.53  | 2.10  | -0.82 | 0.17  | -0.79 | -0.78 | 4.79    | -1.44 |
| DSPF        | 1854   | NM_014208    | 19443 | 0.73  | 0.84  | -0.76 | 1.08  | 0.75  | 1.00  | -0.24 | -0.23 | -0.97 | 0.81  | 2.82    | -1.44 |
| PP5225      | 2702   | NM_145074    | 19444 | -0.31 | 0.19  | 0.64  | 0.41  | -0.54 | 0.41  | -0.54 | -0.41 | -0.54 | 1.54  | 0.71    | -1.44 |
| GORPZ06     | 22141  | NM_152732    | 19445 | -0.16 | 0.67  | 0.17  | 0.56  | 1.36  | 1.56  | -0.43 | -0.29 | -0.72 | 0.68  | 3.49    | -1.44 |
| RA37        | 326264 | NM_00106637  | 19446 | 0.09  | -0.43 | -0.34 | 0.51  | 0.38  | -0.08 | -0.38 | -0.67 | -0.38 | -0.67 | 0.84    | -1.44 |
| CD80        | 91     | NM_014471    | 19447 | -0.05 | 0.06  | -0.05 | 0.11  | 0.02  | 0.11  | -0.05 | -0.30 | 0.11  | 0.02  | 1.31    | -1.44 |
| TU1281-TY   | 51599  | NM_010101    | 19448 | -0.64 | -0.63 | -0.27 | 0.36  | 0.70  | 0.58  | -0.74 | -0.80 | 0.10  | -1.54 | 1.64    | -1.44 |
| SCRT1       | 83482  | NM_031309    | 19449 | -1.01 | -1.20 | -0.97 | -0.18 | -0.50 | -0.47 | -0.67 | -0.44 | -0.33 | -1.37 | -1.15   | -1.44 |
| NDR         | 5817   | NM_004527    | 19450 | -0.33 | -0.89 | -0.57 | 0.50  | 0.14  | -0.58 | -0.60 | -0.47 | -0.58 | -1.80 | 0.27    | -1.44 |
| PCP4        | 5121   | NM_006198    | 19451 | -0.79 | 1.54  | -2.05 | -0.81 | -0.90 | 0.94  | 1.26  | 1.22  | -1.48 | 4.38  | -2.66   | -1.44 |
| KMA1193     | 57570  | NM_020810    | 19452 | 0.81  | 0.21  | -0.05 | 1.23  | 0.54  | 1.75  | -0.20 | -0.60 | -0.64 | 0.96  | 3.52    | -1.44 |
| SFR4        | 6424   | NM_003014    | 19453 | -0.48 | -0.19 | -0.21 | 2.01  | 2.00  | 1.19  | -0.65 | -0.77 | -0.01 | -0.88 | 5.21    | -1.44 |
| ISG2        | 9860   | NM_048113    | 19454 | -0.19 | 0.04  | 0.02  | 0.47  | -0.03 | 1.53  | -0.51 | -0.33 | 0.60  | 0.21  | 1.97    | -1.44 |
| TBC1D17     | 79735  | NM_024682    | 19455 | -0.59 | -1.05 | -0.74 | -0.16 | 0.27  | -0.06 | -0.08 | -0.89 | -0.46 | -2.37 | 0.05    | -1.44 |
| CDorf017    | 140710 | NM_199181    | 19456 | -0.24 | -0.27 | 0.15  | 1.98  | 1.62  | 1.61  | -0.79 | -0.40 | -0.25 | -0.38 | 5.21    | -1.44 |
| GG99        | 2861   | NM_005260    | 19457 | -0.67 | -0.08 | -0.70 | 0.40  | -0.16 | 0.09  | -0.85 | 0.06  | -0.66 | -1.46 | 0.33    | -1.44 |
| HRIIPS      | 27247  | NM_001002757 | 19458 | -1.09 | -1.16 | -1.47 | -0.68 | -1.55 | -1.33 | -0.60 | -0.31 | -0.54 | -3.72 | -3.56   | -1.44 |
| HMAC7A      | 51564  | NM_016596    | 19459 | -0.22 | -0.48 | -0.01 | 0.67  | 0.94  | 0.65  | -0.43 | -0.65 | -0.36 | -0.71 | 2.27    | -1.44 |
| GPC3        | 126326 | NM_133261    | 19460 | -1.02 | -0.94 | -0.38 | 1.52  | 1.04  | 2.12  | -0.85 | -0.59 | 0.00  | -2.24 | 4.68    | -1.45 |
| PHOX2A      | 401    | NM_005169    | 19461 | 0.90  | -0.45 | -0.91 | -0.62 | -1.06 | -0.78 | -0.87 | 0.14  | -0.71 | -2.25 | -2.46   | -1.45 |
| MAPK8       | 5599   | NM_139049    | 19462 | 0.85  | -0.21 | -0.71 | 0.35  | 0.28  | 1.21  | 0.16  | -0.66 | -0.94 | -0.06 | 1.84    | -1.45 |
| ED1         | 8721   | NM_153200    | 19463 | -1.00 | -1.03 | -0.84 | 0.30  | 0.50  | -0.19 | -0.91 | -0.71 | 0.20  | -2.87 | 0.61    | -1.45 |
| KIAM60      | 23248  | NM_015003    | 19464 | 0.54  | 0.12  | -0.03 | 2.45  | 1.43  | 1.37  | 0.63  | -0.37 | 0.45  | 0.64  | 5.25    | -1.45 |
| ARHGAP9     | 23229  | NM_015185    | 19465 | 0.23  | 0.51  | 0.42  | 1.22  | 1.49  | 1.75  | -0.39 | -0.46 | -0.60 | 1.17  | 4.46    | -1.45 |
| PKRAG2      | 51422  | NM_016203    | 19466 | -0.58 | -0.56 | -0.74 | 0.00  | 0.21  | 0.05  | -0.29 | -0.57 | -0.59 | -1.88 | 0.26    | -1.45 |
| GAT4        | 2120   | NM_055272    | 19467 | 0.25  | 0.11  | 0.02  | 0.62  | 0.19  | 0.42  | -0.14 | -0.59 | -0.42 | 0.08  | 5.05    | -1.45 |
| TRPA1       | 8989   | NM_007332    | 19468 | -0.42 | -0.89 | -0.94 | 0.04  | -0.83 | -0.11 | -0.45 | -0.39 | -0.60 | -2.25 | -0.89   | -1.45 |
| ISM2        | 57819  | NM_021177    | 19469 | -0.80 | -1.64 | -1.89 | -2.13 | -3.02 | -1.93 | 0.01  | -0.63 | -0.83 | -4.33 | -7.08   | -1.45 |
| EPSTL1      | 9439   | NM_012325    | 19470 | 0.10  | 0.31  | 0.10  | 0.21  | 0.10  | 0.31  | -0.22 | -0.10 | 0.31  | 0.21  | 4.01    | -1.45 |
| CP11C       | 126329 | NM_152359    | 19471 | -0.78 | -0.66 | -0.47 | -0.22 | 0.82  | 0.21  | -0.28 | -0.65 | -0.85 | -1.89 | 0.82    | -1.45 |
| SON         | 6651   | NM_138925    | 19472 | -1.60 | -1.60 | -2.16 | -2.72 | -3.15 | -2.35 | -0.57 | 0.11  | -0.99 | -5.36 | -8.22   | -1.45 |
| FLJ2001     | 163862 | NM_152609    | 19473 | -0.24 | -0.27 | 0.13  | 0.90  | 0.52  | 1.46  | -0.66 | -0.52 | -0.27 | -0.39 | 5.28    | -1.45 |
| MAGE01      | 9500   | NM_001003332 | 19474 | -0.87 | -0.76 | -0.45 | 0.77  | -1.08 | -0.58 | -0.07 | -0.38 | -0.07 | -0.66 | 2.08    | -1.45 |
| TNKB        | 7148   | NM_032470    | 19475 | -0.87 | -0.50 | -0.36 | 0.46  | 0.95  | 1.29  | -0.48 | -0.15 | -0.82 | -1.73 | 2.70    | -1.45 |
| ZNF202      | 7753   | NM_003455    | 19476 | -1.01 | -0.91 | -1.38 | -1.25 | -0.52 | -1.09 | -0.36 | -0.35 | -0.73 | -3.30 | -2.86   | -1.45 |
| IC1         | 8021   | NM_018329    | 19477 | -0.67 | -0.83 | -0.29 | 0.83  | -1.29 | 0.18  | -0.12 | -0.83 | -0.29 | -2.41 | 1.03    | -1.45 |
| HST111C     | 3006   | NM_005319    | 19478 | 0.59  | -0.44 | 0.18  | 1.21  | 0.89  | 1.02  | -0.26 | -0.69 | -0.50 | 0.33  | 3.12    | -1.45 |
| RMF3        | 11342  | NM_183184    | 19479 | 0.82  | 0.02  | -0.31 | 0.87  | 2.05  | 1.21  | -0.12 | -0.57 | -0.76 | 0.53  | 4.13    | -1.45 |
| 56355       | 56355  | NM_048072    | 19480 | 0.43  | 0.25  | 0.06  | 0.27  | 0.42  | 0.56  | -0.27 | -0.42 | 0.73  | 0.73  | 2.82    | -1.45 |
| CCDC10      | 989    | NM_00101553  | 19481 | -0.27 | -0.10 | -0.11 | 0.27  | 1.81  | 1.05  | -0.31 | -0.55 | -0.59 | 0.06  | 3.12    | -1.45 |
| PR3         | 80742  | NM_01077497  | 19482 | 0.26  | -0.77 | -0.55 | -0.12 | 0.48  | -0.09 | -0.44 | -0.83 | -0.19 | -1.58 | 0.27    | -1.45 |
| UTP14C      | 9724   | NM_021445    | 19483 | -1.33 | 0.19  | 0.20  | 0.85  | 0.68  | 0.94  | -0.63 | -0.32 | -0.50 | 0.06  | 2.47    | -1.45 |
| CE2B        | 2623   | NM_043597    | 19484 | -0.19 | 0.19  | 0.11  | 0.42  | 0.89  | 0.33  | -0.48 | -0.32 | -0.46 | -0.09 | 3.02    | -1.45 |
| CM14B2      | 81846  | NM_030962    | 19485 | -1.32 | -1.21 | -1.49 | -1.23 | -1.03 | -1.13 | -0.36 | -0.49 | -0.60 | -4.01 | -3.38   | -1.45 |
| TB1         | 29110  | NM_013254    | 19486 | -0.40 | -0.06 | -0.38 | 0.15  | 0.74  | -0.43 | -0.32 | -0.63 | -0.50 | -0.04 | 4.47    | -1.45 |
| FKBP45      | 7946   | NM_043515    | 19487 | -0.76 | -0.41 | -0.60 | 0.71  | 0.70  | 2.12  | -0.22 | -0.71 | 0.70  | 1.77  | 4.52    | -1.45 |
| HSD17B7     | 51478  | NM_016371    | 19488 | -0.68 | -0.85 | -0.28 | 0.55  | 0.39  | 0.26  | -0.65 | -0.50 | -0.30 | -1.81 | 1.21    | -1.45 |
| FLJ4968     | 37487  | NM_198537    | 19489 | -0.46 | 0.73  | -0.32 | 1.43  | 0.96  | 0.88  | -0.67 | -0.17 | -0.61 | -0.05 | 3.27    | -1.45 |
| ACTD10      | 3489   | NM_013820    | 19490 | -0.55 | -0.05 | -0.46 | -0.78 | -0.74 | -0.78 | -0.74 | -0.78 | -0.74 | -2.11 | -1.98   | -1.45 |
| FNFR2       | 3460   | NM_005534    | 19491 | -0.50 | -0.08 | -0.46 | 0.75  | -0.15 | -0.28 | -0.68 | -0.27 | -0.51 | -1.05 | 0.31    | -1.45 |
| IGF2AS      | 51214  | NM_016412    | 19492 | 0.19  | -0.41 | -0.97 | 0.20  | 0.45  | 0.03  | -0.05 | -0.64 | -0.76 | -1.19 | 0.62    | -1.45 |
| STAT6/GAMM  | 9913   | NM_014860    | 19493 | -0.09 | -0.30 | -0.63 | 0.30  | -0.08 | -0.23 | -0.47 | -0.35 | -0.64 | -1.01 | 4.46    | -1.45 |
| MRE9        | 7888   | NM_020626    | 19494 | -0.42 | -1.13 | -0.40 | -0.45 | -0.45 | -0.45 | -0.45 | -0.45 | -0.45 | -0.45 | 0.59    | -1.45 |
| SLC6A6      | 10479  | NM_006359    | 19495 | -0.63 | -0.91 | -0.46 | -1.00 | 0.64  | -0.38 | -0.52 | -0.80 | -1.13 | -2.00 | 1.16    | -1.45 |
| LOC404636   | 404636 | NM_207009    | 19496 | -0.74 | -0.15 | -0.20 | 0.55  | 0.40  | 0.63  | -0.89 | -0.19 | -0.38 | -1.09 | 0.78    | -1.45 |
| TU2         | 1101   | NM_008852    | 19497 | 0.41  | 0.54  | 0.51  | 1.69  | 1.59  | 1.59  | 1.59  | 1.59  | 1.59  | 1.59  | 1.59    | -1.45 |
| ESX11       | 80712  | NM_153448    | 19498 | -0.26 | 0.10  | 0.52  | 1.21  | 1.19  | 1.46  | -0.48 | -0.53 | -0.44 | 0.36  | 3.86    | -1.46 |
| DKFZP344K11 | 83446  | NM_031290    | 19499 | 0.60  | -0.55 | -0.28 | 0.81  | 0.42  | 1.19  | 0.03  | -0.75 | -0.73 | -0.22 | 2.42    | -1.46 |
| ITSD1       | 21897  | NM_01020474  | 19500 | -0.87 | -1.34 | -0.97 | -1.49 | -1.49 | -1.49 | -1.49 | -1.49 | -1.49 | -2.54 | 0.64    | -1.46 |
| NHL2        | 4808   | NM_005599    | 19501 | -1.01 | -0.72 | -0.42 | 0.67  | 1.48  | -0.31 | -0.46 | -0.96 | -0.04 | -2.15 | 1.85    | -1.46 |
| GF108       | 56927  | NM_945409    | 19502 | 0.23  | -0.23 | -0.41 | 0.99  | 0.44  | 1.71  | -0.66 | -0.28 | -0.52 | -0.87 | 3.15    | -1.46 |
| CDR3F3      | 84909  | NM_023263    | 19503 | 0.68  | -0.39 | 0.51  | 1.63  | 1.98  | 2.27  | -0.36 | -0.44 | -0.66 | -1.58 | 5.87    | -1.46 |
| GT2H3       | 287    | NM_002146    | 19504 | -0.16 | 0.15  | 0.11  | 0.11  | 0.11  | 0.11  | -0.11 | -0.11 | -0.11 | -0.11 | 0.33    | -1.46 |
| LCN6        | 15862  | NM_198946    | 19505 | -0.12 | -0.62 | -0.51 | -0.20 | 0.67  | -0.28 | -0.38 | -0.77 | -0.31 | -1.25 | 0.19    | -1.46 |
| TBRD5       | 163589 | NM_173533    | 19506 | -1.01 | -1.04 | -0.84 | -1.32 | -0.45 | -1.42 | -0.63 | -0.93 | 0.11  | -2.90 | -3.19   | -1.46 |
| RNAK4       | 20229  | NM_078916    | 19507 | -0.48 | -0.21 | 0.05  | 0.40  | 0.89  | 1.10  | -0.82 | -0.68 | -0.68 | -0.68 | 2.92    | -1.46 |
| PBR4        | 11272  | NM_007244    | 19508 | -1.04 | -1.07 | 0.26  | 1.15  | 1.45  | 0.92  | -0.53 | -0.44 | -0.49 | -1.30 | 3.52    | -1.46 |
| ALG8        | 79053  | NM_024079    | 19509 | -1.12 | -0.21 | -0.64 | 0.48  | 0.41  | 0.18  | -0.40 | -0.57 | -0.49 | -0.73 | 1.07    | -1.46 |
| FG4         | 21133  | NM_013633    | 19510 | -0.57 | -0.81 | -0.69 | -0.81 | -1.06 | -0.61 | -0.61 | -0.61 | -0.61 | -0.61 | 0.24    | -1.46 |
| SLC30A6     | 55676  | NM_017964    | 19511 | 0.38  | -0.19 | 0.02  | 0.53  | 0.67  | 0.47  | 0.65  | -0.61 | -0.20 | 0.55  | 1.67    | -1.46 |
| KMA0789     | 9671   | NM_014653    | 19512 | -0.86 | -1.17 | -1.22 | 0.11  | -1.88 | 0.02  | -0.53 | -0.07 | -0.85 | -3.25 | -1.75   | -1.46 |
| CEK1        | 64781  | NM_182661    | 19513 | -0.29 | -0.38 | -0.37 | 0.24  | 0.34  | 0.48  | -0.57 | -0.55 | -0.34 | -1.04 | 1.06    | -1.46 |
| KMA0218     | 20217  | NM_00409899  | 19514 | -0.84 | -0.28 | -0.66 | 0.76  | -0.25 | -0.51 | -0.62 | -0.25 | -0.51 | -1.79 | 0.40    | -1.46 |
| HRLP5       | 117245 | NM_054108    | 19515 | -1.22 | -0.25 | -0.36 | -0.44 | -0.18 | 0.33  | -0.62 | -0.29 | -0.55 | -1.83 | -0.29   | -1.46 |
| KMA1194     | 57472  | NM_015455    | 19516 | -0.43 | -0.51 | -0.78 | 0.61  | 0.03  | 0.18  | -0.15 | -0.54 | -0.77 | -0.85 | 0.83    | -1.46 |
| ENCL12      | 119    | NM_096241    | 19517 | 0.07  | 1.26  | 1.26  | 1.26  | 1.26  | 1.26  | 1.26  | 1.26  | 1.26  | 1.26  | 1.42    | -1.46 |
| SIAT4A      | 6482   | NM_173344    | 19518 | -0.76 | -0.79 | -0.56 | -1.17 | 0.04  | -0.44 | -0.50 | -0.84 | -0.12 | -1.13 | -0.57</ |       |

|              |        |              |       |       |       |       |       |       |       |       |       |       |       |       |       |
|--------------|--------|--------------|-------|-------|-------|-------|-------|-------|-------|-------|-------|-------|-------|-------|-------|
| STAC         | 6769   | NM_003149    | 13601 | -0.31 | -1.16 | -0.96 | -0.92 | -0.07 | 0.32  | 0.32  | -0.98 | 0.83  | -2.43 | -0.67 | -1.49 |
| FL20834      | 25412  | NM_017900    | 13602 | -0.10 | -0.61 | -0.91 | -0.81 | -0.10 | 0.41  | 0.35  | -0.86 | 0.57  | -2.32 | -1.44 | -1.49 |
| CGORF78      | 221301 | NM_153036    | 13603 | -0.41 | 0.36  | -0.52 | 0.89  | 0.89  | 0.58  | 0.44  | -0.47 | -0.57 | -0.57 | 2.36  | -1.49 |
| FZRL1        | 2150   | NM_005242    | 13604 | -1.17 | -0.46 | -0.67 | -0.73 | -0.76 | -0.45 | -0.72 | -0.40 | -0.37 | -2.31 | -1.94 | -1.49 |
| INPFD        | 3635   | NM_005541    | 13605 | -0.68 | -0.40 | 0.16  | 2.66  | 2.05  | 1.59  | -1.09 | -0.67 | 0.21  | -0.93 | 0.30  | -1.49 |
| FL11142      | 55179  | NM_013038    | 13606 | -0.16 | 1.16  | 0.79  | 0.52  | 0.79  | 0.82  | 0.89  | 0.23  | -0.12 | -2.30 | -1.49 | -1.49 |
| FODXL5       | 653427 | NM_00126334  | 13607 | -0.26 | -0.51 | -0.93 | -0.20 | -0.48 | 0.22  | 0.34  | -0.24 | -0.91 | -1.70 | -0.46 | -1.49 |
| ZNF193       | 7746   | NM_006299    | 13608 | -1.68 | -0.03 | -0.70 | -0.01 | 0.64  | 0.45  | -0.26 | -0.47 | -0.76 | -1.41 | 1.09  | -1.49 |
| GFALS        | 3483   | NM_018070    | 13609 | -0.87 | 0.18  | -0.60 | -0.14 | 0.00  | -0.17 | -0.14 | 0.00  | -0.60 | -1.40 | 0.03  | -1.49 |
| VRT5         | 3852   | NM_000424    | 13610 | -1.05 | -0.49 | -0.68 | -0.23 | -0.48 | -0.28 | -0.77 | -0.17 | -0.55 | -1.00 | -1.49 | -1.49 |
| PLAT         | 5327   | NM_000931    | 13611 | 0.55  | -0.11 | -0.36 | 0.69  | 1.34  | 1.28  | 0.06  | 0.74  | -0.81 | -0.08 | 3.31  | -1.49 |
| FL20898      | 7963   | NM_010600    | 13612 | -0.49 | -0.57 | 0.17  | -0.11 | 0.11  | 0.11  | -0.11 | -0.11 | -0.11 | -0.11 | -0.11 | -1.49 |
| CD164        | 8763   | NM_006016    | 13613 | 0.26  | -0.39 | -0.34 | 0.74  | 0.04  | 1.26  | 0.52  | -0.50 | -0.47 | -0.99 | 2.05  | -1.49 |
| STAB2        | 55576  | NM_017564    | 13614 | -0.97 | 0.25  | -1.07 | 0.11  | 0.87  | -0.45 | -0.41 | -0.28 | -0.80 | -1.79 | 0.54  | -1.49 |
| RIF1         | 85547  | NM_013140    | 13615 | -0.38 | -0.42 | 0.23  | 0.59  | 0.24  | 1.35  | -0.52 | -0.48 | -0.49 | -0.56 | 2.18  | -1.49 |
| FL23819.C1.1 | 2952   | NM_015383    | 13616 | 0.29  | 0.56  | 0.76  | 1.41  | 1.43  | 1.26  | 0.62  | -0.42 | -0.66 | 1.60  | 4.10  | -1.49 |
| RP11-544M22  | 16408  | NM_001126312 | 13617 | -0.66 | -0.59 | 0.20  | 0.25  | 0.23  | 0.14  | -0.63 | -0.63 | -0.23 | -1.06 | 0.34  | -1.49 |
| LOC401944    | 401944 | NM_001013693 | 13618 | 1.28  | 1.13  | -0.23 | 1.38  | 2.57  | 0.76  | -0.40 | -0.57 | -0.52 | 2.18  | 4.71  | -1.49 |
| FRM02        | 257035 | NM_174908    | 13619 | -0.51 | -0.99 | -0.38 | 0.14  | 0.17  | 0.23  | -0.51 | -0.78 | -0.21 | -1.87 | 0.63  | -1.49 |
| CLDNA        | 1364   | NM_001305    | 13620 | -0.55 | -0.41 | 0.00  | -0.12 | 0.33  | 0.44  | -0.63 | -0.57 | -0.29 | -0.96 | 0.89  | -1.49 |
| PXR05        | 5026   | NM_175081    | 13621 | -0.02 | -0.23 | -0.91 | -0.13 | -0.01 | 0.05  | -0.30 | -0.30 | -0.89 | -1.16 | -0.09 | -1.49 |
| GF9          | 2815   | NM_000174    | 13622 | 0.70  | 0.37  | 0.73  | 1.55  | 2.03  | 3.34  | -0.40 | -0.44 | -0.65 | -1.79 | 2.32  | -1.49 |
| DEFB1048     | 503618 | NM_001040702 | 13623 | -0.93 | -0.27 | -0.26 | -0.51 | 0.01  | -0.11 | -0.56 | -0.54 | -0.39 | -1.06 | -0.62 | -1.49 |
| DAPP1        | 27071  | NM_014195    | 13624 | -0.19 | -0.27 | -0.37 | -0.09 | 0.18  | -0.19 | -0.33 | -0.54 | -0.62 | -0.83 | -0.11 | -1.49 |
| FLH0172      | 28551  | NM_173469    | 13625 | -0.40 | -0.52 | -0.40 | 1.21  | 1.50  | 0.57  | -0.71 | -0.59 | -0.19 | -1.31 | 3.28  | -1.49 |
| FL11036      | 55387  | NM_010806    | 13626 | -0.70 | -0.61 | -0.72 | 0.19  | 0.76  | 0.50  | -0.21 | -0.60 | -0.69 | -0.20 | 1.46  | -1.54 |
| MAP2K1       | 5604   | NM_002755    | 13627 | -0.30 | -0.24 | -1.05 | -0.66 | 0.25  | -0.03 | -0.31 | -0.41 | -0.78 | -1.58 | -0.43 | -1.50 |
| ADAM22       | 53616  | NM_021721    | 13628 | -0.41 | 0.95  | -0.01 | 1.84  | 2.41  | 2.48  | -0.82 | 0.01  | -0.68 | 0.52  | 6.73  | -1.50 |
| CDON57       | 16567  | NM_001040000 | 13629 | -0.55 | 0.50  | -0.39 | 0.12  | 1.17  | 1.84  | -0.12 | -0.06 | -0.16 | 0.63  | 2.33  | -1.50 |
| EYAA3        | 2140   | NM_172098    | 13630 | -1.20 | -0.68 | -0.10 | 1.65  | 1.65  | 1.73  | -0.94 | -0.80 | 0.24  | -1.98 | 4.44  | -1.50 |
| FL20291      | 54883  | NM_017748    | 13631 | -0.35 | 0.36  | -0.65 | -0.03 | 1.13  | -0.28 | -0.41 | -0.77 | -0.28 | -0.64 | 0.83  | -1.50 |
| NCT5         | 2889   | NM_013660    | 13632 | -0.27 | -0.75 | 0.59  | -0.17 | -0.37 | 0.59  | -0.37 | -0.37 | -0.45 | -1.21 | -1.50 | -1.50 |
| FL1764       | 283948 | NM_173815    | 13633 | -1.12 | 0.08  | -1.17 | 0.05  | -0.02 | 0.38  | -0.91 | -0.42 | -0.16 | -0.87 | 0.42  | -1.50 |
| ZNF503       | 84858  | NM_032772    | 13634 | -0.62 | -0.70 | -0.81 | -0.31 | -0.36 | 0.03  | -0.44 | -0.42 | -0.65 | -2.13 | -0.65 | -1.50 |
| THAP4        | 51078  | NM_015963    | 13635 | -0.41 | -0.77 | -0.12 | -0.11 | -0.37 | -0.23 | -0.53 | -0.81 | -0.16 | -1.26 | -0.70 | -1.50 |
| CCN1         | 10928  | NM_048535    | 13636 | -0.92 | 0.72  | -0.94 | 0.12  | 0.70  | 0.25  | -0.45 | -0.58 | -0.49 | -2.25 | 0.64  | -1.50 |
| KRT1         | 3848   | NM_006121    | 13637 | -0.13 | 0.10  | -0.58 | 0.33  | 0.79  | 0.71  | -0.30 | -0.45 | -0.75 | -0.62 | 1.82  | -1.50 |
| PCHT7        | 5059   | NM_002589    | 13638 | 0.06  | -0.62 | 0.06  | 0.33  | 0.59  | 0.75  | -0.26 | -0.67 | -0.58 | -0.50 | 1.67  | -1.50 |
| FL1025       | 51505  | NM_002379    | 13639 | -0.45 | -0.29 | -0.23 | 0.18  | 0.18  | 0.18  | -0.55 | -0.47 | -0.29 | -0.57 | 1.37  | -1.50 |
| TCEB2        | 6923   | NM_207013    | 13640 | -0.05 | 0.24  | 0.38  | 1.59  | 1.55  | 3.07  | -0.43 | -0.49 | -0.58 | 0.72  | 6.22  | -1.50 |
| FL25811      | 440699 | NM_00105214  | 13641 | -0.74 | -0.09 | -0.10 | -0.23 | -0.21 | 1.48  | -0.85 | 0.04  | -0.69 | -0.92 | 1.04  | -1.50 |
| FL142        | 31769  | NM_00105214  | 13642 | -0.03 | -0.40 | 0.49  | 0.84  | -0.10 | 0.69  | -0.10 | -0.10 | -0.10 | -0.41 | 1.07  | -1.50 |
| GRF4         | 2957   | NM_001033514 | 13643 | -1.09 | 0.01  | -1.08 | 0.81  | -0.02 | -0.10 | -1.10 | 0.07  | -0.48 | -2.15 | 0.61  | -1.50 |
| IGALS18P     | 3959   | NM_005567    | 13644 | -0.84 | -1.06 | -1.03 | -0.20 | -0.19 | 0.55  | -0.16 | -0.60 | -0.74 | -2.92 | 0.15  | -1.50 |
| FRB2         | 26995  | NM_015479    | 13645 | -1.16 | -0.75 | -0.98 | -0.25 | -0.12 | -0.02 | 0.06  | -0.67 | -0.90 | -1.57 | -0.39 | -1.50 |
| SNK27        | 8169   | NM_0001818   | 13646 | 0.23  | 0.50  | 0.57  | 0.07  | 0.58  | 0.47  | 0.07  | 0.58  | 0.47  | 0.84  | 0.41  | -1.50 |
| CSORF61      | 9413   | NM_00117608  | 13647 | -1.23 | -1.15 | -1.71 | -0.42 | -1.53 | -1.18 | -0.70 | -0.28 | -0.53 | -1.09 | -1.13 | -1.50 |
| LOC401250    | 401250 | NM_001013700 | 13648 | -1.04 | -1.50 | -1.47 | -1.02 | -0.71 | -0.53 | 0.04  | -1.10 | -0.44 | -0.40 | -2.26 | -1.50 |
| MOND         | 484    | NM_002763    | 13649 | -0.48 | -0.23 | -0.38 | -0.09 | 0.78  | -0.69 | 0.78  | -0.69 | 0.78  | -0.69 | 0.78  | -1.50 |
| OR2A7        | 34152  | NM_001005285 | 13650 | -1.30 | -0.88 | -0.51 | 0.10  | 1.14  | -0.07 | -0.30 | -0.71 | -0.50 | -0.89 | 1.18  | -1.51 |
| CSORF116     | 138162 | NM_144654    | 13651 | -0.52 | 0.14  | -0.07 | 0.60  | 0.37  | 1.13  | -0.81 | -0.19 | -0.51 | -0.46 | 2.10  | -1.51 |
| RAB13        | 20826  | NM_00105214  | 13652 | -1.69 | 0.67  | -0.27 | -0.83 | -0.67 | -0.27 | -0.83 | -0.67 | -0.27 | -2.08 | 0.89  | -1.51 |
| MYCBP        | 26292  | NM_012333    | 13653 | 0.20  | 1.11  | -0.69 | 0.67  | 1.66  | 0.48  | -0.37 | -0.29 | -0.85 | 0.61  | 2.81  | -1.51 |
| SEST         | 91404  | NM_178123    | 13654 | -0.56 | -0.27 | -0.45 | 0.30  | -0.04 | -0.34 | -0.68 | -0.49 | -0.34 | -1.28 | -0.07 | -1.51 |
| JMID7        | 16408  | NM_00114632  | 13655 | -1.01 | -0.20 | -0.25 | 0.42  | 1.26  | 1.83  | -0.32 | -0.33 | -0.86 | -0.56 | 3.49  | -1.51 |
| ARGHGIG      | 98     | NM_00114632  | 13656 | 0.14  | -0.38 | -0.17 | 0.14  | 0.04  | 0.14  | 0.04  | 0.14  | 0.04  | 0.41  | 2.42  | -1.51 |
| LOC42726     | 442726 | NM_001126311 | 13657 | 0.22  | -0.51 | -0.33 | 1.01  | 0.23  | 2.41  | -0.60 | -0.25 | -0.67 | -0.62 | 3.65  | -1.51 |
| FL2C103      | 54662  | NM_018201    | 13658 | -0.01 | 0.93  | -0.86 | 1.00  | 1.06  | 1.04  | -0.52 | -0.03 | -0.96 | 0.08  | 1.30  | -1.51 |
| FL10260      | 55105  | NM_018201    | 13659 | -0.21 | -0.36 | -0.46 | -0.16 | -0.36 | -0.46 | -0.16 | -0.36 | -0.46 | -0.16 | -0.36 | -1.51 |
| SMARCA4      | 6597   | NM_003072    | 13660 | -0.75 | -1.15 | -1.47 | -0.27 | -0.50 | -0.67 | -0.15 | -0.68 | -0.68 | -2.36 | -0.90 | -1.51 |
| CYP26A1      | 56603  | NM_019885    | 13661 | -1.07 | -1.03 | -0.82 | -1.60 | -1.04 | -0.88 | -0.42 | -0.52 | -0.57 | -1.92 | -3.02 | -1.51 |
| MGCC251      | 84336  | NM_012336    | 13662 | -0.21 | 0.04  | -0.47 | 0.29  | 0.40  | 0.80  | -0.40 | -0.40 | -0.40 | -0.64 | 1.45  | -1.51 |
| TERF1        | 7013   | NM_003218    | 13663 | -0.13 | 0.25  | -0.11 | 1.62  | -0.03 | 0.20  | -0.74 | -0.39 | -0.37 | -0.49 | 1.79  | -1.51 |
| MORF4L2      | 9643   | NM_012286    | 13664 | -0.94 | -0.22 | -0.91 | -0.61 | -0.16 | -0.36 | -0.69 | -0.07 | -0.75 | -2.08 | -1.12 | -1.51 |
| C7orf6       | 219385 | NM_152703    | 13665 | -0.25 | -0.66 | -1.07 | 1.25  | 0.65  | 1.73  | -0.31 | -0.19 | -1.02 | -1.37 | 3.63  | -1.51 |
| FL2C62       | 15204  | NM_006176    | 13666 | -0.24 | 0.23  | -0.61 | 0.82  | -0.21 | 0.61  | -0.47 | -0.65 | -0.49 | -0.40 | 0.29  | -1.51 |
| ZFXH18       | 9839   | NM_014795    | 13667 | -0.33 | -0.10 | -0.32 | 0.22  | 0.21  | 0.96  | -0.59 | -0.34 | -0.59 | -0.74 | 1.40  | -1.51 |
| CSORF23      | 65463  | NM_001039112 | 13668 | -1.02 | -0.82 | -0.42 | 0.82  | 0.29  | 0.56  | -0.42 | -0.76 | -0.33 | -0.52 | 1.67  | -1.51 |
| RNAH12       | 228    | NM_001039112 | 13669 | -0.25 | 0.26  | -0.26 | 0.18  | 0.26  | 0.18  | -0.25 | -0.26 | -0.26 | -0.18 | 0.26  | -1.51 |
| DEHAL1       | 38934  | NM_203395    | 13670 | -1.16 | -0.32 | 0.27  | 1.17  | 0.50  | 0.47  | -1.11 | -0.24 | -0.16 | -1.21 | 2.14  | -1.51 |
| FL23387      | 16145  | NM_182326    | 13671 | -1.17 | -0.14 | -0.27 | 1.09  | 2.23  | 0.96  | -0.37 | -0.71 | -0.44 | -0.30 | 4.28  | -1.52 |
| LOC133026    | 13670  | NM_182326    | 13672 | -1.08 | -0.84 | -0.95 | -1.08 | -0.84 | -0.95 | -1.08 | -0.84 | -0.95 | -1.08 | -0.84 | -1.52 |
| SLSAR1       | 9368   | NM_004252    | 13673 | 0.75  | 0.97  | -0.60 | 0.43  | 0.07  | 0.22  | 0.00  | -0.77 | -0.74 | -0.72 | 0.52  | -1.52 |
| LOC284434    | 284434 | NM_001007525 | 13674 | -1.15 | -0.75 | -0.11 | 0.96  | 0.59  | 1.22  | -0.37 | -0.73 | -0.42 | -1.01 | 2.76  | -1.52 |
| PCDH8        | 56104  | NM_012995    | 13675 | -1.08 | -1.01 | -1.54 | -1.00 | -1.28 | -1.42 | -0.38 | -0.49 | -0.65 | -1.63 | -4.20 | -1.52 |
| MGD          | 894    | NM_006095    | 13676 | -0.17 | -0.38 | -0.24 | -0.14 | -0.38 | -0.24 | -0.14 | -0.38 | -0.24 | -0.44 | 0.20  | -1.52 |
| MRL23        | 6150   | NM_001234    | 13677 | -1.03 | -0.65 | -0.51 | 0.34  | 0.52  | 0.16  | -0.95 | -0.46 | -0.11 | -2.18 | 0.70  | -1.52 |
| ADRA28       | 151    | NM_000682    | 13678 | -0.52 | -0.88 | -0.99 | 0.16  | 0.25  | 0.43  | -0.37 | -0.48 | -0.67 | -2.38 | 0.84  | -1.52 |
| CACNB3       | 10368  | NM_003239    | 13679 | -0.71 | -0.56 | -1.60 | -0.16 | -0.56 | -1.60 | -0.16 | -0.56 | -1.60 | -0.16 | -0.56 | -1.52 |
| GYS2         | 2998   | NM_012957    | 13680 | -1.00 | -0.85 | 1.28  | -     |       |       |       |       |       |       |       |       |

|              |        |             |       |       |       |       |       |       |       |       |       |       |       |       |       |
|--------------|--------|-------------|-------|-------|-------|-------|-------|-------|-------|-------|-------|-------|-------|-------|-------|
| MCC13204     | 83695  | NM_031465   | 13763 | -0.14 | -0.62 | -0.65 | 0.61  | 1.28  | 0.37  | -0.09 | -0.81 | -0.60 | -1.41 | 2.27  | -1.55 |
| SD606F6      | 5019   | NM_021121   | 13764 | -0.31 | -0.78 | -0.85 | 0.11  | 1.88  | -0.37 | 0.03  | -1.01 | -0.81 | -1.96 | 0.78  | -1.55 |
| POKH         | 8050   | NM_003477   | 13765 | 0.04  | 0.32  | -0.74 | 1.36  | 0.17  | 2.21  | 0.42  | -0.28 | -0.85 | -1.10 | 3.73  | -1.55 |
| WOR26        | 80232  | NM_025160   | 13766 | -0.55 | -0.64 | -1.11 | 0.13  | 0.35  | 1.23  | 0.29  | -0.73 | -1.11 | -2.29 | 1.71  | -1.55 |
| MGC5576      | 79932  | NM_024556   | 13767 | 0.05  | 0.38  | 0.03  | 2.05  | 1.82  | 1.01  | -0.63 | -0.54 | -0.38 | 0.45  | 4.89  | -1.55 |
| SCOR5        | 34525  | NM_021335   | 13768 | 0.23  | 0.54  | -0.24 | 0.52  | 0.85  | 1.62  | -0.14 | -0.65 | 0.78  | 0.56  | 3.31  | -1.55 |
| ARHGAP4      | 393    | NM_001666   | 13769 | 0.06  | 1.09  | -0.25 | 0.56  | 0.78  | 0.72  | 0.12  | -0.99 | -0.68 | -1.28 | 2.07  | -1.55 |
| PEP112L      | 5138   | NM_004564   | 13770 | -0.86 | -1.19 | -1.25 | -0.87 | -0.78 | -0.60 | -0.25 | -0.67 | -0.63 | -3.30 | -2.25 | -1.55 |
| GLC51454     | 5124   | NM_022851   | 13771 | 0.06  | 0.42  | -0.47 | 0.62  | 0.52  | 1.22  | 0.17  | -0.10 | -0.11 | 0.01  | 3.36  | -1.55 |
| EBPL         | 84650  | NM_023565   | 13772 | 0.04  | 0.12  | -0.11 | 0.26  | 0.70  | 0.61  | -0.49 | -0.38 | -0.69 | 0.06  | 1.57  | -1.55 |
| GRP120       | 338557 | NM_181745   | 13773 | 0.72  | 0.36  | 0.42  | 2.81  | 1.42  | 1.60  | -0.68 | -0.46 | -0.41 | 1.50  | 5.83  | -1.55 |
| LOC175487028 | 127564 | NM_021748   | 13774 | 0.25  | 0.72  | -0.36 | 1.15  | 1.05  | 0.88  | 0.74  | -0.36 | -0.42 | 0.47  | 2.70  | -1.55 |
| CL60NF3      | 790    | NM_001214   | 13775 | 0.02  | 0.73  | -0.77 | 1.26  | 0.73  | 1.25  | 0.30  | -0.92 | -0.93 | -1.48 | 2.28  | -1.55 |
| GVG2         | 8908   | NM_003918   | 13776 | -0.88 | -0.57 | -0.05 | 0.05  | 0.14  | 0.90  | -0.64 | -0.58 | -0.34 | -1.50 | 1.10  | -1.55 |
| CAL3         | 37767  | NM_198584   | 13777 | -0.16 | 0.01  | 0.82  | 0.07  | 1.44  | 0.84  | -0.64 | -0.65 | -0.27 | 0.66  | 3.15  | -1.55 |
| SEPEL1       | 64172  | NM_022853   | 13778 | -0.53 | 0.22  | -0.34 | -0.20 | 0.36  | 0.12  | -0.60 | -0.47 | -0.49 | -1.10 | 0.04  | -1.55 |
| TNF          | 7124   | NM_000594   | 13779 | 0.26  | -0.64 | -0.34 | -0.22 | -0.05 | 0.35  | -0.09 | -0.79 | -0.67 | -0.72 | 0.08  | -1.55 |
| ASFL3        | 56676  | NM_020646   | 13780 | -0.34 | -0.67 | -0.87 | 0.21  | -0.73 | -0.76 | -0.53 | -0.44 | -0.59 | -1.88 | -1.29 | -1.55 |
| VNA3         | 55350  | NM_018399   | 13781 | 0.25  | 0.41  | -0.77 | 0.74  | 1.79  | 2.75  | 0.25  | -0.66 | -1.14 | -1.02 | 5.28  | -1.55 |
| PACSN3       | 29763  | NM_016223   | 13782 | 0.95  | -0.17 | -0.56 | 1.02  | 1.08  | 1.01  | 0.18  | -0.76 | -0.97 | 0.21  | 3.12  | -1.55 |
| NEURO04      | 58138  | NM_021191   | 13783 | -0.21 | -0.58 | -0.80 | 0.77  | 0.46  | -0.42 | -0.45 | -0.75 | -0.35 | -1.59 | 0.81  | -1.56 |
| LZC          | 84328  | NM_022368   | 13784 | 0.77  | -0.64 | -1.07 | -0.01 | 0.27  | 0.83  | 0.00  | -0.78 | -0.77 | -0.95 | 1.09  | -1.56 |
| REPS1        | 85021  | NM_031922   | 13785 | 0.53  | 0.55  | 1.04  | 1.85  | 1.37  | 0.57  | -0.77 | -0.82 | 0.04  | 1.03  | 3.79  | -1.56 |
| PANK2        | 53354  | NM_138316   | 13786 | -0.45 | -0.19 | -0.47 | 1.45  | -0.07 | 0.49  | -0.77 | -0.19 | -0.60 | -1.11 | 1.88  | -1.56 |
| COG8         | 84842  | NM_012382   | 13787 | -0.85 | -0.93 | 0.31  | 2.48  | 2.30  | 1.00  | -1.03 | -1.17 | 0.64  | -1.47 | 5.78  | -1.56 |
| GALNAKT2     | 55454  | NM_018900   | 13788 | -0.52 | 0.00  | -0.65 | 1.42  | 1.39  | 1.71  | -0.84 | 0.09  | 0.80  | -1.17 | 4.53  | -1.56 |
| TTD          | 9499   | NM_006790   | 13789 | -0.64 | -0.44 | -0.67 | -0.41 | 0.22  | 1.00  | -0.34 | -0.44 | -0.77 | -1.75 | 0.90  | -1.56 |
| MD           | 7499   | NM_175569   | 13790 | 0.40  | -0.81 | -0.20 | 1.65  | 1.34  | 0.70  | -0.42 | -0.59 | -0.54 | -0.63 | 3.68  | -1.56 |
| IZ213751     | 9237   | NM_01017172 | 13791 | 0.85  | 0.71  | -1.13 | 0.85  | 0.71  | -1.13 | 0.85  | 0.71  | -1.13 | 0.85  | 0.71  | -1.13 |
| MNBL2        | 10150  | NM_027304   | 13792 | -1.02 | -0.54 | -0.76 | -0.80 | -0.37 | -0.24 | -0.88 | -0.56 | -1.12 | -2.32 | -1.42 | -1.56 |
| POLR3B       | 171568 | NM_138338   | 13793 | -0.95 | -0.53 | -0.30 | 0.82  | 0.74  | 1.25  | -1.05 | -0.07 | -0.43 | -1.77 | 2.82  | -1.56 |
| FBXK         | 27335  | NM_021324   | 13794 | -0.31 | -0.01 | -0.34 | 0.69  | -0.60 | -0.59 | -0.62 | -0.59 | -0.62 | -0.97 | 1.73  | -1.56 |
| LCN9         | 392399 | NM_00101576 | 13795 | -0.92 | -0.67 | -0.65 | -0.48 | -0.29 | -0.83 | -0.76 | -1.00 | -1.20 | -0.97 | 1.02  | -1.56 |
| ADCV5        | 111    | NM_183357   | 13796 | -1.09 | -0.63 | -0.41 | -0.47 | -0.28 | -0.65 | -0.97 | -0.58 | -0.02 | -2.13 | -1.41 | -1.56 |
| RSGRP8       | 25798  | NM_170672   | 13797 | -0.45 | 0.06  | -0.36 | 2.85  | 3.30  | 4.23  | -0.46 | -0.64 | -0.46 | -0.69 | 10.38 | -1.56 |
| CDORF151     | 140893 | NM_080813   | 13798 | -0.68 | -1.22 | -0.40 | 0.28  | 0.63  | 1.22  | -0.28 | -0.62 | -1.40 | -2.80 | 0.65  | -1.56 |
| CHRNA4       | 1137   | NM_000744   | 13799 | -0.05 | 0.26  | 0.24  | 0.80  | 0.20  | 0.85  | -0.77 | -0.40 | -0.39 | 0.46  | 1.85  | -1.56 |
| YTHDF1       | 54915  | NM_017798   | 13800 | 0.30  | 0.34  | 1.39  | 1.83  | 2.15  | 2.66  | -0.60 | -0.67 | -0.29 | 2.03  | 6.64  | -1.56 |
| IG           | 5340   | NM_000391   | 13801 | 0.01  | 0.73  | 0.19  | 0.14  | 0.16  | 0.14  | -0.16 | -0.16 | -0.14 | 0.85  | 1.32  | -1.56 |
| CIORF7       | 92703  | NM_138391   | 13802 | -0.40 | -0.57 | -1.06 | -0.08 | 0.08  | 0.45  | -0.46 | -0.34 | -0.76 | -2.03 | 4.05  | -1.56 |
| CHPF         | 79486  | NM_024336   | 13803 | 0.37  | 0.03  | -0.64 | 1.08  | 0.54  | 0.08  | -0.47 | -0.23 | -0.86 | -0.24 | 1.70  | -1.56 |
| ORH1         | 23796  | NM_020325   | 13804 | 0.42  | 0.67  | 0.74  | 0.74  | 0.74  | 0.74  | 0.74  | 0.74  | 0.74  | 0.74  | 0.74  | 0.74  |
| CYP2E1       | 34046  | NM_183374   | 13805 | -1.01 | 0.46  | 1.10  | 0.24  | 1.06  | 0.89  | -1.08 | -0.77 | 0.28  | -1.37 | 2.17  | -1.56 |
| CGI-51       | 25813  | NM_015380   | 13806 | -0.47 | -0.66 | -0.83 | -0.04 | 0.36  | 0.44  | -0.14 | -0.87 | -0.55 | -1.96 | 0.79  | -1.56 |
| MGC3234      | 66605  | NM_023947   | 13807 | -0.97 | -0.35 | -0.90 | -0.47 | -0.69 | 0.28  | -0.64 | -0.04 | -0.88 | -2.22 | -0.87 | -1.56 |
| MGA0316      | 79932  | NM_024874   | 13808 | 0.23  | 0.40  | 0.31  | 1.40  | 0.70  | 0.41  | -0.70 | -0.41 | -0.70 | 0.41  | 1.63  | -1.56 |
| MPOL1        | 145282 | NM_138731   | 13809 | -0.73 | -0.07 | 0.71  | 1.47  | 1.90  | 2.56  | -0.91 | -0.21 | -0.44 | -0.88 | 5.93  | -1.56 |
| PHF6         | 84295  | NM_032335   | 13810 | -0.54 | -0.74 | -0.99 | 1.41  | 0.64  | 1.61  | -0.52 | -1.11 | -0.93 | -2.27 | 3.67  | -1.56 |
| FBP5         | 27323  | NM_00100327 | 13811 | -0.77 | -0.79 | -0.64 | -0.69 | -0.65 | -0.69 | -0.65 | -0.69 | -0.65 | -0.69 | 1.40  | -1.56 |
| PRAMEF8      | 391002 | NM_00112276 | 13812 | 0.49  | 0.49  | 1.42  | 1.72  | 2.63  | 1.46  | -0.45 | -0.76 | -0.33 | 2.39  | 5.81  | -1.56 |
| TSPAN9       | 10867  | NM_006675   | 13813 | -0.67 | -0.15 | -0.60 | 1.66  | 0.50  | 0.44  | -0.12 | -0.62 | -0.83 | -0.08 | 2.62  | -1.56 |
| ERAS         | 3266   | NM_081532   | 13814 | -0.60 | -0.23 | -0.75 | -0.75 | -0.66 | -0.63 | -0.37 | -0.75 | -0.66 | -2.00 | -1.84 | -1.57 |
| ADORA1       | 134    | NM_000674   | 13815 | -1.15 | -1.28 | -1.35 | -1.25 | -1.31 | -0.75 | -0.18 | -0.57 | -0.81 | -3.79 | 3.31  | -1.57 |
| MGC110       | 89790  | NM_033130   | 13816 | 0.29  | -0.21 | -0.66 | 0.46  | 0.75  | 0.41  | 0.10  | -0.84 | -0.83 | -0.59 | 1.62  | -1.57 |
| MGC33486     | 256472 | NM_153206   | 13817 | -1.01 | -0.15 | -0.39 | 0.58  | 0.51  | 0.51  | -0.76 | -1.16 | -0.65 | -0.63 | 1.60  | -1.57 |
| URASH1A      | 53147  | NM_00101895 | 13818 | -0.16 | 0.33  | -0.51 | 0.17  | 0.52  | 0.86  | -0.17 | -0.52 | 0.86  | -0.20 | 2.46  | -1.57 |
| POSTN        | 10631  | NM_006475   | 13819 | -0.70 | -1.31 | 0.88  | -0.09 | 2.71  | 1.85  | -0.21 | -1.25 | -1.11 | -1.62 | 4.47  | -1.57 |
| UTG211       | 10720  | NM_001073   | 13820 | -0.20 | -0.22 | -0.51 | 3.04  | 2.43  | 1.80  | -0.37 | -0.42 | -0.78 | -0.09 | 7.26  | -1.57 |
| FOXC2        | 9434   | NM_033260   | 13821 | 0.81  | 0.28  | 0.70  | 0.73  | 0.73  | 0.73  | 0.73  | 0.73  | 0.73  | 0.73  | 0.73  | 0.73  |
| H2E          | 50717  | NM_015726   | 13822 | -0.46 | -0.23 | -0.14 | -0.25 | -0.22 | 0.13  | -0.63 | -0.46 | -0.48 | -0.82 | 0.34  | -1.57 |
| FLJ4050      | 79927  | NM_024869   | 13823 | -0.63 | -0.53 | -0.79 | -0.18 | -0.42 | -0.35 | -0.34 | -0.61 | -0.61 | -0.95 | 0.95  | -1.57 |
| TNCF27       | 7770   | NM_023490   | 13824 | -0.48 | -0.53 | -0.62 | -0.50 | -0.52 | -0.52 | -0.52 | -0.52 | -0.52 | -0.80 | 0.50  | -1.57 |
| MTCH2        | 23788  | NM_014342   | 13825 | 0.14  | -0.45 | -0.93 | 0.44  | 0.08  | 0.67  | -0.64 | -0.20 | -0.73 | -1.15 | 1.19  | -1.57 |
| CDK7         | 1022   | NM_001799   | 13826 | 0.14  | -0.69 | -0.60 | -0.09 | -0.25 | -0.13 | -0.29 | -0.68 | -0.60 | -1.15 | -0.46 | -1.57 |
| DKFZ762007   | 55529  | NM_018710   | 13827 | -1.17 | -0.98 | -0.93 | 0.25  | 0.78  | 0.66  | -0.24 | -0.74 | -0.58 | -1.99 | 1.69  | -1.57 |
| TRBEV1       | 732    | NM_00103288 | 13828 | -0.24 | 0.45  | -0.58 | 0.24  | 0.16  | 0.29  | -0.68 | -0.62 | -1.21 | -0.67 | 0.50  | -1.57 |
| RPL37A       | 6168   | NM_000998   | 13829 | -1.43 | -1.52 | -1.94 | -2.47 | -2.93 | -2.14 | -0.43 | -0.30 | -0.84 | -4.89 | -7.54 | -1.57 |
| ERBP         | 30836  | NM_014977   | 13830 | -1.62 | -1.49 | -1.17 | -1.48 | -1.92 | -1.03 | -0.51 | -0.40 | -0.66 | -4.27 | -4.43 | -1.57 |
| TRIP5        | 7748   | NM_0010752  | 13831 | -0.21 | 0.63  | -0.67 | 0.67  | 0.67  | 0.67  | -0.67 | -0.67 | -0.67 | -1.45 | 1.27  | -1.57 |
| CAMKK2       | 10645  | NM_172215   | 13832 | -0.71 | -0.41 | -0.66 | 0.44  | 0.13  | -0.20 | -0.79 | -0.43 | -0.36 | -1.78 | 0.36  | -1.57 |
| RATUN        | 23180  | NM_015150   | 13833 | -0.26 | -0.53 | -0.61 | 0.56  | 0.02  | 0.12  | -0.46 | -0.63 | -0.48 | -1.40 | 0.71  | -1.57 |
| LOC223075    | 22307  | NM_021420   | 13834 | -0.48 | -0.65 | -0.60 | -0.70 | -0.70 | -0.70 | -0.70 | -0.70 | -0.70 | -1.14 | 0.88  | -1.57 |
| MTHF5        | 10588  | NM_006441   | 13835 | 0.95  | -1.13 | -0.87 | 0.13  | -0.47 | -0.51 | -0.39 | -0.74 | -0.44 | -2.85 | 0.85  | -1.57 |
| R1D4         | 712    | NM_015991   | 13836 | -0.88 | -1.01 | -0.97 | -1.04 | -0.46 | -0.42 | -0.79 | -0.42 | -0.36 | -2.85 | -1.92 | -1.57 |
| RP14         | 9045   | NM_003973   | 13837 | -1.84 | -1.70 | -1.63 | -2.66 | -2.12 | -2.69 | 0.30  | -0.99 | -0.89 | -5.18 | -7.67 | -1.57 |
| RP2          | 7174   | NM_001291   | 13838 | -0.32 | 0.16  | 0.12  | 0.17  | 0.15  | 0.17  | -0.48 | -0.24 | -0.66 | -0.75 | 3.39  | -1.57 |
| ICAM3        | 3385   | NM_002162   | 13839 | -0.79 | -0.59 | -0.19 | 0.76  | 1.85  | 0.84  | -0.79 | -0.76 | -0.03 | -1.15 | 3.45  | -1.57 |
| MGA2         | 4101   | NM_175742   | 13840 | -0.78 | -0.55 | -0.18 | 0.26  | 0.36  | 0.00  | -0.62 | -0.63 | -0.32 | -1.51 | 0.62  | -1.57 |
| TRM          | 50826  | NM_016388   | 13841 | -0.51 | -0.50 | -0.49 | -0.51 | -0.50 | -0.49 | -0.51 | -0.50 | -0.49 | -0.46 | 1.63  | -1.57 |
| CDORF10D5    | 15843  | NM_198841   | 13842 | -0.07 | -0.14 | -0.03 | -0.27 | 0.89  | 0.56  | -0.27 | -0.66 | -0.64 | -0.10 | 1.18  |       |

|           |        |             |       |       |       |       |       |       |       |       |       |       |       |       |       |       |
|-----------|--------|-------------|-------|-------|-------|-------|-------|-------|-------|-------|-------|-------|-------|-------|-------|-------|
| ITC       | 3702   | NM_005546   | 19925 | 0.25  | -0.19 | 0.19  | 1.31  | 0.62  | 2.56  | -0.26 | -0.64 | -0.69 | 0.25  | 4.49  | -1.69 |       |
| MGC4504   | 9182   | NM_005497   | 19926 | -0.28 | -0.21 | -1.05 | -0.41 | 0.07  | -0.26 | -0.10 | -0.67 | -0.11 | -2.38 | -0.41 | -1.68 |       |
| LOC553483 | 653483 | NM_00104208 | 19927 | 0.90  | 0.60  | -0.05 | -0.02 | -0.35 | -0.22 | -0.83 | -0.25 | -0.23 | 2.15  | 0.59  | -1.60 |       |
| DAF       | 1604   | NM_000574   | 19928 | -0.51 | -0.13 | -0.32 | 0.78  | 1.46  | 1.04  | -0.66 | -0.38 | -0.57 | -0.95 | 3.28  | -1.60 |       |
| USP48     | 84136  | NM_00132730 | 19929 | -0.20 | -0.27 | 0.65  | 0.95  | 0.88  | 1.88  | -0.65 | -0.53 | -0.42 | 0.18  | 3.71  | -1.60 |       |
| USP44     | 84137  | NM_00132747 | 19930 | 0.28  | 0.15  | 0.20  | 0.10  | 0.40  | 0.35  | -0.50 | -0.43 | -0.15 | 1.73  | 1.60  | -1.60 |       |
| WFC011    | 259239 | NM_147197   | 19931 | -0.50 | -0.72 | -0.35 | 0.56  | 0.89  | 0.97  | -0.55 | -0.77 | -0.28 | -1.57 | 2.42  | -1.60 |       |
| FAM388    | 63895  | NM_022088   | 19932 | -0.86 | 0.09  | -0.54 | -0.86 | 1.17  | 1.53  | -0.83 | -0.36 | -0.41 | -1.31 | 3.56  | -1.60 |       |
| PCWH12    | 5613   | NM_031912   | 19933 | -0.71 | -0.19 | -0.87 | -0.71 | 1.09  | 0.53  | -0.71 | -0.19 | -0.87 | -0.41 | 1.39  | -1.61 |       |
| LOC155100 | 155100 | NM_00102866 | 19934 | -0.88 | -0.26 | -0.50 | -0.85 | -0.31 | -0.41 | -0.74 | -0.38 | -0.49 | -1.75 | -1.56 | -1.60 |       |
| CCORP97   | 80129  | NM_025059   | 19935 | -0.55 | -0.71 | -0.42 | -0.14 | -0.55 | 0.30  | -0.61 | -0.61 | -0.39 | -1.67 | -0.39 | -1.60 |       |
| W9H48     | 759    | NM_139323   | 19936 | 0.70  | -0.54 | -0.13 | 0.56  | 0.25  | 0.93  | -0.15 | -0.13 | -0.15 | 0.61  | 3.65  | -1.60 |       |
| CANT1     | 124583 | NM_138793   | 19937 | 0.06  | 0.03  | -0.21 | 2.30  | 3.03  | 2.70  | -0.17 | -0.65 | -0.79 | -0.24 | 8.04  | -1.60 |       |
| FLU43965  | 389206 | NM_207406   | 19938 | -1.06 | -0.66 | -0.25 | 0.81  | 0.12  | -0.11 | -0.86 | -0.48 | -0.26 | -1.96 | 0.83  | -1.61 |       |
| LOC205522 | 205522 | NM_182540   | 19939 | -1.04 | -0.33 | 0.13  | 2.29  | 2.62  | 3.15  | -0.07 | -0.68 | -0.86 | 0.83  | 8.06  | -1.61 |       |
| FLU11295  | 121274 | NM_152320   | 19940 | -0.83 | -0.95 | -0.47 | -0.61 | -0.83 | -0.23 | -0.47 | -0.73 | -0.40 | -2.24 | 1.67  | -1.61 |       |
| CCDC5     | 890    | NM_001254   | 19941 | -0.97 | -1.18 | -0.80 | -1.02 | -0.02 | -0.28 | -0.92 | -0.95 | -1.03 | 0.38  | -2.94 | -1.21 | -1.61 |
| SUC7A13   | 157724 | NM_138817   | 19942 | -0.04 | 0.14  | -0.35 | 1.06  | 0.86  | 1.08  | -0.56 | -0.31 | -0.74 | -0.25 | 3.00  | -1.61 |       |
| SYNCO21UN | 81460  | NM_020786   | 19943 | -0.84 | -0.54 | -0.96 | 0.03  | -0.47 | -0.15 | -0.73 | -0.16 | -0.73 | -2.24 | 0.59  | -1.61 |       |
| ITPR2     | 3709   | NM_002223   | 19944 | -0.21 | 0.23  | -0.06 | 0.40  | 0.73  | 0.42  | -0.69 | -0.44 | -0.48 | -0.04 | 1.55  | -1.61 |       |
| FLU36208  | 283948 | NM_176677   | 19945 | 0.52  | -0.21 | -0.37 | 1.90  | -0.21 | 0.47  | -0.63 | -0.40 | -0.57 | -0.06 | 2.16  | -1.61 |       |
| DP94      | 55211  | NM_018189   | 19946 | -0.92 | -0.63 | 0.15  | -0.04 | 0.43  | 0.84  | -0.78 | -0.72 | -0.11 | -1.38 | 1.22  | -1.61 |       |
| EIF2C3    | 192669 | NM_177422   | 19947 | -0.52 | -0.50 | 0.01  | 0.65  | 0.66  | 0.76  | -0.67 | -0.44 | -0.50 | 1.01  | 2.06  | -1.61 |       |
| S100A2    | 6273   | NM_005978   | 19948 | -0.26 | -0.30 | -0.58 | 0.05  | 0.47  | 0.94  | -0.21 | -0.62 | -0.78 | -1.15 | 1.46  | -1.61 |       |
| ZNF330    | 27309  | NM_014487   | 19949 | -0.58 | -0.08 | -0.59 | 0.02  | -0.19 | 0.38  | -0.63 | -0.32 | -0.66 | -1.26 | 0.21  | -1.61 |       |
| CR11      | 1072   | NM_005027   | 19950 | -0.02 | 0.54  | -0.60 | 0.17  | 0.34  | 1.10  | -0.34 | -0.27 | -1.00 | -0.08 | 1.71  | -1.61 |       |
| EYA2      | 2139   | NM_172110   | 19951 | -0.50 | -0.86 | -0.25 | 1.55  | -0.11 | 1.39  | -0.46 | -0.48 | -0.68 | -1.60 | 2.83  | -1.61 |       |
| RIFI1     | 6016   | NM_006912   | 19952 | -0.20 | -0.19 | -0.32 | 1.11  | 0.65  | 1.09  | -0.73 | -0.36 | -0.52 | -0.71 | 3.05  | -1.61 |       |
| NRMG1     | 33983  | NM_178339   | 19953 | 1.91  | 1.59  | 1.19  | 1.12  | 1.59  | 1.02  | -1.12 | -1.12 | -1.18 | 1.18  | 4.95  | -1.61 |       |
| FLU1100   | 55818  | NM_018433   | 19954 | 0.06  | 0.14  | -0.14 | 0.54  | 0.59  | 0.39  | -0.67 | -0.50 | -0.44 | -0.22 | 1.53  | -1.61 |       |
| ZNF611    | 81856  | NM_030972   | 19955 | -0.87 | 1.39  | -0.27 | 2.06  | 2.31  | 2.46  | -0.49 | -0.31 | -0.81 | -1.99 | 6.83  | -1.61 |       |
| S10R5     | 687    | NM_133640   | 19956 | -1.15 | -0.98 | -1.39 | -0.22 | -1.14 | -0.66 | -1.22 | -1.14 | -0.66 | -3.52 | -4.80 | -1.61 |       |
| CO151     | 977    | NM_139303   | 19957 | -0.81 | -0.90 | -1.17 | -0.69 | -0.62 | -0.73 | -0.39 | -0.45 | -0.77 | -2.80 | 0.64  | -1.61 |       |
| ZNF436    | 80818  | NM_030634   | 19958 | 1.36  | 0.78  | -0.25 | 2.85  | 0.88  | 1.81  | -0.36 | -0.45 | -0.80 | -1.89 | 5.54  | -1.61 |       |
| GANAB     | 23159  | NM_138334   | 19959 | -0.78 | -1.03 | -0.83 | -0.32 | -0.50 | -0.82 | -0.73 | -0.87 | -0.02 | -2.63 | -1.84 | -1.61 |       |
| SCD3      | 3669   | NM_001201   | 19960 | 0.46  | -0.70 | -0.50 | 0.48  | -0.40 | 0.36  | -0.43 | -0.40 | -0.43 | -1.66 | 0.83  | -1.61 |       |
| LC6EA     | 448835 | NM_00112800 | 19961 | -0.62 | -0.90 | -0.96 | 0.16  | 0.51  | -0.05 | -0.07 | -0.88 | -0.67 | -2.48 | 0.63  | -1.61 |       |
| CCORF6    | 10141  | NM_005750   | 19962 | -0.59 | -0.09 | -0.87 | 0.26  | 0.42  | 0.38  | -0.52 | -0.26 | -0.83 | -1.55 | 1.04  | -1.61 |       |
| MARS      | 414    | NM_004990   | 19963 | -0.88 | -0.88 | -0.61 | 0.26  | 0.40  | 0.49  | -0.30 | -0.40 | -0.49 | -1.48 | 2.05  | -1.61 |       |
| FAM8A     | 171482 | NM_174951   | 19964 | -0.29 | 0.24  | -0.25 | 0.92  | 1.83  | 1.16  | -0.31 | -0.65 | -0.66 | -0.29 | 3.91  | -1.62 |       |
| APF1      | 333    | NM_005166   | 19965 | -0.65 | -0.37 | -0.45 | -0.17 | 0.23  | 0.14  | -0.60 | -0.57 | -0.45 | -1.46 | 0.20  | -1.62 |       |
| RMT1      | 4081   | NM_001208   | 19966 | -0.84 | -0.36 | -0.88 | -0.44 | 0.38  | -0.44 | -0.68 | -0.38 | -0.44 | -2.41 | 0.21  | -1.62 |       |
| CLMN      | 79789  | NM_024734   | 19967 | 0.09  | 0.59  | 0.13  | 0.78  | 0.95  | 1.44  | -0.61 | -0.37 | -0.64 | -0.38 | 3.18  | -1.62 |       |
| NDFU53    | 4722   | NM_004551   | 19968 | -0.11 | -0.21 | -0.03 | 0.67  | 1.33  | 0.09  | -0.66 | -0.91 | -0.05 | -0.35 | 2.09  | -1.62 |       |
| YFP       | 6855   | NM_003179   | 19969 | -0.36 | -0.11 | -0.94 | 1.03  | 0.46  | 0.51  | -0.39 | -0.35 | -0.87 | -1.41 | 2.00  | -1.62 |       |
| IT155     | 11234  | NM_181508   | 19970 | 0.51  | 0.17  | 0.32  | 1.02  | 0.85  | 0.00  | -0.12 | -0.12 | -0.12 | 0.66  | 4.12  | -1.62 |       |
| OR10A6    | 390093 | NM_00100461 | 19971 | -0.79 | -0.55 | -0.67 | 1.37  | 1.28  | 0.96  | -0.09 | -0.84 | -0.87 | -0.43 | 3.60  | -1.62 |       |
| SOD10     | 6663   | NM_006941   | 19972 | -0.39 | -1.04 | -0.78 | -0.36 | -0.18 | -0.53 | -0.16 | -0.82 | -0.64 | -2.21 | -1.09 | -1.62 |       |
| BGAL213   | 8762   | NM_003779   | 19973 | -0.42 | -0.03 | -0.78 | 1.42  | 1.04  | 1.20  | -0.43 | -0.43 | -0.43 | -1.78 | 1.48  | -1.62 |       |
| LEP       | 3952   | NM_002230   | 19974 | -0.88 | -0.09 | -0.35 | 0.91  | 0.33  | 0.01  | -0.94 | -0.41 | -0.26 | -1.14 | 1.25  | -1.62 |       |
| OPCML     | 4978   | NM_002545   | 19975 | -0.27 | -0.55 | -0.69 | 0.41  | 0.60  | 0.77  | -0.26 | -0.70 | -0.66 | -1.51 | 1.78  | -1.62 |       |
| WNRG4     | 23856  | NM_001451   | 19976 | -1.41 | -1.67 | -1.67 | -1.41 | -1.67 | -1.67 | -1.41 | -1.67 | -1.67 | -4.55 | -4.42 | -1.62 |       |
| CMH2      | 264263 | NM_182553   | 19977 | 0.79  | 0.51  | 0.54  | 0.61  | 2.21  | 3.62  | 0.70  | -0.49 | -0.43 | 1.84  | 10.44 | -1.62 |       |
| SOHD      | 6392   | NM_003002   | 19978 | -0.31 | -0.34 | -0.97 | 2.02  | 0.63  | 1.46  | -0.65 | -0.28 | -0.69 | -1.62 | 4.11  | -1.62 |       |
| MDBK12C   | 148932 | NM_145279   | 19979 | -0.08 | -0.44 | -0.77 | 0.07  | -0.31 | 0.59  | -0.44 | -0.38 | -0.80 | -1.29 | 0.35  | -1.62 |       |
| SC3       | 2463   | NM_024022   | 19980 | -0.59 | -0.42 | -0.08 | 0.51  | 0.42  | 0.04  | -0.48 | -0.42 | -0.19 | -1.91 | 0.28  | -1.62 |       |
| SARMAC5   | 8467   | NM_003601   | 19981 | -0.61 | -0.15 | 0.10  | 1.37  | 1.28  | 0.72  | -0.77 | -0.59 | -0.26 | -0.66 | 3.37  | -1.62 |       |
| VPS41     | 27072  | NM_080631   | 19982 | -0.89 | -0.43 | -0.34 | -0.29 | 0.19  | 0.27  | -0.56 | -0.54 | -0.52 | -1.66 | 0.18  | -1.62 |       |
| FLU12681  | 64338  | NM_021773   | 19983 | -1.09 | -1.12 | -0.62 | -1.09 | -1.12 | -0.62 | -1.09 | -1.12 | -0.62 | -1.78 | 1.73  | -1.62 |       |
| LOC38773  | 338773 | NM_181724   | 19984 | -0.93 | -0.67 | -0.41 | 0.09  | 0.39  | 0.54  | -0.81 | -0.54 | -0.27 | -2.01 | -0.05 | -1.62 |       |
| HOKC13    | 3229   | NM_017410   | 19985 | -0.17 | -0.37 | -0.72 | 0.36  | -0.05 | -0.32 | -0.37 | -0.59 | -0.66 | -1.26 | 0.62  | -1.62 |       |
| LOC491    | 34938  | NM_001244   | 19986 | -0.49 | -0.39 | -0.46 | 1.46  | 1.72  | 0.69  | -0.68 | -0.43 | -0.68 | -0.24 | 3.87  | -1.62 |       |
| BGAL25    | 9334   | NM_004776   | 19987 | -0.47 | -0.47 | -0.42 | 0.62  | 0.65  | 0.38  | -0.45 | -0.60 | -0.57 | -1.37 | 1.65  | -1.62 |       |
| PHL8D2    | 90102  | NM_145753   | 19988 | -0.43 | -0.23 | -0.25 | -0.21 | 0.61  | 0.22  | -0.41 | -0.65 | -0.56 | -0.91 | 0.63  | -1.62 |       |
| FLU1439   | 80208  | NM_025137   | 19989 | -0.26 | -0.72 | -0.86 | 0.31  | 0.16  | 0.88  | 0.14  | -0.76 | -1.01 | -1.32 | 1.85  | -1.62 |       |
| TGFR1     | 709    | NM_003960   | 19990 | 0.22  | 0.66  | -0.46 | 0.74  | 0.62  | 0.48  | -0.74 | -0.40 | -0.74 | -1.48 | 2.44  | -1.62 |       |
| COL4A3    | 1285   | NM_031366   | 19991 | 0.29  | -0.59 | -0.94 | 0.84  | -0.18 | -0.17 | -0.31 | -0.59 | -0.72 | -1.24 | 0.48  | -1.62 |       |
| SUZC2A13  | 9390   | NM_004256   | 19992 | -0.78 | -0.92 | -0.78 | -1.00 | -0.70 | -0.38 | -0.36 | -0.71 | -0.56 | -2.49 | -2.05 | -1.62 |       |
| ITPR2     | 5116   | NM_005229   | 19993 | -0.54 | -0.79 | -0.54 | 0.80  | 0.74  | 0.66  | -0.54 | -0.79 | -0.54 | -1.80 | 0.23  | -1.62 |       |
| HBR2      | 11103  | NM_007043   | 19994 | -0.06 | -0.60 | -0.09 | 0.70  | 1.59  | 1.41  | -0.32 | -0.90 | -0.40 | -0.57 | 3.70  | -1.63 |       |
| COG7      | 91949  | NM_153603   | 19995 | -0.30 | -0.97 | -0.82 | -0.34 | 1.10  | 0.17  | 0.10  | -0.86 | -0.87 | -2.09 | -0.07 | -1.63 |       |
| NC04A     | 8031   | NM_004437   | 19996 | -0.88 | 0.21  | -1.07 | 1.41  | 1.07  | 1.89  | -0.88 | -0.21 | -1.07 | -3.03 | 3.07  | -1.63 |       |
| TSMG3     | 84676  | NM_032588   | 19997 | -0.83 | 0.73  | -0.43 | 1.82  | 1.73  | 1.65  | -0.86 | -1.00 | -0.66 | -0.60 | 5.20  | -1.63 |       |
| SPRY1     | 10252  | NM_199327   | 19998 | 0.53  | 0.33  | 0.28  | 1.12  | 0.47  | 1.84  | -0.15 | -0.57 | -0.91 | 1.75  | 2.23  | -1.63 |       |
| NFH2      | 7376   | NM_007121   | 19999 | 1.00  | 0.89  | 0.88  | 1.70  | 1.17  | 4.14  | -0.18 | -0.56 | -0.89 | 2.78  | 7.41  | -1.63 |       |
| THSD1     | 5900   | NM_199023   | 20000 | -0.26 | 0.85  | -0.30 | 0.43  | -0.60 | -0.13 | -0.67 | -0.13 | -1.41 | 0.88  | 0.63  | -1.63 |       |
| OCRL      | 4952   | NM_001587   | 20001 | -0.34 | -0.46 | 0.32  | 0.79  | 1.35  | 1.27  | -0.69 | -0.68 | -0.26 | -0.47 | 3.40  | -1.63 |       |
| LOC90367  | 90637  | NM_182491   | 20002 | -0.71 | 0.06  | -0.68 | 0.37  | 0.08  | 0.35  | -0.76 | -0.22 | -0.66 | -1.32 | 0.80  | -1.63 |       |
| MNTK1     | 4147   | NM_003583   | 20003 | 0.79  | 0.74  | 0.62  | 0.74  | 0.62  | 0.69  | -0.63 | -0.49 | -0.63 | -2.15 | 0.63  | -1.63 |       |
| FGF13     | 2258   | NM_033642   | 20004 | -0.38 | -0.67 | -0.26 | 0.56  | 1.13  | 0.18  | -0.68 | -0.82 | -1    |       |       |       |       |

|             |        |               |       |       |       |       |       |       |       |       |       |       |       |       |       |
|-------------|--------|---------------|-------|-------|-------|-------|-------|-------|-------|-------|-------|-------|-------|-------|-------|
| GAGE6       | 2578   | NM_001476     | 14087 | -0.24 | -0.38 | -0.58 | 0.19  | 0.45  | 0.24  | -0.49 | -0.46 | 0.71  | -1.20 | 0.88  | -1.66 |
| EPHE12      | 6680   | NM_024946     | 14088 | -0.64 | -0.38 | -0.48 | 0.17  | 0.74  | 1.04  | -0.85 | 0.06  | -0.84 | -1.80 | 1.46  | -1.64 |
| NDUFA10     | 4705   | NM_004544     | 14089 | 1.82  | -0.17 | -0.15 | 2.48  | 3.07  | 2.71  | -0.06 | -0.79 | -0.81 | 1.51  | 8.26  | -1.66 |
| NDUFS6      | 4726   | NM_004553     | 14090 | -0.55 | -0.11 | -0.82 | 0.94  | 0.25  | 0.39  | -0.54 | -0.32 | -0.80 | -1.48 | 1.58  | -1.66 |
| LOC382509   | 392509 | NM_0012012990 | 14091 | -0.51 | -0.42 | -1.08 | 0.13  | 0.41  | 0.69  | -0.36 | -0.58 | -0.73 | -2.01 | 1.23  | -1.67 |
| CPHE1       | 154    | NM_00920      | 14092 | 0.24  | 0.24  | 0.24  | 0.51  | 0.51  | 0.51  | -0.54 | -0.51 | 0.64  | 0.94  | 1.05  | -1.67 |
| PREX1       | 57380  | NM_002082     | 14093 | -0.72 | -1.00 | -0.22 | 1.81  | 1.21  | 1.84  | -0.49 | -0.54 | -0.63 | -1.04 | 0.47  | -1.67 |
| FLU3582     | 389649 | NM_207412     | 14094 | -0.19 | 0.60  | -0.17 | 2.81  | 1.10  | 2.50  | -0.78 | 0.13  | -1.01 | 0.24  | 6.41  | -1.67 |
| LOC4808703  | 348084 | NM_00106703   | 14095 | -0.17 | 0.26  | 0.33  | 0.81  | 1.32  | 0.79  | -0.26 | -0.15 | -0.19 | 0.22  | 3.51  | -1.67 |
| SMAD1       | 14096  | NM_00100388   | 14096 | -0.43 | -0.81 | -0.15 | 0.19  | -0.18 | 0.02  | -0.69 | -0.82 | -0.16 | -1.39 | 0.03  | -1.67 |
| CKCR3       | 2813   | NM_001504     | 14097 | -0.08 | -0.36 | -0.56 | 0.46  | 0.73  | 0.93  | -0.48 | -0.78 | -0.41 | -1.01 | 2.11  | -1.67 |
| SCD2        | 152579 | NM_001540     | 14098 | -0.28 | 0.28  | -0.07 | 1.32  | 1.25  | 0.79  | -0.88 | -0.67 | -0.73 | -0.06 | 3.31  | -1.67 |
| FLU2444     | 264518 | NM_152761     | 14099 | -0.52 | 0.68  | -0.26 | 1.04  | 0.48  | 0.81  | 0.66  | -0.67 | -0.33 | -1.45 | 2.34  | -1.67 |
| HSF2BP      | 11077  | NM_007031     | 14100 | -0.91 | 0.55  | 0.03  | 1.06  | 0.68  | 1.21  | -1.01 | -0.24 | -0.42 | -0.33 | 2.94  | -1.67 |
| MPD9B       | 4650   | NM_004145     | 14101 | -0.30 | 0.35  | 0.44  | 2.65  | 3.26  | 2.50  | -0.61 | -0.61 | -0.44 | 0.99  | 8.40  | -1.67 |
| ORH1        | 122762 | NM_001004717  | 14102 | -0.80 | -1.34 | -1.08 | -0.57 | 0.10  | -0.10 | -0.44 | -0.81 | 0.41  | 3.22  | 0.78  | -1.67 |
| GM2A        | 2760   | NM_000405     | 14103 | -1.03 | -1.18 | -1.20 | -1.59 | -1.27 | -1.23 | -0.56 | -0.47 | -0.65 | -3.42 | -4.08 | -1.67 |
| ZPVE16      | 9765   | NM_014733     | 14104 | -0.05 | 0.81  | 0.11  | 0.51  | 1.62  | 0.46  | -0.70 | -0.41 | -0.56 | 0.87  | 2.59  | -1.67 |
| TN1         | 7894   | NM_000289     | 14105 | -0.25 | -0.70 | -0.62 | 2.20  | 0.16  | 3.50  | -0.25 | -0.29 | -0.59 | -1.57 | 5.85  | -1.67 |
| FLU2494     | 79873  | NM_024815     | 14106 | -0.69 | 0.00  | -0.78 | 0.00  | 0.55  | 0.94  | -0.40 | -0.45 | -0.82 | -1.47 | 1.49  | -1.67 |
| DOX31       | 64794  | NM_138620     | 14107 | -0.24 | -0.15 | 1.57  | 3.39  | 3.09  | 0.70  | -0.94 | -1.07 | -0.33 | -1.19 | 7.18  | -1.67 |
| AAH15       | 389    | NM_001654     | 14108 | -0.83 | -0.33 | -0.31 | 0.15  | -0.50 | 0.83  | -0.70 | -0.43 | -0.54 | -1.47 | 0.48  | -1.67 |
| MGC4171     | 79153  | NM_001031718  | 14109 | -0.13 | 0.95  | -0.12 | 0.95  | 0.43  | 0.63  | -0.48 | -0.89 | -0.30 | 2.01  | 2.01  | -1.67 |
| MLH1        | 4292   | NM_000249     | 14110 | -0.79 | 0.00  | 0.11  | 0.31  | 0.21  | 0.49  | -0.87 | -0.34 | -0.47 | -0.67 | 1.01  | -1.88 |
| PNL         | 35497  | NM_181308     | 14111 | -0.43 | -0.08 | 0.55  | 1.78  | 0.87  | 1.54  | -0.54 | -0.58 | -0.56 | 0.90  | 4.19  | -1.88 |
| KLF2        | 10166  | NM_001670     | 14112 | -1.24 | -0.88 | -1.08 | -0.59 | -0.02 | -0.12 | 0.54  | -0.43 | 0.71  | -3.30 | -1.63 | -1.68 |
| A2U1        | 566    | NM_001700     | 14113 | -0.53 | -0.74 | -0.66 | -0.25 | 0.20  | 0.27  | -0.60 | -0.65 | -0.43 | -1.93 | 0.22  | -1.68 |
| AMPGA98     | 23779  | NM_181335     | 14114 | 0.86  | 0.38  | 0.92  | 1.75  | 2.16  | 2.37  | -0.38 | -0.70 | -0.60 | 2.16  | 6.27  | -1.68 |
| LOC401948   | 401948 | NM_001013802  | 14115 | -0.72 | -0.85 | -0.89 | -0.72 | -0.74 | -0.69 | -0.72 | -0.74 | -0.69 | -2.46 | 0.08  | -1.68 |
| MMMD        | 23531  | NM_012329     | 14116 | -0.25 | -0.52 | 0.22  | 1.32  | 0.77  | 1.57  | -0.38 | -0.54 | -0.75 | -0.05 | 3.67  | -1.68 |
| STARDA      | 134429 | NM_139164     | 14117 | -0.44 | -0.35 | -1.07 | -0.34 | -0.30 | 0.29  | -0.14 | -0.44 | -1.10 | -1.86 | -0.35 | -1.68 |
| LOC284013   | 284013 | NM_0012666    | 14118 | -0.28 | 0.25  | -0.29 | -0.18 | 0.25  | 0.27  | -0.15 | 0.19  | 2.27  | 0.23  | 4.81  | -1.68 |
| CD7E        | 80381  | NM_025240     | 14119 | -0.63 | 0.73  | 0.14  | 0.05  | 0.48  | 0.80  | -0.37 | -0.88 | -0.43 | -1.22 | 1.34  | -1.68 |
| PANK3       | 116337 | NM_025259     | 14120 | -1.24 | -0.54 | -0.41 | 0.73  | 0.32  | 0.57  | -0.70 | -0.39 | -0.59 | -1.19 | 1.63  | -1.68 |
| BCLA2B      | 65483  | NM_00109182   | 14121 | -0.90 | 0.11  | 0.84  | 1.38  | 2.78  | 2.00  | -0.17 | -0.94 | -0.56 | 2.86  | 6.16  | -1.68 |
| NEF3        | 474    | NM_000582     | 14122 | -0.37 | -0.72 | -0.09 | 0.60  | 0.72  | 0.65  | -0.63 | -0.78 | -0.62 | -1.00 | 1.90  | -1.68 |
| ONECUT2     | 9480   | NM_004452     | 14123 | -1.11 | -1.20 | -1.58 | 0.09  | -0.62 | -0.35 | -0.63 | -0.44 | -0.61 | -3.89 | -0.87 | -1.68 |
| DKFZP666144 | 25996  | NM_015523     | 14124 | -0.02 | -0.98 | -0.58 | 0.50  | 0.91  | 0.41  | -0.29 | -0.99 | -0.40 | -1.58 | 1.01  | -1.68 |
| MGAM5       | 5102   | NM_001069     | 14125 | -1.24 | -1.12 | -1.24 | -1.24 | -1.12 | -1.24 | -1.24 | -1.12 | -1.24 | -1.36 | 4.73  | -1.68 |
| MPH11       | 4629   | NM_002474     | 14126 | 0.42  | -0.46 | -0.88 | 0.92  | 0.94  | 0.77  | -0.25 | -0.56 | -0.87 | -0.92 | 2.63  | -1.68 |
| P2RY12      | 64805  | NM_176876     | 14127 | 0.33  | 0.46  | 0.13  | 0.90  | 1.02  | 1.41  | -0.68 | -0.48 | -0.52 | 0.93  | 3.33  | -1.68 |
| RF1         | 1869   | NM_001225     | 14128 | -0.30 | -0.47 | -0.36 | -0.18 | -0.02 | -0.36 | -0.52 | -0.62 | -0.88 | -0.88 | 1.09  | -1.68 |
| TP53NP2     | 58476  | NM_021202     | 14129 | 0.40  | -0.65 | -0.75 | -0.27 | 0.30  | -0.11 | -0.20 | -0.70 | -0.78 | -1.80 | -0.08 | -1.68 |
| SUC16A1     | 6566   | NM_003051     | 14130 | 1.48  | -0.51 | -0.59 | 0.65  | 2.75  | 2.86  | -0.16 | -0.94 | -0.58 | 0.38  | 6.27  | -1.68 |
| LOC409126   | 11487  | NM_080664     | 14131 | -0.88 | 0.43  | 0.38  | 0.97  | 1.63  | 2.68  | -0.50 | -0.49 | -0.68 | -1.19 | 5.29  | -1.68 |
| CG2         | 14433  | NM_031378     | 14132 | 0.44  | 0.41  | 0.41  | 0.41  | 0.41  | 0.41  | -0.40 | -0.41 | -0.41 | 0.24  | 1.54  | -1.68 |
| ARHGAP1     | 392    | NM_004308     | 14133 | -0.02 | 0.00  | -0.15 | 1.88  | 1.73  | 1.65  | -0.62 | -0.35 | -0.71 | -1.18 | 5.26  | -1.68 |
| NUP2        | 11097  | NM_007342     | 14134 | -0.40 | -0.18 | 0.78  | 1.94  | 1.35  | 1.27  | -0.74 | -0.79 | -0.16 | 0.63  | 4.56  | -1.68 |
| LOC41514    | 5486   | NM_00100886   | 14135 | -1.09 | -0.72 | -0.72 | -1.09 | -0.72 | -0.72 | -1.09 | -0.72 | -0.72 | -2.75 | 0.57  | -1.68 |
| KIA0555     | 9832   | NM_014790     | 14136 | 0.17  | -0.80 | 0.18  | 1.84  | 0.91  | 0.67  | -0.59 | -0.90 | -0.20 | -0.46 | 3.41  | -1.68 |
| ECE1        | 1889   | NM_001397     | 14137 | 0.73  | -0.46 | -0.53 | 0.28  | -0.02 | -0.52 | -0.76 | -0.53 | -0.39 | -1.72 | -0.26 | -1.68 |
| ANKK4       | 389    | NM_001303     | 14138 | 0.36  | -0.03 | 0.08  | 1.14  | 0.81  | 0.71  | -0.72 | -0.61 | -0.71 | -0.40 | 2.87  | -1.68 |
| TBM48       | 79997  | NM_024114     | 14139 | 1.34  | -1.16 | -1.42 | 1.14  | 2.38  | 2.25  | -0.18 | -0.82 | -0.68 | -1.24 | 3.77  | -1.68 |
| PCDH9       | 9752   | NM_031857     | 14140 | 0.18  | 0.06  | -0.55 | 1.00  | 2.04  | 1.72  | -0.40 | -0.62 | -0.67 | -0.32 | 4.76  | -1.68 |
| CEP         | 1071   | NM_000078     | 14141 | -0.81 | -0.03 | -0.24 | 1.62  | 1.27  | 1.52  | -0.91 | -0.01 | -0.76 | -1.08 | 4.42  | -1.68 |
| LOC408188   | 264239 | NM_157171     | 14142 | -0.08 | -0.53 | -0.95 | -0.13 | 0.24  | 1.08  | 0.66  | -0.13 | -0.24 | -1.46 | 1.87  | -1.68 |
| PFN2        | 5202   | NM_012394     | 14143 | -0.45 | -0.45 | -1.18 | -0.46 | 0.46  | 0.90  | -0.22 | -0.39 | -1.08 | -2.00 | -0.90 | -1.68 |
| GF1B        | 8329   | NM_004188     | 14144 | -0.52 | -0.63 | -0.46 | 1.27  | 1.38  | 0.80  | -0.68 | -0.56 | -0.45 | -1.62 | 3.46  | -1.68 |
| CMAB        | 2313   | NM_015266     | 14145 | -0.00 | -0.29 | -0.26 | 0.00  | -0.29 | -0.26 | -0.17 | -1.49 | -0.67 | 0.66  | 2.06  | -1.68 |
| OXAL1       | 5018   | NM_000515     | 14146 | -1.29 | -1.24 | -1.31 | -1.15 | -0.61 | -0.91 | -0.17 | -0.61 | -0.90 | -3.83 | 0.15  | -1.68 |
| RF1L        | 117584 | NM_01017368   | 14147 | -0.18 | -0.70 | 0.03  | 1.03  | 0.90  | 1.30  | -0.34 | -0.92 | -0.42 | -0.29 | 3.23  | -1.69 |
| RAF3        | 5105   | NM_010907     | 14148 | -0.89 | 0.91  | -0.33 | -0.43 | -0.30 | 0.91  | -0.61 | -0.62 | -0.62 | -0.61 | 4.31  | -1.69 |
| WBSK18      | 84277  | NM_032317     | 14149 | -0.41 | -1.22 | -1.34 | -0.79 | -0.02 | -0.29 | -0.15 | -0.94 | -0.59 | -2.87 | -1.10 | -1.69 |
| TCPO1       | 140290 | NM_144659     | 14150 | 0.30  | -0.71 | 0.28  | -0.09 | 0.37  | 1.20  | -0.50 | -0.81 | -0.38 | -0.13 | 1.48  | -1.69 |
| FLU1021     | 65117  | NM_020212     | 14151 | -0.41 | -0.43 | -0.57 | 0.58  | 0.24  | 0.76  | -0.28 | -0.61 | -0.79 | -0.68 | 1.58  | -1.69 |
| RAO         | 1145   | NM_000201     | 14152 | 0.04  | -0.12 | 0.01  | 0.05  | -0.42 | 0.57  | 0.09  | -0.09 | -0.08 | 0.88  | 0.39  | -1.69 |
| MAG         | 4099   | NM_002361     | 14153 | 0.27  | -0.51 | -1.08 | 0.91  | 0.33  | 0.38  | -0.41 | -0.28 | -0.99 | -1.33 | 0.87  | -1.69 |
| NPYA        | 4800   | NM_021705     | 14154 | 0.14  | 0.38  | -0.16 | 1.66  | 1.19  | 2.40  | -0.08 | -0.68 | -0.92 | 0.36  | 5.26  | -1.69 |
| LOC41421    | 1154   | NM_0010721    | 14155 | 0.19  | -0.17 | 0.68  | 0.88  | 0.89  | 0.66  | -0.28 | -0.19 | -0.68 | 0.44  | 1.17  | -1.69 |
| GRP153      | 387509 | NM_207370     | 14156 | -0.55 | -0.97 | -0.70 | 1.00  | 0.65  | 1.27  | -1.12 | -0.75 | -0.82 | -2.22 | 2.01  | -1.69 |
| KRDL3L3     | 115653 | NM_153443     | 14157 | -0.26 | -0.39 | 0.06  | 0.52  | 0.67  | 0.65  | -0.70 | -0.69 | -0.30 | -0.59 | 1.84  | -1.69 |
| KIA04895    | 7995   | NM_0010805    | 14158 | 0.05  | -0.58 | -0.85 | -0.27 | 0.23  | 0.85  | -0.27 | -0.23 | -0.88 | -1.37 | 1.37  | -1.69 |
| FLU3730     | 124602 | NM_151209     | 14159 | 1.16  | 0.48  | 0.55  | 1.77  | 1.40  | 2.82  | -0.31 | -0.57 | -0.81 | -2.18 | 5.99  | -1.69 |
| CDY         | 208611 | NM_001001722  | 14160 | -0.01 | -0.81 | -0.07 | 0.92  | 1.56  | 0.48  | -0.22 | -1.09 | -0.38 | -0.89 | 2.97  | -1.69 |
| PARGG1A     | 10891  | NM_013261     | 14161 | -1.23 | -0.65 | -1.06 | 0.22  | -0.67 | 0.25  | -0.84 | -0.05 | -0.79 | -2.94 | -0.20 | -1.69 |
| LOC41136    | 55146  | NM_018393     | 14162 | 0.75  | 0.55  | -0.55 | 0.33  | 1.06  | 0.33  | -0.44 | -0.90 | -0.14 | -1.63 | 1.20  | -1.69 |
| PANK2       | 56666  | NM_052839     | 14163 | -0.59 | -0.65 | -0.34 | -0.84 | 0.80  | 0.48  | -0.67 | -0.77 | -0.25 | -1.18 | 2.12  | -1.69 |
| ORH2        | 7932   | NM_007160     | 14164 | -0.27 | -0.30 | -0.06 | 0.02  | 1.10  | 0.97  | -0.41 | -0.79 | -0.50 | -0.63 | 2.05  | -1.69 |
| IT20035     | 5560   | NM_016521     | 14165 | 0.05  | 0.01  | 0.01  | 0.05  | 0.01  | 0.01  | -0.61 | -0.47 | -0.16 | 0.24  | 1.56  | -1.69 |
| SET         | 6418   | NM_003011     | 14166 | 0.45  | -0.24 | -0.44 | 1.38  | 1.86  | 0.63  | -0.41 | -0.70 |       |       |       |       |



|             |        |              |       |       |       |       |       |       |       |       |       |       |       |       |       |
|-------------|--------|--------------|-------|-------|-------|-------|-------|-------|-------|-------|-------|-------|-------|-------|-------|
| NCSH        | 11388  | NM_007184    | 14249 | -0.75 | -0.95 | -0.41 | -0.80 | 0.08  | -0.14 | -0.31 | -0.78 | -0.63 | -2.11 | -0.86 | -1.72 |
| GA43        | 2780   | NM_012654    | 14250 | -0.35 | -0.29 | -0.74 | -0.67 | -0.80 | -0.74 | -0.65 | -0.80 | -0.75 | -1.60 | -0.07 | -1.72 |
| ACADVL      | 37     | NM_00103859  | 14251 | -0.67 | 0.15  | -0.24 | 2.17  | 3.36  | 2.81  | 0.46  | -0.46 | -0.80 | 0.70  | 8.34  | 1.72  |
| CNTNAP5     | 129684 | NM_130773    | 14252 | -0.83 | -0.46 | 0.57  | 0.62  | 0.39  | 0.88  | -0.91 | -0.72 | -0.09 | -0.73 | 1.89  | -1.72 |
| TRAPP4      | 51399  | NM_016146    | 14253 | -0.10 | -0.30 | 0.61  | 1.74  | 0.40  | 1.20  | -0.67 | -0.71 | -0.34 | 0.20  | 3.34  | -1.72 |
| HMCAC10     | 8382   | NM_017054    | 14254 | -0.31 | 0.28  | -0.11 | 0.19  | 0.67  | 0.19  | -0.50 | -0.52 | -0.67 | 0.70  | 1.51  | -1.72 |
| DNTT        | 1791   | NM_00107520  | 14255 | -0.68 | -0.86 | -0.33 | 0.71  | 0.84  | 0.21  | -0.83 | -0.95 | 0.07  | -1.87 | 1.75  | -1.72 |
| PH16        | 9767   | NM_014735    | 14256 | -0.55 | -0.85 | -0.42 | 0.33  | 0.23  | 0.08  | -0.63 | -0.69 | -0.40 | -1.81 | 0.62  | -1.72 |
| DM17        | 2628   | NM_012571    | 14257 | -0.51 | 0.63  | -0.11 | 0.11  | 0.12  | 0.27  | -0.52 | -0.43 | -0.61 | -1.47 | 0.98  | -1.72 |
| KCNQ1       | 3784   | NM_181797    | 14258 | -0.30 | -0.19 | -0.14 | 1.83  | 1.46  | 1.15  | -0.52 | -0.62 | -0.57 | -0.03 | 4.44  | -1.72 |
| PC17B       | 9468   | NM_004485    | 14259 | -0.64 | -0.37 | -0.60 | 1.40  | 0.87  | 0.64  | -0.96 | 0.02  | -0.77 | -1.62 | 2.93  | -1.72 |
| PH12        | 979    | NM_002603    | 14260 | -0.36 | 0.08  | -0.42 | -0.10 | 0.12  | 0.12  | -1.12 | -0.73 | -0.80 | -1.44 | 1.88  | -1.72 |
| FABP5       | 2171   | NM_010444    | 14261 | -0.49 | -0.27 | -0.41 | -0.35 | -0.26 | 0.07  | -0.31 | -0.88 | -0.53 | -2.16 | 0.06  | -1.72 |
| GRP133      | 283183 | NM_198827    | 14262 | -0.47 | 0.38  | 1.02  | 2.13  | 2.06  | 1.22  | -0.78 | -0.76 | -0.18 | 1.86  | 5.41  | -1.72 |
| MS12        | 7903   | NM_024039    | 14263 | -0.03 | -0.86 | -0.10 | 1.04  | 1.23  | 0.58  | -0.44 | -0.99 | -0.29 | -1.00 | 2.84  | -1.72 |
| DCM4        | 2626   | NM_017004    | 14264 | -0.23 | 0.42  | -0.86 | 1.15  | 0.23  | 1.55  | -0.65 | 0.04  | -1.11 | 0.79  | 2.93  | -1.72 |
| FL30469     | 284348 | NM_182573    | 14265 | -0.12 | -0.64 | -0.02 | 0.74  | 0.89  | 0.62  | -0.52 | -0.83 | -0.38 | -0.54 | 2.24  | -1.72 |
| FLU2314     | 60994  | NM_021827    | 14266 | -0.57 | -0.15 | -0.50 | -0.71 | -0.42 | -0.42 | -0.33 | -0.98 | -0.41 | -2.12 | -1.55 | -1.72 |
| DIKZP44C06C | 144203 | NM_240933    | 14267 | 0.17  | -0.12 | 0.08  | 2.00  | 0.99  | 2.77  | -0.55 | -0.38 | -0.79 | 0.12  | 6.76  | -1.72 |
| FHL3        | 2275   | NM_004468    | 14268 | -0.30 | -0.44 | -0.45 | 0.53  | -0.13 | 1.10  | -0.87 | -0.52 | -0.34 | -1.19 | 0.50  | -1.72 |
| THP01       | 7064   | NM_003249    | 14269 | -0.35 | -0.72 | -0.39 | 2.39  | 2.01  | 1.08  | -0.25 | -0.84 | -0.63 | -1.45 | 5.46  | -1.72 |
| SEMAC       | 54910  | NM_017789    | 14270 | -0.47 | -0.78 | -0.50 | 0.38  | 0.83  | -0.08 | -0.32 | -0.92 | -0.49 | -1.75 | 1.13  | -1.72 |
| SOCCAG10    | 10283  | NM_005869    | 14271 | -0.72 | -0.35 | -0.68 | -0.20 | 0.14  | 0.95  | -0.71 | -0.32 | -0.70 | 0.89  | 1.72  | -1.72 |
| GP01        | 2819   | NM_005276    | 14272 | 0.06  | -0.58 | -0.97 | -0.02 | 0.04  | -0.12 | -0.27 | -0.46 | -1.00 | -1.49 | -0.11 | -1.72 |
| THM2        | 23670  | NM_00113820  | 14273 | -0.14 | -0.03 | -0.07 | 1.58  | 1.96  | 2.20  | -0.52 | -0.57 | -0.63 | 0.05  | 5.73  | -1.72 |
| AKC41       | 21     | NM_002089    | 14274 | -0.88 | -0.83 | -0.54 | 0.70  | -0.52 | -0.21 | 1.01  | -0.20 | -0.51 | -2.25 | -0.09 | -1.72 |
| PME-1       | 51400  | NM_016147    | 14275 | 0.13  | 0.04  | -0.18 | 0.41  | 0.43  | 0.65  | -0.46 | -0.46 | -0.81 | -0.02 | 1.49  | -1.72 |
| NRF         | 55922  | NM_017544    | 14276 | -0.01 | -0.53 | -0.57 | 0.64  | 0.43  | 0.31  | -0.33 | -0.69 | -0.70 | -1.11 | 1.38  | -1.72 |
| MS18        | 10538  | NM_005099    | 14277 | -0.15 | 0.94  | -0.88 | -0.59 | -0.62 | -0.82 | -0.62 | -0.82 | -0.69 | -2.88 | 2.09  | -1.72 |
| ABC810      | 234656 | NM_012089    | 14278 | -0.30 | 0.06  | -0.19 | 1.85  | 1.92  | 1.21  | -0.74 | -0.66 | -0.32 | -0.43 | 4.97  | -1.72 |
| SHLECS      | 8779   | NM_003830    | 14279 | -0.87 | -1.27 | -1.30 | -1.12 | -1.11 | -0.72 | -0.25 | -0.82 | -0.66 | -3.44 | -2.95 | -1.72 |
| SH1M1       | 3857   | NM_012818    | 14280 | -0.69 | -0.42 | -0.83 | -1.21 | -0.62 | -0.33 | -0.61 | -0.33 | -0.71 | -1.85 | 1.80  | -1.72 |
| NDUFAB5     | 4698   | NM_005000    | 14281 | -0.11 | 0.02  | -0.58 | 2.34  | 1.52  | 3.10  | -0.46 | -0.36 | -0.91 | -0.67 | 6.87  | -1.72 |
| CC11        | 6356   | NM_002886    | 14282 | -0.49 | -0.34 | -0.41 | 1.40  | 0.77  | 0.76  | -0.71 | -0.53 | -0.49 | -1.24 | 2.94  | -1.72 |
| ANCS        | 6598   | NM_023928    | 14283 | -0.95 | -0.32 | -0.96 | 0.50  | 0.11  | -0.44 | -0.82 | -0.28 | -0.63 | -2.22 | 1.07  | -1.72 |
| CC111       | 637    | NM_002409    | 14284 | -0.09 | 0.15  | -0.01 | 0.11  | 0.21  | 0.11  | -0.46 | -0.77 | -0.56 | -0.12 | 0.44  | -1.72 |
| ADCY1       | 107    | NM_021116    | 14285 | -0.70 | -0.30 | -0.85 | -0.27 | -0.21 | -0.12 | -0.58 | -0.32 | -0.84 | -1.85 | -0.60 | -1.72 |
| SCN3B       | 55800  | NM_018400    | 14286 | -0.13 | -0.40 | -0.25 | 1.12  | 0.73  | 0.57  | -0.54 | -0.60 | -0.58 | -0.53 | 2.42  | -1.72 |
| Y22557      | 7918   | NM_021713    | 14287 | -0.10 | 0.72  | -0.86 | -0.79 | 1.76  | 1.47  | -0.16 | -0.86 | -0.77 | -1.48 | 2.81  | -1.72 |
| ADBR42      | 157    | NM_005160    | 14288 | -1.03 | -0.20 | -0.22 | 0.86  | 1.05  | 1.23  | -0.86 | -0.56 | -0.31 | -1.45 | 3.13  | -1.72 |
| PHK13       | 5289   | NM_002647    | 14289 | -0.14 | -0.37 | -0.50 | 0.09  | 0.49  | 0.12  | -0.45 | -0.66 | -0.62 | -1.01 | 0.70  | -1.72 |
| FLA23       | 1121   | NM_0013707   | 14290 | -0.89 | -0.05 | -0.07 | -0.05 | -0.16 | 0.05  | -0.60 | -0.77 | -0.51 | -1.55 | 1.19  | -1.72 |
| TRP3        | 9326   | NM_00103577  | 14291 | -1.06 | -1.16 | -1.33 | 1.10  | -0.56 | -0.20 | -0.70 | -0.30 | -0.74 | -0.67 | 1.78  | -1.72 |
| LOC20347    | 20347  | NM_01017980  | 14292 | -0.72 | -0.33 | -1.13 | -0.53 | -0.37 | -0.36 | -0.67 | -0.13 | -0.93 | -2.17 | -1.26 | -1.72 |
| EBF         | 1879   | NM_024027    | 14293 | -0.63 | -0.96 | -0.55 | -0.08 | 0.39  | -0.09 | -0.64 | -0.73 | -0.36 | -0.73 | 0.22  | -1.72 |
| LOC41518    | 441518 | NM_0078173   | 14294 | -0.53 | 0.12  | -0.70 | 0.62  | 0.58  | 0.40  | -0.52 | -0.45 | -0.32 | -1.34 | 1.15  | -1.72 |
| SH3RF2      | 153769 | NM_152550    | 14295 | -0.70 | -0.91 | 0.87  | 0.20  | 0.15  | 1.90  | -0.64 | -0.55 | -0.55 | -0.73 | 2.25  | -1.72 |
| CK11        | 2919   | NM_001511    | 14296 | -0.06 | -0.26 | -0.52 | 0.55  | 0.05  | 0.37  | -0.45 | -0.58 | -0.70 | -0.84 | 0.98  | -1.72 |
| AT2N2       | 2245   | NM_001888    | 14297 | -0.07 | 0.57  | -0.65 | 0.64  | 0.67  | 0.69  | -0.67 | -0.69 | -0.69 | -1.29 | 0.51  | -1.72 |
| COX15       | 1355   | NM_004376    | 14298 | -0.91 | -0.95 | -1.35 | 1.23  | 0.13  | 0.25  | -0.52 | -0.54 | -0.67 | -3.21 | 1.10  | -1.72 |
| MGC3647     | 146433 | NM_152456    | 14299 | -0.52 | 0.56  | -1.20 | 0.19  | 1.43  | 0.20  | -0.67 | -0.22 | -0.84 | -1.16 | 1.82  | -1.72 |
| GRP10449    | 2739   | NM_016489    | 14300 | -0.59 | 0.58  | -0.24 | -0.76 | 1.16  | 0.80  | -0.76 | -1.16 | -0.80 | -0.25 | 3.08  | -1.72 |
| IMP0H1      | 3654   | NM_183243    | 14301 | -0.16 | -1.00 | -0.64 | 0.23  | 0.60  | 0.23  | -0.28 | -0.82 | -0.63 | -1.80 | 0.60  | -1.72 |
| CKN3        | 23604  | NM_014326    | 14302 | -0.71 | -0.38 | -0.09 | 0.02  | 0.52  | 0.68  | -0.62 | -0.65 | -0.46 | -1.19 | 1.22  | -1.72 |
| KCNG3       | 17050  | NM_172444    | 14303 | -0.09 | -0.09 | -0.52 | 0.25  | 1.60  | 0.35  | -0.33 | -0.59 | -0.81 | -0.52 | 2.20  | -1.72 |
| RP13-36C9.3 | 441519 | NM_00017435  | 14304 | -0.40 | -1.08 | -0.88 | -0.21 | -0.88 | -0.21 | -0.09 | -0.82 | -0.68 | -2.37 | 0.29  | -1.72 |
| MMJ2D       | 56009  | NM_018039    | 14305 | -1.13 | -0.86 | -0.00 | -0.36 | -0.56 | -0.64 | -0.88 | -0.54 | -0.32 | -2.88 | -1.56 | -1.72 |
| KIF18       | 23905  | NM_183416    | 14306 | -0.33 | -0.88 | -0.32 | 0.71  | 1.14  | 0.04  | -0.69 | -0.68 | -0.34 | -0.55 | 1.91  | -1.72 |
| CR30D1      | 16408  | NM_01155152  | 14307 | -0.80 | -0.45 | -0.66 | -0.02 | -0.05 | -0.02 | -0.45 | -0.62 | -0.67 | -1.18 | 0.21  | -1.72 |
| STAR10      | 10809  | NM_006645    | 14308 | -1.00 | -0.46 | -1.19 | -0.62 | -0.32 | -0.81 | -0.61 | -0.39 | -0.74 | -2.75 | -1.12 | -1.72 |
| PCN1        | 11138  | NM_00110426  | 14309 | -1.43 | -0.49 | -0.50 | 0.37  | 0.35  | 0.31  | -0.73 | -0.54 | -0.47 | -1.41 | 0.21  | -1.72 |
| PCN2        | 12745  | NM_012038    | 14310 | -0.80 | -0.30 | -0.25 | 1.04  | 0.99  | 0.49  | -0.79 | -0.42 | -0.53 | -1.43 | 2.51  | -1.72 |
| ASMTL       | 8623   | NM_004192    | 14311 | -0.38 | -0.62 | -0.40 | -0.16 | 0.80  | 0.24  | -0.48 | -0.73 | -0.53 | -1.43 | 0.88  | -1.72 |
| SMTG2       | 54221  | NM_018968    | 14312 | -0.49 | -0.01 | -0.36 | 0.93  | 0.18  | 1.60  | -0.81 | -0.17 | -0.76 | -0.86 | 2.71  | -1.72 |
| SFA1        | 6494   | NM_006747    | 14313 | -0.63 | -0.75 | -0.34 | 0.27  | 0.60  | 0.89  | -0.57 | -0.88 | -0.29 | -1.03 | 1.76  | -1.72 |
| PSM1/CCP11  | 2195   | NM_013696    | 14314 | -0.27 | 0.63  | -0.48 | -0.49 | 0.91  | 0.84  | -0.77 | -0.77 | -0.48 | -1.41 | 2.44  | -1.72 |
| GEORF198    | 167838 | NM_153235    | 14315 | -0.70 | -0.19 | -0.98 | -0.21 | 0.88  | -0.71 | -0.55 | -0.48 | -1.47 | 1.34  | -1.72 |       |
| MPLR139     | 54148  | NM_017446    | 14316 | -0.06 | -0.39 | -0.80 | 0.16  | 0.52  | 1.27  | -0.27 | -0.64 | -0.83 | -1.13 | 1.95  | -1.72 |
| FLU2322     | 8024   | NM_001102071 | 14317 | -0.88 | -0.88 | -0.60 | 0.13  | 0.65  | 1.07  | -0.30 | -0.77 | -0.63 | -0.03 | 3.65  | -1.72 |
| OCA2        | 4948   | NM_000275    | 14318 | 0.76  | 0.18  | 0.79  | 1.45  | 2.09  | 1.12  | -0.39 | -0.83 | -0.51 | -0.74 | 4.66  | -1.72 |
| GRP142      | 350383 | NM_181790    | 14319 | -0.50 | -1.01 | -0.55 | 0.18  | -0.45 | -0.73 | -0.70 | -0.80 | -0.23 | -2.06 | -1.00 | -1.72 |
| GRP105      | 8380   | NM_002566    | 14320 | -0.90 | -0.50 | -0.50 | -0.40 | -0.76 | -0.40 | -0.76 | -0.40 | -0.76 | -1.94 | 0.20  | -1.72 |
| UNC608      | 374899 | NM_198538    | 14321 | -0.59 | -0.76 | -0.41 | -0.12 | -0.79 | 0.47  | -0.53 | -0.53 | -0.69 | -1.74 | 0.44  | -1.72 |
| LOC653659   | 63659  | NM_01079809  | 14322 | -0.77 | -0.69 | -0.67 | 0.57  | -0.04 | 0.12  | -0.80 | -0.56 | -0.39 | -2.12 | 0.65  | -1.72 |
| LAR         | 80216  | NM_025144    | 14323 | -0.29 | -0.22 | -0.55 | 1.19  | 0.67  | 0.76  | -0.37 | -0.65 | -0.73 | -0.48 | 2.62  | -1.72 |
| AS1         | 292    | NM_002092    | 14324 | -0.35 | -0.19 | -0.19 | 0.12  | 0.12  | 0.12  | -0.55 | -0.68 | -0.74 | -0.61 | 0.96  | -1.72 |
| ASNA1       | 439    | NM_004317    | 14325 | -0.45 | -0.07 | -0.55 | -0.39 | 0.44  | 0.05  | -0.77 | -0.34 | -0.64 | -0.92 | 0.87  | -1.72 |
| RPJSD2      | 27079  | NM_152260    | 14326 | -1.37 | -1.49 | -1.22 | -0.61 | -0.54 | -0.67 | -0.50 | -0.93 | -0.32 | -4.09 | -1.82 | -1.72 |
| RPJSD3      | 23424  | NM_012119    | 14327 | -1.62 | -1.62 | -1.62 | -1.62 | -1.62 | -1.62 | -1.62 | -1.62 | -1.62 | -1.62 | -1.62 | -1.72 |
| LAMP1       | 3916   | NM_005561    | 14328 | -0.92 | -0.80 | -1.12 | -0.55 | -0.69 | -0.59 | -0.46 | -0.51 | -0.77 | -2.04 | -1.8  |       |

|             |        |              |       |       |       |       |       |       |       |       |       |       |       |       |       |       |
|-------------|--------|--------------|-------|-------|-------|-------|-------|-------|-------|-------|-------|-------|-------|-------|-------|-------|
| DCP2        | 4957   | NM_153437    | 14411 | 0.50  | -0.56 | 0.35  | 0.73  | 1.49  | 1.21  | -0.31 | -0.40 | 0.56  | 0.29  | 3.43  | -1.77 |       |
| ATP1A3      | 2178   | NM_015226    | 14412 | -0.51 | -0.10 | -0.14 | 2.10  | 1.64  | 2.93  | -0.80 | -2.43 | -0.90 | -0.78 | 6.44  | -1.77 |       |
| DNAIC10     | 54431  | NM_018981    | 14413 | -0.40 | 0.70  | -0.06 | 0.16  | 1.91  | 1.23  | 0.52  | -0.45 | -0.80 | 0.24  | 3.30  | -1.77 |       |
| ABC87       | 22     | NM_004299    | 14414 | -0.38 | -0.58 | 0.91  | 1.32  | 1.16  | 0.50  | -0.96 | -0.73 | -0.08 | -0.05 | 2.98  | -1.77 |       |
| FFH11       | 24344  | NM_012143    | 14415 | -1.14 | -0.44 | -1.08 | -0.19 | 0.85  | -0.25 | -0.89 | -0.52 | -0.36 | -2.67 | 0.41  | -1.77 |       |
| ECCE217     | 9076   | NM_012917    | 14416 | -0.16 | 0.39  | 0.00  | 0.76  | 1.04  | 1.04  | -0.22 | -0.26 | 0.00  | 0.72  | 4.10  | -1.77 |       |
| SPN13       | 10816  | NM_006652    | 14417 | -0.56 | 0.10  | -0.13 | 0.26  | 0.59  | 0.58  | -0.89 | -0.42 | -0.46 | -0.59 | 1.43  | -1.77 |       |
| PRFR3       | 5209   | NM_004566    | 14418 | -0.58 | -0.92 | -0.44 | -0.14 | 0.15  | 0.18  | -0.52 | -0.79 | -0.46 | -1.94 | 0.19  | -1.77 |       |
| SHR2        | 681    | NM_041503    | 14419 | -0.63 | -0.09 | 0.22  | 0.71  | 1.12  | 1.04  | -0.27 | -0.62 | -0.22 | -0.10 | 1.25  | -1.77 |       |
| LUCTA       | 51747  | NM_006107    | 14420 | -0.65 | -0.97 | -0.16 | -0.16 | 0.79  | 0.81  | -0.33 | -0.93 | -0.50 | -1.77 | 1.43  | -1.77 |       |
| ERF         | 2077   | NM_006494    | 14421 | -0.90 | -0.85 | -0.58 | -0.41 | -0.23 | -0.87 | -0.71 | -0.78 | -0.28 | -2.83 | -0.69 | -1.77 |       |
| ORO         | 8127   | NM_004792    | 14422 | -0.42 | -0.62 | -0.24 | -0.12 | 0.45  | -0.22 | -0.78 | -0.34 | -0.72 | -1.84 | 1.84  | -1.77 |       |
| CELSR1      | 9620   | NM_014246    | 14423 | 0.81  | -0.22 | -0.62 | -0.26 | 0.13  | 0.18  | 0.76  | -0.44 | -0.57 | 1.65  | 0.05  | -1.77 |       |
| C3ORF1      | 51300  | NM_016589    | 14424 | 0.58  | -0.37 | 0.36  | 1.77  | 0.79  | 0.87  | -0.56 | -0.80 | -0.41 | 0.57  | 3.43  | -1.77 |       |
| APFC1A      | 10552  | NM_006409    | 14425 | -1.18 | -1.41 | -1.55 | -0.99 | -1.18 | -0.47 | -0.78 | -0.64 | -0.35 | -4.15 | -2.63 | -1.77 |       |
| IGF4        | 44482  | NM_001002023 | 14426 | 3.57  | 1.59  | 4.33  | 5.28  | 4.59  | 7.57  | 0.45  | 0.20  | 0.61  | 9.79  | 17.43 | -1.77 |       |
| LOC161247   | 161247 | NM_203402    | 14427 | -0.49 | -0.30 | -0.07 | -0.10 | 2.33  | 1.34  | -0.49 | -0.77 | -0.51 | -0.67 | 3.57  | -1.77 |       |
| MC139780    | 199857 | NM_144988    | 14428 | 0.30  | -0.28 | -0.71 | 0.49  | 0.64  | 1.50  | -0.38 | -0.59 | -0.81 | -0.69 | 2.63  | -1.77 |       |
| FHM92       | 143162 | NM_001017929 | 14429 | -0.69 | -0.61 | -0.34 | 0.63  | 0.68  | 0.92  | -0.77 | -0.49 | -0.51 | -1.63 | 2.23  | -1.77 |       |
| KIF14       | 9828   | NM_014875    | 14430 | -0.08 | -0.82 | -0.89 | 0.85  | 0.19  | 0.25  | -0.27 | -0.81 | -0.69 | -1.80 | 1.29  | -1.77 |       |
| SV2B        | 9899   | NM_014848    | 14431 | -0.61 | -0.25 | -0.74 | -0.15 | 0.18  | 0.10  | -0.51 | -0.50 | -0.75 | -1.60 | 0.12  | -1.77 |       |
| NG2L1       | 81555  | NM_030808    | 14432 | 0.07  | -0.46 | 0.36  | 0.92  | 1.20  | 1.56  | -0.45 | -0.68 | -0.65 | -0.03 | 3.67  | -1.77 |       |
| IGF4        | 1954   | NM_001410    | 14433 | -0.67 | 0.62  | -0.78 | 0.02  | 0.15  | 1.26  | -0.21 | -0.61 | -0.95 | 2.08  | 1.42  | -1.77 |       |
| IL6R        | 3570   | NM_181359    | 14434 | -0.89 | -0.17 | -0.48 | 1.23  | 1.50  | 0.71  | -0.99 | -0.09 | -0.69 | -1.55 | 3.45  | -1.77 |       |
| P2RX2       | 22953  | NM_174872    | 14435 | -1.17 | -1.18 | -1.32 | -1.48 | 0.23  | -0.10 | 0.16  | -0.80 | -1.14 | -1.67 | -1.85 | -1.77 |       |
| SLC3A2      | 10568  | NM_006424    | 14436 | -0.47 | -0.21 | -0.36 | 1.49  | 1.67  | 0.79  | 0.80  | -0.46 | -0.52 | -1.04 | 3.94  | -1.77 |       |
| TLL1        | 7092   | NM_012464    | 14437 | -0.92 | -0.21 | -0.36 | 0.30  | 0.67  | -0.06 | -0.90 | -0.48 | -0.39 | -1.48 | 0.92  | -1.77 |       |
| PHO1L1      | 93035  | NM_177331    | 14438 | -1.18 | -1.13 | -1.27 | -0.64 | -0.55 | -0.74 | -0.53 | -0.61 | -0.63 | -3.58 | -2.14 | -1.77 |       |
| NRNG5       | 7942   | NM_024075    | 14439 | 0.95  | -1.03 | -0.74 | 0.13  | 0.34  | 0.19  | -0.34 | -0.19 | -0.64 | -2.72 | 0.64  | -1.77 |       |
| DCUN1D2     | 55208  | NM_001014283 | 14440 | -0.10 | -0.11 | 0.06  | 0.62  | 0.38  | 1.25  | -0.55 | -0.56 | -0.67 | -0.15 | 2.25  | -1.77 |       |
| LOC28423    | 28423  | NM_001010880 | 14441 | -0.22 | 0.23  | -0.19 | 0.73  | 1.23  | 0.39  | -0.41 | -0.47 | -0.50 | -1.18 | 2.36  | -1.77 |       |
| SH3BP4      | 5319   | NM_012100    | 14442 | -1.40 | -1.26 | -1.42 | -1.40 | -1.26 | -1.42 | -1.40 | -1.26 | -1.42 | -2.24 | -4.27 | -1.77 |       |
| DFP3        | 64180  | NM_022357    | 14443 | 0.56  | -0.49 | -0.47 | 0.39  | 0.53  | 0.87  | -0.67 | -0.42 | -0.60 | 1.19  | 1.79  | -1.77 |       |
| C14ORF32    | 93487  | NM_144578    | 14444 | 0.31  | -0.01 | 0.54  | 2.07  | 1.66  | 1.91  | -0.65 | -0.71 | -0.42 | 0.84  | 5.64  | -1.77 |       |
| ARL1        | 115761 | NM_138450    | 14445 | 0.33  | -0.11 | 0.37  | 1.12  | 0.72  | 2.03  | -0.41 | -0.64 | -0.73 | 0.58  | 3.87  | -1.77 |       |
| MMP         | 415    | NM_001025992 | 14446 | -0.39 | -0.39 | 0.66  | 0.95  | 1.52  | 0.72  | 1.02  | -0.75 | -0.52 | -0.20 | 5.88  | -1.77 |       |
| TNMF54      | 9777   | NM_014742    | 14447 | -0.86 | -0.52 | -0.70 | -0.08 | 0.18  | 0.00  | -0.83 | -0.59 | -0.35 | -2.07 | 0.10  | -1.77 |       |
| LOC64246    | 64246  | NM_101732877 | 14448 | -0.31 | -0.43 | -0.30 | 3.45  | 2.19  | 2.49  | -0.80 | -0.30 | -0.68 | -1.05 | 8.14  | -1.77 |       |
| FLJ20265    | 5487   | NM_0107373   | 14449 | 1.12  | 0.04  | 1.54  | 1.12  | 0.54  | 1.12  | 0.54  | 1.12  | 0.54  | -1.12 | 2.18  | -1.77 |       |
| SNP         | 80725  | NM_025248    | 14450 | -0.23 | -0.76 | 0.04  | 0.99  | 1.06  | 0.45  | -0.88 | -0.93 | 0.03  | -0.75 | 2.50  | -1.78 |       |
| OR5B17      | 21965  | NM_001005489 | 14451 | -0.37 | -0.95 | -0.08 | 0.17  | 0.35  | 0.07  | -0.52 | -0.96 | -0.29 | -1.40 | 0.59  | -1.78 |       |
| IL13        | 1201   | NM_012156    | 14452 | -1.76 | 0.12  | -0.70 | -1.82 | 0.88  | -0.52 | -0.88 | -0.52 | -1.38 | -1.67 | -1.78 | -1.78 |       |
| MC2749      | 79036  | NM_024069    | 14453 | -0.76 | 1.09  | -1.09 | 0.33  | -1.39 | 0.04  | 0.51  | -0.42 | -0.84 | -1.01 | -1.78 | -1.78 |       |
| PRGF2       | 10594  | NM_006445    | 14454 | -1.52 | -1.87 | -1.78 | -2.21 | -2.67 | -2.74 | -0.33 | -0.89 | -0.55 | -5.17 | -7.62 | -1.78 |       |
| LOC390667   | 90667  | NM_001013058 | 14455 | 1.38  | 1.24  | 0.39  | 1.52  | 1.55  | 2.41  | -0.48 | -0.43 | -0.87 | 2.81  | 5.48  | -1.78 |       |
| LOC10149    | 5470   | NM_018066    | 14456 | -0.24 | -0.37 | -0.90 | 0.21  | 0.97  | 0.80  | -0.28 | -0.31 | -0.68 | -0.20 | 0.15  | -1.78 |       |
| VX          | 26009  | NM_013452    | 14457 | -1.44 | -0.93 | -1.06 | -0.92 | -1.38 | -1.14 | -1.13 | -0.40 | -0.85 | -2.44 | -3.45 | -1.78 |       |
| FLJ38482    | 201931 | NM_001100389 | 14458 | -0.40 | -0.57 | 0.07  | 0.34  | 0.40  | 0.91  | -0.52 | -0.74 | -0.52 | -0.91 | 1.65  | -1.78 |       |
| ZNF919      | 2599   | NM_012144    | 14459 | 0.28  | -0.21 | 0.44  | 0.28  | -0.21 | 0.44  | 0.28  | -0.21 | 0.44  | 0.28  | -0.21 | 0.44  | -1.78 |
| CHST10      | 9486   | NM_004854    | 14460 | -0.84 | 0.12  | -0.13 | 0.37  | 0.38  | 0.37  | -0.88 | -0.26 | -0.54 | -0.85 | 1.13  | -1.78 |       |
| SPATC1      | 37586  | NM_001134374 | 14461 | -1.24 | -0.65 | -0.15 | -1.72 | -0.54 | -0.28 | -0.88 | -0.52 | -0.38 | -2.24 | -2.55 | -1.78 |       |
| FNMT        | 8386   | NM_0121325   | 14462 | -0.97 | -0.75 | -0.74 | -0.62 | -0.75 | -0.74 | -0.62 | -0.75 | -0.74 | -2.24 | -4.72 | -1.78 |       |
| LY24        | 133375 | NM_144634    | 14463 | 0.54  | -0.24 | -0.62 | 0.68  | 0.87  | 0.66  | 0.62  | -0.57 | -0.50 | 1.40  | 2.21  | -1.78 |       |
| DFZP5641086 | 25923  | NM_015459    | 14464 | -0.42 | -0.60 | -0.02 | -0.44 | 0.35  | 0.60  | -0.37 | -0.70 | -0.71 | -1.04 | -0.51 | -1.78 |       |
| SLC114      | 6897   | NM_030303    | 14465 | -0.13 | -0.77 | -0.97 | -0.35 | -0.40 | -0.85 | -0.22 | -0.77 | -0.80 | -1.87 | -1.60 | -1.78 |       |
| LOC14075    | 7954   | NM_024894    | 14466 | 0.97  | 0.09  | 0.55  | 0.97  | 2.00  | 1.97  | 0.58  | -0.44 | -0.74 | 1.43  | 4.48  | -1.78 |       |
| PMM1        | 26468  | NM_199160    | 14467 | 0.17  | -0.17 | 0.12  | 1.42  | 1.24  | 1.16  | -0.67 | -0.58 | -0.54 | 0.46  | 3.82  | -1.78 |       |
| PNM5        | 5372   | NM_002676    | 14468 | -0.36 | -0.42 | -0.41 | -1.00 | -0.20 | 0.56  | -0.59 | -0.42 | -0.78 | -1.79 | -0.65 | -1.78 |       |
| ZNF308      | 24591  | NM_001002035 | 14469 | 0.02  | -1.13 | -0.27 | 0.02  | 1.13  | -0.27 | 2.41  | -0.83 | -0.82 | 1.83  | 10.01 | -1.78 |       |
| TSP12       | 29122  | NM_013270    | 14470 | -0.53 | -0.30 | -1.02 | 0.47  | 0.05  | -0.09 | -0.81 | -1.18 | -0.80 | -1.85 | 0.43  | -1.78 |       |
| UCP2        | 7351   | NM_003355    | 14471 | -0.60 | 0.11  | -0.31 | 0.34  | 0.43  | 0.49  | -0.81 | -0.30 | -0.67 | -0.80 | 1.26  | -1.78 |       |
| YOD1        | 55432  | NM_0121566   | 14472 | -0.06 | -0.17 | -0.56 | 0.47  | 0.80  | 1.04  | -0.75 | -0.61 | -0.56 | -0.36 | 2.27  | -1.78 |       |
| RP11-396G18 | 440889 | NM_001024599 | 14473 | -0.47 | 0.51  | -0.72 | 0.86  | -0.26 | -0.08 | 0.73  | -0.54 | -0.52 | 1.70  | 0.52  | -1.79 |       |
| CGI-14      | 51005  | NM_015944    | 14474 | -0.83 | -0.40 | 0.09  | -0.16 | 0.48  | 0.77  | -0.78 | -0.72 | -0.29 | -1.13 | 1.09  | -1.79 |       |
| FLJ39378    | 35316  | NM_178154    | 14475 | -0.07 | -0.40 | -0.61 | 0.36  | 1.39  | 0.87  | -0.30 | -0.72 | -0.77 | -1.08 | 2.62  | -1.79 |       |
| TGF1        | 697    | NM_004845    | 14476 | 0.09  | -0.43 | -0.20 | 0.87  | 0.67  | 0.87  | -0.67 | -0.69 | -0.82 | -1.22 | 3.00  | -1.79 |       |
| CFP1A       | 1374   | NM_001018147 | 14477 | 0.03  | -0.64 | -0.14 | 1.40  | 0.66  | 0.65  | -0.67 | -0.79 | -0.33 | -0.75 | 2.71  | -1.79 |       |
| ZNF80       | 7634   | NM_007136    | 14478 | 0.94  | -0.59 | -0.16 | -0.07 | 0.82  | 0.02  | -0.83 | -0.72 | -0.23 | -1.69 | 0.76  | -1.79 |       |
| LOC343071   | 343071 | NM_001039361 | 14479 | 0.00  | -0.52 | -0.43 | 1.15  | 0.53  | 0.73  | -0.63 | -0.63 | -0.63 | -0.09 | 1.60  | -1.79 |       |
| GLI2        | 2736   | NM_005270    | 14480 | 0.46  | 0.93  | 0.12  | 2.19  | 3.21  | 2.93  | -0.65 | -0.48 | -0.66 | 1.51  | 8.33  | -1.79 |       |
| NC4         | 4689   | NM_000631    | 14481 | -0.80 | -0.23 | -0.79 | 0.62  | 1.00  | -0.80 | -0.86 | -0.44 | -0.49 | -1.82 | 0.82  | -1.79 |       |
| LOC12       | 2614   | NM_0010557   | 14482 | -0.65 | -0.64 | -0.66 | -0.61 | -0.66 | -0.61 | -0.66 | -0.61 | -0.66 | -1.96 | 0.31  | -1.79 |       |
| RNF150      | 57484  | NM_020724    | 14483 | 0.92  | 1.45  | 1.19  | 2.79  | 3.35  | 4.27  | 0.43  | -0.42 | -0.94 | 3.66  | 10.41 | -1.79 |       |
| GFER        | 2671   | NM_005262    | 14484 | -0.54 | 0.24  | -1.39 | -1.11 | 0.75  | -1.28 | -0.87 | -0.07 | -0.99 | -1.68 | 0.58  | -1.79 |       |
| FBXL7       | 23394  | NM_012104    | 14485 | -0.77 | -1.08 | -0.53 | -0.72 | -0.55 | -0.44 | -0.54 | -0.75 | -0.50 | -2.38 | -1.70 | -1.79 |       |
| ZNF575      | 28436  | NM_174945    | 14486 | 0.57  | -1.02 | 0.32  | 7.59  | 4.08  | 4.19  | -0.23 | -0.79 | -0.23 | 0.29  | 6.15  | -1.79 |       |
| CCR9        | 10803  | NM_006641    | 14487 | -0.75 | -1.07 | -0.92 | -0.07 | -0.13 | 0.57  | -0.23 | -0.84 | -0.72 | -2.74 | 0.37  | -1.79 |       |
| HOMER2      | 9455   | NM_199131    | 14488 | -0.74 | -0.78 | -0.93 | -0.14 | -0.09 | 0.15  | -0.73 | -0.61 | -0.45 | -2.43 | -0.11 | -1.79 |       |
| NFY155      | 9651   | NM_004298    | 14489 | -0.98 | -1.68 | -1.68 | -0.98 | -1.68 | -1.68 | -0.98 | -1.68 | -1.68 | -2.52 | 2.05  | -1.79 |       |
| CF54        | 10898  | NM_006693    | 14490 | -0.40 | -0.34 | -1.17 | 0.25  |       |       |       |       |       |       |       |       |       |

|              |          |              |       |       |       |       |       |       |       |       |       |       |       |       |       |
|--------------|----------|--------------|-------|-------|-------|-------|-------|-------|-------|-------|-------|-------|-------|-------|-------|
| PHR2         | 5746     | NM_005048    | 14573 | -0.46 | -0.61 | -0.44 | 0.94  | 0.98  | 0.26  | -0.70 | -0.59 | 0.54  | -1.50 | 2.18  | -1.83 |
| PHR8         | 10325    | NM_005054    | 14574 | -0.27 | -0.65 | -0.62 | 0.86  | 0.98  | 0.47  | -0.67 | -1.29 | -0.62 | -1.12 | 1.94  | -1.83 |
| LOC5C2433    | 624533   | NM_941875    | 14575 | 5.87  | 5.50  | 4.89  | 15.51 | 10.79 | 10.67 | 9.46  | -0.64 | -0.73 | 18.20 | 36.97 | -1.83 |
| KNCT         | 10089    | NM_033347    | 14576 | -0.53 | -0.25 | 0.05  | -0.03 | 0.49  | 0.55  | -0.67 | -0.54 | -0.61 | -0.73 | 1.01  | -1.83 |
| DN322A       | 79692    | NM_024639    | 14577 | 0.20  | 0.45  | 0.76  | 2.71  | 2.23  | 1.08  | -0.90 | -0.73 | -0.20 | 1.42  | 6.01  | -1.83 |
| LCN9B        | 118      | NM_000985    | 14578 | 1.13  | 1.13  | 0.53  | 0.78  | 0.53  | 0.80  | -0.53 | -0.67 | -0.67 | 0.58  | 4.92  | -1.83 |
| LOC375759    | 375759   | NM_199350    | 14579 | 0.07  | 0.45  | -0.07 | 1.48  | 1.72  | 3.91  | -0.57 | -0.34 | -0.92 | 0.45  | 7.10  | -1.83 |
| PLRKH4       | 57664    | NM_020904    | 14580 | -0.24 | 0.47  | -0.35 | 0.89  | 0.66  | 0.40  | -0.62 | -0.42 | -0.78 | -0.12 | 1.94  | -1.83 |
| RIAA1185     | 57470    | NM_018710    | 14581 | 1.08  | 0.46  | 0.60  | 1.08  | 0.46  | 0.60  | -0.62 | -0.42 | -0.78 | -0.12 | 1.94  | -1.83 |
| C1GAL12      | 29071    | NM_00101551  | 14582 | -0.87 | 0.07  | -0.38 | 0.68  | 0.29  | 0.62  | -0.92 | -0.20 | -0.71 | -1.18 | 1.59  | -1.83 |
| PR5111       | 22183    | NM_175886    | 14583 | 0.30  | -0.38 | -0.20 | 0.70  | 0.65  | 0.46  | -0.68 | -0.72 | -0.43 | -0.89 | 1.81  | -1.83 |
| LOC4248262   | 34248262 | NM_000391367 | 14584 | 0.11  | -0.37 | -0.02 | 0.11  | -0.37 | -0.02 | -0.32 | -0.42 | -0.11 | -0.37 | -0.02 | -1.83 |
| ASP          | 83853    | NM_031916    | 14585 | -0.76 | -0.83 | -0.09 | 0.28  | 1.35  | 0.01  | -0.79 | -0.98 | -0.06 | -1.67 | 1.83  | -1.83 |
| RIAA1280     | 55841    | NM_015691    | 14586 | -0.93 | -1.23 | -1.22 | 0.30  | -0.41 | -0.01 | -0.27 | -0.68 | -0.89 | -3.38 | -1.12 | -1.83 |
| MG2C5994     | 403434   | NM_203454    | 14587 | -0.67 | -0.26 | -1.04 | -0.85 | 0.13  | 0.01  | -0.42 | -0.55 | -0.85 | -1.96 | -0.71 | -1.83 |
| MTM1         | 4534     | NM_000032    | 14588 | -0.64 | -0.19 | 0.04  | 2.12  | 1.25  | 1.05  | -1.01 | -0.65 | -0.17 | -0.74 | 4.42  | -1.83 |
| NAP15        | 266812   | NM_153757    | 14589 | -0.13 | -0.57 | -1.12 | -0.12 | -0.38 | -0.28 | -0.37 | -0.53 | -0.93 | -1.81 | -0.77 | -1.83 |
| AP           | 9049     | NM_003977    | 14590 | -0.79 | -0.23 | 0.32  | 0.21  | 0.31  | 0.54  | -0.94 | -0.59 | -0.31 | -0.70 | 1.06  | -1.83 |
| ARL8         | 221079   | NM_178815    | 14591 | -0.28 | -0.59 | 0.11  | 0.28  | 0.72  | 0.75  | -0.43 | -0.78 | -0.62 | -0.76 | 1.75  | -1.83 |
| KRTHA8       | 8687     | NM_006771    | 14592 | -0.69 | -0.77 | -0.99 | -0.13 | -0.33 | -0.06 | -0.56 | -0.61 | -0.66 | -2.45 | -0.52 | -1.83 |
| MPF7         | 143098   | NM_173496    | 14593 | -0.99 | -0.44 | -0.89 | -0.01 | 0.42  | -0.66 | -0.90 | -0.44 | -0.49 | -2.32 | -0.26 | -1.83 |
| NUM41        | 4936     | NM_006185    | 14594 | -1.52 | -1.76 | -1.90 | -2.21 | -2.53 | -1.89 | -0.79 | -0.23 | -0.82 | -5.18 | -6.63 | -1.83 |
| MGCL5407     | 112942   | NM_080667    | 14595 | -0.69 | -1.16 | -1.02 | -0.76 | -0.95 | -0.30 | -0.50 | -0.46 | -0.87 | -2.88 | 2.01  | -1.83 |
| CTORF10      | 79783    | NM_024728    | 14596 | -0.16 | -0.38 | -0.13 | 1.61  | 1.39  | 0.85  | -0.75 | -0.53 | -0.55 | -0.68 | 3.85  | -1.83 |
| PCDH9        | 5101     | NM_020403    | 14597 | -0.34 | 0.52  | 0.68  | 2.35  | 1.52  | 3.94  | -0.63 | -0.35 | -0.86 | 1.55  | 7.42  | -1.84 |
| SCMH1        | 22952    | NM_021236    | 14598 | -0.12 | 0.30  | -0.38 | 2.76  | 1.97  | 2.43  | -0.78 | -0.02 | -1.01 | -0.20 | 7.17  | -1.84 |
| AGXT         | 189      | NM_000030    | 14599 | -0.20 | -1.38 | -1.31 | 0.46  | 0.53  | -0.36 | 0.00  | -0.97 | -0.87 | -2.88 | 0.64  | -1.84 |
| TMEM166      | 202859   | NM_213999    | 14600 | -0.09 | -0.59 | -0.36 | 1.57  | 0.65  | 0.23  | -0.73 | -0.58 | -0.53 | -1.03 | 1.98  | -1.84 |
| ENF35        | 641      | NM_046012    | 14601 | -0.32 | -0.39 | -0.60 | 0.80  | 0.48  | 0.90  | -0.48 | -0.50 | -0.46 | -1.30 | 2.51  | -1.84 |
| MG4C54       | 127002   | NM_153340    | 14602 | -0.25 | -0.67 | -0.14 | 1.29  | 0.81  | 0.91  | -0.70 | -0.58 | -0.29 | -1.07 | 3.01  | -1.84 |
| GLP2R        | 9340     | NM_004246    | 14603 | -0.92 | -0.95 | -0.75 | 0.80  | 0.84  | -0.21 | -0.73 | -0.76 | -0.31 | -2.63 | 1.43  | -1.84 |
| HL1          | 5347     | NM_000200    | 14604 | -1.80 | -1.80 | -1.00 | -0.20 | -0.20 | -0.20 | -0.25 | -2.50 | -0.80 | -5.58 | -6.89 | -1.84 |
| PMS1         | 5378     | NM_000534    | 14605 | -0.37 | 0.05  | -0.53 | 0.97  | 1.19  | 0.71  | -0.60 | -0.29 | -0.94 | -0.96 | 2.87  | -1.84 |
| OHX10        | 3206     | NM_153715    | 14606 | -0.80 | -0.86 | -1.20 | -0.42 | -0.49 | -0.45 | -0.32 | -0.62 | -0.90 | -2.86 | -1.36 | -1.84 |
| ORX1         | 39292    | NM_080809    | 14607 | 0.36  | -0.84 | -0.87 | 0.27  | 1.24  | 0.07  | -0.21 | -1.00 | -0.85 | -1.26 | 1.58  | -1.84 |
| EB2          | 1880     | NM_008951    | 14608 | -0.47 | -0.09 | -0.31 | 0.67  | 0.57  | 0.60  | -0.66 | -0.56 | -0.60 | -0.69 | 2.24  | -1.84 |
| LOC100127885 | 1E-408   | NM_001130446 | 14609 | -0.50 | -0.65 | -1.12 | 0.68  | 0.97  | 0.42  | -0.34 | -0.99 | -0.51 | -1.28 | 2.07  | -1.84 |
| SLBP         | 7884     | NM_006527    | 14610 | -1.37 | -0.95 | -1.16 | -1.79 | -1.47 | -1.47 | -1.74 | -0.64 | -0.46 | -3.48 | -4.72 | -1.84 |
| ENR1         | 5458     | NM_000541    | 14611 | -0.46 | -0.24 | -0.42 | 0.49  | 0.70  | 0.47  | -0.42 | -0.49 | -0.47 | -1.13 | 1.69  | -1.84 |
| H4D18        | 3032     | NM_000183    | 14612 | -1.01 | -1.07 | -0.02 | -0.07 | -0.14 | 0.56  | -0.71 | -1.04 | -0.08 | -2.09 | 0.35  | -1.84 |
| EXOC3        | 51010    | NM_00102069  | 14613 | -0.98 | -0.59 | -1.07 | -0.44 | -0.05 | -1.18 | -0.82 | -0.20 | -0.82 | -2.65 | -0.67 | -1.84 |
| LOC4248262   | 64832    | NM_000391367 | 14614 | -0.30 | 0.49  | -0.25 | 1.75  | 1.45  | 0.58  | -0.78 | -0.63 | -0.44 | -0.44 | 4.63  | -1.84 |
| LOC441150    | 441150   | NM_001008739 | 14615 | -0.97 | -0.69 | -0.97 | 0.23  | -0.64 | 0.34  | -0.63 | -0.34 | -0.87 | -2.33 | -0.07 | -1.84 |
| UR12G2       | 7327     | NM_003343    | 14616 | -0.64 | -0.67 | -0.76 | 2.09  | 2.10  | 0.67  | -0.94 | -0.38 | -0.52 | -2.06 | 4.87  | -1.84 |
| CIDORF93     | 255252   | NM_173572    | 14617 | -1.03 | -0.32 | -0.14 | 0.77  | 0.03  | 0.47  | -0.97 | -0.34 | -0.53 | -1.50 | 1.27  | -1.84 |
| FBDU16       | 157376   | NM_172366    | 14618 | -0.97 | -0.72 | -1.14 | 0.72  | 0.72  | 0.41  | -0.72 | -0.92 | -0.72 | -2.82 | 2.97  | -1.84 |
| AEP          | 158056   | NM_206920    | 14619 | -0.14 | -0.81 | 0.62  | 2.77  | 2.79  | 2.21  | -0.75 | -0.69 | -0.40 | -1.28 | 7.77  | -1.84 |
| MPN          | 83886    | NM_031948    | 14620 | -1.19 | -1.21 | -1.05 | -0.38 | 0.12  | -0.64 | -0.67 | -0.66 | -0.51 | -3.45 | -0.90 | -1.84 |
| PTGFR3       | 24237    | NM_00105522  | 14621 | -0.18 | -0.42 | -0.40 | 0.72  | 0.72  | 0.41  | -0.72 | -0.92 | -0.72 | -2.82 | 2.97  | -1.84 |
| DESC1        | 28983    | NM_014058    | 14622 | -0.29 | -0.36 | -0.64 | 2.18  | 1.23  | 1.84  | -0.70 | -0.43 | -0.71 | -1.29 | 5.25  | -1.84 |
| KN2C         | 3776     | NM_014217    | 14623 | -0.77 | -0.59 | -0.31 | 0.47  | 0.22  | 0.67  | -0.88 | -0.47 | -0.50 | -1.67 | 1.36  | -1.84 |
| FL10B07      | 5517     | NM_003563    | 14624 | -1.05 | -1.16 | -0.53 | -0.72 | -0.42 | -0.39 | -0.88 | -0.63 | -0.72 | -1.44 | -0.14 | -1.84 |
| QP-C         | 27989    | NM_014402    | 14625 | -2.04 | -1.91 | -3.55 | -2.55 | -3.04 | -2.38 | -0.78 | -0.32 | -1.38 | -6.50 | -7.97 | -1.84 |
| RNPEP1       | 57140    | NM_018226    | 14626 | -0.16 | -0.06 | 0.17  | 0.07  | 0.76  | 1.17  | -0.51 | -0.61 | -0.72 | -0.05 | 2.00  | -1.84 |
| SLCB1        | 6546     | NM_021297    | 14627 | -0.38 | -0.69 | -0.42 | -0.26 | -0.43 | 0.24  | -0.63 | -0.68 | -0.53 | -1.49 | -0.45 | -1.84 |
| TNFSF5P1     | 5698     | NM_000232    | 14628 | 0.16  | -0.23 | -0.29 | 0.71  | 0.31  | 0.29  | -0.71 | -0.31 | -0.29 | -0.50 | 2.00  | -1.84 |
| LTK          | 4018     | NM_206961    | 14629 | -0.21 | -0.68 | -0.68 | 0.47  | 0.77  | 0.13  | -0.66 | -0.61 | -0.57 | -1.57 | 1.37  | -1.84 |
| ANGP4        | 51378    | NM_015985    | 14630 | -0.40 | 0.13  | -0.38 | 0.28  | 0.36  | 0.68  | -0.64 | -0.46 | -0.74 | -0.64 | 1.33  | -1.84 |
| LOC295606052 | 2696     | NM_001605    | 14631 | -0.78 | -1.00 | -0.67 | 0.66  | 0.66  | 0.11  | -0.78 | -1.00 | -0.67 | -1.59 | 0.88  | -1.84 |
| PTGER3       | 5733     | NM_198720    | 14632 | -0.22 | -0.03 | -0.16 | 0.09  | 0.82  | 0.16  | -0.57 | -0.74 | -0.54 | -0.41 | 1.07  | -1.85 |
| ORX1         | 390157   | NM_00102907  | 14633 | -0.19 | -0.53 | -0.39 | 0.69  | 0.98  | 0.68  | -0.78 | -0.59 | -0.48 | -1.10 | 2.35  | -1.85 |
| LOC345655    | 345655   | NM_001217992 | 14634 | -0.26 | 0.04  | -0.46 | 0.71  | 1.85  | 1.36  | -0.66 | -0.53 | -0.63 | -0.25 | 3.93  | -1.85 |
| CDORF111     | 51526    | NM_016470    | 14635 | -0.19 | -0.68 | -0.31 | 0.68  | -0.29 | 0.76  | -0.52 | -0.54 | -0.78 | -1.15 | 1.85  | -1.85 |
| MG2477       | 79081    | NM_024099    | 14636 | -0.77 | -0.46 | -0.47 | -0.07 | -0.29 | 0.73  | -0.67 | -0.57 | -0.61 | -1.71 | 0.37  | -1.85 |
| ORX1         | 390157   | NM_00102907  | 14637 | -0.19 | -0.78 | -0.58 | 0.57  | 0.73  | -0.23 | -0.69 | -0.66 | -0.50 | -1.79 | 0.88  | -1.85 |
| ATP5D        | 51       | NM_001001975 | 14638 | 0.77  | 1.21  | 0.82  | 0.44  | 0.48  | 0.48  | -0.44 | -0.48 | -0.48 | -0.44 | 0.88  | -1.85 |
| FL2341       | 79731    | NM_024678    | 14639 | -0.14 | 1.09  | 0.06  | 2.27  | 1.82  | 1.89  | -0.60 | -0.39 | -0.85 | 1.34  | 5.98  | -1.85 |
| KRCC2        | 7516     | NM_005491    | 14640 | -0.43 | -1.01 | -0.75 | -0.28 | 0.04  | 0.58  | -0.16 | -0.88 | -0.82 | -2.19 | 0.34  | -1.85 |
| GPC          | 2358     | NM_000151    | 14641 | -0.86 | -0.98 | -0.76 | 0.68  | 0.68  | 0.68  | -0.68 | -0.68 | -0.68 | -0.68 | 0.68  | -1.85 |
| DNCL2B       | 83657    | NM_130897    | 14642 | -0.08 | -0.45 | -0.82 | 0.26  | 0.71  | 0.75  | -0.13 | -0.89 | -0.83 | -1.35 | 1.72  | -1.85 |
| PLD1         | 5333     | NM_006225    | 14643 | -0.28 | -0.77 | -0.80 | 0.61  | -0.72 | 0.31  | -0.69 | -0.34 | -0.82 | -1.85 | 0.21  | -1.85 |
| LOC345655    | 345655   | NM_001217992 | 14644 | -0.56 | -0.76 | -0.39 | 0.86  | 0.66  | 0.11  | -0.39 | -0.31 | -0.73 | -1.70 | 1.54  | -1.85 |
| APTX         | 54840    | NM_175071    | 14645 | -0.27 | -0.22 | -0.39 | 2.33  | 1.46  | 1.53  | -0.77 | -0.63 | -0.45 | -5.31 | 3.95  | -1.85 |
| WFDC12       | 128488   | NM_080869    | 14646 | 0.11  | -0.32 | -0.19 | 1.05  | 0.50  | 0.82  | -0.76 | -0.64 | -0.44 | -0.40 | 2.37  | -1.85 |
| COI15        | 51018    | NM_016452    | 14647 | -0.47 | -0.10 | -0.68 | 1.30  | 0.72  | 1.30  | -0.72 | -0.41 | -0.73 | -1.04 | 3.29  | -1.85 |
| SERNM5       | 5208     | NM_006139    | 14648 | -1.24 | -1.28 | -1.42 | -1.62 | -1.62 | -1.62 | -0.42 | -0.93 | -0.69 | -3.69 | 6.89  | -1.85 |
| ATRN1        | 26033    | NM_207303    | 14649 | -1.21 | -1.28 | -1.46 | -2.09 | 0.09  | -0.38 | -0.48 | -0.46 | -0.91 | -3.96 | -2.37 | -1.85 |
| UST          | 10099    | NM_005715    | 14650 | -0.54 | -0.01 | -0.77 | 0.68  | 0.65  | 0.28  | -0.67 | -0.52 | -0.66 | -1.30 | 1.61  | -1.85 |
| IRK51        | 22007    | NM_145309    | 14651 | 0.80  | 0.86  | 0.24  | 0.86  | 0.24  | 0.86  | -0.14 | -0.59 | -0.14 | -1.90 | 4.68  | -1.85 |
| KRYB83       | 1417     | NM_004076    | 14652 | -0.55 | -0.54 | -0.65 | 0.87  |       |       |       |       |       |       |       |       |

|              |        |              |       |       |       |       |       |       |       |       |       |       |       |       |       |
|--------------|--------|--------------|-------|-------|-------|-------|-------|-------|-------|-------|-------|-------|-------|-------|-------|
| GAGE2        | 2574   | NM_001472    | 14735 | -0.82 | -0.78 | -0.95 | -1.06 | 0.04  | -0.18 | -0.46 | -0.56 | -0.86 | -2.55 | -1.20 | -1.88 |
| FP15C        | 5482   | NM_022284    | 14736 | 0.00  | -0.28 | -0.74 | -1.24 | 1.61  | 2.32  | -0.39 | -0.42 | -1.08 | -1.74 | -1.12 | -2.91 |
| NPM1         | 4869   | NM_00103738  | 14737 | -0.71 | -0.33 | -0.79 | 0.94  | 0.72  | 0.04  | -0.85 | -0.66 | -0.36 | -1.84 | 1.70  | -1.88 |
| VIP          | 7432   | NM_194435    | 14738 | -0.46 | -0.50 | 0.25  | 0.41  | 0.83  | -0.21 | -0.77 | -0.89 | -0.21 | -0.72 | 1.04  | -1.88 |
| STK24        | 8428   | NM_003576    | 14739 | -0.89 | -0.72 | -1.29 | -0.08 | -0.39 | 0.12  | -0.57 | -0.10 | -1.21 | -2.90 | -0.35 | -1.88 |
| WHD27        | 5104   | NM_002436    | 14740 | -1.89 | -1.89 | -1.76 | -1.02 | 2.87  | 2.07  | -2.38 | -0.95 | -3.07 | -0.70 | 0.82  | -1.88 |
| PSCD3        | 9265   | NM_004227    | 14741 | -0.71 | -1.01 | -0.38 | 2.00  | 1.51  | 0.89  | -0.77 | -0.84 | -0.27 | -1.40 | -1.40 | -1.88 |
| ZNF263       | 9831   | NM_014789    | 14742 | -0.92 | -0.59 | 0.00  | 0.86  | 0.84  | -0.04 | -0.86 | -0.93 | -0.09 | -1.52 | 1.65  | -1.88 |
| BDX1         | 8454   | NM_003986    | 14743 | -0.53 | -1.10 | -0.04 | -0.10 | 1.00  | 1.00  | -1.16 | -0.10 | -0.70 | -1.62 | 1.97  | -1.88 |
| GLRA1        | 2741   | NM_000171    | 14744 | 0.91  | -0.55 | 0.99  | 2.84  | 2.21  | 3.07  | -0.48 | -1.00 | -0.40 | 1.35  | 8.12  | -1.88 |
| SYTR         | 90019  | NM_138567    | 14745 | -1.14 | -1.04 | -0.99 | -0.72 | -0.80 | -1.07 | -0.78 | -0.74 | -0.36 | -3.16 | -2.58 | -1.88 |
| LOC100302026 | 5149   | NM_002026    | 14746 | -1.26 | 0.14  | -0.01 | -0.49 | -0.73 | -1.49 | -0.43 | -0.74 | -0.41 | -0.11 | 3.16  | -1.88 |
| KLK7         | 5650   | NM_139277    | 14747 | -1.15 | -0.97 | -0.67 | -0.64 | 0.74  | 0.76  | -0.56 | -0.18 | -0.74 | -2.79 | 0.86  | -1.88 |
| SPS2         | 84727  | NM_032641    | 14748 | -0.77 | 0.84  | -0.67 | 1.34  | 0.81  | 0.68  | -0.93 | -0.25 | -0.70 | -0.60 | 2.83  | -1.88 |
| SHNT2        | 10653  | NM_021102    | 14749 | -0.01 | -0.47 | -0.83 | 0.53  | 1.56  | 1.14  | -0.25 | -0.67 | -0.96 | -1.29 | 3.23  | -1.88 |
| FLJ39554     | 32480  | NM_152344    | 14750 | -1.08 | -1.28 | -1.32 | -0.62 | -1.09 | -0.65 | -0.41 | -0.72 | -0.76 | -3.68 | -0.37 | -1.88 |
| IMP2         | 50939  | NM_016247    | 14751 | -0.79 | 0.46  | 0.10  | 1.72  | 0.95  | 0.93  | -1.09 | -0.34 | -0.46 | -0.22 | 3.60  | -1.88 |
| GMRF-1       | 84280  | NM_032320    | 14752 | -0.56 | -1.00 | -0.64 | -0.20 | 0.54  | 0.48  | -0.48 | -0.70 | -0.71 | -1.30 | 0.82  | -1.88 |
| C20ORF70     | 34063  | NM_080574    | 14753 | -0.83 | 0.66  | -0.52 | 0.77  | 0.85  | 0.97  | -0.66 | -0.68 | -0.54 | -2.42 | 2.59  | -1.88 |
| C20ORF155    | 54575  | NM_019095    | 14754 | -0.59 | 0.61  | -1.07 | 0.59  | 1.00  | 0.48  | -0.69 | -0.44 | -0.76 | -2.27 | 2.07  | -1.88 |
| CKAP2        | 26586  | NM_018204    | 14755 | 0.11  | -0.30 | -0.45 | 0.75  | 0.38  | 0.25  | -0.52 | -0.68 | -0.68 | -0.64 | 1.39  | -1.88 |
| NCAB1        | 7881   | NM_172160    | 14756 | -0.17 | -0.49 | -0.79 | 0.40  | 0.30  | -0.24 | -0.57 | -0.66 | -0.66 | -1.45 | 0.66  | -1.88 |
| OR5M8        | 21944  | NM_001005282 | 14757 | -0.19 | -0.33 | -0.55 | 2.01  | 1.42  | 2.14  | -0.28 | -0.49 | -1.11 | -1.08 | 5.57  | -1.88 |
| GBG1         | 26301  | NM_021996    | 14758 | -0.21 | -0.47 | -2.37 | -0.51 | -0.66 | 3.97  | -0.06 | -0.18 | -1.65 | -3.05 | 2.80  | -1.88 |
| Clorf96      | 174355 | NM_198515    | 14759 | -1.19 | -0.20 | -0.37 | 0.40  | 0.46  | 0.79  | -0.53 | -0.61 | -0.74 | -0.76 | 1.85  | -1.88 |
| OS1054       | 390264 | NM_001004642 | 14760 | -0.23 | -1.13 | -0.93 | -0.12 | -0.14 | 0.66  | -0.14 | -0.86 | -0.89 | -2.29 | 0.39  | -1.88 |
| RNF10        | 9921   | NM_014868    | 14761 | 2.24  | 1.29  | 0.68  | 5.88  | 3.66  | 4.82  | -0.57 | -0.64 | -0.67 | 4.21  | 14.36 | -1.88 |
| BET1         | 10292  | NM_005868    | 14762 | -0.62 | 0.44  | -0.24 | -1.89 | 2.49  | 2.23  | -0.12 | -0.74 | -1.04 | -0.82 | 6.62  | -1.88 |
| TRIM27       | 22643  | NM_178820    | 14763 | -1.09 | -1.32 | -1.40 | -1.12 | -1.07 | -0.93 | -0.82 | -0.70 | -0.81 | -2.81 | 2.88  | -1.88 |
| TRIM46       | 80128  | NM_025058    | 14764 | -1.03 | -1.23 | -0.08 | 0.78  | 1.00  | 4.12  | -1.70 | -0.60 | -0.59 | -2.18 | 5.90  | -1.88 |
| FARS2        | 10667  | NM_006567    | 14765 | -0.72 | -0.72 | -0.84 | 0.69  | 0.90  | -0.07 | -0.82 | -0.41 | -0.66 | -2.28 | 1.52  | -1.88 |
| HR           | 489    | NM_001621    | 14766 | -1.14 | 0.12  | -0.12 | -1.12 | 0.12  | -0.12 | -1.11 | -0.36 | -0.12 | -1.33 | 2.58  | -1.88 |
| CLORF46      | 91759  | NM_00102474  | 14767 | -0.83 | -0.56 | -1.02 | 0.03  | 0.07  | -0.03 | -0.67 | -0.54 | -0.68 | -2.41 | 0.07  | -1.88 |
| MRPS12       | 6183   | NM_033363    | 14768 | -0.61 | -1.10 | -0.62 | -0.58 | 0.08  | 0.71  | -0.29 | -1.01 | -0.59 | -2.32 | 0.21  | -1.88 |
| ZNF81        | 34734  | NM_007137    | 14769 | -0.28 | -0.57 | -0.83 | 0.70  | 0.56  | 0.46  | -0.51 | -0.64 | -0.74 | -1.67 | 1.72  | -1.88 |
| WDR22        | 8612   | NM_003961    | 14770 | -0.43 | -0.48 | -0.36 | -0.42 | -0.62 | -0.62 | -0.56 | -0.62 | -0.56 | -1.27 | 1.12  | -1.88 |
| TNS          | 7145   | NM_022648    | 14771 | -0.71 | -0.03 | -0.48 | 1.43  | 1.37  | 0.42  | -0.81 | -0.61 | -0.46 | -1.22 | 3.21  | -1.88 |
| IRC17        | 10234  | NM_001031692 | 14772 | -0.48 | -1.11 | -0.51 | -1.06 | 0.11  | 0.32  | -0.26 | -1.01 | -0.62 | -2.10 | -0.62 | -1.88 |
| CCX41        | 9487   | NM_003615    | 14773 | -1.28 | -0.37 | -0.70 | -1.17 | 0.28  | -0.17 | -0.69 | -0.26 | -0.78 | -0.47 | 2.49  | -1.88 |
| HSPC154      | 29900  | NM_014177    | 14774 | -0.41 | -0.42 | -0.45 | 0.34  | 0.65  | 1.07  | -0.63 | -0.57 | -0.69 | -1.28 | 2.06  | -1.88 |
| SART2        | 29940  | NM_001089976 | 14775 | -0.35 | -0.51 | 0.32  | 0.54  | 1.36  | 1.89  | -0.41 | -0.93 | -0.55 | -0.53 | 3.80  | -1.88 |
| LOC100310    | 5533   | NM_00100310  | 14776 | -0.45 | -0.25 | -0.11 | -0.40 | -0.25 | -0.11 | -0.40 | -0.25 | -0.11 | -0.71 | 0.29  | -1.88 |
| PFS2         | 51659  | NM_016095    | 14777 | -0.46 | 0.90  | -0.89 | -0.14 | 0.18  | 0.14  | -0.32 | -0.76 | -0.81 | -0.38 | 0.18  | -1.88 |
| ILIR2        | 7850   | NM_173343    | 14778 | -0.62 | -0.49 | -0.17 | 0.66  | 0.60  | 0.75  | -0.72 | -0.77 | -0.41 | -1.28 | 2.01  | -1.88 |
| HSPC152      | 51504  | NM_016404    | 14779 | -0.81 | -0.88 | -0.87 | -0.45 | -0.61 | -0.23 | -0.76 | -0.44 | -0.70 | -2.37 | -1.29 | -1.88 |
| ZNF623       | 2282   | NM_003820    | 14780 | -0.76 | -0.50 | -0.26 | -0.60 | -0.87 | -0.60 | -0.87 | -0.60 | -0.50 | -1.51 | 1.25  | -1.88 |
| HRX          | 8739   | NM_003806    | 14781 | -0.79 | -0.01 | -0.28 | 0.64  | 1.01  | 1.36  | -0.95 | -0.45 | -0.49 | -1.08 | 3.01  | -1.88 |
| PTPRM        | 5797   | NM_002945    | 14782 | -0.24 | 0.49  | 0.41  | 1.56  | 1.95  | 3.73  | -0.82 | -0.47 | -0.60 | -0.67 | 7.25  | -1.88 |
| TRISX1       | 21579  | NM_145207    | 14783 | -0.62 | -0.59 | -0.62 | -0.67 | -0.76 | -0.67 | -0.67 | -0.76 | -0.67 | -1.81 | 0.14  | -1.88 |
| BCD1         | 636    | NM_00100398  | 14784 | -0.21 | -0.91 | -0.67 | 0.91  | 0.82  | 1.25  | -0.45 | -0.85 | -0.59 | -1.79 | 2.98  | -1.88 |
| HMG2A        | 8091   | NM_003484    | 14785 | -0.96 | -0.72 | -0.78 | -0.27 | -0.61 | -0.08 | -0.87 | -0.36 | -0.67 | -2.46 | -0.94 | -1.88 |
| ZFP90        | 2722   | NM_001640    | 14786 | -1.06 | -1.25 | -0.60 | -1.50 | 1.25  | -0.60 | -1.50 | 1.25  | -0.60 | -4.04 | 4.08  | -1.88 |
| LOC155435    | 355435 | NM_003043    | 14787 | -1.76 | -1.70 | -1.81 | -0.65 | -1.11 | -0.58 | -1.23 | -0.39 | -1.06 | -4.27 | 2.34  | -1.88 |
| MCC          | 9973   | NM_005125    | 14788 | -0.24 | 0.12  | -0.65 | 1.14  | 0.38  | 0.94  | -0.77 | -0.19 | -0.94 | -0.29 | 2.45  | -1.88 |
| CLL1         | 79358  | NM_033467    | 14789 | 0.02  | -0.29 | -0.33 | 1.08  | 1.91  | 0.71  | -0.65 | -0.61 | -0.64 | -0.61 | 3.66  | -1.88 |
| LOC100477    | 23015  | NM_180177    | 14790 | -0.33 | -0.46 | -0.56 | 0.71  | 1.23  | 0.47  | -0.59 | -0.86 | -1.73 | -2.57 | 2.57  | -1.88 |
| PCSK5        | 5125   | NM_006200    | 14791 | -0.57 | -0.26 | -0.26 | 0.57  | 0.71  | 0.56  | -0.76 | -0.53 | -0.60 | -1.09 | 1.84  | -1.88 |
| FLJ12847     | 79648  | NM_024996    | 14792 | -0.44 | -0.28 | -0.35 | 1.43  | 2.43  | 2.90  | -0.32 | -0.77 | -0.81 | -0.19 | 6.75  | -1.88 |
| NFAP34       | 9020   | NM_003954    | 14793 | -0.06 | -0.40 | -0.40 | -0.06 | -0.40 | -0.40 | -0.06 | -0.40 | -0.40 | -0.06 | 1.63  | -1.88 |
| TTRK1        | 84630  | NM_023538    | 14794 | -0.77 | -1.01 | -0.36 | 1.23  | 0.14  | 0.78  | -0.66 | -0.75 | -0.49 | -1.18 | 1.87  | -1.88 |
| HST13A       | 8350   | NM_003929    | 14795 | -0.43 | -0.01 | -0.43 | 1.13  | 0.53  | 1.01  | -0.86 | -0.37 | -0.67 | -0.86 | 2.67  | -1.88 |
| TAR2         | 6891   | NM_018833    | 14796 | 0.71  | 0.51  | 0.79  | 1.99  | 3.89  | 2.40  | -0.54 | -0.49 | -0.74 | -2.01 | 7.48  | -1.88 |
| SCAR1        | 949    | NM_005505    | 14797 | -0.46 | -0.32 | -0.16 | 2.14  | 2.16  | 0.99  | -0.46 | -0.71 | -0.73 | -2.03 | 5.29  | -1.88 |
| HBZ          | 3050   | NM_005332    | 14798 | -0.47 | -0.95 | -0.89 | -0.84 | -0.39 | -0.80 | -0.35 | -0.88 | -0.68 | -2.30 | -2.02 | -1.88 |
| LOC284361    | 284361 | NM_206358    | 14799 | -0.25 | -0.37 | -0.56 | 1.73  | 1.44  | 1.99  | -0.47 | -0.51 | -0.52 | -0.68 | 5.16  | -1.88 |
| SCORL        | 9487   | NM_001199    | 14800 | -0.66 | -0.74 | -1.10 | -0.69 | -0.76 | -1.10 | -0.69 | -0.76 | -1.10 | -1.67 | 1.67  | -1.88 |
| SYNCRP       | 10492  | NM_006372    | 14801 | -0.39 | -0.31 | 0.62  | 1.29  | 2.55  | 1.50  | -0.71 | -0.77 | -0.42 | -0.80 | 5.34  | -1.88 |
| PCDH83       | 56132  | NM_018937    | 14802 | -0.55 | 0.28  | -0.75 | 0.18  | 0.97  | 0.16  | -0.82 | -0.37 | -0.71 | -1.02 | 1.31  | -1.88 |
| LOC30314     | 14832  | NM_023998    | 14803 | -0.39 | -0.41 | -0.39 | -0.12 | -0.34 | -0.12 | -0.34 | -0.12 | -0.34 | -0.39 | 1.36  | -1.88 |
| HKH          | 3795   | NM_000221    | 14804 | -0.27 | -0.49 | -0.68 | 1.30  | 1.59  | 1.10  | -0.51 | -0.82 | -0.57 | -1.45 | 3.99  | -1.88 |
| MRPS5        | 64689  | NM_031902    | 14805 | -0.07 | -0.25 | -0.00 | -0.01 | -0.40 | -0.14 | -0.47 | -0.63 | -0.80 | -1.22 | 0.25  | -1.88 |
| SOX11        | 2935   | NM_002944    | 14806 | -0.07 | -0.74 | -1.04 | -0.07 | -0.74 | -1.04 | -0.07 | -0.74 | -1.04 | -1.60 | 4.89  | -1.88 |
| PHH1         | 5554   | NM_006250    | 14807 | -0.82 | -0.83 | -0.60 | -0.10 | 0.31  | 1.19  | -0.67 | -0.68 | -0.55 | -2.25 | 0.02  | -1.88 |
| FXD3         | 5349   | NM_005971    | 14808 | -1.18 | -1.18 | -1.30 | -1.06 | -0.48 | -0.62 | -0.61 | -0.38 | -0.92 | -3.66 | -2.15 | -1.88 |
| COMMD7       | 149951 | NM_053041    | 14809 | -0.02 | -0.07 | -0.22 | 0.90  | 2.35  | 1.05  | -0.58 | -0.79 | -0.54 | -0.17 | 4.29  | -1.88 |
| PHF4         | 20076  | NM_152071    | 14810 | -0.18 | -0.86 | -1.01 | -0.84 | -1.04 | -0.41 | -0.02 | -0.46 | -0.59 | -2.05 | 2.29  | -1.88 |
| LOC221143    | 221143 | NM_174928    | 14811 | 0.22  | -0.18 | -0.30 | 2.28  | 1.55  | 1.06  | -0.77 | -0.61 | -0.52 | -0.26 | 4.89  | -1.88 |
| CLTN1        | 22883  | NM_014944    | 14812 | -1.15 | -0.97 | -0.91 | -0.74 | -0.52 | 0.08  | -0.64 | -0.53 | -0.74 | -3.03 | -1.18 | -1.88 |
| FCM11        | 2246   | NM_0014986   | 14813 | -0.22 | -1.01 | -1.60 | -0.22 | -1.01 | -1.60 | -0.22 | -1.01 | -1.60 | -2.01 | 0.53  | -1.88 |
| MGLT330      | 113791 | NM_052880    | 14814 | -1.25 | -1.30 | -0.40 | -0.57 | -0.57 | 0.00  | -0.67 | -0.90 | -0.33 | -2.94 | -1.14 |       |

|           |        |              |       |       |       |       |       |       |       |       |       |       |        |       |       |       |
|-----------|--------|--------------|-------|-------|-------|-------|-------|-------|-------|-------|-------|-------|--------|-------|-------|-------|
| DUSP3     | 1845   | NM_004090    | 14897 | -1.12 | -1.00 | -1.41 | -0.46 | -0.94 | -0.56 | -0.72 | -0.49 | 0.74  | -3.54  | -1.96 | -1.94 |       |
| FH3       | 24197  | NM_021244    | 14898 | -0.14 | -0.24 | -0.61 | -0.25 | -0.14 | -0.22 | -0.77 | -0.48 | 0.34  | -0.77  | -0.86 | -1.14 |       |
| FLU0521   | 55160  | NM_00101722  | 14899 | -0.82 | -0.62 | -0.82 | 0.04  | -0.49 | -0.54 | 0.63  | -0.58 | -0.73 | 2.26   | 1.07  | -1.94 |       |
| ADAM12    | 8038   | NM_021641    | 14900 | 1.02  | -0.25 | -0.02 | 0.49  | 0.34  | 0.35  | -0.94 | -0.32 | -0.68 | -1.29  | 1.18  | -1.94 |       |
| LOC130555 | 150553 | NM_00101927  | 14901 | -0.58 | -1.14 | -0.88 | -0.18 | 1.06  | 0.23  | -0.24 | -1.06 | -0.65 | -2.59  | 1.11  | -1.94 |       |
| PP4DC     | 5450   | NM_021740    | 14902 | 0.12  | 0.74  | 0.86  | 0.13  | 0.49  | -0.72 | 0.13  | 0.49  | -0.72 | 1.72   | 1.25  | -1.94 |       |
| SLG6A5    | 55117  | NM_018057    | 14903 | -0.74 | -1.01 | -0.81 | 1.45  | 0.89  | 1.35  | -0.49 | -1.02 | -0.44 | -2.56  | 3.68  | -1.94 |       |
| ZWNT      | 11330  | NM_00100543  | 14904 | -0.54 | 0.06  | -0.66 | 0.86  | 1.01  | 1.14  | -0.56 | -0.36 | -1.02 | -1.14  | 3.00  | -1.94 |       |
| MGC46161  | 5113   | NM_018057    | 14905 | 0.44  | 0.41  | 0.41  | 0.54  | 1.37  | 1.21  | 0.44  | -0.86 | -0.56 | 1.43   | 1.62  | -1.94 |       |
| NIN3K     | 51086  | NM_015978    | 14906 | -0.52 | -1.16 | -1.08 | 0.44  | -0.72 | -0.16 | -0.36 | -0.65 | -0.93 | -1.16  | -1.33 | -1.95 |       |
| P68D4     | 161779 | NM_152595    | 14907 | -0.36 | -0.06 | -0.83 | 0.08  | 1.48  | 0.30  | -0.52 | -0.63 | -0.80 | -1.25  | 1.86  | -1.95 |       |
| SNR1A2    | 8388   | NM_00101952  | 14908 | -0.67 | -0.56 | -0.16 | -0.66 | -0.46 | -0.85 | -0.67 | -0.46 | -0.85 | -1.29  | -0.89 | -1.95 |       |
| KIA1519   | 91749  | NM_153369    | 14909 | 0.26  | 0.63  | -0.50 | 0.64  | 0.53  | 1.17  | -0.48 | -0.66 | -0.81 | 0.66   | 2.34  | -1.95 |       |
| LATS2     | 26124  | NM_014572    | 14910 | -1.16 | -1.02 | -0.19 | 0.19  | 0.09  | -0.06 | -0.68 | -0.84 | -0.42 | -2.37  | 0.23  | -1.95 |       |
| PF3K2C    | 79837  | NM_024779    | 14911 | -1.21 | -0.79 | -0.67 | -0.53 | -0.60 | -0.09 | -0.86 | -0.52 | -0.57 | -2.68  | -1.18 | -1.95 |       |
| ORC15     | 55604  | NM_017040    | 14912 | -0.60 | -0.37 | 0.90  | 1.29  | 0.07  | 0.52  | -0.75 | -0.25 | -0.95 | -1.97  | 1.74  | -1.95 |       |
| SLC1246   | 9990   | NM_005135    | 14913 | -0.95 | -0.25 | -1.08 | 1.50  | 0.97  | 1.33  | -0.43 | -0.32 | -1.19 | -2.29  | 3.79  | -1.95 |       |
| FLU3793   | 129450 | NM_00103693  | 14914 | -0.01 | -0.37 | 0.26  | 0.78  | 0.39  | 1.90  | -0.69 | -0.57 | 0.70  | -0.12  | 3.08  | -1.95 |       |
| ATROV1C2  | 245973 | NM_144584    | 14915 | -0.79 | -0.75 | -0.76 | -0.48 | -0.25 | 1.03  | -0.62 | -0.44 | -0.88 | -2.31  | 0.20  | -1.95 |       |
| DDX47     | 51202  | NM_201224    | 14916 | -0.79 | -0.79 | -0.84 | 0.03  | -0.35 | -0.23 | -0.74 | -0.66 | -0.55 | -2.42  | 0.55  | -1.95 |       |
| KM2D58    | 553128 | NM_001018081 | 14917 | -0.22 | -0.09 | -0.14 | 2.44  | 1.95  | 1.01  | -0.83 | -0.83 | -0.29 | -0.17  | 5.40  | -1.95 |       |
| ACCP1D0   | 84164  | NM_021024    | 14918 | -0.68 | -0.62 | -1.09 | 0.00  | 0.71  | 0.37  | -0.44 | -0.76 | -0.75 | -2.40  | 1.09  | -1.95 |       |
| TMM17A    | 10440  | NM_006335    | 14919 | 0.46  | 0.58  | -0.21 | 2.08  | 1.06  | 1.54  | -0.71 | -1.00 | -0.24 | 1.25   | 4.67  | -1.95 |       |
| CPH43     | 10878  | NM_021023    | 14920 | 0.07  | -0.97 | -0.77 | 0.74  | 0.15  | 1.48  | -0.34 | -0.60 | -1.00 | -1.68  | 2.36  | -1.95 |       |
| UCT1A9    | 54500  | NM_021027    | 14921 | -0.49 | -0.32 | -0.01 | 2.22  | 0.73  | 0.51  | -0.78 | -0.65 | -0.52 | -0.82  | 3.46  | -1.95 |       |
| KC3L      | 283149 | NM_182057    | 14922 | -0.09 | 0.03  | 0.66  | 2.03  | 2.16  | 2.28  | 0.64  | -0.96 | 0.36  | 0.60   | 6.47  | -1.95 |       |
| PMP4      | 11264  | NM_183397    | 14923 | -0.51 | -0.93 | -0.94 | -0.58 | -0.75 | -0.09 | -0.46 | -0.68 | -0.81 | -2.38  | -1.43 | -1.95 |       |
| C10DRF2   | 143739 | NM_144661    | 14924 | -1.04 | -0.83 | -0.77 | -0.18 | -0.74 | 0.54  | -0.95 | -0.51 | -0.48 | -2.63  | -0.38 | -1.95 |       |
| PTP4      | 575    | NM_020300    | 14925 | -0.40 | 0.36  | -0.69 | 0.47  | 0.69  | 0.17  | -0.69 | -0.47 | -0.69 | -1.78  | 0.74  | -1.95 |       |
| AFK2      | 27301  | NM_014481    | 14926 | 0.37  | 0.16  | -1.15 | 2.83  | 3.32  | 1.83  | -0.78 | 0.06  | -1.23 | -0.62  | 7.98  | -1.95 |       |
| KIA1172   | 57186  | NM_020343    | 14927 | -1.16 | -0.53 | 0.22  | 2.45  | 0.99  | 1.14  | -0.84 | -0.90 | -0.21 | -0.46  | 4.59  | -1.95 |       |
| ARGK25    | 488    | NM_0010356   | 14928 | -0.35 | 0.20  | -0.12 | 1.04  | 0.88  | 1.20  | -0.88 | -1.12 | 0.174 | -0.17  | 5.52  | -1.95 |       |
| LOC73133  | 375133 | NM_199345    | 14929 | 0.00  | -0.25 | -0.51 | 1.04  | 0.56  | 0.58  | -0.54 | -0.64 | -0.78 | -0.77  | 2.18  | -1.95 |       |
| PCD11     | 22884  | NM_014976    | 14930 | -0.40 | -0.56 | 0.09  | 0.86  | 1.08  | 1.03  | -0.60 | -0.68 | -0.67 | -0.86  | 2.97  | -1.95 |       |
| MGC4466   | 28555  | NM_174952    | 14931 | -0.78 | -0.43 | -1.08 | -0.78 | -0.89 | 0.76  | -0.60 | -0.36 | -0.95 | -2.29  | -0.91 | -1.96 |       |
| TCN4      | 845    | NM_002093    | 14932 | -0.77 | -0.58 | -0.65 | 1.63  | 0.47  | 1.63  | -0.67 | -0.67 | -0.67 | -0.84  | 6.66  | -1.96 |       |
| SYNGR1    | 9145   | NM_145738    | 14933 | -0.50 | -0.08 | -0.49 | 2.18  | 1.59  | 1.31  | -0.89 | -0.26 | -0.80 | -1.45  | 5.09  | -1.96 |       |
| RPE       | 6120   | NM_006916    | 14934 | -0.33 | 0.31  | -0.49 | 0.82  | 0.89  | 0.20  | -0.85 | -0.47 | -0.63 | -0.51  | 1.91  | -1.96 |       |
| IRF4      | 9053   | NM_021027    | 14935 | -0.75 | -0.02 | -0.02 | 1.81  | 1.45  | 0.82  | -0.74 | -0.74 | -0.74 | -0.74  | 4.00  | -1.96 |       |
| PTX1      | 51290  | NM_016570    | 14936 | -0.50 | -0.21 | 0.12  | 0.23  | 1.28  | 1.71  | -0.59 | -0.69 | -0.68 | -0.60  | 3.23  | -1.96 |       |
| RAE19B    | 401409 | NM_001008749 | 14937 | -0.30 | -0.04 | -0.65 | -0.08 | 0.52  | 0.74  | -0.46 | -0.60 | -0.89 | -0.99  | 1.18  | -1.96 |       |
| RAE46C    | 3809   | NM_001008749 | 14938 | -0.55 | -0.38 | -0.20 | -0.76 | 1.39  | 1.67  | -0.55 | -0.55 | -0.55 | -1.33  | 1.86  | -1.96 |       |
| AGP11     | 28279  | NM_173039    | 14939 | -0.76 | 0.50  | -0.41 | 0.59  | -0.11 | 0.11  | -1.04 | -0.56 | -0.35 | -0.35  | 0.58  | -1.96 |       |
| SCUBE1    | 80274  | NM_173050    | 14940 | -0.70 | -0.52 | -0.51 | 0.54  | 0.19  | -0.43 | -0.90 | -0.61 | -0.45 | -1.73  | 0.31  | -1.96 |       |
| CAKIN2    | 57513  | NM_020753    | 14941 | -1.31 | -1.37 | -1.58 | -1.04 | -0.19 | -0.71 | -0.42 | -0.72 | -0.81 | -4.25  | -1.94 | -1.96 |       |
| DDH46B    | 92483  | NM_031395    | 14942 | -0.16 | 0.11  | -0.17 | 0.91  | 0.91  | 0.91  | -0.69 | -0.62 | -0.62 | -0.43  | 2.73  | -1.96 |       |
| LOC150084 | 150084 | NM_001800444 | 14943 | -0.83 | -0.70 | -0.65 | 0.01  | 0.50  | 0.87  | -0.43 | -0.66 | -0.66 | -2.18  | 1.47  | -1.96 |       |
| PEX5      | 51555  | NM_016559    | 14944 | -0.24 | -0.47 | 0.50  | 1.74  | 1.67  | 1.45  | -0.80 | -0.71 | -0.44 | 0.27   | 4.85  | -1.96 |       |
| PER4      | 9238   | NM_021912    | 14945 | -0.28 | -0.73 | -1.14 | -0.09 | 0.10  | -0.22 | -0.33 | -0.43 | -1.20 | -2.43  | 0.77  | -1.96 |       |
| FLU3469   | 79763  | NM_024710    | 14946 | -0.57 | -0.34 | -1.52 | -0.24 | -0.43 | -0.10 | -0.33 | -0.43 | -1.20 | -2.43  | 0.77  | -1.96 |       |
| C10RF43   | 10650  | NM_006553    | 14947 | -0.61 | -0.80 | -0.98 | 0.68  | 0.04  | 0.48  | -0.71 | -0.55 | -0.70 | -2.39  | 1.20  | -1.96 |       |
| ZNF17     | 7365   | NM_00103693  | 14948 | -0.61 | -0.33 | -0.69 | 0.65  | 1.18  | 0.65  | -1.43 | -0.66 | -0.89 | -0.83  | 2.37  | -1.96 |       |
| PF4A      | 849    | NM_015053    | 14949 | 0.54  | -0.25 | -0.14 | 1.04  | 1.77  | 1.21  | -0.74 | -0.72 | -0.50 | -0.83  | 4.02  | -1.96 |       |
| FLU0277   | 55624  | NM_017739    | 14950 | -0.08 | -0.93 | -0.43 | 0.61  | 0.66  | 1.31  | -0.51 | -0.76 | -0.70 | -1.43  | 2.57  | -1.96 |       |
| MAGEC1    | 9947   | NM_005462    | 14951 | -0.07 | -0.66 | -0.81 | 1.28  | 1.28  | 0.51  | -0.33 | -0.84 | -0.79 | -1.53  | 3.07  | -1.96 |       |
| SALTIC3   | 442038 | NM_00200943  | 14952 | -0.12 | 0.05  | -0.19 | 0.47  | 0.47  | 0.47  | -0.66 | -1.30 | -0.67 | -2.26  | 1.98  | -1.96 |       |
| BB        | 3576   | NM_000084    | 14953 | -0.68 | -0.91 | -1.16 | -0.29 | 0.60  | -0.18 | -0.40 | -0.77 | -0.79 | -2.75  | 0.13  | -1.96 |       |
| IRP       | 8394   | NM_032027    | 14954 | -0.05 | -0.18 | 0.40  | 1.45  | 0.60  | 1.52  | -0.74 | -0.69 | -0.51 | -0.17  | 3.57  | -1.96 |       |
| K12584    | 8021   | NM_021519    | 14955 | -0.66 | -0.23 | -0.16 | 0.57  | -0.12 | -0.17 | -0.12 | -0.17 | -0.17 | -3.09  | 0.18  | -1.96 |       |
| LOC189293 | 389293 | NM_001800540 | 14956 | -0.66 | -0.52 | -0.88 | 0.30  | 0.14  | 0.13  | -0.73 | -0.40 | -0.84 | -2.06  | 2.09  | -1.96 |       |
| KIAA283   | 283838 | NM_015005    | 14957 | -0.48 | -0.26 | 0.55  | 0.74  | 1.85  | 0.91  | -0.66 | -1.05 | -0.26 | -0.18  | 3.50  | -1.96 |       |
| ENTH      | 9685   | NM_016666    | 14958 | -1.05 | -1.01 | -0.67 | -0.10 | -0.10 | -0.10 | -1.15 | -0.10 | -0.49 | -2.75  | 1.52  | -1.96 |       |
| SOX1      | 6756   | NM_005635    | 14959 | -0.34 | 0.40  | 0.24  | 1.59  | 0.92  | 1.49  | -0.70 | -0.60 | -0.66 | -0.60  | 4.01  | -1.96 |       |
| C10ORF80  | 159686 | NM_001008723 | 14960 | -0.68 | -0.52 | -1.08 | -0.09 | -0.88 | -0.88 | -0.82 | -0.50 | -0.64 | -2.28  | -1.95 | -1.96 |       |
| CUGBP2    | 10659  | NM_006561    | 14961 | -0.45 | -0.76 | -0.38 | 0.77  | 0.56  | 0.53  | -0.21 | -0.99 | -0.76 | -0.69  | 1.86  | -1.96 |       |
| GHEK2     | 2604   | NM_0010384   | 14962 | -0.09 | -0.68 | -0.86 | 0.64  | 0.39  | 0.64  | -0.57 | -0.61 | -0.61 | -0.61  | 0.88  | -1.96 |       |
| ZNF19     | 7567   | NM_006961    | 14963 | -0.90 | -0.17 | -0.86 | 0.24  | 0.39  | 0.96  | -0.88 | -1.10 | -0.99 | -1.92  | 1.60  | -1.96 |       |
| GCA       | 25801  | NM_021198    | 14964 | -0.43 | -0.68 | -0.14 | 0.62  | -0.58 | 0.33  | -0.78 | -0.91 | -0.28 | -0.97  | 0.37  | -1.97 |       |
| IRF1      | 8119   | NM_00101788  | 14965 | -0.41 | -0.53 | -0.60 | 0.10  | 0.59  | 0.10  | -0.65 | -0.40 | -0.40 | -0.84  | 0.90  | -1.97 |       |
| MGC4767   | 84274  | NM_023214    | 14966 | -0.69 | -0.51 | -0.63 | 0.79  | 0.61  | 1.36  | -0.58 | -0.53 | -0.85 | -1.83  | 2.76  | -1.97 |       |
| IP08      | 10526  | NM_006390    | 14967 | -0.76 | -1.14 | -1.06 | -0.56 | 0.20  | 0.53  | -0.45 | -0.87 | -0.65 | -2.95  | 0.17  | -1.97 |       |
| 3070      | 3070   | NM_0210202   | 14968 | 0.06  | 8.47  | -0.11 | 15.25 | 11.31 | 11.31 | -0.42 | -0.42 | -0.42 | -18.94 | 40.69 | -1.97 |       |
| GLMN      | 11346  | NM_007070    | 14969 | 0.97  | -0.49 | -0.11 | 1.46  | 0.72  | 3.64  | 1.66  | -0.50 | -0.78 | -0.60  | -1.27 | 6.02  | -1.97 |
| MDH1      | 4190   | NM_005917    | 14970 | -1.09 | -0.94 | -0.93 | -1.04 | -1.00 | -1.25 | -0.73 | -0.65 | -0.58 | -2.96  | -3.29 | -1.97 |       |
| GCM2      | 9247   | NM_004752    | 14971 | -0.59 | 0.00  | -0.86 | 1.58  | 1.29  | 0.69  | -0.91 | -0.04 | -1.02 | -1.46  | 3.56  | -1.97 |       |
| TCO2      | 2582   | NM_019113    | 14972 | -0.23 | 0.09  | -0.48 | 1.07  | 0.47  | 0.18  | -0.47 | -0.12 | -0.12 | -0.16  | 3.47  | -1.97 |       |
| TAF5      | 6877   | NM_006951    | 14973 | -1.21 | -0.93 | -1.46 | -1.28 | -1.08 | -1.28 | -0.72 | -0.51 | -0.74 | -3.60  | -3.64 | -1.97 |       |
| SEC12A2   | 55176  | NM_018144    | 14974 | -0.46 | -0.43 | -0.43 | 0.30  | 0.58  | 0.59  | -0.50 | -0.79 | -0.68 | -1.33  | 1.47  | -1.97 |       |
| FRS136    | 61320  | NM_001038017 | 14975 | -1.04 | -1.03 | -1.04 | -1.17 | -1.17 | -1.17 | -0.52 | -0.52 | -0.52 | -2.23  | 1.69  | -1.97 |       |
| FLU0433   | 54932  | NM_017820    | 14976 | -0.89 | -0.45 | -0.16 |       |       |       |       |       |       |        |       |       |       |

|             |        |              |       |       |       |       |       |       |       |       |       |       |       |       |       |
|-------------|--------|--------------|-------|-------|-------|-------|-------|-------|-------|-------|-------|-------|-------|-------|-------|
| 08A15       | 81328  | NM_001005275 | 15059 | -0.67 | -0.91 | -0.93 | 0.98  | 0.27  | 1.22  | -0.40 | -0.76 | -0.88 | -2.51 | 2.46  | -2.00 |
| CDOR44      | 55395  | NM_001005113 | 15060 | 0.15  | -0.27 | -0.24 | 0.16  | 0.44  | -0.16 | -0.72 | -0.33 | -0.42 | -0.36 | 1.55  | -1.01 |
| SKP         | 51763  | NM_016532    | 15061 | 0.32  | -0.53 | -0.53 | 1.26  | 1.45  | 2.12  | -0.43 | -0.60 | -0.98 | 0.74  | 4.82  | -2.01 |
| PODL        | 5420   | NM_005397    | 15062 | 0.40  | -0.54 | -0.14 | 0.86  | -0.40 | 0.95  | -0.63 | -0.67 | -0.71 | -0.64 | 1.41  | -2.01 |
| MGC20983    | 115948 | NM_145045    | 15063 | -0.26 | -0.07 | -0.63 | 2.17  | 0.41  | 0.93  | -0.80 | -0.50 | -0.71 | -0.96 | 3.50  | -2.01 |
| MPCS4       | 404    | NM_0064      | 15064 | 0.36  | 0.44  | 0.41  | 0.68  | 0.49  | 0.69  | 0.38  | 0.48  | 0.79  | 0.27  | 2.64  | -2.01 |
| AKR1C3      | 8644   | NM_003739    | 15065 | -0.99 | -0.73 | -0.63 | -0.43 | -0.54 | -0.43 | -0.69 | -0.87 | -0.45 | -2.36 | -1.40 | -2.01 |
| AR2B        | 25841  | NM_145804    | 15066 | 0.24  | 0.56  | -0.42 | 2.62  | 2.38  | 2.18  | -0.75 | -0.41 | -0.84 | -0.38 | 7.19  | -2.01 |
| CD-UBP      | 9218   | NM_015607    | 15067 | 0.43  | 0.05  | 0.17  | 1.02  | 1.59  | 1.77  | -0.57 | -0.56 | 0.77  | -0.66 | 0.65  | -1.41 |
| GDOR48      | 50854  | NM_001040438 | 15068 | 0.37  | -0.33 | 0.01  | 2.02  | 1.01  | 1.46  | -0.50 | -0.76 | -0.76 | 0.05  | 4.48  | -2.01 |
| SLCD45      | 347051 | NM_00110893  | 15069 | 0.70  | 0.35  | -0.45 | 1.91  | 1.76  | 2.10  | -0.57 | -0.60 | -0.83 | -0.60 | 5.77  | -2.01 |
| 1610        | 1610   | NM_007079    | 15070 | -0.69 | -0.28 | 0.01  | 0.74  | 0.27  | 0.74  | -0.67 | -0.67 | -0.67 | -0.97 | 2.17  | -2.01 |
| SOGRS3      | 22986  | NM_014978    | 15071 | 0.81  | -0.33 | -0.69 | 0.87  | 0.50  | 0.60  | -0.96 | -0.16 | -0.80 | -1.83 | 1.97  | -2.01 |
| TCF7        | 6932   | NM_201633    | 15072 | -1.24 | -1.10 | -0.49 | 0.18  | -0.95 | -0.51 | -1.16 | -0.59 | -0.26 | -2.83 | -1.28 | -2.01 |
| DKPZ964F052 | 25946  | NM_015475    | 15073 | -0.39 | -0.72 | -0.70 | 0.89  | 0.82  | 1.52  | -0.49 | -0.71 | -0.81 | -1.82 | 3.23  | -2.01 |
| NTC18       | 9304   | NM_003253    | 15074 | -0.10 | -0.69 | -0.38 | 0.79  | 0.31  | 0.99  | -0.63 | -0.75 | -0.61 | -1.17 | 2.10  | -2.01 |
| FLU         | 2735   | NM_005269    | 15075 | -0.38 | -0.47 | -0.34 | 1.32  | 1.26  | 0.82  | -0.83 | -0.86 | -0.32 | -1.19 | 3.39  | -2.01 |
| GTU         | 26998  | NM_014975    | 15076 | 0.32  | -0.41 | -1.15 | 0.30  | -0.05 | 0.14  | -0.37 | -0.61 | -1.03 | -2.14 | 0.39  | -2.01 |
| LC238962    | 38962  | NM_001035505 | 15077 | -1.22 | -0.55 | -1.12 | 0.51  | -0.12 | 0.00  | -0.50 | -0.35 | -0.76 | -2.93 | 0.39  | -2.01 |
| PRDX1       | 5052   | NM_181697    | 15078 | -0.69 | -0.50 | -0.86 | 0.09  | 0.18  | 0.00  | -0.62 | -0.50 | -0.90 | -2.06 | 0.27  | -2.01 |
| ADHF1       | 137872 | NM_144650    | 15079 | -0.60 | -0.96 | -0.96 | 0.12  | 0.38  | -0.34 | -0.47 | -0.89 | -0.65 | -2.53 | 0.16  | -2.01 |
| PH42        | 5161   | NM_005390    | 15080 | 1.18  | 0.26  | -0.67 | 2.98  | 4.22  | 2.60  | -0.18 | -0.66 | -0.88 | 0.77  | 9.80  | -2.01 |
| SERP1NF1    | 5176   | NM_002615    | 15081 | -0.07 | 0.33  | -0.02 | 2.71  | 3.26  | 2.90  | -0.83 | -0.42 | -0.76 | 0.25  | 8.87  | -2.01 |
| PRTFDC1     | 56952  | NM_002020    | 15082 | -0.18 | -0.46 | -0.83 | -0.09 | 0.85  | 1.34  | -0.22 | -0.64 | -1.16 | -1.46 | 2.10  | -2.01 |
| MGC13309    | 137362 | NM_152413    | 15083 | -0.17 | 0.13  | 0.13  | 1.95  | 1.13  | 1.97  | -0.86 | -0.48 | -0.67 | 0.09  | 5.04  | -2.01 |
| GALNT7      | 51809  | NM_017422    | 15084 | -0.60 | -0.96 | -0.60 | 0.54  | 0.61  | 0.31  | -0.78 | -1.15 | -0.98 | -2.55 | 1.33  | -2.02 |
| KIA1539     | 80256  | NM_025182    | 15085 | 0.08  | -0.72 | -1.21 | 0.02  | 0.10  | -0.03 | 0.18  | -1.04 | -1.16 | -1.85 | 0.09  | -2.02 |
| H157H122A   | 255626 | NM_170610    | 15086 | -0.99 | -0.73 | -0.49 | -0.15 | -0.20 | -0.43 | -0.73 | -0.71 | -0.58 | -2.21 | -0.78 | -2.02 |
| H157H122B   | 25574  | NM_015506    | 15087 | -0.50 | -0.39 | -0.61 | 1.15  | 1.25  | 1.17  | -0.64 | -0.52 | -0.51 | -0.52 | 1.97  | -2.02 |
| DHDS        | 79947  | NM_205861    | 15088 | -0.52 | -0.61 | -0.11 | 0.48  | 1.15  | 0.23  | -0.72 | -0.92 | -0.38 | -1.25 | 1.85  | -2.02 |
| GRP39       | 2863   | NM_001508    | 15089 | -0.15 | -0.87 | -0.59 | 1.00  | 0.83  | 0.83  | -0.53 | -0.83 | -0.65 | -1.61 | 2.67  | -2.02 |
| MF44        | 317    | NM_0030804   | 15090 | -0.88 | -0.14 | -0.64 | -0.54 | -0.84 | -0.64 | -1.00 | -0.34 | -0.66 | -1.96 | 1.32  | -2.02 |
| RASL118     | 65997  | NM_023940    | 15091 | 0.04  | 0.17  | -0.36 | 1.02  | 1.26  | 1.23  | -0.48 | -0.72 | -0.82 | -1.53 | 3.50  | -2.02 |
| RET         | 56729  | NM_020415    | 15092 | -1.30 | -0.52 | -1.04 | -0.54 | -0.80 | -0.16 | -0.90 | -0.21 | -0.92 | -2.86 | -1.49 | -2.02 |
| LC441294    | 441294 | NM_001008747 | 15093 | -0.70 | -0.07 | -0.85 | 0.43  | 0.04  | 0.22  | -0.81 | -0.46 | -0.75 | -1.62 | 0.69  | -2.02 |
| FL4M64      | 64536  | NM_0171556   | 15094 | 0.32  | 0.44  | -0.52 | 0.58  | 0.48  | 0.48  | -0.58 | -0.78 | -0.67 | -0.97 | 1.75  | -2.02 |
| PR512       | 8492   | NM_003619    | 15095 | -0.66 | -1.26 | -1.23 | -0.11 | 0.08  | 0.61  | -0.09 | -0.81 | -1.12 | -3.16 | 0.57  | -2.02 |
| CL40H129    | 51527  | NM_016472    | 15096 | -1.16 | -0.42 | 0.62  | 1.46  | 0.43  | 0.88  | -1.05 | -0.68 | -0.30 | -0.97 | 2.78  | -2.02 |
| 1116        | 1116   | NM_002084    | 15097 | -0.57 | -0.35 | -1.11 | 0.45  | -0.50 | -0.44 | -0.55 | -0.45 | -1.14 | -0.52 | 5.82  | -2.02 |
| ADAM19      | 8728   | NM_023038    | 15098 | -1.08 | -1.13 | -0.42 | 0.27  | 0.72  | 0.56  | -1.00 | -0.99 | -0.04 | -2.63 | 1.56  | -2.02 |
| ASPSR1      | 79098  | NM_024083    | 15099 | -0.13 | 0.23  | -0.46 | 0.43  | 1.64  | 1.94  | -0.38 | -0.57 | -1.07 | -0.37 | 4.01  | -2.02 |
| RF6-66C19.2 | 72899  | NM_00103045  | 15100 | -1.05 | -0.61 | -0.40 | -0.79 | 0.40  | -0.83 | -0.34 | -0.79 | -0.41 | -2.64 | -1.19 | -2.02 |
| BE1         | 582    | NM_024649    | 15101 | 0.54  | 0.68  | -0.93 | 1.05  | 1.29  | 0.66  | -0.46 | -0.71 | -0.85 | -2.15 | 3.00  | -2.02 |
| USPX        | 8239   | NM_021906    | 15102 | -0.45 | -0.05 | -0.54 | 0.64  | 1.56  | 1.24  | -0.57 | -0.63 | -0.82 | -1.04 | 3.45  | -2.02 |
| IFL3        | 128859 | NM_174897    | 15103 | -0.39 | -0.77 | -0.70 | 0.19  | -0.12 | -0.44 | -0.54 | -0.81 | -0.67 | -1.85 | -0.36 | -2.02 |
| R303        | 8304   | NM_003016    | 15104 | 0.49  | 0.59  | 0.25  | 0.68  | 0.83  | 0.68  | -0.83 | -0.58 | -0.68 | -1.31 | 1.50  | -2.02 |
| SPRR2E      | 6704   | NM_001024209 | 15105 | -0.60 | -1.22 | -1.10 | 1.04  | 0.11  | 1.08  | -0.54 | -0.82 | -0.67 | -3.03 | 2.23  | -2.02 |
| CRYG        | 1419   | NM_005210    | 15106 | 0.41  | -0.87 | -0.91 | 1.07  | 1.88  | 0.56  | -0.88 | -1.09 | -0.86 | -1.37 | 3.51  | -2.02 |
| 1159        | 1159   | NM_016231    | 15107 | -0.51 | -0.81 | -0.60 | 0.51  | 0.80  | 0.51  | -0.82 | -0.51 | -1.00 | -2.32 | 0.16  | -2.02 |
| TEP1        | 7011   | NM_007110    | 15108 | -0.67 | -0.42 | -0.60 | 0.85  | 2.09  | 1.11  | -0.55 | -0.82 | -0.66 | -1.69 | 0.44  | -2.03 |
| UBN1        | 29855  | NM_016936    | 15109 | -0.54 | -0.89 | -0.67 | -0.01 | -0.26 | 0.67  | -0.50 | -0.77 | -0.75 | -2.11 | 0.41  | -2.03 |
| 7FN142      | 22897  | NM_00103029  | 15110 | -0.59 | -0.32 | -1.07 | -0.18 | 0.22  | 1.02  | -0.62 | -0.62 | -0.62 | -1.98 | 1.44  | -2.03 |
| SEMASA      | 9037   | NM_003966    | 15111 | 0.14  | 0.95  | -0.98 | 0.93  | 0.07  | 1.15  | -0.14 | -0.90 | -0.98 | -1.75 | 2.15  | -2.03 |
| OK410       | 390197 | NM_00104705  | 15112 | -0.56 | -0.55 | -0.30 | 0.10  | -0.14 | 0.48  | -0.71 | -0.63 | -0.69 | -1.41 | 0.44  | -2.03 |
| FLJ2915     | 129154 | NM_145014    | 15113 | 0.27  | -0.28 | -0.34 | 1.06  | 0.94  | 1.61  | -0.48 | -0.71 | -0.85 | -0.35 | 3.61  | -2.03 |
| REN3        | 5470   | NM_018427    | 15114 | -0.13 | -0.98 | -1.21 | -0.62 | -0.97 | -0.62 | -1.02 | -0.63 | -0.44 | -3.21 | 2.44  | -2.03 |
| SLC29A3     | 55315  | NM_018444    | 15115 | -0.63 | -0.53 | -0.55 | 0.55  | 0.05  | 0.09  | -0.80 | -0.70 | -0.53 | -1.67 | 0.69  | -2.03 |
| NO3         | 197358 | NM_178844    | 15116 | -0.17 | -0.27 | -0.13 | 1.57  | 1.01  | 0.98  | -0.78 | -0.68 | -0.57 | -0.57 | 3.53  | -2.03 |
| LC132203    | 132203 | NM_001005037 | 15117 | -0.87 | -0.55 | -0.85 | -0.15 | -0.09 | -0.57 | -0.83 | -0.67 | -0.55 | -1.27 | 1.11  | -2.03 |
| CMYA3       | 129446 | NM_001079810 | 15118 | -0.84 | -0.44 | -0.74 | 0.33  | 0.10  | 0.10  | -0.69 | -0.53 | -0.81 | -2.02 | 0.53  | -2.03 |
| BTX         | 25998  | NM_015525    | 15119 | -0.13 | 0.60  | -1.18 | 0.54  | 1.70  | 0.77  | -0.63 | -0.57 | -0.83 | -0.72 | 1.47  | -2.03 |
| LMH7        | 469    | NM_002358    | 15120 | 2.63  | 3.00  | 1.21  | 6.91  | 7.07  | 8.16  | -0.60 | -0.60 | -0.60 | 6.85  | 22.14 | -2.03 |
| AD5         | 159    | NM_001126    | 15121 | 0.24  | 1.17  | -0.46 | 2.57  | 2.35  | 1.46  | -0.63 | -0.59 | -0.81 | 0.95  | 3.38  | -2.03 |
| LC138255    | 138255 | NM_001010940 | 15122 | -0.78 | -0.18 | -0.23 | 0.73  | 1.92  | 1.29  | -1.07 | -1.41 | -0.56 | -1.20 | 3.94  | -2.03 |
| G8A         | 2629   | NM_000157    | 15123 | -0.19 | 0.32  | -0.67 | 1.25  | 1.03  | 0.75  | -0.86 | -0.50 | -0.68 | -0.55 | 3.03  | -2.03 |
| 8142        | 8142   | NM_198074    | 15124 | 1.47  | 1.60  | 1.21  | 2.42  | 2.47  | 2.83  | 0.65  | -0.95 | -0.80 | 0.55  | 5.39  | -2.03 |
| PCB02       | 84105  | NM_023151    | 15125 | -0.05 | -0.33 | -0.18 | 2.26  | 1.68  | 2.20  | -0.68 | -0.82 | -0.54 | -2.00 | 6.14  | -2.03 |
| DKPZ951011  | 200081 | NM_178582    | 15126 | -1.59 | -1.50 | -1.38 | -1.43 | -1.46 | -1.01 | -0.64 | -0.86 | -0.54 | -4.46 | -3.90 | -2.03 |
| IF7         | 667    | NM_001773    | 15127 | -0.06 | -0.40 | -0.40 | 0.57  | 0.60  | 0.40  | -0.57 | -0.68 | -0.40 | -0.47 | 3.61  | -2.03 |
| GMAP5       | 55340  | NM_018384    | 15128 | 0.78  | -0.77 | -0.64 | 0.03  | 0.65  | 0.82  | -0.25 | -0.77 | -1.02 | -0.66 | 1.51  | -2.04 |
| HTR1A       | 3350   | NM_000524    | 15129 | -0.83 | -0.92 | -1.03 | 0.28  | 0.46  | -0.18 | -0.56 | -0.65 | -0.83 | -2.78 | 0.56  | -2.04 |
| 7FN142      | 22897  | NM_00103029  | 15130 | -0.36 | -0.42 | -0.43 | -0.42 | -0.42 | -0.42 | -0.42 | -0.42 | -0.42 | -2.48 | -0.52 | -2.04 |
| HSPC42      | 29986  | NM_014173    | 15131 | 1.02  | 0.34  | -0.16 | 0.35  | 1.16  | 0.20  | -0.89 | -0.74 | -0.40 | 0.48  | 1.71  | -2.04 |
| OKH112      | 440153 | NM_001013354 | 15132 | -0.38 | -0.07 | 0.02  | 2.24  | 1.08  | 1.51  | -0.94 | -0.40 | -0.69 | -0.43 | 4.83  | -2.04 |
| KRTAP3-2    | 88997  | NM_013959    | 15133 | 0.11  | 0.18  | -1.22 | 0.52  | 0.74  | 0.89  | -0.66 | -1.12 | -1.27 | -1.34 | 2.15  | -2.04 |
| MCC9271     | 119467 | NM_230211    | 15134 | 0.11  | 0.32  | -0.18 | 0.12  | 0.12  | 0.53  | -0.42 | -0.48 | -0.62 | -0.62 | 3.25  | -2.04 |
| CPYD6       | 1565   | NM_001025161 | 15135 | 0.85  | -1.00 | -1.23 | -0.08 | -0.41 | -0.60 | -0.51 | -0.60 | -0.94 | -3.08 | -1.10 | -2.04 |
| SDHA        | 6389   | NM_004168    | 15136 | -0.21 | -0.23 | -0.15 | 1.39  | 1.35  | 1.32  | -0.67 | -0.70 | -0.67 | -0.59 | 4.06  | -2.04 |
| DLL3        | 1068   | NM_020486    | 15137 | 0.50  | 0.29  | 0.76  | 0.21  | 1.13  | 0.86  | -0.62 | -0.62 | -0.62 | -0.55 | 2.43  | -2.04 |
| OP106       | 22906  | NM_014965    | 15138 | -0.37 | -0.64 | -0.03 | -0.38 |       |       |       |       |       |       |       |       |

|           |        |              |       |       |       |       |       |       |       |       |       |       |       |       |       |
|-----------|--------|--------------|-------|-------|-------|-------|-------|-------|-------|-------|-------|-------|-------|-------|-------|
| ZMH03     | 51304  | NM_016598    | 15221 | -0.14 | 0.28  | 0.04  | 2.89  | 1.76  | 1.87  | -0.82 | -0.51 | 0.75  | 0.18  | 6.53  | -2.08 |
| EPH01     | 57623  | NM_016409    | 15222 | -0.46 | -0.24 | -0.56 | 1.40  | 3.15  | 2.47  | -0.58 | -0.61 | -0.68 | -1.26 | 7.24  | -1.08 |
| QAZ2      | 4947   | NM_002537    | 15223 | 0.97  | 1.03  | -1.16 | 0.02  | -0.49 | -0.22 | -0.90 | -0.50 | -0.68 | -1.30 | -0.69 | -2.08 |
| TAAR1     | 134864 | NM_138327    | 15224 | 0.01  | 0.00  | 0.01  | 1.45  | 1.61  | 3.04  | -0.50 | -0.77 | -0.81 | 0.02  | 6.10  | -2.08 |
| ORL23     | 99192  | NM_00104087  | 15225 | -0.34 | -0.23 | -0.42 | 1.29  | 1.70  | 1.73  | -0.66 | -0.66 | -0.76 | -1.00 | 4.73  | -2.08 |
| GRPP11    | 5609   | NM_016236    | 15226 | 0.68  | 1.04  | 0.68  | -1.03 | 0.87  | 1.51  | -1.03 | 0.86  | 1.44  | 1.51  | 1.58  | -2.08 |
| LOC51233  | 51233  | NM_016449    | 15227 | -0.67 | -1.08 | -1.19 | -0.52 | -0.48 | -0.13 | -0.52 | -0.65 | -0.91 | -2.94 | -1.12 | -2.08 |
| TMSF7     | 53345  | NM_00101524  | 15228 | -0.88 | -0.81 | -0.73 | -0.48 | 0.88  | 0.69  | -0.43 | -0.97 | -0.69 | -2.42 | 1.09  | -2.08 |
| HMDS1     | 10865  | NM_016229    | 15229 | 0.27  | 0.55  | 0.85  | 0.60  | 1.00  | 1.14  | 1.02  | 1.15  | 1.12  | 1.22  | 1.13  | -2.08 |
| IQGAP3    | 128239 | NM_178229    | 15230 | -0.43 | -0.37 | -0.19 | 1.00  | 1.14  | 1.18  | -0.72 | -0.79 | -0.58 | -0.99 | 3.32  | -2.08 |
| CT1       | 3396   | NM_001545    | 15231 | -0.23 | -0.53 | -0.44 | 1.74  | 1.60  | 2.72  | -0.55 | -0.70 | -0.84 | -1.20 | 6.06  | -2.08 |
| ISAR      | 9085   | NM_0013861   | 15232 | -0.21 | -0.05 | -0.21 | 0.52  | 0.62  | 1.41  | -0.32 | -0.40 | -0.36 | -0.75 | 2.74  | -2.08 |
| KJAA0643  | 23959  | NM_015041    | 15233 | 0.04  | 0.88  | -0.60 | 0.72  | 0.05  | 0.60  | -0.58 | -0.94 | -0.57 | 1.44  | 1.26  | -2.08 |
| NCDN      | 23154  | NM_001014841 | 15234 | -0.46 | -0.59 | -0.63 | 0.28  | 0.32  | 1.35  | -0.64 | -0.65 | -0.79 | -1.68 | 1.96  | -2.08 |
| BTN2A1    | 11120  | NM_007049    | 15235 | -0.07 | -0.62 | -0.59 | 1.13  | 2.43  | 2.08  | -0.28 | -0.99 | -0.82 | -1.28 | 5.85  | -2.08 |
| PSCA      | 8654   | NM_038437    | 15236 | -0.72 | 0.45  | -0.85 | 0.60  | 0.40  | 0.43  | -0.86 | -0.36 | -0.86 | -2.02 | 1.48  | -2.08 |
| GATA1     | 2623   | NM_002049    | 15237 | -0.14 | -0.90 | -0.57 | 1.11  | 0.72  | 1.05  | 0.01  | -1.11 | -0.99 | -1.61 | 2.88  | -2.08 |
| PKRCL1    | 5585   | NM_213560    | 15238 | -0.52 | -0.84 | -0.83 | 0.34  | 0.36  | 0.15  | -0.61 | -0.76 | -0.71 | -2.39 | 0.84  | -2.09 |
| TTN       | 7273   | NM_132379    | 15239 | -0.67 | -0.96 | -0.84 | -0.37 | -0.23 | 0.22  | -0.60 | -0.75 | -0.73 | -2.46 | 0.37  | -2.09 |
| A1BG      | 1      | NM_130786    | 15240 | -0.30 | -0.66 | -0.94 | 1.49  | 2.11  | 2.43  | -0.37 | -0.90 | -0.82 | -1.90 | 6.02  | -2.09 |
| DNAIC5B   | 85479  | NM_033105    | 15241 | -0.22 | -0.72 | -0.57 | 0.75  | 0.43  | 0.97  | -0.46 | -0.95 | -0.68 | -1.51 | 2.16  | -2.09 |
| CSRP15    | 56951  | NM_0020189   | 15242 | -0.24 | 0.27  | 0.37  | 1.50  | 2.45  | 1.21  | -0.96 | -0.79 | -0.33 | 0.40  | 5.15  | -2.09 |
| CTN       | 2017   | NM_138565    | 15243 | -0.98 | -0.58 | 0.08  | 0.23  | 1.28  | 1.57  | -0.85 | -0.79 | -0.45 | -1.48 | 3.08  | -2.09 |
| CGI-48    | 51096  | NM_016001    | 15244 | -1.10 | -1.06 | -1.33 | 0.59  | -0.02 | 1.10  | -0.73 | -0.30 | -1.06 | -3.49 | 1.66  | -2.09 |
| ATRVF5G2  | 534    | NM_138282    | 15245 | -1.16 | -0.23 | -0.86 | 0.47  | 0.07  | -0.09 | -0.95 | -0.43 | -0.71 | -2.26 | 0.44  | -2.09 |
| MRFSP17   | 51373  | NM_0150969   | 15246 | -0.81 | -0.71 | -1.54 | -0.76 | -1.10 | 0.40  | 0.44  | -0.35 | -1.30 | -3.09 | -1.47 | -2.09 |
| EB2       | 163126 | NM_153232    | 15247 | -0.59 | -0.56 | -0.26 | 0.01  | 0.71  | 0.07  | -0.84 | -0.80 | -0.45 | -1.41 | 0.79  | -2.09 |
| BHMT2     | 23743  | NM_017614    | 15248 | -0.24 | -0.69 | 0.00  | 1.81  | 0.45  | 0.33  | -0.96 | -0.88 | -0.25 | -0.92 | 2.58  | -2.09 |
| SNP       | 5155   | NM_016230    | 15249 | -0.56 | -0.60 | -0.23 | 0.11  | 0.56  | 0.81  | -0.71 | -0.61 | -0.71 | -1.38 | 0.71  | -2.09 |
| MGC45780  | 286133 | NM_173833    | 15250 | -0.91 | -0.25 | -0.30 | 0.20  | 0.39  | 1.26  | -0.84 | -0.55 | -0.70 | -1.46 | 1.85  | -2.09 |
| RAF1      | 5894   | NM_002880    | 15251 | -1.08 | 1.16  | 0.10  | 3.49  | 2.89  | 2.68  | -0.72 | -0.64 | -0.73 | -2.34 | 9.06  | -2.09 |
| TRND1     | 22245  | NM_017550    | 15252 | 0.08  | -0.44 | -0.47 | 0.68  | -0.17 | 0.64  | -0.67 | -0.72 | -0.71 | -0.69 | 0.59  | -2.09 |
| CTD11     | 147040 | NM_001002914 | 15253 | 1.63  | 1.44  | -1.46 | -2.26 | -0.46 | 1.35  | -0.37 | -0.74 | -0.96 | -4.52 | -1.38 | -2.09 |
| HLA-DQA1  | 3117   | NM_002122    | 15254 | -0.09 | 0.04  | -0.43 | 1.36  | 1.48  | 0.87  | -0.55 | -0.69 | -0.86 | -0.29 | 3.70  | -2.09 |
| CFR26     | 79034  | NM_014067    | 15255 | -0.65 | -0.63 | -0.80 | 0.31  | 0.30  | 0.48  | -0.63 | -0.53 | -0.93 | -0.29 | 1.09  | -2.09 |
| WDR50     | 8469   | NM_002098    | 15256 | -0.62 | -0.63 | -0.32 | 0.62  | 0.02  | 0.70  | -0.64 | -0.62 | -0.58 | -0.69 | 3.10  | -2.09 |
| DF3       | 8110   | NM_012074    | 15257 | 2.28  | 5.31  | 4.15  | 8.96  | 6.68  | 8.77  | -0.74 | -0.63 | -0.72 | 11.73 | 24.41 | -2.09 |
| ABC8      | 23457  | NM_203445    | 15258 | -1.09 | -1.21 | -0.94 | -0.38 | -0.69 | -0.42 | -0.56 | -0.69 | -0.84 | -3.25 | -1.49 | -2.09 |
| SIRP4     | 17045  | NM_00100998  | 15259 | -0.39 | -0.21 | -1.66 | 0.57  | 0.39  | 0.21  | -0.57 | -0.62 | -0.65 | -1.26 | 0.95  | -2.09 |
| SEMA3B    | 7869   | NM_001005914 | 15260 | -0.82 | -0.54 | -1.03 | 0.29  | 0.70  | 0.32  | -0.60 | -0.79 | -0.71 | -2.39 | 1.31  | -2.09 |
| GAS       | 2520   | NM_000005    | 15261 | -0.15 | -0.45 | -0.65 | 1.06  | 1.19  | 0.78  | -0.49 | -1.03 | -0.57 | -1.26 | 3.03  | -2.09 |
| 1075      | 1075   | NM_000005    | 15262 | 0.06  | -0.21 | -0.64 | 0.76  | 1.48  | 0.64  | -0.76 | -0.84 | -0.78 | -0.78 | 3.51  | -2.09 |
| MGC20235  | 112277 | NM_145041    | 15263 | -0.58 | -0.69 | -0.57 | 0.60  | 0.55  | 0.43  | -0.68 | -0.80 | -0.62 | -1.83 | 1.58  | -2.10 |
| G1P3      | 2537   | NM_002038    | 15264 | -0.78 | -0.61 | -0.80 | -0.10 | 0.85  | 0.89  | -0.53 | -0.79 | -0.78 | -2.19 | 1.64  | -2.10 |
| LOC4744   | 64744  | NM_022733    | 15265 | -0.71 | -0.36 | -0.21 | 1.73  | 1.16  | 1.07  | -1.02 | -0.81 | -0.26 | -0.86 | 3.95  | -2.10 |
| CCNA4     | 800    | NM_002014    | 15266 | -0.74 | -0.39 | -0.45 | 0.62  | 0.57  | 0.50  | -0.65 | -0.77 | -0.56 | -1.68 | 1.00  | -2.10 |
| ADCY9     | 115    | NM_001116    | 15267 | -0.38 | -0.95 | -0.61 | 0.61  | 2.15  | 0.68  | -0.40 | -1.16 | -0.54 | -1.94 | 3.44  | -2.10 |
| SPR3      | 10888  | NM_016540    | 15268 | 0.03  | 0.40  | -0.48 | 2.07  | 1.29  | 2.33  | -0.76 | -0.46 | -0.87 | -0.05 | 5.69  | -2.10 |
| 1230K152  | 26148  | NM_016552    | 15269 | -0.51 | -0.85 | -0.85 | -0.26 | -0.16 | 0.42  | -0.36 | -0.42 | -0.42 | -1.63 | 3.14  | -2.10 |
| GDS       | 10993  | NM_006843    | 15270 | -0.77 | -0.72 | -0.85 | -0.25 | 0.03  | -0.20 | -0.64 | -0.68 | -0.77 | -2.34 | -0.42 | -2.10 |
| P11       | 8909   | NM_006025    | 15271 | -0.15 | 0.25  | 0.16  | 1.23  | 1.15  | 1.60  | -0.86 | -0.55 | -0.69 | -0.26 | 3.98  | -2.10 |
| LOC38818  | 38888  | NM_00134233  | 15272 | -1.74 | -1.65 | -1.77 | -0.87 | -1.20 | -0.86 | -0.86 | -0.86 | -0.66 | -4.66 | -2.97 | -2.10 |
| FLJ3759   | 286499 | NM_173698    | 15273 | -0.27 | -0.73 | -0.45 | 1.08  | 0.04  | 1.80  | -0.67 | -0.54 | -0.88 | -1.45 | 2.92  | -2.10 |
| TP73      | 7161   | NM_005427    | 15274 | -0.50 | -0.81 | -0.68 | 1.52  | 1.73  | 0.94  | -0.81 | -1.23 | -0.05 | -1.98 | 2.30  | -2.10 |
| RCH3      | 5743   | NM_002650    | 15275 | -0.54 | -1.24 | -0.70 | 0.13  | 0.86  | 0.45  | -0.68 | -1.19 | -0.23 | -0.48 | 1.64  | -2.10 |
| LOC12     | 3092   | NM_002536    | 15276 | -0.22 | -0.10 | -0.26 | 1.14  | 1.42  | 1.11  | -0.77 | -0.70 | -0.61 | -0.61 | 3.70  | -2.10 |
| LOC131212 | 613212 | NM_001127385 | 15277 | 0.03  | 0.30  | -0.37 | 1.20  | 1.59  | 1.33  | -0.34 | -0.74 | -1.02 | -0.03 | 4.11  | -2.10 |
| MDC1      | 9656   | NM_014641    | 15278 | -1.46 | -0.82 | -0.90 | 0.06  | -0.68 | -0.98 | -1.10 | -0.54 | -0.46 | -1.38 | -1.60 | -2.10 |
| HRH5      | 989    | NM_001840    | 15279 | -0.79 | -0.02 | -0.71 | 0.13  | 0.40  | 0.22  | -0.75 | -0.40 | -0.22 | -1.48 | 1.37  | -2.10 |
| CORF21    | 80231  | NM_025159    | 15280 | -0.58 | 0.61  | 0.18  | 1.16  | 1.16  | 0.59  | -0.88 | -0.94 | -0.28 | -1.10 | 2.90  | -2.10 |
| ARHGAP19  | 84886  | NM_032900    | 15281 | -0.79 | -0.85 | -0.94 | -0.22 | -0.55 | -0.40 | -0.78 | -0.59 | -0.73 | -2.58 | -1.18 | -2.10 |
| TMSF20    | 79857  | NM_001795    | 15282 | -0.72 | -0.67 | -0.65 | 0.28  | 0.08  | 0.45  | -0.95 | -0.77 | -0.38 | -0.64 | 0.74  | -2.10 |
| CYP7A1    | 1581   | NM_000780    | 15283 | -0.38 | -0.85 | -0.77 | 0.96  | 0.05  | 0.06  | -0.65 | -0.82 | -0.63 | -2.01 | 1.07  | -2.10 |
| SRP22     | 6731   | NM_006847    | 15284 | -0.62 | -0.28 | -0.17 | 0.02  | 0.93  | 1.67  | -0.65 | -0.62 | -0.83 | -1.07 | 2.61  | -2.10 |
| ARHGAP20  | 57569  | NM_026809    | 15285 | -0.55 | -0.67 | -1.37 | -0.83 | -0.42 | -0.65 | -0.44 | -0.65 | -1.01 | -2.60 | -1.90 | -2.10 |
| PRR20A    | 532    | NM_181897    | 15286 | 0.64  | 0.71  | -0.77 | 1.77  | 1.77  | 1.67  | -0.36 | -0.36 | -0.36 | -1.98 | 2.76  | -2.10 |
| HSP12     | 10247  | NM_005836    | 15287 | -0.31 | -0.55 | -0.82 | 1.14  | 0.69  | 0.98  | -0.34 | -0.76 | -1.00 | -1.68 | 2.81  | -2.10 |
| UBAP1     | 51271  | NM_016255    | 15288 | 0.60  | -0.29 | 0.18  | 1.68  | 1.58  | 1.03  | -0.40 | -0.92 | -0.79 | 0.49  | 4.29  | -2.10 |
| 1230K0559 | 55238  | NM_001013109 | 15289 | -0.85 | -0.78 | -0.64 | 0.64  | 0.76  | 0.45  | -0.76 | -0.84 | -0.76 | -1.75 | 1.67  | -2.10 |
| FECH      | 2235   | NM_001040    | 15290 | -1.21 | -0.75 | -1.01 | -0.65 | -0.11 | -0.45 | -0.91 | -0.58 | -0.61 | -2.97 | -1.20 | -2.10 |
| ADK       | 132    | NM_006721    | 15291 | -1.06 | -0.67 | -0.65 | 0.97  | 0.40  | -0.11 | -1.05 | -0.64 | -0.41 | -2.38 | 1.27  | -2.10 |
| C1orf204  | 28467  | NM_00134233  | 15292 | -0.53 | -1.12 | -0.78 | 0.12  | -0.63 | -1.84 | -1.12 | -0.62 | -0.78 | -2.44 | 1.42  | -2.10 |
| ND1       | 85407  | NM_033119    | 15293 | 0.90  | -0.95 | -0.65 | -0.59 | -0.79 | -0.33 | -0.78 | -0.75 | -0.57 | -2.50 | -1.71 | -2.10 |
| 3152      | 3152   | NM_000864    | 15294 | -0.85 | -0.39 | -0.96 | 0.54  | 0.23  | 0.56  | -0.72 | -0.56 | -0.82 | -2.20 | 1.33  | -2.10 |
| C1orf58   | 54858  | NM_058180    | 15295 | -0.59 | -0.94 | -0.71 | 0.44  | -0.10 | 0.27  | -0.70 | -0.87 | -0.51 | -2.25 | 0.60  | -2.10 |
| ZBTB11    | 27107  | NM_044415    | 15296 | -0.07 | 0.51  | -0.51 | 0.14  | 0.20  | 0.15  | -0.74 | -0.50 | -1.10 | -2.54 | 1.60  | -2.10 |
| CEN1      | 900    | NM_199246    | 15297 | -0.61 | -0.36 | -0.90 | 0.65  | 1.02  | 0.67  | -0.77 | -0.31 | -1.02 | -1.88 | 2.34  | -2.10 |
| NS        | 26354  | NM_206826    | 15298 | -1.25 | -1.20 | -1.48 | -0.80 | -0.93 | -0.64 | -0.80 | -0.54 | -0.76 | -3.72 | -2.37 | -2.10 |
| 152       | 152    | NM_006883    | 15299 | -0.28 | -0.29 | -0.42 | 1.52  | 1.43  | 1.43  | -0.80 | -0.68 | -0.62 | -1.20 | 4.06  | -2.10 |
| SPS81     | 80176  | NM_025106    | 15300 | -0.78 | -0.21 | 0.16  | 2.02  | 3.13  | 2.01  | -0.70 | -0.86 | -0.54 | -0.83 | 7.16  |       |

|           |        |              |       |       |       |       |       |       |       |       |       |       |       |       |       |       |
|-----------|--------|--------------|-------|-------|-------|-------|-------|-------|-------|-------|-------|-------|-------|-------|-------|-------|
| ZFAND6    | 54469  | NM_019006    | 15383 | -0.69 | -0.56 | -0.35 | 1.07  | 0.07  | 0.61  | -0.89 | -0.56 | -0.68 | -1.60 | 1.25  | -2.13 |       |
| LOC51307  | 51897  | NM_020482    | 15384 | -0.56 | -0.23 | -0.60 | 0.92  | 0.05  | 0.60  | -0.92 | -0.48 | -0.60 | -1.61 | 1.23  | -2.13 |       |
| MGC29888  | 133015 | NM_001130727 | 15385 | 0.34  | 1.76  | -0.13 | 1.87  | 1.88  | 2.04  | -0.70 | -0.65 | -0.78 | 0.97  | 5.78  | -2.13 |       |
| CHCND1    | 118487 | NM_203298    | 15386 | 0.08  | -0.68 | -0.59 | 1.49  | 1.94  | 2.05  | -0.21 | -0.86 | -1.07 | -1.19 | 5.48  | -2.13 |       |
| AE1       | 156    | NM_198970    | 15387 | -0.74 | -0.31 | -0.89 | 0.49  | 0.35  | -0.53 | -0.88 | -0.55 | -0.70 | -1.94 | 0.33  | -2.13 |       |
| TEB12     | 56139  | NM_038275    | 15388 | 0.03  | 0.11  | -0.13 | 0.92  | 2.08  | 2.89  | -0.77 | -0.66 | -0.71 | 0.21  | 6.70  | -2.14 |       |
| MNS1      | 55329  | NM_018365    | 15389 | -0.28 | -0.32 | 0.30  | 0.82  | 1.53  | 1.78  | -0.73 | -0.76 | -0.64 | -0.31 | 4.12  | -2.14 |       |
| CDORF100  | 84969  | NM_001098798 | 15390 | -0.67 | -0.68 | -0.18 | 1.06  | 1.05  | 1.03  | -0.77 | -0.85 | -0.52 | -1.53 | 3.14  | -2.14 |       |
| CAZP1     | 133991 | NM_030915    | 15391 | 0.12  | 0.12  | -0.03 | 0.61  | 0.17  | 2.08  | -0.61 | -0.77 | -0.61 | -0.61 | 0.58  | 2.04  | -2.14 |
| LOC129642 | 129642 | NM_138799    | 15392 | -0.97 | -0.54 | -0.51 | 0.00  | 1.12  | 0.25  | -0.72 | -0.87 | -0.55 | -2.01 | 1.37  | -2.14 |       |
| MARR2     | 2011   | NM_004954    | 15393 | -0.56 | -0.78 | -0.85 | -0.28 | -0.23 | -0.20 | -0.68 | -0.64 | -0.81 | -2.20 | 0.71  | -2.14 |       |
| GNL1      | 239    | NM_0209275   | 15394 | -0.39 | -0.36 | -0.25 | 0.88  | 0.66  | -0.02 | -0.66 | -0.57 | -0.88 | -1.78 | 0.60  | -2.14 |       |
| LOC51334  | 51334  | NM_016644    | 15395 | 0.03  | -1.12 | -0.01 | 1.19  | 0.90  | 1.99  | 0.50  | -0.92 | -0.71 | -1.17 | 4.08  | -2.14 |       |
| LOC146542 | 146542 | NM_001024683 | 15396 | -0.61 | -0.73 | -0.12 | 0.89  | 1.20  | 0.46  | -0.75 | -0.99 | -0.40 | -1.46 | 2.55  | -2.14 |       |
| CDORF98   | 80023  | NM_024958    | 15397 | -0.13 | 0.92  | -0.39 | 1.68  | 2.25  | 3.28  | -0.58 | -0.56 | -0.99 | 0.66  | 7.21  | -2.14 |       |
| CMP       | 8078   | NM_030929    | 15398 | -0.97 | -0.83 | -1.23 | 0.16  | -0.41 | 2.39  | -0.71 | -0.66 | -0.77 | -3.03 | 0.64  | -2.14 |       |
| RASD2     | 23551  | NM_014310    | 15399 | -1.00 | -1.03 | -0.81 | -0.18 | 0.14  | -0.14 | -0.97 | -1.01 | -0.17 | -2.84 | -0.82 | -2.14 |       |
| SM2       | 6493   | NM_009586    | 15400 | -0.48 | -0.28 | -0.01 | 1.09  | 1.33  | 1.46  | -0.73 | -0.85 | -0.56 | -0.78 | 3.88  | -2.14 |       |
| LOC2045   | 5486   | NM_018944    | 15401 | 0.22  | -0.89 | -0.88 | 1.70  | 0.30  | 1.28  | -0.78 | -0.78 | -0.58 | -1.66 | 3.28  | -2.14 |       |
| PHX28     | 55300  | NM_018323    | 15402 | -0.13 | -0.05 | -0.39 | 1.93  | 1.56  | 2.05  | -0.78 | -0.57 | -0.79 | -0.58 | 5.55  | -2.14 |       |
| LOC127665 | 127665 | NM_00109992  | 15403 | 0.00  | -0.09 | -0.22 | 1.01  | 0.62  | 1.60  | -0.70 | -0.67 | -0.77 | -0.32 | 3.22  | -2.14 |       |
| LG45      | 8549   | NM_003667    | 15404 | 0.22  | -0.39 | -0.39 | 0.81  | 1.29  | 1.68  | -0.62 | -0.79 | -0.73 | -0.56 | 3.78  | -2.14 |       |
| LOC285016 | 285016 | NM_001002919 | 15405 | 0.01  | -1.25 | -0.25 | 0.45  | 0.38  | 0.51  | -0.52 | -1.09 | -0.53 | -1.51 | 1.34  | -2.14 |       |
| PFM1G     | 5496   | NM_002707    | 15406 | -0.38 | -0.81 | -0.51 | 0.80  | 1.26  | 1.41  | -0.25 | -1.01 | -0.88 | -1.70 | 3.48  | -2.14 |       |
| PCL2      | 132954 | NM_152401    | 15407 | -1.04 | -1.00 | -0.94 | -0.22 | -0.39 | -0.17 | -0.79 | -0.80 | -0.55 | -2.98 | -0.78 | -2.14 |       |
| HOCX      | 3222   | NM_006897    | 15408 | -1.09 | -0.70 | -0.23 | 1.81  | 1.11  | 0.77  | -1.01 | -0.79 | -0.84 | -2.03 | 3.69  | -2.14 |       |
| TNFS9     | 8744   | NM_003811    | 15409 | -0.17 | 0.02  | 0.69  | 1.73  | 1.33  | 0.99  | -0.89 | -0.87 | -0.38 | 0.55  | 4.05  | -2.14 |       |
| CROR26    | 90865  | NM_033439    | 15410 | -0.78 | -0.65 | -0.83 | 0.46  | 0.56  | 1.46  | -0.72 | -0.60 | -0.81 | -2.26 | 2.48  | -2.14 |       |
| MNS19L    | 6410   | NM_023862    | 15411 | -0.21 | -0.59 | -0.62 | 0.64  | 0.52  | 1.27  | -0.54 | -0.62 | -0.54 | -1.15 | 2.13  | -2.14 |       |
| ZFH4      | 79776  | NM_024721    | 15412 | 0.05  | 0.65  | 0.84  | 2.33  | 2.08  | 2.52  | -0.93 | -0.61 | -0.60 | -1.53 | 6.93  | -2.14 |       |
| SPTAN1    | 6709   | NM_003127    | 15413 | -0.91 | -0.97 | -0.40 | -0.40 | -0.05 | -0.45 | -0.69 | -1.15 | -0.30 | -2.28 | 0.90  | -2.14 |       |
| GNL1      | 841    | NM_0209275   | 15414 | -0.68 | -0.76 | -0.58 | -0.22 | -0.58 | -0.22 | -0.68 | -0.68 | -0.57 | -2.03 | 1.53  | -2.14 |       |
| LOC40506  | 40506  | NM_001012991 | 15415 | -0.57 | -1.30 | -0.73 | 0.04  | -0.09 | -0.42 | -0.34 | -1.24 | -0.56 | -2.39 | -0.55 | -2.14 |       |
| GFAP      | 2670   | NM_002055    | 15416 | -0.62 | -0.30 | -0.35 | 0.82  | 1.21  | 0.76  | -0.92 | -0.63 | -0.59 | -1.27 | 2.79  | -2.15 |       |
| FT21A     | 199223 | NM_145755    | 15417 | -0.43 | 0.22  | 0.17  | 1.62  | 1.84  | 1.22  | -0.73 | -0.71 | -0.70 | -0.04 | 4.48  | -2.15 |       |
| LAMAS     | 391    | NM_005560    | 15418 | -0.59 | -0.78 | -0.27 | 0.94  | 0.78  | 0.04  | -0.89 | -0.71 | -0.61 | -1.93 | 0.76  | -2.15 |       |
| DVL2      | 1866   | NM_004422    | 15419 | -0.57 | -0.41 | -0.56 | 0.59  | 1.90  | 0.78  | -0.70 | -0.81 | -0.64 | -1.54 | 3.27  | -2.15 |       |
| MA01      | 54363  | NM_017545    | 15420 | -0.40 | -0.85 | -0.85 | 0.32  | 1.14  | 0.60  | -0.19 | -1.12 | -0.84 | -2.10 | 2.07  | -2.15 |       |
| LOC22570  | 7993   | NM_020472    | 15421 | -0.36 | -0.69 | -0.78 | 0.87  | 0.68  | 0.78  | -0.38 | -0.27 | -0.64 | -1.83 | 0.69  | -2.15 |       |
| MK-STX    | 51657  | NM_016086    | 15422 | -0.11 | 0.20  | -0.09 | 1.59  | 2.52  | 2.14  | -0.62 | -0.71 | -0.81 | -0.22 | 6.26  | -2.15 |       |
| KMA0934   | 22982  | NM_014974    | 15423 | -0.66 | -0.61 | -0.31 | -0.42 | 1.22  | 1.15  | -0.48 | -0.95 | -0.71 | -1.58 | 1.94  | -2.15 |       |
| SNS1      | 616    | NM_020482    | 15424 | -0.68 | -0.59 | -0.58 | -0.18 | -1.05 | -0.18 | -1.25 | -1.16 | -0.84 | -0.64 | 6.86  | -2.15 |       |
| FBOZ2     | 26232  | NM_012168    | 15425 | 0.55  | 0.37  | -0.02 | 1.02  | 0.87  | -0.10 | 0.84  | -0.68 | -0.63 | -1.84 | 1.79  | -2.15 |       |
| BANP      | 54971  | NM_079837    | 15426 | 0.14  | -0.80 | -0.57 | -0.11 | 0.12  | 0.30  | -0.29 | -1.01 | -0.85 | -1.24 | 0.30  | -2.15 |       |
| KRTHA2    | 3892   | NM_002278    | 15427 | -1.07 | -0.75 | -0.96 | 0.64  | 1.02  | 0.11  | -0.65 | -0.71 | -0.80 | -2.77 | 1.77  | -2.15 |       |
| PA04      | 23569  | NM_012887    | 15428 | -0.55 | -0.87 | -0.63 | 0.66  | 0.85  | 0.68  | -0.66 | -0.85 | -0.74 | -1.74 | 1.08  | -2.15 |       |
| PPP1R14A  | 94274  | NM_033256    | 15429 | -0.67 | -0.93 | -0.76 | -0.16 | 0.41  | -0.52 | -0.72 | -0.98 | -0.45 | -2.37 | -0.28 | -2.15 |       |
| LOC442578 | 442578 | NM_001013739 | 15430 | -0.23 | 0.24  | -0.26 | 2.22  | 2.48  | 2.03  | -0.41 | -0.75 | -0.99 | -0.24 | 6.74  | -2.15 |       |
| ACN1      | 617    | NM_010655    | 15431 | -1.36 | -1.63 | -1.63 | -0.22 | -0.22 | -0.22 | -1.02 | -1.02 | -0.51 | -4.95 | 7.53  | -2.15 |       |
| NGN3      | 54413  | NM_018977    | 15432 | -0.60 | -0.85 | -0.54 | -0.30 | 0.19  | 0.24  | -0.56 | -0.74 | -0.85 | -1.99 | 0.13  | -2.15 |       |
| RP17A     | 6157   | NM_000990    | 15433 | -0.69 | -0.29 | -1.18 | 0.47  | 0.78  | -0.15 | -0.87 | -0.36 | -0.93 | -2.16 | 1.10  | -2.15 |       |
| GNL1      | 617    | NM_020482    | 15434 | -0.67 | -0.37 | -0.66 | 0.37  | 0.84  | -0.67 | -0.84 | -0.67 | -0.84 | -1.63 | 1.16  | -2.15 |       |
| KMA0564   | 23978  | NM_001009814 | 15435 | -0.71 | 0.33  | -0.03 | 3.71  | 1.93  | 2.44  | -1.03 | -0.26 | -0.86 | -0.41 | 8.08  | -2.15 |       |
| THBS1     | 7057   | NM_003246    | 15436 | -0.54 | -0.12 | -0.50 | 0.86  | 0.35  | 0.93  | -0.85 | -0.32 | -0.98 | -0.91 | 2.14  | -2.15 |       |
| TTFA      | 2138   | NM_000126    | 15437 | -1.01 | -1.34 | -1.30 | -1.19 | -0.80 | -0.93 | -0.73 | -0.66 | -0.77 | -3.95 | -2.89 | -2.15 |       |
| GNL1      | 8183   | NM_020482    | 15438 | -0.24 | -0.46 | -0.22 | 1.15  | 0.62  | 0.86  | -1.15 | -0.62 | -0.82 | -1.91 | 3.82  | -2.15 |       |
| RCRTR1    | 55213  | NM_018191    | 15439 | -1.00 | -0.25 | -0.06 | 0.65  | 0.72  | 1.04  | -0.48 | -0.71 | -0.96 | -1.31 | 2.41  | -2.15 |       |
| KRPL      | 63943  | NM_022110    | 15440 | -0.22 | 0.33  | -0.51 | 2.06  | 1.53  | 2.64  | -0.50 | -0.65 | -1.00 | 0.04  | 6.22  | -2.16 |       |
| FTT83     | 1047   | NM_010204    | 15441 | -0.55 | -0.99 | -1.14 | 1.19  | 0.12  | 0.57  | -0.62 | -0.57 | -0.62 | -2.68 | 0.63  | -2.16 |       |
| UCP3      | 7352   | NM_022803    | 15442 | -0.45 | -0.28 | -0.95 | 0.66  | 0.30  | 0.66  | -0.52 | -0.69 | -0.95 | -1.68 | 1.02  | -2.16 |       |
| THOC3     | 84121  | NM_032361    | 15443 | -0.80 | -1.31 | -1.04 | -0.25 | -0.31 | -0.75 | -0.47 | -0.96 | -0.73 | -3.15 | -1.31 | -2.16 |       |
| GNL1      | 5387   | NM_020482    | 15444 | -0.20 | 0.05  | -0.05 | 1.09  | 1.34  | 2.08  | -0.46 | -0.64 | -0.80 | -4.51 | -1.16 | -2.16 |       |
| MGC45416  | 132299 | NM_152398    | 15445 | 0.86  | 0.32  | -0.43 | 0.01  | 0.39  | 0.79  | -0.81 | -0.64 | -0.71 | 1.61  | 1.19  | -2.16 |       |
| LOC342897 | 342897 | NM_001001414 | 15446 | -1.16 | -0.92 | -1.18 | 0.87  | 3.02  | 2.80  | -0.26 | -0.97 | -0.92 | -3.25 | 6.68  | -2.16 |       |
| OND7      | 29883  | NM_054026    | 15447 | -0.69 | -0.43 | -0.51 | 0.19  | -0.08 | 0.59  | -0.67 | -0.65 | -0.83 | -1.72 | 0.70  | -2.16 |       |
| DPA       | 1107   | NM_000948    | 15448 | 0.04  | 0.44  | -0.57 | 0.55  | 0.63  | 1.59  | -0.64 | -0.69 | -0.53 | -0.58 | 6.63  | -2.16 |       |
| FLJ3860   | 284756 | NM_173644    | 15449 | -0.42 | -0.59 | -0.41 | 2.50  | 2.59  | 1.54  | -0.64 | -0.99 | -0.53 | -0.58 | 6.63  | -2.16 |       |
| CDORF70   | 85395  | NM_058190    | 15450 | -0.66 | -1.13 | -0.47 | 1.74  | 0.87  | 1.01  | -0.58 | -0.91 | -0.67 | -2.26 | 3.62  | -2.16 |       |
| PHO1      | 39965  | NM_000304    | 15451 | -1.04 | -0.50 | -0.74 | 1.25  | 2.18  | 1.58  | -0.84 | -1.05 | -0.84 | -1.68 | 6.22  | -2.16 |       |
| WFD01D    | 140832 | NM_080753    | 15452 | -0.83 | -0.76 | -0.88 | 0.29  | -0.23 | -0.30 | -0.89 | -0.63 | -0.64 | -2.47 | -0.25 | -2.16 |       |
| MGC1943   | 340307 | NM_178561    | 15453 | -1.03 | -0.73 | -1.24 | -0.64 | -0.45 | -0.17 | -0.95 | -0.52 | -0.69 | -3.01 | -1.26 | -2.16 |       |
| RP35010   | 9857   | NM_000810    | 15454 | -0.97 | -0.02 | -0.27 | 1.02  | 1.05  | 0.27  | -0.84 | -0.27 | -0.62 | -0.87 | 2.54  | -2.16 |       |
| NDUF9F    | 4712   | NM_182739    | 15455 | 0.92  | 0.34  | -0.10 | 1.29  | 1.18  | 1.43  | -1.00 | -0.42 | -0.75 | 0.90  | 2.16  | -2.16 |       |
| ITGAS     | 3678   | NM_002205    | 15456 | -0.35 | -0.44 | -0.32 | 0.80  | 1.50  | 0.61  | -0.82 | -0.79 | -0.55 | -1.11 | 2.91  | -2.16 |       |
| C12NF4    | 11490  | NM_031269    | 15457 | -0.29 | -0.95 | -0.44 | 1.29  | 1.42  | 0.71  | -0.50 | -1.12 | -0.54 | -1.68 | 3.43  | -2.16 |       |
| TAF4      | 6074   | NM_003185    | 15458 | -1.29 | -1.31 | -1.71 | 0.41  | -0.49 | -0.77 | -1.01 | -0.49 | -0.77 | -4.33 | 8.46  | -2.16 |       |
| GNL1      | 64223  | NM_022172    | 15459 | -1.19 | -0.28 | -1.31 | -0.22 | 1.25  | 0.15  | -0.58 | -0.74 | -0.85 | -2.79 | 1.18  | -2.16 |       |
| KRFB18    | 2281   | NM_004116    | 15460 | -0.50 | -0.63 | -0.53 | 1.17  | 0.59  | 0.14  | -0.84 | -0.67 | -0.65 | -1.67 | 1.89  | -2.17 |       |
| PKNOX2    | 739    | NM_0207057   | 15461 | -0.42 | -0.77 | -0.65 | 0.69  | 0.46  | 0.59  | -0.62 | -0.65 | -0.76 | -1.25 | 1.23  | -2.17 |       |
| FLJ1238   | 285386 | NM_198485    | 15462 | -1.08 | -0.31 | -1.28 | -0.40 | 0.36  | 0.00  | -0.7  |       |       |       |       |       |       |



|            |        |             |       |       |       |       |       |       |       |       |       |       |       |       |       |
|------------|--------|-------------|-------|-------|-------|-------|-------|-------|-------|-------|-------|-------|-------|-------|-------|
| IMDZC      | 23881  | NM_015061   | 15545 | -0.45 | -0.67 | -0.35 | 1.16  | 0.14  | 1.19  | -0.58 | -0.95 | -0.66 | -1.47 | 2.49  | -2.20 |
| FLJ2321879 | 15580  | NM_012709   | 15546 | -0.25 | -0.52 | -0.01 | 0.78  | -0.99 | 0.46  | -0.76 | -0.89 | -0.66 | -1.06 | 0.80  | -2.08 |
| MAPK8P3    | 23162  | NM_033392   | 15547 | -0.74 | -0.31 | -0.85 | 0.00  | -0.18 | 0.53  | -0.78 | -0.51 | -0.91 | -1.00 | 0.34  | -2.20 |
| GSPT2      | 23708  | NM_018094   | 15548 | -0.75 | -0.75 | -0.94 | 0.51  | 0.65  | -0.07 | -0.71 | -0.83 | -0.67 | -2.44 | 1.09  | -2.20 |
| CLCA4      | 25932  | NM_013943   | 15549 | -1.18 | -1.19 | -1.23 | -0.23 | 0.36  | 0.18  | -0.31 | -0.78 | -1.11 | -3.59 | 0.31  | -2.20 |
| LTDH4H     | 22949  | NM_012112   | 15550 | -0.92 | 0.74  | -0.84 | 0.84  | 1.35  | -0.51 | -0.84 | -0.98 | -0.38 | -1.63 | 1.94  | -2.20 |
| TAC4       | 255061 | NM_00107505 | 15551 | -0.66 | -0.95 | -0.33 | -0.45 | 0.43  | 1.57  | -0.54 | -0.73 | -0.93 | -1.93 | 1.56  | -2.20 |
| PPAN       | 56342  | NM_020230   | 15552 | -1.45 | -1.51 | -1.48 | -0.80 | -1.07 | -1.09 | -0.87 | -0.77 | -0.56 | -4.43 | -2.95 | -2.20 |
| GALNT3     | 89792  | NM_032036   | 15553 | -0.67 | -1.13 | -0.97 | -0.41 | 0.84  | 0.84  | -1.01 | -0.67 | -0.56 | -2.60 | 0.73  | -2.20 |
| ACNA4      | 55515  | NM_182847   | 15554 | -0.64 | -0.67 | -0.65 | -0.34 | 0.69  | 0.92  | -0.59 | -0.69 | -0.92 | -1.96 | 1.27  | -2.21 |
| TALD01     | 6888   | NM_006755   | 15555 | -0.57 | -0.91 | -0.96 | 2.68  | 0.90  | 1.03  | -0.86 | -0.48 | -0.87 | -2.44 | 4.61  | -2.21 |
| MGC1387325 | 20137  | NM_020933   | 15556 | -0.45 | -0.03 | -0.44 | 0.80  | -0.82 | -0.53 | -0.92 | -1.52 | -0.72 | -0.92 | 5.58  | -2.21 |
| LLRI181    | 8809   | NM_003855   | 15557 | -0.17 | 1.21  | 0.65  | 1.44  | 1.36  | 0.77  | -0.76 | -1.37 | -0.88 | 0.73  | 3.57  | -2.21 |
| GRK7       | 131890 | NM_139209   | 15558 | -0.76 | -0.89 | -0.19 | 0.27  | 0.90  | 0.64  | -0.74 | -1.04 | -0.43 | -1.84 | 1.81  | -2.21 |
| NFYSF11    | 8600   | NM_033012   | 15559 | -0.48 | -0.51 | -0.37 | 1.07  | 1.93  | 1.25  | -0.56 | -0.82 | -0.83 | -1.36 | 4.85  | -2.21 |
| MAPK2      | 6618   | NM_003083   | 15560 | -0.96 | -0.88 | -1.46 | 0.11  | -0.76 | -0.25 | -0.83 | -0.31 | -1.07 | -3.30 | 0.90  | -2.21 |
| NACSN1     | 23301  | NM_015252   | 15561 | -1.04 | -0.77 | 0.27  | 0.35  | 1.04  | 1.12  | -0.87 | -0.96 | -0.37 | -1.54 | 2.52  | -2.21 |
| MGC11017   | 91388  | NM_080656   | 15562 | -0.48 | -0.36 | -1.10 | 0.48  | -0.28 | 0.41  | -0.52 | -0.65 | -1.04 | -1.94 | 0.61  | -2.21 |
| TUFT1      | 7286   | NM_020127   | 15563 | -0.82 | -0.77 | -0.80 | 1.29  | 1.21  | 2.13  | -0.70 | -0.55 | -0.86 | -2.49 | 4.63  | -2.21 |
| FLJ25773   | 283598 | NM_182560   | 15564 | -0.08 | 0.18  | -0.72 | 1.46  | 2.82  | 1.44  | -0.48 | -0.80 | -0.93 | -0.62 | 5.72  | -2.21 |
| FLJ10996   | 54520  | NM_019044   | 15565 | -0.07 | -0.92 | 0.00  | 1.21  | 0.01  | 0.71  | -0.51 | -0.98 | -0.72 | -1.00 | 1.93  | -2.21 |
| PDU2P3     | 25833  | NM_014552   | 15566 | 0.33  | -0.90 | -0.65 | 0.38  | 1.08  | 1.29  | -0.24 | -0.96 | -1.04 | -1.22 | 2.75  | -2.21 |
| PSA1       | 29968  | NM_021154   | 15567 | 0.46  | 0.71  | -0.68 | 0.50  | 0.45  | 1.06  | 0.54  | -0.78 | -0.89 | 1.85  | 2.01  | -2.21 |
| SDCCAG3    | 10807  | NM_006643   | 15568 | -0.25 | -0.56 | -0.24 | 1.36  | 1.27  | 0.85  | -0.61 | -0.75 | -0.85 | -1.05 | 3.48  | -2.21 |
| INVS       | 11349  | NM_007073   | 15569 | -0.51 | -0.56 | -0.09 | 1.51  | 2.34  | 1.94  | -0.58 | -0.99 | -0.64 | -1.16 | 5.79  | -2.21 |
| SCGR1A1    | 92304  | NM_020863   | 15570 | -1.04 | -0.33 | -0.78 | 0.14  | 0.71  | 0.46  | -0.96 | -0.50 | -0.75 | -2.14 | 1.31  | -2.21 |
| PFN1       | 5216   | NM_050202   | 15571 | -0.48 | -0.65 | -0.64 | 0.64  | 0.87  | 0.53  | -0.51 | -0.97 | -0.73 | -1.77 | 2.04  | -2.21 |
| ROR01      | 64221  | NM_022720   | 15572 | -0.51 | -1.01 | -1.20 | -0.39 | -0.31 | 0.43  | -0.53 | -0.60 | -1.09 | -2.72 | 0.54  | -2.21 |
| VFN        | 7448   | NM_053638   | 15573 | -1.04 | -1.00 | -1.20 | 0.90  | -0.36 | 0.41  | -0.74 | -0.60 | -0.92 | -3.30 | 1.71  | -2.21 |
| CUTL2      | 23316  | NM_015267   | 15574 | -0.75 | -1.08 | -0.82 | -0.51 | -0.30 | 0.73  | -0.68 | -1.02 | -0.51 | -2.65 | 1.54  | -2.21 |
| NP25       | 29114  | NM_00100823 | 15575 | -0.02 | -0.81 | -0.38 | 1.05  | 0.27  | 0.74  | -0.66 | -1.03 | -0.52 | -1.22 | 2.07  | -2.21 |
| ACTG1      | 71     | NM_057614   | 15576 | -0.79 | -0.65 | -0.75 | 1.13  | 0.88  | 0.68  | -0.95 | -1.13 | -0.64 | -2.20 | 6.64  | -2.21 |
| KIAA1189   | 57471  | NM_00100959 | 15577 | 0.04  | 0.11  | 0.00  | 1.28  | 0.44  | 0.77  | -0.97 | -0.53 | -0.71 | -0.75 | 4.49  | -2.21 |
| NMB        | 4828   | NM_205858   | 15578 | -0.84 | -0.72 | -0.81 | 0.35  | 0.15  | -0.07 | -0.94 | -0.68 | -0.59 | -2.37 | 0.43  | -2.21 |
| PCDH11     | 56123  | NM_018933   | 15579 | -0.69 | -1.06 | -0.28 | -0.37 | 0.17  | 0.59  | -0.84 | -0.93 | -0.44 | -2.03 | 0.99  | -2.21 |
| FLJ33892   | 33862  | NM_207354   | 15580 | -0.01 | 1.56  | -0.23 | 1.80  | 4.05  | 2.05  | -0.65 | -0.25 | -0.93 | 1.23  | 7.97  | -2.21 |
| MYBP3      | 4607   | NM_000256   | 15581 | -0.92 | -0.68 | -1.15 | 0.57  | -0.28 | -0.54 | -0.88 | -0.57 | -0.76 | -2.76 | -0.25 | -2.22 |
| PH2        | 5555   | NM_005042   | 15582 | -0.65 | -1.14 | -0.89 | 0.34  | 0.44  | 0.62  | -0.95 | -0.47 | -0.80 | -1.68 | 1.39  | -2.22 |
| PI3        | 3389   | NM_020167   | 15583 | -1.11 | -0.98 | -1.95 | 0.47  | -0.12 | 0.14  | -1.11 | -0.72 | -0.92 | -2.02 | 0.78  | -2.22 |
| MAP3K4     | 4216   | NM_006724   | 15584 | -0.42 | -0.08 | -0.94 | 0.44  | 0.95  | 2.13  | -0.55 | -0.59 | -1.07 | -1.44 | 3.52  | -2.22 |
| PLSCR4     | 57888  | NM_020153   | 15585 | -0.56 | -0.82 | -0.10 | 0.50  | 0.18  | 0.44  | -0.79 | -0.81 | -0.61 | -1.48 | 1.12  | -2.22 |
| FLJ25956   | 26159  | NM_020159   | 15586 | -0.64 | -0.64 | -0.67 | 0.64  | -0.67 | 0.64  | -0.79 | -1.07 | -0.82 | -1.64 | 1.19  | -2.22 |
| UNC118     | 10499  | NM_006377   | 15587 | -0.51 | -0.78 | -0.72 | 0.63  | 0.76  | 0.30  | -0.35 | -0.97 | -0.90 | -0.99 | 1.70  | -2.22 |
| FLJ23231   | 80149  | NM_025079   | 15588 | -1.10 | -0.86 | -0.63 | 0.16  | -0.37 | 0.75  | -1.00 | -0.64 | -0.57 | -2.60 | 0.54  | -2.22 |
| HBA1       | 3039   | NM_000558   | 15589 | -1.28 | -0.77 | -1.25 | -0.39 | -0.53 | -0.53 | -0.81 | -0.51 | -0.90 | -3.30 | -1.46 | -2.22 |
| ADPS4      | 485    | NM_004557   | 15590 | -0.18 | -0.76 | -0.72 | 0.62  | -0.90 | 0.60  | -0.42 | -0.80 | -0.62 | -0.80 | 0.45  | -2.22 |
| CD36       | 948    | NM_000072   | 15591 | -0.55 | -0.31 | -0.32 | 1.26  | 1.14  | 1.29  | -0.80 | -0.67 | -0.75 | -1.19 | 3.68  | -2.22 |
| PHS4       | 51588  | NM_015897   | 15592 | -0.81 | -1.00 | -0.54 | 1.64  | 1.35  | 1.45  | -0.55 | -0.89 | -0.78 | -2.35 | 4.44  | -2.22 |
| PARIS2     | 5919   | NM_000889   | 15593 | -0.99 | -1.09 | -1.09 | 0.20  | -0.20 | 0.20  | -0.99 | -1.09 | -1.09 | -3.07 | 1.99  | -2.22 |
| MGC5501    | 80724  | NM_025247   | 15594 | -0.68 | -0.57 | -1.00 | 1.29  | 0.99  | 0.25  | -0.84 | -0.59 | -0.79 | -2.25 | 2.53  | -2.22 |
| ZNF3       | 7551   | NM_017175   | 15595 | 0.00  | -0.22 | -0.45 | 1.40  | 1.36  | 1.57  | -0.59 | -0.86 | -0.76 | -0.67 | 4.32  | -2.22 |
| FLJ33553   | 15280  | NM_020153   | 15596 | -1.03 | -1.31 | -1.58 | -0.36 | -0.73 | -0.73 | -0.81 | -0.73 | -0.81 | -3.92 | -2.83 | -2.22 |
| MGC35402   | 396669 | NM_203907   | 15597 | 0.88  | 1.05  | -1.34 | -0.80 | -0.83 | -0.90 | -0.64 | -0.88 | -0.70 | -3.28 | -2.52 | -2.22 |
| OAZN       | 51582  | NM_148174   | 15598 | -0.85 | -0.65 | -0.72 | 0.10  | -0.01 | -0.38 | -0.90 | -0.67 | -0.66 | -2.22 | -0.30 | -2.22 |
| ARE3       | 407    | NM_004412   | 15599 | -0.25 | -0.54 | -1.26 | 0.53  | 0.82  | 1.52  | -0.44 | -0.54 | -1.24 | -2.05 | 2.86  | -2.22 |
| ARID2      | 499    | NM_020248   | 15600 | -0.38 | -0.46 | -0.51 | 0.62  | 1.00  | 0.20  | -0.72 | -1.02 | -0.42 | -3.23 | 3.23  | -2.22 |
| C16ORF7    | 9605   | NM_004913   | 15601 | -1.16 | -0.47 | -0.59 | 0.39  | 0.44  | 0.68  | -0.88 | -0.61 | -0.74 | -2.52 | 1.51  | -2.22 |
| GRP        | 2932   | NM_00102512 | 15602 | -0.72 | -0.70 | -1.09 | 0.83  | 1.69  | 1.14  | -0.67 | -0.78 | -0.77 | -2.22 | 2.65  | -2.22 |
| C16ORF15   | 20291  | NM_015645   | 15603 | -0.22 | -0.85 | -0.86 | 1.47  | 0.85  | 1.73  | -0.63 | -0.47 | -0.82 | -1.82 | 3.41  | -2.22 |
| TERF2P2    | 54386  | NM_018975   | 15604 | -0.66 | -0.54 | -0.82 | -0.45 | 1.04  | 0.66  | -0.45 | -0.80 | -0.97 | -2.02 | 1.25  | -2.22 |
| DEFB13     | 245927 | NM_00103729 | 15605 | -0.81 | -0.58 | -0.79 | 2.31  | 0.84  | 1.88  | -0.89 | -0.48 | -0.86 | -2.18 | 5.03  | -2.22 |
| FLJ33555   | 41515  | NM_02016152 | 15606 | -0.38 | 0.06  | -1.04 | 3.74  | 4.63  | 3.84  | -0.62 | -0.84 | -0.68 | -1.49 | 15.78 | -2.22 |
| C18ORF41   | 79839  | NM_024781   | 15607 | -0.13 | -0.10 | -1.15 | 0.13  | 0.12  | 1.15  | -0.46 | -0.56 | -1.20 | -1.44 | 1.39  | -2.22 |
| VORC1      | 79001  | NM_206824   | 15608 | -0.75 | -0.45 | -0.66 | 0.97  | 0.21  | 1.75  | -0.85 | -0.52 | -0.85 | -1.86 | 2.92  | -2.22 |
| LEF3       | 3609   | NM_153944   | 15609 | -1.17 | -1.33 | -1.57 | -0.57 | 1.06  | 0.28  | -0.50 | -0.91 | -0.82 | -4.07 | 0.75  | -2.22 |
| TRIP11     | 37054  | NM_207138   | 15610 | -0.24 | -1.17 | -0.73 | 0.59  | 0.67  | 0.67  | -0.44 | -1.12 | -0.62 | -2.12 | 1.89  | -2.22 |
| LOC158724  | 158724 | NM_203408   | 15611 | -0.79 | -0.79 | -0.07 | -0.55 | 0.78  | -0.60 | -0.68 | -0.94 | -2.62 | 0.17  | -2.23 |       |
| SEPRNA5    | 5304   | NM_000624   | 15612 | -1.07 | -1.16 | -1.10 | -0.49 | -0.26 | -0.91 | -0.78 | -1.08 | -0.36 | -3.33 | -1.66 | -2.23 |
| TAL2       | 687    | NM_005021   | 15613 | -1.41 | -1.69 | -1.84 | -0.45 | -0.42 | -0.59 | -1.42 | -0.53 | -0.88 | -3.33 | 1.46  | -2.23 |
| PMPCA      | 23203  | NM_015160   | 15614 | -0.68 | -0.89 | -0.87 | 0.25  | 0.03  | 0.58  | -0.55 | -0.77 | -0.91 | -2.43 | 0.86  | -2.23 |
| CA6        | 765    | NM_001215   | 15615 | -1.21 | -1.03 | -1.19 | 0.09  | -1.10 | -0.48 | -1.16 | -0.56 | -0.51 | -3.44 | -1.49 | -2.23 |
| PHOS11     | 113809 | NM_020192   | 15616 | -0.03 | -0.62 | -0.82 | 1.11  | 0.87  | 0.82  | -1.11 | -0.82 | -0.82 | -1.67 | 2.09  | -2.23 |
| ZNF482     | 10773  | NM_006626   | 15617 | 0.60  | 0.50  | -0.73 | 0.90  | 0.07  | 0.27  | -0.88 | -0.66 | -0.69 | -1.83 | 1.24  | -2.23 |
| CACNG2     | 10369  | NM_006078   | 15618 | -0.88 | -0.86 | -1.10 | 1.37  | 0.80  | 0.65  | -0.63 | -0.68 | -0.92 | -2.43 | 2.82  | -2.23 |
| MPLR4L     | 28977  | NM_172177   | 15619 | -0.45 | -1.05 | -0.99 | 0.11  | 0.26  | 0.89  | -0.57 | -0.63 | -1.02 | -2.70 | 1.26  | -2.23 |
| MGC11096   | 84306  | NM_020136   | 15620 | -0.39 | -0.67 | -0.44 | 0.61  | 0.09  | 0.86  | -0.61 | -0.77 | -0.68 | -2.07 | 0.67  | -2.23 |
| TLR2       | 7097   | NM_003264   | 15621 | -0.76 | 0.03  | -1.08 | 0.82  | 1.29  | 1.38  | -0.45 | -0.67 | -1.10 | -1.82 | 3.49  | -2.23 |
| LOC202459  | 202459 | NM_145303   | 15622 | -0.04 | -0.27 | 0.09  | 0.99  | 1.79  | 2.33  | -0.59 | -0.68 | -0.96 | -0.22 | 5.11  | -2.23 |
| MFRN1      | 4068   | NM_004097   | 15623 | -1.05 | -1.03 | -0.71 | 0.98  | 1.02  | 0.88  | -1.02 | -1.22 | -0.75 | -2.75 | 0.17  | -2.23 |
| SBF1       | 6305   | NM_020972   | 15624 | -0.01 | -0.14 | 0.17  | 1.64  | 2.54  | 2.52  | -0.74 | -0.68 | -0.80 | 0.04  |       |       |

|             |        |              |       |       |       |       |       |       |       |       |       |       |       |       |       |
|-------------|--------|--------------|-------|-------|-------|-------|-------|-------|-------|-------|-------|-------|-------|-------|-------|
| PGM2L1      | 283209 | NM_173582    | 15707 | 0.19  | -0.15 | -0.41 | 1.88  | 2.28  | 1.84  | -0.54 | -0.83 | -0.89 | -0.37 | 6.00  | -2.26 |
| ICORF35     | 210708 | NM_003936    | 15708 | -0.17 | 0.55  | -0.09 | 1.71  | 2.30  | 2.61  | -0.71 | -0.46 | -0.88 | -0.37 | 6.00  | -2.26 |
| NP91        | 4881   | NM_000906    | 15709 | 0.55  | 0.50  | -0.32 | 0.68  | 0.50  | 1.06  | -0.81 | -0.57 | -0.78 | -1.40 | 2.24  | -2.26 |
| STK29       | 9024   | NM_003957    | 15710 | 0.11  | -0.51 | -0.91 | 0.65  | 0.59  | 0.34  | -0.60 | -0.80 | -0.86 | -1.31 | 1.59  | -2.27 |
| TRM11       | 81559  | NM_145214    | 15711 | 2.12  | 0.43  | 2.25  | 9.00  | 6.31  | 6.42  | -0.86 | -0.80 | -0.60 | 4.80  | 22.33 | -2.27 |
| NP91        | 365    | NM_002194    | 15712 | 0.18  | -0.18 | -0.23 | 0.20  | 0.20  | 0.20  | -0.48 | -1.02 | -0.24 | 0.33  | 0.24  | -2.27 |
| CSORF102    | 56999  | NM_001024155 | 15713 | -0.22 | -0.93 | -0.98 | 0.29  | 0.28  | 0.24  | -0.44 | -0.84 | -0.99 | -2.13 | 0.81  | -2.27 |
| PF20        | 79582  | NM_001025436 | 15714 | -1.04 | -0.70 | -1.02 | -0.86 | -0.57 | 0.17  | -0.70 | -0.73 | -0.83 | -2.77 | -1.27 | -2.27 |
| ZNF543      | 225913 | NM_010123599 | 15715 | 0.66  | 0.54  | 0.71  | 1.60  | 1.60  | 1.60  | -0.66 | -0.66 | -0.66 | 1.90  | 2.68  | -2.27 |
| HRMTL4      | 56341  | NM_019854    | 15716 | -1.10 | -0.63 | -0.77 | 0.13  | -0.78 | -0.02 | -0.83 | -0.46 | -0.98 | -2.51 | -0.67 | -2.27 |
| CC14        | 6358   | NM_023263    | 15717 | -0.71 | -0.52 | -0.72 | 1.97  | 0.47  | 0.82  | -0.96 | -0.63 | -0.68 | -1.96 | 3.27  | -2.27 |
| PF45        | 575    | NM_01010975  | 15718 | -0.64 | -0.41 | -0.21 | 0.57  | 1.23  | 0.93  | -0.57 | -1.03 | -0.93 | -1.27 | 1.11  | -2.27 |
| LOC126075   | 126275 | NM_001088003 | 15719 | -0.74 | 1.26  | -0.22 | 0.20  | -0.59 | -0.39 | -0.78 | -1.12 | -0.38 | -2.22 | -0.79 | -2.27 |
| IGR7        | 59350  | NM_021634    | 15720 | 0.40  | 0.80  | -0.07 | 2.06  | 2.17  | 2.52  | -0.70 | -0.78 | -0.79 | 1.13  | 6.76  | -2.27 |
| INR5F19     | 55504  | NM_018647    | 15721 | -0.35 | -0.61 | -0.52 | -0.34 | 1.13  | 0.19  | -0.44 | -1.02 | -0.80 | -1.48 | 0.95  | -2.27 |
| PSID        | 51538  | NM_016505    | 15722 | -0.63 | 0.35  | 0.41  | 1.00  | 0.89  | 1.44  | -0.78 | -0.65 | -0.84 | -1.40 | 3.34  | -2.27 |
| FAT4        | 79633  | NM_024582    | 15723 | -0.43 | -0.51 | -0.83 | 0.47  | 0.60  | 0.40  | -0.63 | -0.76 | -0.88 | -1.77 | 1.47  | -2.27 |
| BEAL1       | 56271  | NM_001127688 | 15724 | -0.55 | -0.54 | -0.74 | 0.32  | 0.71  | 0.30  | -0.91 | -0.42 | -0.95 | -1.83 | 1.33  | -2.27 |
| TNCC2       | 7122   | NM_003279    | 15725 | -0.95 | -1.00 | -0.19 | -0.27 | -0.05 | 0.11  | -0.51 | -0.55 | -0.41 | -2.14 | 0.21  | -2.27 |
| PPP1R15B    | 84919  | NM_032833    | 15726 | -0.70 | -0.21 | -0.21 | 1.13  | 2.02  | 1.78  | -1.03 | -0.56 | -0.68 | -1.12 | 5.33  | -2.27 |
| LOC646627   | 646627 | NM_001085474 | 15727 | -0.18 | -0.09 | 0.48  | 2.08  | 0.91  | 1.37  | -1.09 | -0.75 | -0.43 | 0.22  | 3.37  | -2.27 |
| TC15        | 6939   | NM_004009    | 15728 | -0.75 | -0.57 | -0.56 | 0.40  | 0.38  | -0.09 | -0.84 | -0.76 | -0.69 | -1.87 | 0.69  | -2.27 |
| ZNF75A      | 7627   | NM_153028    | 15729 | -0.12 | -0.28 | -0.09 | 1.26  | 1.49  | 0.53  | -0.73 | -1.04 | -0.50 | -0.49 | 3.28  | -2.27 |
| FLU2005     | 54821  | NM_017669    | 15730 | -0.07 | -0.68 | -0.60 | 0.79  | 1.31  | 1.56  | -0.62 | -0.92 | -0.73 | -1.34 | 3.66  | -2.27 |
| Chorf80B    | 541578 | NM_001013845 | 15731 | 0.98  | -0.56 | 0.21  | 2.31  | 0.75  | 1.43  | -0.73 | -0.83 | -0.71 | 0.63  | 4.49  | -2.27 |
| APF         | 26060  | NM_012096    | 15732 | -0.80 | -1.02 | -0.21 | 1.91  | 1.05  | 0.81  | -0.90 | -0.84 | -0.53 | -2.09 | 3.79  | -2.27 |
| RABGT8B     | 5876   | NM_004582    | 15733 | -0.46 | -0.87 | 0.13  | 1.17  | 0.37  | 0.80  | -0.71 | -1.08 | -0.48 | -1.20 | 2.33  | -2.27 |
| DMU11       | 7802   | NM_003462    | 15734 | -0.02 | 1.10  | 0.68  | 3.14  | 3.09  | 4.04  | -0.95 | -0.53 | -0.79 | 1.77  | 10.27 | -2.27 |
| PRL         | 567    | NM_000048    | 15735 | -0.25 | 0.68  | -0.46 | 0.65  | 0.65  | 0.65  | -0.82 | -0.75 | -0.69 | -1.38 | 2.87  | -2.27 |
| PHL5        | 122769 | NM_020467    | 15736 | -0.63 | -0.32 | -0.66 | 1.87  | 1.81  | 1.60  | -0.79 | -0.85 | -0.64 | -1.41 | 5.28  | -2.27 |
| OR9A2       | 135924 | NM_00101658  | 15737 | -0.30 | -0.74 | -0.35 | 0.65  | 1.20  | 1.55  | -0.51 | -0.99 | -0.77 | -1.39 | 3.40  | -2.27 |
| PF7A5       | 26579  | NM_020818    | 15738 | -0.57 | -0.66 | -0.86 | 0.67  | 0.78  | 0.61  | -0.74 | -0.80 | -0.81 | -1.29 | 2.51  | -2.27 |
| KUAI1409    | 57978  | NM_020818    | 15739 | -1.08 | -0.14 | -0.41 | 1.13  | 1.58  | 0.51  | -1.14 | -0.47 | -0.66 | -1.64 | 3.22  | -2.27 |
| GABR2       | 2566   | NM_198903    | 15740 | -1.34 | -1.13 | -1.06 | -0.63 | 0.24  | -0.23 | -0.68 | -0.78 | -0.81 | -3.53 | -0.62 | -2.27 |
| CAPG        | 522    | NM_001747    | 15741 | -0.91 | -1.11 | -1.02 | -0.99 | -0.09 | -0.12 | -0.58 | -0.87 | -0.82 | -1.04 | -1.20 | -2.27 |
| CLT3A       | 9746   | NM_047178    | 15742 | -0.55 | 0.56  | 0.74  | 1.25  | 0.86  | 1.38  | -0.25 | -0.66 | -0.84 | -1.36 | 2.23  | -2.27 |
| SLV3        | 6490   | NM_006928    | 15743 | 0.13  | 0.11  | -0.25 | 2.04  | 1.28  | 1.44  | -0.85 | -0.75 | -0.68 | -0.01 | 4.75  | -2.28 |
| R2W         | 28969  | NM_014038    | 15744 | -0.71 | -0.45 | -0.27 | 0.68  | 0.62  | 1.44  | -0.69 | -0.53 | -1.05 | -1.43 | 2.74  | -2.28 |
| FL40817     | 20959  | NM_017669    | 15745 | -0.76 | -0.69 | -0.69 | 0.64  | 0.64  | 0.64  | -0.84 | -0.84 | -0.84 | -1.65 | 2.76  | -2.28 |
| AT0H8       | 84913  | NM_032827    | 15746 | -1.12 | -0.74 | -0.33 | 0.40  | 0.62  | 0.93  | -0.86 | -0.67 | -0.65 | -1.19 | 1.96  | -2.28 |
| UNK         | 85451  | NM_001080419 | 15747 | 0.71  | 1.83  | -0.13 | 7.46  | 7.96  | 4.84  | -0.80 | -0.77 | -0.71 | 2.41  | 20.26 | -2.28 |
| TRM2        | 10852  | NM_000061    | 15748 | -0.64 | -0.71 | -0.61 | 0.60  | 0.60  | 0.60  | -0.60 | -0.60 | -0.60 | -1.96 | 0.54  | -2.28 |
| DKFZP648102 | 83479  | NM_001031725 | 15749 | -0.63 | 0.27  | -0.51 | 0.63  | 0.12  | 1.29  | -0.86 | -0.55 | -0.86 | -1.44 | 2.04  | -2.28 |
| SUC2A21     | 89874  | NM_030631    | 15750 | -1.12 | -0.74 | -0.91 | -1.02 | -0.09 | 0.17  | -0.76 | -0.67 | -0.85 | -2.77 | 0.95  | -2.28 |
| FLU2098     | 54888  | NM_198881    | 15751 | -0.80 | -0.83 | -0.41 | 1.70  | 1.41  | 1.36  | -1.00 | -1.01 | -1.26 | -2.04 | 4.47  | -2.28 |
| NP91        | 913    | NM_000796    | 15752 | 0.84  | 0.16  | -0.83 | 0.28  | 0.21  | 0.79  | -0.76 | -0.43 | -0.76 | -1.83 | 4.29  | -2.28 |
| LOC405753   | 405753 | NM_207581    | 15753 | -1.43 | -1.59 | -1.34 | -1.07 | -0.86 | -0.85 | -0.92 | -0.51 | -0.46 | -2.36 | -2.28 | -2.28 |
| GAMT        | 2593   | NM_138924    | 15754 | -1.10 | -0.93 | -0.90 | 0.41  | 0.20  | -0.30 | -1.04 | -0.66 | -0.58 | -2.93 | 0.32  | -2.28 |
| SCPH5       | 29579  | NM_014575    | 15755 | -0.54 | 0.64  | -0.64 | 0.64  | 0.64  | 0.64  | -0.64 | -0.64 | -0.64 | -1.55 | 2.23  | -2.28 |
| FLJ7396     | 287554 | NM_001725471 | 15756 | -0.25 | -0.34 | -0.82 | 0.08  | 0.70  | -0.08 | -0.66 | -0.78 | -0.85 | -1.41 | 0.71  | -2.28 |
| MCC29784    | 285367 | NM_173659    | 15757 | -0.30 | -0.51 | -0.57 | 0.54  | 0.84  | 1.08  | -0.70 | -0.82 | -0.76 | -1.38 | 2.44  | -2.28 |
| MGC89518    | 33887  | NM_173659    | 15758 | -0.85 | -1.22 | -1.22 | -1.22 | -1.22 | -1.22 | -1.22 | -1.22 | -1.22 | -3.89 | 2.75  | -2.28 |
| LL884P      | 8907   | NM_003883    | 15759 | 0.71  | 0.12  | -0.94 | 1.96  | 1.19  | 2.28  | -1.03 | -0.55 | -0.70 | -1.77 | 1.41  | -2.28 |
| OR5B3       | 416108 | NM_001005469 | 15760 | 1.43  | 0.03  | 0.55  | 3.13  | 3.27  | 2.62  | -0.66 | -0.88 | -0.74 | 2.01  | 9.02  | -2.28 |
| AKRP19      | 10776  | NM_006628    | 15761 | -0.70 | -0.26 | -0.56 | 2.47  | 1.79  | 1.99  | -0.89 | -0.56 | -0.84 | -1.52 | 6.26  | -2.28 |
| LOC405753   | 603    | NM_002034    | 15762 | -0.93 | -0.93 | -0.97 | -0.93 | -0.93 | -0.93 | -0.93 | -0.93 | -0.93 | -2.93 | 0.93  | -2.28 |
| DTG         | 1743   | NM_001933    | 15763 | -0.58 | -0.70 | 0.01  | 1.31  | 1.32  | 1.31  | -0.80 | -0.86 | -0.63 | -1.23 | 3.94  | -2.28 |
| CT5G        | 1511   | NM_001911    | 15764 | -0.68 | -0.69 | -0.90 | 0.23  | 0.32  | 0.07  | -0.84 | -0.65 | -0.79 | -2.27 | 0.49  | -2.28 |
| NT1A1       | 6640   | NM_032908    | 15765 | -0.58 | 0.84  | -0.84 | -0.13 | -0.57 | 1.14  | -0.59 | -0.57 | -0.62 | -2.64 | 2.68  | -2.28 |
| FLU20487    | 55048  | NM_017966    | 15766 | -0.66 | -0.22 | -0.56 | 1.23  | 1.89  | 2.00  | -0.74 | -0.67 | -0.88 | -1.43 | 5.11  | -2.28 |
| CSORF88     | 64855  | NM_001035334 | 15767 | -1.46 | -1.16 | -0.66 | -0.66 | -0.32 | 0.17  | -1.02 | -0.80 | -0.47 | -3.28 | -0.21 | -2.28 |
| CHN1        | 55796  | NM_0010371   | 15768 | -0.35 | -0.60 | -0.73 | 1.50  | 1.85  | 3.08  | -1.08 | -0.81 | -0.61 | -2.16 | 3.85  | -2.28 |
| ZNF556      | 80032  | NM_024967    | 15769 | -0.86 | -0.28 | -0.55 | 1.38  | 1.22  | 1.11  | -0.84 | -0.65 | -0.80 | -1.79 | 3.71  | -2.28 |
| ZNF451      | 26336  | NM_001031623 | 15770 | -1.15 | -1.10 | -0.97 | 0.44  | 0.85  | 0.53  | -0.92 | -0.81 | -0.55 | -3.22 | 1.82  | -2.28 |
| ATF2B3      | 492    | NM_001001344 | 15771 | -1.06 | -1.05 | -0.92 | 0.64  | 0.89  | -0.19 | -0.53 | -1.06 | -0.69 | -2.13 | 1.34  | -2.28 |
| MRP19       | 905    | NM_017963    | 15772 | -0.57 | 0.20  | -0.56 | 0.60  | 0.80  | 0.43  | -0.80 | -0.43 | -0.80 | -1.45 | 2.68  | -2.28 |
| PSD         | 23761  | NM_014338    | 15773 | -0.67 | -0.54 | -0.70 | 0.08  | 0.07  | 0.38  | -0.74 | -0.66 | -0.90 | -1.91 | 0.54  | -2.28 |
| ABAT        | 18     | NM_000663    | 15774 | -0.42 | -0.00 | -0.88 | 2.09  | 2.69  | 1.04  | -0.78 | -0.61 | -0.90 | -1.29 | 5.82  | -2.28 |
| TRM55E      | 8184   | NM_000961    | 15775 | -0.90 | -1.53 | -0.63 | 0.64  | 0.64  | 0.64  | -0.82 | -0.64 | -0.64 | -1.64 | 4.89  | -2.28 |
| ZFYVE20     | 64145  | NM_022340    | 15776 | -0.15 | 0.72  | -0.88 | 0.28  | 0.58  | 0.14  | -0.49 | -0.94 | -0.86 | -1.70 | 1.00  | -2.28 |
| EPN3        | 55040  | NM_017957    | 15777 | -0.97 | -0.87 | -0.14 | 0.16  | 0.40  | 0.69  | -0.75 | -0.93 | -0.61 | -1.97 | 1.25  | -2.28 |
| MGC20994    | 20569  | NM_027339    | 15778 | -0.78 | -0.86 | -0.47 | -0.20 | 0.60  | 0.60  | -0.75 | -1.00 | -0.61 | -2.11 | 0.64  | -2.28 |
| CT5H        | 1512   | NM_148979    | 15779 | 0.46  | -0.57 | -0.57 | 1.89  | 2.05  | 1.30  | -0.90 | -0.53 | -0.86 | -0.45 | 4.75  | -2.28 |
| STK22C      | 81629  | NM_052841    | 15780 | -1.38 | -1.18 | -1.28 | -0.92 | -0.88 | -0.97 | -0.90 | -0.80 | -0.59 | -3.76 | -2.27 | -2.28 |
| IL2BA       | 202636 | NM_172138    | 15781 | -0.80 | -1.05 | -1.05 | -0.49 | -0.41 | -0.52 | -1.00 | -0.91 | -0.36 | -2.98 | -1.47 | -2.28 |
| OR5B8       | 3979   | NM_002057    | 15782 | -0.64 | -0.64 | -0.36 | 1.07  | 0.69  | 0.85  | -1.12 | -0.69 | -0.69 | -1.69 | 1.49  | -2.28 |
| TBL3        | 10007  | NM_006453    | 15783 | -0.86 | -0.42 | -1.25 | 1.06  | 1.23  | 0.31  | -0.91 | -0.59 | -0.80 | -2.54 | 1.99  | -2.28 |
| CL4ORF44    | 145488 | NM_152545    | 15784 | -0.44 | -0.06 | 0.61  | 1.07  | 1.48  | 1.71  | -0.86 | -0.79 | -0.64 | -0.12 | 4.26  | -2.28 |
| FBXW11      | 21210  | NM_033645    | 15785 | -1.00 | -1.80 | -1.14 | -0.63 | -0.62 | -0.62 | -0.68 | -0.62 | -0.62 | -2.94 | 1.85  | -2.28 |
| LENG8       | 114823 | NM_052925    | 15786 | -1.07 | -0.50 | -0.   |       |       |       |       |       |       |       |       |       |

|             |        |              |       |       |       |       |       |       |       |       |       |       |       |       |       |
|-------------|--------|--------------|-------|-------|-------|-------|-------|-------|-------|-------|-------|-------|-------|-------|-------|
| MMAB        | 32625  | NM_052845    | 15869 | -1.07 | -1.11 | -1.23 | 2.21  | 1.59  | 1.68  | -0.62 | -0.82 | -0.88 | -3.54 | 5.49  | -2.32 |
| METAB       | 10892  | NM_021828    | 15870 | -0.07 | -0.60 | -0.80 | 0.49  | 0.87  | 0.74  | -0.42 | -0.86 | -0.88 | -1.45 | 1.44  | -2.22 |
| MOSPO1      | 56180  | NM_019556    | 15871 | 0.45  | 1.03  | -0.83 | -0.06 | -0.32 | -0.18 | -0.51 | -1.02 | -0.80 | -2.11 | -0.56 | -2.33 |
| MGC5297     | 79972  | NM_024091    | 15872 | -0.84 | -0.14 | -0.12 | 1.89  | 1.00  | 2.80  | -1.17 | -0.32 | -0.83 | -1.10 | 5.69  | -2.33 |
| STS         | 6764   | NM_139157    | 15873 | -0.99 | -0.86 | -1.05 | -0.28 | -0.98 | -0.28 | -0.93 | -0.41 | -0.97 | -2.90 | 1.54  | -2.33 |
| LOC329210   | 33924  | NM_0048430   | 15874 | -0.31 | -0.35 | -0.31 | 0.42  | 0.42  | 0.42  | -0.86 | -0.97 | -0.80 | -3.29 | 0.12  | -2.33 |
| APP         | 351    | NM_201414    | 15875 | -0.13 | -0.36 | -0.38 | 1.70  | 0.69  | 2.15  | -0.79 | -0.51 | -1.02 | -0.87 | 4.54  | -2.33 |
| CPFL1       | 51084  | NM_015974    | 15876 | -1.00 | 0.00  | -0.40 | 0.98  | 1.39  | 2.01  | -0.56 | -0.76 | -1.00 | -0.50 | 4.38  | -2.33 |
| HS9B3       | 89877  | NM_018708    | 15877 | -0.19 | 0.19  | -0.12 | 1.86  | 1.71  | 1.13  | -0.29 | -0.50 | -1.18 | -1.18 | 3.83  | -2.33 |
| HGFAC       | 3083   | NM_001528    | 15878 | -1.05 | -1.20 | -0.65 | 0.37  | -0.48 | -0.04 | -0.89 | -0.90 | -0.54 | -2.91 | -0.16 | -2.33 |
| NCAAM2      | 4685   | NM_004540    | 15879 | -0.32 | -1.06 | -1.25 | 0.68  | 0.26  | -0.16 | -0.60 | -0.93 | -0.80 | -2.63 | 0.77  | -2.33 |
| 2662W1      | 26620  | NM_001903    | 15880 | -0.50 | -0.61 | -0.42 | 1.59  | 1.36  | 1.07  | -0.89 | -0.62 | -1.17 | -0.59 | 4.61  | -2.33 |
| RAB7B       | 33832  | NM_177403    | 15881 | 0.84  | -0.07 | 0.03  | 0.70  | 1.52  | 0.96  | -1.04 | -0.84 | -0.46 | -0.88 | 3.18  | -2.33 |
| SOX12       | 6666   | NM_006943    | 15882 | -0.62 | -0.63 | -1.01 | 0.13  | 0.05  | 0.63  | -0.66 | -0.70 | -0.97 | -2.26 | 0.81  | -2.33 |
| MAP2F7      | 5609   | NM_145185    | 15883 | -0.65 | -0.61 | -0.75 | 0.76  | 0.39  | 1.17  | -0.81 | -0.53 | -0.99 | -2.00 | 2.31  | -2.33 |
| NALP5       | 12606  | NM_153447    | 15884 | 0.38  | -0.97 | -1.09 | 0.31  | 0.90  | 0.06  | -0.57 | -0.95 | -0.81 | -2.44 | 1.27  | -2.33 |
| PBM         | 93183  | NM_145167    | 15885 | -0.77 | -0.10 | -0.99 | 1.39  | 0.95  | 0.77  | -0.91 | -0.50 | -0.93 | -1.86 | 3.10  | -2.33 |
| ABO10       | 136371 | NM_080871    | 15886 | -0.96 | -1.10 | -1.26 | -0.46 | 0.30  | -0.90 | -0.61 | -0.93 | -0.79 | -3.22 | -1.06 | -2.33 |
| NSD1        | 64324  | NM_172349    | 15887 | 0.48  | 1.24  | 0.05  | 7.08  | 4.55  | 4.40  | -0.83 | -0.68 | -0.83 | -3.81 | 16.02 | -2.33 |
| ELP3        | 55140  | NM_018091    | 15888 | -0.35 | -0.92 | -0.80 | 0.58  | 1.85  | 0.68  | -0.66 | -1.00 | -0.68 | -2.07 | 3.11  | -2.33 |
| UNC644      | 374918 | NM_198541    | 15889 | -0.68 | -0.29 | -0.90 | 0.36  | 1.06  | 1.27  | -0.78 | -0.67 | -0.88 | -1.87 | 2.68  | -2.33 |
| RAB20       | 55647  | NM_017817    | 15890 | -1.01 | -1.33 | -1.33 | -0.29 | -0.51 | 0.29  | -0.37 | -0.85 | -1.11 | -3.68 | -0.51 | -2.33 |
| COB3C       | 23603  | NM_014325    | 15891 | -1.04 | 0.77  | -1.16 | -0.67 | -0.32 | -0.64 | -0.85 | -0.84 | -0.64 | -2.96 | 1.63  | -2.33 |
| SUC12A7     | 10723  | NM_006598    | 15892 | -1.15 | -0.39 | -1.05 | 0.02  | -0.14 | -0.19 | -1.01 | -0.48 | -0.84 | -2.59 | -0.31 | -2.33 |
| SLA         | 3552   | NM_000575    | 15893 | -1.11 | -1.08 | -1.30 | 0.55  | -0.51 | -0.59 | -1.07 | -0.68 | -0.58 | -3.49 | -0.49 | -2.33 |
| HMOX4       | 1732   | NM_00102593  | 15894 | -0.99 | -1.07 | -1.21 | -0.54 | -0.04 | -1.20 | -0.85 | -0.68 | -0.81 | -3.27 | -2.76 | -2.34 |
| IGSF1       | 3547   | NM_205833    | 15895 | -0.88 | -0.76 | -0.65 | -0.67 | 0.31  | -0.03 | -0.64 | -0.88 | -0.82 | -1.99 | -0.40 | -2.34 |
| PAN3        | 255697 | NM_178584    | 15896 | -0.48 | -1.00 | -0.76 | 0.22  | 0.08  | -0.13 | -0.60 | -0.94 | -0.79 | -2.24 | 0.16  | -2.34 |
| RAB20       | 496    | NM_002350    | 15897 | -0.61 | -0.82 | -0.71 | 1.13  | 0.67  | 1.13  | -0.67 | -1.13 | -0.67 | -2.16 | 1.46  | -2.34 |
| KLRG1       | 102119 | NM_005810    | 15898 | -0.94 | -1.14 | -0.97 | -0.69 | -0.76 | 0.20  | -0.66 | -0.81 | -0.86 | -3.05 | -1.25 | -2.34 |
| SNF1LX      | 150904 | NM_173354    | 15899 | -1.07 | -0.57 | -0.43 | 1.10  | 0.90  | 1.11  | -1.05 | -0.73 | -0.56 | -2.08 | 3.11  | -2.34 |
| STF1        | 65316  | NM_139305    | 15900 | -0.15 | 0.11  | -0.16 | 0.31  | 0.79  | 1.63  | -0.79 | -1.63 | -0.79 | -0.10 | 4.62  | -2.34 |
| CGREF1      | 10669  | NM_006569    | 15901 | 1.37  | -1.03 | 0.49  | 0.19  | -0.17 | 1.09  | -1.13 | -0.98 | -1.23 | -0.59 | 1.12  | -2.34 |
| ERG         | 2078   | NM_182918    | 15902 | -0.66 | -0.52 | 0.08  | 0.78  | 0.32  | 0.08  | -0.94 | -0.46 | -0.93 | -1.97 | 1.19  | -2.34 |
| FTF1C       | 1376   | NM_000998    | 15903 | -0.84 | -0.67 | -0.57 | 1.43  | 1.50  | 2.19  | -0.88 | -0.73 | -0.73 | -2.08 | 5.12  | -2.34 |
| ESF40       | 23289  | NM_153184    | 15904 | 0.54  | -0.58 | -0.03 | 0.52  | 0.48  | 1.62  | -0.72 | -0.48 | -1.62 | -0.69 | 0.52  | -2.34 |
| FLJ4969     | 201627 | NM_152678    | 15905 | 0.30  | 0.01  | 0.04  | 1.74  | 2.99  | 2.85  | -0.55 | -0.84 | -0.95 | -0.35 | 7.58  | -2.34 |
| TAF1C       | 9013   | NM_139353    | 15906 | -0.89 | -0.44 | -0.79 | 0.87  | 0.22  | 2.86  | -0.90 | -0.53 | -0.91 | -2.12 | 1.35  | -2.34 |
| TAF1B       | 402164 | NM_017830    | 15907 | -1.42 | -0.88 | -0.80 | 0.62  | 0.80  | 1.62  | -0.87 | -0.80 | -1.62 | -3.52 | 0.23  | -2.34 |
| SLC4410     | 57282  | NM_022058    | 15908 | 0.21  | -1.10 | -0.62 | -0.86 | 1.66  | 0.83  | -0.39 | -1.18 | -0.78 | -1.51 | 3.35  | -2.34 |
| JH          | 51347  | NM_016281    | 15909 | -0.56 | -0.50 | -0.58 | 1.17  | 0.88  | 0.90  | -0.82 | -0.72 | -0.80 | -1.64 | 3.05  | -2.34 |
| FLJ645      | 163189 | NM_02103876  | 15910 | -1.12 | -0.66 | -0.61 | -0.68 | -0.69 | -0.61 | -0.68 | -0.69 | -0.61 | -2.67 | 6.02  | -2.34 |
| KIAA0323    | 23351  | NM_015299    | 15911 | 0.27  | 0.84  | 0.24  | 1.49  | 2.75  | 3.60  | -0.38 | -1.28 | -0.68 | -0.44 | 7.84  | -2.34 |
| RANBP6      | 26953  | NM_012416    | 15912 | 0.09  | 0.36  | -0.31 | 2.28  | 2.46  | 2.57  | -0.80 | -0.69 | -0.85 | -0.14 | 7.31  | -2.34 |
| DKFZP481412 | 51313  | NM_001128424 | 15913 | -0.28 | 0.58  | -0.52 | 1.35  | 1.64  | 1.59  | -0.85 | -0.64 | -0.85 | -0.23 | 4.58  | -2.34 |
| MGC10820    | 84734  | NM_032648    | 15914 | 0.53  | 0.39  | -0.21 | 0.99  | 1.02  | 1.07  | -0.99 | -0.82 | -1.07 | -1.13 | 0.88  | -2.34 |
| SUFU        | 51844  | NM_016169    | 15915 | -0.93 | -1.50 | -1.51 | -0.12 | -0.20 | 0.83  | -0.01 | -1.10 | -1.23 | -3.84 | 0.51  | -2.34 |
| KIAA0828    | 23382  | NM_015328    | 15916 | -1.14 | -1.29 | -1.34 | 0.00  | 0.83  | 1.25  | -0.31 | -0.87 | -1.17 | -3.77 | 2.09  | -2.34 |
| CD311       | 1352   | NM_001075    | 15917 | -0.72 | -0.80 | -0.80 | 0.62  | 0.80  | 0.62  | -0.72 | -0.80 | -0.80 | -1.65 | 0.56  | -2.34 |
| ASCL2       | 430    | NM_005170    | 15918 | -0.76 | 0.23  | 0.02  | 2.06  | 0.79  | 2.79  | -1.07 | -0.74 | -0.84 | -0.51 | 5.64  | -2.34 |
| FRS2        | 36023  | NM_194314    | 15919 | -0.90 | -0.83 | -1.08 | -0.39 | 0.83  | 1.39  | -0.53 | -1.01 | -0.81 | -2.82 | 1.83  | -2.34 |
| FRS3        | 3389   | NM_002029    | 15920 | -1.01 | -0.81 | -1.08 | -0.19 | -0.64 | -0.80 | -0.64 | -0.80 | -0.80 | -1.95 | -0.39 | -2.34 |
| FLJ3766     | 348487 | NM_182623    | 15921 | -1.35 | -1.16 | -1.07 | -0.79 | 0.59  | 1.01  | -0.88 | -0.85 | -0.63 | -3.80 | -0.30 | -2.34 |
| FNF10       | 7556   | NM_015394    | 15922 | -0.64 | -0.37 | -0.68 | 1.01  | 1.70  | 0.39  | -0.77 | -0.78 | -0.79 | -1.69 | 3.09  | -2.35 |
| FGF17       | 8822   | NM_003867    | 15923 | -0.37 | -0.89 | -0.54 | 0.99  | 0.77  | 0.76  | -0.71 | -0.92 | -0.71 | -1.81 | 2.52  | -2.35 |
| MRPDI       | 470    | NM_002306    | 15924 | 0.87  | 0.74  | -0.74 | 1.47  | 1.39  | 1.62  | -0.59 | -0.83 | -0.72 | -2.35 | 4.21  | -2.35 |
| ORM2        | 5005   | NM_000608    | 15925 | 0.11  | -0.58 | 0.02  | 1.54  | 1.33  | 1.16  | -0.64 | -1.04 | -0.67 | -0.40 | -2.35 | -2.35 |
| NFKB1       | 4795   | NM_005007    | 15926 | -0.89 | -1.06 | -0.44 | -0.58 | 0.06  | 0.09  | -0.65 | -0.99 | -0.71 | -2.38 | -0.44 | -2.35 |
| LOC101918   | 4033   | NM_002037    | 15927 | -0.12 | 0.99  | -0.99 | -0.14 | -0.23 | 0.54  | -0.14 | -0.23 | 0.54  | -0.79 | 4.91  | -2.35 |
| DUG5        | 9231   | NM_004747    | 15928 | -0.76 | 0.90  | -1.77 | 0.44  | 1.43  | 1.85  | -0.83 | -0.06 | -1.58 | -1.63 | 3.73  | -2.35 |
| FLJ21579    | 144568 | NM_144670    | 15929 | -1.06 | -0.67 | -1.08 | -0.52 | -0.21 | -0.66 | -0.97 | -0.69 | -0.68 | -2.83 | -1.40 | -2.35 |
| LOC1014373  | 22119  | NM_021973    | 15930 | -0.86 | -1.03 | -0.80 | -0.37 | 0.40  | -0.78 | -0.70 | -0.80 | -0.70 | -2.49 | 0.12  | -2.35 |
| AMT         | 729    | NM_000481    | 15931 | 0.86  | 0.81  | -1.03 | 2.52  | 2.96  | 2.24  | -0.40 | -0.93 | -1.02 | -0.71 | 7.73  | -2.35 |
| MAN2C1      | 4123   | NM_006715    | 15932 | -0.49 | -0.08 | -0.51 | 0.83  | 1.51  | 0.97  | -0.77 | -0.76 | -0.82 | -1.08 | 3.31  | -2.35 |
| HYPE        | 11535  | NM_007076    | 15933 | -0.70 | -0.88 | 0.08  | -0.12 | 0.52  | 1.05  | -0.86 | -0.76 | -1.12 | -1.30 | 1.69  | -2.35 |
| FLJ2368     | 5082   | NM_001934    | 15934 | 0.33  | 0.03  | 0.09  | 0.49  | 0.87  | 0.69  | -0.45 | -0.87 | -0.69 | -1.97 | 2.97  | -2.35 |
| CAB         | 767    | NM_004056    | 15935 | -0.82 | -0.76 | -1.05 | -0.13 | 0.75  | 0.82  | -0.57 | -0.88 | -0.90 | -2.64 | 1.45  | -2.35 |
| GF1         | 2672   | NM_005263    | 15936 | -0.08 | -0.54 | 0.81  | 2.44  | 2.24  | 3.15  | -0.86 | -1.00 | -0.49 | -0.19 | 7.83  | -2.35 |
| 2358A6      | 23580  | NM_000811    | 15937 | -0.83 | -0.55 | -0.36 | 0.41  | 0.34  | 0.55  | -0.84 | -0.55 | -0.54 | -1.73 | 0.59  | -2.35 |
| KIAA0391    | 9692   | NM_014672    | 15938 | -0.89 | -0.97 | -0.68 | 1.01  | 1.09  | 0.33  | -1.04 | -0.98 | -0.33 | -2.54 | -2.35 | -2.35 |
| IF2         | 3608   | NM_004515    | 15939 | -0.87 | 2.09  | 0.33  | 2.62  | 4.61  | 2.42  | -0.77 | -0.76 | -0.83 | -3.30 | 9.65  | -2.35 |
| 2987        | 2987   | NM_011349    | 15940 | 0.80  | -0.24 | -0.49 | 1.95  | 1.84  | 1.97  | -0.84 | -0.77 | -0.88 | -1.63 | 5.86  | -2.35 |
| NIP         | 90527  | NM_144565    | 15941 | -0.92 | -0.73 | -0.02 | 0.20  | 0.35  | 1.00  | -0.68 | -0.89 | -0.79 | -1.57 | 1.54  | -2.35 |
| ITM2C       | 81618  | NM_01012514  | 15942 | -1.22 | -1.38 | -1.50 | -1.02 | -1.00 | -1.12 | -0.83 | -0.99 | -0.54 | -4.10 | -1.34 | -2.35 |
| MGC2744     | 80755  | NM_025267    | 15943 | -0.56 | -0.79 | -0.69 | -0.21 | 0.44  | 0.69  | -0.65 | -0.86 | -0.84 | -2.04 | 0.92  | -2.35 |
| LOC2541     | 84570  | NM_198721    | 15944 | 0.52  | -1.49 | -0.66 | 2.12  | 2.48  | 2.49  | -0.72 | -0.49 | -0.62 | -1.66 | 0.35  | -2.35 |
| SLC5A5      | 6528   | NM_000453    | 15945 | -1.27 | -1.07 | -1.73 | -0.84 | -0.81 | -0.88 | -0.72 | -0.58 | -1.06 | -0.47 | -2.53 | -2.35 |
| HRH3        | 11255  | NM_007232    | 15946 | -1.35 | -0.48 | -1.12 | 0.73  | 0.18  | 0.18  | -1.16 | -0.39 | -0.81 | -2.95 | 1.08  | -2.35 |
| MRB28       | 5513   | NM_019877    | 15947 | -0.92 | 0.11  | -0.84 | 1.53  | 1.62  | 1.81  | -0.53 | -0.62 | -1.62 | -1.63 | 3.80  | -2.35 |
| CB4         | 8535   | NM_003655    | 15948 | -0.33 | -1.10 | -0.82 | 0.11  | 0.17  | 0.75  | -0.49 | -0.99 | -0.87 | -2.25 | 1.03  |       |

|           |        |              |       |       |       |       |       |       |       |       |       |       |       |       |       |
|-----------|--------|--------------|-------|-------|-------|-------|-------|-------|-------|-------|-------|-------|-------|-------|-------|
| KMA1387   | 57223  | NM_020463    | 16031 | 0.03  | -0.47 | -0.88 | 0.76  | 0.98  | 2.99  | -0.27 | -0.81 | -1.31 | -1.31 | 4.73  | -2.39 |
| NBRF2     | 28992  | NM_010759    | 16032 | -0.85 | -0.91 | -1.48 | -0.44 | 2.75  | 1.60  | -0.33 | -1.89 | -1.10 | -1.10 | 3.26  | -2.38 |
| ZFPM1     | 16382  | NM_153813    | 16033 | 0.24  | -0.92 | -0.91 | 0.09  | 0.64  | 0.43  | 0.51  | -1.15 | -0.73 | -0.80 | 1.15  | -2.39 |
| MV048     | 140597 | NM_080390    | 16034 | -0.60 | -0.92 | -1.46 | 0.22  | 0.35  | -0.36 | -0.67 | -0.90 | -0.82 | -0.98 | 0.21  | -2.39 |
| CHIA      | 27159  | NM_021797    | 16035 | -0.40 | -0.40 | -0.87 | 1.37  | 1.05  | 1.00  | -0.84 | -0.67 | -0.86 | -1.67 | 3.48  | -2.39 |
| ADRE4     | 13     | NM_006884    | 16036 | 0.13  | 1.19  | -0.89 | 0.80  | 1.05  | 0.80  | 0.43  | -0.19 | -0.64 | -0.91 | 1.43  | -2.39 |
| FXK2      | 5980   | NM_134443    | 16037 | -0.60 | -0.98 | -1.23 | 0.29  | 0.22  | -0.12 | -0.50 | -0.93 | -0.97 | -2.81 | 0.38  | -2.40 |
| KCTD5     | 54442  | NM_018992    | 16038 | -0.70 | -1.12 | -0.68 | 0.78  | 0.74  | 0.02  | -0.80 | -0.98 | -0.61 | -2.49 | 1.54  | -2.40 |
| HMA1      | 316    | 060394       | 16039 | 0.14  | 0.70  | 1.37  | 1.64  | 0.43  | 0.70  | 0.42  | -0.19 | -0.42 | -1.19 | 1.71  | -2.40 |
| OKLFSF5   | 116173 | NM_00107288  | 16040 | -1.24 | -1.15 | -1.24 | 0.65  | 1.41  | 0.59  | -0.91 | -0.65 | -0.84 | -3.63 | 2.66  | -2.40 |
| CROT      | 54677  | NM_021151    | 16041 | -0.49 | -0.16 | -0.93 | 1.06  | 1.62  | 0.54  | -0.99 | -0.44 | -0.97 | -1.57 | 3.22  | -2.40 |
| TCFD1     | 697    | NM_010510    | 16042 | -0.80 | -0.60 | -1.26 | 0.75  | 1.26  | 0.90  | -0.84 | -0.67 | -0.86 | -1.11 | 3.31  | -2.40 |
| LYZL6     | 57151  | NM_020426    | 16043 | 1.43  | 1.60  | -0.89 | 0.38  | 0.28  | 1.52  | -0.37 | -1.03 | -1.00 | -0.91 | 2.18  | -2.40 |
| C120R8F14 | 58516  | NM_021238    | 16044 | -0.07 | -0.61 | -0.77 | 1.90  | 0.65  | 1.54  | -0.68 | -0.75 | -0.97 | -1.45 | 3.09  | -2.40 |
| ABCA2     | 20     | NM_212533    | 16045 | -0.48 | -0.17 | -0.23 | 1.60  | 1.58  | 0.99  | -0.89 | -0.74 | -0.77 | -0.87 | 4.13  | -2.40 |
| FLR0709   | 153132 | NM_175514    | 16046 | -0.52 | -0.75 | -0.98 | 0.30  | 0.10  | 0.17  | -0.72 | -0.85 | -0.83 | -2.25 | 0.57  | -2.40 |
| SLC26A10  | 65012  | NM_01018084  | 16047 | -0.67 | -0.83 | -0.93 | 0.07  | 0.50  | 1.40  | -0.64 | -0.86 | -0.91 | -2.43 | 1.97  | -2.40 |
| HECA      | 51696  | NM_016217    | 16048 | -0.93 | -0.62 | -0.94 | 0.19  | 0.10  | 0.17  | -0.91 | -0.62 | -0.88 | -2.49 | 0.46  | -2.40 |
| ACSL6     | 23205  | NM_015256    | 16049 | -0.29 | -0.43 | -0.76 | 1.35  | 1.29  | 0.93  | -0.56 | -0.83 | -1.03 | -1.48 | 3.56  | -2.40 |
| TEX15     | 56154  | NM_031271    | 16050 | 0.34  | -0.57 | -1.01 | 0.87  | 1.19  | 0.95  | -0.45 | -0.95 | -0.99 | -1.24 | 3.01  | -2.40 |
| DRM       | 27340  | NM_014503    | 16051 | -0.10 | -1.26 | -0.62 | 0.10  | 0.08  | 1.46  | -0.53 | -0.96 | -0.91 | -1.98 | 1.63  | -2.40 |
| ORND5     | 21983  | NM_00104708  | 16052 | -0.76 | -1.15 | -1.00 | -0.12 | -0.59 | -0.67 | -0.86 | -0.86 | -0.68 | -2.91 | -1.38 | -2.40 |
| TCBA1     | 154235 | NM_001040214 | 16053 | -0.67 | -1.00 | -0.54 | 0.51  | 0.74  | 0.18  | -0.93 | -1.09 | -0.39 | -2.21 | 1.43  | -2.40 |
| SPNK2     | 6691   | NM_021114    | 16054 | -0.63 | -0.68 | -0.42 | 0.59  | 0.07  | 0.21  | -0.92 | -0.76 | -0.72 | -1.73 | 0.87  | -2.40 |
| COPE      | 11516  | NM_199444    | 16055 | -0.17 | -0.93 | -0.97 | 0.62  | 0.85  | 0.94  | -0.75 | -0.88 | -0.78 | -2.07 | 1.81  | -2.40 |
| COGH      | 4987   | NM_001020941 | 16056 | -1.40 | -0.26 | -1.50 | 1.08  | 0.68  | 0.41  | -1.18 | -0.84 | -1.26 | -3.17 | 2.19  | -2.40 |
| CC119     | 6363   | NM_006274    | 16057 | -0.76 | -0.80 | -1.12 | -0.26 | 0.11  | 0.17  | -0.73 | -0.75 | -0.93 | -2.68 | 0.02  | -2.41 |
| MAN21     | 4125   | NM_000528    | 16058 | -1.04 | -0.39 | -0.51 | 0.64  | 0.95  | 1.04  | -1.01 | -0.65 | -0.74 | -1.94 | 2.64  | -2.41 |
| WDCB2     | 324    | NM_000568    | 16059 | -0.79 | -0.70 | -0.53 | 0.79  | 0.70  | 0.85  | -0.97 | -0.85 | -0.97 | -2.02 | 1.18  | -2.41 |
| WY074     | 57705  | NM_020945    | 16060 | -0.26 | -1.06 | -0.30 | 1.26  | 3.12  | 0.72  | -0.56 | -1.22 | -0.63 | -1.61 | 5.10  | -2.41 |
| ST14      | 6768   | NM_021978    | 16061 | -1.00 | -0.91 | -0.68 | 0.44  | 0.71  | 0.29  | -0.64 | -0.90 | -0.87 | -2.59 | 1.47  | -2.41 |
| KCTD20    | 22268  | NM_016262    | 16062 | -0.86 | -0.70 | -1.17 | 0.70  | -0.05 | -1.01 | -0.23 | -1.05 | -0.61 | -2.72 | 1.47  | -2.41 |
| CHFR      | 55743  | NM_018223    | 16063 | 2.95  | 1.09  | 1.82  | 0.02  | 7.97  | 9.10  | -0.73 | -0.90 | -0.78 | 5.86  | 25.09 | -2.41 |
| PCDH9A    | 56107  | NM_032089    | 16064 | -1.26 | -0.39 | -1.07 | 0.02  | -0.04 | 0.74  | -1.06 | -0.18 | -1.17 | -2.72 | 0.72  | -2.41 |
| FLJ0579   | 55177  | NM_018145    | 16065 | -0.74 | -0.52 | -0.01 | 1.45  | 1.69  | 1.23  | -0.91 | -0.71 | -0.80 | -1.27 | 4.37  | -2.41 |
| JARD1C    | 8342   | NM_004187    | 16066 | -0.40 | -1.22 | -1.37 | 0.12  | 0.87  | 0.72  | -1.02 | -0.77 | -0.72 | -1.99 | 16.83 | -2.41 |
| TGM7      | 116179 | NM_052955    | 16067 | -0.64 | -0.70 | -1.23 | 2.07  | 3.66  | 1.56  | -0.54 | -0.85 | -1.02 | -1.62 | 7.29  | -2.41 |
| TAR12     | 6883   | NM_005644    | 16068 | -1.38 | -1.11 | -1.23 | -0.76 | -0.06 | 0.76  | -0.91 | -0.79 | -0.70 | -3.73 | -1.60 | -2.41 |
| TRMTB19   | 1139   | NM_175499    | 16069 | 1.01  | 1.54  | 1.34  | 0.68  | 0.57  | 0.73  | 0.58  | 0.57  | 0.73  | 2.89  | 3.21  | -2.41 |
| FLTLG     | 2323   | NM_001459    | 16070 | 0.17  | -0.08 | -0.56 | 3.09  | 1.93  | 4.02  | -0.71 | -0.74 | -0.96 | -0.48 | 9.04  | -2.41 |
| TCF20     | 6942   | NM_181492    | 16071 | -0.67 | -1.02 | -0.68 | 0.56  | 1.45  | 0.17  | -0.78 | -1.02 | -0.61 | -2.36 | 2.17  | -2.41 |
| SOX11     | 9245   | NM_017537    | 16072 | -1.14 | -0.76 | -0.35 | -0.68 | 1.60  | 1.07  | -0.68 | -0.70 | -0.80 | -2.50 | 2.59  | -2.41 |
| PIGR      | 5294   | NM_002644    | 16073 | 0.53  | 0.54  | -0.22 | 0.40  | 0.94  | 1.40  | -0.86 | -0.79 | -0.76 | -1.29 | 2.74  | -2.41 |
| FLJ2903   | 64766  | NM_001017406 | 16074 | 1.22  | 0.09  | 0.41  | 3.82  | 2.36  | 3.37  | -0.67 | -0.92 | -0.83 | 1.72  | 9.55  | -2.42 |
| SUM04     | 387982 | NM_001020255 | 16075 | -0.64 | -0.20 | -0.41 | 2.58  | 1.70  | 1.34  | -1.02 | -0.43 | -0.97 | -1.24 | 5.62  | -2.42 |
| FLJ2035   | 5483   | NM_017076    | 16076 | 0.33  | -0.50 | -1.16 | 1.02  | 0.39  | 1.00  | -0.39 | -1.00 | -0.99 | -1.99 | 4.48  | -2.42 |
| C14ORF120 | 25983  | NM_932887    | 16077 | -0.80 | -1.42 | -0.78 | 1.24  | 2.95  | 1.70  | -0.51 | -1.12 | -0.79 | -3.00 | 6.07  | -2.42 |
| TTCL5     | 51132  | NM_016300    | 16078 | -0.10 | -0.16 | -0.34 | 2.27  | 1.28  | 1.10  | -0.96 | -0.68 | -0.78 | -0.61 | 4.65  | -2.42 |
| NF08P058  | 51607  | NM_009234    | 16079 | -0.52 | -0.96 | -0.52 | 0.60  | 0.62  | 0.52  | -0.62 | -0.52 | -0.62 | -2.40 | 0.66  | -2.42 |
| PIPTP     | 11122  | NM_007050    | 16080 | 0.08  | -0.43 | -0.20 | 2.64  | 4.80  | 3.90  | -0.72 | -0.89 | -0.81 | -0.55 | 13.34 | -2.42 |
| CCORF109  | 25844  | NM_015388    | 16081 | -1.26 | -1.34 | -1.32 | -0.90 | -0.55 | -0.81 | -0.74 | -0.96 | -0.72 | -3.92 | -2.25 | -2.42 |
| ASB16     | 12589  | NM_133492    | 16082 | -0.61 | -0.81 | -0.88 | -0.68 | -0.97 | -0.58 | -0.87 | -1.00 | -0.80 | -2.44 | 1.47  | -2.42 |
| PCP1      | 5831   | NM_153824    | 16083 | 0.55  | -0.56 | -0.21 | 0.77  | 1.26  | 1.39  | -0.77 | -0.55 | -0.71 | -1.32 | 4.22  | -2.42 |
| MTP       | 4547   | NM_000253    | 16084 | -0.14 | -0.64 | -0.38 | 1.09  | 0.56  | 0.61  | -0.69 | -0.93 | -0.81 | -1.16 | 2.27  | -2.42 |
| SDJ3      | 81570  | NM_030613    | 16085 | -0.11 | -0.96 | 0.26  | 0.07  | 0.12  | 1.98  | -0.32 | -1.30 | -1.01 | -0.81 | 2.17  | -2.42 |
| NALAD2    | 10002  | NM_005467    | 16086 | -0.38 | -0.53 | -0.81 | 0.61  | 0.61  | 0.61  | -0.71 | -0.60 | -0.52 | -1.72 | 2.34  | -2.42 |
| OR13G1    | 441933 | NM_001005487 | 16087 | -0.95 | -0.53 | -0.22 | 0.66  | 0.18  | 0.30  | -1.07 | -0.78 | -0.57 | -1.70 | 1.14  | -2.42 |
| CS1       | 1445   | NM_172210    | 16088 | 0.17  | 0.49  | 1.22  | 2.61  | 2.80  | 4.48  | -0.83 | -0.76 | -0.84 | -1.88 | 9.89  | -2.42 |
| CCORF12   | 8269   | NM_003492    | 16089 | -0.12 | -0.16 | -0.16 | 1.06  | 1.17  | 1.17  | 0.66  | 0.41  | 0.62  | 1.06  | 2.42  | -2.42 |
| CTBP2     | 1488   | NM_001329    | 16090 | 0.15  | -0.16 | 1.31  | 1.92  | 1.97  | 4.20  | -0.64 | -0.88 | -0.91 | -1.31 | 8.08  | -2.42 |
| LRP3      | 4037   | NM_002333    | 16091 | -0.72 | 0.11  | 0.00  | 1.81  | 2.11  | 3.64  | -0.81 | -0.52 | -1.09 | -0.60 | 7.56  | -2.42 |
| HRIE1     | 4844   | NM_003498    | 16092 | -0.91 | -0.71 | -0.55 | -0.18 | -0.36 | -0.75 | -0.84 | -0.76 | -0.75 | -2.67 | 0.64  | -2.42 |
| BARH1     | 5675   | NM_020064    | 16093 | -0.67 | -0.73 | -0.63 | 0.12  | -0.14 | 0.84  | -0.91 | -0.74 | -0.78 | -0.82 | 0.82  | -2.42 |
| KIAA0553  | 23131  | NM_001002909 | 16094 | -0.85 | -0.49 | -0.63 | 2.13  | 0.80  | 0.87  | -1.06 | -0.78 | -0.58 | -1.71 | 3.79  | -2.42 |
| KIA1584   | 84980  | NM_001039174 | 16095 | -0.05 | -0.45 | -0.57 | 2.58  | 2.01  | 1.29  | -0.76 | -0.78 | -0.85 | -1.38 | 5.87  | -2.42 |
| PRF10     | 27234  | NM_138313    | 16096 | -1.19 | -1.00 | -1.29 | 1.09  | 1.15  | 0.90  | -0.67 | -0.64 | -0.64 | -2.89 | 0.51  | -2.42 |
| COBP2     | 9276   | NM_004766    | 16097 | -1.34 | -1.84 | -1.72 | -0.82 | -3.08 | -2.54 | -0.80 | -0.89 | -0.74 | -4.89 | -4.43 | -2.42 |
| KIA1622   | 57718  | NM_020958    | 16098 | -1.04 | -1.13 | -0.30 | 1.46  | 2.64  | 2.50  | -0.67 | -0.91 | -0.85 | -2.47 | 6.61  | -2.42 |
| MC10P50   | 843    | NM_009954    | 16099 | -0.04 | -0.11 | -0.36 | 0.67  | 0.67  | 0.67  | -0.67 | -0.67 | -0.67 | -0.67 | 0.67  | -2.42 |
| ACSL1     | 2180   | NM_001995    | 16100 | -1.05 | 0.52  | -0.53 | 2.51  | 3.00  | 2.10  | -1.10 | -0.32 | -1.01 | -1.60 | 7.43  | -2.42 |
| RCY1      | 25898  | NM_00109922  | 16101 | -1.07 | -0.32 | -0.39 | 0.03  | 0.74  | 0.93  | -0.93 | -0.74 | -0.76 | -1.79 | 1.71  | -2.42 |
| NCR3B753  | 388753 | NM_00103285  | 16102 | 0.87  | 0.87  | 0.87  | 0.87  | 0.87  | 0.87  | 0.87  | 0.87  | 0.87  | 0.87  | 0.87  | -2.42 |
| NCE4      | 9888   | NM_014847    | 16103 | 0.93  | -1.39 | -0.80 | -1.12 | 0.10  | 0.73  | -0.62 | -0.91 | -0.90 | -1.11 | 0.43  | -2.42 |
| EPB42     | 2038   | NM_000119    | 16104 | -0.61 | -0.98 | -0.52 | 0.97  | 1.51  | 1.61  | -0.74 | -1.06 | -0.63 | -2.11 | 4.09  | -2.42 |
| VGF       | 7425   | NM_003778    | 16105 | -0.80 | -1.22 | -1.06 | -0.67 | 0.10  | 0.07  | -0.63 | -1.02 | -0.78 | -1.08 | -0.50 | -2.42 |
| NUP1      | 1312   | NM_016451    | 16106 | -1.68 | -1.77 | -1.10 | -2.67 | -2.09 | -1.62 | -0.87 | -1.02 | -0.99 | -5.56 | 7.84  | -2.42 |
| SLK10     | 11262  | NM_001005176 | 16107 | -0.92 | -0.74 | -0.49 | -0.06 | -0.23 | 0.34  | -0.80 | -1.00 | -0.63 | -2.15 | 0.64  | -2.42 |
| UFI1      | 8408   | NM_003565    | 16108 | -0.24 | -0.20 | -0.49 | 2.45  | 2.54  | 2.56  | -0.90 | -0.77 | -0.76 | -0.93 | 7.56  | -2.42 |
| IFP       | 5487   | NM_017853    | 16109 | -0.46 | -0.79 | -0.60 | 0.62  | 0.69  | 0.60  | -0.62 | -0.69 | -0.60 | -0.62 | 1.80  | -2.42 |
| SLC30A2   | 7780   | NM_032513    | 16110 | -0.13 | 0.26  | 0.07  | 1.84  | 2.94  | 3.18  | -0.75 | -0.87 | -0.82 | -2.00 |       |       |

|              |        |             |       |       |       |       |       |       |       |       |       |       |       |       |       |
|--------------|--------|-------------|-------|-------|-------|-------|-------|-------|-------|-------|-------|-------|-------|-------|-------|
| LOC90624     | 90624  | NM_181705   | 16193 | -0.05 | -0.35 | -0.68 | 2.05  | 1.49  | 1.08  | -0.83 | -0.83 | -0.81 | -0.98 | 4.62  | -2.47 |
| LOC90956     | 21862  | NM_0001867  | 16194 | -0.44 | 0.26  | 0.01  | 1.89  | 1.12  | 0.97  | -0.86 | -0.85 | -0.86 | -1.06 | 3.34  | -2.41 |
| RNC1         | 55544  | NM_183425   | 16195 | -1.26 | -0.40 | -0.58 | 1.17  | 1.21  | 1.09  | -0.98 | -0.92 | -0.56 | -2.23 | 3.46  | -2.47 |
| LOC339768    | 339768 | NM_194312   | 16196 | -1.06 | -0.90 | -0.80 | 0.23  | 0.14  | 1.64  | -0.83 | -0.79 | -0.85 | -2.76 | 2.01  | -2.47 |
| PTLH         | 5744   | NM_198966   | 16197 | -1.21 | -0.67 | -1.05 | 0.35  | 0.52  | 0.30  | -1.12 | -0.50 | -0.85 | -2.93 | 1.56  | -2.47 |
| LOC337443    | 337443 | NM_190186   | 16198 | -0.46 | 0.02  | -0.62 | 1.50  | 1.02  | 1.68  | -0.82 | -0.47 | -0.52 | -1.43 | 3.77  | -2.47 |
| CTRS         | 1486   | NM_004388   | 16199 | -0.65 | -0.22 | -0.91 | 1.57  | 1.22  | 1.69  | -0.92 | -0.65 | -0.90 | -1.82 | 4.48  | -2.47 |
| GLT1A1       | 2687   | NM_004121   | 16200 | -0.88 | -0.97 | -1.02 | 0.88  | 2.17  | 1.68  | -0.85 | -0.75 | -0.88 | -2.87 | 4.73  | -2.47 |
| FABP3        | 217    | NM_003045   | 16201 | -0.53 | -0.61 | -0.61 | 1.17  | 1.30  | 1.61  | -0.81 | -0.73 | -0.81 | -1.17 | 3.98  | -2.47 |
| CHC106       | 84303  | NM_032343   | 16202 | -0.98 | -0.86 | -0.65 | 0.06  | -0.09 | -0.09 | -0.96 | -0.75 | -0.76 | -2.49 | 4.11  | -2.48 |
| CDR04        | 56550  | NM_00104200 | 16203 | -0.55 | -0.68 | 0.26  | 0.50  | 1.39  | 1.42  | -0.95 | -0.99 | -0.54 | -0.97 | 3.31  | -2.48 |
| HA1A13011857 | 8448   | NM_0011857  | 16204 | -1.21 | -1.43 | -0.76 | 0.76  | 1.01  | 1.42  | -1.13 | -1.43 | -0.76 | -4.60 | -0.30 | -2.48 |
| NDUF17       | 4729   | NM_021074   | 16205 | -0.99 | -0.77 | -1.14 | -0.14 | 0.22  | 0.34  | -0.79 | -0.69 | -0.99 | -2.90 | 0.41  | -2.48 |
| TRPM8        | 79054  | NM_024080   | 16206 | -1.30 | -1.16 | -0.96 | 0.35  | 0.87  | 0.50  | -0.85 | -0.87 | -0.76 | -3.42 | 1.72  | -2.48 |
| IFS          | 3578   | NM_000590   | 16207 | -0.72 | -1.09 | -0.63 | 1.27  | 1.03  | 0.93  | -0.85 | -1.12 | -0.50 | -2.44 | 1.97  | -2.48 |
| KCNZ         | 4      | NM_001095   | 16208 | -0.84 | -1.16 | -1.11 | 0.38  | 0.21  | 0.68  | -0.91 | -1.04 | -0.51 | -1.86 | 1.27  | -2.48 |
| DGCR6L       | 85359  | NM_033257   | 16209 | -1.03 | -1.16 | -0.87 | 1.33  | 1.10  | 1.46  | -0.75 | -0.82 | -0.91 | -3.06 | 3.89  | -2.48 |
| GUA3         | 8001   | NM_006529   | 16210 | -0.96 | -0.85 | -0.96 | -0.02 | -0.09 | 0.41  | -0.78 | -0.81 | -0.90 | -2.76 | 3.30  | -2.48 |
| MSA2         | 2286   | NM_000139   | 16211 | -1.24 | -0.92 | -1.07 | -0.71 | -0.22 | -0.37 | -0.81 | -0.71 | -0.96 | -3.23 | 1.10  | -2.48 |
| DKFZP434C184 | 399474 | NM_00100382 | 16212 | -1.20 | -1.02 | -0.62 | 1.09  | 0.75  | 1.31  | -0.95 | -0.95 | -0.58 | -2.84 | 2.24  | -2.48 |
| KMAA446      | 9673   | NM_00113572 | 16213 | -0.91 | -0.79 | -0.87 | 0.27  | 0.27  | 0.79  | -0.77 | -0.76 | -0.96 | -2.57 | 1.33  | -2.48 |
| THM1         | 7076   | NM_002254   | 16214 | -0.80 | -0.62 | -0.54 | 0.48  | 0.83  | 0.62  | -0.84 | -0.90 | -0.74 | -2.07 | 1.93  | -2.48 |
| JUB          | 84942  | NM_198986   | 16215 | -0.61 | -1.17 | -1.08 | 0.15  | 0.55  | 0.57  | -0.54 | -1.08 | -0.86 | -2.86 | 1.27  | -2.48 |
| FLJ36870     | 283349 | NM_173658   | 16216 | -0.74 | -1.14 | -1.07 | 0.36  | -0.56 | 0.23  | -0.75 | -0.89 | -0.85 | -2.95 | 0.04  | -2.48 |
| CDR025       | 27248  | NM_015702   | 16217 | -0.34 | -0.10 | -0.29 | 1.56  | 1.41  | 0.74  | -0.90 | -0.73 | -0.85 | -0.73 | 3.70  | -2.48 |
| LOC          | 402    | NM_006511   | 16218 | -0.77 | -0.67 | -0.55 | 0.51  | 1.37  | 0.80  | -0.63 | -1.02 | -0.84 | -1.99 | 2.77  | -2.48 |
| RNF141       | 50862  | NM_016422   | 16219 | -1.25 | -0.75 | -1.50 | -0.19 | 0.00  | 0.47  | -0.96 | -0.28 | -1.25 | -3.51 | 0.28  | -2.48 |
| CD8B1        | 926    | NM_172102   | 16220 | -0.97 | 0.81  | -0.45 | 1.67  | 1.61  | 1.64  | -1.05 | -0.71 | -0.72 | -0.61 | 4.91  | -2.48 |
| DNM10        | 19636  | NM_021617   | 16221 | -0.74 | -0.52 | -0.89 | 0.42  | 0.45  | 0.62  | -0.62 | -0.45 | -0.52 | -2.15 | 2.36  | -2.48 |
| CDR023       | 138716 | NM_148178   | 16222 | -0.54 | -1.03 | -1.33 | -0.29 | -0.50 | -0.51 | -0.50 | -1.13 | -0.86 | -2.91 | -1.31 | -2.48 |
| CDR2P2       | 10421  | NM_006110   | 16223 | -0.42 | -0.81 | -0.54 | 1.20  | 0.01  | 1.67  | -0.91 | -0.62 | -0.95 | -1.78 | 2.88  | -2.48 |
| GRK4         | 2590   | NM_021619   | 16224 | -1.01 | -0.05 | -0.42 | 1.26  | 0.01  | 1.67  | -0.91 | -0.62 | -0.95 | -1.48 | 2.69  | -2.48 |
| MSL          | 55690  | NM_018026   | 16225 | -0.71 | -0.28 | -0.74 | 1.89  | 1.52  | 2.02  | -0.84 | -0.98 | -0.56 | -1.73 | 5.43  | -2.49 |
| CXK1         | 8933   | NM_00107871 | 16226 | -1.19 | -1.06 | -0.54 | 2.28  | 2.21  | 1.25  | -0.82 | -1.20 | -0.46 | -2.79 | 5.74  | -2.49 |
| MGE96        | 158809 | NM_175253   | 16227 | -0.88 | -0.78 | -0.99 | 0.94  | 2.31  | 1.36  | -0.80 | -0.87 | -0.81 | -2.65 | 4.61  | -2.49 |
| FLJ32658     | 147072 | NM_144688   | 16228 | -0.82 | -0.70 | -0.30 | 1.04  | 0.93  | 0.82  | -0.82 | -0.82 | -0.82 | -2.65 | 4.61  | -2.49 |
| OXK1         | 341567 | NM_181788   | 16229 | -1.02 | 0.36  | -0.24 | 2.57  | 0.90  | 1.44  | -1.02 | -0.43 | -1.03 | 0.00  | 4.91  | -2.49 |
| MGEB96       | 158809 | NM_175253   | 16227 | -0.88 | -0.78 | -0.99 | 0.94  | 2.31  | 1.36  | -0.80 | -0.87 | -0.81 | -2.65 | 4.61  | -2.49 |
| SA2          | 638    | NM_001754   | 16230 | -0.67 | -1.19 | -0.52 | 0.31  | -0.27 | 0.25  | -0.71 | -1.06 | -0.71 | -2.38 | 0.29  | -2.49 |
| SOFTD1       | 25928  | NM_015464   | 16232 | -1.07 | -1.04 | 1.14  | 0.81  | 1.75  | 2.20  | -0.94 | -1.04 | -0.51 | -0.98 | 4.76  | -2.49 |
| PP35         | 11062  | NM_181581   | 16233 | -1.13 | -0.69 | -0.79 | 0.09  | 1.37  | 1.02  | -0.94 | -0.73 | -0.82 | -2.61 | 2.47  | -2.49 |
| RH4D5        | 7983   | NM_000373   | 16234 | -1.10 | -1.27 | -0.73 | 0.22  | 0.12  | 0.22  | -1.12 | -1.27 | -0.73 | -3.01 | 1.09  | -2.49 |
| POE3B        | 5140   | NM_000922   | 16235 | -1.32 | -1.22 | -0.66 | 0.18  | -0.38 | 0.78  | -1.11 | -1.05 | -0.33 | -3.10 | 0.98  | -2.49 |
| CBX5         | 23468  | NM_012117   | 16236 | 0.78  | 0.05  | -0.66 | 1.49  | 2.81  | 2.75  | -0.33 | -0.99 | -1.16 | 0.17  | 7.05  | -2.49 |
| BC1T         | 386    | NM_005004   | 16237 | -1.00 | -1.09 | -1.03 | 1.13  | 1.03  | 0.45  | -0.66 | -0.89 | -0.93 | -3.11 | 2.61  | -2.49 |
| LOC20134     | 202134 | NM_00107929 | 16238 | -1.07 | -0.65 | -0.53 | 0.66  | -1.02 | -0.83 | -0.65 | -0.65 | -0.53 | -2.52 | 2.78  | -2.49 |
| SERPINE1     | 5054   | NM_000602   | 16239 | 0.37  | -0.44 | -0.39 | 1.65  | 2.39  | 2.36  | -0.65 | -0.82 | -1.02 | -0.46 | 6.39  | -2.49 |
| ADAMTS10     | 140766 | NM_080722   | 16240 | -0.61 | -1.11 | -0.41 | 0.69  | 1.91  | 2.45  | -0.40 | -1.08 | -1.01 | -1.93 | 5.05  | -2.49 |
| RARL4        | 1102   | NM_000860   | 16241 | -0.76 | -1.19 | -0.44 | 1.12  | 0.83  | 0.62  | -0.74 | -1.19 | -0.44 | -1.14 | 1.29  | -2.49 |
| MEFV         | 4210   | NM_000243   | 16242 | -0.86 | -1.07 | 1.17  | 12.87 | 7.76  | 9.77  | -1.20 | -0.67 | -0.62 | -1.38 | 30.40 | -2.49 |
| ANKA10       | 11399  | NM_007193   | 16243 | -1.06 | -0.61 | -0.69 | 0.70  | 1.87  | 0.68  | -0.94 | -0.88 | -0.67 | -2.36 | 3.25  | -2.49 |
| FLJ25143     | 23883  | NM_000500   | 16244 | -0.21 | -0.92 | -0.47 | 1.15  | 1.00  | 0.92  | -0.56 | -0.47 | -0.56 | -1.60 | 4.13  | -2.49 |
| GNA2         | 2771   | NM_002070   | 16245 | -0.57 | 0.75  | 0.52  | 2.66  | 2.39  | 1.54  | -1.16 | -0.62 | -0.73 | -1.70 | 6.10  | -2.49 |
| MGC4825      | 79135  | NM_024122   | 16246 | -0.90 | -0.61 | -0.50 | 0.47  | 1.26  | 0.50  | -1.01 | -0.91 | -0.57 | -2.01 | 2.23  | -2.49 |
| CPY2F1       | 1572   | NM_000774   | 16247 | -0.99 | -1.20 | -0.94 | 0.23  | -0.45 | -0.15 | -1.04 | -0.88 | -0.58 | -3.14 | -0.38 | -2.49 |
| MAO          | 2349   | NM_012205   | 16248 | -0.87 | -0.25 | -0.48 | 0.97  | 0.57  | 1.12  | -0.62 | -0.46 | -0.16 | -2.58 | 0.80  | -2.49 |
| OR2Y1        | 134083 | NM_00100167 | 16249 | -0.68 | 0.00  | -0.79 | 1.36  | 0.66  | 1.29  | -1.10 | -0.47 | -0.92 | -1.47 | 3.31  | -2.49 |
| PP2C2        | 33926  | NM_005167   | 16250 | -1.15 | -0.96 | -1.22 | 3.59  | 5.72  | 4.20  | -0.55 | -0.78 | -1.16 | -3.33 | 13.51 | -2.50 |
| LOC204650    | 347169 | NM_0004650  | 16251 | -0.99 | -1.12 | -0.36 | 0.67  | 1.05  | 0.67  | -0.66 | -0.66 | -0.66 | -1.47 | 1.63  | -2.50 |
| ZNF1         | 27000  | NM_014377   | 16252 | -0.29 | -0.32 | 1.11  | 1.99  | 2.07  | 2.90  | -0.85 | -0.90 | -0.75 | -0.50 | 6.96  | -2.50 |
| KIFC         | 90996  | NM_145754   | 16253 | -0.21 | -0.67 | 0.19  | 1.58  | 2.19  | 3.19  | -0.57 | -0.97 | -0.95 | -0.28 | 6.96  | -2.50 |
| AMP2A        | 379    | NM_000699   | 16254 | -0.85 | -0.49 | -0.58 | 0.79  | 0.83  | 1.00  | -0.84 | -0.79 | -0.83 | -1.82 | 2.83  | -2.50 |
| KIA0091      | 29305  | NM_015000   | 16255 | -0.69 | -0.41 | -0.35 | 3.51  | 3.57  | 2.95  | -0.73 | -1.00 | -0.76 | -1.45 | 10.03 | -2.50 |
| ZNF259       | 8882   | NM_003904   | 16256 | -0.72 | -0.71 | -0.50 | 0.46  | 0.40  | 0.61  | -0.78 | -0.82 | -0.89 | -1.93 | 1.47  | -2.50 |
| EF1A1L8      | 54566  | NM_018424   | 16257 | -0.64 | -0.21 | -1.01 | 2.07  | 0.75  | 1.09  | -0.97 | -0.56 | -0.97 | -1.86 | 3.88  | -2.50 |
| SC           | 2342   | NM_001125   | 16258 | -0.63 | -0.94 | -0.25 | 0.97  | 0.84  | 0.41  | -0.64 | -0.64 | -0.64 | -2.31 | 1.65  | -2.50 |
| PPAP2A       | 8611   | NM_003711   | 16259 | -0.60 | -0.85 | -0.72 | 2.10  | 1.14  | 1.07  | -0.92 | -0.82 | -0.76 | -2.17 | 4.31  | -2.50 |
| SLC9A4       | 389015 | NM_00101552 | 16260 | -0.97 | -0.20 | -1.32 | 0.01  | 0.68  | 0.85  | -0.77 | -0.44 | -1.29 | -2.50 | 1.54  | -2.50 |
| HXB3         | 3074   | NM_003621   | 16261 | -0.46 | -0.79 | -1.07 | 1.40  | 1.09  | 0.94  | -1.12 | -1.09 | -0.94 | -2.32 | 2.15  | -2.50 |
| HSPC171      | 29100  | NM_014187   | 16262 | -1.10 | 0.01  | -0.31 | 2.00  | 1.56  | 2.51  | -0.57 | -0.82 | -1.11 | -0.70 | 6.07  | -2.50 |
| LOC21970     | 84134  | NM_032174   | 16263 | -0.59 | -0.75 | -0.07 | 0.51  | 0.33  | 1.16  | -0.82 | -0.87 | -0.81 | -1.41 | 2.00  | -2.50 |
| LOC2137      | 6167   | NM_000364   | 16264 | -0.33 | -1.06 | -0.24 | 0.88  | 1.67  | 1.39  | -0.87 | -1.07 | -0.87 | -1.60 | 3.52  | -2.50 |
| ZNF833       | 10909  | NM_006777   | 16265 | -0.88 | -0.31 | -1.12 | 1.85  | 2.02  | 0.79  | -1.03 | -0.78 | -0.69 | -1.01 | 4.67  | -2.50 |
| GAS2         | 2620   | NM_005256   | 16266 | -0.34 | -0.23 | 0.52  | 1.12  | 1.83  | 1.33  | -0.89 | -1.08 | -0.54 | -0.40 | 4.28  | -2.50 |
| LOC191       | 91694  | NM_152271   | 16267 | -0.94 | -0.45 | -0.85 | 0.91  | 1.04  | 0.20  | -0.98 | -0.82 | -0.70 | -2.25 | 1.75  | -2.50 |
| RIF4         | 3662   | NM_000460   | 16268 | -1.12 | -1.19 | -1.20 | 0.40  | 0.14  | 0.20  | -1.12 | -1.19 | -1.20 | -3.52 | 1.15  | -2.50 |
| ORA212       | 346525 | NM_00104435 | 16269 | -1.23 | -0.81 | -0.74 | 0.61  | 0.30  | 1.16  | -0.64 | -0.84 | -1.03 | -2.79 | 2.07  | -2.51 |
| ACVRL1       | 94     | NM_000020   | 16270 | -1.00 | -0.85 | -1.08 | 0.90  | -0.01 | 0.20  | -1.01 | -0.67 | -0.82 | -2.94 | 1.10  | -2.51 |
| FOXP         | 232    | NM_000417   | 16271 | -1.85 | -1.06 | -1.06 | 1.68  | 1.58  | 1.68  | -0.58 | -1.29 | -0.64 | -1.46 | 3.34  | -2.51 |
| FLJ5286      | 153443 | NM_152546   | 16272 | -0.47 | -0.75 | -0.23 | 0.90  | 1.20  | 2.25  | -0.74 | -     |       |       |       |       |

|            |        |              |       |       |       |       |       |       |       |       |       |       |       |       |       |
|------------|--------|--------------|-------|-------|-------|-------|-------|-------|-------|-------|-------|-------|-------|-------|-------|
| C109F32    | 92840  | NM_138993    | 16355 | -1.40 | -1.30 | -1.42 | -0.68 | -0.74 | -0.01 | -0.72 | -0.98 | -0.85 | -4.11 | -1.43 | -2.55 |
| MCS508     | 78979  | NM_001223    | 16356 | -0.74 | -0.28 | -0.00 | 0.21  | 0.61  | 1.90  | 0.71  | 1.72  | 0.62  | -1.74 | -0.63 | -1.52 |
| KAA0355    | 9710   | NM_014686    | 16357 | 0.91  | 1.21  | 0.83  | -0.61 | -0.40 | 0.36  | -0.63 | -1.03 | -0.89 | -2.95 | -0.66 | -2.55 |
| TRP1       | 7442   | NM_018727    | 16358 | -0.27 | -0.82 | -1.02 | 1.25  | 1.90  | 2.06  | -0.65 | -0.94 | -0.97 | -2.11 | 5.21  | -2.55 |
| FLU1795    | 124088 | NM_001099225 | 16359 | -0.15 | 0.56  | 0.51  | 3.48  | 2.32  | 2.52  | -1.27 | -0.45 | -0.82 | 0.91  | 8.22  | -2.55 |
| TCR3       | 3689   | NM_003612    | 16360 | 1.20  | 1.40  | 1.20  | -0.12 | -0.92 | -0.62 | -0.78 | -0.66 | -0.77 | 0.91  | 3.75  | -2.55 |
| C140RF131  | 55778  | NM_018335    | 16361 | -0.74 | -0.87 | -0.90 | 0.24  | 0.48  | 0.61  | -0.52 | -0.89 | -1.15 | -2.50 | 1.33  | -2.55 |
| ANGP16     | 83854  | NM_031917    | 16362 | -0.49 | -1.05 | -0.68 | 0.71  | 0.78  | 1.22  | -0.78 | -0.89 | -0.88 | -2.22 | 2.71  | -2.55 |
| FLU2031    | 55633  | NM_018768    | 16363 | -0.25 | 0.84  | 0.60  | 0.52  | 1.05  | 0.95  | -0.52 | 0.95  | -0.45 | -0.54 | 4.20  | -2.55 |
| GARS       | 2617   | NM_020247    | 16364 | -1.05 | -1.19 | -0.79 | 2.81  | 2.47  | 2.66  | -1.29 | -0.93 | -0.33 | -1.04 | 7.94  | -2.55 |
| GR6        | 23434  | NM_007154    | 16365 | -0.17 | 0.01  | -0.36 | 2.30  | 1.89  | 3.43  | -0.72 | -0.81 | -1.03 | -0.52 | 7.62  | -2.55 |
| MCG2997    | 23237  | NM_003597    | 16366 | -1.35 | -0.99 | -0.99 | -0.62 | -0.99 | -0.62 | -0.99 | -0.62 | -0.99 | -1.40 | 1.01  | -2.55 |
| SPRN       | 92170  | NM_138384    | 16367 | -0.25 | 0.78  | -0.57 | 0.28  | 1.80  | 1.75  | 0.55  | -1.10 | -0.90 | -1.60 | 3.83  | -2.55 |
| TMIM178    | 10245  | NM_005834    | 16368 | -0.77 | -1.37 | -1.04 | -0.98 | -0.72 | 1.44  | -0.34 | -1.04 | -1.17 | -3.18 | -2.66 | -2.56 |
| ACBP       | 84519  | NM_012489    | 16369 | -1.05 | -1.49 | -0.80 | 0.54  | 0.79  | 0.13  | -1.10 | -0.78 | -0.68 | -2.34 | 1.48  | -2.56 |
| PR3L       | 6112   | NM_005061    | 16370 | -0.47 | -0.50 | -0.81 | 1.17  | 1.16  | 0.89  | -0.83 | -0.90 | -0.81 | -1.79 | 3.21  | -2.56 |
| ACVR2      | 92     | NM_001616    | 16371 | 0.53  | 0.15  | -0.34 | 1.31  | 2.89  | 4.42  | -0.60 | -0.85 | -1.10 | 0.35  | 8.63  | -2.56 |
| HAPLN1     | 1404   | NM_001884    | 16372 | -1.05 | -1.31 | -0.83 | -0.13 | -0.29 | -0.11 | -0.89 | -0.92 | -0.74 | -3.39 | -0.52 | -2.56 |
| ERS        | 51278  | NM_010545    | 16373 | -0.44 | -0.47 | -1.53 | 0.68  | 0.70  | 1.28  | -0.58 | -0.69 | -1.28 | -2.24 | 2.66  | -2.56 |
| NW5        | 55998  | NM_023946    | 16374 | -0.65 | -1.36 | -0.88 | 0.00  | 0.01  | 0.25  | -0.67 | -1.06 | -0.83 | -2.89 | 2.26  | -2.56 |
| KMA1026    | 23254  | NM_001018001 | 16375 | -0.68 | -0.72 | -0.55 | 1.43  | 1.01  | 0.06  | -0.98 | -0.87 | -0.71 | -1.95 | 2.50  | -2.56 |
| KAA0292    | 9702   | NM_014979    | 16376 | -1.09 | -0.49 | -0.73 | 0.81  | 1.33  | 0.11  | -1.09 | -0.86 | -0.60 | -2.30 | 2.25  | -2.56 |
| AGRN       | 375790 | NM_198576    | 16377 | -1.02 | 0.83  | -0.99 | 0.62  | 0.18  | -0.39 | -1.14 | -0.83 | -0.59 | -2.84 | 0.41  | -2.56 |
| STXP2      | 6813   | NM_006949    | 16378 | -1.11 | -0.91 | -0.64 | -0.51 | 0.01  | 0.19  | -1.02 | -0.86 | -0.67 | -2.67 | -0.31 | -2.56 |
| FLU3084    | 149483 | NM_00114938  | 16379 | -0.40 | -0.91 | -0.91 | 1.49  | 1.07  | 0.74  | -0.71 | -0.92 | -0.93 | -1.88 | 3.30  | -2.56 |
| GR124      | 25960  | NM_022777    | 16380 | -0.29 | 0.44  | -0.13 | 2.51  | 1.43  | 2.71  | -0.88 | -0.91 | -0.77 | -0.86 | 6.65  | -2.56 |
| ORSL21     | 138751 | NM_001005173 | 16381 | -0.05 | -0.42 | -0.35 | 2.80  | 2.79  | 2.21  | -0.91 | -0.79 | -0.86 | -0.82 | 7.80  | -2.56 |
| CON1       | 57018  | NM_020707    | 16382 | -0.93 | -1.13 | -0.52 | 0.65  | 0.67  | 0.32  | -1.10 | -1.07 | -0.38 | -2.57 | 1.64  | -2.56 |
| LOC40057   | 440057 | NM_001243767 | 16383 | -0.85 | -0.83 | -1.00 | -0.89 | -0.88 | -1.00 | -0.89 | -0.88 | -1.00 | -0.89 | -0.88 | -1.00 |
| KAA0971    | 228688 | NM_014929    | 16384 | -0.91 | -1.10 | -0.73 | -0.11 | -0.85 | -0.39 | -1.00 | -0.87 | -0.69 | -2.75 | -1.34 | -2.56 |
| TNRF514    | 8764   | NM_003820    | 16385 | 0.13  | 0.39  | -0.21 | 2.43  | 2.60  | 2.95  | -0.74 | -1.05 | -1.00 | 3.00  | 7.99  | -2.56 |
| LSA1       | 653    | NM_003843    | 16386 | -1.06 | -1.07 | -1.01 | -0.56 | -0.56 | -1.00 | -0.60 | -0.59 | -1.00 | -1.06 | 2.72  | -2.56 |
| PE01       | 56652  | NM_021830    | 16387 | -0.55 | 0.22  | -0.59 | 2.56  | 1.15  | 1.07  | -0.94 | -0.66 | -0.96 | -1.20 | 4.78  | -2.56 |
| FLU4021    | 284355 | NM_198479    | 16388 | -1.02 | -0.75 | -1.18 | -1.15 | -0.22 | 0.79  | -0.83 | -0.80 | -0.93 | -2.95 | 0.43  | -2.56 |
| CSK31      | 1524   | NM_001337    | 16389 | -0.70 | -0.51 | -0.69 | -1.59 | 0.69  | 0.91  | -1.00 | -0.84 | -0.72 | -1.91 | 3.19  | -2.56 |
| ST14       | 6789   | NM_002382    | 16390 | -0.28 | 0.13  | -0.75 | 1.74  | 2.24  | 0.74  | -0.98 | -0.67 | -0.74 | -1.56 | 1.74  | -2.56 |
| GMB2       | 2783   | NM_005273    | 16391 | -1.01 | -1.47 | -1.74 | -1.28 | -0.92 | -0.83 | -1.18 | -1.13 | -1.25 | -4.22 | -3.03 | -2.56 |
| HDXD8      | 3234   | NM_019558    | 16392 | -0.96 | -0.55 | -1.22 | 0.63  | 0.24  | 0.06  | -0.91 | -0.68 | -0.96 | -2.73 | 0.94  | -2.56 |
| LOC40059   | 63345  | NM_001040084 | 16393 | -0.96 | -0.63 | -0.96 | -0.98 | -0.76 | -0.96 | -0.98 | -0.76 | -0.96 | -2.21 | 3.80  | -2.56 |
| PHL043     | 23612  | NM_021396    | 16394 | -0.34 | -0.57 | -1.04 | 0.66  | 0.34  | 0.18  | -0.64 | -0.87 | -1.06 | -1.96 | 1.18  | -2.56 |
| PIA2       | 9867   | NM_014819    | 16395 | 1.90  | 0.63  | 2.72  | 16.01 | 14.16 | 13.98 | 0.94  | -0.98 | -0.64 | 5.25  | 44.15 | -2.56 |
| BA1640     | 8480   | NM_001816    | 16396 | 0.22  | 0.47  | -0.21 | 3.23  | 4.27  | 0.69  | -0.82 | -0.73 | -1.03 | -0.40 | 5.98  | -2.56 |
| RFSKCL1    | 26790  | NM_012424    | 16397 | -0.64 | -0.79 | -1.02 | 0.14  | 0.27  | -0.12 | -0.73 | -1.00 | -0.84 | -2.45 | 0.29  | -2.56 |
| MAP1L3A    | 84557  | NM_181509    | 16398 | -0.49 | -0.68 | -0.94 | 0.25  | 0.67  | 0.71  | -0.64 | -0.94 | -0.99 | -2.12 | 1.63  | -2.56 |
| C140RF3    | 79622  | NM_024571    | 16399 | -0.95 | -1.29 | -1.37 | 0.02  | -0.52 | -0.23 | -0.69 | -0.91 | -0.96 | -3.61 | -0.73 | -2.56 |
| MCC307     | 8425   | NM_003840    | 16400 | -0.38 | 0.28  | -0.86 | 0.85  | 0.85  | 0.85  | -0.38 | -0.28 | -0.86 | 0.85  | 0.85  | 0.85  |
| POLR3G     | 10622  | NM_006467    | 16401 | -0.19 | -0.63 | -0.42 | 2.07  | 1.25  | 1.50  | -0.70 | -0.71 | -1.16 | -0.86 | 4.82  | -2.57 |
| MCG55      | 79078  | NM_024097    | 16402 | -1.26 | -1.43 | -0.93 | -0.41 | 0.32  | 1.02  | -0.67 | -0.95 | -0.94 | -3.62 | 0.92  | -2.57 |
| ORSL11     | 9894   | NM_004024    | 16403 | -0.64 | -0.04 | -0.25 | 0.59  | 0.59  | 0.59  | -0.64 | -0.04 | -0.25 | 0.59  | 0.59  | 0.59  |
| TRPM7      | 54822  | NM_017672    | 16404 | -0.69 | -0.42 | -1.18 | 1.05  | 1.10  | 1.00  | -0.89 | -0.69 | -0.99 | -2.29 | 3.05  | -2.57 |
| DUSP2      | 56940  | NM_002185    | 16405 | -0.75 | -1.05 | -1.32 | 0.20  | 0.58  | 0.44  | -0.64 | -0.88 | -1.05 | -3.15 | 1.22  | -2.57 |
| ENF405     | 7889   | NM_001835    | 16406 | -0.62 | -0.62 | -0.70 | -0.62 | -0.62 | -0.70 | -0.62 | -0.62 | -0.70 | -0.62 | -0.62 | -0.70 |
| CTDRF2B8   | 221960 | NM_198997    | 16407 | 0.73  | 0.70  | -0.59 | 1.00  | 0.19  | 1.33  | -0.89 | -0.73 | -0.94 | -2.52 | 2.57  | -2.57 |
| MEF2C      | 4208   | NM_002397    | 16408 | -0.99 | -0.51 | -1.05 | 0.14  | 0.76  | 1.05  | -0.83 | -0.66 | -1.08 | -2.55 | 1.95  | -2.57 |
| EPOR       | 2057   | NM_000121    | 16409 | -0.61 | -0.89 | -1.15 | 0.80  | 1.67  | 1.13  | -0.86 | -1.16 | -1.55 | -1.66 | 3.80  | -2.57 |
| HLR2B      | 11159  | NM_007081    | 16410 | -0.72 | -1.11 | -1.46 | -0.71 | -0.60 | -0.87 | -1.11 | -1.02 | -0.87 | -3.28 | 0.93  | -2.57 |
| IKK3       | 79191  | NM_024136    | 16411 | -0.18 | -0.69 | -0.72 | 0.78  | 1.21  | 1.14  | -0.62 | -0.91 | -1.04 | -1.58 | 3.12  | -2.57 |
| STAR5      | 80705  | NM_030774    | 16412 | -0.63 | -0.54 | -0.48 | 0.71  | 2.17  | 1.19  | -0.79 | -1.00 | -0.78 | -1.65 | 4.27  | -2.57 |
| ST11029    | 5577   | NM_001304    | 16413 | -0.28 | -0.49 | -1.07 | 1.18  | 1.20  | 1.13  | -0.82 | -1.10 | -1.46 | -1.96 | 2.15  | -2.57 |
| CD209      | 30835  | NM_001155    | 16414 | -0.86 | -0.91 | -0.74 | 0.77  | 3.35  | 0.93  | -1.02 | -1.22 | -0.34 | -2.51 | 5.04  | -2.57 |
| FLU2955    | 164781 | NM_178821    | 16415 | -0.67 | -0.16 | -0.66 | 2.11  | 1.87  | 1.87  | -1.11 | -0.55 | -0.91 | -1.50 | 5.85  | -2.57 |
| GAGE3      | 9580   | NM_020777    | 16416 | -1.22 | -0.83 | -1.16 | -0.89 | -1.16 | -0.89 | -1.16 | -0.89 | -1.16 | -3.36 | 1.07  | -2.57 |
| MAP1L3C    | 440738 | NM_00104343  | 16417 | -0.41 | -0.95 | -0.82 | -0.01 | 0.82  | 1.56  | -0.55 | -0.95 | -1.07 | -2.19 | 2.37  | -2.57 |
| CD3        | 963    | NM_000560    | 16418 | -0.21 | -0.56 | -0.52 | 2.19  | 1.94  | 2.68  | -0.45 | -1.07 | -1.06 | -1.30 | 6.81  | -2.57 |
| DFPZ57C163 | 26149  | NM_031310    | 16419 | -0.14 | 0.14  | -0.34 | 2.43  | 2.81  | 2.56  | -0.76 | -0.77 | -1.04 | -0.34 | 7.81  | -2.58 |
| PBRN1      | 8196   | NM_001943    | 16420 | -0.46 | -0.79 | -0.86 | 0.71  | 0.86  | 0.71  | -0.86 | -0.79 | -0.86 | -2.95 | 0.76  | -2.58 |
| YPL1       | 29799  | NM_013131    | 16421 | -0.46 | -0.57 | -0.52 | 0.37  | 0.45  | 0.88  | -0.76 | -0.91 | -0.91 | -1.55 | 1.70  | -2.58 |
| KMA1324    | 57535  | NM_020775    | 16422 | -0.20 | -0.71 | -0.82 | 1.67  | 3.42  | 2.37  | -0.33 | -1.15 | -1.09 | -1.33 | 7.46  | -2.58 |
| SP5        | 82     | NM_014207    | 16423 | 0.94  | 1.10  | -0.99 | 1.67  | 1.67  | 1.67  | -0.94 | -1.10 | -0.99 | -2.23 | 4.98  | -2.58 |
| LLR4P11    | 11141  | NM_014271    | 16424 | -0.77 | -0.71 | -0.80 | 0.73  | 0.81  | 1.22  | -0.67 | -0.95 | -0.95 | -2.17 | 2.77  | -2.58 |
| KON11      | 3767   | NM_000525    | 16425 | -0.69 | -1.08 | -1.03 | 0.23  | 0.77  | 0.82  | -0.73 | -1.05 | -0.79 | -2.80 | 1.82  | -2.58 |
| EP1        | 11245  | NM_001223    | 16426 | -0.72 | -0.49 | -0.79 | -0.40 | -0.87 | -0.40 | -0.87 | -0.40 | -0.87 | -1.99 | 2.15  | -2.58 |
| SGCD       | 6444   | NM_172244    | 16427 | -0.43 | -0.73 | -0.80 | 0.55  | 1.13  | 1.17  | -0.89 | -0.88 | -0.81 | -2.00 | 2.86  | -2.58 |
| FLU2969    | 64860  | NM_022838    | 16428 | -1.53 | -1.53 | -1.63 | -0.98 | 0.53  | -0.35 | -0.61 | -1.22 | -0.75 | -4.69 | -0.80 | -2.58 |
| GYPF       | 2993   | NM_020299    | 16429 | -1.23 | -1.06 | -1.26 | -0.09 | -0.61 | -0.40 | -1.12 | -0.66 | -0.79 | -3.56 | -0.99 | -2.58 |
| PC25       | 6230   | NM_001028    | 16430 | -0.92 | -1.13 | -0.88 | -0.47 | -0.70 | 0.44  | -0.95 | -1.02 | -0.90 | -2.94 | 0.20  | -2.58 |
| POLM1      | 9124   | NM_020992    | 16431 | -0.16 | -0.26 | 0.06  | 3.88  | 2.06  | 2.41  | -0.89 | -0.74 | -0.95 | -0.17 | 6.35  | -2.58 |
| TS1        | 7263   | NM_003312    | 16432 | -0.67 | -0.99 | -0.57 | 1.27  | 2.63  | 3.88  | -0.34 | -0.96 | -1.28 | -2.23 | 7.78  | -2.58 |
| LS102      | 24878  | NM_023236    | 16433 | -0.25 | -0.33 | -0.24 | 2.40  | 2.40  | 2.40  | -0.25 | -0.33 | -0.24 | -0.32 | 7.23  | -2.58 |
| OSAP       | 84709  | NM_032623    | 16434 | -0.30 | -0.11 | -0.87 | 2.34  | 1.57  | 0.71  | -0.76 | -0.88 | -0.9  |       |       |       |

|           |        |             |       |       |       |       |       |       |       |       |       |       |       |       |       |
|-----------|--------|-------------|-------|-------|-------|-------|-------|-------|-------|-------|-------|-------|-------|-------|-------|
| MCC15387  | 90407  | NM_008052   | 16517 | -0.65 | -1.09 | -0.77 | 1.43  | 1.04  | 0.23  | -0.67 | -1.10 | 0.85  | -2.51 | 1.69  | -2.63 |
| MDRCL1    | 85480  | NM_022323   | 16518 | -0.76 | -0.58 | -0.65 | 1.28  | 1.02  | 0.86  | -0.56 | -0.62 | -1.16 | -2.41 | 1.81  | -2.68 |
| LPI       | 149588 | NM_198996   | 16519 | -0.70 | 0.77  | -1.02 | 0.29  | 1.03  | 0.16  | 0.57  | -0.99 | -1.06 | -2.49 | 1.48  | -2.63 |
| FLI0378   | 55132  | NM_178043   | 16520 | -0.45 | -0.90 | -0.79 | 0.67  | 1.76  | 0.02  | -0.70 | -1.12 | -0.81 | -2.14 | 2.45  | -2.83 |
| KRTE      | 28887  | NM_173886   | 16521 | -1.14 | -1.07 | -0.75 | 0.00  | 1.23  | 0.63  | -0.89 | -0.89 | -0.85 | -2.96 | 0.86  | -2.83 |
| CTSP1     | 95130  | NM_012642   | 16522 | -1.13 | 0.93  | -1.13 | 0.82  | 1.09  | 0.84  | -0.73 | -0.71 | -0.96 | -3.19 | 0.71  | -2.83 |
| CG3343    | 93343  | NM_138401   | 16523 | -0.42 | -0.31 | -0.87 | 1.45  | 1.64  | 2.84  | -0.82 | -0.70 | -1.11 | -1.60 | 5.93  | -2.63 |
| GALNT12   | 117248 | NM_054110   | 16524 | -1.17 | -1.43 | -1.18 | -0.09 | 0.13  | 2.39  | -0.82 | -0.90 | -0.91 | -3.78 | 2.43  | -2.63 |
| HOMER3    | 965    | NM_012638   | 16525 | -1.06 | 0.97  | -1.17 | 1.13  | 1.13  | 1.13  | -0.35 | -1.06 | -1.16 | -2.31 | 3.22  | -2.63 |
| GRP160    | 26996  | NM_014373   | 16526 | -0.30 | -0.33 | 0.23  | 2.14  | 1.66  | 2.49  | -1.04 | -0.97 | -0.61 | -0.40 | 6.20  | -2.63 |
| CLN8      | 2095   | NM_018941   | 16527 | -0.20 | -0.73 | -0.58 | 2.29  | 0.49  | 1.91  | -0.82 | -0.91 | -0.90 | -1.50 | 4.69  | -2.63 |
| TRB1      | 1021   | NM_013195   | 16528 | -1.01 | -1.01 | -0.77 | 1.00  | 1.00  | 1.00  | -0.77 | -0.77 | -0.77 | -3.16 | 2.98  | -2.63 |
| BAHD3     | 22893  | NM_014952   | 16529 | -0.98 | 0.53  | -0.76 | 0.53  | 1.22  | 0.03  | -0.80 | -0.94 | -0.89 | -2.27 | 2.68  | -2.63 |
| PIAS2     | 9063   | NM_173206   | 16530 | -1.05 | -1.34 | -0.91 | -0.40 | -0.30 | 0.02  | -0.99 | -1.15 | -0.50 | -3.30 | -0.32 | -2.63 |
| NMMP12    | 89848  | NM_012549   | 16531 | -0.57 | -0.80 | -0.76 | 1.55  | 1.08  | 1.80  | -0.48 | -1.01 | -1.14 | -0.99 | 4.44  | -2.63 |
| PRND      | 2382   | NM_012409   | 16532 | -1.21 | 1.05  | -1.69 | -1.17 | -0.90 | -0.31 | 1.68  | -0.86 | -1.09 | -3.96 | 2.38  | -2.63 |
| ITPKC     | 80271  | NM_025194   | 16533 | -0.60 | -0.97 | -1.05 | 1.14  | 1.38  | 1.35  | -0.91 | -0.71 | -1.02 | -2.63 | 3.88  | -2.64 |
| DLLARD    | 23399  | NM_015343   | 16534 | -0.63 | -1.02 | -0.62 | 0.85  | 0.83  | 1.08  | -0.65 | -1.16 | -0.83 | -2.27 | 2.75  | -2.64 |
| NMSP23    | 51640  | NM_016700   | 16535 | -1.14 | -0.92 | -0.79 | 0.11  | 0.88  | 1.34  | -0.51 | -0.83 | -0.89 | -2.85 | 2.32  | -2.64 |
| LY96      | 23643  | NM_015364   | 16536 | -0.93 | -0.69 | -1.27 | -0.15 | 0.95  | -0.30 | -0.85 | -0.84 | -0.95 | -2.89 | 4.40  | -2.64 |
| APPBP2    | 10513  | NM_006380   | 16537 | -0.72 | -0.56 | 0.87  | 1.84  | 2.46  | 2.11  | -1.12 | -1.06 | -0.46 | -0.41 | 6.40  | -2.64 |
| HC20      | 150274 | NM_172002   | 16538 | -0.51 | -0.76 | 0.04  | 1.22  | 0.74  | 1.59  | -0.96 | -0.91 | -0.77 | -1.23 | 3.55  | -2.64 |
| ZDHHC21   | 340481 | NM_179566   | 16539 | -0.63 | -0.61 | -1.01 | 1.19  | 1.35  | 0.43  | -0.95 | -0.91 | -0.78 | -2.25 | 2.98  | -2.64 |
| CTPS2     | 56474  | NM_019857   | 16540 | -0.48 | -0.79 | -1.17 | 0.80  | 1.04  | 1.11  | -0.78 | -0.96 | -0.90 | -2.44 | 2.94  | -2.64 |
| KPC6      | 23214  | NM_015171   | 16541 | -0.76 | -0.71 | -0.89 | 0.90  | 0.86  | 1.29  | -0.68 | -0.94 | -1.02 | -2.36 | 3.05  | -2.64 |
| CMTA1     | 23202  | NM_015215   | 16542 | -0.65 | -0.57 | -0.66 | 0.73  | 0.39  | 0.94  | -0.87 | -0.96 | -0.81 | -1.88 | 2.96  | -2.64 |
| ZNF140    | 7699   | NM_003440   | 16543 | -0.56 | -0.94 | -0.93 | 0.34  | 0.77  | 0.20  | -0.70 | -1.02 | -0.92 | -2.43 | 1.32  | -2.64 |
| ITGA10    | 8515   | NM_003037   | 16544 | -0.78 | -0.77 | -0.67 | 1.08  | 1.01  | 0.80  | -0.86 | -0.80 | -0.96 | -2.22 | 2.89  | -2.64 |
| GFIF      | 5485   | NM_016704   | 16545 | -0.61 | -0.66 | -0.48 | 1.22  | 1.32  | 3.02  | -0.99 | -0.92 | -0.79 | -1.93 | 3.64  | -2.64 |
| ZBTB16    | 7704   | NM_01018011 | 16546 | -1.12 | -0.62 | -1.03 | 1.23  | 1.33  | 0.39  | -0.72 | -0.92 | -1.01 | -2.77 | 2.96  | -2.64 |
| BMDC1     | 84154  | NM_032194   | 16547 | -0.90 | -1.36 | -1.40 | -0.19 | 0.32  | 0.07  | -0.63 | -0.98 | -1.04 | -3.66 | 2.00  | -2.64 |
| ARHGFB16  | 27237  | NM_018448   | 16548 | -0.70 | -0.65 | -0.74 | 1.65  | 1.08  | 1.08  | -0.85 | -1.05 | -0.78 | -1.99 | 4.62  | -2.64 |
| SEAC1     | 84947  | NM_032861   | 16549 | -1.14 | 1.32  | -0.19 | -2.79 | 2.71  | 3.06  | -1.05 | -1.00 | -0.90 | -6.01 | 8.56  | -2.64 |
| C19ORF19  | 28445  | NM_182577   | 16550 | -1.12 | -1.07 | -1.00 | 0.10  | 0.67  | -0.42 | -1.00 | -0.99 | -0.66 | -3.19 | 0.35  | -2.64 |
| SAS10     | 57950  | NM_020388   | 16551 | -0.84 | -1.02 | -0.98 | 1.16  | 0.51  | 1.37  | -0.74 | -0.91 | -0.99 | -2.84 | 2.05  | -2.64 |
| C14ORF149 | 112849 | NM_144581   | 16552 | -0.81 | -0.56 | -0.77 | 0.67  | 0.84  | 0.37  | -0.60 | -0.84 | -0.87 | -2.44 | 1.35  | -2.64 |
| GRP1      | 2825   | NM_005279   | 16553 | -0.58 | -0.75 | -0.59 | 0.88  | 1.29  | 1.21  | -0.99 | -0.78 | -0.88 | -1.93 | 3.39  | -2.65 |
| MIRCL11   | 414308 | NM_01009567 | 16554 | -0.59 | -0.92 | -1.23 | 0.88  | 1.18  | 2.00  | -0.58 | -0.77 | -1.30 | -2.74 | 3.06  | -2.65 |
| L1RL      | 5127   | NM_015355   | 16555 | -1.01 | -1.59 | -1.41 | -1.04 | -0.57 | 0.41  | -1.04 | -0.67 | -0.80 | -2.01 | 1.82  | -2.65 |
| LATS1     | 9113   | NM_004690   | 16556 | -0.85 | -0.75 | -0.71 | 1.80  | 1.69  | 1.08  | -0.96 | -0.92 | -0.77 | -2.30 | 4.57  | -2.65 |
| LOC10039  | 90639  | NM_01031617 | 16557 | -0.20 | -0.69 | -0.25 | 2.73  | 1.65  | 1.38  | -0.66 | -1.07 | -0.92 | -1.14 | 5.75  | -2.65 |
| HPH       | 149    | NM_000000   | 16558 | -0.75 | -0.86 | -0.79 | 0.48  | 0.87  | 1.04  | -0.85 | -0.74 | -0.81 | -2.41 | 2.85  | -2.65 |
| CY24A1    | 1591   | NM_000782   | 16559 | -0.85 | -1.10 | -0.62 | 0.00  | 0.28  | 0.48  | -0.76 | -1.05 | -0.84 | -0.77 | 0.77  | -2.65 |
| CSORF76   | 80010  | NM_024945   | 16560 | -1.09 | -0.09 | -0.93 | 0.27  | 1.53  | 1.14  | -0.89 | -0.67 | -1.10 | -2.10 | 2.93  | -2.65 |
| SERPINE2  | 5270   | NM_006216   | 16561 | -0.81 | -0.67 | -0.84 | 0.89  | 1.13  | 0.49  | -0.81 | -1.00 | -0.84 | -2.32 | 2.50  | -2.65 |
| R3HSD1A   | 8348   | NM_031207   | 16562 | -1.07 | -0.84 | -0.97 | 0.80  | 0.87  | 1.09  | -1.12 | -0.79 | -0.90 | -2.80 | 1.60  | -2.65 |
| MIR128    | 10573  | NM_006428   | 16563 | -1.21 | -1.22 | -0.92 | 0.22  | 0.35  | -0.35 | -1.03 | -1.10 | -0.53 | -3.86 | -0.21 | -2.65 |
| DGMDH     | 29958  | NM_013191   | 16564 | -0.29 | -0.58 | -0.55 | 1.27  | 1.24  | 0.83  | -0.74 | -0.99 | -0.93 | -1.42 | 3.33  | -2.66 |
| HCTD2     | 79655  | NM_020602   | 16565 | -1.24 | -1.11 | -1.48 | -1.62 | -1.04 | 1.24  | -0.82 | -1.04 | -1.04 | -2.82 | 0.99  | -2.66 |
| SERPINA4  | 5267   | NM_006215   | 16566 | -0.84 | -1.10 | -0.61 | 1.41  | 1.67  | 1.30  | -0.90 | -1.06 | -0.70 | -2.56 | 4.38  | -2.66 |
| SERPINA1  | 710    | NM_01032295 | 16567 | -0.53 | -0.70 | -0.94 | 1.34  | 1.03  | 1.46  | -0.82 | -0.87 | -0.96 | -2.17 | 3.83  | -2.66 |
| HLX2C4    | 1719   | NM_000762   | 16568 | -0.34 | -0.61 | -0.67 | 2.80  | 0.41  | -0.77 | -1.07 | -0.82 | -1.14 | -1.74 | 5.88  | -2.66 |
| LPT       | 8513   | NM_004190   | 16569 | -0.45 | -0.33 | -0.88 | 0.67  | 0.73  | 1.49  | -0.84 | -0.69 | -1.14 | -1.60 | 2.89  | -2.66 |
| GTI2H2    | 2966   | NM_001515   | 16570 | -0.57 | -1.02 | -0.85 | -0.09 | 0.05  | 0.42  | -0.69 | -1.02 | -0.95 | -2.44 | 0.38  | -2.66 |
| HST1H2AB  | 8335   | NM_003513   | 16571 | -0.26 | -0.48 | -0.48 | 4.07  | 2.59  | 1.92  | -1.10 | -0.98 | -0.57 | -0.27 | 8.57  | -2.66 |
| LYZ1103   | 79027  | NM_024556   | 16572 | -0.92 | -0.66 | -1.15 | 0.00  | -0.66 | 1.03  | -0.87 | -0.63 | -0.92 | -0.79 | 3.99  | -2.66 |
| LYZ       | 4069   | NM_000239   | 16573 | -0.99 | -1.09 | -0.87 | 2.23  | 1.27  | 1.78  | -1.06 | -1.00 | -0.61 | -2.96 | 5.28  | -2.66 |
| MATN3     | 4148   | NM_002181   | 16574 | -0.75 | -1.70 | -0.49 | 1.80  | 0.63  | 0.56  | -1.10 | -0.89 | -0.67 | -1.98 | 2.99  | -2.66 |
| LOC100461 | 14943  | NM_020388   | 16575 | -0.74 | -0.61 | -0.61 | 0.43  | 0.61  | 0.37  | -0.60 | -0.82 | -1.01 | -2.57 | 1.71  | -2.66 |
| CYBB2     | 1415   | NM_000496   | 16576 | 0.09  | -0.42 | 0.45  | 2.27  | 1.97  | 0.98  | -0.89 | -1.03 | -0.74 | 0.13  | 5.22  | -2.66 |
| CLCSF8    | 33839  | NM_080387   | 16577 | -0.51 | -0.50 | -0.69 | 1.98  | 1.82  | 1.22  | -0.87 | -0.84 | -0.95 | -1.70 | 5.02  | -2.66 |
| FLN2      | 10896  | NM_000700   | 16578 | -0.13 | -0.48 | -0.48 | 2.85  | 2.48  | 2.34  | -0.49 | -0.82 | -0.60 | -1.23 | 2.67  | -2.66 |
| PCTP      | 58488  | NM_021123   | 16579 | -1.06 | -0.89 | -0.06 | 2.01  | 3.13  | 1.10  | -1.29 | -1.16 | -0.21 | -1.89 | 6.24  | -2.66 |
| USP6      | 9098   | NM_004505   | 16580 | -1.13 | -1.46 | -0.93 | 3.63  | 1.07  | 3.38  | -0.99 | -1.01 | -0.66 | -3.53 | 8.08  | -2.67 |
| COA5      | 80347  | NM_025233   | 16581 | -0.20 | -0.47 | -0.31 | 2.08  | 1.48  | 2.42  | -0.77 | -0.88 | -1.02 | -0.99 | 5.98  | -2.67 |
| CSRF5     | 54165  | NM_00018482 | 16582 | -0.60 | -0.89 | -0.89 | 1.14  | 1.14  | 1.14  | -0.87 | -0.97 | -0.96 | -2.40 | 2.9   | -2.67 |
| LOC10039  | 54905  | NM_017781   | 16583 | -1.33 | -1.41 | -1.28 | -1.03 | -0.54 | -1.08 | -1.05 | -1.02 | -0.87 | -2.07 | 0.87  | -2.67 |
| MTHFD2    | 10797  | NM_006306   | 16584 | -1.25 | -0.81 | -1.36 | -0.15 | -0.37 | -0.52 | -0.88 | -0.77 | -1.01 | -3.41 | -1.05 | -2.67 |
| PHF2      | 2712   | NM_000421   | 16585 | -1.02 | -1.09 | -1.04 | 0.42  | 1.17  | 1.32  | -0.42 | -1.17 | -1.04 | -2.35 | 2.73  | -2.67 |
| GLTD1     | 360303 | NM_182974   | 16586 | -0.73 | -0.67 | -1.33 | 0.50  | 0.40  | -0.02 | -0.92 | -0.74 | -1.00 | -0.73 | 0.83  | -2.67 |
| DH1       | 50846  | NM_021044   | 16587 | -0.60 | -1.21 | -1.28 | -0.11 | 0.40  | -0.48 | -0.60 | -1.11 | -0.95 | -3.09 | -0.19 | -2.67 |
| HR23      | 5749   | NM_000731   | 16588 | -0.84 | -0.83 | -1.07 | 1.14  | 1.08  | 1.14  | -0.84 | -0.83 | -1.07 | -1.54 | 2.09  | -2.67 |
| LRN3      | 54674  | NM_018134   | 16589 | -0.88 | -0.65 | -0.87 | 0.46  | -0.07 | -0.02 | -1.16 | -0.60 | -0.91 | -2.41 | 0.37  | -2.67 |
| LOC101827 | 401827 | NM_01025190 | 16590 | -0.86 | -0.64 | -0.69 | 0.74  | 1.37  | 1.34  | -1.00 | -0.77 | -0.89 | -2.19 | 3.45  | -2.67 |
| ZNF38     | 57541  | NM_170686   | 16591 | -0.59 | -0.47 | -0.72 | 1.04  | 1.61  | 1.08  | -0.77 | -0.85 | -1.04 | -1.78 | 3.72  | -2.67 |
| GHR       | 200    | NM_000413   | 16592 | -0.72 | -1.22 | -0.99 | 0.12  | 0.16  | 0.61  | -0.53 | -1.02 | -0.96 | -2.93 | 2.17  | -2.67 |
| FLJ3812   | 25252  | NM_153260   | 16593 | -0.81 | -0.88 | 0.17  | 2.41  | 1.60  | 2.75  | -1.04 | -0.79 | -0.85 | -1.52 | 6.76  | -2.67 |
| CDORF77   | 58490  | NM_021215   | 16594 | -1.11 | -0.62 | -0.94 | 0.24  | 0.03  | 1.03  | -1.10 | -0.61 | -0.95 | -2.67 | 3.00  | -2.67 |
| LOC104006 | 64406  | NM_029633   | 16595 | -0.74 | -0.76 | -0.70 | 0.63  | 0.76  | 0.63  | -0.82 | -0.76 | -0.82 | -1.25 | 2.41  | -2.67 |
| DHS4      | 10901  | NM_021004   | 16596 | -0.54 | -1.26 | -0.86 | 0.66  | 2.49  | 0.94  | -0.54 | -1.21 | -0.92 | -2.66 | 4.09  | -     |

|             |        |             |       |       |       |       |       |       |       |       |       |       |       |       |       |       |
|-------------|--------|-------------|-------|-------|-------|-------|-------|-------|-------|-------|-------|-------|-------|-------|-------|-------|
| RMF17       | 56163  | NM_031994   | 16679 | -0.47 | -0.62 | 2.46  | 4.04  | 4.66  | 6.32  | -0.95 | -0.99 | -0.78 | 1.37  | 15.02 | -2.71 |       |
| RM2E2       | 7195   | NM_021653   | 16680 | -0.67 | -1.21 | -1.07 | 1.61  | 1.49  | 1.27  | -0.61 | -0.91 | -1.11 | -1.11 | 3.14  | -2.71 |       |
| MSC43690    | 25769  | NM_182552   | 16681 | 0.38  | 0.22  | -0.41 | 2.59  | 3.18  | 2.08  | -1.01 | -0.84 | 0.86  | -1.10 | 7.85  | -2.71 |       |
| CYPIA2      | 1544   | NM_000761   | 16682 | -1.00 | -1.12 | -0.85 | 0.14  | 1.10  | -0.07 | -0.75 | -1.15 | -0.82 | -2.96 | 1.17  | -2.71 |       |
| PSMCA       | 5704   | NM_153001   | 16683 | -1.13 | -0.08 | -0.73 | 2.45  | 1.40  | 1.66  | -1.28 | -0.55 | -0.86 | -1.94 | 5.52  | -2.71 |       |
| MGC59971    | 97529  | NM_199001   | 16684 | 0.16  | 0.85  | 0.31  | 0.67  | 0.11  | 0.34  | -1.11 | -0.62 | 0.81  | -1.34 | 0.10  | -2.71 |       |
| PRRG2       | 5639   | NM_000951   | 16685 | -0.97 | -0.41 | -0.48 | 1.19  | 3.08  | 2.05  | -0.79 | -1.01 | -0.92 | -1.86 | 6.32  | -2.71 |       |
| GA17        | 10480  | NM_006360   | 16686 | -1.13 | -0.95 | -1.02 | 0.06  | 1.61  | 2.52  | -0.80 | -0.97 | -0.94 | -3.11 | 4.20  | -2.71 |       |
| CN1M11      | 12221  | NM_145203   | 16687 | 0.98  | 0.10  | 0.20  | 0.67  | 0.10  | 0.67  | -0.86 | -1.10 | -0.66 | -1.34 | 0.65  | -2.71 |       |
| FXDML3      | 387054 | NM_199358   | 16688 | -0.88 | -0.89 | -0.82 | 0.06  | 0.03  | 0.82  | -0.91 | -0.83 | -0.97 | -2.58 | 0.91  | -2.71 |       |
| THM43       | 129688 | NM_138800   | 16689 | -0.17 | -0.67 | -0.36 | 2.63  | 3.24  | 1.34  | -0.70 | -1.16 | -0.85 | -1.20 | 7.21  | -2.71 |       |
| LSORF21     | 283651 | NM_02032657 | 16690 | -0.63 | -0.51 | -0.62 | 0.51  | 0.62  | 0.76  | -0.62 | -0.77 | -0.86 | -2.51 | 2.28  | -2.71 |       |
| PRE53       | 5646   | NM_002771   | 16691 | 0.06  | 0.13  | -0.25 | 1.65  | 2.09  | 2.20  | -0.83 | -0.80 | -1.09 | -0.09 | 5.03  | -2.72 |       |
| C10DRF119   | 79892  | NM_024834   | 16692 | -1.03 | -0.83 | -1.37 | -0.25 | 0.20  | 0.30  | -0.81 | -0.90 | -1.01 | -3.00 | 0.25  | -2.72 |       |
| DYRK3       | 8444   | NM_003582   | 16693 | -0.89 | -0.79 | -1.01 | 0.57  | 0.39  | 0.88  | -0.90 | -0.81 | -1.02 | -2.89 | 1.84  | -2.72 |       |
| LC143941    | 14884  | NM_00100441 | 16694 | -1.29 | -1.36 | -1.15 | 0.16  | 0.44  | 0.26  | -1.13 | -0.92 | -0.68 | -3.80 | 0.54  | -2.72 |       |
| C17orf41    | 79915  | NM_024857   | 16695 | -0.75 | -1.21 | -1.38 | 1.77  | 0.66  | 0.68  | -0.84 | -1.06 | -0.82 | -3.34 | 3.11  | -2.72 |       |
| LOC90355    | 90355  | NM_032311   | 16696 | -0.81 | -1.30 | -0.94 | -0.18 | 0.25  | 0.34  | -0.58 | -1.30 | -0.84 | -3.04 | 0.41  | -2.72 |       |
| MM40280     | 23201  | NM_015159   | 16697 | -0.04 | 0.16  | -0.40 | 1.62  | 3.36  | 3.69  | -0.77 | -0.91 | -1.03 | -0.28 | 8.66  | -2.72 |       |
| DKFZP644012 | 29515  | NM_199074   | 16698 | -1.07 | -1.08 | -0.63 | 1.02  | 1.84  | 1.41  | -0.96 | -1.01 | -0.76 | -2.77 | 4.27  | -2.72 |       |
| PKP3        | 11387  | NM_007183   | 16699 | -0.88 | -0.54 | -0.74 | 0.21  | 0.66  | 1.47  | -0.97 | -0.86 | -0.90 | -2.17 | 2.35  | -2.72 |       |
| PTGER4      | 5734   | NM_000958   | 16700 | 0.02  | -0.04 | -0.37 | 2.77  | 2.04  | 2.47  | -0.97 | -0.83 | -0.93 | -0.39 | 7.28  | -2.72 |       |
| LOC283985   | 283985 | NM_178128   | 16701 | -1.21 | -0.99 | -0.51 | 0.74  | 1.22  | 0.82  | -1.08 | -1.04 | -0.60 | -2.71 | 2.79  | -2.72 |       |
| EDN1        | 1906   | NM_001955   | 16702 | -0.92 | -0.32 | -0.55 | 1.92  | 2.32  | 2.04  | -1.08 | -0.65 | -0.99 | -1.78 | 6.28  | -2.72 |       |
| FLJ1220     | 55325  | NM_018359   | 16703 | -0.27 | -0.65 | -0.71 | 1.75  | 1.34  | 1.59  | -0.84 | -0.95 | -0.94 | -1.63 | 4.64  | -2.72 |       |
| HST272428   | 31772  | NM_175095   | 16704 | -0.89 | -0.99 | -0.42 | 1.85  | 1.74  | 2.52  | -1.09 | -0.87 | -0.76 | -1.96 | 6.11  | -2.72 |       |
| GAST        | 831    | NM_173061   | 16705 | -0.71 | -0.89 | -1.28 | 0.22  | -0.16 | -0.12 | -0.65 | -0.91 | -1.16 | -2.88 | -0.05 | -2.72 |       |
| FLJ12436    | 79714  | NM_024661   | 16706 | -1.38 | -1.21 | -0.86 | -0.30 | 0.29  | 0.52  | -1.07 | -1.12 | -0.53 | -3.45 | 0.51  | -2.73 |       |
| LOC93253    | 93253  | NM_178455   | 16707 | -0.89 | -0.86 | -0.45 | 0.87  | 0.46  | 0.48  | -0.92 | -0.86 | -0.92 | -2.26 | 7.99  | -2.73 |       |
| CNG4A       | 12602  | NM_00103729 | 16708 | -0.21 | 0.50  | 0.67  | 3.24  | 4.43  | 3.99  | -0.92 | -1.13 | -0.68 | -0.96 | 11.67 | -2.73 |       |
| TRMC6       | 27327  | NM_020847   | 16709 | -0.59 | -1.14 | -1.20 | 0.21  | 0.13  | 0.73  | -1.01 | -0.72 | -1.00 | -2.92 | 2.07  | -2.73 |       |
| MGC43997    | 12185  | NM_017318   | 16710 | -1.26 | -1.26 | -0.76 | -1.07 | -0.76 | -0.44 | -1.07 | -0.76 | -0.44 | -1.07 | -0.44 | -2.73 |       |
| USP28       | 57646  | NM_020886   | 16711 | -0.66 | -0.73 | -0.90 | 0.59  | 1.36  | 0.67  | -0.99 | -0.76 | -0.97 | -2.62 | 7.73  | -2.73 |       |
| TRPM2       | 7226   | NM_003307   | 16712 | -0.87 | -0.96 | -0.95 | 0.84  | 0.49  | 1.44  | -0.83 | -0.89 | -1.01 | -2.78 | 2.76  | -2.73 |       |
| WNT118      | 7480   | NM_003594   | 16713 | -0.79 | -0.93 | -0.42 | 1.98  | 1.02  | 1.99  | -1.04 | -0.89 | -0.79 | -2.14 | 4.99  | -2.73 |       |
| LOC112318   | 132438 | NM_00108308 | 16714 | 0.49  | 0.53  | -0.17 | 0.52  | 0.17  | 0.85  | -1.17 | -0.85 | -1.17 | -0.85 | 10.44 | -2.73 |       |
| MAMDC1      | 16137  | NM_182830   | 16715 | -0.69 | -0.49 | -0.77 | 1.66  | 2.24  | 2.56  | -0.62 | -0.88 | -0.77 | -0.98 | 1.99  | -2.73 |       |
| MYO7A       | 4647   | NM_002260   | 16716 | -0.28 | -0.48 | -1.05 | 1.19  | 2.28  | 2.62  | -0.48 | -1.08 | -1.16 | -1.81 | 6.09  | -2.73 |       |
| MYO9E       | 7180   | NM_002396   | 16717 | -0.13 | -0.20 | -0.71 | 1.02  | 1.02  | 1.29  | -1.02 | -1.02 | -1.29 | -1.84 | 3.71  | -2.73 |       |
| MYLIP       | 29116  | NM_013262   | 16718 | 0.25  | 1.27  | 2.99  | 12.23 | 9.65  | 8.67  | -1.09 | -0.78 | -0.86 | -5.50 | 30.54 | -2.73 |       |
| SEC14L4     | 284904 | NM_174977   | 16719 | -1.24 | -2.35 | -1.21 | 0.37  | -0.06 | 0.13  | -1.14 | -0.77 | -0.82 | -3.81 | 0.43  | -2.73 |       |
| LOC4343     | 29015  | NM_021611   | 16720 | -0.66 | -0.40 | -0.27 | 1.42  | 1.77  | 1.42  | -1.01 | -0.71 | -0.81 | -1.33 | 4.73  | -2.73 |       |
| RS1         | 6247   | NM_000330   | 16721 | -0.66 | 0.93  | -1.62 | 1.37  | 0.76  | 0.49  | -0.81 | -0.82 | -1.10 | -2.62 | 2.73  | -2.73 |       |
| HEC2        | 23119  | NM_015094   | 16722 | -0.84 | -0.86 | -0.54 | 2.14  | 0.58  | 2.13  | -1.08 | -0.75 | -0.90 | -2.24 | 4.84  | -2.73 |       |
| FLJ14345    | 79798  | NM_024773   | 16723 | -1.13 | -0.82 | -0.99 | 0.36  | 0.35  | 0.01  | -1.01 | -1.03 | -0.69 | -2.88 | 0.72  | -2.73 |       |
| LRRL1G      | 11019  | NM_006858   | 16724 | 0.54  | 0.53  | 0.33  | 0.51  | 0.07  | 2.02  | -1.07 | -1.02 | -0.61 | -0.72 | 8.75  | -2.73 |       |
| LOC283116   | 283116 | NM_00170988 | 16725 | -1.81 | -0.74 | -0.18 | 5.64  | 3.80  | 5.76  | -1.20 | -0.65 | -0.89 | -2.73 | 15.20 | -2.73 |       |
| CORBP3      | 84946  | NM_032860   | 16726 | -1.11 | -1.24 | -1.64 | -0.30 | 0.35  | -0.24 | -0.61 | -1.08 | -1.05 | -3.99 | -0.19 | -2.74 |       |
| LOC62       | 41415  | NM_02109997 | 16727 | -0.67 | -0.47 | -0.78 | 1.67  | 1.16  | 1.67  | -0.67 | -0.47 | -0.78 | -1.72 | 3.80  | -2.74 |       |
| OMD         | 4958   | NM_005014   | 16728 | -0.96 | 0.04  | -0.47 | 1.34  | 2.57  | 2.52  | -1.02 | -0.80 | -0.92 | -1.40 | 6.43  | -2.74 |       |
| NFRP1A      | 27018  | NM_014880   | 16729 | -0.93 | -0.87 | -1.12 | 0.26  | 0.60  | 0.43  | -0.85 | -0.84 | -1.05 | -2.92 | 1.29  | -2.74 |       |
| LOC434142   | 84520  | NM_018490   | 16730 | -0.31 | -0.84 | -0.66 | 1.16  | 1.11  | 1.76  | -0.72 | -1.07 | -0.85 | -1.94 | 4.13  | -2.74 |       |
| MMO2        | 221938 | NM_198403   | 16731 | 0.15  | -0.68 | -1.00 | 2.00  | 1.44  | 0.65  | -0.58 | -1.01 | -1.16 | -5.20 | 0.49  | -2.74 |       |
| FLJ20558    | 54880  | NM_017880   | 16732 | -1.66 | -1.72 | -1.81 | 0.95  | 0.07  | 0.53  | -1.07 | -0.85 | -0.81 | -5.20 | 0.49  | -2.74 |       |
| NFB         | 4781   | NM_005596   | 16733 | 0.01  | -0.73 | -0.51 | 1.89  | 0.34  | 0.52  | -0.92 | -0.93 | -0.88 | -1.23 | 2.75  | -2.74 |       |
| USP38       | 952    | NM_001775   | 16734 | 0.76  | 0.42  | 0.65  | 0.87  | 1.19  | 1.80  | -1.05 | -0.89 | -1.02 | -2.92 | 3.92  | -2.74 |       |
| NYREN18     | 51607  | NM_016118   | 16735 | 0.67  | 0.27  | -0.15 | 2.50  | 2.55  | 2.12  | -0.66 | -0.98 | -1.10 | -0.79 | 7.17  | -2.74 |       |
| LOC387911   | 387911 | NM_00103737 | 16736 | -1.32 | -0.67 | -0.93 | 1.49  | -0.34 | 0.81  | -1.17 | -0.56 | -1.02 | -2.92 | 1.96  | -2.74 |       |
| USP14       | 11845  | NM_00100000 | 16737 | -0.99 | -0.66 | -0.94 | 0.99  | 0.99  | 0.99  | -1.14 | -0.98 | -1.02 | -2.59 | 2.73  | -2.74 |       |
| C16orf50    | 84229  | NM_021269   | 16738 | -1.36 | -1.74 | -1.58 | 1.30  | 0.64  | 1.55  | -0.81 | -0.86 | -1.08 | -4.67 | 3.49  | -2.74 |       |
| ACN3        | 9311   | NM_020322   | 16739 | -0.64 | -0.81 | -0.65 | 0.70  | 0.75  | 0.73  | -0.83 | -1.02 | -0.89 | -2.10 | 2.18  | -2.74 |       |
| PCP2        | 12606  | NM_014895   | 16740 | -0.37 | -0.37 | -0.78 | 0.37  | 1.40  | 2.49  | -0.86 | -0.87 | -1.08 | -2.12 | 4.51  | -2.74 |       |
| GCLM        | 2730   | NM_002061   | 16741 | -1.14 | -1.04 | -1.04 | -1.02 | 1.39  | 0.83  | -1.16 | -0.95 | -0.64 | -3.24 | 3.74  | -2.74 |       |
| LRRTM3      | 34731  | NM_178011   | 16742 | -0.79 | -1.04 | -1.17 | 0.50  | 0.37  | 0.91  | -0.40 | -1.17 | -1.18 | -3.00 | 1.79  | -2.74 |       |
| LOC440456   | 440456 | NM_096237   | 16743 | -1.10 | -0.35 | -0.99 | 1.43  | 1.83  | 1.19  | -0.67 | -0.96 | -1.11 | -1.44 | 4.46  | -2.74 |       |
| HMRP3       | 1021   | NM_002396   | 16744 | 0.84  | 0.38  | -0.38 | 0.77  | 1.05  | 0.96  | -0.77 | -1.05 | -0.96 | -1.72 | 3.84  | -2.74 |       |
| WARS        | 7453   | NM_213645   | 16745 | -0.74 | -0.61 | -0.13 | 0.88  | 1.34  | 1.73  | -1.05 | -1.03 | -0.66 | -1.48 | 3.96  | -2.74 |       |
| SNRPB       | 123238 | NM_145204   | 16746 | -1.14 | -0.99 | -0.80 | 0.19  | 2.49  | 1.64  | -1.05 | -0.78 | -0.91 | -2.92 | 4.32  | -2.74 |       |
| LOC15       | 641    | NM_021611   | 16747 | -1.14 | -1.14 | -1.14 | -1.14 | -1.14 | -1.14 | -1.14 | -1.14 | -1.14 | -1.14 | -1.14 | -1.14 | -2.74 |
| IMPDH2      | 3615   | NM_000884   | 16748 | -0.86 | -0.84 | -0.69 | -0.07 | 0.86  | 0.51  | -0.78 | -0.98 | -0.99 | -2.39 | 1.31  | -2.74 |       |
| FLJ16478    | 440695 | NM_00104341 | 16749 | -0.89 | -0.95 | -1.49 | 0.19  | 0.17  | 0.26  | -0.76 | -0.98 | -1.00 | -3.33 | 0.62  | -2.74 |       |
| BAI2B       | 8492   | NM_00100000 | 16750 | -0.89 | -0.65 | -0.62 | 1.61  | 0.74  | 0.66  | -0.86 | -0.88 | -1.00 | -2.51 | 3.01  | -2.74 |       |
| DKX4        | 1748   | NM_001934   | 16751 | 0.06  | 0.62  | -0.49 | 1.43  | 2.09  | 1.92  | -0.64 | -1.04 | -1.06 | -1.05 | 5.44  | -2.75 |       |
| FLJ23861    | 151590 | NM_152519   | 16752 | -0.99 | -0.90 | -0.62 | 1.62  | 1.57  | 1.28  | -1.05 | -1.04 | -0.65 | -2.50 | 4.47  | -2.75 |       |
| BC12A1      | 597    | NM_004049   | 16753 | -0.87 | -1.00 | -1.44 | 0.00  | -0.46 | -0.51 | -0.99 | -0.82 | -0.91 | -3.31 | -0.97 | -2.75 |       |
| C12orf42    | 1449   | NM_004389   | 16754 | 0.41  | 0.75  | 0.59  | 0.41  | 0.75  | 0.59  | 0.41  | 0.75  | 0.59  | 0.41  | 0.75  | 0.59  | -2.75 |
| LOC340061   | 340061 | NM_198282   | 16755 | -0.34 | -0.65 | -1.25 | 1.52  | 1.36  | 1.40  | -0.78 | -0.87 | -1.10 | -2.24 | 4.27  | -2.75 |       |
| CGI-09      | 51605  | NM_015939   | 16756 | -0.33 | -0.15 | -0.25 | 1.17  | 1.44  | 1.47  | -1.00 | -0.79 | -0.95 | -0.73 | 4.08  | -2.75 |       |
| MAD3-1      | 8547   | NM_021114   | 16757 | -1.16 | -1.76 | -1.16 | -1.16 | -1.16 | -1.16 | -1.16 | -1.16 | -1.16 | -1.16 | -1.16 | -1.16 | -2.75 |
| SLC11A1     | 66035  | NM_0        |       |       |       |       |       |       |       |       |       |       |       |       |       |       |



|              |        |              |       |       |       |       |       |       |       |       |       |       |       |       |       |
|--------------|--------|--------------|-------|-------|-------|-------|-------|-------|-------|-------|-------|-------|-------|-------|-------|
| GALNAC45-65T | 51363  | NM_015892    | 16841 | 0.16  | 0.04  | 0.01  | 3.17  | 1.40  | 2.87  | -0.99 | -0.61 | -1.19 | 0.21  | 7.45  | -2.79 |
| UT2542       | 202451 | NM_145600    | 16842 | -0.44 | -1.28 | -1.10 | -0.17 | 0.94  | 0.43  | -0.69 | -1.34 | -0.76 | -0.27 | 3.62  | 0.20  |
| WDR36        | 134451 | NM_139381    | 16843 | -0.67 | -1.13 | -1.10 | 1.02  | 1.26  | 1.34  | -0.65 | -1.07 | -1.07 | -0.20 | 3.61  | -2.79 |
| BGLAP        | 632    | NM_199173    | 16844 | -1.07 | -0.03 | -0.65 | 2.91  | 2.57  | 1.89  | -1.17 | -0.73 | -0.89 | -1.75 | 7.37  | -2.79 |
| RGR          | 89866  | NM_031327    | 16845 | -1.46 | -0.79 | -0.90 | 0.03  | 0.23  | 0.71  | -1.12 | -0.69 | -0.98 | -3.16 | 0.97  | -2.79 |
| ZNF300       | 9157   | NM_006860    | 16846 | 0.46  | 0.46  | 0.46  | 2.54  | 2.51  | 3.11  | -0.84 | -0.84 | -1.06 | -1.96 | 8.16  | -2.79 |
| GRF18        | 2841   | NM_005292    | 16847 | -1.11 | -1.06 | -0.74 | 1.50  | 1.55  | 0.75  | -0.85 | -1.01 | -0.93 | -2.91 | 3.80  | -2.79 |
| SUC3B2       | 54407  | NM_018976    | 16848 | -0.07 | -0.62 | -0.24 | 2.84  | 2.12  | 2.63  | -0.90 | -1.14 | -0.75 | -0.80 | 7.60  | -2.79 |
| GFY41        | 63840  | NM_018107    | 16849 | 0.65  | 0.78  | 0.60  | 1.63  | 1.64  | 1.74  | -0.65 | -0.78 | -0.74 | -0.22 | 3.86  | -2.79 |
| KR2D5        | 57392  | NM_020335    | 16850 | 0.49  | -0.93 | -0.64 | 1.49  | 2.38  | 0.54  | -0.94 | -1.06 | -0.80 | -2.06 | 4.41  | -2.79 |
| LOC28566     | 285636 | NM_175921    | 16851 | -0.93 | -0.46 | -0.75 | 1.22  | 0.98  | 1.08  | -1.00 | -0.76 | -1.03 | -2.14 | 3.28  | -2.79 |
| RTN4R1       | 146760 | NM_01786568  | 16852 | -0.74 | -1.02 | -1.61 | -0.81 | 0.97  | 1.21  | -0.61 | -0.97 | -1.21 | -2.65 | 3.43  | -2.79 |
| NPY1         | 4886   | NM_000099    | 16853 | -1.14 | -0.87 | -0.64 | 0.45  | 1.23  | 0.77  | -1.05 | -0.97 | -0.77 | -2.65 | 2.45  | -2.79 |
| UBR2         | 10288  | NM_005874    | 16854 | -0.23 | 0.40  | -1.17 | 2.85  | 1.93  | 2.51  | -0.87 | -0.64 | -1.28 | -1.00 | 7.28  | -2.79 |
| MHL13        | 8735   | NM_003002    | 16855 | -0.95 | -0.14 | -0.66 | 1.84  | 2.29  | 1.48  | -0.83 | -0.94 | -1.02 | -1.75 | 5.61  | -2.80 |
| SORL1        | 10252  | NM_005839    | 16856 | -0.27 | 0.65  | -0.57 | 0.98  | 0.76  | 0.81  | -1.16 | -0.84 | -0.80 | -2.10 | 2.59  | -2.80 |
| CACNB1       | 782    | NM_199248    | 16857 | -0.99 | -0.71 | -0.76 | 0.61  | 1.17  | 0.55  | -1.08 | -0.92 | -0.80 | -2.47 | 2.33  | -2.80 |
| BOAZ         | 525900 | NM_001031827 | 16858 | -0.27 | -1.02 | 0.01  | 1.58  | 1.80  | 3.22  | -0.80 | -1.00 | -1.00 | -1.28 | 6.60  | -2.80 |
| DAP3         | 55967  | NM_018938    | 16859 | -1.29 | -1.22 | 0.70  | 0.56  | 0.06  | 0.87  | -1.21 | -1.16 | -0.43 | -3.82 | 1.49  | -2.80 |
| EF2C2        | 27161  | NM_012154    | 16860 | -0.57 | -1.21 | -0.79 | 0.87  | 0.18  | 0.89  | -0.89 | -0.92 | -0.99 | -2.56 | 1.95  | -2.80 |
| SGP2         | 130367 | NM_152386    | 16861 | -0.71 | -0.92 | -1.29 | 1.38  | 0.46  | 0.03  | -0.94 | -0.84 | -1.02 | -2.93 | 1.87  | -2.80 |
| ACT1         | 95     | NM_000666    | 16862 | -1.26 | -0.87 | -0.95 | 0.14  | 0.61  | 0.20  | -1.03 | -0.73 | -1.04 | -3.03 | 0.95  | -2.80 |
| NDFB9        | 4715   | NM_005005    | 16863 | -0.49 | -0.76 | -0.73 | 1.80  | 2.17  | 2.73  | -0.76 | -0.78 | -1.23 | -1.98 | 6.70  | -2.80 |
| CEACAM5      | 1048   | NM_004363    | 16864 | -0.86 | -1.21 | -1.05 | 1.32  | 1.80  | 1.07  | -0.86 | -1.07 | -0.87 | -3.12 | 4.19  | -2.80 |
| C1orf105     | 79656  | NM_024003    | 16865 | -0.73 | -0.91 | 0.23  | 2.28  | 1.42  | 1.92  | -1.16 | -1.14 | -0.50 | -1.41 | 5.62  | -2.80 |
| PHO2         | 5393   | NM_006259    | 16866 | -1.10 | -1.03 | -0.84 | 0.19  | 0.12  | 1.00  | -1.00 | -0.80 | -1.00 | -2.97 | 1.40  | -2.80 |
| TNXC10       | 54495  | NM_019022    | 16867 | -0.59 | -0.78 | -0.48 | 1.68  | 1.61  | 1.92  | -0.86 | -1.01 | -0.94 | -1.85 | 5.22  | -2.80 |
| PHU11        | 5413   | NM_002288    | 16868 | -1.15 | -0.92 | -0.81 | 0.68  | 1.20  | 0.78  | -1.00 | -0.75 | -0.97 | -2.88 | 2.65  | -2.80 |
| CTD11        | 1111   | NM_007174    | 16869 | -0.68 | -0.81 | -0.52 | 1.01  | 0.96  | 1.01  | -0.96 | -1.01 | -0.96 | -3.02 | 3.16  | -2.80 |
| CFZ595       | 55957  | NM_019104    | 16870 | 1.66  | -0.06 | 0.32  | 4.37  | 2.79  | 5.94  | -0.80 | -0.93 | -1.07 | 1.91  | 13.10 | -2.80 |
| IL13RA       | 3587   | NM_001558    | 16871 | -1.06 | -1.10 | -1.21 | 0.03  | 0.11  | -0.69 | -0.82 | -1.03 | -0.95 | -3.36 | 4.54  | -2.80 |
| LOC122133    | 6429   | NM_0203373   | 16872 | -1.33 | -0.49 | -1.19 | -0.81 | -0.49 | -1.04 | -1.04 | -0.81 | -0.81 | -3.02 | 1.42  | -2.80 |
| FRP1         | 2475   | NM_004958    | 16873 | 1.16  | -1.36 | -1.52 | -0.90 | -0.17 | -0.74 | -0.77 | -0.95 | -1.08 | -4.03 | -1.80 | -2.80 |
| FLJ1286      | 55337  | NM_018381    | 16874 | -0.76 | -0.29 | -0.05 | 2.94  | 3.24  | 3.10  | -1.21 | -1.00 | -0.59 | -1.10 | 9.28  | -2.80 |
| RNAE27       | 8635   | NM_003730    | 16875 | -0.68 | -1.02 | -0.26 | 1.82  | 1.86  | 1.69  | -0.84 | -1.16 | -0.80 | -1.95 | 5.35  | -2.81 |
| AP2C1        | 23780  | NM_038882    | 16876 | -0.79 | -0.33 | -0.31 | 1.11  | 0.95  | 0.99  | -0.65 | -1.11 | -0.95 | -2.99 | 4.65  | -2.81 |
| ZAP128       | 10965  | NM_006821    | 16877 | -0.68 | -1.12 | -0.61 | 1.30  | 1.81  | 0.92  | -1.02 | -0.90 | -0.88 | -1.40 | 4.03  | -2.81 |
| ROD-8        | 23644  | NM_014239    | 16878 | -1.11 | -1.13 | -0.73 | 0.87  | 1.44  | 0.48  | -0.98 | -1.12 | -0.71 | -2.97 | 2.79  | -2.81 |
| LOC12786     | 12632  | NM_006259    | 16879 | -0.15 | 0.87  | -0.46 | 1.69  | 1.58  | 1.68  | -0.59 | -0.88 | -0.87 | -1.18 | 5.18  | -2.81 |
| UBP1         | 7342   | NM_001128161 | 16880 | -0.75 | -0.50 | -0.81 | 0.67  | 1.44  | 1.02  | -0.99 | -0.90 | -0.91 | -2.05 | 3.14  | -2.81 |
| DUSP13       | 51207  | NM_016364    | 16881 | -1.20 | -1.25 | -1.44 | -0.48 | 0.32  | -0.09 | -0.74 | -0.96 | -1.11 | -3.89 | 0.25  | -2.81 |
| LOC142       | 6579   | NM_020575    | 16882 | -0.57 | -0.48 | -0.83 | 0.72  | 0.67  | 0.82  | -1.17 | -1.17 | -1.17 | -1.77 | 6.74  | -2.81 |
| EPXK1        | 83481  | NM_031308    | 16883 | -0.94 | -0.90 | -0.47 | 1.34  | 1.41  | 0.56  | -0.99 | -1.02 | -0.80 | -3.20 | 3.20  | -2.81 |
| PNX1         | 54984  | NM_017884    | 16884 | -1.11 | -0.88 | -0.87 | 0.24  | 0.43  | 1.00  | -0.90 | -0.94 | -0.97 | -2.86 | 1.67  | -2.81 |
| SUC22A6      | 9356   | NM_153277    | 16885 | -0.56 | -0.69 | -0.39 | 2.44  | 2.65  | 1.64  | -1.02 | -1.03 | -0.76 | -1.64 | 6.73  | -2.81 |
| MORF15       | 29808  | NM_006259    | 16886 | -1.07 | -1.39 | -1.06 | 1.02  | 0.69  | 1.12  | -0.69 | -1.12 | -0.69 | -3.51 | 2.16  | -2.81 |
| CLP          | 8483   | NM_003613    | 16887 | -0.47 | -0.88 | -0.80 | 1.24  | 1.58  | 1.47  | -0.82 | -1.01 | -0.99 | -2.15 | 4.28  | -2.81 |
| CGN          | 57530  | NM_020770    | 16888 | -0.32 | -0.76 | -0.39 | 1.49  | 1.72  | 0.24  | -0.86 | -1.11 | -0.84 | -1.47 | 3.46  | -2.81 |
| MATN1        | 4146   | NM_002379    | 16889 | -1.11 | -1.16 | -1.06 | 1.11  | 1.06  | 1.11  | -0.87 | -0.80 | -0.80 | -2.73 | 1.24  | -2.81 |
| WDR70        | 55100  | NM_018034    | 16890 | -1.04 | -0.21 | -0.52 | 1.71  | 1.01  | 1.44  | -1.27 | -0.61 | -0.93 | -1.77 | 4.16  | -2.81 |
| DKPFP64005   | 84960  | NM_032120    | 16891 | -0.38 | -0.85 | -0.97 | 0.55  | 0.92  | 1.85  | -0.78 | -0.94 | -1.09 | -2.20 | 3.32  | -2.81 |
| IGF1         | 2359   | NM_00638078  | 16892 | -0.50 | -0.62 | -0.69 | 1.89  | 2.67  | 2.72  | -1.07 | -1.07 | -0.82 | -1.95 | 7.08  | -2.81 |
| DOX1         | 31781  | NM_175066    | 16893 | 0.75  | -0.43 | -0.87 | 0.15  | 0.87  | 1.38  | -0.89 | -0.85 | -1.10 | -2.41 | 2.81  | -2.81 |
| ZPR3         | 5024   | NM_002559    | 16894 | -0.70 | -1.05 | -0.86 | 0.01  | 0.52  | 0.36  | -0.68 | -1.14 | -0.99 | -2.61 | 0.89  | -2.81 |
| PDRN4        | 29951  | NM_013377    | 16895 | 2.30  | -0.46 | 2.04  | 12.61 | 13.23 | 11.39 | -0.86 | -1.10 | -0.85 | -4.80 | 37.01 | -2.81 |
| SUC2B2       | 3117   | NM_020332    | 16896 | -1.15 | -1.30 | -1.26 | -1.12 | -1.24 | -1.49 | -1.12 | -1.24 | -1.49 | -3.71 | 6.07  | -2.81 |
| NXN          | 64399  | NM_022463    | 16897 | -0.94 | -0.92 | -0.17 | 0.52  | 0.29  | 1.20  | -1.00 | -0.94 | -0.87 | -2.03 | 2.01  | -2.81 |
| OSCAM        | 1826   | NM_206887    | 16898 | -0.41 | -0.97 | -0.68 | 2.20  | 0.40  | 0.86  | -0.76 | -1.18 | -0.87 | -2.06 | 1.45  | -2.81 |
| GLP1R        | 5407   | NM_006239    | 16899 | -0.51 | -0.76 | -0.61 | 1.67  | 1.76  | 1.67  | -0.68 | -1.17 | -0.67 | -2.09 | 1.43  | -2.81 |
| IMPA2        | 3613   | NM_014214    | 16900 | -0.84 | -0.75 | -0.73 | 1.61  | 1.88  | 1.77  | -0.95 | -1.02 | -0.85 | -2.31 | 5.26  | -2.82 |
| BTN3A1       | 11119  | NM_194441    | 16901 | -0.58 | -0.83 | -0.56 | 1.60  | 0.91  | 2.76  | -0.73 | -0.97 | -1.11 | -1.97 | 5.27  | -2.82 |
| CTCF3        | 64434  | NM_138490    | 16902 | -1.09 | -1.17 | -1.40 | -0.17 | 0.51  | 0.99  | -0.95 | -0.81 | -0.79 | -3.67 | 0.76  | -2.82 |
| TMEM38B      | 55151  | NM_018112    | 16903 | -0.14 | -0.89 | -1.02 | 1.81  | 1.55  | 0.15  | -0.81 | -1.11 | -0.89 | -2.90 | 3.21  | -2.82 |
| C14ORF87     | 51218  | NM_016417    | 16904 | -0.82 | -1.16 | -1.49 | 0.26  | 0.63  | 0.11  | -0.73 | -1.16 | -0.92 | -3.46 | 1.00  | -2.82 |
| BGN16        | 13041  | NM_008676    | 16905 | -0.90 | -1.04 | -0.83 | 0.97  | -0.16 | 3.18  | -1.05 | -0.80 | -0.97 | -2.77 | 3.99  | -2.82 |
| KOC3         | 863    | NM_003734    | 16906 | -0.90 | -0.61 | -0.20 | 1.09  | 1.09  | 1.09  | -0.88 | -0.88 | -0.88 | -2.81 | 3.82  | -2.82 |
| FLJ2871      | 146279 | NM_144674    | 16907 | -0.86 | -1.15 | -0.85 | 1.95  | 1.14  | 0.10  | -0.91 | -1.15 | -0.75 | -2.86 | 3.19  | -2.82 |
| ABCC2        | 8714   | NM_003786    | 16908 | -0.52 | -0.86 | -0.77 | 2.11  | 1.97  | 3.67  | -0.84 | -0.93 | -1.05 | -2.15 | 7.74  | -2.82 |
| ITIH1        | 474    | NM_005172    | 16909 | -1.21 | -1.09 | -1.06 | 0.66  | 0.36  | 0.66  | -0.95 | -0.88 | -0.95 | -2.42 | 2.34  | -2.82 |
| HGCG.3       | 16408  | NM_001129895 | 16910 | 0.22  | -0.20 | -0.60 | 1.65  | 1.73  | 2.51  | -0.83 | -0.92 | -1.07 | -0.58 | 5.88  | -2.82 |
| FLJ2308      | 79668  | NM_024615    | 16911 | -1.11 | -1.13 | -0.67 | 1.91  | 1.33  | 4.33  | -0.76 | -0.98 | -1.08 | -1.70 | 7.56  | -2.82 |
| GABRE        | 2159   | NM_001961    | 16912 | -1.08 | -1.16 | -1.19 | -0.11 | -0.17 | -0.18 | -0.91 | -1.07 | -1.07 | -3.43 | 0.33  | -2.82 |
| RAE1         | 8480   | NM_003610    | 16913 | -1.14 | -1.07 | -0.89 | -0.13 | 0.24  | -0.07 | -0.93 | -1.01 | -0.88 | -3.09 | 0.04  | -2.82 |
| INA          | 9118   | NM_032727    | 16914 | -0.44 | -0.98 | -1.13 | 0.75  | 1.57  | 1.59  | -0.79 | -0.90 | -1.13 | -2.55 | 3.91  | -2.82 |
| FS1          | 79337  | NM_024333    | 16915 | -0.75 | -0.49 | -0.39 | 2.02  | 1.20  | 1.68  | -1.05 | -0.91 | -0.87 | -1.63 | 4.90  | -2.82 |
| IKARF1B      | 537    | NM_002735    | 16916 | -0.39 | -0.64 | -0.84 | 0.84  | 0.87  | 1.06  | -0.87 | -1.06 | -0.84 | -2.86 | 2.46  | -2.82 |
| HLA-DMA      | 3108   | NM_006120    | 16917 | -0.78 | -0.98 | -1.06 | 1.60  | 1.64  | 2.99  | -0.70 | -1.01 | -1.12 | -2.82 | 6.22  | -2.82 |
| Raptor       | 57521  | NM_020761    | 16918 | -1.49 | -1.06 | -1.24 | 0.80  | 0.21  | 2.21  | -1.17 | -0.43 | -1.23 | -3.79 | 3.22  | -2.82 |
| SPRY7        | 11485  | NM_020761    | 16919 | -0.72 | -0.81 | -0.71 | 1.13  | 1.17  | 1.17  | -1.06 | -0.92 | -0.92 | -1.75 | 1.96  | -2.82 |
| STX38        | 11329  | NM_007271    | 16920 | -1.07 | -0.89 | -1.24 | -0.37 | 0.03  | -0.20 | -0.93 | -0.97 | -0.93 | -3.20 | 4.54  |       |

|             |             |              |       |       |       |       |       |       |       |       |       |       |       |       |       |
|-------------|-------------|--------------|-------|-------|-------|-------|-------|-------|-------|-------|-------|-------|-------|-------|-------|
| LRMT1       | 34730       | NM_178839    | 17003 | -0.53 | -0.73 | -0.83 | 1.07  | 0.82  | 0.85  | -1.03 | -0.84 | -1.00 | -2.09 | 2.74  | -2.88 |
| MMGE42153   | 11377       | NM_00031735  | 17004 | -0.69 | -0.78 | -0.60 | 1.46  | 1.69  | 1.04  | -1.17 | -0.86 | -0.76 | -0.76 | 2.70  | -2.88 |
| ZNF9        | 17652       | NM_00180909  | 17005 | 0.19  | 1.25  | -1.42 | 1.25  | 1.39  | 0.15  | -1.13 | -1.07 | -0.68 | 0.88  | 2.79  | -2.88 |
| CSNK1A1     | 1452        | NM_001892    | 17006 | 0.12  | -0.71 | -0.91 | 2.53  | 3.21  | 2.70  | -0.80 | -1.00 | -1.08 | -1.50 | 8.43  | -2.88 |
| TAF1        | 6890        | NM_000593    | 17007 | -0.97 | -0.78 | -0.65 | 2.07  | 1.10  | 1.23  | -1.21 | -0.79 | -0.88 | -2.41 | 4.41  | -2.88 |
| C14ORF108   | 55746       | NM_018229    | 17008 | 1.23  | 0.83  | 0.68  | 1.62  | 1.10  | 1.03  | -0.58 | -0.43 | -0.10 | 0.74  | 1.08  | -2.88 |
| TOR2        | 10766       | NM_016272    | 17009 | -0.56 | -1.14 | -1.34 | -0.66 | -0.60 | 0.04  | -0.80 | -0.92 | -1.16 | -3.04 | -1.22 | -2.88 |
| GNM         | 3003        | NM_002104    | 17010 | -0.78 | -0.67 | -1.08 | 1.16  | 0.14  | 1.11  | -0.91 | -0.73 | -1.24 | -2.53 | 2.42  | -2.88 |
| 5447        | 21011       | NM_001734    | 17011 | 0.67  | -0.59 | -1.49 | 1.71  | 1.79  | 1.41  | -0.97 | -1.09 | -0.93 | -1.77 | 1.00  | -2.88 |
| FABP3       | 2170        | NM_004102    | 17012 | -0.82 | -0.83 | -0.41 | 1.76  | 1.41  | 1.75  | -0.97 | -0.99 | -0.93 | -2.05 | 4.91  | -2.88 |
| CORL        | 23242       | NM_015198    | 17013 | -0.84 | -0.78 | -0.60 | 1.50  | 1.36  | 1.92  | -0.92 | -0.98 | -0.98 | -2.22 | 4.79  | -2.88 |
| FRS3        | 2642        | NM_001555    | 17014 | -0.69 | -0.89 | -1.02 | 1.82  | 1.02  | 1.80  | -0.84 | -1.05 | -1.02 | -2.32 | 4.46  | -2.88 |
| ZNF137      | 7996        | NM_003438    | 17015 | 0.69  | 1.05  | -0.88 | 0.81  | 1.35  | 0.72  | -0.90 | -1.13 | -0.85 | 0.68  | 2.88  | -2.88 |
| SPN         | 6693        | NM_003123    | 17016 | -0.36 | -0.38 | -0.94 | 2.44  | 2.42  | 2.49  | -0.87 | -0.81 | -1.20 | -1.67 | 7.36  | -2.88 |
| FNT         | 2339        | NM_00108677  | 17017 | -0.91 | -0.94 | -0.65 | 1.01  | 2.57  | 1.18  | -1.09 | -1.09 | -0.71 | -2.51 | 4.56  | -2.88 |
| 1059        | NM_001810   | 17018        | -0.57 | 0.71  | -0.60 | 0.87  | 0.59  | 0.85  | -1.07 | -0.84 | -0.88 | -1.99 | 2.31  | -2.88 |       |
| 445328      | NM_00103702 | 17019        | -1.25 | -1.02 | -1.49 | 2.35  | 1.12  | 1.43  | -1.19 | -0.33 | -1.36 | -3.77 | 4.91  | -2.88 |       |
| LOC131076   | 131076      | NM_001017928 | 17020 | 0.48  | -0.59 | -0.73 | 1.99  | 2.30  | 4.42  | -0.79 | -0.82 | -1.28 | -0.84 | 8.71  | -2.88 |
| DR1         | 1810        | NM_000598    | 17021 | -1.09 | -1.18 | -1.25 | -0.02 | -0.46 | 0.33  | -1.00 | -0.94 | -0.95 | -2.52 | 0.16  | -2.88 |
| YY2         | 404281      | NM_206923    | 17022 | -0.01 | -0.93 | -0.83 | 1.43  | 0.18  | 0.78  | -0.90 | -0.96 | -1.02 | -1.77 | 2.39  | -2.88 |
| SUC23A3     | 151295      | NM_144712    | 17023 | -1.30 | -0.91 | -0.64 | 1.00  | 0.96  | 0.68  | -1.23 | -0.92 | -0.74 | -2.86 | 2.63  | -2.88 |
| DM32        | 1797        | NM_005510    | 17024 | -1.06 | -1.02 | -1.24 | 1.59  | 0.63  | 1.00  | -1.19 | -0.77 | -0.93 | -3.41 | 3.22  | -2.88 |
| EMR2        | 30817       | NM_152918    | 17025 | 0.98  | 0.52  | -1.12 | 1.92  | 1.47  | 1.34  | -1.19 | -0.65 | -1.05 | -2.62 | 4.73  | -2.88 |
| CTL         | 23584       | NM_014312    | 17026 | -1.20 | -1.04 | -1.42 | 0.26  | -0.10 | -0.07 | -1.13 | -0.79 | -0.97 | -3.66 | 0.09  | -2.88 |
| LOC221091   | 221091      | NM_203422    | 17027 | -0.77 | -0.75 | -1.04 | 0.47  | 0.59  | 0.28  | -1.02 | -0.83 | -1.03 | -2.56 | 1.35  | -2.88 |
| TOMM40      | 10652       | NM_006114    | 17028 | -0.80 | -0.95 | -0.85 | 1.08  | 0.37  | 0.50  | -1.00 | -0.97 | -0.90 | -2.61 | 1.95  | -2.88 |
| GNA14       | 9630        | NM_004297    | 17029 | -0.04 | -0.78 | -0.63 | 1.45  | 1.44  | 2.46  | -0.69 | -1.14 | -1.06 | -1.45 | 5.36  | -2.88 |
| TCEAF6      | 158931      | NM_00106938  | 17030 | -1.07 | -0.81 | -0.49 | 1.63  | 0.95  | 0.70  | -1.22 | -0.95 | -0.73 | -2.37 | 3.28  | -2.88 |
| TAC1B1      | 887         | NM_001146    | 17031 | 0.93  | 0.14  | -1.04 | 1.14  | 1.50  | 0.96  | -1.10 | -1.19 | -1.21 | -1.29 | 1.93  | -2.88 |
| LOC10128731 | 16408       | NM_00113469  | 17032 | -1.34 | -1.11 | -1.04 | 1.19  | 1.57  | 2.04  | -1.27 | -1.18 | -1.44 | -3.49 | 4.80  | -2.88 |
| RGP05       | 84220       | NM_032260    | 17033 | -0.83 | -0.66 | -0.61 | 1.29  | 1.88  | 1.15  | -0.92 | -0.91 | -1.07 | -2.10 | 4.31  | -2.88 |
| FLJ3830     | 37504       | NM_001568    | 17034 | -0.49 | -0.15 | -0.60 | 1.80  | 2.69  | 1.02  | -0.89 | -0.67 | -1.02 | -0.70 | 3.34  | -2.88 |
| CRV         | 1398        | NM_005206    | 17035 | 0.85  | 0.84  | -1.64 | 0.44  | -0.09 | 0.33  | -0.89 | -0.67 | -1.33 | 0.68  | 2.89  | -2.88 |
| NRP         | 29959       | NM_013392    | 17036 | -0.76 | -0.62 | -1.06 | 0.88  | 1.32  | 0.76  | -1.07 | -0.81 | -1.01 | -2.44 | 2.96  | -2.88 |
| FLJ2438     | 64926       | NM_025884    | 17037 | 0.36  | -0.83 | -0.79 | 1.41  | 1.36  | 2.71  | -0.49 | -1.16 | -1.24 | -1.27 | 5.28  | -2.88 |
| AMPD2       | 27          | NM_003804    | 17038 | 0.30  | 0.29  | -0.24 | 2.02  | 2.04  | 2.02  | -1.04 | -0.98 | -1.04 | -0.92 | 7.53  | -2.88 |
| TNFSF14     | 8740        | NM_172014    | 17039 | -0.46 | -0.90 | 0.22  | 3.42  | 1.41  | 1.87  | -1.05 | -1.03 | -0.81 | -1.14 | 6.70  | -2.88 |
| PTD04       | 29789       | NM_00101708  | 17040 | -1.33 | -0.73 | -1.23 | 0.01  | 0.79  | 1.15  | -1.03 | -0.87 | -0.99 | -3.29 | 1.95  | -2.88 |
| 1040514     | 912         | NM_014696    | 17041 | -0.54 | 0.17  | -0.14 | 1.14  | 0.57  | 1.14  | -1.03 | -0.74 | -0.82 | -2.45 | 1.45  | -2.88 |
| MT1         | 4520        | NM_005955    | 17042 | -0.84 | 0.96  | -1.01 | 0.66  | 0.29  | 0.72  | -1.09 | -0.85 | -0.96 | -2.82 | 1.67  | -2.88 |
| ARMDC1      | 92714       | NM_152285    | 17043 | -1.09 | -0.83 | -1.11 | 0.63  | 0.26  | 0.47  | -1.14 | -0.72 | -1.03 | -3.03 | 1.36  | -2.88 |
| LOC200874   | 30874       | NM_00103488  | 17044 | -1.16 | -1.00 | -0.89 | -0.49 | -0.18 | -0.49 | -1.16 | -1.09 | -1.10 | -3.23 | 2.36  | -2.88 |
| PLC81       | 23236       | NM_015192    | 17045 | 0.59  | 0.74  | 0.86  | 0.80  | 0.84  | 0.82  | -0.80 | -1.09 | -1.01 | -2.20 | 2.46  | -2.88 |
| HSPC163     | 29097       | NM_014184    | 17046 | -1.32 | -0.85 | -1.06 | 0.02  | 0.65  | 0.86  | -0.98 | -0.99 | -0.94 | -3.23 | 1.52  | -2.88 |
| ASJA1       | 25842       | NM_014034    | 17047 | -1.17 | -0.65 | -0.53 | 1.81  | 2.17  | 2.47  | -0.86 | -1.03 | -1.01 | -1.35 | 6.46  | -2.88 |
| OSRH5       | 40234       | NM_00055515  | 17048 | 0.60  | 0.22  | -0.07 | 2.45  | 2.50  | 2.45  | -0.72 | -0.70 | -1.11 | -0.46 | 9.59  | -2.88 |
| SUC25A4     | 291         | NM_001151    | 17049 | -0.57 | -0.24 | -0.47 | 1.55  | 1.39  | 1.91  | -0.97 | -0.92 | -1.01 | -1.28 | 4.84  | -2.88 |
| ADAM2       | 2515        | NM_001464    | 17050 | -0.89 | -1.11 | -1.16 | 0.28  | 0.71  | 0.72  | -0.90 | -1.05 | -0.95 | -3.16 | 1.71  | -2.88 |
| 106063      | 106063      | NM_000699    | 17051 | -1.40 | -1.29 | -1.60 | 0.72  | 0.49  | 0.72  | -1.60 | -0.79 | -0.97 | -4.62 | 2.12  | -2.88 |
| IARS        | 3376        | NM_002161    | 17052 | -0.50 | -0.98 | -1.07 | 0.72  | 0.43  | 1.22  | -0.79 | -0.98 | -1.13 | -2.56 | 2.37  | -2.88 |
| CDCA2P4     | 23889       | NM_012121    | 17053 | -0.78 | -0.85 | -0.38 | 1.50  | 0.99  | 0.65  | -0.99 | -1.01 | -0.91 | -2.01 | 3.15  | -2.88 |
| BCAL1       | 956         | NM_001667    | 17054 | -0.82 | -0.68 | -0.81 | 1.02  | 0.87  | 1.02  | -0.82 | -0.81 | -0.87 | -2.71 | 1.44  | -2.88 |
| SOX30       | 11063       | NM_007017    | 17055 | 0.84  | 0.80  | -0.64 | 0.43  | 0.92  | 2.01  | -1.03 | -0.99 | -0.89 | -2.29 | 3.36  | -2.88 |
| ANGS        | 197         | NM_016122    | 17056 | -0.63 | -0.54 | -1.25 | 1.07  | 1.62  | 0.53  | -0.78 | -0.97 | -1.16 | -2.42 | 3.21  | -2.88 |
| CENTG1      | 116986      | NM_014770    | 17057 | -1.11 | -0.94 | -1.02 | -0.41 | 0.54  | -0.12 | -1.13 | -1.03 | -0.74 | -3.07 | 0.00  | -2.88 |
| C12ORF121   | 222289      | NM_00110912  | 17058 | 0.12  | 1.02  | -1.04 | 0.68  | 1.15  | 0.67  | -1.07 | -0.99 | -0.92 | -1.29 | 1.07  | -2.88 |
| ORH81       | 241668      | NM_001005203 | 17059 | -1.06 | -1.35 | -0.82 | -0.09 | -0.42 | 0.38  | -0.91 | -1.14 | -0.85 | -3.23 | -0.12 | -2.88 |
| GCL         | 64895       | NM_178439    | 17060 | -1.64 | -1.46 | -1.04 | 1.39  | 1.91  | 1.37  | -1.26 | -0.87 | -1.34 | -4.67 | -0.91 | -2.88 |
| 10661       | 482         | NM_000168    | 17061 | -0.82 | -0.58 | -0.82 | 1.58  | 1.58  | 1.57  | -1.02 | -0.92 | -1.02 | -1.31 | 0.54  | -2.88 |
| BEX1        | 55859       | NM_018476    | 17062 | -0.46 | -0.45 | -0.94 | -0.84 | 2.13  | 2.43  | -0.78 | -1.01 | -1.11 | -1.86 | 5.04  | -2.88 |
| MGC14327    | 94107       | NM_003545    | 17063 | -1.29 | -1.04 | -0.88 | 0.06  | 0.19  | 0.40  | -0.94 | -0.92 | -1.06 | -3.21 | 0.52  | -2.88 |
| WSD081      | 151258      | NM_001528    | 17064 | -0.93 | -1.19 | -1.37 | -0.10 | -0.25 | 0.47  | -0.80 | -1.04 | -0.98 | -4.09 | -0.60 | -2.88 |
| CLK3        | 1398        | NM_001292    | 17065 | 0.22  | 1.00  | -0.48 | 1.93  | 2.11  | 2.35  | -1.11 | -1.01 | -0.79 | -2.30 | 6.40  | -2.88 |
| CKCR6       | 10663       | NM_006564    | 17066 | -1.03 | -0.82 | -0.82 | 0.48  | 0.63  | 0.10  | -1.07 | -0.89 | -0.95 | -2.66 | 1.20  | -2.88 |
| FLJ3821     | 160419      | NM_152589    | 17067 | -1.39 | -1.28 | -1.54 | -0.90 | -0.41 | 0.01  | -0.82 | -0.96 | -1.13 | -4.32 | -1.29 | -2.88 |
| LOC440348   | 440348      | NM_00101859  | 17068 | -0.30 | -1.10 | -1.00 | 0.52  | 1.00  | 1.52  | -1.00 | -1.00 | -1.00 | -2.56 | 1.36  | -2.88 |
| CORF21      | 195827      | NM_153698    | 17069 | -0.67 | -1.25 | -0.73 | 0.56  | 0.52  | 0.46  | -1.02 | -1.04 | -1.04 | -2.65 | 1.53  | -2.88 |
| WBCS22      | 114049      | NM_017528    | 17070 | -1.06 | -0.86 | -0.80 | 0.83  | 1.68  | 0.56  | -1.06 | -1.04 | -0.91 | -2.72 | 3.07  | -2.88 |
| LOC440145   | 440145      | NM_00101446  | 17071 | -0.47 | -0.55 | -1.00 | 1.27  | 1.00  | 1.27  | -1.00 | -1.00 | -1.00 | -2.56 | 0.99  | -2.88 |
| FLJ2569     | 148811      | NM_152491    | 17072 | -0.44 | -1.03 | -0.69 | 1.42  | 1.51  | 1.25  | -0.94 | -1.03 | -0.94 | -2.17 | 4.18  | -2.88 |
| WBCS16      | 81554       | NM_030798    | 17073 | -0.47 | -0.57 | -0.77 | 1.03  | 2.06  | 0.68  | -1.06 | -0.99 | -0.87 | -1.81 | 3.77  | -2.88 |
| LOC255743   | 255743      | NM_001030347 | 17074 | -0.82 | -0.79 | -0.86 | 1.08  | 0.96  | 0.96  | -1.08 | -0.96 | -0.96 | -2.57 | 1.67  | -2.88 |
| FLJ465      | 285180      | NM_198483    | 17075 | 1.13  | 1.14  | -1.22 | 0.50  | 2.15  | 1.55  | -0.88 | -1.09 | -0.94 | -3.49 | 4.21  | -2.88 |
| PANK2       | 80025       | NM_153637    | 17076 | -1.20 | -1.05 | -0.87 | 0.89  | 0.11  | 0.31  | -1.04 | -1.01 | -0.87 | -3.13 | 1.30  | -2.88 |
| SPRNS       | 13005       | NM_008486    | 17077 | -1.10 | -0.88 | -1.21 | 1.23  | 1.08  | 0.60  | -0.99 | -0.96 | -0.96 | -3.20 | 2.94  | -2.88 |
| 10679       | 84324       | NM_030082    | 17078 | 0.28  | 0.72  | 0.40  | 2.02  | 2.39  | 2.02  | -0.98 | -0.99 | -0.98 | -2.40 | 8.54  | -2.88 |
| ZNF02       | 25846       | NM_034000    | 17079 | 0.73  | -0.44 | -0.28 | 2.34  | 3.59  | 3.37  | -0.62 | -1.12 | -1.17 | 0.01  | 9.11  | -2.88 |
| LOC29664004 | 296640      | NM_015420    | 17080 | -1.51 | -1.33 | -1.59 | -0.19 | -0.39 | -0.36 | -1.03 | -0.91 | -0.96 | -4.43 | 0.94  | -2.88 |
| SLC16A5     | 9120        | NM_003694    | 17081 | 0.18  | 0.55  | 0.34  | 1.51  | 1.51  | 1.51  | -0.19 | -0.24 | -0.24 | -1.07 | 1.07  | -2.88 |
| DMT1        | 1786        | NM_001379    | 17082 | -1.09 | -0.71 | -0.93 | 0.71  | 0.02  | 0.42  |       |       |       |       |       |       |

|            |           |              |       |       |       |       |       |       |       |         |       |       |       |       |       |
|------------|-----------|--------------|-------|-------|-------|-------|-------|-------|-------|---------|-------|-------|-------|-------|-------|
| PHACTR4    | 65979     | NM_023923    | 17165 | -1.07 | -1.00 | -0.34 | 0.80  | 0.45  | 0.52  | -1.11   | -1.01 | -0.85 | -2.41 | 1.77  | -2.96 |
| 27074      | NM_001398 | 17166        | -0.76 | -0.53 | -0.57 | 0.86  | 2.42  | 0.82  | 2.83  | -0.82   | -0.80 | -1.26 | -2.26 | 1.63  | -1.96 |
| MAP1D      | 264042    | NM_199227    | 17167 | -1.13 | -0.78 | -0.86 | 0.19  | 1.55  | 1.48  | -1.10   | -0.86 | -1.00 | -2.77 | 3.21  | -2.96 |
| PTPNM1     | 9600      | NM_004910    | 17168 | -0.46 | -0.87 | -0.73 | 2.61  | 2.51  | 2.23  | -0.86   | -1.13 | -0.97 | -2.05 | 7.35  | -2.96 |
| NCDA1      | 8202      | NM_006354    | 17169 | -1.26 | -0.80 | -1.42 | 1.67  | 0.83  | 1.56  | -0.88   | -0.96 | -1.32 | -2.49 | 4.06  | -2.96 |
| ZNF235     | 7776      | NM_001345    | 17170 | -0.15 | -0.42 | -0.34 | 2.08  | 4.68  | 3.69  | -0.86   | -1.04 | -0.95 | -0.96 | 12.82 | -2.97 |
| ZNF38      | 7582      | NM_006955    | 17171 | -1.20 | -1.21 | -1.10 | 0.44  | 0.17  | 0.13  | -1.11   | -1.11 | -0.74 | -3.51 | 0.75  | -2.97 |
| FLU5909    | 126432    | NM_198445    | 17172 | -0.95 | -0.80 | -0.61 | 0.96  | 0.89  | 1.22  | -1.10   | -0.81 | -1.05 | -2.36 | 3.07  | -2.97 |
| ZFNH84     | 2744      | NM_001605    | 17173 | 0.94  | 0.78  | 0.47  | 1.28  | 1.28  | 1.28  | -1.21   | -2.69 | -1.27 | -2.69 | 1.43  | -2.97 |
| PCBD       | 5092      | NM_001001939 | 17174 | -1.11 | -0.57 | -0.82 | 1.07  | 0.67  | 1.03  | -1.16   | -0.97 | -0.84 | -2.49 | 2.78  | -2.97 |
| ALOX12     | 239       | NM_000097    | 17175 | -0.93 | -0.50 | -0.20 | 2.01  | 3.96  | 2.18  | -1.07   | -1.06 | -0.84 | -1.64 | 8.14  | -2.97 |
| ITIH1      | 5860      | NM_001625    | 17176 | -0.86 | -0.82 | -0.65 | 1.08  | 1.08  | 1.08  | -1.02   | -1.03 | -0.52 | -2.56 | 6.36  | -2.97 |
| FLI12975   | 79807     | NM_024809    | 17177 | 0.90  | -0.86 | -0.86 | 0.86  | 0.86  | 0.66  | -0.98   | -1.00 | -0.99 | -2.97 | 2.40  | -2.97 |
| PLEKHG3    | 26930     | NM_015549    | 17178 | -0.88 | -1.18 | -0.45 | 0.99  | 0.64  | 2.04  | -0.96   | -0.91 | -1.10 | -2.31 | 3.68  | -2.97 |
| ACD2       | 50        | NM_001998    | 17179 | -0.68 | -0.05 | -1.04 | 1.90  | 2.18  | 1.85  | -0.97   | -0.94 | -1.06 | -1.95 | 5.93  | -2.97 |
| NR1F60     | 90338     | NM_033288    | 17180 | -0.71 | -0.52 | -1.01 | 2.01  | 1.32  | 1.28  | -0.99   | -0.90 | -1.07 | -2.25 | 4.61  | -2.97 |
| GRP20      | 2843      | NM_005293    | 17181 | -1.19 | -1.33 | -1.50 | 0.57  | 0.40  | 0.31  | -0.85   | -0.85 | -1.27 | -4.01 | 1.28  | -2.97 |
| PTGE22     | 80442     | NM_198940    | 17182 | -0.85 | -0.59 | -1.10 | 0.85  | 1.88  | 0.74  | -0.98   | -0.89 | -1.10 | -2.54 | 3.48  | -2.97 |
| NFY2       | 4885      | NM_002223    | 17183 | -0.95 | -1.06 | -0.52 | 0.37  | 0.74  | 0.95  | -0.95   | -0.93 | -1.10 | -2.92 | 2.06  | -2.97 |
| EPH8A      | 2050      | NM_004444    | 17184 | -1.02 | -1.01 | -0.67 | 1.31  | 1.79  | 1.46  | -1.11   | -0.84 | -1.03 | -2.69 | 4.55  | -2.97 |
| MGC20419   | 112970    | NM_138417    | 17185 | -1.04 | -0.89 | -1.19 | 0.22  | 0.41  | 0.44  | -1.10   | -0.89 | -0.98 | -3.12 | 1.07  | -2.97 |
| MGC12997   | 128238    | NM_144626    | 17186 | -0.80 | -0.99 | -1.08 | 1.42  | 1.82  | 0.49  | -0.87   | -1.14 | -0.96 | -2.86 | 3.74  | -2.98 |
| IL178      | 27190     | NM_014443    | 17187 | -0.90 | -0.89 | -0.18 | 2.04  | 1.37  | 1.26  | -1.03   | -1.00 | -0.86 | -1.97 | 4.67  | -2.98 |
| DYRK2      | 8445      | NM_003583    | 17188 | -0.38 | -0.63 | -0.92 | 1.47  | 2.25  | 2.26  | -0.80   | -0.92 | -1.25 | -1.94 | 5.98  | -2.98 |
| RAMP1      | 10558     | NM_005856    | 17189 | -1.62 | -1.21 | -1.70 | -0.02 | -0.08 | -0.57 | -1.23   | -0.51 | -1.23 | -4.53 | -0.67 | -2.98 |
| RANGAP1    | 5905      | NM_002883    | 17190 | -0.96 | -0.52 | -0.82 | 1.87  | 1.69  | 2.04  | -1.11   | -0.77 | -1.10 | -2.30 | 5.60  | -2.98 |
| CDM8       | 81533     | NM_030790    | 17191 | -0.91 | -1.34 | -0.05 | 1.04  | 2.17  | 1.82  | -1.03   | -1.49 | -0.46 | -3.30 | 5.03  | -2.98 |
| LMTK2      | 22853     | NM_014916    | 17192 | -1.00 | -0.91 | -0.93 | 0.37  | 0.95  | 1.09  | -0.95   | -1.15 | -0.89 | -2.83 | 2.41  | -2.98 |
| PTFAP18    | 30667     | NM_098606    | 17193 | -0.06 | -0.23 | -0.75 | 1.27  | 2.71  | 2.07  | -1.13   | -1.07 | -1.10 | -0.92 | 5.88  | -2.98 |
| COL27A1    | 85301     | NM_032888    | 17194 | -0.70 | -1.03 | -1.43 | 0.38  | 0.19  | 0.48  | -0.76   | -0.95 | -1.27 | -3.16 | 1.06  | -2.98 |
| MPEP       | 4285      | NM_005932    | 17195 | -0.41 | -1.02 | -1.25 | 0.82  | 1.42  | 2.00  | -0.61   | -1.07 | -1.31 | -2.68 | 4.24  | -2.98 |
| FAM208B    | 991       | NM_001864    | 17196 | -1.05 | -1.26 | -0.99 | 1.30  | 0.87  | 1.58  | -0.87   | -1.30 | -1.05 | -3.41 | 3.32  | -2.98 |
| RP9D       | 10556     | NM_006413    | 17197 | -0.93 | -1.11 | -0.96 | 0.24  | 2.25  | 2.40  | -0.51   | -1.24 | -1.24 | -4.04 | 5.08  | -2.99 |
| ADAMT520   | 80070     | NM_175851    | 17198 | -1.80 | -1.40 | -0.72 | 2.43  | 1.94  | 2.43  | -0.98   | -1.19 | -0.82 | -2.92 | 6.80  | -2.99 |
| PPP2R2A    | 5520      | NM_002717    | 17199 | -1.04 | -0.43 | -0.53 | 2.27  | 1.61  | 2.68  | -1.18   | -0.75 | -1.05 | -2.11 | 6.56  | -2.99 |
| NCAM1500   | 155185    | NM_001493    | 17200 | -1.37 | -1.38 | -1.35 | 1.37  | 1.38  | 1.35  | -1.37   | -0.87 | -0.88 | -2.10 | 6.69  | -2.99 |
| C21ORF91   | 54149     | NM_001100421 | 17201 | -0.50 | -1.10 | -0.82 | 1.76  | 1.19  | 0.90  | -0.92   | -1.19 | -0.88 | -2.42 | 3.85  | -2.99 |
| RBP85      | 5929      | NM_005057    | 17202 | -0.21 | -0.24 | -0.46 | 2.14  | 1.65  | 1.87  | -0.98   | -0.82 | -1.18 | -0.92 | 5.66  | -2.99 |
| ITIH2L     | 4917      | NM_001881    | 17203 | -0.97 | -1.47 | -1.17 | 0.67  | 1.23  | 1.67  | -1.07   | -1.23 | -1.07 | -3.63 | 3.97  | -2.99 |
| PAF53      | 64425     | NM_022490    | 17204 | -0.74 | -0.91 | -0.93 | 1.31  | 1.42  | 1.34  | -1.02   | -1.04 | -0.95 | -2.58 | 4.07  | -2.99 |
| PTFRM1     | 10531     | NM_014889    | 17205 | -1.03 | -0.72 | -0.99 | 1.17  | 2.11  | 1.26  | -1.01   | -0.96 | -1.02 | -2.75 | 4.55  | -2.99 |
| TRNA3      | 3798      | NM_0012232   | 17206 | -0.06 | -0.67 | -0.99 | 1.57  | 2.03  | 0.95  | -1.02   | -1.02 | -1.02 | -2.76 | 4.55  | -2.99 |
| TRNA43     | 12946     | NM_138800    | 17207 | -1.06 | -0.88 | -0.67 | 1.76  | 1.62  | 2.24  | -0.98   | -0.99 | -1.02 | -2.60 | 5.62  | -2.99 |
| PTPN6      | 5777      | NM_080548    | 17208 | -0.91 | -1.16 | -1.30 | 0.21  | -0.43 | 0.36  | -1.00   | -0.91 | -1.08 | -3.37 | 0.14  | -2.99 |
| ONC2N1     | 79473     | NM_00103913  | 17209 | -0.67 | -0.96 | -1.23 | 1.14  | 1.79  | 0.96  | -0.87   | -1.19 | -0.93 | -2.87 | 3.88  | -2.99 |
| CNBP1      | 8473      | NM_032459    | 17210 | -0.84 | -1.14 | -1.21 | 0.41  | 0.90  | 1.40  | -0.90   | -1.07 | -1.03 | -2.10 | 3.31  | -2.99 |
| NALP14     | 388233    | NM_176822    | 17211 | -1.18 | -0.59 | -0.93 | 0.85  | 1.36  | 0.75  | -1.07   | -0.85 | -1.08 | -2.69 | 2.96  | -2.99 |
| HCL1       | 3059      | NM_005335    | 17212 | -1.09 | -0.25 | -1.14 | 1.16  | 1.96  | 1.55  | -0.96   | -0.95 | -1.08 | -2.38 | 4.67  | -2.99 |
| GLSPT      | 4912      | NM_001947    | 17213 | -1.26 | -1.14 | -0.48 | 1.14  | 1.14  | 1.14  | -1.04   | -0.92 | -1.14 | -2.99 | 1.56  | -2.99 |
| TMEM4      | 56937     | NM_199170    | 17214 | -1.10 | -0.53 | -1.39 | 0.90  | 1.96  | 2.12  | -1.08   | -0.69 | -1.22 | -3.02 | 4.98  | -2.99 |
| MGC10372   | 92749     | NM_145038    | 17215 | -1.14 | -1.06 | -1.30 | -0.01 | 0.34  | 0.95  | -0.95   | -0.93 | -1.12 | -3.50 | 1.28  | -2.99 |
| TRIN       | 10345     | NM_000473    | 17216 | -0.44 | -1.00 | -1.25 | 1.17  | 0.75  | 1.58  | -0.87   | -1.08 | -1.10 | -2.70 | 5.51  | -2.99 |
| EP5L5      | 2080      | NM_001981    | 17217 | -1.02 | -1.21 | -0.12 | 0.52  | 1.17  | 0.76  | -0.97   | -1.28 | -0.75 | -2.11 | 3.45  | -2.99 |
| NBRP2      | 340371    | NM_178564    | 17218 | -1.43 | -1.19 | -1.52 | 3.11  | 1.43  | 2.06  | -1.31   | -0.54 | -1.14 | -4.13 | 6.60  | -3.00 |
| PTK2B      | 2385      | NM_173175    | 17219 | -1.13 | -1.14 | -1.39 | 0.02  | -0.03 | -0.28 | -0.82   | -1.10 | -1.08 | -1.66 | -0.27 | -3.00 |
| SEPRN87    | 8170      | NM_000004047 | 17220 | -0.83 | -0.83 | -0.77 | 0.83  | 0.83  | 0.83  | -0.95   | -1.07 | -0.93 | -2.43 | 2.73  | -3.00 |
| CHRM1      | 1128      | NM_000738    | 17221 | -0.97 | -1.01 | -1.05 | 2.09  | 2.04  | 3.33  | -0.86   | -0.97 | -1.17 | -3.03 | 7.25  | -3.00 |
| LOC91153   | 91353     | NM_001013618 | 17222 | -0.80 | -1.26 | -0.99 | 1.86  | 1.75  | 1.55  | -0.93   | -0.98 | -1.09 | -3.04 | 5.16  | -3.00 |
| LOC4016407 | 40167     | NM_0016407   | 17223 | -0.96 | -1.10 | -1.15 | 0.95  | 0.99  | 1.09  | -1.01   | -0.99 | -1.09 | -3.17 | 2.03  | -3.00 |
| FLI34306   | 374819    | NM_199134    | 17224 | -1.05 | -1.40 | -0.77 | 0.00  | -0.12 | 0.46  | -0.89   | -1.22 | -0.89 | -3.23 | 1.34  | -3.00 |
| ASB1       | 51665     | NM_001610    | 17225 | -1.29 | -1.28 | -1.42 | -0.36 | 0.08  | -0.13 | -0.96   | -0.90 | -1.14 | -3.99 | -0.40 | -3.00 |
| ESLORF35   | 8157      | NM_001077350 | 17226 | -1.12 | -1.24 | -1.55 | -0.10 | 0.26  | 0.89  | -0.80   | -1.22 | -0.89 | -3.91 | 2.29  | -3.00 |
| FLI3799    | 158955    | NM_152571    | 17227 | -1.38 | -1.55 | -1.71 | 0.61  | -0.13 | -0.28 | -0.72   | -1.14 | -1.15 | -4.64 | 0.20  | -3.01 |
| LOC38328   | 38328     | NM_178172    | 17228 | -1.34 | -1.49 | -1.30 | 0.15  | 0.87  | 1.24  | -0.96   | -0.90 | -1.14 | -4.13 | 2.26  | -3.01 |
| RAD51      | 51655     | NM_016884    | 17229 | -0.21 | -1.22 | -0.41 | 0.95  | 1.08  | 1.63  | -0.73   | -1.21 | -1.07 | -1.84 | 3.86  | -3.01 |
| TRMT3      | 37529     | NM_198204    | 17230 | -1.08 | -0.41 | -0.84 | 0.46  | 0.46  | 0.46  | -1.07   | -0.87 | -1.08 | -3.23 | 3.48  | -3.01 |
| YFP1       | 54432     | NM_018982    | 17231 | -1.21 | -1.36 | -0.89 | 0.43  | 1.47  | 0.42  | -1.10   | -1.25 | -0.65 | -3.45 | 2.32  | -3.01 |
| KMA1683    | 80726     | NM_025249    | 17232 | -0.92 | -1.13 | -1.01 | 0.52  | 0.54  | 0.40  | -1.06   | -1.14 | -0.81 | -3.06 | 1.46  | -3.01 |
| CR2        | 1081      | NM_00100820  | 17233 | -0.80 | -0.79 | -1.03 | 1.31  | 1.41  | 1.31  | -1.03   | -0.99 | -1.03 | -2.92 | 2.94  | -3.01 |
| HNRP0L     | 9987      | NM_013172    | 17234 | -0.53 | -0.69 | -1.13 | 1.81  | -0.33 | 1.44  | -1.06   | -1.69 | -1.26 | -2.35 | 2.92  | -3.01 |
| MAPK30     | 5602      | NM_138981    | 17235 | -0.81 | -1.08 | -0.90 | 1.54  | 1.06  | 0.25  | -1.08   | -1.15 | -0.78 | -2.79 | 2.84  | -3.01 |
| FLI38968   | 120574    | NM_0013116   | 17236 | -0.68 | -0.65 | -0.89 | 1.08  | 1.08  | 1.08  | -1.08   | -0.90 | -1.06 | -2.23 | 3.67  | -3.01 |
| CLAR1      | 719       | NM_004054    | 17237 | -0.86 | -0.79 | -1.27 | 0.41  | 0.95  | 1.31  | -0.86   | -1.00 | -1.14 | -2.67 | 2.67  | -3.01 |
| PCDH81     | 29930     | NM_013340    | 17238 | -0.99 | -1.07 | -1.19 | 1.46  | 2.20  | 1.41  | -0.93   | -0.97 | -1.11 | -3.26 | 5.07  | -3.01 |
| CHST11     | 50513     | NM_018413    | 17239 | -0.56 | -0.92 | -0.77 | 0.41  | 0.63  | 0.97  | -0.93   | -1.11 | -0.96 | -2.25 | 2.01  | -3.01 |
| IGCTN      | 33930     | NM_198492    | 17240 | -1.26 | -1.02 | -1.02 | 1.63  | 1.63  | 1.63  | -1.02   | -1.02 | -1.02 | -2.99 | 0.95  | -3.01 |
| MHFAS1     | 92518     | NM_004225    | 17241 | -1.26 | -0.76 | -0.57 | 0.92  | 0.79  | 1.60  | -1.22   | -0.91 | -0.89 | -2.58 | 3.31  | -3.01 |
| GBF1       | 8729      | NM_004193    | 17242 | -1.27 | -1.28 | -0.67 | 2.05  | 0.48  | 1.16  | -1.10   | -1.33 | -0.57 | -2.67 | 3.69  | -3.01 |
| ITIH5      | 1487      | NM_00101881  | 17243 | -0.68 | -0.88 | -1.15 | 1.15  | 1.15  | 1.15  | -1.15   | -0.88 | -1.15 | -2.87 | 3.45  | -3.01 |
| EPH4B      | 1975      | NM_001417    | 17244 | -0.81 | -0.79 | -0.79 | 1.42  | 0.25  | 1.20  | -1.02</ |       |       |       |       |       |

|              |        |              |       |       |       |       |       |       |       |       |       |       |       |       |       |
|--------------|--------|--------------|-------|-------|-------|-------|-------|-------|-------|-------|-------|-------|-------|-------|-------|
| FBK011       | 80204  | NM_012167    | 17327 | -0.98 | -1.09 | -0.64 | 3.50  | 4.30  | 2.75  | -1.04 | -1.18 | 0.84  | -2.71 | 10.55 | -3.06 |
| AV11         | 6480   | NM_002865    | 17328 | -0.89 | -1.00 | -0.99 | 2.42  | 0.66  | 0.99  | -0.98 | -1.01 | -1.02 | -0.78 | 1.25  | -3.06 |
| MG-6         | 54206  | NM_018948    | 17329 | 1.49  | 1.04  | -1.87 | -0.19 | -0.23 | -0.93 | -1.12 | -0.89 | -1.05 | -2.79 | 1.25  | -3.06 |
| DYRKA        | 8798   | NM_003845    | 17330 | -0.57 | -0.96 | -0.89 | 1.83  | 1.95  | 2.31  | -0.99 | -0.92 | -1.16 | -2.42 | 6.09  | -3.06 |
| DPSL5        | 56898  | NM_020134    | 17331 | -1.79 | -0.95 | -0.77 | 1.04  | 0.87  | 2.48  | -1.04 | -0.97 | -1.06 | -2.51 | 4.39  | -3.06 |
| ASGPT13      | 27328  | NM_019390    | 17332 | -0.30 | -1.03 | -1.03 | 1.06  | 0.95  | 1.35  | -1.05 | -1.01 | -1.05 | -3.13 | 2.74  | -3.06 |
| SH3BP1       | 23616  | NM_018957    | 17333 | -0.76 | -0.64 | -0.82 | 1.19  | 0.81  | 1.67  | -1.38 | -0.68 | -1.00 | -2.83 | 3.67  | -3.06 |
| ADH4         | 127    | NM_000070    | 17334 | -1.05 | -1.63 | -1.66 | 0.19  | 2.88  | 1.41  | -0.39 | -1.16 | -1.51 | -4.34 | 4.49  | -3.06 |
| LOC38324     | 33952  | NM_02012756  | 17335 | -1.17 | -0.81 | -1.01 | 0.92  | 0.91  | 1.35  | -1.18 | -0.82 | -1.09 | -2.34 | 1.90  | -3.07 |
| SNHG1        | 54861  | NM_018276    | 17336 | -0.81 | -0.64 | -1.09 | 2.16  | 2.78  | 2.02  | -0.87 | -1.05 | -1.15 | -2.04 | 6.96  | -3.07 |
| PBYN         | 5173   | NM_024411    | 17337 | -0.05 | -0.75 | -1.04 | 1.90  | 1.18  | 0.99  | -0.79 | -1.10 | -1.18 | -1.83 | 4.06  | -3.07 |
| CSDPF10      | 647    | NM_001700    | 17338 | -1.36 | -1.15 | -1.12 | 1.30  | 1.55  | 1.66  | -1.06 | -0.86 | -1.17 | -1.63 | 4.98  | -3.07 |
| RBMY15       | 378950 | NM_00100618  | 17339 | -0.54 | -1.67 | -1.23 | 1.79  | 0.03  | 1.59  | 0.84  | -1.18 | -1.05 | -3.44 | 3.41  | -3.07 |
| TACTD2       | 4070   | NM_002353    | 17340 | -0.47 | -0.49 | -1.13 | 1.55  | 1.81  | 1.94  | -0.89 | -1.00 | -1.18 | -2.09 | 5.30  | -3.07 |
| CC2          | 10576  | NM_006431    | 17341 | -1.85 | -1.30 | -1.50 | 1.49  | 1.34  | 3.23  | -0.88 | -0.97 | -1.22 | -4.26 | 6.06  | -3.07 |
| HNRH2        | 3188   | NM_00102393  | 17342 | -0.66 | -1.37 | -1.26 | 0.58  | 0.17  | 0.41  | -0.86 | -1.13 | -1.08 | -3.29 | 1.17  | -3.07 |
| KIAA1582     | 57690  | NM_018996    | 17343 | -0.70 | -0.74 | 0.47  | 4.07  | 3.57  | 3.83  | -1.06 | -1.08 | -0.92 | -0.97 | 11.87 | -3.07 |
| PKM          | 253430 | NM_152230    | 17344 | -0.84 | -1.11 | -0.96 | 0.69  | 0.66  | 0.59  | -0.97 | -1.11 | -0.99 | -2.90 | 1.93  | -3.07 |
| NANOS1       | 340759 | NM_00100553  | 17345 | -0.54 | -0.44 | -0.74 | 2.89  | 2.28  | 2.67  | -0.81 | -1.11 | -1.15 | -3.72 | 7.85  | -3.07 |
| JUNO         | 3727   | NM_005354    | 17346 | -1.07 | -1.21 | -1.30 | 0.71  | 0.19  | 0.39  | -1.00 | -1.07 | -1.01 | -3.58 | 1.29  | -3.07 |
| OMK52        | 219431 | NM_00104059  | 17347 | -1.34 | -1.51 | -1.59 | 0.54  | -0.57 | -0.24 | -0.97 | -0.97 | -1.13 | -4.44 | -1.35 | -3.07 |
| RP11-591.3   | 401541 | NM_00102267  | 17348 | -1.45 | -1.45 | -1.54 | 0.49  | -0.23 | 0.66  | -1.25 | -0.92 | -0.90 | -4.44 | -0.40 | -3.07 |
| CHRNA9       | 55584  | NM_017581    | 17349 | 0.93  | 0.45  | -0.86 | 1.64  | 1.35  | 2.01  | -1.13 | -0.81 | -1.13 | -2.24 | 5.00  | -3.07 |
| GHRH2        | 2797   | NM_178332    | 17350 | -0.82 | -0.45 | -1.08 | 2.50  | 1.97  | 1.51  | -1.15 | -0.82 | -1.11 | -2.35 | 5.99  | -3.07 |
| GF114        | 22138  | NM_153837    | 17351 | -1.22 | -1.32 | -1.10 | 0.91  | 0.42  | -0.22 | -1.16 | -1.22 | -0.60 | -3.64 | 1.12  | -3.07 |
| HOU1         | 1052   | NM_006389    | 17352 | -1.10 | -0.80 | -1.01 | 1.42  | 1.23  | 0.41  | -0.96 | -1.02 | -1.10 | -2.92 | 3.06  | -3.07 |
| FLJ2614      | 203523 | NM_152695    | 17353 | -1.06 | -0.89 | -0.76 | 0.85  | 2.08  | 1.39  | -1.10 | -1.06 | -0.92 | -2.70 | 4.32  | -3.07 |
| RAB39B       | 116442 | NM_171998    | 17354 | -0.53 | -0.99 | -1.14 | 1.33  | 0.33  | 1.84  | -0.79 | -1.00 | -1.29 | -2.66 | 3.49  | -3.08 |
| LOC38088     | 5695   | NM_00107666  | 17355 | -0.12 | -1.62 | -1.00 | 0.79  | 0.82  | 2.17  | -0.79 | -1.15 | -1.11 | -1.75 | 6.64  | -3.08 |
| GNAL         | 6774   | NM_002071    | 17356 | -1.12 | -0.76 | -1.09 | 1.12  | 0.82  | 0.75  | -1.23 | -0.79 | -1.06 | -2.97 | 2.69  | -3.08 |
| LOC409F102   | 55951  | NM_199043    | 17357 | -0.99 | -1.01 | -0.82 | 0.33  | 1.14  | 0.39  | -1.11 | -1.07 | -0.90 | -2.82 | 1.85  | -3.08 |
| NDOR1        | 27159  | NM_016434    | 17358 | -1.49 | -1.28 | -1.47 | 1.13  | 0.62  | -1.13 | -0.62 | -1.11 | -0.84 | -4.35 | 1.61  | -3.08 |
| GTO2         | 72844  | NM_00112937  | 17359 | 0.73  | 0.53  | 0.35  | 2.61  | 2.04  | 2.70  | -1.32 | -0.97 | -0.79 | -0.91 | 7.35  | -3.08 |
| NTS          | 8344   | NM_012188    | 17360 | -1.15 | -1.20 | -1.57 | -0.55 | -0.05 | -0.25 | -0.89 | -1.03 | -1.16 | -3.93 | 0.85  | -3.08 |
| WR5B         | 54554  | NM_019269    | 17361 | -0.61 | -1.22 | -1.45 | 1.44  | 0.48  | 0.90  | -1.00 | -1.08 | -1.10 | -3.28 | 2.81  | -3.08 |
| DACH2        | 117154 | NM_019621    | 17362 | -0.46 | -0.87 | -0.69 | 0.69  | 0.82  | 0.62  | -1.03 | -1.02 | -0.99 | -2.82 | 1.39  | -3.08 |
| CSNK1G1      | 53944  | NM_022048    | 17363 | -0.99 | -0.99 | -1.30 | 0.66  | 0.82  | 1.20  | -0.96 | -0.82 | -1.30 | -3.27 | 2.69  | -3.08 |
| VERX2        | 27287  | NM_014648    | 17364 | -0.94 | -1.10 | -1.36 | 0.52  | 0.02  | 0.38  | -0.91 | -1.06 | -1.12 | -3.40 | 0.93  | -3.08 |
| TT365        | 5116   | NM_001020    | 17365 | -1.00 | -1.05 | -1.00 | 1.14  | 0.95  | 1.08  | -1.14 | -0.95 | -1.00 | -2.56 | 3.08  | -3.08 |
| ADAM15       | 8751   | NM_207191    | 17366 | -1.45 | -1.36 | -1.52 | -0.05 | 0.27  | -0.84 | -1.05 | -1.00 | -1.03 | -4.32 | 0.63  | -3.08 |
| SEMA6D       | 80031  | NM_024966    | 17367 | -0.84 | -1.12 | -0.57 | 1.76  | 0.34  | 1.88  | -1.17 | -0.97 | -0.89 | -2.53 | 9.98  | -3.08 |
| PPP1R4B      | 2647   | NM_001869    | 17368 | -1.27 | -1.21 | -1.41 | -0.41 | -0.41 | -0.41 | -1.27 | -1.21 | -1.41 | -3.89 | -0.72 | -3.08 |
| SCN11        | 79005  | NM_024041    | 17369 | -1.02 | 0.79  | -1.56 | 0.56  | 0.68  | 0.69  | -0.88 | -0.86 | -1.25 | -1.93 | 1.93  | -3.08 |
| ING5         | 84289  | NM_032329    | 17370 | -1.29 | -0.48 | -0.54 | 0.89  | 1.30  | 0.73  | -1.30 | -0.96 | -0.83 | -2.31 | 2.92  | -3.08 |
| DKLL1-PENDIN | 27120  | NM_014419    | 17371 | -0.99 | -1.32 | -1.74 | 1.40  | -0.35 | 0.09  | -0.97 | -1.05 | -1.07 | -3.99 | 1.13  | -3.09 |
| LOC38088     | 39068  | NM_00108372  | 17372 | -0.85 | -1.04 | -0.93 | 0.42  | -1.02 | -0.88 | -0.96 | -1.08 | -1.13 | -3.18 | 2.38  | -3.09 |
| LOC790955    | 790955 | NM_00108372  | 17373 | -1.12 | -1.18 | -1.06 | -0.22 | 0.49  | 0.56  | -0.90 | -1.13 | -1.05 | -3.35 | 0.83  | -3.09 |
| CT           | 717    | NM_000063    | 17374 | -0.87 | -1.04 | -1.14 | 0.29  | 0.66  | 0.19  | -0.96 | -1.01 | -1.12 | -3.05 | 1.14  | -3.09 |
| GSTL4        | 9127   | NM_191217    | 17375 | 1.47  | 1.43  | -1.49 | 0.42  | 0.42  | 0.42  | -1.08 | -0.95 | -1.09 | -4.40 | 0.40  | -3.09 |
| GF119        | 139760 | NM_178471    | 17376 | -0.95 | -1.05 | -1.04 | 0.92  | 1.47  | 0.09  | -0.97 | -1.14 | -0.98 | -3.04 | 2.47  | -3.09 |
| ZNF4         | 9889   | NM_014688    | 17377 | -0.89 | -0.96 | -1.26 | 0.51  | 2.22  | 1.46  | -0.86 | -1.07 | -1.16 | -3.11 | 4.19  | -3.09 |
| ARHDS        | 51899  | NM_023006    | 17378 | -1.25 | -0.95 | -1.03 | 0.40  | 0.31  | 1.04  | -1.06 | -1.04 | -1.06 | -3.22 | 1.75  | -3.09 |
| NELF         | 26012  | NM_001130971 | 17379 | 0.98  | -1.26 | -1.45 | -0.21 | -0.66 | 0.59  | -0.67 | -1.32 | -1.10 | -3.07 | -0.25 | -3.09 |
| FLJ25889     | 347516 | NM_198512    | 17380 | -0.86 | -0.89 | -0.77 | 0.85  | 0.71  | 1.10  | -0.94 | -1.06 | -1.09 | -2.52 | 2.65  | -3.09 |
| MDJDC        | 22157  | NM_004241    | 17381 | -0.97 | -0.83 | -0.74 | 1.85  | 1.36  | 1.47  | -1.20 | -0.95 | -0.95 | -2.55 | 4.68  | -3.09 |
| RPN1B        | 15201  | NM_00101237  | 17382 | -0.90 | -1.25 | -1.07 | 0.92  | 0.87  | 1.10  | -0.87 | -1.10 | -1.12 | -3.22 | 3.70  | -3.09 |
| ENO1         | 2023   | NM_001428    | 17383 | -1.26 | -1.28 | -1.46 | -0.06 | -0.04 | 0.23  | -0.99 | -1.10 | -1.10 | -4.00 | 0.14  | -3.09 |
| CFRP10       | 55845  | NM_018462    | 17384 | -1.43 | -0.98 | -0.70 | 1.78  | 2.04  | 1.77  | -1.02 | -1.15 | -0.91 | -2.10 | 5.58  | -3.10 |
| LOC381923    | 30752  | NM_00101897  | 17385 | -0.98 | -0.83 | -0.64 | 0.64  | 0.64  | 0.64  | -1.27 | -1.02 | -0.98 | -3.62 | 1.65  | -3.10 |
| CORF35       | 79184  | NM_00101855  | 17386 | -0.93 | -0.88 | 0.00  | 1.40  | 0.81  | 3.59  | -1.04 | -0.93 | -1.12 | -3.82 | 5.80  | -3.10 |
| STGAL4       | 6484   | NM_006278    | 17387 | -0.87 | -0.74 | -0.97 | 1.45  | 0.82  | 1.00  | -1.09 | -1.02 | -1.09 | -2.58 | 3.33  | -3.10 |
| LOC380745    | 34035  | NM_001017924 | 17388 | -0.92 | -0.69 | -0.55 | 1.68  | 2.95  | 1.39  | -1.14 | -1.15 | -0.93 | -1.66 | 6.23  | -3.10 |
| PEP2         | 84528  | NM_024948    | 17389 | -1.32 | -1.17 | -0.77 | 1.92  | 1.51  | 1.34  | -0.95 | -1.27 | -0.88 | -2.42 | 4.77  | -3.10 |
| OR10G3       | 26533  | NM_001005465 | 17390 | -1.00 | -1.16 | -1.11 | 0.27  | 0.72  | 0.63  | -0.98 | -1.05 | -1.07 | -3.27 | 1.62  | -3.10 |
| PDCD2        | 9356   | NM_004228    | 17391 | -0.31 | -0.69 | -1.16 | 1.14  | 1.19  | 0.87  | -0.86 | -1.06 | -1.11 | -2.16 | 3.21  | -3.10 |
| LOC374569    | 374569 | NM_00107077  | 17392 | -0.87 | -0.68 | -0.67 | 0.88  | 0.48  | 0.48  | -1.11 | -0.98 | -1.08 | -2.98 | 2.69  | -3.10 |
| KUL3         | 26249  | NM_017415    | 17393 | -0.50 | -0.56 | -0.96 | 1.60  | 2.29  | 2.36  | -0.82 | -1.15 | -1.13 | -2.02 | 6.24  | -3.10 |
| CHORDC1      | 26973  | NM_012124    | 17394 | -0.59 | -0.24 | -0.29 | 2.35  | 2.96  | 1.59  | -0.92 | -1.12 | -1.07 | -0.06 | 6.90  | -3.11 |
| RHASEL3      | 40245  | NM_001021264 | 17395 | -0.92 | -1.04 | -0.98 | 0.56  | 1.71  | 0.67  | -1.05 | -1.04 | -1.04 | -2.62 | 4.25  | -3.11 |
| LOR          | 4014   | NM_000427    | 17396 | -1.12 | -0.91 | -1.04 | 4.06  | 2.83  | 1.08  | -1.15 | -1.31 | -0.64 | -3.07 | 7.97  | -3.11 |
| RPJ2         | 8346   | NM_000983    | 17397 | -0.70 | -0.89 | -0.88 | 0.45  | 1.26  | 2.06  | -0.85 | -1.06 | -1.20 | -2.46 | 3.77  | -3.11 |
| RFX1B        | 8395   | NM_00102558  | 17398 | -0.73 | -0.63 | -0.53 | 1.24  | 0.66  | 0.97  | -0.84 | -1.15 | -1.24 | -3.52 | 2.87  | -3.11 |
| RABAC1       | 10567  | NM_006423    | 17399 | -0.09 | -0.45 | -0.44 | 3.41  | 2.39  | 1.20  | -1.04 | -1.05 | -1.03 | -3.07 | 7.01  | -3.11 |
| BSPH1        | 16408  | NM_001128326 | 17400 | -0.66 | -0.89 | -0.39 | 1.78  | 0.88  | 0.98  | -1.07 | -1.22 | -0.81 | -1.93 | 3.63  | -3.11 |
| MPSH34       | 6599   | NM_023936    | 17401 | -1.02 | -1.19 | -1.32 | 0.49  | 0.35  | 1.52  | -0.79 | -0.99 | -1.31 | -3.53 | 2.68  | -3.11 |
| ASB2         | 5107   | NM_016150    | 17402 | -1.16 | -1.06 | -0.96 | 0.87  | 0.96  | 1.07  | -1.08 | -1.07 | -0.96 | -2.96 | 1.83  | -3.11 |
| INP1         | 353274 | NM_181489    | 17403 | -1.03 | -0.84 | -0.73 | 1.89  | 1.31  | 1.26  | -1.10 | -1.09 | -0.92 | -2.60 | 4.46  | -3.11 |
| ARFGAP1      | 55738  | NM_018209    | 17404 | -0.71 | -0.73 | -1.03 | 1.80  | 2.51  | 2.04  | -1.02 | -1.04 | -1.05 | -2.47 | 6.34  | -3.11 |
| ANK1         | 186    | NM_000481    | 17405 | -0.71 | -1.79 | -1.59 | 0.92  | 0.88  | 0.49  | -0.95 | -1.11 | -0.92 | -2.45 | 3.50  | -3.11 |
| LOC55974     | 55974  | NM_001122839 | 17406 | -1.01 | -1.36 | -0.85 | 1.16  | 0.55  |       |       |       |       |       |       |       |

|               |        |              |       |       |       |       |       |       |       |       |       |       |       |       |       |
|---------------|--------|--------------|-------|-------|-------|-------|-------|-------|-------|-------|-------|-------|-------|-------|-------|
| AGTP8P1       | 23887  | NM_015239    | 17489 | -1.16 | -0.82 | -1.00 | 0.93  | 0.28  | 1.03  | -1.16 | -0.83 | -1.18 | -2.97 | 2.24  | -3.17 |
| STNR3         | 2896   | NM_014574    | 17490 | -0.87 | -0.68 | -0.68 | 1.75  | 0.94  | 1.28  | -1.27 | -1.38 | -0.87 | -2.15 | 4.08  | -3.17 |
| C1OR2F2       | 11228  | NM_007211    | 17491 | 0.76  | 1.29  | -0.67 | 2.08  | 1.58  | 2.53  | -0.87 | -1.22 | -0.98 | 2.72  | 6.19  | -3.17 |
| MAR9E3        | 22924  | NM_012326    | 17492 | -1.00 | -1.26 | -1.24 | 1.91  | 1.74  | 1.76  | -0.93 | -0.93 | -1.32 | -3.50 | 5.41  | -3.17 |
| NDUP4R        | 4702   | NM_014222    | 17493 | -0.62 | -0.45 | -1.23 | 2.55  | 3.34  | 3.20  | -0.79 | -1.06 | -1.32 | -2.31 | 6.09  | -3.17 |
| ALG3          | 1015   | NM_0020642   | 17494 | -0.80 | -1.15 | -1.14 | 1.44  | 1.44  | 1.44  | -1.01 | -1.22 | -0.86 | -3.09 | 3.32  | -3.18 |
| DKX33         | 56919  | NM_0020162   | 17495 | -1.05 | -0.97 | -1.16 | 1.17  | 0.77  | 0.87  | -0.96 | -1.01 | -1.21 | -3.18 | 2.81  | -3.18 |
| ARL9          | 132946 | NM_200919    | 17496 | -0.89 | -1.08 | -1.05 | 2.62  | 0.93  | 1.61  | -1.00 | -1.19 | -0.99 | -3.02 | 5.16  | -3.18 |
| AG5884        | 196235 | NM_0030581   | 17497 | -1.01 | -0.87 | -0.96 | 1.25  | 1.27  | 1.34  | -1.11 | -0.92 | -1.17 | -3.14 | 3.13  | -3.18 |
| ABD26190      | 27252  | NM_014548    | 17498 | -1.33 | -1.46 | -1.30 | 1.64  | 2.20  | 2.54  | -1.11 | -0.94 | -1.13 | -4.09 | 6.39  | -3.18 |
| FLJ39660      | 284992 | NM_00180539  | 17499 | -0.95 | -0.78 | -0.68 | 1.24  | 1.80  | 1.27  | -1.20 | -1.05 | -0.93 | -2.41 | 4.31  | -3.18 |
| DFR1213       | 245936 | NM_0020140   | 17500 | -1.10 | -0.56 | -1.02 | 1.26  | 1.66  | 1.65  | -1.11 | -0.76 | -1.14 | -3.18 | 5.58  | -3.18 |
| ATP13A        | 57130  | NM_020410    | 17501 | -1.48 | -1.48 | -0.12 | 2.37  | 2.29  | 0.69  | -1.40 | -1.58 | -0.20 | -3.08 | 2.31  | -3.18 |
| RFS6K2        | 6159   | NM_001007071 | 17502 | -1.31 | -1.36 | -1.46 | 0.00  | 0.22  | 0.14  | -1.06 | -1.04 | -1.08 | -4.13 | 3.06  | -3.18 |
| RMS3          | 22999  | NM_014889    | 17503 | -0.77 | -0.57 | -0.67 | 1.43  | 1.26  | 2.76  | -1.11 | -0.87 | -1.20 | -2.02 | 5.45  | -3.18 |
| PHL41         | 51533  | NM_020438    | 17504 | -1.01 | 0.87  | -0.96 | 1.22  | 0.55  | 0.65  | -1.20 | -1.01 | -0.97 | -2.88 | 2.44  | -3.18 |
| C14ORF124     | 56948  | NM_0020195   | 17505 | -1.30 | -1.10 | -1.27 | 0.00  | 0.01  | 1.03  | -1.11 | -0.94 | -1.14 | -3.67 | 1.03  | -3.18 |
| FLJ29226      | 93233  | NM_00135194  | 17506 | -1.08 | -1.11 | -0.85 | 2.18  | 1.52  | 1.95  | -1.27 | -1.18 | -0.74 | -3.05 | 5.65  | -3.18 |
| NPT21         | 4884   | NM_0020252   | 17507 | -1.03 | -1.08 | -1.05 | 0.79  | 0.71  | 0.74  | -1.02 | -1.15 | -1.03 | -3.16 | 2.24  | -3.18 |
| LRP2          | 4036   | NM_004525    | 17508 | -0.84 | -1.08 | -0.90 | 0.55  | -0.13 | 0.69  | -1.11 | -1.10 | -0.98 | -2.82 | 1.11  | -3.19 |
| MCM3AP        | 8888   | NM_003906    | 17509 | -1.19 | -1.18 | -1.06 | 0.28  | 0.76  | 0.14  | -1.12 | -1.16 | -0.91 | -3.44 | 0.34  | -3.19 |
| EF2A2         | 9339   | NM_001023999 | 17510 | -0.76 | -1.12 | -1.46 | 1.27  | 1.16  | 0.98  | -0.84 | -0.99 | -1.26 | -3.35 | 2.41  | -3.19 |
| KUAI513       | 114801 | NM_025913    | 17511 | -1.02 | -0.55 | -0.34 | 1.16  | 1.30  | 1.84  | -1.04 | -1.04 | -1.11 | -3.91 | 4.30  | -3.19 |
| FGFR2         | 2263   | NM_002296    | 17512 | -0.41 | -0.97 | -0.62 | 1.95  | 2.18  | 1.52  | -0.97 | -1.27 | -0.95 | -2.01 | 5.66  | -3.19 |
| SFTB          | 6439   | NM_000542    | 17513 | -1.03 | -1.13 | -1.73 | 0.16  | 0.63  | -0.07 | -0.85 | -1.13 | -1.21 | -3.89 | 0.72  | -3.19 |
| KOR6          | 28338  | NM_179605    | 17514 | -0.32 | -1.00 | -0.76 | 2.12  | 1.61  | 1.50  | -0.81 | -1.20 | -1.08 | -2.19 | 5.22  | -3.19 |
| DKFZP434C17   | 26112  | NM_015621    | 17515 | -1.02 | -1.19 | -1.32 | 1.10  | 1.61  | 1.46  | -0.98 | -1.27 | -0.95 | -3.54 | 4.17  | -3.19 |
| RAO18         | 56852  | NM_002165    | 17516 | -1.16 | -0.99 | -1.10 | 0.69  | 1.53  | 1.02  | -0.96 | -1.14 | -1.09 | -3.24 | 3.23  | -3.19 |
| CFH481        | 1350   | NM_002779    | 17517 | -1.03 | -1.21 | -1.09 | 1.21  | 1.69  | 1.39  | -1.09 | -1.39 | -1.21 | -3.10 | 3.60  | -3.19 |
| MCM3C308      | 285000 | NM_175922    | 17518 | -0.66 | -1.21 | -1.25 | 1.18  | 1.53  | 2.77  | -0.57 | -1.20 | -1.42 | -3.12 | 4.59  | -3.19 |
| AP1GBP1       | 113276 | NM_080550    | 17519 | -0.94 | -0.76 | -1.02 | 0.93  | 1.12  | 1.18  | -1.11 | -1.01 | -1.07 | -2.73 | 3.23  | -3.19 |
| HS7R493       | 839    | NM_000054    | 17520 | -1.01 | -1.00 | -1.00 | 0.60  | 0.86  | -0.90 | -1.01 | -1.03 | -1.46 | -3.11 | 2.79  | -3.19 |
| LOC28322      | 28232  | NM_174940    | 17521 | -1.48 | -1.26 | -1.67 | 0.09  | -0.98 | -0.69 | -1.15 | -1.02 | -1.03 | -4.41 | -1.77 | -3.19 |
| LOC56270      | 56270  | NM_019613    | 17522 | -0.54 | 0.35  | -0.29 | 2.98  | 2.43  | 2.63  | -1.21 | -0.88 | -1.11 | -0.48 | 8.04  | -3.19 |
| DNTP1         | 116992 | NM_025291    | 17523 | -1.22 | -1.91 | -1.43 | -0.24 | 0.16  | 0.04  | -1.07 | -0.96 | -1.10 | -3.56 | 0.56  | -3.19 |
| CHRNA5        | 113    | NM_000745    | 17524 | -1.39 | -1.39 | -1.09 | 1.30  | 1.15  | 1.12  | -1.10 | -1.12 | -1.08 | -3.77 | 1.24  | -3.19 |
| PABPC3        | 5042   | NM_030979    | 17525 | -1.22 | -0.68 | -1.35 | 0.86  | 0.32  | 0.83  | -1.22 | -0.77 | -1.21 | -3.25 | 2.01  | -3.20 |
| ZNF554        | 115156 | NM_001102651 | 17526 | -0.74 | -0.45 | -1.10 | 0.79  | 1.42  | 1.39  | -1.01 | -0.99 | -1.19 | -2.29 | 3.59  | -3.20 |
| NR1C4         | 119    | NM_018118    | 17527 | -1.06 | -1.05 | -1.03 | 0.76  | 0.76  | 0.76  | -1.09 | -1.02 | -1.07 | -2.51 | 1.90  | -3.20 |
| COL21A1       | 81578  | NM_030820    | 17528 | -0.69 | -0.47 | -0.63 | 4.07  | 2.84  | 2.83  | -1.16 | -0.94 | -1.10 | -1.79 | 9.74  | -3.20 |
| PTPRN         | 5798   | NM_002846    | 17529 | -0.75 | -1.27 | -1.17 | 0.69  | 1.09  | 1.40  | -0.82 | -1.17 | -1.20 | -3.19 | 3.18  | -3.20 |
| ZNF234        | 1079   | NM_001620    | 17530 | -1.03 | -0.54 | -0.73 | 1.47  | 1.54  | 0.60  | -1.19 | -1.07 | -1.45 | -2.34 | 5.57  | -3.20 |
| SC7           | 6343   | NM_021920    | 17531 | -0.84 | -1.10 | -1.72 | 2.41  | 1.72  | 1.65  | -0.88 | -0.85 | -1.47 | -3.65 | 5.79  | -3.20 |
| CGI-121       | 51002  | NM_016508    | 17532 | -1.25 | -0.42 | -1.06 | 1.44  | 2.37  | 1.65  | -1.14 | -0.95 | -1.11 | -2.73 | 5.47  | -3.20 |
| ECH1          | 1891   | NM_001398    | 17533 | -0.69 | -0.81 | -0.99 | 2.72  | 2.85  | 2.50  | -1.06 | -1.07 | -1.08 | -2.49 | 8.06  | -3.20 |
| FREB          | 84824  | NM_032738    | 17534 | -1.26 | -1.44 | -1.10 | 1.20  | 1.44  | 1.02  | -1.10 | -1.00 | -1.02 | -3.98 | 0.98  | -3.20 |
| EGR4          | 1961   | NM_001965    | 17535 | -1.18 | -1.17 | -1.21 | -0.11 | -0.12 | -0.63 | -1.07 | -1.10 | -1.03 | -3.56 | -0.86 | -3.20 |
| ANKA          | 80709  | NM_030767    | 17536 | -0.99 | -0.72 | -1.11 | 0.72  | 0.29  | 1.57  | -1.13 | -0.81 | -1.26 | -2.81 | 2.58  | -3.20 |
| CC12A9        | 5656   | NM_002046    | 17537 | -0.85 | -0.40 | -0.76 | 2.65  | 2.65  | 2.64  | -1.06 | -1.06 | -1.06 | -3.20 | 2.97  | -3.20 |
| GALNT11       | 57452  | NM_020692    | 17538 | -0.95 | -0.99 | -1.19 | 0.88  | 2.14  | 1.11  | -0.98 | -1.14 | -1.08 | -3.13 | 4.12  | -3.21 |
| KIAA0773      | 9715   | NM_014690    | 17539 | -1.47 | -1.31 | -1.16 | 0.77  | 1.03  | 1.33  | -0.95 | -1.20 | -1.06 | -3.94 | 3.13  | -3.21 |
| PTPRN         | 5395   | NM_000224    | 17540 | -1.50 | -0.62 | -0.24 | 2.92  | 2.78  | 2.32  | -1.06 | -1.02 | -0.82 | -1.66 | 2.71  | -3.21 |
| OR4D          | 441639 | NM_001005243 | 17541 | -1.12 | -1.04 | -0.68 | 2.49  | 0.71  | 1.28  | -1.20 | -1.11 | -0.90 | -2.88 | 4.48  | -3.21 |
| MTRN18        | 4544   | NM_000559    | 17542 | -0.81 | -1.10 | -0.98 | 1.26  | 1.20  | 1.35  | -1.01 | -1.14 | -1.06 | -2.89 | 3.81  | -3.21 |
| AVPR2         | 554    | NM_000054    | 17543 | -1.30 | -0.93 | -1.49 | 0.67  | 0.63  | 0.40  | -1.13 | -0.86 | -1.22 | -3.73 | 1.76  | -3.21 |
| ANK           | 4598   | NM_000811    | 17544 | -1.34 | -0.74 | -1.03 | 1.36  | 1.36  | 2.38  | -0.91 | -1.22 | -0.96 | -2.11 | 5.68  | -3.21 |
| PPP1R7        | 5510   | NM_002712    | 17545 | -0.94 | -1.16 | -1.55 | 0.50  | 0.93  | 0.47  | -0.89 | -1.06 | -1.26 | -3.65 | 1.91  | -3.21 |
| HNR           | 88697  | NM_001009911 | 17546 | -1.24 | -1.24 | -1.64 | -0.45 | -0.75 | -1.07 | -0.99 | -1.19 | -1.03 | -4.11 | -2.26 | -3.21 |
| AD9           | 8452   | NM_000842    | 17547 | -1.11 | -1.09 | -1.09 | 1.24  | 1.93  | 1.89  | -1.11 | -1.11 | -1.09 | -3.09 | 1.19  | -3.21 |
| CAMM10A1P     | 55450  | NM_018584    | 17548 | -1.70 | -1.10 | -1.13 | 1.00  | 2.19  | 1.06  | -0.93 | -1.06 | -1.23 | -2.92 | 4.24  | -3.21 |
| ATP7B         | 540    | NM_00105918  | 17549 | -0.13 | -0.97 | -1.39 | 0.23  | 0.12  | 1.05  | -1.01 | -0.87 | -1.34 | -3.49 | 1.41  | -3.21 |
| PTK1          | 5387   | NM_001020    | 17550 | -1.18 | -1.25 | -1.11 | -1.35 | -1.35 | -1.19 | -1.15 | -1.19 | -1.64 | -3.51 | 1.51  | -3.21 |
| TOMM7         | 54543  | NM_019609    | 17551 | -1.44 | -0.56 | -0.52 | 2.38  | 2.45  | 2.69  | -1.06 | -1.11 | -1.05 | -3.13 | 7.52  | -3.22 |
| KRTAP18.8     | 38681  | NM_198695    | 17552 | -1.48 | -1.18 | -0.30 | 0.33  | 0.45  | 0.75  | -1.35 | -1.03 | -0.84 | -2.96 | 1.52  | -3.22 |
| OR2A7         | 40422  | NM_001003228 | 17553 | -1.09 | -0.83 | -0.94 | 1.36  | 1.34  | 1.38  | -1.17 | -0.99 | -1.08 | -2.86 | 3.69  | -3.22 |
| NR3C1         | 56624  | NM_001392    | 17554 | -1.09 | -1.13 | -1.87 | 1.05  | 1.12  | 0.99  | -1.12 | -0.99 | -1.09 | -3.98 | 0.78  | -3.22 |
| OR10H3        | 26332  | NM_013938    | 17555 | -0.76 | -0.77 | -1.27 | 1.53  | 2.07  | 2.33  | -0.86 | -1.28 | -1.08 | -2.80 | 5.93  | -3.22 |
| UAFAL3        | 199746 | NM_144887    | 17556 | -0.34 | -1.09 | -1.16 | 1.29  | 2.09  | 1.67  | -0.79 | -1.24 | -1.18 | -2.59 | 5.05  | -3.22 |
| NALND2        | 25487  | NM_020015    | 17557 | -1.13 | -1.18 | -1.04 | 1.18  | 1.17  | 1.18  | -1.12 | -1.07 | -1.06 | -3.18 | 2.93  | -3.22 |
| MPSR22        | 56945  | NM_020191    | 17558 | -1.66 | -1.03 | -0.53 | 1.03  | 0.56  | 1.81  | -1.09 | -1.06 | -1.06 | -2.22 | 3.40  | -3.22 |
| HST1H3H       | 8357   | NM_003336    | 17559 | -1.32 | -1.14 | -1.43 | -0.22 | -0.06 | 0.34  | -1.21 | -0.98 | -1.02 | -3.89 | 0.06  | -3.22 |
| FLJ275646Z026 | 25886  | NM_0018421   | 17560 | -1.66 | -1.48 | -1.10 | -1.68 | -1.68 | -1.68 | -1.12 | -1.08 | -1.02 | -4.11 | 0.15  | -3.22 |
| CGORF11       | 9277   | NM_005452    | 17561 | -1.34 | -1.31 | -1.68 | 0.06  | 1.06  | 0.55  | -0.99 | -1.12 | -1.11 | -4.33 | 1.55  | -3.22 |
| SLCA3         | 6508   | NM_005070    | 17562 | -0.23 | -1.20 | -0.44 | 2.91  | 4.29  | 3.95  | -0.88 | -1.35 | -0.99 | -1.86 | 11.15 | -3.22 |
| ADD1          | 118    | NM_001319    | 17563 | -1.15 | -1.17 | -1.45 | 1.64  | 1.79  | 1.17  | -1.03 | -1.03 | -1.16 | -3.76 | 4.80  | -3.22 |
| SCOR8         | 2353   | NM_015336    | 17564 | -0.56 | -0.88 | -1.21 | 0.61  | -0.99 | -1.52 | -0.91 | -0.99 | -1.34 | -2.64 | 3.93  | -3.22 |
| CF1           | 1469   | NM_001898    | 17565 | -0.74 | -1.26 | -0.98 | 1.08  | 2.26  | 2.09  | -0.73 | -1.24 | -1.26 | -2.98 | 5.44  | -3.22 |
| ELF1          | 1997   | NM_172737    | 17566 | 0.05  | -0.92 | -1.11 | 2.04  | 2.20  | 2.66  | -0.70 | -1.29 | -1.23 | -1.99 | 6.91  | -3.22 |
| KIF2AP-4      | 8526   | NM_003331    | 17567 | -0.85 | -0.93 | -0.52 | 1.46  | 2.02  | 1.64  | -1.07 | -1.04 | -1.04 | -2.69 | 1.69  | -3.22 |
| THSP          | 7069   | NM_003251    | 17568 | -0.78 | -0.25 | -0.52 | 3.76  | 3.59  | 3.5   |       |       |       |       |       |       |

|              |        |             |       |       |       |       |       |       |       |       |       |       |       |       |       |
|--------------|--------|-------------|-------|-------|-------|-------|-------|-------|-------|-------|-------|-------|-------|-------|-------|
| TGFA         | 7039   | NM_003236   | 17651 | -1.12 | -1.42 | -1.51 | 0.40  | -0.43 | 0.23  | -0.99 | -1.07 | -1.25 | -4.05 | 0.20  | -3.30 |
| FL10490      | 55159  | NM_011111   | 17653 | -1.20 | -1.27 | -1.24 | 0.01  | 0.11  | 0.21  | -1.03 | -1.09 | -1.11 | -1.01 | 0.54  | -3.21 |
| CG-94        | 51118  | NM_016037   | 17653 | -1.08 | -1.36 | -1.43 | 2.02  | 1.09  | 2.04  | -1.02 | -1.12 | -1.17 | -3.80 | 5.14  | -3.31 |
| TRPM6        | 140803 | NM_017662   | 17654 | -1.03 | -1.29 | -0.89 | 1.31  | 0.97  | 1.45  | -1.10 | -1.12 | -1.09 | -3.21 | 3.73  | -3.31 |
| SPN17        | 6692   | NM_00152280 | 17655 | -1.22 | -1.57 | -1.08 | -0.26 | -1.23 | 0.11  | -1.14 | -1.11 | -1.06 | -3.87 | -1.38 | -3.31 |
| SLAMF8       | 5663   | NM_001725   | 17656 | -1.40 | -1.12 | -1.46 | 0.57  | 0.57  | 0.57  | -1.21 | -1.02 | -1.07 | -3.88 | 1.68  | -3.31 |
| GUCY1B3      | 2983   | NM_000857   | 17657 | -1.50 | -0.65 | -1.62 | 1.69  | 1.66  | 0.55  | -0.96 | -0.97 | -1.38 | -2.76 | 3.89  | -3.31 |
| NBL          | 10529  | NM_213569   | 17658 | -1.02 | -1.07 | -1.23 | 3.73  | 2.44  | 2.19  | -1.17 | -1.03 | -1.11 | -3.32 | 8.36  | -3.31 |
| MGC44665     | 21603  | NM_001208   | 17659 | -1.26 | -1.40 | -1.21 | 1.26  | 1.04  | 1.03  | -1.12 | -1.04 | -1.12 | -3.88 | 5.57  | -3.31 |
| DAB1         | 1600   | NM_021080   | 17660 | -1.07 | -1.28 | -0.91 | 0.79  | 1.13  | 0.54  | -1.13 | -1.33 | -0.86 | -3.29 | 2.46  | -3.31 |
| PHL6         | 28755  | NM_173672   | 17661 | -0.73 | -0.73 | -1.13 | 3.41  | 2.11  | 1.89  | -1.07 | -0.86 | -1.38 | -2.58 | 7.41  | -3.32 |
| FL12580      | 13447  | NM_016216   | 17662 | -1.47 | -1.49 | -1.14 | 0.40  | 0.85  | -0.48 | -1.25 | -1.40 | -1.18 | -4.08 | -0.78 | -3.32 |
| ASK          | 10926  | NM_006716   | 17663 | -1.02 | -0.89 | -1.29 | 1.66  | 0.74  | 1.07  | -1.04 | -1.10 | -1.18 | -3.20 | 4.07  | -3.32 |
| FL11078      | 55295  | NM_018316   | 17664 | -1.53 | -1.53 | -1.69 | 0.95  | -0.37 | 0.50  | -1.01 | -1.04 | -1.27 | -4.76 | 1.08  | -3.32 |
| ZN151        | 7709   | NM_003443   | 17665 | -1.07 | -0.99 | -1.23 | 1.34  | 1.88  | 0.90  | -1.02 | -1.30 | -1.19 | -3.28 | 3.31  | -3.32 |
| GNE3         | 2785   | NM_012022   | 17666 | -0.92 | -0.89 | -1.45 | 0.47  | 0.49  | 0.51  | -1.05 | -0.99 | -1.29 | -3.46 | 1.48  | -3.32 |
| GABRQ        | 55879  | NM_018558   | 17667 | -1.01 | -1.38 | -1.32 | 1.35  | 2.02  | 1.62  | -0.88 | -1.24 | -1.21 | -3.71 | 4.99  | -3.32 |
| CD47         | 961    | NM_198793   | 17668 | -1.01 | -1.05 | -1.00 | 2.55  | 1.73  | 3.03  | -1.11 | -1.09 | -1.12 | -3.07 | 7.31  | -3.32 |
| SC351        | 79539  | NM_020481   | 17669 | -1.43 | -1.46 | -1.74 | -0.28 | -0.49 | -0.95 | -1.25 | -1.01 | -1.06 | -4.62 | 1.72  | -3.32 |
| ABCG5        | 64340  | NM_022436   | 17670 | -0.67 | -1.11 | -0.90 | 1.62  | 2.24  | 2.26  | -0.86 | -1.22 | -1.25 | -2.68 | 6.12  | -3.33 |
| PIT1         | 5307   | NM_020653   | 17671 | -1.00 | -0.68 | -1.30 | 1.83  | 3.68  | 2.24  | -0.95 | -1.05 | -1.33 | -2.98 | 7.75  | -3.33 |
| SLC11A1      | 2125   | NM_001388   | 17672 | -1.25 | -1.14 | -1.00 | -0.34 | 0.86  | 0.95  | -1.14 | -1.15 | -1.04 | -3.40 | 1.48  | -3.33 |
| SPACAS8      | 729201 | NM_00107900 | 17673 | -1.26 | -1.03 | -0.84 | -1.23 | 0.88  | 0.55  | -1.32 | -1.14 | -0.87 | -3.13 | 2.45  | -3.33 |
| ZSCAN1       | 284312 | NM_182572   | 17674 | -1.33 | -1.18 | -1.53 | -0.81 | -0.03 | -0.01 | -1.04 | -1.05 | -1.24 | -4.04 | -0.85 | -3.33 |
| OLIG17       | 121564 | NM_00105280 | 17675 | -1.72 | -1.00 | -0.94 | 1.71  | 1.63  | 1.98  | -1.07 | -1.20 | -1.06 | -2.66 | 4.72  | -3.33 |
| SNRKA3       | 6506   | NM_139048   | 17676 | -1.08 | -1.36 | -1.34 | 0.56  | 0.17  | 0.31  | -0.92 | -1.21 | -1.20 | -3.78 | 1.04  | -3.33 |
| GRK1         | 2807   | NM_000830   | 17677 | -1.15 | -1.40 | -1.17 | 0.33  | 0.53  | 0.86  | -1.05 | -1.21 | -1.08 | -3.71 | 1.73  | -3.33 |
| RFP          | 5987   | NM_030950   | 17678 | -0.72 | -1.20 | -0.92 | 4.11  | 2.11  | 2.95  | -1.12 | -1.07 | -1.14 | -2.85 | 9.17  | -3.33 |
| FL24191      | 34451  | NM_00080858 | 17679 | -1.42 | -1.53 | -1.20 | 1.42  | 1.13  | 0.89  | -1.12 | -1.11 | -1.02 | -4.25 | 1.09  | -3.33 |
| FL3268       | 401563 | NM_207511   | 17680 | -1.28 | -1.45 | -1.43 | 2.87  | 2.21  | 3.63  | -1.12 | -1.00 | -1.21 | -4.16 | 8.71  | -3.34 |
| KIRC2        | 3822   | NM_002260   | 17681 | -0.78 | -1.14 | -1.04 | 1.76  | 1.34  | 2.20  | -1.00 | -1.18 | -1.16 | -2.96 | 5.30  | -3.34 |
| MRHEF19      | 128276 | NM_012113   | 17682 | -0.41 | -1.16 | -0.87 | 1.69  | 3.04  | 2.39  | -1.02 | -1.11 | -1.21 | -3.49 | 3.32  | -3.34 |
| UNC5F4       | 282388 | NM_198474   | 17683 | -0.71 | 0.11  | -0.98 | 2.64  | 0.91  | 2.75  | -1.28 | -0.76 | -1.29 | -1.79 | 6.30  | -3.34 |
| ATP5E        | 514    | NM_006886   | 17684 | -0.98 | -0.93 | -1.08 | 1.86  | 1.57  | 0.48  | -1.24 | -1.12 | -0.98 | -2.98 | 3.91  | -3.34 |
| HS477841     | 55421  | NM_00114118 | 17685 | -1.85 | -1.13 | -1.55 | 0.26  | 0.15  | 0.54  | -1.10 | -1.13 | -1.10 | -4.08 | 0.95  | -3.34 |
| RN43         | 140730 | NM_182070   | 17686 | -0.98 | -1.18 | -0.99 | 0.81  | 1.49  | 0.81  | -0.93 | -1.29 | -1.16 | -3.16 | 3.44  | -3.34 |
| SNR19        | 99979  | NM_014758   | 17687 | -1.27 | -1.14 | -1.21 | 1.02  | 0.00  | 0.30  | -1.21 | -1.00 | -1.13 | -3.63 | 1.32  | -3.34 |
| ALPHA9NT     | 51146  | NM_016161   | 17688 | -1.33 | -1.35 | -0.56 | 0.38  | 0.64  | 1.19  | -1.17 | -1.42 | -0.75 | -3.24 | 2.22  | -3.34 |
| LOC57146     | 57146  | NM_018422   | 17689 | -1.35 | -1.25 | -1.01 | 0.66  | 1.16  | 1.26  | -1.06 | -1.16 | -1.09 | -3.71 | 2.63  | -3.34 |
| FL10826      | 55239  | NM_00101707 | 17690 | -1.44 | -1.31 | -1.72 | 2.46  | 1.05  | 2.66  | -1.18 | -1.08 | -1.08 | -4.47 | 6.18  | -3.34 |
| MGC14376     | 84881  | NM_00103870 | 17691 | -1.35 | -1.64 | -1.49 | 0.83  | 0.97  | 0.37  | -1.01 | -1.25 | -1.08 | -4.48 | 2.17  | -3.34 |
| FN1          | 5879   | NM_00103870 | 17692 | -1.12 | -0.77 | -0.83 | 0.87  | 1.12  | 0.87  | -1.12 | -1.12 | -1.12 | -2.47 | 6.92  | -3.34 |
| NEU1         | 4758   | NM_000434   | 17693 | -1.48 | -1.16 | -1.62 | 0.32  | -0.19 | -0.07 | -1.14 | -0.96 | -1.24 | -3.07 | 0.07  | -3.34 |
| CSORF12      | 256987 | NM_178276   | 17694 | -0.68 | -0.91 | -1.11 | 1.19  | 0.72  | 3.52  | -0.94 | -1.07 | -1.33 | -2.70 | 5.43  | -3.34 |
| PDE8A        | 5151   | NM_174455   | 17695 | -0.99 | -1.05 | -0.72 | 2.54  | 1.79  | 1.59  | -1.24 | -1.15 | -0.95 | -2.71 | 5.92  | -3.34 |
| SNP          | 80209  | NM_030623   | 17696 | -1.19 | -1.08 | -1.20 | 0.94  | 1.07  | 1.19  | -1.07 | -1.19 | -1.04 | -3.55 | 1.68  | -3.34 |
| ADAM15L1     | 92949  | NM_052866   | 17697 | -1.37 | -1.28 | -1.51 | 0.76  | 1.12  | 0.54  | -1.26 | -1.02 | -1.07 | -4.16 | 1.34  | -3.35 |
| MDF1         | 4188   | NM_005586   | 17698 | -1.05 | -0.81 | -0.90 | 0.99  | 2.12  | 1.94  | -0.86 | -1.27 | -1.22 | -2.36 | 4.89  | -3.35 |
| GA3          | 8412   | NM_009567   | 17699 | -1.18 | -1.01 | -1.01 | 0.60  | 0.60  | 0.60  | -1.25 | -1.06 | -1.01 | -3.27 | 1.11  | -3.35 |
| CASA         | 763    | NM_001739   | 17700 | -1.00 | -0.97 | -1.09 | 1.99  | 1.63  | 1.27  | -1.12 | -1.13 | -1.10 | -3.06 | 4.88  | -3.35 |
| TNR          | 7143   | NM_003285   | 17701 | -1.16 | -1.23 | -0.75 | 2.26  | 1.23  | 2.69  | -0.95 | -1.22 | -1.17 | -3.14 | 6.18  | -3.35 |
| LOC13268     | 131389 | NM_173656   | 17702 | -0.55 | -0.85 | -0.66 | 2.54  | 2.54  | 2.54  | -1.07 | -1.04 | -1.08 | -2.55 | 8.88  | -3.35 |
| COLEC10      | 10584  | NM_006438   | 17703 | -0.91 | -0.93 | -0.96 | 3.90  | 1.78  | 1.72  | -1.14 | -0.98 | -1.24 | -2.80 | 7.40  | -3.35 |
| ST8SIA4      | 338596 | NM_00100470 | 17704 | -1.15 | -1.41 | -1.34 | 0.35  | 0.42  | 0.86  | -1.09 | -1.24 | -1.02 | -3.90 | 1.64  | -3.36 |
| FLT1         | 10211  | NM_005083   | 17705 | -0.89 | -1.07 | -1.13 | 1.71  | 1.02  | 1.80  | -1.08 | -1.03 | -1.24 | -3.08 | 4.58  | -3.36 |
| ITIH7        | 64130  | NM_021455   | 17706 | -1.22 | -1.12 | -1.09 | 1.42  | 1.12  | 1.09  | -1.08 | -1.11 | -1.02 | -3.33 | 5.97  | -3.36 |
| FAM43A       | 131583 | NM_153690   | 17707 | -1.07 | -1.04 | -1.11 | 1.51  | 1.12  | 1.24  | -1.38 | -0.89 | -1.10 | -2.62 | 8.87  | -3.36 |
| EPHA5        | 2044   | NM_182472   | 17708 | -1.07 | -1.09 | -1.33 | 1.01  | 1.51  | 0.75  | -1.02 | -0.99 | -1.35 | -3.49 | 3.27  | -3.36 |
| ADPZP1610051 | 84474  | NM_020329   | 17709 | -1.00 | -1.18 | -0.94 | 1.66  | 1.66  | 2.16  | -1.06 | -1.16 | -1.06 | -3.12 | 5.61  | -3.36 |
| PM1A         | 5494   | NM_177952   | 17710 | -1.11 | -0.84 | -1.06 | 0.74  | 3.40  | 1.64  | -1.09 | -1.09 | -1.18 | -3.01 | 5.79  | -3.36 |
| ZNF318       | 24149  | NM_014345   | 17711 | 0.14  | -1.07 | -0.57 | 3.23  | 3.86  | 3.10  | -1.03 | -1.18 | -1.16 | -3.13 | 10.20 | -3.36 |
| MGC2024      | 155843 | NM_030403   | 17712 | -0.80 | -1.56 | -1.44 | 0.26  | 0.48  | 0.48  | -1.04 | -1.26 | -1.44 | -3.79 | 3.37  | -3.36 |
| TNPO2        | 30000  | NM_013433   | 17713 | -1.16 | -0.83 | -0.96 | 0.39  | 1.62  | 1.40  | -1.06 | -1.22 | -1.09 | -3.40 | 3.40  | -3.37 |
| ZBP1         | 81030  | NM_030776   | 17714 | -0.96 | -1.14 | -1.37 | 1.13  | 0.79  | 0.78  | -1.05 | -1.16 | -1.17 | -3.47 | 2.70  | -3.37 |
| EFZB3        | 8891   | NM_020265   | 17715 | -1.14 | -0.93 | -1.50 | 0.74  | 0.80  | 0.41  | -1.30 | -1.08 | -1.20 | -3.58 | 1.94  | -3.37 |
| CTNBB1       | 56289  | NM_030977   | 17716 | -1.00 | -1.00 | -1.01 | 1.74  | 1.01  | 1.57  | -1.01 | -1.29 | -1.11 | -3.29 | 6.59  | -3.37 |
| OVCA2        | 124641 | NM_080822   | 17717 | -1.09 | -0.98 | -1.04 | 1.22  | 1.72  | 2.81  | -1.20 | -0.94 | -1.23 | -3.11 | 5.76  | -3.37 |
| KRTAP1-3     | 81850  | NM_030966   | 17718 | -0.97 | -0.93 | -1.43 | 1.96  | 1.40  | 1.56  | -1.09 | -0.88 | -1.40 | -3.33 | 4.92  | -3.38 |
| FGF3         | 8074   | NM_020638   | 17719 | -1.05 | -0.98 | -1.02 | 1.43  | 1.12  | 1.13  | -1.02 | -1.13 | -1.13 | -3.29 | 4.73  | -3.38 |
| TS1A3        | 7264   | NM_003313   | 17720 | -1.09 | -1.20 | -0.87 | 0.99  | 0.77  | 1.31  | -1.10 | -1.17 | -1.10 | -3.67 | 3.07  | -3.38 |
| CCN          | 881    | NM_005993   | 17721 | -1.09 | -1.17 | -1.21 | 2.42  | 1.69  | 0.49  | -1.26 | -1.14 | -0.98 | -3.47 | 4.61  | -3.38 |
| DN3          | 1810   | NM_001258   | 17722 | -1.04 | -1.00 | -1.20 | 1.61  | 1.47  | 1.61  | -1.04 | -1.10 | -1.17 | -2.65 | 4.61  | -3.38 |
| KR3D1L       | 3811   | NM_013289   | 17723 | -1.08 | -0.87 | -0.70 | 1.37  | 1.50  | 2.55  | -1.20 | -1.01 | -1.17 | -3.65 | 5.41  | -3.38 |
| P8BP         | 55578  | NM_00104286 | 17724 | -1.37 | -1.65 | -1.58 | 2.98  | 1.84  | 2.56  | -1.07 | -1.12 | -1.20 | -4.60 | 7.38  | -3.38 |
| LOC145741    | 145741 | NM_207122   | 17725 | -0.52 | -1.15 | -1.24 | 1.90  | 2.57  | 2.94  | -0.88 | -1.24 | -1.27 | -2.93 | 7.02  | -3.38 |
| LOC100133    | 2590   | NM_005482   | 17726 | -1.26 | -1.23 | -1.54 | 1.32  | 1.22  | 1.54  | -1.16 | -1.02 | -1.09 | -4.09 | 3.68  | -3.38 |
| FL14025      | 147699 | NM_178494   | 17727 | -1.30 | -1.16 | -1.18 | 1.35  | 1.52  | 1.32  | -1.21 | -1.13 | -1.05 | -3.63 | 4.19  | -3.39 |
| SEC11L       | 23478  | NM_014300   | 17728 | -0.92 | -1.33 | -1.21 | 1.63  | 1.18  | 0.75  | -1.09 | -1.23 | -1.07 | -3.46 | 3.57  | -3.39 |
| IFP95        | 23467  | NM_012102   | 17729 | -1.23 | -1.26 | -1.87 | 1.62  | 1.62  | 1.62  | -1.02 | -1.05 | -1.05 | -3.36 | 3.63  | -3.39 |
| OR8K5        | 219453 | NM_00104058 | 17730 | -0.72 | -0.80 | -1.13 | 1.17  | 1.64  | 1.82  | -1.01 |       |       |       |       |       |

|           |        |              |       |       |       |       |       |       |       |       |       |       |       |       |       |
|-----------|--------|--------------|-------|-------|-------|-------|-------|-------|-------|-------|-------|-------|-------|-------|-------|
| SPNCS     | 94997  | NM_144579    | 17813 | -0.57 | -1.61 | -0.75 | 2.93  | 2.95  | 2.06  | -1.01 | -1.28 | -1.21 | -2.94 | 7.94  | -3.49 |
| SPR4      | 85397  | NM_139126    | 17814 | -1.01 | -1.16 | -1.34 | 2.20  | 2.68  | 2.08  | -0.97 | -1.19 | -1.07 | -3.51 | 4.88  | -3.48 |
| KUAI1765  | 85443  | NM_149155    | 17815 | -0.97 | -1.06 | -1.50 | 0.92  | 1.12  | 0.44  | -1.12 | -1.12 | -1.25 | -3.51 | 3.47  | -3.50 |
| EVZA      | 2123   | NM_014210    | 17816 | -1.54 | -1.47 | -1.23 | 0.39  | 0.04  | -0.28 | -1.31 | -1.24 | -0.95 | -4.24 | 0.14  | -3.50 |
| BC2       | 27243  | NM_014463    | 17817 | -2.35 | -2.17 | -2.48 | -2.51 | -2.76 | -2.09 | -1.23 | -1.16 | -1.11 | -6.99 | -7.33 | -3.50 |
| SUN       | 658    | NM_009063    | 17818 | -0.92 | -0.88 | -1.00 | 0.88  | 0.88  | 0.88  | -1.28 | -1.08 | -1.27 | -2.80 | 2.82  | -3.50 |
| ARSD      | 414    | NM_009589    | 17819 | -1.08 | -1.08 | -1.00 | 1.84  | 0.69  | 0.94  | -1.14 | -1.21 | -1.15 | -3.16 | 3.47  | -3.50 |
| SUC1      | 12460  | NM_182854    | 17820 | -1.19 | -1.46 | -0.91 | 0.23  | 0.77  | 1.05  | -1.19 | -1.33 | -0.99 | -3.55 | 2.04  | -3.50 |
| MC1C      | 4157   | NM_002386    | 17821 | -1.24 | -1.24 | -1.34 | 1.84  | 4.1   | 1.14  | -1.14 | -1.14 | -1.14 | -3.41 | 4.89  | -3.50 |
| MSMB      | 4477   | NM_138634    | 17822 | -0.70 | -0.94 | -1.09 | 2.52  | 3.10  | 1.79  | -1.04 | -1.17 | -1.29 | -2.73 | 7.41  | -3.50 |
| DHRS10    | 51371  | NM_016246    | 17823 | -1.17 | -1.14 | -1.26 | 1.52  | 0.06  | 0.53  | -1.07 | -1.11 | -1.32 | -3.57 | 2.11  | -3.51 |
| TH1       | 707    | NM_023037    | 17824 | -1.11 | -0.89 | -0.89 | 1.11  | 1.46  | 1.11  | -1.11 | -1.11 | -1.11 | -2.97 | 3.30  | -3.51 |
| AKAP5     | 9495   | NM_004857    | 17825 | -1.08 | -1.40 | -1.30 | 0.05  | 0.64  | 0.17  | -1.04 | -1.33 | -1.14 | -3.78 | 0.87  | -3.51 |
| NEU4      | 129807 | NM_080741    | 17826 | -1.13 | -1.25 | -1.35 | 0.43  | 0.19  | 0.63  | -1.09 | -1.07 | -1.34 | -3.72 | 1.25  | -3.51 |
| GCORP125  | 84308  | NM_012340    | 17827 | -0.95 | -1.07 | -1.27 | 3.34  | 2.31  | 3.42  | -0.89 | -1.39 | -1.23 | -3.29 | 6.07  | -3.51 |
| SPR4      | 63378  | NM_173900    | 17828 | -0.84 | -1.24 | -1.50 | 0.33  | 0.24  | 0.31  | -1.15 | -1.12 | -1.24 | -3.67 | 0.87  | -3.51 |
| FLI2965   | 139422 | NM_182506    | 17829 | -1.17 | -1.21 | -1.62 | 2.15  | 0.88  | 2.10  | -1.09 | -1.10 | -1.33 | -4.01 | 5.12  | -3.52 |
| KRTAP5-3  | 387266 | NM_00101708  | 17830 | -1.05 | -1.19 | -0.83 | 1.15  | 1.55  | 1.59  | -1.20 | -1.16 | -1.16 | -3.07 | 4.29  | -3.52 |
| ND6       | 6580   | NM_139235    | 17831 | -0.90 | -1.28 | -1.25 | 2.01  | 0.17  | 1.80  | -0.97 | -1.12 | -1.42 | -3.53 | 3.98  | -3.52 |
| TRIM17    | 51127  | NM_00102491  | 17832 | -1.38 | -1.40 | -1.57 | -0.11 | -0.12 | -0.34 | -1.11 | -1.13 | -1.27 | -4.35 | 0.58  | -3.52 |
| DNAIC14   | 85406  | NM_032364    | 17833 | -1.47 | -1.62 | -1.42 | -0.41 | 0.86  | 1.92  | -0.71 | -1.31 | -1.50 | -4.51 | 2.37  | -3.52 |
| PCO1      | 79443  | NM_004513    | 17834 | -1.36 | -1.55 | -1.80 | -1.29 | -0.77 | 0.60  | -0.87 | -1.28 | -1.36 | -4.71 | -2.67 | -3.52 |
| CFC       | 1363   | NM_001873    | 17835 | -1.14 | -1.09 | -0.87 | 2.00  | 3.12  | 1.99  | -1.23 | -1.15 | -1.13 | -3.10 | 7.11  | -3.52 |
| COX6C     | 1345   | NM_004374    | 17836 | -1.31 | -1.24 | -1.45 | 0.49  | 0.34  | 0.67  | -1.24 | -1.10 | -1.18 | -4.00 | 1.50  | -3.52 |
| FLR9      | 54108  | NM_138688    | 17837 | -0.92 | -1.17 | -1.16 | 3.61  | 3.86  | 2.61  | -1.04 | -1.28 | -1.20 | -3.25 | 10.08 | -3.52 |
| WBP1      | 23559  | NM_022477    | 17838 | -0.95 | -1.14 | -1.48 | 0.68  | 0.42  | 0.92  | -0.93 | -1.18 | -1.41 | -3.47 | 2.01  | -3.52 |
| C20ORF142 | 128486 | NM_371399    | 17839 | -1.14 | -1.01 | -1.12 | 1.15  | 2.20  | 2.43  | -1.15 | -1.15 | -1.22 | -3.27 | 5.78  | -3.52 |
| NPF       | 8620   | NM_003717    | 17840 | -1.18 | -1.07 | -0.16 | 1.29  | 2.62  | 2.95  | -1.13 | -1.26 | -1.13 | -3.41 | 6.87  | -3.52 |
| LOC10617  | 5617   | NM_024554    | 17841 | -1.28 | -1.30 | -1.20 | 2.89  | 1.20  | 1.89  | -1.13 | -1.20 | -1.10 | -3.60 | 3.21  | -3.52 |
| C20ORF43  | 257169 | NM_152786    | 17842 | -1.17 | -1.42 | -1.30 | 1.67  | 1.50  | 1.37  | -0.93 | -1.26 | -1.33 | -2.89 | 4.54  | -3.53 |
| AKAP4     | 8852   | NM_139289    | 17843 | -0.82 | -0.81 | -0.73 | 2.45  | 2.41  | 2.09  | -1.20 | -1.25 | -1.07 | -2.36 | 6.95  | -3.53 |
| LOC10617  | 5617   | NM_024554    | 17844 | -1.09 | -1.41 | -1.61 | -1.15 | -1.32 | -1.17 | -1.11 | -1.32 | -3.11 | -3.72 | -3.53 |       |
| ZNF24     | 7572   | NM_006965    | 17845 | -1.00 | -1.04 | -1.09 | 7.17  | 4.11  | 2.94  | -1.31 | -1.04 | -1.18 | -2.83 | 9.82  | -3.53 |
| FOXJ2     | 3170   | NM_153675    | 17846 | -0.74 | -0.44 | -1.61 | 1.74  | 2.83  | 3.07  | -1.12 | -0.97 | -1.44 | -1.91 | 4.41  | -3.53 |
| NSBP1     | 79366  | NM_030763    | 17847 | -1.41 | -1.47 | -1.91 | -0.29 | -0.72 | 1.10  | -1.16 | -1.13 | -1.24 | -4.79 | 0.09  | -3.53 |
| ESR2      | 2100   | NM_004937    | 17848 | -0.84 | -1.02 | -1.26 | 1.47  | 1.47  | 1.47  | -0.89 | -1.11 | -1.04 | -3.14 | 6.51  | -3.53 |
| SUMO3     | 6612   | NM_006936    | 17849 | -1.07 | -1.19 | -1.15 | 1.25  | 1.43  | 1.80  | -1.20 | -1.10 | -1.23 | -3.41 | 4.48  | -3.53 |
| TARAZ     | 9287   | NM_014626    | 17850 | -0.84 | -0.98 | -0.41 | 4.73  | 4.59  | 3.72  | -1.20 | -1.19 | -1.15 | -2.23 | 13.04 | -3.53 |
| FOXL2     | 968    | NM_025667    | 17851 | -0.88 | -1.04 | -1.48 | 1.4   | 1.4   | 1.4   | -0.89 | -1.17 | -1.44 | -3.40 | 4.66  | -3.53 |
| LMNA      | 4000   | NM_005572    | 17852 | -1.44 | -1.41 | -1.44 | 0.23  | -0.52 | 0.59  | -1.34 | -1.11 | -1.08 | -4.30 | 0.30  | -3.53 |
| LOC20691  | 92691  | NM_138930    | 17853 | -1.94 | -1.71 | -1.75 | -0.13 | -0.31 | 0.76  | -1.21 | -1.09 | -1.23 | -5.40 | 3.32  | -3.54 |
| TA10      | 6881   | NM_023284    | 17854 | -1.25 | -1.17 | -1.37 | 2.10  | 2.10  | 2.10  | -1.29 | -1.29 | -1.29 | -3.98 | 1.04  | -3.54 |
| FLI2587   | 64410  | NM_022480    | 17855 | -1.34 | -1.79 | -1.25 | 2.13  | 1.18  | 2.23  | -1.31 | -0.98 | -1.25 | -3.38 | 5.59  | -3.54 |
| HNRFP     | 3185   | NM_004966    | 17856 | -1.12 | -0.81 | -1.15 | 1.07  | 1.24  | 1.86  | -1.28 | -1.09 | -1.17 | -3.09 | 4.17  | -3.54 |
| PPI1CA    | 5499   | NM_206873    | 17857 | -0.89 | -0.92 | -0.98 | 2.51  | 5.81  | 3.78  | -1.02 | -1.29 | -1.23 | -2.78 | 12.09 | -3.54 |
| PCNT1     | 23627  | NM_043311    | 17858 | -1.14 | -1.00 | -1.20 | 1.11  | 2.89  | 2.96  | -1.11 | -1.11 | -1.11 | -3.34 | 5.59  | -3.54 |
| MGC4655   | 84752  | NM_033309    | 17859 | -0.84 | -0.86 | -1.01 | 3.27  | 2.38  | 1.16  | -1.22 | -1.20 | -1.12 | -2.71 | 6.82  | -3.54 |
| HACA      | 9759   | NM_006037    | 17860 | -1.02 | -0.49 | -1.28 | 2.31  | 2.05  | 4.27  | -0.92 | -1.04 | -1.59 | -1.98 | 8.62  | -3.54 |
| C20ORF48  | 347350 | NM_153613    | 17861 | -1.12 | -1.24 | -1.24 | 1.12  | 1.12  | 1.12  | -1.12 | -1.12 | -1.12 | -3.00 | 4.00  | -3.54 |
| NALP6     | 171389 | NM_138329    | 17862 | -1.60 | -1.38 | -1.10 | 2.87  | 2.17  | 2.61  | -1.36 | -0.99 | -1.19 | -3.69 | 7.16  | -3.55 |
| FCGR1C    | 1E+08  | NM_00112889  | 17863 | -1.01 | -1.12 | -1.31 | 0.97  | 0.06  | 1.30  | -1.00 | -1.09 | -1.42 | -3.44 | 2.33  | -3.55 |
| IT10      | 181    | NM_023674    | 17864 | -0.55 | -1.11 | -1.37 | 2.10  | 2.10  | 2.10  | -1.24 | -1.09 | -1.24 | -3.02 | 7.00  | -3.55 |
| SYT12     | 91683  | NM_177963    | 17865 | -0.83 | -0.51 | -1.16 | 1.65  | 2.49  | 1.56  | -1.24 | -1.06 | -1.25 | -5.70 | 3.55  | -3.55 |
| C20ORF46  | 55321  | NM_018354    | 17866 | -0.10 | -0.56 | -0.43 | 3.09  | 2.17  | 3.26  | -1.00 | -1.13 | -1.43 | -1.09 | 8.52  | -3.55 |
| MHD5C     | 3033   | NM_025446    | 17867 | -0.98 | -1.44 | -1.27 | 1.81  | 2.25  | 0.77  | -1.07 | -1.41 | -1.08 | -3.68 | 4.83  | -3.56 |
| FCOXL2    | 84893  | NM_178150    | 17868 | -1.07 | -1.36 | -1.49 | 2.04  | 2.04  | 2.04  | -1.14 | -1.24 | -1.64 | -3.60 | 1.62  | -3.56 |
| KIAA201   | 340526 | NM_00102455  | 17869 | -1.07 | -1.17 | -1.27 | 1.99  | 0.74  | 2.31  | -1.17 | -1.18 | -1.20 | -3.83 | 5.04  | -3.56 |
| RAL2A     | 11159  | NM_007282    | 17870 | -1.33 | -1.23 | -1.53 | 0.95  | 1.18  | 1.09  | -1.18 | -1.15 | -1.23 | -3.79 | 3.21  | -3.56 |
| SGC7      | 6487   | NM_005479    | 17871 | -0.94 | -1.13 | -1.49 | 1.10  | 2.10  | 2.10  | -1.12 | -1.12 | -1.12 | -3.50 | 5.08  | -3.56 |
| C20ORF87  | 56129  | NM_018940    | 17872 | -1.14 | -0.86 | -0.98 | 0.50  | 1.39  | 1.77  | -1.01 | -1.32 | -1.23 | -2.97 | 3.66  | -3.56 |
| ELAC1     | 55520  | NM_018696    | 17873 | -1.07 | -1.08 | -1.28 | 0.97  | 2.20  | 1.27  | -1.25 | -1.19 | -1.12 | -3.43 | 4.44  | -3.56 |
| IFIT2     | 3439   | NM_005532    | 17874 | -1.04 | -1.00 | -1.78 | 6.07  | 4.88  | 6.27  | -1.06 | -1.20 | -1.30 | -3.77 | 17.31 | -3.57 |
| ADAM17    | 6868   | NM_003183    | 17875 | -1.00 | -1.37 | -1.01 | 3.93  | 1.78  | 1.50  | -1.21 | -1.26 | -1.09 | -3.80 | 5.61  | -3.57 |
| BLZF1     | 8548   | NM_003666    | 17876 | -0.98 | -1.03 | -0.84 | 2.87  | 3.04  | 3.38  | -1.19 | -1.21 | -1.17 | -2.85 | 9.28  | -3.57 |
| GIF2      | 9815   | NM_139001    | 17877 | -1.15 | -0.69 | -1.04 | 0.93  | 3.20  | 1.13  | -1.29 | -0.96 | -1.31 | -2.88 | 2.24  | -3.57 |
| ALG329    | 985    | NM_018484    | 17878 | -0.59 | -0.57 | -1.08 | 2.24  | 2.24  | 2.24  | -1.07 | -1.17 | -1.17 | -2.65 | 7.65  | -3.57 |
| CD160     | 11126  | NM_007053    | 17879 | -1.13 | -0.92 | -1.18 | 1.10  | 3.20  | 2.28  | -1.06 | -1.19 | -1.31 | -3.23 | 6.58  | -3.57 |
| NHP3      | 11248  | NM_007225    | 17880 | -1.27 | -1.24 | -1.72 | 0.21  | 0.90  | 0.60  | -0.99 | -1.27 | -1.31 | -4.22 | 7.71  | -3.57 |
| SHF       | 2650   | NM_021236    | 17881 | -0.81 | -1.17 | -1.32 | 1.12  | 1.12  | 1.12  | -1.09 | -1.12 | -1.12 | -2.99 | 5.10  | -3.57 |
| SDC3      | 9672   | NM_014654    | 17882 | -1.16 | -1.29 | -1.32 | 2.16  | 2.62  | 3.62  | -1.00 | -1.26 | -1.32 | -4.77 | 8.60  | -3.57 |
| H2AF8     | 83740  | NM_080720    | 17883 | -0.44 | -1.11 | -1.17 | 3.33  | 3.41  | 1.88  | -1.08 | -1.34 | -1.16 | -2.71 | 8.62  | -3.58 |
| C20ORF73  | 20689  | NM_023723    | 17884 | -1.08 | -0.83 | -0.73 | 2.27  | 2.27  | 2.27  | -1.27 | -1.27 | -1.27 | -3.60 | 6.89  | -3.58 |
| PLKX11    | 55111  | NM_018049    | 17885 | -1.11 | -1.22 | -1.48 | 0.99  | -0.21 | 1.15  | -1.15 | -1.14 | -1.29 | -3.81 | 1.92  | -3.58 |
| WASF3     | 10810  | NM_006646    | 17886 | -1.39 | -0.88 | -1.08 | 0.54  | 0.45  | 2.64  | -1.37 | -1.00 | -1.21 | -3.35 | 3.64  | -3.58 |
| DNCL1     | 1790   | NM_004411    | 17887 | -1.29 | -0.96 | -1.59 | 2.34  | 1.84  | 1.97  | -1.18 | -1.02 | -1.38 | -3.83 | 6.15  | -3.58 |
| RG2       | 586    | NM_004761    | 17888 | -0.73 | -0.41 | -1.40 | 2.43  | 1.69  | 2.43  | -1.18 | -0.97 | -1.43 | -2.73 | 5.83  | -3.58 |
| POZK4     | 57995  | NM_032512    | 17889 | -1.00 | -0.58 | -1.43 | 2.40  | 0.62  | 2.76  | -1.33 | -0.83 | -1.42 | -3.00 | 5.78  | -3.58 |
| RCOL5     | 9400   | NM_001039715 | 17890 | -0.80 | -0.90 | -0.79 | 2.46  | 2.56  | 2.00  | -1.09 | -1.21 | -1.28 | -2.49 | 7.78  | -3.59 |
| IFIT4     | 1E+08  | NM_00117801  | 17891 | -1.06 | -1.21 | -1.26 | 1.10  | 1.10  | 1.10  | -1.12 | -1.27 | -1.10 | -3.56 | 2.59  | -3.59 |
| PKNX2     | 80003  | NM_014801    | 17892 | -0.73 | -0.62 | -1.24 | 1.16  | 2.56  | 0.38  | -1.12 | -1.20 | -1.26 | -2.59 | 4.10  | -3.59 |
| APNS1     | 11154  | N            |       |       |       |       |       |       |       |       |       |       |       |       |       |

|           |        |              |       |       |       |       |       |       |       |       |       |       |       |       |       |
|-----------|--------|--------------|-------|-------|-------|-------|-------|-------|-------|-------|-------|-------|-------|-------|-------|
| ZBF89     | 221504 | NM_152735    | 17975 | -1.03 | -0.93 | -1.55 | 2.72  | 1.58  | 2.65  | -1.08 | -1.31 | -1.37 | -3.51 | 6.95  | -3.76 |
| DE5T7     | 56548  | NM_010886    | 17976 | -1.21 | -0.63 | -1.50 | 1.60  | 3.18  | 1.34  | -1.34 | -0.97 | -1.48 | -3.44 | 6.20  | -3.76 |
| FASTK     | 10922  | NM_033015    | 17977 | -1.20 | -1.36 | -1.54 | 2.04  | 1.93  | 2.44  | -1.15 | -1.12 | -1.49 | -4.10 | 6.41  | -3.76 |
| NEDD9     | 4739   | NM_182966    | 17978 | -1.09 | -1.04 | -0.70 | 3.95  | 2.25  | 4.92  | -1.24 | -1.25 | -1.27 | -2.83 | 11.12 | -3.76 |
| DE6S2     | 123999 | NM_206518    | 17979 | -1.41 | -1.15 | -1.53 | -0.08 | 0.42  | 0.09  | -1.15 | -1.28 | -1.34 | -4.09 | 0.44  | -3.76 |
| B4G4L72   | 8704   | NM_001005417 | 17980 | -0.82 | -0.82 | -1.35 | 2.29  | 1.94  | 1.13  | -1.05 | -0.86 | -1.34 | -3.40 | 5.35  | -3.76 |
| SRI       | 6717   | NM_198801    | 17981 | -1.30 | -1.40 | -1.16 | 1.89  | 1.07  | 1.71  | -1.35 | -1.31 | -1.11 | -3.86 | 4.67  | -3.77 |
| ARHGFE6   | 9459   | NM_004840    | 17982 | -1.46 | -1.19 | -1.49 | 1.36  | 2.79  | 1.45  | -1.08 | -1.45 | -1.24 | -4.14 | 5.59  | -3.77 |
| GRS21     | 9549   | NM_138501    | 17983 | -1.15 | -0.86 | -0.98 | 2.05  | 2.65  | 1.79  | -1.12 | -1.29 | -1.19 | -3.22 | 6.49  | -3.77 |
| UTY       | 7404   | NM_182660    | 17984 | -0.81 | -1.03 | -0.92 | 1.53  | 1.50  | 1.05  | -1.19 | -1.46 | -1.13 | -2.76 | 6.08  | -3.78 |
| FUJ1952   | 146857 | NM_144682    | 17985 | -0.93 | -1.00 | -0.89 | 2.55  | 2.22  | 3.22  | -1.16 | -1.28 | -1.34 | -2.82 | 7.99  | -3.78 |
| CSFN      | 30818  | NM_01034814  | 17986 | -1.09 | -1.11 | -1.39 | 1.16  | 2.89  | 1.19  | -1.25 | -1.31 | -1.22 | -3.58 | 4.44  | -3.78 |
| SDC2      | 6383   | NM_002998    | 17987 | -1.24 | -1.33 | -1.56 | 0.83  | 1.12  | 0.72  | -1.21 | -1.20 | -1.38 | -4.14 | 2.68  | -3.78 |
| CTNNB1    | 1499   | NM_001904    | 17988 | -1.05 | -1.01 | -1.07 | 2.78  | 4.23  | 2.91  | -1.13 | -1.32 | -1.34 | -3.13 | 9.92  | -3.79 |
| RA69P40   | 10244  | NM_005833    | 17989 | -0.94 | -1.25 | -1.10 | 2.41  | 3.36  | 5.49  | -1.18 | -1.29 | -1.31 | -3.29 | 11.25 | -3.79 |
| DMPH3     | 81624  | NM_039932    | 17990 | -1.27 | -1.59 | -1.38 | 0.11  | 0.91  | 1.05  | -1.18 | -1.37 | -1.24 | -4.14 | 2.07  | -3.79 |
| CENTG2    | 116987 | NM_014914    | 17991 | -1.33 | -1.22 | -1.73 | 2.09  | 1.29  | 2.33  | -1.22 | -0.98 | -1.59 | -4.28 | 5.72  | -3.79 |
| AMP32D    | 23519  | NM_012404    | 17992 | -1.07 | -1.30 | -1.41 | 1.59  | 1.33  | 1.73  | -1.17 | -1.17 | -1.44 | -3.78 | 4.65  | -3.79 |
| MGC14817  | 84298  | NM_022238    | 17993 | -1.63 | -1.50 | -1.41 | 2.11  | 2.72  | 2.94  | -1.16 | -1.43 | -1.21 | -4.52 | 7.78  | -3.80 |
| KZNC3     | 3777   | NM_002246    | 17994 | -1.14 | -0.97 | -0.68 | 3.12  | 3.20  | 3.74  | -1.28 | -1.29 | -1.23 | -2.79 | 10.07 | -3.81 |
| ZDHHC23   | 254887 | NM_173570    | 17995 | -0.52 | -1.22 | -1.07 | 1.72  | 3.42  | 2.40  | -1.11 | -1.43 | -1.28 | -2.82 | 7.55  | -3.81 |
| PP2R2C    | 5522   | NM_181876    | 17996 | -1.29 | -1.15 | -1.11 | 2.57  | 3.05  | 3.57  | -1.23 | -1.22 | -1.27 | -3.55 | 9.19  | -3.81 |
| JUN       | 3725   | NM_002228    | 17997 | -1.25 | -0.60 | -1.44 | 3.08  | 3.34  | 3.81  | -1.33 | -1.03 | -1.45 | -3.29 | 10.23 | -3.82 |
| PCDH4     | 56144  | NM_031500    | 17998 | -1.18 | -1.23 | -1.10 | 1.65  | 2.96  | 2.69  | -1.22 | -1.27 | -1.34 | -3.52 | 7.30  | -3.82 |
| CSF3      | 1471   | NM_000099    | 17999 | -0.75 | -1.47 | -1.04 | 3.05  | 2.06  | 2.62  | -1.21 | -1.34 | -1.27 | -3.26 | 7.73  | -3.83 |
| MGC20854  | 84260  | NM_032300    | 18000 | -0.90 | -0.96 | -0.78 | 2.64  | 1.93  | 2.71  | -1.36 | -1.24 | -1.22 | -2.63 | 7.29  | -3.83 |
| PEX3      | 8504   | NM_003630    | 18001 | -1.26 | -0.88 | -1.49 | 1.77  | 1.93  | 2.87  | -1.22 | -1.14 | -1.48 | -3.64 | 6.58  | -3.84 |
| RORB      | 6096   | NM_006914    | 18002 | -0.68 | -0.62 | -1.03 | 3.14  | 2.49  | 3.06  | -1.27 | -1.07 | -1.50 | -2.33 | 8.69  | -3.84 |
| SLC4L1    | 247    | NM_003487    | 18003 | -1.25 | -1.26 | -1.51 | 1.90  | 1.25  | 1.92  | -1.15 | -1.16 | -1.29 | -3.01 | 4.12  | -3.84 |
| ADAMT51   | 9510   | NM_006988    | 18004 | -1.37 | -1.01 | -1.45 | 1.44  | 2.24  | 1.33  | -1.28 | -1.13 | -1.43 | -3.82 | 5.01  | -3.85 |
| MVD       | 4597   | NM_002461    | 18005 | -1.19 | -1.17 | -1.42 | 2.45  | 2.80  | 1.86  | -1.28 | -1.10 | -1.47 | -3.78 | 7.11  | -3.85 |
| SLC4L2    | 6521   | NM_003342    | 18006 | -1.16 | -1.16 | -1.28 | 3.13  | 2.40  | 1.86  | -1.33 | -1.19 | -1.34 | -3.60 | 7.40  | -3.86 |
| OR5K4     | 403278 | NM_01005517  | 18007 | -1.28 | -1.18 | -1.38 | 1.85  | 1.94  | 1.24  | -1.40 | -1.21 | -1.25 | -3.84 | 5.04  | -3.86 |
| RASSF4    | 83937  | NM_032023    | 18008 | -1.05 | -1.00 | -0.62 | 6.19  | 4.98  | 5.10  | -1.35 | -1.26 | -1.24 | -2.67 | 16.27 | -3.86 |
| MGC10946  | 80763  | NM_030572    | 18009 | -1.45 | -1.13 | -1.62 | 2.78  | 2.29  | 3.45  | -1.30 | -1.19 | -1.38 | -4.20 | 8.52  | -3.86 |
| NWES1     | 84419  | NM_187955    | 18010 | -1.48 | -1.57 | -1.90 | 0.94  | 0.52  | 2.78  | -1.25 | -1.14 | -1.47 | -4.95 | 4.24  | -3.86 |
| GEORF106  | 64771  | NM_022758    | 18011 | -1.33 | -1.50 | -1.57 | 0.70  | 0.57  | 2.43  | -1.21 | -1.28 | -1.38 | -4.39 | 3.69  | -3.86 |
| PYGB      | 5834   | NM_002862    | 18012 | -1.14 | -0.77 | -1.38 | 3.19  | 2.29  | 2.90  | -1.34 | -1.10 | -1.43 | -3.29 | 8.38  | -3.87 |
| LRX2      | 3985   | NM_01031801  | 18013 | -1.30 | -1.32 | -1.52 | 0.98  | 0.58  | 0.16  | -1.26 | -1.35 | -1.28 | -4.14 | 1.40  | -3.87 |
| SERPIN1   | 1992   | NM_030666    | 18014 | -1.13 | -1.33 | -1.27 | 0.87  | 1.78  | 1.90  | -1.09 | -1.36 | -1.43 | -3.73 | 4.55  | -3.87 |
| NKX1A     | 2516   | NM_004959    | 18015 | -1.19 | -1.18 | -1.26 | 1.25  | 1.53  | 0.62  | -1.20 | -1.38 | -1.29 | -3.62 | 3.41  | -3.87 |
| OR52A5    | 30654  | NM_010305160 | 18016 | -1.20 | -1.05 | -1.50 | 3.44  | 2.86  | 3.03  | -1.24 | -1.18 | -1.46 | -3.75 | 9.34  | -3.88 |
| MGC418    | 11282  | NM_014275    | 18017 | -0.86 | -1.12 | -1.09 | 1.55  | 2.28  | 1.79  | -1.25 | -1.24 | -1.38 | -3.07 | 5.62  | -3.88 |
| ARHGAP8   | 64241  | NM_022437    | 18018 | -0.92 | -1.44 | -1.17 | 3.11  | 1.03  | 2.34  | -1.39 | -1.04 | -1.46 | -3.53 | 6.49  | -3.88 |
| ARCA9     | 10350  | NM_080283    | 18019 | -0.02 | -1.59 | -1.25 | 3.26  | 2.29  | 2.81  | -0.99 | -1.42 | -1.48 | -2.82 | 8.37  | -3.88 |
| LOC294402 | 284402 | NM_01020591  | 18020 | -1.08 | -1.63 | -1.42 | 0.50  | -0.49 | -0.06 | -1.21 | -1.43 | -1.25 | -4.12 | -0.05 | -3.88 |
| ZNF306    | 80317  | NM_024493    | 18021 | -1.32 | -1.16 | -1.56 | 1.81  | 2.12  | 2.03  | -1.39 | -1.22 | -1.28 | -4.04 | 5.96  | -3.90 |
| SMYD1     | 150572 | NM_198274    | 18022 | -1.32 | -1.43 | -1.57 | 1.18  | 1.14  | 1.80  | -1.33 | -0.92 | -1.65 | -4.31 | 4.13  | -3.90 |
| RAL1377   | 57562  | NM_020802    | 18023 | -1.05 | -0.97 | -1.03 | 6.25  | 4.68  | 3.81  | -1.49 | -1.26 | -1.16 | -3.04 | 14.75 | -3.91 |
| SPINK9    | 643394 | NM_001040433 | 18024 | -1.12 | -1.32 | -1.58 | 2.08  | 0.85  | 0.91  | -1.09 | -1.40 | -1.43 | -4.03 | 3.84  | -3.91 |
| MCC1      | 4360   | NM_002438    | 18025 | -1.15 | -1.40 | -1.53 | 1.64  | 1.39  | 2.88  | -1.26 | -1.33 | -1.34 | -4.08 | 5.90  | -3.93 |
| SCD       | 6319   | NM_005063    | 18026 | -1.26 | -1.36 | -1.37 | 1.45  | 2.49  | 2.72  | -1.13 | -1.51 | -1.29 | -3.99 | 6.65  | -3.93 |
| MGC13272  | 84315  | NM_032355    | 18027 | -1.73 | -1.53 | -1.76 | 0.87  | 0.75  | 0.32  | -1.47 | -1.18 | -1.29 | -5.02 | 1.94  | -3.94 |
| SPIN      | 10927  | NM_006717    | 18028 | -1.66 | -1.47 | -1.74 | 1.71  | 1.92  | 1.33  | -1.40 | -1.25 | -1.30 | -4.87 | 4.96  | -3.95 |
| PBX1      | 5087   | NM_002585    | 18029 | -1.31 | -1.34 | -1.32 | 2.53  | 4.52  | 1.64  | -1.13 | -1.46 | -1.36 | -3.96 | 6.69  | -3.95 |
| RBM5      | 10181  | NM_005778    | 18030 | -1.46 | -0.91 | -1.30 | 3.76  | 4.41  | 2.74  | -1.37 | -1.26 | -1.37 | -3.56 | 10.91 | -4.00 |
| RNF32     | 140545 | NM_030936    | 18031 | -1.50 | -1.60 | -1.69 | 0.97  | 1.50  | 0.47  | -1.22 | -1.39 | -1.41 | -4.79 | 2.94  | -4.03 |
| JAMC2     | 3918   | NM_018991    | 18032 | -1.24 | -1.32 | -1.51 | 3.14  | 1.68  | 2.54  | -1.30 | -1.38 | -1.35 | -4.08 | 7.36  | -4.03 |
| MIS1      | 4211   | NM_002398    | 18033 | -1.15 | -1.11 | -1.53 | 1.34  | 1.50  | 2.23  | -1.03 | -0.95 | -2.07 | -4.79 | 5.07  | -4.05 |
| ARHGAP18  | 93663  | NM_033515    | 18034 | -0.96 | -1.33 | -1.42 | 2.31  | 4.86  | 2.36  | -1.25 | -1.37 | -1.44 | -3.71 | 9.52  | -4.07 |
| CACNG5    | 27091  | NM_145811    | 18035 | -1.23 | -0.83 | -1.15 | 4.26  | 5.32  | 4.72  | -1.34 | -1.34 | -1.41 | -3.22 | 14.31 | -4.09 |
| IG2P1     | 2547   | NM_001469    | 18036 | -1.38 | -1.53 | -1.64 | 1.23  | 1.21  | 0.94  | -1.22 | -1.36 | -1.51 | -4.54 | 3.38  | -4.09 |
| SLC4A8    | 9498   | NM_004858    | 18037 | -1.14 | -1.21 | -1.54 | -0.31 | 0.13  | 2.19  | -0.78 | -1.18 | -1.15 | -4.89 | 2.01  | -4.11 |
| HSPE1     | 3336   | NM_002157    | 18038 | -1.29 | -1.62 | -1.53 | 1.33  | 1.81  | 1.98  | -1.25 | -1.37 | -1.50 | -4.43 | 5.12  | -4.11 |
| EP300     | 2033   | NM_001429    | 18039 | -1.33 | -1.54 | -1.28 | 2.74  | 3.22  | 4.04  | -1.16 | -1.40 | -1.56 | -4.15 | 10.00 | -4.12 |
| D15151E   | 7812   | NM_007158    | 18040 | -1.46 | -0.98 | -1.25 | 3.00  | 3.61  | 6.10  | -1.43 | -1.31 | -1.38 | -3.69 | 12.70 | -4.13 |
| LRRCC25   | 126364 | NM_145256    | 18041 | -0.91 | -1.55 | -1.55 | 4.50  | 5.93  | 3.82  | -1.02 | -1.60 | -1.52 | -4.01 | 14.26 | -4.14 |
| CP5F6     | 11602  | NM_007007    | 18042 | -1.38 | -1.07 | -1.78 | 0.45  | 0.45  | 0.27  | -1.31 | -1.18 | -1.65 | -4.24 | 1.17  | -4.14 |
| MPO15     | 4542   | NM_012325    | 18043 | -0.77 | -1.28 | -1.17 | 2.41  | 2.24  | 1.94  | -1.25 | -1.46 | -1.43 | -3.22 | 6.59  | -4.14 |
| CHRNA6    | 8973   | NM_004198    | 18044 | -1.26 | -1.40 | -1.38 | 2.58  | 3.63  | 2.16  | -1.22 | -1.45 | -1.49 | -4.04 | 8.37  | -4.15 |
| CHOB      | 57880  | NM_020920    | 18045 | -1.13 | -1.22 | -1.69 | 1.06  | 1.19  | 1.56  | -1.06 | -1.35 | -1.75 | -4.05 | 3.80  | -4.16 |
| LOC284009 | 284009 | NM_010205459 | 18046 | -1.10 | -1.28 | -1.42 | 3.43  | 3.00  | 3.54  | -1.30 | -1.41 | -1.45 | -3.81 | 9.96  | -4.17 |
| TAS1R3    | 83796  | NM_237210    | 18047 | -1.10 | -1.46 | -1.49 | 3.02  | 3.27  | 2.40  | -1.18 | -1.45 | -1.54 | -4.04 | 7.90  | -4.17 |
| TNFSF13B  | 10673  | NM_006573    | 18048 | -0.60 | -0.96 | -1.53 | 2.93  | 2.04  | 3.25  | -1.32 | -1.22 | -1.66 | -3.09 | 8.21  | -4.19 |
| OKL38     | 29948  | NM_182981    | 18049 | -1.64 | -1.44 | -1.73 | 2.72  | 2.24  | 2.17  | -1.49 | -1.27 | -1.47 | -4.81 | 7.13  | -4.21 |
| RASSF6    | 166634 | NM_177532    | 18050 | -1.15 | -1.20 | -1.42 | 5.18  | 4.14  | 4.21  | -1.47 | -1.22 | -1.62 | -3.77 | 13.53 | -4.31 |
| LOC388595 | 388595 | NM_001013641 | 18051 | -1.85 | -1.63 | -1.80 | 2.00  | 1.45  | 3.40  | -1.54 | -1.24 | -1.55 | -5.27 | 6.85  | -4.32 |
| SLC22A15  | 5003   | NM_007105    | 18052 | -1.39 | -1.71 | -1.77 | 0.30  | 0.66  | 1.95  | -1.23 | -1.54 | -1.56 | -4.87 | 2.92  | -4.33 |
| DPMG11    | 1798   | NM_203616    | 18053 | -1.30 | -1.39 | -1.80 | 0.80  | 1.33  | 2.06  | -1.21 | -1.52 | -1.80 | -4.57 | 4.26  | -4.52 |
| SORD      | 6652   | NM_003104    | 18054 | -1.29 | -1.35 | -2.30 | 2.19  | 2.12  | 0.97  | -1.33 | -     |       |       |       |       |
