# Supplementary material
Source: PubMed Central journal article supplement (PMC4651756)
Supplement: NIHMS729683-supplement-6.pdf [file NIHMS729683-supplement-6.pdf]

**Supplemental Table 3.** Validation screen utilizing the custom siRNA library. The table contains the average  $\gamma$ H2AX, EdU, and RRS values for each siRNA tested. Also included are the RRS log<sub>2</sub> ratio (compared to NT control), and the FDR p-value. The screen was performed in triplicate.

| Gene Symbol | Gene ID | siRNA Sequence        | Plate ID | Well Name | Total #cells | $\gamma$ H2AX Average | EdU Average | RRS Average  | RRS log2Ratio | RRS wilcox.pFDR | RRS Validated (p-value<=0.1) | # siRNAs per gene validated |
|-------------|---------|-----------------------|----------|-----------|--------------|-----------------------|-------------|--------------|---------------|-----------------|------------------------------|-----------------------------|
| ABCB8       | 11194   | CAACUCUCUCUCUCUCUCUUU | Plate 1  | M19       | 213          | 211.33                | 199.37      | 2.1711641276 | 0.926584581   | 6.39            | 0                            | 1                           |
| ABCB8       | 11194   | GCUCUCUCUCUCUCUCUAAAG | Plate 1  | N19       | 1260         | 93.95                 | 358.52      | 0.475237781  | -1.265162769  | 0.14283594      | 0                            | 0                           |
| ABCB8       | 11194   | CAACACCGUCUCUCUCUGAA  | Plate 1  | O19       | 1286         | 110.25                | 385.99      | 0.498883751  | -1.195108622  | 0.131337828     | 0                            | 0                           |
| ABCB8       | 11194   | CUGUCUCUCUCUCUCUCGAA  | Plate 1  | P19       | 464          | 50.15                 | 393.91      | 0.39391805   | -1.535916776  | 0.010501413     | 0                            | 0                           |
| ABCC10      | 89845   | GCAGAGCCUCUCUCUCUAAU  | Plate 4  | E15       | 964          | 79.69                 | 262.52      | 0.824960611  | -0.435905706  | 1.31E-14        | 0                            | 1                           |
| ABCC10      | 89845   | GUUCUCUCUCUCUCUCUUAU  | Plate 4  | F15       | 1467         | 46.05                 | 239.33      | 0.340028141  | -1.76455931   | 0.000202065     | 0                            | 0                           |
| ABCC10      | 89845   | GCAGAGCCUCUCUCUCUUAU  | Plate 4  | G15       | 1467         | 46.05                 | 239.33      | 0.340028141  | -1.76455931   | 0.000202065     | 0                            | 0                           |
| ABCC10      | 89845   | UGAGUCUCUCUCUCUCUUAU  | Plate 4  | H15       | 1011         | 45.52                 | 170.53      | 0.593582257  | -0.960765493  | 0.0000014       | 0                            | 0                           |
| ABCC5       | 10057   | CGACUUAAGGAAAGAGAUU   | Plate 2  | E11       | 194          | 148.19                | 414.19      | 1.428942615  | 0.243443715   | 0.000132778     | 1                            | 3                           |
| ABCC5       | 10057   | UGCGAAGGUCUCUCUCUGAAU | Plate 2  | F11       | 681          | 201.23                | 116.86      | 2.135094868  | 0.625827365   | 4.81E-102       | 1                            | 1                           |
| ABCC5       | 10057   | UGAACUCUCUCUCUCUCUAAU | Plate 2  | G11       | 631          | 116.10                | 227.34      | 1.124678017  | -0.098962744  | 8.2E-21         | 0                            | 0                           |
| ABCC5       | 10057   | CUGAAGCCUCUCUCUCUGAAU | Plate 2  | H11       | 1033         | 277.38                | 17.79       | 4.17570928   | -1.793549064  | 2.6E-65         | 0                            | 0                           |
| ACIN1       | 22985   | GGAAGGCGACGAGAAAGCGA  | Plate 5  | M13       | 661          | 94.16                 | 333.02      | 0.460753466  | -1.291923231  | 0.800035994     | 0                            | 0                           |
| ACIN1       | 22985   | AGGAUGAGACAGACGGUUA   | Plate 5  | N13       | 1009         | 74.48                 | 236.55      | 0.528310448  | -1.09446969   | 1.77E-18        | 0                            | 0                           |
| ACIN1       | 22985   | GCAGAGCGGAAAGCGGAA    | Plate 5  | O13       | 848          | 121.31                | 381.94      | 0.490379977  | -1.201955553  | 0.019734357     | 0                            | 0                           |
| ACIN1       | 22985   | GCAGAGCGGAAAGCGGAA    | Plate 5  | P13       | 889          | 48.92                 | 306.18      | 0.267740351  | -2.075021045  | 0.01136743      | 0                            | 0                           |
| ACSM2B      | 348158  | CGAUUAACUCUCUCUCUUAU  | Plate 4  | M9        | 1470         | 122.66                | 346.53      | 0.700585655  | -0.271652014  | 0.000221217     | 0                            | 2                           |
| ACSM2B      | 348158  | GCAGUCUCUCUCUCUCUUAU  | Plate 4  | N9        | 1135         | 167.51                | 190.23      | 1.686264753  | 0.45545698    | 5.65E-38        | 1                            | 1                           |
| ACSM2B      | 348158  | CACACGUCUCUCUCUCUUAU  | Plate 4  | O9        | 760          | 184.87                | 389.17      | 0.795489815  | -0.538370002  | 0.62613079      | 0                            | 0                           |
| ACSM2B      | 348158  | AGUGAAGUCUCUCUCUGAA   | Plate 4  | P9        | 1404         | 149.05                | 171.58      | 1.739230411  | 0.590163700   | 1.96E-40        | 1                            | 1                           |
| ADAM29      | 11086   | GAAAGAGUCUCUCUCUUAU   | Plate 1  | E6        | 231          | 134.51                | 346.91      | 0.955517498  | -0.25753001   | 0.000000455     | 0                            | 0                           |
| ADAM29      | 11086   | GAAUAACUCUCUCUCUUAU   | Plate 1  | F6        | 1404         | 135.87                | 371.62      | 0.631931255  | -0.854044679  | 0.013850082     | 0                            | 0                           |
| ADAM29      | 11086   | UGACAGAAUUCUCUCUUAU   | Plate 1  | G6        | 684          | 94.58                 | 219.68      | 1.034073351  | -0.143545724  | 1.11E-28        | 0                            | 0                           |
| ADAM29      | 11086   | GAAUAUCUCUCUCUCUUAU   | Plate 1  | H6        | 1721         | 119.41                | 320.41      | 0.708860647  | -0.688310261  | 1.35E-10        | 0                            | 0                           |
| AGXT2L1     | 64850   | GAAAGAGCCCAAGUAGA     | Plate 3  | M17       | 1216         | 36.11                 | 136.25      | 0.585515007  | -0.944117188  | 2.35E-20        | 0                            | 0                           |
| AGXT2L1     | 64850   | GAAAGUCUCUCUCUCUUAU   | Plate 3  | N17       | 1175         | 48.82                 | 404.96      | 0.360862983  | -1.642372155  | 0.000000196     | 0                            | 0                           |
| AGXT2L1     | 64850   | GCUCUCUCUCUCUCUUAU    | Plate 3  | O17       | 1012         | 80.29                 | 442.21      | 0.315717222  | -1.835197213  | 6.56E-96        | 0                            | 0                           |
| AGXT2L1     | 64850   | GUUUAUCUCUCUCUCUUAU   | Plate 3  | P17       | 773          | 40.08                 | 343.86      | 0.346540541  | -1.700798748  | 1.1E-41         | 0                            | 0                           |
| AHCY        | 191     | UCAAGUAGGAGGAGGUGU    | Plate 5  | A16       | 1092         | 85.37                 | 317.54      | 0.499992043  | -1.173850492  | 0.012196599     | 0                            | 2                           |
| AHCY        | 191     | GAGCAGGUCUCUCUCUUAU   | Plate 5  | B16       | 1043         | 71.75                 | 347.13      | 0.375817984  | -1.585821521  | 0.082828394     | 0                            | 0                           |
| AHCY        | 191     | GCAGCAGGUCUCUCUCUUAU  | Plate 5  | C16       | 182          | 297.58                | 107.84      | 5.068290565  | 2.167571705   | 2.14E-44        | 0                            | 0                           |
| AHCY        | 191     | CGAAACGAGCAGGAGU      | Plate 5  | D16       | 287          | 74.41                 | 152.48      | 1.551560915  | 0.459792807   | 1.76E-41        | 1                            | 1                           |
| AIRE        | 326     | GAAAGUAGGAGGAGGUGU    | Plate 6  | E3        | 1456         | 68.84                 | 330.99      | 0.419032591  | -1.470290468  | 0.006172785     | 0                            | 2                           |
| AIRE        | 326     | GUUCUCUCUCUCUCUCUUAU  | Plate 6  | F3        | 586          | 155.27                | 115.44      | 3.053162374  | 1.394879486   | 4.86E-86        | 0                            | 0                           |
| AIRE        | 326     | UGAGUCUCUCUCUCUCUUAU  | Plate 6  | G3        | 803          | 82.58                 | 278.36      | 0.638682347  | -0.862254349  | 3.29E-19        | 0                            | 0                           |
| AIRE        | 326     | CACAGCUCUCUCUCUCUUAU  | Plate 6  | H3        | 829          | 197.03                | 162.25      | 2.529755242  | 1.23572978    | 2.24E-88        | 0                            | 0                           |
| AKAP8L      | 26993   | GCAAAUUCGAGCAGCUCUUA  | Plate 1  | M4        | 751          | 58.51                 | 492.74      | 0.277806784  | -2.039730472  | 1.38E-08        | 0                            | 0                           |
| AKAP8L      | 26993   | GAAAGGUCUCUCUCUCUUAU  | Plate 1  | N4        | 1335         | 127.46                | 348.33      | 0.72448002   | -0.50080337   | 7.68E-11        | 0                            | 0                           |
| AKAP8L      | 26993   | JAGAAUUCGUCUCUCUUAU   | Plate 1  | O4        | 1088         | 62.22                 | 192.98      | 0.820054547  | -0.478092427  | 2.53E-14        | 0                            | 0                           |
| AKAP8L      | 26993   | CGUAUCGUCUCUCUCUUAU   | Plate 1  | P4        | 80           | 75.26                 | 169.96      | 1.132555867  | -0.012301969  | 1.49E-15        | 0                            | 0                           |
| AKR1C1      | 1645    | AAACAGAAUCGUCUCUUAU   | Plate 4  | A5        | 908          | 144.68                | 133.61      | 1.666197968  | 0.528274456   | 5.23E-72        | 1                            | 3                           |
| AKR1C1      | 1645    | CGAAUUCGUCUCUCUUAU    | Plate 4  | B5        | 1134         | 81.39                 | 364.19      | 0.414609437  | -1.479460509  | 3.7E-26         | 0                            | 0                           |
| AKR1C1      | 1645    | GCAAAUUCGUCUCUCUUAU   | Plate 4  | C5        | 1158         | 323.73                | 98.25       | 8.595767371  | 2.895341072   | 6.92E-220       | 0                            | 0                           |
| AKR1C1      | 1645    | GCACUUAUCGUCUCUUAU    | Plate 4  | D5        | 522          | 193.55                | 281.66      | 1.631271978  | 0.497711972   | 0.00000095      | 1                            | 1                           |
| ALB         | 213     | CGAGUUAUCGUCUCUUAU    | Plate 2  | A10       | 1177         | 115.97                | 511.02      | 0.645655177  | -0.899636428  | 5.83E-18        | 0                            | 1                           |
| ALB         | 213     | CGAAGAGGUCUCUCUUAU    | Plate 2  | B10       | 349          | 433.13                | 419.17      | 1.970067771  | 0.709773029   | 4.53E-28        | 0                            | 0                           |
| ALB         | 213     | GAUUCGUCUCUCUCUUAU    | Plate 2  | C10       | 1144         | 133.47                | 442.08      | 0.514764913  | -1.226486582  | 1.45E-08        | 0                            | 0                           |
| ALB         | 213     | GGUGUCUCUCUCUCUUAU    | Plate 2  | D10       | 814          | 131.88                | 439.70      | 0.845218543  | -0.900612402  | 0.000000001     | 0                            | 0                           |
| ALKBH5      | 54890   | UGAAUUCGUCUCUCUUAU    | Plate 1  | E8        | 1621         | 136.22                | 735.22      | 0.349822516  | -1.707189153  | 2.98E-82        | 0                            | 1                           |
| ALKBH5      | 54890   | GAACUCUCUCUCUCUCUUAU  | Plate 1  | F8        | 142          | 100.25                | 206.50      | 1.113550463  | -0.036717269  | 4.96E-23        | 0                            | 0                           |
| ALKBH5      | 54890   | GAGAAUCUCUCUCUCUUAU   | Plate 1  | G8        | 1217         | 134.49                | 305.63      | 0.850361356  | -0.812507065  | 2.57E-26        | 0                            | 0                           |
| ALKBH5      | 54890   | GGCGAAGGUCUCUCUUAU    | Plate 1  | H8        | 35           | 95.40                 | 160.70      | 2.113991981  | 0.888085607   | 8.11E-10        | 0                            | 1                           |
| ALPL        | 249     | CUAAGAAUCGUCUCUUAU    | Plate 4  | E13       | 66           | 29.67                 | 311.63      | 0.375052764  | -1.62311989   | 3.48E-13        | 0                            | 0                           |
| ALPL        | 249     | CUAACAGCUCUCUCUUAU    | Plate 4  | F13       | 290          | 101.78                | 282.19      | 0.820579492  | -0.8959744    | 8.78E-11        | 0                            | 0                           |
| ALPL        | 249     | GCAGUUCGUCUCUCUUAU    | Plate 4  | G13       | 354          | 75.52                 | 352.02      | 0.499607796  | -1.209417502  | 0.000365756     | 0                            | 0                           |
| ALPL        | 249     | CAGAGCUCUCUCUCUUAU    | Plate 4  | H13       | 813          | 101.84                | 310.38      | 0.643986557  | -0.843182861  | 0.001380771     | 0                            | 0                           |
| ALPP        | 250     | CGSAAAGCUCUCUCUUAU    | Plate 4  | E10       | 73           | 107.88                | 330.81      | 1.205770923  | 0.061670477   | 0.000000291     | 1                            | 3                           |
| ALPP        | 250     | CUAACAGCUCUCUCUUAU    | Plate 4  | F10       | 892          | 283.43                | 283.48      | 1.319806798  | 0.192041387   | 3.34E-74        | 0                            | 0                           |
| ALPP        | 250     | GCAGCAGCUCUCUCUUAU    | Plate 4  | G10       | 202          | 97.61                 | 166.04      | 1.177233757  | 0.02711545    | 1.63E-08        | 0                            | 0                           |
| ALPP        | 250     | CUACGAGCUCUCUCUUAU    | Plate 4  | H10       | 169          | 68.03                 | 201.37      | 0.750098653  | -0.623132726  | 3.2E-10         | 0                            | 0                           |
| ALS2CL      | 259173  | GCAGCUCUCUCUCUCUUAU   | Plate 5  | A5        | 636          | 128.99                | 479.46      | 0.603101847  | -0.903453973  | 0.191345713     | 0                            | 1                           |
| ALS2CL      | 259173  | GAGCUCUCUCUCUCUUAU    | Plate 5  | B5        | 42           | 193.77                | 423.21      | 2.211060036  | 0.970810667   | 0.000446041     | 0                            | 0                           |
| ALS2CL      | 259173  | GCAGCUCUCUCUCUCUUAU   | Plate 5  | C5        | 370          | 44.18                 | 655.17      | 0.80351688   | -2.109863148  | 1.48E-32        | 0                            | 0                           |
| ALS2CL      | 259173  | ACUCUCUCUCUCUCUUAU    | Plate 5  | D5        | 1414         | 102.28                | 299.50      | 0.609048916  | -0.88929776   | 0.455712194     | 0                            | 0                           |
| ANKMY2      | 57037   | CGAAGAAUCGUCUCUUAU    | Plate 5  | A4        | 711          | 443.05                | 246.05      | 2.929982064  | 1.376964301   | 1.23E-123       | 1                            | 3                           |
| ANKMY2      | 57037   | GAGCUCUCUCUCUCUUAU    | Plate 5  | B4        | 686          | 195.51                | 217.57      | 1.86605222   | 0.728095073   | 1.79E-58        | 1                            | 1                           |
| ANKMY2      | 57037   | CACAGCUCUCUCUCUUAU    | Plate 5  | C4        | 249          | 177.15                | 185.06      | 1.702080809  | 0.593372001   | 4E-28           | 1                            | 1                           |
| ANKMY2      | 57037   | CGAAUUCGUCUCUCUUAU    | Plate 5  | D4        | 1419         | 194.77                | 401.69      | 0.779235445  | -0.533796325  | 0.055527627     | 0                            | 0                           |
| ANKRD55     | 79722   | GAGUCUCUCUCUCUCUUAU   | Plate 1  | A20       | 504          | 55.80                 | 158.15      | 0.596278049  | -0.97827074   | 0.511427322     | 0                            | 0                           |
| ANKRD55     | 79722   | GAGAGCUCUCUCUCUUAU    | Plate 1  | B20       | 1609         | 144.70                | 279.95      | 1.006663834  | -0.182302219  | 8.29E-38        | 0                            | 0                           |
| ANKRD55     | 79722   | GCAGCUCUCUCUCUCUUAU   | Plate 1  | C20       | 553          | 139.71                | 247.41      | 0.805759176  | -0.503463589  | 0.00000204      | 0                            | 0                           |
| ANKRD55     | 79722   | GAAAGCUCUCUCUCUUAU    | Plate 1  | D20       | 930          | 153.03                | 120.74      | 2.22272567   | 0.960445664   | 1.6E-165        | 1                            | 1                           |
| ANKS3       | 124401  | GCAGCUCUCUCUCUCUUAU   | Plate 2  | A17       | 511          | 38.15                 | 261.15      | 0.550366003  | -1.129949971  | 0.0000004       | 0                            | 0                           |
| ANKS3       | 124401  | GAGCUCUCUCUCUCUUAU    | Plate 2  | B17       | 101          | 128.80                | 279.14      | 1.125347876  | -0.098101162  | 2.68E-14        | 0                            | 0                           |
| ANKS3       | 124401  | GAAUUCGUCUCUCUUAU     | Plate 2  | C17       | 1520         | 93.74                 | 217.12      | 0.948983664  | -0.34401705   | 3.15E-28        | 0                            | 0                           |
| ANKS3       | 124401  | CGAAGAGCUCUCUCUUAU    | Plate 2  | D17       | 684          | 171.81                | 75.65       | 3.914778788  | 1.700458579   | 5.83E-138       | 1                            | 1                           |
| ANO10       | 55129   | AGACUUAUCGUCUCUUAU    | Plate 3  | E6        | 1125         | 155.11                | 337.79      | 1.820406513  | 0.692365432   | 0.085368242     | 0                            | 0                           |
| ANO10       | 55129   | GAAAGAGCUCUCUCUUAU    | Plate 3  | F6        | 1537         | 90.91                 | 283.82      | 0.559146706  | -1.010596458  | 0.560766721     | 0                            | 0                           |
| ANO10       | 55129   | GAUGAAUCUCUCUCUUAU    | Plate 3  | G6        | 1213         | 215.77                | 336.69      | 1.057178274  | -0.09167654   | 2.27E-18        | 0                            | 0                           |
| ANO10       | 55129   | GCUCUCUCUCUCUCUUAU    | Plate 3  | H6        | 1591         | 95.22                 | 220.09      | 0.781952111  | -0.526743061  | 1.9E-18         | 0                            | 0                           |
| ANOS        | 338440  | CGCGCAACUCUCUCUUAU    | Plate 4  | E9        | 1059         | 63.10                 | 175.34      | 0.696868747  | -0.729326509  | 1.58E-44        | 0                            | 2                           |
| ANOS        | 338440  | CGAGCUCUCUCUCUCUUAU   | Plate 4  | F9        | 36           | 128.31                | 111.54      | 1.307808274  | 0.17886792    | 2.48E-49        | 0                            | 0                           |
| ANOS        | 338440  | GCAGCUCUCUCUCUCUUAU   | Plate 4  | G9        | 718          | 64.23                 | 98.98       | 1.282400559  | 0.150561582   | 6.68E-76        | 1                            | 1                           |
| ANOS        | 338440  | GUACUCUCUCUCUCUUAU    | Plate 4  | H9        | 89           | 112.88                | 196.26      | 1.035770441  | -0.15781076   | 3.47E-13        | 0                            | 0                           |
| ANXA4       | 307     | GALGAGCUCUCUCUCUUAU   | Plate 1  | M13       | 598          | 56.77                 | 657.30      | 0.206177328  | -2.489926603  | 1.49E-25        | 0                            | 2                           |
| ANXA4       | 307     | GAGCUCUCUCUCUCUUAU    | Plate 1  | N13       | 26           | 106.70                | 45.88       | 1.928615447  | 0.754184431   | 0.00000119      | 0                            | 0                           |
|             |         |                       |          |           |              |                       |             |              |               |                 |                              |                             |

|           |        |                      |         |     |      |        |        |             |              |             |   |
|-----------|--------|----------------------|---------|-----|------|--------|--------|-------------|--------------|-------------|---|
| ARL5A     | 26225  | GCGCAUGAGGACCUAAGAA  | Plate 4 | L3  | 776  | 84.56  | 191.24 | 1.108420539 | -0.059780019 | 2.45E-09    | 0 |
| ATF6B     | 1388   | GAACUGUCUCUCCAUUGU   | Plate 4 | A7  | 154  | 210.23 | 313.76 | 1.363237416 | 0.238751471  | 2.74E-08    | 1 |
| ATF6B     | 1388   | GAGAAGUCACCCUCCAGU   | Plate 4 | B7  | 92   | 258.50 | 250.20 | 1.924413789 | 0.736133674  | 1.24E-22    | 2 |
| ATF6B     | 1388   | GCUAACCCUCCGCAAAUG   | Plate 4 | C7  | 836  | 67.94  | 189.83 | 0.728463542 | -0.665356693 | 0.00000291  | 0 |
| ATF6B     | 1388   | GAGCUCUUGCUGACCAUUG  | Plate 4 | D7  | 1175 | 63.56  | 213.54 | 0.515517384 | -1.164192383 | 0.318309735 | 0 |
| ATP5G3    | 518    | GCUCUACGGUUAUUUAUGG  | Plate 1 | I3  | 1388 | 106.07 | 357.18 | 0.509587907 | -1.16448126  | 0.031796249 | 0 |
| ATP5G3    | 518    | CAGCAGAGACAUUGAUACU  | Plate 1 | J3  | 1011 | 107.41 | 226.22 | 0.928860766 | -0.298349946 | 0.031316596 | 0 |
| ATP5G3    | 518    | AGAGUUGCAUACAGACCAA  | Plate 1 | K3  | 461  | 80.59  | 226.37 | 0.92049812  | -0.311397527 | 1.95E-13    | 0 |
| ATP5G3    | 518    | CAGCUAUCGCAAGGGAGU   | Plate 1 | L3  | 1391 | 119.67 | 293.05 | 0.772220235 | -0.564799943 | 1.35E-22    | 0 |
| BAT5      | 7920   | GGAAAGGUUAUCUUGAGU   | Plate 1 | M5  | 1331 | 94.78  | 379.17 | 0.425543664 | -1.424505131 | 0.010493249 | 0 |
| BAT5      | 7920   | UCACUAUGCGGACCAUUG   | Plate 1 | N5  | 1474 | 133.29 | 400.84 | 0.662978992 | -0.784849145 | 0.150872052 | 0 |
| BAT5      | 7920   | CGGAACCCAGUCUUCAGAAA | Plate 1 | O5  | 457  | 165.18 | 529.81 | 1.11947166  | -0.038759567 | 0.075193634 | 0 |
| BAT5      | 7920   | GCUCUUGGGAUACCAUUGC  | Plate 1 | P5  | 1310 | 121.15 | 436.87 | 1.056442496 | -0.112669966 | 0.140141073 | 0 |
| BDH2      | 56898  | GAACUGUCUCCGUAUUGUA  | Plate 1 | M18 | 1356 | 106.72 | 296.05 | 0.679753766 | -0.748800062 | 2.62E-12    | 0 |
| BDH2      | 56898  | UGAUGAUCGUCGUAUUGUA  | Plate 1 | N18 | 1467 | 136.20 | 352.36 | 0.718130762 | -0.669565739 | 0.00186365  | 0 |
| BDH2      | 56898  | GACUUGAUGUCUUCUUUA   | Plate 1 | O18 | 734  | 80.18  | 358.39 | 0.539553209 | -1.082047062 | 1.11E-21    | 1 |
| BDH2      | 56898  | GCAUAUUAUACCAUUGC    | Plate 1 | P18 | 747  | 197.50 | 371.00 | 1.384545725 | 0.277528493  | 5.49E-18    | 1 |
| BEND3     | 57673  | CAACUGAAUACCCGGAAGA  | Plate 4 | M11 | 909  | 223.50 | 332.29 | 1.175663455 | 0.025189767  | 8.53E-13    | 1 |
| BEND3     | 57673  | GCAACUAUGGAGGAGGUCUA | Plate 4 | N11 | 1300 | 203.41 | 86.61  | 0.646631394 | 2.007801038  | 1.09E-29    | 1 |
| BEND3     | 57673  | GGCAGCGAUGGCGGUCGUA  | Plate 4 | O11 | 135  | 99.45  | 177.33 | 1.766711813 | 0.612781358  | 7.27E-14    | 1 |
| BEND3     | 57673  | CCGCAAGGCUACAGCAGAU  | Plate 4 | P11 | 308  | 257.17 | 369.58 | 1.854380069 | 0.682651598  | 7.52E-13    | 1 |
| BMP3      | 651    | GAAAGGACUGUAUUCU     | Plate 5 | E15 | 1219 | 76.50  | 383.51 | 0.342953282 | -1.717843564 | 1.02E-48    | 0 |
| BMP3      | 651    | GAAAGGACUGUAUUCU     | Plate 5 | F15 | 1075 | 29.62  | 257.13 | 0.259595827 | -2.119588432 | 0.0000301   | 0 |
| BMP3      | 651    | CAAGGUCUCGUAACCAUUG  | Plate 5 | G15 | 332  | 34.26  | 229.80 | 0.71356509  | -0.660810591 | 0.00000099  | 0 |
| BMP3      | 651    | GAUUGAAGCCUCCGGAUUG  | Plate 5 | H15 | 752  | 24.21  | 262.90 | 0.521556366 | -1.113032451 | 0.003463579 | 0 |
| BOK       | 666    | GGCCAGGUCUACCCGCAA   | Plate 2 | M4  | 1523 | 105.93 | 271.83 | 0.845750251 | -0.510168603 | 9.58E-10    | 1 |
| BOK       | 666    | UGAUGAUCGUCGUAUUGUA  | Plate 2 | N4  | 1344 | 156.90 | 178.71 | 1.53030162  | 0.345343825  | 4.98E-100   | 1 |
| BOK       | 666    | GAUGGACUGAUGCCUCAA   | Plate 2 | O4  | 599  | 312.92 | 358.50 | 2.373056197 | 0.978274057  | 1.22E-11    | 1 |
| BOK       | 666    | GGAGCGCGCCGAGCGUGC   | Plate 2 | P4  | 1296 | 67.67  | 360.50 | 0.325000439 | -1.889958636 | 7.44E-31    | 0 |
| C11orf45  | 219833 | GGAUGUGCAUGCCAUAGUA  | Plate 1 | E13 | 855  | 213.40 | 168.83 | 2.147837588 | 0.911000699  | 1.99E-69    | 1 |
| C11orf45  | 219833 | GAGGAGAACCUCUUCUGCA  | Plate 1 | F13 | 1051 | 134.94 | 279.70 | 0.798314698 | -0.516854728 | 1.67E-14    | 0 |
| C11orf45  | 219833 | GCUGAGCUCUGCCGUCUAC  | Plate 1 | G13 | 1315 | 101.92 | 161.11 | 1.091735657 | -0.06526063  | 1.84E-75    | 0 |
| C11orf45  | 219833 | GCAACGUGCUGAUGCCUUA  | Plate 1 | H13 | 648  | 49.56  | 468.15 | 0.235187714 | -2.279999603 | 4.66E-24    | 0 |
| C12orf54  | 121273 | AGACACAGCUCUUCAGUCA  | Plate 1 | A7  | 217  | 143.99 | 213.02 | 0.969250603 | -0.236942574 | 1.68E-21    | 0 |
| C12orf54  | 121273 | GCAGAGAAGCACAUCCAU   | Plate 1 | B7  | 891  | 177.63 | 273.24 | 1.023008353 | -0.159066283 | 4.52E-37    | 0 |
| C12orf54  | 121273 | UUAUCACCCUGGACCCUAA  | Plate 1 | C7  | 1235 | 231.79 | 277.18 | 1.81093937  | 0.664854039  | 5.97E-46    | 1 |
| C12orf54  | 121273 | ACAAGGACCCAGGAGAA    | Plate 1 | D7  | 1237 | 217.92 | 367.15 | 1.243004733 | 0.121947583  | 2.04E-25    | 1 |
| C14orf39  | 317761 | GUUCACAUUAUCGACUUA   | Plate 5 | A12 | 1138 | 342.77 | 272.42 | 2.617864492 | 1.214462889  | 1.13E-120   | 1 |
| C14orf39  | 317761 | GCUCUGAAUUCGUAUUAU   | Plate 5 | B12 | 129  | 185.62 | 837.38 | 0.761917555 | -0.566220731 | 0.241621161 | 0 |
| C14orf39  | 317761 | GAGUUAUCUUCUAGAUCA   | Plate 5 | C12 | 1320 | 46.29  | 229.99 | 0.374287027 | -1.591710584 | 2.51E-21    | 0 |
| C14orf39  | 317761 | UAGGUAUACCCGAAUUAU   | Plate 5 | D12 | 1434 | 60.24  | 451.94 | 0.022317378 | -2.337688088 | 1.29E-109   | 0 |
| C14orf80  | 283643 | GGUGCUAGCUGGACUACAG  | Plate 4 | I7  | 245  | 101.24 | 132.50 | 1.93857952  | 0.746713381  | 3.01E-15    | 1 |
| C14orf80  | 283643 | GUUGGACUUCGUAUUGUA   | Plate 4 | J7  | 704  | 95.13  | 258.19 | 0.896841141 | -0.365361002 | 1.45E-24    | 0 |
| C14orf80  | 283643 | GCUGGUGAGACGAGGAGU   | Plate 4 | K7  | 51   | 194.00 | 222.42 | 1.721392396 | 0.575290633  | 0.000000851 | 1 |
| C14orf80  | 283643 | UAGCGUAGCCGAGGACUAC  | Plate 4 | L7  | 1102 | 121.72 | 105.91 | 2.380496812 | 1.042977329  | 1.28E-137   | 1 |
| C16orf57  | 79650  | GAGAAAACCCGAGCCUUAU  | Plate 6 | M3  | 496  | 141.69 | 517.98 | 0.590898176 | -0.974443379 | 0.052215786 | 1 |
| C16orf57  | 79650  | AAUUAACCCUUCGUAUUAU  | Plate 6 | N3  | 68   | 111.79 | 124.91 | 2.323802025 | 1.001062334  | 4.78E-23    | 0 |
| C16orf57  | 79650  | AGGCAGAGUAUUCGAGUAC  | Plate 6 | O3  | 271  | 157.04 | 389.92 | 1.197297643 | 0.044357013  | 4.87E-24    | 1 |
| C16orf57  | 79650  | CGUAUAGCCUUCUCCUACA  | Plate 6 | P3  | 234  | 50.23  | 105.60 | 0.869651412 | -0.416915693 | 4.17E-28    | 0 |
| C16orf73  | 254528 | CUACACAGUUAACAAUUA   | Plate 5 | A10 | 214  | 336.16 | 168.29 | 4.787114664 | 2.085228831  | 7.31E-41    | 1 |
| C16orf73  | 254528 | GCAAGGAGUAUUCGAGCU   | Plate 5 | B10 | 477  | 191.32 | 357.69 | 1.166091197 | 0.047753091  | 9.02E-15    | 1 |
| C16orf73  | 254528 | CAGCAACUGUAUUCUCAA   | Plate 5 | C10 | 1312 | 133.72 | 238.19 | 1.356569094 | 0.266034999  | 0.00000216  | 1 |
| C16orf73  | 254528 | CAGCUGUAGUUAUCACUA   | Plate 5 | D10 | 910  | 29.99  | 435.62 | 0.339874441 | -1.730853753 | 1.84E-23    | 0 |
| C17orf58  | 284018 | GGCAGCAGUUAUUGUAUGA  | Plate 5 | I8  | 1507 | 229.74 | 172.39 | 2.512787938 | 1.155361391  | 5.3E-129    | 1 |
| C17orf58  | 284018 | CCACAUUCUUCGUAUUGUA  | Plate 5 | J8  | 1491 | 72.22  | 230.40 | 0.26022789  | -0.768974746 | 0.077946483 | 0 |
| C17orf58  | 284018 | GUGAAAAGGUUAUUCGAA   | Plate 5 | K8  | 1580 | 143.29 | 249.12 | 1.077452464 | -0.066303311 | 1.01E-31    | 0 |
| C17orf58  | 284018 | UAGCCGUGGUCGAGGUAU   | Plate 5 | L8  | 696  | 138.44 | 375.36 | 0.630630427 | -0.839060848 | 0.000612659 | 0 |
| C17orf90  | 339229 | GCACGUGGUGAUGAGAAC   | Plate 4 | E8  | 1008 | 26.12  | 265.66 | 0.245375631 | -2.235221484 | 2.48E-26    | 0 |
| C17orf90  | 339229 | GGACAGACCCUAGGAGGU   | Plate 4 | F8  | 1425 | 44.81  | 270.56 | 0.281330106 | -2.037949516 | 0.00099069  | 0 |
| C17orf90  | 339229 | GGAGGUGGCGAGUUCUUC   | Plate 4 | G8  | 1096 | 71.51  | 257.99 | 0.47047953  | -1.296081507 | 0.01993242  | 0 |
| C17orf90  | 339229 | ACAACGUGGUCGUAUUGA   | Plate 4 | H8  | 1023 | 102.46 | 294.63 | 0.525037866 | -1.137791987 | 0.000172603 | 0 |
| C19orf57  | 79173  | GGACGUCUUCGACUUCGAA  | Plate 1 | A9  | 1361 | 108.29 | 352.43 | 0.688826753 | -0.729671127 | 0.028451186 | 0 |
| C19orf57  | 79173  | GAACACCUACCAAGCAUUG  | Plate 1 | B9  | 267  | 33.97  | 145.51 | 0.530464697 | -1.10655556  | 6.26E-20    | 0 |
| C19orf57  | 79173  | GAUCUUAUUCGGGAGUUA   | Plate 1 | C9  | 940  | 116.04 | 585.26 | 0.455287941 | -1.327033053 | 1.08E-20    | 0 |
| C19orf57  | 79173  | CGAGUUAUGGUCGACGAA   | Plate 1 | D9  | 432  | 176.68 | 382.39 | 1.046068334 | -0.126907108 | 3.76E-12    | 0 |
| C20orf152 | 140894 | GGAGACAUUAGGUAACUUA  | Plate 4 | A19 | 1428 | 143.99 | 408.46 | 0.548723258 | -1.074134735 | 0.000000617 | 2 |
| C20orf152 | 140894 | ACACGACCCUUGAUCUGA   | Plate 4 | B19 | 722  | 242.27 | 244.60 | 2.147101003 | 0.89410471   | 1.6E-10     | 1 |
| C20orf152 | 140894 | CCUGGGAUUAUGAUGUAU   | Plate 4 | C19 | 1076 | 89.23  | 167.07 | 1.004121215 | -0.202351929 | 8.92E-52    | 1 |
| C20orf152 | 140894 | UAGCGUAGGUCGAGGUAU   | Plate 4 | D19 | 1326 | 177.75 | 153.58 | 2.63492439  | 1.189476196  | 4.29E-55    | 0 |
| C22orf15  | 150248 | GGGACACCUUCUCCUUAU   | Plate 3 | I19 | 253  | 218.36 | 128.76 | 4.797041824 | 2.090249796  | 2.12E-51    | 1 |
| C22orf15  | 150248 | GACCCUAGGUAUUCGUAU   | Plate 3 | J19 | 370  | 88.97  | 561.47 | 0.337070862 | -1.740771399 | 0.001646679 | 0 |
| C22orf15  | 150248 | GAGCAAGCCUCCUUAUUA   | Plate 3 | K19 | 220  | 586.63 | 66.04  | 19.54420496 | 4.116773771  | 1.47E-82    | 1 |
| C22orf15  | 150248 | GAAGGAGGAGGAGGUAU    | Plate 3 | L19 | 1141 | 97.90  | 221.32 | 0.693004589 | -0.700958412 | 5.42E-10    | 0 |
| C2orf69   | 205327 | GCAGGUGACUAGCCAAUUA  | Plate 3 | M16 | 116  | 72.71  | 221.59 | 1.927532528 | 0.774859984  | 1.46E-20    | 1 |
| C2orf69   | 205327 | GGAUUAUCUUCAGGUGUUC  | Plate 3 | N16 | 787  | 261.59 | 284.13 | 2.140725788 | 0.926204787  | 3.51E-08    | 1 |
| C2orf69   | 205327 | CAGUAAAGUUGUGUUGU    | Plate 3 | O16 | 155  | 84.01  | 45.33  | 2.00672822  | 0.832950017  | 1.58E-44    | 1 |
| C2orf69   | 205327 | GGAAGCAUUAUCUUGGUAU  | Plate 3 | P16 | 967  | 96.82  | 350.18 | 0.467422454 | -1.269096276 | 0.0000168   | 0 |
| CABIN1    | 23523  | GAACACAGCCACGAGUAU   | Plate 2 | I20 | 530  | 75.38  | 243.70 | 0.516737515 | -1.220968678 | 5.28E-09    | 1 |
| CABIN1    | 23523  | GGAGAGGUAUUCGUGGCA   | Plate 2 | J20 | 328  | 40.03  | 198.41 | 0.420370085 | -1.518740299 | 0.0000149   | 0 |
| CABIN1    | 23523  | GGAUUAUUCGUGGACUUA   | Plate 2 | K20 | 1409 | 226.54 | 232.76 | 1.800808751 | 0.580172764  | 3.58E-93    | 1 |
| CABIN1    | 23523  | GAUGCAACCUUCGUAUUA   | Plate 2 | L20 | 1745 | 104.30 | 232.67 | 0.923327275 | -0.38358199  | 0.003833729 | 0 |
| CACNA1S   | 779    | GAAUACAGUUAUUAACA    | Plate 1 | A19 | 680  | 102.99 | 367.55 | 0.473152712 | -1.271506408 | 4.48E-08    | 0 |
| CACNA1S   | 779    | GCACGGCACUACGUAUUA   | Plate 1 | B19 | 1383 | 54.92  | 191.74 | 0.511444293 | -1.159235192 | 2.59E-32    | 0 |
| CACNA1S   | 779    | CCACUGAGGUGCUACUUC   | Plate 1 | C19 | 417  | 123.37 | 448.37 | 0.798697762 | -0.516162631 | 0.074080011 | 0 |
| CACNA1S   | 779    | UCUAGUUAUUAUUAUUA    | Plate 1 | D19 | 1121 | 61.70  | 127.93 | 0.800357476 | -0.513167786 | 7.01E-92    | 0 |
| CACNG6    | 59285  | GGUCCAAUCUUCUUCUGCA  | Plate 3 | E17 | 260  | 344.68 | 196.12 | 4.401496655 | 1.96609895   | 2.38E-34    | 1 |
| CACNG6    | 59285  | GGCUGAUCUUCGUAUUGG   | Plate 3 | F17 | 977  | 265.39 | 186.14 | 2.490353261 | 1.144455184  | 1.02E-74    | 1 |
| CACNG6    | 59285  | CCUACAAAGCCACAGGCA   | Plate 3 | G17 | 145  | 139.91 | 203.45 | 1.129326929 | 0.003567971  | 6.33E-14    | 1 |
| CACNG6    | 59285  | AGUUCUGGUGGUCGAGCUA  | Plate 3 | H17 | 991  | 39.33  | 494.45 | 1.088241524 | -2.58123841  | 1.89E-88    | 0 |
| CAD       | 790    | GAGGGUCUUCUUAUAGUA   | Plate 5 | M5  | 625  | 133.08 | 672.98 | 0.570569832 | -0.983452158 | 2.16E-16    | 1 |
| CAD       | 790    | GGAAGGAGUAUAGGUAUGA  | Plate 5 | N5  | 602  | 81.33  | 302.87 | 0.839116326 | -0.426984803 | 0.633423912 | 0 |

|         |        |                        |         |     |      |        |        |             |              |             |   |   |
|---------|--------|------------------------|---------|-----|------|--------|--------|-------------|--------------|-------------|---|---|
| CCDC22  | 28952  | GCAGAGAGCUGGAAUCUUC    | Plate 3 | E21 | 1211 | 181.61 | 233.75 | 1.110596358 | -0.020560652 | 4.94E-15    | 0 | 0 |
| CCDC22  | 28952  | GGAAAGAGGAGGCUAUAA     | Plate 3 | F21 | 607  | 97.59  | 355.77 | 0.924909092 | -0.284511745 | 0.071406158 | 0 | 0 |
| CCDC22  | 28952  | CCACUCGCGUGGUUAG       | Plate 3 | G21 | 1560 | 82.02  | 222.32 | 0.607094328 | -0.891902622 | 0.145291692 | 0 | 0 |
| CCDC22  | 28952  | GAGGCGCUAAUAGUUCUA     | Plate 3 | H21 | 1774 | 119.98 | 360.18 | 0.649932928 | -0.793532474 | 0.452890782 | 0 | 0 |
| CCPG1   | 9236   | AAACGAACCUUGCUACAGA    | Plate 5 | I17 | 724  | 64.65  | 357.85 | 0.415749546 | -1.440140937 | 0.022268279 | 0 | 1 |
| CCPG1   | 9236   | GUUAAUGGUGAGUCAGUUA    | Plate 5 | J17 | 207  | 160.26 | 281.70 | 1.452433604 | 0.364544683  | 6.56E-24    | 1 | 1 |
| CCPG1   | 9236   | GAUUGUAGUUGAGGCAAA     | Plate 5 | K17 | 659  | 168.90 | 390.77 | 0.9020285   | -0.32268261  | 1.05E-12    | 0 | 0 |
| CCPG1   | 9236   | CCGAAGACAGUUCUUAU      | Plate 5 | L17 | 28   | 188.85 | 183.41 | 1.002143516 | -0.170838401 | 7.62E-08    | 0 | 0 |
| CDH26   | 60437  | CUGAUUGUGGAGCUCUUU     | Plate 3 | E15 | 1021 | 177.04 | 305.43 | 1.041723463 | -0.112922873 | 1.01E-25    | 0 | 3 |
| CDH26   | 60437  | GAAGGAGGCGAGACAUU      | Plate 3 | F15 | 231  | 294.78 | 267.97 | 1.725754385 | 0.615331928  | 2.69E-31    | 1 | 1 |
| CDH26   | 60437  | GAUUAAGGAUCGAGGAA      | Plate 3 | G15 | 251  | 156.80 | 211.81 | 1.261314156 | 0.163032431  | 4.55E-33    | 1 | 1 |
| CDH26   | 60437  | UGAGCCAGGAAGUGGAAA     | Plate 3 | H15 | 1379 | 284.47 | 128.81 | 4.057744551 | 1.848782823  | 2.62E-218   | 1 | 1 |
| CDYL    | 9425   | GAGAGACGAGUAGUUCUGA    | Plate 3 | A8  | 1329 | 78.47  | 206.54 | 0.83949226  | -0.424306294 | 4.98E-13    | 0 | 2 |
| CDYL    | 9425   | GAAACUUCGUGAAUUCUUU    | Plate 3 | B8  | 1060 | 134.72 | 454.12 | 0.578074407 | -0.962568115 | 0.072359842 | 1 | 0 |
| CDYL    | 9425   | GACUUCUAAUUGCCUCUUU    | Plate 3 | C8  | 338  | 102.11 | 97.64  | 2.052043835 | 0.865166328  | 4.37E-71    | 1 | 0 |
| CDYL    | 9425   | GACAAGCGAUUGCGUUUUA    | Plate 3 | D8  | 579  | 323.49 | 117.91 | 4.969205754 | 2.141120057  | 4.95E-157   | 1 | 1 |
| CENPL   | 91687  | GGACAUUUCUUUCGCAUA     | Plate 2 | I13 | 1305 | 70.96  | 245.03 | 0.456786534 | -1.398880184 | 0.000000174 | 0 | 1 |
| CENPL   | 91687  | AAGAUUAGUUCGUGUUUA     | Plate 2 | J13 | 542  | 170.71 | 471.35 | 0.823802035 | -0.548102614 | 1.2E-13     | 1 | 0 |
| CENPL   | 91687  | GCAAUCAUAGUUAUAUC      | Plate 2 | K13 | 1561 | 150.86 | 181.67 | 1.33539473  | 0.148794043  | 5.9E-103    | 1 | 0 |
| CENPL   | 91687  | UUAUUGGAGUGUUAAGCAU    | Plate 2 | L13 | 1423 | 43.00  | 126.45 | 0.843368862 | -0.514236547 | 1.01E-47    | 1 | 0 |
| CEP19   | 84984  | UAGAGUAGCUGUUCAGUUU    | Plate 5 | A7  | 1159 | 294.06 | 316.16 | 1.903729586 | 0.754901035  | 1.45E-67    | 1 | 3 |
| CEP19   | 84984  | GAACAAUUCUAAACGGGAA    | Plate 5 | B7  | 1142 | 137.62 | 406.21 | 0.703316445 | -0.681681676 | 0.000494191 | 0 | 0 |
| CEP19   | 84984  | AAAUUCGCGCAGCGCAUA     | Plate 5 | C7  | 166  | 235.04 | 248.57 | 2.152790731 | 0.932280552  | 1.17E-25    | 1 | 0 |
| CEP19   | 84984  | AAGAAUUAUCCCGCAGACA    | Plate 5 | D7  | 721  | 143.41 | 93.87  | 4.812356597 | 2.092816019  | 7.62E-22    | 1 | 1 |
| CETN2   | 1069   | GAGAGACCGUAGUUCUGA     | Plate 3 | E4  | 856  | 75.87  | 333.02 | 0.678126157 | -0.732269623 | 0.019264844 | 0 | 1 |
| CETN2   | 1069   | GAACUGGCACCAUAGUUG     | Plate 3 | F4  | 414  | 102.40 | 326.59 | 0.803497611 | -0.487529583 | 1.33E-18    | 1 | 0 |
| CETN2   | 1069   | GAGAAACUCGGGAGAUUU     | Plate 3 | G4  | 145  | 105.46 | 244.43 | 1.152476606 | 0.032842245  | 1.21E-14    | 1 | 0 |
| CETN2   | 1069   | GCAUCUAGUUCUACAGCGAA   | Plate 3 | H4  | 1557 | 118.84 | 258.87 | 0.784570682 | -0.521919891 | 2.29E-24    | 1 | 0 |
| CHEK1   | 1111   | GCAACAGUUAUUCGCAUA     | Plate 1 | A4  | 60   | 792.86 | 99.89  | 20.44853008 | 4.162041028  | 8.01E-33    | 1 | 4 |
| CHEK1   | 1111   | GGACUUCUCUCCAGUAAAC    | Plate 1 | B4  | 105  | 651.84 | 126.39 | 10.1991607  | 3.158494324  | 6.1E-45     | 1 | 1 |
| CHEK1   | 1111   | AAAGUAGAUUGUUAACAA     | Plate 1 | C4  | 640  | 604.88 | 72.73  | 16.61053443 | 3.862142379  | 0           | 1 | 1 |
| CHEK1   | 1111   | AGAUUAGAACGUGCCGUA     | Plate 1 | D4  | 907  | 427.99 | 148.96 | 5.04221841  | 2.142174405  | 3.11E-275   | 1 | 1 |
| CHERP   | 10523  | GAGCGAAUUCUUCAGUUA     | Plate 1 | E11 | 19   | 29.20  | 51.69  | 0.990452938 | -0.205723875 | 0.000153634 | 0 | 2 |
| CHERP   | 10523  | CGUGGAGAUACACAGUAC     | Plate 1 | F11 | 500  | 62.13  | 174.97 | 0.93412024  | -0.290204037 | 5.82E-49    | 1 | 0 |
| CHERP   | 10523  | GACCGUAGUAGGCAUAA      | Plate 1 | G11 | 250  | 137.52 | 176.04 | 2.071274385 | 0.858634475  | 1.63E-38    | 1 | 0 |
| CHERP   | 10523  | GAUAGUGGAGCAGUUAU      | Plate 1 | H11 | 391  | 295.94 | 142.76 | 4.580231195 | 2.003536216  | 6.51E-97    | 1 | 1 |
| CHRNE   | 1145   | ACACAGAGCCUUAUCUGA     | Plate 3 | I17 | 1120 | 94.25  | 212.76 | 0.628905456 | -0.840980165 | 1.07E-18    | 0 | 0 |
| CHRNE   | 1145   | CAUUAUUGAGGCGCAUUC     | Plate 3 | J17 | 154  | 99.78  | 285.72 | 0.533357305 | -1.078720974 | 1.17E-11    | 0 | 0 |
| CHRNE   | 1145   | CGUCGUGGUGGCUUAUU      | Plate 3 | K17 | 428  | 124.78 | 355.84 | 0.67401058  | -0.74105208  | 0.61035012  | 0 | 0 |
| CHRNE   | 1145   | UGGCAGGAUUAACCGACUA    | Plate 3 | L17 | 1109 | 101.63 | 231.07 | 0.706892855 | -0.672331757 | 9.39E-61    | 1 | 0 |
| CLEC3B  | 7123   | GAUCUGCGGUGGCUUCUA     | Plate 5 | M9  | 70   | 718.57 | 166.82 | 5.627917724 | 2.318673706  | 1.4E-24     | 1 | 1 |
| CLEC3B  | 7123   | GCGAUACGUGCCUUCUAU     | Plate 5 | N9  | 234  | 66.64  | 387.03 | 0.480140445 | -1.232399158 | 0.239828355 | 0 | 0 |
| CLEC3B  | 7123   | GAACGCGCCUUCUUAUAG     | Plate 5 | O9  | 1183 | 64.88  | 348.32 | 0.35014786  | -1.687891357 | 0.00000018  | 0 | 0 |
| CLEC3B  | 7123   | GCAAGUGUUCGCAAGCG      | Plate 5 | P9  | 213  | 94.72  | 154.02 | 0.875560923 | -0.365648059 | 4.85E-28    | 1 | 0 |
| CLEC4M  | 10332  | GAUGUAGCUGUUCGCAUA     | Plate 5 | I5  | 296  | 335.71 | 105.94 | 6.435270207 | 2.512073194  | 1.09E-97    | 1 | 2 |
| CLEC4M  | 10332  | GCAAUUCUUAUAAAGUUC     | Plate 5 | J5  | 996  | 139.99 | 316.48 | 0.855419601 | -0.399223362 | 8.8E-33     | 0 | 0 |
| CLEC4M  | 10332  | GUGGAGAACCCCAUAAUAG    | Plate 5 | K5  | 452  | 59.77  | 241.51 | 1.778184712 | 0.656477663  | 5.3E-39     | 1 | 0 |
| CLEC4M  | 10332  | GCAUUCGAGUUGGAGUUC     | Plate 5 | L5  | 1433 | 113.05 | 258.66 | 0.971921364 | -0.215016033 | 4.31E-22    | 0 | 0 |
| CLIC3   | 9022   | GAGAAAGUAGUUAUUAUC     | Plate 2 | M7  | 954  | 286.06 | 248.26 | 2.207474566 | 0.873924607  | 1.22E-82    | 1 | 2 |
| CLIC3   | 9022   | GCAUCUUCGACACCGGUG     | Plate 2 | N7  | 1414 | 118.68 | 238.32 | 0.814657558 | -0.564206556 | 1.2E-23     | 1 | 0 |
| CLIC3   | 9022   | CGGACGUGGAGGCAUUA      | Plate 2 | O7  | 59   | 774.54 | 191.50 | 9.578404364 | 2.991313133  | 6.18E-23    | 1 | 0 |
| CLIC3   | 9022   | CAGACCGUGCAGAUUGA      | Plate 2 | P7  | 1400 | 109.94 | 306.05 | 0.646120312 | -0.898597475 | 0.161366335 | 0 | 0 |
| CLOCK   | 9575   | CAAGAAGGUGGAGUUAUUA    | Plate 5 | I9  | 754  | 95.00  | 302.04 | 0.650733192 | -0.793789484 | 2.38E-19    | 0 | 1 |
| CLOCK   | 9575   | CGUGGAAUGGAGUUAUUA     | Plate 5 | J9  | 1446 | 247.54 | 415.08 | 0.987398019 | -0.192223876 | 1.76E-27    | 1 | 0 |
| CLOCK   | 9575   | GGACAAUUCUUCUUCUG      | Plate 5 | K9  | 535  | 348.87 | 308.43 | 1.953893215 | 0.792424091  | 3.87E-67    | 1 | 0 |
| CLOCK   | 9575   | GAGUUAUUAUUAUUAUUA     | Plate 5 | L9  | 1361 | 131.82 | 272.04 | 0.744581489 | -0.599425877 | 0.000000475 | 0 | 0 |
| CLSPN   | 63967  | GGAAUUCGUGGAGUUAUUA    | Plate 3 | I12 | 154  | 195.65 | 100.99 | 2.921553876 | 1.374840672  | 9.79E-54    | 1 | 4 |
| CLSPN   | 63967  | GGAGUUAUUAUUAUUAUUA    | Plate 3 | J12 | 325  | 235.60 | 146.87 | 5.49942252  | 2.287384911  | 8.48E-95    | 1 | 1 |
| CLSPN   | 63967  | GAGGAGUUAUUAUUAUUA     | Plate 3 | K12 | 552  | 122.07 | 230.88 | 1.615669912 | 0.520237258  | 3.33E-44    | 1 | 1 |
| CLSPN   | 63967  | GAUUAUUAUUAUUAUUA      | Plate 3 | L12 | 136  | 365.67 | 77.48  | 7.266190252 | 2.689303919  | 5.76E-65    | 1 | 1 |
| CNTF    | 1270   | UAUCUGACUUCUUCAGUUA    | Plate 4 | I8  | 1293 | 167.33 | 106.08 | 3.279145237 | 1.505034434  | 1.16E-116   | 1 | 2 |
| CNTF    | 1270   | GAUAGAGGAGUUAUUAUUA    | Plate 4 | J8  | 1474 | 93.80  | 253.96 | 0.711927851 | -0.698482421 | 0.699518428 | 0 | 0 |
| CNTF    | 1270   | GUGGAGGAGUUCGCUUAUA    | Plate 4 | K8  | 474  | 57.01  | 264.03 | 0.370275738 | -1.641613441 | 0.00000065  | 0 | 0 |
| CNTF    | 1270   | GCAUUAUUAUUAUUAUUA     | Plate 4 | L8  | 523  | 409.99 | 140.67 | 6.526102186 | 2.49793621   | 1.26E-155   | 1 | 1 |
| CPSF2   | 53981  | UAUGGAGGUGGAGCAUAU     | Plate 1 | I21 | 1161 | 167.04 | 80.51  | 2.495182607 | 1.127261194  | 3.03E-271   | 1 | 4 |
| CPSF2   | 53981  | GAUCAGAUUUGGAGGACUA    | Plate 1 | J21 | 702  | 356.75 | 90.35  | 5.621235763 | 2.299003118  | 3.42E-200   | 1 | 1 |
| CPSF2   | 53981  | UUGGAGUAGUUGGUGCUUA    | Plate 1 | K21 | 1112 | 297.03 | 104.89 | 2.895858417 | 1.342106861  | 2.17E-282   | 1 | 0 |
| CPSF2   | 53981  | GACUGUGGUAUUAUUAUUA    | Plate 1 | L21 | 447  | 276.42 | 52.33  | 5.824898688 | 2.350371289  | 7.3E-186    | 1 | 1 |
| CRYAA   | 1409   | GAGGUGCAGGAGGAGUUA     | Plate 2 | E13 | 1180 | 319.42 | 288.66 | 1.999323993 | 0.731040073  | 5.32E-37    | 1 | 2 |
| CRYAA   | 1409   | GGACAAUGUUCGUCUUCUUC   | Plate 2 | F13 | 1599 | 91.42  | 265.93 | 0.584451517 | -1.043316953 | 0.000000819 | 0 | 0 |
| CRYAA   | 1409   | GGGACAAUGUUCGUCUUCUUC  | Plate 2 | G13 | 393  | 32.05  | 212.32 | 0.702523562 | -0.77785369  | 6.36E-26    | 0 | 0 |
| CRYAA   | 1409   | GCAUCCAGCCGGGCAAGUUA   | Plate 2 | H13 | 45   | 185.06 | 69.00  | 2.585090094 | 1.101742353  | 3.98E-15    | 1 | 1 |
| CSPG5   | 10675  | CAUCUGAGCUCGCAAGUUA    | Plate 1 | I10 | 990  | 91.61  | 427.17 | 0.341299772 | -1.742772851 | 0.403259342 | 0 | 1 |
| CSPG5   | 10675  | GGAGCCUUCGUCGUAUUA     | Plate 1 | J10 | 1330 | 130.40 | 321.38 | 0.762930294 | -0.582261052 | 0.690076745 | 0 | 0 |
| CSPG5   | 10675  | GAGAAUCCAGCUGGUGUA     | Plate 1 | K10 | 1121 | 148.98 | 179.98 | 1.530756724 | 0.422360813  | 1.21E-65    | 1 | 1 |
| CSPG5   | 10675  | CAUCAGAUUAUUAUUAUUA    | Plate 1 | L10 | 1012 | 155.96 | 351.54 | 0.997587136 | -0.19536944  | 0.002393205 | 0 | 0 |
| CSTF1   | 1477   | GCGAAGCUGGAGGAGUUA     | Plate 1 | M7  | 1369 | 46.89  | 467.75 | 0.186595747 | -2.6138962   | 3.95E-20    | 0 | 0 |
| CSTF1   | 1477   | UAUGUAGAGUAGGACAGUUA   | Plate 1 | N7  | 1322 | 129.67 | 318.02 | 1.053121176 | -0.117212759 | 4.76E-10    | 0 | 0 |
| CSTF1   | 1477   | GGACCGGUGGAGUUAUUA     | Plate 1 | O7  | 1102 | 54.02  | 349.29 | 0.364148178 | -1.649286675 | 0.02582319  | 0 | 0 |
| CSTF1   | 1477   | GGAUGGUGUUAUUAUUAUUA   | Plate 1 | P7  | 1477 | 93.42  | 280.76 | 0.739610308 | -0.627046971 | 1.18E-08    | 0 | 0 |
| CXCL3   | 2921   | AUCCAAAGGUGUUAUUAUUA   | Plate 2 | I6  | 1655 | 297.60 | 269.39 | 3.01711158  | 1.324695843  | 2.67E-77    | 1 | 1 |
| CXCL3   | 2921   | UCCAAAGGUGGAGUUAUUA    | Plate 2 | J6  | 1547 | 148.23 | 337.46 | 0.890492655 | -0.435796592 | 0.832149346 | 0 | 0 |
| CXCL3   | 2921   | GAAAGAGUUAUUAUUAUUA    | Plate 2 | K6  | 1640 | 107.09 | 298.73 | 0.760422718 | -0.663598671 | 0.016433007 | 0 | 0 |
| CXCL3   | 2921   | UGUCCAUUCGUGGAGUUAUUA  | Plate 2 | L6  | 1027 | 55.74  | 255.41 | 0.447870643 | -1.427318201 | 0.092976549 | 0 | 0 |
| CYBASC3 | 220002 | GACUGGUGGUGGUGGCUUU    | Plate 2 | E8  | 868  | 77.84  | 117.01 | 1.309131878 | 0.120138229  | 6.16E-94    | 1 | 1 |
| CYBASC3 | 220002 | GCAUCUACAUUGUUAUUAUUA  | Plate 2 | F8  | 517  | 96.61  | 395.99 | 0.449478189 | -1.422149195 | 0.522524466 | 0 | 0 |
| CYBASC3 | 220002 | GAGGAGGUGGAGUUAUUAUUA  | Plate 2 | G8  | 687  | 100.31 | 203.65 | 1.054916457 | -0.191343458 | 2.87E-47    | 0 | 0 |
| CYBASC3 | 220002 | GGAGGUGGUGGAGUUAUUAUUA | Plate 2 | H8  | 680  | 310.28 | 566.03 | 0.945728701 | -0.348973923 | 2.08E-12    | 0 | 0 |
| CYBB    | 1536   | GAGACAAUUCGUG          |         |     |      |        |        |             |              |             |   |   |

|         |        |                     |         |     |      |         |         |             |              |             |   |
|---------|--------|---------------------|---------|-----|------|---------|---------|-------------|--------------|-------------|---|
| DDT     | 1652   | UAGGGACGGUCAUGACUUU | Plate 2 | J14 | 961  | 88.89   | 345.84  | 0.429930727 | -1.486296079 | 0.000000446 | 0 |
| DDT     | 1652   | GAGGUGGACAGAAUUUUG  | Plate 2 | K14 | 1496 | 154.44  | 237.95  | 1.04669547  | -0.202630449 | 2.09E-29    | 0 |
| DDT     | 1652   | UUGGAGUCUGGACGUAUUG | Plate 2 | L14 | 1174 | 136.56  | 461.94  | 0.53300476  | -1.176251887 | 1.17E-11    | 0 |
| DDX1    | 1653   | GAUGUACCGGUAUUAAGA  | Plate 3 | I3  | 1262 | 102.22  | 258.83  | 0.737889864 | -0.610417819 | 0.098870943 | 0 |
| DDX1    | 1653   | CUACUAGGUGUAGCUUAAA | Plate 3 | J3  | 682  | 95.27   | 546.79  | 0.381881994 | -1.56069642  | 3.65E-15    | 0 |
| DDX1    | 1653   | GUACAACGAGUAGCAGUUA | Plate 3 | K3  | 47   | 253.54  | 108.08  | 6.201591761 | 2.460743337  | 1.1E-14     | 1 |
| DDX1    | 1653   | UAAAGGCCAUGGUAUUAU  | Plate 3 | L3  | 460  | 70.76   | 202.45  | 1.135788203 | 0.01179861   | 0.000000293 | 1 |
| DENND2C | 163259 | GAGGUUAUCUGGUAUGUUA | Plate 3 | I14 | 1326 | 121.04  | 441.05  | 0.447937611 | -1.33052551  | 5.56E-27    | 0 |
| DENND2C | 163259 | GUAGGACAAUUCAGAAUUA | Plate 3 | J14 | 1425 | 92.81   | 210.64  | 0.849219986 | -0.407684992 | 7.44E-19    | 0 |
| DENND2C | 163259 | CCAUACAGUUAAGAGUUA  | Plate 3 | K14 | 518  | 128.34  | 281.72  | 1.017583634 | -0.146747849 | 4.24E-11    | 0 |
| DENND2C | 163259 | GGUAUGUUAUCAGGAAUA  | Plate 3 | L14 | 1333 | 31.72   | 202.39  | 0.334794016 | -1.750549576 | 0.143738509 | 0 |
| DESI1   | 27351  | CCGAUUCUUAUCGCGGUGA | Plate 3 | M7  | 1255 | 122.63  | 228.18  | 0.905666875 | -0.314842825 | 2.36E-15    | 0 |
| DESI1   | 27351  | CAACUCUUUUGAACCAUA  | Plate 3 | N7  | 665  | 51.18   | 237.15  | 0.495204643 | -1.185798476 | 0.000724101 | 0 |
| DESI1   | 27351  | CAACGAGGUGGACAGUUC  | Plate 3 | O7  | 3    | #DIV/0! | #DIV/0! | 2.595283829 | 1.203997103  | 0.243974483 | 0 |
| DESI1   | 27351  | GAUGAGUUCUUCGCGGCA  | Plate 3 | P7  | 1097 | 181.73  | 121.17  | 2.774023664 | 1.300084873  | 1.82E-124   | 1 |
| DGAT2   | 84649  | UCACUUGGUGGUGUUUA   | Plate 2 | A8  | 942  | 44.38   | 438.30  | 0.218712229 | -2.461366416 | 2.3E-36     | 0 |
| DGAT2   | 84649  | GCAGGCAACUUCGGAUUG  | Plate 2 | B8  | 1562 | 119.72  | 311.17  | 0.659457566 | -0.869120474 | 0.001903856 | 0 |
| DGAT2   | 84649  | GCCGAGGUGGUCAGAAUA  | Plate 2 | C8  | 13   | 50.00   | 106.00  | 1.005242662 | -0.260928404 | 0.009777737 | 0 |
| DGAT2   | 84649  | GCAAGCUUAUCAGGCUU   | Plate 2 | D8  | 1045 | 60.00   | 277.28  | 0.443333415 | -1.442008197 | 1.42E-10    | 0 |
| DGKZ    | 8525   | GGACAGCUUUCUGAGCUU  | Plate 4 | E6  | 482  | 400.23  | 379.15  | 1.998475986 | 0.79061487   | 2.59E-44    | 1 |
| DGKZ    | 8525   | GAAAUUACAACAGCCGCUU | Plate 4 | F6  | 742  | 175.05  | 302.19  | 0.997205793 | -0.212322199 | 6.72E-11    | 0 |
| DGKZ    | 8525   | CAACGAGGUGGCAAGAUUC | Plate 4 | G6  | 362  | 93.04   | 381.61  | 0.556735539 | -1.053221283 | 0.105594712 | 0 |
| DGKZ    | 8525   | GAUCGCAAGGAUAGAAUA  | Plate 4 | H6  | 1596 | 104.09  | 222.55  | 0.824598265 | -0.486522036 | 2.34E-18    | 0 |
| DHCR7   | 1717   | GGCCAAGACUCCACCUUA  | Plate 1 | A10 | 678  | 203.68  | 451.07  | 0.85439263  | -0.4189131   | 5.33E-08    | 0 |
| DHCR7   | 1717   | CAUCGUGUUGGACGACAG  | Plate 1 | B10 | 488  | 222.42  | 246.90  | 2.36385744  | 1.049258824  | 2.84E-15    | 1 |
| DHCR7   | 1717   | CGCCAGCUCUUAUCCUUG  | Plate 1 | C10 | 418  | 120.94  | 313.85  | 0.754001227 | -0.599254531 | 0.000018    | 0 |
| DHCR7   | 1717   | CUUCAAGGAAUUCGAGU   | Plate 1 | D10 | 1563 | 133.36  | 204.16  | 1.40169584  | 0.295289119  | 5.91E-69    | 1 |
| DHX57   | 90957  | CGACUUGGUAUCUUGGAA  | Plate 5 | A21 | 991  | 186.74  | 479.75  | 0.683955416 | -0.721953342 | 1.87E-13    | 0 |
| DHX57   | 90957  | CAACUCUUUUGAACCAUA  | Plate 5 | B21 | 669  | 71.63   | 282.25  | 0.49166024  | -1.198193935 | 2.5E-09     | 0 |
| DHX57   | 90957  | CGAAUACCCACCAAGUA   | Plate 5 | C21 | 831  | 57.89   | 255.02  | 0.658844414 | -0.775917812 | 0.00000752  | 0 |
| DHX57   | 90957  | GAUAUGACUUGGCAAGAA  | Plate 5 | D21 | 379  | 213.59  | 170.92  | 2.737597675 | 1.278982908  | 5.54E-80    | 1 |
| DIP2A   | 23181  | UAACAACGUGGUGGUAUU  | Plate 3 | A17 | 643  | 52.69   | 573.24  | 0.177118383 | -2.669109362 | 2.83E-59    | 0 |
| DIP2A   | 23181  | GAAGUGCCAAUUAACAAG  | Plate 3 | B17 | 535  | 121.67  | 310.57  | 1.108126001 | -0.023773288 | 0.000708982 | 0 |
| DIP2A   | 23181  | GAAGAGCUGUUCUGUUCU  | Plate 3 | C17 | 374  | 125.02  | 207.75  | 0.733976083 | -0.618090264 | 1.32E-25    | 0 |
| DIP2A   | 23181  | CGCGUGGUGUUCGGAUA   | Plate 3 | D17 | 1638 | 59.26   | 250.10  | 0.489034797 | -1.203866193 | 0.027947369 | 0 |
| DNA2    | 1763   | GUUAAACCGGUAAGCAAG  | Plate 5 | E8  | 338  | 113.68  | 350.83  | 0.634976041 | -0.82915347  | 4.21E-11    | 0 |
| DNA2    | 1763   | CUACGUCACUUAAGAUAUG | Plate 5 | F8  | 733  | 58.45   | 316.48  | 0.331810304 | -1.765496937 | 0.000000117 | 0 |
| DNA2    | 1763   | ACAGUUGCCUGUUAUCUA  | Plate 5 | G8  | 87   | 180.71  | 184.97  | 4.31034715  | 1.933876535  | 2.02E-26    | 1 |
| DNA2    | 1763   | UGAUUAAGUAUCCCAUA   | Plate 5 | H8  | 660  | 41.78   | 227.24  | 0.538031314 | -1.068165486 | 9.94E-10    | 0 |
| DNAJB1  | 3337   | GAAAGAGCAUUCGAAACGA | Plate 5 | E18 | 614  | 186.48  | 488.20  | 0.800125199 | -0.495629864 | 0.43388232  | 0 |
| DNAJB1  | 3337   | GCUCUGAUGCUUAUUAUCC | Plate 5 | F18 | 1406 | 121.04  | 383.84  | 0.529183642 | -1.09208716  | 0.000416798 | 0 |
| DNAJB1  | 3337   | GCGAUAUCUUCGACCGCUA | Plate 5 | G18 | 57   | 145.87  | 45.09   | 2.657734106 | 1.236269245  | 2.81E-20    | 1 |
| DNAJB1  | 3337   | AAAUUAUAGUUCGAAUAU  | Plate 5 | H18 | 1593 | 121.25  | 188.24  | 1.175806372 | 0.059722969  | 3.25E-60    | 1 |
| DNAJB13 | 374407 | GACAAGACUUGGACCAUUG | Plate 4 | M7  | 241  | 489.85  | 274.83  | 6.95233185  | 2.589211856  | 1.83E-25    | 1 |
| DNAJB13 | 374407 | GACAACUUCUUCUUGGUA  | Plate 4 | N7  | 176  | 208.17  | 153.13  | 4.343984052 | 1.910733439  | 5.57E-40    | 1 |
| DNAJB13 | 374407 | CGGAAGGUGGUCGAAACGA | Plate 4 | O7  | 588  | 98.17   | 516.10  | 0.426239442 | -1.438549362 | 6.35E-19    | 0 |
| DNAJB13 | 374407 | CAGGUAUCUUCGCAAUUA  | Plate 4 | P7  | 652  | 196.09  | 154.39  | 2.920525492 | 1.33794261   | 8.46E-44    | 1 |
| DPY19L2 | 283417 | GAAGGACUUGGUAUUAUA  | Plate 3 | I5  | 1426 | 91.34   | 371.80  | 0.482792719 | -1.222419399 | 0.002057963 | 0 |
| DPY19L2 | 283417 | GAUAUACCCUUCUUAUAUA | Plate 3 | J5  | 1451 | 208.83  | 309.61  | 0.969155495 | -0.217095161 | 6.23E-46    | 0 |
| DPY19L2 | 283417 | CGGCAUCGUGUUCUUGGUG | Plate 3 | K5  | 690  | 71.14   | 396.64  | 0.411813631 | -1.451831734 | 0.855675546 | 0 |
| DPY19L2 | 283417 | GAUAUGGUGUAACAGAGUA | Plate 3 | L5  | 995  | 66.23   | 248.68  | 0.514136489 | -1.131671911 | 0.005196294 | 0 |
| DTX3    | 196403 | GCACCAUUGGUAUCGAGUA | Plate 2 | A14 | 94   | 407.41  | 284.82  | 2.672189487 | 1.149550106  | 5.64E-20    | 1 |
| DTX3    | 196403 | GCAGGUAUCGUGGUCUUA  | Plate 2 | B14 | 1077 | 119.71  | 546.06  | 0.442089674 | -1.446061267 | 1.32E-13    | 0 |
| DTX3    | 196403 | UCAAGGGGUGUUAAGAUA  | Plate 2 | C14 | 1294 | 168.07  | 263.09  | 1.239927974 | 0.04178411   | 3.39E-56    | 1 |
| DTX3    | 196403 | CCUCAUUAAGGCGGAGACU | Plate 2 | D14 | 794  | 67.85   | 176.08  | 0.654453309 | -0.880110034 | 0.00000359  | 0 |
| DYRK1A  | 1859   | UAAGGUAUGUUAUUAUA   | Plate 2 | I12 | 1283 | 117.41  | 481.16  | 0.399162406 | -1.593424454 | 0.000354231 | 0 |
| DYRK1A  | 1859   | GCUAUACCCUUGGACUUAU | Plate 2 | J12 | 1401 | 180.66  | 303.04  | 0.890297577 | -0.436112674 | 5.75E-26    | 0 |
| DYRK1A  | 1859   | AAACUCGAAUUAACCUUA  | Plate 2 | K12 | 1047 | 122.40  | 332.43  | 0.713621093 | -0.755242045 | 0.310194651 | 0 |
| DYRK1A  | 1859   | CUUUAACCUUAACCAAGAA | Plate 2 | L12 | 1484 | 87.27   | 247.70  | 0.658766347 | -0.870633447 | 0.004748    | 0 |
| ECM1    | 1893   | GAACGUGGUCUUAUGUUCU | Plate 3 | A5  | 761  | 260.00  | 380.44  | 0.94822442  | -0.248594769 | 3.42E-24    | 0 |
| ECM1    | 1893   | AGGAUACCCUUGAACCAUA | Plate 3 | B5  | 388  | 50.48   | 664.87  | 0.165695396 | -2.765289796 | 4.56E-42    | 0 |
| ECM1    | 1893   | CGGACAUUCGACCAUUG   | Plate 3 | C5  | 373  | 95.66   | 276.94  | 2.119203858 | 0.911627154  | 0.000788133 | 1 |
| ECM1    | 1893   | CAACAAGCAUUAACAAUAU | Plate 3 | D5  | 133  | 141.98  | 274.56  | 1.181019564 | 0.068137642  | 0.003099912 | 1 |
| ECSIT   | 51295  | GUGGUUCCUGGUAUUAUA  | Plate 2 | I16 | 1046 | 136.51  | 303.52  | 0.831807685 | -0.534150289 | 8.32E-38    | 0 |
| ECSIT   | 51295  | CAACAAGUGGUGUUAUUAU | Plate 2 | J16 | 1423 | 202.90  | 443.69  | 0.738690306 | -0.705430658 | 8.77E-08    | 0 |
| ECSIT   | 51295  | GGACUUGGUGUUAUUAUA  | Plate 2 | K16 | 66   | 148.58  | 160.46  | 2.523081212 | 1.066714435  | 2.12E-18    | 1 |
| ECSIT   | 51295  | GCGACGUGGUAUUAUUAU  | Plate 2 | L16 | 157  | 113.28  | 285.84  | 0.967413147 | -0.316268159 | 3.74E-10    | 0 |
| EED     | 8726   | GGAAUUAUGUUAUUAUUA  | Plate 4 | E19 | 1546 | 74.05   | 232.89  | 0.555533702 | -1.056339027 | 0.012084202 | 0 |
| EED     | 8726   | GUACAACACGACUUAUAUA | Plate 4 | F19 | 1142 | 40.71   | 222.72  | 0.315230505 | -1.873806312 | 0.828984757 | 0 |
| EED     | 8726   | CAACAGAGUUAUUAUUAU  | Plate 4 | G19 | 652  | 265.64  | 206.12  | 3.283586344 | 1.506987025  | 6.42E-45    | 1 |
| EED     | 8726   | GGUAUUAAGGUAUUAUUA  | Plate 4 | H19 | 811  | 131.01  | 200.07  | 1.371138821 | 0.247089277  | 8.9E-18     | 1 |
| EFCAB3  | 146779 | GUUUAAGGUGUUAUUAUA  | Plate 3 | A10 | 921  | 145.63  | 391.12  | 0.521529323 | -1.111074946 | 0.000120329 | 0 |
| EFCAB3  | 146779 | GCACAACACGUGGUAUUAU | Plate 3 | B10 | 1380 | 242.81  | 511.64  | 0.904274541 | -0.317062469 | 0.02564949  | 0 |
| EFCAB3  | 146779 | CGAUGACACUUCUUAUUAU | Plate 3 | C10 | 1160 | 92.70   | 249.04  | 0.614493607 | -0.874425316 | 0.383579779 | 0 |
| EFCAB3  | 146779 | ACGGAAAGGUGUUAUUAUA | Plate 3 | D10 | 1133 | 92.36   | 200.93  | 0.843770649 | -0.416972413 | 3.54E-63    | 0 |
| EFEMP2  | 30008  | GUUUAAGGUGUUAUUAUA  | Plate 1 | I22 | 1453 | 118.68  | 329.07  | 0.742202162 | -0.622000097 | 4.34E-09    | 0 |
| EFEMP2  | 30008  | GUUUAAGGUGUUAUUAUA  | Plate 1 | J22 | 1164 | 277.95  | 111.35  | 4.172438737 | 1.86900666   | 8.54E-232   | 1 |
| EFEMP2  | 30008  | GGAAUGGACAGUUAUUAUA | Plate 1 | K22 | 599  | 122.34  | 205.98  | 1.153193657 | 0.0137506    | 2.78E-50    | 1 |
| EFEMP2  | 30008  | CUUUAAGGUGUUAUUAUA  | Plate 1 | L22 | 1148 | 156.42  | 93.80   | 3.025004791 | 1.40505322   | 7.86E-261   | 1 |
| EMR3    | 84658  | GGAAAGGUGUUAUUAUAUA | Plate 1 | I8  | 251  | 159.14  | 326.32  | 0.101750135 | -0.175031165 | 1.33E-20    | 0 |
| EMR3    | 84658  | GAAAGGUGUUAUUAUUAUA | Plate 1 | J8  | 1137 | 104.80  | 211.48  | 0.91659176  | -0.317532986 | 1.28E-42    | 0 |
| EMR3    | 84658  | CAAGUUGGUGUUAUUAUA  | Plate 1 | K8  | 846  | 131.10  | 404.22  | 0.497761981 | -1.198356259 | 5.22E-08    | 0 |
| EMR3    | 84658  | UAAUUAAGCUCUUAUUAUA | Plate 1 | L8  | 1399 | 128.97  | 288.73  | 0.748451868 | -0.609902761 | 8.95E-15    | 0 |
| ENAH    | 55740  | GAGAGAGGCGGUAUUAUA  | Plate 4 | M4  | 182  | 97.29   | 244.82  | 1.187824215 | 0.040035981  | 1.01E-09    | 1 |
| ENAH    | 55740  | GUUUAUUAAGUUAUUAUA  | Plate 4 | N4  | 1331 | 70.09   | 248.87  | 0.537270544 | -1.104564717 | 0.368471208 | 0 |
| ENAH    | 55740  | GGUUAUUAAGCAACGUAUA | Plate 4 | O4  | 1641 | 130.12  | 250.30  | 1.097122774 | -0.074560388 | 1.09E-09    | 0 |
| ENAH    | 55740  | GCAUUAUUAAGCAGGUAUA | Plate 4 | P4  | 1184 | 69.63   | 295.23  | 0.455535142 | -1.342651107 | 0.339218864 | 0 |
| ENPP7   | 339221 | GCAAUUAUUAUGGAAACCA | Plate 5 | I13 | 188  | 87.11   | 193.17  | 1.323111284 | 0.230006877  | 1.06E-27    | 1 |
| ENPP7   | 339221 | GAUUAACCGUCCAGUUAUA | Plate 5 | J13 | 347  | 388.96  | 113.81  | 5.587548654 | 2.308287957  | 1.79E-93    | 1 |
| ENPP7   | 339221 | GAGCACCGGUAACAAGUCA | Plate 5 | K13 | 396  | 52.84   | 84.81   | 1.032661854 | -0.127559612 | 1.08E-51    | 0 |
| ENPP7   | 339221 | ACACGAGUUAUGGUGGUAU | Plate 5 | L13 | 1482 | 239.80  | 236.82  | 1.693668909 | 0.586224341  | 5.97E-55    | 1 |
| ERC2    | 26059  | AAAGAGGAAUUAUGGAAUA | Plate 5 | M18 | 87   | 263.93  | 427.20  | 1.311896931 | 0.217726     |             |   |

|          |        |                       |         |     |      |        |        |             |              |             |   |
|----------|--------|-----------------------|---------|-----|------|--------|--------|-------------|--------------|-------------|---|
| F8A1     | 8263   | GAGAUGUGGCCACAGUUUA   | Plate 4 | O3  | 1553 | 120.24 | 230.57 | 1.041946368 | -0.149004347 | 0.0000237   | 0 |
| F8A1     | 8263   | CCACCUCUUCACCUCGUU    | Plate 4 | P3  | 390  | 30.81  | 54.29  | 0.917666918 | -0.332242864 | 2.07E-61    | 0 |
| FABP4    | 2167   | YUAGGUACUGGAAACUUG    | Plate 5 | M15 | 342  | 59.72  | 304.57 | 0.374677624 | -1.590205805 | 0.046850989 | 0 |
| FABP4    | 2167   | GAAUUGGGAUGGAAAUCA    | Plate 5 | N15 | 287  | 80.80  | 369.75 | 1.103877962 | -0.031346847 | 0.324980068 | 0 |
| FABP4    | 2167   | GAUGGAUACCCAAUAAU     | Plate 5 | O15 | 1538 | 106.97 | 276.52 | 0.6184273   | -0.867251619 | 8.17E-09    | 0 |
| FABP4    | 2167   | GAAUGCAAGAGCACCAUA    | Plate 5 | P15 | 748  | 33.61  | 310.76 | 0.174036909 | -2.696462327 | 2.05E-13    | 0 |
| FAHD2B   | 151313 | GCUCUGGACUGGCUUAACA   | Plate 3 | I22 | 393  | 621.32 | 127.52 | 7.482335338 | 2.731593403  | 4.86E-132   | 1 |
| FAHD2B   | 151313 | GGUAGAAGAAUUAUCUCA    | Plate 3 | J22 | 1633 | 99.09  | 293.20 | 0.666639452 | -0.756916618 | 5.66E-08    | 0 |
| FAHD2B   | 151313 | CGUGGUAUUGGAAAGAAA    | Plate 3 | K22 | 874  | 83.98  | 127.68 | 1.139505262 | 0.016512364  | 1.21E-29    | 1 |
| FAHD2B   | 151313 | ACAUAGACUAGUGGACAGU   | Plate 3 | L22 | 69   | 250.62 | 157.71 | 3.374772009 | 1.582894819  | 1.92E-16    | 1 |
| FAM27L   | 284123 | CAAAGAACGUGGCUUAUG    | Plate 4 | I10 | 1042 | 221.24 | 295.62 | 1.369408332 | 0.245267328  | 0.00000104  | 1 |
| FAM27L   | 284123 | CAACAAGCCUUGUCUUGU    | Plate 4 | J10 | 857  | 201.38 | 122.52 | 2.944937644 | 1.349951719  | 6.12E-99    | 1 |
| FAM27L   | 284123 | ACACCAGAAUACAGCUUG    | Plate 4 | K10 | 1570 | 174.99 | 316.63 | 0.844575017 | -0.451987891 | 0.009642767 | 0 |
| FAM27L   | 284123 | GGAGCUCACUGUCUGCAG    | Plate 4 | L10 | 20   | 58.30  | 81.59  | 1.365800808 | 0.241461725  | 0.00000408  | 1 |
| FCGR2A   | 2212   | GGACAGCUCUUCACCAUUG   | Plate 2 | M21 | 234  | 110.48 | 261.98 | 0.822877759 | -0.549722174 | 2.82E-13    | 0 |
| FCGR2A   | 2212   | GCUCAGGUCUACAGGCCAA   | Plate 2 | N21 | 923  | 49.74  | 272.67 | 0.545547183 | -1.142696328 | 0.0000356   | 0 |
| FCGR2A   | 2212   | GGUCUUGGACUCUGCUUA    | Plate 2 | O21 | 597  | 285.81 | 186.45 | 7.075449821 | 2.554349661  | 3.58E-69    | 1 |
| FCGR2A   | 2212   | CCACUGCACAGGAAACUAU   | Plate 2 | P21 | 868  | 71.01  | 362.85 | 0.333017347 | -1.854802972 | 7.89E-12    | 0 |
| FDFT1    | 2222   | GGAAAGACUUAUUAUUAUG   | Plate 1 | M16 | 1342 | 165.26 | 221.26 | 1.506049758 | 0.398885229  | 1.71E-28    | 1 |
| FDFT1    | 2222   | GGCAAGUACUGCCACUUA    | Plate 1 | N16 | 579  | 111.76 | 265.37 | 0.827119157 | -0.46571712  | 9.61E-23    | 0 |
| FDFT1    | 2222   | CCACUUGGUCUGCUGUUA    | Plate 1 | O16 | 25   | 107.59 | 38.18  | 1.6384262   | 0.520426483  | 0.00000688  | 1 |
| FDFT1    | 2222   | GUUUGGAGCAGGUAUGUUA   | Plate 1 | P16 | 1389 | 175.15 | 212.72 | 1.459312282 | 0.353404436  | 2.68E-44    | 1 |
| FEM1B    | 10116  | CAAAGAACGUGGAAACUA    | Plate 2 | A15 | 494  | 79.22  | 335.55 | 0.693202334 | -0.797123791 | 2.92E-15    | 0 |
| FEM1B    | 10116  | ACAAGGAUCUUCUUGCAU    | Plate 2 | B15 | 1405 | 108.74 | 287.77 | 0.707945379 | -0.766762248 | 2.47E-08    | 0 |
| FEM1B    | 10116  | GCUAUAGUUAUGCGGCAUA   | Plate 2 | C15 | 1396 | 106.24 | 252.11 | 0.702056138 | -0.778813908 | 3.08E-10    | 0 |
| FEM1B    | 10116  | GAAUUGAGCAGUGUAUCA    | Plate 2 | D15 | 491  | 246.55 | 475.51 | 1.219689079 | 0.018041217  | 1.37E-11    | 1 |
| FGF11    | 2256   | GGAAACGUGGAAAGAAAG    | Plate 1 | M14 | 1358 | 80.26  | 249.70 | 0.568505067 | -1.006639093 | 7.1E-13     | 0 |
| FGF11    | 2256   | ACAGCUGAGUGGUCGUUUA   | Plate 1 | N14 | 1663 | 117.68 | 288.83 | 0.652146245 | -0.808616773 | 1.13E-15    | 0 |
| FGF11    | 2256   | AGCGAAUCCGACGGAAG     | Plate 1 | O14 | 1508 | 114.71 | 226.61 | 1.449805022 | 0.343974684  | 2.65E-61    | 1 |
| FGF11    | 2256   | AGAGCUUUAUGGAGCCGUA   | Plate 1 | P14 | 1138 | 63.78  | 325.68 | 0.42511504  | -1.425959002 | 0.009024522 | 0 |
| FNDC7    | 163479 | GGAAUCGAAUUAUUAUGU    | Plate 3 | E18 | 1208 | 45.93  | 379.04 | 0.247472338 | -2.186556045 | 2.34E-62    | 0 |
| FNDC7    | 163479 | GAUGGAUCUCCUUAUUAU    | Plate 3 | F18 | 1290 | 137.39 | 273.59 | 0.812338607 | -0.471742106 | 1.27E-18    | 0 |
| FNDC7    | 163479 | AACGUGAGCUCUUAUUG     | Plate 3 | G18 | 22   | 148.35 | 103.99 | 5.074001949 | 2.171228852  | 0.000000767 | 1 |
| FNDC7    | 163479 | GAAUUGGUAUUAUAGAG     | Plate 3 | H18 | 1005 | 109.40 | 211.84 | 1.230709193 | 0.127594683  | 8.51E-31    | 1 |
| FOXD4L1  | 200350 | CCGUAACGUGGCGGACACA   | Plate 2 | E15 | 1157 | 140.66 | 221.43 | 1.042779789 | -0.208037683 | 4.33E-60    | 0 |
| FOXD4L1  | 200350 | GGUAUCAGGCGGUGGCGA    | Plate 2 | F15 | 1334 | 144.63 | 128.89 | 2.049466243 | 0.766776018  | 2.11E-122   | 1 |
| FOXD4L1  | 200350 | GGCAAAUUAUGGACCAACA   | Plate 2 | G15 | 122  | 289.90 | 304.89 | 1.435069351 | 0.25264825   | 1.29E-15    | 1 |
| FOXD4L1  | 200350 | CCGAUGGGGAGACGCGUUA   | Plate 2 | H15 | 1430 | 98.57  | 263.77 | 0.623390064 | -0.950265143 | 1.32E-15    | 0 |
| FOXD4L6  | 653404 | CGGAUGGAGGAAAGGUAUA   | Plate 4 | A15 | 1293 | 80.94  | 231.39 | 0.560071552 | -1.044602311 | 0.0564033   | 0 |
| FOXD4L6  | 653404 | GCUGGAGACAAACACGAA    | Plate 4 | B15 | 880  | 50.98  | 221.14 | 0.415966259 | -1.473746953 | 0.120914724 | 0 |
| FOXD4L6  | 653404 | UCACUACACUACUAGUUAU   | Plate 4 | C15 | 1270 | 40.77  | 239.25 | 0.351244557 | -1.717737595 | 2.93E-23    | 0 |
| FOXD4L6  | 653404 | CAAAGACUUAUGGACCAUA   | Plate 4 | D15 | 1145 | 71.51  | 363.49 | 0.356688042 | -1.695550613 | 5.42E-31    | 0 |
| FRRS1L   | 23732  | GCAUACAGCACUUCUUAUA   | Plate 1 | M10 | 951  | 221.13 | 430.33 | 1.17246684  | 0.037662913  | 0.159529065 | 0 |
| FRRS1L   | 23732  | GAUAGGGCUGUAUGUAGAA   | Plate 1 | N10 | 1164 | 46.01  | 279.37 | 0.330294152 | -1.790060876 | 0.082184187 | 0 |
| FRRS1L   | 23732  | CAGAGCGUUGUUGUUAUA    | Plate 1 | O10 | 468  | 174.54 | 313.49 | 1.197218004 | 0.067801672  | 1.6E-60     | 1 |
| FRRS1L   | 23732  | AGUUAUCAGCUCUGGCUUA   | Plate 1 | P10 | 535  | 74.34  | 67.97  | 2.526733819 | 1.145389483  | 1.86E-36    | 1 |
| FUT6     | 2528   | GACACGCGUCGUCUUAUCA   | Plate 3 | E9  | 714  | 157.16 | 332.42 | 0.706862928 | -0.672392836 | 3E-12       | 0 |
| FUT6     | 2528   | GUACAGACACGCGGCAUA    | Plate 3 | F9  | 1408 | 94.44  | 221.24 | 0.666658381 | -0.756875653 | 1.08E-15    | 0 |
| FUT6     | 2528   | ACCGAGGUCUUAUGUACAA   | Plate 3 | G9  | 162  | 97.05  | 183.47 | 2.260956148 | 1.005037789  | 3.82E-32    | 1 |
| FUT6     | 2528   | UCAAGACGAUCCACUGUG    | Plate 3 | H9  | 748  | 56.76  | 246.96 | 0.56451392  | -0.99681416  | 0.158794621 | 0 |
| FXN      | 2395   | CAUACAGGUUUGAGGACUA   | Plate 3 | A4  | 834  | 225.22 | 175.98 | 4.441389846 | 1.979115988  | 9.37E-84    | 1 |
| FXN      | 2395   | UGUCAACUGGUGGAGAGU    | Plate 3 | B4  | 798  | 188.40 | 298.39 | 0.994387667 | -0.180014913 | 9.96E-31    | 0 |
| FXN      | 2395   | GUUAUAGCUGGACUGGGA    | Plate 3 | C4  | 912  | 235.74 | 265.00 | 1.345209319 | 0.255935457  | 7.47E-32    | 1 |
| FXN      | 2395   | GGACCUAAGCGUUAUAGUA   | Plate 3 | D4  | 1548 | 180.28 | 246.90 | 2.235282107 | 0.988561699  | 4.56E-12    | 1 |
| FZD4     | 8322   | CAAAGACAGCUCUUAUUA    | Plate 1 | M21 | 1083 | 131.46 | 422.26 | 0.787916556 | -0.535769453 | 0.001339206 | 0 |
| FZD4     | 8322   | GACAAGACAGACAAAGUUA   | Plate 1 | N21 | 1614 | 205.53 | 151.05 | 2.170604079 | 0.926212393  | 1.84E-230   | 1 |
| FZD4     | 8322   | GAUCGAUUCUUAUGUUAU    | Plate 1 | O21 | 1374 | 257.53 | 219.99 | 1.755982344 | 0.620394132  | 1.43E-152   | 1 |
| FZD4     | 8322   | AGUCAUAUGGAGGAGUCA    | Plate 1 | P21 | 513  | 64.16  | 88.82  | 1.529361377 | 0.421045138  | 1.09E-20    | 1 |
| FZR1     | 51343  | GACAGGACCGUUAUUAUCA   | Plate 1 | M11 | 1581 | 251.04 | 438.31 | 0.932622498 | -0.29251907  | 1.71E-17    | 0 |
| FZR1     | 51343  | CCACAGGAUUAACGGAUAU   | Plate 1 | N11 | 317  | 69.58  | 151.84 | 0.965308519 | -0.24282219  | 8.47E-28    | 0 |
| FZR1     | 51343  | GCAAAACCGUUAUGGACAAA  | Plate 1 | O11 | 1170 | 80.65  | 361.93 | 0.447917877 | -1.350578054 | 0.084367586 | 0 |
| FZR1     | 51343  | GCAACGAUGGUCUCCUUA    | Plate 1 | P11 | 313  | 81.96  | 76.36  | 1.984480627 | 0.796877272  | 2.06E-43    | 1 |
| G2E3     | 55632  | UCAAGAACUUGUCUUAUCA   | Plate 6 | I4  | 1435 | 99.38  | 419.65 | 0.619861625 | -0.905406735 | 2.76E-19    | 0 |
| G2E3     | 55632  | GAGUUAAGUUAUCCAAUUA   | Plate 6 | J4  | 1170 | 23.81  | 486.16 | 0.10459858  | -3.472489653 | 2.23E-104   | 0 |
| G2E3     | 55632  | CAUCGACCGUUAUGCAUUA   | Plate 6 | K4  | 1279 | 167.71 | 348.97 | 0.823722448 | -0.49519462  | 2.92E-19    | 0 |
| G2E3     | 55632  | GUACACCAUUAUCUGAUG    | Plate 6 | L4  | 933  | 196.37 | 402.68 | 1.344706025 | 0.211865979  | 0.035209364 | 0 |
| GABRR2   | 2570   | GAAGGAGCUCUCCGUAUGA   | Plate 4 | M10 | 472  | 126.47 | 117.99 | 3.005934349 | 1.379528133  | 6.26E-72    | 1 |
| GABRR2   | 2570   | GGACUAGGACUUAUUAUGA   | Plate 4 | N10 | 1483 | 63.20  | 282.61 | 0.395060063 | -1.548141452 | 7.24E-24    | 0 |
| GABRR2   | 2570   | GAGUUAUCCGUGCAUGUGU   | Plate 4 | O10 | 778  | 129.37 | 389.45 | 0.495483311 | -1.221376999 | 0.00000423  | 0 |
| GABRR2   | 2570   | GAUGGAAGCUACAGUAGUA   | Plate 4 | P10 | 1451 | 60.69  | 340.29 | 0.357088305 | -1.693932578 | 5.79E-36    | 0 |
| GAK      | 2580   | GAAACGACUUAUUAAGAUCA  | Plate 2 | M17 | 627  | 173.04 | 415.81 | 0.75604645  | -0.67192543  | 0.126182967 | 0 |
| GAK      | 2580   | GCCUCCGACUUAUUAUGUA   | Plate 2 | N17 | 727  | 327.56 | 186.12 | 2.640906256 | 1.132506882  | 2.29E-106   | 1 |
| GAK      | 2580   | GUUGAAGACUUAUGUUAUCA  | Plate 2 | O17 | 991  | 198.71 | 380.07 | 1.021106904 | -0.238338293 | 4.62E-31    | 0 |
| GAK      | 2580   | CUAUAUUGGUCUUAUUAUCA  | Plate 2 | P17 | 1006 | 201.37 | 359.83 | 1.087456646 | -0.147514322 | 4.08E-22    | 0 |
| GALK2    | 2585   | GCUAUAACUUAUUAUGUUA   | Plate 3 | M12 | 628  | 70.82  | 188.85 | 0.707855765 | -0.670367894 | 9.59E-23    | 0 |
| GALK2    | 2585   | GCACAACUUAUUAUUAUGU   | Plate 3 | N12 | 1574 | 118.53 | 329.98 | 0.640965947 | -0.813575606 | 0.000180875 | 0 |
| GALK2    | 2585   | GGAAUUAUCCACCAAGUUA   | Plate 3 | O12 | 5    | 22.40  | 124.51 | 0.236363106 | -2.252818455 | 0.394915715 | 0 |
| GALK2    | 2585   | GGACCAUGUCUUAUUAUUAU  | Plate 3 | P12 | 300  | 95.41  | 173.90 | 0.902606773 | -0.319725712 | 6.77E-29    | 0 |
| GALNT2   | 2590   | GGUUGGAGUUAUUAUGAUGU  | Plate 4 | A16 | 1055 | 71.67  | 368.91 | 0.376056805 | -1.619262859 | 5.82E-34    | 0 |
| GALNT2   | 2590   | GCACUGUCUUAUCCCGGAAA  | Plate 4 | B16 | 638  | 88.23  | 134.31 | 1.203595207 | 0.059064899  | 2.12E-60    | 1 |
| GALNT2   | 2590   | CUAUAAGCUCUUAUUAUGU   | Plate 4 | C16 | 1521 | 87.90  | 214.47 | 0.706401779 | -0.709724487 | 6.68E-16    | 0 |
| GALNT2   | 2590   | GGAAGUACGACUUAUUAUGA  | Plate 4 | D16 | 60   | 205.80 | 129.79 | 4.510340117 | 1.964950861  | 4.83E-13    | 1 |
| GJC2     | 57165  | GAGGAGCGGUCACUUAAGG   | Plate 2 | M12 | 971  | 43.71  | 177.89 | 0.376804969 | -1.676582314 | 9.75E-10    | 0 |
| GJC2     | 57165  | CCACGCGGUCGUCUUAUGA   | Plate 2 | N12 | 874  | 85.37  | 435.29 | 0.378884458 | -1.668642343 | 2.61E-25    | 0 |
| GJC2     | 57165  | UUUAUAGCUGGUCAGCUGU   | Plate 2 | O12 | 565  | 105.15 | 269.69 | 0.80216637  | -0.586498819 | 2.88E-13    | 0 |
| GJC2     | 57165  | CGGACGAGCAGGCAAGUUA   | Plate 2 | P12 | 13   | 15.03  | 10.59  | 0.955138389 | -0.334690525 | 0.001891165 | 0 |
| GLI3     | 2737   | GCUAUAGCUCUCCGCUUAU   | Plate 5 | I21 | 1156 | 161.06 | 172.43 | 1.91027455  | 0.75985247   | 5.13E-35    | 1 |
| GLI3     | 2737   | GCACGAAGGUUGCAACAAG   | Plate 5 | J21 | 457  | 152.93 | 228.83 | 2.279331972 | 1.014683529  | 5.41E-37    | 1 |
| GLI3     | 2737   | GCACUAAGCGUUAUUAACAGA | Plate 5 | K21 | 1151 | 45.18  | 392.72 | 0.25877108  | -2.124179236 | 1.36E-50    | 0 |
| GLI3     | 2737   | GAAUUAUCUGGUCAGUUAU   | Plate 5 | L21 | 382  | 308.23 | 288.54 | 2.538340393 | 1.169958016  | 2.28E-41    | 1 |
| GLIPR1L2 | 144321 | GGAGAGGUCUUAUUAUUAU   | Plate 3 | M19 | 1773 | 125.18 | 358.43 | 0.571524425 | -0.97900816  | 3.91E-18    | 0 |
| GLIPR1L2 | 144321 | AAUAAGCGAUUAUUAUUAU   | Plate 3 | N19 | 1229 | 51.82  | 332.26 | 0.324242401 | -1.79675     |             |   |

|          |        |                         |         |     |      |         |         |             |               |             |   |   |
|----------|--------|-------------------------|---------|-----|------|---------|---------|-------------|---------------|-------------|---|---|
| GPC3     | 2719   | GGAUCAGAUUUGCAAGUUAU    | Plate 3 | H10 | 428  | 210.52  | 279.64  | 1.149995468 | 0.029732953   | 9.08E-12    | 1 |   |
| GPC6     | 10082  | CAGCAAGCCAGAUUCUUG      | Plate 3 | E22 | 1116 | 288.08  | 264.14  | 1.595293321 | 0.50192649    | 4.55E-58    | 1 | 2 |
| GPC6     | 10082  | GGAUGAUGCAAGAUUUC       | Plate 3 | F22 | 1060 | 65.87   | 199.71  | 0.57002227  | -0.982805031  | 0.000831076 | 0 |   |
| GPC6     | 10082  | GAUUUGGUCUCUCCUGUG      | Plate 3 | G22 | 105  | 64.93   | 163.51  | 1.235095548 | 0.132727432   | 1.64E-19    | 1 |   |
| GPC6     | 10082  | CAGCAUUAAGCCUACCAUA     | Plate 3 | H22 | 178  | 231.26  | 583.70  | 1.045395002 | -0.107847055  | 0.035171019 | 0 |   |
| GPR3     | 2827   | UUUAUCCACUCUCCAAGAA     | Plate 3 | I11 | 17   | #DIV/0! | #DIV/0! | 3.298564995 | 1.54994331    | 0.000853765 | 1 | 2 |
| GPR3     | 2827   | CCACUCUCUCACACCUAUUC    | Plate 3 | J11 | 646  | 220.83  | 640.68  | 0.900499415 | -0.323097978  | 6.26E-11    | 0 |   |
| GPR3     | 2827   | ACCGCUACCUUUCUUCUGA     | Plate 3 | K11 | 1034 | 136.96  | 271.96  | 0.961605789 | -0.228377735  | 0.262944622 | 0 |   |
| GPR3     | 2827   | ACAAGGCCUCCUCCUACUA     | Plate 3 | L11 | 125  | 98.91   | 118.10  | 2.077271455 | 0.882794536   | 7.74E-24    | 1 |   |
| GPR63    | 81491  | CAACAUUUGUGUGUGAUGA     | Plate 2 | I18 | 1392 | 84.12   | 494.29  | 0.294362178 | -2.032807991  | 4E-45       | 0 | 1 |
| GPR63    | 81491  | UGGGUUAUCUGCUAUGUUU     | Plate 2 | J18 | 1065 | 256.22  | 183.07  | 2.163630547 | 0.844981963   | 2.24E-121   | 1 |   |
| GPR63    | 81491  | UCACACAAGCGCAGGGAUA     | Plate 2 | K18 | 1006 | 92.37   | 410.74  | 0.520617166 | -1.210177423  | 0.407350878 | 0 |   |
| GPR63    | 81491  | AGAGGCGAGUAUAGCUAAA     | Plate 2 | L18 | 1138 | 105.31  | 209.24  | 1.180102777 | -0.029559697  | 1.89E-63    | 0 |   |
| GPS2     | 2874   | UGACAGAGCCAAACAAUUG     | Plate 1 | E19 | 452  | 148.05  | 217.67  | 1.464234842 | 0.358262752   | 7.69E-33    | 1 | 1 |
| GPS2     | 2874   | GCGUCGACCCGGCCAUUA      | Plate 1 | F19 | 1333 | 101.40  | 250.35  | 0.678654957 | -0.751134039  | 3.87E-57    | 0 |   |
| GPS2     | 2874   | GCGAUUCUACCAAGGUGA      | Plate 1 | G19 | 1315 | 52.03   | 252.78  | 0.375869733 | -1.603579555  | 1.02E-11    | 0 |   |
| GPS2     | 2874   | UGGAUUAAGUAUAGGAAACA    | Plate 1 | H19 | 1039 | 56.93   | 298.95  | 0.346879266 | -1.719378694  | 0.002649138 | 0 |   |
| GPX1     | 2876   | GCAAGGUAUCUUAUCGA       | Plate 4 | A3  | 1503 | 77.54   | 301.64  | 0.448635861 | -1.364668518  | 9.54E-25    | 0 |   |
| GPX1     | 2876   | UGAAUUCUCCUACUACGUG     | Plate 4 | B3  | 781  | 95.26   | 310.19  | 0.715938271 | -0.690378261  | 0.011045599 | 0 | 1 |
| GPX1     | 2876   | GGAGAACGCGCAAGCAAG      | Plate 4 | C3  | 1026 | 157.83  | 304.13  | 0.817634284 | -0.498757772  | 0.00000135  | 0 |   |
| GPX1     | 2876   | GCAACAGUUGGGCAUCA       | Plate 4 | D3  | 258  | 115.56  | 309.84  | 1.017597315 | -0.183118598  | 5.28E-10    | 0 |   |
| GSK3B    | 2932   | GAAGAAAGUAGGUGCUAU      | Plate 3 | M6  | 1093 | 235.79  | 182.84  | 1.861960321 | 0.724927107   | 5.73E-129   | 1 | 2 |
| GSK3B    | 2932   | GACCCAAAGUCAAACUA       | Plate 3 | N6  | 1141 | 28.99   | 381.17  | 0.147295091 | -2.93511397   | 2.84E-95    | 0 |   |
| GSK3B    | 2932   | GAUGAGGUCUUAUUAUUC      | Plate 3 | O6  | 1337 | 65.03   | 384.54  | 0.285395146 | -1.980862519  | 0.020033784 | 0 |   |
| GSK3B    | 2932   | AGAGGUCAGUAUAGCAGACA    | Plate 3 | P6  | 975  | 81.54   | 146.04  | 1.384361834 | 0.297325851   | 3.04E-36    | 1 |   |
| HAGH     | 3029   | GGACCAUUGUGGGGGAUA      | Plate 4 | A10 | 1160 | 91.39   | 360.98  | 0.392691937 | -1.556815487  | 1.64E-09    | 0 | 1 |
| HAGH     | 3029   | GACCAUUAUUGUUAUCUUG     | Plate 4 | B10 | 1464 | 96.59   | 226.16  | 0.868980326 | -0.410889948  | 6.73E-15    | 0 |   |
| HAGH     | 3029   | GGACUGCGGAUGAUGUG       | Plate 4 | C10 | 204  | 21.48   | 227.01  | 0.497068624 | -1.216768422  | 0.000473332 | 0 |   |
| HAGH     | 3029   | UGGCUUUGUUAUAGCGGACA    | Plate 4 | D10 | 1022 | 141.09  | 139.87  | 1.675977134 | 0.536717098   | 5.33E-106   | 1 |   |
| HEPH     | 9843   | GCAAGAAUCUACUUAUCA      | Plate 3 | I7  | 941  | 102.10  | 310.15  | 0.770432157 | -0.548155396  | 0.14869215  | 0 | 2 |
| HEPH     | 9843   | CGUGUAUCUGGUUAUUA       | Plate 3 | J7  | 829  | 104.40  | 205.73  | 1.181195843 | 0.068352963   | 1.31E-45    | 1 |   |
| HEPH     | 9843   | GGAAUACACUAGGUUAUCA     | Plate 3 | K7  | 1224 | 101.44  | 324.39  | 0.603134603 | -0.901343309  | 5.78E-32    | 0 |   |
| HEPH     | 9843   | CUUAUGGAAAGUUGCGAUA     | Plate 3 | L7  | 1409 | 102.87  | 121.79  | 1.379921936 | 0.292691432   | 4.9E-128    | 1 |   |
| HIF1AN   | 55662  | GAAAUUUAAGUAGUUCGUU     | Plate 1 | I16 | 1636 | 126.81  | 271.91  | 0.873515417 | -0.386979136  | 7.25E-27    | 0 | 2 |
| HIF1AN   | 55662  | CAUAUUAAGUUAUUAUCA      | Plate 1 | J16 | 2088 | 208.50  | 361.20  | 0.843895131 | -0.436748572  | 2.47E-19    | 0 |   |
| HIF1AN   | 55662  | UCAUUGACUUAUAGGUUU      | Plate 1 | K16 | 127  | 362.85  | 363.00  | 2.860041873 | 1.324152062   | 4.46E-14    | 0 |   |
| HIF1AN   | 55662  | AGUUAUAGUUAUAGCGAUA     | Plate 1 | L16 | 207  | 243.41  | 173.30  | 2.715776875 | 1.249480747   | 3.55E-52    | 1 |   |
| HILPDA   | 29923  | GGUGGAGUUGGUAUUGCUUA    | Plate 2 | M9  | 1551 | 69.17   | 348.84  | 0.337747203 | -1.83445648   | 5.85E-13    | 0 | 0 |
| HILPDA   | 29923  | GAUAAAGCCUCCUUAUUA      | Plate 2 | N9  | 1174 | 212.14  | 379.05  | 1.018642282 | -0.241824701  | 4.7E-13     | 0 |   |
| HILPDA   | 29923  | GAUAGCAGUUAAGAGGUU      | Plate 2 | O9  | 255  | 77.50   | 651.58  | 0.435700949 | -1.467062047  | 0.311483247 | 0 |   |
| HILPDA   | 29923  | GUUGGAGUUGGUAUUAUUA     | Plate 2 | P9  | 801  | 44.80   | 216.46  | 0.562240884 | -1.0992211939 | 1.45E-09    | 0 |   |
| HLA-DRB5 | 3127   | GCACAGAGCAUUAUUAUCA     | Plate 2 | I10 | 1274 | 162.36  | 246.41  | 1.105794325 | -0.123389136  | 5.69E-14    | 0 | 2 |
| HLA-DRB5 | 3127   | GAGGUUUCUACUAGGCGAA     | Plate 2 | J10 | 859  | 117.30  | 86.46   | 2.397381529 | 0.992987315   | 6.39E-127   | 1 |   |
| HLA-DRB5 | 3127   | UCUUGCAGCAGGUAUAGUA     | Plate 2 | K10 | 453  | 142.36  | 525.08  | 0.603543046 | -0.996943634  | 0.044089643 | 0 |   |
| HLA-DRB5 | 3127   | GCUAUGACUUAUUAUUAUCA    | Plate 2 | L10 | 1349 | 270.18  | 124.95  | 5.654916439 | 2.231033497   | 1.75E-168   | 1 |   |
| HMBG3    | 3149   | CAGAUAAAGUGCGCUAUA      | Plate 3 | I10 | 59   | 181.19  | 162.25  | 2.512287385 | 1.157106284   | 2.16E-14    | 1 | 1 |
| HMBG3    | 3149   | GCAGAUAAAGUGCGCUAUA     | Plate 3 | J10 | 1433 | 142.53  | 252.18  | 1.037582384 | -0.1186933    | 8.23E-30    | 0 |   |
| HMBG3    | 3149   | AGAAACCAUCUGCGGUACA     | Plate 3 | K10 | 1182 | 130.60  | 232.37  | 1.068693353 | -0.076047272  | 0.00000225  | 0 |   |
| HMBG3    | 3149   | GUAUAGCAGGAGUAGCGAUA    | Plate 3 | L10 | 492  | 131.13  | 420.68  | 1.216834275 | 0.111237474   | 0.263202542 | 0 |   |
| HMGS2    | 3158   | AAACUGACCCUGGAGGAUA     | Plate 1 | I13 | 35   | 149.80  | 168.08  | 1.299774709 | 0.186377374   | 0.000000012 | 1 | 2 |
| HMGS2    | 3158   | AGAGGACUUAUUAUUAUCA     | Plate 1 | J13 | 1433 | 65.76   | 290.17  | 0.508031383 | -1.168894681  | 0.005190366 | 0 |   |
| HMGS2    | 3158   | GGGCAUAGUUAUUAUUAUCA    | Plate 1 | K13 | 355  | 55.57   | 172.77  | 0.563320369 | -1.019856662  | 8.3E-31     | 0 |   |
| HMGS2    | 3158   | CCUUCACCCUUGACGUAUUA    | Plate 1 | L13 | 1376 | 200.25  | 197.35  | 1.538216576 | 0.429374437   | 1.09E-152   | 1 |   |
| HNRNPC   | 3183   | CAACGGGCAUUAUUAUUAUCA   | Plate 2 | A4  | 663  | 110.27  | 80.59   | 2.815962065 | 1.22515569    | 8.14E-138   | 1 | 3 |
| HNRNPC   | 3183   | CAUUAUUAUUAUUAUUAUCA    | Plate 2 | B4  | 188  | 223.86  | 131.42  | 4.144871387 | 1.782855127   | 4.63E-65    | 1 |   |
| HNRNPC   | 3183   | AGAAGGAGUUAUUAUUAUCA    | Plate 2 | C4  | 2    | #DIV/0! | #DIV/0! | 0.174401618 | -2.787968676  | 0.720682358 | 0 |   |
| HNRNPC   | 3183   | GAAACGACCCUUGGUAUUAUCA  | Plate 2 | D4  | 110  | 198.40  | 123.66  | 3.581260849 | 1.571995396   | 6.58E-36    | 1 |   |
| HNRNPUL1 | 11100  | GCGCAAAGCUUAUUAUUAUCA   | Plate 3 | A16 | 1102 | 248.37  | 403.32  | 1.254438355 | 0.155146355   | 1.93E-12    | 1 | 1 |
| HNRNPUL1 | 11100  | GGAAAGUUAUUAUUAUUAUCA   | Plate 3 | B16 | 114  | 37.71   | 176.49  | 0.705210906 | -0.675768531  | 9.68E-10    | 0 |   |
| HNRNPUL1 | 11100  | GGAAAGUUAUUAUUAUUAUCA   | Plate 3 | C16 | 298  | 61.09   | 185.19  | 0.849839779 | -0.406632442  | 5.76E-18    | 0 |   |
| HNRNPUL1 | 11100  | GCAACUUAUUAUUAUUAUCA    | Plate 3 | D16 | 1068 | 51.13   | 207.09  | 0.537143604 | -1.068515477  | 0.000560139 | 0 |   |
| HOXB5    | 3215   | GCUUUAUUAUUAUUAUUAUCA   | Plate 4 | M16 | 25   | 213.56  | 207.81  | 4.14179222  | 1.841969813   | 0.000000187 | 1 | 1 |
| HOXB5    | 3215   | UGAGGAUUAUUAUUAUUAUCA   | Plate 4 | N16 | 807  | 26.27   | 190.74  | 0.342730228 | -1.753140024  | 0.056910115 | 0 |   |
| HOXB5    | 3215   | GCGUUAUUAUUAUUAUUAUCA   | Plate 4 | O16 | 1332 | 104.32  | 215.00  | 0.917560849 | -0.332409628  | 1.33E-10    | 0 |   |
| HOXB5    | 3215   | CAGUUAUUAUUAUUAUUAUCA   | Plate 4 | P16 | 1290 | 96.98   | 169.74  | 1.041148609 | -0.15010936   | 6.76E-70    | 0 |   |
| HPX      | 3263   | CAAUUGGACCCUGGAGUAUA    | Plate 3 | I20 | 995  | 64.45   | 217.90  | 0.53258412  | -1.080813905  | 0.090897046 | 0 | 2 |
| HPX      | 3263   | GACCAAGUUCUUAUUAUUAUCA  | Plate 3 | J20 | 720  | 107.10  | 245.74  | 0.643071206 | -0.808844824  | 3.08E-21    | 0 |   |
| HPX      | 3263   | CAUUAUUAUUAUUAUUAUCA    | Plate 3 | K20 | 1028 | 233.11  | 268.43  | 1.41471566  | 0.328616897   | 2.02E-76    | 1 |   |
| HPX      | 3263   | GAAUUGGACCCUUGGAGGCGA   | Plate 3 | L20 | 1314 | 121.98  | 150.79  | 1.438663173 | 0.352833639   | 1.67E-64    | 1 |   |
| HSPA6    | 3310   | GAGGAAAGCCUUAUUAUUAUCA  | Plate 1 | A21 | 982  | 79.48   | 212.89  | 1.036481944 | -0.140189223  | 4.24E-11    | 0 | 3 |
| HSPA6    | 3310   | GCACAGGUAUUAUUAUUAUCA   | Plate 1 | B21 | 844  | 347.10  | 220.48  | 3.309518722 | 1.534737225   | 4.16E-161   | 1 |   |
| HSPA6    | 3310   | CCUUAUUAUUAUUAUUAUCA    | Plate 1 | C21 | 1160 | 204.71  | 213.23  | 1.397218065 | 0.290672994   | 2.12E-142   | 1 |   |
| HSPA6    | 3310   | GAGGAGGAGGUAUUAUUAUCA   | Plate 1 | D21 | 758  | 295.52  | 233.32  | 3.012865651 | 1.399252135   | 5.6E-73     | 1 |   |
| HTR2A    | 3356   | GAUUAUUAUUAUUAUUAUCA    | Plate 2 | M20 | 1549 | 129.86  | 332.91  | 0.62807693  | -0.939459026  | 0.000000118 | 0 | 2 |
| HTR2A    | 3356   | UCAAUGACCCUUAUUAUUAUCA  | Plate 2 | N20 | 926  | 120.27  | 353.68  | 0.709564901 | -0.763465657  | 0.00000164  | 0 |   |
| HTR2A    | 3356   | GUGUAUUAUUAUUAUUAUCA    | Plate 2 | O20 | 1085 | 105.87  | 155.47  | 1.266351944 | 0.072206205   | 3.37E-55    | 1 |   |
| HTR2A    | 3356   | GAUCGUAUUAUUAUUAUUAUCA  | Plate 2 | P20 | 1324 | 273.29  | 136.51  | 5.256733336 | 2.125694343   | 6.95E-236   | 1 |   |
| HTR3E    | 285242 | GAAGGUGGUAUUAUUAUUAUCA  | Plate 3 | I18 | 1291 | 75.49   | 218.37  | 0.516012203 | -1.126418132  | 0.0000629   | 0 | 1 |
| HTR3E    | 285242 | CAAAAGGCGUUAUUAUUAUCA   | Plate 3 | J18 | 618  | 113.44  | 283.31  | 0.610574635 | -0.883655659  | 2.56E-12    | 0 |   |
| HTR3E    | 285242 | GGACUUGGAGAAAGAGUG      | Plate 3 | K18 | 238  | 54.64   | 219.98  | 1.505804278 | 0.417949052   | 3.59E-23    | 0 |   |
| HTR3E    | 285242 | GAGGCGAUCUUAUUAUUAUCA   | Plate 3 | L18 | 1259 | 57.97   | 281.92  | 0.33452377  | -1.751699064  | 1E-13       | 1 |   |
| IGSF11   | 152404 | CAACAUUAUUAUUAUUAUCA    | Plate 2 | E14 | 1078 | 147.38  | 428.06  | 0.56347156  | -1.096057509  | 0.083314365 | 0 | 3 |
| IGSF11   | 152404 | GGAACAAUUAUUAUUAUUAUCA  | Plate 2 | F14 | 397  | 359.20  | 183.47  | 4.216924937 | 1.807719132   | 6.22E-79    | 1 |   |
| IGSF11   | 152404 | GAACAUUAUUAUUAUUAUCA    | Plate 2 | G14 | 59   | 407.54  | 185.68  | 5.651303188 | 2.230111382   | 1.95E-15    | 1 |   |
| IGSF11   | 152404 | CAGGAACUUAUUAUUAUUAUCA  | Plate 2 | H14 | 1030 | 252.86  | 304.33  | 1.383628924 | 0.199984869   | 1.32E-54    | 1 |   |
| IL17RA   | 23765  | GAAACCAUUAUUAUUAUUAUCA  | Plate 1 | E4  | 946  | 106.31  | 375.40  | 0.597515485 | -0.934836201  | 0.00000117  | 0 | 2 |
| IL17RA   | 23765  | GACCUUUAUUAUUAUUAUUAUCA | Plate 1 | F4  | 598  | 198.07  | 93.44   | 4.510974032 | 1.981554774   | 3.07E-114   | 1 |   |
| IL17RA   | 23765  | CAGAACCAUUAUUAUUAUUAUCA | Plate 1 | G4  | 936  | 335.09  | 454.61  | 1.381075829 | 0.273908327   | 4.59E-36    | 1 |   |
| IL17RA   | 23765  | AAUUAUUAUUAUUAUUAUUAUCA | Plate 1 | H4  | 1007 | 67.56   | 429.57  | 0.307495603 | -1            |             |   |   |

|            |        |                      |         |     |      |        |        |             |              |             |   |   |
|------------|--------|----------------------|---------|-----|------|--------|--------|-------------|--------------|-------------|---|---|
| IRX6       | 79190  | CGACGAGUCUCCUGCAUA   | Plate 2 | M13 | 136  | 289.66 | 288.14 | 2.163933162 | 0.84518373   | 2.37E-16    | 1 | 3 |
| IRX6       | 79190  | GAAAGAACCGACCCGGGA   | Plate 2 | N13 | 1345 | 204.80 | 234.45 | 1.706870346 | 0.502881266  | 1.64E-79    | 1 | 0 |
| IRX6       | 79190  | GGAGAAACCGCGCAUCUG   | Plate 2 | O13 | 484  | 108.59 | 493.96 | 0.040195465 | -1.388153537 | 0.985697712 | 0 | 1 |
| IRX6       | 79190  | GAGCCUUAUUUCCCUAUGA  | Plate 2 | P13 | 144  | 400.39 | 159.77 | 4.408790996 | 1.871910877  | 8.49E-33    | 1 | 1 |
| ISCU       | 23479  | CGCCUUGGUGUUAUCAA    | Plate 1 | E5  | 378  | 304.12 | 25.28  | 12.4846613  | 3.450755697  | 2.3E-17     | 1 | 4 |
| ISCU       | 23479  | GGUCUGAAUUUUUUAUGA   | Plate 1 | F5  | 1564 | 135.32 | 193.00 | 1.556445199 | 0.446370575  | 1.39E-82    | 1 | 1 |
| ISCU       | 23479  | UGGAGGAAGCCUUGACUUA  | Plate 1 | G5  | 455  | 212.69 | 25.34  | 9.543049767 | 3.062566189  | 1.22E-210   | 1 | 1 |
| ISCU       | 23479  | CAGCAUUGGGUGAGCUUAU  | Plate 1 | H5  | 166  | 254.99 | 44.41  | 7.298549576 | 2.675725582  | 7.14E-66    | 1 | 1 |
| JPH2       | 57158  | GAGGGACGUGGAAACAAUG  | Plate 4 | I6  | 452  | 60.38  | 213.08 | 0.605195924 | -0.932811191 | 7.28E-10    | 0 | 0 |
| JPH2       | 57158  | AAGCAGCGGUGCCAAAGU   | Plate 4 | J6  | 88   | 175.77 | 346.29 | 0.808170219 | -0.515554274 | 0.002891001 | 0 | 0 |
| JPH2       | 57158  | GGCAUUGGUGGCGCAUAGA  | Plate 4 | K6  | 671  | 62.23  | 111.35 | 0.872524272 | -0.405018198 | 1.97E-59    | 0 | 0 |
| JPH2       | 57158  | UCAAGGGACGCUACGGAAU  | Plate 4 | L6  | 902  | 56.92  | 362.99 | 0.482410897 | -1.259950965 | 0.032372806 | 0 | 0 |
| KCNA4      | 3739   | UCACAUGCCUUAUGGUUAU  | Plate 1 | I9  | 922  | 105.81 | 480.79 | 0.414950701 | -1.460872357 | 0.000000737 | 0 | 3 |
| KCNA4      | 3739   | CAAGGCGUGGAGACUGA    | Plate 1 | J9  | 659  | 154.19 | 329.45 | 1.344750318 | 0.235454123  | 2.46E-08    | 1 | 1 |
| KCNA4      | 3739   | CGACAGGGAUCUGUCAUG   | Plate 1 | K9  | 1123 | 134.35 | 105.39 | 2.157724059 | 0.91762617   | 2.62E-97    | 1 | 1 |
| KCNA4      | 3739   | GCGGGUGUCUUAACCAUUG  | Plate 1 | L9  | 960  | 190.56 | 301.58 | 1.548631794 | 0.439109959  | 2.05E-25    | 1 | 1 |
| KCND1      | 3750   | ACGAAGGCGUGGCUUUUAU  | Plate 2 | A12 | 1305 | 194.75 | 392.97 | 0.902391072 | -0.416647509 | 0.00094205  | 0 | 1 |
| KCND1      | 3750   | GGACGGCGUUGAGACUUA   | Plate 2 | B12 | 1307 | 82.59  | 282.79 | 0.536998605 | -1.165481962 | 0.0000821   | 0 | 1 |
| KCND1      | 3750   | GGAAGGGACAAACAAAGA   | Plate 2 | C12 | 45   | 276.91 | 338.40 | 1.275862756 | 0.083000938  | 0.000245078 | 1 | 0 |
| KCND1      | 3750   | CGCAUAGUUCACAGAUAGA  | Plate 2 | D12 | 1073 | 31.68  | 430.35 | 0.162973069 | -2.885766722 | 2.2E-71     | 0 | 0 |
| KCNH2      | 3757   | GCGGGAAGGUGGACUUGCUA | Plate 2 | I3  | 519  | 128.48 | 305.56 | 0.846639112 | -0.508653165 | 2.58E-12    | 0 | 0 |
| KCNH2      | 3757   | CCACCUACGUCUUAUGGCA  | Plate 2 | J3  | 229  | 53.71  | 632.38 | 0.402331226 | -1.582016589 | 0.00930593  | 0 | 0 |
| KCNH2      | 3757   | GUCUACGCGGCAUUGGCUA  | Plate 2 | K3  | 166  | 67.99  | 304.13 | 0.968572183 | -0.314540733 | 0.0000223   | 0 | 0 |
| KCNH2      | 3757   | CCGACGUGGUGGUGAGUA   | Plate 2 | L3  | 491  | 131.56 | 347.09 | 0.871427718 | -0.467019301 | 0.0000181   | 0 | 0 |
| KERA       | 11081  | GACAUGCCACCCAGCUAA   | Plate 2 | A11 | 7    | 2.50   | 5.94   | 0.392360951 | -1.618218838 | 0.091694897 | 0 | 1 |
| KERA       | 11081  | AAGAUGCCUUGAGGAAUA   | Plate 2 | B11 | 961  | 42.08  | 301.47 | 0.241503359 | -2.318357049 | 5.06E-29    | 0 | 0 |
| KERA       | 11081  | UCAUAUUCUAGAUUAUA    | Plate 2 | C11 | 425  | 300.77 | 205.48 | 2.752873221 | 1.192465962  | 8.24E-69    | 1 | 1 |
| KERA       | 11081  | UCAACAAGGUUCCCGAAU   | Plate 2 | D11 | 809  | 50.79  | 178.15 | 0.507049503 | -1.248273701 | 2.1E-30     | 0 | 0 |
| KIAA0195   | 9772   | GGUUGAAGGUGGACUUAU   | Plate 5 | M7  | 738  | 30.01  | 298.47 | 0.198155087 | -2.50922562  | 0.000442134 | 0 | 1 |
| KIAA0195   | 9772   | GCUGAAGGCGGGGAGCUA   | Plate 5 | N7  | 897  | 42.69  | 352.83 | 0.260202169 | -2.11622264  | 7.44E-15    | 0 | 0 |
| KIAA0195   | 9772   | GGACUACCGAUGGCGCUA   | Plate 5 | O7  | 18   | 33.98  | 50.98  | 0.920348408 | -0.293675514 | 0.00011559  | 0 | 0 |
| KIAA0195   | 9772   | CCACCUAUGGCAUCCGUAA  | Plate 5 | P7  | 476  | 222.92 | 107.83 | 4.07241626  | 1.851957501  | 3.98E-120   | 1 | 1 |
| KIAA0317   | 9870   | UUAUUUUGGCGGCCAAUA   | Plate 2 | E20 | 1504 | 82.33  | 371.27 | 0.405969605 | -1.569028588 | 3.63E-10    | 0 | 2 |
| KIAA0317   | 9870   | GCACACCCUUAUAUUAUA   | Plate 2 | F20 | 967  | 135.72 | 190.92 | 1.549199304 | 0.363050549  | 7.65E-58    | 1 | 0 |
| KIAA0317   | 9870   | GCUAUUUAUUAUGGCUUA   | Plate 2 | G20 | 1440 | 94.11  | 216.44 | 0.858651615 | -0.488327405 | 3.37E-20    | 0 | 1 |
| KIAA0317   | 9870   | GCGCAAGGCGGGCGUUAU   | Plate 2 | H20 | 1109 | 248.12 | 190.87 | 1.947190395 | 0.692921748  | 1.57E-121   | 1 | 1 |
| KIF3A      | 11127  | AAACAAGGCGGCAUUGAUA  | Plate 3 | A13 | 262  | 445.33 | 127.39 | 7.472932816 | 2.72977933   | 8.09E-75    | 1 | 1 |
| KIF3A      | 11127  | UAUCGUAUCUUAUAUAUA   | Plate 3 | B13 | 1543 | 78.53  | 324.23 | 0.427915375 | -1.396497799 | 1.22E-16    | 0 | 0 |
| KIF3A      | 11127  | ACACAAGGCUUAAGGCUUA  | Plate 3 | C13 | 789  | 79.15  | 500.44 | 0.479400939 | -1.232590583 | 1.19E-28    | 0 | 0 |
| KIF3A      | 11127  | GCGUAUUGGGAAGGUUAU   | Plate 3 | D13 | 1322 | 108.03 | 275.01 | 0.641840458 | -0.811608585 | 0.383077801 | 0 | 0 |
| KLHL17     | 339451 | GACAUGGUGGCAAGCGUAC  | Plate 4 | M14 | 1535 | 184.59 | 315.84 | 0.989119033 | -0.224069314 | 9.91E-25    | 0 | 1 |
| KLHL17     | 339451 | GAUCUGGUCUUCAGCGACA  | Plate 4 | N14 | 807  | 124.53 | 191.22 | 1.11532822  | -0.050817038 | 1.72E-31    | 1 | 1 |
| KLHL17     | 339451 | GCAAUUUCUACUGAGUCA   | Plate 4 | O14 | 805  | 245.93 | 63.66  | 7.673834503 | 2.731662284  | 1.57E-118   | 1 | 1 |
| KLHL17     | 339451 | UCAUCGUGGAGAGAGUAU   | Plate 4 | P14 | 1067 | 126.91 | 271.88 | 0.793416503 | -0.542135057 | 0.001143395 | 1 | 0 |
| KLHL2      | 11275  | CACAAGGCGGCUUAUUAU   | Plate 1 | E9  | 1171 | 153.09 | 264.27 | 1.205951954 | 0.078288224  | 9.01E-32    | 1 | 3 |
| KLHL2      | 11275  | GGAACAGGUGGCGAGCUUA  | Plate 1 | F9  | 1189 | 266.13 | 195.30 | 3.234315961 | 1.024921991  | 4.92E-163   | 1 | 1 |
| KLHL2      | 11275  | CAUCACAAGGCGUUCGUAU  | Plate 1 | G9  | 827  | 285.80 | 133.34 | 3.889160227 | 1.767574466  | 2.08E-174   | 1 | 1 |
| KLHL2      | 11275  | AGCAGGUGUUGGUGUUAU   | Plate 1 | H9  | 45   | 139.86 | 213.86 | 1.129740362 | -0.015892598 | 0.00000132  | 0 | 0 |
| KLHL30     | 377007 | GAGAGAUCUUGAGGCGUGU  | Plate 1 | E7  | 1555 | 93.44  | 423.88 | 0.508182382 | -1.168465942 | 5.22E-26    | 0 | 2 |
| KLHL30     | 377007 | GGUUGGCAUUCAGGACUUA  | Plate 1 | F7  | 284  | 559.95 | 110.26 | 12.67925363 | 3.472513711  | 1.38E-95    | 1 | 1 |
| KLHL30     | 377007 | UGGGAACAUCGUGGACUUA  | Plate 1 | G7  | 939  | 366.27 | 246.11 | 3.069216705 | 1.425986305  | 8.24E-118   | 1 | 1 |
| KLHL30     | 377007 | GGUUGGCGGUGUACGUGA   | Plate 1 | H7  | 1437 | 129.02 | 227.06 | 1.111677569 | -0.039145798 | 9.03E-52    | 0 | 0 |
| KLRA1      | 10748  | GACAAGGCGUUAUUAUAUA  | Plate 3 | A12 | 821  | 42.45  | 353.48 | 0.239606376 | -2.23315702  | 6.63E-43    | 0 | 1 |
| KLRA1      | 10748  | UGACAAGAUAUAUCUGUA   | Plate 3 | B12 | 1315 | 70.15  | 244.92 | 0.703930608 | -0.678390099 | 0.299884857 | 0 | 0 |
| KLRA1      | 10748  | GAUCUGGAGGCGGCUUAU   | Plate 3 | C12 | 896  | 329.58 | 103.39 | 5.562706843 | 2.303891855  | 7.3E-134    | 1 | 1 |
| KLRA1      | 10748  | UGUCAACAUUUAUUAUAUA  | Plate 3 | D12 | 796  | 50.04  | 87.17  | 1.033162875 | -0.124827513 | 1.58E-33    | 0 | 0 |
| KRT24      | 192666 | GACAAGGCGGCUUAUUAUA  | Plate 1 | E16 | 1202 | 91.26  | 346.55 | 0.449341865 | -1.210999427 | 0.003590523 | 0 | 0 |
| KRT24      | 192666 | GAUCAUUGGCGGCUUAUUA  | Plate 1 | F16 | 1068 | 82.24  | 336.09 | 0.462541788 | -1.30422859  | 0.472666422 | 0 | 0 |
| KRT24      | 192666 | GGUAUCUGGUGGCUUAUAU  | Plate 1 | G16 | 1367 | 117.88 | 463.81 | 0.489973877 | -1.221107468 | 6.54E-09    | 0 | 0 |
| KRT24      | 192666 | UCAAGCAAGCUAGAGUGA   | Plate 1 | H16 | 1194 | 154.37 | 309.09 | 0.864482282 | -0.401975906 | 1.79E-26    | 1 | 0 |
| KRT31      | 3881   | GCAAUUCGUGGCGGCUUAU  | Plate 4 | A11 | 1364 | 138.21 | 235.88 | 1.297807943 | 0.167791533  | 1.41E-12    | 1 | 2 |
| KRT31      | 3881   | UGAAUCGUGGCGGCUUAUA  | Plate 4 | B11 | 1075 | 194.01 | 430.40 | 1.178029124 | 0.028089839  | 0.299149408 | 0 | 0 |
| KRT31      | 3881   | GACCAAGGCGGCUUAUAUA  | Plate 4 | C11 | 251  | 24.05  | 297.60 | 0.345848661 | -1.740072593 | 0.451252953 | 0 | 0 |
| KRT31      | 3881   | CGGAUUAUUAUAUAUAUA   | Plate 4 | D11 | 957  | 184.94 | 146.77 | 2.175629495 | 0.913147522  | 6.62E-127   | 1 | 1 |
| KRTAP10-10 | 353333 | GAAGGCGGCUUAUUAUAUA  | Plate 1 | M17 | 124  | 271.47 | 183.92 | 2.625373612 | 1.200638538  | 2.93E-27    | 1 | 1 |
| KRTAP10-10 | 353333 | UACACGAGCUCGCGACAA   | Plate 1 | N17 | 703  | 78.37  | 270.95 | 0.933275172 | -0.291509787 | 9.35E-23    | 0 | 0 |
| KRTAP10-10 | 353333 | CGUGGCGGCGGCUUAUAU   | Plate 1 | O17 | 358  | 149.30 | 288.92 | 0.828187438 | -0.463854982 | 2.22E-13    | 0 | 0 |
| KRTAP10-10 | 353333 | CUAAUUAAGCGGCGGCUUA  | Plate 1 | P17 | 609  | 123.80 | 214.63 | 1.034962778 | -0.142305325 | 4.38E-19    | 0 | 0 |
| LAMA1      | 284217 | GAAAGGCGGCUUAUUAUAU  | Plate 3 | M5  | 1195 | 152.19 | 250.29 | 1.218726704 | 0.113479421  | 1.68E-14    | 1 | 2 |
| LAMA1      | 284217 | CUAAUUAUUAUAUAUAUAU  | Plate 3 | N5  | 1175 | 100.64 | 149.89 | 1.359932063 | 0.27163936   | 6.62E-78    | 1 | 1 |
| LAMA1      | 284217 | CAACAUCACUUCGAGCUUAU | Plate 3 | O5  | 1146 | 100.12 | 382.18 | 0.771555679 | -0.546053045 | 1.29E-25    | 0 | 0 |
| LAMA1      | 284217 | GGUCAUUGCUUAUUAUAUA  | Plate 3 | P5  | 1472 | 112.52 | 273.41 | 0.828463763 | -0.443384721 | 0.094778102 | 0 | 0 |
| LCOR       | 84458  | GACGAUCUUCGAGGUGUUA  | Plate 4 | I9  | 1511 | 131.50 | 363.12 | 0.540239009 | -1.096615645 | 9.68E-10    | 0 | 0 |
| LCOR       | 84458  | UAUCAUUGGUGGCGGCUUA  | Plate 4 | J9  | 1441 | 88.08  | 185.72 | 0.78249844  | -0.562125586 | 5.46E-19    | 0 | 0 |
| LCOR       | 84458  | GUCAGAACCUGGAGGACAA  | Plate 4 | K9  | 1277 | 55.31  | 261.62 | 0.355765651 | -1.699286237 | 0.053663401 | 0 | 0 |
| LCOR       | 84458  | GACCAAGGCGGCGGCAAA   | Plate 4 | L9  | 215  | 133.73 | 260.14 | 1.102021464 | -0.068133045 | 1.86E-17    | 0 | 0 |
| LCT        | 3938   | GGAUGGCGGCUUAUUAUAU  | Plate 1 | A8  | 244  | 417.18 | 237.97 | 4.372013325 | 1.936413591  | 2.06E-56    | 1 | 1 |
| LCT        | 3938   | GCUACACCCUUAUAUAUAU  | Plate 1 | B8  | 574  | 121.44 | 690.28 | 0.447707414 | -1.351256094 | 3.95E-26    | 0 | 0 |
| LCT        | 3938   | UCUAUCUUCGAGGACUUAU  | Plate 1 | C8  | 1531 | 175.89 | 415.57 | 1.034284473 | -0.143251164 | 1.61E-14    | 0 | 0 |
| LCT        | 3938   | AGUCAUUGGCGGCUUAUAU  | Plate 1 | D8  | 1652 | 170.10 | 631.12 | 0.414233832 | -1.463366913 | 4.83E-27    | 0 | 0 |
| LEO1       | 123169 | GCAAGGCGGCUUAUUAUAU  | Plate 1 | I15 | 1456 | 111.34 | 323.22 | 0.639537492 | -0.836783365 | 0.081661624 | 0 | 0 |
| LEO1       | 123169 | GGAACAGGUAUAUAUAUAU  | Plate 1 | J15 | 982  | 139.67 | 309.30 | 0.885925068 | -0.366627621 | 0.0000161   | 0 | 0 |
| LEO1       | 123169 | GCGGUAUUAUAUAUAUAU   | Plate 1 | K15 | 807  | 295.29 | 411.00 | 0.971116695 | -0.234167633 | 1.59E-34    | 0 | 0 |
| LEO1       | 123169 | UCAGGCAACCAUAUAUAU   | Plate 1 | L15 | 1223 | 165.04 | 365.33 | 0.644056572 | -0.826624885 | 0.00000536  | 0 | 0 |
| LGALS4     | 3960   | ACAUGGCGGCUUAUUAUAU  | Plate 1 | M20 | 570  | 138.38 | 186.70 | 1.125967214 | -0.020719387 | 2.17E-83    | 0 | 0 |
| LGALS4     | 3960   | GCGAGCACAUAAGCGGCUU  | Plate 1 | N20 | 563  | 173.67 | 312.53 | 0.986670053 | -0.21124458  | 1.07E-48    | 0 | 0 |
| LGALS4     | 3960   | GCAAGGCGGCUUAUUAUAU  | Plate 1 | O20 | 462  | 73.49  | 181.68 | 1.096325218 | -0.059208379 | 2.81E-52    | 0 | 0 |
| LGALS4     | 3960   | ACCGGCGGCGGCUUAUAUA  | Plate 1 | P20 | 1016 | 191.45 | 343.16 | 0.77529041  | -0.559075483 | 2.8E        |   |   |

|         |        |                          |         |     |      |        |        |             |              |             |     |
|---------|--------|--------------------------|---------|-----|------|--------|--------|-------------|--------------|-------------|-----|
| LRRC20  | 55222  | CAAGGAAGGUCAACGAGAC      | Plate 4 | J4  | 391  | 132.51 | 178.39 | 1.120162266 | -0.044577632 | 5.21E-21    | 0   |
| LRRC20  | 55222  | GCAUCAACCCCGGUUCA        | Plate 4 | K4  | 575  | 88.75  | 107.95 | 2.009979454 | 0.798895387  | 2.35E-41    | 1   |
| LRRC20  | 55222  | GCUCAUGUCUCCGGAGGCG      | Plate 4 | L4  | 1115 | 18.54  | 318.90 | 0.093194883 | -3.631890817 | 2.64E-135   | 0   |
| LRRC8D  | 55144  | UUGGAGUUCGUAUUGGUUA      | Plate 3 | A6  | 1236 | 77.44  | 493.85 | 0.292160335 | -1.947062993 | 2.05E-39    | 0   |
| LRRC8D  | 55144  | GAUGAUGACUUGGAAUCU       | Plate 3 | B6  | 655  | 52.69  | 401.47 | 0.332676581 | -1.759703004 | 2.82E-18    | 0   |
| LRRC8D  | 55144  | GGUGGAGUUGUUUAUGGA       | Plate 3 | C6  | 1654 | 121.75 | 200.79 | 1.130732549 | 0.005362508  | 4.73E-57    | 1   |
| LRRC8D  | 55144  | GAGAUUGCGGACCUUA         | Plate 3 | D6  | 266  | 45.51  | 171.08 | 1.219845588 | 0.114803316  | 1.79E-21    | 1   |
| LRTM1   | 57408  | CAACAUCUCCUUUCAAUA       | Plate 5 | E9  | 1552 | 183.12 | 146.42 | 2.328840639 | 1.045684388  | 1.93E-143   | 1   |
| LRTM1   | 57408  | CUUCAGCAUCUUCAGGUUU      | Plate 5 | F9  | 485  | 79.90  | 450.54 | 0.271289633 | -2.056021711 | 0.001455904 | 0   |
| LRTM1   | 57408  | UAUCUAUCUUCGCGUUA        | Plate 5 | G9  | 1251 | 105.95 | 183.44 | 0.823148082 | -0.454703637 | 2.84E-54    | 0   |
| LRTM1   | 57408  | GGGACUAACAGCAGGCAUC      | Plate 5 | H9  | 945  | 89.74  | 220.93 | 0.616370672 | -0.87205741  | 0.00000126  | 0   |
| LUZP4   | 51213  | AAGGUUAUCUUCUAGUA        | Plate 3 | E20 | 795  | 39.58  | 157.38 | 0.598904106 | -0.913450817 | 0.0000601   | 0   |
| LUZP4   | 51213  | CAACAGCAUCUACAGGUA       | Plate 3 | F20 | 409  | 124.06 | 270.81 | 0.681630963 | -0.724832445 | 2.86E-22    | 0   |
| LUZP4   | 51213  | GAUCUCAAGGGCAGCUAA       | Plate 3 | G20 | 541  | 63.03  | 64.87  | 1.46947477  | 0.383405367  | 1.41E-111   | 1   |
| LUZP4   | 51213  | CCGAACCAUCUUAAGAGA       | Plate 3 | H20 | 1302 | 204.30 | 283.56 | 1.044037223 | -0.109722072 | 0.079137492 | 0   |
| LZTS2   | 84445  | GAUAGAGGUCAACUAGUC       | Plate 1 | A12 | 1195 | 136.70 | 352.10 | 0.680390222 | -0.747449894 | 0.00000619  | 0   |
| LZTS2   | 84445  | CAACAGGUUUCAGGCGU        | Plate 1 | B12 | 279  | 90.66  | 332.34 | 0.426731333 | -1.420484257 | 0.00000237  | 0   |
| LZTS2   | 84445  | GAACUACUCUGCCAGCCU       | Plate 1 | C12 | 50   | 171.76 | 249.60 | 1.043113489 | -0.130988079 | 0.00000028  | 0   |
| LZTS2   | 84445  | CCAAUCAGGACGACCUUC       | Plate 1 | D12 | 1622 | 248.93 | 193.89 | 2.482226527 | 1.119750574  | 2.48E-112   | 1   |
| MAB21L2 | 10586  | GCAAUUCUCCGGCGGUUC       | Plate 1 | I7  | 1384 | 171.23 | 304.44 | 0.936197064 | -0.287000061 | 0.964793079 | 0   |
| MAB21L2 | 10586  | GAGUUCAGUUGCGCAUCA       | Plate 1 | J7  | 673  | 312.90 | 128.76 | 3.299539133 | 1.530380321  | 2.21E-176   | 1   |
| MAB21L2 | 10586  | GCUCUUCGUGACCGGCAA       | Plate 1 | K7  | 272  | 53.48  | 186.43 | 0.604430816 | -0.918235087 | 1.93E-15    | 0   |
| MAB21L2 | 10586  | GCUCUACGAGUGCGGAAA       | Plate 1 | L7  | 1344 | 108.72 | 371.97 | 0.45478541  | -1.328626329 | 1.89E-13    | 0   |
| MAFG    | 4097   | GCAUGAAGCUGGAGCUCGA      | Plate 2 | A18 | 248  | 103.27 | 97.02  | 1.523919959 | 0.339314921  | 2.48E-44    | 1   |
| MAFG    | 4097   | UCACAAUGAUAAGUCCAA       | Plate 2 | B18 | 519  | 256.94 | 232.69 | 2.155573556 | 0.839599585  | 3.56E-70    | 3   |
| MAFG    | 4097   | UCAGAGAAGCAGCAGCAUGA     | Plate 2 | C18 | 133  | 302.70 | 208.24 | 3.564229687 | 1.565118102  | 1.5E-29     | 1   |
| MAFG    | 4097   | CAUCAAGGCACUAGGCGAA      | Plate 2 | D18 | 1335 | 123.44 | 342.36 | 0.598596729 | -1.008815908 | 0.023544216 | 0   |
| MANF    | 7873   | UUAAGAGCUGAAGAGAU        | Plate 1 | A13 | 872  | 171.74 | 344.61 | 1.156572666 | 0.01791705   | 9.64E-16    | 1   |
| MANF    | 7873   | GCAAGAGAUUCGUGUGUG       | Plate 1 | B13 | 474  | 148.95 | 395.41 | 0.844231271 | -0.436174032 | 4.07E-26    | 0   |
| MANF    | 7873   | UGAAGAGCUCGAGUUUA        | Plate 1 | C13 | 1559 | 213.24 | 334.96 | 1.352594407 | 0.243845086  | 9.28E-16    | 1   |
| MANF    | 7873   | GACUACUCCGGAAGAUAA       | Plate 1 | D13 | 968  | 42.77  | 367.20 | 0.259855365 | -2.136103459 | 9E-16       | 0   |
| MAP2K6  | 5608   | CAAAGAACCGGCUUCAUA       | Plate 4 | M13 | 503  | 473.33 | 145.85 | 8.849468584 | 2.937305456  | 1.75E-107   | 1   |
| MAP2K6  | 5608   | GAUAAAGGCCAGACAAUUC      | Plate 4 | N13 | 627  | 191.14 | 105.37 | 4.025494652 | 1.800880705  | 9.68E-110   | 1   |
| MAP2K6  | 5608   | GCUCUAGGUAUACUACUA       | Plate 4 | O13 | 623  | 32.02  | 175.10 | 0.390499366 | -1.564893257 | 0.727257807 | 0   |
| MAP2K6  | 5608   | CAUCAAGUCUCUGGUCUAA      | Plate 4 | P13 | 1465 | 58.81  | 232.27 | 0.564542975 | -1.033130054 | 0.00000135  | 0   |
| MDK     | 4192   | CACUCCGGCGGUCGCAAA       | Plate 4 | I12 | 920  | 30.97  | 85.39  | 0.643803517 | -0.843593004 | 6.58E-61    | 0   |
| MDK     | 4192   | GAGCGGACUGCAAGUAUA       | Plate 4 | J12 | 401  | 148.97 | 187.05 | 1.490084748 | 0.367109018  | 2.18E-18    | 1   |
| MDK     | 4192   | CAGUCGAAAGUAAGUUUG       | Plate 4 | K12 | 1641 | 122.27 | 187.53 | 1.180936192 | 0.031645648  | 3.71E-25    | 1   |
| MDK     | 4192   | UGGAGCGGACUGCAAGUAC      | Plate 4 | L12 | 250  | 90.74  | 213.54 | 0.788590093 | -0.550937877 | 4.71E-09    | 0   |
| MEGF6   | 1953   | GGACUUCGUGGCGCAUUA       | Plate 3 | E5  | 72   | 99.19  | 300.89 | 0.617465986 | -0.867463652 | 0.000117047 | 0   |
| MEGF6   | 1953   | GGCCUAGGACUGCGCUUGA      | Plate 3 | F5  | 530  | 143.36 | 64.87  | 4.234054726 | 1.910144695  | 2.56E-113   | 1   |
| MEGF6   | 1953   | CAAGCAGUCGCGCAAGAAA      | Plate 3 | G5  | 11   | 265.07 | 396.48 | 4.551539848 | 2.01445949   | 0.007165064 | 1   |
| MEGF6   | 1953   | CGCGAGUGUACCGGUAUG       | Plate 3 | H5  | 122  | 78.08  | 361.48 | 0.539260493 | -1.062840972 | 0.383429541 | 0   |
| MEX3B   | 84206  | GCGCACAACGGAACAUAU       | Plate 5 | M17 | 1164 | 138.00 | 305.56 | 1.141258989 | 0.016698692  | 8.59E-26    | 1   |
| MEX3B   | 84206  | GACUUGGUAUCGCGCUCGA      | Plate 5 | N17 | 1537 | 149.45 | 220.29 | 1.015122274 | -0.152274017 | 4.03E-60    | 2   |
| MEX3B   | 84206  | ACAUAAGCGCAUUGGUAU       | Plate 5 | O17 | 926  | 60.59  | 204.66 | 0.938430842 | -0.265605197 | 0.000752704 | 0   |
| MEX3B   | 84206  | GCGCAAGGUUUAUAUAUA       | Plate 5 | P17 | 1018 | 72.10  | 314.06 | 0.593181343 | -0.927382405 | 3.87E-09    | 0   |
| MGST3   | 4259   | GACGAGUUUUUUAUGCUUA      | Plate 3 | M13 | 1471 | 120.76 | 172.72 | 1.420374637 | 0.334376282  | 5.55E-40    | 1   |
| MGST3   | 4259   | AAAGUGGUAUUCUUAUAUA      | Plate 3 | N13 | 38   | 302.41 | 139.52 | 2.442671854 | 1.116564845  | 7.75E-13    | 1   |
| MGST3   | 4259   | AGUGUAUCCUCCUUUUUA       | Plate 3 | O13 | 784  | 56.06  | 170.97 | 0.641261668 | -0.812910145 | 0.057865281 | 0   |
| MGST3   | 4259   | GACCCAGCAGCAGGUAUG       | Plate 3 | P13 | 202  | 39.02  | 98.86  | 0.809538437 | -0.476723735 | 3.76E-18    | 0   |
| MITF    | 4286   | GAACGAAAGAAAGAUUAUA      | Plate 3 | A3  | 1221 | 93.39  | 435.53 | 0.319884025 | -1.81627437  | 3.61E-42    | 0   |
| MITF    | 4286   | GACGAGUUGUAUUAUAUA       | Plate 3 | B3  | 1297 | 224.40 | 356.89 | 1.234970193 | 0.132581     | 0.025867461 | 0   |
| MITF    | 4286   | GACCUAACUUAUAUAUAUA      | Plate 3 | C3  | 265  | 123.65 | 433.56 | 0.987598059 | -0.189899316 | 0.0000171   | 0   |
| MITF    | 4286   | GAGCAGGACACUUAUAUAUA     | Plate 3 | D3  | 1177 | 119.52 | 502.21 | 0.524584802 | -1.102647304 | 0.000174754 | 0   |
| MLANA   | 2315   | GAAUCUUCUGGAGCAAGC       | Plate 1 | M15 | 819  | 92.46  | 367.29 | 0.551653989 | -1.050048645 | 0.911882467 | 0   |
| MLANA   | 2315   | AAAGUUCGACUUCUUAUAUA     | Plate 1 | N15 | 312  | 308.45 | 175.25 | 3.972632934 | 1.798211289  | 3.02E-50    | 2   |
| MLANA   | 2315   | ACAAGAAAGCAGCAGCAAG      | Plate 1 | O15 | 802  | 76.49  | 236.85 | 0.729267224 | -0.647364746 | 2.7E-22     | 0   |
| MLANA   | 2315   | GCUCUACGGGCUUUAUAUA      | Plate 1 | P15 | 1332 | 319.77 | 292.42 | 1.881962488 | 0.720353665  | 7.98E-69    | 1   |
| MOB1A   | 55233  | GAAGCAAGCUGGCAAGUCA      | Plate 3 | M11 | 51   | 124.67 | 163.15 | 1.823287414 | 0.694646777  | 9.72E-15    | 1   |
| MOB1A   | 55233  | GACGAGUUCUUAUAUAUAUA     | Plate 3 | N11 | 1681 | 147.80 | 169.62 | 1.804811533 | 0.679952997  | 1.7E-44     | 1   |
| MOB1A   | 55233  | CAAGCAUUAUUAUAUAUAUA     | Plate 3 | O11 | 695  | 50.85  | 273.15 | 0.476486398 | -1.241388287 | 0.287335184 | 0   |
| MOB1A   | 55233  | AUUCUGAAGCAGCAGCUGUA     | Plate 3 | P11 | 509  | 238.01 | 413.12 | 1.144041079 | 0.022243633  | 1.88E-20    | 1   |
| MS4A6E  | 245802 | CAACCGGCGGCUUAUAUAUA     | Plate 4 | I14 | 1510 | 99.41  | 360.75 | 0.45947692  | -1.330221067 | 0.167290555 | 0   |
| MS4A6E  | 245802 | CGUGUUUUAUAUAUAUAUA      | Plate 4 | J14 | 672  | 119.57 | 251.25 | 0.711761395 | -0.698819778 | 4.85E-25    | 0   |
| MS4A6E  | 245802 | GGUAUUAUAUAUAUAUAUA      | Plate 4 | K14 | 213  | 160.30 | 163.93 | 1.682208966 | 0.542071579  | 3.44E-45    | 1   |
| MS4A6E  | 245802 | GCAAAAGUUAUAUAUAUAUA     | Plate 4 | L14 | 1379 | 85.53  | 166.54 | 0.829124813 | -0.478624168 | 4.22E-31    | 0   |
| MSH2    | 4436   | GAAGAGACCUUAUAUAUAUA     | Plate 5 | A13 | 1256 | 127.02 | 344.97 | 0.682247389 | -0.725560658 | 0.015846642 | 0   |
| MSH2    | 4436   | GACCAACCUUAUAUAUAUAUA    | Plate 5 | B13 | 1361 | 60.25  | 412.57 | 0.304368823 | -1.890035037 | 4.9E-37     | 0   |
| MSH2    | 4436   | CAGCUUUGCUCAGGUGUCA      | Plate 5 | C13 | 1000 | 375.98 | 200.23 | 2.964183498 | 1.393707229  | 1.7E-162    | 1   |
| MSH2    | 4436   | GAGGUAUUAUAUAUAUAUAUA    | Plate 5 | D13 | 1210 | 59.65  | 355.53 | 0.280233412 | -2.009226652 | 1.52E-89    | 0   |
| MUC7    | 4589   | CACCAAGCGGCUUAUAUAUA     | Plate 3 | M3  | 349  | 304.90 | 230.29 | 2.22951492  | 0.980581245  | 2.15E-77    | 1   |
| MUC7    | 4589   | CAACAAGCGGCUUAUAUAUAUA   | Plate 3 | N3  | 1077 | 70.69  | 299.25 | 0.575330717 | -0.969431819 | 0.002112884 | 0   |
| MUC7    | 4589   | CCACUUAUAUAUAUAUAUAUA    | Plate 3 | O3  | 42   | 283.63 | 283.11 | 1.544840366 | 0.455562546  | 0.0000011   | 1   |
| MUC7    | 4589   | GAAAGUUCUUAUAUAUAUAUAUA  | Plate 3 | P3  | 1522 | 98.64  | 314.51 | 0.643341106 | -0.808239444 | 0.028530751 | 0   |
| MZB1    | 51237  | GGACUUGUUCGCAUCUUAUA     | Plate 5 | A20 | 88   | 259.24 | 456.53 | 1.509868375 | 4.20321341   | 0.00000347  | 1   |
| MZB1    | 51237  | GAGGUGUUCAGCAGCAAGA      | Plate 5 | B20 | 707  | 354.65 | 449.76 | 1.383357573 | 0.294246584  | 4.29E-21    | 1   |
| MZB1    | 51237  | GGAGAAGCAGCAUCUUAUAUA    | Plate 5 | C20 | 1344 | 85.31  | 366.96 | 0.42019638  | -1.424791892 | 9.16E-23    | 0   |
| MZB1    | 51237  | ACUUCUACCCUUCUUAUAUAUA   | Plate 5 | D20 | 1001 | 23.27  | 399.99 | 0.207563092 | -2.442305695 | 3.98E-120   | 0   |
| NACA2   | 342538 | UCACAAACUGGACGCUUAUA     | Plate 5 | A17 | 1350 | 169.45 | 196.98 | 1.796088832 | 0.670931174  | 1.2E-29     | 1   |
| NACA2   | 342538 | GAGCUGUUCGCAUCUUAUAUA    | Plate 5 | B17 | 1026 | 159.82 | 291.97 | 0.96742233  | -0.221381889 | 2.27E-27    | 0   |
| NACA2   | 342538 | CAGGUAUUAUAUAUAUAUAUA    | Plate 5 | C17 | 1115 | 331.79 | 346.11 | 1.925894052 | 0.771600808  | 3.21E-13    | 0   |
| NACA2   | 342538 | GGUAUUAUAUAUAUAUAUAUA    | Plate 5 | D17 | 471  | 40.16  | 92.93  | 0.993722796 | -0.183012166 | 9.38E-57    | 0   |
| NCBP1   | 4686   | CUGAAGCUGCAUUAUAUAUAUA   | Plate 5 | M10 | 520  | 129.79 | 105.58 | 2.433338371 | 1.109009418  | 1.52E-117   | 1   |
| NCBP1   | 4686   | CAACUUCGCAUUAUAUAUAUAUA  | Plate 5 | N10 | 250  | 73.75  | 102.59 | 1.122806204 | -0.006818591 | 1.42E-46    | 0   |
| NCBP1   | 4686   | GAUGAUUUGCUGUUAUAUAUAUA  | Plate 5 | O10 | 513  | 168.09 | 116.88 | 2.354422174 | 1.061445503  | 3.97E-92    | 1   |
| NCBP1   | 4686   | GUACACAACCGCUCUUAUAUAUA  | Plate 5 | P10 | 321  | 107.54 | 145.19 | 1.109849778 | -0.023563116 | 1.8E-48     | 0   |
| NDUFA6  | 4700   | CGAAGAUUUAUAUAUAUAUAUA   | Plate 4 | M18 | 1698 | 102.89 | 198.39 | 0.91726023  | -0.332882372 | 6.74E-19    | 0   |
| NDUFA6  | 4700   | GGAAGCAGCGGACACAUUAUAUA  | Plate 4 | N18 | 370  | 154.67 | 150.62 | 2.11450738  | 0.872036228  | 1.51E-33    | 1   |
| NDUFA6  | 4700   | GAUCGAAUGGAAAGAAACAUAUA  | Plate 4 | O18 | 265  | 243.50 | 196.86 | 2.694945903 | 1.221970946  | 1.19E-27    | 1   |
| NDUFA6  | 4700   | GAAAUUGGACGCGGUAUAUAUAUA | Plate 4 | P18 | 619  | 77.61  | 81.83  | 2.517032482 | 1.123438467  | 9.32E-131   | 1   |
| NEDD8   | 4738   | GAAAGGAGAUUAUAUAUAUAUAUA | Plate 3 | E13 | 471  | 305.60 | 552.46 | 1.214984626 | 0.109042837  | 2.26E-19    | 1</ |



|        |           |                       |         |     |      |        |        |             |              |             |   |
|--------|-----------|-----------------------|---------|-----|------|--------|--------|-------------|--------------|-------------|---|
| NOD1   | 10392     | GAAUUAUCCUACAGAGU     | Plate 5 | G13 | 1072 | 93.57  | 355.94 | 0.445356264 | -1.340895741 | 0.017725049 | 0 |
| NOD1   | 10392     | GCAAAGGCCUCACGCAUCU   | Plate 5 | H13 | 1218 | 43.37  | 331.81 | 0.26366767  | -2.097134943 | 1.1E-11     | 0 |
| NOS2   | 4843      | GAAAGAGAUUCUUAUGAA    | Plate 3 | I9  | 888  | 75.49  | 214.46 | 0.821073705 | -0.456311583 | 0.004167962 | 0 |
| NOS2   | 4843      | GAAAGAGUUCUUAUGAAUC   | Plate 3 | J9  | 1000 | 127.84 | 238.82 | 1.152215412 | 0.032515239  | 2.88E-58    | 1 |
| NOS2   | 4843      | UAUCGAAUUGUUAACCAA    | Plate 3 | K9  | 1361 | 116.78 | 116.77 | 2.154788223 | 0.935650863  | 4.92E-191   | 1 |
| NOS2   | 4843      | UCUGCAGACAGUGCGUUA    | Plate 3 | L9  | 1035 | 90.43  | 146.23 | 1.083522359 | -0.056166297 | 2.03E-30    | 1 |
| NTNG2  | 84628     | GGGAGAACUCUUAAGUUA    | Plate 1 | M9  | 469  | 229.82 | 250.23 | 1.271976022 | 0.155187267  | 1.52E-32    | 1 |
| NTNG2  | 84628     | GAGAGUUCUGUCUCCCAUG   | Plate 1 | N9  | 1130 | 97.27  | 408.66 | 0.400473411 | -1.512105844 | 0.026906759 | 0 |
| NTNG2  | 84628     | GACGUCGCAUUGAGUGU     | Plate 1 | O9  | 1422 | 58.61  | 333.29 | 0.389670442 | -1.551557799 | 0.02490485  | 0 |
| NTNG2  | 84628     | GCAUGGAGCCUUCGGUUA    | Plate 1 | P9  | 531  | 37.18  | 93.34  | 0.641565489 | -0.832215764 | 1.9E-10     | 0 |
| NUDT10 | 170685    | GACAGAACUCUUAAGUUA    | Plate 1 | E14 | 1526 | 242.68 | 415.62 | 1.13160927  | -0.013508307 | 2.27E-30    | 0 |
| NUDT10 | 170685    | GACGAGGUCUGUUAUGUA    | Plate 1 | F14 | 1253 | 159.28 | 379.09 | 0.744592464 | -0.617361287 | 0.00000405  | 0 |
| NUDT10 | 170685    | GCAGAAUUAUCUGGAGAA    | Plate 1 | G14 | 209  | 125.54 | 276.26 | 0.988349995 | -0.208790282 | 1.38E-25    | 0 |
| NUDT10 | 170685    | GUGCAAACCCAACAGACA    | Plate 1 | H14 | 91   | 255.74 | 190.25 | 3.053181633 | 1.41842921   | 1.32E-20    | 1 |
| NUP107 | 57122     | GGAAUUCUGUCUUAUGUUA   | Plate 5 | E6  | 591  | 82.95  | 348.67 | 0.481956305 | -1.226953271 | 0.040019646 | 0 |
| NUP107 | 57122     | GAAAGUGUUAUCGAGUUA    | Plate 5 | F6  | 109  | 112.25 | 259.55 | 0.833979708 | -0.435843345 | 0.00000109  | 0 |
| NUP107 | 57122     | CAUCAGAGCUUAUUGGAA    | Plate 5 | G6  | 385  | 108.38 | 218.61 | 1.37693758  | 0.287535628  | 4.34E-19    | 1 |
| NUP107 | 57122     | UAUCAGUCUGUUAUUGUUA   | Plate 5 | H6  | 1512 | 115.73 | 242.95 | 0.909426055 | -0.310899289 | 2.91E-18    | 0 |
| NYX    | 60506     | GAGCUGAACUCUACCCAGU   | Plate 5 | A14 | 322  | 39.03  | 117.83 | 0.781019709 | -0.530496671 | 8.84E-20    | 0 |
| NYX    | 60506     | GGAUUGUUGUCUCGCUUCU   | Plate 5 | B14 | 70   | 320.32 | 163.41 | 2.402904364 | 1.090851698  | 1.03E-16    | 1 |
| NYX    | 60506     | GCAUCGUCUUCGUGGAGGA   | Plate 5 | C14 | 771  | 79.56  | 287.07 | 0.483345567 | -1.222800617 | 0.840753801 | 0 |
| NYX    | 60506     | UCCAGAACCUCUGGGUUCU   | Plate 5 | D14 | 1096 | 31.52  | 438.43 | 0.170633431 | -2.724955297 | 7.32E-43    | 0 |
| OAT    | 4942      | UAAGUUAUCUGGAAUUAU    | Plate 2 | E3  | 964  | 106.39 | 123.26 | 1.756022628 | 0.543839227  | 7.24E-146   | 1 |
| OAT    | 4942      | GGUAGGACUUGUCUGUUA    | Plate 2 | F3  | 1372 | 143.36 | 194.08 | 1.777917891 | 0.56171649   | 5.58E-55    | 1 |
| OAT    | 4942      | CGUGAAACUAGCUGUUA     | Plate 2 | G3  | 653  | 286.32 | 228.78 | 2.58471554  | 1.101533305  | 4E-21       | 1 |
| OAT    | 4942      | GACCUUAUUAUCGCGGAAU   | Plate 2 | H3  | 825  | 62.23  | 475.40 | 0.294793037 | -2.030711218 | 4.67E-20    | 0 |
| OBP2A  | 29991     | UGGCAAGUCUGGAGUUA     | Plate 1 | I6  | 1399 | 194.60 | 285.70 | 1.038214714 | -0.13779368  | 1.05E-74    | 0 |
| OBP2A  | 29991     | UGGAAAGUCUGGAGUUA     | Plate 1 | J6  | 546  | 133.31 | 180.24 | 1.754299177 | 0.619010598  | 5.03E-76    | 1 |
| OBP2A  | 29991     | UUAAGAAUUGGUGGAGCA    | Plate 1 | K6  | 1448 | 108.04 | 325.95 | 1.030529985 | -0.14849723  | 4.13E-10    | 0 |
| OBP2A  | 29991     | UUAAGAAUUGGUGGAGCA    | Plate 1 | L6  | 640  | 255.40 | 198.46 | 2.390625913 | 1.065504186  | 1.56E-120   | 1 |
| OGFR   | 11054     | GAGAAAGUCUGCUGUUAU    | Plate 3 | E14 | 1277 | 18.75  | 305.66 | 0.104984621 | -3.423645309 | 2.59E-77    | 0 |
| OGFR   | 11054     | GACUGGACGCAACCAUUA    | Plate 3 | F14 | 322  | 119.61 | 174.99 | 1.868993635 | 0.730366434  | 1.23E-09    | 1 |
| OGFR   | 11054     | UAAGUUAUCGCGCAACUA    | Plate 3 | G14 | 454  | 222.16 | 234.64 | 3.324268992 | 1.561141905  | 6.52E-09    | 1 |
| OGFR   | 11054     | UACGAGGUCUGGAGUUA     | Plate 3 | H14 | 35   | 524.17 | 97.41  | 8.441137182 | 2.905542149  | 8.78E-13    | 1 |
| OPN1LW | 5956      | GGUGCAGUCUUAUGUUA     | Plate 5 | M12 | 786  | 232.74 | 247.46 | 2.084242173 | 0.88595386   | 2.86E-70    | 1 |
| OPN1LW | 5956      | GACGAGGUCUCUUAUCUUA   | Plate 5 | N12 | 1534 | 57.34  | 412.68 | 0.303545585 | -1.893942347 | 9.35E-56    | 0 |
| OPN1LW | 5956      | UGGCAAGCAGCAAGAAAG    | Plate 5 | O12 | 879  | 36.36  | 323.38 | 0.217203859 | -2.376805894 | 3.46E-22    | 0 |
| OPN1LW | 5956      | UGAACUGGAAUCUGGUGAA   | Plate 5 | P12 | 994  | 232.90 | 377.50 | 0.913086634 | -0.305103876 | 0.00000145  | 0 |
| OR2F2  | 135948    | UCACUUAUCUGGAGUUA     | Plate 4 | A12 | 1288 | 195.15 | 220.29 | 1.532794989 | 0.407879382  | 1.4E-27     | 1 |
| OR2F2  | 135948    | GGCAUUAUCUUAUGAGAA    | Plate 4 | B12 | 1273 | 62.36  | 236.73 | 0.521576376 | -1.147334936 | 0.061497876 | 0 |
| OR2F2  | 135948    | CCUGUUAUUAUGUCUUA     | Plate 4 | C12 | 1255 | 83.68  | 239.57 | 0.754072969 | -0.615509328 | 0.020433964 | 0 |
| OR2F2  | 135948    | GCUGAUCUCUGUUAUUAU    | Plate 4 | D12 | 1530 | 132.69 | 157.46 | 1.264042766 | 0.129759907  | 1.19E-60    | 1 |
| OR2J2  | 26707     | GUAGUUCUCUUAUGUUA     | Plate 2 | E18 | 1563 | 196.61 | 112.04 | 0.444341755 | -1.438730584 | 1.61E-47    | 0 |
| OR2J2  | 26707     | CAGAAAGUCUUAUGGAAU    | Plate 2 | F18 | 1133 | 92.39  | 452.70 | 0.348742148 | -1.788239569 | 4.31E-35    | 0 |
| OR2J2  | 26707     | UAUGUUAUUAUGUUAUUA    | Plate 2 | G18 | 1367 | 164.24 | 222.48 | 1.473964982 | 0.291230041  | 1.25E-57    | 1 |
| OR2J2  | 26707     | GUAGUCUGUUAUGGAAUUA   | Plate 2 | H18 | 84   | 59.87  | 88.67  | 1.420182864 | 0.237604496  | 4.63E-23    | 1 |
| OR2T5  | 401993    | ACACGAGAAUCUGGAAUUA   | Plate 3 | I21 | 870  | 99.32  | 293.41 | 0.647208393 | -0.799593001 | 0.941880325 | 0 |
| OR2T5  | 401993    | ACAUCCAGCUCUUAUCUUA   | Plate 3 | J21 | 1328 | 139.18 | 255.53 | 1.021530222 | -0.141163334 | 1.69E-31    | 0 |
| OR2T5  | 401993    | GAGCCAGCUGUUAUCUUA    | Plate 3 | K21 | 770  | 179.60 | 209.35 | 1.672363677 | 0.569993392  | 4.63E-63    | 0 |
| OR2T5  | 401993    | CUGUGAAUCUGGUCUUAU    | Plate 3 | L21 | 256  | 86.11  | 63.83  | 1.947646015 | 0.78983627   | 7.37E-72    | 1 |
| OR5E2  | 119678    | GAGAGAACUCUUAUGUUA    | Plate 2 | M5  | 659  | 109.32 | 223.85 | 1.187141976 | -0.020979725 | 5.03E-28    | 0 |
| OR5E2  | 119678    | GCUCAAUUCUGUUAUUAU    | Plate 2 | N5  | 952  | 207.77 | 303.98 | 1.522171109 | 0.337658334  | 0.00000521  | 1 |
| OR5E2  | 119678    | GCUAUUCUUAUGGUGUUA    | Plate 2 | O5  | 898  | 546.09 | 127.02 | 15.05118334 | 3.64332804   | 7.34E-236   | 1 |
| OR5E2  | 119678    | CCAUUAUCUUAUGGAAUUA   | Plate 2 | P5  | 773  | 80.70  | 387.06 | 0.472656778 | -1.349607361 | 0.241738176 | 1 |
| OR5R1  | 219479    | GGUGGAGUCUUAUGUUA     | Plate 1 | E15 | 1030 | 86.09  | 321.79 | 0.483685229 | -1.239743822 | 0.949322025 | 0 |
| OR5R1  | 219479    | GCUAUUAUCACGAAAGUUA   | Plate 1 | F15 | 1063 | 128.90 | 305.13 | 0.796824712 | -0.519549911 | 1.55E-43    | 0 |
| OR5R1  | 219479    | GGAAUUAUCUGGAGAAUUA   | Plate 1 | G15 | 1590 | 137.36 | 468.62 | 0.563721561 | -1.018829554 | 0.003944782 | 0 |
| OR5R1  | 219479    | GACGCAACACCAUUCUUA    | Plate 1 | H15 | 390  | 177.97 | 145.54 | 3.224985879 | 1.497408636  | 2.18E-55    | 1 |
| OR6C68 | 403284    | GACGAGCUCUUAUGUUA     | Plate 3 | E12 | 626  | 134.76 | 400.67 | 0.623662552 | -0.853057681 | 0.0000274   | 0 |
| OR6C68 | 403284    | GUUCUGUUAUCACAUUAU    | Plate 3 | F12 | 124  | 79.39  | 152.37 | 1.297895254 | 0.204278734  | 9.47E-11    | 1 |
| OR6C68 | 403284    | GUCCAAAGUUAUCUUAUA    | Plate 3 | G12 | 874  | 97.55  | 438.47 | 0.463764698 | -1.280430311 | 7.91E-23    | 0 |
| OR6C68 | 403284    | CCAUUAUCUUAUGUUAUUA   | Plate 3 | H12 | 924  | 108.68 | 71.41  | 2.962535556 | 1.394937248  | 9.94E-119   | 1 |
| P4HTM  | 54681     | GACGAGGUCUUAUCUUAUC   | Plate 4 | M20 | 577  | 42.61  | 228.51 | 0.574068504 | -1.008990558 | 0.0000093   | 0 |
| P4HTM  | 54681     | UCAAGCCGUCUCUUAUCGUA  | Plate 4 | N20 | 742  | 112.76 | 187.78 | 1.138040229 | -0.021733811 | 1.25E-33    | 0 |
| P4HTM  | 54681     | CGUCGAGUUAUCGUGUUA    | Plate 4 | O20 | 1507 | 132.41 | 68.49  | 3.808193785 | 1.720821527  | 1.13E-205   | 1 |
| P4HTM  | 54681     | AGGUGGUGGUGGUGGAGUUA  | Plate 4 | P20 | 941  | 34.49  | 106.40 | 0.666510758 | -0.7935853   | 5.08E-37    | 0 |
| PALLD  | 23022     | GACUUAAGCUGGAAUUAU    | Plate 5 | M14 | 592  | 37.06  | 220.34 | 0.358259165 | -1.654852017 | 0.011561011 | 0 |
| PALLD  | 23022     | GCACUCUUAUCUUAUCAAU   | Plate 5 | N14 | 822  | 39.72  | 173.94 | 0.586843515 | -0.942879774 | 1.37E-10    | 1 |
| PALLD  | 23022     | UGCAACUGUUAUCUUAUUA   | Plate 5 | O14 | 1021 | 202.53 | 194.66 | 1.808896204 | 0.681182095  | 6.41E-62    | 1 |
| PALLD  | 23022     | GCUGGAAUCUGGUGUUAU    | Plate 5 | P14 | 1204 | 168.36 | 399.87 | 0.683470377 | -0.722976817 | 8.81E-16    | 0 |
| PAMR1  | 25891     | GACGAGCUCUUAUCGACAA   | Plate 5 | I16 | 234  | 89.19  | 144.95 | 1.292810178 | 0.19658293   | 5.3E-24     | 1 |
| PAMR1  | 25891     | CAACGAGCCUUAUCGUAUA   | Plate 5 | J16 | 676  | 256.15 | 147.94 | 2.521028909 | 1.16008513   | 1.61E-165   | 1 |
| PAMR1  | 25891     | GAUUAUCGUGUUAUCGCGCA  | Plate 5 | K16 | 65   | 104.43 | 53.25  | 2.469320514 | 1.130186576  | 7.2E-19     | 1 |
| PAMR1  | 25891     | GAUCAGUUAUCGUGGUCUUA  | Plate 5 | L16 | 1399 | 142.36 | 211.96 | 1.384545265 | 0.295484689  | 1.78E-29    | 1 |
| PAQR7  | 164091    | GCACACUUAUCUUAUGUUA   | Plate 2 | I4  | 1120 | 347.12 | 175.00 | 3.828950532 | 1.668476813  | 1.14E-160   | 1 |
| PAQR7  | 164091    | UAACAAGUUAUCGAGAAUUA  | Plate 2 | J4  | 571  | 263.64 | 370.23 | 1.513660757 | 0.329569695  | 6.27E-27    | 1 |
| PAQR7  | 164091    | GCACAACGAGCCGUGUUAU   | Plate 2 | K4  | 1636 | 180.42 | 197.09 | 1.970452173 | 0.710054524  | 1E-70       | 1 |
| PAQR7  | 164091    | GUACAGCGCAACUUAUGUUA  | Plate 2 | L4  | 749  | 290.42 | 202.14 | 3.974081502 | 1.722149252  | 1.25E-128   | 1 |
| PARP12 | 64761     | GAUUAAGCUCUUAUGUUA    | Plate 3 | M22 | 1346 | 67.44  | 197.54 | 0.699346386 | -0.687816118 | 0.000140096 | 0 |
| PARP12 | 64761     | GCAUGGCAUUAUCUUAUGUUA | Plate 3 | N22 | 953  | 73.95  | 323.15 | 0.551606965 | -1.030182644 | 1.87E-12    | 0 |
| PARP12 | 64761     | UAUGAUCGUGGUGGAGUUA   | Plate 3 | O22 | 800  | 124.28 | 200.66 | 1.127172362 | 0.000812921  | 3.47E-61    | 1 |
| PARP12 | 64761     | GCACUGAUCUUAUUGGUAU   | Plate 3 | P22 | 1441 | 111.41 | 268.21 | 0.725452986 | -0.634941194 | 0.060462233 | 0 |
| PARP2  | 10038     | AAGGAAUUCUUAUGGUAU    | Plate 2 | E22 | 1230 | 53.39  | 340.76 | 0.275583129 | -2.127912734 | 2.26E-17    | 0 |
| PARP2  | 10038     | ACAGCUGAUCUUAUCGUGUUA | Plate 2 | F22 | 1420 | 68.32  | 271.04 | 0.501680146 | -1.263632459 | 4.62E-08    | 0 |
| PARP2  | 10038     | GCACAGACGAGGUGGAGUUA  | Plate 2 | G22 | 1313 | 89.80  | 248.19 | 0.871968589 | -0.466124139 | 0.00000489  | 0 |
| PARP2  | 10038     | ACAAUUGGAGAAUUCGAGA   | Plate 2 | H22 | 1493 | 107.34 | 335.68 | 0.554469484 | -1.119292242 | 0.812210749 | 0 |
| PATE1  | 160065    | GACUCUGGAGUUAUCGAGAA  | Plate 2 | M19 | 1536 | 247.56 | 273.20 | 1.521690233 | 0.337202494  | 5.47E-99    | 1 |
| PATE1  | 160065    | GAGAAUUAUCGAGUUAUUA   | Plate 2 | N19 | 772  | 70.29  | 375.54 | 0.494794595 | -1.283570563 | 5.22E-09    | 0 |
| PATE1  | 160065    | GCUAUUAUCGAGUUAUCUUA  | Plate 2 | O19 | 133  | 58.07  | 148.26 | 0.5948495   | -1.017875598 | 3.76E-08    | 0 |
| PATE1  | 160065    | GAUGGUAUUCUUAUCGUGUUA | Plate 2 | P19 | 1024 | 211.15 | 363.77 | 0.989345217 | -0.283926288 | 0.000000416 | 0 |
| PATE3  | 100169851 | GCGCAUUAUCUUAUCGAGAA  | Plate 5 | M3  | 453  | 179.00 | 245.00 | 1.158551528 | 0.038394679  | 2.97E-13    | 1 |
| PATE3  | 100169851 | ACAUUGGUGUUAUCGAGAAU  | Plate   |     |      |        |        |             |              |             |   |

|          |        |                       |         |     |      |        |        |             |              |             |   |   |
|----------|--------|-----------------------|---------|-----|------|--------|--------|-------------|--------------|-------------|---|---|
| PHF23    | 79142  | CUACCUUGCUUGAGAAGAU   | Plate 1 | L4  | 368  | 52.75  | 214.32 | 0.926846915 | -0.30148123  | 3.36E-19    | 0 | 2 |
| PHF3     | 23469  | UCAAGUAGGUGCGGAGGAUA  | Plate 5 | I20 | 966  | 71.62  | 372.66 | 0.50205398  | -1.168013139 | 0.030816723 | 0 | 0 |
| PHF3     | 23469  | GGAGUUGACUCUUAUGCUA   | Plate 5 | J20 | 1446 | 122.52 | 233.84 | 0.956325972 | -0.23835317  | 1.04E-20    | 0 | 0 |
| PHF3     | 23469  | CGAUUAGGUAUCUUAUGCUA  | Plate 5 | K20 | 1350 | 271.61 | 122.32 | 3.493372933 | 1.630693133  | 5.92E-247   | 1 | 1 |
| PHF3     | 23469  | GGACGAAGUAGCCUGUUA    | Plate 5 | L20 | 486  | 83.07  | 254.43 | 1.262789137 | 0.162866223  | 0.001846445 | 1 | 1 |
| PHOSPHO1 | 162466 | GGAAACGGGUGCAGAUUGG   | Plate 3 | M15 | 99   | 128.78 | 90.44  | 1.782034529 | 0.661630069  | 3.46E-22    | 1 | 1 |
| PHOSPHO1 | 162466 | CUACGAAGCCAUCCUUCUUG  | Plate 3 | N15 | 1011 | 156.07 | 235.28 | 1.27121976  | 0.174318234  | 1.55E-47    | 1 | 1 |
| PHOSPHO1 | 162466 | CCUUCGAGGUGAUUCUCAU   | Plate 3 | O15 | 1263 | 67.43  | 392.81 | 0.321627756 | -1.808431403 | 1.04E-34    | 0 | 0 |
| PHOSPHO1 | 162466 | GGAAACGGGUGCAGAUUGG   | Plate 3 | P15 | 600  | 51.76  | 576.66 | 0.256676935 | -2.133869655 | 1.63E-47    | 0 | 0 |
| PITHD1   | 57095  | GAGAUAGACUGUAACAAGA   | Plate 2 | M15 | 1519 | 69.51  | 240.70 | 0.54681648  | -1.139343581 | 2.84E-09    | 0 | 1 |
| PITHD1   | 57095  | GAGAUAGACUGUAACAAGA   | Plate 2 | N15 | 664  | 235.08 | 271.17 | 2.167660443 | 0.847666572  | 2.48E-42    | 1 | 1 |
| PITHD1   | 57095  | CAUCUGCAAUUAUCGGAAGCA | Plate 2 | O15 | 525  | 95.66  | 215.36 | 0.860746549 | -0.484811813 | 5.83E-27    | 0 | 0 |
| PITHD1   | 57095  | GACCGACCGCUCAAGUUU    | Plate 2 | P15 | 640  | 155.56 | 247.22 | 1.199067616 | -0.006559194 | 0.000295442 | 0 | 0 |
| PKMYT1   | 9088   | GGUAAAAGGCUUCUAGUCA   | Plate 2 | I11 | 775  | 264.07 | 334.17 | 1.564348667 | 0.377089892  | 4.08E-15    | 1 | 1 |
| PKMYT1   | 9088   | CCACGCGAGAUCUGGAUUC   | Plate 2 | J11 | 466  | 116.43 | 428.08 | 0.540195895 | -1.156917627 | 0.6985564   | 0 | 0 |
| PKMYT1   | 9088   | GGGCGAGGCGCUCAGAGACU  | Plate 2 | K11 | 564  | 150.98 | 291.13 | 1.102741917 | -0.127377023 | 9.23E-22    | 0 | 0 |
| PKMYT1   | 9088   | ACGGAGAGGUCUUAACAAGU  | Plate 2 | L11 | 562  | 62.10  | 335.42 | 0.566877659 | -1.087362891 | 0.785599893 | 0 | 0 |
| PLA2R1   | 22925  | GCAAGGAGUAGCCUGUUA    | Plate 3 | I16 | 94   | 286.29 | 415.04 | 1.311821574 | 0.219676285  | 2.78E-09    | 1 | 2 |
| PLA2R1   | 22925  | GCAAGGAGUAGCCUGUUA    | Plate 3 | J16 | 204  | 153.08 | 374.45 | 1.039253047 | -0.116348244 | 4.04E-09    | 0 | 0 |
| PLA2R1   | 22925  | GCAAAUAGGACUUGGUUAU   | Plate 3 | K16 | 1571 | 146.40 | 169.21 | 1.419438448 | 0.333425068  | 2.27E-47    | 1 | 1 |
| PLA2R1   | 22925  | CCUAGUACUCUUAAGCGCA   | Plate 3 | L16 | 1341 | 55.11  | 243.60 | 0.382545228 | -1.558192991 | 0.007511009 | 0 | 0 |
| PLEKHH1  | 57475  | GGAAUAGUAGCUUAGUCAU   | Plate 3 | M4  | 603  | 64.35  | 356.29 | 0.446672918 | -1.334604529 | 1.97E-23    | 0 | 1 |
| PLEKHH1  | 57475  | GCAAGUAGUAGCUUAGUCAU  | Plate 3 | N4  | 250  | 66.81  | 132.91 | 1.167836576 | 0.05194318   | 1.04E-31    | 0 | 2 |
| PLEKHH1  | 57475  | GGCAUGCGGCUUCAGAAU    | Plate 3 | O4  | 912  | 65.23  | 393.47 | 0.5270743   | -1.095816968 | 0.141028518 | 0 | 1 |
| PLEKHH1  | 57475  | GCAAGUAGUAGCUUAGUCAU  | Plate 3 | P4  | 558  | 160.39 | 198.65 | 1.584320356 | 0.491968862  | 2.24E-49    | 1 | 0 |
| PLEKHM1  | 9842   | GCAAGUAGUAGCUUAGUCAU  | Plate 5 | A18 | 1064 | 50.94  | 335.95 | 0.276256157 | -2.029849006 | 7.34E-28    | 0 | 1 |
| PLEKHM1  | 9842   | GCAAGUAGUAGCUUAGUCAU  | Plate 5 | B18 | 996  | 85.27  | 168.88 | 0.864856053 | -0.383395597 | 9.02E-47    | 0 | 0 |
| PLEKHM1  | 9842   | CGAUUAGGUGUAGUAGUCAU  | Plate 5 | C18 | 800  | 347.68 | 41.33  | 12.43673587 | 3.46260845   | 4.53E-227   | 1 | 1 |
| PLEKHM1  | 9842   | CCUAGUAGUAGCUUAGUCAU  | Plate 5 | D18 | 1147 | 95.44  | 213.34 | 0.71298989  | -0.661974006 | 1.09E-59    | 0 | 0 |
| PNMA5    | 114824 | GAGGAGGCGGCAAGUUAU    | Plate 2 | M8  | 1174 | 106.02 | 355.19 | 0.503109009 | -1.25952928  | 0.387858117 | 0 | 1 |
| PNMA5    | 114824 | UGAAACUUCUUAUGCUCG    | Plate 2 | N8  | 1615 | 120.25 | 286.02 | 0.809415748 | -0.573519385 | 2.63E-11    | 0 | 0 |
| PNMA5    | 114824 | CGAGUUGCUUAGCGCCUA    | Plate 2 | O8  | 377  | 35.83  | 273.65 | 0.328690989 | -1.873668397 | 0.275986282 | 0 | 1 |
| PNMA5    | 114824 | CCAGUUCUUCGUCGCGCUU   | Plate 2 | P8  | 1492 | 200.52 | 118.51 | 4.368994453 | 1.858829065  | 1.04E-125   | 0 | 0 |
| POLA1    | 5422   | GCAGUAAACUAGUAGUUA    | Plate 2 | M11 | 323  | 375.26 | 81.66  | 6.854642179 | 2.508609149  | 3.11E-126   | 1 | 3 |
| POLA1    | 5422   | GCAAGUAGGACUUAUUAU    | Plate 2 | N11 | 753  | 389.45 | 85.48  | 5.847323003 | 2.279304098  | 3.31E-260   | 1 | 1 |
| POLA1    | 5422   | UAACUAGGCGGGAACUUAU   | Plate 2 | O11 | 68   | 97.25  | 175.72 | 1.129034396 | -0.09338277  | 1.46E-12    | 0 | 0 |
| POLA1    | 5422   | GCUCAAAGGUAUUAUUAU    | Plate 2 | P11 | 720  | 198.86 | 78.96  | 3.168247349 | 1.395212764  | 3.93E-191   | 1 | 1 |
| POLD1    | 5424   | GACUAGGUGCCGAGAGA     | Plate 1 | E3  | 1193 | 381.14 | 194.24 | 3.453304576 | 1.596093376  | 7.51E-200   | 1 | 4 |
| POLD1    | 5424   | CAAGAGGUGCCGAGAGA     | Plate 1 | F3  | 821  | 121.71 | 161.55 | 1.615654882 | 0.500234852  | 2.33E-39    | 1 | 1 |
| POLD1    | 5424   | GGAGGUAUCCAUUAGUCAU   | Plate 1 | G3  | 825  | 212.00 | 150.23 | 3.99737287  | 1.807167945  | 3.45E-76    | 1 | 1 |
| POLD1    | 5424   | CCGACGUGUAGCCGCUUAU   | Plate 1 | H3  | 1312 | 290.33 | 117.31 | 4.739797658 | 2.052941265  | 1.22E-227   | 1 | 1 |
| POLD3    | 10714  | GAAUAAACUUCUAGUCAU    | Plate 4 | E17 | 1285 | 48.90  | 231.04 | 0.468966995 | -1.30072707  | 0.272928704 | 0 | 3 |
| POLD3    | 10714  | GAAAGGAGUUAUUAUUAU    | Plate 4 | F17 | 1018 | 221.72 | 155.21 | 1.98105353  | 0.777982496  | 1.38E-87    | 1 | 1 |
| POLD3    | 10714  | ACAAGGAGUUAUUAUUAU    | Plate 4 | G17 | 97   | 61.83  | 55.75  | 2.2515854   | 0.962655831  | 1.54E-27    | 1 | 1 |
| POLD3    | 10714  | GCAAAACGCUUAGUCAU     | Plate 4 | H17 | 1109 | 294.99 | 215.25 | 2.38538663  | 1.045937753  | 4.19E-147   | 1 | 1 |
| POLR3K   | 51728  | GCAAGUAGGUGUAGUCAU    | Plate 2 | M10 | 1558 | 158.65 | 299.34 | 0.807850684 | -0.576311641 | 0.184226564 | 0 | 1 |
| POLR3K   | 51728  | GCAAGUAGGUGUAGUCAU    | Plate 2 | N10 | 781  | 422.25 | 80.06  | 13.88670298 | 3.527159998  | 1.66E-161   | 1 | 1 |
| POLR3K   | 51728  | GCAAGUAGGUGUAGUCAU    | Plate 2 | O10 | 175  | 48.29  | 417.34 | 0.398183024 | -1.596968587 | 0.94065559  | 0 | 0 |
| POLR3K   | 51728  | CCAAAGGUAUUAUUAUUAU   | Plate 2 | P10 | 1532 | 73.19  | 353.95 | 0.391828083 | -1.620179501 | 0.00000024  | 0 | 0 |
| POUF3    | 5455   | GCUCUUAUUGGUGUAGUCAU  | Plate 4 | E14 | 1107 | 25.73  | 169.51 | 0.303573818 | -1.928166094 | 0.222904883 | 0 | 0 |
| POUF3    | 5455   | UAAGUAGGUGUAGUCAU     | Plate 4 | F14 | 1057 | 76.72  | 281.44 | 0.541675434 | -1.092784799 | 2.22E-12    | 0 | 0 |
| POUF3    | 5455   | CGCAAGGUGGUGUAGUCAU   | Plate 4 | G14 | 358  | 65.96  | 164.70 | 0.778452672 | -0.569604133 | 2.52E-24    | 0 | 0 |
| POUF3    | 5455   | CCGCGGAGUAGUCAU       | Plate 4 | H14 | 425  | 46.96  | 171.15 | 0.887074191 | -0.381158691 | 7.37E-24    | 0 | 0 |
| PPP2R5B  | 5526   | GCAAGUAGGUGUAGUCAU    | Plate 4 | A14 | 1043 | 149.62 | 328.67 | 1.945347396 | 0.751742444  | 0.002036378 | 1 | 2 |
| PPP2R5B  | 5526   | GCAAGUAGGUGUAGUCAU    | Plate 4 | B14 | 888  | 158.69 | 283.82 | 1.084576958 | -0.091152942 | 1.36E-23    | 0 | 0 |
| PPP2R5B  | 5526   | UCAAGUAGGUGUAGUCAU    | Plate 4 | C14 | 648  | 459.32 | 159.64 | 6.315028744 | 2.450503933  | 6.52E-106   | 1 | 1 |
| PPP2R5B  | 5526   | UCAGGAGGUGUAGUCAU     | Plate 4 | D14 | 954  | 97.51  | 186.15 | 0.959247514 | -0.268310341 | 1.8E-41     | 0 | 0 |
| PRPSAP2  | 5636   | GAAAGUAGGUGUAGUCAU    | Plate 5 | I6  | 981  | 246.97 | 332.27 | 2.168693588 | 0.942898699  | 2.17E-31    | 1 | 1 |
| PRPSAP2  | 5636   | CAAAUAGGUGUAGUCAU     | Plate 5 | J6  | 233  | 298.61 | 178.82 | 4.524743159 | 2.00390837   | 1.23E-59    | 0 | 0 |
| PRPSAP2  | 5636   | GAAAGUAGGUGUAGUCAU    | Plate 5 | K6  | 1406 | 79.90  | 245.63 | 0.549080925 | -1.038836835 | 0.010853905 | 0 | 0 |
| PRPSAP2  | 5636   | GAAAGUAGGUGUAGUCAU    | Plate 5 | L6  | 871  | 55.05  | 411.08 | 0.38717788  | -1.542859095 | 6.02E-27    | 0 | 0 |
| PRTN3    | 5657   | UGGUAUAGGUGUAGUCAU    | Plate 1 | M22 | 1218 | 46.34  | 125.56 | 0.641762061 | -0.831737398 | 3.01E-78    | 0 | 1 |
| PRTN3    | 5657   | GAAUAGGUGUAGUCAU      | Plate 1 | N22 | 23   | 404.15 | 113.88 | 6.023263596 | 2.39866119   | 1.9E-09     | 1 | 0 |
| PRTN3    | 5657   | ACAAGUAGGUGUAGUCAU    | Plate 1 | O22 | 1125 | 196.88 | 428.53 | 0.746163171 | -0.614321148 | 1.49E-25    | 0 | 0 |
| PRTN3    | 5657   | CCGAGGUGUAGUCAU       | Plate 1 | P22 | 19   | 34.79  | 23.52  | 0.925145069 | -0.304132695 | 0.0000262   | 0 | 0 |
| PSME3    | 10197  | GGAAACAGUAGGUGUAGUCAU | Plate 3 | M20 | 669  | 73.08  | 286.27 | 0.743061659 | -0.600341387 | 3.76E-12    | 0 | 1 |
| PSME3    | 10197  | CAAAAGGUGUAGUCAU      | Plate 3 | N20 | 1447 | 90.38  | 336.93 | 0.450602048 | -1.321969447 | 1.74E-16    | 0 | 0 |
| PSME3    | 10197  | GAAUAGGUGUAGUCAU      | Plate 3 | O20 | 1614 | 81.75  | 292.59 | 0.541152425 | -1.057788304 | 0.00000667  | 0 | 0 |
| PSME3    | 10197  | UCGAAAGGUGUAGUCAU     | Plate 3 | P20 | 1454 | 108.82 | 116.28 | 2.053461029 | 0.866162346  | 7.45E-123   | 1 | 0 |
| PUS7L    | 83448  | UAUAGGUGUAGUCAU       | Plate 2 | I19 | 1368 | 128.57 | 363.42 | 0.641517194 | -0.908912371 | 0.201282407 | 0 | 0 |
| PUS7L    | 83448  | GCAAGUAGGUGUAGUCAU    | Plate 2 | J19 | 1597 | 105.57 | 188.22 | 1.105227087 | -0.124129383 | 2.73E-59    | 0 | 0 |
| PUS7L    | 83448  | GGAGGUGUAGUCAU        | Plate 2 | K19 | 1392 | 130.41 | 256.10 | 1.018662941 | -0.241795443 | 2.21E-28    | 0 | 0 |
| PUS7L    | 83448  | UCAGGUGUAGUCAU        | Plate 2 | L19 | 379  | 91.42  | 372.02 | 0.486970926 | -1.306564663 | 0.000951207 | 0 | 0 |
| R3HDM2   | 22864  | CAACGAGGUGUAGUCAU     | Plate 5 | I18 | 1162 | 72.36  | 381.90 | 0.401105243 | -1.491874803 | 0.945308366 | 0 | 2 |
| R3HDM2   | 22864  | GUGAGUAGGUGUAGUCAU    | Plate 5 | J18 | 1114 | 99.68  | 520.46 | 0.329278703 | -1.77654642  | 2.28E-114   | 0 | 0 |
| R3HDM2   | 22864  | GGCAAGGUGUAGUCAU      | Plate 5 | K18 | 1123 | 174.65 | 266.79 | 1.481135828 | 0.392776418  | 1.64E-71    | 1 | 1 |
| R3HDM2   | 22864  | CGGUGUAGGUGUAGUCAU    | Plate 5 | L18 | 163  | 86.61  | 87.73  | 1.549697703 | 0.458059286  | 1.83E-43    | 1 | 1 |
| R3HDM1   | 140902 | UGAAUAGGUGUAGUCAU     | Plate 6 | E4  | 910  | 62.94  | 518.08 | 0.238427337 | -2.283803266 | 1.19E-30    | 0 | 1 |
| R3HDM1   | 140902 | CGGUAAGGUGUAGUCAU     | Plate 6 | F4  | 924  | 227.23 | 342.46 | 1.456038372 | 0.326623546  | 0.169137963 | 0 | 0 |
| R3HDM1   | 140902 | CAAAAGGUGUAGUCAU      | Plate 6 |     |      |        |        |             |              |             |   |   |

|          |        |                      |         |     |      |        |        |             |              |             |   |   |
|----------|--------|----------------------|---------|-----|------|--------|--------|-------------|--------------|-------------|---|---|
| RASSF7   | 8045   | UGCCAGCGAUGUCCAGUUI  | Plate 3 | E7  | 74   | 243.50 | 177.52 | 2.496083694 | 1.147771087  | 2.62E-14    | 1 | 2 |
| RASSF7   | 8045   | GAACGCGUCCUUAUUCGUG  | Plate 3 | F7  | 1467 | 75.90  | 211.91 | 0.560038287 | -1.008297857 | 0.0001994   | 0 | 0 |
| RASSF7   | 8045   | GCACUAGCCCAAGCAUA    | Plate 3 | G7  | 723  | 28.78  | 315.34 | 0.297324463 | -1.921785148 | 0.008056327 | 0 | 0 |
| RASSF7   | 8045   | CAGCAGAGCGAGCCUGCA   | Plate 3 | H7  | 475  | 247.43 | 161.02 | 4.512667408 | 2.002085231  | 5.58E-40    | 1 | 1 |
| RBM10    | 8241   | GCAGUAGUCCCGAAAUU    | Plate 2 | M22 | 114  | 104.87 | 155.59 | 1.149156404 | -0.067897041 | 9.12E-18    | 0 | 2 |
| RBM10    | 8241   | GGACUAGGCGCCUUAUGAA  | Plate 2 | N22 | 1267 | 130.66 | 224.47 | 1.194975575 | -0.011491079 | 2.79E-28    | 0 | 0 |
| RBM10    | 8241   | AGACCGGCGUUCUUAUGA   | Plate 2 | O22 | 221  | 183.81 | 92.67  | 3.332752945 | 1.468242167  | 9.22E-58    | 1 | 1 |
| RBM10    | 8241   | AGAAUGACAUGGAGCAAAU  | Plate 2 | P22 | 506  | 166.41 | 140.07 | 1.724448797 | 0.517663084  | 2.27E-77    | 1 | 1 |
| RBX1     | 9978   | GAGCGGUGUUAAGUGAAA   | Plate 5 | E5  | 567  | 275.73 | 208.72 | 2.499791176 | 1.14788005   | 1.5E-101    | 1 | 4 |
| RBX1     | 9978   | GCAUAGAAUGUCAAGCUAA  | Plate 5 | F5  | 509  | 292.07 | 239.18 | 3.056730181 | 1.438061678  | 1.89E-117   | 1 | 1 |
| RBX1     | 9978   | CAAGAAGCGCUUUGAAGU   | Plate 5 | G5  | 1068 | 333.10 | 247.39 | 2.822241178 | 1.322913749  | 1.27E-140   | 1 | 1 |
| RBX1     | 9978   | CAACAGAGAGUGGGAAUUC  | Plate 5 | H5  | 315  | 116.34 | 155.94 | 1.647685321 | 0.546513208  | 1.76E-42    | 1 | 1 |
| RCE1     | 9986   | GAGAUGGCGUAGGUGUUG   | Plate 2 | E19 | 1104 | 110.75 | 334.10 | 0.505445362 | -1.252845158 | 0.115308762 | 0 | 1 |
| RCE1     | 9986   | UUAUUGAGCAGCUGCGUUI  | Plate 2 | F19 | 396  | 195.13 | 192.88 | 1.897594595 | 0.656699597  | 2.69E-70    | 1 | 1 |
| RCE1     | 9986   | AUGCAGCUCUUAUGGAUU   | Plate 2 | G19 | 847  | 82.34  | 344.36 | 0.561205895 | -1.10187014  | 0.000458884 | 0 | 0 |
| RCE1     | 9986   | GACCUAUGCUCUGGAUAC   | Plate 2 | H19 | 1306 | 110.85 | 453.19 | 0.438869976 | -1.456606728 | 3.16E-45    | 1 | 1 |
| RFC1     | 5981   | GAGAUGACUUAUUGUGUA   | Plate 4 | I18 | 1290 | 220.05 | 280.63 | 1.329400204 | 0.202490113  | 1.84E-34    | 0 | 2 |
| RFC1     | 5981   | GUAAAUGCUCUCCGUAAG   | Plate 4 | J18 | 1167 | 76.23  | 256.49 | 0.521453514 | -1.147674817 | 9.92E-09    | 0 | 0 |
| RFC1     | 5981   | GGAAUUAUUGGCGUGAUA   | Plate 4 | K18 | 922  | 74.81  | 187.27 | 0.703208799 | -0.716260341 | 6.85E-44    | 0 | 0 |
| RFC1     | 5981   | GGACACAUUAUUAUGAUG   | Plate 4 | L18 | 1678 | 222.96 | 270.70 | 1.299829351 | 0.170036862  | 4.93E-42    | 1 | 1 |
| RFC3     | 5983   | GAAAUGAGCACCACUUGCAA | Plate 1 | A16 | 794  | 248.53 | 357.93 | 1.188845296 | 0.057676783  | 1.02E-65    | 1 | 3 |
| RFC3     | 5983   | CAUCACAACUCCUUAUAA   | Plate 1 | B16 | 1077 | 229.45 | 202.10 | 2.238742563 | 0.970804432  | 3.98E-84    | 1 | 1 |
| RFC3     | 5983   | CACAACAACUUAAGCAAAA  | Plate 1 | C16 | 219  | 429.23 | 236.00 | 3.661575583 | 1.680580369  | 1.3E-47     | 1 | 1 |
| RFC3     | 5983   | CAAUUGCUAUAUGCAGUCA  | Plate 1 | D16 | 607  | 102.76 | 243.41 | 0.586969112 | -0.960527715 | 3.4E-43     | 0 | 0 |
| RFC4     | 5984   | GGAAUUGCGUUAUGUUGU   | Plate 5 | A6  | 717  | 330.13 | 306.39 | 1.870765217 | 0.729700978  | 6.12E-37    | 1 | 3 |
| RFC4     | 5984   | CAACUCAGCUCUGCAUAUC  | Plate 5 | B6  | 605  | 111.33 | 201.70 | 1.453024718 | 0.365131714  | 5.39E-49    | 1 | 1 |
| RFC4     | 5984   | GGCAAGGAGCAGGAGGUA   | Plate 5 | C6  | 408  | 99.39  | 231.56 | 1.671822402 | 0.567494066  | 1.51E-39    | 1 | 1 |
| RFC4     | 5984   | UCAAAGCGCUACUCGAUUA  | Plate 5 | D6  | 1199 | 160.35 | 331.75 | 0.738251034 | -0.611744154 | 0.00000407  | 0 | 0 |
| RIMBP2   | 23504  | GAGAAGCGUUAUGGAAUUC  | Plate 5 | I10 | 1117 | 89.10  | 383.04 | 0.405626925 | -1.475702207 | 0.140038728 | 0 | 0 |
| RIMBP2   | 23504  | GUCUCGCGAUCGGUGAAU   | Plate 5 | J10 | 1190 | 192.84 | 361.78 | 0.725619815 | -0.636641774 | 3.2E-18     | 0 | 0 |
| RIMBP2   | 23504  | GGCCAGAUCAUCAAGGUUU  | Plate 5 | K10 | 569  | 90.26  | 673.36 | 0.340285215 | -1.729111155 | 1.96E-19    | 0 | 0 |
| RIMBP2   | 23504  | CAAUUGAGCUCUACCGUAA  | Plate 5 | L10 | 1520 | 129.30 | 267.97 | 1.022019494 | -0.142504818 | 2.07E-21    | 0 | 0 |
| RNASEH2C | 84153  | GGACUUGCAGCCUUAUUAU  | Plate 3 | E11 | 1212 | 207.63 | 418.19 | 0.946709471 | -0.250901562 | 9.55E-26    | 0 | 2 |
| RNASEH2C | 84153  | GAUACGUGAUGGUGACAGA  | Plate 3 | F11 | 1154 | 101.46 | 356.05 | 0.460101564 | -1.291870956 | 2.49E-17    | 1 | 1 |
| RNASEH2C | 84153  | CAAAUGCGUGGGCGCUUA   | Plate 3 | G11 | 157  | 110.02 | 180.61 | 1.13902953  | 0.015909928  | 3.16E-32    | 1 | 1 |
| RNASEH2C | 84153  | CGGCAGCGAUCACGCACA   | Plate 3 | H11 | 193  | 188.94 | 23.85  | 8.749229061 | 2.957260678  | 7.58E-83    | 1 | 1 |
| RNASEH2C | 84153  | GGACUUGCAGCCUUAUUAU  | Plate 6 | M6  | 1050 | 231.02 | 510.59 | 0.470366676 | -0.117319724 | 4.2E-17     | 0 | 0 |
| RNASEH2C | 84153  | GAUACGUGAUGGUGACAGA  | Plate 6 | N6  | 1178 | 149.54 | 353.00 | 0.930671011 | -0.319081656 | 0.349317626 | 0 | 0 |
| RNASEH2C | 84153  | CAAAUGCGUGGGCGCUUA   | Plate 6 | O6  | 192  | 62.21  | 215.54 | 1.029480601 | -0.173508185 | 2.74E-29    | 0 | 0 |
| RNASEH2C | 84153  | CGGCAGCGAUCACGCACA   | Plate 6 | P6  | 552  | 228.42 | 31.07  | 12.18873218 | 3.392051335  | 1.9E-215    | 1 | 1 |
| RNF111   | 54778  | GAGAAGCGUUAUUAAGAA   | Plate 5 | E10 | 1370 | 69.56  | 241.59 | 0.448832678 | -1.236334014 | 5.11E-12    | 0 | 2 |
| RNF111   | 54778  | GAGUUGAUGAUAUUAUAG   | Plate 5 | F10 | 584  | 215.75 | 537.21 | 0.847918987 | -0.411929196 | 0.307618137 | 0 | 0 |
| RNF111   | 54778  | GAAGAAGAAUUAUUAUUA   | Plate 5 | G10 | 1078 | 214.58 | 313.75 | 1.3445529   | 0.253198985  | 6.05E-13    | 1 | 1 |
| RNF111   | 54778  | AGAUUUAUUAUUAUUAU    | Plate 5 | H10 | 1156 | 223.61 | 144.85 | 3.651963398 | 1.694744774  | 1.67E-77    | 1 | 1 |
| RNF146   | 81847  | GGACGUCGAGGAGGAAUUA  | Plate 6 | E5  | 718  | 58.06  | 344.82 | 0.433286617 | -1.422031249 | 0.000749514 | 0 | 0 |
| RNF146   | 81847  | GAAGAAGAUCAUGAUAUC   | Plate 6 | F5  | 948  | 45.24  | 592.78 | 0.153642559 | -2.917775023 | 5.95E-133   | 0 | 0 |
| RNF146   | 81847  | GGAUGUAUUCGAGUUGU    | Plate 6 | G5  | 21   | 168.57 | 173.11 | 2.170290167 | 0.902463113  | 0.0000126   | 1 | 1 |
| RNF146   | 81847  | UAAACUAGCUCUUAUUAU   | Plate 6 | H5  | 722  | 102.50 | 384.11 | 0.610125124 | -0.928247787 | 0.417118599 | 0 | 0 |
| RNF186   | 54546  | GACAACCCUGGUCUUAUC   | Plate 6 | I5  | 719  | 302.41 | 381.05 | 1.532212337 | 0.400191412  | 1.53E-09    | 1 | 2 |
| RNF186   | 54546  | GCACAAGACCCUGCAACA   | Plate 6 | J5  | 453  | 268.40 | 266.46 | 2.812611009 | 1.276485207  | 2.39E-36    | 1 | 1 |
| RNF186   | 54546  | GGAUGGACAGGAAGGUA    | Plate 6 | K5  | 715  | 87.35  | 300.22 | 0.761681306 | -0.608165437 | 7.03E-13    | 0 | 0 |
| RNF186   | 54546  | CAUCUACCCGGUGUCUUA   | Plate 6 | L5  | 1169 | 294.68 | 267.29 | 2.338856828 | 1.01037872   | 1.43E-66    | 1 | 1 |
| RNF19B   | 127544 | GAGGAAUGCGUUAUUAUCA  | Plate 6 | M4  | 1213 | 58.70  | 318.97 | 0.362476355 | -1.679466038 | 0.037304397 | 0 | 0 |
| RNF19B   | 127544 | GACAGAGAAUCAAUAUUA   | Plate 6 | N4  | 1149 | 158.85 | 444.67 | 0.919184635 | -0.336988243 | 0.041533476 | 0 | 0 |
| RNF19B   | 127544 | GAAGAAGGUGAAAUUUA    | Plate 6 | O4  | 1440 | 88.45  | 322.82 | 0.509624379 | -1.187918632 | 0.000622382 | 0 | 0 |
| RNF19B   | 127544 | GGACUGCGUUAUUGCUGU   | Plate 6 | P4  | 494  | 514.40 | 303.21 | 6.93327908  | 2.578112759  | 7.87E-70    | 1 | 1 |
| RNF208   | 727800 | GGACAUUGCGUUAUUGGAA  | Plate 5 | I19 | 754  | 342.31 | 267.06 | 3.021550403 | 1.421361476  | 2.3E-48     | 1 | 4 |
| RNF208   | 727800 | UGAAAAGUUCUCCUGAGCU  | Plate 5 | J19 | 1142 | 303.34 | 168.51 | 3.809237615 | 1.755574752  | 1.24E-184   | 1 | 1 |
| RNF208   | 727800 | CAGAGUAUCUUAUGCAACA  | Plate 5 | K19 | 438  | 146.54 | 152.91 | 2.788586493 | 1.305606488  | 2.29E-67    | 1 | 1 |
| RNF208   | 727800 | UAUGGUAUCUUAUGGAAU   | Plate 5 | L19 | 1520 | 123.60 | 191.41 | 1.708957942 | 0.599189361  | 9.19E-77    | 1 | 1 |
| RNF26    | 79102  | CGUAGUGGCGUUAUUGCU   | Plate 5 | M21 | 753  | 360.63 | 113.56 | 11.12572225 | 3.301899558  | 6.51E-129   | 1 | 2 |
| RNF26    | 79102  | GCCGAGAGGCGUUAUUA    | Plate 5 | N21 | 1441 | 67.11  | 395.67 | 0.362217724 | -1.638998484 | 2.72E-21    | 0 | 0 |
| RNF26    | 79102  | GCAAGGAGGAGGAGGAA    | Plate 5 | O21 | 1167 | 164.49 | 180.01 | 2.180009288 | 0.95569133   | 1.5E-62     | 1 | 1 |
| RNF26    | 79102  | GAGAGGAGGAGGAGGCGU   | Plate 5 | P21 | 904  | 130.05 | 238.54 | 1.107461494 | -0.026670994 | 6.73E-12    | 0 | 0 |
| RNF31    | 55072  | GCAAGAAUGCGUUAUUAU   | Plate 6 | I3  | 1195 | 128.62 | 245.84 | 1.034272146 | -0.166808981 | 4E-12       | 0 | 2 |
| RNF31    | 55072  | GCGAUUAUUGGCUUAUCA   | Plate 6 | J3  | 847  | 166.19 | 343.74 | 1.419958412 | 0.290423846  | 0.0000233   | 1 | 1 |
| RNF31    | 55072  | GGCGUGGUGUUAUUAUUA   | Plate 6 | K3  | 1395 | 163.92 | 301.98 | 1.214354628 | 0.064764962  | 0.112881782 | 0 | 0 |
| RNF31    | 55072  | GUUAUGGUAUUAUUAUUA   | Plate 6 | L3  | 949  | 360.51 | 201.75 | 3.729834782 | 1.683686895  | 1.95E-172   | 1 | 1 |
| RNF39    | 80352  | AGGAAGACUUAUGGAGCAU  | Plate 5 | E17 | 387  | 115.20 | 240.05 | 1.402914598 | 0.314499656  | 1.59E-33    | 1 | 2 |
| RNF39    | 80352  | CCGCAUUGUACCGCGGAA   | Plate 5 | F17 | 968  | 105.66 | 251.46 | 1.307666028 | 0.213066598  | 4.79E-29    | 1 | 1 |
| RNF39    | 80352  | GAGGAUUAUGGAGGAGCAU  | Plate 5 | G17 | 41   | 93.88  | 283.13 | 0.834800608 | -0.434978037 | 0.078485404 | 0 | 0 |
| RNF39    | 80352  | AAGAUUAUUAUGGAGCAU   | Plate 5 | H17 | 1535 | 112.94 | 216.12 | 0.870418197 | -0.374146909 | 3.65E-42    | 0 | 0 |
| RNFT1    | 51136  | CAGAAUUAUGGAGGAGCAU  | Plate 5 | A22 | 981  | 95.13  | 289.08 | 0.687592353 | -0.714302127 | 0.008598664 | 0 | 2 |
| RNFT1    | 51136  | GAUUGGCGUUAUUAUUAU   | Plate 5 | B22 | 652  | 227.12 | 132.30 | 4.301648412 | 1.930962082  | 3.55E-127   | 1 | 1 |
| RNFT1    | 51136  | CAGCAUUAUUAUGGAGUUA  | Plate 5 | C22 | 817  | 88.47  | 169.00 | 1.323878373 | 0.230843053  | 1.07E-24    | 1 | 1 |
| RNFT1    | 51136  | GCAAGCUCUUAUUAUUAU   | Plate 5 | D22 | 130  | 120.67 | 354.45 | 0.836045147 | -0.432274776 | 0.000002    | 0 | 0 |
| ROMO1    | 140823 | GGAAUUAUGGAGGAGGAG   | Plate 3 | A15 | 636  | 111.12 | 290.61 | 0.700181728 | -0.686093904 | 0.00000387  | 0 | 0 |
| ROMO1    | 140823 | CACAUUAUUGGAGGAGGAG  | Plate 3 | B15 | 450  | 84.59  | 346.82 | 0.467719741 | -1.268178993 | 0.884692031 | 0 | 0 |
| ROMO1    | 140823 | CUGCUUCGACCGGUGUCA   | Plate 3 | C15 | 725  | 112.80 | 348.24 | 0.781282929 | -0.527978224 | 0.02366396  | 0 | 0 |
| ROMO1    | 140823 | CAGCCUUAUGGAGGAGGAG  | Plate 3 | D15 | 914  | 145.87 | 245.10 | 0.902739576 | -0.319513461 | 2.24E-15    | 0 | 0 |
| RP1      | 6117   | GAGGUGAGGAGGAGGAGU   | Plate 1 | A3  | 31   | 224.72 | 47.80  | 4.91611514  | 2.105634498  | 1.54E-12    | 1 | 4 |
| RP1      | 6117   | GCAUUAUGGAGGAGGAGU   | Plate 1 | B3  | 18   | 848.30 | 255.73 | 5.226375887 | 2.193926681  | 0.00000128  | 1 | 1 |
| RP1      | 6117   | GAGGUGGAGGAGGAGGAGU  | Plate 1 | C3  | 62   | 721.30 | 71.49  | 17.49723779 | 3.937171076  | 2.29E-35    | 1 | 1 |
| RP1      | 6117   | CCUUAUGGAGGAGGAGGAGU | Plate 1 | D3  | 121  | 726.06 | 55.38  | 17.17923209 | 3.910709437  | 5.88E-65    | 1 | 1 |
| RP2      | 6118   | GAGGAAGGAGGAGGAGGAGU | Plate 1 | M3  | 800  | 456.34 | 124.77 | 5.667565516 | 2.310844956  | 3.45E-283   | 1 | 4 |
| RP2      | 6118   | CAAAUUAUGGAGGAGGAGU  | Plate 1 | N3  | 521  | 458.99 | 35.62  | 15.79868132 | 3.789848033  | 2.87E-245   | 1 | 1 |
| RP2      | 6118   | GAGGAAGGAGGAGGAGGAGU | Plate 1 | O3  | 235  | 737.33 | 97.11  | 11.65755035 | 3.351308549  | 4.4E-113    | 1 | 1 |
| RP2      | 6118   | GUGGAAGGAGGAGGAGGAGU | Plate 1 | P3  | 613  | 464.73 | 174.39 | 7.314295808 | 2.678834767  | 3.38E-175   | 1 | 1 |
|          |        |                      |         |     |      |        |        |             |              |             |   |   |

|           |        |                     |         |     |      |         |         |             |              |             |   |
|-----------|--------|---------------------|---------|-----|------|---------|---------|-------------|--------------|-------------|---|
| SEC11B    | 157708 | CGAUACCGAUGUCUGUCA  | Plate 1 | N6  | 307  | 681.72  | 172.15  | 6.168269857 | 2.432981676  | 3.8E-111    | 1 |
| SEC11B    | 157708 | GAUGAUGGAGUGGAGUA   | Plate 1 | O6  | 852  | 86.68   | 297.04  | 0.641233247 | -0.832963072 | 0.000029    | 0 |
| SEC11B    | 157708 | AUUCGUGUUGUAAGGAUA  | Plate 1 | P6  | 675  | 93.25   | 199.13  | 0.810605911 | -0.494811606 | 0.00000912  | 0 |
| SELENBP1  | 8991   | GCACUGAGCGCCAGAUUA  | Plate 2 | M14 | 731  | 98.80   | 235.14  | 0.672168625 | -0.841577101 | 2.16E-20    | 0 |
| SELENBP1  | 8991   | GGGAGCCACUUAUUAUUAU | Plate 2 | N14 | 1358 | 104.00  | 393.33  | 0.513933358 | -1.228819006 | 0.378777337 | 0 |
| SELENBP1  | 8991   | GUACAGCCGUCACACAAU  | Plate 2 | O14 | 311  | 25.31   | 87.64   | 0.574309169 | -1.068572709 | 2.8E-24     | 0 |
| SELENBP1  | 8991   | CCAAAGAAUUAUUCUGAAU | Plate 2 | P14 | 1165 | 234.92  | 277.51  | 2.170529886 | 0.849575078  | 8.25E-14    | 1 |
| SENP1     | 29843  | GGAAAGAGUUUGACACCAA | Plate 4 | E22 | 859  | 38.80   | 190.46  | 0.48791498  | -1.243583684 | 0.054966869 | 0 |
| SENP1     | 29843  | GCAAAUUGUGUGACUGUAU | Plate 4 | F22 | 1850 | 229.52  | 288.15  | 1.505057246 | 0.381532995  | 1.64E-58    | 1 |
| SENP1     | 29843  | GAUCAUAUUUCUACAU    | Plate 4 | G22 | 1651 | 191.79  | 295.46  | 1.338630381 | 0.212472295  | 2.4E-15     | 1 |
| SENP1     | 29843  | GCAUUUGCCGUGACCAUAU | Plate 4 | H22 | 387  | 178.24  | 259.84  | 3.280041023 | 1.505428491  | 2.59E-13    | 1 |
| SERPINA11 | 256394 | GGAGGCAGAUUAUGACUA  | Plate 4 | A9  | 1244 | 51.31   | 510.27  | 0.187094141 | -2.626449082 | 4.31E-153   | 0 |
| SERPINA11 | 256394 | CAUAUAACUCGAGACAU   | Plate 4 | B9  | 418  | 119.37  | 378.74  | 0.668470986 | -0.789348519 | 0.106341295 | 0 |
| SERPINA11 | 256394 | CCAACAUCACCAUCUUA   | Plate 4 | C9  | 1425 | 84.85   | 199.31  | 0.734908996 | -0.65264785  | 1.67E-24    | 0 |
| SERPINA11 | 256394 | CGGCAGCAUUAUUGGACA  | Plate 4 | D9  | 896  | 125.61  | 292.98  | 0.944538708 | -0.290603541 | 0.01443726  | 0 |
| SERPINA6  | 866    | CAUCAAGGUGGUCAUAU   | Plate 3 | M14 | 298  | 53.83   | 493.61  | 0.280599519 | -2.00531078  | 1.86E-09    | 0 |
| SERPINA6  | 866    | GCAAAUUCUCACGCAUCA  | Plate 3 | N14 | 581  | 170.60  | 89.78   | 2.783789483 | 1.305154893  | 1.39E-83    | 1 |
| SERPINA6  | 866    | ACAGCUAUGUCAAGAAUA  | Plate 3 | O14 | 174  | 46.53   | 185.50  | 0.498745109 | -1.175520625 | 0.169141721 | 0 |
| SERPINA6  | 866    | AGUCAAGGUCUUGGCUAU  | Plate 3 | P14 | 297  | 51.49   | 199.45  | 0.797027906 | -0.49919308  | 0.000000431 | 0 |
| SERPIND1  | 3053   | GAGAAUGUCUGCGCGAA   | Plate 4 | E20 | 712  | 76.27   | 323.86  | 0.429184896 | -1.428614156 | 0.048573324 | 0 |
| SERPIND1  | 3053   | GAAAUUACAGCUGGAGAA  | Plate 4 | F20 | 883  | 205.04  | 417.68  | 0.768703596 | -0.587786045 | 0.001990564 | 0 |
| SERPIND1  | 3053   | GCAAAGCCCGCUGGAUA   | Plate 4 | G20 | 790  | 40.30   | 199.99  | 0.2910609   | -1.988892414 | 0.0000023   | 0 |
| SERPIND1  | 3053   | GACAAGUCACUCGUAUU   | Plate 4 | H20 | 1214 | 203.69  | 299.47  | 1.094247539 | -0.078346228 | 1.94E-40    | 0 |
| SETD7     | 80854  | GGAGUGGUGGUAUUAUUAU | Plate 1 | E21 | 922  | 29.25   | 264.95  | 0.323753343 | -1.818917212 | 0.237196187 | 0 |
| SETD7     | 80854  | CAUAUUGCAUCACGAUAU  | Plate 1 | F21 | 1170 | 238.05  | 337.50  | 1.355955624 | 0.247425757  | 1.06E-62    | 1 |
| SETD7     | 80854  | CCUGGACGAUGACGGUAU  | Plate 1 | G21 | 1061 | 50.39   | 460.89  | 0.187949592 | -2.603466521 | 0.000000027 | 0 |
| SETD7     | 80854  | GCAUUGGUCGUGGUAU    | Plate 1 | H21 | 1522 | 116.38  | 173.07  | 1.319466037 | 0.208070009  | 1.74E-126   | 1 |
| SETDB1    | 9869   | GAUCAUGACUGGUCAAU   | Plate 3 | I4  | 381  | 99.40   | 191.68  | 1.942816331 | 0.786254297  | 6.98E-68    | 1 |
| SETDB1    | 9869   | GCAAGAGCUCACGCUUUG  | Plate 3 | J4  | 600  | 81.27   | 309.04  | 0.892802957 | -0.335481511 | 0.0000018   | 0 |
| SETDB1    | 9869   | AAGAUGGCUUUAUGUAU   | Plate 3 | K4  | 950  | 46.95   | 336.39  | 0.287965455 | -1.967927562 | 9.81E-17    | 0 |
| SETDB1    | 9869   | CAAGAUGGUGACUGGAUA  | Plate 3 | L4  | 398  | 248.70  | 247.36  | 3.409807659 | 1.59779514   | 1.78E-47    | 1 |
| SEZ6      | 124925 | GCAACAACUCACCGUCA   | Plate 4 | I13 | 13   | 697.04  | 57.96   | 16.18998667 | 3.808744525  | 0.0000287   | 1 |
| SEZ6      | 124925 | GUAGAGGUCUUAUCUUC   | Plate 4 | J13 | 1111 | 94.42   | 181.01  | 1.283270365 | 0.151539788  | 1.6E-32     | 1 |
| SEZ6      | 124925 | GUGUUAUCUUCUAUGAU   | Plate 4 | K13 | 1287 | 117.05  | 367.87  | 0.492731822 | -1.229410816 | 0.502547327 | 0 |
| SEZ6      | 124925 | UGGAAGGACAAACGCGCAU | Plate 4 | L13 | 451  | 141.83  | 123.57  | 1.761051772 | 0.608151955  | 1.58E-96    | 1 |
| SFRS17A   | 8227   | GUUCAGAGCUCUGGUGG   | Plate 5 | A9  | 1158 | 148.39  | 247.17  | 1.43435127  | 0.346470849  | 0.0000186   | 1 |
| SFRS17A   | 8227   | CCUUCAGCUCUGUACCUA  | Plate 5 | B9  | 1138 | 178.20  | 192.72  | 1.672747838 | 0.568292448  | 1.41E-96    | 1 |
| SFRS17A   | 8227   | GCAAGAGCCGACGACAG   | Plate 5 | C9  | 28   | 31.73   | 38.94   | 0.831838952 | -0.439551384 | 2.39E-08    | 0 |
| SFRS17A   | 8227   | GCAACAACCCUGGAGUA   | Plate 5 | D9  | 776  | 65.46   | 398.89  | 0.346623449 | -1.702486372 | 0.03833025  | 0 |
| SFTPD     | 6441   | GAGAGUCUGGUCUUAUC   | Plate 5 | E12 | 1029 | 173.79  | 314.90  | 1.184749916 | 0.070655027  | 0.834952661 | 0 |
| SFTPD     | 6441   | CAUUGCUCUGUGGAGAA   | Plate 5 | F12 | 706  | 118.25  | 455.03  | 0.472616947 | -1.255184263 | 0.006270811 | 0 |
| SFTPD     | 6441   | CAACGAUGAGCGGGUCA   | Plate 5 | G12 | 1044 | 35.85   | 366.60  | 0.239872305 | -2.23358903  | 2.78E-12    | 0 |
| SFTPD     | 6441   | GGCCUUAACAGGGAAGUA  | Plate 5 | H12 | 154  | 185.00  | 56.87   | 4.429472895 | 1.973207497  | 2.71E-44    | 1 |
| SFXN2     | 118980 | GCGCAUGUCUUCAGCUU   | Plate 5 | A3  | 2    | #DIV/0! | #DIV/0! | 1.105473046 | -0.029263682 | 0.216819127 | 0 |
| SFXN2     | 118980 | CGGCUAACUGGUAUAUA   | Plate 5 | B3  | 944  | 90.22   | 234.83  | 0.841274831 | -0.423278444 | 0.0000053   | 0 |
| SFXN2     | 118980 | GUAGUUAUUCUGGAUA    | Plate 5 | C3  | 1010 | 39.17   | 296.39  | 0.246063899 | -2.196822616 | 1.71E-15    | 0 |
| SFXN2     | 118980 | AUGGAAACUUGAGCCUA   | Plate 5 | D3  | 697  | 142.69  | 137.93  | 2.057763161 | 0.867149412  | 3.38E-70    | 1 |
| SHMT1     | 6470   | GAGCUGGCAUGAUUCUA   | Plate 1 | I5  | 1462 | 248.61  | 107.27  | 4.594450579 | 2.008008142  | 1.71E-274   | 1 |
| SHMT1     | 6470   | GAAAGGCGACGCUUCUC   | Plate 1 | J5  | 878  | 92.53   | 261.77  | 0.825663203 | -0.468258891 | 4.51E-31    | 0 |
| SHMT1     | 6470   | CCUAGCUCUUGCUUAAU   | Plate 1 | K5  | 860  | 168.63  | 395.11  | 1.013611549 | -0.17237934  | 3.36E-14    | 0 |
| SHMT1     | 6470   | UACGGAAGAUUGCAGUA   | Plate 1 | L5  | 999  | 84.46   | 540.82  | 0.297108458 | -1.942822624 | 1E-29       | 0 |
| SIRT2     | 22933  | GAGAUCAUUAUUAAGA    | Plate 1 | I12 | 1560 | 147.08  | 283.24  | 0.888027151 | -0.363208514 | 1.1E-18     | 0 |
| SIRT2     | 22933  | GAAUACCCUGGAGCAU    | Plate 1 | J12 | 995  | 39.86   | 391.99  | 0.187991064 | -2.603148214 | 2.7E-16     | 0 |
| SIRT2     | 22933  | GGGAAAGCUGCCGAGUC   | Plate 1 | K12 | 393  | 308.31  | 217.47  | 1.915017379 | 0.745473278  | 1.71E-51    | 1 |
| SIRT2     | 22933  | CGGCAGAAUACCCGUA    | Plate 1 | L12 | 630  | 292.77  | 201.48  | 2.71998496  | 1.251714467  | 2.1E-102    | 1 |
| SKA1      | 220134 | GGACUUAUCUGUAUUAU   | Plate 2 | E17 | 1535 | 163.93  | 184.13  | 1.459872229 | 0.277369899  | 1.93E-94    | 1 |
| SKA1      | 220134 | UCAAUGGUGUUCUUCGUA  | Plate 2 | F17 | 1284 | 120.54  | 121.19  | 1.551473557 | 0.365166899  | 1.56E-130   | 1 |
| SKA1      | 220134 | UAUAGGGAAGCUGCAUA   | Plate 2 | G17 | 1083 | 198.26  | 211.11  | 1.612695695 | 0.421002028  | 1.19E-70    | 1 |
| SKA1      | 220134 | CCGCUUAACUUAUAUAU   | Plate 2 | H17 | 856  | 224.34  | 239.14  | 1.867815654 | 0.632879865  | 7.97E-52    | 1 |
| SLC17A1   | 6568   | CAAAGAGCUCUGGUAUA   | Plate 4 | I5  | 825  | 145.60  | 306.46  | 0.838876193 | -0.461755559 | 0.037160021 | 0 |
| SLC17A1   | 6568   | GAAAGGCGGCAUCUUAU   | Plate 4 | J5  | 820  | 143.27  | 159.97  | 1.145189863 | -0.012698562 | 6.51E-46    | 0 |
| SLC17A1   | 6568   | GCACUUGUUAUUAUUAU   | Plate 4 | K5  | 1308 | 76.57   | 213.40  | 0.713029977 | -0.696250731 | 0.530531719 | 0 |
| SLC17A1   | 6568   | CGUAAUUGUCUGCGGAA   | Plate 4 | L5  | 1535 | 152.31  | 181.07  | 1.624753082 | 0.491935117  | 6.81E-54    | 1 |
| SLC30A8   | 169026 | GAAAGGUCUUGGAAUGA   | Plate 4 | I17 | 836  | 136.00  | 188.66  | 1.496652267 | 0.373453696  | 4.49E-29    | 1 |
| SLC30A8   | 169026 | GAAAGGUAUUAUUAAGC   | Plate 4 | J17 | 1554 | 181.04  | 171.01  | 1.868972341 | 0.693959851  | 4.28E-137   | 1 |
| SLC30A8   | 169026 | GGUGGUCACUGGCGUUA   | Plate 4 | K17 | 965  | 245.78  | 165.92  | 3.068510163 | 1.409252994  | 3.54E-39    | 1 |
| SLC30A8   | 169026 | GGUUAUAAAGGAAGCGA   | Plate 4 | L17 | 1550 | 86.41   | 164.47  | 1.237417161 | 0.09904658   | 5.94E-31    | 1 |
| SLC35B4   | 84912  | GAAAGGACCCACGCUUA   | Plate 4 | E16 | 7    | #DIV/0! | #DIV/0! | 1.951038676 | 0.75595701   | 0.011722525 | 0 |
| SLC35B4   | 84912  | UAAAGGUCUUCUUCUAGA  | Plate 4 | F16 | 1484 | 159.92  | 114.93  | 2.801977773 | 1.278160144  | 4.93E-134   | 1 |
| SLC35B4   | 84912  | GAACUUAUCUUCUUAUUA  | Plate 4 | G16 | 235  | 148.22  | 304.20  | 0.906229857 | -0.35033644  | 4.36E-11    | 0 |
| SLC35B4   | 84912  | GAAGUUAACCCUGCCUA   | Plate 4 | H16 | 908  | 120.12  | 294.38  | 0.638537304 | -0.855442555 | 5.57E-25    | 0 |
| SLC35E2   | 9906   | GGUUAUCGUGGUGGUAUA  | Plate 5 | A8  | 1116 | 462.28  | 163.40  | 6.840646216 | 2.600205087  | 1.23E-163   | 1 |
| SLC35E2   | 9906   | CCUCCAGGAGGAGGCGAA  | Plate 5 | B8  | 313  | 82.10   | 455.09  | 0.366803938 | -1.620846501 | 0.869420659 | 0 |
| SLC35E2   | 9906   | CAAUCUUCUUAUGGAGUA  | Plate 5 | C8  | 534  | 274.72  | 227.03  | 3.161274486 | 1.486578774  | 5.55E-73    | 1 |
| SLC35E2   | 9906   | CGGCAGAGUUAAGGAGUA  | Plate 5 | D8  | 1380 | 102.79  | 244.71  | 0.743216144 | -0.602073786 | 0.7116879   | 0 |
| SLC35G5   | 83650  | GGAUGGUCUACAGGCGAG  | Plate 2 | E21 | 349  | 159.11  | 169.56  | 2.768231761 | 1.200492524  | 1.33E-54    | 1 |
| SLC35G5   | 83650  | CCAUAGACUGGUCACUUA  | Plate 2 | F21 | 478  | 184.42  | 112.20  | 2.534069761 | 1.072984033  | 9.88E-130   | 1 |
| SLC35G5   | 83650  | UCGUUAGUUAACGAGGUA  | Plate 2 | G21 | 716  | 349.82  | 375.29  | 1.432578378 | 0.250141863  | 6.39E-28    | 1 |
| SLC35G5   | 83650  | AAGGUUUCUUAACCGUAU  | Plate 2 | H21 | 613  | 112.66  | 121.22  | 2.152382194 | 0.837462068  | 6.59E-79    | 1 |
| SLC3A2    | 6520   | GAAAGGUCUGGUAAGUA   | Plate 1 | A22 | 96   | 173.38  | 217.35  | 1.501258821 | 0.394288516  | 7.25E-16    | 1 |
| SLC3A2    | 6520   | GAAAGGUCUGGUAAGUA   | Plate 1 | B22 | 377  | 129.55  | 281.96  | 0.701769921 | -0.702814188 | 1.22E-26    | 0 |
| SLC3A2    | 6520   | UCACGGGUCUGCAAGGA   | Plate 1 | C22 | 432  | 91.21   | 194.66  | 0.768196719 | -0.572336499 | 7.33E-39    | 0 |
| SLC3A2    | 6520   | GAGCAUCGUCUUAUCUG   | Plate 1 | D22 | 1196 | 173.17  | 234.26  | 1.138540723 | -0.004698313 | 2.44E-95    | 0 |
| SLC4A11   | 83959  | GAAAGUACCGAAGUUAUA  | Plate 4 | M6  | 865  | 254.96  | 218.94  | 2.048683096 | 0.826411468  | 1.95E-69    | 1 |
| SLC4A11   | 83959  | GGAUUCACUAGGCGAAU   | Plate 4 | N6  | 917  | 23.51   | 138.99  | 0.360719267 | -1.679336981 | 0.010696989 | 0 |
| SLC4A11   | 83959  | AAACAAGCUGGCGGCAAA  | Plate 4 | O6  | 161  | 71.01   | 226.17  | 0.713356914 | -0.695589381 | 0.00000218  | 0 |
| SLC4A11   | 83959  | CGAGAGUUCUUGCCGUAU  | Plate 4 | P6  | 809  | 63.19   | 236.82  | 0.72299016  | -0.676237451 | 0.004142716 | 0 |
| SLURP1    | 57152  | GCAGGACCAUACCCGUG   | Plate 1 | I11 | 505  | 222.42  | 125.06  | 3.050244875 | 1.41704086   | 6.64E-112   | 1 |
| SLURP1    | 57152  | GAAAGGUGGUCUGGUGAG  | Plate 1 | J11 | 576  | 255.36  | 226.10  | 1.579124805 | 0.467240991  | 1.57E-63    | 1 |
| SLURP1    | 57152  | GAUCUUCUGCUGUCCGA   | Plate 1 | K11 | 1172 | 76.51   | 217.39  | 0.849387535 | -0.427389365 | 7.11E-23    | 0 |
| SLURP1    | 57152  | GACACAGCCUGCAUACCA  | Plate 1 | L11 | 894  | 341.55  | 139.60  | 4.678647198 | 2.034207237  | 9.6E-166    | 1 |
| SNTB2     | 6645   | GAGUAGUCUGCUGGAUAU  | Plate 1 | I17 | 256  | 201.40  | 212.96  | 1.530041476 | 0.421686555  | 1.44E       |   |

|         |           |                      |         |     |      |         |         |             |              |             |   |
|---------|-----------|----------------------|---------|-----|------|---------|---------|-------------|--------------|-------------|---|
| SPTBN2  | 6712      | CGAGACAAUUCGAGAGU    | Plate 4 | O15 | 844  | 144.14  | 229.98  | 0.938286748 | -0.300184574 | 1.06E-13    | 0 |
| SPTBN2  | 6712      | GGAGAGCUUACUGCGCUA   | Plate 4 | P15 | 1491 | 131.26  | 123.86  | 3.014175117 | 1.383477869  | 8.98E-87    | 1 |
| SRMS    | 6725      | UCACUGACCGCCGCAAGA   | Plate 5 | A19 | 378  | 61.94   | 248.85  | 0.743851436 | -0.600841116 | 0.003198892 | 0 |
| SRMS    | 6725      | GCAGAGGCGCGGCUUUU    | Plate 5 | B19 | 329  | 212.86  | 255.46  | 1.879137471 | 0.736143082  | 3.22E-15    | 1 |
| SRMS    | 6725      | GCUCCAAGAUCCGCGCAA   | Plate 5 | C19 | 837  | 61.01   | 411.87  | 0.384246059 | -1.553825163 | 0.002517707 | 0 |
| SRMS    | 6725      | GAUCAAGGUCAUCAAUGCA  | Plate 5 | D19 | 859  | 134.61  | 252.29  | 0.868116167 | -0.377967517 | 1.23E-25    | 1 |
| SRSF1   | 6426      | GAAAGAAGAUAGCCUAU    | Plate 1 | A18 | 91   | 179.22  | 58.46   | 3.67888898  | 1.687385933  | 7.65E-24    | 1 |
| SRSF1   | 6426      | UAUCUUAUCCGACAGCAUC  | Plate 1 | B18 | 606  | 358.25  | 122.42  | 6.24765747  | 2.451431552  | 6.26E-160   | 1 |
| SRSF1   | 6426      | UGAAGCUGGUAUGUAUGU   | Plate 1 | C18 | 154  | 212.05  | 90.92   | 5.822988788 | 2.349875634  | 3.73E-44    | 1 |
| SRSF1   | 6426      | CGACGGCUAUGAUUACGAU  | Plate 1 | D18 | 569  | 67.47   | 76.59   | 1.477737757 | 0.371506601  | 5.5E-84     | 1 |
| SS18L2  | 51188     | GGAAACGAGGCGGCGAGUA  | Plate 2 | A7  | 17   | 571.83  | 122.26  | 5.366338982 | 2.155465981  | 0.00000336  | 1 |
| SS18L2  | 51188     | GGGCAAGCGGGAAGUCAAU  | Plate 2 | B7  | 826  | 36.83   | 437.45  | 0.17309121  | -2.798867838 | 2.52E-60    | 0 |
| SS18L2  | 51188     | CGUGUAUUGGCGGAGUCA   | Plate 2 | C7  | 79   | 297.46  | 249.05  | 2.221788941 | 0.883249565  | 6.31E-19    | 1 |
| SS18L2  | 51188     | GCAGAUCCGAGUCCACCA   | Plate 2 | D7  | 14   | 175.31  | 48.10   | 2.105939745 | 0.80599195   | 0.000202    | 1 |
| STK16   | 8576      | GAGGUACGCUUGGGAUGA   | Plate 3 | E3  | 1076 | 100.50  | 198.00  | 0.947124673 | -0.250268972 | 0.164831266 | 0 |
| STK16   | 8576      | CGACAUCAUCGCCUCUUC   | Plate 3 | F3  | 754  | 89.00   | 184.52  | 1.200485179 | 0.09172237   | 2.26E-47    | 1 |
| STK16   | 8576      | GGUACGCUUGGGAUGAGA   | Plate 3 | G3  | 1572 | 96.66   | 245.35  | 0.71034808  | -0.665297178 | 8.28E-10    | 0 |
| STK16   | 8576      | UGAAGCGAAUCCUGUGUCA  | Plate 3 | H3  | 1281 | 474.49  | 336.26  | 1.994558823 | 0.82417445   | 2.94E-170   | 1 |
| STK36   | 27148     | GGUAUACGUGCGGCAUCU   | Plate 3 | I13 | 456  | 165.15  | 144.74  | 1.946162507 | 0.78873696   | 4.88E-32    | 1 |
| STK36   | 27148     | CUAGAACCAUCGUCUCGUU  | Plate 3 | J13 | 310  | 118.08  | 369.55  | 0.64503021  | -0.804456585 | 0.001665131 | 0 |
| STK36   | 27148     | GAUCUUAAGCCUCAAUAUG  | Plate 3 | K13 | 325  | 62.47   | 401.86  | 0.477246872 | -1.239087576 | 0.001210022 | 0 |
| STK36   | 27148     | GUGUACAAGGGUUGAAGA   | Plate 3 | L13 | 306  | 106.78  | 207.92  | 1.443055634 | 0.357231699  | 1.72E-22    | 1 |
| SUMF1   | 285362    | GAGAAGGUGGUAUCUUC    | Plate 5 | I15 | 1072 | 86.32   | 199.30  | 1.310761841 | 0.216478047  | 7.52E-23    | 1 |
| SUMF1   | 285362    | GCGAGGAGUUAUCUAUUG   | Plate 5 | J15 | 958  | 23.83   | 433.75  | 0.08539984  | -3.723550353 | 1.15E-98    | 0 |
| SUMF1   | 285362    | GAUCUCGCGGGAGGUCAA   | Plate 5 | K15 | 736  | 59.52   | 348.76  | 0.32595427  | -1.791186052 | 0.001485451 | 0 |
| SUMF1   | 285362    | GGUCUUAUUGUUAUCAGGA  | Plate 5 | L15 | 322  | 95.57   | 395.28  | 0.474791429 | -1.248561736 | 0.026906158 | 0 |
| SUN5    | 140732    | GAGGUCGACGUCAGCUAUA  | Plate 4 | A18 | 31   | 453.52  | 281.41  | 4.517499043 | 1.967238928  | 0.00000269  | 1 |
| SUN5    | 140732    | GUGAAGAUUCUCAAAGCAUC | Plate 4 | B18 | 446  | 216.44  | 267.90  | 1.380034879 | 0.256419363  | 1.81E-46    | 1 |
| SUN5    | 140732    | CAACAAUGCAACGAGCUUA  | Plate 4 | C18 | 545  | 26.87   | 393.46  | 0.189586726 | -2.607355503 | 1.98E-25    | 0 |
| SUN5    | 140732    | GAUGAUACAGGAGAUUAUC  | Plate 4 | D18 | 779  | 161.42  | 297.68  | 1.361001948 | 0.236383764  | 2.46E-22    | 1 |
| SUOX    | 6821      | GGAGACGCUUGGGAUGUA   | Plate 5 | E11 | 316  | 116.86  | 514.27  | 0.599551045 | -0.911973038 | 0.077578969 | 0 |
| SUOX    | 6821      | GGAGUACAACACACAUUAUC | Plate 5 | F11 | 1004 | 167.70  | 296.08  | 1.011521427 | -0.157400651 | 0.000105168 | 0 |
| SUOX    | 6821      | GUGCAGUUGGCGUUAUCA   | Plate 5 | G11 | 177  | 332.76  | 262.57  | 1.837893621 | 0.704125733  | 8.37E-35    | 1 |
| SUOX    | 6821      | GGUUAUGGUAUCAAUGUG   | Plate 5 | H11 | 1079 | 63.07   | 145.63  | 0.964564434 | -0.225978012 | 1.34E-78    | 0 |
| SVIL    | 6840      | GGACUAGUGUAGGCAUA    | Plate 2 | A6  | 463  | 64.03   | 201.71  | 0.715404396 | -0.75164132  | 3.5E-20     | 0 |
| SVIL    | 6840      | GAUCUUGUUGUAGGAGUA   | Plate 2 | B6  | 877  | 148.29  | 535.89  | 0.432619501 | -1.477301604 | 9.26E-10    | 0 |
| SVIL    | 6840      | CCGAAAGAAUUGCAAGGUA  | Plate 2 | C6  | 1492 | 62.85   | 188.59  | 0.635258076 | -0.923057492 | 7.08E-32    | 0 |
| SVIL    | 6840      | GCCAAAGGAAUCAAUAUA   | Plate 2 | D6  | 396  | 206.53  | 348.18  | 1.09374714  | -0.139192965 | 1.63E-32    | 0 |
| SYCE1L  | 100130958 | GCGGAGGUGGAGAUUAU    | Plate 4 | E7  | 900  | 59.04   | 299.98  | 0.581805734 | -0.989675948 | 0.164602462 | 0 |
| SYCE1L  | 100130958 | GAUUAAGAUUUAUUAUUA   | Plate 4 | F7  | 1023 | 107.78  | 178.00  | 1.22592234  | 0.085582223  | 4.56E-85    | 1 |
| SYCE1L  | 100130958 | GCUCAGAGGUGGAGUUAUC  | Plate 4 | G7  | 361  | 141.61  | 83.50   | 2.030281711 | 0.813394554  | 8.11E-52    | 1 |
| SYCE1L  | 100130958 | GCGUAGGAGCCACAGUAUA  | Plate 4 | H7  | 1235 | 172.01  | 236.77  | 1.052708828 | -0.134179189 | 0.0000196   | 0 |
| SYCP2   | 10388     | GAGAAGGUGGUGUUAUUA   | Plate 4 | M19 | 823  | 233.39  | 186.44  | 2.021278064 | 0.806982437  | 1.91E-62    | 1 |
| SYCP2   | 10388     | GCGGAUAGGUCUAUUAUUA  | Plate 4 | N19 | 1439 | 132.01  | 252.36  | 0.775974011 | -0.574205128 | 0.36334354  | 0 |
| SYCP2   | 10388     | GAAGCAUUCUUAUUAUUA   | Plate 4 | O19 | 1541 | 135.45  | 190.90  | 1.208789467 | 0.065277627  | 1.8E-55     | 1 |
| SYCP2   | 10388     | CAGCAAGGCUAAAAUUAUA  | Plate 4 | P19 | 1277 | 112.91  | 382.85  | 0.479395305 | -1.268997683 | 5.95E-08    | 0 |
| SYDE1   | 85360     | GACAGGAGUUGGCGGUGU   | Plate 5 | E14 | 252  | 101.15  | 161.62  | 1.129886193 | 0.002249934  | 8.27E-32    | 1 |
| SYDE1   | 85360     | GAAGGCGUUGGGGAGUUC   | Plate 5 | F14 | 1378 | 69.16   | 347.38  | 0.407962104 | -1.46742048  | 2.21E-20    | 0 |
| SYDE1   | 85360     | CCUCAAGGAUUAUCUUCGA  | Plate 5 | G14 | 1566 | 130.00  | 155.71  | 1.608602579 | 0.511880406  | 6.94E-86    | 1 |
| SYDE1   | 85360     | GCACUUGAUAUCUAAAGAC  | Plate 5 | H14 | 1284 | 41.24   | 334.90  | 0.281361708 | -2.003429629 | 9.78E-08    | 0 |
| SYNPO   | 11346     | AGUCACGAGUUGGGAUAUA  | Plate 5 | E4  | 289  | 141.93  | 196.59  | 1.335767813 | 0.243741724  | 1.89E-34    | 1 |
| SYNPO   | 11346     | CAAGGAGGCUCCAAAGGUC  | Plate 5 | F4  | 992  | 59.80   | 292.11  | 0.327661603 | -1.783649008 | 0.188318638 | 0 |
| SYNPO   | 11346     | AUUCAGGAGCCAGGCGCAA  | Plate 5 | G4  | 10   | 33.97   | 51.03   | 0.625703222 | -0.850377093 | 0.011512889 | 0 |
| SYNPO   | 11346     | CCAGAGGAGUACGCUUAUA  | Plate 5 | H4  | 986  | 420.23  | 279.17  | 3.038784057 | 1.429566626  | 4.05E-121   | 1 |
| SYTL3   | 94120     | GACAGAGUUGGCGCAUAUU  | Plate 5 | M20 | 290  | 503.46  | 240.71  | 4.168281564 | 1.885525202  | 2.97E-60    | 1 |
| SYTL3   | 94120     | GUAAGAACCUUGCCUAUUG  | Plate 5 | N20 | 786  | 180.52  | 242.37  | 0.998703727 | -0.175798872 | 2.71E-20    | 0 |
| SYTL3   | 94120     | GAAAGCAGGCUUUCUCAGA  | Plate 5 | O20 | 997  | 81.17   | 248.20  | 0.640084374 | -0.817593538 | 6.73E-10    | 0 |
| SYTL3   | 94120     | GGUGGAAAGGAGCGAAGAA  | Plate 5 | P20 | 741  | 94.75   | 219.98  | 1.051218711 | -0.101864672 | 4.07E-13    | 0 |
| SYVN1   | 84447     | CAACAGGCGUUGUUAUUA   | Plate 5 | E21 | 593  | #DIV/0! | #DIV/0! | 1.443525973 | 0.355669534  | 6.04E-43    | 1 |
| SYVN1   | 84447     | UGUCUGGCGUUCACCCGUUU | Plate 5 | F21 | 203  | 59.39   | 217.87  | 0.788211683 | -0.517272943 | 6.36E-11    | 0 |
| SYVN1   | 84447     | GGAGAUUCGUGGAGGAGUA  | Plate 5 | G21 | 212  | 47.38   | 250.86  | 0.5427356   | -1.055606083 | 0.000164905 | 0 |
| SYVN1   | 84447     | CAAAGAGACUCCGCUCAUA  | Plate 5 | H21 | 8    | 19.00   | 129.66  | 0.639586405 | -0.818716355 | 0.03103723  | 0 |
| TANK    | 10010     | GGUAAGAUUCUGGAGUAUA  | Plate 4 | E4  | 598  | 258.87  | 206.13  | 4.405149821 | 1.930905719  | 1.45E-58    | 1 |
| TANK    | 10010     | CAACUCAUUAAGGCGUAUA  | Plate 4 | F4  | 1241 | 128.51  | 251.04  | 0.824501848 | -0.486690735 | 0.0000644   | 0 |
| TANK    | 10010     | CACAGACUUAUUAUGGACA  | Plate 4 | G4  | 1444 | 50.96   | 308.43  | 0.319557286 | -1.854138882 | 1.07E-21    | 0 |
| TANK    | 10010     | GAGCAGAGAUUCGUGAUA   | Plate 4 | H4  | 1651 | 133.37  | 215.81  | 1.164921814 | 0.011947761  | 2.02E-45    | 1 |
| TAS2R19 | 259294    | CGAACGUGUUAUUAUUCUG  | Plate 3 | I8  | 1121 | 130.06  | 160.36  | 1.942517949 | 0.786032707  | 8.58E-52    | 1 |
| TAS2R19 | 259294    | GGUUAAGAGUAAGAAUUG   | Plate 3 | J8  | 1165 | 118.21  | 395.38  | 0.490200752 | -1.200450619 | 0.00000162  | 0 |
| TAS2R19 | 259294    | UAACCAUGGAGUAGGAGUA  | Plate 3 | K8  | 763  | 191.67  | 197.16  | 1.274361179 | 0.177879001  | 2.42E-18    | 1 |
| TAS2R19 | 259294    | UGGUGUAACACAGGAAAGA  | Plate 3 | L8  | 1300 | 75.83   | 255.55  | 0.467675235 | -1.268316281 | 0.395815081 | 0 |
| TBC1D21 | 161514    | UCGACAGGCUUUAAGGUAU  | Plate 2 | I15 | 277  | 348.03  | 285.57  | 2.021055449 | 0.746636695  | 8.3E-36     | 1 |
| TBC1D21 | 161514    | GGACUGAAGCGUUGAAUAU  | Plate 2 | J15 | 129  | 157.45  | 174.49  | 1.570919795 | 0.383137315  | 4.84E-28    | 1 |
| TBC1D21 | 161514    | UAACUUAUGGAGUUAUUA   | Plate 2 | K15 | 1069 | 50.10   | 372.48  | 0.226964402 | -2.407934267 | 4.05E-09    | 0 |
| TBC1D21 | 161514    | CUACAAGGCGUUAUUGCAUA | Plate 2 | L15 | 539  | 85.90   | 420.77  | 0.413860675 | -1.541255134 | 0.81203278  | 0 |
| TBC1D4  | 9882      | GAGCAGGCUUUCUGGAGUA  | Plate 1 | I20 | 1522 | 80.54   | 291.53  | 0.499142161 | -1.194361532 | 8.25E-17    | 0 |
| TBC1D4  | 9882      | GUGGGAUAUAUCUGGUGUA  | Plate 1 | J20 | 1639 | 174.27  | 324.84  | 1.093459128 | -0.062984912 | 0.001506282 | 0 |
| TBC1D4  | 9882      | CAAUUCUUGUUAUCUGGAA  | Plate 1 | K20 | 1583 | 103.23  | 291.97  | 0.683367825 | -0.741149979 | 9.36E-31    | 0 |
| TBC1D4  | 9882      | GAGGAGAAUUAUGGAGUAU  | Plate 1 | L20 | 52   | 295.16  | 120.98  | 4.589617022 | 2.006489567  | 2.3E-16     | 1 |
| TBX2    | 6909      | UAACUCAUCGAGCAAGUAUA | Plate 4 | M21 | 459  | 209.37  | 144.56  | 3.533190046 | 1.612685985  | 2.65E-96    | 1 |
| TBX2    | 6909      | UCACACAGCUGAAGAUUCA  | Plate 4 | N21 | 1514 | 118.26  | 207.88  | 0.950700754 | -0.281222158 | 1.55E-17    | 0 |
| TBX2    | 6909      | CAUCUCGCGUCCUCAAAGA  | Plate 4 | O21 | 1263 | 204.03  | 456.28  | 0.734777963 | -0.652905103 | 0.444508501 | 0 |
| TBX2    | 6909      | CGUCAGCUGGCGGCUUAUA  | Plate 4 | P21 | 1467 | 173.91  | 144.73  | 2.349957041 | 1.024349016  | 8.11E-112   | 1 |
| TCTE1   | 202500    | ACAAGGCGUUGGGAUAUA   | Plate 4 | I21 | 304  | 37.82   | 178.96  | 0.773973856 | -0.577928628 | 4.77E-22    | 0 |
| TCTE1   | 202500    | CAACAGGCAAGCAUCAUAUA | Plate 4 | J21 | 199  | 90.60   | 43.11   | 3.114538621 | 1.430733095  | 3.41E-54    | 1 |
| TCTE1   | 202500    | CAACUUGGCGAUAUCUGGUA | Plate 4 | K21 | 820  | 306.37  | 270.76  | 1.675914199 | 0.536662922  | 4.16E-79    | 1 |
| TCTE1   | 202500    | CGAGGAUACCGUUAACGACA | Plate 4 | L21 | 926  | 216.32  | 244.21  | 1.738054582 | 0.589188022  | 2.43E-31    | 1 |
| TEAD1   | 7003      | CACAAGGCGUUAUUAUUAU  | Plate 2 | A3  | 436  | 388.56  | 296.99  | 4.015741628 | 1.737194241  | 8.1E-27     | 1 |
| TEAD1   | 7003      | GAAAGGUGGCUUUAAGGAA  | Plate 2 | B3  | 615  | 77.97   | 217.29  | 0.87815263  | -0.45592859  | 4.48E-17    | 0 |
| TEAD1   | 7003      | GAUUUUGUAUUAUCGAAUA  | Plate 2 | C3  | 1115 | 137.64  | 133.65  | 2.535437306 | 1.073762392  | 1.94E-79    | 1 |
| TEAD1   | 7003      | CCCAUUGGUGAUAUUAUUA  | Plate 2 | D3  | 1194 | 86.37   | 292.44  | 0.731148317 | -0.720236211 | 3.67E-08    | 0 |
| TIGD7   | 91151     | AGACGGAUCUUAUUAUUAUA | Plate 2 | M18 | 1582 | 138.59  | 304.04  | 0.69505204  | -0.793279303 | 1.86E-20    | 0 |
| TIGD7   | 91151     | GAUAGGUGGUGUUAUUAUUA | Plate 2 | N18 | 815  | 105.21  | 416.84  | 0.565610023 | -1.090592617 | 0.818       |   |

|          |        |                      |         |     |      |         |         |             |              |             |   |
|----------|--------|----------------------|---------|-----|------|---------|---------|-------------|--------------|-------------|---|
| TLE1     | 7088   | GCCAAAGAGAUUAUACGA   | Plate 3 | L6  | 1077 | 71.11   | 393.68  | 0.33294345  | -1.758546159 | 2.9E-50     | 0 |
| TMCO6    | 55374  | GCCUUUGGCCUCCACAA    | Plate 4 | I19 | 123  | 186.28  | 212.31  | 4.782640835 | 2.049522085  | 2.03E-19    | 1 |
| TMCO6    | 55374  | CAACAAGACUCCGACAGU   | Plate 4 | J19 | 698  | 50.61   | 133.88  | 0.731053369 | -0.660236732 | 1.79E-30    | 0 |
| TMCO6    | 55374  | UCUAAGCGUGGAGCGGUA   | Plate 4 | K19 | 975  | 78.99   | 306.63  | 0.429983121 | -1.425933434 | 0.366263292 | 0 |
| TMCO6    | 55374  | CGUGAAGCUCUCGGAUUA   | Plate 4 | L19 | 759  | 113.23  | 270.21  | 0.945328253 | -0.28939809  | 2.69E-12    | 0 |
| TMEM132A | 54972  | GAGUAGAGUUUGGACAUU   | Plate 4 | I15 | 327  | 65.78   | 348.90  | 0.407186669 | -1.504523133 | 0.0000167   | 0 |
| TMEM132A | 54972  | CAAGAACCCUCCGACAGU   | Plate 4 | J15 | 596  | 80.34   | 312.75  | 0.527995376 | -1.129688166 | 0.0000211   | 0 |
| TMEM132A | 54972  | GAGCUGGCCUACCGCUUG   | Plate 4 | K15 | 1272 | 69.14   | 175.93  | 0.718786445 | -0.684650259 | 0.00000617  | 0 |
| TMEM132A | 54972  | CUGAAGGCUUCGCAACUA   | Plate 4 | L15 | 667  | 37.46   | 248.76  | 0.406173055 | -1.508118927 | 0.030203056 | 0 |
| TMEM18   | 129787 | GAUGAACGCGAGAUUAUU   | Plate 2 | M6  | 1136 | 272.81  | 483.77  | 0.951180039 | -0.340681864 | 1.77E-08    | 0 |
| TMEM18   | 129787 | CAACUGGUCGAGAUCAUC   | Plate 2 | N6  | 1195 | 87.60   | 382.16  | 0.483584581 | -1.316632058 | 9.5E-26     | 0 |
| TMEM18   | 129787 | GGAUGUUAUUUCUAUUAU   | Plate 2 | O6  | 1630 | 111.60  | 260.99  | 0.862255526 | -0.482284835 | 0.08094693  | 0 |
| TMEM18   | 129787 | GUUUGAGGUGGUAUGGA    | Plate 2 | P6  | 1531 | 106.27  | 328.08  | 0.614325171 | -0.971397806 | 0.000452272 | 0 |
| TNPO1    | 3842   | GUUUGAGAGUAGCAGCUU   | Plate 1 | E20 | 1044 | 418.34  | 96.80   | 9.46611285  | 3.050887914  | 0           | 1 |
| TNPO1    | 3842   | GCAACUGGUCGAGUAGU    | Plate 1 | F20 | 1817 | 202.72  | 134.36  | 3.509112796 | 1.619222115  | 4.24E-20    | 0 |
| TNPO1    | 3842   | GCCUGGUCAGUAGGUAU    | Plate 1 | G20 | 1115 | 67.63   | 438.27  | 0.344875569 | -1.727736372 | 0.838738033 | 0 |
| TNPO1    | 3842   | CAAUUGGUCGUCUUGGUA   | Plate 1 | H20 | 1069 | 156.35  | 295.52  | 0.982860479 | -0.216825667 | 1.04E-11    | 0 |
| TOP1     | 7150   | GAAAGGAAUAGCUAUAUA   | Plate 4 | A22 | 1203 | 102.66  | 201.38  | 0.780860887 | -0.565147913 | 2.88E-12    | 0 |
| TOP1     | 7150   | GAAAGGUCGUCUUCAGAGA  | Plate 4 | B22 | 1197 | 70.66   | 269.85  | 0.491096704 | -1.234206323 | 0.529864088 | 0 |
| TOP1     | 7150   | GGAAGUAGCUAGCUUUUU   | Plate 4 | C22 | 606  | 187.86  | 172.17  | 1.611669681 | 0.480270719  | 6.65E-41    | 1 |
| TOP1     | 7150   | ACAAUAGGUCGUCGUAUU   | Plate 4 | D22 | 693  | 141.05  | 240.88  | 0.953098644 | -0.277587924 | 3.79E-08    | 0 |
| TP53     | 7157   | GAGGUUGGUCGUCAGUUA   | Plate 1 | M8  | 1265 | 184.15  | 297.13  | 0.835075594 | -0.451905501 | 1.19E-12    | 0 |
| TP53     | 7157   | GCAACAGGAAAGAAUUCU   | Plate 1 | N8  | 934  | 57.40   | 594.73  | 0.188935958 | -2.595915005 | 6.45E-47    | 0 |
| TP53     | 7157   | GAGAAACCAUGGUAUGGA   | Plate 1 | O8  | 635  | 64.26   | 439.51  | 0.304677319 | -1.906530196 | 0.05497922  | 0 |
| TP53     | 7157   | GUUUGAGGUAUGUCCGAGA  | Plate 1 | P8  | 1602 | 100.15  | 331.77  | 0.507101071 | -1.17153898  | 0.002305743 | 0 |
| TRAF7    | 84231  | GCACUGAGCUGAAGUUGAA  | Plate 2 | I5  | 296  | 111.46  | 313.06  | 1.219033214 | 0.017265225  | 1.81E-20    | 1 |
| TRAF7    | 84231  | GCAACUGGUCGAGUAGUUG  | Plate 2 | J5  | 33   | 79.87   | 396.32  | 0.593190585 | -1.021904605 | 0.04406997  | 0 |
| TRAF7    | 84231  | GCGGGAGCAGUCCAGUUA   | Plate 2 | K5  | 1099 | 320.91  | 120.06  | 6.548613644 | 2.442717308  | 1.47E-167   | 1 |
| TRAF7    | 84231  | AGACCAGCUCGAGGACUUG  | Plate 2 | L5  | 844  | 44.22   | 319.50  | 0.276248349 | -2.124434463 | 3.39E-12    | 0 |
| TRIM23   | 373    | GAAAGGUGGUCGUAACUA   | Plate 5 | I22 | 1240 | 15.02   | 352.48  | 0.100280013 | -3.491821535 | 1.23E-138   | 0 |
| TRIM23   | 373    | UCACAAGCAUUCAGUAUUG  | Plate 5 | J22 | 1233 | 47.80   | 354.58  | 0.270655189 | -2.059399581 | 0.030271323 | 0 |
| TRIM23   | 373    | GCAAAUGUUGUAACGGAUA  | Plate 5 | K22 | 1481 | 90.74   | 282.55  | 0.757872196 | -0.573901047 | 0.00000603  | 0 |
| TRIM23   | 373    | GGAAGGAGCAUUCGUAUU   | Plate 5 | L22 | 1291 | 72.60   | 211.17  | 0.666190223 | -0.759921446 | 0.000326252 | 0 |
| TRIM33   | 51592  | GGACAAACCAUUAUUAUA   | Plate 5 | M4  | 1244 | 243.48  | 391.63  | 1.066778837 | -0.080666423 | 4.9E-37     | 0 |
| TRIM33   | 51592  | GCAAGGAGCAGUUAUCUUU  | Plate 5 | N4  | 1297 | 171.93  | 470.98  | 0.600829233 | -0.908900619 | 0.049778795 | 0 |
| TRIM33   | 51592  | UGAAACAUUGUAGUAUUG   | Plate 5 | O4  | 1198 | 112.24  | 239.71  | 0.889291789 | -0.343198762 | 2.61E-28    | 0 |
| TRIM33   | 51592  | GUUAUUAUUGCAACUAUG   | Plate 5 | P4  | 937  | 109.64  | 425.53  | 0.518745821 | -1.120827818 | 1.83E-25    | 0 |
| TRIM43B  | 653192 | CCACAGUAGUAGGAGUAUA  | Plate 4 | M22 | 459  | 56.51   | 108.11  | 1.241990514 | 0.104368787  | 3.46E-37    | 1 |
| TRIM43B  | 653192 | CUAUUAGGAGGAGAAAGAA  | Plate 4 | N22 | 255  | 78.30   | 131.85  | 1.231708797 | 0.092375845  | 8.7E-32     | 1 |
| TRIM43B  | 653192 | GGAAGGAGCAGCAGGAGAA  | Plate 4 | O22 | 220  | 200.41  | 204.89  | 1.954015285 | 0.758156385  | 6.41E-39    | 1 |
| TRIM43B  | 653192 | GACCCAAUGGCAACAAUA   | Plate 4 | P22 | 658  | 164.61  | 257.94  | 1.647939352 | 0.512377782  | 1.9E-37     | 1 |
| TRIM49   | 57093  | GAAAGGCAACAAUUAUAUA  | Plate 6 | A4  | 1305 | 66.38   | 517.85  | 0.270303864 | -2.102770788 | 7.21E-61    | 0 |
| TRIM49   | 57093  | GGAAGGUAUUAUUGAAUUA  | Plate 6 | B4  | 506  | 154.16  | 379.44  | 0.822189232 | -0.497882447 | 2.03E-09    | 0 |
| TRIM49   | 57093  | GACGAAUUGGUCUUAUAUA  | Plate 6 | C4  | 490  | 22.03   | 391.66  | 0.210967163 | -2.460334466 | 2.21E-14    | 0 |
| TRIM49   | 57093  | GAAUCAGAAUGAGAAUAUA  | Plate 6 | D4  | 265  | 59.62   | 227.60  | 1.048600465 | -0.146959739 | 5.54E-13    | 0 |
| TRIM60   | 166655 | GAAAGGAAUUGGCAUUGU   | Plate 1 | A15 | 1343 | 118.59  | 373.05  | 0.590029126 | -0.953026129 | 0.043444295 | 0 |
| TRIM60   | 166655 | GAUUAUGGAGUUAUCUUU   | Plate 1 | B15 | 1522 | 106.41  | 464.20  | 0.38852375  | -1.555809509 | 6.48E-22    | 0 |
| TRIM60   | 166655 | GGUCUAUUCUUAUCUUU    | Plate 1 | C15 | 1221 | 119.46  | 364.71  | 0.602555915 | -0.922711778 | 0.003641508 | 0 |
| TRIM60   | 166655 | CAAAUUGGCGUAUUAUAUA  | Plate 1 | D15 | 1517 | 100.68  | 324.30  | 0.563061267 | -1.020520391 | 5.06E-10    | 0 |
| TRIM62   | 55223  | CUACAAGCUGAGUAGCAUG  | Plate 2 | A13 | 1019 | 188.14  | 343.93  | 1.047676657 | -0.201278681 | 9.33E-20    | 0 |
| TRIM62   | 55223  | GAUCAACACCGUCCUCAUC  | Plate 2 | B13 | 1329 | 92.21   | 195.89  | 0.764611515 | -0.655673376 | 2.38E-70    | 0 |
| TRIM62   | 55223  | UCGAGCAGCUCGACCAUUG  | Plate 2 | C13 | 1357 | 93.49   | 276.37  | 0.751628708 | -0.680380133 | 0.085037252 | 0 |
| TRIM62   | 55223  | GCCAAAGGCGUUCGUAUUG  | Plate 2 | D13 | 1475 | 90.25   | 255.62  | 0.688234707 | -0.807499656 | 0.00000125  | 0 |
| TRPV4    | 59341  | GCACACCGCCGUCUCCUUA  | Plate 2 | E10 | 837  | 208.73  | 165.76  | 2.39749657  | 0.993056542  | 1.97E-94    | 1 |
| TRPV4    | 59341  | GCAACAAUUGGUCGUAUUA  | Plate 2 | F10 | 38   | 336.08  | 225.49  | 2.762312451 | 1.197404307  | 2.74E-09    | 1 |
| TRPV4    | 59341  | CAACCGCCUUAUCUUCUUU  | Plate 2 | G10 | 171  | 183.95  | 166.60  | 2.353205496 | 0.966155102  | 7.85E-41    | 1 |
| TRPV4    | 59341  | GAAACCGGUGGUCGUAUUA  | Plate 2 | H10 | 752  | 170.50  | 274.27  | 1.521541729 | 0.337061692  | 4.93E-12    | 1 |
| TSPAN16  | 26526  | GAAUACCAUCUCCGUAUUA  | Plate 4 | M12 | 913  | 179.90  | 247.45  | 1.373104393 | 0.249155946  | 1.37E-62    | 1 |
| TSPAN16  | 26526  | GGGCCUAGCUCGACGAUUGU | Plate 4 | N12 | 1068 | 86.29   | 217.98  | 0.709698548 | -0.703007107 | 4.86E-13    | 0 |
| TSPAN16  | 26526  | GGUAGGAGGAGCAGUAUAUA | Plate 4 | O12 | 1615 | 111.41  | 233.59  | 0.982268954 | -0.234095361 | 2.78E-23    | 0 |
| TSPAN16  | 26526  | CCCAAGGAGUUCGUAUAUA  | Plate 4 | P12 | 1553 | 67.67   | 495.67  | 0.252632301 | -2.19317435  | 4.93E-13    | 0 |
| TTC12    | 54970  | GAAAGGAGCAGUUCGCUUA  | Plate 3 | A20 | 717  | 190.79  | 213.07  | 1.77577964  | 0.656557344  | 0.67420881  | 0 |
| TTC12    | 54970  | UCUAGAGGUGUUAUAUAUA  | Plate 3 | B20 | 1583 | 87.49   | 246.72  | 0.725933059 | -0.63396798  | 0.01244965  | 0 |
| TTC12    | 54970  | CAUUGAUUUAUUAUAUAUA  | Plate 3 | C20 | 708  | #DIV/0! | #DIV/0! | 0.43195929  | -1.382927964 | 0.009273401 | 0 |
| TTC12    | 54970  | GAGGUUAUCUACACACUCC  | Plate 3 | D20 | 1611 | 55.18   | 149.18  | 0.778301373 | -0.533494415 | 8.56E-18    | 0 |
| TYW1     | 55253  | GCAUACACUGACGGCCUA   | Plate 5 | M16 | 1097 | 59.47   | 193.01  | 0.496769998 | -1.18327758  | 7.11E-26    | 0 |
| TYW1     | 55253  | GAGGACUAGUUAUAUCUCC  | Plate 5 | N16 | 1345 | 75.69   | 414.76  | 0.349440307 | -1.690809596 | 2.62E-35    | 0 |
| TYW1     | 55253  | GGUAGGAGUUAUUGGUAU   | Plate 5 | O16 | 1006 | 291.35  | 224.71  | 2.01037213  | 0.833535045  | 2.66E-140   | 1 |
| TYW1     | 55253  | GAAUAGCGGUAAGGACUAG  | Plate 5 | P16 | 1119 | 76.31   | 287.07  | 0.430229793 | -1.390748192 | 0.00000203  | 0 |
| UBE2M    | 9040   | GAUGAGGGUUCUACAAGA   | Plate 5 | A15 | 1093 | 343.33  | 271.67  | 1.970071308 | 0.804320318  | 6.23E-94    | 1 |
| UBE2M    | 9040   | GAGCCAGUCCUUAACGAUA  | Plate 5 | B15 | 1023 | 269.07  | 203.71  | 1.914985604 | 0.763406015  | 3.23E-125   | 1 |
| UBE2M    | 9040   | CAGACGACUCCUACAUCU   | Plate 5 | C15 | 9    | #DIV/0! | #DIV/0! | 0.50020891  | -1.17332487  | 0.171396208 | 0 |
| UBE2M    | 9040   | GAGGUAACCCUUGCCAAAGA | Plate 5 | D15 | 115  | 71.12   | 179.65  | 1.209662647 | 0.1006723    | 1.51E-17    | 0 |
| UBE2V2   | 7336   | GCUAAGAGCUGUAUAUAUA  | Plate 4 | A4  | 1338 | 143.58  | 271.23  | 0.878344058 | -0.39542729  | 4.54E-10    | 0 |
| UBE2V2   | 7336   | GACAGGCAUGUAUAUUGG   | Plate 4 | B4  | 419  | 339.09  | 209.66  | 3.744690252 | 1.696561021  | 1.84E-42    | 1 |
| UBE2V2   | 7336   | GAGUUAAGUUCUCCGUAUA  | Plate 4 | C4  | 1001 | 271.82  | 267.39  | 2.247973054 | 0.960339375  | 5.27E-16    | 1 |
| UBE2V2   | 7336   | GCAUCAGGUGUUAAGCAAA  | Plate 4 | D4  | 122  | 194.91  | 114.44  | 2.866805635 | 1.311158728  | 1.78E-32    | 1 |
| UBL3     | 5412   | GAGAUUAUUGUUGUUAUA   | Plate 2 | I9  | 1589 | 230.95  | 239.67  | 2.115355735 | 0.81242809   | 1.94E-80    | 1 |
| UBL3     | 5412   | CCAAUAUUGGUCGACUUA   | Plate 2 | J9  | 1813 | 221.30  | 146.51  | 2.922823609 | 1.278890557  | 5.84E-167   | 1 |
| UBL3     | 5412   | GCGGGGAUUAUUAUUAUA   | Plate 2 | K9  | 1154 | 149.22  | 498.90  | 0.513840713 | -1.229079099 | 0.00009603  | 0 |
| UBL3     | 5412   | CUUUCGUCUUCGACAAUA   | Plate 2 | L9  | 446  | 117.16  | 474.18  | 0.528807999 | -1.187656304 | 0.00000103  | 0 |
| UGT2B4   | 7363   | GCCUACUACUUCUUAUAUA  | Plate 2 | A5  | 863  | 122.23  | 437.64  | 0.644289807 | -0.902690533 | 0.000309703 | 0 |
| UGT2B4   | 7363   | UAAGAGGUGGCAACAUUCU  | Plate 2 | B5  | 194  | 90.81   | 149.94  | 2.128179815 | 0.821147844  | 6.49E-46    | 1 |
| UGT2B4   | 7363   | GUACAAGAAUUAUUAUUAUA | Plate 2 | C5  | 1442 | 142.43  | 232.34  | 1.118576794 | -0.106807903 | 1.17E-38    | 0 |
| UGT2B4   | 7363   | GGAAGAACCAUUAUUAUAUA | Plate 2 | D5  | 1250 | 96.79   | 359.97  | 0.751035756 | -0.68151871  | 0.147731342 | 0 |
| UHRF1    | 29128  | GCAUACCCUUCUUCGACUA  | Plate 6 | A5  | 1280 | 203.33  | 261.05  | 1.34658316  | 0.213878497  | 9.75E-11    | 1 |
| UHRF1    | 29128  | GGAACAGCUCUUGGUAUCAG | Plate 6 | B5  | 724  | 52.58   | 299.19  | 0.65432271  | -0.827350582 | 0.115090116 | 0 |
| UHRF1    | 29128  | UGGAGGAGGAGCUCUAUUA  | Plate 6 | C5  | 103  | 117.79  | 114.98  | 1.801320614 | 0.633630156  | 1.53E-26    | 1 |
| UHRF1    | 29128  | GAAACGCGGUGGCAACGAUG | Plate 6 | D5  | 165  | 219.78  | 212.05  | 1.760237824 | 0.600345532  | 4.35E-17    | 1 |
| UNC13D   | 201294 | GCAAGAUUCUCCACAAUA   | Plate 1 | M12 | 924  | 120.00  | 371.67  | 0.635882713 | -0.845051614 | 0.011079437 | 0 |
| UNC13D   | 201294 | CCAAUAUUGGUCGAGUUGU  | Plate 1 | N12 | 735  | 36.85   | 363.50  | 0.209749554 | -2.445144556 | 1.35E-19    | 0 |
| UNC13D   | 201294 | GGGUUCGCGAGGAUCUUUA  | Plate 1 | O12 | 1423 | 177.40  | 263     |             |              |             |   |

|         |        |                      |         |     |      |         |         |             |              |             |   |   |
|---------|--------|----------------------|---------|-----|------|---------|---------|-------------|--------------|-------------|---|---|
| WDR33   | 55339  | GCACAUAAAGGAGCGGAUUA | Plate 5 | E3  | 890  | 162.34  | 75.36   | 3.289123922 | 1.543775833  | 1.04E-216   | 1 | 3 |
| WDR33   | 55339  | UAAAGUAAAGUUGUCUUGUA | Plate 5 | F3  | 746  | 334.54  | 188.29  | 4.044902998 | 1.842177573  | 1.52E-171   | 1 | 1 |
| WDR33   | 55339  | AAAUUJUGGACUGCGAACA  | Plate 5 | G3  | 1175 | 94.47   | 96.80   | 1.931100453 | 0.775495681  | 1.43E-168   | 1 | 1 |
| WDR33   | 55339  | AGAGAGAUUAGCGGGCAUA  | Plate 5 | H3  | 773  | 46.11   | 166.53  | 0.615216204 | -0.874762125 | 2.67E-21    | 0 | 0 |
| WDR4    | 10785  | GGACGUGGCUUUCGAGGAG  | Plate 6 | A6  | 390  | 134.76  | 258.62  | 0.94211081  | -0.301456168 | 7.8E-18     | 0 | 0 |
| WDR4    | 10785  | GAGCACCUGUUUUAAGAA   | Plate 6 | B6  | 962  | 49.52   | 365.08  | 0.413193531 | -1.490535258 | 0.00000411  | 0 | 0 |
| WDR4    | 10785  | AGGUCUUGGUGGCGGACAA  | Plate 6 | C6  | 349  | 104.04  | 142.81  | 1.178654237 | 0.021715729  | 1.75E-24    | 1 | 1 |
| WDR4    | 10785  | GACGAGAAGAUCCGAGUCA  | Plate 6 | D6  | 1126 | 73.14   | 350.34  | 0.523062134 | -1.150370591 | 1.42E-25    | 0 | 0 |
| XKR7    | 343702 | GAGCAGACUUCUGCAUUGU  | Plate 4 | E3  | 478  | 193.73  | 114.31  | 3.787833599 | 1.713087586  | 3.89E-99    | 1 | 3 |
| XKR7    | 343702 | GCUUUGCGGUGGCAUUAU   | Plate 4 | F3  | 206  | 210.50  | 175.38  | 1.714679349 | 0.569653445  | 3.93E-31    | 1 | 1 |
| XKR7    | 343702 | UCGUGUACUUCGCGUUA    | Plate 4 | G3  | 1214 | 186.38  | 172.90  | 1.973963516 | 0.772809958  | 1.32E-134   | 1 | 1 |
| XKR7    | 343702 | UCCAGAGCAUAGCGAACA   | Plate 4 | H3  | 1190 | 92.16   | 369.33  | 0.472426989 | -1.290122075 | 0.000487293 | 0 | 0 |
| XKRX    | 402415 | GACAGGACUUCUGCAUUA   | Plate 4 | A21 | 720  | 70.02   | 173.87  | 0.999312812 | -0.209277111 | 5.84E-31    | 0 | 1 |
| XKRX    | 402415 | UAGACUACCUCUUAUGUGU  | Plate 4 | B21 | 1412 | 220.70  | 166.74  | 2.432836804 | 1.074354179  | 3.87E-112   | 1 | 1 |
| XKRX    | 402415 | CGACAAUGGACAGAUUA    | Plate 4 | C21 | 1510 | 107.72  | 177.23  | 1.091950886 | -0.081377399 | 1.66E-59    | 0 | 0 |
| XKRX    | 402415 | GCAAUUGUUGGCUUUAUCA  | Plate 4 | D21 | 992  | 117.71  | 253.16  | 0.774903184 | -0.576197391 | 0.079456105 | 0 | 0 |
| XKRY    | 9082   | GAGCUUACACUUCUUAUUA  | Plate 1 | I19 | 1336 | 89.90   | 330.33  | 0.476597159 | -1.261041951 | 0.007908398 | 0 | 0 |
| XKRY    | 9082   | CGACUUCUGCGCAUUAAG   | Plate 1 | J19 | 1144 | 47.27   | 446.32  | 0.213474913 | -2.419745762 | 7.75E-12    | 0 | 0 |
| XKRY    | 9082   | UGGCUUUCGUGGUGUUA    | Plate 1 | K19 | 1093 | 72.27   | 336.31  | 0.361921934 | -1.658133757 | 0.253272736 | 0 | 0 |
| XKRY    | 9082   | GGUAGUAUGGAGUCUUAU   | Plate 1 | L19 | 942  | 130.20  | 392.46  | 0.621757054 | -0.877461331 | 1.24E-08    | 0 | 0 |
| XKRY2   | 353515 | GAGCUUACACUUCUUAUUA  | Plate 2 | I8  | 1331 | 72.22   | 360.29  | 0.317464088 | -1.923806902 | 2.16E-16    | 0 | 0 |
| XKRY2   | 353515 | CGACUUCUGCGCAUUAAG   | Plate 2 | J8  | 1029 | 48.29   | 467.00  | 0.216387799 | -2.476781148 | 5.66E-39    | 0 | 0 |
| XKRY2   | 353515 | UGGCUUUCGUGGUGUUA    | Plate 2 | K8  | 1025 | 88.09   | 310.81  | 0.476235711 | -1.338724376 | 0.009383731 | 0 | 0 |
| XKRY2   | 353515 | GGUAGUAUGGAGUCUUAU   | Plate 2 | L8  | 418  | 128.77  | 329.00  | 1.120814987 | -0.103924057 | 1.36E-18    | 0 | 0 |
| YIF1B   | 90522  | GAAAGGACUUCUGCAUUA   | Plate 3 | M10 | 130  | 53.99   | 171.81  | 0.721002674 | -0.643818708 | 1.75E-09    | 0 | 0 |
| YIF1B   | 90522  | UCACCAAGCUCAGUAUUA   | Plate 3 | N10 | 1443 | 122.91  | 260.31  | 1.021753942 | -0.140847413 | 0.000003003 | 0 | 0 |
| YIF1B   | 90522  | GACCAUCGACCGCUUAUC   | Plate 3 | O10 | 73   | 115.97  | 256.55  | 0.876926334 | -0.361367662 | 0.0000268   | 0 | 0 |
| YIF1B   | 90522  | ACAAUUGUUGCGGUAUGA   | Plate 3 | P10 | 564  | 46.78   | 442.94  | 0.283019398 | -1.992923278 | 1.21E-08    | 0 | 0 |
| ZBTB43  | 23099  | GACAAAGCUGUUGGAGUGGA | Plate 1 | A5  | 1545 | 156.04  | 293.87  | 1.067438039 | -0.097731878 | 5.87E-19    | 0 | 2 |
| ZBTB43  | 23099  | GAACUGAGAGUUGUGGAAA  | Plate 1 | B5  | 568  | 176.86  | 357.26  | 0.691499022 | -0.724058091 | 0.000226482 | 0 | 0 |
| ZBTB43  | 23099  | CAUGGACUUCUUGGUACUA  | Plate 1 | C5  | 737  | 246.09  | 334.15  | 2.05684874  | 0.848551495  | 1.51E-61    | 1 | 1 |
| ZBTB43  | 23099  | GCGCCAGCAAGGACAAUUA  | Plate 1 | D5  | 571  | 441.88  | 178.68  | 6.440812726 | 2.495358538  | 3.33E-134   | 1 | 1 |
| ZBTB8OS | 339487 | GAAAGCUGUUGGAGUUAU   | Plate 5 | I7  | 223  | 207.91  | 147.04  | 3.691437287 | 1.710255117  | 2.15E-39    | 1 | 4 |
| ZBTB8OS | 339487 | CAGCAGUUGCAGUUAUCA   | Plate 5 | J7  | 682  | 146.86  | 281.05  | 1.475623274 | 0.387396917  | 1.59E-30    | 1 | 1 |
| ZBTB8OS | 339487 | GGCGGAGUUGGAGUUCUUA  | Plate 5 | K7  | 159  | 547.12  | 159.40  | 5.413802501 | 2.262714726  | 1.59E-61    | 1 | 1 |
| ZBTB8OS | 339487 | UAUUGAAGAAAGCCCGGAA  | Plate 5 | L7  | 211  | 207.65  | 275.59  | 1.507065961 | 0.41781503   | 8.28E-18    | 1 | 1 |
| ZDHH9   | 51114  | GACAAAGCUGUUGGAGUUA  | Plate 4 | M8  | 970  | 30.43   | 346.90  | 0.239559385 | -2.269830126 | 5.76E-77    | 0 | 3 |
| ZDHH9   | 51114  | GGAAUGCAGCUCUUGGAGUA | Plate 4 | N8  | 506  | 291.98  | 98.73   | 5.401575124 | 2.225094798  | 6.34E-122   | 1 | 1 |
| ZDHH9   | 51114  | GGACUUCGUGGAGUUAUUA  | Plate 4 | O8  | 1294 | 154.32  | 207.02  | 1.354834577 | 0.229831344  | 2.01E-40    | 1 | 1 |
| ZDHH9   | 51114  | GGAAAGUUGCUGGAGUUA   | Plate 4 | P8  | 326  | 290.65  | 182.72  | 3.07014635  | 1.410022061  | 2.61E-38    | 1 | 1 |
| ZFP3    | 124961 | GAAAGCUGUUGGAGUUAU   | Plate 1 | E10 | 846  | 201.37  | 201.77  | 2.436392529 | 1.092862379  | 4.29E-92    | 1 | 2 |
| ZFP3    | 124961 | CAGGUGUUGGAGUUAUUA   | Plate 1 | F10 | 1296 | 193.27  | 304.94  | 1.151419223 | 0.011528997  | 2.68E-41    | 1 | 1 |
| ZFP3    | 124961 | AGGUGUUGGAGUUAUUA    | Plate 1 | G10 | 1345 | 174.30  | 343.02  | 0.718618005 | -0.668587129 | 0.029031724 | 0 | 0 |
| ZFP3    | 124961 | ACUCAGAGUUAUUAUGACA  | Plate 1 | H10 | 1358 | 75.06   | 319.19  | 0.50259441  | -1.184417676 | 0.143339695 | 0 | 0 |
| ZNF181  | 339318 | GAGUAGGAGUUGGAGUUAU  | Plate 5 | I3  | 132  | 174.58  | 262.86  | 2.259372549 | 1.001994645  | 1.08E-12    | 1 | 2 |
| ZNF181  | 339318 | CAGACAGUUGUUAUUAUUA  | Plate 5 | J3  | 486  | 227.46  | 318.20  | 1.119972959 | -0.010463632 | 9.15E-26    | 0 | 0 |
| ZNF181  | 339318 | GGACUUCUUCUUGGAGUUA  | Plate 5 | K3  | 21   | 114.15  | 118.29  | 1.911075025 | 0.760456885  | 0.00000112  | 1 | 1 |
| ZNF181  | 339318 | AGUCGUGUUGGAGUUAUUA  | Plate 5 | L3  | 1151 | 63.63   | 205.05  | 0.526415627 | -1.09965331  | 0.00000189  | 0 | 0 |
| ZNF324  | 25799  | GACAGGAGUUGGAGUUAU   | Plate 3 | A21 | 29   | 127.56  | 109.85  | 1.374866148 | 0.287395949  | 0.00000344  | 1 | 4 |
| ZNF324  | 25799  | CUAGACAUCUUGGAGUUAU  | Plate 3 | B21 | 1437 | 173.51  | 172.87  | 2.014618829 | 0.838610249  | 1.15E-51    | 1 | 1 |
| ZNF324  | 25799  | GCCACGAGUUGGAGUUAU   | Plate 3 | C21 | 7    | #DIV/0! | #DIV/0! | 3.707660468 | 1.718613912  | 0.001576954 | 1 | 1 |
| ZNF324  | 25799  | CGACUAGCUCUUGGAGUUA  | Plate 3 | D21 | 661  | 330.70  | 56.16   | 10.30911698 | 3.193953638  | 1.76E-207   | 1 | 1 |
| ZNF367  | 195828 | GACAAAGCUGUUGGAGUUA  | Plate 2 | E12 | 918  | 181.75  | 168.59  | 1.843954435 | 0.614330798  | 3.84E-56    | 1 | 2 |
| ZNF367  | 195828 | GCACACAAGCUGGAGUUAU  | Plate 2 | F12 | 289  | 474.12  | 243.00  | 3.614974756 | 1.585513364  | 4.48E-70    | 1 | 1 |
| ZNF367  | 195828 | GAUACUUCUUGGAGUUAU   | Plate 2 | G12 | 773  | 204.70  | 497.49  | 0.717783364 | -0.746851818 | 0.010435679 | 0 | 0 |
| ZNF367  | 195828 | CGAGUUAUUAUUAUUAUUA  | Plate 2 | H12 | 1075 | 103.13  | 215.88  | 1.023858424 | -0.234455971 | 6.54E-11    | 0 | 0 |
| ZNF385B | 151126 | CGGAAAGCUGUUGGAGUUA  | Plate 4 | E18 | 515  | 112.34  | 139.37  | 1.022540892 | -0.176126829 | 2E-41       | 0 | 0 |
| ZNF385B | 151126 | CGGUUCUUGUUGGAGUUAU  | Plate 4 | F18 | 921  | 37.00   | 360.74  | 0.186080235 | -2.634288635 | 6.07E-62    | 0 | 0 |
| ZNF385B | 151126 | CAGCAUUCUUGGAGUUAU   | Plate 4 | G18 | 817  | 55.60   | 264.51  | 0.328191989 | -1.815673438 | 0.0000498   | 0 | 0 |
| ZNF385B | 151126 | AGCACUAGCAGCAACGAA   | Plate 4 | H18 | 1381 | 83.27   | 199.86  | 0.831080389 | -0.475225429 | 2.49E-13    | 0 | 0 |
| ZNF41   | 7592   | GGACAAAGCUCUUGGAGUUA | Plate 3 | I15 | 56   | 97.38   | 138.25  | 1.991864133 | 0.822224022  | 8.33E-12    | 1 | 1 |
| ZNF41   | 7592   | GAUCAGACUUCUUGGAGUUA | Plate 3 | J15 | 799  | 65.58   | 221.34  | 0.51815771  | -1.120432044 | 0.00000209  | 0 | 0 |
| ZNF41   | 7592   | GAGUUAUUAUUAUUAUUA   | Plate 3 | K15 | 702  | 83.15   | 279.10  | 0.494554104 | -1.187694956 | 0.002687412 | 0 | 0 |
| ZNF41   | 7592   | CAGAAAGCCACUUAUUAUUA | Plate 3 | L15 | 294  | 48.40   | 106.55  | 0.748785083 | -0.589271621 | 2.62E-32    | 0 | 0 |
| ZNF48   | 197407 | GAAAGAGUUGGAGUUAUUA  | Plate 5 | I14 | 714  | 36.34   | 286.40  | 0.497807589 | -1.180267403 | 0.33651123  | 0 | 1 |
| ZNF48   | 197407 | GAAAGAGUUGGAGUUAUUA  | Plate 5 | J14 | 61   | 155.04  | 302.29  | 1.205141416 | 0.095274916  | 0.00000237  | 1 | 1 |
| ZNF48   | 197407 | GAAAGAGUUGGAGUUAUUA  | Plate 5 | K14 | 1176 | 92.61   | 152.50  | 1.096810683 | -0.040613004 | 1.04E-67    | 0 | 0 |
| ZNF48   | 197407 | UCUCAACCUUGGAGUUAUUA | Plate 5 | L14 | 562  | 96.61   | 161.51  | 0.983197903 | -0.198373788 | 9.69E-40    | 1 | 1 |
| ZNF596  | 169270 | GCAAUUCAGUUGGAGUUAU  | Plate 2 | I17 | 334  | 135.93  | 314.52  | 1.3513094   | 0.165885827  | 2.94E-15    | 1 | 1 |
| ZNF596  | 169270 | GAUUUUGCUCUUAUUAUUA  | Plate 2 | J17 | 1109 | 55.81   | 369.96  | 0.2860949   | -2.073906526 | 2.18E-18    | 0 | 0 |
| ZNF596  | 169270 | GAAACACUUCUUGGAGUUA  | Plate 2 | K17 | 1063 | 178.36  | 325.96  | 0.883162614 | -0.447721202 | 1.17E-12    | 0 | 0 |
| ZNF596  | 169270 | GACUCACACUAGGAGUUAU  | Plate 2 | L17 | 1095 | 126.49  | 329.72  | 0.574822843 | -1.067282909 | 0.687450751 | 0 | 0 |
| ZNF615  | 284370 | CAGAGAGCUCUUGGAGUUA  | Plate 5 | M19 | 1003 | 30.19   | 396.35  | 0.170472917 | -2.726313073 | 4.15E-88    | 0 | 0 |
| ZNF615  | 284370 | GCAAAGUUCGCGUUAUUAU  | Plate 5 | N19 | 1420 | 128.82  | 207.55  | 0.976902114 | -0.207641615 | 1.09E-31    | 0 | 0 |
| ZNF615  | 284370 | GAAAGUUGGAGUUAUUAU   | Plate 5 | O19 | 1495 | 87.62   | 224.20  | 0.675377334 | -0.740161865 | 5.72E-15    | 0 | 0 |
| ZNF615  | 284370 | GCAAAGCUCUUAUUAUUAU  | Plate 5 | P19 | 516  | 88.10   | 263.32  | 0.69990183  | -0.688703046 | 1.68E-20    | 0 | 0 |
| ZNF674  | 641339 | AAAUUAUUAUUAUUAUUAU  | Plate 3 | A22 | 551  | 67.67   | 299.90  | 0.508901411 | -1.146437126 | 0.181119052 | 0 | 1 |
| ZNF674  | 641339 | UAACAACCAUUGGAGUUAU  | Plate 3 | B22 | 1570 | 101.98  | 264.17  | 0.701119467 | -0.684163025 | 0.308512659 | 1 | 1 |
| ZNF674  | 641339 | ACACUUAUUAUUAUUAUUA  | Plate 3 | C22 | 199  | #DIV/0! | #DIV/0! | 1.285324068 | 0.190236929  | 3.14E-48    | 1 | 1 |
| ZNF674  | 641339 | CUUGAGAGUUGGAGUUAUUA | Plate 3 | D22 | 945  | 100.12  | 282.97  | 0.900925388 | -0.322415686 | 3.27E-08    | 1 | 1 |
| ZNF678  | 339500 | GCAAAGCUCUUAUUAUUAU  | Plate 5 | A11 | 69   | 314.14  | 266.59  | 1.564493438 | 0.471768075  | 4.63E-13    | 0 | 3 |
| ZNF678  | 339500 | GCAAAGCUCUUAUUAUUAU  | Plate 5 | B11 | 1212 | 93.00   | 302.94  | 0.553220774 | -1.028000296 | 0.905649698 | 0 | 0 |
| ZNF678  | 339500 | GAGGCUUUCUUAUUAUUAU  | Plate 5 | C11 | 1460 | 273.34  | 252.90  | 2.224385939 | 0.97947959   | 2.76E-48    | 1 | 1 |
| ZNF678  | 339500 | GGUCACAACUUAUUAUUAU  | Plate 5 | D11 | 77   | 346.21  | 213.48  | 4.220147245 | 1.903365805  | 5.54E-17    | 1 | 1 |
| ZNF709  | 163051 | GAAAGGAGUUGGAGUUAU   | Plate 3 | M8  | 118  | 176.60  | 213.04  | 1.349021617 | 0.260018245  | 3.22E-20    | 1 | 2 |
| ZNF709  | 163051 | GAAAGGAGUUGGAGUUAU   | Plate 3 | N8  | 148  | 489.35  | 115.09  | 5.789858686 | 2.361632915  | 3.83E-60    | 1 | 1 |
| ZNF709  | 163051 | AGAUUCAGUUCUUGGAGUUA | Plate 3 | O8  | 675  | 40.72   | 449.61  | 0.266639037 | -2.078935306 | 1.88E-40    | 0 | 0 |
