# Supplementary material
Source: PubMed Central journal article supplement (PMC4651756)
Supplement: NIHMS729683-supplement-8.pdf [file NIHMS729683-supplement-8.pdf]

**Supplemental Table 4.** Results of the RRS validation screen to eliminate off-target effects.

**4 of 4 siRNAs validated**

| Gene Symbol | GENEID |
|-------------|--------|
| BEND3       | 57673  |
| CHEK1       | 1111   |
| CLSPN       | 63967  |
| CPSF2       | 53981  |
| ERH         | 2079   |
| GLRX3       | 10539  |
| ISCU        | 23479  |
| PAMR1       | 25891  |
| PAQR7       | 164091 |
| PCNA        | 5111   |
| POLD1       | 5424   |
| RAD17       | 5884   |
| RAD9A       | 5883   |
| RBX1        | 9978   |
| RNF208      | 727800 |
| RPA1        | 6117   |
| RPA2        | 6118   |
| SKA1        | 220134 |
| SLC30A8     | 169026 |
| SLC35G5     | 83650  |
| SPINK8      | 646424 |
| SRSF1       | 6426   |
| TIMELESS    | 8914   |
| TRIM43B     | 653192 |
| TRPV4       | 59341  |
| VPS8        | 23355  |
| ZBTB8OS     | 339487 |
| ZNF324      | 25799  |

**3 of 4 siRNAs validated**

| Gene Symbol | GENEID |
|-------------|--------|
| ABCC5       | 10057  |
| AKR1C1      | 1645   |
| ALPP        | 250    |
| ANKMY2      | 57037  |
| ARID1B      | 57492  |
| C14orf80    | 283643 |
| C16orf73    | 254528 |
| C2orf69     | 205327 |
| CACNG6      | 59285  |
| CATSPER1    | 117144 |
| CDH26       | 60437  |
| CEP19       | 84984  |
| DNAJB13     | 374407 |
| EFEMP2      | 30008  |
| ENPP7       | 339221 |
| EXOSC4      | 54512  |
| FAHD2B      | 151313 |
| FAM27L      | 284123 |
| FDFT1       | 2222   |
| FXN         | 2395   |
| FZD4        | 8322   |
| GLI3        | 2737   |
| GPC3        | 2719   |
| HNRNPC      | 3183   |
| HSPA6       | 3310   |
| IGSF11      | 152404 |
| IRX6        | 79190  |
| KCNA4       | 3739   |
| KLHL2       | 11275  |
| MAFG        | 4097   |
| MOB1A       | 55233  |
| NDUFA6      | 4700   |
| NEDD8       | 4738   |
| NFYB        | 4801   |
| NME9        | 347736 |
| OAT         | 4942   |
| OGFR        | 11054  |
| POLA1       | 5422   |
| POLD3       | 10714  |
| RAP1GAP     | 5909   |
| RFC3        | 5983   |
| RFC4        | 5984   |
| RNF186      | 54546  |
| SENP1       | 29843  |
| SEZ6        | 124925 |
| SLURP1      | 57152  |
| SS18L2      | 51188  |
| SUN5        | 140732 |
| TCTE1       | 202500 |
| TIMM22      | 29928  |
| UBE2M       | 9040   |
| UBE2V2      | 7336   |
| UHRF1       | 29128  |
| WDR33       | 55339  |
| XKR7        | 343702 |
| ZDHHC9      | 51114  |
| ZNF678      | 339500 |

**2 of 4 siRNAs validated**

| Gene Symbol | GENEID |
|-------------|--------|
| ACSM2B      | 348158 |
| AHCY        | 191    |
| AIRE        | 326    |
| ANO9        | 338440 |
| ANXA4       | 307    |
| APCDD1      | 147495 |
| AQP6        | 363    |
| ARL5A       | 26225  |
| ATF6B       | 1388   |
| BOK         | 666    |
| C12orf54    | 121273 |
| C16orf57    | 79650  |
| C20orf152   | 140894 |
| C22orf15    | 150248 |
| CARD17      | 440068 |
| CDYL        | 9425   |
| CHERP       | 10523  |
| CLEC4M      | 10332  |
| CLIC3       | 9022   |
| CNTF        | 1270   |
| CRYAA       | 1409   |
| DDX1        | 1653   |
| DHCR7       | 1717   |
| DNAJB1      | 3337   |
| DTX3        | 196403 |
| ECM1        | 1893   |
| EED         | 8726   |
| ERC2        | 26059  |
| FNDC7       | 163479 |
| FOXD4L1     | 200350 |
| FRRS1L      | 23732  |
| GALNT2      | 2590   |
| GLRX        | 2745   |
| GNAT1       | 2779   |
| GPC6        | 10082  |
| GPR3        | 2827   |
| GSK3B       | 2932   |
| HEPH        | 9843   |
| HIF1AN      | 55662  |
| HLA-DRB5    | 3127   |
| HMGCS2      | 3158   |
| HPX         | 3263   |
| HTR2A       | 3356   |
| IL17RA      | 23765  |
| IL22RA1     | 58985  |
| INS-IGF2    | 723961 |
| IQCA1       | 79781  |
| KIAA0317    | 9870   |
| KLHL30      | 377007 |
| KRT31       | 3881   |
| LAMA1       | 284217 |
| LIN28A      | 79727  |
| LMNB1       | 4001   |
| LPP         | 4026   |
| LRRC8D      | 55144  |
| MANF        | 7873   |
| MAP2K6      | 5608   |
| MDK         | 4192   |
| MEGF6       | 1953   |
| MGST3       | 4259   |
| MLANA       | 2315   |
| MUC7        | 4589   |
| MZB1        | 51237  |
| NACA2       | 342538 |
| NCBP1       | 4686   |
| NFRKB       | 4798   |

|          |           |
|----------|-----------|
| NOS2     | 4843      |
| OBP2A    | 29991     |
| OR2F2    | 135948    |
| OR2J2    | 26707     |
| OR2T5    | 401993    |
| OR52E2   | 119678    |
| OR6C68   | 403284    |
| PATE3    | 100169851 |
| PEX6     | 5190      |
| PHF3     | 23469     |
| PHOSPHO1 | 162466    |
| PLA2R1   | 22925     |
| PLEKHH1  | 57475     |
| PPP2R5B  | 5526      |
| PRPSAP2  | 5636      |
| R3HDM2   | 22864     |
| RAB4B    | 53916     |
| RAP1A    | 5906      |
| RAP2C    | 57826     |
| RASSF10  | 644943    |
| RASSF7   | 8045      |
| RBM10    | 8241      |
| RFC1     | 5981      |
| RNASEH2C | 84153     |
| RNF111   | 54778     |
| RNF26    | 79102     |
| RNF39    | 80352     |
| RNFT1    | 51136     |
| RSU1     | 6251      |
| SEC11B   | 157708    |
| SETD7    | 80854     |
| SETDB1   | 9869      |
| SFRS17A  | 8227      |
| SIRT2    | 22933     |
| SLC35E2  | 9906      |
| SNTB2    | 6645      |
| SPRR1A   | 6698      |
| STK16    | 8576      |
| STK36    | 27148     |
| SYCE1L   | 100130958 |
| SYCP2    | 10388     |
| SYDE1    | 85360     |
| SYNPO    | 11346     |
| TANK     | 10010     |
| TAS2R19  | 259294    |
| TBC1D21  | 161514    |
| TBX2     | 6909      |
| TEAD1    | 7003      |
| TIMP3    | 7078      |
| TIPIN    | 54962     |
| TNPO1    | 3842      |
| TRAF7    | 84231     |
| UBL3     | 5412      |
| VPS36    | 51028     |
| VSX2     | 338917    |
| ZBTB43   | 23099     |
| ZFP3     | 124961    |
| ZNF181   | 339318    |
| ZNF367   | 195828    |
| ZNF709   | 163051    |
