# Supplementary material
Source: PubMed Central journal article supplement (PMC4651756)
Supplement: NIHMS729683-supplement-9.pdf [file NIHMS729683-supplement-9.pdf]

**Supplemental Table 5.** The normalized cell viability ratio for each drug sensitivity screen replicate and the average is shown. The FDR adjusted p-value is also included. Note that the p values indicate differences from the non-targeting siRNA control and both increased and decreased sensitivities can yield significant p values. Only siRNAs causing decreased sensitivity are depicted in figures.

| Gene Symbol | Plate    | Well | Title  | Gene Accession | Sequence               | HU          |             |             |         |            | ATR inhibitor |             |             |         |            | Chk1 inhibitor |             |             |         |           |
|-------------|----------|------|--------|----------------|------------------------|-------------|-------------|-------------|---------|------------|---------------|-------------|-------------|---------|------------|----------------|-------------|-------------|---------|-----------|
|             |          |      |        |                |                        | Replicate 1 | Replicate 2 | Replicate 3 | Average | P value    | Replicate 1   | Replicate 2 | Replicate 3 | Average | P value    | Replicate 1    | Replicate 2 | Replicate 3 | Average | P value   |
| ABC8B       | Plate 01 | M19  | 11914  | NM_007188      | CAACCCUUCUGUCUCCUUUU   | 0.71        | 0.60        | 0.90        | 0.74    | 0.0818333  | 0.75          | 0.82        | 0.82        | 0.80    | 0.0002718  | 1.08           | 0.80        | 1.35        | 1.08    | 1.415E-05 |
| ABC8B       | Plate 01 | M19  | 11914  | NM_007188      | GCUCUCCGUGUCUCCAAAGA   | 0.79        | 0.73        | 0.88        | 0.80    | 0.8562224  | 1.03          | 0.97        | 0.91        | 0.97    | 0.1792524  | 0.67           | 0.77        | 0.87        | 0.77    | 0.301409  |
| ABC8B       | Plate 01 | M19  | 11914  | NM_007188      | CACACGACGUCUCCGUAAGA   | 0.82        | 0.81        | 0.81        | 0.81    | 0.0003461  | 0.62          | 0.69        | 0.69        | 0.62    | 0.0004581  | 0.68           | 0.85        | 0.83        | 0.377   | 0.280703  |
| BATS        | Plate 01 | M05  | 7920   | NM_021160      | GGAAAGGUUACUUGAUUG     | 0.74        | 0.74        | 0.76        | 0.75    | 0.1788989  | 0.82          | 0.87        | 1.04        | 0.82    | 0.0004581  | 0.68           | 0.75        | 0.86        | 0.93    | 0.026001  |
| BATS        | Plate 01 | M05  | 7920   | NM_021160      | UCUAUUGUCUGGACUUG      | 0.80        | 0.69        | 0.83        | 0.77    | 0.363566   | 1.12          | 0.83        | 0.84        | 0.83    | 0.0528922  | 0.57           | 0.52        | 0.76        | 0.67    | 0.004032  |
| BATS        | Plate 01 | M05  | 7920   | NM_021160      | CGCAACAGUUCUUGAGAA     | 0.13        | -0.08       | 0.92        | 0.32    | 7.32E-23   | 0.57          | 2.76        | 7.27        | 3.15    | 0          | 0.73           | 0.50        | 0.66        | 0.58    | 0.077E-09 |
| ADAM29      | Plate 01 | E06  | 11086  | NM_014269      | GAAGGAGGUCUUGCAUUG     | 0.84        | 0.59        | 0.87        | 0.77    | 0.236919   | 0.83          | 0.95        | 0.69        | 0.82    | 0.0008232  | 0.71           | 0.61        | 0.77        | 0.70    | 0.008825  |
| ADAM29      | Plate 01 | F13  | 21933  | NM_145029      | GAAGUAGUUGUCUCCUGA     | 1.20        | 0.81        | 0.91        | 0.96    | 0.2304978  | 0.65          | 0.90        | 0.69        | 0.79    | 0.814E-029 | 0.78           | 0.81        | 0.87        | 0.92    | 0.040493  |
| ADAM29      | Plate 01 | G06  | 11086  | NM_014269      | UGACAGAAUUGCAAAUAG     | 0.07        | 0.99        | 0.86        | 0.97    | 0.0273715  | 0.80          | 1.28        | 1.12        | 1.06    | 0.6619610  | 0.70           | 1.00        | 0.82        | 0.96    | 0.001562  |
| ADAM29      | Plate 01 | H06  | 11086  | NM_014269      | GGAAUUCUGCCACCCUGUA    | 0.99        | 0.80        | 0.84        | 0.88    | 0.4343799  | 0.98          | 1.08        | 1.22        | 1.09    | 0.9799688  | 1.03           | 1.01        | 0.97        | 1.00    | 0.004213  |
| AKAPBL      | Plate 01 | M04  | 26993  | NM_014371      | CGAAUACCGGACCUUUCUA    | 0.60        | 1.18        | 0.64        | 0.81    | 0.337694   | 0.24          | 1.06        | 0.62        | 0.64    | 3.068E-16  | 0.77           | 0.69        | 0.53        | 0.66    | 0.000255  |
| AKAPBL      | Plate 01 | M04  | 26993  | NM_014371      | UGAGUAGUUCGAGUUGUUG    | 0.79        | 0.69        | 0.77        | 0.75    | 0.191972   | 0.82          | 0.85        | 0.97        | 0.88    | 0.0124659  | 0.71           | 0.49        | 0.68        | 0.63    | 3.527E-06 |
| AKAPBL      | Plate 01 | L03  | 26993  | NM_014371      | GACGACGAGUUCGAGUUGA    | 0.81        | 0.81        | 0.81        | 0.81    | 0.0000000  | 0.54          | 0.90        | 0.69        | 0.69    | 0.0000000  | 0.78           | 0.85        | 0.87        | 0.92    | 0.040493  |
| ALKBH5      | Plate 01 | E08  | 54890  | NM_017758      | UGAAUUCACUCACUGCAUA    | 1.14        | 0.88        | 0.99        | 1.00    | 0.0003002  | 0.78          | 1.26        | 1.09        | 1.04    | 0.4819262  | 0.72           | 0.68        | 0.68        | 0.69    | 0.006335  |
| ALKBH5      | Plate 01 | F08  | 54890  | NM_017758      | GAUCUUCUGGCGCAAGUCA    | 1.30        | 0.58        | 0.80        | 0.89    | 0.735524   | 0.83          | 0.83        | 1.35        | 0.92    | 0.0052914  | 0.79           | 1.00        | 1.15        | 0.98    | 0.003315  |
| ALKBH5      | Plate 01 | G08  | 54890  | NM_017758      | GAGAAUUCUGGCGCAAGUCA   | 0.97        | 0.67        | 0.80        | 0.81    | 0.3732229  | 1.26          | 1.12        | 1.32        | 1.21    | 0.206397   | 0.97           | 0.77        | 0.73        | 0.82    | 0.950788  |
| ALKBH5      | Plate 01 | H08  | 54890  | NM_017758      | GGCGCAACGUCGAGUAGUCA   | 1.14        | 0.74        | 0.99        | 0.96    | 0.0999357  | 0.82          | 0.98        | 1.13        | 1.04    | 0.461803   | 0.91           | 0.84        | 1.49        | 1.08    | 2.581E-05 |
| ANKRD55     | Plate 01 | B00  | 79722  | NM_00103935    | GACGACGAGUUCGAGUUGA    | 0.84        | 0.98        | 0.82        | 0.89    | 0.396853   | 0.82          | 0.97        | 0.93        | 0.91    | 0.0173475  | 0.98           | 0.85        | 1.00        | 0.95    | 0.014018  |
| ANKRD55     | Plate 01 | C20  | 79722  | NM_00103935    | CGCGCAACCGGAGUUGUUG    | 0.95        | 0.84        | 1.10        | 0.97    | 0.445541   | 0.82          | 0.78        | 0.84        | 0.82    | 0.0006089  | 0.77           | 0.74        | 1.01        | 0.84    | 0.714558  |
| ANKRD55     | Plate 01 | D20  | 79722  | NM_00103935    | AGAAACCCGUGCCCGUAA     | 0.49        | 0.37        | 0.64        | 0.50    | 2.89E-09   | 0.45          | 1.16        | 0.82        | 0.81    | 1.869E-05  | 0.49           | 0.46        | 0.82        | 0.50    | 2.36E-17  |
| ANKX4       | Plate 01 | M13  | 307    | NM_001153      | GAUGAGGUCUUGCAUUAUG    | 0.47        | 0.63        | 1.06        | 0.72    | 0.008235   | 0.54          | 1.05        | 0.90        | 0.83    | 0.0003248  | 0.50           | 0.54        | 0.84        | 0.63    | 1.089E-06 |
| ANKX4       | Plate 01 | N13  | 307    | NM_001153      | GACCAACGACUUCGUGUUG    | 0.55        | 0.55        | 1.39        | 0.83    | 0.194432   | 0.48          | 0.73        | 1.46        | 0.89    | 0.0037373  | 0.51           | 0.49        | 1.16        | 0.72    | 0.0004761 |
| ANKX4       | Plate 01 | O13  | 307    | NM_001153      | GACGCAAAUUCGACUUGUUG   | 0.68        | 0.37        | 0.60        | 0.55    | 2.89E-09   | 1.07          | 0.74        | 2.49        | 1.43    | 0.0038994  | 0.53           | 0.44        | 0.66        | 0.55    | 4.22E-12  |
| ATP5G3      | Plate 01 | J03  | 518    | NM_001689      | GCUCUUCGAGUUAUUAUUG    | 0.55        | 0.62        | 0.58        | 0.58    | 2.415E-06  | 0.98          | 0.95        | 1.26        | 0.90    | 0.0002174  | 0.90           | 0.78        | 0.81        | 0.83    | 0.765651  |
| ATP5G3      | Plate 01 | K03  | 518    | NM_001689      | CAGCAGAGACUAGAGUAGU    | 1.02        | 1.01        | 0.75        | 0.92    | 0.144358   | 0.66          | 0.71        | 1.35        | 0.91    | 0.0058336  | 0.69           | 0.68        | 0.63        | 0.67    | 0.007143  |
| ATP5G3      | Plate 01 | X03  | 518    | NM_001689      | AGAGUUCGACUAGAGACAA    | 0.65        | 0.81        | 0.74        | 0.74    | 0.100388   | 1.13          | 0.55        | 1.10        | 0.60    | 1.427E-27  | 0.91           | 0.83        | 0.93        | 0.89    | 0.138873  |
| ATP5G3      | Plate 01 | L03  | 518    | NM_001689      | GAGUUCGACUAGAGUAGU     | 0.83        | 0.70        | 0.75        | 0.76    | 0.296111   | 0.88          | 0.84        | 1.09        | 0.84    | 0.0697708  | 0.96           | 0.90        | 0.94        | 0.83    | 0.021195  |
| BH2         | Plate 01 | M18  | 56898  | NM_020139      | UGAUUUCUGUUGUUGUUG     | 0.59        | 0.59        | 0.57        | 0.57    | 0.0000000  | 0.52          | 0.62        | 0.62        | 0.52    | 0.0000000  | 0.65           | 0.65        | 0.66        | 0.64    | 0.146E-05 |
| BH2         | Plate 01 | N18  | 56898  | NM_020139      | GAUCUUCUGUUGUUGUUG     | 0.88        | 0.91        | 0.84        | 0.88    | 0.405524   | 0.78          | 0.98        | 1.12        | 0.95    | 0.0766949  | 0.79           | 0.79        | 0.79        | 0.79    | 0.613775  |
| BH2         | Plate 01 | O18  | 56898  | NM_020139      | GACUUCUGUUGUUGUUGUUG   | 0.97        | 0.96        | 1.00        | 0.97    | 0.009469   | 0.97          | 1.07        | 0.94        | 1.00    | 0.286809   | 1.11           | 1.19        | 1.12        | 1.14    | 1.354E-08 |
| CI10r45     | Plate 01 | E13  | 21933  | NM_145013      | GGUUCGUCUUGUUGUUGUUG   | 1.03        | 0.88        | 0.80        | 0.90    | 0.285898   | 0.97          | 0.98        | 0.82        | 0.96    | 0.1186773  | 0.67           | 0.90        | 0.73        | 0.77    | 0.23098   |
| CI10r45     | Plate 01 | F13  | 21933  | NM_145013      | GAUCUUCUGUUGUUGUUGUUG  | 1.00        | 0.80        | 0.90        | 0.90    | 0.0000000  | 0.80          | 0.85        | 0.90        | 0.85    | 0.0000000  | 0.80           | 0.85        | 0.90        | 0.85    | 0.0000000 |
| CI10r45     | Plate 01 | G13  | 21933  | NM_145013      | GCUCUUCUGUUGUUGUUGUUG  | 0.78        | 0.62        | 0.72        | 0.71    | 0.0313667  | 0.78          | 0.94        | 1.01        | 0.91    | 0.0321254  | 0.86           | 0.78        | 0.94        | 0.86    | 0.378882  |
| CI10r45     | Plate 01 | H13  | 21933  | NM_145013      | GACAAACGUCGAGUUGUUGUUG | 0.83        | 0.77        | 0.98        | 0.86    | 0.611295   | 0.87          | 0.80        | 0.62        | 0.76    | 2.158E-10  | 0.74           | 1.03        | 1.06        | 1.28    | 1.0E-12   |
| CI10r45     | Plate 01 | I07  | 121273 | NM_152319      | GAGCAAGACGACUUCUUGUUG  | 0.88        | 0.68        | 0.81        | 0.72    | 0.068474   | 0.59          | 0.79        | 0.62        | 0.67    | 6.201E-09  | 0.48           | 0.46        | 0.39        | 0.44    | 6.66E-25  |
| CI10r45     | Plate 01 | O07  | 121273 | NM_152319      | UUAUCUUCGUCUUGUUGUUG   | 0.82        | 0.88        | 0.76        | 0.82    | 0.925339   | 0.37          | 0.46        | 0.55        | 0.46    | 1.93E-24   | 0.45           | 0.39        | 0.51        | 0.45    | 5.312E-24 |
| CI10r45     | Plate 01 | N12  | 121273 | NM_152319      | GACUUCGUCUUGUUGUUGUUG  | 0.81        | 0.62        | 0.59        | 0.54    | 1.503E-09  | 0.71          | 0.57        | 0.54        | 0.61    | 8.95E-12   | 0.42           | 0.38        | 0.49        | 0.43    | 1.741E-29 |
| CI10r45     | Plate 01 | B09  | 79173  | NM_024323      | GACACUUCGUCUUGUUGUUG   | 0.66        | 0.71        | 1.30        | 0.89    | 0.702006   | 0.88          | 0.86        | 0.44        | 0.56    | 1.451E-17  | 1.11           | 1.06        | 1.60        | 1.26    | 1.96E-12  |
| CI10r45     | Plate 01 | C09  | 79173  | NM_024323      | GAUCUUCGUCUUGUUGUUGUUG | 0.87        | 0.70        | 0.94        | 0.84    | 0.919753   | 0.88          | 0.96        | 0.78        | 0.87    | 0.0093775  | 0.80           | 0.69        | 0.86        | 0.78    | 0.472878  |
| CI10r45     | Plate 01 | D09  | 79173  | NM_024323      | CGAUUUCGUCUUGUUGUUGUUG | 0.88        | 0.38        | 1.09        | 0.79    | 0.0517728  | 0.53          | 1.79        | 1.20        | 1.17    | 0.641208   | 0.82           | 0.85        | 0.54        | 0.74    | 0.0242402 |
| CANX1S      | Plate 01 | B19  | 779    | NM_000069      | GACUUCGUCUUGUUGUUGUUG  | 0.87        | 1.05        | 1.11        | 1.00    | 0.0701129  | 0.91          | 1.14        | 1.03        | 1.03    | 0.4754744  | 0.92           | 0.90        | 0.87        | 0.90    | 1.032226  |
| CANX1S      | Plate 01 | D19  | 779    | NM_000069      | UUAUCUUCGUCUUGUUGUUG   | 0.79        | 0.60        | 0.97        | 0.81    | 0.138143   | 0.93          | 1.09        | 1.03        | 0.91    | 0.0000000  | 0.97           | 0.91        | 0.97        | 0.91    | 0.018073  |
| CANX1S      | Plate 01 | E19  | 779    | NM_000069      | UUAUCUUCGUCUUGUUGUUG   | 0.80        | 0.50        | 0.79        | 0.81    | 0.805665   | 1.10          | 1.10        | 1.10        | 1.07    | 0.819411   | 0.74           | 0.82        | 0.70        | 0.86    | 0.170048  |
| CAMK1       | Plate 01 | I17  | 8536   | NM_003656      | GAGUUCGUCUUGUUGUUGUUG  | 0.70        | 0.84        | 0.71        | 0.63    | 0.0002325  | 0.63          | 1.05        | 0.74        | 0.81    | 0.0007121  | 1.14           | 0.88        | 0.84        | 0.96    | 0.019993  |
| CAMK1       | Plate 01 | F17  | 8536   | NM_003656      | GAAGCGGACUUCGUCUUGUUG  | 0.65        | 0.76        | 0.77        | 0.72    | 0.798218   | 1.04          | 0.88        | 1.07        | 0.80    | 0.766E-05  | 0.76           | 1.03        | 0.98        | 0.92    | 0.4073051 |
| CAMK1       | Plate 01 | G17  | 8536   | NM_003656      | GGUUCUUCGUCUUGUUGUUG   | 0.80        | 0.85        | 0.94        | 0.90    | 0.256896   | 1.02          | 0.85        | 1.16        | 1.34    | 0.0372403  | 0.97           | 1.06        | 1.06        | 1.03    | 7.501E-05 |
| CAMK1       | Plate 01 | H17  | 8536   | NM_003656      | GGUUCUUCGUCUUGUUGUUG   | 0.78        | 0.61        | 0.97        | 0.78    | 0.00998463 | 1.17          | 1.12        | 1.14        | 1.07    | 0.0000000  | 0.82           | 0.81        | 0.82        | 0.83    | 1.911008  |
| CHEK1       | Plate 01 | B04  | 1111   | NM_001274      | GCUCUUCGUCUUGUUGUUG    | 0.64        | 0.84        | 1.08        | 0.86    | 0.869107   | 0.73          | 1.20        | 0.76        | 0.89    | 0.010532   | 0.89           | 0.78        | 1.28        | 0.98    | 0.0049453 |
| CHEK1       | Plate 01 | C04  | 1111   | NM_001274      | AAAGUAGUUGUUGUUGUUG    | 0.17        | 0.19        | 0.14        | 0.17    | 0          | 0.39          | 2.08        | 0.52        | 1.00    | 1.445E-05  | 0.21           | 0.23        | 0.17        | 0.20    | 0         |
| CHEK1       | Plate 01 | D04  | 1111   | NM_001274      | AGAUUAGUUGUUGUUGUUG    | 0.29        | 0.42        | 0.32        | 0.34    | 1.555E-33  | 0.79          | 0.89        | 0.59        | 0.76    | 1.072E-05  | 0.35           | 0.70        | 0.54        | 0.      |           |

|         |          |     |        |             |                      |      |      |      |      |           |      |      |      |      |             |      |      |      |      |            |
|---------|----------|-----|--------|-------------|----------------------|------|------|------|------|-----------|------|------|------|------|-------------|------|------|------|------|------------|
| LCT     | Plate 01 | C08 | 3938   | NM_002299   | UCUUAUCUUCUGGACUUA   | 1.07 | 1.17 | 0.92 | 1.05 | 0.0010802 | 0.66 | 0.75 | 0.94 | 0.78 | 7.6868-05   | 0.69 | 0.82 | 0.88 | 0.80 | 0.653124   |
| LCT     | Plate 01 | D08 | 3938   | NM_002299   | AGUCAGUACCCUUAUUA    | 0.86 | 0.79 | 0.70 | 0.78 | 0.495909  | 0.69 | 1.09 | 1.07 | 0.85 | 0.002144    | 0.72 | 0.67 | 0.64 | 0.68 | 0.0018937  |
| LEO1    | Plate 01 | H15 | 123169 | NM_138792   | UCUUAUCUUCUGGACUUA   | 1.25 | 0.84 | 0.75 | 0.89 | 0.00184   | 0.69 | 0.75 | 0.84 | 0.77 | 1.6875-05   | 0.75 | 0.80 | 0.77 | 0.80 | 0.3352520  |
| LEO1    | Plate 01 | J15 | 123169 | NM_138792   | GCAACAGUACUUAUUA     | 0.88 | 0.81 | 0.95 | 0.88 | 0.383725  | 0.68 | 1.08 | 0.63 | 0.79 | 0.96-05     | 0.92 | 0.81 | 1.07 | 0.87 | 0.0089651  |
| LEO1    | Plate 01 | K15 | 123169 | NM_138792   | GCCGGUACUUCUUAUUA    | 0.73 | 0.74 | 0.81 | 0.76 | 0.263967  | 0.71 | 0.74 | 0.45 | 0.63 | 4.297E-11   | 0.33 | 0.38 | 0.46 | 0.39 | 3.005E-36  |
| LEO1    | Plate 01 | L15 | 123169 | NM_138792   | UCAGAGAACCAUUAUUA    | 0.89 | 0.70 | 0.71 | 0.77 | 0.285543  | 0.43 | 0.65 | 0.41 | 0.50 | 4.732E-21   | 0.29 | 0.30 | 0.30 | 0.30 | 0          |
| LCAL54  | Plate 01 | M20 | 3960   | NM_006149   | ACAUAGUACCCUUAUUA    | 0.97 | 1.09 | 1.55 | 1.15 | 5.121E-05 | 0.53 | 1.02 | 0.52 | 0.73 | 2.174E-07   | 0.56 | 0.67 | 0.76 | 0.66 | 0.0003352  |
| LCAL54  | Plate 01 | Q20 | 3960   | NM_006149   | GCGAGCAUAGUUAUUA     | 0.86 | 0.64 | 0.94 | 0.93 | 0.000216  | 0.69 | 0.84 | 0.60 | 0.71 | 0.00161     | 0.50 | 0.60 | 0.38 | 0.40 | 0.0003352  |
| LCAL54  | Plate 01 | Q20 | 3960   | NM_006149   | GCGAGAAAGCAUUAUUA    | 0.91 | 0.69 | 0.97 | 0.88 | 5.002229  | 0.64 | 1.09 | 1.09 | 0.87 | 0.00161     | 0.56 | 0.59 | 0.62 | 0.67 | 0.0005804  |
| LN28A   | Plate 01 | B11 | 79727  | NM_024674   | GGUGGAGUUAUUCUGUUA   | 0.88 | 0.95 | 0.93 | 0.92 | 0.136752  | 0.68 | 0.75 | 0.48 | 0.69 | 2.979E-08   | 0.74 | 0.80 | 0.77 | 0.77 | 0.340303   |
| LN28A   | Plate 01 | C11 | 79727  | NM_024674   | CUACAUUGUGGAGUUA     | 0.54 | 0.41 | 0.51 | 0.49 | 4.043E-13 | 0.34 | 0.48 | 0.28 | 0.37 | 1.33E-38    | 0.61 | 0.53 | 0.81 | 0.65 | 4.789E-05  |
| LN28A   | Plate 01 | D11 | 79727  | NM_024674   | GAAGGUGUCUGGAGUUA    | 0.58 | 0.56 | 0.53 | 0.56 | 9.088E-08 | 0.59 | 1.16 | 0.81 | 0.86 | 0.0010888   | 0.80 | 0.77 | 0.92 | 0.83 | 0.780909   |
| LZT52   | Plate 01 | C12 | 84445  | NM_032429   | GCGAGAAUUCUGGAGUUA   | 0.69 | 0.69 | 0.93 | 0.53 | 0.0002361 | 0.69 | 0.84 | 0.59 | 0.65 | 3.937E-10   | 0.63 | 0.74 | 0.94 | 0.83 | 2.521E-35  |
| LZT52   | Plate 01 | D12 | 84445  | NM_032429   | GCAUUCUGGAGGAGUUA    | 1.04 | 0.88 | 0.92 | 0.88 | 0.378142  | 0.78 | 0.56 | 0.59 | 0.65 | 9.933E-10   | 0.43 | 0.65 | 0.66 | 0.60 | 6.02E-08   |
| MAB21L2 | Plate 01 | I07 | 10586  | NM_006439   | GCAUUCUGGAGGAGUUA    | 0.88 | 0.73 | 0.82 | 0.88 | 0.514486  | 0.78 | 0.86 | 0.83 | 0.82 | 0.001342    | 0.83 | 0.67 | 0.79 | 0.83 | 0.751819   |
| MAB21L2 | Plate 01 | J07 | 10586  | NM_006439   | GCGUUCUGGAGGAGUUA    | 1.14 | 0.87 | 1.26 | 1.09 | 0.002742  | 1.03 | 1.19 | 0.76 | 0.99 | 0.21198     | 0.77 | 0.91 | 1.08 | 0.92 | 0.9565431  |
| MAB21L2 | Plate 01 | K07 | 10586  | NM_006439   | GCUUUCUGGAGGAGUUA    | 1.66 | 0.68 | 1.31 | 1.23 | 1.077E-05 | 0.97 | 1.29 | 1.50 | 1.26 | 0.139718    | 1.26 | 1.00 | 1.39 | 1.21 | 4.587E-11  |
| MANF    | Plate 01 | B13 | 7873   | NM_006010   | GCAAAAGUUCUGGUGUUA   | 1.29 | 0.91 | 0.99 | 1.06 | 0.0090345 | 0.39 | 0.51 | 0.60 | 0.50 | 2.103E-20   | 1.00 | 0.79 | 0.63 | 0.81 | 0.651461   |
| MANF    | Plate 01 | C13 | 7873   | NM_006010   | UGAAGUUCUCCGAGUUA    | 1.03 | 0.81 | 0.72 | 0.77 | 0.346703  | 1.71 | 0.85 | 0.66 | 0.74 | 5.102E-08   | 0.69 | 0.70 | 0.78 | 0.72 | 0.0434964  |
| MLANA   | Plate 01 | M15 | 2315   | NM_005511   | GAAUUCUUCUGGAGUUA    | 0.74 | 0.73 | 0.66 | 0.76 | 0.239E16  | 0.63 | 1.59 | 0.65 | 0.96 | 0.0081778   | 1.03 | 0.88 | 1.02 | 0.96 | 0.002415   |
| MLANA   | Plate 01 | N15 | 2315   | NM_005511   | CCAAUUCUUCUGGAGUUA   | 0.81 | 0.87 | 1.31 | 1.00 | 0.243544  | 0.68 | 1.88 | 1.21 | 1.25 | 0.504978    | 0.71 | 0.62 | 1.02 | 0.78 | 0.302413   |
| MLANA   | Plate 01 | O15 | 2315   | NM_005511   | ACAAAGUAGCCCAAGUUA   | 1.03 | 1.04 | 0.89 | 0.99 | 0.0158574 | 1.11 | 0.46 | 1.01 | 0.86 | 0.00038     | 0.44 | 0.64 | 0.53 | 0.54 | 4.869E-13  |
| NME9    | Plate 01 | B17 | 34736  | NM_178130   | CAAGACUUGGUGGAGUUA   | 0.59 | 0.41 | 0.76 | 0.59 | 4.507E-07 | 0.78 | 0.88 | 0.92 | 0.86 | 0.0057113   | 0.75 | 0.65 | 1.10 | 0.84 | 0.974608   |
| NME9    | Plate 01 | C17 | 34736  | NM_178130   | UCUUAUCUUCUGGAGUUA   | 0.65 | 0.57 | 0.67 | 0.65 | 0.0001742 | 0.80 | 0.70 | 0.75 | 0.75 | 1.338E-05   | 0.61 | 0.57 | 0.57 | 0.58 | 1.786E-08  |
| NME9    | Plate 01 | D17 | 34736  | NM_178130   | CAUCUUCUUCUGGAGUUA   | 0.55 | 0.59 | 0.71 | 0.65 | 0.001892  | 0.60 | 0.68 | 0.92 | 0.70 | 0.94        | 0.62 | 0.63 | 0.64 | 0.65 | 0.814828   |
| NTM2    | Plate 01 | M09 | 84628  | NM_032536   | GGGAGAAUUCUUAUUA     | 0.79 | 0.68 | 0.97 | 0.81 | 0.744885  | 0.73 | 0.73 | 0.85 | 0.77 | 4.922E-05   | 0.73 | 0.98 | 0.96 | 0.89 | 0.173589   |
| NTM2    | Plate 01 | N09 | 84628  | NM_032536   | GAGAGUUCUUCUGGAGUUA  | 0.75 | 0.59 | 0.77 | 0.70 | 0.204092  | 1.03 | 1.09 | 1.11 | 1.08 | 0.90974     | 0.71 | 0.58 | 0.70 | 0.66 | 0.0004226  |
| NTM2    | Plate 01 | O09 | 84628  | NM_032536   | AGACUUCUGGAGUUA      | 0.88 | 0.87 | 0.94 | 0.89 | 0.255199  | 0.91 | 1.33 | 1.19 | 1.14 | 0.652017    | 0.83 | 0.79 | 0.85 | 0.83 | 0.852962   |
| NUD10   | Plate 01 | H12 | 170685 | NM_153183   | UGGCAUUCUUCUGGAGUUA  | 1.50 | 0.52 | 0.79 | 0.69 | 0.0002361 | 0.52 | 0.70 | 0.96 | 0.76 | 0.0129231   | 0.51 | 0.46 | 0.30 | 0.42 | 4.482E-30  |
| NUD10   | Plate 01 | F14 | 170685 | NM_153183   | GCGAGUUCUUCUGGAGUUA  | 0.66 | 0.55 | 0.69 | 0.64 | 0.0002673 | 0.83 | 1.04 | 0.97 | 0.95 | 0.0951197   | 0.80 | 0.72 | 0.71 | 0.74 | 0.11946    |
| NUD10   | Plate 01 | G14 | 170685 | NM_153183   | GCCGAAUUCUUCUGGAGUUA | 1.52 | 0.73 | 1.00 | 1.08 | 0.0019363 | 0.77 | 1.50 | 1.31 | 1.19 | 0.520082    | 1.34 | 0.97 | 1.03 | 1.11 | 3.101E-07  |
| NUD10   | Plate 01 | H14 | 170685 | NM_153183   | GCGAAUUCUUCUGGAGUUA  | 1.23 | 0.96 | 1.12 | 1.10 | 0.814E-05 | 0.60 | 1.48 | 1.70 | 1.26 | 0.52873     | 0.96 | 1.10 | 1.17 | 1.08 | 0.3078E-06 |
| OBP2A   | Plate 01 | I06 | 29991  | NM_014582   | AGCCUUCUUCUGGAGUUA   | 0.54 | 0.22 | 0.38 | 0.38 | 0.407E-30 | 0.53 | 0.64 | 0.29 | 0.48 | 1.348E-23   | 0.60 | 0.54 | 0.39 | 0.51 | 3.21E-16   |
| OBP2A   | Plate 01 | J06 | 29991  | NM_014582   | UGGCAUUCUUCUGGAGUUA  | 1.50 | 0.52 | 0.79 | 0.69 | 0.0002361 | 0.52 | 0.64 | 0.33 | 0.65 | 3.937E-10   | 0.63 | 0.74 | 0.94 | 0.84 | 0.6105E-08 |
| OBP2A   | Plate 01 | K06 | 29991  | NM_014582   | AGAAUUCUUCUGGAGUUA   | 1.03 | 0.85 | 1.11 | 1.00 | 0.0124552 | 0.49 | 0.54 | 0.65 | 0.62 | 5.507E-11   | 0.77 | 0.59 | 0.72 | 0.69 | 0.0049004  |
| OBP2A   | Plate 01 | L06 | 29991  | NM_014582   | UUAAGAAUUCUGGAGUUA   | 0.54 | 0.64 | 0.35 | 0.51 | 3.855E-12 | 0.68 | 0.45 | 0.38 | 0.44 | 2.096E-26   | 0.85 | 0.97 | 0.77 | 0.86 | 0.358448   |
| ORR1R   | Plate 01 | E15 | 219479 | NM_00100474 | GGUGGAGUUCUUAUUA     | 0.99 | 0.86 | 0.90 | 0.92 | 0.154992  | 1.03 | 0.93 | 0.92 | 0.95 | 0.123346    | 0.94 | 0.97 | 0.79 | 0.90 | 0.102389   |
| ORR1R   | Plate 01 | F15 | 219479 | NM_00100474 | GCGUUCUUCUGGAGUUA    | 1.03 | 0.83 | 0.94 | 0.94 | 0.101449  | 0.78 | 0.92 | 1.03 | 0.91 | 0.0153589   | 0.80 | 0.85 | 0.72 | 0.79 | 0.58369    |
| ORR1R   | Plate 01 | G15 | 219479 | NM_00100474 | GGUUAUUCUGGAGUUA     | 0.95 | 0.78 | 0.73 | 0.73 | 0.0002361 | 0.91 | 0.79 | 0.96 | 0.86 | 0.0129231   | 0.54 | 0.62 | 0.73 | 0.93 | 0.869857   |
| ORR1R   | Plate 01 | H15 | 219479 | NM_00100474 | GAAGCAGCAUUCUUAUUA   | 1.05 | 0.77 | 0.62 | 0.81 | 0.61319   | 1.00 | 0.96 | 0.81 | 0.82 | 0.0008286   | 0.84 | 1.06 | 0.80 | 0.80 | 0.117293   |
| PEX8    | Plate 01 | I18 | 5190   | NM_000287   | GCCGAGUUCUUAUUA      | 0.90 | 0.56 | 0.59 | 0.68 | 0.0041373 | 1.03 | 1.60 | 0.65 | 1.09 | 0.481808    | 0.84 | 1.06 | 0.88 | 0.68 | 0.000782   |
| PEX8    | Plate 01 | J18 | 5190   | NM_000287   | CAAGGAGUUCUGUUA      | 0.88 | 1.02 | 0.99 | 0.96 | 0.036305  | 1.02 | 0.87 | 0.88 | 0.95 | 0.100711    | 0.76 | 0.95 | 0.93 | 0.83 | 0.212924   |
| PEX8    | Plate 01 | K18 | 5190   | NM_000287   | AGUUCUUCUUAUUA       | 1.08 | 0.79 | 0.93 | 0.94 | 0.114042  | 0.82 | 0.78 | 0.77 | 0.79 | 0.001891    | 0.63 | 0.67 | 0.83 | 0.78 | 0.317949   |
| PEX8    | Plate 01 | L18 | 5190   | NM_000287   | UGGAAUUCUUCUGGAGUUA  | 0.62 | 0.67 | 0.63 | 0.67 | 0.503236  | 0.51 | 0.62 | 0.22 | 0.61 | 0.029162    | 0.54 | 0.62 | 0.69 | 0.67 | 4.401E-11  |
| PHF23   | Plate 01 | I04 | 79142  | NM_024297   | GCAAGAAUUCUGGAGUUA   | 0.78 | 0.80 | 0.70 | 0.76 | 0.260604  | 0.82 | 1.11 | 0.59 | 0.84 | 0.0008545   | 0.72 | 0.61 | 0.58 | 0.64 | 2.43E-05   |
| PHF23   | Plate 01 | J04 | 79142  | NM_024297   | AAAGCGGAGAAUUAUUA    | 0.82 | 0.61 | 0.86 | 0.76 | 0.232378  | 0.55 | 1.53 | 0.64 | 0.91 | 0.000713    | 0.88 | 1.02 | 1.08 | 0.99 | 0.000649   |
| PHF23   | Plate 01 | K04 | 79142  | NM_024297   | CAAAAAGUACCGAGUUA    | 0.70 | 0.68 | 0.74 | 0.71 | 0.0357279 | 0.79 | 0.89 | 1.02 | 0.90 | 0.023367    | 0.65 | 0.73 | 0.81 | 0.73 | 0.058945   |
| PHF23   | Plate 01 | L04 | 79142  | NM_024297   | CUAACUUCUUCUGGAGUUA  | 1.51 | 1.20 | 0.97 | 1.56 | 0.1015502 | 0.41 | 0.65 | 1.01 | 0.69 | 1.42E-09    | 1.18 | 0.67 | 0.83 | 0.89 | 2.8944E-22 |
| POLD1   | Plate 01 | E03 | 5424   | NM_002691   | GCAUUCUUCUGGAGUUA    | 0.95 | 0.75 | 0.87 | 0.79 | 0.130588  | 0.49 | 0.68 | 0.32 | 0.49 | 0.0002361   | 0.58 | 0.44 | 0.65 | 0.44 | 6.412E-28  |
| POLD1   | Plate 01 | F03 | 5424   | NM_002691   | GCAAGAAUUCUGGAGUUA   | 1.02 | 0.79 | 0.80 | 0.77 | 0.347439  | 0.44 | 0.80 | 0.61 | 0.62 | 3.197E-12   | 1.12 | 0.87 | 0.90 | 0.96 | 0.006293   |
| POLD1   | Plate 01 | G03 | 5424   | NM_002691   | GGAGUUCUUCUGGAGUUA   | 1.08 | 0.82 | 1.13 | 1.01 | 0.0084915 | 0.70 | 0.85 | 0.72 | 0.76 | 1.897E-05   | 0.87 | 0.74 | 0.57 | 0.53 | 0.032046   |
| POLD1   | Plate 01 | H03 | 5424   | NM_002691   | CCGACUUCUUCUGGAGUUA  | 0.81 | 0.62 | 0.75 | 0.60 | 0.0013956 | 1.25 | 0.97 | 0.32 | 0.28 | 0           | 0.51 | 0.46 | 0.47 | 0.48 | 4.206E-19  |
| PRN3    | Plate 01 | I02 | 5657   | NM_002777   | UGGCAUUCUUCUGGAGUUA  | 0.73 | 0.88 | 0.81 | 0.81 | 0.740317  | 0.12 | 0.25 | 1.37 | 1.08 | 0.906742    | 0.81 | 0.92 | 0.87 | 0.87 | 0.300105   |
| PRN3    | Plate 01 | J02 | 5657   | NM_002777   | GCAUUCUUCUGGAGUUA    | 0.92 | 0.82 | 0.92 | 0.85 | 0.0020944 | 0.92 | 2.42 | 2.61 | 0.92 | 0.78571E-11 | 0.74 | 0.74 | 0.74 | 0.74 | 0.220222   |
| PRN3    | Plate 01 | O22 | 5657   | NM_002777   | ACAUUCUUCUGGAGUUA    | 0.41 | 0.84 | 0.57 | 0.60 | 2.044E-06 | 0.40 | 0.31 | 0.46 | 0.39 | 7.247E-34   | 0.30 | 0.35 | 0.40 | 0.35 | 0          |
| RAP1A   | Plate 01 | E12 | 5906   | NM_002884   | GAUAGAAUUCUUAUUA     | 0.86 | 0.66 | 0.58 | 0.70 | 0.0161088 | 0.52 | 0.53 | 0.74 | 0.60 | 7.531E-13   | 0.73 | 0.73 | 0.67 | 0.70 | 0.013213   |
| RAP1A   | Plate 01 | F12 | 5906   | NM_002884   | CAUUAUUCUUCUGGAGUUA  | 0.74 | 0.72 | 0.68 | 0.71 | 0.485995  | 0.78 | 0.83 | 1.20 | 0.94 | 0.0504636   | 0.95 | 0.92 | 0.92 | 0.93 | 0.024622   |
| R       |          |     |        |             |                      |      |      |      |      |           |      |      |      |      |             |      |      |      |      |            |

|         |          |     |        |              |                    |      |      |      |      |           |       |      |       |       |             |      |      |      |      |            |
|---------|----------|-----|--------|--------------|--------------------|------|------|------|------|-----------|-------|------|-------|-------|-------------|------|------|------|------|------------|
| ABCC5   | Plate 02 | F11 | 10057  | NM_001023587 | UGCGAAGGUGUUGUGAU  | 0.92 | 0.88 | 0.82 | 0.87 | 0.635129  | 0.65  | 0.80 | 0.80  | 0.75  | 0.9851E-05  | 0.72 | 0.95 | 0.84 | 0.83 | 0.704616   |
| ABCC5   | Plate 02 | G11 | 10057  | NM_001023587 | AGAAUGGACCGUUGAGU  | 1.25 | 0.99 | 0.97 | 1.07 | 0.0014738 | 0.91  | 0.87 | 0.84  | 0.87  | 0.0289115   | 0.88 | 0.83 | 0.81 | 0.84 | 0.589666   |
| ABCC5   | Plate 02 | H11 | 10057  | NM_001023587 | GAAGGCGGUGGUGAGUA  | 0.77 | 0.77 | 0.72 | 0.77 | 0.0002083 | 0.76  | 0.62 | 0.71  | 0.71  | 0.0000000   | 0.65 | 0.65 | 0.64 | 0.65 | 0.463E-06  |
| ALB     | Plate 02 | A10 | 213    | NM_0004477   | GACAAUUAUUGGAGUA   | 0.65 | 1.18 | 1.13 | 1.05 | 0.0035279 | 0.96  | 0.88 | 0.97  | 0.87  | 0.0218914   | 0.83 | 0.84 | 1.02 | 0.93 | 0.020946   |
| ALB     | Plate 02 | B10 | 213    | NM_0004477   | GCAAGAAAGGCAUUGUAU | 0.24 | 0.78 | 0.44 | 0.49 | 7.445E-19 | 0.96  | 0.47 | 1.04  | 0.82  | 0.0006156   | 0.33 | 0.95 | 0.46 | 0.58 | 8.888E-14  |
| ALB     | Plate 02 | C10 | 213    | NM_0004477   | GAUUGAUCUCCAGUAUAC | 0.65 | 0.67 | 0.60 | 0.64 | 0.0001157 | 0.94  | 0.76 | 0.99  | 0.90  | 0.0679891   | 0.56 | 0.65 | 0.64 | 0.62 | 1.2E-06    |
| ANKS3   | Plate 02 | D10 | 213    | NM_0004477   | GGUGUGUUUUGGUGAGU  | 0.76 | 1.13 | 0.77 | 0.89 | 0.647941  | 1.05  | 0.75 | 0.84  | 0.88  | 0.0369911   | 0.74 | 0.71 | 0.65 | 0.70 | 0.010109   |
| ANKS3   | Plate 02 | E10 | 124401 | NM_133450    | GCGCGAAGUUGGAGUA   | 0.63 | 0.87 | 0.87 | 0.87 | 0.0000000 | 0.92  | 0.87 | 0.87  | 0.87  | 0.0000000   | 0.80 | 0.77 | 0.80 | 0.81 | 4.705E-06  |
| ANKS3   | Plate 02 | F10 | 124401 | NM_133450    | GCGCGAAGUUGGAGUA   | 1.45 | 1.03 | 1.02 | 1.17 | 1.972E-05 | 0.92  | 0.90 | 0.78  | 0.87  | 0.0293112   | 1.03 | 0.70 | 1.30 | 1.01 | 0.0016033  |
| ANKS3   | Plate 02 | G10 | 124401 | NM_133450    | GAAUUGGCAUCCAGCGU  | 0.88 | 1.07 | 0.84 | 0.93 | 0.202492  | 1.07  | 0.88 | 0.91  | 0.83  | 0.0074478   | 0.87 | 0.79 | 0.86 | 0.84 | 0.589273   |
| ANKS3   | Plate 02 | H10 | 124401 | NM_133450    | GCAACGAGCAUCCGCGUA | 1.26 | 1.33 | 0.88 | 1.16 | 3.793E-05 | 1.16  | 0.81 | 0.63  | 0.87  | 0.0117686   | 1.07 | 1.54 | 0.88 | 1.17 | 1.801E-08  |
| APCD11  | Plate 02 | A21 | 147495 | NM_153000    | GCUCAAAUCCUCCAGUAU | 0.72 | 1.57 | 1.37 | 1.22 | 1.404E-05 | -0.69 | 1.33 | -2.20 | -0.92 | 5.305E-16   | 0.94 | 3.81 | 0.45 | 1.73 | 4.691E-10  |
| APCD11  | Plate 02 | B21 | 147495 | NM_153000    | GCUCAAAUCCUCCAGUAU | 0.61 | 0.69 | 1.25 | 0.95 | 0.0000000 | 0.97  | 0.99 | 1.12  | 1.94  | 0.9592956   | 0.71 | 0.97 | 1.06 | 0.81 | 0.5430031  |
| APCD11  | Plate 02 | C21 | 147495 | NM_153000    | CAACUACUCCAGCCGAG  | 0.77 | 0.80 | 0.80 | 0.79 | 0.375307  | 0.76  | 1.04 | 1.06  | 0.95  | 0.242237    | 0.96 | 0.69 | 0.65 | 0.70 | 0.00597978 |
| APCD11  | Plate 02 | D21 | 147495 | NM_153000    | GCCCGAAGUUCUCCAGG  | 1.09 | 0.72 | 0.83 | 0.78 | 0.279011  | 0.88  | 0.80 | 1.11  | 0.93  | 0.1509999   | 0.73 | 0.85 | 0.65 | 0.75 | 1.03452    |
| ARL4D   | Plate 02 | E07 | 379    | NM_001661    | AAGCCAAAGGUGUUGU   | 0.78 | 1.06 | 1.05 | 1.06 | 0.0014419 | 1.11  | 1.38 | 0.91  | 1.14  | 0.4118999   | 1.06 | 1.08 | 1.28 | 1.14 | 1.274E-08  |
| ARL4D   | Plate 02 | F07 | 379    | NM_001661    | AGCGUUUGUUGGAGUA   | 0.51 | 0.78 | 0.62 | 0.64 | 1.568E-05 | 0.89  | 0.88 | 1.25  | 1.00  | 0.57373     | 0.77 | 0.54 | 0.53 | 0.62 | 4.267E-07  |
| ARL4D   | Plate 02 | G07 | 379    | NM_001661    | GCGCGUUGUUGGAGUA   | 0.75 | 0.85 | 0.66 | 0.71 | 1.107716  | 1.15  | 0.87 | 1.10  | 1.04  | 0.325196    | 0.58 | 0.87 | 0.53 | 0.66 | 0.0008111  |
| ARL4D   | Plate 02 | H07 | 379    | NM_001661    | GCGCGUUGUUGGAGUA   | 0.80 | 1.08 | 0.96 | 0.95 | 0.153871  | 0.88  | 0.86 | 0.82  | 0.72  | 2.628E-06   | 0.62 | 0.80 | 0.56 | 0.66 | 0.0001811  |
| BOK     | Plate 02 | M04 | 666    | NM_032515    | GCCCGAGGUCUCCGCA   | 0.95 | 1.01 | 0.82 | 0.93 | 0.211142  | 1.08  | 1.12 | 1.29  | 1.16  | 0.207529    | 0.93 | 0.92 | 0.85 | 0.90 | 0.081463   |
| BOK     | Plate 02 | N04 | 666    | NM_032515    | AGAAUGGAGCGCCUUGA  | 0.81 | 0.93 | 0.82 | 0.85 | 0.884478  | 0.69  | 0.77 | 0.80  | 0.75  | 0.0001387   | 0.65 | 0.44 | 0.45 | 0.51 | 5.233E-16  |
| BOK     | Plate 02 | O04 | 666    | NM_032515    | GAUGGAGUUGUUGGUA   | 0.92 | 0.91 | 0.68 | 0.84 | 0.820352  | 0.63  | 0.72 | 1.21  | 0.85  | 0.0489793   | 0.53 | 0.77 | 0.71 | 0.87 | 0.0004577  |
| BOK     | Plate 02 | P04 | 666    | NM_032515    | GAGAGCGCCCGAGCGUG  | 0.61 | 0.69 | 0.75 | 0.81 | 0.0194109 | 0.96  | 1.08 | 1.03  | 1.01  | 0.073866    | 0.67 | 0.66 | 0.77 | 0.70 | 0.0006281  |
| CABIN1  | Plate 02 | I20 | 23523  | NM_012295    | GAACACAGCCCGAGUAU  | 0.71 | 0.89 | 0.66 | 0.75 | 0.0991792 | 1.08  | 1.08 | 1.01  | 1.06  | 0.86937     | 0.79 | 0.85 | 0.90 | 0.85 | 0.5055     |
| CABIN1  | Plate 02 | J20 | 23523  | NM_012295    | GGAGGAGUUGGUGGCCA  | 1.16 | 1.13 | 1.01 | 1.10 | 0.002896  | 1.29  | 1.61 | 1.56  | 1.49  | 3.973E-05   | 1.05 | 1.08 | 0.88 | 0.90 | 0.0006697  |
| CABIN1  | Plate 02 | K20 | 23523  | NM_012295    | GGAGUUGUUGGUGGCCA  | 0.61 | 0.71 | 0.84 | 0.72 | 0.0230408 | 0.58  | 0.69 | 0.71  | 0.66  | 7.439E-08   | 0.53 | 0.59 | 0.76 | 0.93 | 0.94E-06   |
| CABIN1  | Plate 02 | L20 | 23523  | NM_012295    | GAUGGAGUUGGAGUAU   | 0.97 | 0.86 | 0.82 | 0.85 | 0.9367274 | 1.71  | 0.83 | 1.00  | 0.85  | 0.0101197   | 0.53 | 0.52 | 0.46 | 0.50 | 0.0987156  |
| CARD17  | Plate 02 | E05 | 440068 | NM_001007232 | UGACUUGUUAUUGGAGU  | 0.50 | 0.85 | 0.85 | 0.87 | 0.0000000 | 0.98  | 0.98 | 0.97  | 0.95  | 0.2598953   | 0.80 | 0.92 | 0.92 | 0.90 | 0.0558663  |
| CARD17  | Plate 02 | F05 | 440068 | NM_001007232 | GGUGUUAUUGGAGAGCA  | 0.37 | 0.89 | 1.41 | 0.89 | 0.246339  | 1.41  | 0.84 | 0.95  | 1.07  | 0.988233    | 0.61 | 0.89 | 1.14 | 0.88 | 0.423203   |
| CARD17  | Plate 02 | G05 | 440068 | NM_001007232 | UGACUUAUCCACAGAAU  | 1.09 | 1.30 | 1.32 | 1.24 | 1.937E-07 | 1.45  | 1.28 | 1.19  | 1.31  | 0.0089199   | 0.85 | 1.12 | 1.19 | 1.05 | 2.334E-05  |
| CARD17  | Plate 02 | H05 | 440068 | NM_001007232 | CCACGACUUAAGAGUAU  | 0.60 | 0.47 | 0.46 | 0.51 | 2.919E-12 | 0.53  | 0.68 | 0.79  | 0.67  | 7.771E-08   | 0.71 | 0.59 | 0.61 | 0.64 | 2.473E-05  |
| CDC127  | Plate 02 | J13 | 139957 | NM_145265    | AGAAUUGGAGUUGGUA   | 0.75 | 0.97 | 0.82 | 0.87 | 0.0241652 | 0.76  | 0.50 | 0.76  | 0.50  | 0.0000000   | 0.58 | 0.60 | 0.51 | 0.61 | 0.705E-05  |
| CDC127  | Plate 02 | B19 | 139957 | NM_145265    | UGAAUUAUCCGCGUAU   | 0.39 | 0.91 | 0.62 | 0.64 | 4.899E-06 | 0.84  | 0.80 | 0.89  | 0.85  | 0.0131815   | 0.53 | 0.73 | 0.59 | 0.62 | 1.192E-06  |
| CDC127  | Plate 02 | C19 | 139957 | NM_145265    | GAGCGAAUUGGUAAGA   | 0.75 | 0.82 | 0.74 | 0.77 | 0.212265  | 0.83  | 0.96 | 1.04  | 0.94  | 0.227307    | 0.90 | 0.84 | 0.84 | 0.86 | 0.343707   |
| CDC127  | Plate 02 | D19 | 139957 | NM_145265    | GGAAUUGGAGUUGGUA   | 0.85 | 0.79 | 0.94 | 0.86 | 0.807189  | 0.70  | 0.82 | 0.90  | 1.01  | 0.0022896   | 0.85 | 0.67 | 0.75 | 0.76 | 0.192542   |
| CENPL   | Plate 02 | I13 | 91687  | NM_033319    | GGAAUUGGAGUUGGUA   | 0.99 | 0.91 | 0.80 | 0.90 | 0.395434  | 0.83  | 1.06 | 1.10  | 1.00  | 0.547178    | 0.89 | 0.74 | 0.65 | 0.76 | 0.190448   |
| CENPL   | Plate 02 | J13 | 91687  | NM_033319    | AGAAUUGGAGUUGGUA   | 0.62 | 1.05 | 0.68 | 0.85 | 0.1793748 | 0.65  | 0.85 | 0.95  | 0.75  | 5.545E-05   | 0.58 | 0.90 | 0.91 | 0.73 | 0.010423   |
| CENPL   | Plate 02 | K13 | 91687  | NM_033319    | CAACAAUUGGAGUUGGUA | 0.85 | 1.02 | 0.77 | 0.84 | 0.892291  | 0.84  | 1.06 | 1.00  | 0.97  | 0.355384    | 0.76 | 0.76 | 0.71 | 0.75 | 0.165581   |
| CENPL   | Plate 02 | L13 | 91687  | NM_033319    | UUAUUGGAGUUGGUAU   | 0.82 | 0.90 | 0.84 | 0.96 | 0.10105   | 1.08  | 0.93 | 1.04  | 1.01  | 0.760764    | 0.78 | 0.81 | 0.75 | 0.77 | 0.389499   |
| CLIC3   | Plate 02 | M07 | 9022   | NM_004669    | GGAGAAAGUUGGAGUAU  | 0.57 | 0.70 | 0.54 | 0.60 | 3.085E-06 | 0.44  | 0.75 | 0.92  | 0.70  | 0.3022E-07  | 0.67 | 0.65 | 0.59 | 0.64 | 2.841E-05  |
| CLIC3   | Plate 02 | N07 | 9022   | NM_004669    | GCAAGUUGGAGUUGGUA  | 0.68 | 0.71 | 0.73 | 0.71 | 0.0156211 | 0.90  | 0.78 | 0.81  | 0.83  | 0.0074578   | 0.59 | 0.62 | 0.55 | 0.99 | 2.502E-08  |
| CLIC3   | Plate 02 | O07 | 9022   | NM_004669    | GCGAGUUGGAGUUGGUA  | 0.92 | 0.62 | 0.57 | 0.61 | 0.0000000 | 0.77  | 0.70 | 0.47  | 0.77  | 0.0000000   | 0.58 | 0.60 | 0.51 | 0.77 | 0.010423   |
| CLIC3   | Plate 02 | P07 | 9022   | NM_004669    | GCGAGUUGGAGUUGGUA  | 0.71 | 0.71 | 0.63 | 0.68 | 0.0038117 | 0.84  | 0.72 | 1.13  | 0.90  | 0.9501444   | 0.71 | 0.70 | 0.67 | 0.69 | 0.0065188  |
| CRYAA   | Plate 02 | E13 | 1409   | NM_000394    | GAAGUUGGAGUUGGUAU  | 0.87 | 1.03 | 1.08 | 1.00 | 0.0208023 | 0.72  | 0.90 | 1.04  | 0.89  | 0.0440796   | 0.75 | 0.64 | 0.70 | 0.70 | 0.0077138  |
| CRYAA   | Plate 02 | F13 | 1409   | NM_000394    | GGAGUUGGAGUUGGUAU  | 0.79 | 0.95 | 0.78 | 0.84 | 0.920232  | 0.93  | 0.93 | 0.88  | 0.85  | 0.0174225   | 0.81 | 1.07 | 0.95 | 1.01 | 0.0020408  |
| CRYAA   | Plate 02 | G13 | 1409   | NM_000394    | GCGAAUUGGAGUUGGUA  | 0.91 | 1.12 | 1.17 | 1.07 | 0.0165449 | 1.93  | 1.03 | 1.08  | 1.34  | 0.0122591   | 0.87 | 1.12 | 1.10 | 1.03 | 8.999E-05  |
| CRYAA   | Plate 02 | H13 | 1409   | NM_000394    | GAAGUUGGAGUUGGUAU  | 0.78 | 1.25 | 1.35 | 1.27 | 0.0000000 | 1.35  | 1.22 | 1.15  | 1.22  | 0.0000000   | 0.87 | 1.08 | 1.02 | 0.88 | 2.716E-07  |
| CXCL3   | Plate 02 | I06 | 2921   | NM_002090    | AUCCAAGUUGGAGUUA   | 0.88 | 0.90 | 0.86 | 0.88 | 0.554067  | 0.61  | 0.61 | 0.71  | 0.64  | 1.479E-08   | 0.33 | 0.22 | 0.25 | 0.27 | 0.0        |
| CXCL3   | Plate 02 | J06 | 2921   | NM_002090    | UCCAAGUUGGAGUUA    | 0.84 | 0.94 | 0.91 | 0.90 | 0.403188  | 1.08  | 1.10 | 1.03  | 1.07  | 0.754688    | 0.83 | 0.80 | 0.82 | 0.82 | 0.940978   |
| CXCL3   | Plate 02 | K06 | 2921   | NM_002090    | GAAUUGGAGUUGGUAU   | 0.79 | 0.89 | 0.71 | 0.80 | 0.407881  | 0.90  | 1.02 | 1.08  | 1.00  | 0.611418    | 0.74 | 0.84 | 0.82 | 0.81 | 0.998866   |
| CXCL3   | Plate 02 | L06 | 2921   | NM_002090    | GAUGGAGUUGGAGUUA   | 0.72 | 0.91 | 0.78 | 0.80 | 0.472024  | 0.88  | 0.80 | 0.82  | 0.83  | 0.0087448   | 0.86 | 0.88 | 0.95 | 0.90 | 0.0987444  |
| CYBASC3 | Plate 02 | E08 | 220002 | NM_153811    | GGAGUUGGAGUUGGUAU  | 0.81 | 0.89 | 0.72 | 0.87 | 0.0069862 | 0.89  | 0.80 | 0.72  | 0.84  | 0.0000000</ |      |      |      |      |            |

|         |          |     |        |              |                     |      |      |      |      |           |      |      |      |      |           |      |      |      |      |            |
|---------|----------|-----|--------|--------------|---------------------|------|------|------|------|-----------|------|------|------|------|-----------|------|------|------|------|------------|
| LXL1L   | Plate 02 | M03 | 128077 | NM_153713    | GAAGGUGACACCAAAUA   | 0.98 | 1.01 | 0.97 | 0.99 | 0.0307932 | 0.81 | 1.12 | 1.14 | 1.03 | 0.731317  | 0.81 | 0.92 | 1.08 | 0.93 | 0.0219693  |
| LXL1L   | Plate 02 | N03 | 128077 | NM_153713    | GUGUUGGUCUUAUUUUG   | 0.79 | 0.95 | 0.77 | 0.84 | 0.879066  | 0.85 | 1.05 | 1.28 | 1.06 | 0.964438  | 0.73 | 0.69 | 0.63 | 0.69 | 0.0028025  |
| LXL1L   | Plate 02 | N03 | 128077 | NM_153713    | CAACGAGGAGGUCGCGG   | 0.96 | 0.80 | 0.61 | 0.61 | 0.0502263 | 0.96 | 0.94 | 1.01 | 1.00 | 0.982926  | 0.59 | 0.69 | 0.59 | 0.56 | 0.0015885  |
| LXL1L   | Plate 02 | N03 | 128077 | NM_153713    | CUIUUAUGUUGCUUAUGCA | 0.91 | 0.78 | 0.85 | 0.84 | 0.969896  | 0.87 | 1.05 | 0.88 | 0.87 | 0.910542  | 0.86 | 0.57 | 0.73 | 0.72 | 0.0210534  |
| LMN1B1  | Plate 02 | E04 | 4001   | NM_005573    | GAAGGAUUCGUAUCUUAU  | 0.69 | 0.62 | 0.62 | 0.64 | 0.0020025 | 0.72 | 0.92 | 0.98 | 0.87 | 0.9308244 | 0.67 | 0.71 | 0.69 | 0.69 | 0.0051578  |
| LMN1B1  | Plate 02 | F04 | 4001   | NM_005573    | CAACUACGUCUUCUGGAA  | 0.84 | 1.25 | 1.20 | 1.09 | 0.0007079 | 1.19 | 1.03 | 1.65 | 1.29 | 0.0231076 | 0.75 | 0.76 | 0.92 | 0.81 | 0.888347   |
| LMN1B1  | Plate 02 | G04 | 4001   | NM_005573    | GAAGAGGUCUAGGACAU   | 0.83 | 1.12 | 1.13 | 1.03 | 0.0101662 | 1.06 | 0.97 | 1.09 | 1.04 | 0.97602   | 0.86 | 1.00 | 0.99 | 0.80 | 0.0090921  |
| LMN1B1  | Plate 02 | H04 | 4001   | NM_005573    | CCACAAACGUCUUAUUA   | 0.74 | 0.74 | 0.99 | 1.02 | 0.0000236 | 0.99 | 1.01 | 0.99 | 1.01 | 0.982396  | 0.62 | 0.64 | 0.57 | 0.60 | 2.70951-07 |
| LPN2    | Plate 02 | J22 | 23266  | NM_012302    | GAAGGUGGUCUACAAUUG  | 0.74 | 0.84 | 0.92 | 0.83 | 0.836122  | 1.42 | 0.91 | 1.57 | 1.30 | 0.0223791 | 0.62 | 0.62 | 0.94 | 0.73 | 0.0242422  |
| LPN2    | Plate 02 | J22 | 23266  | NM_012302    | GCCAAAGACUUAUUAUUG  | 0.67 | 0.74 | 0.68 | 0.70 | 0.0087839 | 1.07 | 1.01 | 1.11 | 1.06 | 0.814191  | 0.83 | 0.75 | 0.77 | 0.78 | 0.156341   |
| LPN2    | Plate 02 | K22 | 23266  | NM_012302    | GAAGAACGAGGAAUUAUG  | 0.69 | 0.80 | 0.84 | 0.78 | 0.244107  | 1.24 | 1.05 | 1.12 | 1.14 | 0.319055  | 0.70 | 0.74 | 0.78 | 0.74 | 0.105599   |
| LPN2    | Plate 02 | L22 | 23266  | NM_012302    | CCACAAACGUCUUAUUA   | 0.89 | 1.06 | 0.87 | 0.94 | 0.148893  | 1.74 | 0.85 | 1.37 | 0.99 | 0.291519  | 0.76 | 0.66 | 0.61 | 0.75 | 0.0414687  |
| LRRC16B | Plate 02 | J07 | 90668  | NM_138360    | CAACAAACGUCUUAUUA   | 0.71 | 0.98 | 0.79 | 0.73 | 0.0420171 | 0.82 | 1.58 | 1.19 | 0.99 | 0.0429599 | 0.74 | 0.52 | 0.56 | 0.59 | 0.0223608  |
| LRRC16B | Plate 02 | J07 | 90668  | NM_138360    | CAACAAACGUCUUAUUA   | 0.56 | 0.63 | 0.53 | 0.57 | 1.0827-07 | 0.56 | 1.06 | 0.83 | 0.82 | 0.021181  | 0.78 | 0.67 | 0.65 | 0.70 | 0.0025676  |
| LRRC16B | Plate 02 | K07 | 90668  | NM_138360    | AAACGAGCUCUUAUUA    | 1.07 | 1.13 | 0.99 | 1.06 | 0.0015403 | 1.72 | 1.31 | 1.58 | 1.54 | 7.9955-06 | 1.12 | 1.22 | 1.04 | 1.13 | 3.477E-08  |
| LRRC16B | Plate 02 | L07 | 90668  | NM_138360    | AAACGAGCUCUUAUUA    | 1.46 | 0.95 | 1.01 | 1.14 | 0.0010222 | 0.68 | 2.68 | 1.25 | 1.53 | 0.0088117 | 1.11 | 1.02 | 1.05 | 1.06 | 0.683E-06  |
| MAFG    | Plate 02 | A18 | 4097   | NM_032711    | CGAGGAGCUCUUAUUA    | 1.14 | 0.83 | 1.18 | 1.05 | 0.004385  | 0.54 | 0.76 | 0.11 | 0.47 | 4.236E-36 | 0.85 | 0.50 | 0.46 | 0.61 | 9.706E-09  |
| MAFG    | Plate 02 | B18 | 4097   | NM_032711    | UCGAAUUAUUAUUAUUA   | 0.55 | 0.96 | 0.57 | 0.62 | 1.949E-05 | 0.56 | 0.57 | 0.63 | 0.59 | 1.726E-11 | 0.43 | 0.82 | 0.47 | 0.51 | 1.741E-09  |
| MAFG    | Plate 02 | C18 | 4097   | NM_032711    | UCAGAAACGCGAGCAU    | 1.06 | 1.94 | 2.63 | 1.88 | 9.092E-24 | 1.03 | 0.53 | 3.34 | 1.63 | 0.0618228 | 0.87 | 2.09 | 1.69 | 1.55 | 4.738E-23  |
| MAFG    | Plate 02 | D18 | 4097   | NM_032711    | CCAUUGGACGUGGAAUUA  | 0.75 | 0.63 | 0.79 | 0.72 | 0.0311325 | 0.62 | 0.99 | 0.75 | 0.79 | 0.0046665 | 0.77 | 0.66 | 0.63 | 0.69 | 0.003017   |
| NYFB    | Plate 02 | A20 | 4801   | NM_006166    | GUUACGAGCUCUUAUUA   | 0.46 | 0.59 | 0.69 | 0.58 | 1.124E-07 | 0.33 | 0.41 | 0.54 | 0.43 | 1.388E-28 | 0.23 | 0.24 | 0.18 | 0.22 | 0.0        |
| NYFB    | Plate 02 | B20 | 4801   | NM_006166    | GUUUAUUCUUAUUAUUA   | 0.69 | 0.67 | 0.63 | 0.73 | 0.0424118 | 0.33 | 0.63 | 0.73 | 0.60 | 0.0070744 | 0.34 | 0.61 | 0.41 | 0.45 | 1.401E-25  |
| NYFB    | Plate 02 | C20 | 4801   | NM_006166    | UAAGGUGUCUUAUUAUUA  | 0.58 | 0.75 | 0.54 | 0.62 | 1.949E-05 | 0.78 | 0.65 | 1.13 | 0.85 | 0.0081338 | 0.50 | 0.46 | 0.33 | 0.43 | 1.265E-28  |
| NYFB    | Plate 02 | D20 | 4801   | NM_006166    | GAAGGUGUCUUAUUAUUA  | 0.49 | 0.43 | 0.50 | 0.47 | 2.168E-15 | 0.64 | 0.84 | 0.78 | 0.75 | 0.0011119 | 0.23 | 0.22 | 0.25 | 0.23 | 0.0        |
| OAT     | Plate 02 | E03 | 4942   | NM_000274    | UAAGCUGUUGGUAUUAU   | 0.64 | 0.91 | 0.63 | 0.73 | 0.0254894 | 1.04 | 0.71 | 1.52 | 1.09 | 0.95054   | 0.77 | 0.91 | 0.65 | 0.78 | 0.347843   |
| OAT     | Plate 02 | F03 | 4942   | NM_000274    | GGUAGGAGCUGUUGGUA   | 0.77 | 0.87 | 0.86 | 0.83 | 0.862373  | 0.96 | 1.02 | 0.86 | 0.95 | 0.252379  | 0.92 | 0.74 | 0.67 | 0.78 | 0.352213   |
| OAT     | Plate 02 | G03 | 4942   | NM_000274    | CCAUUUAUUAUUAUUAU   | 0.69 | 0.99 | 0.71 | 0.66 | 0.0080952 | 0.80 | 0.61 | 0.71 | 0.73 | 1.524E-05 | 0.95 | 0.51 | 0.62 | 0.56 | 1.561E-10  |
| OAT     | Plate 02 | H03 | 4942   | NM_000274    | GCCAUUUAUUAUUAUUA   | 0.69 | 0.71 | 0.52 | 0.63 | 0.075E-05 | 0.62 | 0.71 | 0.62 | 0.62 | 0.075E-05 | 0.61 | 0.68 | 0.52 | 0.68 | 2.265E-08  |
| OR2     | Plate 02 | E18 | 26707  | NM_030905    | GUAGUUCUUAUUAUUAU   | 0.93 | 0.99 | 0.93 | 0.95 | 0.101661  | 0.93 | 0.78 | 0.98 | 0.90 | 0.0710614 | 0.67 | 0.75 | 0.65 | 0.69 | 0.00473    |
| OR2     | Plate 02 | F18 | 26707  | NM_030905    | CAGAAGUUAUUAUUAUUA  | 0.74 | 0.75 | 0.66 | 0.72 | 0.0249919 | 0.75 | 0.80 | 0.96 | 0.83 | 0.0086524 | 0.91 | 0.63 | 0.73 | 0.80 | 0.0036492  |
| OR2     | Plate 02 | G18 | 26707  | NM_030905    | UAUUCUUAUUAUUAUUA   | 0.79 | 0.69 | 0.71 | 0.73 | 0.0465866 | 0.59 | 0.96 | 0.76 | 0.77 | 0.0012291 | 0.70 | 0.76 | 0.73 | 0.69 | 0.0036492  |
| OR2     | Plate 02 | H18 | 26707  | NM_030905    | CCAUUUAUUAUUAUUAU   | 1.21 | 0.92 | 1.04 | 1.04 | 0.0257333 | 0.82 | 0.97 | 1.04 | 0.92 | 0.0423398 | 1.02 | 1.04 | 0.92 | 0.94 | 0.0073466  |
| ORS2E2  | Plate 02 | M05 | 119678 | NM_001005164 | GAAGGAGCUCUUAUUAU   | 1.06 | 0.67 | 1.00 | 0.81 | 0.433838  | 0.91 | 1.22 | 0.98 | 1.04 | 0.884471  | 0.81 | 0.53 | 0.64 | 0.66 | 0.001143   |
| ORS2E2  | Plate 02 | N05 | 119678 | NM_001005164 | GUCUUAUUAUUAUUAUUA  | 0.73 | 0.90 | 0.73 | 0.79 | 0.312258  | 1.60 | 0.89 | 0.39 | 0.96 | 0.0056441 | 0.78 | 0.68 | 0.65 | 0.70 | 0.017905   |
| ORS2E2  | Plate 02 | O05 | 119678 | NM_001005164 | GCAUUAUUAUUAUUAUUA  | 0.54 | 0.48 | 0.52 | 0.51 | 9.98E-12  | 0.52 | 0.75 | 0.71 | 0.66 | 4.233E-08 | 0.21 | 0.18 | 0.18 | 0.19 | 0.0        |
| ORS2E2  | Plate 02 | P05 | 119678 | NM_001005164 | CCAUUAUUAUUAUUAUUA  | 0.89 | 0.81 | 0.87 | 0.85 | 0.828988  | 0.24 | 0.58 | 0.59 | 0.47 | 1.685E-24 | 1.00 | 0.69 | 0.77 | 0.82 | 0.949196   |
| PAQR7   | Plate 02 | J04 | 164091 | NM_178422    | ACCAUUAUUAUUAUUAU   | 0.72 | 0.98 | 0.79 | 0.73 | 0.0420171 | 0.82 | 1.58 | 1.19 | 0.99 | 0.0429599 | 0.74 | 0.52 | 0.56 | 0.59 | 0.0223608  |
| PAQR7   | Plate 02 | K04 | 164091 | NM_178422    | UAACGAGCUCUUAUUAU   | 0.78 | 0.85 | 0.82 | 0.82 | 0.66143   | 1.33 | 0.75 | 1.23 | 1.10 | 0.747655  | 0.47 | 0.56 | 0.60 | 0.54 | 3.754E-12  |
| PAQR7   | Plate 02 | L04 | 164091 | NM_178422    | CCACAGGAGCUCUUAUUA  | 0.77 | 0.90 | 0.61 | 0.76 | 0.112489  | 0.68 | 0.82 | 0.87 | 0.79 | 0.0009841 | 0.82 | 0.73 | 0.68 | 0.75 | 0.114975   |
| PAQR7   | Plate 02 | M04 | 164091 | NM_178422    | GUACAGGACCAUUAUUAU  | 0.61 | 0.78 | 0.74 | 0.71 | 0.0154283 | 0.84 | 0.84 | 0.96 | 0.93 | 0.176137  | 0.57 | 0.79 | 0.74 | 0.70 | 0.006892   |
| PARF2   | Plate 02 | E22 | 10038  | NM_001042618 | AAGGAGCUCUUAUUAUUA  | 0.47 | 0.80 | 0.54 | 0.60 | 7.867E-07 | 0.82 | 0.89 | 0.72 | 0.81 | 0.0204891 | 0.76 | 1.02 | 0.69 | 0.82 | 0.978627   |
| PARF2   | Plate 02 | F22 | 10038  | NM_001042618 | CCAUUUAUUAUUAUUAU   | 0.76 | 0.92 | 0.70 | 0.59 | 0.355871  | 0.92 | 0.92 | 0.99 | 0.91 | 0.0423398 | 0.90 | 0.80 | 0.80 | 0.83 | 0.6941     |
| PARF2   | Plate 02 | G22 | 10038  | NM_001042618 | GCCAGGAGCUCUUAUUAU  | 0.51 | 0.77 | 0.79 | 0.79 | 0.374923  | 0.73 | 0.88 | 0.68 | 0.76 | 0.0002125 | 0.66 | 0.81 | 0.62 | 0.63 | 1.361E-05  |
| PARF2   | Plate 02 | H22 | 10038  | NM_001042618 | ACAUUUAUUAUUAUUAU   | 0.87 | 0.61 | 0.71 | 0.63 | 0.262E-05 | 0.84 | 1.00 | 0.83 | 0.89 | 0.0598833 | 0.85 | 0.61 | 0.62 | 0.84 | 0.524668   |
| PATE1   | Plate 02 | M19 | 160065 | NM_138294    | GAUCGUGCUCUUAUUAU   | 0.72 | 0.69 | 0.76 | 0.72 | 0.035453  | 0.72 | 0.95 | 1.00 | 0.86 | 0.0179692 | 0.54 | 0.55 | 0.59 | 0.59 | 2.065E-10  |
| PATE1   | Plate 02 | N19 | 160065 | NM_138294    | GAAGGAGCUCUUAUUAU   | 0.74 | 1.15 | 0.85 | 0.91 | 0.386248  | 1.02 | 1.02 | 0.98 | 0.93 | 0.136753  | 0.69 | 0.77 | 0.62 | 0.69 | 0.0054901  |
| PATE1   | Plate 02 | P19 | 160065 | NM_138294    | GCCAUUUAUUAUUAUUAU  | 0.79 | 0.79 | 0.82 | 0.81 | 0.059117  | 0.97 | 1.17 | 1.05 | 0.91 | 0.714163  | 0.90 | 0.75 | 0.62 | 0.82 | 0.0271322  |
| PATE1   | Plate 02 | M19 | 160065 | NM_138294    | GAUUGGAGCUCUUAUUAU  | 0.69 | 0.82 | 0.93 | 0.81 | 0.557142  | 0.89 | 0.74 | 1.04 | 0.89 | 0.051168  | 0.54 | 0.52 | 0.63 | 0.56 | 2.928E-10  |
| PITHD1  | Plate 02 | M15 | 57095  | NM_020362    | GAUAGGAGCUCUUAUUAU  | 0.78 | 0.85 | 0.89 | 0.84 | 0.949153  | 0.70 | 0.85 | 0.79 | 0.78 | 0.0006308 | 0.74 | 0.78 | 0.84 | 0.78 | 0.508492   |
| PITHD1  | Plate 02 | N15 | 57095  | NM_020362    | GGUUAUUAUUAUUAUUAU  | 0.45 | 0.85 | 0.74 | 0.68 | 0.0008283 | 0.52 | 0.59 | 0.63 | 0.58 | 0.300612  | 0.33 | 0.44 | 0.51 | 0.43 | 2.67E-29   |
| PITHD1  | Plate 02 | G15 | 57095  | NM_020362    | CCAUUUAUUAUUAUUAU   | 0.74 | 0.72 | 0.71 | 0.88 | 0.709429  | 0.56 | 0.98 | 0.52 | 1.45 | 0.509E-07 | 0.95 | 0.65 | 0.80 | 0.88 | 0.010491   |
| PITHD1  | Plate 02 | P15 | 57095  | NM_020362    | GACGAGGAGCUCUUAUUAU | 0.78 | 0.77 | 0.89 | 0.83 | 0.902816  | 0.63 | 0.69 | 0.62 | 0.62 | 0.002816  | 0.67 | 0.64 | 0.66 | 0.64 | 0.000854   |
| PKMYT1  | Plate 02 | J11 | 9088   | NM_004203    | GUUAAGGUCUUAUUAUUA  | 1.03 | 0.88 | 0.63 | 0.75 | 0.0740097 | 1.08 | 0.61 | 0.73 | 0.80 | 0.0008721 | 0.68 | 0.82 | 0.57 | 0.69 | 0.0028856  |
| PKMYT1  | Plate 02 | K11 | 9088   | NM_004203    | CCACGAGCUCUUAUUAU   | 0.73 | 1.04 | 0.78 | 0.95 | 0.12726   | 1.14 | 0.77 | 1.33 | 1.08 | 0.897162  | 1.02 | 0.83 | 0.70 | 0.85 | 0.579121   |
| PKMYT1  | Plate 02 | L11 | 9088   | NM_004203    | GCGGAGCUCUUAUUAUUA  | 0.79 | 0.81 | 0.84 | 0.81 | 0.624238  | 1.21 | 0.79 | 1.01 | 1.00 | 0.546084  | 0.87 | 0.67 | 0.64 | 0.71 | 0.0029287  |
| PKMYT1  | Plate 02 | M11 | 9088   | NM_004203    | ACGAGGAGCUCUUAUUAU  | 0.81 | 0.91 | 0.83 | 0.84 | 0.896588  | 1.02 | 1.05 | 0.96 | 1.01 | 0.714163  | 0.90 | 0.75 | 0.62 | 0.82 | 0.0271322  |
| PNMA5   | Plate 02 | M08 | 114824 | NM_001103151 | GAUAGGAGCUCUUAUUAU  | 0.78 | 0.73 | 0.89 | 0.72 | 0.027392  | 0.92 | 0.92 | 0.99 | 0.78 | 0.0703232 | 0.69 | 0.74 | 0.77 | 0.77 | 0.00703232 |

|          |          |     |        |             |                        |        |      |      |      |           |      |      |      |      |           |      |      |      |           |           |
|----------|----------|-----|--------|-------------|------------------------|--------|------|------|------|-----------|------|------|------|------|-----------|------|------|------|-----------|-----------|
| TRAF7    | Plate 02 | L05 | 84231  | NM_032271   | AGACCACCGUGAGACUUG     | 0.79   | 1.08 | 1.06 | 0.98 | 0.0592018 | 0.73 | 0.86 | 0.76 | 0.78 | 0.0007802 | 0.46 | 0.60 | 0.58 | 0.54      | 6.46E-12  |
| TRAF7    | Plate 02 | A13 | 55223  | NM_018207   | CUACAAUCGUGUAGACACUUG  | 0.57   | 0.77 | 1.16 | 0.84 | 0.0349863 | 0.66 | 0.80 | 0.64 | 0.70 | 2.54E-06  | 0.29 | 0.41 | 0.52 | 0.41      | 1.504E-34 |
| TRAF7    | Plate 02 | C13 | 55223  | NM_018207   | GAUACACAGUCGUGUAGACUUG | 0.52   | 0.62 | 0.94 | 0.67 | 0.0456073 | 0.62 | 0.73 | 0.58 | 0.62 | 0.0041161 | 0.32 | 0.45 | 0.56 | 0.54      | 1.852E-36 |
| TRAF7    | Plate 02 | E13 | 55223  | NM_018207   | UCCGACAGUCGUGUAGACUUG  | 0.77   | 0.79 | 1.04 | 0.90 | 0.4652905 | 0.68 | 0.83 | 1.08 | 0.96 | 0.330138  | 0.74 | 0.76 | 0.66 | 0.72      | 0.0357786 |
| TRAF7    | Plate 02 | D10 | 55223  | NM_018207   | CGCCAAAGCGUGUAGACUUG   | 0.78   | 0.87 | 0.66 | 0.77 | 0.185776  | 0.71 | 0.97 | 0.63 | 0.77 | 0.0019114 | 0.73 | 0.81 | 0.71 | 0.75      | 0.161239  |
| TRP4     | Plate 02 | E10 | 59341  | NM_021625   | GCACACCGCGUAGACUUG     | 0.59   | 0.48 | 0.69 | 0.59 | 3.203E-07 | 0.70 | 0.90 | 0.91 | 0.84 | 0.0081978 | 0.79 | 0.87 | 0.93 | 0.87      | 0.322028  |
| TRP4     | Plate 02 | F10 | 59341  | NM_021625   | GACCAAAUCGUGUAGACUUG   | 1.13   | 1.28 | 1.15 | 1.19 | 3.02E-06  | 1.31 | 1.27 | 1.06 | 1.21 | 0.0622859 | 1.29 | 1.34 | 1.11 | 1.25      | 5.27E-13  |
| TRP4     | Plate 02 | H10 | 59341  | NM_021625   | CGCCGCGUAGUAGUAGUUG    | 0.93   | 0.69 | 1.17 | 0.82 | 0.0022014 | 1.20 | 0.94 | 1.10 | 0.84 | 0.0041161 | 0.84 | 1.11 | 0.79 | 0.84      | 0.0205590 |
| TRP4     | Plate 02 | I10 | 59341  | NM_021625   | GAAACCGUGUGUAGACUUG    | 0.96   | 0.88 | 0.82 | 0.89 | 0.5035448 | 1.05 | 0.95 | 1.21 | 1.07 | 0.795638  | 0.90 | 0.94 | 0.76 | 0.87      | 0.300607  |
| UBL3     | Plate 02 | J09 | 5412   | NM_007106   | GAGAGUAAUUGUGUUGUUA    | 0.83   | 0.49 | 0.57 | 0.63 | 1.485E-05 | 0.50 | 0.66 | 0.69 | 0.62 | 4.284E-10 | 0.64 | 0.65 | 0.41 | 0.67      | 1.493E-05 |
| UBL3     | Plate 02 | K09 | 5412   | NM_007106   | CCAAUUAUUCUAGCAGUUA    | 0.83   | 0.80 | 0.76 | 0.80 | 0.436491  | 0.55 | 0.63 | 0.61 | 0.60 | 6.429E-11 | 0.75 | 0.70 | 0.72 | 0.72      | 0.0459107 |
| UBL3     | Plate 02 | A09 | 5412   | NM_007106   | CGCCGCGUAGUAGUAGUUG    | 0.85   | 0.80 | 0.69 | 0.77 | 0.266986  | 0.96 | 1.06 | 1.19 | 1.07 | 0.785778  | 0.79 | 0.66 | 0.58 | 0.68      | 0.010732  |
| UBL3     | Plate 02 | J09 | 5412   | NM_007106   | CGCCGCGUAGUAGUAGUUG    | 0.66   | 0.67 | 0.76 | 0.67 | 0.0368983 | 0.61 | 0.67 | 0.67 | 0.61 | 0.0233366 | 0.61 | 0.69 | 0.76 | 0.73      | 0.0085959 |
| UGT2B4   | Plate 02 | A05 | 7363   | NM_021139   | CGCCAAUCUAGUUAUUAUUA   | 0.65   | 0.74 | 0.66 | 0.68 | 0.0037003 | 0.65 | 1.07 | 0.96 | 0.90 | 0.0404031 | 0.71 | 0.83 | 0.75 | 0.76      | 0.207336  |
| UGT2B4   | Plate 02 | B05 | 7363   | NM_021139   | UAAGAGAUGGCGAGAACUUA   | 1.25   | 1.42 | 0.99 | 1.22 | 8.645E-07 | 0.90 | 0.65 | 1.35 | 0.97 | 0.163044  | 0.78 | 0.67 | 0.55 | 0.67      | 0.000383  |
| UGT2B4   | Plate 02 | C05 | 7363   | NM_021139   | GUACAGAAAUCUAGUUGUA    | 0.63   | 0.74 | 0.63 | 0.67 | 0.0011528 | 0.80 | 0.73 | 0.87 | 0.73 | 2.273E-05 | 0.71 | 0.78 | 0.70 | 0.73      | 0.063873  |
| UGT2B4   | Plate 02 | D05 | 7363   | NM_021139   | GGGAACCCACUAGUAGUUG    | 0.83   | 1.07 | 0.77 | 0.89 | 0.514594  | 0.85 | 0.89 | 1.09 | 0.94 | 0.219927  | 0.78 | 0.90 | 0.80 | 0.82      | 0.802943  |
| USP9     | Plate 02 | A22 | 84640  | NM_032557   | CGAAUAGUAGUAGUAGUUG    | 0.59   | 0.89 | 1.10 | 0.69 | 0.0261104 | 0.41 | 0.70 | 1.54 | 0.88 | 0.0020541 | 1.00 | 1.23 | 0.79 | 1.05      | 3.157E-08 |
| USP9     | Plate 02 | B22 | 84640  | NM_032557   | GGAGACAGUUAUUAUUAUUA   | 0.71   | 0.83 | 0.75 | 0.76 | 0.166433  | 0.86 | 0.76 | 0.93 | 0.85 | 0.0157068 | 0.78 | 0.76 | 0.74 | 0.76      | 0.249415  |
| USP9     | Plate 02 | C22 | 84640  | NM_032557   | GUCCGAAGUUAUUAUUAUUA   | 0.91   | 0.81 | 0.57 | 0.76 | 0.106229  | 1.06 | 0.80 | 0.85 | 0.74 | 4.094E-05 | 0.82 | 0.59 | 0.65 | 0.69      | 0.0023659 |
| USP9     | Plate 02 | D22 | 84640  | NM_032557   | GCAAUAGUAGUAGUAGUUG    | 0.70   | 0.78 | 0.84 | 0.76 | 0.182418  | 1.08 | 0.97 | 0.97 | 1.00 | 0.62774   | 0.71 | 0.73 | 0.84 | 0.76      | 0.23224   |
| XKRY2    | Plate 02 | I08 | 35315  | NM_00102906 | GACUUAUCGUGUAGUUGUUA   | 0.50   | 0.79 | 0.76 | 0.81 | 0.641394  | 0.85 | 0.96 | 0.75 | 0.85 | 0.0130663 | 1.02 | 0.93 | 0.91 | 0.95      | 0.007181  |
| XKRY2    | Plate 02 | J08 | 35315  | NM_00102906 | CGACUUAUCGUGUAGUUGUUA  | 0.64   | 0.91 | 0.67 | 0.74 | 0.0508498 | 0.61 | 0.94 | 0.92 | 0.82 | 0.0029562 | 0.73 | 0.53 | 0.67 | 0.61      | 0.001688  |
| XKRY2    | Plate 02 | L08 | 35315  | NM_00102906 | GGUUAUUGUAGUUGUUGUUA   | 0.81   | 0.89 | 0.80 | 0.84 | 0.866349  | 1.16 | 1.07 | 1.27 | 1.04 | 0.722903  | 0.87 | 1.01 | 0.88 | 0.92      | 0.039204  |
| ZNF367   | Plate 02 | E12 | 195828 | NM_153695   | GAGAAUCGUGUAGUUGUUG    | 0.84   | 1.20 | 0.83 | 0.95 | 0.125763  | 0.93 | 0.67 | 0.92 | 0.84 | 0.0081899 | 0.66 | 0.74 | 0.75 | 0.72      | 0.0296824 |
| ZNF367   | Plate 02 | F12 | 195828 | NM_153695   | GCACAAUCGUGUAGUUGUUG   | 1.40   | 1.00 | 0.74 | 0.85 | 0.0002111 | 1.28 | 1.11 | 1.20 | 1.20 | 0.101368  | 1.61 | 1.30 | 0.82 | 1.04      | 4.526E-11 |
| ZNF367   | Plate 02 | G12 | 195828 | NM_153695   | GAUUAUCGUGUAGUUGUUG    | 0.96   | 0.76 | 0.83 | 0.83 | 0.946352  | 0.76 | 0.57 | 0.78 | 0.84 | 0.0104649 | 0.51 | 0.76 | 0.69 | 0.60      | 0.001387  |
| ZNF367   | Plate 02 | H12 | 195828 | NM_153695   | CGAAUUAUCGUGUAGUUGUUG  | 0.92   | 1.11 | 0.71 | 0.91 | 0.380391  | 0.77 | 0.78 | 0.91 | 0.82 | 0.0046527 | 0.64 | 0.64 | 0.54 | 0.60      | 4.758E-07 |
| ZNF596   | Plate 02 | I17 | 169270 | NM_173539   | GAAUUAUCGUGUAGUUGUUG   | 0.77   | 0.90 | 0.84 | 0.84 | 0.89947   | 1.23 | 0.71 | 0.90 | 0.95 | 0.154745  | 0.70 | 0.70 | 0.75 | 0.76      | 0.18416   |
| ZNF596   | Plate 02 | J17 | 169270 | NM_173539   | GAUUAUCGUGUAGUUGUUG    | 0.79   | 1.20 | 1.02 | 1.00 | 0.0283533 | 0.83 | 0.97 | 0.91 | 0.90 | 0.0194193 | 0.69 | 0.88 | 0.87 | 0.81      | 0.922343  |
| ZNF596   | Plate 02 | K17 | 169270 | NM_173539   | GAUUAUCGUGUAGUUGUUG    | 0.67   | 0.92 | 0.92 | 0.76 | 8.22E-06  | 1.47 | 1.47 | 1.07 | 1.52 | 0.293366  | 0.74 | 0.64 | 0.79 | 0.64      | 1.98E-09  |
| ZNF596   | Plate 02 | L17 | 169270 | NM_173539   | CGACUUAUCGUGUAGUUGUUG  | 0.60   | 0.55 | 0.78 | 0.64 | 0.0010167 | 0.60 | 0.80 | 0.65 | 0.68 | 5.295E-07 | 0.62 | 0.55 | 0.68 | 0.60      | 5.11E-08  |
| AXTZL1   | Plate 03 | M17 | 64850  | NM_031279   | GAAGAAGCCACAUAGUUA     | 0.81   | 0.80 | 1.01 | 0.87 | 0.533744  | 0.95 | 0.78 | 0.83 | 0.85 | 0.0515599 | 0.62 | 0.81 | 0.57 | 0.67      | 0.001526  |
| AXTZL1   | Plate 03 | N17 | 64850  | NM_031279   | GAUUAUCGUGUAGUUGUUG    | 0.81   | 0.88 | 0.93 | 0.87 | 0.490605  | 1.21 | 0.77 | 1.04 | 1.01 | 0.869979  | 0.75 | 0.93 | 1.04 | 0.91      | 0.138786  |
| AXTZL1   | Plate 03 | O17 | 64850  | NM_031279   | GCUUUGGUGUAGUUGUUGUUG  | 0.77   | 0.97 | 1.06 | 0.93 | 0.139756  | 1.79 | 0.83 | 0.78 | 0.80 | 0.0074749 | 0.76 | 0.82 | 0.83 | 0.81      | 0.668727  |
| ANO10    | Plate 03 | P19 | 54129  | NM_018075   | GUAUUAUCGUGUAGUUGUUG   | 0.56   | 0.79 | 0.92 | 0.78 | 0.0261104 | 0.55 | 0.89 | 1.09 | 0.92 | 0.0763631 | 0.76 | 0.89 | 0.76 | 0.74      | 0.0453975 |
| ANO10    | Plate 03 | E06 | 55129  | NM_018075   | GACUUAUCGUGUAGUUGUUG   | 0.72   | 0.99 | 1.11 | 0.94 | 0.136523  | 0.81 | 0.56 | 0.83 | 0.74 | 0.000105  | 0.68 | 0.60 | 0.86 | 0.71      | 0.00843   |
| ANO10    | Plate 03 | F06 | 55129  | NM_018075   | GAUUAUCGUGUAGUUGUUG    | 0.79   | 0.92 | 1.17 | 0.76 | 0.22553   | 0.98 | 0.90 | 0.99 | 0.95 | 0.5668    | 0.74 | 0.72 | 0.75 | 0.74      | 0.0581365 |
| ANO10    | Plate 03 | G06 | 55129  | NM_018075   | GAUUAUCGUGUAGUUGUUG    | 0.90   | 0.75 | 0.61 | 0.75 | 0.135058  | 0.78 | 0.67 | 0.77 | 0.74 | 0.0020298 | 0.65 | 0.67 | 0.54 | 0.62      | 9.5E-07   |
| ANO10    | Plate 03 | H06 | 55129  | NM_018075   | GACUUAUCGUGUAGUUGUUG   | 0.83   | 0.83 | 3.51 | 1.72 | 4.388E-11 | 0.97 | 0.80 | 1.61 | 1.13 | 0.403818  | 1.07 | 1.02 | 1.36 | 1.15      | 2.978E-06 |
| ADP6     | Plate 03 | I19 | 363    | NM_001652   | CGCUGUAGUAGUUGUAGUUG   | 0.67   | 0.72 | 0.99 | 0.68 | 0.0021102 | 0.68 | 0.68 | 0.92 | 0.70 | 0.02766   | 0.66 | 0.69 | 0.66 | 0.60      | 0.001387  |
| ADP6     | Plate 03 | F19 | 363    | NM_001652   | CCACGACUUCUCCUCCUGU    | 0.87   | 0.51 | 2.16 | 1.18 | 0.0180582 | 0.67 | 1.21 | 1.26 | 1.05 | 0.955111  | 1.17 | 0.81 | 2.75 | 1.58      | 2.32E-18  |
| ADP6     | Plate 03 | G19 | 363    | NM_001652   | GACGAGCCUUCUCCUCCUGU   | 0.59   | 0.70 | 0.70 | 0.66 | 0.0018731 | 1.07 | 0.95 | 0.88 | 0.97 | 0.632738  | 0.46 | 0.62 | 0.52 | 0.54      | 6.55E-14  |
| ADP6     | Plate 03 | H19 | 363    | NM_001652   | CCUUAUCGUGUAGUUGUUG    | 0.70   | 0.95 | 2.92 | 1.52 | 2.284E-08 | 1.84 | 1.36 | 1.52 | 1.51 | 1.955E-06 | 1.13 | 1.14 | 1.26 | 1.18      | 1.397E-09 |
| C22orf15 | Plate 03 | I19 | 150248 | NM_182520   | CGCCGACUUAUCGUGUUGUUG  | 0.69   | 1.00 | 1.05 | 0.92 | 0.277233  | 0.89 | 0.76 | 0.94 | 0.87 | 0.0683534 | 0.75 | 1.17 | 0.77 | 0.89      | 0.27908   |
| C22orf15 | Plate 03 | J19 | 150248 | NM_182520   | GACUUAUCGUGUAGUUGUUG   | 0.68   | 0.68 | 0.96 | 0.68 | 0.0021102 | 0.68 | 0.68 | 0.92 | 0.83 | 0.225E-12 | 0.87 | 0.68 | 0.64 | 0.68      | 0.001387  |
| C22orf15 | Plate 03 | K19 | 150248 | NM_182520   | GACGAAAGCCUUAUCUUA     | 0.85   | 0.60 | 2.15 | 1.20 | 0.0028984 | 0.48 | 0.82 | 0.43 | 0.88 | 2.25E-12  | 0.87 | 0.25 | 0.89 | 0.67      | 1.908E-09 |
| C22orf15 | Plate 03 | L19 | 150248 | NM_182520   | ACAACUGGAGGAGGAGUUG    | 0.75   | 0.72 | 0.64 | 0.70 | 0.0217695 | 1.13 | 0.75 | 0.90 | 0.93 | 0.26921   | 0.68 | 0.64 | 0.67 | 0.0003204 |           |
| C2orf69  | Plate 03 | M16 | 205327 | NM_153695   | CGAGUUAUCGUGUAGUUGUUG  | 0.83   | 0.83 | 3.35 | 1.66 | 5.322E-10 | 0.88 | 0.74 | 0.88 | 0.83 | 0.0258852 | 0.87 | 0.97 | 1.53 | 1.15      | 1.463E-07 |
| C2orf69  | Plate 03 | N16 | 205327 | NM_153695   | CGACAAUCGUGUAGUUGUUG   | 0.83   | 0.87 | 0.76 | 0.86 | 0.735752  | 0.56 | 0.73 | 1.10 | 0.79 | 0.0146693 | 0.58 | 0.74 | 0.56 | 0.83      | 1.799E-06 |
| C2orf69  | Plate 03 | O16 | 205327 | NM_153695   | GCAUUAUCGUGUAGUUGUUG   | 1.02   | 1.02 | 0.98 | 1.02 | 0.00198   | 1.45 | 0.78 | 0.88 | 1.02 | 0.0104649 | 0.68 | 0.76 | 0.39 | 0.60      | 7.630E-10 |
| C2orf69  | Plate 03 | P16 | 205327 | NM_153695   | GGAAGCAUUAUCGUGUUGUUG  | 0.77</ |      |      |      |           |      |      |      |      |           |      |      |      |           |           |

|          |          |     |        |           |                     |      |      |      |      |           |      |      |      |      |            |      |      |      |      |           |
|----------|----------|-----|--------|-----------|---------------------|------|------|------|------|-----------|------|------|------|------|------------|------|------|------|------|-----------|
| GLIPR1L2 | Plate 03 | O19 | 144321 | NM_152436 | GGACGUAGAUUUAUAC    | 0.77 | 0.85 | 0.76 | 0.80 | 0.52798   | 1.03 | 1.03 | 1.21 | 1.09 | 0.346342   | 0.83 | 0.85 | 0.81 | 0.83 | 0.892881  |
| GLIPR1L2 | Plate 03 | P19 | 144321 | NM_152436 | GGGUCUACUUGCCGUCA   | 0.76 | 0.73 | 1.06 | 0.85 | 0.898291  | 0.19 | 0.41 | 0.54 | 0.44 | 4.3725-22  | 0.28 | 0.34 | 0.28 | 0.30 | 0         |
| GLIS2    | Plate 03 | H18 | 84662  | NM_032575 | GAAGGUCUUGCCGUCA    | 0.55 | 0.57 | 0.15 | 0.50 | 0.57      | 0.57 | 0.15 | 0.15 | 0.57 | 0.15       | 0.75 | 0.75 | 0.75 | 0.75 | 0.75      |
| GLIS2    | Plate 03 | N18 | 84662  | NM_032575 | CAACUUGUUGCCGUCA    | 0.64 | 0.64 | 0.70 | 0.59 | 1.1835-06 | 0.35 | 1.00 | 0.80 | 1.08 | 0.184899   | 0.40 | 0.73 | 0.39 | 0.51 | 2.006-19  |
| GLIS2    | Plate 03 | O18 | 84662  | NM_032575 | CCGAAAGGUAUGCCGUCA  | 0.79 | 0.79 | 1.32 | 0.97 | 0.0942699 | 0.87 | 0.79 | 1.03 | 0.93 | 0.312268   | 0.66 | 0.90 | 0.93 | 0.83 | 0.954126  |
| GLIS2    | Plate 03 | P18 | 84662  | NM_032575 | GGUCUUGGUAUGCCGUCA  | 0.75 | 0.82 | 0.94 | 0.84 | 0.955755  | 0.87 | 0.83 | 1.04 | 0.91 | 0.243913   | 0.60 | 0.81 | 0.51 | 0.64 | 4.151E-06 |
| GNAT1    | Plate 03 | E16 | 2779   | NM_000172 | GGAGUUGCCGUAGUUAU   | 0.77 | 0.89 | 0.66 | 0.78 | 0.314172  | 0.64 | 0.66 | 1.09 | 0.80 | 0.0202153  | 0.88 | 1.00 | 0.82 | 0.90 | 0.14482   |
| GNAT1    | Plate 03 | F16 | 2779   | NM_000172 | GAAGUUGCCGUAGUUAU   | 0.75 | 0.75 | 0.79 | 0.77 | 0.202043  | 0.75 | 0.75 | 0.75 | 0.75 | 0.07283    | 0.88 | 0.88 | 0.88 | 0.88 | 0.081478  |
| GNAT1    | Plate 03 | G16 | 2779   | NM_000172 | GAAGUUGCCGUAGUUAU   | 0.65 | 0.61 | 1.09 | 0.78 | 0.202043  | 0.75 | 0.75 | 0.75 | 0.75 | 0.07283    | 0.88 | 1.00 | 0.82 | 0.90 | 0.374E-05 |
| GNAT1    | Plate 03 | H16 | 2779   | NM_000172 | GCACGAGCCGCAAGGAAU  | 0.49 | 0.63 | 0.78 | 0.63 | 0.788E-05 | 1.01 | 0.93 | 0.94 | 0.96 | 0.596752   | 0.86 | 0.88 | 0.57 | 0.88 | 0.006521  |
| GPC3     | Plate 03 | E10 | 2719   | NM_004484 | CCAGUUGCAGUAGAAUUA  | 0.87 | 0.89 | 1.05 | 0.94 | 0.106734  | 1.04 | 0.77 | 0.96 | 0.92 | 0.283146   | 1.01 | 0.91 | 1.14 | 1.02 | 0.003521  |
| GPC3     | Plate 03 | F10 | 2719   | NM_004484 | UGGUGGAGUUGCAAGUA   | 0.86 | 0.70 | 3.34 | 1.63 | 0.9245-09 | 0.75 | 1.11 | 0.74 | 0.87 | 0.0519409  | 1.05 | 0.79 | 1.49 | 1.11 | 0.468E-06 |
| GPC3     | Plate 03 | G10 | 2719   | NM_004484 | GCAGUUAUGGCAAGUUA   | 0.49 | 0.49 | 0.69 | 0.65 | 0.0203484 | 0.75 | 0.75 | 0.75 | 0.75 | 0.0203484  | 0.75 | 0.75 | 0.75 | 0.75 | 0.97E-19  |
| GPC3     | Plate 03 | H10 | 2719   | NM_004484 | GGUCAGAUUGCAAGUUA   | 0.70 | 0.69 | 0.72 | 0.67 | 0.0234569 | 0.74 | 1.02 | 0.75 | 0.84 | 0.0228505  | 0.70 | 0.62 | 0.83 | 0.71 | 0.0130209 |
| GPC6     | Plate 03 | E22 | 10082  | NM_005708 | CAGCAAGCCGAGUACUUG  | 0.81 | 0.71 | 0.70 | 0.74 | 0.110168  | 0.65 | 0.64 | 0.85 | 0.71 | 3.704E-05  | 0.58 | 0.50 | 0.55 | 0.54 | 1.29E-12  |
| GPC6     | Plate 03 | F22 | 10082  | NM_005708 | CGAUGAUUGCAGAUUUC   | 0.69 | 0.74 | 0.77 | 0.73 | 0.088113  | 0.89 | 0.86 | 0.83 | 0.86 | 0.0883316  | 0.78 | 0.96 | 0.84 | 0.86 | 0.497211  |
| GPC6     | Plate 03 | G22 | 10082  | NM_005708 | GAUUAUGUUGCCGUAGU   | 0.86 | 1.09 | 3.23 | 1.73 | 2.8E-14   | 1.18 | 1.44 | 1.51 | 1.38 | 0.0020491  | 0.87 | 1.32 | 1.00 | 1.06 | 4.244E-05 |
| GPC6     | Plate 03 | H22 | 10082  | NM_005708 | CAGUUAUGUUGCCGUAGU  | 0.57 | 0.91 | 1.40 | 1.00 | 0.004229  | 0.82 | 0.82 | 1.35 | 1.00 | 0.574328   | 0.77 | 0.82 | 0.77 | 0.83 | 0.19458   |
| GPR3     | Plate 03 | I11 | 2827   | NM_005281 | UUUAUCCACUCCAGAA    | 0.97 | 1.15 | 2.11 | 1.41 | 1.981E-11 | 1.12 | 1.03 | 0.66 | 0.94 | 0.28646    | 1.14 | 1.21 | 1.28 | 1.12 | 6.448E-11 |
| GPR3     | Plate 03 | J11 | 2827   | NM_005281 | CCACUUCUUAACCUUUA   | 0.78 | 0.67 | 0.65 | 0.70 | 0.0176373 | 0.93 | 1.05 | 0.96 | 0.98 | 0.789895   | 0.79 | 0.49 | 0.53 | 0.61 | 1.38E-08  |
| GPR3     | Plate 03 | K11 | 2827   | NM_005281 | ACCUGUACUUCUUCUGUA  | 0.81 | 0.74 | 0.88 | 0.81 | 0.716493  | 0.65 | 0.49 | 0.94 | 0.70 | 1.761E-06  | 0.71 | 0.86 | 0.95 | 0.84 | 0.828228  |
| GPR3     | Plate 03 | L11 | 2827   | NM_005281 | ACAUUGCCUUCUUCUUAU  | 0.67 | 0.75 | 1.77 | 1.06 | 0.0430398 | 0.69 | 0.76 | 0.95 | 0.83 | 0.326466   | 0.62 | 0.65 | 1.83 | 0.4  | 0.113733  |
| GSK3B    | Plate 03 | M06 | 2932   | NM_002093 | GAGAAAGUAGGUGUUAU   | 0.58 | 0.83 | 0.39 | 0.60 | 3.755E-07 | 0.51 | 0.37 | 0.97 | 0.62 | 1.92E-11   | 0.68 | 0.86 | 0.43 | 0.66 | 6.131E-06 |
| GSK3B    | Plate 03 | N06 | 2932   | NM_002093 | GGACCAGUAGUCCAAUA   | 0.88 | 0.86 | 0.74 | 0.83 | 0.928641  | 0.89 | 1.31 | 1.28 | 1.16 | 0.12512    | 0.76 | 0.96 | 0.82 | 0.85 | 0.692975  |
| GSK3B    | Plate 03 | O06 | 2932   | NM_002093 | GAUGAGGUUAUUCUUAU   | 0.54 | 0.64 | 0.47 | 0.55 | 0.343E-09 | 0.72 | 0.97 | 0.73 | 0.81 | 0.0072025  | 0.67 | 0.86 | 0.73 | 0.77 | 0.231903  |
| GSK3B    | Plate 03 | P06 | 2932   | NM_002093 | GGCAAGUUGUUAACAGCA  | 0.76 | 0.67 | 0.74 | 0.72 | 0.057499  | 0.47 | 0.50 | 0.82 | 0.60 | 7.518E-11  | 0.42 | 0.64 | 0.48 | 0.51 | 9.965E-17 |
| HEFH     | Plate 03 | F07 | 9843   | NM_014799 | CCAGUUAUGUUAAGUUA   | 0.76 | 0.61 | 0.66 | 0.68 | 0.036545  | 1.01 | 0.65 | 0.81 | 0.82 | 0.0354644  | 0.78 | 0.83 | 0.91 | 0.81 | 0.83981   |
| HEFH     | Plate 03 | G07 | 9843   | NM_014799 | CCUUGUUGUUAUUAUUA   | 0.69 | 0.69 | 0.57 | 0.67 | 0.182E-07 | 0.61 | 0.61 | 0.82 | 0.77 | 0.0102E-07 | 0.61 | 0.70 | 0.63 | 0.61 | 0.54E-07  |
| HEFH     | Plate 03 | H07 | 9843   | NM_014799 | GGUUAUGUUAUUAUUAU   | 0.66 | 0.69 | 0.53 | 0.63 | 0.839E-05 | 0.82 | 0.86 | 0.91 | 0.86 | 0.0745678  | 0.79 | 0.79 | 0.71 | 0.76 | 0.149898  |
| HEFH     | Plate 03 | L07 | 9843   | NM_014799 | CUUAUGGAAUGUUGUUA   | 0.97 | 0.78 | 0.72 | 0.76 | 0.20387   | 0.89 | 1.05 | 1.02 | 0.99 | 0.819485   | 1.71 | 0.83 | 0.91 | 0.82 | 0.821261  |
| HMB3     | Plate 03 | I10 | 3149   | NM_005342 | CAGUUAUGUUGUUAUUA   | 0.92 | 0.72 | 1.53 | 1.05 | 0.088022  | 1.24 | 0.93 | 1.12 | 1.10 | 0.334412   | 1.17 | 0.78 | 0.85 | 0.94 | 0.0617258 |
| HMB3     | Plate 03 | J10 | 3149   | NM_005342 | GAUUAUGUUGUUAUUAU   | 0.76 | 0.81 | 0.76 | 0.83 | 0.295844  | 0.81 | 0.78 | 0.83 | 0.81 | 0.0354644  | 0.63 | 0.89 | 0.83 | 0.89 | 0.232929  |
| HMB3     | Plate 03 | K10 | 3149   | NM_005342 | GAUUAUGUUGUUAUUAU   | 0.74 | 0.81 | 0.79 | 0.78 | 0.382027  | 1.01 | 1.02 | 0.85 | 0.96 | 0.574402   | 0.68 | 0.78 | 0.67 | 0.71 | 0.014635  |
| HMB3     | Plate 03 | L10 | 3149   | NM_005342 | GGUUAUGGAGAGGAGUUA  | 0.57 | 0.74 | 0.79 | 0.70 | 0.013857  | 0.67 | 0.58 | 0.96 | 0.73 | 0.95E-05   | 0.66 | 0.68 | 0.50 | 0.58 | 1.066E-09 |
| HNRNPUL1 | Plate 03 | A16 | 11100  | NM_007040 | CGCAAGUUGUUAUUAUUA  | 0.38 | 0.48 | 0.52 | 0.45 | 4.774E-17 | 0.29 | 0.44 | 0.46 | 0.45 | 3.308E-21  | 0.31 | 0.28 | 0.29 | 0.30 | 0         |
| HNRNPUL1 | Plate 03 | B16 | 11100  | NM_007040 | GGGAAGUUGUUAUUAUUA  | 1.04 | 1.28 | 2.76 | 1.69 | 1.9E-17   | 2.49 | 0.63 | 0.69 | 1.21 | 0.943E-06  | 1.58 | 1.62 | 1.15 | 1.45 | 4.105E-21 |
| HNRNPUL1 | Plate 03 | C16 | 11100  | NM_007040 | GGUUAUGUUGUUAUUAUUA | 0.96 | 1.01 | 1.96 | 1.59 | 0.246934  | 0.78 | 1.22 | 1.09 | 1.03 | 0.9137221  | 0.82 | 0.99 | 0.91 | 0.77 | 3.658E-10 |
| HNRNPUL1 | Plate 03 | D16 | 11100  | NM_007040 | CGCAUUAUUGUUAUUAU   | 0.65 | 0.61 | 0.62 | 0.62 | 0.0001181 | 1.00 | 0.79 | 0.94 | 0.94 | 0.40328    | 0.68 | 0.79 | 0.71 | 0.73 | 0.030561  |
| HPX      | Plate 03 | I20 | 3263   | NM_000613 | CAAUUGGACCGGAGUUA   | 0.76 | 0.63 | 0.67 | 0.68 | 0.0084256 | 1.00 | 0.81 | 0.86 | 0.89 | 0.1440999  | 0.59 | 0.84 | 0.63 | 0.69 | 0.000869  |
| HPX      | Plate 03 | J20 | 3263   | NM_000613 | GGCAAAUGUUGUUAUUAU  | 0.69 | 0.98 | 1.00 | 0.89 | 0.440455  | 0.99 | 0.91 | 0.83 | 0.91 | 0.237111   | 0.70 | 0.61 | 0.66 | 0.66 | 0.001064  |
| HPX      | Plate 03 | K20 | 3263   | NM_000613 | GGUUAUGUUGUUAUUAUUA | 0.59 | 0.75 | 0.59 | 0.64 | 0.0030498 | 0.64 | 0.81 | 0.89 | 0.78 | 0.0207175  | 0.65 | 0.82 | 0.47 | 0.65 | 5.539E-06 |
| HPX      | Plate 03 | L20 | 3263   | NM_000613 | GGUUAUGUUGUUAUUAUUA | 0.39 | 0.81 | 0.72 | 0.59 | 0.246934  | 0.78 | 1.22 | 1.09 | 1.03 | 0.9137221  | 0.82 | 0.99 | 0.91 | 0.77 | 0.115558  |
| HTR3E    | Plate 03 | I18 | 285242 | NM_182589 | GAGGUGUUGUUAUUAUUA  | 0.80 | 0.79 | 0.61 | 0.73 | 0.072338  | 1.02 | 0.87 | 1.13 | 1.01 | 0.978903   | 0.95 | 0.95 | 0.86 | 0.92 | 0.061279  |
| HTR3E    | Plate 03 | J18 | 285242 | NM_182589 | CAAAAGGUCUUAUUAUUA  | 0.60 | 0.41 | 0.48 | 0.49 | 6.11E-13  | 0.44 | 0.63 | 0.66 | 0.58 | 1.896E-11  | 0.48 | 0.57 | 0.42 | 0.49 | 3.199E-19 |
| HTR3E    | Plate 03 | K18 | 285242 | NM_182589 | GGCAUUGGAAAGGAGUUA  | 0.69 | 0.67 | 1.09 | 0.82 | 0.567383  | 0.77 | 1.07 | 1.01 | 0.95 | 0.446073   | 1.29 | 0.88 | 1.10 | 1.09 | 4.907E-06 |
| HTR3E    | Plate 03 | L18 | 285242 | NM_182589 | GGAGGAGUUGUUAUUAUUA | 0.81 | 0.73 | 0.77 | 0.77 | 0.030573  | 1.02 | 0.86 | 0.94 | 0.94 | 0.424931   | 0.53 | 0.65 | 0.88 | 0.62 | 8.491E-07 |
| IOCA1    | Plate 03 | G21 | 79781  | NM_024726 | GAAGGAGUUGUUAUUAUUA | 0.86 | 0.86 | 0.66 | 0.86 | 0.001459  | 0.68 | 0.68 | 0.76 | 0.68 | 0.001459   | 0.68 | 0.68 | 0.68 | 0.68 | 0.001459  |
| IOCA1    | Plate 03 | H21 | 79781  | NM_024726 | GAAGGAGUUGUUAUUAUUA | 0.80 | 0.76 | 0.84 | 0.80 | 0.609654  | 0.87 | 0.88 | 1.05 | 0.83 | 0.369314   | 0.85 | 0.83 | 0.85 | 0.84 | 0.683193  |
| IOCA1    | Plate 03 | I21 | 79781  | NM_024726 | GGCAAGUUGUUAUUAUUA  | 0.60 | 0.60 | 0.49 | 0.56 | 0.608E-08 | 0.76 | 0.76 | 0.99 | 0.84 | 0.0232364  | 0.49 | 0.61 | 0.50 | 0.54 | 7.887E-14 |
| IOCA1    | Plate 03 | J21 | 79781  | NM_024726 | CGGUAUGUUGUUAUUAUUA | 0.58 | 0.53 | 0.46 | 0.53 | 1.828E-10 | 0.72 | 0.71 | 0.72 | 0.71 | 5.755E-05  | 0.57 | 0.74 | 0.75 | 0.69 | 0.0012828 |
| IRX2     | Plate 03 | B07 | 153572 | NM_033267 | GGUUAUGUUGUUAUUAUUA | 1.04 | 0.74 | 0.59 | 0.79 | 0.294002  | 0.92 | 0.89 | 1.06 | 0.95 | 0.505853   | 0.57 | 0.56 | 0.57 | 0.57 | 0.299E-10 |
| IRX2     | Plate 03 | C07 | 153572 | NM_033267 | GGUUAUGUUGUUAUUAUUA | 1.23 | 1.16 | 2.46 | 1.61 | 1.829E-16 | 0.96 | 0.82 | 2.31 | 0.99 | 0.082196   | 0.61 | 0.74 | 1.18 | 0.97 | 0.789409  |
| IRX2     | Plate 03 | D07 | 153572 | NM_033267 | GGUUAUGUUGUUAUUAUUA | 0.56 | 0.42 | 0.74 | 0.71 | 0.0030215 | 0.62 | 0.72 | 0.99 | 0.78 | 0.0015584  | 0.84 | 0.54 | 0.65 | 0.66 | 9.78E-05  |
| IRX2     | Plate 03 | E07 | 153572 | NM_033267 | AGAGCAAGGAGGAGUUAU  | 0.94 | 0.61 | 0.67 | 0.61 | 1.408E-05 | 0.34 | 0.34 | 0.28 | 0.32 | 0.4        | 0.16 | 0.14 | 0.17 | 0.15 | 0         |
| KIF3A    | Plate 03 | A13 | 11127  | NM_007054 | AAACAAGUUGUUAUUAUUA | 0.45 | 0.68 | 0.44 | 0.53 | 4.141E-11 | 0.63 | 0.42 | 0.55 | 0.53 | 2.687E-14  | 0.41 | 0.39 | 0.37 | 0.39 | 4.484E-37 |
| KIF3A    | Plate 03 | B13 | 11127  | NM_007054 | UAUUAUGUUGUUAUUAUUA | 0.82 | 0.79 | 0.67 | 0.83 | 0.351633  | 0.93 | 0.73 | 0.88 | 0.84 | 0.038822   | 1.04 | 0.88 | 0.84 | 0.86 | 0.0103663 |
| KIF3A    | Plate 03 | C13 | 11127  | NM_007054 | CAACAAGUUGUUAUUAUUA | 0.72 | 0.65 | 0.82 | 0.65 | 0.012592  | 1.10 | 0.79 | 0.84 | 0.83 | 0.2140594  | 0.65 | 0.81 | 0.79 | 0.82 | 0.904618  |
| KIF3A    | Plate 03 | D13 | 11127  | NM_007054 | GCAGUUAUGUUAUUAUUAU |      |      |      |      |           |      |      |      |      |            |      |      |      |      |           |

|          |          |     |        |              |                    |      |      |      |      |           |       |      |      |       |           |      |      |      |      |            |
|----------|----------|-----|--------|--------------|--------------------|------|------|------|------|-----------|-------|------|------|-------|-----------|------|------|------|------|------------|
| RAB4B    | Plate 03 | B19 | 53916  | NM_016154    | AGAAUAGGUGUAGUUCU  | 0.80 | 0.77 | 1.00 | 0.86 | 0.726997  | 0.76  | 1.03 | 1.61 | 1.13  | 0.384592  | 0.84 | 0.78 | 0.97 | 0.86 | 0.460713   |
| RAB4B    | Plate 03 | C19 | 53916  | NM_016154    | UGGUUUGGGGACGACGAA | 0.84 | 0.82 | 0.87 | 0.84 | 0.826142  | 0.89  | 1.12 | 1.12 | 1.04  | 0.694313  | 0.86 | 0.88 | 0.90 | 0.88 | 0.252838   |
| RAB4B    | Plate 03 | E19 | 53916  | NM_016154    | UGGACGAGGUGUAGUUCU | 0.36 | 0.46 | 0.29 | 0.72 | 0.395516  | 0.57  | 0.30 | 0.29 | 0.54  | 0.286220  | 0.29 | 0.24 | 0.34 | 0.24 | 0.142771   |
| RAD9A    | Plate 03 | F08 | 5883   | NM_004584    | UACGACAAUCUGUAGUUA | 0.81 | 0.26 | 0.29 | 0.29 | 0.0       | 0.15  | 0.15 | 0.15 | 0.15  | 0.15      | 0.15 | 0.11 | 0.17 | 0.14 | 0.0        |
| RAD9A    | Plate 03 | F08 | 5883   | NM_004584    | GACAUUGACUUCUAGUA  | 0.19 | 0.19 | 0.18 | 0.19 | 0.0       | 0.20  | 0.14 | 0.13 | 0.16  | 0.0       | 0.15 | 0.12 | 0.18 | 0.15 | 0.0        |
| RAD9A    | Plate 03 | H08 | 5883   | NM_004584    | GAAACACCUAUGAGCAU  | 0.77 | 0.42 | 0.59 | 0.59 | 0.524247  | 0.20  | 0.74 | 0.41 | 0.67  | 0.624E-08 | 0.90 | 0.60 | 0.69 | 0.73 | 0.021334   |
| RAD9A    | Plate 03 | H08 | 5883   | NM_004584    | CGACUUGACUUCUACAG  | 0.27 | 0.30 | 0.38 | 0.32 | 0.0       | 0.32  | 0.36 | 0.31 | 0.33  | 0.0       | 0.23 | 0.20 | 0.27 | 0.23 | 0.0        |
| RASSF7   | Plate 03 | F07 | 8045   | NM_003475    | UGGACGAGGUGUAGUUCU | 0.45 | 0.45 | 1.76 | 0.83 | 0.0312841 | 1.45  | 0.70 | 0.64 | 0.64  | 0.64      | 0.46 | 0.47 | 0.47 | 0.71 | 1.41427    |
| RASSF7   | Plate 03 | F07 | 8045   | NM_003475    | GAAAGGCGUUCUAGUUGU | 0.83 | 0.88 | 0.79 | 0.83 | 0.962586  | 0.07  | 0.98 | 0.10 | 1.03  | 0.73501   | 0.89 | 0.95 | 0.84 | 0.93 | 0.017134   |
| RASSF7   | Plate 03 | G07 | 8045   | NM_003475    | CGCCAGUCCGCAUGCAU  | 0.97 | 0.93 | 0.98 | 0.96 | 0.405688  | 0.04  | 0.84 | 0.99 | 0.87  | 0.073185  | 0.94 | 0.92 | 1.23 | 1.03 | 0.002623   |
| RASSF7   | Plate 03 | H07 | 8045   | NM_003475    | CACGAGGCGAGGUGUUGA | 0.51 | 0.51 | 0.77 | 0.60 | 1.702E-06 | 1.07  | 0.99 | 0.77 | 0.95  | 0.442807  | 0.42 | 0.72 | 0.82 | 0.65 | 4.2E-06    |
| RNASEH2C | Plate 03 | E11 | 84153  | NM_032193    | CGACUUGACUUCUACAG  | 0.89 | 0.81 | 1.18 | 0.96 | 0.068979  | 0.64  | 0.61 | 0.96 | 0.74  | 9.756E-05 | 0.73 | 0.77 | 0.76 | 0.75 | 0.129589   |
| RNASEH2C | Plate 03 | E11 | 84153  | NM_032193    | UGGACGAGGUGUAGUUCU | 0.71 | 0.71 | 0.68 | 0.68 | 0.013214  | 1.45  | 0.70 | 0.64 | 0.64  | 0.64      | 0.46 | 0.47 | 0.47 | 0.54 | 0.203039   |
| RNASEH2C | Plate 03 | G11 | 84153  | NM_032193    | CAAGUUGCGGUGGCGUUA | 1.06 | 0.89 | 1.14 | 1.03 | 0.003842  | 1.08  | 1.24 | 0.96 | 1.10  | 0.343036  | 0.19 | 0.74 | 1.33 | 1.19 | 8.505E-10  |
| RNASEH2C | Plate 03 | H11 | 84153  | NM_032193    | CGCGAGGUGUUCACGCA  | 0.98 | 0.92 | 0.54 | 0.81 | 0.46596   | 1.16  | 0.81 | 1.07 | 1.01  | 9.985052  | 1.11 | 1.10 | 0.78 | 1.00 | 0.002429   |
| ROMO1    | Plate 03 | A15 | 140823 | NM_080748    | GGGAAACCAUGAGGACGA | 0.78 | 0.91 | 0.61 | 0.77 | 0.205929  | 0.05  | 0.95 | 1.00 | 1.00  | 0.960417  | 0.87 | 0.99 | 0.78 | 0.88 | 0.29256    |
| ROMO1    | Plate 03 | B15 | 140823 | NM_080748    | CGACUUGACUUCUACAG  | 1.01 | 0.95 | 0.84 | 0.93 | 0.115637  | 0.94  | 0.36 | 0.81 | 0.97  | 2.813E-13 | 0.90 | 0.83 | 0.50 | 0.74 | 0.027265   |
| ROMO1    | Plate 03 | C15 | 140823 | NM_080748    | UGGACGAGGUGUAGUUCU | 1.18 | 0.68 | 1.00 | 0.81 | 0.120418  | 1.11  | 0.85 | 0.84 | 0.93  | 0.340288  | 0.81 | 0.83 | 0.96 | 0.87 | 0.403341   |
| ROMO1    | Plate 03 | D15 | 140823 | NM_080748    | CAGCCCAUGUACUUAUAA | 0.78 | 0.77 | 0.80 | 0.78 | 0.429903  | 0.50  | 0.83 | 1.05 | 0.93  | 0.320019  | 0.79 | 0.65 | 0.95 | 0.79 | 0.454709   |
| SERPINA6 | Plate 03 | M14 | 866    | NM_001756    | CAUCAAGGUGUUCUAA   | 0.97 | 0.88 | 0.96 | 0.94 | 0.091280  | 0.80  | 0.52 | 0.77 | 0.70  | 6.375E-06 | 1.10 | 0.68 | 0.90 | 0.90 | 0.264614   |
| SERPINA6 | Plate 03 | N14 | 866    | NM_001756    | GCAAAUUGUCACGCGUA  | 0.77 | 0.78 | 1.68 | 1.07 | 0.0131072 | 0.32  | 0.75 | 0.93 | 0.67  | 2.978E-09 | 0.41 | 0.76 | 1.06 | 0.74 | 0.001832   |
| SERPINA6 | Plate 03 | O14 | 866    | NM_001756    | CGACUUGACUUCUACAG  | 0.56 | 0.56 | 1.29 | 0.81 | 0.181309  | 1.52  | 0.44 | 0.65 | 0.97  | 0.009169  | 0.69 | 0.49 | 1.21 | 0.83 | 0.356044   |
| SERPINA6 | Plate 03 | P14 | 866    | NM_001756    | UACGACAAUCUGUAGUUA | 0.73 | 0.69 | 0.67 | 0.70 | 0.160226  | 0.82  | 0.68 | 1.06 | 0.89  | 0.0098291 | 0.66 | 0.68 | 0.90 | 0.78 | 0.247436   |
| SETDB1   | Plate 03 | IO4 | 9869   | NM_012432    | GACUUGACUUCUACAG   | 0.62 | 1.00 | 0.90 | 0.84 | 0.915456  | 1.09  | 0.91 | 1.74 | 1.25  | 0.0352874 | 0.59 | 0.88 | 0.84 | 0.77 | 0.161975   |
| SETDB1   | Plate 03 | JO4 | 9869   | NM_012432    | CGACGAGGUGUUCUUGU  | 0.99 | 0.81 | 1.05 | 0.95 | 0.076225  | 0.84  | 0.84 | 0.88 | 0.85  | 0.057957  | 0.77 | 0.61 | 0.82 | 0.74 | 0.0354185  |
| SETDB1   | Plate 03 | K04 | 9869   | NM_012432    | AAGAUGGUGUUCUUGU   | 0.79 | 0.81 | 0.68 | 0.78 | 0.331078  | 0.79  | 1.12 | 1.00 | 0.97  | 0.602495  | 0.65 | 0.97 | 0.84 | 0.82 | 0.768744   |
| SETDB1   | Plate 03 | L04 | 9869   | NM_012432    | CGACGAGGUGUUCUUGU  | 0.56 | 0.63 | 0.83 | 0.83 | 0.0020295 | 0.65  | 0.74 | 0.86 | 0.75  | 0.0004502 | 0.80 | 0.77 | 0.74 | 0.73 | 0.032686   |
| STK16    | Plate 03 | E03 | 8576   | NM_001008910 | CAGGUGUUCUUCUUGUUA | 1.07 | 0.65 | 0.78 | 0.81 | 0.586469  | 1.08  | 1.12 | 1.28 | 1.06  | 0.021028  | 0.56 | 0.67 | 0.82 | 0.82 | 2.02E-20   |
| STK16    | Plate 03 | F03 | 8576   | NM_001008910 | CGACUUGACUUCUACAG  | 0.67 | 0.80 | 1.57 | 0.98 | 0.302006  | 0.67  | 0.91 | 0.95 | 0.84  | 0.0822816 | 0.47 | 0.73 | 0.67 | 0.63 | 0.4884E-07 |
| STK16    | Plate 03 | G03 | 8576   | NM_001008910 | GGUUGGUGUUCUUGUUA  | 0.70 | 0.83 | 0.78 | 0.77 | 0.290719  | 0.78  | 0.90 | 0.80 | 0.83  | 0.0210387 | 0.82 | 0.94 | 0.93 | 0.90 | 0.155445   |
| STK16    | Plate 03 | H03 | 8576   | NM_001008910 | UGGACGAGGUGUAGUUCU | 0.46 | 0.43 | 0.39 | 0.43 | 0.203E-20 | 0.41  | 0.22 | 0.33 | 0.32  | 0.0       | 0.19 | 0.29 | 0.13 | 0.20 | 0.0        |
| TAS2R19  | Plate 03 | I15 | 25294  | NM_176888    | CGACUUGACUUCUACAG  | 0.25 | 0.30 | 0.79 | 0.67 | 0.779725  | 0.78  | 0.67 | 0.76 | 0.89  | 0.021028  | 0.76 | 0.84 | 0.86 | 0.82 | 0.231E-05  |
| TAS2R19  | Plate 03 | K08 | 25294  | NM_176888    | UACGACAAUCUGUAGUUA | 0.60 | 0.63 | 0.95 | 0.73 | 0.0340509 | 0.63  | 0.87 | 0.97 | 0.82  | 0.0116488 | 0.51 | 0.73 | 0.83 | 0.69 | 0.0007994  |
| TAS2R19  | Plate 03 | L08 | 25294  | NM_176888    | UGGUGUACACACGAAAG  | 0.78 | 0.76 | 0.65 | 0.73 | 0.0722611 | 0.85  | 1.04 | 1.02 | 0.97  | 0.655204  | 0.65 | 0.73 | 0.68 | 0.89 | 0.018847   |
| TLE1     | Plate 03 | IO6 | 7088   | NM_005077    | GACGAGGUGUUCUUGU   | 0.73 | 0.68 | 0.97 | 0.80 | 0.435629  | 1.02  | 1.02 | 1.85 | 0.86  | 0.0585281 | 1.00 | 0.82 | 1.09 | 0.97 | 0.007381   |
| TLE1     | Plate 03 | JO6 | 7088   | NM_005077    | CGACGAGGUGUUCUUGU  | 0.79 | 0.95 | 2.36 | 1.37 | 2.35E-07  | 1.51  | 0.82 | 1.54 | 1.29  | 0.0123177 | 0.88 | 0.87 | 1.39 | 1.05 | 0.002505   |
| TLE1     | Plate 03 | K06 | 7088   | NM_005077    | GCAAAUUGUCACGCGUA  | 0.50 | 0.81 | 0.60 | 0.77 | 0.2232064 | 0.74  | 0.66 | 1.03 | 0.81  | 0.006145  | 0.81 | 0.89 | 0.53 | 0.74 | 0.036131   |
| TTC12    | Plate 03 | A20 | 54970  | NM_017868    | GAAAGAGACUUCGCUUA  | 0.57 | 0.44 | 0.50 | 0.50 | 4.407E-12 | 0.64  | 0.51 | 0.77 | 0.64  | 4.589E-08 | 0.32 | 0.29 | 0.34 | 0.31 | 0.0        |
| TTC12    | Plate 03 | B20 | 54970  | NM_017868    | UCUUGAGGUGUUCUUA   | 0.74 | 0.83 | 0.85 | 0.81 | 0.681862  | 0.96  | 0.96 | 1.08 | 1.01  | 0.981778  | 0.90 | 0.95 | 0.96 | 0.97 | 0.0058424  |
| TTC12    | Plate 03 | C20 | 54970  | NM_017868    | CAAGGAGGUGUUCUUGU  | 0.93 | 0.70 | 0.87 | 0.84 | 0.969566  | 0.96  | 0.98 | 1.04 | 1.00  | 0.901014  | 0.83 | 0.75 | 0.74 | 0.77 | 0.276535   |
| TTC12    | Plate 03 | D20 | 54970  | NM_017868    | CAGGUGUUCUUCUUGUUA | 0.57 | 0.11 | 1.11 | 0.93 | 0.003748  | 0.53  | 0.91 | 0.91 | 0.91  | 1.16      | 0.87 | 0.79 | 0.82 | 0.79 | 0.50892    |
| Y1F1B    | Plate 03 | M10 | 90522  | NM_001039671 | CGACGAGGUGUUCUUGU  | 0.68 | 0.62 | 1.90 | 1.06 | 0.12228   | 1.29  | 0.43 | 0.93 | 0.89  | 0.0082468 | 1.28 | 0.93 | 1.68 | 1.30 | 4.51E-13   |
| Y1F1B    | Plate 03 | N10 | 90522  | NM_001039671 | UACCAAGCUCUUAUUA   | 0.84 | 0.99 | 0.81 | 0.84 | 0.450969  | 0.98  | 0.88 | 1.01 | 0.96  | 0.056238  | 0.83 | 0.99 | 0.89 | 0.90 | 0.125049   |
| Y1F1B    | Plate 03 | O10 | 90522  | NM_001039671 | GACUUGACUUCUACAG   | 0.28 | 0.79 | 0.92 | 0.84 | 0.1545028 | 2.53  | 0.05 | 0.65 | 1.08  | 6.99E-23  | 0.42 | 0.70 | 0.92 | 0.88 | 3.98E-05   |
| Y1F1B    | Plate 03 | P10 | 90522  | NM_001039671 | CAAAUUGUCACGCGUA   | 0.74 | 0.79 | 0.43 | 0.66 | 0.0001781 | 1.48  | 2.14 | 0.80 | 1.48  | 0.0003107 | 0.80 | 0.70 | 0.81 | 0.71 | 0.035065   |
| ZNF324   | Plate 03 | A21 | 25799  | NM_014347    | CAGGUGUUCUUCUUGUUA | 0.41 | 0.41 | 1.22 | 0.81 | 0.586469  | 1.13  | 1.28 | 1.18 | 1.22  | 0.18      | 0.72 | 0.72 | 0.72 | 0.72 | 0.03172    |
| ZNF324   | Plate 03 | B21 | 25799  | NM_014347    | CAGGUGUUCUUCUUGUUA | 0.74 | 0.78 | 0.83 | 0.78 | 0.422134  | 0.72  | 0.77 | 1.07 | 0.85  | 0.0362840 | 0.91 | 0.91 | 0.97 | 0.93 | 0.038081   |
| ZNF324   | Plate 03 | C21 | 25799  | NM_014347    | CGCCAGGUGUUCUUGUUA | 0.53 | 1.20 | 4.29 | 2.01 | 9.23E-13  | 1.02  | 1.96 | 1.28 | 2.42  | 4.888E-17 | 0.99 | 1.13 | 0.78 | 0.96 | 0.0112182  |
| ZNF324   | Plate 03 | D21 | 25799  | NM_014347    | CGACUUGACUUCUACAG  | 0.98 | 0.43 | 2.17 | 1.19 | 0.0315554 | -8.44 | 1.50 | 0.99 | -1.98 | 0.0565969 | 0.96 | 0.48 | 0.59 | 0.68 | 4.51E-05   |
| ZNF41    | Plate 03 | I15 | 7592   | NM_007130    | CGACUUGACUUCUACAG  | 0.57 | 0.69 | 0.52 | 0.61 | 0.3467079 | 1.14  | 0.92 | 0.88 | 0.96  | 0.2726237 | 1.27 | 0.66 | 1.55 | 1.16 | 0.398E-06  |
| ZNF41    | Plate 03 | J15 | 7592   | NM_007130    | GAGGUGUUCUUCUUGUUA | 0.82 | 0.56 | 0.62 | 0.62 | 0.003216  | 0.68  | 0.76 | 0.85 | 0.75  | 0.000216  | 0.67 | 0.87 | 0.50 | 0.87 | 0.0011101  |
| ZNF41    | Plate 03 | K15 | 7592   | NM_007130    | CAGUUGUUCUUCUUGUUA | 0.62 | 0.71 | 0.69 | 0.67 | 0.0039257 | 1.00  | 0.90 | 0.86 | 0.92  | 0.295274  | 0.57 | 0.89 | 0.75 | 0.74 | 0.029786   |
| ZNF41    | Plate 03 | L15 | 7592   | NM_007130    | GAAAGACGACUUAUUA   | 0.68 | 0.69 | 0.72 | 0.70 | 0.0164712 | 0.69  | 0.97 | 0.93 | 0.86  | 0.0570389 | 0.82 | 0.81 | 0.75 | 0.80 | 0.519474   |
| ZNF674   | Plate 03 | A22 | 641339 | NM_001039891 | AAUUAUCUUCUUCUUA   | 0.99 | 1.08 | 0.67 | 0.68 | 0.0077337 | 1.07  | 1.07 | 1.25 | 1.10  | 0.325417  | 0.78 | 0.88 | 0.69 | 0.77 | 0.191385   |
| ZNF674   | Plate 03 | B22 | 641339 | NM_001039891 | CGACUUGACUUCUACAG  | 0.76 | 0.79 | 0.62 | 0.76 | 0.4783048 | 0.63  | 0.88 | 1.03 | 0.84  | 0.4783048 | 0.66 | 0.84 | 0.86 | 0.83 | 0.948599   |
| ZNF674   | Plate 03 | C22 | 641339 | NM_001039891 | ACAAUUGACUUCUUA    | 0.59 | 0.63 | 1.39 | 1.14 | 3.30E-05  | 0.99  | 0.70 | 0.87 | 0.88  | 0.12042   | 1.19 | 0.87 | 0.90 | 0.99 | 0.003265   |
| ZNF674   | Plate 03 | D22 | 641339 | NM_001039891 | CUUGAGGUGUUCUUA    | 0.53 | 0.72 | 0.79 | 0.68 | 0.0035184 | 0.67  | 0.57 | 0.93 | 0.73  | 3.994E-05 | 0.50 | 0.69 | 0.74 | 0.64 | 9.167E-06  |
| ZNF709   | Plate 03 | M08 | 163051 | NM_152601    | GAAAGAGGUGUAGUUCU  | 0.77 | 0.88 | 2.03 | 1.23 | 5.93E-05  | 1     |      |      |       |           |      |      |      |      |            |

|          |          |     |        |              |                     |        |      |       |       |           |        |       |      |       |            |       |      |      |      |           |
|----------|----------|-----|--------|--------------|---------------------|--------|------|-------|-------|-----------|--------|-------|------|-------|------------|-------|------|------|------|-----------|
| EXOS04   | Plate 04 | E12 | 54512  | NM_019037    | CUAUGGACUUGCAUAUA   | 0.58   | 0.52 | 0.43  | 0.51  | 1.586E-11 | 0.98   | 0.83  | 0.80 | 0.87  | 0.421444   | 0.76  | 0.71 | 0.77 | 0.75 | 0.41444   |
| EXOS04   | Plate 04 | H12 | 54512  | NM_019037    | CUAUGGACUUGGUAU     | 0.84   | 0.70 | 0.73  | 0.79  | 0.458694  | 1.02   | 0.96  | 0.95 | 0.88  | 0.548124   | 0.66  | 0.59 | 0.66 | 0.64 | 0.0003985 |
| EXOS04   | Plate 04 | H12 | 54512  | NM_019037    | CAGCCAGCUGUUGCAU    | 0.89   | 0.60 | 0.65  | 0.71  | 0.680521  | 1.08   | 1.08  | 1.09 | 0.87  | 0.643233   | 0.70  | 0.65 | 0.67 | 0.70 | 0.043323  |
| EXOS04   | Plate 04 | H12 | 54512  | NM_019037    | COCACAGCUGUUGAAGCA  | 0.80   | 0.85 | 0.81  | 1.15  | 0.0004889 | 1.42   | 1.20  | 0.97 | 1.20  | 0.042413   | 1.30  | 0.85 | 1.15 | 1.10 | 3.295E-08 |
| FBA1     | Plate 04 | M03 | 8263   | NM_012151    | GGUACGUCUACCCACGAA  | 0.98   | 0.77 | 0.63  | 0.79  | 0.419295  | 0.99   | 0.76  | 0.69 | 0.81  | 0.0907205  | 0.57  | 0.55 | 0.47 | 0.53 | 2.144E-11 |
| FBA1     | Plate 04 | M03 | 8263   | NM_012151    | GCAACAAGCUAAGAAAGCG | 0.71   | 0.84 | 0.64  | 0.73  | 0.0702293 | -24.18 | -0.56 | 0.42 | -8.11 | 2.08E-08   | 0.55  | 1.13 | 1.11 | 0.83 | 0.0393744 |
| FBA1     | Plate 04 | O03 | 8263   | NM_012151    | GAGUUGGGCCUUGGUUA   | 0.60   | 0.65 | 0.57  | 0.65  | 0.000715  | 1.02   | 0.63  | 0.72 | 0.69  | 0.000443   | 0.70  | 0.68 | 0.60 | 0.66 | 0.0023543 |
| FBA1     | Plate 04 | O03 | 8263   | NM_012151    | GGAGCUCUUGCCUUGCA   | 1.24   | 1.01 | 1.14  | 0.71  | 0.000036  | 1.01   | 0.73  | 0.53 | 0.61  | 0.000036   | -0.01 | 0.4  | 0.6  | 0.51 | 1.481E-08 |
| FAMZL7   | Plate 04 | I10 | 284123 | NM_203392    | CACAGAAGGUCUGUUAU   | 0.70   | 0.55 | 0.57  | 0.57  | 3.007E-07 | 1.02   | 0.78  | 0.55 | 0.75  | 0.8101878  | 0.37  | 0.37 | 0.41 | 0.38 | 4.826E-34 |
| FAMZL7   | Plate 04 | J10 | 284123 | NM_203392    | CAACAGCCUUGCUAUGU   | 0.67   | 0.70 | 0.72  | 0.70  | 0.0177856 | 1.41   | 0.48  | 0.70 | 0.86  | 0.0402462  | 0.48  | 0.64 | 0.69 | 0.60 | 3.991E-06 |
| FAMZL7   | Plate 04 | K10 | 284123 | NM_203392    | ACACACGUAUACUUGU    | 0.71   | 0.71 | 0.72  | 0.71  | 0.0413089 | 1.74   | 0.52  | 1.04 | 0.77  | 0.0066397  | 0.43  | 0.53 | 0.50 | 0.56 | 2.13E-09  |
| FAMZL7   | Plate 04 | L10 | 284123 | NM_203392    | GGAGCUCUUGCCUUGCA   | 1.35   | 0.89 | 0.62  | 0.95  | 0.213881  | 0.71   | 1.11  | 0.76 | 0.86  | 0.258811   | 0.81  | 0.64 | 1.28 | 0.91 | 0.05982   |
| FAMZL7   | Plate 04 | M10 | 284123 | NM_203392    | CGUAGGUGGUCUUGUA    | 0.59   | 0.67 | 0.68  | 0.59  | 0.545419  | 0.93   | 0.61  | 0.76 | 0.71  | 0.000036   | 0.66  | 0.59 | 0.55 | 0.59 | 0.0251138 |
| FOXD4L6  | Plate 04 | B15 | 653404 | NM_001085476 | CGUUGGAGCAACACGAA   | 0.60   | 0.94 | 0.63  | 0.79  | 0.410283  | 0.77   | 0.55  | 0.72 | 0.72  | 0.0005655  | 0.81  | 0.74 | 0.71 | 0.67 | 0.0677639 |
| FOXD4L6  | Plate 04 | B15 | 653404 | NM_001085476 | UCACUACUACUUGUUA    | 0.62   | 0.75 | 0.57  | 0.71  | 0.0782629 | 0.67   | 0.80  | 0.75 | 0.74  | 0.0070034  | 0.84  | 0.69 | 0.91 | 0.90 | 0.019233  |
| FOXD4L6  | Plate 04 | C15 | 653404 | NM_001085476 | CAAGAACUUGUUGCAU    | 0.64   | 0.57 | 0.58  | 0.59  | 6.638E-06 | 0.52   | 0.75  | 1.10 | 0.79  | 0.0146374  | 0.89  | 0.69 | 0.77 | 0.72 | 0.129822  |
| GABR2    | Plate 04 | M10 | 2570   | NM_002043    | AAAGUUGUCUACUUGU    | 0.60   | 0.88 | 0.52  | 0.66  | 0.0014789 | 0.72   | 0.57  | 0.55 | 0.61  | 6.888E-07  | 0.38  | 0.51 | 0.38 | 0.42 | 2.25E-29  |
| GABR2    | Plate 04 | M10 | 2570   | NM_002043    | GGACUUGCUCUACUUG    | 0.95   | 0.81 | 0.89  | 0.95  | 0.3899044 | 1.18   | 0.93  | 1.11 | 1.07  | 0.0969777  | 0.75  | 0.78 | 0.71 | 0.77 | 0.650763  |
| GABR2    | Plate 04 | O10 | 2570   | NM_002043    | GAAGUUCUUGCUAUGU    | 0.65   | 0.81 | 0.42  | 0.63  | 1.682E-05 | 0.47   | 0.98  | 0.61 | 0.69  | 0.4955E-05 | 0.47  | 0.65 | 0.61 | 0.58 | 8.137E-08 |
| GABR2    | Plate 04 | P10 | 2570   | NM_002043    | GAUGGAGCUCUACUUGU   | 0.78   | 0.89 | 0.92  | 0.86  | 0.662145  | 1.08   | 0.93  | 1.10 | 1.04  | 0.201743   | 0.80  | 0.84 | 0.92 | 0.85 | 0.150318  |
| GALN2    | Plate 04 | A16 | 2570   | NM_004481    | GGUUGGUAUUAUGUAU    | 0.88   | 0.89 | 0.57  | 0.78  | 0.273539  | 0.94   | 0.92  | 0.57 | 0.81  | 0.0580554  | 0.97  | 0.99 | 0.68 | 0.88 | 0.8003345 |
| GALN2    | Plate 04 | B16 | 2569   | NM_004481    | GCACUUGUCUUGCCGAA   | 0.61   | 0.91 | 0.54  | 0.55  | 2.724E-08 | 0.69   | 0.49  | 0.48 | 0.85  | 3.386E-10  | 0.44  | 0.44 | 0.78 | 0.56 | 5.504E-11 |
| GALN2    | Plate 04 | C16 | 2569   | NM_004481    | GUJAGAAGUUCUUGUA    | 0.95   | 0.57 | 0.65  | 0.62  | 6.795E-06 | 0.94   | 0.77  | 0.94 | 0.88  | 0.529491   | 0.72  | 0.66 | 0.81 | 0.73 | 0.211378  |
| GALN2    | Plate 04 | D16 | 2569   | NM_004481    | GGAGAAGCAGUACUUGA   | 1.35   | 1.13 | -0.56 | 0.64  | 5.087E-06 | 1.38   | 1.14  | 1.23 | 1.25  | 0.0005034  | 1.14  | 0.66 | 1.12 | 0.98 | 0.000966  |
| GPX1     | Plate 04 | A03 | 2876   | NM_000581    | GAUGGAGCUCUACUUGA   | 0.74   | 0.77 | 0.61  | 0.71  | 0.0252146 | 1.00   | 0.88  | 1.08 | 0.98  | 0.493447   | 0.90  | 0.88 | 0.80 | 0.86 | 0.114652  |
| GPX1     | Plate 04 | B03 | 2876   | NM_000581    | UGAUUCCUACUAGUUA    | 0.78   | 0.72 | 0.45  | 0.65  | 0.000221  | 1.89   | 0.63  | 0.41 | 0.97  | 0.051962   | 0.92  | 0.59 | 0.83 | 0.78 | 0.712175  |
| GPX1     | Plate 04 | C03 | 2876   | NM_000581    | GGAGUUGGUAAGUUAU    | 1.29   | 0.59 | 0.27  | 0.71  | 3.513E-06 | 0.95   | 1.24  | 0.80 | 0.96  | 0.660572   | 1.06  | 0.66 | 0.98 | 0.90 | 0.0428531 |
| GPX1     | Plate 04 | D03 | 2876   | NM_000581    | CACACAGCUCUUGCAU    | -18.05 | 1.49 | -1.19 | 0.54  | 1.336E-06 | 1.24   | 0.68  | 0.68 | 1.24  | 0.0347867  | 0.66  | 0.54 | 1.15 | 0.43 | 0.194848  |
| HAGH     | Plate 04 | A10 | 3029   | NM_005326    | GGACCAUUGUUGCGUAU   | 0.45   | 0.68 | 0.49  | 0.54  | 1.221E-09 | 0.75   | 0.82  | 0.50 | 0.69  | 0.0001177  | 0.55  | 0.56 | 0.54 | 0.55 | 1.866E-09 |
| HAGH     | Plate 04 | B10 | 3029   | NM_005326    | GGACCAUUGUUGCUUG    | 0.86   | 0.71 | 0.78  | 0.78  | 0.424075  | 0.98   | 0.76  | 0.73 | 0.83  | 0.0141523  | 0.86  | 0.71 | 0.70 | 0.75 | 0.512121  |
| HAGH     | Plate 04 | C10 | 3029   | NM_005326    | GAGCUUGGUAUGUUAU    | 31.81  | 0.52 | 0.25  | 10.86 | 1.196E-19 | 0.98   | 0.91  | 0.77 | 0.89  | 0.55533    | 0.66  | 0.48 | 0.71 | 2.62 | 1.216E-18 |
| HAGH     | Plate 04 | D10 | 3029   | NM_005326    | GGUUGGUAUGUUAU      | 0.59   | 0.59 | 0.49  | 0.51  | 7.68E-07  | 0.93   | 0.84  | 0.83 | 0.82  | 0.006134   | 0.54  | 0.62 | 0.62 | 0.62 | 0.001513  |
| HOBX5    | Plate 04 | M16 | 3215   | NM_002147    | GCUCUUGCCUACUUAU    | 1.52   | 0.62 | -0.18 | 0.65  | 0.0694033 | 0.63   | 1.55  | 0.76 | 0.98  | 0.773912   | 0.73  | 0.79 | 1.04 | 0.85 | 1.205396  |
| HOBX5    | Plate 04 | N16 | 3215   | NM_002147    | UGAGAAGUUCACUACAG   | 0.94   | 0.84 | 0.66  | 0.81  | 0.697908  | 0.40   | 1.17  | 0.68 | 0.75  | 0.0003006  | 0.57  | 0.74 | 0.76 | 0.66 | 0.018646  |
| HOBX5    | Plate 04 | O16 | 3215   | NM_002147    | GGUUAUCCCGUACAGCA   | 0.88   | 0.66 | 0.68  | 0.67  | 0.004232  | 0.89   | 0.68  | 0.68 | 0.75  | 0.0091995  | 0.33  | 0.47 | 0.51 | 0.44 | 1.693E-24 |
| HOBX5    | Plate 04 | P16 | 3215   | NM_002147    | GACUUAUUGUAGUAGCA   | 0.59   | 0.59 | 0.51  | 0.56  | 1.119E-07 | 0.83   | 0.66  | 1.15 | 0.88  | 0.351712   | 0.74  | 0.78 | 0.65 | 0.72 | 0.26996   |
| IL17R2   | Plate 04 | M17 | 84818  | NM_032732    | GGUUGGUAUGUUAU      | 0.64   | 0.89 | 0.75  | 0.72  | 0.0373355 | 0.98   | 0.26  | 0.40 | 0.30  | 0.000102   | 0.22  | 0.21 | 0.20 | 0.21 | 0.70      |
| IL17R2   | Plate 04 | N17 | 84818  | NM_032732    | GCUCUUGCCUACUUAU    | 0.60   | 0.73 | 0.67  | 0.67  | 0.0026031 | 1.01   | 0.52  | 0.72 | 0.75  | 0.0033131  | 0.74  | 0.86 | 0.92 | 0.84 | 0.258633  |
| IL17R2   | Plate 04 | O17 | 84818  | NM_032732    | GCUAUUGGAGUAGUUGU   | 0.91   | 0.83 | 0.81  | 0.85  | 0.730523  | 1.12   | 0.96  | 0.92 | 1.00  | 0.399771   | 0.72  | 0.74 | 0.65 | 0.70 | 0.064386  |
| IL17R2   | Plate 04 | P17 | 84818  | NM_032732    | GACCCAGUACUUAUUAU   | 0.47   | 0.74 | 0.27  | 0.49  | 2.152E-16 | 1.17   | 0.43  | 1.10 | 0.90  | 0.149725   | 0.17  | 0.81 | 0.66 | 0.75 | 0.384893  |
| INS-IGF2 | Plate 04 | A08 | 723961 | NM_001042376 | CCAGUUGGUAUGUUAU    | 0.50   | 0.64 | 0.64  | 0.59  | 3.259E-06 | 0.83   | 0.60  | 0.51 | 0.65  | 6.762E-06  | 0.26  | 0.23 | 0.31 | 0.27 | 0         |
| INS-IGF2 | Plate 04 | B08 | 723961 | NM_001042376 | GGUUGGUAUGUUAU      | 0.75   | 0.78 | 0.93  | 0.73  | 0.0001355 | 0.85   | 0.80  | 0.40 | 0.80  | 0.0001355  | 0.64  | 0.68 | 0.64 | 0.68 | 0.0026865 |
| INS-IGF2 | Plate 04 | C08 | 723961 | NM_001042376 | GGUUGGUAUGUUAU      | 0.48   | 0.42 | -0.34 | 0.19  | 3.079E-12 | 0.84   | 0.47  | 0.89 | 0.70  | 0.0001963  | 0.66  | 0.68 | 0.65 | 0.73 | 0.21711   |
| INS-IGF2 | Plate 04 | D08 | 723961 | NM_001042376 | CCUUAAGACUUAUAAAA   | 0.83   | 0.72 | 0.72  | 0.76  | 0.206492  | 0.73   | 0.78  | 0.91 | 0.84  | 0.232219   | 0.83  | 0.68 | 0.85 | 0.72 | 0.127938  |
| IP04     | Plate 04 | I22 | 79711  | NM_024658    | GAUUAUUGGUAUGUUAU   | 0.69   | 0.63 | 0.51  | 0.61  | 1.773E-05 | 1.02   | 0.83  | 0.93 | 0.93  | 0.956207   | 0.64  | 0.57 | 0.60 | 0.60 | 8.517E-06 |
| IP04     | Plate 04 | J22 | 79711  | NM_024658    | AGUACAGGUGGUCGUAU   | 0.83   | 0.83 | 0.80  | 0.82  | 0.894491  | 0.65   | 0.72  | 0.77 | 0.71  | 0.0017697  | 0.37  | 0.36 | 0.48 | 0.40 | 3.074E-30 |
| IP04     | Plate 04 | K22 | 79711  | NM_024658    | GCUCUUGGUAUGUUAU    | 0.73   | 0.73 | 0.73  | 0.73  | 0.0001719 | 1.00   | 0.73  | 0.64 | 0.73  | 0.0001719  | 0.64  | 0.68 | 0.64 | 0.68 | 0.0001719 |
| IP04     | Plate 04 | L22 | 79711  | NM_024658    | AUGGAGCAGCUCGGGAU   | 0.46   | 0.43 | 0.42  | 0.44  | 1.748E-18 | 1.02   | 0.78  | 0.78 | 0.86  | 0.321993   | 0.49  | 0.51 | 0.51 | 0.50 | 5.553E-14 |
| JPZH     | Plate 04 | I06 | 57158  | NM_175913    | GGGGCAGCUCGAAUUAU   | 0.96   | 0.81 | 0.91  | 0.89  | 0.312948  | 1.00   | 1.05  | 1.04 | 1.00  | 0.414166   | 0.51  | 0.54 | 0.86 | 0.64 | 6.218E-05 |
| JPZH     | Plate 04 | J06 | 57158  | NM_175913    | AAGCAGGUGGUCGAAU    | 1.82   | 1.09 | 0.73  | 1.21  | 1.87E-05  | 1.10   | 1.22  | 0.59 | 0.97  | 0.973832   | 0.51  | 0.96 | 0.88 | 0.78 | 0.547175  |
| JPZH     | Plate 04 | K06 | 57158  | NM_175913    | GGAGUUGGUAUGUUAU    | 0.86   | 0.86 | 0.86  | 0.86  | 3.829E-07 | 0.96   | 0.92  | 0.73 | 0.87  | 0.407786   | 0.80  | 0.59 | 0.67 | 0.62 | 6.435E-05 |
| JPZH     | Plate 04 | L06 | 57158  | NM_175913    | UAGGAGCAGCUCGAAU    | 0.85   | 0.79 | 0.71  | 0.76  | 0.0131212 | 0.94   | 0.68  | 0.68 | 0.64  | 0.0001312  | 0.68  | 0.68 | 0.68 | 0.68 | 0.0119386 |
| KLHL17   | Plate 04 | M14 | 339451 | NM_198317    | GAACGUGGUAUGUUAU    | 0.79   | 0.67 | 0.55  | 0.67  | 0.0020307 | 0.77   | 0.70  | 0.97 | 0.81  | 0.0961334  | 0.76  | 0.75 | 0.68 | 0.73 | 0.225159  |
| KLHL17   | Plate 04 | N14 | 339451 | NM_198317    | GAAUCGUGGUAUGUUAU   | 1.20   | 0.90 | 0.85  | 0.99  | 0.0279523 | 0.40   | 0.54  | 0.47 | 0.47  | 5.365E-16  | 0.15  | 0.41 | 0.56 | 0.38 | 0         |
| KLHL17   | Plate 04 | O14 | 339451 | NM_198317    | GCAUUAUUGUAGUUAU    | 0.93   | 0.69 | 0.93  | 0.85  | 0.817352  | 0.54   | 0.54  | 0.35 | 0.44  | 0.326E-19  | 0.39  | 0.27 | 0.41 | 0.45 | 2.30E-07  |
| KLHL17   | Plate 04 | P14 | 339451 | NM_198317    | UCAGUUGGUAUGUUAU    | 3.95   | 0.62 | 0.66  | 0.58  | 6.624E-07 | 1.55   | 0.62  | 0.95 | 0.71  | 0.0005125  | 0.45  | 0.49 | 0.49 | 0.48 | 0.005078  |
| KRT31    | Plate 04 | A11 | 3881   | NM_002277    | GGUUGGUAUGUUAU      | 0.75   | 0.60 | 0.69  | 0.67  | 0.085164  | 0.62   | 0.68  | 0.68 | 0.55  | 0.0171     | 0.67  | 0.71 | 0.70 | 0.70 | 0.280817  |
| KRT31    | Plate 04 | B11 | 3881   | NM_002277    | UGAUUCC             |        |      |       |       |           |        |       |      |       |            |       |      |      |      |           |



|         |          |     |          |             |                        |      |      |       |       |           |          |      |       |      |           |          |      |      |      |           |           |
|---------|----------|-----|----------|-------------|------------------------|------|------|-------|-------|-----------|----------|------|-------|------|-----------|----------|------|------|------|-----------|-----------|
| SEZE    | Plate 04 | L13 | 124925   | NM_00108935 | UGGAGAGGACAGCGCAU      | 0.36 | 0.39 | 0.28  | 0.34  | 3.743E-34 | 0.31     | 1.07 | 0.51  | 0.63 | 1.077E-09 | 0.29     | 0.50 | 0.67 | 0.49 | 1.344E-19 |           |
| SLC17A1 | Plate 04 | I05 | 6568     | NM_005074   | CAAGAGGAGGACAGCGCAU    | 0.89 | 0.73 | 0.75  | 0.79  | 0.487048  | 1.13     | 0.58 | 1.04  | 0.92 | 0.534200  | 0.79     | 0.75 | 0.45 | 0.67 | 0.0008004 |           |
| SLC17A1 | Plate 04 | I05 | 6568     | NM_005074   | CAAGAGGAGGACAGCGCAU    | 0.89 | 0.73 | 0.75  | 0.79  | 0.487048  | 1.13     | 0.58 | 1.04  | 0.92 | 0.534200  | 0.79     | 0.75 | 0.45 | 0.67 | 0.0008004 |           |
| SLC17A1 | Plate 04 | I05 | 6568     | NM_005074   | CGUUAUUGGUGCCGGAUA     | 0.81 | 0.61 | 0.55  | 0.67  | 0.0011515 | 0.52     | 0.65 | 0.94  | 0.70 | 0.0002932 | 0.82     | 0.78 | 0.75 | 0.78 | 0.999274  |           |
| SLC30A8 | Plate 04 | L17 | 169026   | NM_173851   | GAACGUUUCUGUUAUAUGA    | 0.80 | 0.58 | 0.57  | 0.65  | 0.0004004 | 0.54     | 0.79 | 1.04  | 0.92 | 0.860205  | 0.57     | 0.66 | 0.36 | 0.53 | 7.294E-13 |           |
| SLC30A8 | Plate 04 | L17 | 169026   | NM_173851   | GGAGGAAUUGUUCUAAGAA    | 0.76 | 0.78 | 0.76  | 0.81  | 0.739999  | 1.04     | 0.78 | 0.92  | 0.92 | 0.790799  | 0.93     | 0.80 | 0.85 | 0.60 | 0.117445  |           |
| SLC30A8 | Plate 04 | L17 | 169026   | NM_173851   | GGAGGAAUUGUUCUAAGAA    | 0.76 | 0.78 | 0.76  | 0.81  | 0.739999  | 1.04     | 0.78 | 0.92  | 0.92 | 0.790799  | 0.93     | 0.80 | 0.85 | 0.60 | 0.117445  |           |
| SLC30A8 | Plate 04 | L17 | 169026   | NM_173851   | GGGUAUAAAAGAAAGCGCA    | 0.89 | 0.91 | 0.74  | 0.87  | 0.145263  | 0.92     | 0.66 | 1.00  | 0.86 | 0.281947  | 0.58     | 0.87 | 0.71 | 0.72 | 0.0075688 |           |
| SLC35B4 | Plate 04 | E16 | 84912    | NM_032826   | GAAGGAAGCCACAGCAUUA    | 2.58 | 1.00 | 0.13  | 1.23  | 0.0163506 | 1.08     | 1.17 | 0.82  | 1.62 | 0.305674  | 1.70     | 0.80 | 1.00 | 1.17 | 3.424E-09 |           |
| SLC35B4 | Plate 04 | E16 | 84912    | NM_032826   | GUACAGGUUUCUUCUAGAA    | 0.95 | 0.82 | 0.75  | 0.84  | 0.893837  | 1.04     | 0.82 | 1.12  | 0.89 | 0.526638  | 1.08     | 0.92 | 0.89 | 0.96 | 0.0052229 |           |
| SLC35B4 | Plate 04 | G16 | 84912    | NM_032826   | GAACAGUUCUUCUUCUAGAA   | 0.84 | 0.87 | 0.89  | 0.87  | 0.532011  | 1.05     | 1.35 | 0.72  | 1.04 | 0.334991  | 0.62     | 0.74 | 1.04 | 0.80 | 0.964087  |           |
| SLC35B4 | Plate 04 | H16 | 84912    | NM_032826   | GAAGGAAUUGUUCUUCUAGAA  | 0.95 | 0.87 | 0.89  | 0.87  | 0.532011  | 1.05     | 1.35 | 0.72  | 1.04 | 0.334991  | 0.62     | 0.74 | 1.04 | 0.80 | 0.964087  |           |
| SLC4A11 | Plate 04 | M06 | 83959    | NM_032034   | GAAGUUAUCUUCUUCUAGAA   | 0.70 | 0.67 | 0.44  | 0.60  | 0.3854-06 | 1.08     | 0.54 | 1.05  | 0.75 | 0.042262  | 0.68     | 0.75 | 0.42 | 0.61 | 3.312E-06 |           |
| SLC4A11 | Plate 04 | M06 | 83959    | NM_032034   | GAACUUCUUCUUCUUCUAGAA  | 0.99 | 0.91 | 0.84  | 0.91  | 0.182269  | 0.75     | 1.04 | 1.34  | 1.04 | 0.289822  | 0.86     | 0.83 | 0.79 | 0.82 | 0.359302  |           |
| SLC4A11 | Plate 04 | N06 | 83959    | NM_032034   | AAACAGGCGUUGGGGCAAA    | 0.62 | 0.69 | -0.56 | 0.25  | 0.0072219 | -0.45    | 1.58 | 0.88  | 0.67 | 0.1016328 | 0.86     | 0.62 | 2.25 | 1.15 | 0.0030308 |           |
| SLC4A11 | Plate 04 | P06 | 83959    | NM_032034   | CGACAGUUCUUCUUCUAGAA   | 0.93 | 0.93 | 0.83  | 0.90  | 0.282487  | 0.78     | 0.71 | 0.93  | 0.81 | 0.6849999 | 0.69     | 0.72 | 0.50 | 0.64 | 0.0019883 |           |
| SOX14   | Plate 04 | A20 | 8403     | NM_004189   | AGACUGGAGUUCUUCUAGAA   | 0.57 | 0.62 | 0.38  | 0.46  | 6.372E-17 | 0.89     | 0.45 | 0.35  | 0.56 | 8.148E-12 | 0.48     | 0.41 | 0.41 | 0.43 | 5.055E-24 |           |
| SOX14   | Plate 04 | B20 | 8403     | NM_004189   | CGUUAUUGGUGCCGGAUA     | 0.81 | 0.61 | 0.55  | 0.67  | 0.0011515 | 0.52     | 0.65 | 0.94  | 0.70 | 0.0002932 | 0.82     | 0.78 | 0.75 | 0.78 | 0.999274  |           |
| SOX14   | Plate 04 | C20 | 8403     | NM_004189   | GAACGUUUCUGUUAUAUGA    | 0.80 | 0.58 | 0.57  | 0.65  | 0.0004004 | 0.54     | 0.79 | 1.04  | 0.92 | 0.860205  | 0.57     | 0.66 | 0.36 | 0.53 | 7.294E-13 |           |
| SOX14   | Plate 04 | D20 | 8403     | NM_004189   | GGAGGAAUUGUUCUAAGAA    | 0.76 | 0.78 | 0.76  | 0.81  | 0.739999  | 1.04     | 0.78 | 0.92  | 0.92 | 0.790799  | 0.93     | 0.80 | 0.85 | 0.60 | 0.117445  |           |
| SPINK8  | Plate 04 | I25 | 64624    | NM_00108025 | GAAGAGGUGGUGCCGGAUA    | 0.82 | 0.67 | 0.36  | 0.52  | 5.485E-12 | 0.68     | 0.46 | 0.72  | 0.62 | 6.836E-07 | 0.43     | 0.56 | 0.47 | 0.49 | 2.581E-16 |           |
| SPINK8  | Plate 04 | J20 | 64624    | NM_00108025 | ACUUAUUGGUGCCGGAUA     | 0.65 | 0.44 | 0.46  | 0.52  | 2.483E-11 | 0.74     | 0.58 | 0.80  | 0.70 | 0.0009122 | 0.52     | 0.51 | 0.57 | 0.53 | 5.724E-11 |           |
| SPINK8  | Plate 04 | K20 | 64624    | NM_00108025 | GGGCUUAACUUAUUAUUA     | 0.63 | 0.66 | 0.52  | 0.60  | 1.03E-05  | 0.90     | 0.94 | 0.91  | 0.91 | 0.886179  | 0.79     | 0.88 | 0.58 | 0.75 | 3.24015   |           |
| SPINK8  | Plate 04 | L20 | 64624    | NM_00108025 | CGAAAGCCGCUUCUUCUAGAA  | 0.63 | 0.72 | 0.41  | 0.59  | 3.505E-07 | 0.66     | 1.11 | 1.05  | 0.94 | 0.883638  | 0.53     | 0.68 | 0.42 | 0.54 | 6.024E-11 |           |
| SPTB2N  | Plate 04 | H15 | 6712     | NM_006946   | GAAGGAAUUGUUCUUCUAGAA  | 0.89 | 0.82 | 0.75  | 0.85  | 7.4747147 | 1.07     | 1.03 | 0.73  | 0.82 | 0.113566  | 0.96     | 0.32 | 0.43 | 0.67 | 6.517E-38 |           |
| SPTB2N  | Plate 04 | O15 | 6712     | NM_006946   | CGACAGAAUUCUUCUAGAA    | 0.83 | 0.53 | 0.27  | 0.63  | 0.0429327 | 0.82     | 0.57 | 0.99  | 0.80 | 0.0429327 | 0.82     | 0.63 | 0.60 | 0.81 | 0.575E-31 |           |
| SPTB2N  | Plate 04 | P15 | 6712     | NM_006946   | GGAGGAAUUCUUCUUCUAGAA  | 0.83 | 0.67 | 0.69  | 0.73  | 0.0740339 | 1.02     | 0.91 | 0.95  | 0.96 | 0.966273  | 0.88     | 0.72 | 0.80 | 0.80 | 0.752E-31 |           |
| SUNS    | Plate 04 | A18 | 140732   | NM_080675   | ACACUUCUUCUUCUUCUAGAA  | 0.82 | 2.98 | -4.26 | -0.15 | 3.186E-07 | 0.53     | 2.69 | -0.42 | 0.93 | 0.0132951 | 0.44     | 0.78 | 2.22 | 3.35 | 0.038966  |           |
| SUNS    | Plate 04 | B18 | 140732   | NM_080675   | GUAAGUUCUUCUUCUUCUAGAA | 0.84 | 0.43 | -0.01 | 0.35  | 1.984E-07 | 0.82     | 1.14 | 0.19  | 0.72 | 3.502E-09 | 0.43     | 0.45 | 0.85 | 0.88 | 1.261E-09 |           |
| SUNS    | Plate 04 | C18 | 140732   | NM_080675   | NM_080675              | 0.79 | 0.58 | 0.79  | 0.61  | 0.69      | 0.79     | 0.52 | 0.96  | 0.70 | 0.0009122 | 0.52     | 0.51 | 0.57 | 0.53 | 5.724E-11 |           |
| SUNS    | Plate 04 | D18 | 140732   | NM_080675   | GAAGUUAUCUUCUUCUAGAA   | 0.72 | 0.51 | 0.51  | 0.58  | 4.142E-07 | 0.58     | 0.58 | 0.95  | 0.70 | 0.0002320 | 0.71     | 0.74 | 0.68 | 0.71 | 0.0942255 |           |
| SYCE1L  | Plate 04 | E07 | 10013968 | NM_00112979 | AGGGGAGGUGGUGCCGGAUA   | 1.08 | 0.82 | 0.74  | 0.88  | 0.510197  | 0.86     | 0.85 | 0.66  | 0.79 | 0.0477373 | 0.56     | 0.66 | 0.68 | 0.63 | 0.0022447 |           |
| SYCE1L  | Plate 04 | F07 | 10013968 | NM_00112979 | GAUUAUUGUUCUUCUAGAA    | 1.01 | 0.47 | 0.25  | 0.57  | 9.007E-13 | 0.45     | 0.54 | 0.66  | 0.70 | 0.0003995 | 0.94     | 0.59 | 0.93 | 0.82 | 0.68146   |           |
| SYCE1L  | Plate 04 | G07 | 10013968 | NM_00112979 | GUUAAGUUCUUCUUCUAGAA   | 3.62 | 0.85 | 0.68  | 1.71  | 2.521E-09 | 1.91     | 1.26 | 0.94  | 1.22 | 0.0026119 | 2.11     | 0.72 | 1.12 | 1.32 | 6.97E-13  |           |
| SYCE1L  | Plate 04 | H07 | 10013968 | NM_00112979 | CGUUAUUGGUGCCGGAUA     | 0.82 | 0.65 | 0.79  | 0.61  | 0.69      | 0.79     | 0.62 | 0.79  | 0.62 | 0.0427531 | 0.81     | 0.51 | 0.58 | 0.63 | 0.001058  |           |
| SYCF2   | Plate 04 | M19 | 10388    | NM_014258   | GAGAAGGUGGUGCCGGAUA    | 0.81 | 0.47 | 0.70  | 0.66  | 0.0005577 | 0.70     | 0.34 | 0.60  | 0.54 | 1.35E-11  | 0.63     | 0.55 | 0.51 | 0.56 | 1.468E-08 |           |
| SYCF2   | Plate 04 | N19 | 10388    | NM_014258   | CGGUAUUGGUGCCGGAUA     | 0.64 | 0.78 | 0.74  | 0.65  | 0.0006765 | 0.51     | 0.63 | 1.02  | 0.72 | 0.0004663 | 0.69     | 0.71 | 0.45 | 0.58 | 1.164E-07 |           |
| SYCF2   | Plate 04 | O19 | 10388    | NM_014258   | GAAGUUAUCUUCUUCUAGAA   | 0.83 | 0.71 | 0.69  | 0.74  | 0.128123  | 1.00     | 0.78 | 1.07  | 0.95 | 0.861713  | 0.74     | 0.73 | 0.62 | 0.70 | 0.0414561 |           |
| SYCF2   | Plate 04 | P19 | 10388    | NM_014258   | CGGUAUUGGUGCCGGAUA     | 0.70 | 0.82 | 0.71  | 0.74  | 0.13074   | 0.82     | 0.95 | 1.17  | 0.98 | 0.2026292 | 0.74     | 0.98 | 0.73 | 0.82 | 0.576932  |           |
| TANK    | Plate 04 | F04 | 10010    | NM_133484   | GAAGUUAUCUUCUUCUAGAA   | 0.57 | 0.65 | 0.36  | 0.46  | 3.88E-05  | 0.71     | 1.12 | 0.87  | 0.90 | 0.5732311 | 0.81     | 0.61 | 0.55 | 0.60 | 0.0012318 |           |
| TANK    | Plate 04 | F04 | 10010    | NM_133484   | CGACUUCUUCUUCUUCUAGAA  | 0.83 | 0.73 | 0.60  | 0.72  | 0.0420052 | 1.12     | 0.99 | 0.85  | 0.99 | 0.514434  | 0.77     | 0.70 | 0.71 | 0.73 | 0.19962   |           |
| TANK    | Plate 04 | G04 | 10010    | NM_133484   | CAACAGUUAUUCUUCUAGAA   | 0.87 | 0.63 | 0.60  | 0.69  | 0.0103471 | 0.63     | 0.72 | 0.59  | 0.65 | 1.74E-05  | 0.83     | 0.80 | 0.77 | 0.80 | 0.718263  |           |
| TANK    | Plate 04 | H04 | 10010    | NM_133484   | GAGCAGGAAUUCUUCUAGAA   | 0.91 | 0.73 | 0.69  | 0.77  | 0.329878  | 0.88     | 0.94 | 1.18  | 0.93 | 0.823058  | 0.73     | 0.83 | 0.68 | 0.77 | 0.67815   |           |
| TBKX    | Plate 04 | M21 | 6909     | NM_005994   | GUUAAGUUCUUCUUCUAGAA   | 0.48 | 0.74 | 0.41  | 0.51  | 6.276E-12 | 0.91     | 0.67 | 0.53  | 0.70 | 0.0003783 | 0.48     | 0.55 | 0.60 | 0.54 | 3.246E-10 |           |
| TBKX    | Plate 04 | N21 | 6909     | NM_005994   | GUUAAGUUCUUCUUCUAGAA   | 0.48 | 0.74 | 0.41  | 0.51  | 6.276E-12 | 0.91     | 0.67 | 0.53  | 0.70 | 0.0003783 | 0.48     | 0.55 | 0.60 | 0.54 | 3.246E-10 |           |
| TBKX    | Plate 04 | O21 | 6909     | NM_005994   | CAUUCUUCUUCUUCUUCUAGAA | 0.59 | 0.52 | 0.56  | 0.56  | 4.874E-08 | 0.92     | 0.80 | 0.76  | 0.82 | 0.161971  | 0.53     | 0.44 | 0.43 | 0.47 | 6.852E-19 |           |
| TBKX    | Plate 04 | P21 | 6909     | NM_005994   | CGUUAUUGGUGCCGGAUA     | 0.73 | 0.75 | 0.70  | 0.73  | 0.0731537 | 1.00     | 0.67 | 1.10  | 0.82 | 0.0861008 | 0.84     | 0.84 | 0.74 | 0.81 | 0.63184   |           |
| TCTE1   | Plate 04 | I21 | 202500   | NM_182539   | ACAGAGCCGCUUCUUCUAGAA  | 1.02 | 0.69 | 0.64  | 0.81  | 0.478179  | 1.23     | 1.06 | 0.95  | 1.00 | 0.0843009 | 0.83     | 0.67 | 0.76 | 0.75 | 0.471999  |           |
| TCTE1   | Plate 04 | J21 | 202500   | NM_182539   | GAAGGAAUUGUUCUUCUAGAA  | 0.57 | 1.48 | 0.59  | -0.60 | 0.48      | 0.236241 | 1.00 | 1.24  | 1.03 | 1.09      | 0.004411 | 1.13 | 0.75 | 1.01 | 0.96      | 0.0102393 |
| TCTE1   | Plate 04 | K21 | 202500   | NM_182539   | CGUUAUUGGUGCCGGAUA     | 0.83 | 0.53 | 0.27  | 0.64  | 0.0249327 | 0.82     | 0.57 | 0.99  | 0.80 | 0.0429327 | 0.82     | 0.63 | 0.60 | 0.81 | 0.575E-31 |           |
| TCTE1   | Plate 04 | L21 | 202500   | NM_182539   | CGUUAUUGGUGCCGGAUA     | 0.78 | 0.57 | 0.54  | 0.63  | 8.89E-05  | 1.46     | 0.85 | 1.01  | 1.10 | 0.0763217 | 0.88     | 0.68 | 0.62 | 0.73 | 0.144702  |           |
| TMCO6   | Plate 04 | I19 | 55       |             |                        |      |      |       |       |           |          |      |       |      |           |          |      |      |      |           |           |

|        |          |     |       |           |                    |      |      |      |      |            |      |      |      |      |            |      |      |      |      |            |
|--------|----------|-----|-------|-----------|--------------------|------|------|------|------|------------|------|------|------|------|------------|------|------|------|------|------------|
| CAD    | Plate 05 | O05 | 790   | NM_004341 | CCAACAGAAAGCGGAUU  | 0.92 | 0.66 | 0.77 | 0.78 | 0.0302681  | 0.41 | 0.50 | 0.51 | 0.47 | 4.616E-17  | 0.61 | 0.57 | 0.52 | 0.57 | 1.529E-09  |
| CAD    | Plate 05 | P05 | 790   | NM_004341 | AUUAAAGCCGCGGGGAU  | 1.09 | 1.05 | 0.98 | 1.04 | 0.0672713  | 0.99 | 0.49 | 1.05 | 0.84 | 0.0295914  | 0.78 | 0.76 | 0.81 | 0.78 | 0.610169   |
| CCPG1  | Plate 05 | H07 | 9236  | NM_004748 | CAAGAAAGGCGGCGGAA  | 0.55 | 0.62 | 0.62 | 0.54 | 0.562436   | 0.55 | 0.77 | 0.62 | 0.55 | 3.514E-05  | 0.77 | 0.57 | 0.54 | 0.63 | 6.594E-06  |
| CCPG1  | Plate 05 | J17 | 9236  | NM_004748 | GUUAUUUGUGAGGCGAAA | 1.01 | 0.82 | 0.90 | 0.84 | 0.723004   | 0.91 | 1.13 | 0.80 | 1.08 | 0.251446   | 1.07 | 0.76 | 0.75 | 0.84 | 0.7022     |
| CCPG1  | Plate 05 | K17 | 9236  | NM_004748 | GUUAUUUGUGAGGCGAAA | 0.81 | 0.59 | 0.49 | 0.63 | 0.1014E-07 | 1.01 | 0.71 | 0.81 | 0.84 | 0.0970505  | 0.81 | 0.78 | 0.64 | 0.74 | 0.139872   |
| CCPG1  | Plate 05 | L17 | 9236  | NM_004748 | CAAGAAAGGCGGCGGAA  | 0.73 | 0.87 | 0.81 | 0.80 | 0.0836817  | 0.87 | 1.11 | 1.13 | 1.03 | 0.412841   | 1.15 | 0.88 | 0.84 | 0.96 | 0.0061641  |
| CEP19  | Plate 05 | A07 | 84984 | NM_032898 | UAGAGAGCGUAUUCAGUU | 0.65 | 0.65 | 0.50 | 0.60 | 0.852E-09  | 1.04 | 1.13 | 0.98 | 0.98 | 0.848177   | 0.63 | 0.60 | 0.57 | 0.60 | 4.49E-07   |
| CEP19  | Plate 05 | A07 | 84984 | NM_032898 | CAAGAAAGGCGGCGGAA  | 0.41 | 0.43 | 0.41 | 0.35 | 0.0001172  | 0.69 | 0.73 | 0.61 | 0.76 | 0.0001172  | 0.69 | 0.60 | 0.50 | 0.60 | 1.265E-00  |
| CEP19  | Plate 05 | C07 | 84984 | NM_032898 | AAAUUUCGCGGCGGAAU  | 0.61 | 0.75 | 0.59 | 0.65 | 0.234E-06  | 0.85 | 1.03 | 0.50 | 0.86 | 0.0522325  | 0.62 | 0.60 | 0.36 | 0.52 | 0.70E-15   |
| CEP19  | Plate 05 | D07 | 84984 | NM_032898 | AAGAAUUAUCCGCGACAA | 0.81 | 1.16 | 0.85 | 0.94 | 0.780162   | 0.67 | 0.85 | 0.54 | 0.75 | 0.017371   | 0.48 | 0.87 | 1.00 | 0.78 | 0.198979   |
| CLEC3B | Plate 05 | M09 | 7123  | NM_003278 | GAUCUGCGGCGGCGGUA  | 0.91 | 1.54 | 0.91 | 1.12 | 0.0156552  | 1.36 | 1.10 | 0.96 | 1.14 | 0.0756454  | 1.02 | 1.21 | 0.81 | 1.01 | 0.0020257  |
| CLEC3B | Plate 05 | N09 | 7123  | NM_003278 | CGCAUACGUGGCGGCGUA | 1.01 | 0.70 | 0.33 | 0.68 | 0.243E-08  | 1.94 | 0.87 | 0.70 | 1.17 | 0.259106   | 1.90 | 0.80 | 0.79 | 1.16 | 0.628E-06  |
| CLEC3B | Plate 05 | P09 | 7123  | NM_003278 | GAUCUGCGGCGGCGGUA  | 0.62 | 0.62 | 0.62 | 0.62 | 0.0001172  | 0.69 | 0.54 | 0.80 | 0.68 | 0.1861E-05 | 0.47 | 0.40 | 0.42 | 0.43 | 8.513E-09  |
| CLEC3B | Plate 05 | P09 | 7123  | NM_003278 | CGAAGUGUGGCGGCGGUA | 0.77 | 0.16 | 0.01 | 0.31 | 2.115E-27  | 0.69 | 0.54 | 0.80 | 0.68 | 0.1861E-05 | 0.47 | 0.40 | 0.37 | 0.28 | 1E-20      |
| CLEC4M | Plate 05 | I05 | 10332 | NM_014257 | GAUGUGGCGGCGGCGGUA | 0.66 | 0.34 | 0.55 | 0.51 | 1.615E-16  | 0.61 | 0.58 | 0.62 | 0.60 | 0.4118E-08 | 0.88 | 0.56 | 0.49 | 0.64 | 1.08E-05   |
| CLEC4M | Plate 05 | I05 | 10332 | NM_014257 | CGAAUUAUUAUUAUUAU  | 0.90 | 0.75 | 1.07 | 0.90 | 0.0856999  | 1.20 | 0.86 | 0.92 | 0.99 | 0.785746   | 0.56 | 0.68 | 0.47 | 0.57 | 1.088E-09  |
| CLEC4M | Plate 05 | K05 | 10332 | NM_014257 | GUGGAGGCGGCGGCGGUA | 1.10 | 0.96 | 0.64 | 0.90 | 0.628733   | 1.18 | 0.88 | 0.72 | 0.92 | 0.504627   | 0.95 | 0.89 | 0.66 | 0.85 | 0.470752   |
| CLEC4M | Plate 05 | L05 | 10332 | NM_014257 | GAUUAUUAUUAUUAUUA  | 0.71 | 0.68 | 0.57 | 0.61 | 0.0001198  | 0.85 | 0.95 | 0.93 | 0.91 | 0.0159386  | 0.80 | 0.84 | 0.74 | 0.83 | 0.66002031 |
| CLOCK  | Plate 05 | I09 | 9575  | NM_004898 | CAAGAAGGUGUAUUAUUA | 0.56 | 0.61 | 0.46 | 0.54 | 8.971E-13  | 0.78 | 0.50 | 0.95 | 0.74 | 0.0006118  | 0.85 | 0.89 | 0.62 | 0.79 | 0.525746   |
| CLOCK  | Plate 05 | J09 | 9575  | NM_004898 | CGUGAAGGUGUAUUAUUA | 0.61 | 0.58 | 0.54 | 0.58 | 0.4018E-10 | 0.89 | 0.97 | 0.89 | 0.92 | 0.575513   | 0.51 | 0.49 | 0.36 | 0.46 | 1.563E-23  |
| CLOCK  | Plate 05 | K09 | 9575  | NM_004898 | GGCAAAUUAUUAUUAUUA | 0.48 | 0.52 | 0.43 | 0.48 | 6.382E-19  | 0.59 | 0.68 | 0.88 | 0.71 | 0.0002994  | 0.45 | 0.53 | 0.56 | 0.52 | 8.606E-15  |
| CLOCK  | Plate 05 | L09 | 9575  | NM_004898 | GACUUAUUAUUAUUAUUA | 0.60 | 0.60 | 0.43 | 0.54 | 5.441E-13  | 0.66 | 0.70 | 0.97 | 0.78 | 0.0073911  | 0.48 | 0.64 | 0.31 | 0.47 | 1.009E-23  |
| CYP81  | Plate 05 | I04 | 1582  | NM_004391 | AAUUAUUAUUAUUAUUA  | 0.60 | 0.70 | 0.52 | 0.61 | 2.074E-15  | 0.83 | 0.82 | 0.89 | 0.85 | 0.135052   | 0.83 | 0.79 | 0.81 | 0.81 | 0.943614   |
| CYP81  | Plate 05 | I04 | 1582  | NM_004391 | GUUAUUAUUAUUAUUAU  | 0.51 | 0.60 | 0.42 | 0.57 | 0.085E-12  | 1.26 | 0.30 | 0.51 | 0.69 | 2.095E-09  | 0.52 | 0.27 | 0.54 | 0.44 | 5.525E-28  |
| CYP81  | Plate 05 | K04 | 1582  | NM_004391 | CGUUAUUAUUAUUAUUA  | 0.61 | 0.58 | 0.54 | 0.58 | 0.4018E-10 | 0.89 | 0.97 | 0.88 | 0.92 | 0.575513   | 0.51 | 0.49 | 0.36 | 0.46 | 1.563E-23  |
| CYP81  | Plate 05 | L04 | 1582  | NM_004391 | GGCAAAUUAUUAUUAUUA | 0.48 | 0.52 | 0.43 | 0.48 | 6.382E-19  | 0.59 | 0.68 | 0.88 | 0.71 | 0.0002994  | 0.45 | 0.53 | 0.56 | 0.52 | 8.606E-15  |
| CYTH1  | Plate 05 | N08 | 9267  | NM_017456 | CGAAUUAUUAUUAUUAU  | 0.60 | 0.60 | 0.43 | 0.54 | 5.441E-13  | 0.66 | 0.70 | 0.97 | 0.78 | 0.0073911  | 0.48 | 0.64 | 0.31 | 0.47 | 1.009E-23  |
| CYTH1  | Plate 05 | N08 | 9267  | NM_017456 | AAUUAUUAUUAUUAUUA  | 0.61 | 0.61 | 0.46 | 0.54 | 8.971E-13  | 0.78 | 0.50 | 0.95 | 0.74 | 0.0006118  | 0.85 | 0.89 | 0.62 | 0.79 | 0.525746   |
| CYTH1  | Plate 05 | O08 | 9267  | NM_017456 | CGUGAAGGUGUAUUAUUA | 0.61 | 0.58 | 0.54 | 0.58 | 0.4018E-10 | 0.89 | 0.97 | 0.88 | 0.92 | 0.575513   | 0.51 | 0.49 | 0.36 | 0.46 | 1.563E-23  |
| CYTH1  | Plate 05 | O08 | 9267  | NM_017456 | GGCAAAUUAUUAUUAUUA | 0.48 | 0.52 | 0.43 | 0.48 | 6.382E-19  | 0.59 | 0.68 | 0.88 | 0.71 | 0.0002994  | 0.45 | 0.53 | 0.56 | 0.52 | 8.606E-15  |
| CYTH1  | Plate 05 | O08 | 9267  | NM_017456 | CGAAUUAUUAUUAUUAU  | 0.61 | 0.61 | 0.46 | 0.54 | 8.971E-13  | 0.78 | 0.50 | 0.95 | 0.74 | 0.0006118  | 0.85 | 0.89 | 0.62 | 0.79 | 0.525746   |
| CYTH1  | Plate 05 | O08 | 9267  | NM_017456 | GGUGAAGGUGUAUUAUUA | 0.61 | 0.58 | 0.54 | 0.58 | 0.4018E-10 | 0.89 | 0.97 | 0.88 | 0.92 | 0.575513   | 0.51 | 0.49 | 0.36 | 0.46 | 1.563E-23  |
| CYTH1  | Plate 05 | O08 | 9267  | NM_017456 | GGCAAAUUAUUAUUAUUA | 0.48 | 0.52 | 0.43 | 0.48 | 6.382E-19  | 0.59 | 0.68 | 0.88 | 0.71 | 0.0002994  | 0.45 | 0.53 | 0.56 | 0.52 | 8.606E-15  |
| CYTH1  | Plate 05 | O08 | 9267  | NM_017456 | CGAAUUAUUAUUAUUAU  | 0.61 | 0.61 | 0.46 | 0.54 | 8.971E-13  | 0.78 | 0.50 | 0.95 | 0.74 | 0.0006118  | 0.85 | 0.89 | 0.62 | 0.79 | 0.525746   |
| CYTH1  | Plate 05 | O08 | 9267  | NM_017456 | GGUGAAGGUGUAUUAUUA | 0.61 | 0.58 | 0.54 | 0.58 | 0.4018E-10 | 0.89 | 0.97 | 0.88 | 0.92 | 0.575513   | 0.51 | 0.49 | 0.36 | 0.46 | 1.563E-23  |
| CYTH1  | Plate 05 | O08 | 9267  | NM_017456 | GGCAAAUUAUUAUUAUUA | 0.48 | 0.52 | 0.43 | 0.48 | 6.382E-19  | 0.59 | 0.68 | 0.88 | 0.71 | 0.0002994  | 0.45 | 0.53 | 0.56 | 0.52 | 8.606E-15  |
| CYTH1  | Plate 05 | O08 | 9267  | NM_017456 | CGAAUUAUUAUUAUUAU  | 0.61 | 0.61 | 0.46 | 0.54 | 8.971E-13  | 0.78 | 0.50 | 0.95 | 0.74 | 0.0006118  | 0.85 | 0.89 | 0.62 | 0.79 | 0.525746   |
| CYTH1  | Plate 05 | O08 | 9267  | NM_017456 | GGUGAAGGUGUAUUAUUA | 0.61 | 0.58 | 0.54 | 0.58 | 0.4018E-10 | 0.89 | 0.97 | 0.88 | 0.92 | 0.575513   | 0.51 | 0.49 | 0.36 | 0.46 | 1.563E-23  |
| CYTH1  | Plate 05 | O08 | 9267  | NM_017456 | GGCAAAUUAUUAUUAUUA | 0.48 | 0.52 | 0.43 | 0.48 | 6.382E-19  | 0.59 | 0.68 | 0.88 | 0.71 | 0.0002994  | 0.45 | 0.53 | 0.56 | 0.52 | 8.606E-15  |
| CYTH1  | Plate 05 | O08 | 9267  | NM_017456 | CGAAUUAUUAUUAUUAU  | 0.61 | 0.61 | 0.46 | 0.54 | 8.971E-13  | 0.78 | 0.50 | 0.95 | 0.74 | 0.0006118  | 0.85 | 0.89 | 0.62 | 0.79 | 0.525746   |
| CYTH1  | Plate 05 | O08 | 9267  | NM_017456 | GGUGAAGGUGUAUUAUUA | 0.61 | 0.58 | 0.54 | 0.58 | 0.4018E-10 | 0.89 | 0.97 | 0.88 | 0.92 | 0.575513   | 0.51 | 0.49 | 0.36 | 0.46 | 1.563E-23  |
| CYTH1  | Plate 05 | O08 | 9267  | NM_017456 | GGCAAAUUAUUAUUAUUA | 0.48 | 0.52 | 0.43 | 0.48 | 6.382E-19  | 0.59 | 0.68 | 0.88 | 0.71 | 0.0002994  | 0.45 | 0.53 | 0.56 | 0.52 | 8.606E-15  |
| CYTH1  | Plate 05 | O08 | 9267  | NM_017456 | CGAAUUAUUAUUAUUAU  | 0.61 | 0.61 | 0.46 | 0.54 | 8.971E-13  | 0.78 | 0.50 | 0.95 | 0.74 | 0.0006118  | 0.85 | 0.89 | 0.62 | 0.79 | 0.525746   |
| CYTH1  | Plate 05 | O08 | 9267  | NM_017456 | GGUGAAGGUGUAUUAUUA | 0.61 | 0.58 | 0.54 | 0.58 | 0.4018E-10 | 0.89 | 0.97 | 0.88 | 0.92 | 0.575513   | 0.51 | 0.49 | 0.36 | 0.46 | 1.563E-23  |
| CYTH1  | Plate 05 | O08 | 9267  | NM_017456 | GGCAAAUUAUUAUUAUUA | 0.48 | 0.52 | 0.43 | 0.48 | 6.382E-19  | 0.59 | 0.68 | 0.88 | 0.71 | 0.0002994  | 0.45 | 0.53 | 0.56 | 0.52 | 8.606E-15  |
| CYTH1  | Plate 05 | O08 | 9267  | NM_017456 | CGAAUUAUUAUUAUUAU  | 0.61 | 0.61 | 0.46 | 0.54 | 8.971E-13  | 0.78 | 0.50 | 0.95 | 0.74 | 0.0006118  | 0.85 | 0.89 | 0.62 | 0.79 | 0.525746   |
| CYTH1  | Plate 05 | O08 | 9267  | NM_017456 | GGUGAAGGUGUAUUAUUA | 0.61 | 0.58 | 0.54 | 0.58 | 0.4018E-10 | 0.89 | 0.97 | 0.88 | 0.92 | 0.575513   | 0.51 | 0.49 | 0.36 | 0.46 | 1.563E-23  |
| CYTH1  | Plate 05 | O08 | 9267  | NM_017456 | GGCAAAUUAUUAUUAUUA | 0.48 | 0.52 | 0.43 | 0.48 | 6.382E-19  | 0.59 | 0.68 | 0.88 | 0.71 | 0.0002994  | 0.45 | 0.53 | 0.56 | 0.52 | 8.606E-15  |
| CYTH1  | Plate 05 | O08 | 9267  | NM_017456 | CGAAUUAUUAUUAUUAU  | 0.61 | 0.61 | 0.46 | 0.54 | 8.971E-13  | 0.78 | 0.50 | 0.95 | 0.74 | 0.0006118  | 0.85 | 0.89 | 0.62 | 0.79 | 0.525746   |
| CYTH1  | Plate 05 | O08 | 9267  | NM_017456 | GGUGAAGGUGUAUUAUUA | 0.61 | 0.58 | 0.54 | 0.58 | 0.4018E-10 | 0.89 | 0.97 | 0.88 | 0.92 | 0.575513   | 0.51 | 0.49 | 0.36 | 0.46 | 1.563E-23  |
| CYTH1  | Plate 05 | O08 | 9267  | NM_017456 | GGCAAAUUAUUAUUAUUA | 0.48 | 0.52 | 0.43 | 0.48 | 6.382E-19  | 0.59 | 0.68 | 0.88 | 0.71 | 0.0002994  | 0.45 | 0.53 | 0.56 | 0.52 | 8.606E-15  |
| CYTH1  | Plate 05 | O08 | 9267  | NM_017456 | CGAAUUAUUAUUAUUAU  | 0.61 | 0.61 | 0.46 | 0.54 | 8.971E-13  | 0.78 | 0.50 | 0.95 | 0.74 | 0.0006118  | 0.85 | 0.89 | 0.62 | 0.79 | 0.525746   |
| CYTH1  | Plate 05 | O08 | 9267  | NM_017456 | GGUGAAGGUGUAUUAUUA | 0.61 | 0.58 | 0.54 | 0.58 | 0.4018E-10 | 0.89 | 0.97 | 0.88 | 0.92 | 0.575513   | 0.51 | 0.49 | 0.36 | 0.46 | 1.563E-23  |
| CYTH1  | Plate 05 | O08 | 9267  | NM_017456 | GGCAAAUUAUUAUUAUUA | 0.48 | 0.52 | 0.43 | 0.48 | 6.382E-19  | 0.59 | 0.68 | 0.88 | 0.71 | 0.0002994  | 0.45 | 0.53 | 0.56 | 0.52 | 8.606E-15  |
| CYTH1  | Plate 05 | O08 | 9267  | NM_017456 | CGAAUUAUUAUUAUUAU  | 0.61 | 0.61 | 0.46 | 0.54 | 8.971E-13  | 0.78 | 0.50 | 0.95 | 0.74 | 0.0006118  | 0.85 | 0.89 | 0.62 | 0.79 | 0.525746   |
| CYTH1  | Plate 05 | O08 | 9267  | NM_017456 | GGUGAAGGUGUAUUAUUA | 0.61 | 0.58 | 0.54 | 0.58 | 0.4018E-10 | 0.89 | 0.97 | 0.88 | 0.92 | 0.575513   | 0.51 | 0.49 | 0.36 | 0.46 | 1.563E-23  |
| CYTH1  | Plate 05 | O08 | 9267  | NM_017456 | GGCAAAUUAUUAUUAUUA | 0.48 | 0.52 | 0.43 | 0.48 | 6.382E-19  | 0.59 | 0.68 | 0.88 | 0.71 | 0.0002994  | 0.45 | 0.53 | 0.56 | 0.52 | 8.606E-15  |
| CYTH1  | Plate 05 | O08 | 9     |           |                    |      |      |      |      |            |      |      |      |      |            |      |      |      |      |            |

|         |          |     |        |           |                     |      |      |       |      |           |       |       |       |       |            |      |      |      |      |           |           |      |      |      |           |           |
|---------|----------|-----|--------|-----------|---------------------|------|------|-------|------|-----------|-------|-------|-------|-------|------------|------|------|------|------|-----------|-----------|------|------|------|-----------|-----------|
| PRRSAP2 | Plate 05 | J06 | 5636   | NM_002767 | CCAAUCAAUCCACALGA   | 0.51 | 0.37 | 0.39  | 0.43 | 2.78E-26  | 0.84  | 1.06  | 0.76  | 0.88  | 0.289576   | 0.47 | 0.42 | 0.38 | 0.42 | 2.82E-28  | 0.77      | 0.79 | 0.80 | 0.78 | 0.670531  |           |
| PRRSAP2 | Plate 05 | K06 | 5636   | NM_002767 | GAAGAGGUGCUUAUUAAGA | 0.64 | 0.62 | 0.47  | 0.58 | 1.97E-10  | 0.59  | 0.66  | 1.02  | 0.75  | 0.0160548  | 1.07 | 0.84 | 0.81 | 0.91 | 0.81      | 0.6230426 | 0.91 | 0.84 | 0.81 | 0.81      | 0.6230426 |
| R3HDM2  | Plate 05 | I18 | 22864  | NM_014925 | CAACAGCCACCCUUGAAGA | 0.64 | 0.65 | 0.55  | 0.62 | 8.303E-08 | 0.71  | 0.74  | 1.07  | 0.70  | 0.01005498 | 0.66 | 0.67 | 0.69 | 0.67 | 0.67      | 0.67      | 0.69 | 0.67 | 0.69 | 0.67      | 0.602115  |
| R3HDM2  | Plate 05 | J18 | 22864  | NM_014925 | GGAGGCGUCCUUAUUAU   | 0.75 | 0.67 | 0.81  | 0.74 | 0.005154A | 0.85  | 0.89  | 0.76  | 0.83  | 0.0892208  | 0.60 | 0.51 | 0.51 | 0.51 | 0.51      | 0.51      | 0.51 | 0.51 | 0.51 | 0.51      | 0.51      |
| R3HDM2  | Plate 05 | K18 | 22864  | NM_014925 | GUCGAAUAGGCUUAGUUC  | 0.50 | 0.46 | 0.47  | 0.48 | 8.56E-19  | 1.02  | 0.71  | 0.68  | 0.81  | 0.0209993  | 0.61 | 0.49 | 0.31 | 0.40 | 1.34E-33  | 0.40      | 0.49 | 0.31 | 0.40 | 1.34E-33  |           |
| R3HDM2  | Plate 05 | L18 | 22864  | NM_014925 | CCAGUGUCCUUAUUAUUA  | 1.04 | 0.82 | 0.56  | 0.81 | 0.0394827 | 0.80  | 1.71  | 0.67  | 1.08  | 0.7162021  | 1.09 | 0.92 | 0.67 | 0.89 | 0.162021  | 0.89      | 0.92 | 0.67 | 0.89 | 0.162021  |           |
| RAB21   | Plate 05 | N11 | 23011  | NM_014999 | CGAGGAGUCCUUAUUAU   | 0.72 | 0.73 | 0.67  | 0.72 | 0.0149999 | 0.72  | 0.73  | 0.67  | 0.72  | 0.0149999  | 0.72 | 0.73 | 0.67 | 0.72 | 0.0149999 | 0.72      | 0.73 | 0.67 | 0.72 | 0.0149999 |           |
| RAB21   | Plate 05 | O11 | 23011  | NM_014999 | GAGGAAUCCUUAUUAUUA  | 1.00 | 0.61 | 0.50  | 0.60 | 0.131E-09 | 0.85  | 1.07  | 0.67  | 1.00  | 0.333302   | 0.76 | 0.58 | 0.72 | 0.69 | 0.043696  | 0.69      | 0.58 | 0.72 | 0.69 | 0.043696  |           |
| RAB21   | Plate 05 | P11 | 23011  | NM_014999 | CUACGAGAUUCAAUUAU   | 0.79 | 0.82 | 0.80  | 0.80 | 0.0898157 | 0.68  | 0.83  | 0.97  | 0.83  | 0.058499   | 0.71 | 0.71 | 0.60 | 0.68 | 0.017888  | 0.68      | 0.83 | 0.97 | 0.83 | 0.058499  |           |
| RAB21   | Plate 05 | Q11 | 23011  | NM_014999 | CAAGGAGAUUCAAUUAU   | 0.68 | 0.73 | 0.64  | 0.76 | 6.71E-07  | -0.03 | -0.19 | 0.66  | 0.14  | 0.0079562  | 0.53 | 0.60 | 0.41 | 0.51 | 2.905E-15 | 0.53      | 0.60 | 0.41 | 0.51 | 2.905E-15 |           |
| RAB21   | Plate 05 | E05 | 9978   | NM_014248 | CAAGCGUUAUUAUUAUUA  | 0.71 | 0.56 | 0.62  | 0.63 | 3.587E-07 | 0.60  | 1.07  | 0.72  | 0.90  | 0.333302   | 0.72 | 0.30 | 0.55 | 0.42 | 1.749E-30 | 0.72      | 0.30 | 0.55 | 0.42 | 1.749E-30 |           |
| RAB21   | Plate 05 | E05 | 9978   | NM_014248 | CCGAAUUAUUAUUAUUA   | 0.77 | 0.79 | 0.72  | 0.73 | 0.0193181 | 0.85  | 0.93  | 0.76  | 0.81  | 0.0269289  | 0.74 | 0.59 | 0.77 | 0.69 | 0.3779289 | 0.74      | 0.59 | 0.77 | 0.69 | 0.3779289 |           |
| RAB21   | Plate 05 | G05 | 9978   | NM_014248 | CAAGAAAGGCUUUAUUAU  | 0.75 | 0.66 | 0.45  | 0.62 | 2.81E-08  | 0.64  | 1.09  | 0.78  | 0.67  | 1.505E-05  | 0.40 | 0.45 | 0.42 | 0.43 | 4.62E-28  | 0.40      | 0.45 | 0.42 | 0.43 | 4.62E-28  |           |
| RAB21   | Plate 05 | H05 | 9978   | NM_014248 | CAACGAGAGUUGGAAUUC  | 0.74 | 0.58 | 0.84  | 0.72 | 0.0007974 | 1.06  | 1.06  | 0.70  | 0.90  | 0.329891   | 0.53 | 0.54 | 0.60 | 0.56 | 2.95E-10  | 0.53      | 0.54 | 0.60 | 0.56 | 2.95E-10  |           |
| RFCA    | Plate 05 | A06 | 5984   | NM_002916 | GGGAAUUAUUAUUAUUA   | 0.60 | 0.47 | 0.43  | 0.50 | 8.203E-17 | 0.91  | 1.02  | 0.80  | 0.94  | 0.7717515  | 0.50 | 0.53 | 0.43 | 0.49 | 4.78E-18  | 0.50      | 0.53 | 0.43 | 0.49 | 4.78E-18  |           |
| RFCA    | Plate 05 | B06 | 5984   | NM_002916 | CAUUCUCCUUAUUAUUA   | 0.79 | 0.69 | 0.97  | 0.82 | 0.108691  | 0.83  | 0.92  | 0.85  | 0.87  | 0.221341   | 0.72 | 0.70 | 1.23 | 0.88 | 0.343222  | 0.72      | 0.70 | 1.23 | 0.88 | 0.343222  |           |
| RFCA    | Plate 05 | C06 | 5984   | NM_002916 | CGGAGAGUCCUUAUUAU   | 1.49 | 1.10 | 0.83  | 1.14 | 0.009595  | 1.03  | 0.76  | 0.68  | 0.82  | 0.0452404  | 0.75 | 0.68 | 0.88 | 0.60 | 0.0403888 | 0.75      | 0.68 | 0.88 | 0.60 | 0.0403888 |           |
| RFCA    | Plate 05 | D06 | 5984   | NM_002916 | GAAGGCGUCCUUAUUAU   | 0.47 | 0.43 | 0.37  | 0.42 | 6.042E-26 | 0.71  | 0.87  | 0.65  | 0.75  | 0.0027769  | 0.38 | 0.42 | 0.33 | 0.38 | 0         | 0.38      | 0.42 | 0.33 | 0.38 | 0         |           |
| RMBP2   | Plate 05 | I10 | 23504  | NM_015347 | UAAAGCCUUAUUAUUAU   | 0.76 | 0.87 | 0.75  | 0.79 | 0.0577446 | 0.95  | 0.93  | 1.12  | 1.00  | 0.634346   | 0.52 | 0.62 | 0.57 | 0.57 | 2.696E-09 | 0.52      | 0.62 | 0.57 | 0.57 | 2.696E-09 |           |
| RMBP2   | Plate 05 | J10 | 23504  | NM_015347 | GUCUUGGAGUCCUUAUUA  | 0.65 | 0.48 | 0.43  | 0.52 | 3.635E-15 | 0.75  | 0.83  | 0.83  | 0.80  | 0.0340531  | 0.57 | 0.63 | 0.50 | 0.57 | 1.96E-09  | 0.57      | 0.63 | 0.50 | 0.57 | 1.96E-09  |           |
| RMBP2   | Plate 05 | K10 | 23504  | NM_015347 | GGCCGAGUCCUUAUUAU   | 0.25 | 0.25 | 0.70  | 0.56 | 3.504E-12 | 0.92  | 0.95  | 0.85  | 0.91  | 0.48877    | 0.62 | 0.71 | 0.99 | 0.78 | 0.293072  | 0.62      | 0.71 | 0.99 | 0.78 | 0.293072  |           |
| RMBP2   | Plate 05 | L10 | 23504  | NM_015347 | CAUUGUCCUUAUUAUUA   | 0.62 | 0.72 | 0.62  | 0.65 | 5.089E-06 | 0.87  | 0.88  | 1.00  | 0.92  | 0.569894   | 0.74 | 0.79 | 0.63 | 0.72 | 0.0449493 | 0.74      | 0.79 | 0.63 | 0.72 | 0.0449493 |           |
| RNF11   | Plate 05 | E10 | 54778  | NM_017610 | CGAGAUUUGUUAUUAAGA  | 0.69 | 0.61 | 0.58  | 0.63 | 2.834E-07 | 1.00  | 1.26  | 0.86  | 1.11  | 0.106738   | 0.72 | 0.83 | 0.73 | 0.76 | 0.295768  | 0.72      | 0.83 | 0.73 | 0.76 | 0.295768  |           |
| RNF11   | Plate 05 | F10 | 54778  | NM_017610 | GAGUUGUUAUUAUUAU    | 1.00 | 0.74 | 0.81  | 0.75 | 0.0079726 | 0.62  | 0.83  | 0.98  | 1.14  | 0.118753   | 0.74 | 0.77 | 0.62 | 0.74 | 0.127693  | 0.74      | 0.77 | 0.62 | 0.74 | 0.127693  |           |
| RNF11   | Plate 05 | G10 | 54778  | NM_017610 | AGAGGAAUUAUUAUUAU   | 0.67 | 0.64 | 0.59  | 0.63 | 6.654E-07 | 0.56  | 0.72  | 0.84  | 0.70  | 0.0001574  | 0.83 | 0.59 | 0.59 | 0.54 | 3.938E-05 | 0.83      | 0.59 | 0.59 | 0.54 | 3.938E-05 |           |
| RNF11   | Plate 05 | H10 | 54778  | NM_017610 | AGAGGAAUUAUUAUUAU   | 0.60 | 0.62 | 0.93  | 0.91 | 0.9134961 | 0.82  | 0.93  | 0.85  | 0.87  | 0.219402   | 1.00 | 0.76 | 0.64 | 0.87 | 0.265083  | 1.00      | 0.76 | 0.64 | 0.87 | 0.265083  |           |
| RNF208  | Plate 05 | I19 | 727800 | NM_031297 | GGAGGAGUCCUUAUUAU   | 0.50 | 0.52 | 0.48  | 0.51 | 0.116E-15 | 0.77  | 0.82  | 0.58  | 0.87  | 1.34E-06   | 0.43 | 0.55 | 0.68 | 0.52 | 2.008E-11 | 0.43      | 0.55 | 0.68 | 0.52 | 2.008E-11 |           |
| RNF208  | Plate 05 | J19 | 727800 | NM_031297 | UGAAAGUUGUCCUUAUUA  | 0.40 | 0.46 | 0.38  | 0.42 | 2.226E-27 | 0.80  | 0.46  | 0.58  | 0.62  | 2.23E-08   | 0.22 | 0.34 | 0.38 | 0.31 | 0         | 0.22      | 0.34 | 0.38 | 0.31 | 0         |           |
| RNF208  | Plate 05 | K19 | 727800 | NM_031297 | CGAGGAGUCCUUAUUAU   | 0.75 | 0.55 | 0.66  | 0.65 | 3.548E-06 | 1.28  | 0.83  | 0.82  | 0.97  | 0.947138   | 0.68 | 0.70 | 1.01 | 0.80 | 0.621306  | 0.68      | 0.70 | 1.01 | 0.80 | 0.621306  |           |
| RNF208  | Plate 05 | L19 | 727800 | NM_031297 | UUGUUGUUAUUAUUAU    | 0.78 | 0.84 | 0.71  | 0.78 | 0.0285533 | 0.90  | 0.96  | 0.98  | 0.94  | 0.858588   | 0.84 | 0.85 | 0.74 | 0.81 | 0.967134  | 0.84      | 0.85 | 0.74 | 0.81 | 0.967134  |           |
| RNF2    | Plate 05 | E17 | 80352  | NM_025236 | CAAGGAGUCCUUAUUAU   | 0.69 | 0.58 | 0.48  | 0.52 | 0.2628161 | 0.75  | 0.79  | 0.64  | 0.73  | 0.0308227  | 0.53 | 0.59 | 0.62 | 0.54 | 2.957E-13 | 0.53      | 0.59 | 0.62 | 0.54 | 2.957E-13 |           |
| RNF26   | Plate 05 | N21 | 79102  | NM_032015 | CGCCGAGGAGUCCUUAU   | 0.84 | 0.81 | 0.82  | 0.82 | 0.174043  | 0.92  | 1.13  | 0.99  | 1.01  | 0.559495   | 0.65 | 0.75 | 0.59 | 0.66 | 0.000652  | 0.65      | 0.75 | 0.59 | 0.66 | 0.000652  |           |
| RNF26   | Plate 05 | O21 | 79102  | NM_032015 | CGAGUCCAGAGGCGAAGA  | 0.78 | 0.74 | 0.72  | 0.75 | 0.006838  | 0.76  | 0.99  | 0.76  | 0.84  | 0.0852727  | 0.61 | 0.58 | 0.56 | 0.58 | 3.343E-08 | 0.61      | 0.58 | 0.56 | 0.58 | 3.343E-08 |           |
| RNF26   | Plate 05 | P21 | 79102  | NM_032015 | CGAGGAGUCCUUAUUAU   | 1.02 | 0.45 | -0.95 | 0.17 | 0.008012  | -1.02 | -0.36 | -0.13 | -0.50 | 1          | 0.37 | 0.02 | 1.27 | 0.55 | 0         | 0.37      | 0.02 | 1.27 | 0.55 | 0         |           |
| RNF39   | Plate 05 | E17 | 80352  | NM_025236 | AGGAGGAGUCCUUAUUA   | 1.18 | 0.73 | 0.77  | 0.90 | 0.569156  | 0.86  | 1.45  | 0.79  | 1.03  | 0.676777   | 0.82 | 0.42 | 0.70 | 0.65 | 1.035E-05 | 0.82      | 0.42 | 0.70 | 0.65 | 1.035E-05 |           |
| RNF39   | Plate 05 | F17 | 80352  | NM_025236 | AGGAGGAGUCCUUAUUA   | 0.68 | 0.68 | 0.68  | 0.68 | 0.0000000 | 0.68  | 0.68  | 0.68  | 0.68  | 0.0000000  | 0.68 | 0.68 | 0.68 | 0.68 | 0.0000000 | 0.68      | 0.68 | 0.68 | 0.68 | 0.0000000 |           |
| RNF39   | Plate 05 | G17 | 80352  | NM_025236 | CGAGGAGUCCUUAUUAU   | 1.27 | 0.97 | 1.09  | 1.11 | 0.0079974 | 1.24  | 1.33  | 1.20  | 1.25  | 0.015886   | 1.05 | 0.76 | 0.90 | 0.90 | 0.074648  | 1.05      | 0.76 | 0.90 | 0.90 | 0.074648  |           |
| RNF39   | Plate 05 | H17 | 80352  | NM_025236 | AAGAUUAUUAUUAUUAU   | 0.81 | 0.81 | 0.77  | 0.80 | 0.0698633 | 0.99  | 0.98  | 1.04  | 1.00  | 0.609359   | 0.85 | 0.76 | 0.90 | 0.76 | 0.04648   | 0.85      | 0.76 | 0.90 | 0.76 | 0.04648   |           |
| RNF11   | Plate 05 | A22 | 51136  | NM_016125 | CAGAUUAUUAUUAUUAU   | 0.64 | 0.56 | 0.62  | 0.61 | 2.642E-08 | 1.24  | 0.94  | 0.66  | 0.95  | 0.578862   | 0.58 | 0.50 | 0.60 | 0.56 | 3.87E-10  | 0.58      | 0.50 | 0.60 | 0.56 | 3.87E-10  |           |
| RNF11   | Plate 05 | B22 | 51136  | NM_016125 | GAUUGGAGUCCUUAUUA   | 0.74 | 0.76 | 0.44  | 0.65 | 3.932E-07 | 1.71  | 0.95  | 1.02  | 0.89  | 0.200282   | 0.55 | 0.49 | 0.34 | 0.46 | 4.439E-23 | 0.55      | 0.49 | 0.34 | 0.46 | 4.439E-23 |           |
| RNF11   | Plate 05 | C22 | 51136  | NM_016125 | CGAGGAGUCCUUAUUAU   | 0.62 | 0.72 | 0.62  | 0.65 | 0.0000000 | 0.62  | 0.72  | 0.62  | 0.65  | 0.0000000  | 0.62 | 0.72 | 0.62 | 0.65 | 0.0000000 | 0.62      | 0.72 | 0.62 | 0.65 | 0.0000000 |           |
| RNF11   | Plate 05 | D22 | 51136  | NM_016125 | CGAGGAGUCCUUAUUAU   | 1.34 | 1.04 | 0.47  | 0.85 | 0.530346  | 0.81  | 0.38  | 0.76  | 0.65  | 1.667E-07  | 1.48 | 0.62 | 0.73 | 0.64 | 0.163368  | 1.48      | 0.62 | 0.73 | 0.64 | 0.163368  |           |
| SFTPD   | Plate 05 | E12 | 6441   | NM_00     |                     |      |      |       |      |           |       |       |       |       |            |      |      |      |      |           |           |      |      |      |           |           |

|          |          |     |        |              |                     |      |      |      |      |            |      |      |       |       |           |      |      |      |      |            |
|----------|----------|-----|--------|--------------|---------------------|------|------|------|------|------------|------|------|-------|-------|-----------|------|------|------|------|------------|
| CBS      | Plate 06 | I06 | 875    | NM_000071    | AGAGGAGGAGACACCUA   | 0.64 | 0.60 | 0.60 | 0.61 | 0.0001851  | 0.93 | 0.63 | 0.68  | 0.75  | 0.0001224 | 0.79 | 0.81 | 0.91 | 0.84 | 0.444404   |
| CBS      | Plate 06 | J06 | 875    | NM_000071    | CACCACCCUUGAUGAGAU  | 0.48 | 0.53 | 0.58 | 0.53 | 0.76767-09 | 1.12 | 0.91 | 0.70  | 0.91  | 0.120718  | 0.70 | 0.77 | 0.87 | 0.78 | 0.642894   |
| CBS      | Plate 06 | K06 | 875    | NM_000071    | GGAGCGGUGGUGGACAGG  | 0.35 | 0.55 | 0.61 | 0.71 | 0.040416   | 0.85 | 0.53 | 1.21  | 0.30  | 0.0335903 | 0.52 | 0.56 | 0.58 | 0.38 | 0.0801427  |
| CBS      | Plate 06 | L06 | 875    | NM_000071    | GGAGGAGGUGGCGGUGAA  | 0.79 | 0.77 | 2.35 | 1.30 | 0.2872-06  | 1.06 | 1.54 | 1.22  | 1.27  | 0.0130405 | 0.76 | 1.40 | 1.17 | 1.11 | 3.885E-07  |
| DCAF4    | Plate 06 | M05 | 26094  | NM_181341    | CGAGGAGGUAAGGUGGAA  | 0.45 | 0.36 | 0.61 | 0.47 | 0.285E-14  | 0.58 | 0.86 | 0.70  | 0.71  | 1.302E-05 | 0.44 | 0.47 | 0.56 | 0.49 | 4.66E-17   |
| DCAF4    | Plate 06 | N05 | 26094  | NM_181341    | CUUCAGACAUUGCGUGAA  | 0.89 | 0.77 | 0.92 | 0.86 | 0.390192   | 0.93 | 0.84 | 0.72  | 0.83  | 0.012912  | 0.63 | 0.58 | 0.62 | 0.61 | 4.425E-06  |
| DCAF4    | Plate 06 | O05 | 26094  | NM_181341    | CGAAGUGGUAAGGCGAGUA | 0.61 | 1.08 | 1.92 | 1.20 | 5.361E-05  | 0.75 | 0.32 | 1.03  | 0.70  | 1.088E-08 | 1.10 | 1.04 | 0.83 | 0.99 | 0.0004025  |
| DCAF4    | Plate 06 | P05 | 26094  | NM_181341    | GUUAUUAUCAGAGCGGUU  | 0.69 | 0.79 | 0.60 | 0.70 | 0.0204992  | 0.79 | 0.69 | 0.77  | 0.78  | 0.015343  | 0.71 | 0.75 | 0.89 | 0.72 | 0.0540733  |
| GEZ3     | Plate 06 | I04 | 55632  | NM_017769    | UCAAAAGAUUGUCUCUAA  | 0.64 | 0.54 | 0.59 | 0.59 | 1.735E-05  | 0.84 | 0.74 | 0.56  | 0.71  | 1.233E-05 | 0.72 | 0.61 | 0.68 | 0.67 | 0.00202027 |
| GEZ3     | Plate 06 | J04 | 55632  | NM_017769    | GAGUUGAGUUAUCCAAUUA | 0.79 | 0.77 | 0.65 | 0.74 | 0.203390   | 0.94 | 1.06 | 0.91  | 0.97  | 0.542144  | 0.78 | 0.79 | 0.83 | 0.80 | 0.977141   |
| GEZ3     | Plate 06 | K04 | 55632  | NM_017769    | CCAUCCAGGUGUCAAUUA  | 0.75 | 0.61 | 0.54 | 0.64 | 0.0006284  | 0.80 | 0.86 | 0.91  | 0.85  | 0.0389136 | 0.93 | 0.76 | 0.90 | 0.86 | 0.205447   |
| GEZ3     | Plate 06 | L04 | 55632  | NM_017769    | GUACACACUUAUCCUGAUG | 0.64 | 0.79 | 0.87 | 0.77 | 0.432427   | 0.92 | 0.20 | 0.48  | 0.53  | 1.705E-22 | 0.56 | 0.67 | 1.07 | 0.76 | 0.178655   |
| PEX10    | Plate 06 | A03 | 5192   | NM_002617    | CGCAGAGGACGCGUAGUA  | 0.78 | 0.75 | 0.68 | 0.74 | 0.213409   | 0.61 | 0.51 | 0.42  | 0.51  | 2.026E-16 | 0.26 | 0.69 | 0.42 | 0.46 | 2.481E-21  |
| PEX10    | Plate 06 | B03 | 5192   | NM_002617    | GCUACAUUGGCGUGUUU   | 0.77 | 0.74 | 0.66 | 0.73 | 0.133395   | 1.15 | 0.95 | 0.82  | 0.97  | 0.511186  | 0.70 | 0.72 | 0.38 | 0.60 | 2.975E-08  |
| PEX10    | Plate 06 | C03 | 5192   | NM_002617    | CCACACCAUUGCAGGGUA  | 0.68 | 0.72 | 0.58 | 0.66 | 0.003716   | 0.87 | 0.75 | 0.51  | 0.71  | 5.401E-06 | 0.47 | 0.40 | 0.54 | 0.47 | 6.187E-20  |
| PEX10    | Plate 06 | D03 | 5192   | NM_002617    | CCAAGAGGUCACGCGGUA  | 0.86 | 0.75 | 0.97 | 0.86 | 0.409842   | 1.46 | 0.50 | 1.25  | 1.07  | 0.558085  | 0.51 | 0.75 | 0.74 | 0.67 | 0.0008765  |
| R3HML    | Plate 06 | E04 | 149002 | NM_178491    | UGAUUGCUUACUGGUAUA  | 0.56 | 0.60 | 0.75 | 0.64 | 0.0030706  | 1.90 | 1.21 | 0.97  | 1.36  | 0.0342007 | 0.81 | 0.86 | 1.02 | 0.90 | 0.0562584  |
| R3HML    | Plate 06 | F04 | 149002 | NM_178491    | CGCCUUAUCUGUUGGUA   | 0.91 | 0.81 | 1.02 | 0.81 | 0.9110339  | 0.92 | 0.85 | 1.17  | 0.98  | 0.565895  | 0.65 | 0.71 | 1.03 | 0.90 | 0.63904    |
| R3HML    | Plate 06 | G04 | 149002 | NM_178491    | CCAACAAGUUCAGUGUUU  | 0.59 | 0.63 | 0.67 | 0.63 | 0.0007162  | 0.95 | 0.81 | 0.94  | 0.90  | 0.134221  | 0.58 | 0.70 | 0.69 | 0.66 | 0.0007091  |
| R3HML    | Plate 06 | H04 | 149002 | NM_178491    | ACGCCUUAUUAUUGCCUAA | 0.61 | 0.53 | 0.42 | 0.52 | 7.611E-10  | 0.81 | 1.20 | 1.92  | 1.31  | 0.0259262 | 0.43 | 0.51 | 0.55 | 0.50 | 3.233E-16  |
| RNASEH2C | Plate 06 | M06 | 84153  | NM_032193    | GGACUUCGACGCCUUCUUA | 0.77 | 0.74 | 0.77 | 0.76 | 0.425994   | 0.69 | 0.88 | 0.68  | 0.75  | 0.0002148 | 0.57 | 0.60 | 0.63 | 0.60 | 1.088E-06  |
| RNASEH2C | Plate 06 | N06 | 84153  | NM_032193    | GAUUGGUAUGUGACAGA   | 0.65 | 0.56 | 0.56 | 0.59 | 1.724E-05  | 0.83 | 0.74 | 0.89  | 0.82  | 0.0093675 | 0.84 | 0.67 | 0.69 | 0.73 | 6.125139   |
| RNASEH2C | Plate 06 | O06 | 84153  | NM_032193    | CAAGUGGCGGUGGCCUUA  | 0.80 | 0.50 | 2.59 | 1.30 | 0.0019221  | 2.02 | 1.06 | 0.73  | 1.27  | 0.129856  | 0.92 | 0.82 | 1.06 | 0.93 | 0.0103436  |
| RNASEH2C | Plate 06 | P06 | 84153  | NM_032193    | CGCAGGUAUUCACGACA   | 2.90 | 0.55 | 1.36 | 1.61 | 7.926E-11  | 0.23 | 0.55 | -2.94 | -0.72 | 5.533E-25 | 1.94 | 0.11 | 1.23 | 1.09 | 0.0001731  |
| RNF146   | Plate 06 | E05 | 81847  | NM_030963    | GGACUUCGAGGAAAGUA   | 0.77 | 0.83 | 0.86 | 0.82 | 0.816213   | 0.95 | 0.94 | 0.82  | 0.90  | 0.147214  | 0.69 | 0.77 | 0.81 | 0.76 | 0.341752   |
| RNF146   | Plate 06 | F05 | 81847  | NM_030963    | AGAAGAAGUUCAGUACA   | 0.81 | 0.45 | 0.68 | 0.65 | 0.0008617  | 1.06 | 1.19 | 1.38  | 1.21  | 0.0507349 | 1.10 | 0.67 | 1.02 | 0.93 | 0.0268994  |
| RNF146   | Plate 06 | G05 | 81847  | NM_030963    | GGAUUGUUCUGUUGUUU   | 1.08 | 0.61 | 4.33 | 2.00 | 9.04E-15   | 0.84 | 1.36 | 0.65  | 0.98  | 0.340843  | 0.97 | 0.80 | 2.11 | 1.29 | 3.93E-11   |
| RNF146   | Plate 06 | H05 | 81847  | NM_030963    | UAACAUCUUCUACAA     | 0.60 | 0.54 | 0.87 | 0.67 | 0.0045389  | 1.22 | 0.60 | 1.22  | 1.02  | 0.50328   | 0.52 | 0.44 | 0.67 | 0.54 | 1.01E-11   |
| RNF186   | Plate 06 | I05 | 54546  | NM_019062    | GCAACAACUUGUCCAUCA  | 0.56 | 0.49 | 0.35 | 0.47 | 1.045E-14  | 1.78 | 0.51 | 0.93  | 0.74  | 3.896E-05 | 0.41 | 0.52 | 0.39 | 0.44 | 9.417E-25  |
| RNF186   | Plate 06 | J05 | 54546  | NM_019062    | CCGCAACAGCCUUGCAACA | 0.23 | 0.52 | 0.69 | 0.48 | 3.583E-17  | 1.88 | 0.86 | 0.71  | 1.15  | 0.750903  | 0.27 | 0.39 | 0.68 | 0.45 | 1.018E-28  |
| RNF186   | Plate 06 | K05 | 54546  | NM_019062    | GGAUUGGAGGUAUGUAUA  | 0.65 | 0.85 | 0.85 | 0.78 | 0.626903   | 1.07 | 1.48 | 0.72  | 1.09  | 0.771148  | 0.63 | 0.60 | 0.95 | 0.73 | 0.047983   |
| RNF186   | Plate 06 | L05 | 54546  | NM_019062    | CAUCUACCGUUGUUCUUA  | 0.64 | 0.43 | 0.39 | 0.46 | 4.958E-13  | 0.52 | 0.86 | 0.70  | 0.69  | 1.678E-06 | 0.36 | 0.31 | 0.25 | 0.21 | 0          |
| RNF19B   | Plate 06 | M04 | 127544 | NM_153341    | GAUGGAGGUAUUAUACA   | 0.85 | 0.66 | 0.82 | 0.71 | 0.063204   | 0.75 | 0.80 | 0.93  | 0.83  | 0.0118191 | 0.58 | 0.67 | 0.52 | 0.59 | 1.617E-07  |
| RNF19B   | Plate 06 | N04 | 127544 | NM_153341    | CACGAGGUAUGAAUUGA   | 0.74 | 0.71 | 0.72 | 0.72 | 0.104091   | 0.77 | 0.79 | 0.78  | 0.78  | 0.0106066 | 0.51 | 0.49 | 0.48 | 0.49 | 4.895E-16  |
| RNF19B   | Plate 06 | O04 | 127544 | NM_153341    | GAAAAGGAGUAAAUAUA   | 0.72 | 0.73 | 0.77 | 0.74 | 0.243791   | 0.87 | 0.89 | 0.93  | 0.89  | 0.129707  | 0.83 | 0.81 | 0.79 | 0.81 | 0.808195   |
| RNF19B   | Plate 06 | P04 | 127544 | NM_153341    | GGACUUGGUAUUGUCUUU  | 0.89 | 0.78 | 0.63 | 0.77 | 0.417184   | 0.47 | 0.28 | 0.66  | 0.47  | 8.909E-23 | 0.47 | 0.41 | 0.30 | 0.39 | 6.219E-35  |
| RNF31    | Plate 06 | I03 | 55072  | NM_017999    | CGACAUUACUUCACAGA   | 0.71 | 0.61 | 0.77 | 0.70 | 0.0403934  | 0.68 | 0.47 | 0.46  | 0.54  | 8.64E-15  | 0.47 | 0.44 | 0.52 | 0.48 | 1.199E-18  |
| RNF31    | Plate 06 | J03 | 55072  | NM_017999    | GCCUUAUUAUUGUCUACA  | 1.05 | 0.60 | 1.29 | 0.98 | 0.344971   | 1.02 | 0.68 | 0.82  | 0.84  | 0.014586  | 0.42 | 0.46 | 0.42 | 0.43 | 2.226E-25  |
| RNF31    | Plate 06 | K03 | 55072  | NM_017999    | GGGUGGUGUUCAGUUUAA  | 0.76 | 0.85 | 0.84 | 0.81 | 0.861874   | 0.67 | 0.68 | 0.72  | 0.69  | 4.125E-06 | 0.52 | 0.69 | 0.51 | 0.57 | 0.581E-09  |
| RNF31    | Plate 06 | L03 | 55072  | NM_017999    | GUUAUGGCAACCGGACUA  | 0.51 | 0.52 | 0.65 | 0.56 | 4.119E-07  | 0.62 | 0.36 | 0.44  | 0.47  | 9.5E-21   | 0.34 | 0.36 | 0.50 | 0.40 | 3.237E-33  |
| SCYL2    | Plate 06 | E06 | 55681  | NM_017988    | GACACUUCUACAUUGA    | 0.74 | 0.92 | 0.92 | 0.86 | 0.407004   | 0.95 | 1.06 | 0.89  | 0.97  | 0.512259  | 0.76 | 0.70 | 0.84 | 0.77 | 0.481666   |
| SCYL2    | Plate 06 | F06 | 55681  | NM_017988    | GGACACGAGUAGACUGAU  | 0.77 | 0.69 | 0.58 | 0.68 | 0.0159288  | 1.02 | 0.91 | 0.96  | 0.97  | 0.550226  | 0.76 | 0.62 | 0.61 | 0.66 | 0.0011941  |
| SCYL2    | Plate 06 | G06 | 55681  | NM_017988    | CGAGGUAUUCUUUUUUU   | 0.65 | 0.56 | 0.72 | 0.65 | 0.0016316  | 0.57 | 0.62 | 0.92  | 0.70  | 3.485E-06 | 0.58 | 0.57 | 0.59 | 0.58 | 5.352E-08  |
| SCYL2    | Plate 06 | H06 | 55681  | NM_017988    | GGAGCAUUCUUAUUAUUG  | 0.72 | 0.60 | 0.60 | 0.64 | 0.0013711  | 0.80 | 0.72 | 0.69  | 0.74  | 0.0001177 | 0.65 | 0.51 | 0.51 | 0.56 | 4.104E-10  |
| TRIM49   | Plate 06 | A04 | 57093  | NM_020358    | GAAGAGCCAAUAGUA     | 0.68 | 0.70 | 0.64 | 0.67 | 0.0137809  | 0.99 | 0.80 | 0.83  | 0.87  | 0.0609992 | 0.98 | 0.83 | 0.90 | 0.90 | 0.039106   |
| TRIM49   | Plate 06 | B04 | 57093  | NM_020358    | GGAGGUAUUGUGUAUUU   | 0.74 | 0.76 | 0.90 | 0.80 | 0.885588   | 0.99 | 0.84 | 0.83  | 0.89  | 0.0268158 | 0.61 | 0.59 | 0.58 | 0.59 | 4.313E-07  |
| TRIM49   | Plate 06 | C04 | 57093  | NM_020358    | GAAGGAAUUGGCCUAAA   | 1.14 | 0.79 | 0.83 | 0.92 | 0.1010496  | 0.84 | 1.01 | 0.77  | 0.87  | 0.0767606 | 1.02 | 0.92 | 0.86 | 0.93 | 0.0389462  |
| TRIM49   | Plate 06 | D04 | 57093  | NM_020358    | GAAUCAGAUUGAGAAUA   | 0.86 | 0.49 | 3.77 | 1.71 | 3.74E-07   | 0.36 | 0.44 | 1.04  | 0.61  | 2.66E-13  | 0.91 | 0.35 | 1.68 | 0.98 | 0.7757     |
| UHRF1    | Plate 06 | A05 | 29128  | NM_001048201 | GCCAUCCUUCUUCGUAUA  | 0.63 | 0.58 | 0.67 | 0.63 | 0.0005374  | 0.44 | 0.48 | 0.60  | 0.51  | 7.378E-17 | 0.40 | 0.41 | 0.47 | 0.43 | 1.004E-26  |
| UHRF1    | Plate 06 | B05 | 29128  | NM_001048201 | GAACAGUUCUUGAUCAAG  | 0.76 | 0.71 | 0.77 | 0.75 | 0.295795   | 1.12 | 0.80 | 0.65  | 0.86  | 0.0018802 | 0.87 | 1.09 | 0.62 | 0.86 | 0.412541   |
| UHRF1    | Plate 06 | C05 | 29128  | NM_001048201 | UGGAGGAGCCUUAUUA    | 0.53 | 0.25 | 1.49 | 0.76 | 8.834E-06  | 0.69 | 0.59 | 0.97  | 0.75  | 0.0400161 | 0.46 | 0.47 | 0.65 | 0.53 | 2.919E-13  |
| UHRF1    | Plate 06 | D05 | 29128  | NM_001048201 | GAACGGGUGGUGCAGAU   | 0.83 | 0.28 | 1.81 | 0.97 | 0.322563   | 0.77 | 0.92 | 0.73  | 0.81  | 0.0484566 | 0.92 | 0.41 | 0.79 | 0.71 | 0.0023997  |
| UHRF1    | Plate 06 | I19 | 29128  | NM_001048201 | GCCAUCCUUCUUCGUAUA  | 0.46 | 0.49 | 0.41 | 0.45 | 2.89E-15   | 0.31 | 0.41 | 0.56  | 0.43  | 2.826E-26 | 0.44 | 0.30 | 0.38 | 0.37 | 0          |
| UHRF1    | Plate 06 | J19 | 29128  | NM_001048201 | GCAACUUCUUGUGAUCAAG | 0.86 | 0.62 | 0.50 | 0.66 | 0.0021256  | 0.76 | 0.92 | 0.61  | 0.76  | 0.0003523 | 0.47 | 0.86 | 0.73 | 0.82 | 0.688074   |
| UHRF1    | Plate 06 | K19 | 29128  | NM_001048201 | UGGAGGAGCCUUAUUA    | 0.93 | 0.68 | 0.25 | 0.62 | 4.81E-08   | 1.22 | 0.78 | 0.93  | 0.98  | 0.480851  | 0.51 | 0.92 | 0.77 | 0.73 | 0.0520013  |
| UHRF1    | Plate 06 | L19 | 29128  | NM_001048201 | GAACGGGUGGUGCAGAU   | 1.16 | 1.14 | 1.87 | 1.39 | 1.247E-12  | 1.06 | 2.22 | 2.18  | 1.82  | 5.635E-10 | 1.82 | 0.74 | 1.39 | 1.25 | 1.722E-11  |
| WDR4     | Plate 06 | A06 | 10785  | NM_033661    | CGACUUCUUCUUCGAGAG  | 0.36 | 0.39 | 0.00 | 0.25 | 2.737E-18  | 2.27 | 0.59 | 0.40  | 1.09  | 0.0074146 | 0.21 | 0.4  |      |      |            |
